# Supplementary material
Source: PubMed Central journal article supplement (PMC9062885)
Supplement: NIHMS1790332-supplement-Table_S1.pdf [file NIHMS1790332-supplement-Table_S1.pdf]

## Supplemental Table 1

Nellis et al, Lung metabolome of 1,3-butadiene exposed Collaborative Cross mice reflects metabolic phenotype of human lung cancer

High resolution metabolomics analysis of lung from collaborative-cross mice exposed to butadiene

One-way Anova Results\*, HILIC/ESI+ data

\*values reported for data that was log2- transformed and quantile-normalized

| mz       | time   | mean - | mean - | mean - | mean - | fdr_pvalue | p-value, | p-value, | p-value, | p-value, | p-value, | p-value, |
|----------|--------|--------|--------|--------|--------|------------|----------|----------|----------|----------|----------|----------|
|          |        | Ctrl   | 2ppm   | 20ppm  | 200ppm |            | Ctrl vs  | Ctrl vs  | Ctrl vs  | 2ppm vs  | 2ppm vs  | 20ppm vs |
|          |        |        |        |        |        |            | 2ppm     | 20ppm    | 200ppm   | 20ppm    | 200ppm   | 200ppm   |
| 85.01073 | 41.64  | 13.98  | 12.87  | 12.60  | 13.72  | 2.59E-06   | 7.88E-04 | 1.33E-05 | 8.08E-01 | 8.00E-01 | 2.85E-02 | 1.49E-03 |
| 85.0284  | 53.77  | 20.97  | 22.38  | 21.93  | 21.34  | 1.94E-29   | 3.65E-14 | 7.67E-14 | 6.09E-03 | 4.11E-04 | 7.38E-14 | 3.08E-06 |
| 85.04147 | 65.97  | 16.21  | 15.44  | 15.60  | 15.48  | 1.63E-15   | 2.81E-13 | 3.61E-09 | 8.82E-12 | 3.48E-01 | 9.80E-01 | 6.09E-01 |
| 85.0478  | 66.15  | 20.21  | 20.61  | 20.75  | 20.30  | 7.14E-11   | 8.06E-06 | 9.64E-10 | 6.66E-01 | 3.58E-01 | 2.31E-03 | 2.47E-06 |
| 85.05204 | 69.34  | 14.76  | 13.43  | 13.90  | 13.46  | 3.91E-12   | 1.24E-10 | 3.35E-05 | 8.52E-10 | 8.00E-02 | 9.99E-01 | 1.28E-01 |
| 85.06486 | 72.56  | 15.37  | 13.73  | 13.92  | 13.70  | 1.97E-10   | 2.13E-08 | 6.47E-07 | 2.65E-08 | 8.99E-01 | 9.99E-01 | 8.58E-01 |
| 85.07787 | 77.13  | 19.31  | 20.98  | 20.96  | 20.30  | 1.87E-20   | 7.41E-14 | 7.36E-14 | 7.43E-07 | 1.00E+00 | 1.95E-03 | 2.30E-03 |
| 85.08419 | 74.9   | 14.53  | 13.65  | 13.79  | 14.13  | 1.77E-05   | 2.64E-05 | 4.59E-04 | 1.61E-01 | 8.95E-01 | 7.59E-02 | 2.98E-01 |
| 85.08858 | 291.65 | 15.20  | 16.45  | 14.72  | 15.74  | 6.11E-06   | 9.59E-04 | 4.67E-01 | 3.68E-01 | 3.52E-06 | 1.76E-01 | 1.79E-02 |
| 85.10118 | 277.13 | 15.95  | 13.04  | 13.04  | 13.72  | 7.13E-13   | 9.91E-11 | 7.05E-11 | 1.64E-06 | 1.00E+00 | 3.99E-01 | 3.97E-01 |
| 86.00638 | 19.67  | 16.66  | 7.33   | 7.78   | 8.90   | 8.87E-92   | 3.65E-14 | 3.65E-14 | 3.65E-14 | 4.42E-01 | 5.45E-06 | 1.95E-03 |
| 86.01409 | 41.62  | 13.60  | 12.88  | 12.70  | 13.15  | 5.17E-03   | 3.67E-02 | 3.71E-03 | 3.39E-01 | 8.99E-01 | 7.88E-01 | 3.70E-01 |
| 86.03181 | 38.49  | 16.54  | 15.34  | 15.19  | 15.20  | 4.78E-10   | 1.02E-06 | 2.59E-08 | 9.19E-08 | 9.18E-01 | 9.33E-01 | 1.00E+00 |
| 86.04871 | 64.86  | 15.11  | 13.94  | 14.10  | 14.25  | 4.92E-12   | 3.52E-11 | 8.27E-09 | 3.23E-06 | 7.57E-01 | 2.44E-01 | 7.93E-01 |
| 86.06006 | 281.3  | 17.50  | 15.26  | 15.20  | 15.79  | 6.05E-35   | 3.65E-14 | 3.65E-14 | 7.51E-14 | 9.82E-01 | 1.85E-02 | 5.47E-03 |
| 86.08124 | 74.81  | 14.65  | 14.60  | 14.55  | 14.59  | 9.43E-01   | 9.90E-01 | 9.24E-01 | 9.86E-01 | 9.90E-01 | 1.00E+00 | 9.94E-01 |
| 86.09649 | 52.93  | 24.94  | 24.01  | 24.10  | 24.00  | 2.45E-29   | 4.63E-14 | 7.05E-14 | 4.94E-14 | 6.99E-01 | 9.99E-01 | 6.31E-01 |
| 86.51774 | 47.33  | 16.88  | 14.32  | 16.73  | 16.08  | 6.03E-28   | 3.76E-14 | 8.92E-01 | 1.32E-03 | 5.23E-14 | 7.98E-13 | 1.65E-02 |
| 86.68728 | 56.03  | 15.33  | 13.17  | 12.91  | 13.85  | 3.71E-33   | 3.83E-14 | 3.65E-14 | 3.20E-13 | 4.98E-01 | 1.97E-03 | 5.94E-06 |
| 87.00402 | 285.31 | 20.28  | 16.68  | 16.45  | 17.61  | 4.57E-37   | 3.65E-14 | 3.65E-14 | 7.54E-14 | 8.43E-01 | 6.34E-03 | 3.08E-04 |
| 87.02634 | 45.17  | 16.81  | 13.80  | 14.54  | 14.59  | 2.25E-39   | 3.65E-14 | 3.76E-14 | 4.59E-14 | 1.06E-03 | 6.55E-04 | 9.94E-01 |
| 87.04409 | 170.4  | 16.53  | 14.65  | 15.16  | 15.26  | 6.10E-25   | 4.01E-14 | 7.83E-14 | 1.33E-12 | 9.29E-03 | 1.90E-03 | 9.39E-01 |
| 87.05534 | 74.38  | 19.98  | 19.33  | 19.70  | 19.46  | 2.34E-11   | 4.32E-11 | 1.05E-02 | 3.09E-07 | 4.24E-04 | 5.17E-01 | 5.43E-02 |
| 87.07886 | 56.3   | 15.78  | 13.81  | 14.04  | 14.48  | 1.78E-17   | 7.38E-14 | 3.65E-13 | 1.28E-07 | 7.29E-01 | 2.08E-02 | 2.22E-01 |
| 87.0917  | 188.29 | 15.75  | 13.33  | 13.44  | 14.18  | 3.53E-23   | 7.16E-14 | 7.43E-14 | 1.90E-09 | 9.65E-01 | 3.59E-03 | 1.44E-02 |
| 87.09352 | 40.37  | 16.45  | 13.51  | 13.95  | 14.38  | 1.96E-57   | 3.65E-14 | 3.65E-14 | 3.65E-14 | 1.17E-02 | 9.96E-08 | 2.21E-02 |
| 87.09983 | 47.52  | 20.77  | 19.69  | 19.87  | 19.63  | 5.00E-31   | 3.94E-14 | 7.49E-14 | 3.74E-14 | 2.07E-01 | 9.07E-01 | 4.99E-02 |
| 87.50954 | 269.79 | 16.80  | 15.67  | 13.62  | 15.77  | 9.63E-27   | 5.41E-05 | 3.65E-14 | 4.17E-04 | 4.30E-13 | 9.83E-01 | 1.94E-13 |
| 87.99332 | 54.33  | 15.87  | 14.09  | 13.49  | 13.91  | 1.46E-10   | 4.58E-06 | 3.54E-10 | 7.44E-07 | 3.31E-01 | 9.61E-01 | 6.57E-01 |
| 88.00424 | 276.23 | 19.02  | 16.57  | 15.74  | 17.87  | 6.09E-20   | 9.46E-12 | 7.34E-14 | 4.31E-03 | 6.57E-02 | 1.16E-03 | 1.40E-08 |
| 88.0216  | 182.16 | 15.84  | 13.25  | 14.05  | 14.23  | 1.09E-20   | 6.47E-14 | 1.13E-11 | 3.47E-09 | 7.01E-03 | 8.69E-04 | 8.94E-01 |
| 88.02313 | 23.87  | 15.86  | 16.99  | 16.17  | 17.04  | 5.53E-12   | 6.20E-09 | 2.87E-01 | 3.30E-09 | 6.22E-05 | 9.93E-01 | 3.09E-05 |
| 88.02316 | 142.35 | 17.20  | 15.41  | 15.27  | 15.80  | 1.16E-26   | 6.85E-14 | 4.39E-14 | 3.23E-13 | 8.28E-01 | 1.27E-01 | 1.36E-02 |
| 88.03937 | 78.85  | 22.95  | 22.78  | 23.24  | 22.62  | 3.98E-06   | 4.67E-01 | 4.76E-02 | 2.52E-02 | 6.25E-04 | 5.13E-01 | 2.26E-06 |
| 88.05787 | 70.36  | 19.73  | 20.11  | 20.23  | 19.55  | 7.16E-04   | 1.41E-01 | 2.32E-02 | 7.56E-01 | 9.06E-01 | 1.63E-02 | 1.69E-03 |
| 88.0757  | 280.71 | 18.24  | 16.82  | 16.85  | 16.97  | 7.68E-18   | 9.55E-14 | 1.12E-13 | 1.92E-11 | 9.98E-01 | 8.23E-01 | 8.98E-01 |
| 88.50321 | 40.96  | 18.82  | 13.12  | 16.47  | 13.75  | 8.07E-36   | 3.65E-14 | 6.76E-08 | 3.72E-14 | 2.11E-13 | 4.44E-01 | 3.63E-09 |
| 88.50907 | 276.88 | 20.48  | 15.52  | 15.24  | 17.08  | 2.01E-58   | 3.65E-14 | 3.65E-14 | 3.65E-14 | 7.04E-01 | 1.30E-07 | 3.07E-10 |
| 88.51518 | 37.2   | 15.03  | 11.76  | 15.22  | 14.21  | 3.55E-14   | 5.20E-12 | 9.71E-01 | 2.52E-01 | 1.17E-12 | 1.14E-06 | 1.18E-01 |
| 88.52077 | 264.01 | 18.05  | 15.22  | 15.48  | 15.69  | 1.61E-36   | 3.65E-14 | 3.65E-14 | 4.67E-14 | 6.01E-01 | 1.22E-01 | 7.36E-01 |
| 88.9526  | 278.43 | 18.55  | 14.91  | 15.19  | 15.77  | 2.97E-40   | 3.65E-14 | 3.65E-14 | 4.90E-14 | 6.53E-01 | 4.09E-03 | 9.63E-02 |
| 88.95263 | 26.21  | 18.05  | 18.14  | 18.19  | 18.09  | 7.39E-01   | 8.88E-01 | 7.11E-01 | 9.90E-01 | 9.88E-01 | 9.80E-01 | 8.95E-01 |
| 89.00197 | 264.82 | 19.47  | 14.84  | 14.87  | 16.69  | 3.13E-65   | 3.65E-14 | 3.65E-14 | 3.65E-14 | 9.99E-01 | 1.06E-13 | 1.30E-13 |
| 89.00833 | 139.73 | 19.28  | 16.02  | 15.27  | 17.89  | 1.09E-47   | 3.65E-14 | 3.65E-14 | 4.10E-08 | 7.69E-03 | 8.79E-13 | 5.67E-14 |
| 89.02493 | 49.45  | 16.30  | 15.66  | 15.44  | 15.72  | 1.58E-03   | 2.53E-02 | 9.68E-04 | 6.46E-02 | 7.89E-01 | 9.93E-01 | 6.41E-01 |
| 89.03638 | 69.68  | 14.50  | 12.14  | 12.79  | 12.56  | 5.44E-14   | 3.26E-13 | 7.82E-08 | 3.63E-09 | 1.33E-01 | 5.29E-01 | 8.74E-01 |
| 89.03864 | 38.61  | 16.76  | 14.58  | 14.82  | 14.95  | 4.58E-21   | 7.47E-14 | 7.49E-14 | 5.65E-13 | 7.17E-01 | 3.95E-01 | 9.44E-01 |
| 89.04185 | 278.15 | 16.36  | 14.38  | 14.65  | 14.72  | 1.27E-09   | 1.08E-08 | 7.16E-07 | 4.70E-06 | 8.38E-01 | 7.49E-01 | 9.97E-01 |
| 89.05975 | 183.91 | 16.41  | 13.96  | 14.44  | 14.87  | 1.00E-36   | 3.65E-14 | 3.74E-14 | 7.43E-14 | 2.24E-02 | 1.45E-06 | 5.36E-02 |
| 89.50675 | 268.2  | 24.92  | 21.50  | 20.71  | 22.58  | 3.03E-34   | 4.27E-14 | 3.65E-14 | 1.60E-12 | 4.54E-02 | 3.54E-03 | 3.56E-08 |
| 89.93981 | 22.23  | 16.32  | 7.05   | 7.26   | 8.10   | 1.47E-115  | 3.65E-14 | 3.65E-14 | 3.65E-14 | 7.87E-01 | 8.57E-05 | 2.54E-03 |
| 90.00531 | 19.61  | 19.34  | 8.62   | 8.96   | 12.44  | 2.92E-58   | 3.65E-14 | 3.65E-14 | 3.67E-14 | 9.18E-01 | 4.02E-10 | 9.90E-09 |
| 90.0082  | 277.49 | 20.27  | 15.99  | 15.49  | 17.56  | 7.09E-41   | 3.65E-14 | 3.65E-14 | 7.76E-14 | 3.83E-01 | 1.12E-05 | 3.24E-09 |
| 90.03723 | 190.05 | 15.96  | 13.99  | 14.29  | 14.53  | 1.24E-31   | 3.65E-14 | 4.76E-14 | 7.34E-14 | 2.10E-01 | 3.57E-03 | 3.87E-01 |
| 90.04361 | 69.94  | 15.17  | 13.06  | 13.59  | 13.56  | 2.30E-13   | 6.00E-13 | 4.83E-08 | 8.19E-08 | 2.01E-01 | 2.74E-01 | 1.00E+00 |
| 90.05501 | 68.19  | 23.94  | 23.55  | 23.87  | 23.60  | 1.40E-08   | 3.75E-07 | 6.84E-01 | 2.28E-05 | 1.00E-04 | 8.98E-01 | 2.33E-03 |
| 90.0626  | 70.62  | 14.78  | 14.10  | 14.01  | 13.81  | 5.84E-03   | 8.40E-02 | 3.39E-02 | 5.72E-03 | 9.88E-01 | 7.65E-01 | 9.09E-01 |
| 90.09135 | 293.5  | 16.30  | 14.97  | 15.27  | 14.98  | 4.12E-15   | 9.05E-13 | 2.21E-08 | 4.78E-12 | 2.95E-01 | 1.00E+00 | 3.57E-01 |
| 90.09138 | 186.19 | 17.14  | 15.57  | 16.13  | 16.08  | 1.23E-13   | 1.15E-13 | 7.87E-07 | 6.41E-07 | 2.12E-02 | 5.10E-02 | 9.96E-01 |
| 90.50696 | 268.51 | 21.99  | 20.26  | 19.69  | 20.25  | 1.31E-05   | 1.75E-03 | 1.08E-05 | 2.32E-03 | 6.50E-01 | 1.00E+00 | 6.77E-01 |
| 90.52584 | 266.01 | 25.42  | 24.40  | 24.38  | 24.55  | 1.31E-03   | 4.77E-03 | 3.17E-03 | 2.74E-02 | 1.00E+00 | 9.67E-01 | 9.46E-01 |
| 90.90375 | 56.22  | 16.48  | 13.47  | 14.31  | 14.75  | 5.66E-27   | 3.67E-14 | 7.43E-14 | 1.07E-10 | 4.06E-03 | 5.15E-06 | 2.93E-01 |
| 90.94769 | 287.66 | 18.08  | 15.75  | 15.30  | 16.59  | 1.05E-07   | 1.62E-05 | 1.38E-07 | 1.59E-02 | 8.02E-01 | 3.57E-01 | 5.67E-02 |

|          |        |       |       |       |       |          |          |          |          |          |          |          |
|----------|--------|-------|-------|-------|-------|----------|----------|----------|----------|----------|----------|----------|
| 90.97666 | 46.18  | 19.97 | 19.51 | 19.56 | 19.79 | 3.22E-03 | 5.23E-03 | 1.55E-02 | 6.05E-01 | 9.84E-01 | 2.04E-01 | 3.65E-01 |
| 91.00112 | 271.57 | 16.80 | 14.32 | 14.54 | 14.95 | 8.10E-16 | 1.23E-13 | 3.27E-12 | 3.30E-08 | 8.85E-01 | 1.91E-01 | 5.60E-01 |
| 91.00589 | 133.93 | 19.63 | 15.32 | 15.89 | 16.27 | 2.50E-45 | 3.65E-14 | 3.65E-14 | 3.65E-14 | 1.30E-01 | 2.73E-03 | 4.77E-01 |
| 91.0059  | 35.04  | 20.87 | 20.66 | 21.33 | 20.64 | 2.15E-03 | 7.02E-01 | 8.06E-02 | 6.46E-01 | 4.83E-03 | 9.99E-01 | 4.33E-03 |
| 91.0086  | 143.96 | 17.94 | 14.41 | 13.79 | 16.64 | 1.53E-32 | 5.43E-14 | 3.65E-14 | 5.10E-04 | 2.35E-01 | 1.26E-09 | 8.63E-14 |
| 91.01789 | 45.37  | 16.55 | 14.19 | 16.60 | 16.30 | 2.32E-22 | 7.58E-14 | 9.97E-01 | 7.37E-01 | 7.21E-14 | 1.00E-13 | 6.31E-01 |
| 91.02356 | 272.18 | 20.44 | 18.26 | 18.02 | 18.08 | 1.61E-19 | 3.19E-13 | 7.38E-14 | 9.19E-14 | 8.17E-01 | 9.27E-01 | 9.95E-01 |
| 91.0275  | 269.2  | 21.56 | 19.87 | 19.64 | 20.24 | 5.59E-10 | 2.05E-07 | 2.05E-09 | 1.12E-04 | 8.65E-01 | 6.48E-01 | 2.17E-01 |
| 91.039   | 125.99 | 14.01 | 15.20 | 15.22 | 14.94 | 4.83E-15 | 2.99E-12 | 8.07E-13 | 9.70E-08 | 9.99E-01 | 3.95E-01 | 3.11E-01 |
| 91.03975 | 45.15  | 16.50 | 12.12 | 13.14 | 12.76 | 3.77E-25 | 4.92E-14 | 7.62E-14 | 7.41E-14 | 4.79E-02 | 4.00E-01 | 7.72E-01 |
| 91.05204 | 56.83  | 15.82 | 12.98 | 13.66 | 13.61 | 8.31E-40 | 3.65E-14 | 3.74E-14 | 3.85E-14 | 1.38E-03 | 5.36E-03 | 9.93E-01 |
| 91.05422 | 289.37 | 19.75 | 17.63 | 17.55 | 17.73 | 8.80E-11 | 3.06E-08 | 5.97E-09 | 2.97E-07 | 9.95E-01 | 9.93E-01 | 9.58E-01 |
| 91.05815 | 143.87 | 14.74 | 13.66 | 13.80 | 13.83 | 2.12E-03 | 3.48E-03 | 1.31E-02 | 2.53E-02 | 9.74E-01 | 9.53E-01 | 9.99E-01 |
| 91.49338 | 96     | 18.58 | 18.65 | 18.32 | 18.20 | 2.80E-01 | 9.91E-01 | 7.37E-01 | 4.57E-01 | 5.80E-01 | 3.24E-01 | 9.65E-01 |
| 91.50464 | 268.45 | 20.69 | 18.62 | 17.49 | 19.39 | 7.14E-11 | 2.31E-05 | 1.67E-11 | 2.18E-02 | 5.73E-02 | 3.42E-01 | 2.67E-04 |
| 91.50754 | 35.98  | 17.01 | 15.23 | 16.80 | 15.17 | 1.33E-08 | 7.16E-06 | 9.39E-01 | 5.65E-06 | 1.39E-04 | 9.98E-01 | 1.04E-04 |
| 91.52388 | 253.96 | 18.27 | 15.41 | 15.54 | 16.02 | 8.72E-39 | 3.65E-14 | 3.65E-14 | 5.30E-14 | 9.06E-01 | 1.85E-02 | 9.85E-02 |
| 91.54237 | 89.14  | 16.41 | 17.15 | 17.55 | 17.13 | 4.99E-06 | 3.89E-03 | 1.47E-06 | 6.59E-03 | 2.78E-01 | 1.00E+00 | 2.67E-01 |
| 91.96234 | 192.16 | 8.45  | 11.33 | 11.33 | 12.43 | 3.74E-10 | 5.49E-06 | 4.35E-06 | 5.91E-10 | 1.00E+00 | 2.67E-01 | 2.61E-01 |
| 91.99956 | 273.54 | 16.77 | 13.88 | 14.74 | 14.90 | 1.08E-16 | 7.46E-14 | 1.51E-09 | 7.20E-08 | 3.47E-02 | 1.17E-02 | 9.66E-01 |
| 92.01649 | 154.27 | 10.51 | 14.53 | 13.27 | 15.48 | 4.67E-26 | 7.48E-14 | 4.76E-10 | 4.03E-14 | 1.54E-02 | 1.27E-01 | 3.39E-06 |
| 92.02492 | 37.04  | 16.91 | 14.39 | 14.59 | 14.77 | 1.75E-35 | 3.65E-14 | 3.67E-14 | 4.98E-14 | 7.19E-01 | 2.07E-01 | 7.78E-01 |
| 92.04001 | 76.63  | 17.09 | 17.67 | 17.77 | 17.86 | 1.02E-06 | 6.53E-04 | 3.31E-05 | 4.53E-06 | 9.10E-01 | 6.13E-01 | 9.37E-01 |
| 92.0576  | 43.89  | 18.11 | 16.05 | 16.17 | 16.30 | 5.35E-24 | 7.09E-14 | 7.49E-14 | 7.38E-14 | 9.24E-01 | 6.25E-01 | 9.31E-01 |
| 92.05924 | 56.59  | 15.66 | 13.59 | 14.22 | 14.46 | 1.01E-34 | 3.65E-14 | 7.01E-14 | 8.56E-14 | 5.96E-05 | 5.22E-08 | 3.66E-01 |
| 92.50345 | 145.55 | 17.90 | 14.15 | 13.61 | 16.34 | 3.80E-36 | 3.72E-14 | 3.65E-14 | 6.77E-06 | 2.99E-01 | 5.32E-10 | 8.47E-14 |
| 92.52228 | 273.75 | 20.28 | 17.74 | 17.60 | 18.59 | 7.39E-23 | 7.36E-14 | 7.18E-14 | 6.88E-09 | 9.57E-01 | 1.10E-02 | 1.91E-03 |
| 92.57587 | 133.26 | 16.40 | 17.24 | 17.56 | 16.78 | 1.34E-09 | 2.39E-05 | 1.42E-09 | 1.57E-01 | 2.72E-01 | 7.42E-02 | 2.11E-04 |
| 92.98592 | 264.65 | 17.27 | 14.83 | 15.07 | 15.16 | 2.14E-26 | 5.27E-14 | 7.38E-14 | 7.36E-14 | 7.19E-01 | 4.82E-01 | 9.76E-01 |
| 93.01535 | 70.94  | 16.19 | 14.19 | 14.77 | 14.37 | 2.28E-13 | 3.70E-12 | 7.58E-07 | 6.15E-10 | 1.29E-01 | 9.17E-01 | 4.49E-01 |
| 93.01989 | 40.13  | 13.48 | 11.09 | 13.86 | 12.78 | 1.09E-05 | 1.44E-04 | 9.05E-01 | 6.05E-01 | 1.28E-05 | 2.29E-02 | 2.53E-01 |
| 93.04478 | 78.35  | 18.96 | 18.22 | 18.39 | 18.28 | 1.16E-14 | 5.79E-13 | 1.75E-08 | 8.01E-11 | 2.77E-01 | 9.30E-01 | 6.64E-01 |
| 93.05736 | 39.7   | 17.05 | 14.82 | 15.26 | 15.42 | 5.13E-18 | 7.48E-14 | 4.65E-12 | 9.05E-10 | 2.67E-01 | 8.62E-02 | 9.28E-01 |
| 93.06987 | 279.62 | 17.68 | 15.42 | 15.45 | 15.38 | 1.80E-24 | 7.27E-14 | 7.45E-14 | 7.45E-14 | 9.99E-01 | 9.98E-01 | 9.89E-01 |
| 93.48573 | 268.49 | 16.73 | 14.18 | 14.82 | 14.90 | 1.49E-25 | 3.94E-14 | 7.44E-14 | 1.26E-13 | 1.97E-02 | 9.17E-03 | 9.85E-01 |
| 93.50387 | 136.76 | 19.87 | 16.45 | 17.04 | 17.34 | 2.73E-24 | 5.30E-14 | 7.36E-14 | 3.26E-13 | 2.42E-01 | 3.15E-02 | 7.75E-01 |
| 93.60185 | 288.28 | 13.23 | 14.75 | 13.08 | 14.31 | 1.01E-03 | 7.41E-03 | 9.90E-01 | 1.17E-01 | 3.59E-03 | 8.08E-01 | 6.69E-02 |
| 93.98407 | 276.21 | 20.35 | 19.01 | 19.34 | 18.94 | 1.70E-06 | 2.08E-05 | 2.08E-03 | 1.09E-05 | 6.60E-01 | 9.94E-01 | 5.14E-01 |
| 93.98412 | 129    | 19.25 | 17.41 | 18.46 | 16.90 | 3.02E-29 | 7.24E-14 | 1.02E-04 | 3.70E-14 | 3.80E-07 | 4.21E-02 | 2.51E-13 |
| 94.04002 | 192.79 | 14.25 | 16.34 | 16.78 | 15.73 | 1.04E-12 | 7.74E-09 | 2.18E-12 | 1.16E-04 | 5.65E-01 | 2.97E-01 | 1.41E-02 |
| 94.0451  | 111.07 | 21.27 | 20.40 | 20.67 | 20.67 | 6.51E-04 | 3.51E-04 | 2.49E-02 | 3.12E-02 | 6.02E-01 | 6.38E-01 | 1.00E+00 |
| 94.06516 | 192.81 | 17.67 | 16.22 | 16.39 | 16.62 | 1.08E-12 | 1.36E-11 | 1.40E-09 | 1.96E-06 | 8.39E-01 | 2.24E-01 | 6.77E-01 |
| 94.50232 | 152.05 | 19.58 | 15.57 | 15.68 | 16.45 | 2.65E-36 | 3.65E-14 | 3.65E-14 | 6.94E-14 | 9.83E-01 | 2.32E-02 | 5.77E-02 |
| 94.52082 | 262.86 | 17.18 | 14.21 | 14.17 | 14.94 | 1.43E-42 | 3.65E-14 | 3.65E-14 | 5.07E-14 | 9.98E-01 | 2.80E-03 | 1.33E-03 |
| 94.54576 | 109.7  | 17.77 | 16.43 | 17.46 | 16.99 | 2.22E-04 | 1.43E-04 | 7.49E-01 | 7.04E-02 | 7.46E-03 | 3.29E-01 | 4.68E-01 |
| 94.92965 | 41.85  | 15.81 | 16.03 | 16.15 | 16.19 | 2.69E-02 | 3.44E-01 | 5.90E-02 | 3.16E-02 | 8.48E-01 | 6.90E-01 | 9.89E-01 |
| 95.00291 | 273.97 | 17.25 | 14.35 | 14.56 | 15.13 | 1.26E-24 | 6.16E-14 | 7.43E-14 | 1.85E-12 | 8.68E-01 | 3.06E-02 | 1.75E-01 |
| 95.01254 | 70.58  | 18.56 | 18.05 | 17.95 | 17.94 | 4.80E-04 | 1.38E-02 | 1.58E-03 | 2.10E-03 | 9.32E-01 | 9.23E-01 | 1.00E+00 |
| 95.024   | 257.2  | 17.65 | 17.03 | 16.52 | 16.77 | 1.39E-11 | 4.31E-04 | 9.87E-12 | 3.22E-07 | 6.12E-03 | 3.55E-01 | 4.03E-01 |
| 95.04387 | 97.64  | 18.00 | 17.36 | 17.66 | 17.68 | 3.71E-02 | 1.72E-02 | 4.04E-01 | 4.89E-01 | 5.05E-01 | 4.81E-01 | 1.00E+00 |
| 95.04915 | 295.78 | 17.46 | 15.76 | 15.74 | 15.92 | 4.22E-25 | 7.07E-14 | 6.83E-14 | 7.45E-14 | 9.99E-01 | 8.16E-01 | 7.43E-01 |
| 95.06041 | 209.02 | 17.48 | 15.24 | 15.61 | 16.11 | 3.72E-25 | 4.41E-14 | 7.61E-14 | 3.32E-10 | 2.33E-01 | 1.66E-04 | 6.87E-02 |
| 95.08552 | 281.19 | 20.02 | 17.77 | 17.60 | 18.36 | 5.56E-14 | 5.65E-11 | 1.43E-12 | 3.02E-06 | 9.53E-01 | 2.85E-01 | 9.89E-02 |
| 95.50168 | 276.25 | 19.35 | 16.62 | 16.96 | 16.80 | 9.36E-27 | 5.34E-14 | 7.43E-14 | 7.27E-14 | 5.12E-01 | 8.88E-01 | 9.26E-01 |
| 95.523   | 48.67  | 16.32 | 13.91 | 15.81 | 15.21 | 5.72E-17 | 7.52E-14 | 1.92E-01 | 2.10E-04 | 3.66E-11 | 1.62E-05 | 1.16E-01 |
| 96.00804 | 203.6  | 16.45 | 13.66 | 14.31 | 14.15 | 2.14E-47 | 3.65E-14 | 3.65E-14 | 3.65E-14 | 3.57E-04 | 1.61E-02 | 7.69E-01 |
| 96.0206  | 37.87  | 14.02 | 11.43 | 14.75 | 14.03 | 8.26E-10 | 1.29E-06 | 4.29E-01 | 1.00E+00 | 1.06E-09 | 4.75E-06 | 4.97E-01 |
| 96.02848 | 81.47  | 15.99 | 16.17 | 16.08 | 16.47 | 1.14E-01 | 8.00E-01 | 9.70E-01 | 8.41E-02 | 9.69E-01 | 4.71E-01 | 2.30E-01 |
| 96.03318 | 29.37  | 14.72 | 14.86 | 12.59 | 14.20 | 9.42E-11 | 9.75E-01 | 4.12E-09 | 4.18E-01 | 1.34E-09 | 2.36E-01 | 4.46E-05 |
| 96.04438 | 288.52 | 19.44 | 18.10 | 18.14 | 18.34 | 1.41E-06 | 1.26E-05 | 1.72E-05 | 7.01E-04 | 1.00E+00 | 8.51E-01 | 8.95E-01 |
| 96.04445 | 35.75  | 21.53 | 21.00 | 21.14 | 21.11 | 8.09E-07 | 8.59E-07 | 4.83E-04 | 2.84E-04 | 4.81E-01 | 6.79E-01 | 9.93E-01 |
| 96.06823 | 72.5   | 15.82 | 15.43 | 15.99 | 14.92 | 1.31E-01 | 8.32E-01 | 9.82E-01 | 2.26E-01 | 6.36E-01 | 7.18E-01 | 1.21E-01 |
| 96.08081 | 178.76 | 16.24 | 13.71 | 14.33 | 15.13 | 2.13E-36 | 3.65E-14 | 4.36E-14 | 2.66E-09 | 1.86E-03 | 3.47E-13 | 4.63E-05 |
| 96.08884 | 22.52  | 15.93 | 9.03  | 8.75  | 12.08 | 2.40E-41 | 3.65E-14 | 3.65E-14 | 3.70E-13 | 9.38E-01 | 1.77E-08 | 5.64E-10 |
| 96.08889 | 206.3  | 16.01 | 13.07 | 13.51 | 13.63 | 1.83E-25 | 4.98E-14 | 7.28E-14 | 7.54E-14 | 3.48E-01 | 1.81E-01 | 9.74E-01 |
| 96.92181 | 50.23  | 21.80 | 22.56 | 22.66 | 22.52 | 2.50E-11 | 4.61E-08 | 3.65E-10 | 4.13E-07 | 8.59E-01 | 9.94E-01 | 7.30E-01 |
| 96.96091 | 286.96 | 21.04 | 16.65 | 16.25 | 18.42 | 6.42E-55 | 3.65E-14 | 3.65E-14 | 6.89E-14 | 3.79E-01 | 2.81E-10 | 8.80E-14 |
| 97.00093 | 88.81  | 17.60 | 18.84 | 19.14 | 18.96 | 2.64E-13 | 3.50E-08 | 4.67E-12 | 2.97E-09 | 4.71E-01 | 9.35E-01 | 8.46E-01 |

|           |        |       |       |       |       |           |          |          |          |          |          |          |
|-----------|--------|-------|-------|-------|-------|-----------|----------|----------|----------|----------|----------|----------|
| 97.00535  | 37.57  | 15.75 | 12.20 | 14.44 | 14.07 | 7.47E-19  | 7.16E-14 | 7.38E-04 | 1.59E-05 | 5.03E-09 | 2.93E-06 | 7.31E-01 |
| 97.00759  | 297.02 | 14.95 | 12.48 | 11.73 | 13.20 | 5.10E-17  | 9.31E-11 | 7.36E-14 | 1.06E-05 | 1.46E-01 | 2.06E-01 | 3.97E-04 |
| 97.0284   | 266.11 | 20.53 | 21.44 | 22.01 | 21.30 | 1.56E-11  | 2.14E-05 | 1.81E-12 | 6.90E-04 | 2.28E-02 | 9.00E-01 | 3.09E-03 |
| 97.03966  | 280.34 | 16.73 | 15.01 | 14.67 | 15.38 | 1.47E-30  | 6.07E-14 | 3.65E-14 | 1.16E-13 | 1.50E-01 | 1.18E-01 | 1.37E-04 |
| 97.03969  | 155.62 | 17.00 | 15.85 | 15.95 | 16.67 | 1.21E-19  | 7.54E-14 | 1.21E-13 | 5.92E-02 | 8.43E-01 | 1.95E-08 | 9.49E-07 |
| 97.04783  | 31.9   | 17.14 | 15.09 | 15.20 | 15.71 | 3.61E-51  | 3.65E-14 | 3.65E-14 | 3.70E-14 | 7.44E-01 | 2.23E-06 | 1.50E-04 |
| 97.06479  | 286.2  | 17.50 | 16.10 | 15.90 | 16.45 | 6.52E-18  | 3.46E-13 | 7.52E-14 | 1.02E-07 | 7.04E-01 | 2.13E-01 | 1.53E-02 |
| 97.06485  | 22.39  | 17.47 | 15.75 | 15.42 | 15.58 | 3.36E-16  | 2.09E-10 | 1.15E-13 | 1.27E-11 | 5.72E-01 | 9.22E-01 | 9.26E-01 |
| 97.07607  | 205.15 | 16.59 | 14.04 | 14.52 | 14.88 | 8.94E-38  | 3.65E-14 | 3.67E-14 | 7.44E-14 | 2.41E-02 | 1.57E-05 | 1.64E-01 |
| 97.10119  | 288.16 | 18.47 | 16.31 | 16.24 | 16.37 | 4.06E-22  | 7.41E-14 | 7.41E-14 | 7.75E-14 | 9.91E-01 | 9.95E-01 | 9.50E-01 |
| 97.51434  | 282.8  | 19.28 | 15.54 | 15.16 | 17.00 | 4.30E-40  | 3.65E-14 | 3.65E-14 | 1.30E-13 | 4.92E-01 | 2.98E-06 | 1.77E-09 |
| 97.96437  | 19.69  | 15.83 | 8.73  | 9.26  | 9.70  | 3.97E-113 | 3.65E-14 | 3.65E-14 | 3.65E-14 | 1.76E-02 | 1.85E-06 | 7.42E-02 |
| 97.96869  | 32.69  | 18.49 | 11.81 | 11.18 | 16.08 | 8.31E-50  | 3.65E-14 | 3.65E-14 | 3.20E-07 | 4.48E-01 | 7.32E-14 | 5.25E-04 |
| 97.99134  | 274.16 | 23.85 | 22.44 | 22.79 | 22.42 | 3.42E-06  | 2.47E-05 | 2.28E-03 | 3.08E-05 | 6.68E-01 | 1.00E+00 | 6.42E-01 |
| 97.9914   | 121.89 | 23.13 | 21.24 | 21.20 | 21.00 | 1.23E-20  | 9.38E-14 | 7.84E-14 | 7.31E-14 | 9.98E-01 | 7.50E-01 | 8.44E-01 |
| 98.00595  | 63.35  | 15.28 | 14.32 | 14.43 | 14.27 | 1.25E-03  | 5.27E-03 | 1.50E-02 | 4.03E-03 | 9.85E-01 | 9.99E-01 | 9.59E-01 |
| 98.01355  | 279.23 | 19.71 | 15.94 | 15.64 | 17.49 | 1.21E-30  | 4.19E-14 | 3.67E-14 | 9.07E-10 | 7.87E-01 | 5.47E-05 | 6.62E-07 |
| 98.02373  | 74.71  | 16.27 | 13.03 | 14.14 | 14.05 | 9.62E-32  | 3.65E-14 | 7.49E-14 | 7.48E-14 | 2.52E-05 | 2.15E-04 | 9.85E-01 |
| 98.03178  | 255.59 | 15.87 | 15.67 | 15.76 | 15.66 | 7.37E-01  | 7.83E-01 | 9.52E-01 | 7.55E-01 | 9.77E-01 | 1.00E+00 | 9.66E-01 |
| 98.06005  | 272.61 | 19.59 | 17.79 | 17.62 | 17.89 | 4.65E-10  | 1.99E-07 | 7.75E-09 | 2.06E-06 | 9.50E-01 | 8.89E-01 | 8.35E-01 |
| 98.09647  | 175.64 | 16.16 | 13.87 | 14.06 | 14.55 | 5.13E-35  | 3.65E-14 | 3.65E-14 | 7.49E-14 | 6.66E-01 | 6.86E-04 | 2.53E-02 |
| 98.47062  | 299.74 | 16.85 | 14.83 | 15.07 | 15.13 | 1.83E-09  | 2.09E-08 | 7.30E-07 | 4.40E-06 | 8.89E-01 | 8.19E-01 | 9.98E-01 |
| 98.51202  | 263.86 | 24.60 | 20.90 | 20.18 | 22.61 | 1.21E-36  | 3.72E-14 | 3.65E-14 | 3.19E-09 | 8.81E-02 | 1.13E-06 | 2.37E-12 |
| 98.91888  | 50.94  | 20.65 | 21.31 | 21.46 | 21.25 | 2.95E-09  | 2.65E-06 | 6.28E-09 | 4.29E-05 | 6.99E-01 | 9.67E-01 | 4.25E-01 |
| 98.96136  | 268.88 | 20.32 | 18.03 | 17.33 | 18.83 | 3.91E-13  | 2.79E-08 | 4.07E-13 | 8.71E-04 | 2.69E-01 | 1.81E-01 | 1.01E-03 |
| 98.9754   | 22.3   | 20.09 | 20.43 | 20.52 | 19.84 | 5.61E-05  | 1.08E-01 | 2.42E-02 | 3.41E-01 | 9.48E-01 | 1.22E-03 | 1.33E-04 |
| 98.97546  | 100.74 | 18.40 | 16.01 | 15.59 | 16.27 | 1.80E-45  | 3.65E-14 | 3.65E-14 | 3.67E-14 | 6.19E-02 | 4.22E-01 | 5.28E-04 |
| 98.98421  | 139.2  | 24.49 | 26.27 | 26.11 | 26.10 | 9.14E-11  | 4.25E-09 | 6.60E-08 | 2.20E-07 | 9.46E-01 | 9.45E-01 | 1.00E+00 |
| 98.99468  | 259.69 | 18.15 | 14.89 | 15.01 | 15.65 | 4.38E-48  | 3.65E-14 | 3.65E-14 | 3.65E-14 | 9.35E-01 | 1.16E-03 | 7.60E-03 |
| 98.99834  | 93.75  | 15.24 | 16.22 | 16.33 | 16.29 | 1.03E-04  | 2.13E-03 | 4.47E-04 | 1.24E-03 | 9.82E-01 | 9.95E-01 | 9.99E-01 |
| 99.00407  | 36.12  | 16.74 | 11.36 | 11.92 | 12.47 | 4.11E-75  | 3.65E-14 | 3.65E-14 | 3.65E-14 | 4.15E-02 | 4.05E-06 | 5.33E-02 |
| 99.00981  | 50.21  | 19.80 | 13.80 | 13.29 | 15.44 | 5.63E-52  | 3.65E-14 | 3.65E-14 | 3.74E-14 | 4.82E-01 | 6.08E-05 | 6.32E-08 |
| 99.01346  | 284.91 | 19.78 | 16.29 | 15.97 | 17.21 | 1.32E-37  | 3.65E-14 | 3.65E-14 | 7.45E-14 | 6.29E-01 | 5.16E-03 | 5.20E-05 |
| 99.04404  | 283.32 | 20.41 | 20.01 | 19.60 | 19.76 | 6.56E-02  | 5.86E-01 | 5.17E-02 | 1.95E-01 | 5.92E-01 | 8.83E-01 | 9.63E-01 |
| 99.05528  | 195.01 | 17.57 | 14.80 | 15.22 | 15.72 | 7.75E-39  | 3.65E-14 | 3.65E-14 | 7.24E-14 | 9.84E-02 | 1.27E-05 | 4.21E-02 |
| 99.06341  | 217.39 | 16.24 | 13.70 | 14.21 | 14.47 | 1.58E-34  | 3.65E-14 | 4.34E-14 | 7.42E-14 | 2.43E-02 | 2.75E-04 | 4.99E-01 |
| 99.08056  | 169.81 | 16.65 | 14.00 | 13.86 | 14.90 | 6.17E-35  | 3.65E-14 | 3.65E-14 | 1.08E-13 | 9.10E-02 | 2.31E-04 | 1.22E-05 |
| 99.09166  | 29.72  | 16.68 | 15.96 | 15.94 | 15.69 | 2.54E-02  | 1.40E-01 | 1.15E-01 | 2.28E-02 | 1.00E+00 | 8.74E-01 | 8.99E-01 |
| 99.0917   | 206.57 | 15.99 | 13.43 | 13.42 | 14.19 | 1.10E-26  | 5.61E-14 | 5.12E-14 | 3.95E-12 | 1.00E+00 | 1.21E-02 | 9.32E-03 |
| 99.49557  | 101.81 | 18.81 | 16.79 | 17.81 | 16.93 | 1.29E-23  | 6.63E-14 | 1.19E-06 | 7.27E-14 | 2.05E-06 | 8.99E-01 | 8.80E-05 |
| 99.51222  | 160.39 | 20.88 | 20.54 | 19.49 | 20.74 | 8.41E-02  | 9.38E-01 | 7.69E-02 | 9.95E-01 | 2.91E-01 | 9.89E-01 | 1.74E-01 |
| 99.53108  | 272.39 | 20.99 | 19.38 | 18.74 | 19.66 | 7.05E-15  | 1.45E-08 | 7.74E-14 | 7.11E-06 | 7.33E-02 | 7.29E-01 | 4.12E-03 |
| 99.95925  | 30.03  | 19.10 | 18.04 | 18.92 | 18.05 | 1.08E-12  | 2.46E-09 | 6.78E-01 | 1.12E-08 | 1.60E-06 | 1.00E+00 | 4.92E-06 |
| 99.97992  | 91.57  | 16.90 | 18.38 | 19.28 | 18.88 | 1.20E-26  | 9.14E-12 | 3.79E-14 | 7.49E-14 | 8.20E-05 | 7.99E-02 | 2.25E-01 |
| 99.98737  | 264.46 | 15.95 | 7.22  | 7.50  | 9.05  | 1.78E-36  | 3.65E-14 | 3.65E-14 | 6.65E-14 | 9.72E-01 | 3.25E-02 | 9.10E-02 |
| 99.99046  | 132.96 | 10.94 | 13.48 | 14.05 | 13.90 | 1.02E-30  | 7.41E-14 | 3.70E-14 | 4.67E-14 | 1.21E-01 | 3.97E-01 | 9.37E-01 |
| 100.01119 | 43.3   | 21.73 | 19.54 | 20.46 | 19.61 | 9.42E-24  | 6.96E-14 | 1.32E-08 | 7.43E-14 | 1.33E-04 | 9.91E-01 | 6.56E-04 |
| 100.01389 | 269.17 | 19.40 | 16.04 | 15.28 | 17.72 | 1.11E-46  | 3.65E-14 | 3.65E-14 | 1.18E-10 | 8.50E-03 | 4.36E-10 | 7.47E-14 |
| 100.0139  | 174.75 | 18.59 | 15.53 | 15.03 | 17.29 | 1.07E-28  | 7.16E-14 | 3.74E-14 | 1.31E-04 | 3.37E-01 | 2.96E-07 | 2.51E-11 |
| 100.02159 | 52.71  | 17.88 | 18.16 | 17.76 | 17.75 | 5.37E-01  | 7.97E-01 | 9.77E-01 | 9.71E-01 | 5.73E-01 | 5.68E-01 | 1.00E+00 |
| 100.0244  | 94.6   | 21.41 | 21.63 | 22.17 | 21.70 | 2.62E-03  | 6.98E-01 | 1.07E-03 | 5.16E-01 | 4.70E-02 | 9.90E-01 | 1.16E-01 |
| 100.02871 | 273.38 | 19.31 | 16.69 | 16.64 | 17.18 | 7.67E-35  | 3.65E-14 | 3.65E-14 | 7.15E-14 | 9.95E-01 | 1.02E-01 | 5.54E-02 |
| 100.02875 | 145.46 | 18.59 | 15.82 | 15.73 | 16.06 | 3.71E-37  | 3.65E-14 | 3.65E-14 | 3.94E-14 | 9.74E-01 | 7.04E-01 | 4.39E-01 |
| 100.03279 | 266.7  | 16.76 | 14.07 | 14.51 | 15.18 | 1.58E-27  | 3.74E-14 | 7.23E-14 | 1.55E-10 | 1.99E-01 | 1.68E-05 | 2.02E-02 |
| 100.03929 | 290.94 | 17.97 | 16.91 | 16.80 | 16.87 | 1.85E-09  | 1.14E-06 | 4.76E-08 | 8.34E-07 | 9.46E-01 | 9.97E-01 | 9.86E-01 |
| 100.04742 | 213.09 | 16.24 | 13.51 | 13.76 | 14.26 | 5.44E-41  | 3.65E-14 | 3.65E-14 | 5.67E-14 | 5.06E-01 | 4.47E-04 | 3.68E-02 |
| 100.05055 | 199.45 | 16.70 | 13.18 | 13.40 | 13.92 | 1.44E-47  | 3.65E-14 | 3.65E-14 | 3.65E-14 | 7.20E-01 | 4.00E-03 | 7.38E-02 |
| 100.07571 | 218.21 | 20.24 | 17.75 | 18.22 | 19.32 | 4.57E-13  | 3.30E-12 | 1.08E-08 | 3.33E-02 | 4.89E-01 | 4.41E-05 | 7.40E-03 |
| 100.11209 | 159.05 | 18.92 | 20.28 | 20.69 | 20.65 | 4.72E-11  | 4.93E-06 | 1.20E-09 | 1.03E-08 | 4.40E-01 | 5.63E-01 | 9.99E-01 |
| 100.49867 | 88.69  | 19.99 | 20.30 | 20.49 | 19.83 | 2.05E-01  | 7.76E-01 | 4.08E-01 | 9.60E-01 | 9.41E-01 | 5.12E-01 | 2.10E-01 |
| 100.50993 | 272.1  | 21.02 | 19.19 | 18.56 | 19.18 | 4.73E-07  | 3.04E-04 | 3.88E-07 | 4.18E-04 | 5.11E-01 | 1.00E+00 | 5.49E-01 |
| 100.51282 | 39.14  | 17.66 | 14.11 | 15.43 | 14.46 | 7.04E-28  | 3.83E-14 | 3.00E-12 | 6.61E-14 | 8.65E-05 | 6.69E-01 | 9.11E-03 |
| 100.52083 | 34.84  | 13.93 | 11.11 | 14.27 | 14.48 | 2.62E-19  | 3.30E-13 | 7.63E-01 | 4.20E-01 | 7.61E-14 | 7.54E-14 | 9.39E-01 |
| 100.52646 | 35.58  | 16.83 | 15.29 | 17.42 | 16.05 | 1.60E-14  | 1.33E-08 | 7.66E-02 | 1.30E-02 | 1.04E-13 | 2.00E-02 | 1.86E-06 |
| 100.91697 | 48.78  | 16.73 | 16.84 | 16.93 | 16.97 | 2.51E-01  | 7.99E-01 | 3.87E-01 | 2.42E-01 | 9.16E-01 | 7.74E-01 | 9.87E-01 |
| 100.9568  | 268.94 | 19.30 | 16.30 | 15.44 | 17.59 | 3.94E-27  | 7.49E-14 | 3.72E-14 | 1.60E-06 | 3.95E-02 | 8.08E-04 | 2.83E-09 |
| 100.96707 | 23.59  | 16.15 | 15.16 | 16.58 | 15.40 | 3.32E-10  | 3.63E-05 | 1.82E-01 | 4.09E-03 | 3.51E-09 | 7.16E-01 | 2.07E-06 |
| 100.98211 | 87.27  | 18.53 | 18.29 | 18.62 | 17.95 | 1.69E-01  | 8.59E-01 | 9.93E-01 | 2.47E-01 | 7.30E-01 | 7.14E-01 | 1.64E-01 |

|           |        |       |       |       |       |          |          |          |          |          |          |          |
|-----------|--------|-------|-------|-------|-------|----------|----------|----------|----------|----------|----------|----------|
| 100.98848 | 194.33 | 17.04 | 19.41 | 19.87 | 17.14 | 3.39E-10 | 1.32E-05 | 9.55E-08 | 9.97E-01 | 7.89E-01 | 9.83E-05 | 1.34E-06 |
| 100.99112 | 30.7   | 14.37 | 13.41 | 15.86 | 14.88 | 9.51E-12 | 1.05E-02 | 1.17E-05 | 3.77E-01 | 1.67E-12 | 6.02E-05 | 1.40E-02 |
| 101.00728 | 98.16  | 17.98 | 15.49 | 15.19 | 15.59 | 3.06E-30 | 5.85E-14 | 3.72E-14 | 7.07E-14 | 5.61E-01 | 9.79E-01 | 3.40E-01 |
| 101.01162 | 165.35 | 17.17 | 14.12 | 13.64 | 15.45 | 1.80E-21 | 7.49E-14 | 7.21E-14 | 1.24E-05 | 5.07E-01 | 1.93E-03 | 6.17E-06 |
| 101.02337 | 201.09 | 15.84 | 10.56 | 11.69 | 12.07 | 2.89E-48 | 3.65E-14 | 3.65E-14 | 3.65E-14 | 7.83E-04 | 6.66E-06 | 5.87E-01 |
| 101.02476 | 255.96 | 17.27 | 15.71 | 15.05 | 15.65 | 2.96E-18 | 5.85E-10 | 7.48E-14 | 3.24E-10 | 2.63E-02 | 9.93E-01 | 6.50E-02 |
| 101.02511 | 55.26  | 18.90 | 20.29 | 20.25 | 20.05 | 3.08E-15 | 1.27E-12 | 2.46E-12 | 6.86E-09 | 9.98E-01 | 6.07E-01 | 7.10E-01 |
| 101.03457 | 203.74 | 16.85 | 13.84 | 14.20 | 14.59 | 3.50E-48 | 3.65E-14 | 3.65E-14 | 3.65E-14 | 1.64E-01 | 2.32E-04 | 1.26E-01 |
| 101.06016 | 277    | 18.21 | 16.00 | 15.85 | 16.86 | 1.01E-10 | 1.60E-08 | 1.02E-09 | 1.60E-03 | 9.75E-01 | 1.05E-01 | 3.58E-02 |
| 101.07099 | 156.99 | 16.92 | 18.94 | 16.44 | 18.82 | 1.21E-17 | 1.38E-09 | 3.81E-01 | 2.97E-08 | 4.06E-13 | 9.82E-01 | 1.17E-11 |
| 101.071   | 87.96  | 21.95 | 21.95 | 22.25 | 21.80 | 9.66E-07 | 1.00E+00 | 6.67E-04 | 2.19E-01 | 8.37E-04 | 2.75E-01 | 4.02E-07 |
| 101.07909 | 176.53 | 16.68 | 13.60 | 14.59 | 14.64 | 4.20E-44 | 3.65E-14 | 3.72E-14 | 4.43E-14 | 3.18E-07 | 1.72E-07 | 9.90E-01 |
| 101.10739 | 76.32  | 14.76 | 14.82 | 15.09 | 14.90 | 8.70E-01 | 9.99E-01 | 8.53E-01 | 9.87E-01 | 9.16E-01 | 9.97E-01 | 9.73E-01 |
| 101.11548 | 188.21 | 15.09 | 13.58 | 13.98 | 14.34 | 1.48E-06 | 7.30E-07 | 4.03E-04 | 4.17E-02 | 4.89E-01 | 5.01E-02 | 6.11E-01 |
| 101.49659 | 109.1  | 16.01 | 14.31 | 14.51 | 14.31 | 1.56E-08 | 4.85E-07 | 1.01E-05 | 1.07E-06 | 9.11E-01 | 1.00E+00 | 9.22E-01 |
| 101.50873 | 265.59 | 19.29 | 15.69 | 15.32 | 17.35 | 5.06E-37 | 3.65E-14 | 3.65E-14 | 3.43E-10 | 5.52E-01 | 1.87E-07 | 1.19E-10 |
| 101.50875 | 148.98 | 18.28 | 15.14 | 14.96 | 17.36 | 1.80E-41 | 3.65E-14 | 3.65E-14 | 5.16E-04 | 8.59E-01 | 7.34E-14 | 7.25E-14 |
| 101.51408 | 85.07  | 15.12 | 13.95 | 13.61 | 14.48 | 6.23E-02 | 1.98E-01 | 5.03E-02 | 7.22E-01 | 9.42E-01 | 8.27E-01 | 4.90E-01 |
| 101.51807 | 25.05  | 12.97 | 14.96 | 15.86 | 14.86 | 3.02E-14 | 9.79E-08 | 8.49E-14 | 9.89E-07 | 5.22E-02 | 9.91E-01 | 2.76E-02 |
| 101.977   | 87.82  | 15.73 | 15.76 | 16.58 | 16.70 | 1.37E-07 | 9.97E-01 | 1.32E-04 | 2.08E-05 | 5.00E-04 | 8.73E-05 | 9.42E-01 |
| 101.98426 | 257.29 | 18.85 | 15.55 | 15.90 | 16.42 | 8.36E-38 | 3.65E-14 | 3.65E-14 | 6.81E-14 | 4.36E-01 | 1.66E-03 | 1.15E-01 |
| 102.007   | 91.4   | 16.68 | 18.17 | 18.98 | 17.85 | 1.26E-13 | 7.72E-07 | 9.38E-14 | 2.46E-04 | 2.16E-02 | 6.88E-01 | 6.38E-04 |
| 102.013   | 301.39 | 18.34 | 17.18 | 16.31 | 17.67 | 5.31E-20 | 4.73E-08 | 6.85E-14 | 4.78E-03 | 9.28E-05 | 8.08E-02 | 8.99E-10 |
| 102.02168 | 96.22  | 19.08 | 18.87 | 19.56 | 19.13 | 1.94E-05 | 3.99E-01 | 2.29E-03 | 9.89E-01 | 6.87E-06 | 2.81E-01 | 1.26E-02 |
| 102.03387 | 173.18 | 22.41 | 21.16 | 20.32 | 21.60 | 5.20E-11 | 8.83E-05 | 8.27E-12 | 2.86E-02 | 1.83E-02 | 4.57E-01 | 1.16E-04 |
| 102.03724 | 41.65  | 14.68 | 14.71 | 14.57 | 15.36 | 4.38E-02 | 1.00E+00 | 9.79E-01 | 9.34E-02 | 9.63E-01 | 1.37E-01 | 4.22E-02 |
| 102.04589 | 66.89  | 20.06 | 19.22 | 19.52 | 19.54 | 2.35E-14 | 7.89E-14 | 3.57E-07 | 2.08E-06 | 1.25E-02 | 1.05E-02 | 9.99E-01 |
| 102.05502 | 75.47  | 24.65 | 25.13 | 24.83 | 24.80 | 3.92E-07 | 7.06E-08 | 1.02E-01 | 2.51E-01 | 2.49E-03 | 1.07E-03 | 9.85E-01 |
| 102.07436 | 69.01  | 17.12 | 16.44 | 16.58 | 16.67 | 1.23E-10 | 1.90E-10 | 3.26E-07 | 5.47E-05 | 5.11E-01 | 1.25E-01 | 8.18E-01 |
| 102.09143 | 65.47  | 21.62 | 21.55 | 22.17 | 21.76 | 6.63E-09 | 8.92E-01 | 3.32E-07 | 5.51E-01 | 2.30E-08 | 2.09E-01 | 4.66E-04 |
| 102.10441 | 75.74  | 15.61 | 15.17 | 15.01 | 15.23 | 3.24E-04 | 1.16E-02 | 1.60E-04 | 5.08E-02 | 6.81E-01 | 9.74E-01 | 4.29E-01 |
| 102.12778 | 148.2  | 17.22 | 19.39 | 20.33 | 19.81 | 5.72E-09 | 1.20E-04 | 8.89E-09 | 4.96E-06 | 2.51E-01 | 8.52E-01 | 7.51E-01 |
| 102.50908 | 275.72 | 19.29 | 17.29 | 17.50 | 17.15 | 1.05E-19 | 7.72E-14 | 8.28E-13 | 7.43E-14 | 8.05E-01 | 9.48E-01 | 4.84E-01 |
| 102.51263 | 65.59  | 16.61 | 15.11 | 15.02 | 15.33 | 3.14E-07 | 1.02E-05 | 1.88E-06 | 3.52E-04 | 9.90E-01 | 9.05E-01 | 7.61E-01 |
| 102.52192 | 98.8   | 17.56 | 14.85 | 14.71 | 15.27 | 1.73E-31 | 3.92E-14 | 3.67E-14 | 7.49E-14 | 9.38E-01 | 2.94E-01 | 9.15E-02 |
| 102.53553 | 145.86 | 19.59 | 16.16 | 15.95 | 16.93 | 5.09E-40 | 3.65E-14 | 3.65E-14 | 6.58E-14 | 8.28E-01 | 1.56E-02 | 8.40E-04 |
| 102.91147 | 273.1  | 15.52 | 12.07 | 12.97 | 14.23 | 3.09E-11 | 3.93E-11 | 9.14E-07 | 4.16E-02 | 2.56E-01 | 1.64E-04 | 6.00E-02 |
| 102.92564 | 273.98 | 17.98 | 16.25 | 16.77 | 17.08 | 1.92E-12 | 6.88E-13 | 3.59E-07 | 4.34E-04 | 9.55E-02 | 2.32E-03 | 5.33E-01 |
| 102.97029 | 276.25 | 20.95 | 18.14 | 18.08 | 18.91 | 1.42E-11 | 1.42E-09 | 4.66E-10 | 2.74E-05 | 9.99E-01 | 3.15E-01 | 2.49E-01 |
| 102.98941 | 147.99 | 16.83 | 15.06 | 15.05 | 15.45 | 6.64E-25 | 6.94E-14 | 6.61E-14 | 4.67E-13 | 1.00E+00 | 1.26E-01 | 1.09E-01 |
| 103.0014  | 88.53  | 20.08 | 20.53 | 20.88 | 19.91 | 3.13E-02 | 5.50E-01 | 9.09E-02 | 9.62E-01 | 7.62E-01 | 3.15E-01 | 3.83E-02 |
| 103.01498 | 88.04  | 15.95 | 15.75 | 16.12 | 15.73 | 1.63E-01 | 7.14E-01 | 8.08E-01 | 6.61E-01 | 2.31E-01 | 1.00E+00 | 2.05E-01 |
| 103.03908 | 66.36  | 21.45 | 21.27 | 21.87 | 21.45 | 1.85E-06 | 3.62E-01 | 5.64E-04 | 1.00E+00 | 8.71E-07 | 4.24E-01 | 1.23E-03 |
| 103.04993 | 40.03  | 16.67 | 14.09 | 14.71 | 14.95 | 1.20E-20 | 7.18E-14 | 4.05E-13 | 6.45E-10 | 7.25E-02 | 6.00E-03 | 7.75E-01 |
| 103.05207 | 63.21  | 16.39 | 15.09 | 15.02 | 15.03 | 7.73E-23 | 7.48E-14 | 7.56E-14 | 7.43E-14 | 9.68E-01 | 9.72E-01 | 1.00E+00 |
| 103.05437 | 49.08  | 22.11 | 21.22 | 21.61 | 21.49 | 1.33E-18 | 7.23E-14 | 1.53E-07 | 3.96E-10 | 1.71E-04 | 2.26E-02 | 5.89E-01 |
| 103.05835 | 74.11  | 20.00 | 20.41 | 20.44 | 20.04 | 2.16E-07 | 6.20E-05 | 1.74E-05 | 9.61E-01 | 9.95E-01 | 1.14E-03 | 4.17E-04 |
| 103.06134 | 62.5   | 14.82 | 13.59 | 14.06 | 13.69 | 6.59E-04 | 9.41E-04 | 8.14E-02 | 3.93E-03 | 4.83E-01 | 9.91E-01 | 6.90E-01 |
| 103.07662 | 175.49 | 16.82 | 14.28 | 14.71 | 14.27 | 4.46E-29 | 4.30E-14 | 7.49E-14 | 4.72E-14 | 2.22E-01 | 1.00E+00 | 2.10E-01 |
| 103.09486 | 43     | 17.30 | 15.26 | 15.98 | 16.08 | 1.90E-24 | 3.87E-14 | 9.42E-13 | 1.45E-10 | 2.77E-04 | 4.87E-05 | 9.45E-01 |
| 103.13111 | 172.41 | 12.78 | 14.48 | 14.37 | 14.10 | 2.25E-05 | 7.64E-05 | 2.12E-04 | 4.86E-03 | 9.92E-01 | 7.81E-01 | 9.04E-01 |
| 103.50306 | 110.6  | 16.50 | 14.57 | 14.73 | 14.50 | 1.16E-13 | 1.12E-10 | 2.58E-09 | 7.59E-11 | 9.34E-01 | 9.95E-01 | 8.44E-01 |
| 103.50755 | 277.73 | 18.76 | 16.48 | 16.79 | 16.58 | 1.63E-26 | 5.70E-14 | 7.43E-14 | 7.13E-14 | 4.53E-01 | 9.71E-01 | 7.51E-01 |
| 103.51556 | 90.13  | 16.07 | 15.06 | 14.87 | 14.94 | 1.21E-03 | 1.69E-02 | 2.54E-03 | 7.44E-03 | 9.50E-01 | 9.88E-01 | 9.98E-01 |
| 103.52044 | 276.03 | 19.14 | 14.65 | 15.18 | 16.12 | 1.42E-51 | 3.65E-14 | 3.65E-14 | 3.70E-14 | 1.25E-01 | 8.20E-08 | 1.08E-03 |
| 103.53844 | 74.71  | 14.93 | 16.26 | 16.06 | 15.46 | 3.13E-04 | 4.61E-04 | 3.71E-03 | 3.99E-01 | 9.36E-01 | 1.07E-01 | 3.14E-01 |
| 103.79251 | 34.13  | 16.69 | 14.32 | 15.49 | 15.38 | 9.79E-17 | 7.36E-14 | 7.59E-06 | 2.33E-06 | 2.87E-05 | 3.08E-04 | 9.76E-01 |
| 103.92028 | 32.4   | 15.11 | 15.28 | 13.11 | 13.56 | 9.69E-12 | 9.56E-01 | 2.65E-08 | 4.44E-05 | 5.18E-09 | 9.57E-06 | 5.76E-01 |
| 103.9556  | 180.88 | 18.14 | 17.55 | 19.11 | 20.31 | 1.94E-04 | 7.65E-01 | 3.86E-01 | 3.52E-03 | 6.46E-02 | 1.64E-04 | 2.36E-01 |
| 103.99932 | 107.84 | 16.03 | 15.22 | 14.64 | 14.99 | 2.38E-04 | 6.13E-02 | 1.18E-04 | 9.63E-03 | 2.94E-01 | 8.99E-01 | 7.38E-01 |
| 104.00866 | 300.29 | 17.78 | 16.27 | 15.31 | 17.12 | 8.42E-24 | 1.70E-10 | 4.47E-14 | 1.60E-02 | 1.31E-04 | 1.45E-03 | 5.63E-13 |
| 104.01767 | 85.22  | 19.25 | 21.68 | 21.74 | 21.28 | 1.55E-21 | 7.43E-14 | 7.47E-14 | 3.17E-12 | 9.95E-01 | 4.47E-01 | 3.10E-01 |
| 104.0303  | 173.09 | 17.62 | 14.09 | 13.90 | 14.97 | 4.91E-49 | 3.65E-14 | 3.65E-14 | 3.74E-14 | 8.03E-01 | 5.77E-04 | 1.22E-05 |
| 104.03762 | 34.55  | 17.00 | 15.12 | 15.40 | 15.92 | 2.29E-15 | 9.20E-14 | 3.26E-11 | 1.84E-05 | 5.88E-01 | 4.38E-03 | 1.27E-01 |
| 104.04213 | 38.9   | 17.11 | 15.08 | 16.45 | 16.47 | 1.13E-16 | 7.43E-14 | 1.05E-02 | 1.88E-02 | 9.26E-09 | 1.82E-08 | 1.00E+00 |
| 104.04954 | 39.72  | 15.37 | 9.32  | 9.62  | 10.39 | 2.83E-32 | 3.67E-14 | 3.76E-14 | 7.29E-14 | 9.26E-01 | 1.47E-01 | 4.14E-01 |
| 104.05301 | 56.14  | 20.90 | 19.72 | 20.53 | 20.05 | 8.84E-20 | 7.34E-14 | 7.20E-03 | 1.15E-10 | 9.58E-10 | 4.00E-02 | 8.81E-04 |
| 104.06634 | 34.42  | 17.54 | 15.97 | 16.46 | 16.87 | 1.04E-07 | 4.09E-08 | 2.24E-04 | 6.21E-02 | 2.65E-01 | 6.85E-03 | 4.29E-01 |

|           |        |       |       |       |       |          |          |          |          |          |          |          |
|-----------|--------|-------|-------|-------|-------|----------|----------|----------|----------|----------|----------|----------|
| 104.09412 | 34.01  | 19.21 | 18.17 | 18.65 | 18.59 | 1.53E-18 | 7.25E-14 | 5.17E-07 | 4.62E-08 | 2.87E-05 | 7.56E-04 | 9.17E-01 |
| 104.10702 | 43.44  | 30.48 | 30.00 | 29.95 | 30.46 | 1.09E-24 | 7.87E-14 | 7.41E-14 | 9.58E-01 | 8.03E-01 | 2.18E-12 | 8.00E-14 |
| 104.11051 | 37.89  | 17.96 | 16.83 | 17.52 | 17.24 | 1.77E-03 | 7.65E-04 | 4.16E-01 | 7.67E-02 | 9.91E-02 | 5.46E-01 | 7.98E-01 |
| 104.146   | 34.42  | 19.12 | 17.93 | 18.23 | 18.40 | 1.04E-12 | 8.54E-13 | 5.07E-08 | 3.01E-05 | 2.22E-01 | 1.95E-02 | 7.02E-01 |
| 104.17198 | 34.84  | 17.08 | 14.13 | 14.84 | 15.81 | 4.08E-18 | 7.43E-14 | 2.15E-11 | 4.49E-04 | 1.05E-01 | 2.80E-06 | 1.55E-02 |
| 104.17662 | 34.66  | 17.06 | 14.69 | 15.39 | 15.69 | 2.36E-15 | 7.47E-14 | 6.46E-09 | 5.69E-06 | 5.08E-02 | 2.45E-03 | 7.01E-01 |
| 104.42297 | 34.39  | 16.97 | 15.17 | 15.73 | 15.96 | 4.78E-14 | 8.80E-14 | 7.09E-08 | 2.92E-05 | 4.69E-02 | 2.80E-03 | 7.42E-01 |
| 104.49394 | 258.57 | 17.06 | 14.45 | 14.63 | 15.07 | 1.71E-28 | 3.94E-14 | 5.30E-14 | 7.45E-14 | 8.59E-01 | 4.01E-02 | 2.21E-01 |
| 104.50695 | 280.81 | 18.26 | 15.84 | 16.11 | 15.93 | 1.07E-25 | 6.43E-14 | 7.45E-14 | 7.41E-14 | 6.28E-01 | 9.80E-01 | 8.64E-01 |
| 104.51828 | 84.54  | 15.26 | 18.17 | 18.27 | 17.66 | 1.41E-17 | 1.32E-13 | 7.95E-14 | 1.05E-09 | 9.91E-01 | 5.22E-01 | 3.46E-01 |
| 104.5264  | 85.01  | 16.77 | 17.17 | 17.56 | 17.39 | 1.14E-08 | 1.09E-02 | 7.67E-09 | 1.95E-05 | 1.22E-02 | 3.37E-01 | 5.54E-01 |
| 104.90779 | 279.25 | 19.93 | 17.65 | 18.19 | 17.58 | 1.43E-18 | 7.80E-14 | 7.17E-10 | 7.67E-14 | 1.78E-01 | 9.94E-01 | 1.16E-01 |
| 104.90784 | 118.8  | 17.87 | 16.41 | 16.76 | 15.83 | 2.58E-14 | 1.49E-08 | 2.03E-05 | 9.18E-14 | 4.61E-01 | 8.35E-02 | 9.55E-04 |
| 104.95512 | 269.71 | 17.07 | 14.44 | 14.76 | 14.87 | 3.97E-17 | 7.90E-14 | 2.50E-12 | 9.93E-11 | 7.28E-01 | 5.40E-01 | 9.87E-01 |
| 104.99291 | 39.46  | 18.60 | 17.32 | 16.69 | 16.16 | 8.25E-14 | 1.19E-04 | 2.20E-09 | 2.77E-13 | 1.57E-01 | 1.26E-03 | 3.05E-01 |
| 104.9978  | 98.55  | 14.25 | 13.75 | 12.28 | 14.51 | 7.22E-07 | 6.04E-01 | 1.04E-05 | 9.27E-01 | 2.71E-03 | 2.93E-01 | 2.28E-06 |
| 105.00051 | 55.01  | 17.51 | 14.43 | 14.79 | 15.39 | 2.23E-16 | 8.09E-14 | 2.24E-12 | 1.17E-07 | 7.57E-01 | 5.63E-02 | 3.80E-01 |
| 105.00335 | 20.03  | 12.83 | 17.48 | 17.33 | 17.49 | 1.02E-86 | 3.65E-14 | 3.65E-14 | 3.65E-14 | 8.17E-01 | 1.00E+00 | 7.78E-01 |
| 105.01666 | 84.77  | 16.46 | 18.37 | 18.45 | 18.20 | 1.59E-30 | 4.39E-14 | 3.76E-14 | 7.09E-14 | 9.68E-01 | 7.71E-01 | 4.91E-01 |
| 105.0335  | 275.63 | 17.60 | 16.74 | 15.54 | 15.81 | 6.28E-20 | 4.26E-04 | 7.43E-14 | 1.72E-13 | 4.78E-07 | 2.63E-04 | 6.15E-01 |
| 105.04463 | 33.14  | 20.22 | 19.49 | 19.67 | 19.63 | 2.56E-12 | 9.92E-12 | 2.25E-07 | 7.97E-08 | 2.78E-01 | 5.31E-01 | 9.80E-01 |
| 105.05642 | 44.12  | 16.65 | 14.17 | 15.27 | 14.52 | 2.09E-10 | 5.39E-10 | 9.97E-04 | 2.15E-07 | 1.79E-02 | 8.06E-01 | 1.98E-01 |
| 105.06507 | 181.3  | 15.88 | 14.01 | 14.61 | 13.52 | 1.11E-11 | 5.08E-08 | 3.41E-04 | 2.35E-11 | 2.38E-01 | 4.61E-01 | 5.87E-03 |
| 105.06784 | 101.94 | 14.94 | 14.07 | 14.45 | 14.33 | 2.64E-02 | 1.57E-02 | 3.18E-01 | 1.63E-01 | 5.81E-01 | 8.44E-01 | 9.76E-01 |
| 105.06992 | 174.53 | 18.32 | 17.58 | 17.90 | 17.69 | 1.45E-03 | 1.34E-03 | 1.46E-01 | 1.15E-02 | 3.89E-01 | 9.54E-01 | 7.37E-01 |
| 105.074   | 187.78 | 17.76 | 14.22 | 14.06 | 14.99 | 4.14E-46 | 3.65E-14 | 3.65E-14 | 3.76E-14 | 9.00E-01 | 6.61E-03 | 5.36E-04 |
| 105.10403 | 38.4   | 25.65 | 25.32 | 25.54 | 25.19 | 2.62E-02 | 1.68E-01 | 9.06E-01 | 2.86E-02 | 5.24E-01 | 8.73E-01 | 1.58E-01 |
| 105.11027 | 41.58  | 26.49 | 25.90 | 26.19 | 26.29 | 6.43E-10 | 9.40E-11 | 2.17E-03 | 1.08E-01 | 3.63E-03 | 6.04E-05 | 6.39E-01 |
| 105.11305 | 39.81  | 21.26 | 20.88 | 21.30 | 21.08 | 7.45E-07 | 1.15E-05 | 9.73E-01 | 1.23E-01 | 2.80E-06 | 6.67E-02 | 5.25E-02 |
| 105.49209 | 275.33 | 20.32 | 18.35 | 17.90 | 18.27 | 9.50E-17 | 1.06E-10 | 7.74E-14 | 6.09E-11 | 3.88E-01 | 9.93E-01 | 5.77E-01 |
| 105.49211 | 166.33 | 19.47 | 18.04 | 18.00 | 17.94 | 5.38E-22 | 7.54E-14 | 7.56E-14 | 7.47E-14 | 9.94E-01 | 9.22E-01 | 9.79E-01 |
| 105.95376 | 23     | 19.19 | 17.95 | 18.30 | 18.59 | 3.23E-26 | 3.72E-14 | 7.58E-14 | 1.50E-07 | 3.22E-03 | 2.52E-08 | 3.11E-02 |
| 105.9538  | 190.18 | 18.16 | 19.88 | 20.13 | 18.88 | 4.55E-15 | 1.28E-10 | 2.51E-13 | 2.32E-02 | 7.61E-01 | 7.74E-04 | 1.24E-05 |
| 105.96297 | 296.04 | 17.45 | 14.98 | 15.13 | 15.03 | 1.85E-19 | 7.46E-14 | 1.11E-13 | 1.01E-13 | 9.50E-01 | 9.98E-01 | 9.86E-01 |
| 105.97799 | 194.95 | 11.09 | 14.43 | 14.24 | 15.13 | 2.36E-13 | 4.09E-09 | 2.12E-08 | 4.55E-12 | 9.85E-01 | 5.71E-01 | 3.57E-01 |
| 105.99568 | 56.06  | 16.17 | 12.86 | 12.88 | 12.74 | 6.48E-23 | 7.41E-14 | 7.29E-14 | 7.56E-14 | 1.00E+00 | 9.90E-01 | 9.82E-01 |
| 106.00388 | 52.35  | 17.64 | 15.79 | 16.08 | 15.21 | 5.45E-13 | 2.38E-08 | 2.50E-06 | 1.02E-12 | 7.83E-01 | 2.58E-01 | 3.06E-02 |
| 106.0105  | 37.71  | 16.37 | 14.52 | 16.55 | 15.56 | 3.18E-10 | 2.85E-08 | 9.25E-01 | 4.95E-02 | 2.34E-09 | 7.36E-03 | 1.10E-02 |
| 106.02317 | 261.23 | 18.66 | 14.67 | 14.59 | 15.63 | 2.66E-54 | 3.65E-14 | 3.65E-14 | 3.65E-14 | 9.83E-01 | 2.03E-04 | 3.80E-05 |
| 106.02868 | 31.26  | 18.70 | 17.74 | 17.94 | 17.99 | 5.97E-18 | 7.45E-14 | 8.44E-12 | 8.26E-10 | 2.21E-01 | 8.75E-02 | 9.58E-01 |
| 106.02878 | 170.7  | 16.87 | 14.19 | 14.77 | 14.97 | 2.39E-42 | 3.65E-14 | 3.65E-14 | 4.32E-14 | 2.63E-03 | 3.97E-05 | 6.35E-01 |
| 106.03683 | 28.59  | 14.55 | 16.32 | 11.26 | 11.68 | 2.57E-68 | 1.12E-13 | 3.65E-14 | 3.65E-14 | 3.65E-14 | 3.65E-14 | 2.41E-01 |
| 106.04991 | 151.68 | 17.57 | 19.37 | 16.18 | 19.14 | 2.49E-18 | 2.22E-06 | 3.25E-04 | 8.59E-05 | 7.46E-14 | 9.15E-01 | 1.86E-13 |
| 106.04993 | 87.6   | 23.56 | 23.04 | 23.49 | 23.17 | 9.56E-10 | 1.99E-08 | 8.46E-01 | 7.07E-05 | 2.38E-06 | 4.51E-01 | 2.16E-03 |
| 106.06511 | 298.57 | 16.44 | 14.72 | 14.73 | 14.66 | 1.83E-10 | 7.05E-08 | 6.26E-08 | 4.78E-08 | 1.00E+00 | 9.96E-01 | 9.94E-01 |
| 106.06515 | 199.17 | 17.74 | 14.07 | 15.01 | 15.19 | 3.31E-44 | 3.65E-14 | 3.65E-14 | 3.92E-14 | 1.03E-04 | 4.89E-06 | 8.37E-01 |
| 106.06839 | 265.45 | 20.68 | 20.15 | 20.09 | 18.91 | 2.90E-05 | 4.29E-01 | 3.24E-01 | 7.48E-06 | 9.98E-01 | 4.45E-03 | 6.95E-03 |
| 106.0862  | 35.37  | 15.89 | 14.97 | 14.08 | 13.76 | 1.74E-05 | 1.74E-01 | 3.72E-04 | 3.77E-05 | 2.14E-01 | 5.56E-02 | 9.06E-01 |
| 106.08627 | 192.68 | 16.07 | 13.43 | 13.61 | 14.36 | 1.51E-37 | 3.65E-14 | 3.65E-14 | 7.49E-14 | 7.59E-01 | 1.16E-05 | 5.59E-04 |
| 106.10734 | 35.99  | 21.16 | 20.93 | 21.25 | 20.61 | 3.19E-03 | 5.70E-01 | 9.45E-01 | 1.33E-02 | 2.78E-01 | 3.03E-01 | 3.01E-03 |
| 106.11124 | 39.54  | 21.51 | 21.04 | 21.47 | 21.27 | 1.30E-09 | 5.38E-09 | 9.39E-01 | 7.18E-03 | 2.32E-07 | 2.15E-02 | 4.41E-02 |
| 106.11366 | 35.75  | 20.49 | 19.98 | 20.40 | 20.22 | 1.49E-08 | 1.65E-08 | 7.08E-01 | 7.88E-03 | 6.36E-06 | 3.43E-02 | 1.43E-01 |
| 106.52076 | 79.14  | 16.31 | 13.51 | 14.95 | 15.67 | 3.42E-08 | 1.27E-08 | 1.26E-02 | 5.00E-01 | 1.08E-02 | 5.40E-05 | 4.20E-01 |
| 106.9507  | 47.72  | 18.14 | 17.98 | 18.13 | 18.16 | 2.31E-01 | 3.10E-01 | 1.00E+00 | 9.98E-01 | 3.78E-01 | 2.70E-01 | 9.94E-01 |
| 106.96318 | 261.38 | 15.49 | 10.49 | 10.02 | 11.31 | 2.28E-22 | 7.41E-14 | 7.11E-14 | 3.84E-12 | 8.25E-01 | 4.76E-01 | 1.03E-01 |
| 106.99903 | 55.1   | 21.17 | 19.47 | 19.83 | 18.49 | 1.50E-17 | 5.28E-09 | 4.64E-06 | 7.43E-14 | 5.40E-01 | 3.52E-03 | 1.73E-05 |
| 107.01284 | 71.99  | 16.72 | 14.66 | 15.13 | 14.75 | 2.18E-14 | 1.85E-12 | 3.67E-08 | 4.30E-11 | 3.09E-01 | 9.89E-01 | 5.17E-01 |
| 107.03969 | 99.36  | 16.49 | 15.72 | 15.82 | 15.57 | 8.83E-03 | 3.74E-02 | 8.47E-02 | 1.06E-02 | 9.87E-01 | 9.62E-01 | 8.45E-01 |
| 107.04696 | 71.77  | 15.06 | 12.45 | 13.23 | 13.20 | 9.53E-14 | 1.56E-13 | 1.07E-07 | 1.91E-07 | 7.72E-02 | 1.14E-01 | 1.00E+00 |
| 107.04917 | 287.54 | 17.18 | 15.56 | 15.60 | 15.68 | 6.29E-26 | 6.69E-14 | 7.23E-14 | 7.48E-14 | 9.91E-01 | 8.79E-01 | 9.67E-01 |
| 107.05238 | 295.05 | 16.83 | 15.58 | 15.34 | 13.99 | 3.65E-16 | 1.47E-04 | 3.07E-06 | 7.58E-14 | 8.54E-01 | 3.11E-06 | 8.59E-05 |
| 107.0604  | 287.3  | 17.43 | 15.15 | 14.83 | 15.47 | 2.75E-30 | 5.54E-14 | 3.67E-14 | 7.34E-14 | 4.15E-01 | 4.47E-01 | 1.57E-02 |
| 107.06044 | 141.42 | 18.05 | 15.68 | 15.64 | 16.66 | 3.36E-26 | 6.18E-14 | 5.32E-14 | 1.31E-08 | 9.97E-01 | 1.84E-04 | 6.89E-05 |
| 107.06537 | 138.16 | 17.53 | 18.25 | 17.94 | 17.75 | 1.64E-03 | 7.23E-04 | 1.14E-01 | 6.39E-01 | 3.59E-01 | 5.64E-02 | 7.69E-01 |
| 107.0703  | 192.04 | 16.48 | 14.22 | 14.58 | 14.84 | 2.74E-28 | 3.72E-14 | 7.05E-14 | 7.78E-14 | 2.19E-01 | 7.92E-03 | 5.21E-01 |
| 107.08549 | 23.95  | 17.29 | 15.31 | 15.93 | 16.42 | 1.90E-27 | 3.67E-14 | 7.64E-14 | 6.65E-07 | 6.85E-04 | 5.49E-10 | 1.38E-02 |
| 107.08552 | 296.35 | 17.75 | 16.47 | 16.42 | 16.68 | 2.68E-11 | 4.88E-09 | 9.59E-10 | 2.68E-06 | 9.96E-01 | 7.36E-01 | 5.97E-01 |
| 107.47591 | 298.76 | 16.69 | 14.12 | 14.12 | 14.38 | 1.09E-13 | 5.76E-11 | 4.38E-11 | 9.76E-09 | 1.00E+00 | 9.00E-01 | 9.05E-01 |

|           |        |       |       |       |       |          |          |          |          |          |          |          |
|-----------|--------|-------|-------|-------|-------|----------|----------|----------|----------|----------|----------|----------|
| 107.50487 | 34.75  | 14.66 | 15.24 | 17.08 | 14.98 | 4.60E-11 | 3.35E-01 | 8.86E-11 | 8.01E-01 | 2.18E-06 | 8.93E-01 | 1.15E-07 |
| 107.52861 | 75.29  | 16.57 | 11.54 | 13.65 | 14.91 | 1.59E-20 | 6.43E-14 | 9.24E-09 | 3.49E-03 | 9.18E-05 | 5.49E-10 | 5.42E-02 |
| 107.53648 | 85.96  | 16.09 | 18.22 | 18.16 | 17.63 | 4.72E-12 | 2.34E-10 | 4.94E-10 | 1.18E-05 | 9.98E-01 | 2.59E-01 | 3.44E-01 |
| 107.56705 | 130.38 | 13.54 | 13.25 | 13.73 | 13.43 | 4.04E-01 | 7.22E-01 | 9.02E-01 | 9.78E-01 | 3.33E-01 | 9.32E-01 | 7.26E-01 |
| 107.95045 | 287.41 | 16.86 | 10.55 | 10.42 | 12.86 | 9.35E-56 | 3.65E-14 | 3.65E-14 | 4.12E-14 | 9.82E-01 | 1.77E-09 | 1.56E-10 |
| 107.95988 | 288.87 | 17.04 | 14.14 | 14.49 | 14.50 | 1.63E-22 | 7.41E-14 | 7.36E-14 | 8.03E-14 | 6.26E-01 | 6.20E-01 | 1.00E+00 |
| 107.99674 | 36.37  | 14.52 | 12.75 | 15.93 | 13.19 | 9.21E-16 | 1.16E-05 | 6.70E-04 | 2.35E-03 | 8.60E-14 | 6.62E-01 | 5.48E-11 |
| 108.01143 | 78.77  | 21.99 | 22.35 | 22.39 | 22.22 | 3.27E-02 | 7.52E-02 | 3.37E-02 | 4.37E-01 | 9.92E-01 | 8.39E-01 | 6.82E-01 |
| 108.01489 | 38.86  | 17.69 | 8.43  | 8.70  | 11.03 | 3.22E-69 | 3.65E-14 | 3.65E-14 | 3.65E-14 | 9.06E-01 | 8.82E-09 | 2.19E-07 |
| 108.04438 | 291.84 | 18.76 | 17.23 | 17.13 | 17.08 | 6.60E-07 | 6.61E-05 | 1.43E-05 | 1.71E-05 | 9.91E-01 | 9.77E-01 | 9.99E-01 |
| 108.05454 | 61.17  | 15.99 | 13.38 | 13.87 | 14.18 | 2.31E-31 | 3.65E-14 | 5.78E-14 | 7.44E-14 | 7.00E-02 | 7.61E-04 | 4.23E-01 |
| 108.05576 | 206.83 | 16.47 | 12.24 | 12.33 | 13.72 | 1.48E-22 | 7.41E-14 | 7.51E-14 | 5.36E-09 | 9.97E-01 | 5.17E-03 | 9.03E-03 |
| 108.05998 | 45.24  | 16.28 | 15.03 | 14.58 | 15.30 | 1.24E-06 | 4.18E-04 | 5.39E-07 | 1.18E-02 | 5.02E-01 | 8.46E-01 | 1.29E-01 |
| 108.08081 | 19.46  | 16.77 | 14.18 | 16.18 | 15.56 | 6.97E-19 | 7.49E-14 | 9.38E-02 | 3.77E-05 | 4.69E-12 | 5.14E-06 | 9.67E-02 |
| 108.08082 | 190.89 | 16.86 | 14.14 | 14.20 | 14.90 | 1.89E-38 | 3.65E-14 | 3.65E-14 | 7.23E-14 | 9.92E-01 | 9.56E-04 | 2.38E-03 |
| 108.5009  | 111.53 | 19.63 | 18.18 | 19.07 | 18.14 | 7.71E-19 | 8.05E-14 | 4.52E-03 | 8.05E-14 | 2.76E-06 | 9.96E-01 | 1.78E-06 |
| 108.51321 | 38.56  | 16.79 | 15.02 | 17.02 | 16.12 | 8.59E-11 | 1.33E-08 | 8.55E-01 | 1.02E-01 | 3.98E-10 | 1.75E-03 | 1.58E-02 |
| 108.54893 | 28.26  | 15.70 | 16.77 | 13.75 | 13.97 | 1.50E-63 | 6.70E-13 | 3.65E-14 | 3.70E-14 | 3.65E-14 | 3.65E-14 | 4.07E-01 |
| 108.57077 | 286.51 | 16.08 | 13.18 | 13.32 | 13.25 | 4.34E-15 | 5.98E-12 | 3.31E-11 | 5.48E-11 | 9.86E-01 | 9.98E-01 | 9.98E-01 |
| 108.5708  | 91.55  | 16.45 | 17.13 | 17.24 | 17.07 | 2.36E-05 | 6.33E-04 | 4.20E-05 | 3.20E-03 | 9.31E-01 | 9.87E-01 | 7.92E-01 |
| 109.01476 | 55.5   | 16.09 | 14.54 | 15.44 | 14.72 | 7.01E-07 | 2.04E-06 | 1.19E-01 | 5.41E-05 | 1.69E-02 | 9.43E-01 | 9.30E-02 |
| 109.02271 | 126.17 | 17.57 | 9.76  | 8.97  | 12.77 | 8.95E-43 | 3.65E-14 | 3.65E-14 | 7.63E-14 | 4.68E-01 | 1.11E-06 | 4.42E-10 |
| 109.02281 | 21.84  | 18.83 | 10.75 | 10.89 | 12.07 | 9.16E-47 | 3.65E-14 | 3.65E-14 | 3.65E-14 | 9.92E-01 | 5.40E-02 | 1.01E-01 |
| 109.02843 | 258.76 | 20.24 | 20.30 | 20.80 | 20.68 | 2.41E-02 | 9.94E-01 | 4.40E-02 | 1.87E-01 | 1.02E-01 | 3.24E-01 | 9.53E-01 |
| 109.05089 | 38.25  | 17.37 | 15.63 | 15.88 | 15.86 | 1.41E-18 | 7.44E-14 | 8.86E-13 | 2.46E-12 | 5.71E-01 | 6.60E-01 | 1.00E+00 |
| 109.07606 | 221.3  | 18.43 | 16.07 | 16.88 | 16.69 | 6.60E-32 | 3.65E-14 | 7.45E-14 | 7.26E-14 | 2.34E-05 | 3.38E-03 | 6.85E-01 |
| 109.07607 | 60.17  | 19.63 | 19.55 | 19.37 | 19.55 | 4.64E-01 | 9.70E-01 | 3.93E-01 | 9.62E-01 | 6.96E-01 | 1.00E+00 | 7.41E-01 |
| 109.10114 | 25.13  | 18.46 | 16.87 | 17.30 | 17.89 | 5.12E-30 | 3.65E-14 | 7.62E-14 | 3.13E-05 | 2.88E-03 | 4.77E-13 | 3.58E-05 |
| 109.10118 | 280.27 | 20.06 | 18.33 | 17.87 | 18.43 | 4.55E-10 | 1.90E-06 | 7.12E-10 | 1.39E-05 | 5.05E-01 | 9.92E-01 | 3.58E-01 |
| 109.50397 | 94.96  | 18.23 | 18.90 | 18.47 | 18.61 | 6.29E-02 | 3.62E-02 | 7.47E-01 | 4.42E-01 | 3.39E-01 | 6.84E-01 | 9.56E-01 |
| 109.53168 | 35.72  | 14.01 | 12.84 | 15.02 | 13.62 | 4.10E-06 | 1.67E-02 | 5.04E-02 | 7.66E-01 | 9.66E-07 | 2.42E-01 | 4.58E-03 |
| 109.97859 | 295.33 | 18.08 | 16.10 | 16.00 | 16.06 | 2.24E-22 | 7.37E-14 | 7.43E-14 | 7.51E-14 | 9.66E-01 | 9.97E-01 | 9.94E-01 |
| 109.99577 | 250.83 | 16.75 | 15.20 | 15.24 | 15.72 | 2.88E-19 | 7.47E-14 | 7.41E-14 | 5.72E-08 | 9.94E-01 | 2.04E-02 | 3.79E-02 |
| 109.99581 | 126.9  | 17.58 | 15.45 | 17.02 | 15.41 | 1.73E-24 | 7.38E-14 | 4.20E-02 | 7.52E-14 | 9.94E-11 | 9.98E-01 | 9.21E-11 |
| 110.00877 | 92.83  | 20.96 | 21.91 | 22.17 | 22.20 | 2.26E-07 | 4.54E-04 | 2.71E-06 | 3.58E-06 | 6.90E-01 | 6.38E-01 | 9.99E-01 |
| 110.01248 | 90     | 18.84 | 17.24 | 17.13 | 17.29 | 3.45E-23 | 7.52E-14 | 7.28E-14 | 7.47E-14 | 9.16E-01 | 9.96E-01 | 8.24E-01 |
| 110.02006 | 183.35 | 20.28 | 16.10 | 16.30 | 17.51 | 8.90E-31 | 3.70E-14 | 3.87E-14 | 2.95E-13 | 9.32E-01 | 4.53E-04 | 3.43E-03 |
| 110.02709 | 67.21  | 22.57 | 22.63 | 23.14 | 23.04 | 2.45E-04 | 9.75E-01 | 1.20E-03 | 1.46E-02 | 7.66E-03 | 5.74E-02 | 9.33E-01 |
| 110.03181 | 248.77 | 15.72 | 14.55 | 14.86 | 15.70 | 7.96E-05 | 5.51E-04 | 1.76E-02 | 1.00E+00 | 7.41E-01 | 1.69E-03 | 3.55E-02 |
| 110.03489 | 277.97 | 17.07 | 18.42 | 18.97 | 18.18 | 1.42E-14 | 2.24E-08 | 7.96E-14 | 1.01E-05 | 7.74E-02 | 7.30E-01 | 4.45E-03 |
| 110.06003 | 290.91 | 18.85 | 18.66 | 18.21 | 18.67 | 3.12E-01 | 9.52E-01 | 2.50E-01 | 9.61E-01 | 5.77E-01 | 1.00E+00 | 5.83E-01 |
| 110.07134 | 76.61  | 23.42 | 23.04 | 23.19 | 23.08 | 5.07E-04 | 6.21E-04 | 8.00E-02 | 4.01E-03 | 4.22E-01 | 9.78E-01 | 6.98E-01 |
| 110.07944 | 57.16  | 16.01 | 14.38 | 13.36 | 14.87 | 5.70E-11 | 4.22E-05 | 8.52E-12 | 1.08E-02 | 3.01E-02 | 5.54E-01 | 4.34E-04 |
| 110.10456 | 213.13 | 16.42 | 13.64 | 14.01 | 14.34 | 1.15E-46 | 3.65E-14 | 3.65E-14 | 3.67E-14 | 1.08E-01 | 2.45E-04 | 1.90E-01 |
| 110.51948 | 33.21  | 17.28 | 9.14  | 10.96 | 10.94 | 4.12E-32 | 3.65E-14 | 6.63E-14 | 7.09E-14 | 1.71E-02 | 2.48E-02 | 1.00E+00 |
| 110.97539 | 91.63  | 17.19 | 14.86 | 14.52 | 15.19 | 8.19E-35 | 3.74E-14 | 3.65E-14 | 7.38E-14 | 3.19E-01 | 3.44E-01 | 5.19E-03 |
| 110.98728 | 69.97  | 19.64 | 15.30 | 16.42 | 17.64 | 1.50E-48 | 3.65E-14 | 3.65E-14 | 8.56E-14 | 1.57E-05 | 7.53E-14 | 3.56E-06 |
| 111.00361 | 115.66 | 20.67 | 19.02 | 19.92 | 18.98 | 2.79E-25 | 6.96E-14 | 1.23E-05 | 6.87E-14 | 2.98E-07 | 9.96E-01 | 1.85E-07 |
| 111.00958 | 87.71  | 17.30 | 18.51 | 18.82 | 18.94 | 6.08E-12 | 2.33E-06 | 1.36E-09 | 2.85E-10 | 5.48E-01 | 2.91E-01 | 9.61E-01 |
| 111.01227 | 94.63  | 17.59 | 20.16 | 20.68 | 19.57 | 7.28E-20 | 1.42E-13 | 7.39E-14 | 1.44E-08 | 3.69E-01 | 2.76E-01 | 4.46E-03 |
| 111.02023 | 285.62 | 18.49 | 16.88 | 15.91 | 17.52 | 5.94E-09 | 3.34E-04 | 1.44E-09 | 7.58E-02 | 7.68E-02 | 4.24E-01 | 7.42E-04 |
| 111.02626 | 65.68  | 16.53 | 15.07 | 15.56 | 15.60 | 1.13E-09 | 3.21E-10 | 4.14E-05 | 1.58E-04 | 1.04E-01 | 8.72E-02 | 9.99E-01 |
| 111.03047 | 63.21  | 16.76 | 15.72 | 16.30 | 16.70 | 1.59E-05 | 2.38E-05 | 1.49E-01 | 9.93E-01 | 5.33E-02 | 2.22E-04 | 3.07E-01 |
| 111.03861 | 31.8   | 18.34 | 17.40 | 15.93 | 17.77 | 7.24E-26 | 1.92E-05 | 3.72E-14 | 2.41E-02 | 2.40E-11 | 3.04E-01 | 7.61E-14 |
| 111.0391  | 259.65 | 17.54 | 15.43 | 15.00 | 16.15 | 2.54E-20 | 1.09E-13 | 7.45E-14 | 9.79E-07 | 3.36E-01 | 3.87E-02 | 1.23E-04 |
| 111.04406 | 293.54 | 18.25 | 17.46 | 17.78 | 17.45 | 3.51E-02 | 5.21E-02 | 4.17E-01 | 5.67E-02 | 7.35E-01 | 1.00E+00 | 7.31E-01 |
| 111.04411 | 140    | 18.70 | 18.07 | 18.00 | 18.10 | 4.24E-03 | 2.12E-02 | 6.83E-03 | 3.60E-02 | 9.88E-01 | 1.00E+00 | 9.73E-01 |
| 111.05532 | 288.49 | 17.20 | 16.13 | 16.02 | 16.20 | 1.46E-09 | 4.66E-07 | 1.81E-08 | 4.92E-06 | 9.46E-01 | 9.87E-01 | 8.19E-01 |
| 111.05915 | 45.16  | 16.66 | 14.62 | 14.94 | 14.73 | 6.26E-13 | 4.65E-11 | 2.31E-08 | 1.40E-09 | 6.74E-01 | 9.80E-01 | 8.95E-01 |
| 111.06344 | 177.91 | 16.76 | 13.69 | 13.67 | 14.56 | 1.01E-48 | 3.65E-14 | 3.65E-14 | 3.90E-14 | 9.99E-01 | 4.45E-05 | 2.16E-05 |
| 111.06835 | 77.02  | 16.76 | 14.37 | 14.92 | 15.22 | 5.70E-44 | 3.65E-14 | 3.65E-14 | 5.70E-14 | 6.24E-04 | 8.87E-08 | 1.60E-01 |
| 111.07468 | 76.35  | 19.13 | 18.36 | 18.69 | 18.49 | 3.60E-15 | 8.65E-14 | 1.02E-05 | 2.50E-10 | 2.17E-03 | 5.29E-01 | 1.41E-01 |
| 111.08044 | 290.43 | 17.84 | 16.26 | 16.15 | 16.16 | 5.08E-18 | 9.29E-13 | 9.43E-14 | 2.68E-13 | 9.54E-01 | 9.74E-01 | 1.00E+00 |
| 111.09172 | 169.76 | 16.38 | 13.70 | 13.93 | 14.49 | 6.54E-51 | 3.65E-14 | 3.65E-14 | 3.67E-14 | 4.17E-01 | 2.59E-06 | 1.27E-03 |
| 111.11681 | 22.36  | 17.13 | 14.33 | 14.57 | 15.46 | 5.82E-48 | 3.65E-14 | 3.65E-14 | 7.18E-14 | 4.61E-01 | 7.50E-10 | 1.11E-06 |
| 111.11684 | 290.12 | 17.91 | 15.78 | 15.94 | 16.14 | 9.77E-21 | 7.52E-14 | 7.43E-14 | 1.50E-12 | 9.06E-01 | 4.26E-01 | 8.18E-01 |
| 111.50535 | 103.16 | 16.34 | 15.12 | 14.61 | 15.12 | 1.22E-09 | 2.15E-05 | 6.69E-10 | 3.83E-05 | 2.25E-01 | 1.00E+00 | 2.42E-01 |
| 111.51294 | 93.38  | 18.90 | 16.61 | 17.28 | 16.90 | 4.47E-31 | 3.65E-14 | 7.38E-14 | 5.38E-14 | 1.36E-03 | 4.11E-01 | 1.62E-01 |

|           |        |       |       |       |       |           |          |          |          |          |          |          |
|-----------|--------|-------|-------|-------|-------|-----------|----------|----------|----------|----------|----------|----------|
| 111.51921 | 32.43  | 19.19 | 17.81 | 18.72 | 18.09 | 5.23E-11  | 2.11E-10 | 8.67E-02 | 9.28E-07 | 5.90E-05 | 5.43E-01 | 1.30E-02 |
| 111.52193 | 150.6  | 17.39 | 13.23 | 12.74 | 15.74 | 1.24E-36  | 3.67E-14 | 3.65E-14 | 1.22E-05 | 4.74E-01 | 5.62E-11 | 8.14E-14 |
| 111.52717 | 98.06  | 17.09 | 15.34 | 15.27 | 15.01 | 1.44E-10  | 4.81E-07 | 1.05E-07 | 4.31E-09 | 9.95E-01 | 7.48E-01 | 8.64E-01 |
| 111.96834 | 280.45 | 21.91 | 17.46 | 17.13 | 19.33 | 6.22E-44  | 3.65E-14 | 3.65E-14 | 8.20E-14 | 6.95E-01 | 3.34E-08 | 6.16E-11 |
| 111.98441 | 282.29 | 20.43 | 16.17 | 15.70 | 17.86 | 8.67E-49  | 3.65E-14 | 3.65E-14 | 7.43E-14 | 2.93E-01 | 2.97E-08 | 1.06E-12 |
| 112.00663 | 249.12 | 18.18 | 14.26 | 14.64 | 16.02 | 5.97E-51  | 3.65E-14 | 3.65E-14 | 7.45E-14 | 2.88E-01 | 5.96E-13 | 9.48E-09 |
| 112.00664 | 90.05  | 21.36 | 22.17 | 22.24 | 21.91 | 3.13E-03  | 1.07E-02 | 4.11E-03 | 1.72E-01 | 9.94E-01 | 7.70E-01 | 6.14E-01 |
| 112.01108 | 87.35  | 14.54 | 16.60 | 17.20 | 16.10 | 4.61E-13  | 2.04E-08 | 4.82E-13 | 5.30E-05 | 3.12E-01 | 4.94E-01 | 1.14E-02 |
| 112.018   | 150.3  | 18.47 | 16.61 | 15.98 | 18.61 | 1.09E-16  | 1.84E-07 | 2.16E-12 | 9.75E-01 | 2.39E-01 | 1.16E-07 | 2.51E-12 |
| 112.02815 | 37.2   | 17.04 | 12.93 | 15.27 | 15.67 | 8.10E-25  | 3.72E-14 | 1.21E-06 | 4.92E-04 | 3.92E-10 | 1.71E-12 | 6.60E-01 |
| 112.03932 | 286.98 | 17.93 | 16.75 | 16.68 | 16.73 | 4.45E-12  | 7.62E-09 | 7.40E-10 | 1.10E-08 | 9.86E-01 | 1.00E+00 | 9.95E-01 |
| 112.05055 | 267.51 | 21.52 | 22.53 | 22.05 | 21.51 | 2.36E-11  | 6.22E-10 | 2.54E-03 | 1.00E+00 | 9.00E-03 | 4.28E-09 | 4.48E-03 |
| 112.06178 | 274.62 | 16.66 | 16.58 | 16.28 | 15.74 | 6.02E-04  | 9.87E-01 | 3.26E-01 | 5.93E-04 | 5.53E-01 | 2.96E-03 | 1.10E-01 |
| 112.0757  | 291.44 | 18.04 | 16.65 | 16.76 | 16.67 | 6.75E-12  | 1.57E-09 | 1.71E-08 | 5.78E-09 | 9.64E-01 | 1.00E+00 | 9.77E-01 |
| 112.08697 | 61.67  | 20.91 | 21.23 | 21.31 | 21.48 | 3.86E-02  | 3.57E-01 | 1.64E-01 | 2.63E-02 | 9.77E-01 | 6.35E-01 | 8.53E-01 |
| 112.11208 | 272.54 | 18.57 | 20.30 | 19.49 | 19.39 | 1.31E-09  | 1.17E-10 | 1.05E-03 | 7.17E-03 | 7.78E-03 | 2.85E-03 | 9.77E-01 |
| 112.50496 | 91.75  | 14.18 | 13.41 | 13.68 | 13.72 | 4.97E-01  | 4.26E-01 | 7.44E-01 | 8.06E-01 | 9.57E-01 | 9.42E-01 | 1.00E+00 |
| 112.50837 | 103.63 | 17.45 | 16.82 | 16.39 | 16.54 | 5.06E-04  | 8.86E-02 | 4.78E-04 | 5.44E-03 | 3.93E-01 | 7.44E-01 | 9.54E-01 |
| 112.5152  | 92.56  | 17.46 | 15.16 | 14.86 | 15.60 | 3.08E-26  | 7.41E-14 | 4.30E-14 | 3.28E-13 | 5.74E-01 | 2.56E-01 | 1.13E-02 |
| 112.52031 | 109.39 | 17.42 | 14.57 | 14.98 | 15.14 | 7.58E-35  | 3.65E-14 | 3.85E-14 | 6.03E-14 | 2.18E-01 | 4.71E-02 | 8.77E-01 |
| 112.54283 | 78.04  | 15.53 | 15.98 | 15.81 | 15.82 | 2.33E-01  | 1.73E-01 | 5.77E-01 | 5.75E-01 | 8.70E-01 | 8.99E-01 | 1.00E+00 |
| 112.89576 | 47.57  | 26.31 | 25.90 | 25.92 | 25.80 | 9.93E-07  | 1.36E-04 | 2.51E-04 | 2.56E-06 | 9.98E-01 | 7.68E-01 | 6.55E-01 |
| 112.95591 | 23.95  | 18.95 | 8.43  | 8.76  | 12.22 | 2.15E-98  | 3.65E-14 | 3.65E-14 | 3.65E-14 | 7.00E-01 | 4.05E-14 | 6.21E-14 |
| 112.96682 | 268.22 | 22.43 | 18.04 | 17.61 | 19.74 | 5.69E-55  | 3.65E-14 | 3.65E-14 | 6.52E-14 | 3.07E-01 | 1.60E-09 | 1.15E-13 |
| 112.97627 | 27.84  | 17.65 | 9.05  | 9.59  | 10.62 | 1.83E-102 | 3.65E-14 | 3.65E-14 | 3.65E-14 | 1.14E-01 | 9.25E-09 | 2.56E-04 |
| 112.97844 | 272.05 | 22.27 | 21.26 | 21.38 | 21.45 | 9.53E-04  | 1.68E-03 | 6.42E-03 | 1.97E-02 | 9.77E-01 | 9.20E-01 | 9.95E-01 |
| 112.98664 | 266.35 | 15.71 | 9.73  | 9.06  | 11.73 | 1.89E-22  | 7.47E-14 | 6.85E-14 | 2.83E-08 | 7.25E-01 | 1.72E-02 | 4.72E-04 |
| 112.99107 | 91.72  | 19.24 | 14.38 | 15.19 | 15.69 | 8.59E-42  | 3.65E-14 | 3.65E-14 | 4.34E-14 | 4.26E-02 | 2.49E-04 | 3.66E-01 |
| 112.99995 | 107.22 | 16.70 | 15.51 | 15.18 | 15.37 | 8.04E-10  | 6.93E-06 | 3.87E-09 | 8.52E-07 | 5.20E-01 | 9.47E-01 | 8.62E-01 |
| 113.0046  | 105.53 | 17.74 | 17.17 | 16.63 | 16.97 | 2.05E-07  | 1.42E-02 | 5.59E-08 | 5.15E-04 | 2.74E-02 | 7.48E-01 | 3.10E-01 |
| 113.00952 | 28.92  | 13.53 | 13.94 | 13.95 | 14.32 | 1.14E-02  | 2.80E-01 | 2.49E-01 | 4.55E-03 | 1.00E+00 | 3.84E-01 | 4.04E-01 |
| 113.01891 | 96.09  | 15.07 | 14.40 | 15.24 | 14.13 | 2.67E-04  | 7.52E-02 | 9.23E-01 | 6.26E-03 | 1.71E-02 | 8.04E-01 | 1.02E-03 |
| 113.02281 | 88.09  | 19.54 | 21.13 | 21.33 | 20.90 | 6.46E-15  | 5.94E-11 | 2.00E-13 | 5.40E-08 | 8.03E-01 | 7.51E-01 | 2.37E-01 |
| 113.03457 | 265.24 | 22.87 | 21.96 | 21.56 | 22.04 | 1.71E-04  | 1.23E-02 | 7.15E-05 | 3.21E-02 | 5.52E-01 | 9.95E-01 | 4.21E-01 |
| 113.04761 | 253.06 | 13.14 | 13.94 | 14.55 | 13.48 | 1.51E-03  | 1.39E-01 | 8.55E-04 | 8.06E-01 | 3.65E-01 | 6.50E-01 | 3.13E-02 |
| 113.04766 | 142.47 | 12.38 | 14.15 | 14.39 | 13.94 | 5.32E-07  | 3.36E-05 | 1.53E-06 | 5.12E-04 | 9.31E-01 | 9.54E-01 | 6.81E-01 |
| 113.0539  | 257.02 | 16.83 | 17.88 | 17.31 | 16.80 | 3.73E-24  | 6.58E-14 | 9.11E-06 | 9.92E-01 | 3.03E-07 | 7.27E-14 | 9.04E-06 |
| 113.06002 | 285.84 | 17.62 | 16.05 | 16.20 | 16.28 | 1.42E-20  | 7.52E-14 | 7.63E-14 | 4.88E-13 | 8.02E-01 | 5.51E-01 | 9.70E-01 |
| 113.07098 | 253.07 | 18.20 | 16.86 | 16.05 | 16.82 | 1.47E-13  | 2.74E-06 | 1.01E-13 | 2.26E-06 | 1.19E-02 | 9.98E-01 | 2.47E-02 |
| 113.07101 | 80.85  | 19.90 | 19.73 | 20.21 | 19.86 | 2.96E-04  | 4.16E-01 | 2.12E-02 | 9.81E-01 | 1.44E-04 | 7.00E-01 | 1.13E-02 |
| 113.07995 | 198.52 | 16.00 | 12.94 | 13.55 | 13.75 | 4.22E-34  | 3.65E-14 | 4.67E-14 | 7.26E-14 | 3.06E-02 | 2.56E-03 | 8.13E-01 |
| 113.09035 | 69.69  | 16.91 | 16.14 | 15.95 | 16.53 | 4.95E-03  | 3.80E-02 | 4.42E-03 | 5.68E-01 | 9.12E-01 | 5.71E-01 | 2.13E-01 |
| 113.09618 | 184.76 | 16.61 | 13.68 | 14.03 | 14.67 | 3.17E-42  | 3.65E-14 | 3.65E-14 | 6.83E-14 | 2.21E-01 | 2.78E-06 | 5.04E-03 |
| 113.10736 | 170.96 | 17.04 | 16.17 | 16.77 | 16.82 | 3.05E-05  | 1.17E-05 | 4.26E-01 | 6.50E-01 | 6.17E-03 | 3.29E-03 | 9.91E-01 |
| 113.1155  | 35.75  | 11.91 | 12.77 | 10.59 | 13.86 | 2.56E-07  | 3.74E-01 | 6.18E-02 | 2.44E-03 | 5.03E-04 | 2.15E-01 | 1.02E-07 |
| 113.13247 | 23.76  | 13.79 | 8.38  | 7.67  | 7.68  | 1.82E-29  | 7.29E-14 | 4.16E-14 | 5.05E-14 | 5.44E-01 | 5.89E-01 | 1.00E+00 |
| 113.5048  | 119.33 | 16.69 | 14.65 | 15.88 | 15.02 | 1.24E-22  | 6.43E-14 | 1.46E-04 | 8.44E-14 | 6.94E-09 | 2.49E-01 | 1.33E-04 |
| 113.52083 | 84.91  | 14.93 | 15.61 | 15.09 | 15.84 | 2.08E-04  | 1.33E-02 | 8.84E-01 | 5.38E-04 | 1.07E-01 | 7.66E-01 | 8.55E-03 |
| 113.52354 | 66.64  | 15.61 | 17.86 | 17.75 | 17.55 | 3.49E-21  | 7.47E-14 | 7.47E-14 | 3.27E-13 | 9.68E-01 | 6.11E-01 | 8.59E-01 |
| 113.52866 | 73.36  | 17.70 | 15.98 | 16.46 | 16.57 | 1.70E-17  | 7.37E-14 | 2.35E-10 | 2.45E-08 | 4.57E-02 | 1.14E-02 | 9.39E-01 |
| 113.53171 | 85.66  | 17.57 | 19.34 | 19.64 | 19.25 | 3.25E-37  | 3.70E-14 | 3.65E-14 | 4.50E-14 | 1.74E-01 | 9.24E-01 | 4.51E-02 |
| 113.96367 | 280.37 | 26.28 | 23.53 | 23.14 | 24.69 | 9.33E-28  | 6.89E-14 | 3.76E-14 | 5.51E-08 | 4.75E-01 | 2.17E-04 | 2.93E-07 |
| 113.96375 | 55.11  | 26.00 | 21.20 | 21.50 | 23.52 | 2.83E-79  | 3.65E-14 | 3.65E-14 | 3.65E-14 | 3.10E-01 | 3.67E-14 | 5.74E-14 |
| 114.0031  | 103.49 | 15.98 | 15.76 | 15.23 | 15.48 | 6.98E-02  | 8.82E-01 | 5.38E-02 | 3.55E-01 | 2.97E-01 | 8.05E-01 | 8.52E-01 |
| 114.00888 | 26.21  | 16.37 | 10.16 | 11.63 | 11.75 | 8.18E-54  | 3.65E-14 | 3.65E-14 | 3.65E-14 | 2.67E-05 | 9.19E-06 | 9.79E-01 |
| 114.02129 | 78.16  | 17.27 | 17.53 | 17.90 | 17.62 | 6.40E-05  | 1.98E-01 | 1.46E-05 | 5.00E-02 | 3.30E-02 | 9.20E-01 | 1.79E-01 |
| 114.03192 | 59.97  | 16.64 | 15.23 | 15.52 | 15.87 | 8.83E-07  | 7.03E-07 | 1.17E-04 | 2.18E-02 | 6.71E-01 | 8.60E-02 | 5.72E-01 |
| 114.03796 | 275.65 | 17.07 | 15.68 | 15.19 | 15.74 | 7.33E-16  | 2.12E-09 | 7.45E-14 | 2.54E-08 | 1.14E-01 | 9.93E-01 | 6.76E-02 |
| 114.038   | 32.3   | 18.46 | 15.95 | 16.20 | 16.46 | 1.63E-41  | 3.65E-14 | 3.65E-14 | 3.76E-14 | 4.45E-01 | 1.68E-02 | 4.08E-01 |
| 114.03808 | 162.68 | 17.84 | 16.56 | 16.80 | 16.69 | 2.39E-14  | 1.20E-12 | 3.83E-09 | 3.74E-10 | 4.99E-01 | 8.80E-01 | 9.25E-01 |
| 114.05497 | 272.37 | 20.47 | 18.98 | 18.45 | 19.61 | 2.01E-09  | 1.27E-05 | 1.29E-09 | 3.53E-02 | 3.33E-01 | 2.06E-01 | 2.03E-03 |
| 114.06061 | 93.09  | 17.20 | 17.46 | 17.42 | 17.42 | 6.07E-01  | 6.28E-01 | 7.25E-01 | 7.38E-01 | 9.98E-01 | 9.99E-01 | 1.00E+00 |
| 114.06449 | 291.31 | 18.95 | 18.67 | 18.82 | 18.30 | 3.66E-01  | 8.66E-01 | 9.84E-01 | 3.09E-01 | 9.77E-01 | 7.78E-01 | 5.29E-01 |
| 114.06619 | 270.27 | 20.93 | 20.07 | 19.85 | 20.62 | 8.16E-03  | 6.38E-02 | 9.36E-03 | 8.17E-01 | 9.22E-01 | 4.36E-01 | 1.45E-01 |
| 114.0733  | 220.18 | 16.46 | 17.03 | 16.69 | 17.02 | 1.30E-04  | 4.58E-04 | 3.64E-01 | 1.09E-03 | 8.99E-02 | 9.99E-01 | 1.34E-01 |
| 114.09133 | 273.59 | 20.60 | 19.72 | 18.57 | 19.53 | 5.18E-09  | 2.02E-02 | 5.22E-10 | 3.51E-03 | 1.31E-03 | 9.30E-01 | 1.39E-02 |
| 114.10263 | 58.19  | 15.88 | 14.52 | 14.73 | 15.30 | 4.75E-08  | 1.26E-07 | 8.72E-06 | 7.67E-02 | 8.11E-01 | 1.00E-02 | 9.94E-02 |
| 114.12772 | 31.94  | 16.44 | 13.91 | 14.81 | 14.93 | 9.37E-05  | 3.05E-05 | 1.37E-02 | 3.51E-02 | 3.72E-01 | 2.88E-01 | 9.97E-01 |

|           |        |       |       |       |       |           |          |          |          |          |          |          |
|-----------|--------|-------|-------|-------|-------|-----------|----------|----------|----------|----------|----------|----------|
| 114.47826 | 268.73 | 17.01 | 10.71 | 11.42 | 11.72 | 1.57E-30  | 3.70E-14 | 5.27E-14 | 7.41E-14 | 5.20E-01 | 2.32E-01 | 9.39E-01 |
| 114.4974  | 144.94 | 17.14 | 15.49 | 15.08 | 15.96 | 2.20E-23  | 7.61E-14 | 5.07E-14 | 1.19E-08 | 1.24E-01 | 8.76E-02 | 5.52E-05 |
| 114.51271 | 32.82  | 11.06 | 13.34 | 16.03 | 13.71 | 3.49E-13  | 9.18E-04 | 9.60E-14 | 1.16E-04 | 8.11E-05 | 9.32E-01 | 1.37E-03 |
| 114.52284 | 96.24  | 16.08 | 15.00 | 15.48 | 15.06 | 1.28E-06  | 4.39E-06 | 2.51E-02 | 2.84E-05 | 1.19E-01 | 9.93E-01 | 2.30E-01 |
| 114.5305  | 86.08  | 15.74 | 15.47 | 15.71 | 15.89 | 3.44E-01  | 6.02E-01 | 9.99E-01 | 9.11E-01 | 7.09E-01 | 2.70E-01 | 8.60E-01 |
| 114.89292 | 48.92  | 25.17 | 24.88 | 24.88 | 24.60 | 1.06E-04  | 6.28E-02 | 5.65E-02 | 2.37E-05 | 1.00E+00 | 1.20E-01 | 1.19E-01 |
| 114.96413 | 288.09 | 20.21 | 16.36 | 15.95 | 17.41 | 9.30E-52  | 3.65E-14 | 3.65E-14 | 3.81E-14 | 2.86E-01 | 1.05E-04 | 2.03E-08 |
| 114.96702 | 291.04 | 19.97 | 16.39 | 15.89 | 17.40 | 1.05E-42  | 3.65E-14 | 3.65E-14 | 7.48E-14 | 1.98E-01 | 9.39E-04 | 1.37E-07 |
| 114.97149 | 291.08 | 20.47 | 17.18 | 16.75 | 18.63 | 1.85E-23  | 7.63E-14 | 6.27E-14 | 2.61E-06 | 6.15E-01 | 6.19E-04 | 3.16E-06 |
| 114.9929  | 134.64 | 16.70 | 14.89 | 15.48 | 14.75 | 3.69E-17  | 1.65E-13 | 3.10E-07 | 8.23E-14 | 4.87E-02 | 9.31E-01 | 1.02E-02 |
| 115.01151 | 97.58  | 18.13 | 18.12 | 18.77 | 18.40 | 2.64E-04  | 1.00E+00 | 5.76E-04 | 3.62E-01 | 8.85E-04 | 3.80E-01 | 1.43E-01 |
| 115.02844 | 270.12 | 20.21 | 16.65 | 16.34 | 17.36 | 1.86E-41  | 3.65E-14 | 3.65E-14 | 5.14E-14 | 6.07E-01 | 3.78E-02 | 6.82E-04 |
| 115.02849 | 145.37 | 19.23 | 15.28 | 15.04 | 16.13 | 1.86E-55  | 3.65E-14 | 3.65E-14 | 3.65E-14 | 6.83E-01 | 1.33E-03 | 1.34E-05 |
| 115.03895 | 290.59 | 18.84 | 17.96 | 18.17 | 18.16 | 4.01E-02  | 3.51E-02 | 1.60E-01 | 1.73E-01 | 9.19E-01 | 9.37E-01 | 1.00E+00 |
| 115.04667 | 263.41 | 17.19 | 12.78 | 13.48 | 13.72 | 2.46E-30  | 3.67E-14 | 6.23E-14 | 7.38E-14 | 1.91E-01 | 5.10E-02 | 9.15E-01 |
| 115.04974 | 288.68 | 17.55 | 16.59 | 16.52 | 16.61 | 7.04E-04  | 5.13E-03 | 1.92E-03 | 8.77E-03 | 9.95E-01 | 1.00E+00 | 9.89E-01 |
| 115.05423 | 277.91 | 19.27 | 17.10 | 17.10 | 17.42 | 9.99E-14  | 3.67E-11 | 2.39E-11 | 4.28E-08 | 1.00E+00 | 7.32E-01 | 7.25E-01 |
| 115.05834 | 185.5  | 16.79 | 14.15 | 14.11 | 14.78 | 2.73E-45  | 3.65E-14 | 3.65E-14 | 3.94E-14 | 9.97E-01 | 2.10E-03 | 9.46E-04 |
| 115.0696  | 185.82 | 16.77 | 14.61 | 15.32 | 14.79 | 1.13E-28  | 3.74E-14 | 1.39E-13 | 6.07E-14 | 5.67E-04 | 7.55E-01 | 2.31E-02 |
| 115.07609 | 277.75 | 17.07 | 14.80 | 15.25 | 15.30 | 4.76E-26  | 4.16E-14 | 7.24E-14 | 7.65E-14 | 1.05E-01 | 6.92E-02 | 9.94E-01 |
| 115.08666 | 74.36  | 20.15 | 21.10 | 21.04 | 20.79 | 2.78E-05  | 7.81E-05 | 1.96E-04 | 1.97E-02 | 9.94E-01 | 5.19E-01 | 6.69E-01 |
| 115.09505 | 23.15  | 16.76 | 14.98 | 12.26 | 16.16 | 3.22E-39  | 1.19E-08 | 3.65E-14 | 1.79E-01 | 7.34E-14 | 6.25E-04 | 3.65E-14 |
| 115.0951  | 184.3  | 16.74 | 14.24 | 13.95 | 14.87 | 2.60E-34  | 3.72E-14 | 3.65E-14 | 7.43E-14 | 5.04E-01 | 1.71E-02 | 1.18E-04 |
| 115.52575 | 80.39  | 19.02 | 21.97 | 21.94 | 21.58 | 4.31E-38  | 3.65E-14 | 3.65E-14 | 4.07E-14 | 9.99E-01 | 2.97E-01 | 3.63E-01 |
| 115.53013 | 258.25 | 17.18 | 12.65 | 12.46 | 14.38 | 2.79E-32  | 3.72E-14 | 3.65E-14 | 1.04E-11 | 9.60E-01 | 7.01E-05 | 6.86E-06 |
| 115.55156 | 147.97 | 10.90 | 13.71 | 13.74 | 13.94 | 8.61E-14  | 5.78E-10 | 2.36E-10 | 6.64E-11 | 1.00E+00 | 9.52E-01 | 9.70E-01 |
| 115.57865 | 122.79 | 17.48 | 18.70 | 18.65 | 18.37 | 3.06E-10  | 6.62E-09 | 1.91E-08 | 5.09E-05 | 9.95E-01 | 3.82E-01 | 5.20E-01 |
| 115.943   | 25.92  | 16.93 | 10.69 | 11.38 | 12.10 | 6.79E-78  | 3.65E-14 | 3.65E-14 | 3.65E-14 | 1.89E-02 | 1.21E-07 | 1.57E-02 |
| 115.95421 | 30.22  | 17.42 | 15.30 | 16.69 | 15.65 | 9.87E-27  | 4.16E-14 | 3.29E-04 | 7.45E-14 | 8.07E-12 | 2.52E-01 | 7.25E-07 |
| 115.95745 | 270.5  | 21.34 | 18.33 | 18.45 | 18.28 | 8.89E-23  | 7.38E-14 | 7.41E-14 | 7.29E-14 | 9.82E-01 | 9.99E-01 | 9.58E-01 |
| 115.96213 | 19.67  | 18.43 | 8.23  | 8.75  | 10.98 | 4.25E-85  | 3.65E-14 | 3.65E-14 | 3.65E-14 | 4.64E-01 | 7.70E-12 | 1.92E-08 |
| 115.96407 | 271.11 | 20.92 | 18.89 | 18.19 | 18.84 | 1.24E-09  | 1.07E-05 | 1.44E-09 | 1.18E-05 | 3.63E-01 | 1.00E+00 | 4.46E-01 |
| 115.97198 | 24.1   | 16.32 | 8.76  | 9.29  | 10.03 | 1.83E-101 | 3.65E-14 | 3.65E-14 | 3.65E-14 | 7.30E-02 | 2.50E-07 | 5.20E-03 |
| 115.97849 | 22.21  | 14.98 | 13.47 | 16.65 | 15.53 | 2.14E-10  | 2.64E-03 | 5.80E-04 | 5.88E-01 | 3.15E-11 | 4.67E-05 | 6.21E-02 |
| 116.00192 | 275.9  | 20.04 | 17.17 | 16.66 | 17.61 | 3.12E-18  | 8.05E-13 | 7.47E-14 | 2.74E-09 | 5.14E-01 | 6.61E-01 | 6.25E-02 |
| 116.00197 | 146.72 | 18.64 | 16.00 | 16.16 | 16.16 | 2.33E-32  | 3.72E-14 | 4.12E-14 | 4.81E-14 | 8.73E-01 | 8.88E-01 | 1.00E+00 |
| 116.0123  | 92.84  | 13.65 | 14.41 | 15.32 | 14.97 | 8.48E-04  | 2.86E-01 | 5.91E-04 | 1.55E-02 | 1.60E-01 | 6.07E-01 | 8.57E-01 |
| 116.01638 | 197.4  | 14.89 | 14.84 | 14.65 | 15.53 | 1.73E-02  | 9.98E-01 | 7.96E-01 | 1.02E-01 | 8.94E-01 | 7.98E-02 | 1.13E-02 |
| 116.02662 | 86.71  | 16.73 | 18.90 | 18.85 | 18.68 | 3.03E-26  | 6.47E-14 | 6.74E-14 | 7.47E-14 | 9.94E-01 | 7.09E-01 | 8.40E-01 |
| 116.03431 | 80.23  | 23.01 | 22.89 | 23.31 | 22.78 | 4.41E-05  | 7.08E-01 | 2.67E-02 | 1.79E-01 | 1.18E-03 | 7.72E-01 | 3.41E-05 |
| 116.04011 | 78.16  | 14.81 | 16.08 | 15.88 | 15.68 | 1.83E-04  | 2.10E-04 | 2.25E-03 | 2.72E-02 | 9.18E-01 | 5.92E-01 | 9.19E-01 |
| 116.04238 | 192.38 | 15.50 | 12.93 | 13.37 | 13.46 | 2.26E-17  | 7.42E-14 | 7.35E-12 | 2.09E-10 | 4.33E-01 | 3.00E-01 | 9.91E-01 |
| 116.04716 | 53.57  | 17.20 | 15.76 | 15.24 | 15.00 | 3.31E-21  | 8.57E-10 | 7.45E-14 | 7.61E-14 | 9.35E-02 | 5.55E-03 | 7.00E-01 |
| 116.04953 | 38.58  | 16.71 | 14.44 | 15.53 | 15.52 | 1.48E-07  | 1.78E-08 | 7.29E-03 | 9.88E-03 | 2.15E-02 | 2.95E-02 | 1.00E+00 |
| 116.0528  | 191.37 | 16.51 | 13.95 | 14.15 | 14.63 | 1.12E-40  | 3.65E-14 | 3.65E-14 | 5.76E-14 | 6.28E-01 | 7.17E-04 | 3.09E-02 |
| 116.05764 | 37.94  | 17.49 | 14.98 | 16.47 | 16.62 | 3.74E-18  | 7.28E-14 | 2.51E-04 | 3.70E-03 | 8.03E-08 | 1.14E-08 | 9.43E-01 |
| 116.06198 | 199.67 | 15.80 | 12.69 | 13.25 | 12.89 | 1.02E-21  | 7.25E-14 | 1.83E-13 | 7.43E-14 | 2.91E-01 | 9.27E-01 | 6.87E-01 |
| 116.07067 | 77.32  | 26.34 | 25.61 | 25.69 | 25.84 | 2.22E-13  | 3.06E-12 | 2.91E-10 | 4.87E-06 | 8.50E-01 | 9.29E-02 | 4.00E-01 |
| 116.08015 | 295.67 | 18.25 | 20.13 | 20.21 | 19.25 | 1.42E-07  | 3.49E-06 | 8.95E-07 | 3.84E-02 | 9.96E-01 | 1.12E-01 | 6.39E-02 |
| 116.09    | 79.97  | 16.36 | 15.53 | 15.10 | 15.48 | 1.61E-08  | 2.48E-04 | 6.11E-09 | 1.36E-04 | 1.58E-01 | 9.95E-01 | 2.79E-01 |
| 116.10698 | 290.44 | 17.57 | 16.86 | 16.74 | 16.94 | 9.15E-04  | 7.88E-03 | 1.08E-03 | 3.11E-02 | 9.53E-01 | 9.84E-01 | 8.16E-01 |
| 116.10702 | 180.32 | 18.31 | 18.09 | 18.06 | 17.80 | 2.02E-01  | 7.55E-01 | 6.71E-01 | 1.31E-01 | 9.99E-01 | 6.40E-01 | 7.10E-01 |
| 116.49948 | 38.46  | 17.95 | 13.27 | 13.64 | 14.25 | 6.29E-80  | 3.65E-14 | 3.65E-14 | 3.65E-14 | 1.27E-01 | 6.23E-07 | 4.35E-03 |
| 116.51017 | 35.06  | 15.58 | 14.79 | 16.99 | 15.14 | 3.77E-07  | 1.65E-01 | 1.52E-03 | 6.81E-01 | 3.68E-07 | 8.17E-01 | 4.51E-05 |
| 116.52471 | 86.71  | 16.61 | 18.58 | 18.53 | 18.38 | 3.75E-21  | 7.54E-14 | 7.45E-14 | 1.76E-13 | 9.96E-01 | 7.91E-01 | 8.87E-01 |
| 116.53391 | 75.14  | 16.64 | 14.45 | 15.13 | 14.62 | 6.96E-14  | 1.45E-12 | 9.56E-07 | 1.75E-10 | 8.24E-02 | 9.37E-01 | 3.05E-01 |
| 116.54178 | 87.24  | 18.09 | 20.42 | 20.35 | 19.85 | 2.15E-22  | 7.42E-14 | 7.55E-14 | 1.75E-11 | 9.91E-01 | 9.62E-02 | 1.72E-01 |
| 116.54649 | 29.24  | 12.88 | 17.01 | 11.61 | 14.56 | 7.80E-21  | 1.58E-13 | 5.50E-02 | 6.57E-03 | 6.81E-14 | 3.82E-05 | 3.53E-07 |
| 116.89092 | 46.75  | 22.03 | 21.71 | 21.83 | 21.43 | 4.24E-06  | 1.80E-02 | 2.59E-01 | 1.07E-06 | 6.84E-01 | 7.38E-02 | 2.76E-03 |
| 116.96194 | 42.31  | 21.04 | 19.86 | 20.68 | 19.76 | 2.34E-12  | 5.36E-09 | 2.01E-01 | 6.38E-10 | 1.25E-04 | 9.53E-01 | 2.00E-05 |
| 116.9719  | 276.1  | 20.39 | 18.76 | 18.12 | 17.83 | 9.58E-07  | 4.75E-03 | 2.27E-05 | 3.14E-06 | 5.73E-01 | 2.67E-01 | 9.38E-01 |
| 116.9746  | 36.33  | 17.00 | 10.23 | 10.75 | 12.50 | 5.30E-69  | 3.65E-14 | 3.65E-14 | 3.65E-14 | 2.75E-01 | 2.76E-12 | 4.59E-08 |
| 116.99234 | 55.48  | 16.78 | 14.36 | 14.45 | 13.74 | 1.90E-15  | 4.13E-10 | 1.10E-09 | 1.09E-13 | 9.96E-01 | 3.48E-01 | 2.33E-01 |
| 116.99483 | 145.58 | 10.61 | 13.98 | 14.20 | 13.90 | 3.77E-35  | 3.72E-14 | 3.65E-14 | 4.03E-14 | 8.48E-01 | 9.94E-01 | 7.17E-01 |
| 117.00215 | 36.29  | 16.91 | 16.86 | 18.87 | 16.77 | 4.01E-30  | 9.91E-01 | 4.56E-14 | 8.59E-01 | 4.72E-14 | 9.61E-01 | 4.30E-14 |
| 117.00905 | 93.96  | 15.56 | 15.21 | 15.98 | 15.54 | 5.48E-02  | 5.66E-01 | 3.87E-01 | 1.00E+00 | 2.80E-02 | 6.56E-01 | 3.97E-01 |
| 117.03766 | 72.05  | 18.03 | 17.88 | 18.31 | 17.82 | 1.67E-03  | 6.32E-01 | 1.35E-01 | 3.81E-01 | 6.94E-03 | 9.74E-01 | 2.12E-03 |
| 117.04219 | 83.7   | 16.22 | 16.58 | 16.49 | 16.62 | 6.72E-02  | 1.18E-01 | 3.34E-01 | 8.03E-02 | 9.47E-01 | 9.96E-01 | 8.74E-01 |

|           |        |       |       |       |       |          |          |          |          |          |          |          |
|-----------|--------|-------|-------|-------|-------|----------|----------|----------|----------|----------|----------|----------|
| 117.05512 | 253.61 | 16.56 | 14.32 | 14.33 | 14.79 | 2.22E-34 | 3.65E-14 | 3.65E-14 | 7.35E-14 | 1.00E+00 | 4.72E-02 | 5.49E-02 |
| 117.05733 | 41.97  | 21.03 | 20.04 | 20.55 | 20.31 | 1.76E-21 | 6.05E-14 | 1.07E-06 | 2.01E-12 | 7.96E-07 | 2.83E-02 | 6.36E-02 |
| 117.0653  | 178.29 | 16.16 | 13.53 | 13.81 | 14.10 | 3.15E-40 | 3.65E-14 | 3.65E-14 | 4.16E-14 | 3.87E-01 | 1.05E-02 | 3.75E-01 |
| 117.0677  | 55.25  | 17.89 | 15.83 | 16.37 | 16.36 | 4.27E-40 | 3.65E-14 | 3.85E-14 | 4.16E-14 | 2.34E-04 | 5.34E-04 | 1.00E+00 |
| 117.06987 | 278.42 | 17.72 | 15.71 | 15.71 | 15.93 | 3.45E-25 | 7.16E-14 | 6.87E-14 | 7.43E-14 | 1.00E+00 | 7.02E-01 | 7.09E-01 |
| 117.06988 | 30.73  | 18.13 | 16.21 | 16.85 | 17.47 | 4.49E-16 | 7.41E-14 | 2.25E-08 | 1.35E-02 | 1.87E-02 | 3.17E-07 | 2.75E-02 |
| 117.07401 | 79.25  | 22.15 | 21.21 | 21.52 | 21.40 | 1.67E-22 | 6.07E-14 | 2.16E-11 | 8.73E-14 | 2.60E-03 | 1.80E-01 | 4.89E-01 |
| 117.07722 | 176.43 | 16.53 | 13.93 | 14.41 | 14.02 | 5.36E-38 | 3.65E-14 | 4.16E-14 | 3.65E-14 | 4.92E-02 | 9.74E-01 | 1.56E-01 |
| 117.1023  | 55.5   | 16.19 | 14.64 | 14.96 | 15.00 | 7.69E-22 | 6.85E-14 | 1.02E-13 | 8.79E-13 | 1.45E-01 | 9.99E-02 | 9.95E-01 |
| 117.10231 | 217.08 | 16.31 | 13.77 | 14.03 | 14.25 | 6.76E-44 | 3.65E-14 | 3.65E-14 | 3.65E-14 | 3.72E-01 | 1.96E-02 | 5.15E-01 |
| 117.5043  | 111.6  | 14.01 | 14.63 | 14.86 | 14.32 | 2.98E-01 | 5.45E-01 | 2.60E-01 | 9.15E-01 | 9.64E-01 | 9.24E-01 | 6.93E-01 |
| 117.50619 | 98.53  | 17.05 | 14.47 | 15.42 | 14.92 | 2.76E-40 | 3.65E-14 | 7.12E-14 | 3.65E-14 | 1.08E-07 | 4.11E-02 | 1.51E-02 |
| 117.51818 | 31.32  | 16.79 | 15.89 | 17.83 | 16.98 | 2.00E-12 | 7.93E-04 | 5.54E-05 | 8.56E-01 | 2.15E-13 | 8.50E-05 | 3.13E-03 |
| 117.54053 | 82.2   | 16.35 | 16.66 | 16.65 | 16.77 | 4.43E-02 | 1.77E-01 | 1.99E-01 | 3.70E-02 | 1.00E+00 | 9.00E-01 | 8.66E-01 |
| 117.95454 | 260.53 | 20.05 | 16.06 | 16.40 | 16.73 | 2.13E-36 | 3.65E-14 | 3.65E-14 | 4.79E-14 | 6.64E-01 | 1.23E-01 | 6.80E-01 |
| 117.95953 | 271.05 | 19.40 | 16.88 | 16.10 | 18.38 | 1.54E-23 | 1.19E-13 | 5.78E-14 | 6.51E-03 | 5.80E-02 | 2.58E-05 | 5.01E-11 |
| 117.96982 | 32.48  | 19.93 | 18.60 | 19.51 | 18.64 | 2.51E-14 | 1.26E-11 | 8.64E-02 | 1.48E-10 | 7.52E-06 | 9.96E-01 | 3.49E-05 |
| 117.99053 | 101.27 | 18.92 | 19.23 | 20.36 | 19.55 | 2.32E-16 | 2.05E-01 | 7.59E-14 | 6.39E-04 | 1.57E-10 | 2.06E-01 | 1.23E-05 |
| 118.01608 | 33.38  | 16.98 | 16.14 | 17.70 | 17.26 | 1.50E-10 | 4.33E-04 | 3.65E-03 | 5.79E-01 | 3.42E-11 | 5.51E-06 | 1.86E-01 |
| 118.03501 | 94.37  | 16.16 | 15.65 | 15.99 | 16.04 | 1.45E-01 | 1.05E-01 | 8.72E-01 | 9.57E-01 | 4.42E-01 | 3.45E-01 | 9.96E-01 |
| 118.03894 | 69.85  | 14.89 | 14.26 | 14.24 | 14.41 | 2.21E-01 | 2.88E-01 | 2.46E-01 | 5.52E-01 | 1.00E+00 | 9.79E-01 | 9.65E-01 |
| 118.04995 | 183.37 | 16.64 | 13.74 | 13.97 | 14.90 | 3.59E-40 | 3.65E-14 | 3.65E-14 | 7.35E-14 | 6.48E-01 | 1.31E-07 | 2.50E-05 |
| 118.05434 | 28.95  | 18.70 | 17.95 | 17.86 | 18.06 | 3.78E-02 | 8.89E-02 | 4.31E-02 | 2.03E-01 | 9.94E-01 | 9.89E-01 | 9.40E-01 |
| 118.06118 | 63.52  | 20.94 | 20.52 | 20.67 | 20.17 | 7.84E-07 | 8.00E-03 | 1.61E-01 | 1.72E-07 | 6.73E-01 | 5.70E-02 | 1.79E-03 |
| 118.06522 | 41.79  | 23.52 | 22.56 | 22.95 | 22.84 | 1.08E-20 | 6.47E-14 | 4.84E-09 | 1.71E-11 | 1.69E-04 | 1.74E-02 | 6.45E-01 |
| 118.06848 | 291.38 | 18.80 | 17.40 | 17.76 | 17.64 | 1.06E-06 | 1.70E-06 | 5.31E-04 | 1.65E-04 | 5.53E-01 | 8.27E-01 | 9.75E-01 |
| 118.07529 | 55.93  | 18.01 | 16.27 | 16.81 | 16.73 | 1.21E-31 | 3.65E-14 | 7.41E-14 | 7.24E-14 | 2.38E-04 | 3.32E-03 | 9.41E-01 |
| 118.08634 | 153.16 | 21.42 | 24.12 | 23.42 | 24.58 | 1.02E-22 | 7.32E-14 | 2.00E-10 | 6.81E-14 | 9.24E-02 | 4.27E-01 | 1.01E-03 |
| 118.09583 | 192.44 | 15.54 | 13.28 | 13.57 | 12.20 | 7.04E-13 | 3.99E-07 | 9.58E-06 | 3.43E-13 | 9.01E-01 | 5.61E-02 | 7.54E-03 |
| 118.1226  | 32.24  | 19.62 | 18.63 | 18.87 | 18.64 | 2.42E-07 | 2.25E-06 | 4.46E-04 | 5.21E-06 | 6.16E-01 | 1.00E+00 | 6.61E-01 |
| 118.12266 | 186.12 | 19.62 | 18.79 | 19.41 | 19.20 | 5.49E-01 | 4.88E-01 | 9.84E-01 | 8.94E-01 | 7.28E-01 | 9.14E-01 | 9.85E-01 |
| 118.51216 | 129.62 | 13.84 | 14.33 | 14.78 | 14.14 | 2.74E-01 | 7.51E-01 | 2.05E-01 | 9.35E-01 | 7.91E-01 | 9.83E-01 | 5.80E-01 |
| 118.88901 | 45.71  | 17.17 | 15.76 | 15.88 | 15.84 | 9.14E-47 | 3.65E-14 | 3.65E-14 | 3.65E-14 | 5.50E-01 | 8.27E-01 | 9.74E-01 |
| 118.92052 | 27.81  | 10.90 | 17.14 | 17.11 | 16.53 | 9.99E-59 | 3.65E-14 | 3.65E-14 | 3.65E-14 | 1.00E+00 | 2.70E-01 | 3.02E-01 |
| 118.92053 | 275.9  | 20.77 | 20.98 | 20.94 | 20.61 | 1.13E-01 | 5.34E-01 | 7.06E-01 | 7.66E-01 | 9.93E-01 | 1.23E-01 | 2.05E-01 |
| 118.96736 | 274.3  | 18.66 | 17.31 | 16.42 | 18.47 | 1.29E-06 | 1.35E-02 | 3.75E-06 | 9.76E-01 | 1.97E-01 | 6.61E-02 | 8.55E-05 |
| 118.9839  | 279.13 | 16.89 | 13.92 | 14.46 | 14.54 | 7.03E-15 | 1.65E-13 | 5.06E-10 | 6.57E-09 | 4.67E-01 | 3.71E-01 | 9.97E-01 |
| 118.9922  | 101.37 | 18.15 | 16.10 | 16.02 | 16.39 | 8.92E-15 | 1.17E-11 | 1.51E-12 | 1.30E-08 | 9.94E-01 | 7.53E-01 | 5.90E-01 |
| 118.9961  | 23.5   | 16.91 | 15.93 | 15.44 | 15.72 | 8.70E-15 | 3.30E-07 | 9.45E-14 | 1.55E-09 | 3.49E-02 | 6.84E-01 | 4.17E-01 |
| 119.00107 | 254.91 | 16.75 | 15.49 | 15.54 | 15.88 | 1.25E-14 | 1.04E-12 | 5.62E-12 | 1.93E-06 | 9.86E-01 | 9.66E-02 | 1.90E-01 |
| 119.00108 | 128.59 | 16.94 | 15.11 | 16.53 | 15.66 | 1.37E-14 | 1.77E-13 | 2.33E-01 | 3.71E-07 | 1.68E-08 | 9.35E-02 | 1.60E-03 |
| 119.01749 | 60.6   | 19.74 | 17.80 | 18.26 | 18.31 | 1.08E-12 | 2.44E-12 | 5.56E-08 | 4.32E-07 | 2.94E-01 | 2.35E-01 | 9.98E-01 |
| 119.03528 | 201.14 | 18.65 | 20.82 | 21.43 | 20.09 | 6.05E-23 | 8.16E-14 | 5.36E-14 | 3.94E-07 | 8.37E-02 | 3.14E-02 | 4.17E-06 |
| 119.04916 | 56.94  | 21.14 | 20.27 | 20.74 | 20.23 | 4.78E-20 | 7.45E-14 | 1.86E-04 | 7.42E-14 | 1.97E-05 | 9.85E-01 | 6.67E-06 |
| 119.0614  | 31.07  | 22.36 | 21.90 | 21.85 | 22.10 | 2.08E-03 | 9.07E-03 | 2.77E-03 | 3.11E-01 | 9.89E-01 | 5.47E-01 | 3.56E-01 |
| 119.06445 | 56.19  | 15.25 | 14.32 | 14.48 | 14.29 | 1.45E-02 | 3.00E-02 | 9.69E-02 | 2.90E-02 | 9.65E-01 | 1.00E+00 | 9.49E-01 |
| 119.06855 | 39.54  | 20.01 | 18.78 | 19.22 | 19.14 | 1.37E-30 | 3.65E-14 | 7.54E-14 | 7.39E-14 | 1.74E-05 | 9.45E-04 | 8.47E-01 |
| 119.07178 | 270.13 | 16.58 | 14.65 | 14.79 | 14.69 | 2.83E-12 | 7.28E-10 | 7.75E-09 | 3.94E-09 | 9.65E-01 | 9.99E-01 | 9.87E-01 |
| 119.07291 | 38.93  | 18.02 | 16.34 | 16.65 | 16.87 | 5.58E-41 | 3.65E-14 | 3.65E-14 | 6.18E-14 | 1.52E-02 | 1.24E-05 | 2.00E-01 |
| 119.08338 | 163.93 | 13.63 | 15.04 | 13.72 | 15.19 | 1.08E-03 | 1.97E-02 | 9.97E-01 | 9.48E-03 | 4.07E-02 | 9.90E-01 | 2.07E-02 |
| 119.08549 | 23.81  | 18.40 | 16.33 | 16.96 | 17.61 | 1.72E-32 | 3.65E-14 | 7.61E-14 | 1.57E-06 | 1.97E-04 | 1.42E-13 | 1.95E-04 |
| 119.08554 | 277.27 | 18.65 | 16.26 | 16.39 | 17.08 | 2.62E-16 | 1.04E-13 | 3.62E-13 | 1.03E-06 | 9.72E-01 | 3.45E-02 | 9.52E-02 |
| 119.08559 | 175.22 | 18.26 | 16.92 | 16.95 | 17.38 | 3.47E-10 | 8.00E-09 | 1.32E-08 | 4.37E-04 | 9.99E-01 | 1.66E-01 | 2.13E-01 |
| 119.08966 | 156.1  | 17.45 | 20.32 | 18.28 | 20.76 | 3.19E-15 | 2.64E-10 | 1.85E-01 | 1.61E-12 | 1.58E-05 | 7.49E-01 | 2.14E-07 |
| 119.09253 | 155.93 | 10.85 | 13.59 | 13.37 | 13.51 | 4.86E-12 | 8.63E-10 | 1.28E-08 | 6.99E-09 | 9.52E-01 | 9.97E-01 | 9.89E-01 |
| 119.12606 | 152.16 | 16.63 | 15.48 | 15.67 | 16.25 | 1.55E-11 | 1.74E-10 | 9.77E-08 | 1.22E-01 | 6.46E-01 | 7.40E-05 | 4.98E-03 |
| 119.51508 | 20.45  | 12.64 | 16.62 | 17.09 | 16.46 | 8.31E-50 | 3.65E-14 | 3.65E-14 | 3.65E-14 | 2.46E-01 | 9.34E-01 | 7.63E-02 |
| 119.51951 | 87.1   | 16.69 | 15.82 | 16.17 | 16.02 | 1.77E-03 | 1.12E-03 | 1.06E-01 | 2.40E-02 | 4.43E-01 | 8.52E-01 | 9.18E-01 |
| 119.89493 | 267.07 | 16.43 | 13.39 | 13.89 | 13.42 | 5.71E-14 | 1.39E-11 | 1.08E-08 | 5.87E-11 | 6.36E-01 | 1.00E+00 | 6.85E-01 |
| 119.92492 | 42.26  | 13.07 | 12.90 | 12.68 | 13.44 | 1.10E-01 | 9.39E-01 | 5.43E-01 | 6.28E-01 | 8.86E-01 | 3.23E-01 | 7.45E-02 |
| 119.95043 | 109.18 | 15.82 | 13.54 | 13.39 | 13.46 | 1.44E-06 | 7.72E-05 | 1.81E-05 | 6.33E-05 | 9.92E-01 | 9.99E-01 | 9.99E-01 |
| 119.98765 | 100    | 17.08 | 16.85 | 18.21 | 17.58 | 2.24E-13 | 5.37E-01 | 8.22E-10 | 2.30E-02 | 1.31E-12 | 4.08E-04 | 2.64E-03 |
| 119.99285 | 77.15  | 21.39 | 17.79 | 18.07 | 19.63 | 2.38E-56 | 3.65E-14 | 3.65E-14 | 7.38E-14 | 4.20E-01 | 7.36E-14 | 1.56E-13 |
| 120.00286 | 56.8   | 20.00 | 17.68 | 18.21 | 17.44 | 7.38E-27 | 6.63E-14 | 1.30E-13 | 4.59E-14 | 7.90E-02 | 7.20E-01 | 4.33E-03 |
| 120.00892 | 107.81 | 21.14 | 19.79 | 20.63 | 19.71 | 1.00E-18 | 9.48E-14 | 8.07E-03 | 7.78E-14 | 2.95E-06 | 9.71E-01 | 6.24E-07 |
| 120.00894 | 214.04 | 16.70 | 16.15 | 14.59 | 16.34 | 2.72E-09 | 3.27E-01 | 2.45E-09 | 7.12E-01 | 3.06E-05 | 9.40E-01 | 3.67E-06 |
| 120.01148 | 203.29 | 17.99 | 19.92 | 20.55 | 20.99 | 3.05E-24 | 3.42E-11 | 7.54E-14 | 5.72E-14 | 9.09E-02 | 9.05E-04 | 3.88E-01 |
| 120.01938 | 39.08  | 19.10 | 16.24 | 16.80 | 17.40 | 4.68E-34 | 3.65E-14 | 4.23E-14 | 1.22E-13 | 3.10E-02 | 5.89E-07 | 2.39E-02 |

|           |        |       |       |       |       |          |          |          |          |          |          |          |
|-----------|--------|-------|-------|-------|-------|----------|----------|----------|----------|----------|----------|----------|
| 120.02359 | 299.58 | 18.73 | 17.70 | 16.81 | 18.15 | 3.01E-13 | 1.06E-04 | 1.37E-13 | 7.96E-02 | 1.27E-03 | 2.71E-01 | 6.64E-07 |
| 120.03235 | 37.82  | 17.40 | 14.50 | 14.97 | 15.50 | 3.17E-36 | 3.65E-14 | 3.70E-14 | 7.38E-14 | 9.09E-02 | 1.61E-05 | 5.26E-02 |
| 120.03865 | 177.38 | 16.07 | 15.51 | 15.65 | 15.35 | 5.72E-02 | 1.64E-01 | 3.91E-01 | 4.69E-02 | 9.59E-01 | 9.41E-01 | 7.13E-01 |
| 120.03867 | 42.55  | 19.45 | 17.67 | 18.02 | 18.21 | 4.81E-15 | 9.60E-14 | 3.31E-10 | 1.56E-07 | 3.73E-01 | 7.67E-02 | 8.24E-01 |
| 120.04438 | 280.3  | 17.11 | 15.15 | 15.29 | 15.59 | 1.64E-22 | 7.36E-14 | 7.47E-14 | 2.20E-12 | 8.93E-01 | 1.38E-01 | 4.48E-01 |
| 120.04444 | 22.41  | 16.71 | 14.03 | 13.26 | 13.91 | 1.22E-29 | 7.43E-14 | 3.67E-14 | 7.41E-14 | 3.03E-02 | 9.78E-01 | 1.01E-01 |
| 120.05249 | 49.59  | 17.46 | 15.36 | 16.00 | 15.90 | 5.55E-35 | 3.65E-14 | 7.16E-14 | 6.52E-14 | 1.05E-04 | 2.30E-03 | 9.12E-01 |
| 120.05573 | 278.52 | 19.32 | 18.32 | 17.93 | 17.56 | 2.26E-11 | 1.96E-04 | 6.80E-08 | 4.74E-11 | 3.78E-01 | 1.55E-02 | 4.59E-01 |
| 120.06064 | 102.97 | 17.21 | 16.81 | 17.51 | 17.48 | 5.10E-04 | 1.09E-01 | 3.15E-01 | 4.43E-01 | 7.94E-04 | 2.29E-03 | 9.98E-01 |
| 120.06558 | 68.19  | 24.80 | 24.27 | 24.55 | 24.38 | 3.73E-10 | 4.64E-10 | 7.52E-03 | 1.48E-06 | 2.69E-03 | 5.66E-01 | 1.41E-01 |
| 120.08084 | 51.75  | 25.94 | 24.88 | 25.28 | 25.30 | 1.21E-29 | 3.65E-14 | 8.29E-14 | 2.68E-13 | 5.46E-06 | 4.31E-06 | 9.96E-01 |
| 120.0904  | 158.96 | 15.85 | 15.17 | 15.33 | 15.99 | 3.37E-03 | 3.34E-02 | 1.49E-01 | 9.37E-01 | 9.24E-01 | 9.87E-03 | 5.22E-02 |
| 120.09295 | 53.69  | 17.05 | 15.24 | 15.90 | 15.87 | 3.75E-14 | 8.28E-14 | 5.36E-07 | 8.15E-07 | 1.36E-02 | 2.49E-02 | 1.00E+00 |
| 120.10197 | 34.83  | 20.61 | 19.52 | 20.12 | 20.38 | 3.91E-07 | 1.58E-07 | 4.36E-02 | 6.37E-01 | 1.24E-02 | 1.49E-04 | 5.43E-01 |
| 120.49451 | 60.57  | 16.91 | 13.40 | 13.48 | 15.66 | 6.96E-24 | 7.32E-14 | 7.61E-14 | 3.08E-03 | 9.95E-01 | 1.85E-08 | 4.87E-08 |
| 120.50136 | 84.98  | 16.74 | 12.14 | 12.62 | 13.85 | 6.22E-50 | 3.65E-14 | 3.65E-14 | 5.01E-14 | 2.32E-01 | 2.70E-09 | 2.34E-05 |
| 120.51061 | 100.79 | 16.96 | 14.65 | 14.98 | 14.90 | 3.10E-40 | 3.65E-14 | 3.65E-14 | 3.65E-14 | 1.44E-01 | 4.08E-01 | 9.54E-01 |
| 120.51906 | 276.19 | 17.04 | 17.04 | 17.25 | 16.31 | 3.12E-02 | 1.00E+00 | 9.03E-01 | 1.07E-01 | 9.13E-01 | 1.23E-01 | 2.30E-02 |
| 120.52302 | 83.4   | 15.17 | 15.77 | 14.45 | 15.61 | 1.44E-04 | 1.95E-01 | 7.55E-02 | 4.91E-01 | 1.58E-04 | 9.57E-01 | 1.71E-01 |
| 120.94532 | 38.14  | 15.24 | 17.46 | 17.13 | 16.84 | 3.38E-33 | 3.65E-14 | 4.12E-14 | 7.47E-14 | 1.84E-01 | 1.71E-03 | 3.09E-01 |
| 120.95348 | 86.29  | 16.10 | 17.87 | 18.34 | 17.56 | 7.92E-19 | 2.49E-12 | 7.45E-14 | 1.82E-08 | 1.89E-01 | 5.65E-01 | 6.87E-03 |
| 120.96574 | 78.37  | 18.45 | 20.47 | 19.54 | 19.94 | 9.05E-30 | 3.65E-14 | 2.05E-11 | 7.39E-14 | 3.60E-08 | 4.84E-03 | 6.21E-02 |
| 120.98091 | 143.53 | 18.58 | 15.10 | 15.47 | 15.79 | 2.42E-27 | 4.19E-14 | 6.78E-14 | 7.44E-14 | 6.13E-01 | 1.29E-01 | 7.40E-01 |
| 120.98835 | 88.13  | 12.22 | 11.25 | 15.36 | 14.02 | 2.68E-10 | 3.71E-01 | 1.52E-06 | 1.88E-02 | 8.94E-10 | 1.08E-04 | 1.43E-01 |
| 120.99077 | 62.25  | 16.87 | 12.17 | 12.61 | 15.51 | 1.84E-29 | 4.05E-14 | 6.43E-14 | 5.49E-03 | 6.98E-01 | 6.01E-13 | 2.16E-10 |
| 120.99307 | 129.45 | 16.12 | 14.06 | 12.83 | 14.29 | 8.88E-13 | 4.50E-06 | 1.76E-13 | 9.74E-05 | 1.66E-02 | 9.49E-01 | 3.65E-03 |
| 121.01196 | 88.53  | 19.14 | 19.69 | 19.47 | 19.02 | 8.70E-02 | 1.98E-01 | 6.39E-01 | 9.70E-01 | 8.58E-01 | 1.00E-01 | 4.08E-01 |
| 121.01477 | 257.32 | 15.94 | 10.21 | 19.72 | 12.58 | 3.54E-22 | 8.24E-10 | 6.87E-05 | 8.82E-04 | 6.10E-14 | 4.48E-02 | 5.05E-13 |
| 121.02072 | 99.99  | 17.77 | 15.45 | 15.11 | 16.04 | 2.76E-18 | 2.78E-13 | 7.48E-14 | 8.64E-08 | 6.40E-01 | 2.07E-01 | 1.07E-02 |
| 121.02548 | 91.64  | 14.42 | 15.75 | 15.90 | 15.44 | 2.68E-06 | 7.02E-05 | 5.51E-06 | 5.15E-03 | 9.57E-01 | 7.61E-01 | 4.48E-01 |
| 121.02841 | 300.2  | 16.31 | 16.56 | 14.63 | 13.07 | 2.14E-07 | 9.79E-01 | 3.37E-02 | 4.48E-06 | 1.44E-02 | 1.59E-06 | 8.07E-02 |
| 121.02846 | 146.28 | 18.94 | 18.99 | 18.77 | 18.64 | 2.63E-01 | 9.92E-01 | 7.82E-01 | 4.05E-01 | 6.32E-01 | 2.84E-01 | 9.21E-01 |
| 121.0397  | 173.31 | 16.37 | 16.66 | 17.16 | 15.81 | 8.99E-06 | 6.32E-01 | 7.65E-03 | 1.26E-01 | 2.06E-01 | 7.02E-03 | 2.68E-06 |
| 121.03971 | 30.27  | 18.28 | 17.53 | 17.49 | 17.88 | 6.17E-08 | 2.00E-06 | 4.05E-07 | 3.16E-02 | 9.94E-01 | 1.02E-01 | 5.21E-02 |
| 121.06481 | 273.58 | 17.73 | 16.17 | 15.65 | 16.39 | 3.04E-22 | 1.77E-13 | 5.72E-14 | 3.74E-10 | 3.87E-02 | 6.89E-01 | 1.38E-03 |
| 121.06886 | 71.2   | 20.46 | 20.12 | 20.30 | 20.15 | 1.76E-03 | 2.61E-03 | 3.44E-01 | 9.34E-03 | 2.50E-01 | 9.92E-01 | 4.23E-01 |
| 121.0761  | 175    | 16.80 | 13.65 | 13.40 | 14.40 | 2.74E-48 | 3.65E-14 | 3.65E-14 | 3.81E-14 | 6.06E-01 | 1.55E-03 | 9.45E-06 |
| 121.07777 | 38.51  | 17.22 | 14.90 | 15.45 | 15.81 | 9.43E-50 | 3.65E-14 | 3.65E-14 | 4.61E-14 | 4.95E-05 | 4.34E-11 | 2.43E-02 |
| 121.08419 | 49.19  | 22.31 | 21.33 | 21.77 | 21.62 | 7.36E-24 | 4.16E-14 | 2.52E-09 | 4.39E-13 | 2.87E-06 | 5.04E-03 | 3.41E-01 |
| 121.08746 | 197.69 | 16.34 | 13.42 | 14.08 | 13.99 | 5.42E-35 | 3.65E-14 | 5.18E-14 | 5.12E-14 | 1.03E-02 | 4.71E-02 | 9.74E-01 |
| 121.10113 | 24.3   | 17.90 | 16.25 | 16.69 | 17.30 | 3.43E-30 | 3.65E-14 | 7.45E-14 | 2.54E-05 | 3.88E-03 | 5.37E-13 | 2.72E-05 |
| 121.10118 | 286.84 | 18.72 | 16.89 | 16.78 | 17.09 | 7.80E-13 | 7.23E-10 | 4.40E-11 | 1.07E-07 | 9.78E-01 | 8.90E-01 | 6.80E-01 |
| 121.10123 | 176.51 | 18.43 | 17.03 | 17.48 | 17.76 | 3.40E-11 | 8.96E-12 | 3.78E-06 | 3.27E-03 | 8.65E-02 | 1.50E-03 | 4.82E-01 |
| 121.5096  | 96.07  | 16.20 | 14.29 | 15.08 | 14.49 | 1.15E-06 | 2.31E-06 | 1.17E-02 | 4.71E-05 | 1.52E-01 | 9.57E-01 | 4.11E-01 |
| 121.52052 | 80.63  | 19.79 | 17.06 | 17.89 | 17.17 | 5.24E-23 | 7.14E-14 | 2.98E-11 | 7.63E-14 | 1.12E-02 | 9.79E-01 | 4.44E-02 |
| 121.52617 | 96.7   | 17.43 | 16.07 | 15.97 | 15.93 | 5.30E-10 | 5.83E-07 | 6.08E-08 | 7.24E-08 | 9.82E-01 | 9.51E-01 | 9.98E-01 |
| 121.53564 | 85.87  | 15.60 | 15.93 | 16.08 | 16.23 | 8.32E-03 | 2.83E-01 | 5.08E-02 | 6.02E-03 | 8.75E-01 | 4.28E-01 | 8.56E-01 |
| 121.5702  | 69.69  | 15.14 | 14.63 | 14.52 | 15.41 | 2.44E-02 | 3.77E-01 | 2.04E-01 | 8.27E-01 | 9.87E-01 | 9.09E-02 | 3.80E-02 |
| 121.95789 | 286    | 20.64 | 18.63 | 18.99 | 18.34 | 9.67E-17 | 1.90E-12 | 4.52E-09 | 8.15E-14 | 5.28E-01 | 7.08E-01 | 7.96E-02 |
| 121.95795 | 125.89 | 18.38 | 15.64 | 15.74 | 16.61 | 5.46E-13 | 2.67E-11 | 9.07E-11 | 3.86E-05 | 9.93E-01 | 7.27E-02 | 1.26E-01 |
| 121.96616 | 22.94  | 21.14 | 19.77 | 20.35 | 20.46 | 5.14E-32 | 3.65E-14 | 8.70E-14 | 8.45E-11 | 3.67E-08 | 2.49E-10 | 6.88E-01 |
| 121.9662  | 182.98 | 19.26 | 21.98 | 21.84 | 21.42 | 3.81E-10 | 9.02E-09 | 3.79E-08 | 1.12E-05 | 9.89E-01 | 6.18E-01 | 7.96E-01 |
| 121.98513 | 90.55  | 13.97 | 14.17 | 16.03 | 15.54 | 1.28E-04 | 9.80E-01 | 5.28E-04 | 1.87E-02 | 3.40E-03 | 6.45E-02 | 8.14E-01 |
| 121.99174 | 33.21  | 16.30 | 13.69 | 13.69 | 15.12 | 1.95E-25 | 6.81E-14 | 6.56E-14 | 2.56E-05 | 1.00E+00 | 6.80E-07 | 5.23E-07 |
| 121.99193 | 266.73 | 15.16 | 9.97  | 9.84  | 12.10 | 2.35E-19 | 7.53E-14 | 7.41E-14 | 3.33E-06 | 9.96E-01 | 3.31E-03 | 1.41E-01 |
| 122.00027 | 125.99 | 16.55 | 16.79 | 17.35 | 17.05 | 1.01E-05 | 4.45E-01 | 4.99E-06 | 1.24E-02 | 3.74E-03 | 3.93E-01 | 2.89E-01 |
| 122.00723 | 191.01 | 11.78 | 13.58 | 13.59 | 14.13 | 1.90E-04 | 6.41E-03 | 5.45E-03 | 2.41E-04 | 1.00E+00 | 7.78E-01 | 7.83E-01 |
| 122.00986 | 100.1  | 14.20 | 14.17 | 14.16 | 14.20 | 1.00E+00 |
| 122.01925 | 300.86 | 19.70 | 19.37 | 18.77 | 19.47 | 1.90E-02 | 6.90E-01 | 1.07E-02 | 8.83E-01 | 2.09E-01 | 9.88E-01 | 1.18E-01 |
| 122.0222  | 90.86  | 16.49 | 13.91 | 15.16 | 13.99 | 8.10E-09 | 8.39E-08 | 1.29E-02 | 4.60E-07 | 2.93E-02 | 9.98E-01 | 5.64E-02 |
| 122.02765 | 84.35  | 21.81 | 20.77 | 21.04 | 20.87 | 2.02E-04 | 3.35E-04 | 1.37E-02 | 2.21E-03 | 7.16E-01 | 9.81E-01 | 9.18E-01 |
| 122.03179 | 209.07 | 16.26 | 13.08 | 13.51 | 13.25 | 1.76E-34 | 3.65E-14 | 4.34E-14 | 3.74E-14 | 3.10E-01 | 9.16E-01 | 7.30E-01 |
| 122.03635 | 260.89 | 16.92 | 12.17 | 12.33 | 13.60 | 1.89E-38 | 3.65E-14 | 3.65E-14 | 7.24E-14 | 9.59E-01 | 2.83E-04 | 1.59E-03 |
| 122.04744 | 32.15  | 17.09 | 15.49 | 15.78 | 15.97 | 1.37E-13 | 5.89E-13 | 2.16E-09 | 9.97E-07 | 4.84E-01 | 1.05E-01 | 7.98E-01 |
| 122.06007 | 289.2  | 17.92 | 16.92 | 16.84 | 16.84 | 3.68E-07 | 4.41E-05 | 6.70E-06 | 1.53E-05 | 9.84E-01 | 9.86E-01 | 1.00E+00 |
| 122.06572 | 157.63 | 10.01 | 14.69 | 14.84 | 14.51 | 1.17E-52 | 3.65E-14 | 3.65E-14 | 3.65E-14 | 9.42E-01 | 9.23E-01 | 6.37E-01 |
| 122.07134 | 275.71 | 17.74 | 15.50 | 15.90 | 16.00 | 7.43E-22 | 7.14E-14 | 8.19E-14 | 7.78E-13 | 2.71E-01 | 1.32E-01 | 9.73E-01 |
| 122.08756 | 39.99  | 17.18 | 14.82 | 15.45 | 15.78 | 4.24E-57 | 3.65E-14 | 3.65E-14 | 3.67E-14 | 1.84E-07 | 9.08E-14 | 1.61E-02 |

|           |        |       |       |       |       |          |          |          |          |          |          |          |
|-----------|--------|-------|-------|-------|-------|----------|----------|----------|----------|----------|----------|----------|
| 122.09648 | 184.86 | 16.60 | 14.21 | 14.43 | 14.77 | 1.48E-42 | 3.65E-14 | 3.65E-14 | 3.90E-14 | 4.99E-01 | 3.13E-03 | 1.37E-01 |
| 122.10455 | 206.47 | 15.57 | 12.67 | 13.48 | 13.34 | 1.46E-10 | 1.98E-10 | 4.88E-06 | 2.32E-06 | 2.26E-01 | 4.23E-01 | 9.88E-01 |
| 122.51084 | 111.04 | 16.31 | 13.73 | 15.05 | 13.96 | 1.09E-12 | 1.50E-11 | 1.82E-03 | 1.91E-09 | 1.48E-03 | 9.25E-01 | 1.61E-02 |
| 122.52034 | 92.64  | 15.70 | 16.08 | 16.25 | 15.87 | 1.63E-01 | 4.53E-01 | 1.36E-01 | 9.25E-01 | 9.15E-01 | 8.58E-01 | 4.80E-01 |
| 122.53387 | 70.57  | 16.44 | 15.28 | 15.42 | 15.18 | 9.07E-03 | 2.68E-02 | 6.19E-02 | 1.70E-02 | 9.88E-01 | 9.96E-01 | 9.48E-01 |
| 122.537   | 88.29  | 20.76 | 22.93 | 23.24 | 22.67 | 3.86E-28 | 6.85E-14 | 3.76E-14 | 7.43E-14 | 4.49E-01 | 6.43E-01 | 4.46E-02 |
| 122.57391 | 86.88  | 16.81 | 15.73 | 16.08 | 16.01 | 2.51E-10 | 1.81E-10 | 1.86E-05 | 5.39E-06 | 1.24E-01 | 3.20E-01 | 9.74E-01 |
| 122.92457 | 45.01  | 22.63 | 23.42 | 23.40 | 23.50 | 3.62E-24 | 7.36E-14 | 7.32E-14 | 7.16E-14 | 9.98E-01 | 7.84E-01 | 6.71E-01 |
| 122.96444 | 26.52  | 16.14 | 9.58  | 10.56 | 11.55 | 6.71E-64 | 3.65E-14 | 3.65E-14 | 3.65E-14 | 4.39E-03 | 1.84E-09 | 5.50E-03 |
| 122.97297 | 55.14  | 20.15 | 18.05 | 19.39 | 17.31 | 4.77E-21 | 2.64E-12 | 2.84E-02 | 7.41E-14 | 1.58E-05 | 5.75E-02 | 3.99E-11 |
| 122.99038 | 128.92 | 13.32 | 11.34 | 13.00 | 13.62 | 4.34E-04 | 2.08E-03 | 9.33E-01 | 9.52E-01 | 1.81E-02 | 6.55E-04 | 7.02E-01 |
| 123.01059 | 194.37 | 13.84 | 14.03 | 14.45 | 15.01 | 1.45E-03 | 9.21E-01 | 1.74E-01 | 1.12E-03 | 5.25E-01 | 1.27E-02 | 2.90E-01 |
| 123.01466 | 20.51  | 17.47 | 9.75  | 10.36 | 11.58 | 9.26E-92 | 3.65E-14 | 3.65E-14 | 3.65E-14 | 6.37E-02 | 3.45E-11 | 1.05E-05 |
| 123.01659 | 87.02  | 16.29 | 16.17 | 16.67 | 16.55 | 1.02E-02 | 8.78E-01 | 7.94E-02 | 3.79E-01 | 1.35E-02 | 1.11E-01 | 8.97E-01 |
| 123.026   | 64.79  | 16.52 | 13.74 | 14.93 | 14.23 | 1.13E-13 | 3.21E-13 | 3.22E-05 | 3.44E-09 | 4.61E-03 | 5.32E-01 | 2.14E-01 |
| 123.03906 | 89.65  | 21.82 | 22.92 | 23.09 | 22.83 | 1.17E-09 | 7.56E-07 | 5.75E-09 | 1.13E-05 | 8.30E-01 | 9.76E-01 | 5.98E-01 |
| 123.04411 | 55.01  | 21.63 | 20.77 | 21.24 | 20.74 | 3.55E-17 | 1.46E-13 | 1.10E-03 | 1.17E-13 | 9.00E-05 | 9.92E-01 | 4.21E-05 |
| 123.05532 | 40.75  | 29.41 | 28.45 | 28.37 | 28.77 | 8.10E-32 | 3.87E-14 | 3.65E-14 | 1.62E-12 | 7.39E-01 | 1.11E-03 | 1.62E-05 |
| 123.06597 | 232.56 | 16.80 | 15.61 | 13.65 | 15.37 | 3.31E-10 | 3.45E-02 | 3.14E-11 | 8.49E-03 | 1.01E-04 | 9.53E-01 | 1.26E-03 |
| 123.08028 | 284.54 | 18.36 | 17.58 | 17.37 | 17.60 | 5.04E-03 | 4.21E-02 | 4.49E-03 | 5.80E-02 | 9.00E-01 | 1.00E+00 | 8.85E-01 |
| 123.08449 | 292.74 | 17.59 | 17.63 | 17.29 | 17.87 | 3.84E-01 | 9.99E-01 | 7.76E-01 | 8.16E-01 | 7.19E-01 | 8.87E-01 | 2.97E-01 |
| 123.09172 | 172.57 | 17.05 | 15.46 | 16.28 | 15.72 | 1.15E-16 | 7.55E-14 | 1.11E-04 | 2.48E-11 | 5.37E-05 | 5.17E-01 | 1.37E-02 |
| 123.11678 | 24.34  | 17.88 | 16.62 | 16.99 | 17.63 | 1.44E-24 | 5.38E-14 | 6.55E-13 | 1.29E-01 | 7.71E-03 | 1.03E-13 | 1.28E-06 |
| 123.11683 | 277.43 | 19.19 | 16.57 | 16.19 | 17.36 | 3.48E-19 | 1.15E-13 | 7.32E-14 | 2.19E-07 | 6.22E-01 | 8.50E-02 | 2.42E-03 |
| 123.11687 | 173.86 | 18.35 | 17.35 | 17.79 | 17.74 | 2.36E-05 | 5.73E-06 | 2.34E-02 | 1.50E-02 | 1.41E-01 | 2.59E-01 | 9.95E-01 |
| 123.48355 | 270.54 | 16.37 | 9.35  | 9.77  | 11.27 | 1.72E-34 | 3.65E-14 | 3.65E-14 | 7.49E-14 | 8.59E-01 | 2.93E-03 | 3.01E-02 |
| 123.48781 | 88.35  | 15.07 | 15.49 | 15.54 | 15.09 | 2.12E-02 | 1.20E-01 | 6.63E-02 | 1.00E+00 | 9.96E-01 | 1.87E-01 | 1.14E-01 |
| 123.51494 | 85.34  | 19.85 | 20.59 | 20.58 | 19.96 | 2.18E-02 | 6.89E-02 | 7.33E-02 | 9.87E-01 | 1.00E+00 | 1.90E-01 | 2.01E-01 |
| 123.52192 | 195.88 | 13.89 | 14.24 | 14.32 | 15.00 | 6.49E-02 | 8.13E-01 | 7.07E-01 | 3.56E-02 | 9.98E-01 | 2.77E-01 | 3.56E-01 |
| 123.52813 | 93.69  | 16.75 | 17.68 | 18.56 | 17.30 | 2.99E-10 | 1.79E-03 | 5.75E-11 | 1.56E-01 | 4.62E-03 | 4.89E-01 | 2.33E-05 |
| 123.53578 | 85.34  | 17.88 | 19.91 | 20.36 | 19.78 | 4.49E-32 | 5.81E-14 | 3.65E-14 | 7.47E-14 | 8.64E-02 | 9.06E-01 | 1.62E-02 |
| 123.53909 | 86.9   | 15.45 | 16.43 | 17.03 | 16.63 | 3.45E-12 | 2.00E-05 | 1.91E-12 | 3.41E-07 | 2.43E-02 | 7.80E-01 | 2.62E-01 |
| 123.54909 | 70.2   | 16.10 | 14.35 | 15.62 | 14.69 | 3.26E-09 | 1.86E-08 | 3.19E-01 | 1.50E-05 | 1.11E-04 | 6.59E-01 | 1.15E-02 |
| 123.56758 | 119.86 | 16.69 | 16.24 | 17.16 | 16.57 | 1.08E-05 | 4.45E-02 | 3.37E-02 | 8.93E-01 | 2.49E-06 | 2.77E-01 | 6.65E-03 |
| 123.59429 | 60.57  | 20.46 | 21.74 | 21.87 | 21.31 | 6.54E-15 | 2.18E-11 | 1.71E-13 | 2.14E-05 | 8.65E-01 | 9.17E-02 | 1.09E-02 |
| 123.92788 | 45.06  | 16.45 | 15.39 | 15.41 | 15.98 | 1.61E-13 | 3.03E-11 | 4.70E-11 | 9.72E-03 | 9.99E-01 | 9.33E-04 | 1.36E-03 |
| 123.95476 | 280.7  | 19.67 | 17.04 | 17.79 | 17.32 | 3.98E-18 | 7.43E-14 | 1.32E-09 | 4.67E-13 | 5.35E-02 | 7.83E-01 | 4.09E-01 |
| 123.96434 | 22.55  | 20.00 | 18.45 | 19.00 | 19.12 | 6.51E-35 | 3.65E-14 | 7.32E-14 | 8.92E-14 | 2.09E-06 | 1.37E-08 | 6.52E-01 |
| 123.99818 | 137.03 | 16.35 | 14.39 | 14.14 | 14.41 | 7.65E-19 | 3.33E-13 | 7.36E-14 | 1.78E-12 | 7.64E-01 | 1.00E+00 | 7.24E-01 |
| 124.0156  | 267.22 | 19.91 | 21.75 | 21.72 | 20.69 | 3.37E-38 | 3.65E-14 | 3.65E-14 | 1.09E-07 | 9.94E-01 | 2.77E-12 | 8.81E-12 |
| 124.02426 | 82.41  | 18.21 | 18.78 | 18.83 | 18.89 | 6.69E-08 | 3.87E-05 | 3.73E-06 | 1.02E-06 | 9.69E-01 | 8.18E-01 | 9.72E-01 |
| 124.02887 | 99.58  | 17.88 | 15.99 | 15.96 | 16.19 | 3.33E-24 | 7.32E-14 | 7.07E-14 | 7.69E-14 | 9.99E-01 | 7.49E-01 | 6.53E-01 |
| 124.03377 | 24.95  | 16.04 | 14.69 | 14.43 | 15.52 | 1.49E-12 | 2.71E-08 | 2.08E-11 | 1.05E-01 | 6.51E-01 | 2.62E-03 | 2.52E-05 |
| 124.03946 | 274.63 | 20.24 | 18.86 | 18.57 | 18.61 | 1.90E-06 | 5.35E-04 | 1.15E-05 | 4.37E-05 | 8.34E-01 | 9.01E-01 | 9.99E-01 |
| 124.04376 | 95.53  | 17.32 | 17.41 | 17.93 | 17.68 | 7.22E-03 | 9.65E-01 | 7.17E-03 | 2.46E-01 | 3.85E-02 | 5.24E-01 | 5.98E-01 |
| 124.0474  | 49.82  | 17.96 | 15.84 | 16.52 | 16.24 | 1.81E-41 | 3.65E-14 | 4.76E-14 | 3.65E-14 | 3.85E-06 | 1.97E-02 | 1.74E-01 |
| 124.05229 | 46.3   | 21.74 | 21.32 | 21.47 | 21.41 | 6.89E-06 | 4.33E-06 | 6.82E-03 | 9.55E-04 | 2.67E-01 | 6.87E-01 | 9.12E-01 |
| 124.05851 | 37.3   | 25.23 | 24.60 | 24.66 | 24.84 | 4.63E-12 | 4.65E-11 | 2.11E-09 | 1.32E-04 | 8.95E-01 | 4.47E-02 | 2.04E-01 |
| 124.07569 | 291    | 17.26 | 16.05 | 15.94 | 15.90 | 1.89E-12 | 1.85E-08 | 6.75E-10 | 8.56E-10 | 9.55E-01 | 9.01E-01 | 9.98E-01 |
| 124.08696 | 57.93  | 21.27 | 18.93 | 18.84 | 18.78 | 5.49E-50 | 3.65E-14 | 3.65E-14 | 3.65E-14 | 9.38E-01 | 7.86E-01 | 9.82E-01 |
| 124.09596 | 61.83  | 17.45 | 18.40 | 18.61 | 18.01 | 8.25E-20 | 2.39E-13 | 7.41E-14 | 2.72E-05 | 2.95E-01 | 1.02E-02 | 1.16E-05 |
| 124.11208 | 196.13 | 16.02 | 13.75 | 13.74 | 14.13 | 3.37E-35 | 3.65E-14 | 3.65E-14 | 6.56E-14 | 1.00E+00 | 1.58E-01 | 1.51E-01 |
| 124.1202  | 194.92 | 16.08 | 12.75 | 13.12 | 13.55 | 1.03E-19 | 7.49E-14 | 8.18E-14 | 9.84E-11 | 7.31E-01 | 1.35E-01 | 6.38E-01 |
| 124.51258 | 111.04 | 17.17 | 15.46 | 15.15 | 15.16 | 4.08E-15 | 2.32E-09 | 1.40E-12 | 8.31E-12 | 6.53E-01 | 6.92E-01 | 1.00E+00 |
| 124.52692 | 97     | 13.69 | 14.29 | 15.36 | 14.32 | 3.46E-05 | 2.97E-01 | 7.92E-06 | 2.74E-01 | 1.19E-02 | 1.00E+00 | 1.96E-02 |
| 124.53051 | 254.73 | 18.54 | 16.33 | 16.27 | 16.56 | 8.85E-25 | 7.44E-14 | 6.83E-14 | 7.63E-14 | 9.92E-01 | 7.57E-01 | 5.83E-01 |
| 124.53075 | 82.56  | 20.20 | 21.19 | 21.21 | 20.84 | 4.56E-04 | 1.46E-03 | 1.09E-03 | 9.38E-02 | 1.00E+00 | 5.97E-01 | 5.64E-01 |
| 124.53874 | 89.96  | 15.79 | 15.24 | 15.57 | 15.69 | 1.00E-01 | 7.38E-02 | 7.62E-01 | 9.73E-01 | 4.82E-01 | 2.40E-01 | 9.59E-01 |
| 124.92266 | 45.18  | 19.97 | 20.60 | 20.65 | 20.64 | 5.01E-14 | 6.81E-10 | 2.00E-11 | 2.18E-10 | 9.55E-01 | 9.84E-01 | 9.99E-01 |
| 124.92877 | 44.66  | 14.45 | 13.61 | 13.99 | 14.03 | 4.69E-02 | 2.32E-02 | 3.86E-01 | 5.03E-01 | 5.87E-01 | 5.27E-01 | 9.99E-01 |
| 124.93758 | 101.33 | 13.42 | 14.67 | 12.14 | 14.73 | 3.36E-10 | 1.00E-02 | 6.87E-03 | 8.11E-03 | 1.37E-08 | 9.99E-01 | 1.44E-08 |
| 124.95619 | 268.92 | 17.51 | 13.09 | 14.90 | 14.27 | 6.15E-21 | 6.61E-14 | 5.25E-09 | 3.29E-12 | 1.55E-04 | 3.62E-02 | 4.67E-01 |
| 124.97111 | 56.48  | 16.33 | 12.25 | 13.77 | 12.32 | 7.71E-18 | 7.51E-14 | 3.70E-07 | 9.80E-14 | 7.94E-03 | 9.99E-01 | 1.66E-02 |
| 124.99106 | 65.05  | 15.83 | 14.85 | 16.30 | 16.42 | 6.20E-02 | 3.73E-01 | 8.61E-01 | 7.81E-01 | 9.32E-02 | 7.28E-02 | 9.98E-01 |
| 124.99981 | 278.21 | 15.78 | 18.95 | 15.57 | 17.31 | 1.47E-09 | 6.80E-08 | 9.77E-01 | 2.95E-02 | 1.73E-08 | 2.10E-02 | 1.13E-02 |
| 124.99991 | 91.64  | 22.00 | 22.53 | 22.74 | 22.19 | 2.96E-10 | 1.37E-05 | 8.47E-10 | 3.42E-01 | 2.88E-01 | 1.76E-02 | 2.47E-05 |
| 125.02093 | 52.9   | 18.96 | 17.58 | 18.71 | 17.64 | 3.70E-21 | 7.38E-14 | 3.22E-01 | 9.80E-14 | 6.31E-11 | 9.86E-01 | 1.28E-09 |
| 125.02348 | 175.3  | 17.42 | 14.53 | 14.61 | 15.35 | 1.12E-39 | 3.65E-14 | 3.65E-14 | 7.12E-14 | 9.83E-01 | 5.79E-04 | 1.93E-03 |

|           |        |       |       |       |       |          |          |          |          |          |          |          |
|-----------|--------|-------|-------|-------|-------|----------|----------|----------|----------|----------|----------|----------|
| 125.03181 | 85.02  | 16.47 | 17.16 | 16.86 | 16.86 | 6.93E-02 | 3.79E-02 | 4.30E-01 | 4.47E-01 | 6.51E-01 | 6.89E-01 | 1.00E+00 |
| 125.03797 | 97.16  | 19.56 | 19.78 | 20.23 | 19.98 | 2.84E-03 | 6.17E-01 | 1.45E-03 | 1.12E-01 | 7.86E-02 | 7.29E-01 | 5.61E-01 |
| 125.0451  | 92.05  | 16.57 | 18.20 | 17.99 | 18.05 | 7.79E-11 | 2.38E-09 | 1.59E-07 | 1.34E-07 | 8.47E-01 | 9.43E-01 | 9.96E-01 |
| 125.05562 | 32.05  | 17.43 | 16.11 | 16.31 | 16.50 | 3.68E-40 | 3.65E-14 | 3.65E-14 | 6.27E-14 | 8.55E-02 | 8.79E-05 | 1.40E-01 |
| 125.05945 | 31.29  | 19.95 | 19.23 | 19.43 | 19.38 | 1.59E-15 | 8.09E-14 | 8.57E-09 | 1.20E-09 | 8.84E-02 | 3.13E-01 | 9.44E-01 |
| 125.06186 | 31.46  | 19.69 | 18.98 | 19.13 | 19.13 | 2.04E-16 | 7.64E-14 | 1.90E-10 | 5.19E-10 | 2.49E-01 | 3.11E-01 | 1.00E+00 |
| 125.0709  | 289.52 | 21.20 | 20.46 | 20.12 | 21.02 | 1.10E-02 | 1.59E-01 | 1.22E-02 | 9.55E-01 | 7.82E-01 | 4.54E-01 | 7.87E-02 |
| 125.09031 | 48.19  | 16.99 | 15.19 | 14.76 | 16.71 | 7.60E-03 | 8.22E-02 | 1.61E-02 | 9.83E-01 | 9.43E-01 | 2.30E-01 | 6.76E-02 |
| 125.09609 | 22.18  | 18.14 | 15.91 | 16.27 | 16.57 | 4.68E-36 | 3.65E-14 | 3.72E-14 | 7.44E-14 | 9.93E-02 | 4.08E-04 | 2.60E-01 |
| 125.0961  | 283.9  | 19.29 | 17.37 | 17.31 | 17.57 | 8.56E-19 | 8.60E-14 | 7.64E-14 | 1.00E-11 | 9.94E-01 | 8.38E-01 | 6.95E-01 |
| 125.10733 | 22.66  | 18.23 | 16.98 | 16.86 | 16.83 | 5.84E-09 | 4.00E-06 | 3.10E-07 | 4.38E-07 | 9.68E-01 | 9.42E-01 | 9.99E-01 |
| 125.10738 | 174.82 | 16.79 | 14.65 | 15.17 | 15.12 | 1.51E-29 | 3.65E-14 | 7.47E-14 | 7.47E-14 | 1.39E-02 | 3.87E-02 | 9.94E-01 |
| 125.13246 | 21.69  | 16.52 | 12.46 | 13.16 | 14.12 | 9.74E-48 | 3.65E-14 | 3.65E-14 | 6.87E-14 | 1.16E-02 | 8.67E-11 | 2.63E-04 |
| 125.13252 | 173.07 | 17.28 | 14.30 | 14.80 | 15.36 | 1.85E-45 | 3.65E-14 | 3.65E-14 | 5.72E-14 | 2.21E-02 | 7.38E-08 | 9.91E-03 |
| 125.49305 | 254.5  | 16.05 | 15.19 | 15.61 | 15.75 | 1.17E-02 | 5.01E-03 | 3.06E-01 | 6.50E-01 | 3.80E-01 | 1.74E-01 | 9.58E-01 |
| 125.49308 | 133.63 | 17.06 | 16.43 | 17.18 | 16.87 | 3.08E-02 | 7.59E-02 | 9.61E-01 | 8.90E-01 | 2.53E-02 | 3.86E-01 | 6.49E-01 |
| 125.50561 | 19.93  | 18.10 | 12.79 | 13.41 | 13.84 | 5.38E-53 | 3.65E-14 | 3.65E-14 | 3.65E-14 | 1.39E-01 | 2.54E-03 | 4.48E-01 |
| 125.51111 | 116.05 | 14.72 | 14.40 | 13.40 | 13.70 | 9.94E-02 | 9.44E-01 | 1.03E-01 | 3.25E-01 | 3.42E-01 | 6.77E-01 | 9.59E-01 |
| 125.51608 | 39.75  | 16.31 | 14.43 | 15.64 | 15.09 | 4.34E-05 | 1.83E-05 | 3.11E-01 | 1.43E-02 | 1.57E-02 | 3.91E-01 | 5.43E-01 |
| 125.52943 | 67.78  | 15.82 | 17.01 | 17.34 | 17.29 | 1.44E-12 | 3.89E-07 | 6.36E-11 | 9.39E-10 | 4.51E-01 | 6.11E-01 | 9.97E-01 |
| 125.54708 | 85.19  | 19.79 | 22.72 | 22.64 | 22.10 | 1.90E-29 | 3.94E-14 | 4.19E-14 | 7.51E-14 | 9.90E-01 | 8.96E-02 | 1.65E-01 |
| 125.9536  | 283.65 | 18.97 | 16.56 | 17.12 | 16.46 | 2.36E-20 | 7.38E-14 | 7.26E-11 | 7.36E-14 | 1.59E-01 | 9.82E-01 | 7.59E-02 |
| 125.96422 | 272.25 | 19.54 | 14.77 | 14.66 | 16.21 | 3.43E-47 | 3.65E-14 | 3.65E-14 | 5.12E-14 | 9.83E-01 | 2.21E-05 | 3.52E-06 |
| 125.98625 | 273.41 | 25.54 | 23.91 | 24.07 | 24.33 | 6.62E-12 | 1.02E-10 | 3.59E-09 | 3.69E-06 | 9.09E-01 | 3.12E-01 | 6.95E-01 |
| 125.9863  | 120.16 | 24.88 | 22.91 | 23.30 | 23.07 | 5.92E-23 | 7.43E-14 | 7.45E-14 | 7.39E-14 | 8.69E-01 | 9.94E-01 | 7.49E-01 |
| 125.9863  | 29.07  | 24.10 | 25.36 | 25.26 | 25.39 | 8.90E-23 | 7.16E-14 | 1.05E-13 | 7.27E-14 | 1.96E-01 | 8.71E-01 | 6.47E-01 |
| 126.00412 | 32.17  | 14.36 | 13.17 | 12.53 | 13.19 | 5.78E-10 | 5.11E-05 | 1.33E-10 | 1.24E-04 | 8.51E-02 | 1.00E+00 | 7.89E-02 |
| 126.00742 | 36.43  | 16.68 | 16.67 | 18.77 | 16.46 | 2.23E-14 | 1.00E+00 | 4.56E-11 | 8.83E-01 | 1.78E-10 | 8.94E-01 | 7.09E-12 |
| 126.022   | 78.1   | 27.33 | 27.18 | 27.11 | 27.48 | 9.37E-02 | 7.28E-01 | 4.34E-01 | 7.76E-01 | 9.70E-01 | 2.30E-01 | 8.91E-02 |
| 126.0256  | 41.16  | 16.49 | 14.20 | 15.22 | 13.85 | 1.10E-05 | 2.20E-04 | 8.60E-02 | 2.40E-05 | 2.69E-01 | 9.29E-01 | 8.30E-02 |
| 126.0307  | 77.07  | 17.74 | 19.76 | 19.68 | 19.42 | 2.22E-21 | 7.35E-14 | 7.42E-14 | 1.17E-12 | 9.77E-01 | 4.07E-01 | 6.48E-01 |
| 126.04355 | 83.32  | 15.94 | 15.20 | 15.10 | 15.70 | 5.68E-03 | 3.39E-02 | 1.01E-02 | 8.34E-01 | 9.82E-01 | 2.92E-01 | 1.42E-01 |
| 126.04741 | 88.09  | 17.51 | 19.50 | 19.43 | 19.16 | 2.50E-21 | 7.47E-14 | 7.45E-14 | 1.55E-12 | 9.90E-01 | 4.12E-01 | 5.88E-01 |
| 126.05492 | 283.39 | 21.02 | 19.70 | 19.92 | 20.18 | 5.23E-03 | 4.71E-03 | 2.54E-02 | 1.60E-01 | 9.45E-01 | 6.47E-01 | 9.20E-01 |
| 126.06626 | 182.84 | 17.00 | 14.33 | 14.34 | 14.76 | 7.72E-46 | 3.65E-14 | 3.65E-14 | 3.65E-14 | 1.00E+00 | 7.01E-02 | 6.95E-02 |
| 126.07432 | 283.55 | 17.77 | 15.11 | 14.82 | 15.49 | 1.08E-32 | 3.92E-14 | 3.65E-14 | 7.25E-14 | 5.96E-01 | 3.66E-01 | 2.39E-02 |
| 126.07439 | 170.31 | 18.40 | 14.51 | 14.26 | 15.86 | 4.48E-57 | 3.65E-14 | 3.65E-14 | 3.85E-14 | 6.56E-01 | 1.10E-08 | 1.23E-11 |
| 126.09134 | 290.8  | 17.10 | 15.73 | 15.92 | 15.70 | 3.77E-17 | 1.68E-13 | 6.31E-11 | 1.80E-13 | 6.87E-01 | 9.98E-01 | 5.89E-01 |
| 126.09948 | 198.09 | 15.25 | 10.80 | 11.90 | 12.68 | 4.40E-13 | 4.07E-13 | 2.64E-08 | 6.15E-05 | 2.16E-01 | 8.06E-03 | 5.28E-01 |
| 126.1026  | 53.7   | 21.46 | 21.51 | 21.35 | 21.40 | 8.30E-01 | 9.89E-01 | 9.27E-01 | 9.92E-01 | 8.03E-01 | 9.40E-01 | 9.90E-01 |
| 126.12775 | 23.36  | 15.47 | 12.42 | 12.34 | 13.11 | 3.43E-24 | 7.37E-14 | 6.85E-14 | 2.16E-12 | 9.92E-01 | 1.34E-01 | 6.79E-02 |
| 126.50091 | 250.92 | 15.95 | 15.23 | 15.25 | 15.42 | 7.94E-03 | 1.44E-02 | 1.60E-02 | 1.30E-01 | 1.00E+00 | 8.79E-01 | 9.01E-01 |
| 126.50092 | 134.69 | 17.56 | 16.75 | 17.40 | 16.62 | 6.35E-07 | 1.47E-04 | 8.13E-01 | 1.43E-05 | 5.25E-03 | 9.23E-01 | 7.34E-04 |
| 126.50959 | 115.62 | 14.24 | 14.58 | 14.79 | 14.31 | 6.19E-01 | 8.79E-01 | 6.19E-01 | 9.99E-01 | 9.70E-01 | 9.41E-01 | 7.44E-01 |
| 126.52709 | 95.77  | 15.93 | 14.48 | 14.26 | 14.67 | 3.26E-04 | 3.38E-03 | 4.44E-04 | 1.91E-02 | 9.59E-01 | 9.72E-01 | 7.88E-01 |
| 126.54583 | 88.91  | 17.75 | 19.61 | 19.51 | 18.78 | 3.36E-09 | 3.68E-08 | 1.44E-07 | 6.82E-03 | 9.90E-01 | 5.59E-02 | 1.09E-01 |
| 126.54916 | 83.73  | 15.55 | 16.37 | 16.27 | 15.71 | 1.08E-02 | 2.36E-02 | 5.76E-02 | 9.47E-01 | 9.86E-01 | 1.34E-01 | 2.52E-01 |
| 126.59463 | 93.32  | 16.29 | 17.37 | 17.58 | 17.31 | 3.17E-08 | 1.20E-05 | 8.51E-08 | 6.21E-05 | 7.88E-01 | 9.95E-01 | 6.59E-01 |
| 126.92081 | 44.74  | 16.06 | 13.92 | 14.21 | 14.60 | 9.94E-20 | 7.46E-14 | 9.02E-14 | 2.60E-09 | 5.55E-01 | 2.03E-02 | 3.48E-01 |
| 126.95542 | 287.19 | 19.32 | 14.92 | 14.87 | 16.71 | 7.95E-37 | 3.65E-14 | 3.65E-14 | 4.79E-13 | 9.99E-01 | 1.56E-06 | 6.18E-07 |
| 126.96301 | 111.99 | 10.08 | 13.76 | 13.71 | 13.30 | 3.50E-25 | 6.83E-14 | 7.05E-14 | 7.55E-14 | 9.99E-01 | 5.98E-01 | 6.84E-01 |
| 126.96753 | 134.4  | 17.13 | 11.77 | 10.88 | 13.88 | 3.72E-45 | 3.65E-14 | 3.65E-14 | 7.67E-14 | 8.04E-02 | 5.84E-07 | 8.61E-13 |
| 126.97197 | 297.38 | 19.85 | 16.34 | 15.72 | 16.93 | 2.44E-33 | 4.19E-14 | 3.65E-14 | 7.22E-14 | 1.89E-01 | 2.46E-01 | 9.25E-04 |
| 126.98331 | 265.14 | 16.51 | 10.96 | 11.20 | 12.04 | 1.36E-28 | 4.16E-14 | 4.92E-14 | 7.45E-14 | 9.61E-01 | 1.36E-01 | 3.24E-01 |
| 126.98963 | 270.92 | 20.11 | 17.23 | 17.56 | 18.00 | 4.24E-32 | 3.65E-14 | 4.10E-14 | 7.34E-14 | 4.59E-01 | 5.89E-03 | 2.27E-01 |
| 127.01549 | 121    | 16.76 | 14.82 | 13.22 | 14.52 | 1.16E-07 | 5.52E-03 | 2.05E-08 | 1.24E-03 | 3.70E-02 | 9.60E-01 | 1.45E-01 |
| 127.02043 | 77.53  | 19.85 | 20.25 | 20.14 | 20.20 | 1.25E-01 | 1.24E-01 | 3.68E-01 | 2.47E-01 | 9.36E-01 | 9.92E-01 | 9.91E-01 |
| 127.02605 | 78.56  | 21.25 | 21.71 | 21.63 | 21.60 | 5.70E-02 | 5.50E-02 | 1.49E-01 | 2.45E-01 | 9.72E-01 | 9.32E-01 | 9.98E-01 |
| 127.03255 | 153.58 | 13.96 | 16.05 | 14.33 | 16.21 | 2.78E-07 | 4.76E-05 | 8.40E-01 | 1.68E-05 | 1.79E-03 | 9.86E-01 | 6.95E-04 |
| 127.03894 | 283.21 | 23.15 | 23.97 | 23.87 | 24.08 | 1.31E-02 | 4.23E-02 | 8.56E-02 | 1.91E-02 | 9.91E-01 | 9.86E-01 | 9.21E-01 |
| 127.05021 | 287.9  | 17.18 | 16.23 | 16.21 | 16.26 | 1.50E-07 | 7.10E-06 | 3.78E-06 | 2.23E-05 | 1.00E+00 | 9.99E-01 | 9.97E-01 |
| 127.05832 | 238.39 | 18.43 | 15.62 | 15.69 | 16.07 | 2.89E-43 | 3.65E-14 | 3.65E-14 | 3.67E-14 | 9.83E-01 | 8.91E-02 | 1.86E-01 |
| 127.07273 | 141.42 | 17.80 | 16.21 | 14.51 | 16.97 | 7.04E-14 | 3.77E-04 | 9.54E-14 | 1.68E-01 | 2.03E-04 | 2.55E-01 | 5.25E-08 |
| 127.07274 | 20.57  | 16.31 | 14.92 | 13.83 | 15.00 | 2.99E-29 | 3.67E-12 | 3.65E-14 | 1.20E-10 | 7.62E-08 | 9.82E-01 | 2.21E-08 |
| 127.07535 | 289.44 | 17.70 | 16.40 | 16.33 | 16.50 | 3.46E-14 | 7.87E-11 | 5.52E-12 | 5.17E-09 | 9.84E-01 | 9.51E-01 | 8.10E-01 |
| 127.07538 | 156.02 | 18.22 | 16.94 | 17.10 | 17.42 | 2.22E-12 | 1.44E-11 | 2.44E-09 | 5.59E-05 | 7.94E-01 | 4.62E-02 | 3.04E-01 |
| 127.08664 | 162.62 | 17.06 | 15.08 | 15.95 | 15.63 | 6.14E-21 | 6.36E-14 | 2.92E-08 | 5.29E-12 | 3.48E-05 | 2.59E-02 | 3.40E-01 |
| 127.10598 | 57.2   | 17.48 | 16.48 | 16.49 | 16.67 | 5.73E-06 | 4.54E-05 | 4.13E-05 | 1.85E-03 | 1.00E+00 | 8.59E-01 | 8.65E-01 |

|           |        |       |       |       |       |          |          |          |          |          |          |          |
|-----------|--------|-------|-------|-------|-------|----------|----------|----------|----------|----------|----------|----------|
| 127.11175 | 285.93 | 16.86 | 15.36 | 15.10 | 15.62 | 4.13E-19 | 2.08E-13 | 7.41E-14 | 1.81E-09 | 5.14E-01 | 5.44E-01 | 3.85E-02 |
| 127.11177 | 20.66  | 16.74 | 12.96 | 13.52 | 14.14 | 1.26E-57 | 3.65E-14 | 3.65E-14 | 3.65E-14 | 1.34E-02 | 1.16E-08 | 5.46E-03 |
| 127.11182 | 152.34 | 17.54 | 15.17 | 15.81 | 16.26 | 5.24E-24 | 4.23E-14 | 8.19E-14 | 2.27E-08 | 1.22E-02 | 4.50E-06 | 1.48E-01 |
| 127.12296 | 19.84  | 15.99 | 12.74 | 12.32 | 13.01 | 1.60E-26 | 7.32E-14 | 4.43E-14 | 7.52E-14 | 5.66E-01 | 8.66E-01 | 1.75E-01 |
| 127.50873 | 96.94  | 17.87 | 14.67 | 14.27 | 15.33 | 2.34E-29 | 5.76E-14 | 3.70E-14 | 8.80E-14 | 5.13E-01 | 1.39E-01 | 2.91E-03 |
| 127.52435 | 31.9   | 15.57 | 10.42 | 11.01 | 11.65 | 1.64E-75 | 3.65E-14 | 3.65E-14 | 3.65E-14 | 1.67E-02 | 3.64E-08 | 8.70E-03 |
| 127.96656 | 29.84  | 19.77 | 12.13 | 13.05 | 14.70 | 1.12E-93 | 3.65E-14 | 3.65E-14 | 3.65E-14 | 4.61E-04 | 6.18E-14 | 1.31E-10 |
| 127.97475 | 86.81  | 13.72 | 15.89 | 16.09 | 16.08 | 2.76E-13 | 3.91E-09 | 8.31E-11 | 4.49E-10 | 9.35E-01 | 9.51E-01 | 1.00E+00 |
| 127.97941 | 21.46  | 16.07 | 7.95  | 8.35  | 9.54  | 7.54E-88 | 3.65E-14 | 3.65E-14 | 3.65E-14 | 4.59E-01 | 3.69E-07 | 2.07E-04 |
| 127.98234 | 127.8  | 17.41 | 12.94 | 14.34 | 13.99 | 3.04E-43 | 3.65E-14 | 3.87E-14 | 3.65E-14 | 2.03E-06 | 9.93E-04 | 5.77E-01 |
| 127.99051 | 265.73 | 16.84 | 11.87 | 11.42 | 13.18 | 2.59E-28 | 5.81E-14 | 3.81E-14 | 7.65E-13 | 7.63E-01 | 3.16E-02 | 1.36E-03 |
| 128.01833 | 80.53  | 22.78 | 22.91 | 23.18 | 23.33 | 5.84E-03 | 8.69E-01 | 7.24E-02 | 7.21E-03 | 3.74E-01 | 7.49E-02 | 8.18E-01 |
| 128.02308 | 94.1   | 20.41 | 18.49 | 19.03 | 18.47 | 1.61E-27 | 4.79E-14 | 1.37E-13 | 5.23E-14 | 1.10E-02 | 9.99E-01 | 9.78E-03 |
| 128.02623 | 78.72  | 19.49 | 19.43 | 19.46 | 19.38 | 9.28E-01 | 9.81E-01 | 9.98E-01 | 9.15E-01 | 9.97E-01 | 9.93E-01 | 9.63E-01 |
| 128.02866 | 82.95  | 15.70 | 15.70 | 15.41 | 15.87 | 2.37E-01 | 1.00E+00 | 5.26E-01 | 8.66E-01 | 5.58E-01 | 8.74E-01 | 1.77E-01 |
| 128.03515 | 224.73 | 13.77 | 11.30 | 11.62 | 10.93 | 1.70E-03 | 9.83E-03 | 3.05E-02 | 2.78E-03 | 9.79E-01 | 9.70E-01 | 8.36E-01 |
| 128.04231 | 278.32 | 19.49 | 19.66 | 19.51 | 19.64 | 8.81E-01 | 9.06E-01 | 1.00E+00 | 9.41E-01 | 9.41E-01 | 1.00E+00 | 9.65E-01 |
| 128.04549 | 220.87 | 16.71 | 15.24 | 14.93 | 15.11 | 3.90E-23 | 8.12E-14 | 6.89E-14 | 7.43E-14 | 2.98E-01 | 8.88E-01 | 7.60E-01 |
| 128.04553 | 34.15  | 17.52 | 14.62 | 15.07 | 15.80 | 5.62E-26 | 4.12E-14 | 7.44E-14 | 5.01E-10 | 2.69E-01 | 5.57E-05 | 2.81E-02 |
| 128.04972 | 70.33  | 16.33 | 17.10 | 16.97 | 16.78 | 4.24E-04 | 3.99E-04 | 4.28E-03 | 1.03E-01 | 9.11E-01 | 3.76E-01 | 7.64E-01 |
| 128.06203 | 286.6  | 18.07 | 16.36 | 16.61 | 16.63 | 7.72E-14 | 2.44E-12 | 1.15E-09 | 7.97E-09 | 7.03E-01 | 6.56E-01 | 9.99E-01 |
| 128.07057 | 279.19 | 20.99 | 20.09 | 21.01 | 19.85 | 6.89E-05 | 1.34E-02 | 1.00E+00 | 1.16E-03 | 1.40E-02 | 8.65E-01 | 1.29E-03 |
| 128.07625 | 67.47  | 16.22 | 15.13 | 15.17 | 15.72 | 1.92E-02 | 3.08E-02 | 3.82E-02 | 5.98E-01 | 1.00E+00 | 4.96E-01 | 5.51E-01 |
| 128.08013 | 286.93 | 16.42 | 14.94 | 15.43 | 14.51 | 2.30E-12 | 3.29E-08 | 3.01E-04 | 3.78E-12 | 2.17E-01 | 3.36E-01 | 2.35E-03 |
| 128.10699 | 275.08 | 19.16 | 17.47 | 16.64 | 17.55 | 1.72E-11 | 4.70E-06 | 4.59E-12 | 2.78E-05 | 7.94E-02 | 9.94E-01 | 4.89E-02 |
| 128.14344 | 20.1   | 13.32 | 12.44 | 12.18 | 12.88 | 3.68E-03 | 3.84E-02 | 2.97E-03 | 5.63E-01 | 8.66E-01 | 5.77E-01 | 1.75E-01 |
| 128.50265 | 27.43  | 14.38 | 14.87 | 16.79 | 15.88 | 9.03E-15 | 3.25E-01 | 1.04E-13 | 4.98E-06 | 3.55E-09 | 6.00E-03 | 1.66E-02 |
| 128.51029 | 56.46  | 19.52 | 19.92 | 21.43 | 19.64 | 1.51E-31 | 3.39E-02 | 3.65E-14 | 8.60E-01 | 7.34E-14 | 2.67E-01 | 4.23E-14 |
| 128.5206  | 48.25  | 16.08 | 14.63 | 16.54 | 15.80 | 1.61E-13 | 5.37E-09 | 1.62E-01 | 6.20E-01 | 1.55E-13 | 1.24E-05 | 1.01E-02 |
| 128.52475 | 84.72  | 16.89 | 15.78 | 15.66 | 15.98 | 1.82E-06 | 4.97E-05 | 5.09E-06 | 1.95E-03 | 9.70E-01 | 8.62E-01 | 6.11E-01 |
| 128.95075 | 275.31 | 24.25 | 20.72 | 20.49 | 22.16 | 4.95E-28 | 5.63E-14 | 3.92E-14 | 4.74E-09 | 8.89E-01 | 1.68E-04 | 6.64E-06 |
| 128.95085 | 54.95  | 23.98 | 19.50 | 19.70 | 21.76 | 1.72E-75 | 3.65E-14 | 3.65E-14 | 3.70E-14 | 6.85E-01 | 3.72E-14 | 4.79E-14 |
| 128.99814 | 61.03  | 18.22 | 15.54 | 16.15 | 16.30 | 4.68E-10 | 6.35E-10 | 1.80E-06 | 2.40E-05 | 4.32E-01 | 2.64E-01 | 9.83E-01 |
| 129.00904 | 71.81  | 15.61 | 13.60 | 15.97 | 14.25 | 4.05E-08 | 1.50E-05 | 8.09E-01 | 9.03E-03 | 4.21E-07 | 4.52E-01 | 6.03E-04 |
| 129.01181 | 36.32  | 15.71 | 15.66 | 17.51 | 15.61 | 2.74E-12 | 9.98E-01 | 1.34E-09 | 9.80E-01 | 1.60E-09 | 9.97E-01 | 1.32E-09 |
| 129.01883 | 267.26 | 16.41 | 14.84 | 14.91 | 15.36 | 3.48E-24 | 6.65E-14 | 7.21E-14 | 2.59E-10 | 9.74E-01 | 5.02E-03 | 1.71E-02 |
| 129.02829 | 58.99  | 15.23 | 14.06 | 14.41 | 14.57 | 1.19E-03 | 5.52E-04 | 2.76E-02 | 1.33E-01 | 6.51E-01 | 3.58E-01 | 9.54E-01 |
| 129.04325 | 288.66 | 15.75 | 14.37 | 14.64 | 15.04 | 1.50E-04 | 1.27E-04 | 2.75E-03 | 1.32E-01 | 8.47E-01 | 1.97E-01 | 6.23E-01 |
| 129.0434  | 196.8  | 16.45 | 13.73 | 14.04 | 14.20 | 1.63E-40 | 3.65E-14 | 3.65E-14 | 3.72E-14 | 3.12E-01 | 5.91E-02 | 8.25E-01 |
| 129.05462 | 287.84 | 19.07 | 18.42 | 18.41 | 18.00 | 1.33E-02 | 1.78E-01 | 1.56E-01 | 6.96E-03 | 1.00E+00 | 6.03E-01 | 6.23E-01 |
| 129.06604 | 264.55 | 18.63 | 17.75 | 17.13 | 17.83 | 7.92E-16 | 7.47E-07 | 7.38E-14 | 1.49E-05 | 1.35E-03 | 9.64E-01 | 3.05E-04 |
| 129.06983 | 24.18  | 17.08 | 14.54 | 15.27 | 16.34 | 3.23E-39 | 3.65E-14 | 4.76E-14 | 5.32E-05 | 8.22E-05 | 6.85E-14 | 8.42E-09 |
| 129.06988 | 284.07 | 17.14 | 15.67 | 15.90 | 15.79 | 3.35E-16 | 1.28E-13 | 1.33E-10 | 1.33E-11 | 5.56E-01 | 9.13E-01 | 9.26E-01 |
| 129.07447 | 169.28 | 16.94 | 14.44 | 14.40 | 15.02 | 2.72E-36 | 3.65E-14 | 3.65E-14 | 7.24E-14 | 9.96E-01 | 1.65E-02 | 7.96E-03 |
| 129.09163 | 178.87 | 17.06 | 14.26 | 14.05 | 15.27 | 2.93E-33 | 3.72E-14 | 3.65E-14 | 2.10E-12 | 7.81E-01 | 1.91E-04 | 2.73E-06 |
| 129.10228 | 213.17 | 17.15 | 15.35 | 16.16 | 15.87 | 2.40E-21 | 6.05E-14 | 3.56E-08 | 4.56E-12 | 1.51E-05 | 1.81E-02 | 3.09E-01 |
| 129.10235 | 70.25  | 19.18 | 19.80 | 19.95 | 19.86 | 1.48E-05 | 1.50E-03 | 3.30E-05 | 5.37E-04 | 8.14E-01 | 9.84E-01 | 9.59E-01 |
| 129.1386  | 273.34 | 18.66 | 20.74 | 19.98 | 20.01 | 1.97E-12 | 5.41E-13 | 3.91E-06 | 5.54E-06 | 2.52E-02 | 4.30E-02 | 1.00E+00 |
| 129.13873 | 83.57  | 16.67 | 21.03 | 18.50 | 20.55 | 2.17E-17 | 7.61E-14 | 1.19E-03 | 2.36E-12 | 5.12E-06 | 7.85E-01 | 5.07E-04 |
| 129.50667 | 82.34  | 17.27 | 13.28 | 13.17 | 15.92 | 1.16E-29 | 5.07E-14 | 4.19E-14 | 1.39E-03 | 9.90E-01 | 1.24E-10 | 1.45E-11 |
| 129.52434 | 260.11 | 18.25 | 18.37 | 19.05 | 17.51 | 2.04E-10 | 9.22E-01 | 3.84E-04 | 1.89E-03 | 5.84E-03 | 3.01E-04 | 1.71E-11 |
| 129.53612 | 30.21  | 15.60 | 17.44 | 18.56 | 17.91 | 2.89E-30 | 1.36E-13 | 3.65E-14 | 7.25E-14 | 9.82E-06 | 1.93E-01 | 2.89E-02 |
| 129.57623 | 74.14  | 15.56 | 15.95 | 16.08 | 16.43 | 1.69E-02 | 4.58E-01 | 1.90E-01 | 8.17E-03 | 9.58E-01 | 3.12E-01 | 5.96E-01 |
| 129.58175 | 86.58  | 16.25 | 15.60 | 16.31 | 16.35 | 6.27E-03 | 2.89E-02 | 9.92E-01 | 9.75E-01 | 1.57E-02 | 1.39E-02 | 9.99E-01 |
| 129.59438 | 61.76  | 17.32 | 18.04 | 18.40 | 17.66 | 3.58E-17 | 1.45E-08 | 7.45E-14 | 2.13E-02 | 1.35E-02 | 1.29E-02 | 3.27E-08 |
| 129.93454 | 106.26 | 17.65 | 12.48 | 12.20 | 14.86 | 5.67E-44 | 3.65E-14 | 3.65E-14 | 3.22E-13 | 8.51E-01 | 1.06E-09 | 7.38E-12 |
| 129.95131 | 32.11  | 19.47 | 11.70 | 12.31 | 14.42 | 2.18E-86 | 3.65E-14 | 3.65E-14 | 3.65E-14 | 9.70E-02 | 7.43E-14 | 6.66E-13 |
| 129.9542  | 135.93 | 17.31 | 8.90  | 8.80  | 12.91 | 6.24E-54 | 3.65E-14 | 3.65E-14 | 7.43E-14 | 9.97E-01 | 1.23E-13 | 8.12E-14 |
| 129.9542  | 19.58  | 19.53 | 11.13 | 11.43 | 14.05 | 2.24E-80 | 3.65E-14 | 3.65E-14 | 3.65E-14 | 7.62E-01 | 7.52E-14 | 1.67E-13 |
| 129.95863 | 19.45  | 17.99 | 11.11 | 11.66 | 12.79 | 9.82E-86 | 3.65E-14 | 3.65E-14 | 3.65E-14 | 8.81E-02 | 2.13E-10 | 2.37E-05 |
| 129.97914 | 273.89 | 20.13 | 16.76 | 17.06 | 17.67 | 4.74E-41 | 3.65E-14 | 3.65E-14 | 5.67E-14 | 5.25E-01 | 4.58E-04 | 3.45E-02 |
| 129.97917 | 127.38 | 19.70 | 15.95 | 16.63 | 16.82 | 6.75E-62 | 3.65E-14 | 3.65E-14 | 3.65E-14 | 5.21E-04 | 8.69E-06 | 6.89E-01 |
| 130.00793 | 300.3  | 16.33 | 15.26 | 14.27 | 15.72 | 2.06E-13 | 1.34E-04 | 1.15E-13 | 8.18E-02 | 8.15E-04 | 2.91E-01 | 4.62E-07 |
| 130.01693 | 90.76  | 17.82 | 18.44 | 19.03 | 18.86 | 4.62E-09 | 9.35E-03 | 8.82E-09 | 2.33E-06 | 1.53E-02 | 1.64E-01 | 8.33E-01 |
| 130.03197 | 62.64  | 16.37 | 15.79 | 15.98 | 16.22 | 1.65E-02 | 1.40E-02 | 1.59E-01 | 8.75E-01 | 7.80E-01 | 1.43E-01 | 6.05E-01 |
| 130.04995 | 178.19 | 23.85 | 24.66 | 22.52 | 25.09 | 3.01E-18 | 1.16E-02 | 2.60E-06 | 3.74E-05 | 3.53E-13 | 4.06E-01 | 7.48E-14 |
| 130.04995 | 69.75  | 28.73 | 28.60 | 28.43 | 28.51 | 4.37E-04 | 2.87E-01 | 2.62E-04 | 1.48E-02 | 1.03E-01 | 5.94E-01 | 7.65E-01 |
| 130.05941 | 285.19 | 19.80 | 19.12 | 19.22 | 18.68 | 6.39E-03 | 1.23E-01 | 2.29E-01 | 2.73E-03 | 9.89E-01 | 5.37E-01 | 3.46E-01 |

|           |        |       |       |       |       |          |          |          |          |          |          |          |
|-----------|--------|-------|-------|-------|-------|----------|----------|----------|----------|----------|----------|----------|
| 130.06512 | 288.56 | 17.61 | 16.41 | 16.34 | 16.36 | 5.03E-18 | 7.18E-13 | 9.29E-14 | 3.30E-13 | 9.63E-01 | 9.86E-01 | 9.99E-01 |
| 130.08614 | 66.18  | 23.82 | 24.29 | 24.37 | 24.17 | 2.52E-03 | 1.42E-02 | 2.38E-03 | 1.35E-01 | 9.60E-01 | 8.70E-01 | 5.92E-01 |
| 130.09926 | 78.53  | 19.45 | 20.95 | 21.11 | 20.14 | 6.83E-15 | 5.13E-11 | 3.62E-13 | 8.09E-03 | 8.76E-01 | 1.56E-03 | 7.66E-05 |
| 130.10545 | 78.96  | 16.19 | 15.08 | 15.62 | 14.76 | 9.79E-06 | 7.45E-04 | 1.86E-01 | 1.17E-05 | 2.50E-01 | 7.15E-01 | 2.27E-02 |
| 130.12268 | 149.61 | 17.08 | 15.42 | 15.76 | 16.06 | 7.78E-22 | 6.49E-14 | 8.12E-14 | 4.53E-09 | 1.35E-01 | 6.63E-04 | 2.56E-01 |
| 130.14203 | 35.03  | 15.19 | 14.47 | 12.66 | 15.98 | 5.43E-17 | 1.56E-01 | 9.42E-12 | 1.12E-01 | 2.72E-06 | 2.54E-04 | 7.47E-14 |
| 130.15899 | 23.38  | 18.41 | 18.57 | 18.24 | 18.46 | 5.93E-01 | 9.04E-01 | 8.86E-01 | 9.97E-01 | 5.21E-01 | 9.71E-01 | 8.12E-01 |
| 130.15908 | 165.36 | 18.23 | 17.37 | 17.74 | 17.77 | 3.47E-07 | 5.20E-08 | 3.84E-03 | 1.04E-02 | 6.05E-02 | 4.73E-02 | 9.98E-01 |
| 130.48222 | 89.18  | 15.44 | 17.33 | 17.98 | 16.90 | 9.28E-17 | 3.24E-10 | 7.42E-14 | 2.75E-06 | 9.59E-02 | 4.51E-01 | 1.24E-03 |
| 130.50321 | 63.29  | 17.44 | 11.49 | 12.34 | 15.60 | 4.13E-32 | 3.65E-14 | 5.32E-14 | 7.20E-04 | 2.76E-01 | 9.90E-14 | 6.83E-10 |
| 130.50672 | 55.96  | 15.48 | 13.02 | 15.25 | 13.14 | 2.18E-09 | 9.47E-07 | 9.57E-01 | 6.13E-06 | 1.75E-05 | 9.95E-01 | 8.51E-05 |
| 130.52577 | 95.72  | 23.51 | 20.63 | 21.68 | 21.21 | 7.24E-26 | 3.87E-14 | 3.07E-12 | 7.46E-14 | 1.56E-04 | 1.09E-01 | 2.31E-01 |
| 130.5314  | 98.83  | 16.49 | 13.90 | 14.62 | 14.66 | 4.13E-12 | 3.58E-12 | 4.48E-07 | 1.98E-06 | 1.58E-01 | 1.47E-01 | 1.00E+00 |
| 130.53864 | 194.3  | 14.82 | 15.30 | 15.81 | 16.16 | 2.13E-03 | 5.46E-01 | 3.03E-02 | 1.82E-03 | 5.09E-01 | 1.04E-01 | 7.76E-01 |
| 130.54092 | 81.83  | 15.65 | 15.26 | 15.69 | 15.50 | 1.97E-01 | 2.62E-01 | 9.97E-01 | 9.06E-01 | 1.97E-01 | 7.05E-01 | 8.30E-01 |
| 130.93292 | 27.33  | 18.28 | 18.67 | 19.60 | 18.80 | 1.43E-13 | 6.36E-02 | 9.66E-14 | 8.79E-03 | 1.69E-07 | 8.82E-01 | 1.24E-05 |
| 130.9492  | 21.52  | 16.52 | 10.18 | 10.80 | 11.70 | 6.00E-84 | 3.65E-14 | 3.65E-14 | 3.65E-14 | 2.82E-02 | 9.93E-10 | 4.44E-04 |
| 130.95821 | 276.13 | 19.11 | 16.99 | 17.29 | 16.96 | 1.07E-20 | 7.48E-14 | 3.72E-13 | 7.27E-14 | 5.86E-01 | 9.99E-01 | 5.12E-01 |
| 130.96639 | 285.88 | 22.51 | 18.11 | 17.63 | 19.90 | 1.87E-46 | 3.65E-14 | 3.65E-14 | 7.36E-14 | 3.56E-01 | 4.29E-08 | 3.22E-12 |
| 130.97743 | 48.13  | 17.54 | 17.14 | 17.27 | 16.90 | 3.81E-09 | 1.38E-04 | 2.03E-02 | 9.32E-10 | 5.02E-01 | 7.44E-02 | 1.01E-03 |
| 130.98902 | 265.98 | 18.96 | 15.78 | 15.79 | 16.80 | 7.83E-26 | 6.05E-14 | 5.87E-14 | 4.02E-11 | 1.00E+00 | 6.28E-03 | 6.23E-03 |
| 130.98904 | 160.72 | 18.11 | 14.92 | 15.30 | 15.90 | 2.57E-42 | 3.65E-14 | 3.65E-14 | 5.76E-14 | 2.24E-01 | 2.64E-05 | 2.28E-02 |
| 130.9971  | 106.16 | 15.50 | 14.56 | 13.70 | 14.47 | 7.08E-05 | 6.48E-02 | 1.54E-05 | 3.98E-02 | 1.16E-01 | 9.95E-01 | 2.15E-01 |
| 130.99919 | 194.01 | 15.91 | 9.73  | 12.03 | 10.67 | 4.45E-30 | 3.65E-14 | 1.44E-13 | 6.36E-14 | 2.37E-05 | 2.44E-01 | 3.45E-02 |
| 131.00163 | 42.34  | 18.99 | 19.25 | 18.75 | 19.51 | 4.36E-03 | 5.84E-01 | 6.33E-01 | 7.35E-02 | 8.20E-02 | 6.51E-01 | 3.09E-03 |
| 131.00171 | 112.7  | 19.33 | 14.01 | 15.56 | 15.36 | 9.42E-64 | 3.65E-14 | 3.65E-14 | 3.65E-14 | 5.34E-10 | 1.82E-07 | 8.28E-01 |
| 131.01624 | 43.8   | 15.45 | 16.44 | 16.05 | 16.71 | 1.35E-04 | 3.15E-03 | 1.44E-01 | 1.21E-04 | 5.34E-01 | 7.97E-01 | 1.17E-01 |
| 131.02273 | 29.54  | 13.69 | 16.64 | 16.41 | 16.17 | 8.72E-30 | 3.79E-14 | 5.05E-14 | 7.23E-14 | 7.79E-01 | 2.55E-01 | 7.85E-01 |
| 131.02748 | 91.83  | 20.01 | 18.05 | 18.25 | 18.10 | 1.83E-32 | 3.70E-14 | 4.96E-14 | 4.01E-14 | 5.88E-01 | 9.89E-01 | 8.00E-01 |
| 131.03385 | 74.14  | 20.77 | 20.75 | 20.97 | 20.50 | 4.00E-03 | 9.96E-01 | 3.53E-01 | 1.16E-01 | 2.66E-01 | 2.10E-01 | 1.31E-03 |
| 131.04314 | 178.7  | 16.55 | 13.99 | 14.06 | 14.63 | 1.19E-28 | 4.16E-14 | 4.45E-14 | 8.27E-14 | 9.89E-01 | 2.89E-02 | 6.11E-02 |
| 131.04809 | 63.25  | 21.73 | 21.29 | 21.59 | 21.34 | 3.38E-09 | 4.06E-08 | 2.44E-01 | 3.27E-06 | 3.66E-04 | 8.99E-01 | 6.60E-03 |
| 131.05332 | 155.19 | 19.13 | 19.81 | 17.63 | 20.86 | 2.64E-14 | 2.38E-01 | 1.80E-04 | 2.45E-05 | 6.12E-08 | 2.84E-02 | 8.07E-14 |
| 131.05612 | 67.08  | 18.19 | 16.74 | 17.22 | 16.58 | 8.15E-08 | 3.02E-06 | 3.18E-03 | 4.15E-07 | 3.40E-01 | 9.54E-01 | 1.39E-01 |
| 131.06374 | 28.41  | 17.09 | 15.92 | 11.44 | 17.41 | 4.62E-49 | 2.22E-03 | 3.65E-14 | 7.80E-01 | 3.65E-14 | 1.40E-04 | 3.65E-14 |
| 131.07173 | 284.67 | 17.60 | 16.30 | 16.47 | 15.73 | 7.72E-13 | 2.28E-07 | 6.09E-06 | 4.91E-13 | 8.96E-01 | 8.55E-02 | 1.25E-02 |
| 131.07224 | 24.27  | 16.68 | 12.86 | 13.82 | 13.66 | 2.35E-61 | 3.65E-14 | 3.65E-14 | 3.65E-14 | 3.80E-07 | 7.18E-05 | 7.79E-01 |
| 131.08331 | 79.59  | 23.83 | 25.22 | 25.12 | 24.73 | 1.87E-17 | 7.43E-14 | 1.42E-13 | 4.49E-07 | 9.20E-01 | 1.68E-02 | 8.31E-02 |
| 131.08545 | 23.8   | 17.65 | 12.32 | 12.84 | 13.93 | 6.22E-66 | 3.65E-14 | 3.65E-14 | 3.65E-14 | 1.20E-01 | 1.19E-09 | 5.03E-05 |
| 131.08557 | 173.69 | 17.86 | 12.52 | 13.02 | 13.77 | 4.60E-77 | 3.65E-14 | 3.65E-14 | 3.65E-14 | 6.26E-02 | 5.24E-08 | 2.25E-03 |
| 131.08964 | 74.84  | 19.51 | 20.03 | 20.27 | 20.03 | 1.87E-05 | 5.46E-03 | 7.63E-06 | 6.44E-03 | 4.05E-01 | 1.00E+00 | 4.48E-01 |
| 131.09016 | 222.39 | 16.99 | 14.80 | 15.48 | 15.44 | 4.34E-11 | 2.63E-11 | 4.36E-06 | 5.38E-06 | 1.21E-01 | 1.84E-01 | 9.99E-01 |
| 131.10259 | 76.09  | 15.84 | 15.91 | 16.01 | 15.72 | 3.51E-01 | 9.71E-01 | 6.82E-01 | 8.76E-01 | 9.17E-01 | 6.62E-01 | 2.84E-01 |
| 131.11788 | 287.56 | 19.05 | 17.83 | 17.59 | 17.77 | 9.91E-07 | 1.62E-04 | 3.41E-06 | 1.16E-04 | 8.53E-01 | 9.98E-01 | 9.33E-01 |
| 131.16238 | 23.59  | 14.74 | 13.08 | 13.09 | 13.75 | 2.15E-03 | 4.82E-03 | 4.68E-03 | 2.07E-01 | 1.00E+00 | 5.72E-01 | 5.79E-01 |
| 131.47661 | 105.06 | 17.11 | 19.66 | 19.05 | 18.28 | 1.07E-16 | 7.49E-14 | 1.36E-10 | 3.32E-04 | 1.37E-01 | 2.59E-05 | 4.37E-02 |
| 131.49005 | 93.88  | 15.01 | 15.01 | 15.75 | 14.58 | 1.86E-05 | 1.00E+00 | 4.68E-03 | 2.41E-01 | 6.85E-03 | 2.65E-01 | 6.15E-06 |
| 131.50085 | 78.05  | 21.47 | 17.51 | 17.64 | 19.42 | 2.73E-57 | 3.65E-14 | 3.65E-14 | 7.29E-14 | 9.26E-01 | 7.43E-14 | 8.92E-14 |
| 131.5169  | 121.6  | 20.11 | 18.28 | 19.09 | 18.55 | 3.83E-22 | 6.63E-14 | 4.67E-08 | 7.47E-14 | 3.56E-05 | 4.28E-01 | 1.62E-02 |
| 131.52083 | 104.63 | 17.38 | 12.61 | 14.26 | 13.25 | 1.82E-25 | 4.41E-14 | 3.88E-12 | 7.59E-14 | 6.40E-04 | 4.45E-01 | 9.31E-02 |
| 131.52381 | 89.25  | 16.78 | 12.27 | 13.24 | 13.22 | 6.28E-16 | 8.07E-14 | 3.67E-10 | 1.24E-09 | 2.66E-01 | 3.07E-01 | 1.00E+00 |
| 131.52796 | 90.2   | 17.20 | 14.35 | 14.81 | 15.16 | 2.85E-19 | 7.33E-14 | 1.73E-13 | 7.22E-10 | 4.31E-01 | 4.75E-02 | 6.56E-01 |
| 131.53361 | 267.16 | 16.54 | 12.28 | 13.06 | 12.83 | 2.41E-22 | 7.12E-14 | 8.94E-14 | 7.63E-14 | 2.53E-01 | 5.78E-01 | 9.56E-01 |
| 131.54228 | 87.79  | 20.88 | 23.42 | 23.72 | 23.06 | 7.77E-32 | 4.32E-14 | 3.65E-14 | 7.27E-14 | 5.39E-01 | 3.82E-01 | 2.02E-02 |
| 131.57357 | 90.24  | 15.77 | 16.71 | 16.95 | 16.64 | 1.75E-04 | 4.66E-03 | 1.56E-04 | 1.32E-02 | 8.33E-01 | 9.96E-01 | 7.16E-01 |
| 131.9298  | 266.64 | 21.40 | 16.14 | 15.62 | 17.75 | 8.96E-62 | 3.65E-14 | 3.65E-14 | 3.65E-14 | 2.27E-01 | 1.17E-07 | 2.18E-12 |
| 131.96178 | 257.91 | 16.63 | 15.06 | 14.95 | 15.17 | 8.75E-24 | 7.32E-14 | 7.16E-14 | 7.61E-14 | 9.20E-01 | 9.13E-01 | 5.74E-01 |
| 131.97424 | 287.37 | 20.49 | 17.81 | 17.29 | 18.30 | 1.55E-24 | 7.33E-14 | 4.81E-14 | 7.94E-12 | 2.82E-01 | 3.50E-01 | 4.22E-03 |
| 131.99619 | 86.03  | 17.36 | 17.37 | 14.80 | 14.86 | 3.13E-14 | 1.00E+00 | 2.51E-09 | 1.90E-08 | 6.98E-09 | 4.48E-08 | 9.99E-01 |
| 132.0036  | 302.27 | 20.71 | 20.39 | 19.76 | 20.64 | 9.65E-04 | 5.78E-01 | 9.47E-04 | 9.92E-01 | 6.94E-02 | 7.90E-01 | 5.52E-03 |
| 132.01205 | 41.54  | 13.49 | 16.50 | 17.62 | 14.74 | 5.62E-19 | 1.28E-10 | 7.56E-14 | 2.49E-02 | 5.37E-02 | 7.08E-04 | 4.41E-09 |
| 132.02034 | 48.29  | 17.08 | 17.65 | 17.17 | 17.43 | 3.38E-02 | 3.39E-02 | 9.74E-01 | 3.47E-01 | 1.12E-01 | 6.65E-01 | 6.16E-01 |
| 132.02707 | 263.04 | 18.69 | 18.26 | 18.75 | 17.88 | 1.52E-03 | 2.80E-01 | 9.93E-01 | 5.37E-03 | 1.87E-01 | 4.11E-01 | 2.91E-03 |
| 132.0371  | 63.6   | 15.85 | 15.09 | 15.02 | 14.85 | 1.77E-06 | 5.27E-04 | 1.26E-04 | 4.68E-06 | 9.90E-01 | 6.50E-01 | 8.19E-01 |
| 132.05578 | 278.38 | 20.80 | 21.08 | 20.49 | 19.37 | 4.48E-04 | 8.96E-01 | 8.63E-01 | 2.77E-03 | 4.76E-01 | 3.49E-04 | 3.52E-02 |
| 132.07666 | 69.68  | 28.93 | 28.22 | 28.34 | 28.41 | 2.25E-20 | 7.43E-14 | 1.01E-13 | 9.92E-11 | 3.55E-01 | 4.74E-02 | 7.35E-01 |
| 132.08095 | 38.4   | 19.75 | 18.65 | 19.36 | 19.16 | 2.57E-15 | 7.45E-14 | 6.74E-03 | 2.06E-05 | 1.71E-07 | 4.73E-04 | 4.00E-01 |
| 132.08337 | 193.86 | 15.42 | 10.47 | 12.78 | 10.21 | 7.96E-21 | 7.48E-14 | 5.54E-06 | 7.36E-14 | 1.88E-04 | 9.67E-01 | 4.02E-05 |

|           |        |       |       |       |       |          |          |          |          |          |          |          |
|-----------|--------|-------|-------|-------|-------|----------|----------|----------|----------|----------|----------|----------|
| 132.0866  | 78.65  | 19.70 | 21.26 | 21.22 | 20.62 | 3.60E-19 | 7.38E-14 | 7.37E-14 | 2.02E-06 | 9.97E-01 | 2.63E-03 | 4.83E-03 |
| 132.09681 | 55.77  | 17.80 | 15.71 | 15.34 | 16.60 | 4.73E-12 | 1.48E-08 | 1.74E-11 | 3.45E-03 | 7.02E-01 | 6.15E-02 | 2.35E-03 |
| 132.10191 | 111.26 | 22.88 | 22.09 | 21.03 | 22.00 | 4.74E-10 | 1.31E-02 | 3.80E-11 | 5.46E-03 | 4.32E-04 | 9.86E-01 | 2.27E-03 |
| 132.13201 | 56.17  | 16.37 | 14.78 | 14.65 | 15.22 | 1.53E-08 | 8.75E-07 | 7.55E-08 | 9.57E-04 | 9.76E-01 | 4.89E-01 | 2.59E-01 |
| 132.49307 | 88.07  | 15.73 | 19.45 | 19.84 | 18.27 | 2.42E-46 | 3.65E-14 | 3.65E-14 | 7.16E-14 | 3.93E-01 | 2.35E-05 | 8.90E-09 |
| 132.50097 | 119.37 | 16.77 | 14.58 | 14.38 | 15.85 | 2.12E-14 | 1.13E-10 | 1.42E-12 | 2.09E-02 | 9.18E-01 | 8.16E-04 | 5.68E-05 |
| 132.51666 | 63.3   | 17.55 | 13.23 | 13.61 | 14.97 | 8.02E-21 | 7.25E-14 | 7.41E-14 | 1.41E-07 | 8.23E-01 | 1.13E-03 | 1.71E-02 |
| 132.51993 | 100.99 | 18.13 | 18.26 | 17.19 | 17.86 | 8.63E-04 | 9.63E-01 | 3.62E-03 | 7.61E-01 | 1.00E-03 | 4.97E-01 | 9.99E-02 |
| 132.52221 | 90.82  | 17.93 | 15.52 | 15.51 | 16.02 | 6.14E-33 | 3.67E-14 | 3.65E-14 | 7.52E-14 | 1.00E+00 | 5.76E-02 | 4.98E-02 |
| 132.52877 | 97.85  | 19.63 | 15.26 | 16.72 | 15.90 | 6.36E-51 | 3.65E-14 | 3.65E-14 | 3.65E-14 | 1.13E-08 | 4.29E-02 | 3.78E-03 |
| 132.53293 | 84.28  | 16.97 | 16.20 | 16.83 | 16.62 | 2.79E-03 | 1.73E-03 | 8.99E-01 | 3.67E-01 | 2.07E-02 | 2.35E-01 | 7.88E-01 |
| 132.54105 | 86.34  | 18.09 | 20.48 | 20.89 | 20.21 | 9.59E-35 | 3.87E-14 | 3.65E-14 | 7.24E-14 | 1.84E-01 | 5.70E-01 | 6.81E-03 |
| 132.54434 | 86.77  | 16.36 | 17.41 | 17.89 | 17.47 | 3.61E-17 | 5.31E-09 | 7.34E-14 | 1.65E-09 | 2.07E-02 | 9.84E-01 | 6.71E-02 |
| 132.88955 | 104.39 | 14.42 | 13.69 | 12.47 | 13.80 | 1.49E-02 | 6.23E-01 | 6.90E-03 | 7.45E-01 | 1.99E-01 | 9.98E-01 | 1.58E-01 |
| 132.9027  | 277.97 | 18.84 | 15.63 | 16.37 | 16.09 | 1.72E-35 | 3.65E-14 | 5.50E-14 | 3.92E-14 | 8.86E-03 | 2.30E-01 | 6.34E-01 |
| 132.92918 | 261.63 | 17.03 | 7.15  | 7.37  | 10.23 | 7.18E-51 | 3.65E-14 | 3.65E-14 | 3.85E-14 | 9.80E-01 | 1.58E-06 | 7.58E-06 |
| 132.93316 | 104.13 | 15.76 | 9.87  | 9.14  | 13.60 | 1.12E-32 | 4.56E-14 | 3.65E-14 | 3.14E-04 | 5.11E-01 | 3.40E-10 | 1.39E-13 |
| 132.9552  | 277.91 | 18.04 | 15.84 | 16.09 | 15.71 | 8.68E-13 | 5.52E-10 | 2.81E-08 | 1.74E-10 | 8.78E-01 | 9.84E-01 | 6.93E-01 |
| 132.96597 | 21.82  | 15.05 | 13.15 | 13.43 | 13.75 | 1.33E-14 | 1.90E-13 | 1.18E-10 | 6.81E-07 | 6.47E-01 | 7.36E-02 | 5.54E-01 |
| 132.96953 | 37.35  | 18.77 | 10.69 | 10.77 | 14.50 | 7.22E-74 | 3.65E-14 | 3.65E-14 | 3.67E-14 | 9.95E-01 | 5.47E-14 | 5.83E-14 |
| 132.98722 | 49.19  | 16.82 | 14.99 | 16.95 | 16.67 | 4.04E-17 | 1.43E-13 | 9.42E-01 | 9.00E-01 | 8.23E-14 | 7.16E-11 | 6.21E-01 |
| 132.99352 | 87.4   | 12.85 | 15.94 | 16.11 | 14.54 | 4.69E-16 | 1.05E-12 | 1.14E-13 | 2.47E-04 | 9.75E-01 | 4.75E-03 | 9.93E-04 |
| 133.00096 | 81.3   | 17.63 | 15.14 | 15.00 | 14.68 | 5.00E-15 | 5.37E-10 | 4.49E-11 | 1.23E-12 | 9.86E-01 | 6.52E-01 | 8.39E-01 |
| 133.00693 | 297.64 | 15.89 | 12.97 | 12.47 | 14.27 | 4.55E-26 | 7.18E-14 | 4.16E-14 | 1.22E-06 | 3.43E-01 | 2.33E-04 | 1.02E-07 |
| 133.01474 | 30.54  | 15.80 | 18.02 | 18.52 | 15.45 | 1.12E-22 | 1.03E-10 | 7.63E-14 | 6.94E-01 | 4.10E-01 | 1.91E-12 | 7.53E-04 |
| 133.02884 | 107.01 | 16.72 | 12.24 | 12.74 | 12.82 | 2.84E-25 | 6.01E-14 | 7.38E-14 | 7.43E-14 | 6.31E-01 | 5.33E-01 | 9.97E-01 |
| 133.03181 | 57.97  | 23.81 | 22.27 | 22.98 | 22.66 | 3.52E-44 | 3.65E-14 | 7.41E-14 | 3.65E-14 | 3.58E-13 | 1.71E-04 | 2.54E-03 |
| 133.03411 | 88.81  | 18.98 | 19.45 | 19.13 | 18.83 | 5.10E-01 | 6.48E-01 | 9.82E-01 | 9.84E-01 | 8.66E-01 | 4.68E-01 | 8.94E-01 |
| 133.0436  | 90.74  | 19.74 | 22.56 | 22.55 | 21.73 | 4.21E-26 | 5.81E-14 | 5.76E-14 | 6.13E-12 | 1.00E+00 | 1.32E-02 | 1.42E-02 |
| 133.04965 | 238.81 | 16.71 | 14.95 | 15.89 | 15.22 | 2.27E-19 | 7.46E-14 | 4.42E-05 | 3.74E-13 | 3.88E-06 | 4.74E-01 | 2.70E-03 |
| 133.06481 | 20.3   | 16.74 | 15.98 | 16.60 | 15.33 | 7.63E-09 | 4.88E-03 | 9.27E-01 | 2.65E-08 | 3.76E-02 | 3.34E-02 | 1.06E-06 |
| 133.06882 | 266.07 | 22.88 | 21.10 | 21.02 | 21.33 | 7.23E-05 | 5.81E-04 | 2.46E-04 | 5.13E-03 | 9.98E-01 | 9.62E-01 | 9.11E-01 |
| 133.0737  | 68.28  | 22.03 | 21.72 | 22.04 | 21.77 | 6.78E-06 | 2.41E-04 | 1.00E+00 | 4.82E-03 | 2.60E-04 | 9.04E-01 | 4.78E-03 |
| 133.07603 | 174.88 | 16.65 | 14.58 | 14.61 | 14.96 | 1.09E-18 | 7.56E-14 | 7.80E-14 | 1.26E-10 | 9.99E-01 | 4.38E-01 | 5.08E-01 |
| 133.07987 | 68.07  | 24.27 | 23.83 | 24.10 | 23.92 | 3.95E-08 | 6.12E-08 | 1.05E-01 | 4.06E-05 | 2.18E-03 | 6.55E-01 | 9.03E-02 |
| 133.08346 | 49.3   | 17.62 | 18.03 | 18.38 | 17.62 | 3.51E-03 | 3.04E-01 | 6.47E-03 | 1.00E+00 | 4.54E-01 | 3.39E-01 | 1.07E-02 |
| 133.08729 | 296.91 | 16.12 | 15.69 | 15.76 | 14.60 | 1.92E-06 | 3.87E-01 | 5.37E-01 | 6.70E-07 | 9.94E-01 | 1.00E-03 | 3.42E-04 |
| 133.09004 | 74.36  | 14.67 | 14.94 | 14.92 | 14.54 | 4.13E-01 | 7.45E-01 | 7.74E-01 | 9.65E-01 | 1.00E+00 | 4.94E-01 | 5.22E-01 |
| 133.09804 | 63.43  | 21.16 | 21.91 | 21.42 | 21.47 | 7.61E-04 | 2.28E-04 | 4.75E-01 | 3.23E-01 | 3.70E-02 | 9.90E-02 | 9.90E-01 |
| 133.10116 | 273.08 | 19.02 | 16.20 | 16.34 | 17.08 | 1.81E-18 | 7.36E-14 | 7.96E-14 | 3.48E-08 | 9.75E-01 | 4.01E-02 | 1.05E-01 |
| 133.10527 | 51.27  | 23.60 | 22.66 | 22.80 | 22.61 | 2.28E-30 | 4.16E-14 | 7.49E-14 | 3.87E-14 | 2.82E-01 | 9.32E-01 | 9.02E-02 |
| 133.10811 | 39.48  | 18.14 | 17.08 | 17.38 | 17.10 | 2.12E-15 | 3.31E-13 | 9.25E-08 | 2.94E-12 | 1.25E-01 | 9.98E-01 | 2.01E-01 |
| 133.49185 | 88.82  | 15.69 | 15.99 | 16.22 | 15.80 | 3.52E-02 | 3.81E-01 | 2.67E-02 | 9.46E-01 | 6.49E-01 | 7.64E-01 | 1.50E-01 |
| 133.49958 | 30.82  | 16.61 | 12.81 | 13.10 | 13.93 | 2.77E-24 | 6.38E-14 | 7.36E-14 | 1.28E-11 | 8.53E-01 | 1.43E-02 | 1.07E-01 |
| 133.51349 | 104.03 | 16.01 | 14.78 | 15.03 | 14.82 | 2.79E-06 | 1.57E-05 | 8.00E-04 | 5.48E-05 | 7.73E-01 | 9.99E-01 | 8.64E-01 |
| 133.52043 | 28.13  | 15.32 | 13.60 | 16.52 | 16.82 | 1.17E-15 | 2.69E-05 | 5.89E-03 | 4.92E-04 | 1.58E-12 | 1.31E-13 | 8.60E-01 |
| 133.53577 | 247.27 | 19.93 | 16.40 | 16.51 | 17.45 | 3.29E-40 | 3.65E-14 | 3.65E-14 | 7.09E-14 | 9.70E-01 | 2.00E-04 | 9.52E-04 |
| 133.53579 | 86.01  | 23.14 | 22.98 | 23.41 | 22.77 | 3.74E-01 | 9.70E-01 | 8.67E-01 | 7.38E-01 | 6.36E-01 | 9.43E-01 | 3.13E-01 |
| 133.54438 | 88.81  | 16.10 | 19.70 | 19.67 | 18.69 | 4.77E-23 | 7.23E-14 | 7.27E-14 | 7.96E-11 | 1.00E+00 | 3.99E-02 | 4.52E-02 |
| 133.56121 | 47.68  | 17.79 | 15.67 | 16.12 | 16.30 | 4.62E-20 | 7.25E-14 | 3.65E-13 | 2.64E-10 | 1.52E-01 | 2.39E-02 | 8.44E-01 |
| 133.92687 | 99.48  | 20.48 | 16.50 | 16.12 | 18.08 | 2.92E-46 | 3.65E-14 | 3.65E-14 | 7.34E-14 | 4.59E-01 | 8.37E-08 | 1.97E-11 |
| 133.9302  | 115.82 | 17.92 | 13.86 | 14.43 | 16.08 | 4.50E-44 | 3.65E-14 | 3.65E-14 | 1.08E-11 | 9.78E-02 | 8.07E-14 | 3.21E-09 |
| 133.96801 | 256.69 | 20.51 | 17.11 | 15.82 | 17.05 | 4.34E-15 | 1.40E-08 | 8.08E-14 | 1.82E-08 | 9.85E-02 | 1.00E+00 | 1.42E-01 |
| 133.97433 | 264.66 | 19.73 | 16.33 | 15.64 | 17.61 | 1.46E-42 | 3.65E-14 | 3.65E-14 | 1.02E-13 | 3.30E-02 | 9.72E-06 | 3.86E-12 |
| 133.98868 | 30.43  | 11.71 | 11.78 | 17.36 | 16.58 | 2.55E-30 | 9.99E-01 | 5.52E-14 | 7.52E-14 | 6.83E-04 | 7.53E-14 | 4.65E-01 |
| 134.01871 | 54.58  | 20.60 | 18.20 | 18.85 | 18.13 | 5.66E-28 | 4.74E-14 | 1.07E-13 | 4.70E-14 | 1.43E-02 | 9.88E-01 | 6.33E-03 |
| 134.02351 | 108.63 | 18.01 | 14.97 | 15.29 | 15.18 | 2.84E-30 | 3.85E-14 | 6.07E-14 | 5.81E-14 | 6.17E-01 | 8.70E-01 | 9.76E-01 |
| 134.02592 | 75.95  | 19.57 | 17.49 | 18.58 | 18.84 | 3.31E-22 | 4.59E-14 | 5.42E-07 | 6.72E-04 | 8.20E-08 | 1.17E-10 | 5.12E-01 |
| 134.02706 | 148.49 | 16.99 | 16.52 | 16.18 | 17.03 | 1.34E-05 | 5.82E-02 | 9.70E-05 | 9.96E-01 | 2.81E-01 | 4.88E-02 | 1.14E-04 |
| 134.03556 | 66.25  | 19.67 | 17.74 | 18.55 | 18.07 | 7.04E-41 | 3.65E-14 | 7.55E-14 | 3.65E-14 | 8.56E-10 | 3.90E-02 | 8.49E-04 |
| 134.04481 | 81.85  | 26.04 | 25.72 | 26.21 | 25.70 | 1.35E-05 | 2.31E-02 | 4.54E-01 | 1.80E-02 | 2.00E-04 | 9.99E-01 | 1.61E-04 |
| 134.05062 | 79.11  | 15.91 | 15.88 | 15.48 | 14.84 | 1.51E-02 | 1.00E+00 | 6.06E-01 | 1.75E-02 | 6.75E-01 | 2.76E-02 | 3.08E-01 |
| 134.05776 | 71.41  | 17.07 | 14.63 | 15.28 | 15.53 | 2.84E-23 | 4.76E-14 | 1.02E-13 | 1.48E-10 | 1.68E-02 | 5.87E-04 | 6.99E-01 |
| 134.06002 | 278.55 | 18.87 | 16.98 | 16.39 | 17.06 | 1.20E-15 | 1.30E-09 | 7.78E-14 | 1.60E-08 | 1.89E-01 | 9.93E-01 | 1.18E-01 |
| 134.06383 | 71.74  | 19.46 | 19.16 | 19.32 | 19.17 | 2.08E-02 | 2.89E-02 | 5.10E-01 | 4.74E-02 | 5.09E-01 | 1.00E+00 | 5.99E-01 |
| 134.07051 | 278.28 | 16.63 | 14.70 | 14.73 | 14.75 | 1.79E-06 | 3.52E-05 | 3.99E-05 | 9.71E-05 | 1.00E+00 | 9.99E-01 | 1.00E+00 |
| 134.07688 | 55.95  | 16.84 | 15.48 | 15.79 | 16.10 | 2.14E-32 | 3.65E-14 | 6.01E-14 | 1.07E-11 | 1.05E-02 | 3.79E-08 | 1.41E-02 |
| 134.08112 | 275.35 | 22.97 | 20.91 | 20.48 | 21.40 | 3.12E-09 | 1.79E-06 | 4.38E-09 | 6.52E-04 | 7.09E-01 | 6.39E-01 | 1.17E-01 |

|           |        |       |       |       |       |          |          |          |          |          |          |          |
|-----------|--------|-------|-------|-------|-------|----------|----------|----------|----------|----------|----------|----------|
| 134.09069 | 293.01 | 17.26 | 19.86 | 20.40 | 19.03 | 9.91E-12 | 3.38E-08 | 1.90E-11 | 4.57E-04 | 6.17E-01 | 2.62E-01 | 1.44E-02 |
| 134.09639 | 191.22 | 16.44 | 13.49 | 13.56 | 13.96 | 1.92E-41 | 3.65E-14 | 3.65E-14 | 3.72E-14 | 9.85E-01 | 1.04E-01 | 2.06E-01 |
| 134.10055 | 80.68  | 16.86 | 16.65 | 15.84 | 16.33 | 5.98E-05 | 7.80E-01 | 3.51E-05 | 9.46E-02 | 2.50E-03 | 5.23E-01 | 1.56E-01 |
| 134.10616 | 42.48  | 19.44 | 18.15 | 18.26 | 18.12 | 5.46E-43 | 3.65E-14 | 3.65E-14 | 3.65E-14 | 5.78E-01 | 9.92E-01 | 4.20E-01 |
| 134.10865 | 40.1   | 17.89 | 16.16 | 16.41 | 16.37 | 4.88E-49 | 3.65E-14 | 3.65E-14 | 3.65E-14 | 6.89E-02 | 1.81E-01 | 9.84E-01 |
| 134.11755 | 28.13  | 18.33 | 17.53 | 17.68 | 17.75 | 1.02E-04 | 1.06E-04 | 2.29E-03 | 1.27E-02 | 8.51E-01 | 6.52E-01 | 9.81E-01 |
| 134.11758 | 132.88 | 18.99 | 19.22 | 19.41 | 19.03 | 2.22E-01 | 7.25E-01 | 2.17E-01 | 9.98E-01 | 8.29E-01 | 8.49E-01 | 3.52E-01 |
| 134.49832 | 249.22 | 16.02 | 15.53 | 16.02 | 16.69 | 3.90E-04 | 2.09E-01 | 1.00E+00 | 4.37E-02 | 2.32E-01 | 9.67E-05 | 4.97E-02 |
| 134.49834 | 136.05 | 16.84 | 16.41 | 17.23 | 17.05 | 3.65E-03 | 2.16E-01 | 2.86E-01 | 7.94E-01 | 2.13E-03 | 3.53E-02 | 8.64E-01 |
| 134.52059 | 75.66  | 16.40 | 15.64 | 15.87 | 15.79 | 1.04E-01 | 9.01E-02 | 3.44E-01 | 2.61E-01 | 9.04E-01 | 9.71E-01 | 9.96E-01 |
| 134.53382 | 90.83  | 17.04 | 14.67 | 14.68 | 14.91 | 1.26E-09 | 8.91E-08 | 7.59E-08 | 3.24E-06 | 1.00E+00 | 9.46E-01 | 9.51E-01 |
| 134.53789 | 97.6   | 16.93 | 15.69 | 16.00 | 15.55 | 1.47E-04 | 1.04E-03 | 2.31E-02 | 3.13E-04 | 7.84E-01 | 9.79E-01 | 5.53E-01 |
| 134.54393 | 89.59  | 14.75 | 15.31 | 14.98 | 15.20 | 1.37E-01 | 1.22E-01 | 7.84E-01 | 3.06E-01 | 5.92E-01 | 9.77E-01 | 8.48E-01 |
| 134.5523  | 86.71  | 18.13 | 20.70 | 20.44 | 20.13 | 5.14E-26 | 4.90E-14 | 7.25E-14 | 8.29E-14 | 6.67E-01 | 8.10E-02 | 5.60E-01 |
| 134.92802 | 86.06  | 17.46 | 8.70  | 11.55 | 10.10 | 1.42E-38 | 3.65E-14 | 6.78E-14 | 3.67E-14 | 9.18E-06 | 9.19E-02 | 6.97E-02 |
| 134.95391 | 287.07 | 17.68 | 15.46 | 15.23 | 15.38 | 1.75E-19 | 1.96E-13 | 7.41E-14 | 1.45E-13 | 8.32E-01 | 9.91E-01 | 9.51E-01 |
| 134.97244 | 41.2   | 17.20 | 13.96 | 15.92 | 14.72 | 8.55E-36 | 3.65E-14 | 5.24E-08 | 5.43E-14 | 7.68E-14 | 6.23E-03 | 1.89E-06 |
| 134.9913  | 267.45 | 17.70 | 15.80 | 15.92 | 16.04 | 7.20E-09 | 1.51E-07 | 7.24E-07 | 9.59E-06 | 9.85E-01 | 9.05E-01 | 9.86E-01 |
| 135.00287 | 45.92  | 20.77 | 21.68 | 21.95 | 21.66 | 1.15E-23 | 8.23E-14 | 5.21E-14 | 1.74E-13 | 6.68E-02 | 9.89E-01 | 5.26E-02 |
| 135.01724 | 125.66 | 13.49 | 14.03 | 14.27 | 13.09 | 1.15E-01 | 7.02E-01 | 4.01E-01 | 8.65E-01 | 9.68E-01 | 2.89E-01 | 1.17E-01 |
| 135.02752 | 45.22  | 19.09 | 16.60 | 17.65 | 17.43 | 2.21E-46 | 3.65E-14 | 5.63E-14 | 3.74E-14 | 1.62E-12 | 4.64E-08 | 4.13E-01 |
| 135.03018 | 257.12 | 17.42 | 18.93 | 19.56 | 17.41 | 8.16E-30 | 2.26E-13 | 4.34E-14 | 1.00E+00 | 6.44E-03 | 1.99E-12 | 5.74E-14 |
| 135.04407 | 201.01 | 17.14 | 14.38 | 14.68 | 14.83 | 1.74E-36 | 3.65E-14 | 3.67E-14 | 4.45E-14 | 4.22E-01 | 1.34E-01 | 8.97E-01 |
| 135.04408 | 21.15  | 16.19 | 12.82 | 13.57 | 14.46 | 1.09E-30 | 3.65E-14 | 6.96E-14 | 7.08E-10 | 1.96E-02 | 1.63E-08 | 4.46E-03 |
| 135.04817 | 79.09  | 21.29 | 21.24 | 21.73 | 21.07 | 2.09E-05 | 9.79E-01 | 3.91E-03 | 3.55E-01 | 1.49E-03 | 6.14E-01 | 1.38E-05 |
| 135.0532  | 91.13  | 16.10 | 17.09 | 16.84 | 17.00 | 9.79E-06 | 2.45E-05 | 2.61E-03 | 2.31E-04 | 6.43E-01 | 9.79E-01 | 8.77E-01 |
| 135.05528 | 204.58 | 17.21 | 14.29 | 14.61 | 15.19 | 6.00E-33 | 3.65E-14 | 3.83E-14 | 7.56E-14 | 4.72E-01 | 6.29E-04 | 5.35E-02 |
| 135.06336 | 281.55 | 16.92 | 15.85 | 16.03 | 15.14 | 1.23E-14 | 6.62E-07 | 4.31E-05 | 7.38E-14 | 7.97E-01 | 4.02E-03 | 1.22E-04 |
| 135.06668 | 68.66  | 21.85 | 22.45 | 22.57 | 21.83 | 3.73E-05 | 7.82E-03 | 7.27E-04 | 1.00E+00 | 9.24E-01 | 1.06E-02 | 1.21E-03 |
| 135.07473 | 281.05 | 18.08 | 17.29 | 17.68 | 16.30 | 8.31E-14 | 8.96E-04 | 2.10E-01 | 1.05E-13 | 2.44E-01 | 5.61E-05 | 5.66E-09 |
| 135.08042 | 21.77  | 17.22 | 14.16 | 14.75 | 15.63 | 2.54E-46 | 2.84E-09 | 3.73E-10 | 2.09E-08 | 9.92E-01 | 9.98E-01 | 9.65E-01 |
| 135.08042 | 285.89 | 17.63 | 16.31 | 16.25 | 16.35 | 2.65E-12 | 3.65E-14 | 3.65E-14 | 7.43E-14 | 3.98E-03 | 1.86E-13 | 9.46E-06 |
| 135.0845  | 277.2  | 19.81 | 15.96 | 15.94 | 16.62 | 1.20E-30 | 3.87E-14 | 3.76E-14 | 7.23E-14 | 1.00E+00 | 2.19E-01 | 1.92E-01 |
| 135.08774 | 299.52 | 15.21 | 14.93 | 14.48 | 12.92 | 1.13E-07 | 8.76E-01 | 2.09E-01 | 9.30E-08 | 6.56E-01 | 7.47E-06 | 7.34E-04 |
| 135.08777 | 182.92 | 16.31 | 14.68 | 14.30 | 14.19 | 8.03E-26 | 8.34E-14 | 6.67E-14 | 6.16E-14 | 2.16E-01 | 7.26E-02 | 9.40E-01 |
| 135.09169 | 207.71 | 16.46 | 14.01 | 14.21 | 14.81 | 9.58E-43 | 3.65E-14 | 3.65E-14 | 6.69E-14 | 5.80E-01 | 9.07E-06 | 1.33E-03 |
| 135.11677 | 24.39  | 18.21 | 16.66 | 17.13 | 17.53 | 1.88E-31 | 3.65E-14 | 7.42E-14 | 4.48E-08 | 3.07E-04 | 1.49E-11 | 3.58E-03 |
| 135.11681 | 285.61 | 19.29 | 16.76 | 16.84 | 17.40 | 3.52E-17 | 8.74E-14 | 1.17E-13 | 1.52E-08 | 9.94E-01 | 1.72E-01 | 2.67E-01 |
| 135.11686 | 176.02 | 18.65 | 17.60 | 17.73 | 17.75 | 1.80E-07 | 1.13E-06 | 1.85E-05 | 6.51E-05 | 9.24E-01 | 8.89E-01 | 9.99E-01 |
| 135.44963 | 113.48 | 15.72 | 10.48 | 13.80 | 10.78 | 1.02E-19 | 7.49E-14 | 4.08E-03 | 9.13E-14 | 1.89E-07 | 9.61E-01 | 4.36E-06 |
| 135.50618 | 138.04 | 16.51 | 15.79 | 16.04 | 15.45 | 1.06E-04 | 9.14E-03 | 1.57E-01 | 4.74E-05 | 7.06E-01 | 4.82E-01 | 6.42E-02 |
| 135.51774 | 31.11  | 13.54 | 13.18 | 15.54 | 14.89 | 6.56E-06 | 8.87E-01 | 3.51E-04 | 4.23E-02 | 3.20E-05 | 7.14E-03 | 5.86E-01 |
| 135.53226 | 98.36  | 17.85 | 16.96 | 16.64 | 16.69 | 2.76E-04 | 2.22E-02 | 5.72E-04 | 1.71E-03 | 7.40E-01 | 8.38E-01 | 9.99E-01 |
| 135.55109 | 82.93  | 14.76 | 17.08 | 16.74 | 16.63 | 5.26E-13 | 8.43E-12 | 3.37E-09 | 7.84E-08 | 7.13E-01 | 5.17E-01 | 9.85E-01 |
| 135.92632 | 107.78 | 16.77 | 10.37 | 11.06 | 14.48 | 2.46E-23 | 7.16E-14 | 7.49E-14 | 1.89E-03 | 6.87E-01 | 7.76E-09 | 1.56E-06 |
| 135.96511 | 221.92 | 18.61 | 15.10 | 14.25 | 16.11 | 5.29E-19 | 9.09E-13 | 7.41E-14 | 6.82E-07 | 2.42E-01 | 1.45E-01 | 5.33E-04 |
| 135.97012 | 142.6  | 17.84 | 13.80 | 13.38 | 15.69 | 2.17E-46 | 3.65E-14 | 3.65E-14 | 3.29E-13 | 4.00E-01 | 3.34E-10 | 9.49E-14 |
| 135.97663 | 57.37  | 18.35 | 15.47 | 17.16 | 15.96 | 1.14E-19 | 7.45E-14 | 3.52E-04 | 5.84E-13 | 2.69E-07 | 3.91E-01 | 6.47E-04 |
| 135.99223 | 23.4   | 16.06 | 9.82  | 10.43 | 11.00 | 1.15E-90 | 3.65E-14 | 3.65E-14 | 3.65E-14 | 1.52E-02 | 2.41E-07 | 2.84E-02 |
| 135.99446 | 94.65  | 14.15 | 15.01 | 15.86 | 14.40 | 2.02E-03 | 2.57E-01 | 1.56E-03 | 9.54E-01 | 2.87E-01 | 6.06E-01 | 1.69E-02 |
| 136.00109 | 95.37  | 15.30 | 14.79 | 15.75 | 15.60 | 1.40E-02 | 3.26E-01 | 4.38E-01 | 7.63E-01 | 1.12E-02 | 5.50E-02 | 9.67E-01 |
| 136.00636 | 120.11 | 14.30 | 15.34 | 16.09 | 16.10 | 6.30E-06 | 3.62E-02 | 2.85E-05 | 5.20E-05 | 2.36E-01 | 2.53E-01 | 1.00E+00 |
| 136.01167 | 86.51  | 15.20 | 15.77 | 16.12 | 15.35 | 2.76E-08 | 1.65E-03 | 5.48E-08 | 7.85E-01 | 1.31E-01 | 5.26E-02 | 2.46E-05 |
| 136.01429 | 39.3   | 19.80 | 17.41 | 17.75 | 18.34 | 8.84E-34 | 3.65E-14 | 3.83E-14 | 1.29E-13 | 2.18E-01 | 3.38E-06 | 5.89E-03 |
| 136.02154 | 267.28 | 20.91 | 19.40 | 19.55 | 19.67 | 4.86E-08 | 3.69E-07 | 4.10E-06 | 6.30E-05 | 9.52E-01 | 7.91E-01 | 9.75E-01 |
| 136.02439 | 85.17  | 16.64 | 18.26 | 18.27 | 18.10 | 3.72E-17 | 2.19E-13 | 1.29E-13 | 6.46E-11 | 1.00E+00 | 8.72E-01 | 8.33E-01 |
| 136.0392  | 203.03 | 16.91 | 15.89 | 16.59 | 16.95 | 4.04E-06 | 1.53E-05 | 4.09E-01 | 9.98E-01 | 8.15E-03 | 2.28E-05 | 3.57E-01 |
| 136.04839 | 57.15  | 22.59 | 22.32 | 22.34 | 22.13 | 6.92E-05 | 2.76E-02 | 4.19E-02 | 1.73E-05 | 9.98E-01 | 1.91E-01 | 1.30E-01 |
| 136.05557 | 107.47 | 14.85 | 13.88 | 14.20 | 14.40 | 3.02E-04 | 1.16E-04 | 1.91E-02 | 2.09E-01 | 4.89E-01 | 1.19E-01 | 8.25E-01 |
| 136.06171 | 282.03 | 22.99 | 22.91 | 22.56 | 22.11 | 3.92E-02 | 9.95E-01 | 5.26E-01 | 3.79E-02 | 7.07E-01 | 8.45E-02 | 5.31E-01 |
| 136.07567 | 290.25 | 20.42 | 18.11 | 18.23 | 18.85 | 3.86E-18 | 7.38E-14 | 8.48E-14 | 6.00E-08 | 9.67E-01 | 3.69E-02 | 1.07E-01 |
| 136.0757  | 54.93  | 22.36 | 21.43 | 22.10 | 21.78 | 1.95E-24 | 4.19E-14 | 5.21E-03 | 6.80E-11 | 1.81E-13 | 2.91E-04 | 9.02E-04 |
| 136.0968  | 287.4  | 18.56 | 16.84 | 16.45 | 16.97 | 7.42E-14 | 3.14E-09 | 4.18E-13 | 1.03E-07 | 4.88E-01 | 9.67E-01 | 2.51E-01 |
| 136.10642 | 262.5  | 16.37 | 14.87 | 15.32 | 14.43 | 7.47E-11 | 2.91E-07 | 5.07E-04 | 1.04E-10 | 3.51E-01 | 4.15E-01 | 9.48E-03 |
| 136.12021 | 194.37 | 16.18 | 12.85 | 13.04 | 13.86 | 1.12E-31 | 3.67E-14 | 3.74E-14 | 7.76E-14 | 8.97E-01 | 1.80E-03 | 1.56E-02 |
| 136.49633 | 39.68  | 17.46 | 10.58 | 11.00 | 12.53 | 6.21E-54 | 3.65E-14 | 3.65E-14 | 3.65E-14 | 6.46E-01 | 3.23E-06 | 3.88E-04 |
| 136.50753 | 257.92 | 17.77 | 15.38 | 15.93 | 17.06 | 4.03E-37 | 3.65E-14 | 4.47E-14 | 1.42E-04 | 4.75E-03 | 7.41E-14 | 1.10E-09 |
| 136.51401 | 96.37  | 18.70 | 15.48 | 15.96 | 16.04 | 1.58E-37 | 3.65E-14 | 3.67E-14 | 4.10E-14 | 1.37E-01 | 7.39E-02 | 9.86E-01 |

|           |        |       |       |       |       |          |          |          |          |          |          |          |
|-----------|--------|-------|-------|-------|-------|----------|----------|----------|----------|----------|----------|----------|
| 136.52719 | 82.26  | 14.47 | 16.74 | 16.36 | 16.22 | 1.52E-08 | 4.54E-08 | 5.63E-06 | 5.68E-05 | 7.56E-01 | 5.74E-01 | 9.87E-01 |
| 136.55148 | 24.9   | 14.75 | 14.49 | 13.14 | 16.38 | 5.84E-12 | 9.01E-01 | 1.93E-04 | 3.38E-04 | 4.04E-03 | 3.79E-05 | 4.81E-13 |
| 136.55336 | 79.14  | 13.90 | 16.15 | 15.54 | 14.37 | 5.88E-08 | 2.12E-07 | 2.08E-04 | 6.50E-01 | 4.41E-01 | 1.72E-04 | 2.50E-02 |
| 136.93102 | 275.75 | 24.03 | 23.90 | 24.20 | 23.75 | 3.95E-02 | 8.12E-01 | 6.97E-01 | 2.64E-01 | 2.23E-01 | 7.88E-01 | 2.73E-02 |
| 136.93107 | 27.62  | 16.60 | 18.54 | 19.55 | 18.29 | 3.48E-63 | 3.65E-14 | 3.65E-14 | 3.65E-14 | 2.67E-13 | 2.04E-01 | 7.36E-14 |
| 136.93116 | 104.41 | 24.79 | 23.41 | 24.27 | 23.25 | 1.98E-16 | 5.37E-12 | 2.39E-02 | 1.64E-13 | 3.42E-05 | 8.42E-01 | 1.21E-06 |
| 136.94025 | 42.43  | 17.47 | 15.05 | 15.33 | 15.71 | 4.43E-32 | 3.65E-14 | 4.07E-14 | 7.52E-14 | 4.42E-01 | 4.47E-03 | 2.04E-01 |
| 136.96368 | 19.43  | 17.78 | 10.23 | 10.98 | 12.01 | 5.06E-75 | 3.65E-14 | 3.65E-14 | 3.65E-14 | 5.61E-02 | 1.02E-07 | 4.09E-03 |
| 137.00677 | 75.65  | 15.48 | 15.62 | 15.14 | 15.83 | 2.80E-01 | 9.74E-01 | 7.59E-01 | 7.42E-01 | 5.20E-01 | 9.39E-01 | 2.24E-01 |
| 137.02498 | 189.71 | 16.83 | 14.75 | 14.93 | 14.93 | 6.15E-32 | 3.70E-14 | 4.41E-14 | 5.43E-14 | 7.11E-01 | 7.31E-01 | 1.00E+00 |
| 137.0458  | 204.4  | 21.38 | 25.53 | 25.94 | 24.53 | 7.78E-39 | 3.65E-14 | 3.65E-14 | 7.23E-14 | 5.65E-01 | 1.07E-02 | 9.05E-05 |
| 137.0514  | 54.72  | 18.09 | 17.24 | 16.90 | 17.21 | 1.50E-14 | 4.60E-08 | 9.29E-14 | 2.95E-08 | 8.72E-02 | 9.96E-01 | 1.65E-01 |
| 137.05502 | 89.03  | 17.56 | 19.32 | 19.08 | 18.81 | 7.50E-12 | 4.68E-11 | 9.83E-09 | 7.53E-06 | 7.66E-01 | 1.91E-01 | 7.09E-01 |
| 137.05969 | 290.69 | 18.16 | 15.67 | 15.46 | 16.79 | 5.40E-15 | 1.45E-11 | 2.45E-13 | 5.33E-04 | 9.23E-01 | 9.90E-03 | 1.11E-03 |
| 137.06506 | 281.38 | 18.08 | 16.93 | 16.95 | 16.84 | 2.20E-07 | 1.65E-05 | 1.67E-05 | 5.12E-06 | 1.00E+00 | 9.83E-01 | 9.76E-01 |
| 137.0717  | 52.6   | 23.10 | 23.13 | 23.13 | 22.54 | 3.62E-04 | 9.96E-01 | 9.96E-01 | 2.08E-03 | 1.00E+00 | 1.45E-03 | 1.33E-03 |
| 137.07588 | 221.05 | 15.38 | 17.35 | 17.09 | 16.94 | 3.42E-20 | 7.61E-14 | 8.78E-14 | 7.35E-12 | 5.95E-01 | 2.30E-01 | 8.98E-01 |
| 137.07899 | 50.11  | 18.69 | 16.90 | 17.78 | 17.55 | 5.25E-40 | 3.65E-14 | 7.89E-14 | 6.85E-14 | 1.73E-13 | 1.29E-07 | 1.36E-01 |
| 137.08217 | 181.38 | 16.84 | 12.71 | 13.20 | 13.31 | 1.23E-33 | 3.65E-14 | 3.94E-14 | 5.54E-14 | 4.19E-01 | 2.59E-01 | 9.85E-01 |
| 137.09604 | 22.51  | 17.29 | 15.52 | 16.06 | 16.39 | 1.27E-22 | 4.87E-14 | 5.31E-13 | 3.33E-07 | 4.81E-03 | 1.81E-06 | 1.78E-01 |
| 137.09605 | 287.64 | 18.74 | 17.00 | 17.10 | 17.08 | 4.75E-16 | 7.36E-13 | 7.01E-12 | 1.74E-11 | 9.71E-01 | 9.89E-01 | 1.00E+00 |
| 137.10729 | 25.62  | 17.44 | 16.16 | 16.17 | 16.27 | 2.44E-06 | 3.45E-05 | 3.16E-05 | 2.92E-04 | 1.00E+00 | 9.82E-01 | 9.84E-01 |
| 137.10736 | 192.22 | 16.30 | 14.29 | 14.08 | 14.77 | 2.91E-25 | 7.24E-14 | 5.03E-14 | 7.05E-12 | 7.21E-01 | 1.07E-01 | 5.83E-03 |
| 137.13242 | 23.53  | 17.31 | 14.87 | 15.17 | 16.25 | 9.24E-42 | 3.65E-14 | 3.65E-14 | 7.09E-10 | 2.22E-01 | 8.80E-14 | 7.87E-10 |
| 137.13245 | 292.69 | 17.72 | 16.04 | 16.33 | 16.21 | 5.04E-12 | 1.38E-10 | 7.56E-08 | 1.67E-08 | 6.52E-01 | 9.16E-01 | 9.64E-01 |
| 137.13251 | 165.1  | 18.19 | 16.44 | 16.35 | 16.98 | 3.70E-15 | 3.55E-12 | 2.67E-13 | 3.38E-06 | 9.81E-01 | 1.16E-01 | 4.50E-02 |
| 137.51527 | 96.1   | 17.51 | 16.16 | 13.82 | 16.05 | 4.82E-22 | 2.45E-04 | 4.63E-14 | 1.08E-04 | 1.65E-10 | 9.91E-01 | 2.46E-09 |
| 137.52422 | 87.31  | 13.47 | 16.11 | 15.37 | 15.69 | 3.01E-13 | 1.71E-12 | 2.79E-07 | 5.69E-09 | 1.49E-01 | 6.58E-01 | 7.99E-01 |
| 137.55543 | 79.34  | 15.22 | 16.18 | 15.44 | 15.95 | 7.18E-03 | 9.08E-03 | 8.80E-01 | 8.63E-02 | 8.26E-02 | 8.94E-01 | 3.72E-01 |
| 137.96101 | 231.86 | 15.77 | 9.88  | 9.55  | 12.45 | 4.29E-20 | 7.42E-14 | 7.49E-14 | 8.85E-06 | 9.59E-01 | 1.44E-03 | 1.93E-04 |
| 137.96104 | 114.13 | 16.71 | 11.88 | 13.95 | 13.50 | 1.83E-16 | 7.42E-14 | 7.83E-07 | 2.64E-08 | 6.05E-04 | 1.58E-02 | 8.41E-01 |
| 137.96415 | 274.49 | 17.89 | 13.20 | 11.14 | 14.95 | 2.45E-25 | 1.10E-13 | 3.76E-14 | 3.92E-06 | 2.21E-03 | 1.78E-02 | 3.23E-09 |
| 137.97462 | 111.29 | 16.79 | 14.16 | 14.04 | 14.11 | 3.84E-11 | 3.45E-08 | 5.23E-09 | 3.93E-08 | 9.92E-01 | 9.99E-01 | 9.99E-01 |
| 137.98746 | 286.16 | 18.51 | 14.49 | 14.02 | 16.21 | 3.33E-33 | 3.85E-14 | 3.65E-14 | 7.66E-10 | 5.03E-01 | 1.17E-05 | 1.01E-08 |
| 137.98751 | 146.26 | 18.12 | 14.15 | 13.87 | 15.97 | 4.79E-47 | 3.65E-14 | 3.65E-14 | 9.31E-14 | 6.96E-01 | 2.42E-10 | 3.38E-13 |
| 137.99123 | 40.33  | 13.47 | 16.71 | 19.75 | 18.40 | 4.62E-58 | 4.96E-14 | 3.65E-14 | 3.65E-14 | 7.21E-14 | 3.93E-07 | 7.19E-05 |
| 138.01299 | 48.34  | 20.61 | 19.90 | 20.80 | 19.33 | 5.25E-18 | 4.86E-05 | 6.19E-01 | 3.77E-13 | 3.23E-07 | 3.22E-03 | 7.42E-01 |
| 138.01708 | 36.77  | 17.06 | 15.37 | 16.68 | 15.85 | 5.18E-13 | 4.19E-12 | 3.06E-01 | 1.30E-06 | 1.60E-07 | 1.83E-01 | 2.30E-03 |
| 138.01739 | 163.74 | 16.33 | 13.93 | 14.00 | 14.82 | 3.93E-38 | 3.65E-14 | 3.65E-14 | 7.38E-14 | 9.80E-01 | 4.79E-06 | 2.25E-05 |
| 138.02826 | 67.48  | 20.88 | 21.51 | 21.58 | 21.67 | 1.18E-11 | 2.99E-07 | 8.93E-09 | 4.59E-10 | 9.34E-01 | 5.65E-01 | 8.84E-01 |
| 138.04004 | 86.24  | 15.69 | 15.18 | 15.25 | 15.69 | 2.50E-03 | 1.54E-02 | 4.82E-02 | 1.00E+00 | 9.75E-01 | 2.36E-02 | 6.61E-02 |
| 138.04278 | 284.33 | 16.05 | 17.94 | 18.36 | 17.49 | 3.20E-14 | 1.03E-09 | 1.46E-13 | 7.26E-06 | 4.56E-01 | 4.45E-01 | 1.89E-02 |
| 138.04285 | 43.07  | 22.48 | 20.68 | 21.00 | 21.33 | 2.82E-16 | 7.34E-14 | 1.87E-11 | 5.59E-07 | 4.18E-01 | 1.40E-02 | 3.99E-01 |
| 138.04914 | 198.14 | 16.26 | 21.62 | 21.97 | 20.21 | 1.75E-35 | 3.65E-14 | 3.65E-14 | 7.53E-14 | 8.46E-01 | 7.21E-03 | 3.68E-04 |
| 138.055   | 162.25 | 19.62 | 21.44 | 20.26 | 21.59 | 2.34E-13 | 5.11E-10 | 7.10E-02 | 6.30E-11 | 1.55E-04 | 9.55E-01 | 2.61E-05 |
| 138.06619 | 19.69  | 18.98 | 17.51 | 17.53 | 17.75 | 6.19E-38 | 3.65E-14 | 3.65E-14 | 4.65E-14 | 9.95E-01 | 1.34E-01 | 2.11E-01 |
| 138.07555 | 49.84  | 19.30 | 18.74 | 18.79 | 18.21 | 1.19E-08 | 3.27E-03 | 8.42E-03 | 1.22E-09 | 9.90E-01 | 9.37E-03 | 3.17E-03 |
| 138.09143 | 152.07 | 17.29 | 14.88 | 15.24 | 15.48 | 2.98E-36 | 3.65E-14 | 3.70E-14 | 6.81E-14 | 1.48E-01 | 3.65E-03 | 4.94E-01 |
| 138.47096 | 121.32 | 15.87 | 15.82 | 16.88 | 15.67 | 2.71E-04 | 9.99E-01 | 3.16E-03 | 9.18E-01 | 2.78E-03 | 9.64E-01 | 6.58E-01 |
| 138.51184 | 90.03  | 20.34 | 15.44 | 15.04 | 17.55 | 1.55E-62 | 3.65E-14 | 3.65E-14 | 5.07E-14 | 3.80E-01 | 1.30E-13 | 7.23E-14 |
| 138.5147  | 36.1   | 14.76 | 14.93 | 16.26 | 14.42 | 6.07E-06 | 9.65E-01 | 1.70E-04 | 7.87E-01 | 1.74E-03 | 5.31E-01 | 9.09E-06 |
| 138.52958 | 289.63 | 14.06 | 16.08 | 15.38 | 15.04 | 2.71E-06 | 7.26E-07 | 2.10E-03 | 5.08E-02 | 2.55E-01 | 4.12E-02 | 8.13E-01 |
| 138.52966 | 102.26 | 18.76 | 16.15 | 16.48 | 16.46 | 2.61E-35 | 3.65E-14 | 3.83E-14 | 4.07E-14 | 3.29E-01 | 4.26E-01 | 9.99E-01 |
| 138.54139 | 29.94  | 17.34 | 19.18 | 20.42 | 19.66 | 7.53E-42 | 7.21E-14 | 3.65E-14 | 3.70E-14 | 1.11E-09 | 5.83E-02 | 5.57E-04 |
| 138.58138 | 110.97 | 16.71 | 16.71 | 16.85 | 16.36 | 2.28E-01 | 1.00E+00 | 9.27E-01 | 4.39E-01 | 9.27E-01 | 4.78E-01 | 1.73E-01 |
| 138.59954 | 60.86  | 18.54 | 19.50 | 19.71 | 19.03 | 1.51E-18 | 1.91E-12 | 7.49E-14 | 8.60E-04 | 3.47E-01 | 2.28E-03 | 2.22E-06 |
| 138.90643 | 49.57  | 16.54 | 15.51 | 15.59 | 16.11 | 7.07E-07 | 4.02E-06 | 2.15E-05 | 1.72E-01 | 9.78E-01 | 2.52E-02 | 6.68E-02 |
| 138.92718 | 104.08 | 17.22 | 14.44 | 15.42 | 14.70 | 3.07E-37 | 3.65E-14 | 7.37E-14 | 3.65E-14 | 4.32E-06 | 5.62E-01 | 1.77E-03 |
| 138.93541 | 103.07 | 17.55 | 15.08 | 16.08 | 15.25 | 4.97E-32 | 3.65E-14 | 6.74E-13 | 3.92E-14 | 2.87E-06 | 8.35E-01 | 2.14E-04 |
| 138.94688 | 57.2   | 16.93 | 13.37 | 15.12 | 13.29 | 4.50E-14 | 1.04E-11 | 9.18E-04 | 1.23E-11 | 2.28E-03 | 9.99E-01 | 1.77E-03 |
| 138.95894 | 261.77 | 20.63 | 15.77 | 15.32 | 17.29 | 4.38E-60 | 3.65E-14 | 3.65E-14 | 3.65E-14 | 2.90E-01 | 1.18E-07 | 4.98E-02 |
| 138.96416 | 86.9   | 17.05 | 20.16 | 20.63 | 19.53 | 2.61E-26 | 7.23E-14 | 4.14E-14 | 9.25E-13 | 4.47E-01 | 2.09E-01 | 4.14E-03 |
| 138.98009 | 266.39 | 18.95 | 15.78 | 15.04 | 17.13 | 3.79E-23 | 7.58E-14 | 5.70E-14 | 7.51E-06 | 1.79E-01 | 2.40E-03 | 4.00E-07 |
| 138.98011 | 145.83 | 18.06 | 15.30 | 14.56 | 16.99 | 5.14E-31 | 7.43E-14 | 3.65E-14 | 8.21E-04 | 3.98E-02 | 6.91E-08 | 8.37E-14 |
| 139.01353 | 86.36  | 17.13 | 12.12 | 12.62 | 13.99 | 3.98E-58 | 3.65E-14 | 3.65E-14 | 3.67E-14 | 1.77E-01 | 1.87E-11 | 7.69E-07 |
| 139.01787 | 271.45 | 20.03 | 17.66 | 17.13 | 18.27 | 5.39E-19 | 5.40E-13 | 7.52E-14 | 1.45E-07 | 3.13E-01 | 2.19E-01 | 1.99E-03 |
| 139.02828 | 89.22  | 16.58 | 16.68 | 17.03 | 16.94 | 1.43E-01 | 9.70E-01 | 1.62E-01 | 3.77E-01 | 3.93E-01 | 6.68E-01 | 9.79E-01 |
| 139.03446 | 82.64  | 16.82 | 18.16 | 18.04 | 17.90 | 1.09E-11 | 2.85E-10 | 6.35E-09 | 7.67E-07 | 9.34E-01 | 5.98E-01 | 9.06E-01 |

|           |        |       |       |       |       |          |          |          |          |          |          |          |
|-----------|--------|-------|-------|-------|-------|----------|----------|----------|----------|----------|----------|----------|
| 139.03894 | 275.12 | 17.69 | 19.54 | 20.12 | 18.94 | 3.77E-32 | 6.78E-14 | 3.65E-14 | 1.93E-10 | 7.63E-03 | 6.51E-03 | 3.82E-09 |
| 139.03913 | 27.73  | 16.41 | 15.91 | 16.13 | 16.32 | 1.47E-01 | 1.26E-01 | 5.96E-01 | 9.81E-01 | 7.83E-01 | 3.22E-01 | 8.53E-01 |
| 139.04309 | 30.42  | 15.30 | 15.38 | 16.43 | 16.01 | 3.73E-06 | 9.84E-01 | 1.38E-05 | 1.93E-02 | 1.28E-04 | 6.25E-02 | 3.21E-01 |
| 139.04644 | 40.16  | 18.32 | 15.20 | 15.59 | 16.19 | 1.70E-46 | 3.65E-14 | 3.65E-14 | 4.21E-14 | 1.41E-01 | 1.89E-06 | 7.97E-03 |
| 139.05015 | 288.41 | 17.44 | 17.91 | 17.77 | 16.95 | 2.78E-03 | 2.44E-01 | 5.59E-01 | 2.52E-01 | 9.43E-01 | 2.54E-03 | 1.39E-02 |
| 139.05833 | 170.46 | 16.87 | 17.77 | 16.61 | 17.60 | 1.58E-06 | 9.18E-04 | 6.74E-01 | 1.38E-02 | 1.46E-05 | 9.06E-01 | 4.31E-04 |
| 139.07532 | 288.75 | 18.18 | 16.96 | 17.03 | 16.99 | 2.69E-07 | 6.16E-06 | 1.84E-05 | 1.86E-05 | 9.92E-01 | 1.00E+00 | 9.99E-01 |
| 139.08659 | 280.64 | 17.64 | 15.89 | 15.90 | 16.15 | 1.41E-17 | 9.98E-14 | 9.94E-14 | 1.97E-10 | 1.00E+00 | 6.21E-01 | 6.61E-01 |
| 139.09627 | 208.69 | 16.15 | 11.92 | 13.18 | 13.41 | 9.83E-17 | 7.41E-14 | 1.34E-09 | 7.79E-08 | 3.54E-02 | 1.07E-02 | 9.59E-01 |
| 139.10123 | 61.33  | 16.24 | 15.57 | 15.69 | 15.40 | 1.26E-04 | 2.79E-03 | 1.74E-02 | 1.27E-04 | 9.38E-01 | 8.21E-01 | 4.75E-01 |
| 139.11169 | 286.81 | 19.36 | 17.57 | 17.53 | 17.82 | 1.92E-14 | 1.63E-11 | 4.14E-12 | 1.49E-08 | 9.99E-01 | 7.68E-01 | 6.75E-01 |
| 139.11171 | 24.85  | 18.04 | 17.15 | 17.10 | 16.94 | 7.88E-10 | 2.63E-06 | 5.13E-07 | 9.30E-09 | 9.93E-01 | 6.31E-01 | 7.85E-01 |
| 139.12301 | 164.45 | 15.90 | 15.80 | 15.37 | 15.74 | 9.08E-02 | 9.74E-01 | 7.11E-02 | 9.03E-01 | 2.10E-01 | 9.94E-01 | 3.58E-01 |
| 139.14815 | 202.68 | 16.13 | 14.07 | 14.48 | 14.44 | 4.55E-06 | 8.30E-06 | 4.76E-04 | 6.09E-04 | 7.70E-01 | 8.26E-01 | 1.00E+00 |
| 139.48749 | 91.54  | 16.26 | 18.79 | 19.28 | 18.39 | 2.81E-31 | 5.63E-14 | 3.65E-14 | 7.54E-14 | 1.65E-01 | 3.46E-01 | 1.55E-03 |
| 139.51213 | 79.04  | 18.13 | 15.90 | 16.15 | 16.47 | 1.23E-08 | 6.03E-08 | 1.37E-06 | 1.44E-04 | 9.16E-01 | 4.71E-01 | 8.42E-01 |
| 139.52691 | 98.41  | 20.73 | 15.90 | 17.42 | 17.08 | 2.62E-49 | 3.65E-14 | 3.65E-14 | 3.65E-14 | 7.51E-08 | 9.67E-05 | 5.47E-01 |
| 139.53106 | 100.79 | 23.64 | 20.74 | 22.29 | 21.50 | 2.48E-33 | 3.65E-14 | 5.48E-10 | 7.16E-14 | 5.29E-12 | 2.11E-03 | 1.22E-03 |
| 139.53974 | 86.45  | 15.51 | 15.52 | 15.84 | 15.64 | 1.81E-01 | 1.00E+00 | 1.91E-01 | 8.68E-01 | 2.37E-01 | 8.97E-01 | 6.68E-01 |
| 139.91472 | 40.39  | 15.52 | 16.45 | 15.86 | 17.06 | 6.58E-07 | 4.31E-03 | 5.99E-01 | 6.28E-07 | 1.49E-01 | 1.52E-01 | 2.25E-04 |
| 139.924   | 270.82 | 17.74 | 14.00 | 14.17 | 14.53 | 1.42E-25 | 6.49E-14 | 7.14E-14 | 7.38E-14 | 9.64E-01 | 4.71E-01 | 7.54E-01 |
| 139.92404 | 121.38 | 17.75 | 15.53 | 15.76 | 16.10 | 2.35E-13 | 4.97E-12 | 3.48E-10 | 6.06E-07 | 8.72E-01 | 2.56E-01 | 6.80E-01 |
| 139.9643  | 93.58  | 17.21 | 15.99 | 16.28 | 16.29 | 3.77E-05 | 3.33E-05 | 2.61E-03 | 4.36E-03 | 6.86E-01 | 6.93E-01 | 1.00E+00 |
| 139.98787 | 275.35 | 20.94 | 20.56 | 20.44 | 19.40 | 6.01E-02 | 9.02E-01 | 8.02E-01 | 3.67E-02 | 9.97E-01 | 2.01E-01 | 2.81E-01 |
| 140.01195 | 118.43 | 19.07 | 14.57 | 13.34 | 16.27 | 5.54E-24 | 7.57E-14 | 4.67E-14 | 9.69E-07 | 8.22E-02 | 8.89E-03 | 5.02E-07 |
| 140.01649 | 235.77 | 13.02 | 17.54 | 18.34 | 17.14 | 1.73E-31 | 5.50E-14 | 3.65E-14 | 7.39E-14 | 2.22E-01 | 7.91E-01 | 2.76E-02 |
| 140.02504 | 88.23  | 16.99 | 17.05 | 17.39 | 17.39 | 1.45E-01 | 9.93E-01 | 2.51E-01 | 2.88E-01 | 4.25E-01 | 4.63E-01 | 1.00E+00 |
| 140.02869 | 89.66  | 18.74 | 15.79 | 15.97 | 16.07 | 4.04E-39 | 3.65E-14 | 3.65E-14 | 3.67E-14 | 8.21E-01 | 5.84E-01 | 9.73E-01 |
| 140.03325 | 97.43  | 20.24 | 17.88 | 18.71 | 18.45 | 2.78E-41 | 3.65E-14 | 5.74E-14 | 3.72E-14 | 2.06E-07 | 9.69E-04 | 3.15E-01 |
| 140.04435 | 45.64  | 18.43 | 16.76 | 17.19 | 16.63 | 3.31E-20 | 7.36E-14 | 5.10E-10 | 7.54E-14 | 1.16E-01 | 8.97E-01 | 2.19E-02 |
| 140.06821 | 52.16  | 24.82 | 24.95 | 24.77 | 25.02 | 1.41E-01 | 6.89E-01 | 9.68E-01 | 3.18E-01 | 4.29E-01 | 9.25E-01 | 1.54E-01 |
| 140.0706  | 288.65 | 19.33 | 15.51 | 16.37 | 16.63 | 2.00E-11 | 3.20E-11 | 2.21E-07 | 5.81E-06 | 3.79E-01 | 1.89E-01 | 9.68E-01 |
| 140.07285 | 28.48  | 19.75 | 18.08 | 18.38 | 18.23 | 4.31E-14 | 2.25E-12 | 5.22E-09 | 4.84E-10 | 5.30E-01 | 9.03E-01 | 9.22E-01 |
| 140.07292 | 159.58 | 16.98 | 14.81 | 14.79 | 15.16 | 1.04E-25 | 6.81E-14 | 6.36E-14 | 7.80E-14 | 9.99E-01 | 3.87E-01 | 3.17E-01 |
| 140.08148 | 143.67 | 18.03 | 14.40 | 15.15 | 15.38 | 2.71E-56 | 3.65E-14 | 3.65E-14 | 3.65E-14 | 1.90E-04 | 1.35E-06 | 5.95E-01 |
| 140.10703 | 148.04 | 16.99 | 14.61 | 15.74 | 15.85 | 7.73E-29 | 3.65E-14 | 3.60E-11 | 4.57E-09 | 6.01E-09 | 7.95E-10 | 9.40E-01 |
| 140.11509 | 202.45 | 16.10 | 12.46 | 12.92 | 12.98 | 4.62E-16 | 1.21E-13 | 2.14E-11 | 2.16E-10 | 7.29E-01 | 6.70E-01 | 9.99E-01 |
| 140.11826 | 162.18 | 17.77 | 17.55 | 17.40 | 17.68 | 4.25E-01 | 7.71E-01 | 3.78E-01 | 9.81E-01 | 9.28E-01 | 9.49E-01 | 6.64E-01 |
| 140.464   | 268.06 | 18.35 | 14.41 | 14.79 | 15.76 | 1.95E-32 | 3.65E-14 | 3.81E-14 | 8.79E-14 | 5.95E-01 | 1.48E-04 | 1.10E-02 |
| 140.46401 | 119.44 | 17.97 | 14.11 | 14.71 | 14.22 | 5.31E-33 | 3.67E-14 | 6.03E-14 | 3.76E-14 | 2.12E-01 | 9.87E-01 | 4.03E-01 |
| 140.48186 | 106.56 | 17.72 | 20.92 | 20.26 | 19.49 | 3.84E-23 | 5.38E-14 | 7.49E-14 | 4.27E-08 | 1.12E-01 | 2.52E-05 | 5.44E-02 |
| 140.48625 | 88.37  | 15.17 | 15.26 | 15.41 | 15.30 | 7.20E-01 | 9.75E-01 | 6.56E-01 | 9.32E-01 | 8.94E-01 | 9.98E-01 | 9.58E-01 |
| 140.49531 | 92.76  | 13.85 | 17.31 | 18.00 | 16.12 | 6.12E-29 | 6.85E-14 | 3.67E-14 | 6.73E-10 | 1.75E-01 | 4.06E-03 | 8.14E-07 |
| 140.50603 | 60.25  | 17.50 | 13.56 | 12.60 | 15.68 | 1.04E-22 | 8.25E-14 | 6.56E-14 | 7.89E-04 | 1.77E-01 | 1.13E-04 | 5.65E-09 |
| 140.50981 | 85.95  | 17.32 | 12.31 | 12.58 | 13.60 | 2.85E-43 | 3.65E-14 | 3.65E-14 | 4.36E-14 | 8.36E-01 | 7.90E-04 | 1.19E-02 |
| 140.52217 | 98.79  | 17.45 | 14.57 | 15.25 | 15.30 | 7.66E-47 | 3.65E-14 | 3.65E-14 | 3.65E-14 | 2.46E-04 | 1.21E-04 | 9.89E-01 |
| 140.52893 | 79.23  | 16.57 | 13.26 | 15.18 | 15.06 | 2.89E-05 | 5.18E-06 | 1.42E-01 | 1.15E-01 | 2.34E-02 | 4.75E-02 | 9.98E-01 |
| 140.53315 | 87.34  | 17.39 | 16.15 | 16.19 | 16.46 | 2.28E-18 | 7.58E-14 | 8.17E-14 | 2.55E-09 | 9.86E-01 | 1.57E-01 | 2.85E-01 |
| 140.54344 | 87.28  | 21.20 | 22.66 | 22.90 | 22.83 | 3.60E-19 | 2.15E-12 | 7.57E-14 | 1.01E-13 | 5.97E-01 | 8.19E-01 | 9.87E-01 |
| 140.54752 | 86.51  | 16.31 | 18.17 | 18.39 | 18.06 | 2.53E-33 | 4.05E-14 | 3.65E-14 | 6.36E-14 | 5.26E-01 | 9.08E-01 | 1.89E-01 |
| 140.57024 | 25.98  | 16.55 | 17.98 | 15.65 | 15.59 | 1.85E-84 | 3.65E-14 | 4.25E-14 | 3.92E-14 | 3.65E-14 | 3.65E-14 | 9.06E-01 |
| 140.90347 | 49.75  | 16.02 | 14.59 | 14.76 | 15.23 | 3.19E-10 | 1.52E-09 | 8.43E-08 | 2.69E-03 | 8.66E-01 | 2.62E-02 | 1.58E-01 |
| 140.924   | 266.4  | 17.84 | 16.33 | 16.90 | 16.78 | 1.19E-15 | 7.44E-14 | 2.47E-07 | 1.74E-08 | 5.35E-03 | 5.51E-02 | 9.02E-01 |
| 140.9512  | 285.91 | 20.87 | 17.74 | 17.81 | 18.64 | 4.53E-17 | 9.21E-14 | 1.08E-13 | 7.76E-08 | 9.98E-01 | 9.83E-02 | 1.40E-01 |
| 140.95128 | 136.42 | 19.15 | 16.13 | 14.82 | 17.53 | 1.39E-42 | 3.90E-14 | 3.65E-14 | 1.17E-08 | 4.87E-06 | 2.08E-06 | 7.38E-14 |
| 140.96174 | 91.99  | 17.79 | 16.69 | 17.10 | 17.18 | 1.65E-15 | 7.29E-14 | 1.10E-07 | 9.10E-06 | 5.92E-03 | 7.94E-04 | 9.04E-01 |
| 140.97557 | 149.4  | 17.26 | 12.69 | 11.74 | 15.48 | 7.36E-41 | 3.65E-14 | 3.65E-14 | 9.76E-06 | 4.70E-02 | 1.10E-11 | 7.27E-14 |
| 140.98581 | 35.86  | 21.21 | 20.63 | 21.30 | 20.64 | 2.45E-04 | 1.36E-02 | 9.55E-01 | 1.99E-02 | 3.39E-03 | 1.00E+00 | 5.32E-03 |
| 140.99127 | 151.39 | 18.34 | 14.99 | 14.31 | 16.98 | 1.33E-44 | 3.65E-14 | 3.65E-14 | 6.10E-07 | 3.30E-02 | 1.18E-12 | 6.78E-14 |
| 140.99499 | 267.04 | 18.28 | 20.13 | 20.55 | 19.72 | 6.93E-47 | 3.65E-14 | 3.65E-14 | 5.43E-14 | 6.68E-03 | 1.05E-02 | 6.98E-09 |
| 141.0065  | 98.25  | 20.21 | 20.99 | 21.78 | 21.34 | 1.87E-15 | 8.84E-05 | 7.49E-14 | 1.20E-08 | 1.08E-04 | 2.37E-01 | 8.60E-02 |
| 141.01825 | 50.12  | 17.91 | 15.30 | 16.64 | 15.71 | 2.43E-23 | 5.74E-14 | 9.87E-07 | 7.39E-14 | 5.18E-07 | 3.69E-01 | 1.21E-03 |
| 141.0259  | 27.8   | 15.71 | 16.31 | 16.27 | 16.96 | 3.06E-03 | 2.36E-01 | 2.75E-01 | 9.43E-04 | 1.00E+00 | 2.18E-01 | 1.74E-01 |
| 141.0323  | 258.87 | 19.05 | 19.46 | 20.16 | 18.63 | 3.00E-14 | 8.60E-02 | 3.48E-09 | 9.04E-02 | 5.92E-04 | 6.08E-05 | 1.06E-13 |
| 141.04097 | 81.22  | 16.08 | 15.32 | 14.92 | 15.26 | 5.45E-03 | 1.04E-01 | 2.98E-03 | 7.98E-02 | 6.49E-01 | 9.98E-01 | 7.67E-01 |
| 141.04406 | 85.06  | 18.49 | 19.91 | 20.23 | 20.12 | 1.56E-18 | 2.34E-11 | 7.41E-14 | 2.02E-13 | 3.64E-01 | 7.49E-01 | 9.38E-01 |
| 141.0504  | 89.32  | 15.84 | 15.92 | 16.32 | 16.27 | 1.77E-01 | 9.89E-01 | 2.44E-01 | 3.71E-01 | 4.39E-01 | 5.84E-01 | 9.98E-01 |
| 141.05466 | 172.51 | 17.18 | 14.86 | 14.76 | 15.25 | 2.27E-26 | 6.67E-14 | 5.23E-14 | 8.23E-14 | 9.75E-01 | 3.20E-01 | 1.44E-01 |

|           |        |       |       |       |       |          |          |          |          |          |          |          |
|-----------|--------|-------|-------|-------|-------|----------|----------|----------|----------|----------|----------|----------|
| 141.05546 | 22.9   | 15.29 | 12.44 | 12.35 | 13.49 | 1.22E-23 | 7.26E-14 | 6.85E-14 | 1.14E-08 | 9.89E-01 | 2.99E-03 | 8.71E-04 |
| 141.06584 | 275.01 | 18.56 | 16.15 | 16.20 | 16.48 | 7.20E-18 | 8.87E-14 | 9.71E-14 | 6.33E-11 | 9.99E-01 | 6.85E-01 | 7.66E-01 |
| 141.07121 | 52.61  | 20.62 | 20.62 | 20.54 | 20.68 | 7.77E-01 | 1.00E+00 | 9.15E-01 | 9.72E-01 | 9.11E-01 | 9.80E-01 | 7.26E-01 |
| 141.08442 | 212.46 | 16.52 | 13.81 | 14.43 | 14.30 | 6.15E-33 | 3.65E-14 | 6.63E-14 | 6.07E-14 | 1.29E-02 | 8.95E-02 | 9.26E-01 |
| 141.09097 | 288.86 | 18.51 | 17.04 | 17.07 | 17.26 | 1.01E-10 | 6.84E-09 | 9.39E-09 | 2.06E-06 | 9.99E-01 | 7.99E-01 | 8.51E-01 |
| 141.10238 | 186.28 | 16.27 | 13.77 | 13.74 | 14.82 | 1.12E-39 | 3.65E-14 | 3.65E-14 | 1.62E-13 | 9.99E-01 | 1.35E-07 | 4.72E-08 |
| 141.12738 | 201.39 | 16.52 | 13.87 | 14.32 | 14.75 | 7.42E-33 | 3.65E-14 | 4.43E-14 | 7.45E-14 | 9.80E-02 | 1.20E-04 | 1.46E-01 |
| 141.48009 | 111.22 | 16.56 | 14.56 | 15.15 | 15.08 | 1.63E-13 | 2.65E-13 | 1.47E-07 | 1.01E-07 | 9.25E-02 | 1.92E-01 | 9.93E-01 |
| 141.49836 | 86.27  | 15.71 | 18.18 | 18.35 | 17.25 | 3.15E-36 | 3.65E-14 | 3.65E-14 | 3.25E-13 | 7.98E-01 | 2.78E-05 | 3.34E-07 |
| 141.52238 | 68.29  | 17.14 | 11.69 | 12.06 | 14.39 | 2.55E-41 | 3.65E-14 | 3.65E-14 | 3.30E-12 | 7.43E-01 | 3.39E-11 | 6.88E-09 |
| 141.52748 | 89.42  | 18.01 | 15.43 | 15.39 | 16.07 | 1.09E-26 | 5.72E-14 | 5.12E-14 | 3.44E-13 | 9.99E-01 | 4.86E-02 | 3.21E-02 |
| 141.52998 | 100.64 | 18.02 | 14.22 | 14.95 | 14.59 | 4.04E-18 | 7.41E-14 | 2.11E-11 | 7.14E-13 | 3.36E-01 | 8.41E-01 | 8.51E-01 |
| 141.53401 | 101.94 | 19.32 | 15.51 | 16.62 | 16.14 | 2.61E-44 | 3.65E-14 | 3.74E-14 | 3.65E-14 | 1.07E-05 | 3.83E-02 | 1.65E-01 |
| 141.54222 | 84.55  | 18.20 | 19.51 | 19.90 | 19.83 | 4.51E-17 | 1.76E-09 | 8.20E-14 | 5.19E-13 | 2.20E-01 | 4.34E-01 | 9.84E-01 |
| 141.54556 | 84.84  | 16.60 | 16.42 | 16.65 | 17.09 | 4.03E-03 | 7.24E-01 | 9.90E-01 | 3.42E-02 | 5.53E-01 | 1.97E-03 | 8.44E-02 |
| 141.56351 | 116.2  | 13.71 | 14.97 | 15.43 | 14.60 | 3.48E-07 | 2.23E-04 | 1.45E-07 | 2.15E-02 | 4.42E-01 | 6.52E-01 | 4.49E-02 |
| 141.92095 | 273.13 | 17.62 | 13.36 | 13.93 | 14.08 | 6.98E-25 | 5.76E-14 | 7.44E-14 | 7.54E-14 | 4.73E-01 | 2.95E-01 | 9.83E-01 |
| 141.92098 | 122.26 | 17.23 | 15.21 | 15.36 | 16.15 | 2.89E-08 | 1.64E-07 | 1.24E-06 | 1.60E-02 | 9.71E-01 | 5.67E-02 | 1.47E-01 |
| 141.95141 | 272.11 | 17.92 | 13.72 | 12.32 | 15.32 | 5.01E-22 | 2.25E-13 | 5.83E-14 | 9.73E-06 | 4.15E-02 | 1.92E-02 | 4.76E-07 |
| 141.95855 | 278.22 | 23.10 | 19.17 | 18.76 | 20.70 | 1.23E-38 | 3.65E-14 | 3.65E-14 | 2.99E-13 | 5.01E-01 | 6.24E-06 | 4.66E-09 |
| 141.9833  | 277.09 | 20.45 | 19.33 | 18.26 | 17.82 | 1.44E-06 | 1.11E-01 | 8.03E-05 | 3.39E-06 | 1.57E-01 | 2.38E-02 | 8.36E-01 |
| 141.98913 | 29.22  | 16.90 | 14.43 | 16.02 | 14.96 | 1.33E-21 | 7.01E-14 | 1.08E-03 | 3.70E-13 | 1.96E-09 | 1.52E-01 | 1.55E-04 |
| 142.0081  | 89.95  | 19.36 | 18.88 | 19.36 | 19.21 | 2.07E-01 | 2.22E-01 | 1.00E+00 | 9.35E-01 | 2.44E-01 | 6.01E-01 | 9.40E-01 |
| 142.02643 | 97.64  | 24.43 | 25.69 | 25.82 | 25.34 | 3.44E-26 | 7.16E-14 | 4.34E-14 | 2.60E-11 | 7.14E-01 | 3.29E-02 | 1.06E-03 |
| 142.03256 | 227.09 | 14.78 | 17.47 | 18.05 | 16.81 | 5.09E-19 | 4.32E-13 | 7.41E-14 | 8.70E-08 | 3.43E-01 | 2.42E-01 | 2.96E-01 |
| 142.03316 | 75.98  | 18.92 | 17.93 | 17.69 | 17.81 | 1.48E-09 | 6.68E-06 | 1.09E-08 | 8.29E-07 | 6.40E-01 | 9.47E-01 | 9.32E-01 |
| 142.0394  | 91.75  | 18.06 | 17.76 | 17.39 | 17.08 | 3.94E-02 | 8.21E-01 | 2.11E-01 | 3.18E-02 | 7.28E-01 | 2.52E-01 | 8.27E-01 |
| 142.04391 | 82.78  | 16.17 | 15.71 | 15.96 | 16.14 | 1.40E-01 | 1.36E-01 | 7.64E-01 | 9.99E-01 | 6.46E-01 | 2.21E-01 | 8.56E-01 |
| 142.04986 | 255.76 | 19.62 | 18.02 | 17.67 | 17.68 | 3.67E-10 | 4.66E-06 | 1.20E-08 | 4.66E-08 | 6.97E-01 | 7.39E-01 | 1.00E+00 |
| 142.06084 | 23.45  | 16.58 | 15.96 | 16.98 | 16.14 | 8.50E-06 | 1.46E-02 | 1.94E-01 | 1.58E-01 | 1.20E-05 | 8.41E-01 | 6.63E-04 |
| 142.06114 | 188.79 | 16.61 | 13.39 | 13.91 | 14.34 | 1.32E-41 | 3.65E-14 | 3.65E-14 | 5.27E-14 | 5.46E-02 | 5.46E-05 | 1.61E-01 |
| 142.06514 | 37.9   | 19.23 | 18.13 | 18.53 | 18.77 | 1.21E-15 | 7.43E-14 | 7.72E-08 | 1.32E-03 | 8.00E-03 | 6.46E-06 | 2.24E-01 |
| 142.0724  | 51.69  | 16.98 | 15.32 | 15.68 | 16.08 | 8.40E-15 | 8.75E-14 | 8.47E-10 | 6.40E-05 | 2.58E-01 | 1.47E-03 | 2.10E-01 |
| 142.07759 | 197.05 | 15.87 | 13.12 | 13.01 | 13.58 | 1.73E-12 | 6.51E-10 | 8.64E-11 | 5.88E-07 | 9.93E-01 | 7.14E-01 | 5.41E-01 |
| 142.07762 | 23.06  | 15.94 | 11.04 | 12.75 | 13.80 | 4.53E-17 | 7.43E-14 | 8.09E-09 | 3.43E-04 | 6.56E-03 | 3.85E-06 | 2.03E-01 |
| 142.08619 | 296.6  | 18.28 | 16.73 | 17.29 | 17.00 | 8.45E-05 | 7.62E-05 | 2.18E-02 | 2.21E-03 | 4.04E-01 | 8.87E-01 | 8.58E-01 |
| 142.08628 | 185.37 | 18.91 | 18.56 | 18.44 | 17.76 | 1.40E-03 | 5.97E-01 | 3.23E-01 | 4.69E-04 | 9.73E-01 | 3.59E-02 | 9.77E-02 |
| 142.12264 | 264.82 | 18.47 | 16.72 | 16.26 | 17.05 | 1.30E-18 | 3.22E-12 | 7.43E-14 | 3.06E-08 | 1.98E-01 | 5.31E-01 | 6.23E-03 |
| 142.4971  | 93.2   | 15.01 | 15.35 | 15.84 | 15.12 | 1.50E-02 | 5.76E-01 | 1.13E-02 | 9.77E-01 | 2.97E-01 | 8.49E-01 | 5.75E-02 |
| 142.50909 | 83.52  | 16.78 | 16.04 | 15.56 | 16.37 | 9.00E-04 | 7.05E-02 | 3.84E-04 | 5.43E-01 | 4.16E-01 | 7.35E-01 | 5.75E-02 |
| 142.52219 | 66.8   | 16.79 | 12.69 | 12.51 | 13.81 | 3.48E-20 | 7.54E-14 | 7.54E-14 | 4.20E-09 | 9.79E-01 | 8.84E-02 | 3.12E-02 |
| 142.54103 | 253.19 | 18.24 | 14.46 | 14.72 | 16.37 | 4.57E-29 | 3.85E-14 | 4.81E-14 | 1.00E-07 | 8.57E-01 | 1.59E-07 | 5.68E-06 |
| 142.54103 | 83.76  | 21.54 | 22.18 | 22.27 | 21.50 | 4.86E-02 | 2.41E-01 | 1.40E-01 | 9.99E-01 | 9.95E-01 | 2.34E-01 | 1.40E-01 |
| 142.54652 | 86.28  | 15.30 | 16.53 | 16.33 | 16.22 | 4.78E-09 | 1.50E-08 | 1.92E-06 | 5.44E-05 | 7.65E-01 | 4.57E-01 | 9.50E-01 |
| 142.54947 | 89.35  | 16.08 | 16.24 | 16.25 | 16.05 | 7.57E-01 | 8.96E-01 | 8.69E-01 | 9.99E-01 | 1.00E+00 | 8.62E-01 | 8.33E-01 |
| 142.94813 | 240.82 | 18.12 | 15.94 | 14.08 | 16.68 | 3.06E-19 | 3.73E-07 | 7.07E-14 | 2.07E-03 | 3.11E-05 | 2.84E-01 | 7.15E-09 |
| 142.96689 | 293.22 | 18.96 | 15.32 | 15.28 | 16.30 | 5.88E-19 | 7.63E-14 | 7.45E-14 | 7.37E-09 | 1.00E+00 | 1.09E-01 | 8.45E-02 |
| 142.98364 | 152.44 | 17.03 | 11.23 | 10.35 | 14.92 | 2.91E-47 | 3.65E-14 | 3.65E-14 | 1.88E-06 | 1.23E-01 | 7.43E-14 | 5.32E-14 |
| 142.98664 | 144.43 | 17.41 | 11.31 | 10.97 | 14.71 | 2.77E-54 | 3.65E-14 | 3.65E-14 | 2.09E-12 | 7.58E-01 | 7.47E-14 | 7.01E-14 |
| 142.99151 | 19.8   | 17.69 | 15.19 | 15.64 | 16.12 | 1.30E-40 | 3.65E-14 | 3.65E-14 | 7.41E-14 | 2.56E-02 | 2.50E-07 | 1.76E-02 |
| 143.00361 | 95.48  | 18.90 | 19.47 | 20.39 | 19.88 | 2.01E-13 | 1.14E-02 | 1.39E-13 | 2.02E-06 | 7.15E-06 | 1.37E-01 | 3.83E-02 |
| 143.006   | 236.35 | 16.41 | 16.13 | 16.02 | 16.13 | 5.24E-01 | 7.31E-01 | 4.80E-01 | 7.45E-01 | 9.81E-01 | 1.00E+00 | 9.83E-01 |
| 143.01901 | 84.18  | 16.18 | 16.69 | 16.81 | 16.80 | 6.18E-05 | 5.51E-03 | 2.18E-04 | 4.97E-04 | 8.47E-01 | 8.85E-01 | 1.00E+00 |
| 143.02346 | 95.26  | 16.74 | 16.44 | 16.44 | 16.25 | 3.26E-03 | 9.46E-02 | 8.53E-02 | 1.50E-03 | 1.00E+00 | 5.05E-01 | 5.10E-01 |
| 143.02978 | 97.03  | 18.69 | 19.96 | 20.19 | 19.43 | 9.03E-27 | 7.49E-14 | 3.87E-14 | 1.77E-07 | 2.94E-01 | 5.49E-04 | 1.97E-07 |
| 143.03391 | 199.23 | 21.76 | 19.67 | 19.76 | 19.97 | 3.32E-10 | 1.31E-08 | 4.21E-08 | 2.78E-06 | 9.93E-01 | 8.25E-01 | 9.30E-01 |
| 143.03962 | 299.31 | 18.36 | 17.03 | 16.02 | 17.60 | 1.58E-19 | 8.58E-08 | 7.25E-14 | 7.03E-03 | 1.14E-04 | 7.97E-02 | 1.15E-09 |
| 143.04255 | 93.59  | 16.10 | 14.92 | 14.81 | 15.03 | 1.73E-04 | 1.74E-03 | 3.87E-04 | 7.42E-03 | 9.85E-01 | 9.89E-01 | 9.10E-01 |
| 143.05026 | 87.83  | 20.36 | 22.44 | 22.74 | 22.25 | 2.70E-23 | 7.48E-14 | 6.49E-14 | 1.75E-13 | 5.50E-01 | 8.63E-01 | 1.64E-01 |
| 143.06336 | 109.86 | 16.07 | 14.90 | 16.07 | 16.03 | 4.85E-08 | 7.25E-07 | 1.00E+00 | 9.96E-01 | 1.58E-06 | 8.52E-06 | 9.98E-01 |
| 143.06953 | 26.59  | 16.61 | 12.57 | 12.84 | 13.82 | 5.14E-38 | 3.65E-14 | 3.65E-14 | 7.36E-14 | 7.75E-01 | 1.67E-04 | 4.74E-03 |
| 143.07027 | 283.19 | 17.21 | 15.53 | 15.40 | 15.63 | 1.67E-19 | 9.29E-14 | 7.54E-14 | 1.58E-12 | 9.17E-01 | 9.64E-01 | 6.82E-01 |
| 143.073   | 38.87  | 19.74 | 18.52 | 19.13 | 18.96 | 1.94E-25 | 3.72E-14 | 1.01E-08 | 1.93E-12 | 3.14E-08 | 1.91E-04 | 3.51E-01 |
| 143.0815  | 277.64 | 18.77 | 17.54 | 16.72 | 17.89 | 2.04E-11 | 4.52E-05 | 2.61E-12 | 9.29E-03 | 1.67E-02 | 5.94E-01 | 2.51E-04 |
| 143.08547 | 23.57  | 16.68 | 13.50 | 14.28 | 15.10 | 1.05E-39 | 3.65E-14 | 3.72E-14 | 8.71E-13 | 7.37E-04 | 1.69E-12 | 4.16E-04 |
| 143.08555 | 166.2  | 16.48 | 13.86 | 14.10 | 14.68 | 1.11E-42 | 3.65E-14 | 3.65E-14 | 6.36E-14 | 4.83E-01 | 1.86E-05 | 3.97E-03 |
| 143.09023 | 183.96 | 15.87 | 12.98 | 13.61 | 14.14 | 1.71E-20 | 7.14E-14 | 1.80E-13 | 3.33E-08 | 1.28E-01 | 6.54E-04 | 2.66E-01 |
| 143.10664 | 288.96 | 17.35 | 16.21 | 16.10 | 16.11 | 1.98E-12 | 1.73E-08 | 3.43E-10 | 2.03E-09 | 9.26E-01 | 9.52E-01 | 1.00E+00 |

|           |        |       |       |       |       |          |          |          |          |          |          |          |
|-----------|--------|-------|-------|-------|-------|----------|----------|----------|----------|----------|----------|----------|
| 143.11792 | 42.58  | 17.83 | 18.01 | 17.33 | 17.15 | 2.42E-06 | 7.15E-01 | 1.79E-02 | 7.19E-04 | 7.44E-04 | 1.85E-05 | 7.35E-01 |
| 143.5076  | 113.83 | 16.66 | 12.92 | 13.14 | 13.56 | 9.32E-15 | 1.45E-12 | 1.63E-11 | 9.42E-09 | 9.67E-01 | 5.85E-01 | 8.41E-01 |
| 143.5432  | 97.32  | 15.66 | 13.95 | 14.44 | 14.37 | 3.04E-03 | 2.24E-03 | 4.85E-02 | 4.29E-02 | 7.52E-01 | 8.40E-01 | 9.99E-01 |
| 143.55126 | 86.78  | 17.72 | 19.67 | 20.03 | 19.56 | 1.26E-25 | 7.45E-14 | 4.63E-14 | 7.63E-14 | 3.12E-01 | 9.49E-01 | 1.18E-01 |
| 143.57917 | 70.9   | 15.10 | 15.95 | 15.72 | 14.97 | 1.95E-02 | 7.16E-02 | 2.83E-01 | 9.84E-01 | 9.11E-01 | 4.18E-02 | 1.79E-01 |
| 143.91936 | 120.57 | 16.52 | 14.30 | 14.23 | 14.88 | 5.79E-12 | 8.84E-10 | 1.81E-10 | 1.51E-05 | 9.97E-01 | 3.42E-01 | 2.38E-01 |
| 143.9522  | 264.98 | 17.82 | 15.94 | 16.24 | 16.40 | 1.84E-18 | 7.52E-14 | 6.26E-13 | 3.49E-10 | 4.47E-01 | 1.25E-01 | 8.67E-01 |
| 143.95904 | 143.11 | 18.14 | 14.30 | 13.54 | 16.18 | 4.91E-57 | 3.65E-14 | 3.65E-14 | 7.98E-14 | 5.36E-03 | 3.58E-13 | 4.85E-14 |
| 143.9696  | 86.51  | 16.78 | 19.73 | 20.07 | 19.23 | 4.16E-30 | 5.14E-14 | 3.67E-14 | 7.49E-14 | 5.99E-01 | 2.72E-01 | 1.41E-02 |
| 143.98093 | 264.13 | 19.37 | 16.00 | 15.14 | 17.00 | 4.06E-22 | 8.12E-14 | 6.16E-14 | 8.14E-08 | 1.48E-01 | 7.60E-02 | 6.01E-05 |
| 143.98166 | 132.57 | 17.56 | 14.86 | 14.53 | 16.19 | 2.68E-12 | 4.15E-09 | 3.05E-11 | 9.12E-03 | 8.71E-01 | 1.53E-02 | 1.14E-03 |
| 143.98812 | 69.55  | 16.74 | 10.86 | 12.81 | 11.85 | 6.71E-20 | 7.43E-14 | 7.17E-10 | 2.69E-13 | 7.14E-03 | 3.80E-01 | 4.03E-01 |
| 143.99687 | 119.38 | 22.16 | 20.01 | 20.22 | 20.08 | 5.46E-26 | 6.61E-14 | 7.36E-14 | 7.19E-14 | 7.31E-01 | 9.86E-01 | 9.12E-01 |
| 144.00106 | 89.28  | 15.75 | 20.47 | 20.69 | 19.13 | 2.04E-49 | 3.65E-14 | 3.65E-14 | 4.03E-14 | 8.69E-01 | 5.15E-05 | 1.37E-06 |
| 144.00433 | 90.97  | 17.04 | 15.99 | 16.01 | 16.18 | 6.09E-09 | 1.41E-07 | 2.22E-07 | 4.20E-05 | 9.99E-01 | 7.43E-01 | 8.12E-01 |
| 144.007   | 90.12  | 14.63 | 12.73 | 15.71 | 15.45 | 4.70E-09 | 3.67E-04 | 8.78E-02 | 3.15E-01 | 1.15E-08 | 5.62E-07 | 9.48E-01 |
| 144.01143 | 189.4  | 16.25 | 14.97 | 14.72 | 15.58 | 3.16E-14 | 9.57E-10 | 2.47E-13 | 4.03E-03 | 5.50E-01 | 1.50E-02 | 1.31E-04 |
| 144.01146 | 64.65  | 17.13 | 16.89 | 16.63 | 16.42 | 3.35E-02 | 7.60E-01 | 1.70E-01 | 2.70E-02 | 7.30E-01 | 2.75E-01 | 8.50E-01 |
| 144.03073 | 97.5   | 17.15 | 18.43 | 18.53 | 17.96 | 9.24E-31 | 4.19E-14 | 3.67E-14 | 2.73E-11 | 7.69E-01 | 5.05E-04 | 7.86E-06 |
| 144.03722 | 294.23 | 16.88 | 15.89 | 15.59 | 15.67 | 4.60E-10 | 1.17E-05 | 5.05E-09 | 1.24E-07 | 4.80E-01 | 7.36E-01 | 9.83E-01 |
| 144.04143 | 75.52  | 15.46 | 16.92 | 16.79 | 16.80 | 2.07E-08 | 3.62E-07 | 3.43E-06 | 7.37E-06 | 9.60E-01 | 9.67E-01 | 1.00E+00 |
| 144.0445  | 39.03  | 17.20 | 15.00 | 15.57 | 15.92 | 1.08E-32 | 3.65E-14 | 6.65E-14 | 2.76E-13 | 1.70E-03 | 2.76E-07 | 1.48E-01 |
| 144.04834 | 67.54  | 19.30 | 19.82 | 20.05 | 20.08 | 1.44E-10 | 1.21E-04 | 7.66E-09 | 4.61E-09 | 2.38E-01 | 1.48E-01 | 9.90E-01 |
| 144.05233 | 87.06  | 15.93 | 16.10 | 16.58 | 16.44 | 1.10E-04 | 6.94E-01 | 1.77E-04 | 8.00E-03 | 1.35E-02 | 1.60E-01 | 8.20E-01 |
| 144.06313 | 52.89  | 17.82 | 13.71 | 13.48 | 15.15 | 5.93E-37 | 3.65E-14 | 3.65E-14 | 8.54E-14 | 8.74E-01 | 6.51E-05 | 1.89E-06 |
| 144.06548 | 276.26 | 21.83 | 20.96 | 20.86 | 21.06 | 2.37E-03 | 1.20E-02 | 3.48E-03 | 4.11E-02 | 9.87E-01 | 9.87E-01 | 9.08E-01 |
| 144.07117 | 87.75  | 15.82 | 15.77 | 16.49 | 15.82 | 1.51E-02 | 9.97E-01 | 3.72E-02 | 1.00E+00 | 2.69E-02 | 9.98E-01 | 5.44E-02 |
| 144.07507 | 278.83 | 17.13 | 15.88 | 16.10 | 15.66 | 1.01E-12 | 2.56E-09 | 1.03E-06 | 1.24E-11 | 6.52E-01 | 7.20E-01 | 1.29E-01 |
| 144.07576 | 25.06  | 16.48 | 12.94 | 13.79 | 14.09 | 7.23E-38 | 3.65E-14 | 3.87E-14 | 7.16E-14 | 1.85E-03 | 1.64E-05 | 5.69E-01 |
| 144.08081 | 46.36  | 22.50 | 21.60 | 22.03 | 21.90 | 5.97E-17 | 7.54E-14 | 4.67E-06 | 9.55E-09 | 7.51E-05 | 1.73E-02 | 5.25E-01 |
| 144.08418 | 200.32 | 16.24 | 13.88 | 14.52 | 14.29 | 3.92E-36 | 3.65E-14 | 6.36E-14 | 3.94E-14 | 7.18E-04 | 8.18E-02 | 5.02E-01 |
| 144.10197 | 154.84 | 18.83 | 21.27 | 20.24 | 20.90 | 9.62E-14 | 4.06E-13 | 2.72E-05 | 1.50E-09 | 6.11E-03 | 6.52E-01 | 1.73E-01 |
| 144.13832 | 267.13 | 16.91 | 15.48 | 15.45 | 15.97 | 2.26E-18 | 7.78E-14 | 7.47E-14 | 3.83E-07 | 9.98E-01 | 2.67E-02 | 1.49E-02 |
| 144.4549  | 116.57 | 16.28 | 11.53 | 13.70 | 13.27 | 3.40E-18 | 7.49E-14 | 4.82E-07 | 1.35E-08 | 6.44E-05 | 3.11E-03 | 8.26E-01 |
| 144.50148 | 86.92  | 12.52 | 16.66 | 16.86 | 15.54 | 5.44E-41 | 3.65E-14 | 3.65E-14 | 7.12E-14 | 9.03E-01 | 1.28E-03 | 7.98E-05 |
| 144.51598 | 66.73  | 16.64 | 14.00 | 16.12 | 15.22 | 3.21E-12 | 3.78E-12 | 4.42E-01 | 4.82E-04 | 4.28E-08 | 5.43E-03 | 6.16E-02 |
| 144.52943 | 94.21  | 15.06 | 14.55 | 14.91 | 13.84 | 4.44E-05 | 2.02E-01 | 9.39E-01 | 3.66E-05 | 5.22E-01 | 4.52E-02 | 5.33E-04 |
| 144.53755 | 101.26 | 16.31 | 15.20 | 15.00 | 14.59 | 2.94E-04 | 3.07E-02 | 6.09E-03 | 2.34E-04 | 9.61E-01 | 4.72E-01 | 7.61E-01 |
| 144.54199 | 94.58  | 16.35 | 14.15 | 13.90 | 14.14 | 5.08E-08 | 9.84E-06 | 5.10E-07 | 1.45E-05 | 9.46E-01 | 1.00E+00 | 9.60E-01 |
| 144.55159 | 90.66  | 18.54 | 21.27 | 21.19 | 20.57 | 1.02E-24 | 6.63E-14 | 6.98E-14 | 1.94E-12 | 9.92E-01 | 5.09E-02 | 9.41E-02 |
| 144.5671  | 24.54  | 14.44 | 15.95 | 14.79 | 17.40 | 7.03E-15 | 1.02E-04 | 7.26E-01 | 1.17E-13 | 6.52E-03 | 5.80E-04 | 5.72E-11 |
| 144.95691 | 25.54  | 19.25 | 19.10 | 19.81 | 19.06 | 1.88E-06 | 7.08E-01 | 8.41E-04 | 5.69E-01 | 1.88E-05 | 9.95E-01 | 1.06E-05 |
| 144.9704  | 87.82  | 15.63 | 15.90 | 16.01 | 15.77 | 1.49E-01 | 4.01E-01 | 1.19E-01 | 8.62E-01 | 9.23E-01 | 8.90E-01 | 5.40E-01 |
| 144.98209 | 21.8   | 23.12 | 22.22 | 22.59 | 22.71 | 4.74E-15 | 7.41E-14 | 9.04E-07 | 4.70E-04 | 2.14E-03 | 3.03E-05 | 6.31E-01 |
| 144.98214 | 209.07 | 23.34 | 24.49 | 24.11 | 23.60 | 3.30E-03 | 2.99E-03 | 8.65E-02 | 8.68E-01 | 6.65E-01 | 5.23E-02 | 4.51E-01 |
| 144.99203 | 277.33 | 19.37 | 16.13 | 16.46 | 16.76 | 6.65E-36 | 3.65E-14 | 3.67E-14 | 5.78E-14 | 5.00E-01 | 5.06E-02 | 6.03E-01 |
| 144.99209 | 33.91  | 18.74 | 20.72 | 21.94 | 20.93 | 1.35E-56 | 3.65E-14 | 3.65E-14 | 3.65E-14 | 1.77E-13 | 5.05E-01 | 1.64E-09 |
| 144.99546 | 83.79  | 19.19 | 19.14 | 19.68 | 19.28 | 9.08E-02 | 9.96E-01 | 1.37E-01 | 9.80E-01 | 9.84E-02 | 9.36E-01 | 3.46E-01 |
| 145.00005 | 90.19  | 17.99 | 17.59 | 18.24 | 17.82 | 3.71E-02 | 2.67E-01 | 6.69E-01 | 8.65E-01 | 2.29E-02 | 7.69E-01 | 2.63E-01 |
| 145.01634 | 114.56 | 15.67 | 18.83 | 19.16 | 17.66 | 6.05E-35 | 3.67E-14 | 3.65E-14 | 1.58E-12 | 5.78E-01 | 8.35E-05 | 2.02E-07 |
| 145.02148 | 95.72  | 15.76 | 13.88 | 13.69 | 14.38 | 1.55E-04 | 1.23E-03 | 2.39E-04 | 3.67E-02 | 9.82E-01 | 7.89E-01 | 5.61E-01 |
| 145.02837 | 27.82  | 15.91 | 17.39 | 17.76 | 18.36 | 7.03E-15 | 1.84E-06 | 1.08E-09 | 8.76E-14 | 5.54E-01 | 6.09E-03 | 1.74E-01 |
| 145.03519 | 300.39 | 20.27 | 19.85 | 19.17 | 20.06 | 1.72E-04 | 3.28E-01 | 8.81E-05 | 8.49E-01 | 4.55E-02 | 8.47E-01 | 4.67E-03 |
| 145.04385 | 90.61  | 19.44 | 19.22 | 18.87 | 18.83 | 1.42E-01 | 8.89E-01 | 2.26E-01 | 1.90E-01 | 6.62E-01 | 5.89E-01 | 9.99E-01 |
| 145.04947 | 284.61 | 23.08 | 22.49 | 22.31 | 22.07 | 6.83E-03 | 1.87E-01 | 4.33E-02 | 5.08E-03 | 9.34E-01 | 5.28E-01 | 8.60E-01 |
| 145.05332 | 88.13  | 15.80 | 16.19 | 16.08 | 16.04 | 3.31E-01 | 2.78E-01 | 5.51E-01 | 7.14E-01 | 9.64E-01 | 9.09E-01 | 9.97E-01 |
| 145.0608  | 215.27 | 16.62 | 15.81 | 15.98 | 16.69 | 2.23E-08 | 6.26E-06 | 4.67E-04 | 9.76E-01 | 7.39E-01 | 3.48E-06 | 2.28E-04 |
| 145.06483 | 184.84 | 16.38 | 14.07 | 14.38 | 14.78 | 7.12E-39 | 3.65E-14 | 3.65E-14 | 7.17E-14 | 1.85E-01 | 7.55E-05 | 5.75E-02 |
| 145.06884 | 266.74 | 18.09 | 16.21 | 16.08 | 16.00 | 2.96E-18 | 1.55E-12 | 1.05E-13 | 9.91E-14 | 9.51E-01 | 8.40E-01 | 9.89E-01 |
| 145.07607 | 196.96 | 16.37 | 13.64 | 13.53 | 13.52 | 9.86E-17 | 3.60E-12 | 4.22E-13 | 1.78E-12 | 9.91E-01 | 9.90E-01 | 1.00E+00 |
| 145.08417 | 39.29  | 19.13 | 17.78 | 18.26 | 18.24 | 7.03E-30 | 3.65E-14 | 7.46E-14 | 7.56E-14 | 3.24E-05 | 1.42E-04 | 9.97E-01 |
| 145.08742 | 163.12 | 16.50 | 14.21 | 14.86 | 14.64 | 1.22E-27 | 3.72E-14 | 7.61E-14 | 7.49E-14 | 3.92E-03 | 1.31E-01 | 6.60E-01 |
| 145.09712 | 257.29 | 18.81 | 18.35 | 19.40 | 18.27 | 2.31E-04 | 3.32E-01 | 1.23E-01 | 2.09E-01 | 1.12E-03 | 9.91E-01 | 5.09E-04 |
| 145.1011  | 23.95  | 18.53 | 16.02 | 16.84 | 17.59 | 7.84E-31 | 3.65E-14 | 7.51E-14 | 5.70E-06 | 1.02E-04 | 2.39E-13 | 6.41E-04 |
| 145.10117 | 283.8  | 17.14 | 15.86 | 16.08 | 15.90 | 1.30E-07 | 1.52E-06 | 7.64E-05 | 5.97E-06 | 8.15E-01 | 9.99E-01 | 8.93E-01 |
| 145.10122 | 161    | 17.97 | 15.73 | 16.05 | 16.39 | 4.77E-27 | 3.92E-14 | 7.05E-14 | 1.86E-13 | 3.21E-01 | 5.06E-03 | 3.15E-01 |
| 145.10535 | 60     | 20.76 | 20.44 | 20.41 | 20.17 | 9.93E-05 | 5.22E-02 | 2.38E-02 | 2.71E-05 | 9.94E-01 | 1.48E-01 | 2.33E-01 |
| 145.49674 | 38.11  | 14.37 | 13.96 | 17.78 | 17.08 | 4.94E-18 | 8.01E-01 | 3.38E-12 | 8.93E-08 | 1.38E-13 | 2.28E-09 | 4.48E-01 |

|           |        |       |       |       |       |          |          |          |          |          |          |          |
|-----------|--------|-------|-------|-------|-------|----------|----------|----------|----------|----------|----------|----------|
| 145.51282 | 258.52 | 17.91 | 16.00 | 16.45 | 17.42 | 6.32E-23 | 6.78E-14 | 1.90E-13 | 4.27E-02 | 6.89E-02 | 9.85E-12 | 3.40E-06 |
| 145.51788 | 86.22  | 12.41 | 15.56 | 15.71 | 14.56 | 5.63E-21 | 7.55E-14 | 7.54E-14 | 1.54E-08 | 9.72E-01 | 2.85E-02 | 7.34E-03 |
| 145.5504  | 87.92  | 14.50 | 17.86 | 17.84 | 17.10 | 1.64E-19 | 7.42E-14 | 7.46E-14 | 4.09E-10 | 1.00E+00 | 2.12E-01 | 2.24E-01 |
| 145.55672 | 24.71  | 15.13 | 15.98 | 15.56 | 16.99 | 6.62E-06 | 7.36E-02 | 5.98E-01 | 2.42E-06 | 6.45E-01 | 3.13E-02 | 6.54E-04 |
| 145.96716 | 87.16  | 13.06 | 16.00 | 16.15 | 15.46 | 7.66E-21 | 7.33E-14 | 7.58E-14 | 3.23E-11 | 9.63E-01 | 3.86E-01 | 1.65E-01 |
| 145.98015 | 130.94 | 16.98 | 12.42 | 14.08 | 14.14 | 1.33E-26 | 3.67E-14 | 2.09E-13 | 2.44E-12 | 5.92E-05 | 5.41E-05 | 9.98E-01 |
| 145.98553 | 178.73 | 17.91 | 17.22 | 17.50 | 17.22 | 2.77E-02 | 3.96E-02 | 3.72E-01 | 4.97E-02 | 7.20E-01 | 1.00E+00 | 7.45E-01 |
| 145.99332 | 118.81 | 15.62 | 14.41 | 11.86 | 13.95 | 2.87E-16 | 1.49E-02 | 7.34E-14 | 3.84E-04 | 1.53E-08 | 6.96E-01 | 8.28E-06 |
| 145.99914 | 94.71  | 15.88 | 15.92 | 15.56 | 15.04 | 1.18E-01 | 9.99E-01 | 8.33E-01 | 1.49E-01 | 7.83E-01 | 1.32E-01 | 5.77E-01 |
| 146.00641 | 131.16 | 15.32 | 14.19 | 14.57 | 14.90 | 3.75E-02 | 2.38E-02 | 2.31E-01 | 7.26E-01 | 7.75E-01 | 3.30E-01 | 8.65E-01 |
| 146.01198 | 85.17  | 17.11 | 18.07 | 17.69 | 17.80 | 1.83E-05 | 7.76E-06 | 1.48E-02 | 3.26E-03 | 2.17E-01 | 5.53E-01 | 9.44E-01 |
| 146.01574 | 86.68  | 15.31 | 15.98 | 15.91 | 15.34 | 6.35E-05 | 1.05E-03 | 3.95E-03 | 9.98E-01 | 9.79E-01 | 4.27E-03 | 1.35E-02 |
| 146.01922 | 300.76 | 17.49 | 15.65 | 14.88 | 16.24 | 1.90E-22 | 8.50E-13 | 5.12E-14 | 2.77E-06 | 8.25E-03 | 7.50E-02 | 4.21E-07 |
| 146.02708 | 46.13  | 21.76 | 22.47 | 22.20 | 21.71 | 6.74E-03 | 1.89E-02 | 2.49E-01 | 9.97E-01 | 7.07E-01 | 1.75E-02 | 2.13E-01 |
| 146.02998 | 93.96  | 14.87 | 15.35 | 15.66 | 16.02 | 1.97E-02 | 5.46E-01 | 1.28E-01 | 1.28E-02 | 8.42E-01 | 3.15E-01 | 7.90E-01 |
| 146.02999 | 30.02  | 16.31 | 18.57 | 18.61 | 18.79 | 3.34E-32 | 4.59E-14 | 4.12E-14 | 3.74E-14 | 9.98E-01 | 7.27E-01 | 8.23E-01 |
| 146.03519 | 36.9   | 14.14 | 16.84 | 16.90 | 12.42 | 3.11E-21 | 5.75E-08 | 2.18E-08 | 1.47E-03 | 9.99E-01 | 7.38E-14 | 7.51E-14 |
| 146.03857 | 297.68 | 15.76 | 13.17 | 11.87 | 13.97 | 2.05E-30 | 7.25E-14 | 3.65E-14 | 1.88E-08 | 7.13E-05 | 3.76E-02 | 1.09E-10 |
| 146.04487 | 98.26  | 16.33 | 15.43 | 15.41 | 15.41 | 3.87E-04 | 3.06E-03 | 2.16E-03 | 3.08E-03 | 1.00E+00 | 1.00E+00 | 1.00E+00 |
| 146.05287 | 288.31 | 17.98 | 17.29 | 17.16 | 16.64 | 1.56E-07 | 7.61E-03 | 9.25E-04 | 3.18E-08 | 9.45E-01 | 2.56E-02 | 9.68E-02 |
| 146.05291 | 30.32  | 17.68 | 16.98 | 16.54 | 16.79 | 8.10E-17 | 2.94E-07 | 7.39E-14 | 1.94E-10 | 3.39E-03 | 4.77E-01 | 2.14E-01 |
| 146.05999 | 284.11 | 20.19 | 18.79 | 18.76 | 18.93 | 5.20E-06 | 7.10E-05 | 3.94E-05 | 6.77E-04 | 1.00E+00 | 9.73E-01 | 9.54E-01 |
| 146.06011 | 48.62  | 21.95 | 21.26 | 21.47 | 21.48 | 2.95E-11 | 1.45E-11 | 2.89E-06 | 1.04E-05 | 1.17E-01 | 1.13E-01 | 1.00E+00 |
| 146.06864 | 119.7  | 16.81 | 17.40 | 18.05 | 17.17 | 1.04E-05 | 7.06E-02 | 2.86E-06 | 4.73E-01 | 4.56E-02 | 7.97E-01 | 3.33E-03 |
| 146.07232 | 183.24 | 17.44 | 14.73 | 14.74 | 15.21 | 7.02E-36 | 3.65E-14 | 3.65E-14 | 6.49E-14 | 1.00E+00 | 1.11E-01 | 1.22E-01 |
| 146.10056 | 137.87 | 14.12 | 13.43 | 14.06 | 13.92 | 2.35E-01 | 2.22E-01 | 9.98E-01 | 9.51E-01 | 3.20E-01 | 5.64E-01 | 9.84E-01 |
| 146.10565 | 45.66  | 16.17 | 15.32 | 14.17 | 15.51 | 1.66E-03 | 3.44E-01 | 5.56E-04 | 5.83E-01 | 1.23E-01 | 9.86E-01 | 6.18E-02 |
| 146.1176  | 44.57  | 23.82 | 24.26 | 24.22 | 23.84 | 5.30E-06 | 1.78E-04 | 8.54E-04 | 9.95E-01 | 9.74E-01 | 1.13E-03 | 4.37E-03 |
| 146.16527 | 80.04  | 18.58 | 23.33 | 20.19 | 23.07 | 1.38E-28 | 4.32E-14 | 5.45E-04 | 6.45E-14 | 7.74E-12 | 9.33E-01 | 8.03E-10 |
| 146.49846 | 174.58 | 15.22 | 15.30 | 16.35 | 15.14 | 4.96E-02 | 9.98E-01 | 8.25E-02 | 9.98E-01 | 1.44E-01 | 9.88E-01 | 7.67E-02 |
| 146.52465 | 255.17 | 16.30 | 12.55 | 19.14 | 15.13 | 2.32E-16 | 5.06E-07 | 2.06E-04 | 3.34E-01 | 7.25E-14 | 2.21E-03 | 3.23E-07 |
| 146.53897 | 44.66  | 14.76 | 14.21 | 16.07 | 13.20 | 3.91E-04 | 8.19E-01 | 1.64E-01 | 7.97E-02 | 2.39E-02 | 4.37E-01 | 1.46E-04 |
| 146.57031 | 118.94 | 14.71 | 14.25 | 14.49 | 14.04 | 9.45E-02 | 3.19E-01 | 8.38E-01 | 7.71E-02 | 8.22E-01 | 8.88E-01 | 3.95E-01 |
| 146.95762 | 121.62 | 17.66 | 13.85 | 15.33 | 14.59 | 1.43E-29 | 3.65E-14 | 2.89E-13 | 7.17E-14 | 8.40E-06 | 8.13E-02 | 7.57E-02 |
| 146.96132 | 288.88 | 18.43 | 15.15 | 14.46 | 16.26 | 2.98E-16 | 3.16E-11 | 7.54E-14 | 2.76E-05 | 4.27E-01 | 9.25E-02 | 9.14E-04 |
| 146.97498 | 284.78 | 15.03 | 15.49 | 16.09 | 14.65 | 7.32E-03 | 6.76E-01 | 4.76E-02 | 8.12E-01 | 4.85E-01 | 2.23E-01 | 5.63E-03 |
| 146.98031 | 199.24 | 21.91 | 23.29 | 23.34 | 22.78 | 1.64E-07 | 3.05E-06 | 9.32E-07 | 8.81E-03 | 9.98E-01 | 2.78E-01 | 1.93E-01 |
| 146.98739 | 123.53 | 15.08 | 14.16 | 14.22 | 14.70 | 2.36E-01 | 2.70E-01 | 3.23E-01 | 8.84E-01 | 9.99E-01 | 7.49E-01 | 8.08E-01 |
| 147.01834 | 36.4   | 15.94 | 16.10 | 17.54 | 15.89 | 3.83E-06 | 9.62E-01 | 2.41E-05 | 9.99E-01 | 3.41E-04 | 9.37E-01 | 4.50E-05 |
| 147.02238 | 58.48  | 17.52 | 16.34 | 16.30 | 17.20 | 2.13E-08 | 3.03E-06 | 1.01E-06 | 5.28E-01 | 9.98E-01 | 2.43E-03 | 1.18E-03 |
| 147.02514 | 30.33  | 13.91 | 14.07 | 14.96 | 13.77 | 7.98E-03 | 9.70E-01 | 1.99E-02 | 9.83E-01 | 8.20E-02 | 8.63E-01 | 1.10E-02 |
| 147.02615 | 192.66 | 13.75 | 15.34 | 15.87 | 16.45 | 3.62E-07 | 4.83E-03 | 5.29E-05 | 3.96E-07 | 6.88E-01 | 1.18E-01 | 6.43E-01 |
| 147.03074 | 299.37 | 20.02 | 19.18 | 18.67 | 19.93 | 4.39E-05 | 3.87E-02 | 1.11E-04 | 9.92E-01 | 3.77E-01 | 1.11E-01 | 9.03E-04 |
| 147.04409 | 60.2   | 21.64 | 20.90 | 21.32 | 20.87 | 7.70E-16 | 1.41E-12 | 3.98E-03 | 5.39E-13 | 1.43E-04 | 9.84E-01 | 4.83E-05 |
| 147.0476  | 28.86  | 15.77 | 14.63 | 14.26 | 14.16 | 6.12E-04 | 3.87E-02 | 2.17E-03 | 1.56E-03 | 8.23E-01 | 7.22E-01 | 9.97E-01 |
| 147.05521 | 174.94 | 16.84 | 14.63 | 14.46 | 14.44 | 9.17E-26 | 7.58E-14 | 7.05E-14 | 7.28E-14 | 8.85E-01 | 8.70E-01 | 1.00E+00 |
| 147.06502 | 286.08 | 17.87 | 16.83 | 17.10 | 16.94 | 4.07E-06 | 1.01E-05 | 1.50E-03 | 1.47E-04 | 6.18E-01 | 9.65E-01 | 8.93E-01 |
| 147.0765  | 152.81 | 19.37 | 24.95 | 21.86 | 24.63 | 1.13E-37 | 3.65E-14 | 2.48E-09 | 3.65E-14 | 1.17E-12 | 8.56E-01 | 4.34E-10 |
| 147.08044 | 202.41 | 17.59 | 14.82 | 15.29 | 15.25 | 4.01E-30 | 3.65E-14 | 3.65E-14 | 5.05E-14 | 4.22E-06 | 8.18E-14 | 1.34E-03 |
| 147.08044 | 21.52  | 16.65 | 12.88 | 13.83 | 14.54 | 1.99E-53 | 3.67E-14 | 6.92E-14 | 7.16E-14 | 1.49E-01 | 2.47E-01 | 9.97E-01 |
| 147.08447 | 291.64 | 17.87 | 17.97 | 17.75 | 18.26 | 4.81E-01 | 9.87E-01 | 9.83E-01 | 6.23E-01 | 9.04E-01 | 8.29E-01 | 4.24E-01 |
| 147.0917  | 201.92 | 15.53 | 11.38 | 12.20 | 11.89 | 4.17E-17 | 7.78E-14 | 8.41E-11 | 8.73E-12 | 3.30E-01 | 7.32E-01 | 9.28E-01 |
| 147.11271 | 77.44  | 23.69 | 24.82 | 24.90 | 24.69 | 1.52E-06 | 4.39E-05 | 7.20E-06 | 5.32E-04 | 9.86E-01 | 9.65E-01 | 8.47E-01 |
| 147.11674 | 23.86  | 18.25 | 15.41 | 16.21 | 17.00 | 1.07E-47 | 3.65E-14 | 3.65E-14 | 2.99E-13 | 2.55E-06 | 7.38E-14 | 5.10E-06 |
| 147.11681 | 297.21 | 17.15 | 16.63 | 16.64 | 16.54 | 1.34E-01 | 2.67E-01 | 2.67E-01 | 1.59E-01 | 1.00E+00 | 9.90E-01 | 9.88E-01 |
| 147.12094 | 124.15 | 13.24 | 15.75 | 13.24 | 15.16 | 9.30E-09 | 1.01E-06 | 1.00E+00 | 4.42E-04 | 1.89E-06 | 6.31E-01 | 6.28E-04 |
| 147.16224 | 29.22  | 14.82 | 14.72 | 12.73 | 15.54 | 1.10E-16 | 9.83E-01 | 5.16E-11 | 8.65E-02 | 1.60E-09 | 4.39E-02 | 7.53E-14 |
| 147.16849 | 281.85 | 15.26 | 16.16 | 16.07 | 15.92 | 1.02E-02 | 1.33E-02 | 2.87E-02 | 1.27E-01 | 9.92E-01 | 8.75E-01 | 9.62E-01 |
| 147.16853 | 80.79  | 14.22 | 18.97 | 15.93 | 18.88 | 9.56E-23 | 7.34E-14 | 2.09E-03 | 7.25E-14 | 1.76E-08 | 9.98E-01 | 9.36E-08 |
| 147.47625 | 122.51 | 15.60 | 14.76 | 15.91 | 15.03 | 6.40E-05 | 6.57E-03 | 6.21E-01 | 1.36E-01 | 1.10E-04 | 7.50E-01 | 7.05E-03 |
| 147.49821 | 30.66  | 15.00 | 12.29 | 16.41 | 15.29 | 3.93E-29 | 7.36E-14 | 2.17E-05 | 7.78E-01 | 3.65E-14 | 7.45E-14 | 2.61E-03 |
| 147.51488 | 156.57 | 14.40 | 15.03 | 15.42 | 14.39 | 5.44E-02 | 4.61E-01 | 8.20E-02 | 1.00E+00 | 8.14E-01 | 4.95E-01 | 1.06E-01 |
| 147.52256 | 193.51 | 15.36 | 15.20 | 15.77 | 16.33 | 1.43E-04 | 9.30E-01 | 3.44E-01 | 1.10E-03 | 1.25E-01 | 1.84E-04 | 1.45E-01 |
| 147.52854 | 70.87  | 16.77 | 14.91 | 15.47 | 15.88 | 6.69E-05 | 2.77E-05 | 6.03E-03 | 1.32E-01 | 5.10E-01 | 9.68E-02 | 7.57E-01 |
| 147.5337  | 73.97  | 16.14 | 16.55 | 16.42 | 16.47 | 5.80E-01 | 5.53E-01 | 8.05E-01 | 7.26E-01 | 9.76E-01 | 9.95E-01 | 9.98E-01 |
| 147.54664 | 29.64  | 15.52 | 17.04 | 16.92 | 17.45 | 1.85E-13 | 8.49E-09 | 8.20E-08 | 1.11E-12 | 9.66E-01 | 3.57E-01 | 1.52E-01 |
| 147.69054 | 32.38  | 15.67 | 11.57 | 13.27 | 14.11 | 4.63E-23 | 4.25E-14 | 3.23E-10 | 1.30E-04 | 2.36E-05 | 4.82E-10 | 1.07E-01 |
| 147.95616 | 115.79 | 15.99 | 9.42  | 12.03 | 11.35 | 1.02E-29 | 3.65E-14 | 1.68E-13 | 7.26E-14 | 2.01E-06 | 1.24E-03 | 5.37E-01 |

|           |        |       |       |       |       |          |          |          |          |          |          |          |
|-----------|--------|-------|-------|-------|-------|----------|----------|----------|----------|----------|----------|----------|
| 147.97405 | 114.56 | 15.30 | 12.56 | 14.73 | 13.87 | 8.43E-07 | 5.07E-07 | 6.54E-01 | 2.65E-02 | 1.56E-04 | 6.30E-02 | 3.44E-01 |
| 147.98374 | 176.43 | 16.87 | 15.58 | 15.83 | 15.70 | 3.24E-10 | 4.03E-09 | 1.91E-06 | 2.47E-07 | 6.25E-01 | 9.36E-01 | 9.37E-01 |
| 147.9898  | 25.14  | 17.04 | 16.16 | 16.23 | 16.29 | 1.04E-08 | 1.54E-07 | 9.69E-07 | 1.83E-05 | 9.77E-01 | 8.48E-01 | 9.74E-01 |
| 148.0039  | 57.6   | 26.72 | 26.89 | 26.97 | 26.80 | 6.27E-02 | 3.00E-01 | 4.78E-02 | 8.68E-01 | 8.49E-01 | 8.01E-01 | 3.23E-01 |
| 148.01649 | 107.13 | 16.36 | 12.89 | 13.81 | 13.24 | 1.60E-19 | 7.36E-14 | 9.26E-11 | 1.07E-13 | 6.62E-02 | 8.02E-01 | 4.37E-01 |
| 148.02201 | 100.72 | 19.67 | 15.08 | 16.39 | 16.45 | 9.08E-40 | 3.65E-14 | 4.07E-14 | 5.36E-14 | 5.42E-05 | 3.86E-05 | 9.96E-01 |
| 148.02639 | 43.47  | 17.91 | 17.44 | 17.11 | 17.55 | 1.59E-04 | 3.90E-02 | 4.04E-05 | 1.80E-01 | 2.58E-01 | 9.42E-01 | 8.74E-02 |
| 148.02981 | 36.15  | 16.34 | 15.10 | 14.20 | 14.45 | 3.50E-11 | 4.08E-04 | 1.21E-10 | 4.26E-08 | 2.24E-02 | 1.87E-01 | 8.62E-01 |
| 148.03932 | 274.57 | 18.30 | 16.41 | 16.09 | 16.84 | 5.58E-23 | 7.56E-14 | 6.16E-14 | 2.57E-10 | 4.37E-01 | 1.88E-01 | 3.23E-03 |
| 148.04307 | 49.79  | 19.39 | 21.20 | 20.96 | 21.34 | 2.66E-28 | 5.76E-14 | 7.43E-14 | 4.41E-14 | 5.03E-01 | 8.37E-01 | 1.25E-01 |
| 148.04738 | 50.52  | 18.03 | 16.39 | 16.85 | 16.62 | 2.39E-37 | 3.65E-14 | 6.05E-14 | 3.70E-14 | 4.02E-04 | 2.03E-01 | 2.03E-01 |
| 148.05063 | 283.97 | 19.01 | 18.65 | 18.52 | 17.95 | 3.86E-05 | 3.03E-01 | 8.41E-02 | 8.41E-06 | 9.33E-01 | 9.74E-03 | 4.83E-02 |
| 148.06042 | 69.29  | 27.82 | 28.44 | 28.10 | 27.98 | 1.07E-08 | 2.57E-09 | 1.65E-02 | 3.47E-01 | 3.19E-03 | 4.90E-05 | 6.32E-01 |
| 148.06997 | 287.24 | 17.72 | 16.66 | 16.66 | 16.12 | 1.56E-10 | 1.36E-05 | 1.01E-05 | 8.65E-11 | 1.00E+00 | 9.55E-02 | 9.51E-02 |
| 148.07562 | 273.41 | 17.68 | 15.45 | 15.52 | 16.03 | 2.56E-20 | 7.28E-14 | 7.56E-14 | 4.35E-10 | 9.89E-01 | 9.56E-02 | 1.78E-01 |
| 148.07981 | 152.4  | 17.23 | 20.69 | 17.76 | 20.36 | 3.60E-22 | 7.54E-14 | 4.74E-01 | 1.31E-13 | 1.49E-12 | 8.38E-01 | 6.85E-10 |
| 148.08785 | 284.31 | 20.42 | 19.33 | 19.47 | 19.51 | 3.32E-02 | 4.11E-02 | 9.30E-02 | 1.36E-01 | 9.86E-01 | 9.76E-01 | 1.00E+00 |
| 148.09673 | 285.5  | 21.78 | 20.77 | 20.29 | 20.98 | 1.11E-01 | 3.58E-01 | 7.29E-02 | 5.89E-01 | 8.74E-01 | 9.88E-01 | 7.09E-01 |
| 148.1098  | 79.16  | 24.76 | 26.16 | 26.01 | 25.76 | 3.67E-17 | 7.41E-14 | 5.55E-13 | 2.11E-08 | 7.79E-01 | 7.70E-02 | 4.32E-01 |
| 148.11578 | 78.94  | 19.78 | 20.30 | 20.81 | 20.39 | 1.72E-04 | 9.80E-02 | 4.29E-05 | 4.37E-02 | 1.31E-01 | 9.82E-01 | 2.99E-01 |
| 148.51458 | 80.52  | 14.70 | 14.44 | 14.54 | 15.31 | 5.04E-01 | 9.69E-01 | 9.93E-01 | 7.32E-01 | 9.98E-01 | 4.85E-01 | 5.84E-01 |
| 148.51736 | 86.54  | 18.25 | 16.53 | 16.19 | 16.33 | 8.83E-11 | 7.46E-07 | 1.82E-09 | 6.87E-08 | 7.22E-01 | 9.35E-01 | 9.74E-01 |
| 148.53209 | 27.75  | 13.68 | 17.99 | 17.76 | 17.52 | 7.68E-29 | 4.34E-14 | 5.50E-14 | 7.41E-14 | 9.35E-01 | 6.37E-01 | 9.26E-01 |
| 148.53211 | 270.54 | 17.92 | 19.54 | 19.87 | 18.67 | 2.13E-07 | 4.59E-05 | 4.53E-07 | 1.72E-01 | 7.99E-01 | 9.32E-02 | 7.40E-03 |
| 148.53216 | 94.98  | 24.04 | 20.23 | 20.90 | 20.91 | 4.58E-40 | 3.65E-14 | 3.65E-14 | 3.72E-14 | 4.15E-02 | 4.55E-02 | 1.00E+00 |
| 148.5363  | 93.82  | 18.92 | 16.72 | 17.37 | 17.26 | 3.71E-25 | 4.07E-14 | 1.06E-13 | 8.03E-14 | 4.21E-03 | 3.24E-02 | 9.45E-01 |
| 148.56769 | 27.27  | 16.37 | 17.47 | 15.30 | 15.31 | 7.35E-75 | 3.65E-14 | 3.65E-14 | 3.70E-14 | 3.65E-14 | 3.65E-14 | 9.99E-01 |
| 148.9352  | 48.91  | 15.36 | 14.49 | 14.31 | 15.03 | 1.44E-06 | 2.12E-04 | 3.83E-06 | 3.96E-01 | 8.34E-01 | 7.01E-02 | 6.20E-03 |
| 148.94017 | 39.47  | 14.14 | 16.59 | 16.34 | 16.16 | 3.38E-23 | 7.23E-14 | 7.31E-14 | 1.12E-13 | 7.29E-01 | 3.01E-01 | 8.75E-01 |
| 148.94349 | 127.02 | 15.55 | 9.41  | 10.21 | 13.91 | 1.06E-28 | 4.16E-14 | 7.09E-14 | 1.30E-02 | 4.48E-01 | 2.36E-13 | 6.77E-10 |
| 148.96116 | 45.57  | 16.42 | 15.37 | 16.58 | 16.55 | 1.23E-04 | 2.11E-03 | 9.42E-01 | 9.71E-01 | 3.71E-04 | 9.23E-04 | 1.00E+00 |
| 148.96878 | 285.63 | 16.61 | 13.33 | 13.53 | 13.12 | 6.39E-16 | 4.43E-12 | 4.98E-11 | 9.28E-13 | 9.68E-01 | 9.71E-01 | 8.06E-01 |
| 148.97694 | 300.15 | 18.48 | 15.01 | 13.94 | 16.45 | 1.22E-19 | 2.94E-12 | 7.21E-14 | 1.03E-04 | 9.61E-02 | 1.55E-02 | 1.69E-06 |
| 148.98494 | 35.47  | 12.23 | 12.96 | 15.48 | 14.15 | 1.51E-09 | 4.58E-01 | 1.33E-09 | 1.11E-03 | 6.92E-06 | 1.04E-01 | 5.21E-02 |
| 148.98903 | 33.01  | 12.54 | 10.73 | 16.09 | 14.06 | 2.09E-19 | 2.64E-03 | 1.46E-10 | 2.14E-02 | 7.27E-14 | 2.04E-08 | 1.04E-03 |
| 149.00088 | 53.36  | 18.17 | 18.37 | 18.46 | 17.90 | 2.03E-06 | 2.00E-01 | 2.07E-02 | 5.48E-02 | 8.14E-01 | 1.26E-04 | 2.23E-06 |
| 149.00326 | 53.16  | 19.40 | 19.76 | 19.86 | 19.31 | 6.65E-09 | 1.12E-03 | 8.36E-06 | 7.70E-01 | 6.90E-01 | 6.21E-05 | 3.41E-07 |
| 149.00717 | 56.66  | 20.91 | 21.42 | 21.52 | 20.98 | 1.01E-13 | 5.18E-08 | 6.06E-11 | 8.64E-01 | 6.85E-01 | 1.12E-05 | 4.34E-08 |
| 149.0121  | 28.74  | 14.75 | 16.18 | 15.03 | 16.44 | 4.20E-06 | 5.99E-04 | 8.55E-01 | 5.36E-05 | 1.21E-02 | 9.08E-01 | 1.61E-03 |
| 149.01852 | 62.17  | 18.17 | 16.66 | 15.33 | 16.14 | 4.23E-20 | 4.72E-07 | 6.83E-14 | 3.70E-11 | 1.65E-05 | 2.76E-01 | 2.27E-02 |
| 149.02325 | 276.04 | 23.25 | 23.28 | 22.14 | 22.96 | 7.35E-02 | 1.00E+00 | 9.38E-02 | 9.38E-01 | 9.37E-02 | 9.20E-01 | 3.61E-01 |
| 149.02642 | 61.34  | 18.42 | 19.49 | 20.17 | 20.24 | 6.47E-21 | 1.87E-07 | 7.47E-14 | 7.43E-14 | 1.96E-03 | 8.73E-04 | 9.86E-01 |
| 149.03387 | 104.91 | 20.70 | 15.89 | 17.12 | 17.45 | 6.40E-50 | 3.65E-14 | 3.65E-14 | 3.67E-14 | 1.28E-05 | 6.01E-08 | 5.89E-01 |
| 149.03821 | 82.95  | 16.49 | 15.81 | 15.98 | 15.50 | 6.29E-05 | 5.56E-03 | 6.37E-02 | 2.77E-05 | 8.35E-01 | 4.98E-01 | 1.17E-01 |
| 149.04601 | 55.66  | 19.22 | 21.15 | 20.76 | 20.59 | 4.03E-18 | 7.26E-14 | 3.97E-12 | 2.38E-09 | 2.40E-01 | 4.66E-02 | 8.52E-01 |
| 149.05873 | 56.89  | 20.61 | 20.70 | 20.83 | 20.51 | 6.12E-04 | 6.65E-01 | 1.67E-02 | 5.48E-01 | 2.91E-01 | 8.77E-02 | 3.27E-04 |
| 149.0636  | 70.03  | 23.63 | 24.35 | 24.28 | 23.81 | 7.30E-13 | 1.27E-10 | 5.17E-09 | 2.90E-01 | 8.99E-01 | 8.64E-06 | 1.39E-04 |
| 149.07088 | 286.23 | 17.78 | 16.32 | 16.07 | 16.18 | 1.64E-14 | 1.99E-09 | 1.72E-12 | 1.45E-10 | 6.91E-01 | 9.30E-01 | 9.68E-01 |
| 149.07673 | 69.44  | 16.43 | 14.64 | 15.17 | 15.16 | 4.88E-26 | 3.76E-14 | 8.05E-14 | 9.70E-14 | 2.90E-03 | 5.71E-03 | 1.00E+00 |
| 149.08096 | 66.33  | 20.54 | 20.50 | 20.76 | 20.39 | 3.49E-04 | 9.77E-01 | 3.22E-02 | 3.11E-01 | 1.32E-02 | 5.69E-01 | 1.58E-04 |
| 149.09128 | 185.27 | 16.74 | 13.79 | 14.27 | 14.79 | 3.01E-41 | 3.65E-14 | 3.65E-14 | 7.05E-14 | 4.75E-02 | 2.25E-06 | 3.36E-02 |
| 149.09602 | 23     | 17.06 | 14.08 | 14.78 | 15.21 | 5.89E-58 | 3.65E-14 | 3.65E-14 | 3.65E-14 | 4.22E-06 | 6.56E-13 | 1.43E-02 |
| 149.09608 | 278.97 | 17.42 | 16.17 | 15.92 | 16.07 | 3.05E-11 | 2.96E-07 | 4.85E-10 | 6.87E-08 | 6.95E-01 | 9.76E-01 | 9.17E-01 |
| 149.10012 | 286.69 | 19.38 | 16.64 | 16.75 | 16.77 | 1.75E-27 | 5.85E-14 | 6.67E-14 | 7.37E-14 | 9.70E-01 | 9.61E-01 | 1.00E+00 |
| 149.10689 | 76.76  | 16.71 | 17.27 | 17.17 | 16.96 | 1.29E-04 | 1.43E-04 | 2.35E-03 | 2.43E-01 | 8.79E-01 | 1.11E-01 | 4.09E-01 |
| 149.11317 | 77.9   | 20.65 | 22.29 | 22.19 | 21.67 | 4.08E-19 | 7.34E-14 | 7.54E-14 | 3.30E-07 | 9.51E-01 | 5.46E-03 | 2.49E-02 |
| 149.13238 | 23.8   | 17.92 | 15.94 | 16.30 | 16.96 | 2.56E-34 | 3.65E-14 | 4.05E-14 | 7.01E-10 | 6.19E-02 | 2.31E-10 | 4.69E-05 |
| 149.13243 | 297.77 | 17.61 | 16.94 | 16.88 | 16.99 | 1.74E-02 | 5.05E-02 | 2.59E-02 | 8.98E-02 | 9.97E-01 | 9.98E-01 | 9.82E-01 |
| 149.46924 | 270.34 | 17.57 | 13.96 | 15.15 | 14.58 | 5.71E-13 | 1.74E-12 | 1.92E-06 | 1.04E-08 | 6.31E-02 | 5.92E-01 | 6.47E-01 |
| 149.48706 | 106.09 | 14.82 | 17.02 | 16.34 | 15.94 | 1.63E-10 | 4.72E-11 | 5.95E-06 | 2.25E-03 | 1.29E-01 | 5.36E-03 | 6.06E-01 |
| 149.49962 | 177.4  | 13.79 | 10.47 | 9.29  | 11.15 | 5.92E-11 | 1.28E-06 | 2.65E-11 | 2.78E-04 | 2.50E-01 | 7.28E-01 | 2.41E-02 |
| 149.50033 | 92.99  | 12.05 | 14.89 | 14.99 | 13.40 | 2.97E-06 | 4.04E-05 | 1.59E-05 | 1.49E-01 | 9.99E-01 | 1.03E-01 | 6.75E-02 |
| 149.51565 | 89.97  | 17.70 | 11.61 | 12.50 | 12.83 | 3.71E-68 | 3.65E-14 | 3.65E-14 | 3.65E-14 | 3.79E-03 | 4.35E-05 | 5.83E-01 |
| 149.53041 | 84.84  | 17.38 | 16.49 | 16.68 | 16.35 | 4.59E-09 | 7.91E-07 | 1.26E-04 | 2.39E-08 | 6.75E-01 | 8.58E-01 | 2.33E-01 |
| 149.53423 | 96.47  | 17.59 | 8.69  | 12.97 | 10.85 | 7.24E-37 | 3.65E-14 | 2.31E-13 | 4.63E-14 | 2.95E-11 | 2.38E-03 | 2.93E-03 |
| 149.54868 | 86.7   | 20.75 | 22.52 | 22.57 | 22.68 | 6.03E-25 | 7.36E-14 | 7.36E-14 | 7.29E-14 | 9.93E-01 | 8.56E-01 | 9.50E-01 |
| 149.55929 | 24.53  | 14.15 | 14.88 | 13.56 | 16.28 | 1.65E-06 | 4.31E-01 | 5.96E-01 | 1.30E-04 | 3.87E-02 | 3.06E-02 | 9.53E-07 |
| 149.57549 | 26.08  | 16.38 | 17.97 | 15.19 | 15.22 | 1.76E-87 | 3.65E-14 | 3.65E-14 | 3.67E-14 | 3.65E-14 | 3.65E-14 | 9.85E-01 |

|           |        |       |       |       |       |          |          |          |          |          |          |          |
|-----------|--------|-------|-------|-------|-------|----------|----------|----------|----------|----------|----------|----------|
| 149.59732 | 89.17  | 15.65 | 16.77 | 16.67 | 16.38 | 3.20E-04 | 5.21E-04 | 1.80E-03 | 6.03E-02 | 9.84E-01 | 5.46E-01 | 7.54E-01 |
| 149.94033 | 250.94 | 19.35 | 13.99 | 12.41 | 15.82 | 7.89E-46 | 3.65E-14 | 3.65E-14 | 7.43E-14 | 4.76E-04 | 6.52E-05 | 1.00E-13 |
| 149.94037 | 101.24 | 20.49 | 16.35 | 15.13 | 17.97 | 6.63E-45 | 3.65E-14 | 3.65E-14 | 2.55E-13 | 6.92E-04 | 5.32E-06 | 7.63E-14 |
| 149.95281 | 134.85 | 18.83 | 15.19 | 15.43 | 15.93 | 2.57E-24 | 6.67E-14 | 7.25E-14 | 1.47E-13 | 9.08E-01 | 1.71E-01 | 4.89E-01 |
| 149.99278 | 56.74  | 18.97 | 16.23 | 17.30 | 15.74 | 4.34E-19 | 1.25E-13 | 3.92E-06 | 7.45E-14 | 8.81E-03 | 5.05E-01 | 6.02E-05 |
| 149.99555 | 278.17 | 19.27 | 19.33 | 19.60 | 19.44 | 4.76E-01 | 9.94E-01 | 4.39E-01 | 8.83E-01 | 6.23E-01 | 9.64E-01 | 8.98E-01 |
| 149.99967 | 54.76  | 22.02 | 22.56 | 22.61 | 22.12 | 4.77E-12 | 5.63E-08 | 2.23E-09 | 7.30E-01 | 9.55E-01 | 3.60E-05 | 2.98E-06 |
| 150.00794 | 55.19  | 19.05 | 19.44 | 19.45 | 18.89 | 1.02E-10 | 9.97E-05 | 5.47E-05 | 2.54E-01 | 1.00E+00 | 6.41E-08 | 2.99E-08 |
| 150.0137  | 66.28  | 16.13 | 10.37 | 11.44 | 12.56 | 3.03E-33 | 3.65E-14 | 4.43E-14 | 9.25E-14 | 5.22E-02 | 5.05E-06 | 4.83E-02 |
| 150.01411 | 301.16 | 19.56 | 19.28 | 18.59 | 19.41 | 7.87E-03 | 7.73E-01 | 5.74E-03 | 9.62E-01 | 1.07E-01 | 9.73E-01 | 4.17E-02 |
| 150.02658 | 22.21  | 18.60 | 16.91 | 16.93 | 16.87 | 1.01E-29 | 5.14E-14 | 5.30E-14 | 5.23E-14 | 9.99E-01 | 9.95E-01 | 9.79E-01 |
| 150.02663 | 286.34 | 19.24 | 18.40 | 18.25 | 17.63 | 1.57E-04 | 7.07E-02 | 1.99E-02 | 4.97E-05 | 9.73E-01 | 1.54E-01 | 3.26E-01 |
| 150.03006 | 75.65  | 14.67 | 13.81 | 15.80 | 14.78 | 6.88E-03 | 4.00E-01 | 1.55E-01 | 9.97E-01 | 2.51E-03 | 3.38E-01 | 2.83E-01 |
| 150.03756 | 290.57 | 13.55 | 15.80 | 15.24 | 14.70 | 1.43E-07 | 8.18E-08 | 7.57E-05 | 2.00E-02 | 4.75E-01 | 3.34E-02 | 5.28E-01 |
| 150.03873 | 68.7   | 16.92 | 14.85 | 13.40 | 15.85 | 2.54E-12 | 4.01E-05 | 8.70E-13 | 9.47E-02 | 1.04E-02 | 1.57E-01 | 3.05E-06 |
| 150.04911 | 83.73  | 17.77 | 19.30 | 19.34 | 19.56 | 2.79E-19 | 4.72E-13 | 1.50E-13 | 7.47E-14 | 9.98E-01 | 5.71E-01 | 6.79E-01 |
| 150.0549  | 286.08 | 18.32 | 16.53 | 16.47 | 16.58 | 4.94E-18 | 1.90E-13 | 8.95E-14 | 1.89E-12 | 9.95E-01 | 9.96E-01 | 9.67E-01 |
| 150.05499 | 22.54  | 17.91 | 15.53 | 15.53 | 15.97 | 3.92E-26 | 6.36E-14 | 6.05E-14 | 8.28E-14 | 1.00E+00 | 2.48E-01 | 2.42E-01 |
| 150.05834 | 55.65  | 25.03 | 23.49 | 24.11 | 23.84 | 1.70E-44 | 3.65E-14 | 6.43E-14 | 3.65E-14 | 2.11E-10 | 1.46E-03 | 1.73E-02 |
| 150.06538 | 109.08 | 20.75 | 21.53 | 21.49 | 20.97 | 2.55E-14 | 1.67E-11 | 1.73E-10 | 2.05E-01 | 9.70E-01 | 4.60E-06 | 2.79E-05 |
| 150.06626 | 287.68 | 20.13 | 20.40 | 20.30 | 19.35 | 2.48E-02 | 8.70E-01 | 9.62E-01 | 1.31E-01 | 9.93E-01 | 2.53E-02 | 4.96E-02 |
| 150.08557 | 282.47 | 19.13 | 18.29 | 18.34 | 17.37 | 4.48E-07 | 1.95E-02 | 3.00E-02 | 5.47E-08 | 9.98E-01 | 1.47E-02 | 8.02E-03 |
| 150.0913  | 278.81 | 16.67 | 15.09 | 15.24 | 15.68 | 3.44E-14 | 7.25E-13 | 4.49E-11 | 1.60E-05 | 8.80E-01 | 2.68E-02 | 1.51E-01 |
| 150.09132 | 175.81 | 17.29 | 14.98 | 14.99 | 15.64 | 1.29E-31 | 3.70E-14 | 3.70E-14 | 7.96E-14 | 1.00E+00 | 4.67E-03 | 5.10E-03 |
| 150.10346 | 288.85 | 18.93 | 18.58 | 18.73 | 18.40 | 4.90E-01 | 7.34E-01 | 9.37E-01 | 4.35E-01 | 9.72E-01 | 9.61E-01 | 7.93E-01 |
| 150.11249 | 198.85 | 16.17 | 11.88 | 12.30 | 12.29 | 1.91E-42 | 3.65E-14 | 3.65E-14 | 3.65E-14 | 4.58E-01 | 4.96E-01 | 1.00E+00 |
| 150.11374 | 72.53  | 16.58 | 18.23 | 17.50 | 17.27 | 3.39E-15 | 7.41E-14 | 3.71E-06 | 1.33E-03 | 5.60E-04 | 6.40E-06 | 6.36E-01 |
| 150.11652 | 75.95  | 15.55 | 15.50 | 15.26 | 15.48 | 5.82E-01 | 9.97E-01 | 5.52E-01 | 9.90E-01 | 7.04E-01 | 1.00E+00 | 7.83E-01 |
| 150.51573 | 30.01  | 14.94 | 13.21 | 16.76 | 15.19 | 3.82E-17 | 8.59E-06 | 2.32E-06 | 9.08E-01 | 7.45E-14 | 1.45E-06 | 1.63E-04 |
| 150.52863 | 96.45  | 18.56 | 15.06 | 15.54 | 15.95 | 3.43E-28 | 3.76E-14 | 6.81E-14 | 7.49E-14 | 3.64E-01 | 1.85E-02 | 5.12E-01 |
| 150.53523 | 100.66 | 17.28 | 12.45 | 14.17 | 13.55 | 1.05E-26 | 3.72E-14 | 4.46E-13 | 7.41E-14 | 1.46E-04 | 4.16E-02 | 4.28E-01 |
| 150.53841 | 62.91  | 16.90 | 15.82 | 17.24 | 16.81 | 2.92E-07 | 6.47E-05 | 4.87E-01 | 9.85E-01 | 1.60E-07 | 7.07E-04 | 3.34E-01 |
| 150.54745 | 83.58  | 17.67 | 19.36 | 19.45 | 19.62 | 4.60E-22 | 8.08E-14 | 7.41E-14 | 7.53E-14 | 9.70E-01 | 5.75E-01 | 8.27E-01 |
| 150.55077 | 84.15  | 16.61 | 16.30 | 16.47 | 16.77 | 2.02E-01 | 4.73E-01 | 9.16E-01 | 8.79E-01 | 8.62E-01 | 1.61E-01 | 5.39E-01 |
| 150.91952 | 41.77  | 14.25 | 13.93 | 12.76 | 14.49 | 1.65E-08 | 6.53E-01 | 8.53E-07 | 8.30E-01 | 3.03E-04 | 2.23E-01 | 5.86E-08 |
| 150.9768  | 44.66  | 19.48 | 20.80 | 21.06 | 20.68 | 1.24E-27 | 7.32E-14 | 3.76E-14 | 7.47E-14 | 2.07E-01 | 8.25E-01 | 3.01E-02 |
| 151.003   | 53.05  | 16.29 | 15.38 | 15.59 | 15.51 | 4.47E-05 | 7.05E-05 | 3.55E-03 | 1.40E-03 | 7.36E-01 | 9.26E-01 | 9.82E-01 |
| 151.01213 | 88.97  | 18.79 | 22.53 | 22.85 | 21.68 | 9.69E-32 | 3.92E-14 | 3.65E-14 | 7.49E-14 | 7.49E-01 | 5.45E-02 | 2.61E-03 |
| 151.01702 | 77.81  | 15.63 | 9.05  | 9.73  | 10.73 | 2.53E-37 | 3.65E-14 | 3.65E-14 | 6.83E-14 | 4.47E-01 | 2.85E-03 | 1.54E-01 |
| 151.02415 | 183.87 | 16.35 | 13.20 | 13.84 | 14.33 | 2.70E-32 | 3.65E-14 | 5.45E-14 | 7.98E-14 | 3.20E-02 | 2.93E-05 | 1.79E-01 |
| 151.03527 | 92.77  | 20.74 | 21.54 | 21.74 | 21.87 | 1.05E-05 | 4.80E-03 | 1.55E-04 | 2.98E-05 | 8.27E-01 | 5.34E-01 | 9.53E-01 |
| 151.03902 | 104.54 | 23.15 | 20.29 | 21.49 | 20.87 | 2.86E-40 | 3.65E-14 | 7.46E-14 | 3.67E-14 | 1.11E-09 | 1.05E-02 | 5.05E-03 |
| 151.04196 | 41.49  | 15.32 | 15.12 | 14.96 | 15.52 | 2.74E-01 | 8.98E-01 | 5.81E-01 | 9.00E-01 | 9.46E-01 | 5.45E-01 | 2.41E-01 |
| 151.04788 | 71.12  | 19.31 | 19.38 | 19.22 | 19.13 | 6.48E-01 | 9.82E-01 | 9.64E-01 | 8.13E-01 | 8.43E-01 | 6.22E-01 | 9.76E-01 |
| 151.05833 | 188.74 | 16.69 | 14.72 | 14.87 | 14.59 | 3.40E-27 | 6.74E-14 | 7.41E-14 | 5.78E-14 | 8.74E-01 | 9.11E-01 | 4.98E-01 |
| 151.06153 | 253.56 | 18.43 | 16.77 | 17.14 | 16.77 | 5.22E-29 | 4.16E-14 | 7.43E-14 | 4.65E-14 | 6.03E-02 | 1.00E+00 | 6.49E-02 |
| 151.06167 | 48.42  | 20.55 | 18.69 | 19.51 | 19.15 | 3.00E-46 | 3.65E-14 | 7.05E-14 | 3.65E-14 | 7.26E-13 | 1.42E-04 | 4.65E-03 |
| 151.07524 | 284.81 | 19.14 | 17.86 | 17.94 | 17.64 | 8.50E-08 | 1.36E-05 | 4.13E-05 | 5.46E-07 | 9.92E-01 | 8.66E-01 | 7.15E-01 |
| 151.07931 | 289.07 | 20.26 | 19.57 | 19.10 | 20.08 | 2.85E-03 | 1.62E-01 | 2.69E-03 | 9.53E-01 | 5.05E-01 | 4.64E-01 | 2.59E-02 |
| 151.08658 | 133.54 | 18.07 | 15.81 | 16.53 | 16.58 | 8.29E-30 | 3.65E-14 | 7.27E-14 | 7.94E-14 | 2.14E-04 | 1.16E-04 | 9.92E-01 |
| 151.09679 | 190.42 | 16.59 | 14.26 | 15.00 | 14.82 | 5.63E-25 | 4.12E-14 | 2.74E-13 | 7.76E-14 | 1.69E-03 | 3.87E-02 | 8.17E-01 |
| 151.10685 | 213.25 | 15.80 | 11.79 | 13.09 | 12.42 | 5.11E-08 | 8.33E-08 | 4.53E-04 | 1.47E-05 | 2.47E-01 | 8.15E-01 | 7.89E-01 |
| 151.11166 | 22.94  | 17.77 | 15.50 | 16.33 | 16.28 | 2.67E-33 | 3.65E-14 | 7.51E-14 | 7.41E-14 | 1.52E-06 | 1.83E-05 | 9.84E-01 |
| 151.11167 | 289.29 | 18.33 | 17.06 | 17.14 | 17.24 | 2.28E-07 | 2.43E-06 | 8.38E-06 | 1.04E-04 | 9.90E-01 | 9.05E-01 | 9.80E-01 |
| 151.14412 | 33.8   | 18.80 | 17.71 | 17.46 | 16.76 | 1.58E-03 | 1.43E-01 | 4.03E-02 | 7.04E-04 | 9.61E-01 | 2.91E-01 | 5.62E-01 |
| 151.14803 | 23.05  | 16.82 | 13.24 | 14.10 | 14.73 | 8.06E-60 | 3.65E-14 | 3.65E-14 | 3.65E-14 | 1.29E-06 | 7.38E-14 | 9.54E-04 |
| 151.14808 | 279.15 | 17.29 | 15.48 | 15.49 | 15.70 | 4.80E-19 | 7.69E-14 | 7.55E-14 | 8.14E-12 | 1.00E+00 | 7.32E-01 | 7.57E-01 |
| 151.51295 | 86.92  | 16.89 | 19.28 | 19.68 | 18.79 | 1.34E-29 | 6.27E-14 | 3.67E-14 | 1.01E-13 | 2.73E-01 | 1.63E-01 | 8.54E-04 |
| 151.54069 | 100.83 | 19.85 | 16.93 | 17.60 | 17.19 | 4.67E-42 | 3.65E-14 | 3.72E-14 | 3.65E-14 | 2.80E-03 | 5.63E-01 | 1.46E-01 |
| 151.5463  | 77.63  | 15.26 | 14.11 | 14.50 | 14.10 | 1.02E-01 | 1.34E-01 | 4.61E-01 | 1.40E-01 | 8.94E-01 | 1.00E+00 | 8.89E-01 |
| 151.62555 | 57.23  | 15.83 | 14.97 | 14.88 | 15.55 | 2.57E-03 | 1.65E-02 | 5.58E-03 | 7.84E-01 | 9.90E-01 | 2.27E-01 | 1.20E-01 |
| 151.93742 | 136.86 | 18.48 | 14.91 | 14.78 | 16.17 | 9.19E-30 | 4.16E-14 | 3.74E-14 | 1.41E-11 | 9.74E-01 | 6.74E-04 | 1.10E-04 |
| 151.94075 | 115.48 | 17.11 | 11.97 | 11.37 | 14.46 | 3.29E-24 | 7.63E-14 | 5.94E-14 | 1.15E-05 | 6.87E-01 | 7.54E-05 | 4.19E-07 |
| 151.94962 | 291.22 | 19.79 | 18.15 | 18.29 | 17.87 | 1.86E-15 | 5.37E-11 | 1.37E-09 | 1.82E-13 | 9.30E-01 | 6.55E-01 | 2.96E-01 |
| 151.95005 | 30.4   | 18.20 | 15.97 | 16.44 | 17.54 | 1.19E-17 | 7.41E-14 | 4.16E-11 | 4.65E-02 | 2.58E-01 | 4.20E-08 | 1.61E-04 |
| 151.97192 | 265.88 | 18.71 | 15.24 | 15.30 | 16.00 | 6.83E-31 | 3.74E-14 | 3.76E-14 | 7.44E-14 | 9.97E-01 | 5.79E-02 | 8.88E-02 |
| 151.97197 | 120.92 | 18.16 | 14.57 | 15.09 | 14.86 | 1.35E-33 | 3.65E-14 | 4.79E-14 | 4.07E-14 | 2.36E-01 | 7.35E-01 | 8.51E-01 |
| 151.97861 | 126.93 | 16.73 | 13.29 | 13.61 | 14.60 | 1.74E-13 | 2.96E-12 | 1.46E-10 | 3.47E-05 | 8.96E-01 | 3.15E-02 | 1.56E-01 |

|           |        |       |       |       |       |           |          |          |          |          |          |          |
|-----------|--------|-------|-------|-------|-------|-----------|----------|----------|----------|----------|----------|----------|
| 151.97877 | 260.46 | 18.17 | 12.71 | 13.00 | 14.28 | 1.08E-24  | 6.38E-14 | 7.27E-14 | 7.24E-12 | 9.40E-01 | 1.86E-02 | 7.78E-02 |
| 151.98998 | 103.39 | 17.73 | 19.76 | 19.09 | 18.88 | 2.11E-19  | 7.25E-14 | 1.50E-10 | 1.96E-07 | 5.05E-03 | 1.66E-04 | 7.30E-01 |
| 152.00296 | 91.98  | 17.26 | 18.16 | 18.61 | 17.39 | 1.99E-08  | 1.02E-03 | 1.57E-07 | 9.59E-01 | 2.48E-01 | 1.12E-02 | 8.48E-06 |
| 152.01104 | 99.47  | 18.58 | 19.40 | 19.73 | 19.16 | 6.48E-08  | 1.33E-04 | 2.22E-08 | 1.70E-02 | 3.18E-01 | 6.25E-01 | 2.21E-02 |
| 152.01425 | 86.91  | 15.78 | 15.75 | 16.32 | 16.11 | 1.05E-01  | 1.00E+00 | 1.61E-01 | 5.97E-01 | 1.53E-01 | 5.64E-01 | 8.77E-01 |
| 152.01643 | 291.17 | 17.45 | 16.63 | 16.73 | 16.69 | 1.88E-05  | 8.50E-05 | 6.63E-04 | 5.23E-04 | 9.51E-01 | 9.88E-01 | 9.97E-01 |
| 152.01927 | 84.78  | 15.12 | 15.51 | 15.27 | 15.70 | 5.32E-02  | 2.67E-01 | 8.92E-01 | 4.71E-02 | 6.98E-01 | 8.48E-01 | 2.39E-01 |
| 152.02206 | 52.34  | 18.90 | 18.45 | 18.82 | 18.32 | 2.85E-05  | 4.66E-03 | 9.36E-01 | 1.69E-04 | 3.36E-02 | 7.81E-01 | 2.04E-03 |
| 152.03194 | 56.89  | 19.02 | 19.10 | 18.99 | 18.90 | 7.78E-01  | 9.79E-01 | 9.98E-01 | 9.01E-01 | 9.45E-01 | 7.26E-01 | 9.57E-01 |
| 152.03709 | 88.89  | 17.23 | 18.09 | 18.32 | 18.68 | 1.35E-07  | 2.47E-03 | 5.22E-05 | 1.08E-07 | 7.96E-01 | 1.02E-01 | 4.88E-01 |
| 152.04211 | 68.5   | 16.54 | 10.62 | 12.59 | 11.99 | 4.61E-18  | 7.48E-14 | 3.15E-09 | 4.87E-11 | 1.08E-02 | 1.56E-01 | 7.90E-01 |
| 152.05137 | 81.55  | 16.59 | 16.98 | 16.74 | 17.30 | 1.78E-02  | 3.07E-01 | 9.01E-01 | 1.26E-02 | 7.33E-01 | 5.38E-01 | 8.88E-02 |
| 152.05664 | 260.57 | 21.73 | 23.84 | 24.43 | 22.86 | 3.17E-32  | 6.45E-14 | 3.65E-14 | 4.60E-07 | 2.00E-02 | 2.21E-05 | 4.11E-12 |
| 152.06255 | 44.6   | 16.65 | 15.32 | 15.33 | 16.00 | 8.27E-03  | 1.70E-02 | 1.60E-02 | 4.92E-01 | 1.00E+00 | 4.76E-01 | 4.73E-01 |
| 152.07053 | 282.84 | 19.99 | 17.75 | 17.51 | 17.73 | 9.63E-20  | 1.29E-13 | 7.38E-14 | 2.10E-13 | 8.22E-01 | 1.00E+00 | 8.63E-01 |
| 152.07383 | 76.8   | 19.07 | 19.41 | 19.46 | 18.83 | 9.51E-04  | 1.72E-01 | 8.61E-02 | 5.02E-01 | 9.92E-01 | 6.29E-03 | 2.19E-03 |
| 152.07818 | 25.82  | 11.91 | 17.59 | 9.17  | 9.49  | 1.42E-134 | 3.65E-14 | 3.65E-14 | 3.65E-14 | 3.65E-14 | 3.65E-14 | 1.75E-01 |
| 152.08178 | 287.55 | 17.95 | 16.88 | 17.16 | 16.86 | 3.49E-08  | 5.93E-07 | 3.08E-04 | 6.95E-07 | 5.05E-01 | 1.00E+00 | 4.60E-01 |
| 152.10123 | 287.63 | 18.30 | 18.26 | 18.14 | 17.56 | 2.22E-02  | 9.99E-01 | 9.16E-01 | 2.28E-02 | 9.63E-01 | 4.29E-02 | 1.26E-01 |
| 152.107   | 140.65 | 17.41 | 15.55 | 15.82 | 16.08 | 2.82E-26  | 4.19E-14 | 7.27E-14 | 1.89E-13 | 3.61E-01 | 1.11E-02 | 4.10E-01 |
| 152.50366 | 94.71  | 15.55 | 15.48 | 15.81 | 15.31 | 1.43E-01  | 9.88E-01 | 5.65E-01 | 6.83E-01 | 3.95E-01 | 8.69E-01 | 9.85E-02 |
| 152.51342 | 87.96  | 16.49 | 17.15 | 17.28 | 16.53 | 1.42E-05  | 2.97E-03 | 2.06E-04 | 9.96E-01 | 9.15E-01 | 1.19E-02 | 1.26E-03 |
| 152.54027 | 275.86 | 15.34 | 15.58 | 14.20 | 15.84 | 5.07E-05  | 8.93E-01 | 6.25E-03 | 4.92E-01 | 7.90E-04 | 8.97E-01 | 6.72E-05 |
| 152.54033 | 114.26 | 21.29 | 17.27 | 18.48 | 18.07 | 2.74E-45  | 3.65E-14 | 3.70E-14 | 3.65E-14 | 2.81E-06 | 5.45E-03 | 3.26E-01 |
| 152.55301 | 84.82  | 15.69 | 15.66 | 15.77 | 15.37 | 3.72E-01  | 9.99E-01 | 9.87E-01 | 4.98E-01 | 9.68E-01 | 6.09E-01 | 3.32E-01 |
| 152.58445 | 86.83  | 16.63 | 15.85 | 16.21 | 16.52 | 2.69E-04  | 2.39E-04 | 1.12E-01 | 9.40E-01 | 2.28E-01 | 4.45E-03 | 4.00E-01 |
| 152.97474 | 54.4   | 15.52 | 14.89 | 15.76 | 15.50 | 2.49E-03  | 2.80E-02 | 7.33E-01 | 1.00E+00 | 1.37E-03 | 5.50E-02 | 7.10E-01 |
| 152.98142 | 63.82  | 18.44 | 14.10 | 15.14 | 16.05 | 9.03E-21  | 6.85E-14 | 2.79E-13 | 2.59E-07 | 6.80E-02 | 7.09E-05 | 1.53E-01 |
| 152.98759 | 138.52 | 15.75 | 13.63 | 14.08 | 13.83 | 1.50E-04  | 3.16E-04 | 6.45E-03 | 1.92E-03 | 8.35E-01 | 9.84E-01 | 9.68E-01 |
| 152.99126 | 170.46 | 16.26 | 13.58 | 14.42 | 15.67 | 4.11E-07  | 7.09E-07 | 1.02E-03 | 6.44E-01 | 3.49E-01 | 4.41E-04 | 7.11E-02 |
| 152.99486 | 131.99 | 17.93 | 16.26 | 16.99 | 17.29 | 5.39E-13  | 1.38E-13 | 2.58E-05 | 1.24E-02 | 5.62E-03 | 1.33E-05 | 4.79E-01 |
| 153.00087 | 264.88 | 15.61 | 16.12 | 16.59 | 15.79 | 2.36E-02  | 4.08E-01 | 1.70E-02 | 9.48E-01 | 2.24E-01 | 7.84E-01 | 1.07E-01 |
| 153.00103 | 152.6  | 14.88 | 15.35 | 15.65 | 14.97 | 1.67E-01  | 6.04E-01 | 1.69E-01 | 9.96E-01 | 8.60E-01 | 7.76E-01 | 3.11E-01 |
| 153.00606 | 95.48  | 16.77 | 19.26 | 18.93 | 18.31 | 7.19E-21  | 7.23E-14 | 7.55E-14 | 2.46E-08 | 5.59E-01 | 1.80E-03 | 7.76E-02 |
| 153.01112 | 97.03  | 16.29 | 16.56 | 16.68 | 15.21 | 1.13E-05  | 7.92E-01 | 5.46E-01 | 2.04E-03 | 9.81E-01 | 1.06E-04 | 1.78E-05 |
| 153.0222  | 25.04  | 12.38 | 16.10 | 13.13 | 16.48 | 3.91E-22  | 7.98E-14 | 2.94E-01 | 7.27E-14 | 6.51E-10 | 8.38E-01 | 1.21E-11 |
| 153.03229 | 85.45  | 18.29 | 18.38 | 18.74 | 18.86 | 4.36E-03  | 9.50E-01 | 5.06E-02 | 9.86E-03 | 2.00E-01 | 5.50E-02 | 9.17E-01 |
| 153.03539 | 83.75  | 17.40 | 12.30 | 13.61 | 13.49 | 2.38E-24  | 4.72E-14 | 8.43E-14 | 8.72E-14 | 2.27E-02 | 5.94E-02 | 9.94E-01 |
| 153.04065 | 266.63 | 18.46 | 19.92 | 19.67 | 19.23 | 3.08E-14  | 1.89E-13 | 4.89E-10 | 2.49E-04 | 4.96E-01 | 1.52E-03 | 8.77E-02 |
| 153.04072 | 53.42  | 24.87 | 23.27 | 23.33 | 23.91 | 3.33E-15  | 4.26E-13 | 1.53E-12 | 2.99E-05 | 9.91E-01 | 1.37E-02 | 2.93E-02 |
| 153.05396 | 255.34 | 17.22 | 17.14 | 17.02 | 16.13 | 4.97E-12  | 9.37E-01 | 4.92E-01 | 2.39E-11 | 8.56E-01 | 2.19E-09 | 1.08E-07 |
| 153.06002 | 264.75 | 17.04 | 19.40 | 19.67 | 18.20 | 1.07E-28  | 6.27E-14 | 3.76E-14 | 2.67E-06 | 6.17E-01 | 2.45E-06 | 4.15E-09 |
| 153.06578 | 276.02 | 20.33 | 19.09 | 18.19 | 18.94 | 1.47E-10  | 2.12E-04 | 2.45E-11 | 4.12E-05 | 1.67E-02 | 9.63E-01 | 7.57E-02 |
| 153.07382 | 293.06 | 17.01 | 16.56 | 16.51 | 15.75 | 2.36E-05  | 2.44E-01 | 1.59E-01 | 4.51E-06 | 9.97E-01 | 9.40E-03 | 1.56E-02 |
| 153.07718 | 71.61  | 23.41 | 23.99 | 24.00 | 23.34 | 3.10E-04  | 1.28E-02 | 1.07E-02 | 9.88E-01 | 1.00E+00 | 8.25E-03 | 6.89E-03 |
| 153.09093 | 286.53 | 19.12 | 17.37 | 17.40 | 17.42 | 1.66E-16  | 7.99E-13 | 1.07E-12 | 9.58E-12 | 9.99E-01 | 9.97E-01 | 1.00E+00 |
| 153.09094 | 21.15  | 18.04 | 15.58 | 16.00 | 16.60 | 1.03E-39  | 3.65E-14 | 3.65E-14 | 7.45E-14 | 3.74E-02 | 1.15E-08 | 1.62E-03 |
| 153.1022  | 203.39 | 16.67 | 14.24 | 14.77 | 14.84 | 3.33E-37  | 3.65E-14 | 3.92E-14 | 5.52E-14 | 7.39E-03 | 2.68E-03 | 9.77E-01 |
| 153.12729 | 25.08  | 18.32 | 16.65 | 16.74 | 17.15 | 2.78E-24  | 6.43E-14 | 7.27E-14 | 2.42E-11 | 9.54E-01 | 1.49E-02 | 5.72E-02 |
| 153.12732 | 287.31 | 19.35 | 17.71 | 17.81 | 17.80 | 5.30E-10  | 3.75E-08 | 1.64E-07 | 3.97E-07 | 9.88E-01 | 9.91E-01 | 1.00E+00 |
| 153.52058 | 86.01  | 16.24 | 17.12 | 17.40 | 16.88 | 1.87E-09  | 5.75E-06 | 1.04E-09 | 2.63E-03 | 4.06E-01 | 5.52E-01 | 2.47E-02 |
| 153.54133 | 191.96 | 15.42 | 15.56 | 15.70 | 16.79 | 1.04E-02  | 9.88E-01 | 9.05E-01 | 9.27E-03 | 9.87E-01 | 3.12E-02 | 6.90E-02 |
| 153.54735 | 103.57 | 17.49 | 15.62 | 15.71 | 15.71 | 1.04E-13  | 5.16E-11 | 2.53E-10 | 1.07E-09 | 9.88E-01 | 9.88E-01 | 1.00E+00 |
| 153.55686 | 87.79  | 15.40 | 16.69 | 16.40 | 16.44 | 3.80E-11  | 1.44E-10 | 6.03E-07 | 5.03E-07 | 4.12E-01 | 5.80E-01 | 9.96E-01 |
| 153.57237 | 24.54  | 14.77 | 16.52 | 14.84 | 17.69 | 6.03E-18  | 1.35E-06 | 9.96E-01 | 7.83E-14 | 6.86E-06 | 4.30E-03 | 1.33E-01 |
| 153.94841 | 288.6  | 19.21 | 17.27 | 17.62 | 16.94 | 1.84E-19  | 1.04E-13 | 2.48E-10 | 7.34E-14 | 4.37E-01 | 5.41E-01 | 2.72E-02 |
| 153.95907 | 269.42 | 16.56 | 12.89 | 11.16 | 14.15 | 2.20E-15  | 3.40E-08 | 7.39E-14 | 7.61E-04 | 2.81E-02 | 2.08E-01 | 2.62E-05 |
| 153.96827 | 128.41 | 15.16 | 14.46 | 16.20 | 14.96 | 4.07E-04  | 2.98E-01 | 4.23E-02 | 9.64E-01 | 1.64E-04 | 6.31E-01 | 1.74E-02 |
| 153.98688 | 55     | 19.32 | 17.70 | 18.46 | 17.01 | 3.43E-19  | 5.68E-11 | 8.18E-04 | 7.47E-14 | 6.50E-03 | 2.05E-02 | 2.27E-08 |
| 153.99451 | 167    | 14.14 | 13.15 | 13.58 | 14.48 | 2.95E-01  | 5.03E-01 | 8.56E-01 | 9.65E-01 | 9.34E-01 | 2.87E-01 | 6.19E-01 |
| 154.00035 | 130.05 | 15.81 | 17.66 | 14.36 | 16.61 | 3.66E-08  | 2.23E-03 | 2.41E-02 | 4.28E-01 | 1.09E-08 | 2.20E-01 | 2.45E-04 |
| 154.00498 | 254.94 | 19.47 | 16.77 | 16.82 | 17.56 | 2.41E-35  | 3.65E-14 | 3.65E-14 | 7.38E-14 | 9.93E-01 | 1.12E-03 | 2.61E-03 |
| 154.01694 | 137.33 | 17.91 | 19.19 | 19.61 | 19.26 | 2.30E-13  | 6.83E-08 | 7.65E-13 | 3.07E-08 | 2.45E-01 | 9.91E-01 | 4.24E-01 |
| 154.02485 | 56.64  | 20.91 | 18.94 | 18.96 | 19.64 | 1.65E-30  | 3.74E-14 | 3.74E-14 | 2.23E-12 | 9.99E-01 | 3.50E-04 | 4.78E-04 |
| 154.03594 | 49.45  | 19.34 | 18.60 | 18.69 | 18.95 | 5.37E-08  | 1.61E-07 | 3.95E-06 | 1.95E-02 | 9.05E-01 | 4.75E-02 | 2.03E-01 |
| 154.04411 | 51.15  | 20.66 | 18.63 | 18.82 | 19.17 | 1.23E-18  | 7.36E-14 | 9.76E-14 | 1.80E-09 | 8.38E-01 | 9.48E-02 | 4.19E-01 |
| 154.04918 | 81.08  | 20.36 | 19.82 | 20.29 | 19.48 | 2.79E-02  | 3.16E-01 | 9.95E-01 | 3.69E-02 | 4.70E-01 | 7.51E-01 | 7.65E-02 |
| 154.04976 | 296.95 | 17.73 | 16.48 | 16.50 | 16.42 | 1.93E-13  | 4.52E-10 | 5.51E-10 | 2.05E-10 | 1.00E+00 | 9.90E-01 | 9.78E-01 |

|           |        |       |       |       |       |          |          |          |          |          |          |          |
|-----------|--------|-------|-------|-------|-------|----------|----------|----------|----------|----------|----------|----------|
| 154.05353 | 80.36  | 15.29 | 15.85 | 15.63 | 15.64 | 3.75E-01 | 2.97E-01 | 7.16E-01 | 7.15E-01 | 9.00E-01 | 9.21E-01 | 1.00E+00 |
| 154.05908 | 53.49  | 22.49 | 22.29 | 22.07 | 22.04 | 1.51E-05 | 1.68E-01 | 1.41E-04 | 7.15E-05 | 1.39E-01 | 8.24E-02 | 9.90E-01 |
| 154.06918 | 195.32 | 16.40 | 13.66 | 13.98 | 14.49 | 2.72E-37 | 3.65E-14 | 3.65E-14 | 7.41E-14 | 3.21E-01 | 1.83E-04 | 4.62E-02 |
| 154.0692  | 33.16  | 16.56 | 14.92 | 14.60 | 15.45 | 1.25E-06 | 8.46E-05 | 1.40E-06 | 2.08E-02 | 8.41E-01 | 5.19E-01 | 1.29E-01 |
| 154.07421 | 52.15  | 14.55 | 14.98 | 14.06 | 14.78 | 1.66E-01 | 7.24E-01 | 6.31E-01 | 9.44E-01 | 1.34E-01 | 9.71E-01 | 3.40E-01 |
| 154.08619 | 288.38 | 18.03 | 16.87 | 16.95 | 16.93 | 6.89E-09 | 2.53E-07 | 1.35E-06 | 2.05E-06 | 9.82E-01 | 9.93E-01 | 1.00E+00 |
| 154.08625 | 23.66  | 17.93 | 15.62 | 15.84 | 16.30 | 4.51E-35 | 3.65E-14 | 3.67E-14 | 7.52E-14 | 5.57E-01 | 7.01E-04 | 4.08E-02 |
| 154.12263 | 281.53 | 16.72 | 15.13 | 14.99 | 15.35 | 4.69E-12 | 3.62E-09 | 9.59E-11 | 9.11E-07 | 9.46E-01 | 8.26E-01 | 4.97E-01 |
| 154.12267 | 194.03 | 17.45 | 14.92 | 15.19 | 15.22 | 1.09E-33 | 3.65E-14 | 3.94E-14 | 4.92E-14 | 5.14E-01 | 4.43E-01 | 9.98E-01 |
| 154.13074 | 199.64 | 16.20 | 13.37 | 13.64 | 14.01 | 1.93E-19 | 7.42E-14 | 8.25E-14 | 9.79E-11 | 8.08E-01 | 1.80E-01 | 6.43E-01 |
| 154.13391 | 195.84 | 16.31 | 14.30 | 14.90 | 14.83 | 3.34E-22 | 5.98E-14 | 1.97E-12 | 9.77E-13 | 8.14E-03 | 3.42E-02 | 9.81E-01 |
| 154.49728 | 86.58  | 16.66 | 13.20 | 14.75 | 13.07 | 2.20E-16 | 2.29E-13 | 5.27E-05 | 1.67E-13 | 2.47E-03 | 9.92E-01 | 1.20E-03 |
| 154.52263 | 86.9   | 15.28 | 18.21 | 18.43 | 17.17 | 1.73E-13 | 1.23E-10 | 3.40E-12 | 8.20E-05 | 9.56E-01 | 8.66E-02 | 2.19E-02 |
| 154.5365  | 84.25  | 16.63 | 10.55 | 12.36 | 12.68 | 1.93E-27 | 3.67E-14 | 7.43E-14 | 3.00E-13 | 1.47E-03 | 2.15E-04 | 9.24E-01 |
| 154.55075 | 106.72 | 16.86 | 14.86 | 14.58 | 14.91 | 2.85E-17 | 3.88E-12 | 7.85E-14 | 4.46E-11 | 7.35E-01 | 9.97E-01 | 6.24E-01 |
| 154.88027 | 48.22  | 14.66 | 13.73 | 14.26 | 13.98 | 2.46E-02 | 1.66E-02 | 5.64E-01 | 1.47E-01 | 3.49E-01 | 8.75E-01 | 8.28E-01 |
| 154.94159 | 279.66 | 23.65 | 21.71 | 22.48 | 22.33 | 2.39E-05 | 8.30E-06 | 1.51E-02 | 6.33E-03 | 2.20E-01 | 4.43E-01 | 9.82E-01 |
| 154.96586 | 29.29  | 14.54 | 11.47 | 15.83 | 12.54 | 4.45E-17 | 3.35E-09 | 3.26E-02 | 3.01E-04 | 7.49E-14 | 1.48E-01 | 1.53E-09 |
| 154.96682 | 299.77 | 18.28 | 15.15 | 13.59 | 15.92 | 1.84E-34 | 7.43E-14 | 3.65E-14 | 1.97E-11 | 1.15E-05 | 8.99E-02 | 7.90E-11 |
| 154.96915 | 49.23  | 14.38 | 13.85 | 15.02 | 14.45 | 7.29E-03 | 3.54E-01 | 1.88E-01 | 9.96E-01 | 2.61E-03 | 2.93E-01 | 3.34E-01 |
| 154.97615 | 132.65 | 15.22 | 14.57 | 16.05 | 13.68 | 1.78E-12 | 1.14E-01 | 1.83E-02 | 2.09E-06 | 5.52E-06 | 1.74E-02 | 7.71E-13 |
| 154.99017 | 276.54 | 22.58 | 18.38 | 17.37 | 19.94 | 1.01E-41 | 3.65E-14 | 3.65E-14 | 2.12E-13 | 9.34E-03 | 2.89E-05 | 1.38E-12 |
| 154.99872 | 71.84  | 16.19 | 14.22 | 14.61 | 15.56 | 1.30E-03 | 1.64E-03 | 1.70E-02 | 6.64E-01 | 8.90E-01 | 8.58E-02 | 3.31E-01 |
| 155.00249 | 185.94 | 11.53 | 12.56 | 12.59 | 13.00 | 1.26E-01 | 3.60E-01 | 3.22E-01 | 1.07E-01 | 1.00E+00 | 9.12E-01 | 9.28E-01 |
| 155.01092 | 123.23 | 18.21 | 17.29 | 17.98 | 17.52 | 3.62E-04 | 4.73E-04 | 7.40E-01 | 1.98E-02 | 1.91E-02 | 7.74E-01 | 2.31E-01 |
| 155.02049 | 93.29  | 16.52 | 18.44 | 18.73 | 17.75 | 1.60E-30 | 5.14E-14 | 3.65E-14 | 1.75E-10 | 3.49E-01 | 9.20E-04 | 6.58E-07 |
| 155.02434 | 87.6   | 14.74 | 15.95 | 15.70 | 15.10 | 1.52E-05 | 2.93E-05 | 1.28E-03 | 5.33E-01 | 7.82E-01 | 1.11E-02 | 1.21E-01 |
| 155.02867 | 54.14  | 16.37 | 16.01 | 14.59 | 15.72 | 6.33E-04 | 8.52E-01 | 3.42E-04 | 4.79E-01 | 9.18E-03 | 9.22E-01 | 6.90E-02 |
| 155.04348 | 63.4   | 18.13 | 15.57 | 14.87 | 15.58 | 3.06E-29 | 7.21E-14 | 3.67E-14 | 7.36E-14 | 3.91E-02 | 1.00E+00 | 4.54E-02 |
| 155.05586 | 52.06  | 16.95 | 14.70 | 13.53 | 15.72 | 1.15E-10 | 2.46E-05 | 4.45E-11 | 6.08E-02 | 8.16E-02 | 1.82E-01 | 1.10E-04 |
| 155.06201 | 55.68  | 17.78 | 17.33 | 16.84 | 17.19 | 3.91E-10 | 4.54E-03 | 5.68E-11 | 1.02E-04 | 1.85E-03 | 7.18E-01 | 6.30E-02 |
| 155.07016 | 285.26 | 17.87 | 16.03 | 15.97 | 16.30 | 3.50E-19 | 7.68E-14 | 7.55E-14 | 4.27E-11 | 9.93E-01 | 5.98E-01 | 4.29E-01 |
| 155.07509 | 45.36  | 18.44 | 16.36 | 16.49 | 16.40 | 6.90E-32 | 3.76E-14 | 4.54E-14 | 4.34E-14 | 8.67E-01 | 9.93E-01 | 9.63E-01 |
| 155.08144 | 277.24 | 20.57 | 18.33 | 18.02 | 19.08 | 2.48E-13 | 6.08E-10 | 1.71E-12 | 1.05E-04 | 8.07E-01 | 1.37E-01 | 1.34E-02 |
| 155.09104 | 276.96 | 16.98 | 16.38 | 16.47 | 16.14 | 5.36E-04 | 1.45E-02 | 5.11E-02 | 3.11E-04 | 9.67E-01 | 6.70E-01 | 3.85E-01 |
| 155.10658 | 284.99 | 18.97 | 17.46 | 17.28 | 17.36 | 2.10E-14 | 7.42E-10 | 4.55E-12 | 1.62E-10 | 8.67E-01 | 9.75E-01 | 9.88E-01 |
| 155.1066  | 20.79  | 18.06 | 15.57 | 15.84 | 16.12 | 5.06E-39 | 3.65E-14 | 3.65E-14 | 4.74E-14 | 4.10E-01 | 1.04E-02 | 3.52E-01 |
| 155.14301 | 204.07 | 16.37 | 12.80 | 13.57 | 14.35 | 2.96E-37 | 3.65E-14 | 3.76E-14 | 9.20E-14 | 6.45E-03 | 6.45E-09 | 8.00E-03 |
| 155.50356 | 249.96 | 18.25 | 18.52 | 19.14 | 18.48 | 1.08E-04 | 5.11E-01 | 4.31E-05 | 6.54E-01 | 1.20E-02 | 9.98E-01 | 8.44E-03 |
| 155.52074 | 84.63  | 17.94 | 15.23 | 14.34 | 15.65 | 2.24E-20 | 1.35E-12 | 7.05E-14 | 4.69E-09 | 6.18E-02 | 6.55E-01 | 2.13E-03 |
| 155.5258  | 81.43  | 16.41 | 16.39 | 16.23 | 16.42 | 7.58E-01 | 1.00E+00 | 7.88E-01 | 1.00E+00 | 8.58E-01 | 9.99E-01 | 7.89E-01 |
| 155.53047 | 123.42 | 14.21 | 14.56 | 13.99 | 13.83 | 4.17E-01 | 8.58E-01 | 9.53E-01 | 8.18E-01 | 5.76E-01 | 3.83E-01 | 9.84E-01 |
| 155.96286 | 121.11 | 17.21 | 14.47 | 14.98 | 13.98 | 2.08E-22 | 7.44E-14 | 8.81E-12 | 7.01E-14 | 3.45E-01 | 4.08E-01 | 8.82E-03 |
| 155.98567 | 39.66  | 19.02 | 11.96 | 13.60 | 14.17 | 7.00E-35 | 3.65E-14 | 4.76E-14 | 7.54E-14 | 5.43E-03 | 1.16E-04 | 6.64E-01 |
| 155.99064 | 169.52 | 16.36 | 8.46  | 8.42  | 11.11 | 7.77E-45 | 3.65E-14 | 3.65E-14 | 7.16E-14 | 1.00E+00 | 4.03E-06 | 2.33E-06 |
| 156.00176 | 30.42  | 15.17 | 13.17 | 16.94 | 16.46 | 9.64E-28 | 9.62E-10 | 4.28E-08 | 1.98E-04 | 3.72E-14 | 7.09E-14 | 4.13E-01 |
| 156.0053  | 158.57 | 14.02 | 14.20 | 14.24 | 14.07 | 9.53E-01 | 9.76E-01 | 9.56E-01 | 1.00E+00 | 1.00E+00 | 9.92E-01 | 9.82E-01 |
| 156.01938 | 37.99  | 16.84 | 12.93 | 16.03 | 15.47 | 4.98E-09 | 2.20E-09 | 5.21E-01 | 1.15E-01 | 4.64E-06 | 4.52E-04 | 8.04E-01 |
| 156.03637 | 102.02 | 17.42 | 13.09 | 13.53 | 14.68 | 4.60E-18 | 7.34E-14 | 1.30E-13 | 2.97E-07 | 8.04E-01 | 8.93E-03 | 9.36E-02 |
| 156.04214 | 50.59  | 25.19 | 25.33 | 25.22 | 25.30 | 6.49E-01 | 6.68E-01 | 9.92E-01 | 7.98E-01 | 8.39E-01 | 9.98E-01 | 9.24E-01 |
| 156.05058 | 28.87  | 13.27 | 12.43 | 15.55 | 13.47 | 1.43E-15 | 6.93E-02 | 6.72E-10 | 9.41E-01 | 7.49E-14 | 2.28E-02 | 1.15E-07 |
| 156.06547 | 284.27 | 18.95 | 17.75 | 17.68 | 17.35 | 1.13E-05 | 1.70E-03 | 6.70E-04 | 1.79E-05 | 9.97E-01 | 6.43E-01 | 7.59E-01 |
| 156.07215 | 55.48  | 24.51 | 23.76 | 24.00 | 23.36 | 1.34E-07 | 4.43E-04 | 3.12E-02 | 4.09E-08 | 5.89E-01 | 1.77E-01 | 6.46E-03 |
| 156.07676 | 74.84  | 26.31 | 25.73 | 25.89 | 26.02 | 9.68E-07 | 4.56E-07 | 3.50E-04 | 4.08E-02 | 4.54E-01 | 4.04E-02 | 5.94E-01 |
| 156.08478 | 212.86 | 16.63 | 13.74 | 13.90 | 14.75 | 3.61E-30 | 3.72E-14 | 4.05E-14 | 8.46E-13 | 8.95E-01 | 3.20E-04 | 3.59E-03 |
| 156.10182 | 286.69 | 18.10 | 17.24 | 17.28 | 17.08 | 2.05E-06 | 1.36E-04 | 2.97E-04 | 7.79E-06 | 9.96E-01 | 8.81E-01 | 7.70E-01 |
| 156.13829 | 167.91 | 16.88 | 15.60 | 15.31 | 15.22 | 3.55E-21 | 6.13E-12 | 7.49E-14 | 7.49E-14 | 3.11E-01 | 1.42E-01 | 9.64E-01 |
| 156.5071  | 29.97  | 14.63 | 17.17 | 18.11 | 17.45 | 5.00E-45 | 3.67E-14 | 3.65E-14 | 3.65E-14 | 3.78E-05 | 5.56E-01 | 8.87E-03 |
| 156.51846 | 90.81  | 22.01 | 18.99 | 18.38 | 20.30 | 7.82E-49 | 3.65E-14 | 3.65E-14 | 9.54E-14 | 1.62E-02 | 7.51E-09 | 7.29E-14 |
| 156.52454 | 87.81  | 15.58 | 15.99 | 15.49 | 15.82 | 6.97E-02 | 1.80E-01 | 9.68E-01 | 6.44E-01 | 7.52E-02 | 8.64E-01 | 3.91E-01 |
| 156.53849 | 72.3   | 15.83 | 15.62 | 16.19 | 14.85 | 6.04E-03 | 9.37E-01 | 7.52E-01 | 4.41E-02 | 4.20E-01 | 1.89E-01 | 2.96E-03 |
| 156.59256 | 97.05  | 13.02 | 16.00 | 14.88 | 15.22 | 5.33E-06 | 2.63E-06 | 6.46E-03 | 1.29E-03 | 2.29E-01 | 5.75E-01 | 9.43E-01 |
| 156.8452  | 42.95  | 16.19 | 17.28 | 17.46 | 17.75 | 2.55E-30 | 7.41E-14 | 6.18E-14 | 3.65E-14 | 4.70E-01 | 1.20E-03 | 8.28E-02 |
| 156.88537 | 100.57 | 15.35 | 14.90 | 13.66 | 15.21 | 5.49E-19 | 5.95E-02 | 7.43E-14 | 8.75E-01 | 3.84E-10 | 3.52E-01 | 1.16E-13 |
| 156.93779 | 116.14 | 16.96 | 14.23 | 15.73 | 14.36 | 1.12E-25 | 5.65E-14 | 5.57E-06 | 7.18E-14 | 5.96E-08 | 9.60E-01 | 1.58E-06 |
| 156.94597 | 123.21 | 17.65 | 15.47 | 16.87 | 15.81 | 1.36E-28 | 3.74E-14 | 8.63E-05 | 7.29E-14 | 2.51E-12 | 2.67E-01 | 2.36E-07 |
| 156.96599 | 290.07 | 17.01 | 9.50  | 9.24  | 13.58 | 1.03E-51 | 3.65E-14 | 3.65E-14 | 1.60E-12 | 9.33E-01 | 7.37E-14 | 7.52E-14 |
| 156.96955 | 142.12 | 17.53 | 12.32 | 12.98 | 14.51 | 2.57E-37 | 3.65E-14 | 3.65E-14 | 1.04E-13 | 2.57E-01 | 6.63E-08 | 2.33E-04 |

|           |        |       |       |       |       |          |          |          |          |          |          |          |
|-----------|--------|-------|-------|-------|-------|----------|----------|----------|----------|----------|----------|----------|
| 156.97476 | 93.25  | 18.45 | 20.67 | 21.27 | 20.03 | 4.69E-21 | 1.55E-13 | 6.96E-14 | 1.98E-07 | 1.27E-01 | 1.12E-01 | 9.17E-05 |
| 156.97959 | 26.05  | 18.73 | 15.50 | 18.23 | 17.67 | 1.69E-32 | 3.65E-14 | 1.27E-01 | 6.39E-05 | 4.39E-14 | 7.58E-14 | 9.52E-02 |
| 156.98403 | 254.81 | 20.81 | 17.20 | 16.98 | 17.53 | 4.58E-37 | 3.65E-14 | 3.65E-14 | 4.32E-14 | 8.63E-01 | 6.56E-01 | 2.20E-01 |
| 156.9906  | 162.44 | 17.48 | 12.60 | 12.13 | 15.73 | 2.39E-41 | 3.65E-14 | 3.65E-14 | 1.38E-05 | 5.73E-01 | 1.08E-13 | 7.43E-14 |
| 156.99397 | 89.1   | 13.04 | 15.98 | 15.98 | 15.38 | 1.57E-12 | 2.36E-10 | 1.44E-10 | 1.08E-06 | 1.00E+00 | 5.35E-01 | 5.17E-01 |
| 157.00947 | 35.83  | 18.33 | 12.65 | 14.20 | 15.48 | 1.98E-19 | 7.35E-14 | 8.48E-12 | 6.98E-06 | 3.44E-02 | 1.54E-05 | 1.25E-01 |
| 157.02051 | 113.97 | 18.79 | 15.52 | 15.99 | 15.91 | 9.42E-39 | 3.65E-14 | 3.67E-14 | 3.67E-14 | 1.62E-01 | 3.57E-01 | 9.82E-01 |
| 157.03464 | 87.29  | 15.02 | 14.73 | 14.97 | 14.97 | 7.34E-01 | 7.09E-01 | 9.96E-01 | 9.98E-01 | 8.38E-01 | 8.41E-01 | 1.00E+00 |
| 157.03924 | 49.71  | 17.12 | 15.93 | 16.02 | 16.29 | 3.64E-11 | 5.05E-10 | 7.04E-09 | 3.56E-05 | 9.55E-01 | 2.11E-01 | 4.62E-01 |
| 157.04533 | 59.4   | 20.82 | 21.13 | 21.04 | 20.93 | 7.99E-02 | 6.40E-02 | 2.79E-01 | 8.38E-01 | 8.98E-01 | 4.13E-01 | 8.17E-01 |
| 157.04958 | 211.2  | 16.67 | 14.56 | 14.94 | 14.86 | 1.49E-32 | 3.65E-14 | 5.85E-14 | 5.65E-14 | 8.97E-02 | 2.79E-01 | 9.62E-01 |
| 157.0498  | 28.24  | 17.06 | 18.78 | 19.06 | 19.20 | 2.88E-27 | 7.38E-14 | 6.14E-14 | 5.10E-14 | 4.62E-01 | 1.39E-01 | 8.78E-01 |
| 157.06077 | 176.45 | 16.59 | 16.80 | 15.43 | 14.60 | 5.77E-21 | 7.59E-01 | 7.69E-07 | 7.56E-14 | 1.33E-08 | 7.51E-14 | 2.00E-03 |
| 157.06887 | 204.49 | 15.98 | 12.54 | 13.40 | 13.72 | 1.97E-16 | 7.43E-14 | 2.91E-10 | 9.92E-08 | 1.16E-01 | 1.80E-02 | 8.55E-01 |
| 157.07351 | 66.78  | 19.77 | 18.95 | 19.19 | 19.04 | 3.06E-17 | 7.41E-14 | 7.92E-09 | 1.85E-12 | 4.40E-02 | 7.80E-01 | 3.71E-01 |
| 157.08011 | 79.92  | 22.38 | 21.87 | 22.08 | 21.93 | 1.43E-07 | 2.46E-07 | 4.76E-03 | 1.67E-05 | 1.05E-01 | 8.94E-01 | 4.31E-01 |
| 157.08339 | 38.63  | 16.81 | 16.81 | 15.73 | 16.67 | 1.79E-03 | 1.00E+00 | 3.50E-03 | 9.72E-01 | 5.48E-03 | 9.77E-01 | 2.49E-02 |
| 157.08548 | 232.5  | 17.98 | 15.87 | 15.98 | 16.63 | 8.90E-39 | 3.65E-14 | 3.65E-14 | 7.52E-14 | 8.68E-01 | 5.31E-06 | 1.22E-04 |
| 157.09714 | 286.56 | 16.71 | 15.61 | 15.58 | 15.92 | 8.36E-06 | 6.11E-05 | 3.43E-05 | 1.00E-02 | 1.00E+00 | 6.20E-01 | 5.60E-01 |
| 157.09722 | 151.7  | 17.83 | 16.26 | 16.26 | 17.04 | 5.36E-20 | 7.45E-14 | 7.34E-14 | 5.40E-05 | 1.00E+00 | 1.53E-04 | 1.24E-04 |
| 157.10107 | 23.76  | 17.17 | 14.44 | 14.77 | 15.82 | 3.17E-29 | 3.72E-14 | 5.65E-14 | 3.88E-08 | 4.63E-01 | 6.62E-08 | 4.91E-05 |
| 157.10118 | 186.62 | 16.60 | 13.68 | 14.05 | 14.36 | 1.73E-40 | 3.65E-14 | 3.65E-14 | 4.21E-14 | 2.23E-01 | 4.01E-03 | 3.90E-01 |
| 157.10836 | 73.79  | 16.97 | 16.56 | 17.09 | 17.00 | 7.65E-03 | 4.54E-02 | 8.90E-01 | 9.98E-01 | 7.06E-03 | 4.32E-02 | 9.56E-01 |
| 157.12222 | 22.52  | 17.14 | 14.47 | 14.39 | 15.02 | 7.97E-49 | 3.65E-14 | 3.65E-14 | 3.65E-14 | 9.68E-01 | 6.47E-03 | 1.23E-03 |
| 157.12222 | 286.77 | 18.02 | 16.81 | 16.79 | 16.77 | 3.62E-11 | 2.72E-08 | 1.06E-08 | 2.01E-08 | 9.99E-01 | 9.97E-01 | 1.00E+00 |
| 157.13357 | 32.11  | 15.40 | 13.83 | 13.24 | 13.56 | 1.87E-13 | 2.61E-07 | 1.04E-12 | 3.86E-09 | 1.67E-01 | 8.01E-01 | 6.88E-01 |
| 157.44442 | 108.75 | 14.84 | 12.59 | 14.38 | 12.94 | 2.69E-04 | 8.68E-04 | 8.55E-01 | 9.22E-03 | 1.63E-02 | 9.43E-01 | 9.03E-02 |
| 157.5072  | 99.12  | 16.93 | 14.67 | 15.12 | 15.64 | 2.10E-14 | 1.20E-13 | 7.28E-10 | 3.30E-05 | 3.70E-01 | 4.75E-03 | 2.63E-01 |
| 157.51902 | 83.01  | 18.49 | 15.70 | 15.91 | 16.09 | 4.22E-29 | 3.94E-14 | 5.67E-14 | 7.36E-14 | 8.06E-01 | 3.86E-01 | 8.86E-01 |
| 157.53733 | 27.68  | 13.29 | 17.13 | 16.03 | 16.39 | 1.20E-27 | 3.72E-14 | 7.61E-14 | 7.52E-14 | 3.57E-03 | 1.13E-01 | 6.86E-01 |
| 157.53736 | 273.83 | 18.31 | 21.14 | 21.30 | 20.37 | 6.19E-13 | 2.34E-10 | 1.62E-11 | 9.63E-06 | 9.82E-01 | 2.80E-01 | 1.35E-01 |
| 157.54637 | 59.49  | 16.15 | 14.35 | 15.99 | 15.06 | 5.97E-09 | 3.97E-08 | 9.45E-01 | 2.43E-03 | 1.27E-06 | 1.17E-01 | 1.73E-02 |
| 157.55487 | 137.48 | 16.09 | 14.22 | 14.29 | 13.90 | 3.03E-19 | 2.38E-13 | 9.04E-13 | 7.52E-14 | 9.88E-01 | 5.75E-01 | 3.75E-01 |
| 157.97543 | 88     | 16.59 | 16.87 | 17.58 | 16.83 | 5.33E-05 | 5.24E-01 | 2.30E-05 | 6.75E-01 | 7.24E-03 | 9.97E-01 | 4.90E-03 |
| 157.98099 | 70.06  | 18.60 | 15.36 | 14.22 | 15.51 | 5.68E-17 | 4.61E-10 | 7.58E-14 | 7.10E-09 | 9.08E-02 | 9.91E-01 | 4.95E-02 |
| 157.99438 | 32.94  | 14.77 | 13.23 | 16.31 | 14.39 | 3.83E-09 | 3.31E-03 | 2.76E-03 | 8.42E-01 | 5.08E-10 | 6.43E-02 | 2.82E-04 |
| 158.00277 | 302.04 | 18.35 | 17.93 | 17.16 | 18.00 | 3.30E-07 | 1.70E-01 | 7.64E-08 | 3.34E-01 | 1.51E-03 | 9.89E-01 | 6.55E-04 |
| 158.01747 | 90.59  | 18.31 | 12.95 | 14.82 | 13.14 | 4.28E-26 | 5.07E-14 | 1.36E-11 | 6.81E-14 | 8.92E-04 | 9.82E-01 | 4.74E-03 |
| 158.03928 | 61.11  | 21.95 | 21.54 | 21.53 | 21.51 | 3.58E-02 | 9.08E-02 | 7.73E-02 | 7.64E-02 | 1.00E+00 | 9.99E-01 | 1.00E+00 |
| 158.04494 | 172.22 | 16.46 | 11.68 | 12.56 | 13.33 | 2.18E-49 | 3.65E-14 | 3.65E-14 | 3.87E-14 | 4.08E-03 | 1.94E-08 | 2.24E-02 |
| 158.04634 | 46.24  | 16.80 | 16.00 | 16.11 | 16.05 | 3.25E-04 | 9.56E-04 | 5.76E-03 | 2.98E-03 | 9.52E-01 | 9.97E-01 | 9.90E-01 |
| 158.05634 | 78.69  | 16.20 | 16.40 | 16.39 | 16.30 | 8.32E-01 | 8.46E-01 | 8.60E-01 | 9.76E-01 | 1.00E+00 | 9.82E-01 | 9.86E-01 |
| 158.06334 | 199.41 | 16.09 | 13.36 | 13.78 | 13.59 | 8.04E-17 | 9.34E-14 | 4.00E-11 | 5.25E-12 | 5.72E-01 | 9.08E-01 | 9.39E-01 |
| 158.06797 | 116.59 | 13.74 | 14.87 | 11.30 | 14.26 | 1.24E-10 | 1.10E-01 | 8.83E-06 | 7.41E-01 | 1.89E-10 | 6.58E-01 | 2.79E-07 |
| 158.07668 | 58.13  | 16.85 | 17.34 | 17.00 | 17.34 | 1.84E-01 | 2.64E-01 | 9.47E-01 | 2.81E-01 | 5.95E-01 | 1.00E+00 | 6.08E-01 |
| 158.09644 | 152.34 | 17.66 | 15.86 | 16.45 | 16.68 | 5.87E-19 | 7.43E-14 | 1.90E-10 | 8.24E-07 | 7.35E-03 | 9.72E-05 | 5.80E-01 |
| 158.09971 | 206.62 | 16.09 | 13.02 | 13.80 | 13.46 | 3.38E-17 | 7.47E-14 | 7.14E-10 | 9.12E-12 | 1.15E-01 | 6.11E-01 | 7.76E-01 |
| 158.11757 | 166.52 | 18.59 | 19.79 | 18.40 | 19.79 | 5.16E-06 | 1.78E-03 | 9.42E-01 | 2.38E-03 | 3.08E-04 | 1.00E+00 | 4.36E-04 |
| 158.12879 | 60.16  | 15.57 | 14.42 | 14.41 | 14.17 | 6.56E-06 | 4.92E-04 | 3.48E-04 | 2.20E-05 | 1.00E+00 | 8.45E-01 | 8.64E-01 |
| 158.15385 | 24.31  | 18.28 | 17.54 | 17.30 | 17.47 | 4.79E-06 | 1.31E-03 | 6.20E-06 | 4.69E-04 | 6.25E-01 | 9.84E-01 | 8.48E-01 |
| 158.15387 | 287.44 | 19.39 | 18.87 | 18.32 | 18.39 | 1.46E-03 | 2.99E-01 | 2.20E-03 | 7.24E-03 | 2.90E-01 | 4.43E-01 | 9.96E-01 |
| 158.46094 | 107.33 | 15.69 | 12.81 | 14.31 | 12.76 | 1.55E-12 | 1.94E-10 | 4.57E-03 | 2.83E-10 | 2.68E-03 | 1.00E+00 | 2.45E-03 |
| 158.51629 | 97.23  | 17.45 | 11.64 | 12.14 | 13.41 | 1.70E-66 | 3.65E-14 | 3.65E-14 | 3.65E-14 | 2.01E-01 | 7.69E-10 | 1.19E-05 |
| 158.53586 | 85.76  | 18.66 | 18.82 | 18.33 | 18.43 | 5.99E-02 | 8.39E-01 | 2.94E-01 | 6.42E-01 | 6.00E-02 | 2.20E-01 | 9.56E-01 |
| 158.53954 | 95.51  | 18.41 | 13.99 | 14.73 | 14.36 | 1.66E-19 | 7.56E-14 | 1.12E-12 | 1.29E-13 | 4.29E-01 | 8.80E-01 | 8.84E-01 |
| 158.55377 | 83.77  | 16.78 | 16.64 | 16.15 | 17.09 | 2.89E-04 | 9.06E-01 | 1.17E-02 | 4.52E-01 | 9.28E-02 | 1.66E-01 | 1.13E-04 |
| 158.56456 | 24.49  | 15.63 | 15.91 | 14.46 | 17.29 | 4.31E-15 | 7.75E-01 | 4.61E-04 | 7.01E-07 | 1.58E-05 | 9.58E-05 | 7.45E-14 |
| 158.84367 | 43.44  | 18.32 | 18.23 | 18.39 | 18.47 | 4.82E-02 | 7.00E-01 | 7.96E-01 | 3.03E-01 | 2.13E-01 | 3.58E-02 | 8.35E-01 |
| 158.92204 | 97.72  | 16.02 | 20.16 | 18.36 | 19.37 | 1.58E-28 | 3.67E-14 | 2.80E-11 | 7.25E-14 | 8.79E-07 | 9.58E-02 | 1.81E-02 |
| 158.92778 | 268.69 | 16.72 | 8.25  | 9.05  | 10.43 | 5.74E-41 | 3.65E-14 | 3.65E-14 | 5.05E-14 | 4.73E-01 | 1.03E-03 | 7.39E-02 |
| 158.93459 | 254.49 | 17.96 | 16.13 | 16.17 | 16.43 | 3.29E-19 | 7.38E-14 | 7.37E-14 | 2.62E-11 | 9.98E-01 | 5.15E-01 | 6.15E-01 |
| 158.96136 | 299.55 | 21.17 | 17.59 | 16.56 | 19.38 | 1.07E-21 | 2.01E-13 | 6.81E-14 | 5.35E-04 | 1.01E-01 | 8.03E-04 | 2.10E-08 |
| 158.97234 | 87.68  | 17.12 | 17.06 | 17.85 | 17.02 | 9.11E-07 | 9.85E-01 | 5.13E-05 | 9.25E-01 | 2.16E-05 | 9.93E-01 | 1.08E-05 |
| 158.98104 | 252.82 | 19.15 | 15.41 | 15.18 | 15.43 | 3.68E-31 | 4.76E-14 | 3.74E-14 | 5.74E-14 | 8.96E-01 | 1.00E+00 | 8.81E-01 |
| 158.98105 | 151.07 | 18.90 | 17.03 | 17.64 | 17.74 | 1.62E-14 | 7.92E-14 | 7.60E-08 | 1.94E-06 | 2.97E-02 | 1.11E-02 | 9.74E-01 |
| 158.99652 | 99.16  | 17.31 | 15.28 | 15.65 | 15.98 | 2.69E-26 | 3.90E-14 | 7.36E-14 | 4.05E-12 | 1.54E-01 | 7.13E-04 | 2.37E-01 |
| 159.0008  | 274.69 | 20.86 | 21.28 | 21.58 | 21.32 | 2.37E-02 | 2.74E-01 | 1.20E-02 | 2.23E-01 | 6.10E-01 | 9.99E-01 | 7.26E-01 |
| 159.00744 | 20.41  | 16.17 | 14.57 | 18.07 | 16.42 | 2.80E-28 | 7.20E-09 | 4.93E-12 | 7.71E-01 | 3.65E-14 | 2.72E-10 | 1.36E-08 |

|           |        |       |       |       |       |           |          |          |          |          |          |          |
|-----------|--------|-------|-------|-------|-------|-----------|----------|----------|----------|----------|----------|----------|
| 159.01637 | 94.53  | 17.40 | 16.22 | 16.52 | 16.79 | 3.72E-07  | 1.90E-07 | 1.57E-04 | 2.31E-02 | 4.69E-01 | 4.45E-02 | 6.03E-01 |
| 159.01724 | 22.03  | 15.47 | 13.67 | 14.88 | 14.50 | 1.46E-10  | 2.63E-11 | 7.31E-02 | 8.13E-04 | 1.76E-05 | 9.49E-03 | 4.48E-01 |
| 159.02731 | 59.11  | 22.08 | 21.36 | 22.06 | 21.78 | 5.24E-03  | 6.89E-03 | 1.00E+00 | 5.63E-01 | 1.16E-02 | 2.66E-01 | 6.35E-01 |
| 159.03608 | 80.33  | 17.21 | 16.52 | 16.55 | 16.47 | 4.39E-04  | 3.25E-03 | 4.69E-03 | 1.87E-03 | 9.99E-01 | 9.95E-01 | 9.82E-01 |
| 159.04358 | 47.7   | 17.10 | 15.91 | 15.98 | 16.26 | 7.12E-12  | 1.63E-10 | 1.44E-09 | 1.63E-05 | 9.73E-01 | 2.06E-01 | 4.04E-01 |
| 159.05117 | 49.8   | 17.09 | 16.20 | 16.56 | 16.91 | 2.56E-02  | 2.03E-02 | 2.98E-01 | 9.38E-01 | 6.59E-01 | 1.28E-01 | 6.96E-01 |
| 159.05467 | 31.23  | 16.53 | 17.58 | 16.89 | 17.32 | 2.44E-04  | 2.06E-04 | 4.62E-01 | 1.22E-02 | 3.64E-02 | 7.51E-01 | 3.61E-01 |
| 159.06525 | 157.77 | 16.67 | 14.07 | 13.80 | 14.98 | 1.12E-41  | 3.65E-14 | 3.65E-14 | 7.36E-14 | 4.82E-01 | 1.75E-05 | 1.37E-08 |
| 159.07645 | 163.97 | 17.53 | 20.60 | 17.81 | 20.65 | 2.17E-21  | 9.40E-14 | 8.71E-01 | 1.05E-13 | 6.38E-12 | 9.99E-01 | 9.15E-12 |
| 159.08044 | 204.48 | 16.42 | 13.29 | 14.10 | 13.77 | 8.95E-19  | 7.61E-14 | 8.85E-11 | 1.14E-12 | 7.78E-02 | 5.09E-01 | 7.75E-01 |
| 159.08444 | 286.6  | 18.07 | 16.31 | 16.03 | 16.43 | 1.06E-19  | 1.51E-13 | 7.38E-14 | 1.04E-11 | 5.78E-01 | 9.43E-01 | 2.69E-01 |
| 159.09176 | 39.94  | 19.97 | 18.78 | 19.22 | 19.11 | 2.43E-25  | 3.85E-14 | 2.83E-12 | 9.03E-14 | 1.04E-04 | 9.13E-03 | 7.05E-01 |
| 159.09575 | 74.06  | 15.81 | 14.80 | 15.17 | 15.51 | 8.09E-05  | 4.38E-05 | 1.87E-02 | 5.46E-01 | 3.62E-01 | 1.37E-02 | 4.52E-01 |
| 159.11272 | 284.21 | 20.55 | 19.47 | 19.25 | 19.61 | 1.22E-04  | 2.56E-03 | 1.25E-04 | 1.42E-02 | 8.86E-01 | 9.75E-01 | 6.71E-01 |
| 159.11673 | 23.84  | 18.08 | 15.32 | 16.27 | 16.98 | 2.58E-34  | 3.65E-14 | 7.36E-14 | 1.22E-07 | 4.91E-06 | 8.83E-14 | 1.74E-03 |
| 159.1168  | 181.35 | 17.75 | 15.19 | 15.53 | 15.91 | 5.68E-30  | 3.67E-14 | 5.38E-14 | 7.58E-14 | 3.61E-01 | 4.29E-03 | 2.56E-01 |
| 159.12091 | 56.27  | 19.72 | 18.17 | 19.53 | 18.82 | 9.79E-17  | 7.52E-14 | 6.91E-01 | 7.11E-06 | 5.84E-12 | 2.98E-03 | 8.98E-04 |
| 159.15731 | 193.88 | 16.35 | 14.36 | 14.57 | 14.90 | 5.13E-36  | 3.65E-14 | 3.65E-14 | 7.41E-14 | 4.58E-01 | 1.98E-03 | 1.19E-01 |
| 159.5025  | 277.52 | 16.40 | 16.91 | 16.82 | 16.79 | 2.94E-01  | 2.90E-01 | 4.41E-01 | 5.52E-01 | 9.92E-01 | 9.79E-01 | 9.99E-01 |
| 159.50262 | 91.11  | 16.51 | 15.85 | 15.88 | 15.83 | 2.14E-03  | 9.35E-03 | 1.28E-02 | 7.96E-03 | 9.99E-01 | 9.99E-01 | 9.94E-01 |
| 159.55258 | 28.62  | 16.96 | 19.65 | 20.38 | 20.16 | 1.41E-46  | 3.65E-14 | 3.65E-14 | 3.65E-14 | 3.12E-03 | 8.11E-02 | 7.49E-01 |
| 159.94697 | 275.7  | 21.96 | 22.10 | 22.32 | 21.60 | 1.44E-03  | 8.57E-01 | 1.55E-01 | 1.80E-01 | 5.89E-01 | 3.55E-02 | 5.60E-04 |
| 159.94706 | 27.76  | 14.99 | 17.82 | 18.09 | 17.36 | 5.34E-43  | 3.65E-14 | 3.65E-14 | 3.92E-14 | 5.29E-01 | 1.01E-01 | 1.91E-03 |
| 159.9691  | 298.33 | 18.94 | 15.68 | 14.82 | 16.82 | 1.70E-28  | 7.36E-14 | 3.67E-14 | 6.43E-09 | 4.81E-02 | 5.57E-03 | 8.18E-08 |
| 160.01752 | 86.23  | 17.64 | 21.70 | 21.89 | 20.87 | 2.23E-37  | 3.65E-14 | 3.65E-14 | 6.85E-14 | 9.22E-01 | 4.62E-02 | 7.12E-03 |
| 160.02547 | 77.91  | 19.00 | 15.58 | 15.53 | 16.16 | 1.34E-27  | 5.47E-14 | 4.76E-14 | 7.43E-14 | 9.98E-01 | 2.79E-01 | 2.03E-01 |
| 160.0311  | 47.59  | 17.87 | 16.07 | 16.70 | 16.74 | 7.73E-09  | 2.03E-09 | 1.35E-04 | 4.30E-04 | 1.16E-01 | 1.01E-01 | 9.99E-01 |
| 160.03413 | 198.63 | 15.10 | 16.45 | 16.74 | 16.74 | 1.60E-06  | 5.73E-04 | 1.30E-05 | 2.61E-05 | 8.38E-01 | 8.45E-01 | 1.00E+00 |
| 160.04016 | 93.9   | 17.87 | 10.55 | 12.84 | 12.73 | 1.83E-24  | 4.14E-14 | 2.16E-13 | 3.39E-13 | 2.16E-03 | 5.96E-03 | 9.98E-01 |
| 160.04399 | 96.26  | 17.66 | 13.97 | 14.69 | 14.89 | 8.36E-21  | 7.34E-14 | 1.32E-13 | 1.00E-11 | 2.14E-01 | 7.97E-02 | 9.52E-01 |
| 160.05425 | 29.19  | 14.53 | 15.25 | 16.39 | 16.53 | 3.32E-11  | 8.07E-02 | 1.08E-08 | 3.06E-09 | 1.38E-03 | 4.22E-04 | 9.72E-01 |
| 160.06035 | 279.25 | 22.29 | 21.21 | 20.29 | 21.47 | 1.72E-06  | 1.54E-02 | 2.82E-07 | 1.20E-01 | 5.74E-02 | 9.03E-01 | 9.58E-03 |
| 160.07002 | 211.59 | 16.12 | 11.49 | 11.41 | 12.50 | 2.47E-19  | 7.47E-14 | 7.27E-14 | 5.61E-10 | 9.99E-01 | 2.49E-01 | 1.86E-01 |
| 160.07571 | 30.41  | 22.72 | 23.49 | 23.85 | 23.50 | 1.15E-05  | 3.84E-03 | 4.94E-06 | 4.67E-03 | 4.12E-01 | 1.00E+00 | 4.52E-01 |
| 160.07951 | 177.18 | 16.44 | 15.06 | 14.66 | 15.78 | 1.01E-28  | 7.56E-14 | 3.67E-14 | 5.96E-05 | 2.94E-02 | 1.50E-05 | 5.37E-12 |
| 160.08787 | 207.1  | 16.62 | 13.34 | 13.87 | 13.82 | 1.36E-19  | 7.59E-14 | 3.76E-13 | 7.40E-13 | 4.30E-01 | 5.54E-01 | 9.99E-01 |
| 160.09675 | 262.26 | 23.06 | 20.48 | 20.27 | 20.74 | 3.28E-15  | 1.87E-11 | 3.78E-13 | 3.72E-09 | 9.39E-01 | 8.96E-01 | 5.83E-01 |
| 160.10637 | 209.37 | 16.35 | 14.35 | 14.70 | 14.35 | 3.28E-18  | 7.97E-14 | 4.20E-11 | 9.58E-14 | 4.51E-01 | 1.00E+00 | 4.72E-01 |
| 160.11613 | 169.27 | 17.17 | 14.89 | 14.77 | 15.70 | 4.86E-32  | 3.74E-14 | 3.65E-14 | 2.40E-12 | 9.21E-01 | 3.16E-04 | 1.98E-05 |
| 160.13318 | 50.97  | 27.55 | 27.39 | 27.69 | 27.56 | 2.60E-01  | 7.12E-01 | 7.33E-01 | 9.99E-01 | 1.79E-01 | 6.77E-01 | 8.30E-01 |
| 160.16945 | 24.03  | 16.69 | 14.03 | 14.62 | 15.20 | 1.62E-18  | 7.52E-14 | 2.80E-12 | 1.47E-06 | 1.55E-01 | 3.72E-04 | 1.71E-01 |
| 160.18083 | 30.91  | 17.16 | 14.91 | 14.79 | 15.77 | 1.59E-20  | 7.32E-14 | 7.56E-14 | 5.17E-07 | 9.60E-01 | 6.25E-03 | 1.04E-03 |
| 160.49709 | 32.99  | 11.66 | 12.14 | 16.57 | 14.97 | 7.89E-16  | 8.57E-01 | 1.57E-13 | 1.21E-06 | 5.08E-11 | 7.95E-05 | 5.51E-02 |
| 160.50228 | 111.11 | 18.66 | 17.45 | 18.40 | 17.57 | 1.13E-06  | 1.42E-05 | 7.16E-01 | 2.00E-04 | 1.51E-03 | 9.65E-01 | 1.04E-02 |
| 160.5178  | 86.63  | 15.84 | 17.99 | 18.09 | 17.52 | 5.97E-27  | 6.14E-14 | 4.65E-14 | 1.44E-13 | 9.68E-01 | 1.08E-01 | 3.37E-02 |
| 160.52211 | 195.77 | 11.89 | 14.38 | 14.90 | 15.32 | 1.40E-15  | 2.00E-08 | 8.45E-12 | 1.57E-13 | 5.95E-01 | 1.30E-01 | 7.57E-01 |
| 160.52671 | 102.06 | 17.83 | 10.21 | 10.55 | 14.19 | 1.48E-20  | 7.41E-14 | 7.41E-14 | 7.80E-05 | 9.74E-01 | 2.50E-05 | 1.25E-04 |
| 160.5363  | 79.51  | 16.65 | 15.30 | 15.33 | 14.59 | 2.17E-05  | 5.87E-03 | 6.52E-03 | 9.63E-06 | 1.00E+00 | 3.54E-01 | 3.15E-01 |
| 160.54189 | 88.8   | 16.93 | 12.38 | 13.92 | 13.25 | 4.44E-27  | 3.74E-14 | 1.84E-13 | 7.38E-14 | 3.79E-04 | 1.19E-01 | 3.14E-01 |
| 160.58014 | 24.76  | 14.35 | 16.15 | 13.72 | 16.39 | 2.29E-17  | 1.84E-07 | 1.77E-01 | 7.51E-09 | 5.79E-12 | 8.86E-01 | 2.67E-13 |
| 160.84124 | 44.97  | 17.42 | 16.32 | 16.46 | 16.71 | 1.28E-24  | 5.14E-14 | 7.54E-14 | 1.11E-10 | 4.79E-01 | 1.22E-03 | 8.07E-02 |
| 160.92015 | 109.86 | 12.70 | 13.62 | 10.72 | 13.98 | 1.35E-15  | 6.57E-02 | 9.33E-07 | 4.78E-03 | 3.47E-12 | 7.89E-01 | 1.05E-13 |
| 160.95052 | 102.19 | 17.59 | 15.22 | 16.21 | 15.38 | 7.96E-25  | 5.67E-14 | 2.38E-09 | 7.45E-14 | 6.28E-05 | 9.03E-01 | 1.50E-03 |
| 160.96453 | 36.88  | 20.94 | 16.23 | 16.30 | 18.13 | 2.88E-87  | 3.65E-14 | 3.65E-14 | 3.65E-14 | 9.66E-01 | 4.72E-14 | 5.72E-14 |
| 160.97115 | 31.75  | 17.17 | 12.33 | 12.80 | 13.53 | 5.01E-65  | 3.65E-14 | 3.65E-14 | 3.65E-14 | 1.26E-01 | 1.09E-06 | 6.46E-03 |
| 160.97708 | 265.4  | 17.74 | 15.17 | 15.07 | 15.66 | 2.41E-15  | 3.22E-12 | 3.61E-13 | 3.61E-08 | 9.90E-01 | 5.12E-01 | 3.33E-01 |
| 160.99087 | 26.68  | 16.28 | 19.66 | 14.96 | 15.20 | 2.30E-105 | 3.65E-14 | 4.92E-14 | 7.52E-14 | 3.65E-14 | 3.65E-14 | 2.18E-01 |
| 160.99979 | 95.51  | 17.13 | 15.84 | 16.61 | 16.15 | 2.22E-09  | 2.16E-09 | 4.14E-02 | 1.34E-05 | 9.22E-04 | 4.42E-01 | 1.16E-01 |
| 161.00858 | 92.99  | 13.42 | 17.79 | 18.11 | 16.63 | 5.63E-29  | 4.98E-14 | 3.74E-14 | 2.79E-13 | 8.48E-01 | 2.64E-02 | 1.89E-03 |
| 161.01226 | 28.67  | 14.37 | 17.43 | 17.44 | 17.40 | 2.72E-30  | 4.65E-14 | 4.34E-14 | 5.78E-14 | 1.00E+00 | 9.99E-01 | 9.99E-01 |
| 161.01625 | 86.69  | 15.49 | 18.50 | 18.68 | 17.91 | 1.01E-32  | 3.74E-14 | 3.65E-14 | 7.47E-14 | 8.74E-01 | 1.07E-01 | 1.44E-02 |
| 161.01942 | 80     | 15.36 | 15.68 | 15.90 | 15.60 | 4.16E-02  | 3.42E-01 | 2.10E-02 | 5.98E-01 | 6.41E-01 | 9.83E-01 | 4.26E-01 |
| 161.02305 | 86.5   | 18.02 | 12.22 | 12.57 | 14.62 | 2.76E-49  | 3.65E-14 | 3.65E-14 | 7.38E-14 | 7.14E-01 | 1.46E-10 | 3.44E-08 |
| 161.03779 | 62.79  | 16.61 | 10.84 | 11.87 | 12.72 | 2.87E-15  | 8.98E-14 | 1.09E-10 | 3.68E-07 | 4.53E-01 | 4.55E-02 | 6.23E-01 |
| 161.0404  | 49.84  | 16.83 | 15.84 | 15.52 | 14.29 | 2.06E-08  | 4.66E-02 | 3.14E-03 | 2.63E-09 | 8.40E-01 | 8.48E-04 | 1.23E-02 |
| 161.04629 | 39.15  | 15.76 | 14.77 | 15.11 | 14.59 | 2.58E-03  | 1.27E-02 | 1.84E-01 | 2.97E-03 | 7.21E-01 | 9.58E-01 | 4.20E-01 |
| 161.05668 | 87.03  | 21.72 | 23.20 | 23.31 | 23.41 | 1.35E-18  | 1.68E-12 | 1.02E-13 | 8.00E-14 | 9.42E-01 | 7.06E-01 | 9.52E-01 |
| 161.05969 | 20.69  | 16.31 | 14.93 | 13.09 | 14.38 | 7.21E-25  | 2.31E-06 | 3.74E-14 | 8.02E-11 | 5.45E-10 | 1.99E-01 | 3.40E-05 |

|           |        |       |       |       |       |           |          |          |          |          |          |          |
|-----------|--------|-------|-------|-------|-------|-----------|----------|----------|----------|----------|----------|----------|
| 161.05972 | 165.42 | 17.69 | 17.42 | 15.64 | 16.59 | 1.16E-17  | 6.41E-01 | 7.49E-14 | 1.92E-05 | 1.44E-12 | 2.95E-03 | 3.76E-04 |
| 161.06372 | 285.99 | 19.11 | 17.37 | 17.19 | 17.83 | 1.74E-12  | 1.56E-09 | 1.54E-11 | 2.18E-05 | 8.96E-01 | 3.50E-01 | 8.91E-02 |
| 161.07097 | 168.39 | 17.56 | 15.01 | 15.21 | 15.87 | 4.18E-33  | 3.65E-14 | 3.72E-14 | 8.24E-14 | 7.43E-01 | 1.69E-04 | 5.76E-03 |
| 161.07984 | 38.87  | 19.47 | 20.05 | 20.49 | 19.99 | 5.85E-04  | 7.37E-02 | 1.59E-04 | 1.51E-01 | 2.91E-01 | 9.95E-01 | 2.01E-01 |
| 161.0912  | 286.89 | 18.74 | 16.82 | 16.88 | 16.86 | 3.07E-17  | 2.51E-13 | 6.13E-13 | 1.61E-12 | 9.95E-01 | 9.99E-01 | 1.00E+00 |
| 161.09597 | 22.56  | 17.22 | 14.60 | 15.53 | 16.22 | 4.42E-43  | 3.65E-14 | 4.41E-14 | 1.73E-09 | 2.24E-08 | 7.25E-14 | 7.48E-05 |
| 161.09601 | 296.74 | 17.68 | 16.64 | 16.72 | 16.62 | 8.18E-07  | 1.68E-05 | 7.68E-05 | 2.03E-05 | 9.81E-01 | 1.00E+00 | 9.70E-01 |
| 161.10011 | 291.63 | 18.64 | 16.69 | 16.49 | 16.78 | 4.00E-16  | 1.03E-11 | 1.30E-13 | 2.44E-10 | 8.78E-01 | 9.88E-01 | 7.13E-01 |
| 161.13238 | 274.91 | 18.85 | 16.46 | 16.20 | 17.11 | 8.65E-23  | 7.27E-14 | 6.74E-14 | 7.82E-10 | 7.28E-01 | 7.53E-02 | 3.62E-03 |
| 161.13652 | 43.3   | 23.70 | 23.95 | 24.33 | 23.89 | 7.23E-04  | 3.52E-01 | 2.43E-04 | 6.10E-01 | 7.43E-02 | 9.83E-01 | 3.29E-02 |
| 161.13952 | 40.44  | 17.95 | 17.34 | 16.78 | 17.52 | 1.11E-03  | 1.51E-01 | 3.54E-04 | 4.81E-01 | 2.36E-01 | 9.29E-01 | 6.97E-02 |
| 161.16482 | 46.08  | 17.71 | 15.27 | 13.70 | 16.74 | 2.65E-29  | 7.63E-13 | 3.65E-14 | 1.22E-02 | 7.12E-06 | 6.78E-05 | 7.52E-14 |
| 161.50355 | 267.23 | 17.49 | 17.44 | 17.55 | 17.62 | 8.75E-01  | 9.94E-01 | 9.94E-01 | 9.41E-01 | 9.59E-01 | 8.55E-01 | 9.89E-01 |
| 161.50929 | 114.81 | 17.09 | 17.70 | 17.02 | 17.13 | 1.63E-04  | 1.08E-03 | 9.74E-01 | 9.96E-01 | 3.10E-04 | 5.00E-03 | 9.23E-01 |
| 161.51881 | 87.73  | 15.02 | 20.40 | 20.54 | 19.05 | 1.71E-35  | 3.65E-14 | 3.65E-14 | 7.41E-14 | 9.84E-01 | 1.01E-02 | 2.91E-03 |
| 161.5392  | 32.11  | 15.03 | 15.33 | 16.43 | 15.80 | 5.47E-03  | 8.87E-01 | 3.67E-03 | 2.61E-01 | 4.44E-02 | 6.95E-01 | 4.59E-01 |
| 161.55764 | 84.71  | 18.29 | 19.83 | 20.05 | 20.11 | 8.16E-21  | 3.41E-13 | 7.45E-14 | 7.52E-14 | 6.91E-01 | 5.31E-01 | 9.91E-01 |
| 161.96281 | 101.12 | 18.60 | 16.72 | 17.57 | 16.96 | 1.43E-41  | 3.65E-14 | 7.34E-14 | 3.65E-14 | 5.79E-11 | 1.89E-01 | 7.06E-06 |
| 161.98016 | 91.14  | 21.74 | 24.60 | 24.92 | 23.98 | 8.07E-21  | 7.54E-14 | 7.49E-14 | 5.25E-10 | 7.63E-01 | 2.60E-01 | 2.80E-02 |
| 161.98711 | 280.49 | 17.14 | 16.08 | 15.91 | 15.84 | 2.04E-11  | 5.20E-07 | 3.76E-09 | 1.95E-09 | 8.30E-01 | 6.56E-01 | 9.87E-01 |
| 162.0073  | 296.12 | 19.25 | 15.82 | 16.04 | 16.60 | 1.51E-29  | 3.76E-14 | 4.59E-14 | 7.36E-14 | 8.66E-01 | 4.39E-02 | 2.29E-01 |
| 162.01099 | 104.68 | 19.35 | 22.13 | 21.54 | 20.79 | 1.24E-19  | 7.25E-14 | 4.11E-13 | 4.85E-06 | 1.64E-01 | 4.13E-05 | 4.63E-02 |
| 162.02004 | 77.38  | 20.41 | 20.90 | 21.00 | 20.26 | 6.14E-05  | 2.77E-02 | 4.42E-03 | 8.48E-01 | 9.47E-01 | 3.86E-03 | 4.95E-04 |
| 162.02184 | 196.42 | 16.80 | 17.76 | 18.49 | 18.27 | 1.92E-18  | 1.17E-06 | 7.63E-14 | 4.65E-13 | 5.85E-04 | 3.81E-02 | 6.61E-01 |
| 162.03976 | 68.72  | 16.50 | 14.72 | 15.38 | 15.84 | 1.29E-10  | 3.54E-11 | 3.91E-05 | 4.65E-02 | 4.37E-02 | 1.29E-04 | 2.77E-01 |
| 162.05494 | 267.07 | 18.48 | 16.62 | 16.36 | 16.91 | 2.03E-35  | 3.72E-14 | 3.65E-14 | 7.41E-14 | 3.31E-01 | 2.61E-01 | 3.17E-03 |
| 162.05531 | 85.59  | 18.89 | 20.23 | 20.41 | 20.52 | 1.98E-18  | 1.69E-11 | 9.80E-14 | 7.82E-14 | 7.72E-01 | 4.25E-01 | 9.32E-01 |
| 162.05873 | 57.38  | 18.94 | 19.60 | 19.71 | 18.01 | 1.74E-06  | 1.63E-01 | 6.73E-02 | 2.51E-02 | 9.84E-01 | 2.50E-05 | 4.15E-06 |
| 162.06717 | 159.62 | 17.37 | 13.72 | 13.88 | 15.15 | 8.30E-34  | 3.65E-14 | 3.65E-14 | 6.74E-13 | 9.37E-01 | 8.29E-06 | 8.59E-05 |
| 162.07598 | 276.75 | 22.79 | 21.42 | 21.26 | 21.61 | 3.32E-07  | 1.89E-05 | 1.13E-06 | 4.55E-04 | 9.50E-01 | 9.27E-01 | 6.64E-01 |
| 162.09138 | 204.41 | 16.80 | 13.42 | 13.76 | 14.45 | 3.55E-25  | 5.25E-14 | 7.33E-14 | 4.06E-12 | 6.92E-01 | 8.34E-03 | 1.37E-01 |
| 162.10362 | 154.77 | 19.08 | 16.36 | 16.77 | 17.18 | 3.46E-34  | 3.65E-14 | 3.87E-14 | 7.49E-14 | 1.60E-01 | 4.71E-04 | 1.87E-01 |
| 162.11248 | 64.92  | 29.95 | 29.51 | 29.91 | 29.88 | 5.70E-08  | 1.58E-07 | 9.53E-01 | 7.82E-01 | 3.83E-06 | 5.51E-05 | 9.74E-01 |
| 162.13993 | 38.72  | 20.27 | 19.85 | 20.34 | 19.83 | 3.52E-03  | 6.73E-02 | 9.77E-01 | 5.60E-02 | 2.78E-02 | 9.99E-01 | 2.31E-02 |
| 162.49529 | 106.4  | 18.02 | 12.16 | 12.93 | 13.25 | 1.67E-61  | 3.65E-14 | 3.65E-14 | 3.65E-14 | 2.94E-02 | 9.13E-04 | 6.55E-01 |
| 162.51154 | 184.32 | 14.31 | 14.61 | 14.69 | 13.51 | 7.86E-02  | 9.17E-01 | 8.43E-01 | 3.41E-01 | 9.98E-01 | 1.18E-01 | 7.79E-02 |
| 162.51538 | 84.1   | 15.17 | 14.80 | 13.93 | 15.32 | 1.49E-07  | 4.07E-01 | 2.51E-06 | 9.35E-01 | 2.86E-03 | 1.77E-01 | 6.32E-07 |
| 162.52002 | 268.89 | 17.14 | 17.49 | 17.53 | 17.51 | 3.55E-01  | 5.15E-01 | 3.96E-01 | 4.88E-01 | 9.98E-01 | 1.00E+00 | 1.00E+00 |
| 162.5287  | 43.04  | 17.72 | 16.02 | 18.56 | 17.39 | 3.95E-20  | 2.06E-11 | 1.79E-03 | 4.95E-01 | 6.43E-14 | 3.93E-07 | 1.51E-05 |
| 162.53374 | 76.16  | 16.39 | 9.19  | 11.02 | 10.73 | 4.24E-41  | 3.65E-14 | 3.74E-14 | 3.70E-14 | 3.70E-04 | 5.88E-03 | 9.21E-01 |
| 162.53773 | 219.69 | 15.87 | 12.66 | 14.61 | 15.87 | 2.64E-08  | 1.28E-07 | 1.02E-01 | 1.00E+00 | 3.68E-03 | 6.60E-07 | 1.36E-01 |
| 162.55714 | 84.52  | 16.58 | 15.98 | 16.44 | 16.84 | 3.07E-03  | 3.27E-02 | 9.14E-01 | 6.69E-01 | 1.73E-01 | 1.58E-03 | 3.13E-01 |
| 162.56508 | 26.59  | 15.62 | 19.45 | 13.43 | 13.75 | 4.43E-112 | 3.65E-14 | 3.65E-14 | 3.65E-14 | 3.65E-14 | 3.65E-14 | 1.26E-01 |
| 162.9473  | 94.91  | 17.13 | 11.02 | 14.51 | 11.13 | 1.28E-19  | 7.26E-14 | 5.42E-04 | 7.77E-14 | 3.78E-06 | 9.99E-01 | 1.42E-05 |
| 162.95568 | 85.08  | 15.74 | 16.53 | 16.53 | 15.89 | 2.30E-05  | 4.95E-04 | 4.59E-04 | 8.89E-01 | 1.00E+00 | 1.24E-02 | 1.20E-02 |
| 162.96751 | 26.14  | 15.96 | 14.80 | 16.31 | 15.29 | 2.83E-08  | 3.13E-05 | 4.69E-01 | 4.77E-02 | 5.95E-08 | 2.39E-01 | 6.89E-04 |
| 162.97367 | 128.11 | 16.46 | 14.34 | 15.03 | 15.01 | 1.99E-11  | 8.56E-12 | 4.05E-06 | 7.36E-06 | 8.22E-02 | 1.10E-01 | 1.00E+00 |
| 162.98093 | 90.34  | 18.56 | 21.55 | 21.99 | 20.88 | 2.04E-24  | 7.43E-14 | 5.25E-14 | 2.47E-11 | 5.18E-01 | 1.66E-01 | 4.01E-03 |
| 162.9834  | 86.59  | 13.98 | 17.90 | 18.86 | 17.69 | 2.35E-22  | 8.60E-14 | 6.56E-14 | 9.32E-13 | 1.79E-01 | 9.70E-01 | 7.38E-02 |
| 163.00296 | 27.46  | 15.90 | 15.70 | 18.02 | 16.24 | 1.97E-15  | 8.84E-01 | 1.73E-12 | 6.39E-01 | 1.70E-13 | 2.58E-01 | 1.79E-08 |
| 163.00987 | 85     | 18.29 | 16.67 | 17.76 | 17.19 | 1.22E-06  | 7.18E-07 | 2.70E-01 | 2.09E-03 | 2.29E-03 | 3.46E-01 | 2.65E-01 |
| 163.01301 | 103.23 | 15.77 | 14.82 | 14.21 | 14.74 | 3.42E-07  | 2.70E-03 | 8.23E-08 | 1.36E-03 | 1.15E-01 | 9.93E-01 | 2.26E-01 |
| 163.02655 | 70.92  | 16.59 | 18.40 | 18.59 | 17.89 | 1.93E-17  | 3.54E-13 | 7.42E-14 | 2.87E-07 | 8.24E-01 | 1.45E-01 | 1.60E-02 |
| 163.03925 | 215    | 16.95 | 16.38 | 17.19 | 17.36 | 3.75E-02  | 3.39E-01 | 8.89E-01 | 6.24E-01 | 9.37E-02 | 3.24E-02 | 9.59E-01 |
| 163.04297 | 75.89  | 14.23 | 14.93 | 15.14 | 15.02 | 9.48E-02  | 2.88E-01 | 9.56E-02 | 2.11E-01 | 9.55E-01 | 9.97E-01 | 9.92E-01 |
| 163.04573 | 299.19 | 16.37 | 13.45 | 12.69 | 15.16 | 6.18E-33  | 6.47E-14 | 3.65E-14 | 1.06E-04 | 3.48E-02 | 5.83E-08 | 8.14E-14 |
| 163.05019 | 198.6  | 16.38 | 13.79 | 13.83 | 14.57 | 1.59E-28  | 4.19E-14 | 4.30E-14 | 5.22E-13 | 9.97E-01 | 5.23E-03 | 8.84E-03 |
| 163.05345 | 49.52  | 17.90 | 15.71 | 16.12 | 16.34 | 1.21E-20  | 7.43E-14 | 1.10E-13 | 9.30E-11 | 2.49E-01 | 3.21E-02 | 7.70E-01 |
| 163.06112 | 237.29 | 16.57 | 16.89 | 16.74 | 16.32 | 4.12E-04  | 6.77E-02 | 5.44E-01 | 2.26E-01 | 6.76E-01 | 2.40E-04 | 1.08E-02 |
| 163.06158 | 43.67  | 18.92 | 20.22 | 20.46 | 17.14 | 1.86E-17  | 1.60E-03 | 8.82E-05 | 9.18E-06 | 9.05E-01 | 1.52E-13 | 7.46E-14 |
| 163.0715  | 65.57  | 17.73 | 17.45 | 17.24 | 17.47 | 1.18E-01  | 5.10E-01 | 7.00E-02 | 6.19E-01 | 7.37E-01 | 9.99E-01 | 6.72E-01 |
| 163.07528 | 288.35 | 18.45 | 17.39 | 17.54 | 17.38 | 1.06E-05  | 8.95E-05 | 8.89E-04 | 1.14E-04 | 9.33E-01 | 1.00E+00 | 9.20E-01 |
| 163.07938 | 273.36 | 19.73 | 17.44 | 16.74 | 18.04 | 1.05E-26  | 7.54E-14 | 3.72E-14 | 6.35E-10 | 2.48E-02 | 9.63E-02 | 3.99E-06 |
| 163.08389 | 141.97 | 17.70 | 20.89 | 20.85 | 20.15 | 1.51E-18  | 7.47E-14 | 7.62E-14 | 1.57E-09 | 1.00E+00 | 2.12E-01 | 2.50E-01 |
| 163.08653 | 280.49 | 17.17 | 15.38 | 15.11 | 15.74 | 5.44E-14  | 3.46E-10 | 4.66E-13 | 1.34E-06 | 7.37E-01 | 5.48E-01 | 9.38E-02 |
| 163.08662 | 23.57  | 16.97 | 14.02 | 13.84 | 14.89 | 6.43E-34  | 3.67E-14 | 3.65E-14 | 7.68E-14 | 8.65E-01 | 2.95E-03 | 1.47E-04 |
| 163.10984 | 285.04 | 15.77 | 13.76 | 14.47 | 13.68 | 2.27E-09  | 7.06E-08 | 8.91E-04 | 4.69E-08 | 1.68E-01 | 9.96E-01 | 1.16E-01 |
| 163.11574 | 61.54  | 26.13 | 25.72 | 26.32 | 26.22 | 6.42E-10  | 2.48E-05 | 1.08E-01 | 7.71E-01 | 5.65E-10 | 1.08E-06 | 6.26E-01 |

|           |        |       |       |       |       |          |          |          |          |          |          |          |
|-----------|--------|-------|-------|-------|-------|----------|----------|----------|----------|----------|----------|----------|
| 163.1328  | 289.23 | 17.58 | 16.76 | 16.68 | 16.94 | 4.22E-07 | 1.55E-05 | 1.23E-06 | 1.75E-03 | 9.64E-01 | 7.47E-01 | 4.53E-01 |
| 163.14799 | 23.68  | 17.85 | 15.43 | 16.07 | 17.02 | 5.51E-38 | 3.65E-14 | 4.50E-14 | 2.90E-06 | 4.99E-04 | 7.42E-14 | 1.14E-07 |
| 163.14807 | 288.09 | 17.93 | 16.33 | 16.54 | 16.56 | 9.79E-16 | 1.50E-13 | 4.94E-11 | 3.22E-10 | 6.92E-01 | 6.74E-01 | 1.00E+00 |
| 163.49656 | 29.94  | 12.61 | 10.64 | 16.32 | 15.08 | 5.94E-27 | 1.61E-04 | 2.37E-13 | 2.10E-06 | 3.87E-14 | 7.47E-14 | 5.42E-02 |
| 163.51445 | 71.02  | 15.89 | 15.08 | 16.67 | 15.82 | 7.68E-04 | 1.28E-01 | 1.37E-01 | 9.98E-01 | 1.97E-04 | 2.25E-01 | 1.27E-01 |
| 163.5192  | 133.43 | 18.11 | 16.61 | 17.04 | 16.76 | 1.16E-18 | 7.39E-14 | 9.57E-10 | 1.96E-13 | 4.20E-02 | 8.04E-01 | 3.37E-01 |
| 163.52782 | 91.24  | 15.66 | 16.03 | 15.98 | 15.59 | 1.16E-01 | 3.02E-01 | 4.27E-01 | 9.89E-01 | 9.95E-01 | 2.08E-01 | 3.04E-01 |
| 163.54114 | 221.34 | 13.02 | 14.57 | 15.40 | 15.64 | 5.60E-05 | 4.51E-02 | 3.87E-04 | 1.41E-04 | 5.23E-01 | 3.26E-01 | 9.81E-01 |
| 163.54616 | 66.12  | 16.98 | 15.17 | 16.15 | 15.55 | 5.18E-09 | 5.22E-09 | 1.69E-02 | 9.48E-06 | 4.77E-03 | 5.82E-01 | 1.87E-01 |
| 163.58556 | 130.41 | 13.90 | 17.45 | 17.40 | 16.72 | 9.77E-22 | 7.36E-14 | 7.35E-14 | 7.45E-12 | 9.99E-01 | 2.36E-01 | 2.83E-01 |
| 163.94001 | 102.2  | 17.53 | 15.01 | 16.01 | 15.28 | 7.03E-29 | 3.72E-14 | 4.12E-12 | 6.25E-14 | 1.67E-05 | 5.95E-01 | 4.00E-03 |
| 163.94699 | 112.79 | 13.60 | 10.30 | 13.94 | 11.92 | 1.45E-07 | 4.78E-06 | 9.52E-01 | 6.03E-02 | 7.18E-07 | 8.82E-02 | 1.79E-02 |
| 163.96883 | 74.89  | 20.15 | 20.36 | 21.03 | 20.36 | 2.74E-03 | 8.31E-01 | 1.68E-03 | 8.36E-01 | 3.46E-02 | 1.00E+00 | 4.26E-02 |
| 163.97774 | 72.56  | 24.86 | 24.46 | 24.59 | 24.42 | 9.64E-06 | 1.14E-04 | 1.31E-02 | 2.84E-05 | 5.64E-01 | 9.75E-01 | 3.30E-01 |
| 163.98437 | 103.41 | 17.38 | 17.23 | 17.62 | 17.34 | 5.67E-02 | 7.07E-01 | 3.20E-01 | 9.88E-01 | 3.69E-02 | 8.98E-01 | 2.17E-01 |
| 163.99049 | 20.64  | 18.40 | 10.00 | 10.59 | 12.69 | 3.92E-74 | 3.65E-14 | 3.65E-14 | 3.65E-14 | 2.80E-01 | 1.05E-12 | 1.79E-08 |
| 163.99575 | 95.2   | 15.49 | 14.58 | 15.47 | 14.91 | 5.05E-03 | 1.10E-02 | 1.00E+00 | 2.17E-01 | 1.65E-02 | 7.09E-01 | 2.60E-01 |
| 164.00773 | 88.2   | 19.38 | 22.66 | 21.54 | 21.83 | 2.01E-36 | 3.65E-14 | 7.43E-14 | 5.36E-14 | 3.85E-06 | 1.70E-03 | 5.66E-01 |
| 164.01313 | 125.27 | 18.20 | 14.42 | 15.12 | 14.85 | 1.70E-56 | 3.65E-14 | 3.65E-14 | 3.65E-14 | 1.75E-03 | 1.35E-01 | 5.08E-01 |
| 164.01768 | 62.63  | 16.33 | 15.22 | 15.08 | 14.97 | 3.37E-05 | 2.35E-03 | 3.58E-04 | 1.53E-04 | 9.69E-01 | 8.64E-01 | 9.86E-01 |
| 164.02934 | 60.97  | 17.26 | 14.44 | 16.39 | 15.17 | 4.99E-10 | 9.70E-10 | 1.63E-01 | 1.46E-05 | 5.44E-05 | 3.54E-01 | 3.10E-02 |
| 164.02973 | 298.38 | 15.32 | 12.77 | 12.13 | 14.04 | 1.16E-14 | 1.65E-09 | 1.23E-13 | 7.73E-03 | 3.73E-01 | 1.11E-02 | 2.52E-05 |
| 164.05152 | 86.11  | 15.06 | 15.50 | 15.64 | 15.39 | 1.10E-03 | 1.68E-02 | 6.44E-04 | 1.33E-01 | 8.07E-01 | 8.96E-01 | 3.90E-01 |
| 164.05578 | 72.68  | 18.48 | 18.15 | 18.04 | 17.54 | 5.06E-04 | 3.97E-01 | 1.67E-01 | 1.37E-04 | 9.66E-01 | 3.67E-02 | 1.08E-01 |
| 164.06619 | 24.73  | 12.80 | 14.16 | 14.93 | 13.59 | 1.70E-09 | 1.45E-04 | 4.79E-10 | 7.25E-02 | 7.97E-02 | 3.25E-01 | 3.94E-04 |
| 164.07059 | 279.49 | 17.53 | 15.62 | 15.80 | 16.24 | 6.17E-14 | 1.40E-12 | 7.03E-11 | 3.25E-06 | 8.96E-01 | 8.43E-02 | 3.20E-01 |
| 164.08224 | 278.73 | 17.98 | 15.70 | 15.48 | 16.10 | 3.77E-21 | 7.39E-14 | 7.49E-14 | 3.44E-11 | 8.44E-01 | 4.33E-01 | 9.57E-02 |
| 164.08281 | 169.82 | 18.79 | 15.75 | 15.16 | 16.24 | 4.05E-45 | 3.65E-14 | 3.65E-14 | 4.01E-14 | 3.33E-02 | 1.23E-01 | 1.08E-05 |
| 164.09163 | 287.23 | 21.05 | 19.94 | 19.88 | 20.69 | 1.57E-03 | 9.11E-03 | 4.43E-03 | 7.53E-01 | 9.98E-01 | 1.77E-01 | 1.17E-01 |
| 164.10122 | 292.77 | 17.17 | 16.86 | 17.12 | 15.67 | 2.43E-08 | 5.88E-01 | 9.97E-01 | 8.96E-08 | 7.25E-01 | 6.26E-05 | 4.59E-07 |
| 164.107   | 179.32 | 17.06 | 14.70 | 14.84 | 14.76 | 3.04E-37 | 3.65E-14 | 3.65E-14 | 3.65E-14 | 8.54E-01 | 9.86E-01 | 9.73E-01 |
| 164.11112 | 127.33 | 15.30 | 17.36 | 17.28 | 16.80 | 5.34E-11 | 1.47E-09 | 4.58E-09 | 2.92E-05 | 9.94E-01 | 3.11E-01 | 4.44E-01 |
| 164.11282 | 40.74  | 17.50 | 15.98 | 16.47 | 16.46 | 9.04E-12 | 4.00E-12 | 2.61E-06 | 4.86E-06 | 7.58E-02 | 1.02E-01 | 1.00E+00 |
| 164.11773 | 64.41  | 22.64 | 22.52 | 23.20 | 22.75 | 1.89E-11 | 5.14E-01 | 2.15E-08 | 6.40E-01 | 3.20E-11 | 7.17E-02 | 3.39E-05 |
| 164.12807 | 198.64 | 15.99 | 14.11 | 14.36 | 14.85 | 4.22E-17 | 7.45E-14 | 9.76E-13 | 1.49E-06 | 6.45E-01 | 5.34E-03 | 1.19E-01 |
| 164.1281  | 21.78  | 15.69 | 12.38 | 12.17 | 12.95 | 9.25E-33 | 3.74E-14 | 3.65E-14 | 7.43E-14 | 8.79E-01 | 1.95E-01 | 3.40E-02 |
| 164.50882 | 254.14 | 16.99 | 17.87 | 18.52 | 17.84 | 2.36E-11 | 9.47E-05 | 2.21E-12 | 2.74E-04 | 9.11E-03 | 9.99E-01 | 7.42E-03 |
| 164.52623 | 106.55 | 16.25 | 15.54 | 15.53 | 15.28 | 8.07E-04 | 1.91E-02 | 1.67E-02 | 7.36E-04 | 1.00E+00 | 7.46E-01 | 7.51E-01 |
| 164.53097 | 83.96  | 18.17 | 22.37 | 22.41 | 21.54 | 2.74E-59 | 3.65E-14 | 3.65E-14 | 3.65E-14 | 9.97E-01 | 1.21E-03 | 5.23E-04 |
| 164.56624 | 115.58 | 13.94 | 14.75 | 14.76 | 14.63 | 2.57E-03 | 7.72E-03 | 6.09E-03 | 3.88E-02 | 1.00E+00 | 9.70E-01 | 9.61E-01 |
| 164.92996 | 108.56 | 13.78 | 16.42 | 12.24 | 15.74 | 1.44E-11 | 4.43E-05 | 3.65E-02 | 5.73E-03 | 1.03E-10 | 6.82E-01 | 1.35E-07 |
| 164.93505 | 40.3   | 18.72 | 20.58 | 20.83 | 20.88 | 2.30E-27 | 7.39E-14 | 5.63E-14 | 6.03E-14 | 5.68E-01 | 4.41E-01 | 9.95E-01 |
| 164.97719 | 53.76  | 17.26 | 15.27 | 16.12 | 15.48 | 8.16E-27 | 3.96E-14 | 4.16E-10 | 7.12E-14 | 7.43E-06 | 6.13E-01 | 1.98E-03 |
| 164.98206 | 60.01  | 19.45 | 17.81 | 18.58 | 17.99 | 7.93E-36 | 3.65E-14 | 2.39E-12 | 3.70E-14 | 1.26E-09 | 4.55E-01 | 6.52E-06 |
| 165.0008  | 276.46 | 17.63 | 19.10 | 19.73 | 18.77 | 4.61E-27 | 7.34E-14 | 3.67E-14 | 1.06E-09 | 1.55E-03 | 2.28E-01 | 5.33E-07 |
| 165.00703 | 30.99  | 13.43 | 14.18 | 17.10 | 15.62 | 3.14E-13 | 3.68E-01 | 6.43E-13 | 4.41E-05 | 2.73E-08 | 2.03E-02 | 1.51E-02 |
| 165.01288 | 72.4   | 18.44 | 16.79 | 15.90 | 16.19 | 3.44E-15 | 1.00E-06 | 1.04E-13 | 5.69E-11 | 2.36E-02 | 2.43E-01 | 8.02E-01 |
| 165.03129 | 85.98  | 15.28 | 18.38 | 18.56 | 17.68 | 9.96E-33 | 3.72E-14 | 3.65E-14 | 7.32E-14 | 9.05E-01 | 4.16E-02 | 5.31E-03 |
| 165.05091 | 86.16  | 14.99 | 16.28 | 16.31 | 16.62 | 1.52E-06 | 2.68E-04 | 1.55E-04 | 4.58E-06 | 1.00E+00 | 7.46E-01 | 7.92E-01 |
| 165.05456 | 54.39  | 24.54 | 23.79 | 24.11 | 23.79 | 2.25E-16 | 1.43E-13 | 1.41E-05 | 2.44E-13 | 4.31E-03 | 1.00E+00 | 4.56E-03 |
| 165.06588 | 158.46 | 17.62 | 15.08 | 15.31 | 16.19 | 2.42E-41 | 3.65E-14 | 3.65E-14 | 7.76E-14 | 5.23E-01 | 3.39E-09 | 2.56E-06 |
| 165.09088 | 23.11  | 17.70 | 15.03 | 15.85 | 16.00 | 1.77E-44 | 3.65E-14 | 3.67E-14 | 5.18E-14 | 7.71E-07 | 1.54E-08 | 7.83E-01 |
| 165.09093 | 292.97 | 18.21 | 16.89 | 17.00 | 17.03 | 7.23E-09 | 1.39E-07 | 1.25E-06 | 5.55E-06 | 9.64E-01 | 9.38E-01 | 9.99E-01 |
| 165.0951  | 168.7  | 18.28 | 15.47 | 15.05 | 15.99 | 5.25E-39 | 3.65E-14 | 3.65E-14 | 6.85E-14 | 2.11E-01 | 9.29E-02 | 1.79E-04 |
| 165.1024  | 182.43 | 16.89 | 14.01 | 14.42 | 15.09 | 2.92E-38 | 3.65E-14 | 3.65E-14 | 7.56E-14 | 1.36E-01 | 8.75E-07 | 4.99E-03 |
| 165.1199  | 40.6   | 18.01 | 16.99 | 17.82 | 17.55 | 1.47E-16 | 7.45E-14 | 3.27E-01 | 4.44E-04 | 2.28E-11 | 1.79E-05 | 9.29E-02 |
| 165.12251 | 217.86 | 15.40 | 10.33 | 10.77 | 10.15 | 1.30E-21 | 7.55E-14 | 8.25E-14 | 7.47E-14 | 8.58E-01 | 9.90E-01 | 7.01E-01 |
| 165.1273  | 21.83  | 17.40 | 14.43 | 15.47 | 15.72 | 4.71E-47 | 3.65E-14 | 3.67E-14 | 6.85E-14 | 1.99E-09 | 1.00E-12 | 4.28E-01 |
| 165.12732 | 289.67 | 17.66 | 16.78 | 16.81 | 16.69 | 3.12E-03 | 1.61E-02 | 1.92E-02 | 7.59E-03 | 1.00E+00 | 9.90E-01 | 9.79E-01 |
| 165.16366 | 23.09  | 16.41 | 12.37 | 13.38 | 14.04 | 3.67E-49 | 3.65E-14 | 3.65E-14 | 5.72E-14 | 2.13E-05 | 6.37E-12 | 1.63E-02 |
| 165.16378 | 178.75 | 17.15 | 14.42 | 14.63 | 15.23 | 3.17E-45 | 3.65E-14 | 3.65E-14 | 4.54E-14 | 5.99E-01 | 2.62E-05 | 2.80E-03 |
| 165.51296 | 94.62  | 12.45 | 15.01 | 15.23 | 14.22 | 3.51E-08 | 1.80E-06 | 1.37E-07 | 2.56E-03 | 9.70E-01 | 4.14E-01 | 1.94E-01 |
| 165.52358 | 84.87  | 17.64 | 12.77 | 11.58 | 15.27 | 1.71E-49 | 3.65E-14 | 3.65E-14 | 9.35E-11 | 2.56E-03 | 3.22E-11 | 6.38E-14 |
| 165.52992 | 86.2   | 16.34 | 19.86 | 19.99 | 19.14 | 3.08E-59 | 3.65E-14 | 3.65E-14 | 3.65E-14 | 8.84E-01 | 1.02E-03 | 4.99E-05 |
| 165.53378 | 82.9   | 16.93 | 18.05 | 18.30 | 17.96 | 1.08E-11 | 7.51E-08 | 3.52E-11 | 1.73E-06 | 5.87E-01 | 9.69E-01 | 3.30E-01 |
| 165.54376 | 71.81  | 16.45 | 14.99 | 16.59 | 15.68 | 4.81E-08 | 2.05E-06 | 9.56E-01 | 3.82E-02 | 3.24E-07 | 8.86E-02 | 1.11E-02 |
| 165.55286 | 84.98  | 15.78 | 17.67 | 17.21 | 16.73 | 1.89E-21 | 6.43E-14 | 1.82E-13 | 2.17E-06 | 5.16E-02 | 4.46E-06 | 4.56E-02 |
| 165.57232 | 24.41  | 14.22 | 14.25 | 12.30 | 16.07 | 2.63E-15 | 1.00E+00 | 7.35E-06 | 3.35E-05 | 1.03E-05 | 9.01E-05 | 7.56E-14 |

|           |        |       |       |       |       |          |          |          |          |          |          |          |
|-----------|--------|-------|-------|-------|-------|----------|----------|----------|----------|----------|----------|----------|
| 165.96611 | 46.96  | 18.03 | 15.36 | 17.01 | 15.25 | 1.44E-15 | 3.07E-12 | 1.66E-02 | 1.68E-12 | 3.90E-05 | 9.92E-01 | 1.77E-05 |
| 165.97479 | 65.69  | 21.56 | 20.81 | 21.31 | 20.78 | 4.08E-16 | 2.58E-12 | 4.70E-02 | 1.05E-12 | 6.82E-06 | 9.86E-01 | 2.41E-06 |
| 165.98284 | 280.01 | 20.42 | 17.13 | 16.63 | 17.99 | 5.63E-24 | 7.44E-14 | 5.47E-14 | 3.11E-10 | 4.96E-01 | 8.54E-02 | 1.21E-03 |
| 165.98291 | 164.53 | 18.39 | 15.78 | 15.27 | 17.09 | 4.07E-26 | 7.36E-14 | 4.16E-14 | 2.52E-05 | 2.41E-01 | 3.85E-05 | 3.34E-09 |
| 165.99097 | 185.46 | 18.19 | 13.95 | 13.59 | 15.59 | 3.89E-43 | 3.65E-14 | 3.65E-14 | 7.38E-14 | 6.07E-01 | 7.58E-07 | 9.75E-10 |
| 165.99918 | 87.12  | 11.51 | 11.65 | 14.89 | 13.41 | 3.38E-09 | 9.94E-01 | 3.29E-08 | 6.09E-03 | 3.45E-07 | 1.80E-02 | 6.30E-02 |
| 166.00193 | 83.72  | 16.45 | 17.72 | 17.50 | 17.63 | 1.74E-13 | 1.06E-11 | 1.24E-08 | 7.99E-10 | 5.92E-01 | 9.53E-01 | 8.99E-01 |
| 166.03353 | 76.9   | 13.25 | 15.15 | 15.04 | 16.35 | 5.24E-13 | 2.93E-06 | 9.95E-06 | 1.72E-13 | 9.91E-01 | 1.21E-02 | 4.29E-03 |
| 166.04985 | 285.13 | 17.92 | 16.50 | 16.53 | 16.43 | 9.43E-11 | 3.99E-08 | 5.79E-08 | 2.15E-08 | 9.99E-01 | 9.94E-01 | 9.81E-01 |
| 166.05792 | 62.23  | 21.03 | 20.26 | 20.68 | 20.21 | 6.32E-16 | 1.36E-12 | 2.50E-03 | 3.44E-13 | 2.38E-04 | 9.72E-01 | 5.81E-05 |
| 166.06268 | 85.59  | 17.84 | 18.16 | 18.11 | 17.69 | 1.16E-04 | 1.97E-02 | 6.84E-02 | 5.63E-01 | 9.65E-01 | 4.51E-04 | 2.22E-03 |
| 166.07237 | 50.18  | 18.76 | 18.47 | 18.52 | 18.52 | 8.97E-02 | 9.10E-02 | 2.18E-01 | 2.54E-01 | 9.75E-01 | 9.74E-01 | 1.00E+00 |
| 166.0806  | 205.91 | 15.90 | 9.78  | 10.71 | 9.46  | 1.40E-31 | 3.87E-14 | 7.03E-14 | 3.72E-14 | 2.80E-01 | 9.29E-01 | 8.80E-02 |
| 166.08414 | 50.19  | 20.94 | 22.29 | 20.82 | 20.97 | 4.01E-09 | 3.15E-07 | 9.60E-01 | 1.00E+00 | 5.23E-08 | 2.42E-06 | 9.41E-01 |
| 166.0862  | 47.97  | 26.82 | 25.69 | 26.10 | 26.20 | 3.61E-33 | 3.65E-14 | 7.49E-14 | 6.59E-13 | 1.77E-06 | 7.40E-09 | 6.01E-01 |
| 166.09835 | 290.13 | 18.70 | 17.58 | 17.59 | 17.66 | 7.74E-05 | 5.57E-04 | 5.12E-04 | 2.17E-03 | 1.00E+00 | 9.94E-01 | 9.95E-01 |
| 166.12259 | 170.03 | 17.23 | 14.94 | 15.19 | 15.78 | 1.69E-32 | 3.65E-14 | 3.87E-14 | 1.42E-13 | 4.81E-01 | 3.36E-05 | 6.28E-03 |
| 166.4497  | 118.49 | 17.54 | 15.35 | 16.91 | 15.22 | 3.23E-13 | 8.88E-10 | 2.00E-01 | 2.45E-10 | 3.33E-05 | 9.81E-01 | 9.74E-06 |
| 166.51894 | 31.56  | 14.88 | 16.22 | 16.68 | 16.56 | 4.03E-10 | 1.80E-05 | 3.70E-09 | 1.14E-07 | 3.91E-01 | 6.71E-01 | 9.78E-01 |
| 166.52472 | 82.15  | 18.77 | 18.91 | 19.53 | 18.85 | 9.85E-03 | 9.47E-01 | 1.04E-02 | 9.92E-01 | 6.32E-02 | 9.95E-01 | 3.96E-02 |
| 166.53258 | 81.15  | 15.37 | 15.82 | 15.97 | 15.64 | 7.17E-02 | 2.34E-01 | 5.25E-02 | 6.75E-01 | 9.20E-01 | 8.98E-01 | 5.48E-01 |
| 166.53798 | 94.39  | 14.76 | 15.33 | 15.52 | 14.74 | 3.33E-05 | 1.55E-02 | 3.69E-04 | 1.00E+00 | 7.46E-01 | 2.06E-02 | 6.86E-04 |
| 166.54259 | 275.85 | 16.21 | 18.74 | 19.27 | 17.34 | 1.45E-18 | 2.27E-12 | 7.49E-14 | 5.20E-03 | 3.99E-01 | 4.02E-04 | 3.44E-07 |
| 166.93307 | 40.31  | 16.10 | 17.22 | 17.52 | 17.66 | 3.39E-12 | 2.21E-06 | 1.20E-09 | 1.19E-10 | 5.42E-01 | 2.29E-01 | 9.26E-01 |
| 166.95065 | 41.13  | 21.30 | 23.34 | 23.53 | 23.28 | 5.81E-45 | 3.65E-14 | 3.65E-14 | 3.65E-14 | 5.60E-01 | 9.69E-01 | 3.09E-01 |
| 166.95429 | 269.57 | 17.70 | 11.25 | 11.80 | 12.96 | 1.01E-73 | 3.65E-14 | 3.65E-14 | 3.65E-14 | 1.43E-01 | 3.48E-09 | 8.06E-05 |
| 166.95906 | 86.87  | 15.20 | 16.54 | 16.93 | 15.99 | 6.74E-06 | 6.82E-04 | 4.84E-06 | 1.11E-01 | 6.99E-01 | 4.32E-01 | 5.07E-02 |
| 166.99437 | 58.13  | 18.32 | 13.55 | 14.41 | 13.83 | 1.96E-29 | 3.87E-14 | 7.61E-14 | 5.74E-14 | 1.44E-01 | 9.06E-01 | 4.98E-01 |
| 167.01274 | 273.19 | 21.63 | 19.66 | 19.82 | 20.17 | 1.07E-12 | 2.79E-11 | 5.84E-10 | 1.73E-06 | 9.41E-01 | 2.86E-01 | 6.02E-01 |
| 167.01894 | 86.46  | 15.19 | 16.02 | 16.38 | 15.98 | 4.98E-08 | 1.57E-04 | 2.02E-08 | 5.50E-04 | 2.89E-01 | 9.97E-01 | 2.20E-01 |
| 167.02177 | 67.48  | 18.17 | 18.07 | 18.14 | 17.95 | 6.20E-01 | 9.41E-01 | 9.97E-01 | 5.82E-01 | 9.84E-01 | 8.99E-01 | 7.21E-01 |
| 167.03145 | 48.28  | 16.03 | 17.95 | 17.00 | 16.24 | 5.19E-17 | 7.41E-14 | 3.72E-05 | 7.76E-01 | 1.06E-04 | 3.88E-12 | 3.93E-03 |
| 167.03377 | 24.61  | 18.03 | 15.30 | 15.26 | 15.11 | 1.17E-36 | 3.67E-14 | 3.65E-14 | 3.65E-14 | 9.97E-01 | 8.37E-01 | 9.16E-01 |
| 167.03378 | 293.18 | 18.30 | 18.40 | 18.15 | 17.42 | 3.55E-02 | 9.93E-01 | 9.70E-01 | 5.91E-02 | 8.98E-01 | 3.72E-02 | 1.76E-01 |
| 167.03896 | 63.25  | 14.61 | 17.47 | 16.66 | 17.59 | 7.75E-13 | 1.28E-10 | 4.34E-06 | 6.86E-11 | 2.06E-01 | 9.92E-01 | 1.29E-01 |
| 167.05262 | 71.57  | 14.92 | 14.77 | 15.42 | 15.66 | 1.76E-01 | 9.87E-01 | 6.41E-01 | 3.45E-01 | 4.58E-01 | 2.18E-01 | 9.56E-01 |
| 167.05631 | 188.48 | 16.25 | 14.30 | 14.48 | 15.46 | 8.03E-27 | 4.67E-14 | 6.94E-14 | 5.19E-05 | 7.34E-01 | 4.95E-09 | 7.18E-07 |
| 167.05682 | 72.97  | 18.44 | 17.92 | 19.19 | 19.39 | 2.06E-26 | 2.10E-04 | 1.88E-08 | 8.85E-12 | 7.25E-14 | 5.12E-14 | 4.31E-01 |
| 167.06147 | 65.47  | 16.74 | 16.68 | 16.64 | 16.21 | 3.89E-01 | 9.98E-01 | 9.87E-01 | 3.64E-01 | 9.99E-01 | 5.01E-01 | 5.78E-01 |
| 167.07023 | 274.56 | 17.91 | 16.52 | 16.51 | 16.73 | 6.46E-09 | 2.63E-07 | 1.68E-07 | 2.68E-05 | 1.00E+00 | 8.55E-01 | 8.37E-01 |
| 167.08142 | 280.79 | 18.55 | 16.61 | 16.45 | 16.57 | 1.87E-22 | 7.49E-14 | 7.34E-14 | 7.39E-14 | 8.85E-01 | 9.98E-01 | 9.48E-01 |
| 167.08956 | 49.08  | 23.37 | 22.40 | 22.76 | 22.71 | 2.42E-24 | 3.94E-14 | 6.78E-12 | 6.29E-13 | 1.37E-04 | 2.77E-03 | 9.15E-01 |
| 167.09269 | 281.27 | 17.89 | 16.85 | 16.79 | 16.67 | 3.33E-06 | 2.91E-04 | 9.63E-05 | 2.41E-05 | 9.96E-01 | 9.07E-01 | 9.67E-01 |
| 167.10655 | 22.92  | 17.76 | 15.22 | 16.10 | 16.59 | 3.95E-25 | 3.74E-14 | 3.16E-13 | 6.80E-07 | 2.74E-04 | 1.13E-08 | 1.08E-01 |
| 167.10658 | 289.93 | 18.53 | 17.24 | 17.33 | 17.39 | 3.14E-07 | 3.14E-06 | 1.47E-05 | 8.34E-05 | 9.83E-01 | 9.39E-01 | 9.96E-01 |
| 167.11783 | 191.47 | 16.33 | 12.31 | 12.80 | 13.85 | 3.01E-24 | 5.63E-14 | 7.47E-14 | 1.02E-09 | 5.49E-01 | 4.86E-04 | 3.25E-02 |
| 167.14296 | 21.11  | 17.41 | 14.60 | 15.38 | 15.62 | 1.25E-40 | 3.65E-14 | 3.76E-14 | 7.14E-14 | 5.23E-05 | 1.90E-07 | 5.34E-01 |
| 167.14296 | 288.6  | 17.86 | 16.80 | 16.75 | 16.90 | 1.38E-05 | 1.73E-04 | 7.22E-05 | 1.36E-03 | 9.98E-01 | 9.77E-01 | 9.41E-01 |
| 167.15432 | 128.81 | 16.35 | 18.41 | 18.41 | 17.84 | 2.87E-11 | 1.90E-09 | 1.13E-09 | 3.33E-05 | 1.00E+00 | 3.19E-01 | 2.97E-01 |
| 167.4662  | 107.23 | 14.54 | 15.72 | 15.36 | 14.53 | 2.19E-02 | 4.55E-02 | 2.62E-01 | 1.00E+00 | 8.57E-01 | 6.17E-02 | 2.99E-01 |
| 167.47043 | 117.12 | 16.25 | 10.32 | 13.23 | 11.60 | 1.25E-24 | 4.19E-14 | 4.31E-08 | 7.47E-14 | 3.64E-07 | 8.40E-02 | 1.28E-02 |
| 167.48727 | 106.62 | 16.50 | 14.49 | 14.02 | 14.51 | 8.22E-11 | 4.80E-07 | 3.15E-10 | 1.33E-06 | 5.91E-01 | 1.00E+00 | 5.71E-01 |
| 167.50973 | 30.32  | 15.05 | 12.74 | 16.66 | 15.96 | 9.28E-25 | 9.88E-11 | 6.90E-06 | 3.56E-02 | 4.16E-14 | 7.53E-14 | 1.69E-01 |
| 167.53235 | 62.8   | 16.39 | 15.60 | 16.00 | 15.72 | 2.27E-02 | 2.10E-02 | 4.77E-01 | 7.84E-02 | 4.73E-01 | 9.77E-01 | 7.51E-01 |
| 167.54108 | 85.22  | 19.28 | 21.81 | 21.34 | 21.05 | 2.10E-20 | 7.25E-14 | 1.17E-13 | 2.85E-10 | 2.64E-01 | 2.23E-02 | 6.74E-01 |
| 167.5752  | 64.97  | 13.91 | 10.40 | 13.91 | 16.07 | 1.73E-46 | 3.70E-14 | 1.00E+00 | 1.02E-11 | 3.76E-14 | 3.65E-14 | 2.83E-11 |
| 167.95411 | 41.59  | 16.30 | 17.89 | 18.03 | 17.65 | 1.25E-21 | 7.29E-14 | 7.23E-14 | 4.95E-12 | 8.55E-01 | 5.64E-01 | 1.59E-01 |
| 167.96336 | 281.12 | 16.76 | 12.97 | 11.54 | 12.62 | 7.62E-20 | 3.77E-11 | 7.23E-14 | 2.39E-12 | 4.08E-02 | 9.24E-01 | 2.03E-01 |
| 167.96405 | 20.32  | 15.58 | 12.03 | 12.10 | 13.76 | 3.23E-15 | 8.08E-13 | 1.32E-12 | 5.91E-04 | 9.99E-01 | 1.94E-03 | 2.97E-03 |
| 167.97436 | 51.52  | 17.65 | 8.57  | 9.08  | 10.39 | 5.23E-82 | 3.65E-14 | 3.65E-14 | 3.65E-14 | 4.15E-01 | 1.38E-06 | 7.86E-04 |
| 167.98634 | 29.14  | 16.34 | 12.52 | 13.18 | 13.66 | 3.56E-62 | 3.65E-14 | 3.65E-14 | 3.65E-14 | 9.78E-04 | 5.26E-09 | 3.41E-02 |
| 167.998   | 32.42  | 14.59 | 16.59 | 16.98 | 16.70 | 1.36E-14 | 1.69E-09 | 5.59E-13 | 5.78E-10 | 5.89E-01 | 9.86E-01 | 8.16E-01 |
| 168.00604 | 275.98 | 18.21 | 19.73 | 19.97 | 19.40 | 1.44E-10 | 1.08E-07 | 4.45E-10 | 8.08E-05 | 7.98E-01 | 6.21E-01 | 1.53E-01 |
| 168.01617 | 264.84 | 17.47 | 11.76 | 11.26 | 12.93 | 1.36E-32 | 3.85E-14 | 3.65E-14 | 7.36E-14 | 7.29E-01 | 9.02E-02 | 4.74E-03 |
| 168.02479 | 32.49  | 15.02 | 13.91 | 13.25 | 14.13 | 1.15E-08 | 3.28E-04 | 1.82E-09 | 8.17E-03 | 8.56E-02 | 8.70E-01 | 1.22E-02 |
| 168.03256 | 113.43 | 14.98 | 14.46 | 14.87 | 15.14 | 3.60E-01 | 5.07E-01 | 9.90E-01 | 9.75E-01 | 7.14E-01 | 3.17E-01 | 8.98E-01 |
| 168.04229 | 77.32  | 17.55 | 18.22 | 17.89 | 18.18 | 1.03E-02 | 1.37E-02 | 4.06E-01 | 3.01E-02 | 4.57E-01 | 9.98E-01 | 5.97E-01 |
| 168.04915 | 72.2   | 17.68 | 17.11 | 18.66 | 18.93 | 4.12E-25 | 2.36E-03 | 1.42E-08 | 3.13E-12 | 7.63E-14 | 6.38E-14 | 3.63E-01 |

|           |        |       |       |       |       |          |          |          |          |          |          |          |
|-----------|--------|-------|-------|-------|-------|----------|----------|----------|----------|----------|----------|----------|
| 168.05746 | 71.38  | 14.74 | 11.84 | 15.42 | 15.38 | 6.11E-15 | 1.88E-09 | 4.05E-01 | 4.82E-01 | 6.68E-13 | 4.73E-12 | 1.00E+00 |
| 168.06542 | 289.38 | 18.66 | 17.57 | 17.63 | 17.54 | 3.89E-06 | 6.70E-05 | 1.73E-04 | 6.72E-05 | 9.94E-01 | 1.00E+00 | 9.83E-01 |
| 168.07672 | 276.43 | 17.98 | 16.65 | 16.41 | 16.62 | 9.88E-19 | 1.67E-12 | 7.46E-14 | 1.96E-12 | 5.19E-01 | 9.98E-01 | 6.47E-01 |
| 168.08064 | 37.44  | 17.35 | 15.27 | 15.91 | 17.01 | 2.52E-10 | 1.87E-09 | 4.06E-05 | 7.26E-01 | 1.98E-01 | 2.47E-06 | 5.57E-03 |
| 168.08075 | 190.81 | 16.57 | 13.73 | 14.09 | 14.35 | 4.06E-41 | 3.65E-14 | 3.65E-14 | 3.87E-14 | 2.16E-01 | 7.89E-03 | 5.24E-01 |
| 168.09053 | 40.07  | 18.31 | 16.82 | 17.25 | 17.28 | 2.04E-38 | 3.65E-14 | 4.56E-14 | 6.43E-14 | 7.53E-05 | 3.28E-05 | 9.86E-01 |
| 168.09623 | 159.4  | 17.93 | 16.17 | 16.54 | 16.39 | 1.51E-22 | 7.12E-14 | 1.27E-13 | 7.67E-14 | 1.37E-01 | 5.94E-01 | 8.33E-01 |
| 168.1018  | 282.79 | 17.02 | 16.01 | 15.99 | 15.99 | 3.34E-08 | 3.29E-06 | 1.49E-06 | 4.24E-06 | 9.99E-01 | 1.00E+00 | 1.00E+00 |
| 168.10188 | 141.32 | 18.27 | 16.31 | 17.11 | 16.51 | 4.23E-22 | 7.07E-14 | 1.22E-08 | 7.36E-14 | 2.39E-04 | 7.40E-01 | 1.33E-02 |
| 168.11318 | 68.2   | 14.56 | 15.65 | 15.45 | 15.85 | 5.66E-03 | 2.42E-02 | 9.25E-02 | 6.74E-03 | 9.53E-01 | 9.64E-01 | 7.54E-01 |
| 168.13828 | 197.06 | 16.54 | 13.97 | 14.23 | 14.55 | 9.86E-36 | 3.65E-14 | 3.67E-14 | 6.78E-14 | 5.06E-01 | 1.53E-02 | 3.37E-01 |
| 168.44451 | 77.1   | 15.01 | 17.53 | 17.37 | 17.00 | 4.70E-25 | 6.16E-14 | 7.28E-14 | 1.11E-13 | 9.02E-01 | 1.36E-01 | 4.32E-01 |
| 168.4861  | 91.36  | 16.12 | 8.95  | 9.59  | 9.95  | 2.47E-85 | 3.65E-14 | 3.65E-14 | 3.65E-14 | 5.17E-02 | 8.00E-04 | 5.03E-01 |
| 168.5083  | 86.28  | 16.91 | 19.12 | 19.44 | 18.64 | 3.94E-22 | 7.49E-14 | 6.85E-14 | 2.06E-10 | 5.75E-01 | 2.48E-01 | 1.07E-02 |
| 168.53979 | 84.67  | 17.95 | 18.42 | 18.00 | 18.12 | 3.82E-02 | 3.46E-02 | 9.94E-01 | 7.63E-01 | 7.74E-02 | 3.64E-01 | 8.92E-01 |
| 168.54255 | 84.92  | 16.63 | 16.04 | 16.64 | 16.59 | 2.08E-03 | 5.09E-03 | 1.00E+00 | 9.96E-01 | 5.30E-03 | 1.81E-02 | 9.92E-01 |
| 168.55772 | 28.15  | 17.18 | 20.10 | 20.10 | 20.37 | 8.55E-42 | 3.65E-14 | 3.65E-14 | 3.65E-14 | 1.00E+00 | 5.96E-01 | 5.90E-01 |
| 168.94878 | 40.98  | 18.51 | 20.40 | 20.69 | 20.30 | 6.14E-36 | 3.74E-14 | 3.65E-14 | 5.05E-14 | 2.67E-01 | 9.12E-01 | 7.30E-02 |
| 168.99244 | 35.42  | 16.39 | 15.47 | 16.76 | 15.86 | 3.83E-04 | 1.68E-02 | 6.17E-01 | 3.29E-01 | 3.55E-04 | 6.45E-01 | 2.79E-02 |
| 169.00869 | 87.37  | 14.28 | 15.44 | 15.76 | 15.19 | 4.48E-04 | 8.13E-03 | 2.90E-04 | 7.10E-02 | 8.24E-01 | 9.11E-01 | 4.34E-01 |
| 169.02704 | 52.85  | 20.30 | 19.34 | 19.19 | 18.12 | 1.16E-14 | 3.52E-04 | 2.16E-05 | 7.42E-14 | 9.31E-01 | 1.25E-05 | 1.35E-04 |
| 169.03561 | 76.07  | 21.12 | 20.40 | 21.37 | 21.36 | 1.32E-07 | 2.77E-04 | 4.54E-01 | 5.35E-01 | 6.99E-07 | 2.43E-06 | 1.00E+00 |
| 169.04536 | 272.48 | 18.34 | 20.60 | 20.33 | 19.71 | 1.27E-07 | 3.21E-07 | 6.73E-06 | 5.72E-03 | 9.13E-01 | 1.57E-01 | 4.54E-01 |
| 169.05871 | 63.6   | 21.67 | 21.82 | 21.78 | 21.65 | 7.76E-01 | 8.57E-01 | 9.38E-01 | 9.99E-01 | 9.96E-01 | 8.13E-01 | 9.04E-01 |
| 169.07593 | 284.67 | 18.59 | 16.44 | 16.31 | 16.45 | 3.01E-25 | 7.24E-14 | 6.87E-14 | 7.45E-14 | 9.45E-01 | 1.00E+00 | 9.33E-01 |
| 169.08022 | 98.27  | 16.64 | 14.96 | 14.88 | 14.91 | 1.80E-13 | 8.65E-10 | 8.06E-11 | 6.68E-10 | 9.87E-01 | 9.97E-01 | 9.99E-01 |
| 169.08584 | 290.41 | 18.39 | 17.16 | 17.18 | 17.13 | 1.04E-06 | 3.19E-05 | 3.65E-05 | 3.40E-05 | 1.00E+00 | 1.00E+00 | 9.98E-01 |
| 169.09502 | 79.39  | 15.38 | 14.96 | 16.10 | 15.15 | 1.72E-03 | 4.90E-01 | 7.35E-02 | 8.66E-01 | 1.34E-03 | 9.35E-01 | 1.35E-02 |
| 169.09708 | 289.81 | 16.87 | 16.15 | 15.98 | 15.94 | 8.96E-05 | 7.51E-03 | 4.68E-04 | 3.94E-04 | 8.88E-01 | 8.17E-01 | 9.98E-01 |
| 169.10103 | 23.57  | 15.82 | 11.00 | 12.87 | 14.44 | 3.93E-20 | 7.21E-14 | 4.35E-09 | 2.11E-02 | 5.63E-04 | 1.33E-10 | 7.45E-03 |
| 169.10668 | 194.26 | 17.62 | 14.63 | 15.10 | 15.34 | 1.52E-44 | 3.65E-14 | 3.65E-14 | 3.67E-14 | 4.89E-02 | 1.04E-03 | 5.60E-01 |
| 169.12221 | 286.81 | 17.53 | 16.28 | 16.23 | 16.46 | 2.25E-11 | 5.30E-09 | 8.96E-10 | 1.36E-06 | 9.95E-01 | 8.19E-01 | 6.77E-01 |
| 169.15866 | 193.73 | 16.13 | 13.74 | 14.15 | 13.93 | 6.39E-12 | 2.09E-10 | 1.15E-07 | 1.19E-08 | 6.46E-01 | 9.54E-01 | 9.27E-01 |
| 169.16995 | 168.77 | 12.63 | 15.03 | 14.24 | 15.09 | 3.80E-09 | 9.10E-08 | 5.53E-04 | 8.78E-08 | 2.33E-01 | 9.99E-01 | 1.90E-01 |
| 169.48969 | 269.06 | 16.56 | 14.75 | 14.67 | 15.99 | 1.04E-03 | 6.40E-03 | 3.42E-03 | 7.44E-01 | 9.99E-01 | 1.48E-01 | 1.03E-01 |
| 169.50743 | 106.89 | 17.80 | 17.63 | 18.14 | 17.49 | 8.49E-02 | 9.16E-01 | 5.16E-01 | 6.30E-01 | 2.05E-01 | 9.47E-01 | 6.81E-02 |
| 169.52738 | 195.29 | 13.66 | 15.02 | 15.04 | 15.84 | 5.69E-06 | 5.02E-03 | 3.96E-03 | 1.99E-06 | 1.00E+00 | 2.20E-01 | 2.28E-01 |
| 169.54708 | 266.94 | 16.16 | 16.61 | 15.76 | 16.33 | 1.90E-01 | 6.51E-01 | 7.11E-01 | 9.73E-01 | 1.36E-01 | 9.05E-01 | 4.83E-01 |
| 169.96068 | 51.25  | 17.17 | 10.22 | 14.31 | 12.09 | 4.54E-28 | 3.67E-14 | 1.39E-06 | 7.43E-14 | 1.94E-11 | 6.91E-03 | 7.21E-04 |
| 169.9689  | 106.65 | 16.26 | 13.51 | 15.54 | 14.95 | 3.18E-13 | 1.56E-13 | 1.25E-01 | 9.05E-04 | 6.70E-08 | 3.65E-04 | 3.39E-01 |
| 169.97722 | 281.03 | 21.59 | 17.43 | 16.76 | 19.11 | 1.10E-50 | 3.65E-14 | 3.65E-14 | 7.32E-14 | 5.74E-02 | 1.44E-08 | 7.72E-14 |
| 169.98579 | 53.18  | 26.07 | 26.43 | 26.52 | 26.02 | 2.41E-03 | 9.60E-02 | 2.03E-02 | 9.81E-01 | 9.46E-01 | 5.37E-02 | 1.09E-02 |
| 169.98999 | 85.68  | 18.37 | 11.01 | 9.86  | 15.38 | 1.57E-58 | 3.65E-14 | 3.65E-14 | 9.81E-11 | 3.24E-02 | 7.41E-14 | 3.67E-14 |
| 170.01244 | 30.59  | 17.39 | 20.96 | 22.65 | 21.33 | 4.54E-81 | 3.65E-14 | 3.65E-14 | 3.65E-14 | 7.27E-14 | 1.80E-01 | 5.32E-11 |
| 170.0271  | 196.08 | 12.68 | 14.25 | 13.33 | 15.09 | 7.89E-04 | 4.49E-02 | 6.93E-01 | 6.02E-04 | 4.34E-01 | 5.35E-01 | 2.60E-02 |
| 170.03257 | 60.11  | 21.89 | 21.54 | 22.02 | 21.35 | 1.85E-06 | 3.36E-02 | 7.39E-01 | 3.28E-04 | 1.80E-03 | 5.03E-01 | 7.76E-06 |
| 170.04765 | 92.9   | 17.85 | 14.72 | 15.64 | 15.69 | 2.15E-16 | 7.27E-14 | 2.25E-09 | 1.85E-08 | 4.49E-02 | 3.79E-02 | 9.99E-01 |
| 170.05992 | 66.29  | 21.29 | 21.22 | 21.24 | 21.28 | 8.84E-01 | 8.88E-01 | 9.50E-01 | 9.99E-01 | 9.98E-01 | 9.45E-01 | 9.82E-01 |
| 170.06534 | 83.44  | 22.01 | 21.81 | 21.90 | 21.74 | 6.74E-02 | 2.30E-01 | 6.98E-01 | 5.24E-02 | 8.51E-01 | 8.99E-01 | 4.47E-01 |
| 170.08107 | 287.28 | 19.66 | 18.60 | 18.45 | 18.39 | 1.57E-04 | 5.21E-03 | 8.85E-04 | 7.53E-04 | 9.69E-01 | 9.29E-01 | 9.98E-01 |
| 170.09239 | 67.46  | 22.83 | 22.45 | 22.42 | 22.44 | 1.36E-05 | 3.94E-04 | 1.03E-04 | 3.15E-04 | 9.92E-01 | 9.99E-01 | 9.99E-01 |
| 170.09633 | 288.98 | 19.35 | 18.54 | 18.53 | 18.49 | 3.30E-03 | 1.62E-02 | 1.30E-02 | 1.18E-02 | 1.00E+00 | 9.98E-01 | 9.99E-01 |
| 170.11748 | 23.15  | 17.56 | 13.95 | 14.70 | 14.95 | 2.04E-59 | 3.65E-14 | 3.65E-14 | 3.65E-14 | 7.83E-05 | 1.39E-07 | 4.39E-01 |
| 170.11751 | 273.34 | 18.71 | 17.28 | 16.69 | 17.23 | 3.42E-18 | 4.85E-10 | 7.61E-14 | 3.41E-10 | 3.16E-02 | 9.96E-01 | 6.90E-02 |
| 170.15391 | 200.81 | 16.23 | 13.61 | 13.95 | 13.94 | 5.82E-29 | 3.87E-14 | 6.87E-14 | 7.31E-14 | 4.17E-01 | 4.86E-01 | 1.00E+00 |
| 170.50425 | 78.6   | 14.86 | 14.72 | 14.57 | 15.52 | 2.08E-01 | 9.90E-01 | 9.12E-01 | 4.69E-01 | 9.86E-01 | 3.30E-01 | 1.76E-01 |
| 170.50883 | 269.83 | 22.09 | 21.76 | 22.39 | 22.38 | 3.66E-02 | 4.89E-01 | 5.87E-01 | 6.35E-01 | 4.76E-02 | 6.41E-02 | 1.00E+00 |
| 170.5137  | 63.46  | 17.06 | 16.00 | 16.68 | 16.38 | 2.83E-03 | 1.38E-03 | 5.23E-01 | 9.64E-02 | 9.59E-02 | 5.81E-01 | 7.60E-01 |
| 170.52404 | 86.94  | 15.98 | 18.10 | 17.62 | 17.24 | 7.24E-25 | 4.16E-14 | 7.51E-14 | 5.19E-10 | 4.76E-02 | 5.97E-05 | 1.86E-01 |
| 170.53597 | 70.63  | 16.58 | 15.95 | 16.63 | 16.11 | 2.35E-03 | 1.47E-02 | 9.94E-01 | 1.25E-01 | 8.53E-03 | 8.90E-01 | 8.06E-02 |
| 170.55955 | 83.67  | 16.53 | 17.54 | 17.36 | 17.81 | 1.94E-10 | 5.36E-07 | 4.60E-05 | 3.48E-10 | 7.66E-01 | 4.67E-01 | 7.76E-02 |
| 170.56325 | 79.78  | 17.05 | 16.30 | 16.12 | 16.52 | 3.39E-07 | 6.30E-05 | 2.74E-07 | 1.20E-02 | 7.03E-01 | 5.89E-01 | 9.58E-02 |
| 170.567   | 74.78  | 19.09 | 18.60 | 18.56 | 18.59 | 9.60E-06 | 3.08E-04 | 6.90E-05 | 2.81E-04 | 9.89E-01 | 9.99E-01 | 9.98E-01 |
| 170.85422 | 49.02  | 18.57 | 18.30 | 18.45 | 18.11 | 6.18E-07 | 3.57E-03 | 3.84E-01 | 3.42E-07 | 2.58E-01 | 1.33E-01 | 5.18E-04 |
| 170.91406 | 100.14 | 17.08 | 13.92 | 11.29 | 15.30 | 4.43E-29 | 3.06E-11 | 3.65E-14 | 4.99E-04 | 7.13E-08 | 1.49E-02 | 7.65E-14 |
| 170.94447 | 31.21  | 14.23 | 13.22 | 15.77 | 14.68 | 5.02E-29 | 5.68E-07 | 9.38E-14 | 8.33E-02 | 3.65E-14 | 8.13E-12 | 2.38E-07 |
| 170.96101 | 108.8  | 17.42 | 11.36 | 9.82  | 14.92 | 5.87E-42 | 3.65E-14 | 3.65E-14 | 2.70E-06 | 8.37E-03 | 6.87E-11 | 7.09E-14 |
| 170.97429 | 21.85  | 16.00 | 10.92 | 11.47 | 12.03 | 1.05E-85 | 3.65E-14 | 3.65E-14 | 3.65E-14 | 8.01E-03 | 1.12E-08 | 8.97E-03 |

|           |        |       |       |       |       |           |          |          |          |          |          |          |
|-----------|--------|-------|-------|-------|-------|-----------|----------|----------|----------|----------|----------|----------|
| 170.9839  | 54.42  | 20.26 | 20.00 | 20.12 | 19.78 | 1.64E-02  | 2.87E-01 | 7.81E-01 | 9.13E-03 | 8.44E-01 | 4.99E-01 | 1.22E-01 |
| 170.98912 | 52.68  | 20.32 | 20.90 | 20.98 | 20.27 | 4.43E-08  | 2.47E-04 | 1.80E-05 | 9.85E-01 | 9.45E-01 | 1.57E-04 | 1.28E-05 |
| 170.99188 | 52.31  | 16.32 | 15.76 | 15.39 | 14.95 | 5.03E-06  | 1.28E-01 | 1.70E-03 | 2.38E-06 | 4.94E-01 | 1.61E-02 | 3.57E-01 |
| 170.9965  | 39.11  | 13.76 | 14.02 | 16.06 | 16.55 | 3.28E-06  | 9.73E-01 | 9.61E-04 | 6.87E-05 | 6.52E-03 | 6.24E-04 | 8.67E-01 |
| 171.00557 | 272.75 | 17.48 | 15.88 | 15.54 | 16.69 | 1.20E-12  | 1.52E-08 | 5.72E-12 | 1.71E-02 | 5.87E-01 | 1.65E-02 | 1.88E-04 |
| 171.0105  | 263.55 | 18.16 | 17.98 | 17.89 | 18.32 | 5.24E-01  | 9.35E-01 | 7.98E-01 | 9.47E-01 | 9.90E-01 | 6.98E-01 | 5.03E-01 |
| 171.0162  | 98.46  | 17.60 | 19.88 | 18.98 | 18.72 | 2.24E-22  | 4.56E-14 | 1.43E-10 | 5.00E-07 | 7.89E-05 | 5.65E-07 | 6.13E-01 |
| 171.02186 | 82.51  | 14.50 | 15.39 | 14.43 | 15.38 | 4.20E-02  | 1.73E-01 | 9.99E-01 | 1.97E-01 | 1.40E-01 | 1.00E+00 | 1.60E-01 |
| 171.036   | 55.91  | 17.12 | 16.42 | 16.73 | 16.29 | 9.88E-06  | 2.87E-04 | 9.48E-02 | 1.73E-05 | 2.80E-01 | 8.80E-01 | 6.33E-02 |
| 171.04224 | 95.24  | 19.27 | 14.74 | 15.78 | 15.85 | 1.42E-27  | 3.72E-14 | 7.47E-14 | 7.45E-14 | 3.13E-02 | 2.38E-02 | 9.98E-01 |
| 171.06272 | 64.62  | 17.96 | 17.20 | 16.58 | 17.58 | 1.66E-12  | 1.34E-04 | 6.03E-13 | 1.54E-01 | 3.40E-03 | 1.75E-01 | 7.93E-07 |
| 171.07639 | 263.77 | 17.13 | 15.21 | 15.25 | 16.01 | 9.25E-25  | 6.61E-14 | 6.83E-14 | 2.46E-08 | 9.98E-01 | 2.45E-04 | 4.18E-04 |
| 171.08594 | 200.76 | 16.74 | 14.11 | 14.33 | 14.51 | 6.36E-32  | 3.67E-14 | 4.12E-14 | 6.81E-14 | 7.32E-01 | 2.63E-01 | 8.36E-01 |
| 171.08656 | 19.62  | 15.82 | 11.94 | 12.45 | 12.56 | 3.46E-51  | 3.65E-14 | 3.65E-14 | 3.65E-14 | 7.77E-02 | 2.82E-02 | 9.65E-01 |
| 171.08945 | 71.82  | 16.24 | 14.43 | 14.34 | 15.04 | 4.01E-05  | 2.67E-04 | 1.01E-04 | 4.02E-02 | 9.98E-01 | 5.40E-01 | 4.19E-01 |
| 171.0929  | 24.29  | 14.54 | 15.40 | 12.82 | 16.62 | 2.10E-24  | 2.59E-02 | 2.28E-07 | 1.09E-09 | 1.50E-13 | 1.03E-03 | 3.94E-14 |
| 171.09578 | 70.46  | 18.91 | 18.15 | 18.06 | 18.22 | 1.11E-14  | 1.06E-10 | 4.80E-13 | 1.00E-08 | 8.46E-01 | 9.32E-01 | 4.99E-01 |
| 171.10078 | 283.12 | 17.42 | 15.95 | 15.93 | 16.01 | 7.48E-15  | 1.87E-11 | 6.50E-12 | 3.55E-10 | 1.00E+00 | 9.91E-01 | 9.78E-01 |
| 171.11282 | 209.98 | 16.51 | 14.31 | 14.64 | 15.00 | 1.44E-33  | 3.65E-14 | 3.92E-14 | 7.53E-14 | 1.90E-01 | 3.66E-04 | 1.38E-01 |
| 171.11672 | 23.97  | 17.33 | 14.27 | 14.84 | 16.06 | 5.72E-41  | 3.65E-14 | 3.65E-14 | 2.74E-09 | 1.94E-02 | 7.49E-14 | 2.01E-08 |
| 171.11687 | 165.63 | 16.60 | 14.22 | 14.41 | 14.72 | 1.98E-33  | 3.65E-14 | 3.72E-14 | 7.27E-14 | 7.23E-01 | 4.83E-02 | 3.78E-01 |
| 171.13787 | 22.74  | 16.92 | 13.88 | 14.10 | 15.00 | 1.18E-61  | 3.65E-14 | 3.65E-14 | 3.65E-14 | 4.40E-01 | 6.17E-12 | 1.94E-08 |
| 171.1379  | 278.76 | 17.91 | 16.51 | 16.30 | 16.70 | 2.43E-09  | 9.26E-07 | 8.68E-09 | 4.96E-05 | 8.46E-01 | 8.98E-01 | 4.39E-01 |
| 171.14906 | 290.53 | 20.06 | 20.61 | 20.78 | 20.62 | 1.80E-01  | 3.93E-01 | 1.59E-01 | 4.03E-01 | 9.63E-01 | 1.00E+00 | 9.70E-01 |
| 171.18559 | 135.69 | 13.36 | 17.23 | 17.02 | 16.42 | 2.55E-15  | 4.57E-13 | 3.55E-12 | 1.82E-08 | 9.75E-01 | 3.93E-01 | 6.37E-01 |
| 171.48581 | 92.57  | 13.22 | 14.36 | 15.77 | 14.28 | 4.04E-06  | 7.49E-02 | 6.13E-07 | 1.23E-01 | 1.82E-02 | 9.99E-01 | 1.45E-02 |
| 171.51668 | 211.63 | 11.91 | 14.64 | 14.62 | 12.84 | 1.77E-12  | 6.86E-10 | 6.06E-10 | 1.09E-01 | 1.00E+00 | 2.29E-04 | 2.33E-04 |
| 171.52545 | 88.29  | 17.14 | 20.58 | 20.80 | 20.01 | 2.93E-32  | 3.85E-14 | 3.65E-14 | 7.36E-14 | 8.71E-01 | 2.29E-01 | 4.11E-02 |
| 171.53415 | 38.1   | 16.23 | 13.78 | 17.66 | 15.49 | 5.40E-12  | 4.30E-06 | 1.52E-02 | 4.39E-01 | 8.78E-13 | 4.98E-03 | 1.44E-04 |
| 171.55242 | 81.38  | 16.73 | 15.06 | 16.29 | 15.69 | 5.80E-05  | 3.56E-05 | 6.07E-01 | 2.80E-02 | 5.48E-03 | 3.46E-01 | 3.94E-01 |
| 171.57043 | 26.76  | 16.54 | 20.52 | 15.61 | 15.56 | 1.03E-149 | 3.65E-14 | 3.76E-14 | 3.72E-14 | 3.65E-14 | 3.65E-14 | 9.24E-01 |
| 171.59052 | 24.93  | 15.06 | 14.24 | 13.61 | 16.57 | 2.49E-15  | 5.09E-02 | 4.44E-05 | 4.45E-05 | 2.24E-01 | 3.57E-10 | 7.68E-14 |
| 171.95942 | 138.25 | 16.80 | 7.83  | 9.25  | 12.76 | 1.55E-43  | 3.65E-14 | 3.65E-14 | 1.89E-11 | 4.90E-02 | 7.76E-14 | 1.06E-08 |
| 171.98158 | 52.67  | 21.48 | 22.00 | 22.09 | 21.39 | 3.66E-07  | 1.68E-03 | 1.09E-04 | 9.20E-01 | 9.18E-01 | 3.50E-04 | 2.15E-05 |
| 171.98478 | 268.38 | 17.23 | 15.23 | 15.20 | 14.86 | 3.43E-08  | 1.31E-05 | 7.53E-06 | 3.53E-07 | 1.00E+00 | 8.30E-01 | 8.60E-01 |
| 171.99128 | 55.74  | 20.44 | 19.08 | 19.22 | 18.89 | 1.31E-34  | 3.74E-14 | 5.63E-14 | 3.65E-14 | 6.20E-01 | 3.53E-01 | 2.48E-02 |
| 171.9928  | 295.23 | 18.79 | 12.06 | 10.89 | 15.85 | 5.59E-39  | 3.65E-14 | 3.65E-14 | 6.56E-07 | 1.30E-01 | 4.26E-10 | 7.36E-01 |
| 172.02599 | 87.07  | 15.31 | 15.84 | 15.89 | 15.90 | 4.25E-02  | 1.29E-01 | 7.38E-02 | 8.59E-02 | 9.96E-01 | 9.96E-01 | 1.00E+00 |
| 172.03087 | 50.92  | 18.06 | 17.95 | 18.55 | 18.31 | 3.19E-04  | 8.76E-01 | 3.92E-03 | 3.22E-01 | 4.02E-04 | 8.73E-02 | 3.97E-01 |
| 172.04552 | 84.21  | 14.34 | 16.32 | 14.94 | 16.60 | 8.78E-10  | 8.64E-07 | 3.47E-01 | 3.69E-08 | 1.55E-03 | 8.85E-01 | 1.24E-04 |
| 172.05795 | 51.8   | 18.58 | 15.89 | 15.96 | 16.29 | 1.18E-49  | 3.65E-14 | 3.65E-14 | 3.65E-14 | 9.77E-01 | 7.39E-02 | 1.72E-01 |
| 172.06034 | 290.66 | 18.69 | 17.12 | 16.99 | 16.99 | 7.02E-09  | 3.35E-06 | 3.04E-07 | 7.53E-07 | 9.74E-01 | 9.74E-01 | 1.00E+00 |
| 172.06708 | 70.87  | 17.87 | 17.74 | 17.69 | 17.72 | 6.06E-01  | 8.03E-01 | 5.93E-01 | 7.29E-01 | 9.87E-01 | 9.99E-01 | 9.98E-01 |
| 172.06995 | 289.96 | 17.38 | 14.24 | 15.67 | 13.11 | 1.15E-12  | 9.75E-08 | 7.84E-03 | 1.85E-12 | 4.78E-02 | 1.95E-01 | 5.22E-05 |
| 172.0757  | 212.6  | 16.44 | 13.58 | 13.57 | 13.86 | 4.95E-24  | 7.27E-14 | 7.42E-14 | 7.38E-14 | 1.00E+00 | 7.97E-01 | 7.74E-01 |
| 172.0967  | 289.74 | 19.52 | 19.22 | 18.89 | 19.45 | 3.75E-01  | 8.70E-01 | 3.51E-01 | 9.98E-01 | 8.29E-01 | 9.45E-01 | 5.06E-01 |
| 172.10071 | 23.87  | 15.69 | 16.94 | 15.44 | 17.63 | 1.93E-14  | 4.53E-05 | 8.00E-01 | 2.62E-10 | 1.29E-06 | 8.07E-02 | 4.03E-12 |
| 172.10802 | 60.38  | 14.92 | 14.85 | 14.59 | 15.78 | 4.59E-02  | 9.99E-01 | 8.52E-01 | 1.76E-01 | 9.22E-01 | 1.49E-01 | 3.20E-02 |
| 172.13322 | 152.31 | 17.51 | 16.92 | 17.61 | 16.32 | 1.36E-14  | 3.65E-14 | 3.72E-14 | 3.65E-14 | 1.57E-04 | 1.80E-01 | 1.45E-01 |
| 172.13322 | 22.56  | 16.64 | 14.10 | 14.77 | 14.42 | 2.57E-43  | 1.11E-03 | 9.07E-01 | 1.18E-11 | 1.20E-04 | 1.83E-03 | 7.26E-13 |
| 172.15248 | 281.46 | 17.20 | 16.14 | 16.31 | 16.24 | 8.84E-08  | 6.88E-07 | 3.30E-05 | 1.25E-05 | 8.31E-01 | 9.69E-01 | 9.83E-01 |
| 172.16958 | 19.98  | 16.43 | 12.75 | 13.21 | 14.07 | 7.30E-69  | 3.65E-14 | 3.65E-14 | 3.65E-14 | 1.46E-02 | 1.05E-13 | 5.29E-07 |
| 172.16959 | 190.59 | 17.20 | 14.78 | 15.22 | 15.52 | 6.01E-27  | 3.83E-14 | 7.49E-14 | 2.15E-13 | 1.36E-01 | 2.76E-03 | 4.68E-01 |
| 172.4763  | 86.21  | 14.40 | 17.01 | 17.00 | 15.90 | 5.62E-32  | 3.67E-14 | 3.67E-14 | 1.20E-10 | 1.00E+00 | 5.43E-06 | 5.22E-06 |
| 172.50279 | 89.72  | 17.44 | 10.29 | 13.36 | 11.48 | 8.11E-33  | 3.65E-14 | 4.17E-13 | 5.01E-14 | 9.75E-08 | 1.28E-01 | 3.06E-03 |
| 172.50517 | 275.25 | 14.63 | 15.56 | 14.50 | 15.88 | 6.30E-03  | 1.60E-01 | 9.92E-01 | 3.48E-02 | 9.75E-02 | 9.09E-01 | 1.93E-02 |
| 172.51969 | 78.16  | 20.24 | 20.57 | 21.12 | 20.62 | 2.75E-02  | 6.77E-01 | 1.27E-02 | 5.88E-01 | 2.41E-01 | 9.98E-01 | 3.45E-01 |
| 172.52414 | 86.88  | 14.54 | 17.14 | 17.18 | 16.71 | 3.66E-19  | 7.61E-14 | 7.43E-14 | 6.49E-11 | 9.99E-01 | 5.10E-01 | 4.17E-01 |
| 172.53324 | 89.7   | 16.14 | 20.58 | 21.09 | 19.45 | 2.09E-47  | 3.65E-14 | 3.65E-14 | 4.56E-14 | 2.92E-01 | 1.03E-03 | 4.53E-07 |
| 172.55146 | 59.06  | 17.23 | 15.47 | 16.10 | 15.78 | 2.73E-08  | 3.38E-08 | 6.24E-04 | 1.29E-05 | 1.53E-01 | 7.42E-01 | 7.29E-01 |
| 172.85132 | 48.43  | 17.87 | 17.47 | 17.59 | 17.25 | 3.38E-09  | 9.03E-05 | 1.18E-02 | 8.57E-10 | 5.50E-01 | 9.03E-02 | 1.79E-03 |
| 172.95219 | 271.01 | 23.12 | 22.42 | 21.79 | 22.17 | 5.61E-04  | 1.28E-01 | 2.40E-04 | 2.24E-02 | 2.29E-01 | 8.89E-01 | 6.71E-01 |
| 172.95624 | 257.1  | 20.73 | 15.69 | 14.75 | 17.46 | 2.42E-48  | 3.65E-14 | 3.65E-14 | 7.47E-14 | 2.69E-02 | 3.70E-06 | 7.41E-13 |
| 172.95634 | 89.7   | 21.76 | 17.25 | 17.28 | 18.92 | 5.12E-44  | 3.65E-14 | 3.65E-14 | 7.49E-14 | 9.99E-01 | 3.77E-07 | 5.35E-07 |
| 172.97728 | 298.77 | 17.75 | 11.03 | 8.58  | 13.65 | 7.48E-33  | 7.14E-14 | 3.65E-14 | 1.69E-08 | 1.49E-03 | 9.03E-04 | 9.54E-12 |
| 173.02104 | 252.25 | 17.98 | 19.40 | 14.78 | 17.84 | 6.92E-12  | 7.39E-02 | 5.10E-07 | 9.95E-01 | 2.27E-12 | 5.70E-02 | 7.43E-06 |
| 173.02749 | 84.84  | 18.23 | 19.99 | 20.03 | 19.16 | 1.21E-10  | 1.01E-08 | 2.96E-09 | 7.56E-03 | 9.99E-01 | 2.81E-02 | 1.68E-02 |
| 173.03005 | 300.34 | 17.76 | 16.45 | 15.16 | 17.04 | 7.07E-23  | 1.77E-07 | 4.59E-14 | 1.19E-02 | 5.24E-07 | 7.43E-02 | 1.14E-12 |

|           |        |       |       |       |       |          |          |          |          |          |          |          |
|-----------|--------|-------|-------|-------|-------|----------|----------|----------|----------|----------|----------|----------|
| 173.03384 | 89.75  | 15.46 | 16.53 | 17.10 | 16.07 | 7.89E-15 | 2.42E-07 | 7.83E-14 | 1.05E-02 | 1.89E-02 | 9.37E-02 | 2.44E-06 |
| 173.03937 | 83.95  | 16.14 | 15.81 | 15.90 | 15.99 | 3.39E-01 | 2.93E-01 | 5.54E-01 | 8.75E-01 | 9.70E-01 | 7.86E-01 | 9.58E-01 |
| 173.04263 | 251.68 | 18.24 | 17.10 | 18.18 | 16.62 | 2.31E-07 | 1.80E-03 | 9.97E-01 | 5.20E-06 | 4.66E-03 | 4.68E-01 | 2.02E-05 |
| 173.05576 | 65.18  | 17.29 | 16.11 | 16.42 | 16.44 | 4.41E-22 | 6.14E-14 | 3.18E-13 | 4.32E-12 | 2.72E-02 | 2.15E-02 | 9.98E-01 |
| 173.0638  | 200.78 | 16.35 | 13.90 | 14.53 | 14.14 | 8.25E-10 | 5.76E-09 | 1.76E-05 | 3.14E-07 | 3.80E-01 | 9.40E-01 | 7.58E-01 |
| 173.07994 | 242.22 | 16.48 | 14.01 | 14.09 | 14.70 | 3.00E-40 | 3.65E-14 | 3.65E-14 | 6.87E-14 | 9.59E-01 | 4.96E-04 | 2.67E-03 |
| 173.092   | 258.38 | 18.84 | 17.11 | 18.73 | 17.42 | 1.15E-13 | 1.44E-10 | 9.67E-01 | 3.47E-07 | 4.82E-09 | 6.25E-01 | 5.43E-06 |
| 173.09608 | 208.08 | 16.50 | 13.81 | 14.38 | 14.57 | 2.94E-29 | 3.65E-14 | 7.36E-14 | 7.35E-14 | 4.14E-02 | 4.12E-03 | 8.28E-01 |
| 173.10048 | 175.93 | 17.29 | 14.07 | 14.12 | 14.98 | 7.27E-44 | 3.65E-14 | 3.65E-14 | 5.45E-14 | 9.95E-01 | 1.80E-04 | 4.03E-04 |
| 173.12849 | 166.53 | 17.11 | 15.39 | 15.84 | 15.81 | 1.88E-19 | 7.36E-14 | 1.22E-11 | 2.01E-11 | 5.86E-02 | 1.08E-01 | 9.98E-01 |
| 173.13237 | 24     | 18.08 | 15.41 | 16.27 | 17.11 | 8.27E-32 | 3.65E-14 | 7.46E-14 | 8.56E-06 | 8.29E-05 | 9.63E-14 | 2.15E-04 |
| 173.1325  | 179.77 | 17.47 | 15.10 | 15.16 | 15.64 | 1.41E-30 | 3.74E-14 | 3.87E-14 | 7.41E-14 | 9.87E-01 | 4.16E-02 | 8.93E-02 |
| 173.16475 | 26.1   | 17.36 | 20.91 | 18.98 | 18.55 | 6.97E-23 | 4.19E-14 | 1.04E-06 | 9.64E-04 | 1.44E-08 | 2.15E-11 | 5.31E-01 |
| 173.49224 | 277.45 | 20.72 | 19.96 | 20.12 | 20.25 | 1.77E-02 | 7.54E-14 | 7.56E-14 | 3.05E-10 | 9.88E-01 | 1.49E-01 | 6.98E-02 |
| 173.49224 | 43.75  | 20.65 | 19.44 | 19.40 | 19.73 | 6.16E-21 | 1.34E-02 | 7.54E-02 | 2.67E-01 | 9.20E-01 | 6.76E-01 | 9.57E-01 |
| 173.51811 | 89.35  | 17.27 | 14.73 | 15.57 | 15.71 | 1.09E-18 | 7.34E-14 | 4.36E-10 | 3.17E-08 | 6.77E-03 | 1.65E-03 | 9.54E-01 |
| 173.52261 | 272.45 | 17.61 | 16.34 | 16.55 | 16.93 | 5.17E-11 | 1.41E-10 | 6.06E-08 | 1.83E-03 | 6.80E-01 | 1.13E-02 | 1.74E-01 |
| 173.52696 | 86.59  | 16.41 | 16.05 | 16.47 | 15.90 | 1.81E-01 | 5.91E-01 | 9.98E-01 | 3.18E-01 | 4.95E-01 | 9.64E-01 | 2.51E-01 |
| 173.53189 | 91.8   | 16.71 | 17.52 | 17.97 | 16.91 | 1.55E-10 | 1.34E-04 | 6.26E-10 | 7.28E-01 | 9.24E-02 | 1.24E-02 | 1.09E-06 |
| 173.53611 | 87.39  | 15.66 | 16.02 | 16.02 | 16.08 | 5.59E-03 | 3.11E-02 | 3.02E-02 | 9.89E-03 | 1.00E+00 | 9.71E-01 | 9.67E-01 |
| 173.54166 | 92.38  | 16.22 | 16.06 | 15.58 | 15.36 | 4.00E-02 | 9.61E-01 | 2.03E-01 | 5.14E-02 | 4.85E-01 | 1.78E-01 | 9.11E-01 |
| 173.54431 | 92.32  | 15.70 | 17.07 | 17.38 | 16.54 | 5.20E-05 | 1.47E-03 | 4.52E-05 | 1.24E-01 | 8.52E-01 | 5.22E-01 | 1.36E-01 |
| 173.92929 | 267.47 | 16.87 | 13.91 | 14.33 | 14.62 | 9.11E-12 | 7.50E-11 | 1.56E-08 | 1.73E-06 | 7.63E-01 | 3.68E-01 | 9.03E-01 |
| 173.95657 | 101.09 | 16.67 | 10.56 | 12.05 | 14.39 | 3.71E-25 | 4.19E-14 | 7.53E-14 | 1.83E-04 | 3.01E-02 | 2.73E-10 | 1.63E-04 |
| 173.98803 | 117.88 | 13.77 | 15.07 | 15.45 | 15.07 | 1.55E-05 | 1.51E-03 | 1.53E-05 | 2.22E-03 | 7.20E-01 | 1.00E+00 | 7.28E-01 |
| 174.0061  | 274.6  | 19.27 | 21.14 | 21.84 | 20.65 | 1.20E-42 | 3.67E-14 | 3.65E-14 | 7.42E-14 | 4.10E-05 | 9.85E-03 | 3.27E-12 |
| 174.01338 | 60.15  | 16.23 | 15.32 | 16.01 | 16.22 | 3.27E-02 | 3.84E-02 | 9.23E-01 | 1.00E+00 | 1.85E-01 | 5.88E-02 | 9.38E-01 |
| 174.02433 | 90.47  | 17.68 | 17.38 | 17.47 | 17.27 | 6.66E-02 | 2.05E-01 | 5.13E-01 | 5.04E-02 | 9.37E-01 | 9.15E-01 | 6.12E-01 |
| 174.03443 | 89.03  | 16.44 | 18.11 | 18.83 | 17.19 | 3.04E-18 | 8.97E-10 | 7.39E-14 | 1.80E-02 | 2.88E-02 | 3.32E-03 | 1.34E-08 |
| 174.04052 | 105.96 | 18.21 | 16.87 | 16.83 | 16.54 | 3.15E-20 | 4.50E-13 | 1.34E-13 | 7.38E-14 | 9.97E-01 | 2.73E-01 | 3.72E-01 |
| 174.04479 | 85.85  | 15.46 | 15.71 | 15.96 | 16.02 | 2.28E-03 | 3.98E-01 | 9.12E-03 | 4.01E-03 | 4.15E-01 | 2.57E-01 | 9.85E-01 |
| 174.055   | 191.3  | 17.04 | 14.63 | 14.82 | 15.07 | 2.34E-45 | 3.65E-14 | 3.65E-14 | 3.65E-14 | 5.62E-01 | 2.00E-02 | 3.40E-01 |
| 174.07606 | 171.07 | 24.54 | 21.73 | 20.43 | 22.42 | 1.86E-17 | 1.75E-09 | 7.54E-14 | 1.34E-05 | 1.62E-02 | 4.21E-01 | 7.58E-05 |
| 174.08564 | 187.39 | 14.23 | 13.81 | 14.40 | 12.95 | 1.54E-02 | 7.94E-01 | 9.80E-01 | 3.42E-02 | 5.81E-01 | 2.87E-01 | 1.42E-02 |
| 174.0947  | 191.6  | 17.58 | 14.44 | 14.68 | 15.27 | 1.45E-42 | 3.65E-14 | 3.65E-14 | 4.72E-14 | 6.29E-01 | 4.73E-04 | 2.26E-02 |
| 174.11238 | 287.31 | 19.28 | 17.35 | 17.28 | 17.66 | 8.22E-17 | 3.38E-13 | 9.79E-14 | 1.82E-09 | 9.90E-01 | 6.09E-01 | 4.19E-01 |
| 174.12768 | 274.38 | 17.26 | 16.19 | 16.05 | 16.42 | 1.38E-09 | 3.73E-07 | 4.95E-09 | 1.49E-04 | 8.82E-01 | 6.76E-01 | 2.52E-01 |
| 174.13108 | 194.44 | 17.41 | 14.98 | 15.85 | 15.46 | 1.87E-27 | 3.72E-14 | 3.11E-13 | 7.55E-14 | 1.30E-04 | 1.01E-01 | 2.28E-01 |
| 174.14873 | 27.6   | 17.36 | 17.05 | 16.66 | 16.58 | 3.54E-05 | 2.92E-01 | 4.09E-04 | 1.36E-04 | 1.29E-01 | 5.92E-02 | 9.77E-01 |
| 174.16011 | 30.18  | 15.14 | 17.36 | 16.11 | 17.05 | 1.03E-16 | 7.52E-14 | 7.48E-04 | 1.38E-11 | 1.26E-05 | 6.60E-01 | 2.27E-03 |
| 174.16812 | 25.9   | 14.75 | 16.91 | 15.27 | 14.34 | 3.03E-07 | 9.83E-06 | 6.25E-01 | 8.02E-01 | 1.89E-03 | 5.43E-07 | 1.83E-01 |
| 174.50789 | 271.62 | 13.69 | 15.86 | 17.13 | 15.26 | 6.06E-15 | 3.79E-07 | 7.54E-14 | 6.16E-04 | 7.99E-03 | 4.61E-01 | 3.89E-05 |
| 174.51085 | 55.18  | 18.70 | 14.31 | 14.87 | 16.43 | 5.13E-28 | 3.76E-14 | 6.58E-14 | 2.10E-08 | 4.28E-01 | 4.54E-07 | 2.99E-04 |
| 174.52059 | 67.08  | 16.14 | 14.87 | 15.34 | 15.01 | 4.76E-03 | 5.14E-03 | 1.48E-01 | 2.08E-02 | 6.16E-01 | 9.85E-01 | 8.38E-01 |
| 174.53508 | 81.07  | 15.86 | 17.90 | 18.24 | 17.19 | 1.32E-26 | 7.36E-14 | 3.90E-14 | 3.65E-09 | 3.42E-01 | 5.53E-03 | 7.24E-06 |
| 174.89594 | 92.41  | 16.01 | 20.70 | 19.00 | 19.74 | 3.09E-36 | 3.65E-14 | 7.41E-14 | 4.21E-14 | 1.16E-06 | 1.89E-02 | 1.06E-01 |
| 174.93795 | 50.48  | 19.16 | 19.02 | 19.17 | 19.13 | 3.14E-01 | 3.60E-01 | 1.00E+00 | 9.86E-01 | 3.31E-01 | 6.18E-01 | 9.74E-01 |
| 174.94829 | 115.45 | 14.84 | 11.76 | 13.57 | 11.65 | 1.40E-09 | 9.82E-08 | 7.21E-02 | 7.43E-08 | 5.03E-03 | 9.97E-01 | 3.38E-03 |
| 174.95339 | 101.37 | 20.25 | 15.87 | 14.76 | 17.95 | 3.35E-47 | 3.65E-14 | 3.65E-14 | 1.61E-11 | 2.38E-03 | 3.73E-09 | 7.49E-14 |
| 174.95668 | 251.06 | 18.72 | 15.08 | 14.77 | 16.52 | 5.73E-45 | 3.65E-14 | 3.65E-14 | 7.43E-14 | 5.76E-01 | 1.40E-07 | 1.05E-10 |
| 174.9567  | 117    | 19.15 | 15.78 | 17.06 | 17.68 | 2.60E-45 | 3.65E-14 | 4.19E-14 | 5.15E-13 | 2.41E-10 | 7.27E-14 | 7.21E-03 |
| 174.98028 | 23.22  | 17.05 | 10.93 | 11.48 | 12.46 | 2.01E-68 | 3.65E-14 | 3.65E-14 | 3.65E-14 | 1.48E-01 | 2.38E-07 | 1.75E-03 |
| 174.99245 | 271.27 | 17.60 | 15.30 | 15.87 | 15.53 | 1.84E-15 | 1.36E-13 | 8.87E-09 | 3.42E-11 | 1.89E-01 | 8.61E-01 | 6.51E-01 |
| 174.99777 | 60.61  | 15.56 | 13.94 | 15.00 | 15.90 | 2.45E-04 | 1.95E-03 | 5.95E-01 | 8.72E-01 | 9.26E-02 | 2.54E-04 | 2.21E-01 |
| 175.00168 | 42.87  | 23.20 | 23.64 | 23.67 | 24.03 | 1.39E-03 | 1.33E-01 | 8.45E-02 | 4.61E-04 | 9.98E-01 | 2.57E-01 | 3.33E-01 |
| 175.00753 | 35.56  | 16.16 | 17.62 | 19.68 | 17.27 | 5.56E-33 | 2.56E-08 | 3.65E-14 | 5.52E-05 | 1.04E-13 | 5.13E-01 | 7.45E-14 |
| 175.0416  | 94.04  | 15.38 | 15.40 | 15.08 | 14.71 | 1.94E-02 | 1.00E+00 | 5.55E-01 | 2.88E-02 | 5.37E-01 | 3.01E-02 | 4.44E-01 |
| 175.05033 | 60.53  | 15.53 | 13.30 | 13.79 | 14.10 | 1.17E-03 | 8.37E-04 | 1.37E-02 | 7.81E-02 | 8.42E-01 | 5.55E-01 | 9.54E-01 |
| 175.0579  | 62.33  | 14.86 | 15.82 | 15.35 | 15.31 | 6.92E-02 | 3.59E-02 | 4.92E-01 | 5.97E-01 | 5.76E-01 | 5.30E-01 | 9.99E-01 |
| 175.07186 | 207.18 | 15.83 | 13.29 | 13.56 | 13.76 | 1.21E-18 | 7.38E-14 | 1.57E-13 | 3.40E-11 | 7.77E-01 | 3.87E-01 | 9.07E-01 |
| 175.07536 | 204.3  | 16.09 | 13.74 | 14.36 | 14.56 | 4.23E-15 | 7.75E-14 | 3.36E-09 | 5.21E-07 | 1.11E-01 | 2.18E-02 | 8.93E-01 |
| 175.07933 | 284.72 | 20.93 | 19.20 | 18.74 | 19.54 | 1.66E-08 | 1.26E-05 | 1.32E-08 | 1.03E-03 | 5.77E-01 | 8.01E-01 | 1.37E-01 |
| 175.08651 | 215.02 | 16.20 | 11.84 | 11.87 | 12.80 | 2.56E-17 | 9.69E-14 | 9.49E-14 | 4.61E-09 | 1.00E+00 | 2.94E-01 | 3.18E-01 |
| 175.09795 | 191.51 | 16.75 | 13.63 | 14.09 | 14.50 | 1.02E-45 | 3.65E-14 | 3.65E-14 | 3.76E-14 | 5.96E-02 | 3.78E-05 | 1.25E-01 |
| 175.10765 | 155.64 | 17.72 | 17.12 | 15.84 | 17.12 | 8.63E-20 | 5.91E-03 | 6.87E-14 | 7.50E-03 | 1.85E-10 | 1.00E+00 | 5.36E-10 |
| 175.11165 | 22.21  | 16.64 | 13.41 | 14.32 | 14.94 | 9.66E-47 | 3.65E-14 | 3.65E-14 | 7.45E-14 | 3.87E-06 | 1.08E-13 | 3.48E-03 |
| 175.1118  | 169.16 | 17.22 | 15.50 | 15.72 | 15.92 | 1.27E-18 | 7.29E-14 | 1.75E-13 | 3.62E-10 | 6.61E-01 | 1.45E-01 | 7.29E-01 |
| 175.11895 | 73.44  | 25.50 | 25.86 | 26.10 | 26.19 | 1.89E-03 | 2.13E-01 | 8.25E-03 | 2.59E-03 | 6.23E-01 | 3.74E-01 | 9.70E-01 |

|           |        |       |       |       |       |          |          |          |          |          |          |          |
|-----------|--------|-------|-------|-------|-------|----------|----------|----------|----------|----------|----------|----------|
| 175.14411 | 65.62  | 17.70 | 18.18 | 17.63 | 17.70 | 3.42E-03 | 1.53E-02 | 9.67E-01 | 1.00E+00 | 4.58E-03 | 2.49E-02 | 9.72E-01 |
| 175.14799 | 24.18  | 18.94 | 16.84 | 17.43 | 17.98 | 3.17E-33 | 3.65E-14 | 6.89E-14 | 4.03E-09 | 5.26E-04 | 1.30E-11 | 2.07E-03 |
| 175.14806 | 287.99 | 18.29 | 16.53 | 16.71 | 16.70 | 4.58E-13 | 3.95E-11 | 2.12E-09 | 6.79E-09 | 8.84E-01 | 9.01E-01 | 1.00E+00 |
| 175.45495 | 119.06 | 15.72 | 14.38 | 15.10 | 14.11 | 4.65E-05 | 1.14E-03 | 3.02E-01 | 9.07E-05 | 1.90E-01 | 8.92E-01 | 4.01E-02 |
| 175.51037 | 54.45  | 13.67 | 11.92 | 15.68 | 12.65 | 4.32E-08 | 2.17E-02 | 5.10E-03 | 3.59E-01 | 3.28E-08 | 6.63E-01 | 1.99E-05 |
| 175.52984 | 82.3   | 21.55 | 22.83 | 23.25 | 22.41 | 1.02E-07 | 8.29E-05 | 5.14E-08 | 2.15E-02 | 4.68E-01 | 5.09E-01 | 2.70E-02 |
| 175.5433  | 92.34  | 16.11 | 19.81 | 20.20 | 18.30 | 5.48E-55 | 3.65E-14 | 3.65E-14 | 7.21E-14 | 2.47E-01 | 3.26E-10 | 7.59E-14 |
| 175.55036 | 85.7   | 15.99 | 16.03 | 15.89 | 16.18 | 4.11E-01 | 9.95E-01 | 9.28E-01 | 6.62E-01 | 8.43E-01 | 8.13E-01 | 3.28E-01 |
| 175.60375 | 20.46  | 14.11 | 16.23 | 14.45 | 16.26 | 2.99E-14 | 4.31E-10 | 6.99E-01 | 6.58E-10 | 3.09E-07 | 1.00E+00 | 3.75E-07 |
| 175.60378 | 264.47 | 17.29 | 13.16 | 13.09 | 13.61 | 1.84E-22 | 7.47E-14 | 7.49E-14 | 1.19E-13 | 9.99E-01 | 7.47E-01 | 6.52E-01 |
| 175.95461 | 98.97  | 18.18 | 11.99 | 13.72 | 12.14 | 1.55E-26 | 5.05E-14 | 1.71E-13 | 6.52E-14 | 1.19E-02 | 9.94E-01 | 3.23E-02 |
| 175.98996 | 144.1  | 15.94 | 13.85 | 13.36 | 13.41 | 5.85E-09 | 2.57E-05 | 9.69E-08 | 4.50E-07 | 7.06E-01 | 7.80E-01 | 1.00E+00 |
| 175.99888 | 42.6   | 17.47 | 16.27 | 16.29 | 17.07 | 2.16E-13 | 1.09E-10 | 1.90E-10 | 1.08E-01 | 9.99E-01 | 6.66E-05 | 1.08E-04 |
| 176.00502 | 38.19  | 18.84 | 19.03 | 19.10 | 19.48 | 2.92E-03 | 6.21E-01 | 3.62E-01 | 1.04E-03 | 9.78E-01 | 5.57E-02 | 1.32E-01 |
| 176.00977 | 51.5   | 20.63 | 20.24 | 20.16 | 19.37 | 5.82E-17 | 1.28E-02 | 1.27E-03 | 7.36E-14 | 9.21E-01 | 2.58E-09 | 5.51E-08 |
| 176.01618 | 37.08  | 17.22 | 16.87 | 18.98 | 17.42 | 3.23E-17 | 4.14E-01 | 1.06E-12 | 8.19E-01 | 7.56E-14 | 1.00E-01 | 2.19E-09 |
| 176.01693 | 167.47 | 14.05 | 14.85 | 14.66 | 14.50 | 1.64E-01 | 1.33E-01 | 3.37E-01 | 6.36E-01 | 9.58E-01 | 8.01E-01 | 9.74E-01 |
| 176.03149 | 78.67  | 17.80 | 15.59 | 17.20 | 16.54 | 2.62E-11 | 1.20E-11 | 1.84E-01 | 2.83E-04 | 1.46E-06 | 1.46E-02 | 1.42E-01 |
| 176.03749 | 292.63 | 15.87 | 17.10 | 17.61 | 16.73 | 2.56E-08 | 9.00E-05 | 8.39E-09 | 1.54E-02 | 2.77E-01 | 5.90E-01 | 1.47E-02 |
| 176.03893 | 45.55  | 21.20 | 21.19 | 21.13 | 21.48 | 5.36E-02 | 1.00E+00 | 9.43E-01 | 1.43E-01 | 9.64E-01 | 1.44E-01 | 4.57E-02 |
| 176.04368 | 92.55  | 15.16 | 16.33 | 16.25 | 15.26 | 1.19E-13 | 7.65E-10 | 7.23E-09 | 9.31E-01 | 9.70E-01 | 1.43E-07 | 1.02E-06 |
| 176.05539 | 161.97 | 18.09 | 15.62 | 15.60 | 16.70 | 7.05E-37 | 3.65E-14 | 3.65E-14 | 6.38E-12 | 1.00E+00 | 1.74E-07 | 8.01E-08 |
| 176.05541 | 24.9   | 17.06 | 13.52 | 14.58 | 14.89 | 1.83E-24 | 3.96E-14 | 1.04E-13 | 8.53E-11 | 3.57E-03 | 1.33E-04 | 7.57E-01 |
| 176.06577 | 49.85  | 19.67 | 19.08 | 19.49 | 19.08 | 6.14E-09 | 4.09E-07 | 3.18E-01 | 8.59E-07 | 1.09E-03 | 1.00E+00 | 1.57E-03 |
| 176.07057 | 21.55  | 16.96 | 13.29 | 15.24 | 15.37 | 2.63E-24 | 3.74E-14 | 1.38E-07 | 3.06E-06 | 5.33E-09 | 1.76E-09 | 9.76E-01 |
| 176.07059 | 280.03 | 17.29 | 15.64 | 15.48 | 15.65 | 4.27E-16 | 1.62E-11 | 1.78E-13 | 6.15E-11 | 8.89E-01 | 1.00E+00 | 8.83E-01 |
| 176.07066 | 178.75 | 17.96 | 15.28 | 15.33 | 15.92 | 3.50E-31 | 3.72E-14 | 3.74E-14 | 7.43E-14 | 9.97E-01 | 3.07E-02 | 4.80E-02 |
| 176.07384 | 285.41 | 16.69 | 16.09 | 15.74 | 15.49 | 3.31E-04 | 1.50E-01 | 4.74E-03 | 3.00E-04 | 6.28E-01 | 1.91E-01 | 8.31E-01 |
| 176.08272 | 288.44 | 19.66 | 18.62 | 18.25 | 18.67 | 6.16E-05 | 4.54E-03 | 3.64E-05 | 1.07E-02 | 6.47E-01 | 9.98E-01 | 5.55E-01 |
| 176.09569 | 24.78  | 14.33 | 14.79 | 13.92 | 15.99 | 2.76E-07 | 5.29E-01 | 6.22E-01 | 2.39E-05 | 6.39E-02 | 6.09E-03 | 1.65E-07 |
| 176.10291 | 162.99 | 17.08 | 20.54 | 16.84 | 20.34 | 3.35E-16 | 3.36E-10 | 9.64E-01 | 8.06E-09 | 5.79E-11 | 9.82E-01 | 1.44E-09 |
| 176.10584 | 33.61  | 15.45 | 9.64  | 11.76 | 11.96 | 5.14E-19 | 7.04E-14 | 1.57E-09 | 3.74E-08 | 1.69E-03 | 7.54E-04 | 9.86E-01 |
| 176.10687 | 199.39 | 16.86 | 11.49 | 13.28 | 12.79 | 8.61E-51 | 3.65E-14 | 3.65E-14 | 3.65E-14 | 4.50E-09 | 5.95E-05 | 3.15E-01 |
| 176.11016 | 274.68 | 18.87 | 16.28 | 15.91 | 16.53 | 8.04E-36 | 3.72E-14 | 3.65E-14 | 6.05E-14 | 2.93E-01 | 6.96E-01 | 2.66E-02 |
| 176.11623 | 74.73  | 18.95 | 19.50 | 19.91 | 19.70 | 2.16E-06 | 1.26E-02 | 1.33E-06 | 3.71E-04 | 1.35E-01 | 7.22E-01 | 7.14E-01 |
| 176.12228 | 72.79  | 21.43 | 21.93 | 22.27 | 22.12 | 3.32E-05 | 2.76E-02 | 2.58E-05 | 1.34E-03 | 2.70E-01 | 7.66E-01 | 8.59E-01 |
| 176.12807 | 49.16  | 20.48 | 20.94 | 20.54 | 20.64 | 1.98E-04 | 1.48E-04 | 9.34E-01 | 4.36E-01 | 2.01E-03 | 4.80E-02 | 7.99E-01 |
| 176.15135 | 23.15  | 16.25 | 10.27 | 12.60 | 13.53 | 1.46E-25 | 3.70E-14 | 2.50E-12 | 4.61E-07 | 2.04E-05 | 4.46E-09 | 2.55E-01 |
| 176.4928  | 98.82  | 18.92 | 10.77 | 12.66 | 11.88 | 3.35E-50 | 3.65E-14 | 3.65E-14 | 3.65E-14 | 2.00E-04 | 8.00E-02 | 3.23E-01 |
| 176.49718 | 103.3  | 18.36 | 16.68 | 18.01 | 16.73 | 4.20E-15 | 1.67E-11 | 4.08E-01 | 1.89E-10 | 1.99E-07 | 9.97E-01 | 1.18E-06 |
| 176.5177  | 37.06  | 14.46 | 11.16 | 15.09 | 13.82 | 1.66E-23 | 7.54E-14 | 2.45E-01 | 2.72E-01 | 5.32E-14 | 2.66E-11 | 2.83E-03 |
| 176.52775 | 83.13  | 17.36 | 17.44 | 18.32 | 17.26 | 3.10E-03 | 9.95E-01 | 9.63E-03 | 9.88E-01 | 2.66E-02 | 9.49E-01 | 6.17E-03 |
| 176.53176 | 82.57  | 18.67 | 16.08 | 17.36 | 16.99 | 2.37E-19 | 7.12E-14 | 1.35E-06 | 1.67E-09 | 5.46E-06 | 3.42E-03 | 4.86E-01 |
| 176.54219 | 92.83  | 14.62 | 16.40 | 16.59 | 14.92 | 1.42E-27 | 7.36E-14 | 6.16E-14 | 4.04E-01 | 7.33E-01 | 3.06E-12 | 7.69E-14 |
| 176.54633 | 80.72  | 16.36 | 16.82 | 16.55 | 16.70 | 7.10E-02 | 5.39E-02 | 7.26E-01 | 2.58E-01 | 4.44E-01 | 9.20E-01 | 8.47E-01 |
| 176.61147 | 24.78  | 12.56 | 15.55 | 12.93 | 15.89 | 2.24E-14 | 3.91E-09 | 8.51E-01 | 1.80E-10 | 5.42E-07 | 9.03E-01 | 3.08E-08 |
| 176.89409 | 107.37 | 15.48 | 16.85 | 15.10 | 16.29 | 1.47E-05 | 1.16E-03 | 7.04E-01 | 1.32E-01 | 2.37E-05 | 4.66E-01 | 1.01E-02 |
| 176.93668 | 28.4   | 16.98 | 18.87 | 18.97 | 18.74 | 2.11E-41 | 3.65E-14 | 3.65E-14 | 3.65E-14 | 8.73E-01 | 7.92E-01 | 3.41E-01 |
| 176.94513 | 147.37 | 17.32 | 15.73 | 17.56 | 16.02 | 5.32E-18 | 4.30E-07 | 2.14E-12 | 1.12E-03 | 1.74E-01 | 3.84E-01 | 2.18E-03 |
| 176.94513 | 255.16 | 17.11 | 15.32 | 14.65 | 15.87 | 5.10E-12 | 1.69E-11 | 6.68E-01 | 8.17E-08 | 1.30E-13 | 5.82E-01 | 4.68E-10 |
| 176.9528  | 107.84 | 17.04 | 10.65 | 11.06 | 14.12 | 4.54E-30 | 3.74E-14 | 4.34E-14 | 7.14E-07 | 8.73E-01 | 8.61E-09 | 3.23E-07 |
| 176.9924  | 75.78  | 16.99 | 16.15 | 16.07 | 16.42 | 4.32E-09 | 4.06E-07 | 1.94E-08 | 1.61E-03 | 9.56E-01 | 3.26E-01 | 1.22E-01 |
| 176.99975 | 43.33  | 19.46 | 19.57 | 19.69 | 19.99 | 1.09E-02 | 8.78E-01 | 4.33E-01 | 5.98E-03 | 8.84E-01 | 6.23E-02 | 2.72E-01 |
| 177.01405 | 51.79  | 16.68 | 15.71 | 16.02 | 14.62 | 1.18E-05 | 5.93E-02 | 3.15E-01 | 2.65E-06 | 8.56E-01 | 4.12E-02 | 3.57E-03 |
| 177.02029 | 29.87  | 15.69 | 16.87 | 17.86 | 17.54 | 4.53E-12 | 4.77E-04 | 1.14E-11 | 2.25E-08 | 6.07E-03 | 1.37E-01 | 7.25E-01 |
| 177.02472 | 72.52  | 17.13 | 16.39 | 15.70 | 16.39 | 8.78E-05 | 6.70E-02 | 1.78E-05 | 7.81E-02 | 1.21E-01 | 1.00E+00 | 1.36E-01 |
| 177.03278 | 193.51 | 17.40 | 20.62 | 20.51 | 20.43 | 2.14E-25 | 7.01E-14 | 7.38E-14 | 7.47E-14 | 9.82E-01 | 9.34E-01 | 9.95E-01 |
| 177.04108 | 39.86  | 20.31 | 21.19 | 20.97 | 20.81 | 4.28E-05 | 2.32E-05 | 2.36E-03 | 4.42E-02 | 6.54E-01 | 2.24E-01 | 8.53E-01 |
| 177.05131 | 74.69  | 17.27 | 16.61 | 16.45 | 16.77 | 2.52E-04 | 4.53E-03 | 1.83E-04 | 6.37E-02 | 8.55E-01 | 8.60E-01 | 3.96E-01 |
| 177.05461 | 205.86 | 16.88 | 14.45 | 14.89 | 15.10 | 6.62E-40 | 3.65E-14 | 3.65E-14 | 5.10E-14 | 2.72E-02 | 4.45E-04 | 5.52E-01 |
| 177.06474 | 298.02 | 14.73 | 13.90 | 11.49 | 13.12 | 1.28E-08 | 3.60E-01 | 4.16E-09 | 1.18E-02 | 3.52E-05 | 4.66E-01 | 1.33E-02 |
| 177.06909 | 50.54  | 14.81 | 13.76 | 14.91 | 14.37 | 1.34E-01 | 1.87E-01 | 9.98E-01 | 8.44E-01 | 1.42E-01 | 6.89E-01 | 7.60E-01 |
| 177.07744 | 34.38  | 16.27 | 15.80 | 16.03 | 15.26 | 7.62E-03 | 3.55E-01 | 8.19E-01 | 3.89E-03 | 8.71E-01 | 2.87E-01 | 5.71E-02 |
| 177.08602 | 288.47 | 21.26 | 20.28 | 20.90 | 20.96 | 8.77E-02 | 5.26E-02 | 7.73E-01 | 8.68E-01 | 3.92E-01 | 3.37E-01 | 9.99E-01 |
| 177.09098 | 171.2  | 17.62 | 15.32 | 15.66 | 16.35 | 1.02E-27 | 3.74E-14 | 6.89E-14 | 2.22E-09 | 3.04E-01 | 2.62E-06 | 2.64E-03 |
| 177.09498 | 280.74 | 20.61 | 19.07 | 18.68 | 18.88 | 1.15E-07 | 1.00E-04 | 4.78E-07 | 1.57E-05 | 7.03E-01 | 9.54E-01 | 9.53E-01 |
| 177.10121 | 47.96  | 18.81 | 19.01 | 19.40 | 19.32 | 1.12E-02 | 7.31E-01 | 1.45E-02 | 5.48E-02 | 2.22E-01 | 4.39E-01 | 9.84E-01 |
| 177.10636 | 161.49 | 12.29 | 14.96 | 13.03 | 14.89 | 1.81E-10 | 2.46E-08 | 3.25E-01 | 1.27E-07 | 1.30E-04 | 9.99E-01 | 3.67E-04 |

|           |        |       |       |       |       |          |          |          |          |          |          |          |
|-----------|--------|-------|-------|-------|-------|----------|----------|----------|----------|----------|----------|----------|
| 177.12281 | 60.1   | 17.55 | 18.38 | 18.19 | 18.71 | 2.47E-12 | 1.93E-07 | 7.35E-05 | 1.56E-12 | 5.81E-01 | 1.42E-01 | 4.35E-03 |
| 177.12733 | 288.37 | 17.46 | 16.20 | 16.21 | 16.13 | 5.73E-10 | 1.90E-07 | 1.74E-07 | 8.11E-08 | 1.00E+00 | 9.90E-01 | 9.86E-01 |
| 177.12734 | 20.23  | 17.20 | 14.46 | 14.53 | 15.06 | 3.73E-36 | 3.65E-14 | 3.65E-14 | 7.16E-14 | 9.87E-01 | 2.32E-02 | 5.25E-02 |
| 177.16366 | 23.81  | 18.04 | 15.57 | 15.81 | 16.68 | 2.10E-39 | 3.65E-14 | 3.65E-14 | 1.79E-13 | 4.71E-01 | 3.05E-09 | 3.44E-06 |
| 177.16377 | 176.99 | 18.13 | 15.27 | 15.79 | 16.24 | 4.24E-32 | 3.65E-14 | 5.03E-14 | 7.67E-14 | 7.54E-02 | 1.05E-04 | 1.71E-01 |
| 177.52559 | 254.12 | 15.06 | 15.64 | 14.95 | 14.99 | 4.74E-02 | 1.36E-01 | 9.74E-01 | 9.92E-01 | 5.88E-02 | 9.67E-02 | 9.99E-01 |
| 177.53337 | 84.77  | 18.18 | 15.49 | 14.84 | 16.31 | 7.66E-25 | 7.56E-14 | 4.19E-14 | 9.33E-09 | 1.24E-01 | 3.66E-02 | 1.19E-05 |
| 177.5438  | 61.7   | 16.45 | 15.82 | 16.99 | 15.85 | 1.16E-05 | 6.24E-02 | 1.30E-01 | 9.37E-02 | 5.04E-05 | 1.00E+00 | 1.25E-04 |
| 177.54695 | 84.71  | 18.10 | 16.13 | 16.58 | 17.14 | 1.38E-21 | 6.58E-14 | 1.19E-13 | 4.42E-06 | 7.80E-02 | 2.56E-06 | 2.10E-02 |
| 177.94803 | 287.81 | 15.94 | 18.41 | 18.19 | 16.71 | 2.02E-29 | 3.94E-14 | 5.98E-14 | 1.95E-03 | 7.23E-01 | 2.46E-12 | 7.05E-10 |
| 177.95751 | 274.75 | 25.15 | 24.60 | 24.34 | 24.44 | 2.07E-02 | 1.97E-01 | 2.02E-02 | 6.71E-02 | 8.13E-01 | 9.54E-01 | 9.87E-01 |
| 177.99879 | 186.03 | 12.13 | 9.49  | 10.57 | 14.27 | 1.76E-08 | 2.02E-03 | 1.37E-01 | 2.28E-02 | 4.70E-01 | 1.55E-08 | 1.38E-05 |
| 178.00874 | 69.64  | 18.72 | 16.79 | 17.10 | 16.85 | 7.65E-17 | 1.20E-13 | 9.52E-11 | 8.06E-13 | 5.77E-01 | 9.96E-01 | 7.35E-01 |
| 178.02402 | 47.74  | 19.65 | 19.76 | 19.97 | 19.68 | 8.60E-06 | 3.51E-01 | 8.75E-06 | 9.65E-01 | 9.30E-03 | 6.89E-01 | 2.20E-04 |
| 178.03512 | 286.58 | 18.32 | 17.47 | 17.50 | 17.46 | 3.21E-04 | 2.13E-03 | 2.71E-03 | 2.32E-03 | 1.00E+00 | 1.00E+00 | 9.98E-01 |
| 178.04091 | 59.93  | 14.59 | 14.17 | 15.24 | 14.68 | 1.29E-01 | 7.61E-01 | 4.41E-01 | 9.98E-01 | 7.92E-02 | 6.83E-01 | 6.11E-01 |
| 178.04469 | 41.04  | 16.66 | 16.09 | 15.91 | 16.22 | 2.09E-02 | 9.99E-02 | 1.41E-02 | 3.14E-01 | 9.02E-01 | 9.57E-01 | 6.39E-01 |
| 178.05037 | 276.48 | 16.83 | 17.65 | 17.77 | 16.52 | 1.19E-06 | 6.78E-03 | 1.10E-03 | 6.21E-01 | 9.65E-01 | 1.75E-04 | 2.07E-05 |
| 178.0532  | 62.74  | 12.19 | 14.99 | 14.80 | 15.70 | 6.82E-08 | 2.53E-05 | 9.00E-05 | 1.70E-07 | 9.88E-01 | 6.73E-01 | 4.66E-01 |
| 178.05883 | 76.99  | 17.44 | 17.87 | 17.70 | 18.20 | 1.92E-04 | 4.86E-02 | 3.74E-01 | 6.43E-05 | 7.62E-01 | 2.28E-01 | 2.26E-02 |
| 178.07205 | 300.37 | 16.62 | 16.41 | 15.31 | 15.64 | 6.02E-11 | 6.93E-01 | 9.89E-10 | 1.53E-05 | 9.41E-07 | 1.88E-03 | 3.76E-01 |
| 178.08619 | 288.63 | 17.58 | 15.52 | 15.64 | 16.10 | 8.16E-14 | 4.39E-12 | 3.79E-11 | 1.28E-06 | 9.76E-01 | 1.87E-01 | 3.69E-01 |
| 178.08958 | 169    | 17.50 | 14.72 | 14.82 | 15.44 | 4.49E-41 | 3.65E-14 | 3.65E-14 | 5.81E-14 | 9.43E-01 | 1.13E-03 | 6.85E-03 |
| 178.096   | 178.34 | 17.12 | 13.24 | 13.29 | 14.15 | 4.14E-39 | 3.65E-14 | 3.65E-14 | 6.29E-14 | 9.98E-01 | 7.88E-03 | 1.20E-02 |
| 178.09772 | 280.62 | 18.43 | 16.11 | 16.35 | 16.27 | 3.38E-19 | 7.34E-14 | 2.15E-13 | 1.84E-13 | 8.01E-01 | 9.42E-01 | 9.89E-01 |
| 178.10733 | 294.64 | 17.13 | 15.67 | 15.95 | 15.83 | 2.62E-06 | 8.50E-06 | 4.22E-04 | 1.56E-04 | 7.89E-01 | 9.54E-01 | 9.81E-01 |
| 178.1074  | 201.58 | 18.82 | 16.07 | 17.14 | 16.56 | 4.88E-25 | 4.34E-14 | 5.53E-11 | 7.38E-14 | 8.57E-05 | 2.15E-01 | 8.58E-02 |
| 178.11698 | 153.14 | 16.70 | 15.20 | 15.91 | 14.85 | 1.62E-12 | 1.38E-08 | 5.89E-03 | 8.74E-12 | 2.25E-02 | 5.05E-01 | 2.12E-04 |
| 178.12253 | 277.68 | 18.57 | 17.39 | 17.13 | 17.72 | 1.72E-11 | 6.79E-08 | 2.57E-11 | 2.84E-04 | 5.66E-01 | 3.88E-01 | 2.34E-02 |
| 178.12951 | 24.46  | 12.23 | 15.58 | 13.06 | 16.12 | 9.58E-16 | 2.36E-10 | 2.97E-01 | 1.00E-12 | 4.53E-06 | 7.13E-01 | 3.91E-08 |
| 178.13378 | 26.04  | 21.23 | 20.80 | 20.78 | 21.17 | 7.93E-02 | 1.93E-01 | 1.57E-01 | 9.92E-01 | 1.00E+00 | 3.76E-01 | 3.25E-01 |
| 178.49494 | 281.78 | 16.20 | 14.96 | 14.37 | 15.22 | 1.23E-03 | 3.92E-02 | 4.90E-04 | 1.68E-01 | 5.92E-01 | 9.52E-01 | 2.96E-01 |
| 178.50162 | 103.92 | 16.34 | 15.67 | 16.04 | 16.39 | 8.52E-04 | 2.46E-03 | 3.69E-01 | 9.92E-01 | 2.23E-01 | 1.86E-03 | 2.72E-01 |
| 178.53081 | 90.25  | 18.26 | 12.87 | 14.17 | 13.73 | 8.44E-32 | 3.65E-14 | 7.42E-14 | 6.05E-14 | 9.51E-03 | 1.84E-01 | 7.19E-01 |
| 178.53349 | 94.95  | 17.65 | 12.91 | 13.19 | 14.77 | 3.16E-42 | 3.65E-14 | 3.65E-14 | 7.49E-14 | 7.91E-01 | 8.29E-08 | 5.70E-06 |
| 178.54909 | 91.52  | 19.89 | 16.10 | 16.36 | 16.49 | 2.35E-42 | 3.65E-14 | 3.65E-14 | 3.65E-14 | 7.20E-01 | 4.26E-01 | 9.57E-01 |
| 178.56041 | 67.6   | 14.89 | 15.71 | 15.14 | 15.22 | 3.22E-01 | 2.44E-01 | 9.34E-01 | 8.78E-01 | 5.95E-01 | 7.24E-01 | 9.98E-01 |
| 178.93317 | 43.8   | 12.88 | 14.76 | 14.93 | 14.94 | 1.10E-28 | 7.21E-14 | 4.79E-14 | 5.65E-14 | 8.05E-01 | 7.67E-01 | 1.00E+00 |
| 178.94155 | 276.43 | 18.33 | 18.93 | 19.21 | 18.88 | 6.64E-05 | 8.63E-03 | 2.43E-05 | 2.56E-02 | 4.70E-01 | 9.93E-01 | 3.34E-01 |
| 178.95478 | 116.64 | 17.03 | 14.85 | 15.17 | 15.37 | 4.05E-22 | 7.18E-14 | 7.45E-14 | 2.18E-12 | 4.54E-01 | 9.02E-02 | 7.89E-01 |
| 178.96102 | 257.68 | 19.13 | 17.50 | 17.22 | 17.78 | 7.63E-12 | 1.83E-08 | 3.14E-11 | 7.16E-06 | 7.36E-01 | 7.52E-01 | 1.90E-01 |
| 178.9656  | 102.87 | 17.62 | 14.57 | 15.67 | 15.12 | 1.24E-24 | 4.52E-14 | 1.23E-11 | 7.39E-14 | 3.86E-04 | 2.06E-01 | 1.95E-01 |
| 178.97421 | 104.03 | 14.71 | 15.63 | 15.84 | 15.94 | 2.42E-03 | 5.01E-02 | 8.15E-03 | 4.76E-03 | 9.38E-01 | 8.40E-01 | 9.93E-01 |
| 178.98224 | 60.03  | 17.86 | 13.53 | 14.19 | 15.27 | 3.61E-17 | 7.43E-14 | 1.70E-12 | 1.67E-06 | 5.26E-01 | 3.62E-03 | 1.37E-01 |
| 178.9907  | 272.97 | 18.07 | 10.20 | 10.81 | 11.76 | 1.38E-82 | 3.65E-14 | 3.65E-14 | 3.65E-14 | 1.33E-01 | 1.10E-06 | 5.95E-03 |
| 178.99251 | 49.47  | 17.43 | 17.24 | 18.47 | 18.08 | 3.17E-11 | 7.06E-01 | 7.10E-08 | 2.44E-03 | 6.52E-10 | 7.15E-05 | 1.57E-01 |
| 179.02858 | 196.82 | 13.41 | 14.04 | 13.72 | 15.01 | 3.09E-03 | 4.43E-01 | 8.76E-01 | 1.64E-03 | 8.85E-01 | 1.38E-01 | 2.19E-02 |
| 179.02993 | 86.9   | 18.90 | 13.68 | 14.02 | 15.98 | 4.64E-34 | 3.65E-14 | 3.67E-14 | 1.55E-11 | 8.21E-01 | 2.98E-07 | 1.40E-05 |
| 179.03763 | 37.32  | 16.13 | 16.34 | 15.70 | 17.58 | 4.66E-10 | 8.41E-01 | 3.28E-01 | 5.98E-07 | 7.10E-02 | 5.06E-05 | 1.99E-01 |
| 179.04848 | 193.05 | 19.10 | 20.36 | 21.14 | 20.19 | 1.12E-17 | 2.89E-08 | 7.37E-14 | 3.74E-06 | 1.55E-03 | 8.63E-01 | 1.00E-04 |
| 179.05608 | 58.79  | 16.03 | 15.93 | 15.12 | 15.64 | 8.62E-02 | 9.93E-01 | 7.67E-02 | 7.48E-01 | 1.63E-01 | 8.88E-01 | 5.63E-01 |
| 179.06368 | 269.32 | 17.80 | 16.85 | 16.41 | 17.23 | 8.64E-14 | 2.36E-07 | 1.08E-13 | 6.03E-03 | 5.28E-02 | 1.34E-01 | 2.77E-05 |
| 179.07017 | 289.62 | 17.17 | 17.36 | 15.96 | 16.44 | 6.50E-08 | 8.65E-01 | 8.21E-06 | 2.17E-02 | 4.67E-07 | 2.76E-03 | 2.51E-01 |
| 179.07021 | 20.59  | 16.49 | 15.09 | 13.05 | 14.31 | 6.98E-27 | 3.06E-06 | 3.67E-14 | 1.22E-12 | 2.00E-11 | 3.60E-02 | 7.79E-05 |
| 179.0816  | 148.79 | 18.04 | 15.51 | 15.38 | 16.39 | 3.48E-41 | 3.65E-14 | 3.65E-14 | 7.47E-14 | 8.79E-01 | 1.33E-05 | 3.34E-07 |
| 179.10179 | 155.52 | 21.28 | 20.34 | 20.56 | 20.22 | 2.08E-01 | 2.97E-01 | 5.31E-01 | 2.25E-01 | 9.77E-01 | 9.97E-01 | 9.33E-01 |
| 179.10651 | 284.76 | 18.37 | 17.14 | 17.22 | 17.10 | 2.05E-08 | 1.24E-06 | 5.32E-06 | 1.17E-06 | 9.86E-01 | 9.99E-01 | 9.63E-01 |
| 179.10654 | 20.18  | 17.70 | 14.69 | 15.27 | 15.88 | 7.30E-53 | 3.65E-14 | 3.65E-14 | 4.05E-14 | 1.09E-03 | 7.69E-12 | 7.48E-04 |
| 179.12846 | 62.09  | 19.20 | 20.21 | 20.11 | 19.76 | 8.82E-10 | 5.08E-09 | 1.21E-07 | 3.11E-03 | 9.22E-01 | 4.11E-02 | 1.66E-01 |
| 179.1371  | 25.83  | 18.07 | 16.78 | 17.06 | 17.68 | 4.33E-08 | 1.23E-07 | 4.25E-05 | 3.22E-01 | 6.05E-01 | 9.19E-04 | 4.07E-02 |
| 179.1429  | 23.75  | 17.68 | 16.08 | 16.70 | 16.65 | 3.33E-23 | 4.32E-14 | 6.28E-11 | 3.32E-11 | 7.89E-05 | 5.80E-04 | 9.85E-01 |
| 179.14294 | 298    | 17.71 | 17.24 | 17.39 | 17.31 | 1.78E-01 | 1.67E-01 | 4.98E-01 | 3.15E-01 | 9.12E-01 | 9.92E-01 | 9.84E-01 |
| 179.4758  | 105.29 | 18.11 | 12.34 | 14.51 | 13.70 | 7.87E-22 | 6.16E-14 | 4.00E-10 | 2.74E-13 | 4.90E-04 | 7.54E-02 | 4.63E-01 |
| 179.51399 | 278.83 | 19.52 | 21.10 | 21.12 | 20.71 | 5.40E-13 | 1.03E-10 | 3.72E-11 | 2.35E-06 | 1.00E+00 | 3.62E-01 | 3.02E-01 |
| 179.54127 | 77.27  | 18.26 | 18.24 | 19.23 | 18.07 | 1.31E-06 | 1.00E+00 | 7.02E-05 | 8.35E-01 | 9.21E-05 | 8.83E-01 | 5.52E-06 |
| 179.60615 | 24.53  | 15.15 | 17.19 | 15.92 | 18.17 | 6.81E-24 | 1.86E-12 | 1.87E-02 | 5.30E-14 | 2.30E-05 | 2.76E-03 | 2.04E-13 |
| 179.63008 | 57.29  | 17.12 | 17.28 | 17.06 | 17.05 | 4.73E-01 | 7.36E-01 | 9.79E-01 | 9.71E-01 | 5.14E-01 | 5.03E-01 | 1.00E+00 |
| 179.95369 | 254.67 | 17.27 | 15.43 | 15.60 | 15.93 | 1.57E-15 | 1.41E-13 | 5.45E-12 | 1.02E-07 | 8.72E-01 | 1.38E-01 | 4.79E-01 |

|           |        |       |       |       |       |          |          |          |          |          |          |          |
|-----------|--------|-------|-------|-------|-------|----------|----------|----------|----------|----------|----------|----------|
| 179.95374 | 128.43 | 18.08 | 16.43 | 17.81 | 16.64 | 9.22E-21 | 7.36E-14 | 4.15E-01 | 1.01E-12 | 8.12E-12 | 6.97E-01 | 1.32E-08 |
| 179.96193 | 253.73 | 17.62 | 15.75 | 15.79 | 15.87 | 5.11E-16 | 1.04E-12 | 1.78E-12 | 6.38E-11 | 9.99E-01 | 9.65E-01 | 9.89E-01 |
| 179.962   | 129.61 | 17.94 | 16.89 | 18.16 | 17.09 | 8.47E-14 | 2.47E-08 | 5.45E-01 | 1.51E-05 | 3.80E-11 | 6.89E-01 | 5.43E-08 |
| 179.9677  | 92.3   | 16.78 | 16.60 | 16.59 | 16.55 | 5.86E-01 | 7.49E-01 | 7.18E-01 | 5.89E-01 | 1.00E+00 | 9.93E-01 | 9.95E-01 |
| 179.97343 | 109.23 | 20.38 | 18.73 | 19.71 | 18.81 | 7.69E-31 | 3.72E-14 | 4.70E-06 | 4.54E-14 | 4.93E-11 | 9.45E-01 | 3.43E-09 |
| 179.98231 | 97.4   | 18.15 | 21.94 | 21.08 | 21.04 | 5.92E-40 | 3.65E-14 | 3.70E-14 | 4.03E-14 | 2.72E-03 | 2.13E-03 | 9.98E-01 |
| 179.98555 | 152.5  | 19.19 | 15.10 | 14.22 | 16.67 | 4.84E-40 | 3.65E-14 | 3.65E-14 | 8.37E-13 | 3.08E-02 | 2.15E-05 | 9.68E-12 |
| 179.9907  | 94.63  | 22.59 | 24.95 | 25.39 | 24.34 | 2.96E-17 | 3.25E-12 | 7.49E-14 | 5.02E-07 | 4.96E-01 | 2.42E-01 | 6.95E-03 |
| 180.00334 | 62.59  | 17.69 | 14.60 | 16.89 | 15.94 | 8.58E-18 | 7.32E-14 | 5.40E-02 | 1.20E-06 | 1.81E-10 | 5.75E-04 | 2.58E-02 |
| 180.0157  | 286.51 | 15.49 | 16.84 | 16.99 | 16.20 | 1.83E-04 | 1.59E-03 | 3.12E-04 | 2.42E-01 | 9.81E-01 | 3.43E-01 | 1.72E-01 |
| 180.01646 | 88.6   | 14.78 | 13.29 | 13.69 | 14.40 | 1.43E-02 | 1.44E-02 | 1.17E-01 | 8.75E-01 | 8.55E-01 | 1.46E-01 | 5.19E-01 |
| 180.02218 | 48.35  | 16.82 | 14.21 | 14.96 | 15.04 | 1.73E-18 | 7.52E-14 | 9.95E-11 | 2.18E-09 | 2.99E-02 | 1.73E-02 | 9.92E-01 |
| 180.04606 | 62.87  | 15.76 | 14.91 | 13.71 | 14.69 | 8.09E-07 | 8.05E-02 | 1.19E-07 | 1.80E-02 | 6.27E-03 | 9.31E-01 | 4.77E-02 |
| 180.05179 | 187.78 | 12.96 | 14.80 | 14.28 | 15.01 | 1.36E-06 | 2.82E-05 | 4.58E-03 | 4.86E-06 | 5.63E-01 | 9.61E-01 | 2.93E-01 |
| 180.05183 | 64.24  | 17.74 | 18.65 | 18.44 | 17.79 | 6.79E-03 | 1.72E-02 | 1.05E-01 | 9.99E-01 | 9.00E-01 | 4.20E-02 | 1.91E-01 |
| 180.06545 | 276.4  | 19.33 | 17.97 | 16.79 | 16.70 | 3.72E-17 | 7.12E-05 | 1.04E-13 | 1.05E-13 | 1.14E-03 | 6.30E-04 | 9.92E-01 |
| 180.07667 | 291.91 | 17.64 | 16.49 | 16.32 | 16.26 | 2.87E-10 | 1.99E-06 | 2.70E-08 | 2.05E-08 | 8.69E-01 | 7.51E-01 | 9.94E-01 |
| 180.08665 | 208.44 | 17.01 | 13.80 | 13.95 | 14.66 | 4.43E-53 | 3.65E-14 | 3.65E-14 | 3.65E-14 | 8.18E-01 | 2.01E-05 | 5.94E-04 |
| 180.0867  | 84.67  | 17.81 | 16.19 | 16.22 | 16.97 | 1.55E-22 | 7.47E-14 | 7.32E-14 | 5.36E-06 | 9.99E-01 | 4.83E-05 | 7.68E-05 |
| 180.09884 | 227.77 | 14.52 | 11.72 | 11.26 | 12.76 | 1.42E-23 | 7.56E-14 | 5.74E-14 | 1.56E-07 | 4.33E-01 | 6.18E-03 | 1.73E-05 |
| 180.10162 | 283.6  | 16.84 | 15.58 | 15.88 | 15.79 | 1.76E-07 | 3.83E-07 | 1.33E-04 | 5.25E-05 | 5.77E-01 | 8.16E-01 | 9.84E-01 |
| 180.13825 | 197.24 | 16.70 | 14.64 | 14.71 | 15.10 | 2.93E-34 | 3.65E-14 | 3.65E-14 | 7.27E-14 | 9.77E-01 | 2.91E-02 | 7.68E-02 |
| 180.1464  | 197.86 | 16.06 | 11.09 | 12.62 | 12.61 | 3.92E-20 | 7.12E-14 | 3.34E-11 | 1.26E-10 | 1.02E-02 | 1.53E-02 | 1.00E+00 |
| 180.46498 | 102.46 | 15.26 | 17.02 | 16.02 | 16.15 | 7.53E-14 | 7.83E-14 | 9.76E-04 | 1.39E-04 | 1.59E-05 | 4.06E-04 | 9.28E-01 |
| 180.50604 | 80.68  | 17.12 | 15.09 | 14.30 | 16.46 | 4.27E-14 | 1.95E-07 | 4.00E-13 | 2.74E-01 | 1.32E-01 | 1.77E-03 | 1.22E-07 |
| 180.52203 | 95.42  | 19.64 | 19.91 | 20.49 | 19.48 | 2.27E-06 | 4.92E-01 | 5.31E-05 | 8.17E-01 | 1.51E-02 | 1.30E-01 | 3.49E-06 |
| 180.57555 | 26.42  | 16.05 | 17.46 | 14.59 | 14.71 | 1.76E-81 | 3.65E-14 | 3.65E-14 | 3.65E-14 | 3.65E-14 | 3.65E-14 | 6.44E-01 |
| 180.59578 | 24.69  | 14.78 | 15.69 | 13.57 | 17.56 | 5.51E-24 | 2.54E-02 | 1.14E-03 | 9.99E-14 | 4.67E-09 | 5.88E-07 | 4.07E-14 |
| 180.90398 | 104.89 | 14.08 | 18.77 | 16.10 | 18.47 | 4.36E-23 | 7.25E-14 | 5.86E-05 | 7.49E-14 | 1.45E-07 | 9.27E-01 | 6.17E-06 |
| 180.95745 | 93.96  | 17.13 | 11.25 | 14.55 | 11.64 | 7.14E-16 | 1.37E-13 | 1.71E-03 | 6.83E-12 | 5.05E-05 | 9.53E-01 | 6.88E-04 |
| 180.9664  | 39.75  | 16.66 | 18.58 | 17.16 | 16.95 | 8.00E-14 | 2.01E-13 | 1.42E-01 | 6.26E-01 | 7.26E-08 | 2.13E-09 | 8.30E-01 |
| 180.97473 | 86.24  | 15.48 | 19.09 | 19.20 | 18.08 | 1.77E-34 | 3.65E-14 | 3.65E-14 | 7.32E-14 | 9.81E-01 | 3.81E-03 | 8.95E-04 |
| 180.98904 | 70.68  | 19.87 | 21.87 | 22.21 | 21.38 | 5.69E-21 | 7.80E-14 | 7.16E-14 | 5.18E-09 | 4.69E-01 | 1.82E-01 | 3.63E-03 |
| 180.99758 | 90.64  | 13.94 | 13.52 | 14.72 | 13.87 | 1.47E-01 | 8.41E-01 | 4.24E-01 | 9.99E-01 | 1.05E-01 | 9.15E-01 | 3.98E-01 |
| 181.0094  | 51.4   | 18.49 | 15.46 | 17.38 | 17.29 | 3.07E-19 | 6.94E-14 | 7.21E-04 | 3.82E-04 | 2.63E-09 | 4.12E-08 | 9.91E-01 |
| 181.01552 | 101.96 | 16.43 | 15.03 | 15.81 | 15.43 | 2.01E-05 | 9.23E-06 | 1.21E-01 | 3.65E-03 | 3.99E-02 | 5.55E-01 | 5.74E-01 |
| 181.01802 | 33.46  | 17.03 | 16.71 | 16.41 | 15.60 | 6.82E-05 | 6.90E-01 | 1.54E-01 | 2.59E-05 | 7.69E-01 | 2.86E-03 | 4.66E-02 |
| 181.02378 | 94.56  | 16.57 | 15.33 | 16.19 | 15.40 | 1.41E-12 | 2.15E-10 | 1.30E-01 | 4.32E-09 | 2.82E-05 | 9.87E-01 | 1.96E-04 |
| 181.0408  | 94.11  | 13.57 | 15.02 | 14.74 | 14.58 | 2.75E-02 | 2.40E-02 | 9.34E-02 | 2.14E-01 | 9.51E-01 | 8.46E-01 | 9.90E-01 |
| 181.04376 | 195.1  | 12.28 | 13.95 | 13.60 | 14.20 | 4.20E-05 | 5.72E-04 | 9.64E-03 | 8.39E-05 | 8.48E-01 | 9.44E-01 | 5.28E-01 |
| 181.04444 | 65.91  | 17.65 | 18.10 | 17.75 | 17.55 | 1.20E-01 | 2.08E-01 | 9.74E-01 | 9.72E-01 | 4.40E-01 | 1.08E-01 | 8.41E-01 |
| 181.04957 | 112.07 | 17.04 | 14.73 | 15.29 | 14.81 | 2.84E-16 | 1.23E-13 | 5.69E-09 | 1.19E-12 | 2.05E-01 | 9.92E-01 | 3.61E-01 |
| 181.05326 | 35.85  | 15.36 | 16.27 | 15.88 | 17.77 | 1.92E-11 | 1.91E-02 | 3.38E-01 | 6.08E-12 | 6.00E-01 | 4.89E-05 | 1.25E-07 |
| 181.06078 | 227.78 | 16.86 | 16.54 | 16.70 | 16.66 | 1.46E-01 | 9.34E-02 | 6.39E-01 | 5.14E-01 | 6.68E-01 | 8.21E-01 | 9.96E-01 |
| 181.07187 | 291.51 | 18.87 | 19.79 | 19.31 | 19.25 | 1.32E-01 | 7.86E-02 | 6.40E-01 | 7.65E-01 | 6.22E-01 | 5.44E-01 | 9.98E-01 |
| 181.08585 | 22.6   | 16.89 | 13.50 | 14.44 | 15.14 | 3.69E-36 | 3.65E-14 | 5.10E-14 | 1.89E-12 | 2.58E-04 | 1.25E-10 | 1.32E-02 |
| 181.08591 | 174.3  | 17.28 | 15.16 | 15.13 | 15.82 | 9.36E-25 | 6.83E-14 | 6.56E-14 | 1.17E-10 | 9.99E-01 | 1.18E-02 | 6.70E-03 |
| 181.09711 | 286.77 | 17.32 | 15.83 | 15.66 | 15.95 | 9.06E-15 | 8.69E-11 | 4.77E-13 | 6.80E-09 | 8.61E-01 | 9.43E-01 | 5.42E-01 |
| 181.0972  | 150.13 | 18.51 | 15.72 | 16.23 | 16.63 | 4.74E-35 | 3.65E-14 | 3.90E-14 | 7.56E-14 | 5.18E-02 | 6.54E-05 | 1.83E-01 |
| 181.10284 | 49.55  | 16.45 | 15.83 | 16.69 | 16.42 | 3.69E-04 | 9.94E-03 | 6.04E-01 | 9.99E-01 | 1.68E-04 | 2.61E-02 | 5.54E-01 |
| 181.10645 | 20.21  | 16.09 | 15.67 | 14.19 | 16.17 | 1.14E-06 | 6.93E-01 | 6.59E-06 | 9.96E-01 | 1.16E-03 | 5.98E-01 | 9.11E-06 |
| 181.12218 | 24.46  | 17.95 | 16.68 | 17.12 | 17.51 | 5.46E-20 | 7.16E-14 | 3.49E-10 | 2.95E-03 | 2.88E-03 | 4.33E-09 | 1.32E-02 |
| 181.12221 | 291.46 | 19.15 | 17.50 | 17.65 | 18.07 | 2.74E-07 | 9.40E-07 | 7.84E-06 | 3.82E-03 | 9.64E-01 | 2.86E-01 | 5.47E-01 |
| 181.15862 | 286.6  | 17.55 | 16.25 | 16.41 | 16.48 | 8.22E-11 | 1.09E-09 | 7.18E-08 | 1.29E-06 | 8.54E-01 | 6.73E-01 | 9.85E-01 |
| 181.3611  | 250.34 | 15.27 | 14.72 | 15.19 | 15.03 | 2.45E-01 | 2.14E-01 | 9.92E-01 | 8.38E-01 | 3.71E-01 | 7.34E-01 | 9.49E-01 |
| 181.50739 | 103.05 | 17.86 | 13.20 | 13.26 | 13.51 | 2.75E-20 | 7.42E-14 | 7.38E-14 | 1.72E-13 | 9.99E-01 | 9.40E-01 | 9.68E-01 |
| 181.52504 | 87.73  | 15.97 | 16.05 | 16.05 | 16.16 | 9.55E-01 | 9.94E-01 | 9.95E-01 | 9.39E-01 | 1.00E+00 | 9.89E-01 | 9.87E-01 |
| 181.5386  | 89.57  | 16.22 | 18.10 | 18.20 | 17.48 | 2.83E-23 | 7.24E-14 | 6.85E-14 | 2.99E-09 | 9.53E-01 | 1.27E-02 | 2.11E-03 |
| 181.56991 | 81.52  | 15.23 | 15.48 | 15.56 | 15.59 | 5.96E-01 | 8.19E-01 | 6.60E-01 | 6.22E-01 | 9.94E-01 | 9.85E-01 | 1.00E+00 |
| 181.95057 | 262.24 | 19.19 | 17.80 | 17.24 | 18.07 | 5.85E-13 | 1.95E-07 | 2.61E-13 | 6.94E-05 | 1.09E-01 | 7.10E-01 | 6.41E-03 |
| 181.9758  | 87.72  | 12.98 | 14.57 | 15.19 | 14.27 | 4.68E-06 | 1.17E-03 | 1.83E-06 | 1.71E-02 | 4.88E-01 | 9.04E-01 | 1.65E-01 |
| 181.97949 | 83.48  | 20.40 | 20.62 | 21.08 | 20.20 | 2.39E-02 | 8.74E-01 | 7.88E-02 | 9.01E-01 | 3.86E-01 | 5.12E-01 | 1.86E-02 |
| 181.99495 | 87.86  | 16.50 | 17.91 | 18.73 | 17.67 | 2.97E-20 | 6.36E-10 | 6.45E-14 | 6.39E-07 | 9.49E-04 | 7.02E-01 | 1.54E-05 |
| 182.00086 | 72.54  | 14.31 | 15.19 | 15.64 | 14.36 | 2.66E-03 | 1.36E-01 | 5.86E-03 | 1.00E+00 | 6.96E-01 | 2.12E-01 | 1.46E-02 |
| 182.00635 | 90.96  | 15.86 | 16.43 | 17.10 | 16.17 | 1.30E-09 | 1.12E-02 | 3.72E-10 | 3.62E-01 | 2.12E-03 | 5.28E-01 | 1.15E-05 |
| 182.02325 | 97.18  | 18.81 | 17.56 | 18.50 | 17.64 | 2.18E-10 | 2.10E-08 | 4.09E-01 | 3.32E-07 | 6.22E-05 | 9.84E-01 | 4.33E-04 |
| 182.02737 | 85.12  | 17.22 | 17.61 | 17.37 | 17.29 | 6.82E-02 | 4.64E-02 | 7.32E-01 | 9.55E-01 | 4.04E-01 | 2.02E-01 | 9.66E-01 |
| 182.03248 | 87.69  | 17.27 | 18.29 | 17.77 | 17.68 | 3.20E-06 | 5.09E-07 | 3.30E-02 | 1.46E-01 | 3.20E-02 | 9.52E-03 | 9.58E-01 |

|           |        |       |       |       |       |          |          |          |          |          |          |          |
|-----------|--------|-------|-------|-------|-------|----------|----------|----------|----------|----------|----------|----------|
| 182.05743 | 131.36 | 14.76 | 16.23 | 16.62 | 15.98 | 5.70E-12 | 8.12E-08 | 6.62E-12 | 2.02E-05 | 4.11E-01 | 7.77E-01 | 6.75E-02 |
| 182.05775 | 47.71  | 21.81 | 22.74 | 22.30 | 22.32 | 1.07E-08 | 1.16E-09 | 2.72E-03 | 2.57E-03 | 1.18E-02 | 2.39E-02 | 9.99E-01 |
| 182.06972 | 29.59  | 15.29 | 16.34 | 10.26 | 10.90 | 2.36E-42 | 5.03E-02 | 3.70E-14 | 7.03E-14 | 3.65E-14 | 3.67E-14 | 4.33E-01 |
| 182.07526 | 29.87  | 15.77 | 10.62 | 10.91 | 11.49 | 8.14E-43 | 3.65E-14 | 3.65E-14 | 3.67E-14 | 8.18E-01 | 5.89E-02 | 3.30E-01 |
| 182.07536 | 182.72 | 17.34 | 13.98 | 14.07 | 14.76 | 2.42E-43 | 3.65E-14 | 3.65E-14 | 4.05E-14 | 9.77E-01 | 3.78E-03 | 1.26E-02 |
| 182.08113 | 53.3   | 24.77 | 23.82 | 24.32 | 24.14 | 6.04E-26 | 3.70E-14 | 3.70E-08 | 3.88E-13 | 5.32E-09 | 4.01E-04 | 1.38E-01 |
| 182.09235 | 286.34 | 17.24 | 15.81 | 15.75 | 15.85 | 1.56E-18 | 1.34E-13 | 7.80E-14 | 1.08E-12 | 9.88E-01 | 9.96E-01 | 9.46E-01 |
| 182.09242 | 161.98 | 18.09 | 15.73 | 16.02 | 16.42 | 2.11E-29 | 3.70E-14 | 5.67E-14 | 8.25E-14 | 4.25E-01 | 3.26E-03 | 1.80E-01 |
| 182.11753 | 265.57 | 17.41 | 15.77 | 16.07 | 16.41 | 1.38E-15 | 7.98E-14 | 6.51E-11 | 3.71E-06 | 4.11E-01 | 7.63E-03 | 3.00E-01 |
| 182.12559 | 197.71 | 16.61 | 12.11 | 12.18 | 13.70 | 6.77E-25 | 6.56E-14 | 6.67E-14 | 6.95E-10 | 9.98E-01 | 2.23E-03 | 3.50E-03 |
| 182.15397 | 201.83 | 16.07 | 12.83 | 13.30 | 13.30 | 7.78E-16 | 1.26E-13 | 5.90E-11 | 2.68E-10 | 6.36E-01 | 6.56E-01 | 1.00E+00 |
| 182.49356 | 89.12  | 15.47 | 15.34 | 15.82 | 15.34 | 5.75E-01 | 9.87E-01 | 7.89E-01 | 9.85E-01 | 6.09E-01 | 1.00E+00 | 6.16E-01 |
| 182.51009 | 84.67  | 16.60 | 16.93 | 17.64 | 17.35 | 3.26E-04 | 5.51E-01 | 2.46E-04 | 2.09E-02 | 3.23E-02 | 3.98E-01 | 6.89E-01 |
| 182.5243  | 107.39 | 17.25 | 19.16 | 18.01 | 18.19 | 8.51E-10 | 8.02E-11 | 2.37E-02 | 3.90E-03 | 2.23E-04 | 4.25E-03 | 9.12E-01 |
| 182.52791 | 70.32  | 16.51 | 15.30 | 15.23 | 15.24 | 1.01E-03 | 7.65E-03 | 3.65E-03 | 6.35E-03 | 9.98E-01 | 9.99E-01 | 1.00E+00 |
| 182.53523 | 199.8  | 17.00 | 17.46 | 18.35 | 18.91 | 9.97E-11 | 3.37E-01 | 7.28E-06 | 4.61E-10 | 8.91E-03 | 5.67E-06 | 1.99E-01 |
| 182.9618  | 250.68 | 19.30 | 16.32 | 15.95 | 16.96 | 2.89E-40 | 3.65E-14 | 3.65E-14 | 6.96E-14 | 3.16E-01 | 2.85E-02 | 6.54E-05 |
| 182.96822 | 56.83  | 17.11 | 11.55 | 12.74 | 12.70 | 5.94E-56 | 3.65E-14 | 3.65E-14 | 3.65E-14 | 1.41E-04 | 4.43E-04 | 9.99E-01 |
| 182.97236 | 88.25  | 14.28 | 15.48 | 15.86 | 14.67 | 1.34E-04 | 8.88E-03 | 2.02E-04 | 7.45E-01 | 7.63E-01 | 1.79E-01 | 1.57E-02 |
| 182.98153 | 86.62  | 15.66 | 20.72 | 20.88 | 19.13 | 9.52E-62 | 3.65E-14 | 3.65E-14 | 3.65E-14 | 9.27E-01 | 2.00E-08 | 5.32E-10 |
| 182.98506 | 289.46 | 20.17 | 16.13 | 15.51 | 17.46 | 3.14E-45 | 3.65E-14 | 3.65E-14 | 7.49E-14 | 1.09E-01 | 3.23E-05 | 3.08E-10 |
| 183.00623 | 47.13  | 17.39 | 18.98 | 17.49 | 17.26 | 1.04E-15 | 1.17E-12 | 9.60E-01 | 9.30E-01 | 6.26E-11 | 4.98E-13 | 7.14E-01 |
| 183.01128 | 275.3  | 14.85 | 18.13 | 18.96 | 17.32 | 3.12E-28 | 7.23E-14 | 3.67E-14 | 1.62E-11 | 6.49E-02 | 8.97E-02 | 1.75E-05 |
| 183.03065 | 84.92  | 16.66 | 16.57 | 16.53 | 16.98 | 4.82E-02 | 9.42E-01 | 8.36E-01 | 2.39E-01 | 9.94E-01 | 8.79E-02 | 4.48E-02 |
| 183.03691 | 206.61 | 17.07 | 19.06 | 18.97 | 19.08 | 6.56E-17 | 4.93E-13 | 2.64E-12 | 8.45E-13 | 9.84E-01 | 1.00E+00 | 9.69E-01 |
| 183.04335 | 71.45  | 17.65 | 16.61 | 16.98 | 16.99 | 1.32E-14 | 7.63E-14 | 2.20E-07 | 8.30E-07 | 1.39E-02 | 1.56E-02 | 1.00E+00 |
| 183.04702 | 75.05  | 17.33 | 14.44 | 15.45 | 15.46 | 3.29E-14 | 8.24E-14 | 2.78E-07 | 9.52E-07 | 1.96E-02 | 2.25E-02 | 1.00E+00 |
| 183.05029 | 84.31  | 16.93 | 18.55 | 18.59 | 18.47 | 4.50E-20 | 7.69E-14 | 7.45E-14 | 2.02E-13 | 9.96E-01 | 9.81E-01 | 9.27E-01 |
| 183.06128 | 36.98  | 18.03 | 18.80 | 18.10 | 18.37 | 1.31E-05 | 1.85E-05 | 9.78E-01 | 1.73E-01 | 1.59E-04 | 5.77E-02 | 3.66E-01 |
| 183.06518 | 216.54 | 15.55 | 12.45 | 12.29 | 13.39 | 3.80E-11 | 5.35E-09 | 5.67E-10 | 1.16E-04 | 9.88E-01 | 2.66E-01 | 1.39E-01 |
| 183.07818 | 52.39  | 25.06 | 24.60 | 24.89 | 24.32 | 1.02E-03 | 6.92E-02 | 7.91E-01 | 8.10E-04 | 4.35E-01 | 4.81E-01 | 2.04E-02 |
| 183.08431 | 58.92  | 21.18 | 20.29 | 20.90 | 20.57 | 1.12E-25 | 3.87E-14 | 1.40E-03 | 5.16E-13 | 2.71E-13 | 2.25E-03 | 1.51E-04 |
| 183.10149 | 281.96 | 18.09 | 16.89 | 16.86 | 16.84 | 9.20E-10 | 2.85E-07 | 1.21E-07 | 2.16E-07 | 1.00E+00 | 9.97E-01 | 1.00E+00 |
| 183.11278 | 213.87 | 16.88 | 14.75 | 14.94 | 15.18 | 7.34E-37 | 3.65E-14 | 3.65E-14 | 5.61E-14 | 5.76E-01 | 3.35E-02 | 4.32E-01 |
| 183.11662 | 23.92  | 16.06 | 10.94 | 12.79 | 14.34 | 2.30E-25 | 3.83E-14 | 1.28E-12 | 5.47E-04 | 1.55E-04 | 4.42E-12 | 3.13E-03 |
| 183.13786 | 290.5  | 17.46 | 16.51 | 16.48 | 16.42 | 4.53E-06 | 1.96E-04 | 9.75E-05 | 5.79E-05 | 9.99E-01 | 9.80E-01 | 9.93E-01 |
| 183.14919 | 56.91  | 16.45 | 16.85 | 16.60 | 16.12 | 1.78E-02 | 2.64E-01 | 8.93E-01 | 4.42E-01 | 6.92E-01 | 9.26E-03 | 1.47E-01 |
| 183.17432 | 203.93 | 16.40 | 13.38 | 13.46 | 14.87 | 1.35E-19 | 7.42E-14 | 7.49E-14 | 5.20E-05 | 9.96E-01 | 1.52E-04 | 3.07E-04 |
| 183.50118 | 95.59  | 16.14 | 14.67 | 16.14 | 14.31 | 5.58E-08 | 3.49E-04 | 1.00E+00 | 8.14E-06 | 4.73E-04 | 7.78E-01 | 1.24E-05 |
| 183.50892 | 89.17  | 15.16 | 14.64 | 15.40 | 15.19 | 3.31E-02 | 1.73E-01 | 7.84E-01 | 9.99E-01 | 2.06E-02 | 1.75E-01 | 8.65E-01 |
| 183.51603 | 58.9   | 18.15 | 14.98 | 14.71 | 15.55 | 1.21E-19 | 7.93E-14 | 7.56E-14 | 2.31E-10 | 8.87E-01 | 4.56E-01 | 1.28E-01 |
| 183.53211 | 99.55  | 18.77 | 20.85 | 20.65 | 19.78 | 1.11E-09 | 8.31E-09 | 1.65E-07 | 1.65E-02 | 9.31E-01 | 1.25E-02 | 6.00E-02 |
| 183.53818 | 71.41  | 17.13 | 16.10 | 16.53 | 16.83 | 9.95E-05 | 4.32E-05 | 3.61E-02 | 5.64E-01 | 2.48E-01 | 1.25E-02 | 5.72E-02 |
| 183.53861 | 193.23 | 14.80 | 14.84 | 15.46 | 15.45 | 1.04E-02 | 9.99E-01 | 4.71E-02 | 6.91E-02 | 8.41E-02 | 1.15E-01 | 1.00E+00 |
| 183.55125 | 84.15  | 14.34 | 15.77 | 15.70 | 15.55 | 1.19E-07 | 1.42E-06 | 4.00E-06 | 1.04E-04 | 9.94E-01 | 8.62E-01 | 9.49E-01 |
| 183.60108 | 25.24  | 12.40 | 15.38 | 11.57 | 15.66 | 9.78E-25 | 7.16E-12 | 1.51E-01 | 4.16E-13 | 7.48E-14 | 9.11E-01 | 7.51E-14 |
| 183.97527 | 295.87 | 16.59 | 14.32 | 13.65 | 16.03 | 1.93E-13 | 1.58E-07 | 6.97E-12 | 5.08E-01 | 3.45E-01 | 3.29E-04 | 1.64E-07 |
| 183.98237 | 86.65  | 10.25 | 15.53 | 14.99 | 13.37 | 4.13E-12 | 4.10E-11 | 2.02E-09 | 2.52E-04 | 8.90E-01 | 2.79E-02 | 1.47E-01 |
| 184.01323 | 52.01  | 16.73 | 12.98 | 16.38 | 14.55 | 2.16E-12 | 2.77E-11 | 9.01E-01 | 2.85E-04 | 3.57E-09 | 2.14E-02 | 4.45E-03 |
| 184.02776 | 131.88 | 15.56 | 15.49 | 15.88 | 14.99 | 3.42E-02 | 9.95E-01 | 6.82E-01 | 2.00E-01 | 5.59E-01 | 3.31E-01 | 1.68E-02 |
| 184.02809 | 29.08  | 13.69 | 18.93 | 18.66 | 18.25 | 2.42E-36 | 3.65E-14 | 3.65E-14 | 4.30E-14 | 8.97E-01 | 3.38E-01 | 7.44E-01 |
| 184.05612 | 48.81  | 17.99 | 18.70 | 18.22 | 18.21 | 8.01E-05 | 2.47E-05 | 4.27E-01 | 4.97E-01 | 1.04E-02 | 1.18E-02 | 1.00E+00 |
| 184.06044 | 26.58  | 16.17 | 10.06 | 11.30 | 12.40 | 4.71E-36 | 3.65E-14 | 3.87E-14 | 7.37E-14 | 1.73E-02 | 9.30E-07 | 5.27E-02 |
| 184.07315 | 26.89  | 20.22 | 21.39 | 20.95 | 20.81 | 1.82E-12 | 3.13E-13 | 3.84E-06 | 4.76E-04 | 1.88E-02 | 1.27E-03 | 7.97E-01 |
| 184.07316 | 276.18 | 21.35 | 25.30 | 24.18 | 24.09 | 2.79E-11 | 1.99E-11 | 1.42E-06 | 7.14E-06 | 1.76E-01 | 1.49E-01 | 9.99E-01 |
| 184.08155 | 53.01  | 21.58 | 21.31 | 21.53 | 20.85 | 9.15E-04 | 4.66E-01 | 9.93E-01 | 9.40E-04 | 6.55E-01 | 9.19E-02 | 3.25E-03 |
| 184.09665 | 287.38 | 20.08 | 17.37 | 14.25 | 18.35 | 1.63E-27 | 4.42E-08 | 3.65E-14 | 1.35E-03 | 6.25E-10 | 1.70E-01 | 7.98E-14 |
| 184.10072 | 23.75  | 15.82 | 17.58 | 14.03 | 18.35 | 1.89E-24 | 2.00E-05 | 1.01E-05 | 1.05E-09 | 7.47E-14 | 1.96E-01 | 5.36E-14 |
| 184.10651 | 209.1  | 15.61 | 10.27 | 11.30 | 11.07 | 3.57E-29 | 3.72E-14 | 7.43E-14 | 7.27E-14 | 9.24E-02 | 2.90E-01 | 9.60E-01 |
| 184.11128 | 24.82  | 15.93 | 19.13 | 15.88 | 18.82 | 1.22E-15 | 1.36E-10 | 9.99E-01 | 1.56E-08 | 1.81E-10 | 9.19E-01 | 1.79E-08 |
| 184.13315 | 155.24 | 17.74 | 15.64 | 15.97 | 16.27 | 8.32E-16 | 8.14E-14 | 2.61E-11 | 8.35E-08 | 5.46E-01 | 7.49E-02 | 6.58E-01 |
| 184.49496 | 267.94 | 16.02 | 15.26 | 16.25 | 15.91 | 8.80E-02 | 2.07E-01 | 9.34E-01 | 9.93E-01 | 6.48E-02 | 3.89E-01 | 8.42E-01 |
| 184.50433 | 88.37  | 15.66 | 15.19 | 16.02 | 14.93 | 3.84E-04 | 2.69E-01 | 4.97E-01 | 3.21E-02 | 1.06E-02 | 7.75E-01 | 4.64E-04 |
| 184.51627 | 60.51  | 17.32 | 12.52 | 14.10 | 14.42 | 9.21E-19 | 7.17E-14 | 3.51E-10 | 5.51E-08 | 6.87E-03 | 1.02E-03 | 9.12E-01 |
| 184.53506 | 82.13  | 17.07 | 15.71 | 16.76 | 16.12 | 2.39E-03 | 2.46E-03 | 8.39E-01 | 7.31E-02 | 3.92E-02 | 7.44E-01 | 3.82E-01 |
| 184.54849 | 91.74  | 16.47 | 16.08 | 16.06 | 15.84 | 2.40E-03 | 7.98E-02 | 6.17E-02 | 1.16E-03 | 1.00E+00 | 5.05E-01 | 5.46E-01 |
| 184.5548  | 74.27  | 17.62 | 16.50 | 16.49 | 16.69 | 2.36E-22 | 7.35E-14 | 7.22E-14 | 7.75E-13 | 1.00E+00 | 4.26E-01 | 3.59E-01 |
| 184.60241 | 23.79  | 13.93 | 14.91 | 12.26 | 16.13 | 3.77E-22 | 1.80E-02 | 4.39E-06 | 3.48E-09 | 1.38E-12 | 3.24E-03 | 5.50E-14 |

|           |        |       |       |       |       |          |          |          |          |          |          |          |
|-----------|--------|-------|-------|-------|-------|----------|----------|----------|----------|----------|----------|----------|
| 184.61296 | 24.5   | 14.97 | 16.54 | 14.20 | 16.83 | 2.46E-15 | 1.19E-05 | 7.48E-02 | 3.03E-07 | 9.27E-11 | 8.25E-01 | 1.46E-12 |
| 184.87409 | 112.71 | 16.34 | 16.01 | 17.29 | 15.43 | 2.41E-10 | 5.38E-01 | 8.20E-04 | 2.33E-03 | 5.42E-06 | 1.24E-01 | 7.28E-11 |
| 184.96958 | 91.59  | 17.52 | 19.23 | 19.97 | 19.00 | 2.54E-16 | 4.90E-09 | 7.58E-14 | 8.18E-07 | 3.20E-02 | 8.61E-01 | 3.35E-03 |
| 184.97784 | 67.4   | 16.25 | 17.37 | 18.55 | 16.87 | 1.98E-38 | 7.39E-13 | 3.65E-14 | 1.56E-04 | 2.79E-13 | 5.62E-03 | 5.18E-14 |
| 184.98553 | 138.2  | 18.48 | 14.76 | 13.91 | 16.78 | 6.55E-57 | 3.65E-14 | 3.65E-14 | 7.50E-12 | 1.16E-03 | 7.98E-14 | 3.72E-14 |
| 184.99608 | 89.06  | 20.28 | 23.42 | 23.64 | 22.83 | 2.32E-23 | 7.52E-14 | 6.85E-14 | 2.27E-12 | 9.09E-01 | 3.05E-01 | 7.86E-02 |
| 185.00059 | 55.4   | 19.07 | 17.04 | 18.52 | 16.68 | 1.50E-14 | 1.48E-09 | 2.74E-01 | 5.35E-12 | 2.34E-05 | 6.95E-01 | 2.09E-07 |
| 185.02341 | 86.83  | 18.24 | 16.39 | 16.90 | 17.22 | 6.62E-13 | 3.77E-13 | 8.82E-08 | 1.40E-04 | 1.35E-01 | 4.12E-03 | 5.44E-01 |
| 185.03221 | 71.45  | 21.02 | 21.73 | 21.89 | 21.57 | 8.98E-05 | 2.14E-03 | 7.09E-05 | 3.45E-02 | 8.51E-01 | 8.71E-01 | 4.05E-01 |
| 185.0396  | 40.96  | 16.55 | 12.24 | 15.76 | 13.36 | 1.57E-20 | 7.54E-14 | 2.73E-01 | 1.33E-10 | 1.57E-12 | 8.09E-02 | 2.85E-06 |
| 185.04384 | 77.98  | 16.46 | 16.28 | 16.55 | 16.33 | 6.38E-01 | 8.55E-01 | 9.74E-01 | 9.46E-01 | 6.33E-01 | 9.96E-01 | 7.83E-01 |
| 185.04836 | 24.5   | 13.34 | 15.79 | 13.11 | 16.84 | 6.94E-21 | 9.05E-09 | 9.32E-01 | 7.84E-14 | 8.14E-10 | 5.52E-02 | 7.43E-14 |
| 185.07046 | 108.93 | 19.62 | 20.42 | 20.33 | 19.90 | 7.56E-08 | 5.13E-07 | 9.06E-06 | 2.20E-01 | 9.23E-01 | 4.97E-03 | 2.99E-02 |
| 185.07656 | 277.66 | 16.79 | 21.01 | 18.21 | 19.61 | 4.12E-10 | 2.35E-10 | 8.90E-02 | 5.57E-05 | 6.10E-05 | 1.34E-01 | 1.24E-01 |
| 185.07663 | 93.06  | 23.54 | 24.46 | 24.52 | 24.02 | 3.63E-14 | 4.88E-11 | 1.34E-12 | 1.36E-03 | 9.56E-01 | 8.46E-03 | 1.38E-03 |
| 185.08291 | 52.97  | 17.95 | 16.19 | 16.56 | 16.23 | 2.95E-19 | 7.37E-14 | 3.71E-11 | 7.98E-14 | 2.25E-01 | 9.96E-01 | 3.59E-01 |
| 185.09199 | 290.74 | 18.87 | 16.91 | 16.93 | 17.19 | 3.77E-17 | 1.30E-13 | 1.37E-13 | 2.62E-10 | 1.00E+00 | 6.66E-01 | 7.17E-01 |
| 185.09209 | 20.31  | 18.21 | 13.77 | 13.93 | 15.02 | 9.78E-84 | 3.65E-14 | 3.65E-14 | 3.65E-14 | 7.39E-01 | 3.13E-12 | 7.58E-10 |
| 185.09858 | 49.07  | 18.85 | 17.60 | 18.59 | 18.03 | 2.45E-14 | 2.01E-13 | 3.11E-01 | 2.14E-06 | 8.29E-09 | 4.47E-02 | 3.15E-03 |
| 185.10084 | 202.97 | 16.15 | 14.07 | 14.19 | 14.39 | 6.52E-23 | 7.26E-14 | 7.41E-14 | 1.20E-13 | 9.42E-01 | 4.44E-01 | 7.76E-01 |
| 185.10853 | 25.59  | 15.70 | 16.56 | 14.99 | 16.88 | 1.36E-11 | 4.70E-03 | 2.96E-02 | 6.41E-05 | 4.97E-08 | 6.46E-01 | 1.56E-10 |
| 185.11661 | 270.71 | 16.38 | 12.29 | 14.62 | 13.85 | 1.87E-15 | 7.41E-14 | 5.50E-04 | 5.41E-07 | 4.49E-06 | 6.45E-03 | 3.51E-01 |
| 185.12844 | 55.85  | 18.06 | 18.81 | 18.69 | 18.54 | 2.62E-06 | 3.67E-06 | 1.03E-04 | 8.51E-03 | 8.69E-01 | 3.01E-01 | 7.41E-01 |
| 185.12848 | 186.79 | 16.86 | 14.61 | 14.87 | 14.83 | 9.39E-36 | 3.65E-14 | 3.74E-14 | 3.85E-14 | 4.26E-01 | 5.89E-01 | 9.97E-01 |
| 185.13233 | 23.72  | 17.16 | 14.02 | 14.43 | 15.36 | 1.33E-25 | 4.47E-14 | 7.29E-14 | 4.19E-09 | 4.52E-01 | 3.14E-05 | 6.94E-03 |
| 185.15353 | 20.68  | 17.24 | 14.86 | 13.57 | 15.46 | 1.42E-39 | 6.38E-14 | 3.65E-14 | 8.45E-13 | 1.89E-07 | 5.06E-02 | 1.92E-13 |
| 185.15354 | 286.37 | 17.77 | 16.43 | 16.28 | 16.58 | 5.84E-11 | 3.84E-08 | 7.14E-10 | 2.34E-06 | 9.18E-01 | 9.20E-01 | 5.84E-01 |
| 185.49426 | 103.8  | 18.44 | 9.96  | 12.63 | 11.72 | 1.22E-40 | 3.65E-14 | 4.96E-14 | 3.67E-14 | 6.14E-06 | 8.53E-03 | 3.39E-01 |
| 185.51406 | 272.89 | 19.59 | 21.24 | 21.77 | 20.72 | 1.99E-33 | 6.23E-14 | 3.65E-14 | 4.55E-11 | 4.13E-03 | 7.04E-03 | 1.59E-09 |
| 185.52018 | 86.8   | 15.50 | 16.03 | 16.49 | 15.86 | 2.21E-05 | 3.76E-02 | 5.13E-06 | 2.84E-01 | 1.09E-01 | 8.46E-01 | 1.42E-02 |
| 185.54048 | 219.12 | 15.54 | 15.19 | 16.07 | 17.43 | 2.73E-04 | 8.95E-01 | 7.16E-01 | 1.85E-03 | 3.20E-01 | 2.22E-04 | 5.25E-02 |
| 185.5584  | 83.52  | 15.03 | 15.69 | 15.72 | 15.74 | 7.40E-05 | 1.43E-03 | 5.62E-04 | 6.64E-04 | 9.97E-01 | 9.91E-01 | 1.00E+00 |
| 185.62085 | 23.03  | 13.90 | 15.64 | 14.77 | 15.80 | 2.02E-05 | 2.20E-04 | 1.48E-01 | 7.27E-05 | 1.73E-01 | 9.84E-01 | 8.68E-02 |
| 185.63014 | 57.19  | 16.30 | 15.47 | 15.23 | 15.63 | 1.14E-05 | 9.01E-04 | 7.15E-06 | 1.46E-02 | 7.05E-01 | 8.98E-01 | 3.00E-01 |
| 185.94747 | 111.23 | 15.12 | 10.80 | 13.73 | 12.46 | 1.62E-12 | 6.87E-13 | 5.33E-02 | 2.05E-05 | 1.92E-06 | 2.24E-02 | 1.17E-01 |
| 185.95972 | 55.22  | 25.52 | 25.50 | 25.93 | 25.21 | 2.70E-04 | 9.99E-01 | 3.93E-02 | 2.02E-01 | 3.37E-02 | 2.91E-01 | 7.84E-05 |
| 185.98353 | 24.38  | 18.62 | 17.91 | 18.63 | 17.98 | 1.41E-07 | 2.94E-05 | 1.00E+00 | 3.11E-04 | 3.90E-05 | 9.74E-01 | 3.76E-04 |
| 185.99028 | 105.32 | 16.07 | 18.41 | 15.68 | 18.11 | 2.10E-15 | 2.46E-09 | 6.90E-01 | 4.33E-07 | 1.23E-11 | 8.64E-01 | 3.43E-09 |
| 185.99687 | 86.86  | 17.75 | 20.10 | 20.43 | 19.69 | 5.21E-24 | 7.49E-14 | 5.81E-14 | 2.56E-12 | 5.50E-01 | 3.91E-01 | 2.22E-02 |
| 186.00735 | 135.25 | 16.70 | 14.24 | 14.26 | 14.72 | 3.95E-35 | 3.65E-14 | 3.65E-14 | 7.12E-14 | 1.00E+00 | 7.03E-02 | 8.39E-02 |
| 186.008   | 49.11  | 17.10 | 16.52 | 18.20 | 16.77 | 5.58E-14 | 2.08E-02 | 6.49E-07 | 3.69E-01 | 2.38E-13 | 6.44E-01 | 7.02E-10 |
| 186.01608 | 259.13 | 16.77 | 17.46 | 18.20 | 16.98 | 2.41E-17 | 8.14E-05 | 7.53E-14 | 5.62E-01 | 2.77E-05 | 1.92E-02 | 7.31E-12 |
| 186.0357  | 68.7   | 17.13 | 16.62 | 16.78 | 16.71 | 1.65E-02 | 1.43E-02 | 1.57E-01 | 7.38E-02 | 7.88E-01 | 9.58E-01 | 9.78E-01 |
| 186.04215 | 218.72 | 16.83 | 16.55 | 17.89 | 18.05 | 4.02E-04 | 8.97E-01 | 4.19E-02 | 1.85E-02 | 7.23E-03 | 2.97E-03 | 9.82E-01 |
| 186.0499  | 80.41  | 17.00 | 16.12 | 16.27 | 16.60 | 1.49E-03 | 1.46E-03 | 1.18E-02 | 3.44E-01 | 9.22E-01 | 2.34E-01 | 5.69E-01 |
| 186.05877 | 74.65  | 18.29 | 20.38 | 20.53 | 19.99 | 1.11E-29 | 4.76E-14 | 3.72E-14 | 7.42E-14 | 8.49E-01 | 1.87E-01 | 2.68E-02 |
| 186.06429 | 243.13 | 17.61 | 20.30 | 20.39 | 19.82 | 8.56E-26 | 7.07E-14 | 5.85E-14 | 9.58E-14 | 9.87E-01 | 2.79E-01 | 1.45E-01 |
| 186.0657  | 77.02  | 12.54 | 13.37 | 15.70 | 11.56 | 4.73E-12 | 3.76E-01 | 2.27E-08 | 2.58E-01 | 1.13E-04 | 6.14E-03 | 5.41E-12 |
| 186.07594 | 276.29 | 21.35 | 19.96 | 20.31 | 19.74 | 1.66E-04 | 1.58E-03 | 2.90E-02 | 2.59E-04 | 8.01E-01 | 9.47E-01 | 4.77E-01 |
| 186.08554 | 287.92 | 18.59 | 16.83 | 16.82 | 16.26 | 5.90E-18 | 4.69E-11 | 2.41E-11 | 7.38E-14 | 1.00E+00 | 1.31E-01 | 1.37E-01 |
| 186.09138 | 207.05 | 16.30 | 13.67 | 13.93 | 14.07 | 1.96E-19 | 7.38E-14 | 9.83E-14 | 2.84E-12 | 8.08E-01 | 5.51E-01 | 9.68E-01 |
| 186.09502 | 216.27 | 16.75 | 13.06 | 13.01 | 14.27 | 1.19E-34 | 3.65E-14 | 3.65E-14 | 8.16E-14 | 9.98E-01 | 3.31E-04 | 1.41E-04 |
| 186.10593 | 154.55 | 16.50 | 20.09 | 16.01 | 19.72 | 2.54E-14 | 8.65E-09 | 8.27E-01 | 5.53E-07 | 1.84E-10 | 9.28E-01 | 1.56E-08 |
| 186.11238 | 283.06 | 19.38 | 17.38 | 17.31 | 17.56 | 5.90E-18 | 1.38E-13 | 8.16E-14 | 2.42E-11 | 9.93E-01 | 8.86E-01 | 7.50E-01 |
| 186.11715 | 38.14  | 16.75 | 15.77 | 15.78 | 16.29 | 3.45E-02 | 5.62E-02 | 5.66E-02 | 6.57E-01 | 1.00E+00 | 5.74E-01 | 5.83E-01 |
| 186.12206 | 267.9  | 16.41 | 14.36 | 14.70 | 13.75 | 3.65E-14 | 2.92E-09 | 6.45E-07 | 1.69E-13 | 7.22E-01 | 2.59E-01 | 2.29E-02 |
| 186.12694 | 24.27  | 13.84 | 15.36 | 12.52 | 15.64 | 3.47E-16 | 1.76E-04 | 1.42E-03 | 1.13E-05 | 1.95E-12 | 8.89E-01 | 1.41E-13 |
| 186.14882 | 185.08 | 16.86 | 13.90 | 14.43 | 14.79 | 1.44E-38 | 3.65E-14 | 3.65E-14 | 6.87E-14 | 3.70E-02 | 9.11E-05 | 2.67E-01 |
| 186.14888 | 22.91  | 16.35 | 13.01 | 13.17 | 14.32 | 3.83E-44 | 3.65E-14 | 3.65E-14 | 7.38E-14 | 8.77E-01 | 3.58E-08 | 1.15E-06 |
| 186.18526 | 133.41 | 17.63 | 16.18 | 16.40 | 16.72 | 5.88E-17 | 7.45E-14 | 2.06E-12 | 5.38E-07 | 5.65E-01 | 1.01E-02 | 2.28E-01 |
| 186.49258 | 101.67 | 16.99 | 9.39  | 10.24 | 10.64 | 1.85E-64 | 3.65E-14 | 3.65E-14 | 3.65E-14 | 6.90E-02 | 3.34E-03 | 6.84E-01 |
| 186.54379 | 221.11 | 14.55 | 15.46 | 16.55 | 16.16 | 1.83E-03 | 3.39E-01 | 1.40E-03 | 2.19E-02 | 2.03E-01 | 6.16E-01 | 9.01E-01 |
| 186.54911 | 66.53  | 17.99 | 18.98 | 19.56 | 18.83 | 3.71E-14 | 7.84E-07 | 7.79E-14 | 5.99E-05 | 1.12E-02 | 8.67E-01 | 1.01E-03 |
| 186.56054 | 82.75  | 15.66 | 16.10 | 15.94 | 15.80 | 2.70E-01 | 2.23E-01 | 5.99E-01 | 9.37E-01 | 9.08E-01 | 5.98E-01 | 9.31E-01 |
| 186.56603 | 224.05 | 15.78 | 16.74 | 16.31 | 16.51 | 8.31E-08 | 4.32E-08 | 5.25E-03 | 8.29E-05 | 4.39E-02 | 5.14E-01 | 6.38E-01 |
| 186.56702 | 79.61  | 12.91 | 15.42 | 14.72 | 16.06 | 1.60E-16 | 2.28E-11 | 1.41E-06 | 7.36E-14 | 1.85E-01 | 2.95E-01 | 1.32E-03 |
| 186.82817 | 57.65  | 19.97 | 18.67 | 18.79 | 18.46 | 3.22E-21 | 7.72E-14 | 3.59E-13 | 7.25E-14 | 8.78E-01 | 5.20E-01 | 1.53E-01 |
| 186.91698 | 45.89  | 14.60 | 13.63 | 15.53 | 14.58 | 3.48E-12 | 2.11E-04 | 2.86E-04 | 1.00E+00 | 2.72E-13 | 7.05E-04 | 5.41E-04 |

|           |        |       |       |       |       |          |          |          |          |          |          |          |
|-----------|--------|-------|-------|-------|-------|----------|----------|----------|----------|----------|----------|----------|
| 186.95613 | 302.49 | 17.57 | 12.67 | 10.51 | 15.40 | 4.05E-24 | 8.50E-13 | 4.59E-14 | 4.25E-03 | 4.12E-03 | 2.69E-04 | 7.87E-12 |
| 186.95804 | 51.12  | 18.61 | 18.30 | 18.87 | 18.01 | 8.60E-06 | 2.45E-01 | 3.78E-01 | 2.39E-03 | 4.79E-03 | 3.24E-01 | 6.57E-06 |
| 186.963   | 63.78  | 19.99 | 19.82 | 20.35 | 19.41 | 2.24E-08 | 6.15E-01 | 4.60E-02 | 3.71E-04 | 1.41E-03 | 2.84E-02 | 4.04E-09 |
| 186.96751 | 78.52  | 16.67 | 16.22 | 15.89 | 15.55 | 1.08E-04 | 2.61E-01 | 7.16E-03 | 6.44E-05 | 5.27E-01 | 4.46E-02 | 5.45E-01 |
| 186.99337 | 77.38  | 17.94 | 20.36 | 20.73 | 19.99 | 2.63E-26 | 7.23E-14 | 4.19E-14 | 1.31E-13 | 4.38E-01 | 4.58E-01 | 1.86E-02 |
| 187.00035 | 270.23 | 16.30 | 15.94 | 16.32 | 14.23 | 4.28E-11 | 6.12E-01 | 1.00E+00 | 7.30E-10 | 5.90E-01 | 1.05E-06 | 1.22E-09 |
| 187.01189 | 94.19  | 16.14 | 15.72 | 16.70 | 15.51 | 2.48E-05 | 3.02E-01 | 9.58E-02 | 5.91E-02 | 6.00E-04 | 8.56E-01 | 3.24E-05 |
| 187.01378 | 289    | 16.22 | 14.78 | 14.83 | 14.56 | 2.37E-09 | 1.12E-06 | 2.23E-06 | 4.02E-08 | 9.98E-01 | 8.70E-01 | 7.76E-01 |
| 187.01892 | 41.8   | 16.48 | 15.72 | 17.10 | 15.98 | 1.03E-06 | 1.42E-02 | 6.09E-02 | 2.08E-01 | 1.07E-06 | 7.66E-01 | 1.63E-04 |
| 187.03048 | 67.33  | 17.47 | 17.31 | 17.38 | 17.24 | 6.20E-01 | 8.01E-01 | 9.48E-01 | 5.74E-01 | 9.84E-01 | 9.80E-01 | 8.80E-01 |
| 187.03729 | 236.87 | 15.51 | 15.71 | 17.18 | 15.34 | 1.54E-07 | 9.28E-01 | 3.28E-06 | 9.55E-01 | 1.03E-04 | 7.02E-01 | 1.18E-06 |
| 187.05607 | 64.85  | 15.60 | 17.73 | 17.10 | 17.63 | 2.21E-16 | 9.48E-14 | 3.87E-08 | 1.03E-12 | 7.26E-02 | 9.81E-01 | 1.94E-01 |
| 187.07136 | 64.08  | 17.33 | 15.93 | 16.67 | 16.64 | 2.21E-09 | 1.84E-10 | 5.73E-03 | 5.01E-03 | 2.06E-03 | 5.22E-03 | 9.99E-01 |
| 187.07946 | 153.59 | 18.64 | 15.67 | 15.89 | 16.31 | 7.08E-41 | 3.65E-14 | 3.65E-14 | 4.16E-14 | 6.93E-01 | 1.03E-02 | 1.57E-01 |
| 187.08779 | 26.58  | 16.03 | 17.98 | 17.48 | 19.75 | 1.23E-22 | 1.05E-08 | 2.48E-05 | 4.30E-14 | 3.98E-01 | 1.19E-06 | 2.49E-10 |
| 187.09717 | 180.16 | 16.43 | 15.13 | 14.84 | 15.27 | 7.19E-20 | 2.46E-13 | 7.61E-14 | 1.56E-10 | 3.20E-01 | 8.15E-01 | 5.43E-02 |
| 187.103   | 58.88  | 15.85 | 14.44 | 15.65 | 15.00 | 1.57E-08 | 4.13E-08 | 8.23E-01 | 2.99E-03 | 5.51E-06 | 1.04E-01 | 4.62E-02 |
| 187.10901 | 280.85 | 13.28 | 13.41 | 15.30 | 12.65 | 2.90E-04 | 9.96E-01 | 4.67E-03 | 7.45E-01 | 1.32E-02 | 6.38E-01 | 2.47E-04 |
| 187.10912 | 180.14 | 13.85 | 13.77 | 15.45 | 14.01 | 5.00E-05 | 9.98E-01 | 2.48E-04 | 9.76E-01 | 2.04E-04 | 9.38E-01 | 2.75E-03 |
| 187.11735 | 177.68 | 17.05 | 14.87 | 14.81 | 15.24 | 2.32E-38 | 3.65E-14 | 3.65E-14 | 5.12E-14 | 9.83E-01 | 1.19E-01 | 4.76E-02 |
| 187.12622 | 286.95 | 19.15 | 18.29 | 18.21 | 18.10 | 8.15E-05 | 3.24E-03 | 9.03E-04 | 2.90E-04 | 9.90E-01 | 8.91E-01 | 9.75E-01 |
| 187.14405 | 186.14 | 16.41 | 14.82 | 14.96 | 15.19 | 3.35E-16 | 1.03E-13 | 1.83E-12 | 9.22E-09 | 8.90E-01 | 2.52E-01 | 6.49E-01 |
| 187.14797 | 23.78  | 18.06 | 15.14 | 15.85 | 16.86 | 1.56E-36 | 3.65E-14 | 4.43E-14 | 3.50E-08 | 1.98E-03 | 9.54E-14 | 6.33E-06 |
| 187.14812 | 178.61 | 17.54 | 14.83 | 15.46 | 15.37 | 1.13E-35 | 3.65E-14 | 5.01E-14 | 4.79E-14 | 6.31E-03 | 3.50E-02 | 9.66E-01 |
| 187.54716 | 121.2  | 17.14 | 13.82 | 14.50 | 14.00 | 3.68E-39 | 3.65E-14 | 3.94E-14 | 3.65E-14 | 1.81E-02 | 8.84E-01 | 1.43E-01 |
| 187.56134 | 83.45  | 14.29 | 16.10 | 16.18 | 15.65 | 5.91E-17 | 2.11E-13 | 8.09E-14 | 4.63E-08 | 9.84E-01 | 2.30E-01 | 1.09E-01 |
| 187.58951 | 26.45  | 14.37 | 14.23 | 14.96 | 17.28 | 2.10E-09 | 9.91E-01 | 5.82E-01 | 3.11E-08 | 4.26E-01 | 1.86E-08 | 2.21E-05 |
| 187.60361 | 24.67  | 13.94 | 16.05 | 12.90 | 16.69 | 4.13E-21 | 2.84E-07 | 2.64E-02 | 5.78E-11 | 1.62E-13 | 3.63E-01 | 7.35E-14 |
| 187.95667 | 61.17  | 22.12 | 22.25 | 22.70 | 21.75 | 1.40E-06 | 8.63E-01 | 1.76E-03 | 1.15E-01 | 3.00E-02 | 2.05E-02 | 2.96E-07 |
| 187.96386 | 52.68  | 17.91 | 17.48 | 18.03 | 17.38 | 7.77E-06 | 1.21E-02 | 8.37E-01 | 1.62E-03 | 9.81E-04 | 9.13E-01 | 1.02E-04 |
| 187.97093 | 96.88  | 17.39 | 13.84 | 15.48 | 14.96 | 2.93E-27 | 3.65E-14 | 1.83E-10 | 8.16E-14 | 1.18E-07 | 9.40E-04 | 2.67E-01 |
| 188.00056 | 45.14  | 20.24 | 12.35 | 12.97 | 15.14 | 1.54E-43 | 3.65E-14 | 3.65E-14 | 7.21E-14 | 5.94E-01 | 7.11E-07 | 1.51E-04 |
| 188.01382 | 54.79  | 14.71 | 14.64 | 15.21 | 15.58 | 1.78E-02 | 9.97E-01 | 3.91E-01 | 4.16E-02 | 3.07E-01 | 3.01E-02 | 6.86E-01 |
| 188.03643 | 60.67  | 17.96 | 16.85 | 18.51 | 18.64 | 2.39E-20 | 8.05E-09 | 7.79E-03 | 9.11E-04 | 7.36E-14 | 7.33E-14 | 8.93E-01 |
| 188.05536 | 161.97 | 16.89 | 15.78 | 14.97 | 16.82 | 1.60E-16 | 1.25E-05 | 9.36E-14 | 9.91E-01 | 3.52E-03 | 1.41E-04 | 2.29E-12 |
| 188.07063 | 46.41  | 25.30 | 24.39 | 24.72 | 24.70 | 3.71E-20 | 6.87E-14 | 5.05E-10 | 5.62E-10 | 1.20E-03 | 3.94E-03 | 9.97E-01 |
| 188.09557 | 25.87  | 14.98 | 16.40 | 16.00 | 18.36 | 2.39E-23 | 4.38E-06 | 1.60E-03 | 4.10E-14 | 4.95E-01 | 1.30E-09 | 3.18E-13 |
| 188.10174 | 61.27  | 18.01 | 18.01 | 18.47 | 18.16 | 2.70E-02 | 1.00E+00 | 3.32E-02 | 8.12E-01 | 4.38E-02 | 8.32E-01 | 3.15E-01 |
| 188.11075 | 195    | 15.82 | 10.85 | 10.70 | 11.58 | 2.46E-19 | 7.78E-14 | 7.41E-14 | 2.80E-11 | 9.93E-01 | 6.20E-01 | 4.51E-01 |
| 188.1155  | 61.19  | 17.07 | 18.04 | 18.14 | 17.64 | 1.38E-11 | 7.21E-09 | 1.14E-10 | 2.04E-03 | 9.17E-01 | 6.48E-02 | 1.04E-02 |
| 188.12797 | 274.15 | 18.35 | 16.36 | 16.19 | 16.53 | 2.31E-29 | 5.70E-14 | 3.83E-14 | 7.44E-14 | 7.95E-01 | 7.99E-01 | 2.69E-01 |
| 188.12804 | 155.89 | 18.51 | 16.77 | 16.61 | 17.45 | 3.01E-27 | 6.45E-14 | 4.03E-14 | 5.90E-09 | 7.43E-01 | 6.00E-04 | 7.85E-06 |
| 188.17575 | 36.32  | 18.49 | 21.47 | 21.30 | 20.58 | 3.10E-51 | 3.65E-14 | 3.65E-14 | 3.70E-14 | 7.18E-01 | 2.23E-06 | 1.79E-04 |
| 188.481   | 106.99 | 18.14 | 10.30 | 14.02 | 10.66 | 6.18E-39 | 3.65E-14 | 7.12E-13 | 3.65E-14 | 2.91E-10 | 9.19E-01 | 2.74E-08 |
| 188.51464 | 86.04  | 18.04 | 14.81 | 14.88 | 14.42 | 4.25E-17 | 2.84E-12 | 5.47E-12 | 1.08E-13 | 9.98E-01 | 8.20E-01 | 7.20E-01 |
| 188.51521 | 291.64 | 13.62 | 14.75 | 14.87 | 11.76 | 3.54E-13 | 2.22E-02 | 7.88E-03 | 3.72E-05 | 9.90E-01 | 5.28E-11 | 6.28E-12 |
| 188.56855 | 89.04  | 17.45 | 17.80 | 18.13 | 17.51 | 1.30E-06 | 3.81E-02 | 2.37E-06 | 9.72E-01 | 7.49E-02 | 1.50E-01 | 6.27E-05 |
| 188.61148 | 24.6   | 14.82 | 17.76 | 16.14 | 19.03 | 7.27E-30 | 7.36E-14 | 1.89E-04 | 3.65E-14 | 5.27E-06 | 8.73E-04 | 7.65E-14 |
| 188.61724 | 61.21  | 15.63 | 14.99 | 15.64 | 14.71 | 2.16E-03 | 1.05E-01 | 1.00E+00 | 8.76E-03 | 1.10E-01 | 7.85E-01 | 9.89E-03 |
| 188.82524 | 47.89  | 19.46 | 18.01 | 18.08 | 17.80 | 6.04E-24 | 7.41E-14 | 7.39E-14 | 6.78E-14 | 9.63E-01 | 5.62E-01 | 2.85E-01 |
| 188.91834 | 270.19 | 16.84 | 8.36  | 8.34  | 10.02 | 7.03E-28 | 5.03E-14 | 4.63E-14 | 7.39E-14 | 1.00E+00 | 1.58E-01 | 1.42E-01 |
| 188.9612  | 51.21  | 16.22 | 15.35 | 15.64 | 14.82 | 5.78E-04 | 3.86E-02 | 2.66E-01 | 2.21E-04 | 8.25E-01 | 4.16E-01 | 8.17E-02 |
| 189.00023 | 78.58  | 16.93 | 15.20 | 16.03 | 15.59 | 1.94E-03 | 1.24E-03 | 1.96E-01 | 2.49E-02 | 3.01E-01 | 8.57E-01 | 8.02E-01 |
| 189.00611 | 41.51  | 15.77 | 18.55 | 17.65 | 17.93 | 4.37E-16 | 7.45E-14 | 2.40E-08 | 6.22E-10 | 2.69E-02 | 2.40E-01 | 8.29E-01 |
| 189.01133 | 288.67 | 12.62 | 16.30 | 16.36 | 15.26 | 3.91E-25 | 6.89E-14 | 6.16E-14 | 1.35E-11 | 9.98E-01 | 2.68E-02 | 1.52E-02 |
| 189.01795 | 72.15  | 19.48 | 22.70 | 22.61 | 22.23 | 1.04E-38 | 3.65E-14 | 3.65E-14 | 3.94E-14 | 9.82E-01 | 2.08E-01 | 3.79E-01 |
| 189.03119 | 31.73  | 15.85 | 14.44 | 13.96 | 14.72 | 8.00E-04 | 1.66E-02 | 4.25E-04 | 9.65E-02 | 7.53E-01 | 9.41E-01 | 4.13E-01 |
| 189.04098 | 42.69  | 15.66 | 16.19 | 16.29 | 15.11 | 2.24E-03 | 3.50E-01 | 2.02E-01 | 3.43E-01 | 9.92E-01 | 9.08E-03 | 3.26E-03 |
| 189.04702 | 44.24  | 16.74 | 15.19 | 16.04 | 16.05 | 2.10E-07 | 2.36E-08 | 2.69E-02 | 3.82E-02 | 6.97E-03 | 8.96E-03 | 1.00E+00 |
| 189.0523  | 33.37  | 15.64 | 16.62 | 16.69 | 16.55 | 6.41E-02 | 1.31E-01 | 8.42E-02 | 1.95E-01 | 9.98E-01 | 9.99E-01 | 9.91E-01 |
| 189.05826 | 67.56  | 15.91 | 15.88 | 15.95 | 16.32 | 7.17E-01 | 1.00E+00 | 1.00E+00 | 7.48E-01 | 9.99E-01 | 7.35E-01 | 8.15E-01 |
| 189.07161 | 65.66  | 22.42 | 22.22 | 22.47 | 22.15 | 4.68E-04 | 9.72E-02 | 9.00E-01 | 1.08E-02 | 1.94E-02 | 8.35E-01 | 1.50E-03 |
| 189.08621 | 294.79 | 17.06 | 16.34 | 16.29 | 15.56 | 1.08E-07 | 1.23E-02 | 5.98E-03 | 1.29E-08 | 9.98E-01 | 1.03E-02 | 1.67E-02 |
| 189.08632 | 196.18 | 18.24 | 15.80 | 16.13 | 15.94 | 1.83E-35 | 3.65E-14 | 4.05E-14 | 3.72E-14 | 2.70E-01 | 8.69E-01 | 7.53E-01 |
| 189.09119 | 176.72 | 16.74 | 14.37 | 14.50 | 15.02 | 1.51E-29 | 3.76E-14 | 4.32E-14 | 8.20E-14 | 9.17E-01 | 8.98E-03 | 5.12E-02 |
| 189.09492 | 290.98 | 19.44 | 20.27 | 20.09 | 20.58 | 2.85E-02 | 1.27E-01 | 3.10E-01 | 2.02E-02 | 9.65E-01 | 8.76E-01 | 6.16E-01 |
| 189.10343 | 24.39  | 13.44 | 16.64 | 14.69 | 17.95 | 1.17E-20 | 1.56E-11 | 1.98E-02 | 7.32E-14 | 9.46E-05 | 2.35E-02 | 5.90E-11 |
| 189.11326 | 22.03  | 17.80 | 14.80 | 14.33 | 16.49 | 4.40E-55 | 3.65E-14 | 3.65E-14 | 3.52E-11 | 4.25E-02 | 7.43E-14 | 4.16E-14 |

|           |        |       |       |       |       |          |          |          |          |          |          |          |
|-----------|--------|-------|-------|-------|-------|----------|----------|----------|----------|----------|----------|----------|
| 189.11351 | 284.5  | 18.67 | 16.38 | 16.57 | 16.58 | 7.90E-31 | 3.74E-14 | 5.01E-14 | 6.14E-14 | 7.47E-01 | 7.40E-01 | 1.00E+00 |
| 189.12334 | 47.09  | 20.31 | 20.39 | 20.53 | 20.16 | 2.64E-02 | 8.91E-01 | 2.13E-01 | 6.18E-01 | 6.39E-01 | 2.51E-01 | 1.48E-02 |
| 189.12743 | 167.18 | 17.29 | 15.27 | 15.21 | 15.42 | 7.31E-24 | 7.45E-14 | 7.33E-14 | 7.56E-14 | 9.93E-01 | 8.91E-01 | 7.60E-01 |
| 189.12918 | 22.38  | 15.77 | 16.70 | 18.95 | 17.94 | 1.74E-26 | 2.79E-03 | 3.76E-14 | 3.51E-13 | 1.15E-13 | 7.02E-05 | 1.86E-03 |
| 189.13465 | 66.94  | 18.04 | 18.69 | 18.50 | 18.36 | 3.19E-06 | 1.27E-06 | 1.02E-03 | 6.00E-02 | 4.14E-01 | 4.62E-02 | 6.67E-01 |
| 189.15978 | 69.24  | 22.34 | 24.23 | 23.86 | 23.73 | 5.23E-27 | 3.85E-14 | 7.43E-14 | 8.09E-14 | 1.05E-01 | 1.44E-02 | 8.41E-01 |
| 189.16362 | 24.01  | 18.95 | 16.33 | 17.08 | 17.79 | 4.89E-36 | 3.65E-14 | 5.70E-14 | 1.40E-09 | 1.67E-04 | 3.46E-13 | 5.64E-04 |
| 189.16376 | 155.25 | 18.10 | 15.98 | 16.43 | 16.77 | 2.39E-23 | 5.27E-14 | 7.38E-14 | 4.14E-10 | 1.05E-01 | 5.93E-04 | 2.95E-01 |
| 189.17908 | 56.02  | 15.60 | 17.48 | 17.06 | 16.71 | 5.19E-20 | 7.31E-14 | 3.90E-13 | 7.27E-08 | 1.15E-01 | 5.87E-04 | 2.75E-01 |
| 189.48234 | 267.96 | 17.19 | 11.25 | 11.74 | 13.12 | 3.31E-18 | 7.54E-14 | 1.02E-13 | 3.01E-08 | 8.81E-01 | 3.62E-02 | 1.87E-01 |
| 189.52727 | 95.4   | 16.61 | 14.02 | 16.23 | 15.26 | 2.67E-12 | 6.30E-12 | 6.71E-01 | 9.34E-04 | 9.98E-09 | 4.04E-03 | 3.91E-02 |
| 189.52862 | 32.58  | 13.19 | 16.70 | 10.26 | 10.78 | 1.08E-72 | 3.65E-14 | 3.74E-14 | 7.38E-14 | 3.65E-14 | 3.65E-14 | 1.62E-01 |
| 189.53183 | 88.87  | 18.36 | 22.02 | 22.87 | 21.35 | 7.86E-32 | 5.72E-14 | 3.65E-14 | 7.83E-14 | 6.11E-02 | 2.28E-01 | 1.11E-04 |
| 189.55869 | 97.26  | 17.41 | 10.07 | 11.82 | 12.06 | 9.88E-37 | 3.65E-14 | 4.32E-14 | 6.58E-14 | 2.70E-03 | 7.87E-04 | 9.68E-01 |
| 189.57064 | 88.63  | 17.37 | 17.58 | 17.89 | 17.25 | 4.04E-05 | 4.16E-01 | 6.16E-04 | 8.26E-01 | 9.81E-02 | 1.05E-01 | 4.96E-05 |
| 189.6194  | 20.47  | 15.41 | 15.76 | 14.30 | 16.73 | 5.88E-15 | 5.22E-01 | 1.15E-04 | 6.59E-06 | 4.76E-07 | 2.49E-03 | 7.43E-14 |
| 189.63199 | 23.47  | 14.56 | 13.63 | 16.15 | 15.53 | 1.12E-10 | 4.22E-02 | 4.49E-05 | 3.72E-02 | 1.57E-10 | 3.89E-06 | 3.34E-01 |
| 189.95361 | 51.42  | 16.94 | 16.23 | 16.58 | 15.92 | 2.62E-07 | 3.48E-04 | 1.51E-01 | 1.94E-07 | 2.12E-01 | 3.31E-01 | 2.17E-03 |
| 189.98968 | 110.01 | 16.72 | 14.76 | 13.68 | 13.44 | 6.51E-23 | 7.45E-09 | 7.36E-14 | 7.03E-14 | 4.51E-03 | 4.65E-04 | 8.80E-01 |
| 190.00225 | 81.19  | 17.99 | 16.22 | 17.12 | 16.76 | 4.61E-20 | 6.87E-14 | 2.16E-06 | 7.37E-11 | 2.09E-06 | 1.34E-02 | 1.76E-01 |
| 190.01258 | 43.07  | 18.22 | 16.86 | 17.68 | 17.53 | 5.14E-08 | 6.37E-09 | 5.57E-02 | 1.03E-02 | 1.24E-03 | 1.70E-02 | 9.10E-01 |
| 190.01922 | 82.97  | 17.58 | 19.53 | 19.42 | 19.20 | 7.80E-25 | 6.65E-14 | 7.34E-14 | 7.98E-14 | 9.46E-01 | 3.38E-01 | 6.56E-01 |
| 190.02562 | 51.85  | 17.29 | 16.63 | 16.42 | 16.73 | 2.91E-05 | 1.94E-03 | 1.73E-05 | 1.56E-02 | 6.95E-01 | 9.54E-01 | 3.85E-01 |
| 190.03176 | 87.47  | 16.83 | 18.70 | 19.62 | 18.43 | 4.96E-22 | 9.94E-12 | 5.10E-14 | 1.17E-08 | 2.14E-03 | 7.48E-01 | 5.63E-05 |
| 190.03963 | 85.88  | 14.99 | 17.14 | 15.07 | 16.42 | 8.02E-16 | 4.91E-13 | 9.92E-01 | 2.72E-06 | 7.50E-12 | 6.00E-02 | 1.64E-05 |
| 190.0709  | 285.61 | 19.53 | 17.78 | 17.59 | 17.87 | 1.18E-11 | 1.81E-08 | 2.92E-10 | 2.03E-07 | 9.13E-01 | 9.91E-01 | 7.87E-01 |
| 190.07743 | 39.04  | 17.47 | 15.44 | 16.01 | 16.17 | 9.07E-41 | 3.65E-14 | 3.76E-14 | 6.81E-14 | 4.10E-05 | 2.54E-07 | 6.06E-01 |
| 190.08214 | 73.81  | 15.49 | 14.54 | 14.26 | 15.74 | 8.02E-05 | 3.85E-02 | 2.99E-03 | 9.01E-01 | 8.66E-01 | 8.31E-03 | 5.20E-04 |
| 190.08636 | 195.21 | 16.99 | 14.43 | 14.82 | 14.95 | 2.48E-36 | 3.65E-14 | 3.72E-14 | 5.27E-14 | 1.31E-01 | 2.77E-02 | 8.97E-01 |
| 190.08943 | 281.03 | 19.00 | 17.03 | 16.76 | 16.20 | 2.47E-18 | 5.21E-10 | 1.39E-12 | 7.52E-14 | 8.03E-01 | 3.97E-02 | 2.67E-01 |
| 190.09835 | 291.47 | 18.71 | 16.86 | 16.50 | 17.01 | 5.61E-15 | 3.16E-10 | 1.29E-13 | 1.67E-08 | 5.55E-01 | 9.56E-01 | 2.76E-01 |
| 190.10723 | 289.62 | 18.71 | 19.27 | 19.18 | 19.15 | 3.86E-01 | 3.88E-01 | 5.26E-01 | 6.13E-01 | 9.95E-01 | 9.89E-01 | 1.00E+00 |
| 190.11867 | 66.27  | 18.11 | 18.61 | 18.25 | 18.00 | 1.31E-04 | 1.21E-03 | 7.13E-01 | 8.55E-01 | 4.25E-02 | 1.32E-04 | 2.84E-01 |
| 190.12828 | 35.02  | 14.69 | 15.48 | 15.94 | 16.45 | 7.26E-07 | 4.99E-02 | 3.00E-04 | 4.16E-07 | 4.60E-01 | 1.76E-02 | 4.04E-01 |
| 190.13807 | 35.84  | 14.29 | 16.74 | 17.04 | 16.37 | 3.11E-21 | 7.54E-14 | 7.42E-14 | 1.89E-11 | 7.13E-01 | 5.73E-01 | 9.38E-02 |
| 190.14373 | 46.67  | 17.55 | 15.46 | 16.03 | 16.12 | 1.21E-18 | 7.47E-14 | 3.66E-11 | 1.81E-09 | 4.58E-02 | 1.87E-02 | 9.77E-01 |
| 190.15678 | 64.03  | 15.63 | 15.81 | 15.76 | 15.62 | 8.02E-01 | 8.46E-01 | 9.38E-01 | 1.00E+00 | 9.95E-01 | 8.53E-01 | 9.39E-01 |
| 190.16313 | 68.62  | 18.74 | 20.66 | 20.39 | 20.07 | 2.23E-20 | 7.58E-14 | 8.04E-14 | 8.43E-10 | 5.27E-01 | 2.06E-02 | 3.75E-01 |
| 190.16699 | 22.98  | 16.00 | 10.32 | 11.67 | 13.21 | 4.45E-17 | 7.52E-14 | 5.92E-11 | 7.70E-05 | 1.35E-01 | 6.39E-05 | 7.53E-02 |
| 190.4552  | 90.17  | 15.67 | 15.44 | 15.41 | 15.05 | 3.74E-01 | 9.09E-01 | 8.68E-01 | 2.83E-01 | 1.00E+00 | 6.89E-01 | 7.38E-01 |
| 190.49887 | 93.98  | 14.76 | 15.34 | 16.69 | 15.36 | 1.06E-05 | 4.13E-01 | 3.18E-06 | 4.04E-01 | 3.26E-03 | 1.00E+00 | 5.24E-03 |
| 190.50839 | 99.46  | 19.63 | 10.72 | 14.02 | 11.98 | 2.69E-36 | 3.65E-14 | 7.49E-14 | 3.72E-14 | 1.24E-06 | 1.99E-01 | 7.65E-03 |
| 190.51193 | 136.33 | 15.81 | 15.81 | 16.14 | 15.94 | 7.64E-01 | 1.00E+00 | 7.75E-01 | 9.83E-01 | 7.91E-01 | 9.84E-01 | 9.48E-01 |
| 190.53064 | 86.07  | 16.61 | 18.84 | 19.84 | 18.67 | 2.57E-30 | 7.53E-14 | 3.65E-14 | 9.87E-14 | 3.07E-04 | 8.97E-01 | 2.38E-05 |
| 190.53401 | 86.19  | 15.13 | 16.38 | 17.10 | 16.23 | 2.72E-14 | 6.23E-07 | 7.63E-14 | 2.51E-05 | 1.15E-02 | 9.25E-01 | 1.80E-03 |
| 190.59834 | 25.04  | 14.92 | 15.28 | 13.89 | 16.84 | 2.37E-12 | 7.30E-01 | 1.62E-02 | 1.10E-06 | 7.26E-04 | 1.88E-04 | 3.19E-13 |
| 190.62711 | 24.12  | 12.09 | 14.56 | 11.11 | 15.43 | 7.54E-21 | 1.71E-07 | 1.02E-01 | 5.82E-12 | 1.19E-12 | 2.27E-01 | 7.39E-14 |
| 190.82315 | 45.33  | 17.31 | 14.45 | 14.69 | 14.86 | 1.88E-42 | 3.65E-14 | 3.65E-14 | 3.65E-14 | 5.68E-01 | 1.39E-01 | 7.97E-01 |
| 190.91188 | 47.01  | 19.51 | 19.74 | 20.02 | 19.89 | 1.31E-04 | 1.79E-01 | 6.52E-05 | 8.63E-03 | 8.72E-02 | 6.43E-01 | 6.78E-01 |
| 190.96301 | 263.07 | 17.36 | 15.66 | 15.25 | 16.00 | 5.57E-17 | 1.85E-11 | 7.45E-14 | 1.94E-07 | 3.27E-01 | 4.88E-01 | 1.21E-02 |
| 190.97927 | 291.2  | 17.61 | 15.29 | 15.70 | 15.25 | 4.27E-13 | 9.45E-11 | 7.94E-08 | 1.36E-10 | 6.06E-01 | 9.99E-01 | 5.50E-01 |
| 190.99662 | 39.75  | 17.23 | 16.90 | 16.87 | 17.71 | 1.82E-07 | 1.07E-01 | 6.24E-02 | 9.50E-03 | 9.97E-01 | 2.48E-06 | 7.84E-07 |
| 191.00393 | 156.02 | 13.63 | 14.00 | 13.63 | 13.13 | 4.66E-01 | 8.81E-01 | 1.00E+00 | 7.79E-01 | 8.88E-01 | 3.71E-01 | 7.91E-01 |
| 191.01029 | 278.95 | 16.20 | 19.45 | 19.96 | 18.56 | 3.45E-43 | 3.65E-14 | 3.65E-14 | 7.36E-14 | 1.22E-01 | 1.50E-03 | 8.07E-08 |
| 191.01531 | 86.02  | 17.27 | 19.38 | 19.15 | 19.07 | 3.45E-24 | 6.69E-14 | 7.51E-14 | 7.58E-14 | 6.73E-01 | 4.61E-01 | 9.82E-01 |
| 191.02217 | 249.47 | 17.67 | 16.67 | 17.11 | 17.48 | 7.39E-06 | 5.32E-06 | 2.57E-02 | 7.83E-01 | 1.28E-01 | 8.42E-04 | 2.98E-01 |
| 191.03235 | 81.95  | 16.02 | 17.16 | 16.21 | 15.68 | 4.43E-04 | 4.91E-03 | 9.42E-01 | 7.72E-01 | 3.34E-02 | 3.20E-04 | 4.55E-01 |
| 191.03985 | 76.59  | 21.03 | 19.74 | 19.58 | 19.84 | 7.63E-15 | 9.57E-11 | 3.62E-13 | 6.41E-09 | 8.29E-01 | 9.50E-01 | 5.17E-01 |
| 191.04849 | 196.37 | 15.93 | 16.98 | 17.61 | 18.53 | 3.75E-08 | 4.90E-02 | 2.51E-04 | 1.25E-08 | 4.38E-01 | 2.16E-03 | 1.34E-01 |
| 191.04924 | 63.1   | 15.23 | 16.06 | 15.62 | 16.31 | 7.41E-04 | 1.26E-02 | 4.67E-01 | 7.89E-04 | 3.84E-01 | 8.26E-01 | 7.61E-02 |
| 191.06626 | 153.2  | 15.50 | 15.49 | 14.20 | 15.00 | 3.05E-03 | 1.00E+00 | 4.50E-03 | 5.86E-01 | 7.16E-03 | 6.28E-01 | 2.04E-01 |
| 191.07039 | 192.18 | 16.49 | 14.88 | 15.18 | 15.40 | 4.19E-22 | 6.63E-14 | 7.59E-14 | 1.42E-10 | 2.29E-01 | 6.58E-03 | 4.70E-01 |
| 191.08156 | 161.81 | 17.44 | 14.37 | 14.22 | 15.34 | 1.31E-50 | 3.65E-14 | 3.65E-14 | 4.43E-14 | 8.53E-01 | 3.11E-06 | 4.84E-08 |
| 191.09288 | 176.66 | 17.11 | 14.70 | 14.63 | 15.32 | 4.39E-48 | 3.65E-14 | 3.65E-14 | 3.83E-14 | 9.65E-01 | 3.90E-04 | 5.00E-05 |
| 191.09304 | 31.41  | 17.47 | 17.72 | 17.77 | 16.67 | 3.25E-06 | 6.28E-01 | 4.86E-01 | 1.49E-03 | 9.97E-01 | 2.39E-05 | 7.98E-06 |
| 191.09761 | 32.95  | 17.10 | 16.83 | 17.03 | 17.00 | 9.51E-01 | 9.38E-01 | 9.99E-01 | 9.96E-01 | 9.75E-01 | 9.88E-01 | 1.00E+00 |
| 191.10168 | 270.89 | 22.21 | 20.65 | 20.44 | 20.70 | 2.94E-07 | 3.23E-05 | 1.30E-06 | 1.07E-04 | 9.24E-01 | 9.99E-01 | 8.69E-01 |
| 191.102   | 140.83 | 20.65 | 19.08 | 18.95 | 19.59 | 1.62E-09 | 1.55E-07 | 9.69E-09 | 1.03E-03 | 9.69E-01 | 2.95E-01 | 1.22E-01 |

|           |        |       |       |       |       |          |          |          |          |          |          |          |
|-----------|--------|-------|-------|-------|-------|----------|----------|----------|----------|----------|----------|----------|
| 191.10659 | 286.06 | 17.41 | 16.19 | 16.34 | 16.16 | 3.48E-10 | 3.48E-08 | 1.05E-06 | 3.61E-08 | 8.98E-01 | 9.99E-01 | 8.42E-01 |
| 191.11194 | 273.25 | 17.09 | 15.38 | 15.37 | 15.78 | 6.01E-17 | 1.35E-13 | 9.95E-14 | 1.40E-08 | 1.00E+00 | 2.72E-01 | 2.37E-01 |
| 191.12918 | 204.58 | 16.34 | 13.53 | 14.59 | 14.31 | 1.60E-08 | 6.90E-09 | 5.00E-04 | 7.07E-05 | 9.21E-02 | 3.45E-01 | 9.30E-01 |
| 191.1387  | 64.83  | 18.10 | 19.16 | 19.04 | 18.63 | 1.27E-12 | 1.67E-11 | 1.17E-09 | 2.08E-03 | 8.68E-01 | 3.30E-03 | 3.13E-02 |
| 191.14291 | 22.93  | 17.22 | 14.19 | 14.78 | 15.18 | 2.64E-52 | 3.65E-14 | 3.65E-14 | 3.65E-14 | 1.10E-03 | 2.19E-08 | 6.27E-02 |
| 191.14294 | 287.88 | 17.54 | 16.28 | 16.34 | 16.23 | 6.13E-14 | 1.27E-10 | 5.29E-10 | 6.32E-11 | 9.90E-01 | 9.91E-01 | 9.36E-01 |
| 191.16652 | 63.52  | 14.72 | 14.24 | 13.65 | 14.22 | 1.54E-04 | 1.64E-01 | 3.21E-05 | 1.58E-01 | 6.60E-02 | 1.00E+00 | 9.01E-02 |
| 191.17931 | 23.79  | 17.00 | 14.57 | 14.63 | 15.69 | 2.59E-44 | 3.65E-14 | 3.65E-14 | 9.38E-14 | 9.87E-01 | 1.94E-10 | 9.31E-10 |
| 191.17946 | 170.57 | 17.39 | 14.91 | 14.88 | 15.62 | 9.66E-32 | 3.72E-14 | 3.67E-14 | 8.29E-14 | 9.99E-01 | 4.84E-03 | 2.77E-03 |
| 191.47656 | 107.13 | 16.48 | 15.01 | 14.49 | 15.01 | 1.35E-17 | 2.87E-10 | 7.32E-14 | 6.45E-10 | 7.86E-02 | 1.00E+00 | 9.84E-02 |
| 191.48998 | 103.08 | 14.77 | 14.89 | 15.51 | 14.45 | 1.05E-02 | 9.81E-01 | 6.99E-02 | 7.44E-01 | 1.90E-01 | 5.40E-01 | 6.10E-03 |
| 191.49875 | 90.7   | 15.89 | 15.73 | 16.16 | 15.62 | 3.75E-01 | 9.53E-01 | 8.14E-01 | 8.32E-01 | 5.22E-01 | 9.88E-01 | 3.47E-01 |
| 191.51526 | 87.01  | 15.50 | 16.65 | 17.09 | 16.69 | 2.36E-09 | 2.53E-05 | 1.97E-09 | 2.15E-05 | 2.94E-01 | 9.99E-01 | 4.00E-01 |
| 191.53646 | 102.36 | 16.88 | 14.92 | 15.04 | 15.53 | 2.34E-17 | 7.84E-14 | 1.39E-13 | 8.71E-08 | 9.48E-01 | 5.04E-02 | 1.64E-01 |
| 191.54054 | 80.06  | 16.71 | 16.36 | 15.96 | 15.61 | 5.27E-02 | 8.14E-01 | 2.38E-01 | 4.20E-02 | 7.72E-01 | 3.05E-01 | 8.45E-01 |
| 191.55015 | 204.05 | 16.95 | 18.49 | 18.31 | 18.88 | 4.74E-14 | 1.90E-09 | 9.14E-08 | 3.77E-13 | 8.76E-01 | 3.92E-01 | 9.52E-02 |
| 191.60614 | 24.81  | 16.18 | 18.47 | 17.47 | 19.78 | 2.15E-28 | 8.69E-14 | 1.48E-05 | 3.65E-14 | 1.67E-03 | 4.04E-05 | 1.73E-13 |
| 191.93459 | 278.69 | 17.89 | 15.13 | 14.61 | 16.57 | 1.13E-24 | 7.48E-14 | 5.12E-14 | 9.60E-05 | 3.13E-01 | 3.96E-05 | 7.82E-09 |
| 191.98233 | 50.54  | 17.30 | 14.97 | 15.38 | 14.91 | 2.72E-09 | 1.17E-07 | 1.43E-05 | 1.19E-07 | 7.45E-01 | 9.99E-01 | 6.73E-01 |
| 191.99146 | 121    | 17.23 | 11.32 | 11.98 | 12.48 | 4.47E-78 | 3.65E-14 | 3.65E-14 | 3.65E-14 | 1.69E-02 | 5.71E-06 | 1.32E-01 |
| 191.99443 | 130.23 | 16.91 | 15.98 | 16.81 | 15.64 | 9.99E-12 | 7.67E-06 | 9.38E-01 | 1.22E-09 | 1.50E-04 | 2.94E-01 | 5.56E-08 |
| 192.0091  | 42.99  | 15.51 | 13.82 | 16.85 | 15.99 | 2.05E-08 | 1.77E-03 | 1.89E-02 | 7.40E-01 | 4.96E-09 | 8.22E-05 | 2.86E-01 |
| 192.01459 | 56.05  | 19.46 | 19.43 | 19.74 | 19.48 | 6.09E-02 | 9.97E-01 | 1.06E-01 | 9.99E-01 | 7.80E-02 | 9.88E-01 | 1.83E-01 |
| 192.02434 | 64.82  | 20.36 | 19.78 | 20.68 | 19.77 | 5.96E-06 | 1.75E-02 | 3.78E-01 | 1.77E-02 | 8.09E-05 | 1.00E+00 | 9.51E-05 |
| 192.03056 | 253.1  | 12.15 | 13.65 | 14.24 | 13.26 | 5.78E-05 | 4.99E-03 | 2.36E-05 | 7.81E-02 | 5.69E-01 | 8.35E-01 | 1.54E-01 |
| 192.03254 | 160.33 | 15.69 | 14.60 | 15.47 | 15.36 | 2.49E-04 | 1.32E-04 | 8.15E-01 | 5.67E-01 | 4.78E-03 | 2.57E-02 | 9.72E-01 |
| 192.04115 | 50.76  | 19.19 | 19.28 | 19.26 | 18.84 | 4.05E-02 | 9.40E-01 | 9.70E-01 | 1.49E-01 | 9.99E-01 | 4.89E-02 | 6.31E-02 |
| 192.0437  | 66.96  | 15.62 | 16.02 | 13.47 | 15.06 | 3.71E-07 | 8.17E-01 | 1.44E-05 | 6.10E-01 | 5.16E-07 | 1.85E-01 | 4.92E-03 |
| 192.05037 | 178.01 | 16.40 | 14.07 | 16.33 | 15.30 | 9.80E-04 | 1.58E-03 | 9.99E-01 | 3.30E-01 | 3.24E-03 | 2.54E-01 | 4.15E-01 |
| 192.05534 | 85.09  | 19.06 | 21.77 | 21.84 | 21.35 | 1.28E-23 | 7.49E-14 | 7.16E-14 | 1.68E-13 | 9.96E-01 | 4.62E-01 | 3.25E-01 |
| 192.06547 | 39.43  | 19.52 | 17.88 | 19.39 | 18.94 | 4.74E-15 | 1.11E-13 | 9.13E-01 | 2.27E-02 | 6.64E-12 | 3.72E-06 | 1.28E-01 |
| 192.06549 | 213.94 | 17.43 | 14.87 | 15.04 | 15.53 | 5.33E-46 | 3.65E-14 | 3.65E-14 | 3.74E-14 | 6.96E-01 | 3.50E-04 | 1.32E-02 |
| 192.06914 | 55.25  | 17.57 | 16.04 | 16.57 | 15.96 | 1.01E-07 | 1.81E-06 | 3.33E-03 | 9.23E-07 | 2.81E-01 | 9.93E-01 | 1.86E-01 |
| 192.07396 | 70.89  | 14.55 | 15.54 | 13.84 | 15.10 | 2.77E-02 | 3.02E-01 | 5.87E-01 | 7.79E-01 | 1.95E-02 | 8.84E-01 | 1.50E-01 |
| 192.07878 | 104.19 | 15.86 | 14.59 | 14.38 | 14.15 | 2.16E-06 | 1.06E-03 | 6.70E-05 | 7.43E-06 | 9.21E-01 | 6.01E-01 | 9.20E-01 |
| 192.08656 | 293.08 | 18.18 | 16.79 | 16.78 | 16.76 | 1.03E-07 | 7.06E-06 | 4.51E-06 | 7.69E-06 | 1.00E+00 | 1.00E+00 | 1.00E+00 |
| 192.08678 | 20.59  | 17.64 | 13.57 | 14.50 | 14.96 | 3.24E-73 | 3.65E-14 | 3.65E-14 | 3.65E-14 | 3.74E-08 | 7.75E-14 | 1.70E-02 |
| 192.09614 | 288.11 | 18.25 | 18.25 | 17.94 | 17.74 | 3.63E-01 | 1.00E+00 | 7.56E-01 | 4.18E-01 | 7.89E-01 | 4.62E-01 | 9.42E-01 |
| 192.10198 | 278.27 | 18.13 | 16.35 | 16.39 | 16.36 | 2.80E-23 | 7.43E-14 | 7.36E-14 | 7.45E-14 | 9.96E-01 | 1.00E+00 | 9.97E-01 |
| 192.10504 | 283.08 | 20.36 | 19.05 | 18.80 | 19.31 | 1.55E-06 | 9.93E-05 | 1.94E-06 | 4.27E-03 | 8.54E-01 | 8.31E-01 | 3.60E-01 |
| 192.12302 | 159.29 | 16.30 | 15.03 | 13.99 | 14.98 | 7.58E-28 | 1.09E-01 | 5.59E-10 | 2.95E-04 | 7.74E-14 | 2.18E-08 | 8.38E-02 |
| 192.12302 | 55.97  | 17.35 | 17.88 | 15.77 | 16.36 | 1.27E-16 | 3.19E-11 | 3.65E-14 | 2.29E-11 | 1.34E-07 | 9.95E-01 | 9.08E-07 |
| 192.13826 | 259.22 | 17.90 | 16.46 | 16.15 | 16.79 | 1.33E-26 | 7.41E-14 | 3.83E-14 | 1.76E-11 | 1.62E-01 | 1.31E-01 | 1.96E-04 |
| 192.55646 | 86.85  | 16.75 | 18.37 | 18.47 | 18.28 | 9.53E-12 | 6.97E-09 | 6.09E-10 | 1.13E-07 | 9.84E-01 | 9.86E-01 | 8.96E-01 |
| 192.61395 | 24.33  | 13.61 | 14.48 | 12.77 | 16.42 | 1.89E-15 | 1.14E-01 | 1.35E-01 | 1.68E-10 | 1.55E-04 | 2.99E-05 | 7.61E-14 |
| 192.62263 | 23.78  | 14.56 | 12.41 | 16.16 | 15.31 | 2.07E-17 | 3.03E-07 | 1.99E-04 | 2.24E-01 | 7.44E-14 | 6.03E-11 | 1.50E-01 |
| 192.88861 | 108.8  | 18.84 | 12.96 | 14.65 | 13.59 | 5.06E-37 | 3.65E-14 | 7.05E-14 | 3.67E-14 | 2.96E-04 | 4.42E-01 | 5.92E-02 |
| 192.88861 | 267.11 | 17.91 | 12.21 | 12.76 | 13.72 | 4.02E-18 | 7.45E-14 | 1.41E-13 | 2.81E-09 | 8.26E-01 | 1.08E-01 | 4.69E-01 |
| 192.91041 | 34.91  | 17.00 | 16.45 | 16.55 | 16.69 | 1.21E-02 | 1.01E-02 | 4.95E-02 | 3.11E-01 | 9.42E-01 | 5.66E-01 | 8.74E-01 |
| 192.93302 | 258.29 | 19.21 | 15.95 | 15.50 | 17.17 | 4.86E-39 | 3.65E-14 | 3.65E-14 | 1.78E-13 | 2.81E-01 | 1.78E-05 | 2.03E-09 |
| 192.93996 | 292.87 | 17.23 | 11.90 | 12.42 | 14.21 | 4.29E-52 | 3.65E-14 | 3.65E-14 | 6.85E-14 | 2.55E-01 | 1.24E-12 | 2.78E-08 |
| 192.95733 | 97.87  | 17.49 | 9.78  | 12.88 | 11.92 | 2.94E-22 | 5.34E-14 | 7.77E-10 | 1.00E-12 | 9.99E-05 | 1.91E-02 | 5.46E-01 |
| 192.9749  | 97.35  | 13.84 | 15.39 | 15.71 | 14.70 | 9.10E-05 | 2.09E-03 | 9.04E-05 | 2.09E-01 | 8.78E-01 | 4.27E-01 | 1.11E-01 |
| 192.98074 | 38.36  | 17.63 | 12.25 | 12.73 | 13.82 | 3.62E-74 | 3.65E-14 | 3.65E-14 | 3.65E-14 | 1.05E-01 | 6.90E-11 | 7.02E-06 |
| 192.98676 | 126.92 | 12.20 | 14.31 | 12.96 | 14.46 | 1.29E-06 | 3.95E-05 | 3.35E-01 | 1.55E-05 | 2.27E-02 | 9.89E-01 | 1.07E-02 |
| 192.99862 | 72.25  | 16.51 | 14.86 | 15.47 | 15.38 | 4.01E-07 | 1.42E-07 | 1.49E-03 | 7.81E-04 | 1.67E-01 | 3.23E-01 | 9.91E-01 |
| 193.00381 | 41.73  | 18.23 | 17.02 | 19.15 | 18.25 | 8.95E-20 | 1.12E-08 | 1.65E-05 | 1.00E+00 | 6.43E-14 | 4.81E-08 | 7.61E-05 |
| 193.01533 | 99.73  | 17.30 | 14.93 | 14.90 | 15.59 | 1.47E-14 | 4.30E-12 | 1.84E-12 | 1.33E-06 | 1.00E+00 | 1.84E-01 | 1.55E-01 |
| 193.02774 | 61.43  | 16.34 | 14.47 | 15.46 | 14.52 | 5.16E-08 | 5.25E-07 | 4.28E-02 | 1.99E-06 | 2.50E-02 | 9.99E-01 | 4.29E-02 |
| 193.03665 | 78.12  | 17.49 | 15.61 | 15.73 | 15.98 | 1.69E-07 | 1.32E-06 | 5.34E-06 | 2.47E-04 | 9.87E-01 | 7.49E-01 | 9.02E-01 |
| 193.04639 | 89.57  | 15.86 | 16.02 | 15.93 | 16.19 | 2.77E-01 | 7.92E-01 | 9.82E-01 | 2.32E-01 | 9.49E-01 | 7.69E-01 | 4.38E-01 |
| 193.04973 | 84.72  | 13.23 | 16.32 | 12.56 | 14.59 | 4.70E-08 | 7.31E-06 | 6.97E-01 | 1.43E-01 | 7.20E-08 | 4.42E-02 | 1.10E-02 |
| 193.05545 | 80.28  | 17.55 | 18.95 | 18.97 | 19.01 | 9.53E-14 | 3.74E-10 | 1.40E-10 | 1.97E-10 | 1.00E+00 | 9.92E-01 | 9.98E-01 |
| 193.06439 | 65.54  | 15.91 | 15.16 | 14.62 | 16.01 | 1.01E-05 | 5.87E-02 | 9.97E-05 | 9.88E-01 | 2.82E-01 | 3.70E-02 | 7.41E-05 |
| 193.06816 | 74.9   | 22.41 | 22.20 | 22.20 | 22.13 | 7.80E-02 | 2.31E-01 | 2.36E-01 | 7.33E-02 | 1.00E+00 | 9.42E-01 | 9.32E-01 |
| 193.08185 | 87.67  | 17.80 | 18.00 | 18.32 | 17.91 | 6.78E-02 | 7.55E-01 | 4.66E-02 | 9.55E-01 | 4.03E-01 | 9.72E-01 | 2.05E-01 |
| 193.08589 | 177.63 | 16.77 | 14.71 | 14.66 | 15.39 | 6.71E-39 | 3.65E-14 | 3.65E-14 | 7.45E-14 | 9.91E-01 | 6.95E-05 | 1.68E-05 |
| 193.09713 | 169.77 | 16.99 | 14.10 | 14.17 | 15.04 | 3.37E-51 | 3.65E-14 | 3.65E-14 | 3.92E-14 | 9.82E-01 | 4.76E-07 | 2.27E-06 |

|           |        |       |       |       |       |          |          |          |          |          |          |          |
|-----------|--------|-------|-------|-------|-------|----------|----------|----------|----------|----------|----------|----------|
| 193.10851 | 201.03 | 16.69 | 14.13 | 14.67 | 14.38 | 5.36E-40 | 3.65E-14 | 3.76E-14 | 3.65E-14 | 8.81E-03 | 4.90E-01 | 3.36E-01 |
| 193.11658 | 25.25  | 15.11 | 16.33 | 12.68 | 16.54 | 1.31E-23 | 3.02E-03 | 1.52E-10 | 4.81E-04 | 7.36E-14 | 9.41E-01 | 6.78E-14 |
| 193.11842 | 204.18 | 16.31 | 11.01 | 13.28 | 12.13 | 6.71E-41 | 3.65E-14 | 7.52E-14 | 3.67E-14 | 2.11E-10 | 6.00E-03 | 3.51E-03 |
| 193.1222  | 23.27  | 17.82 | 16.47 | 16.96 | 17.03 | 1.10E-17 | 7.48E-14 | 5.56E-09 | 3.50E-07 | 3.53E-03 | 7.46E-04 | 9.47E-01 |
| 193.12221 | 292.15 | 18.77 | 18.03 | 18.20 | 18.00 | 3.30E-02 | 5.52E-02 | 2.01E-01 | 5.38E-02 | 9.38E-01 | 1.00E+00 | 9.19E-01 |
| 193.13115 | 53.72  | 18.27 | 17.17 | 17.42 | 17.16 | 1.12E-35 | 3.65E-14 | 7.07E-14 | 3.65E-14 | 1.44E-02 | 1.00E+00 | 1.54E-02 |
| 193.15859 | 23.19  | 17.32 | 15.32 | 16.12 | 16.36 | 4.00E-29 | 3.65E-14 | 1.47E-13 | 5.73E-09 | 1.21E-06 | 8.02E-10 | 4.01E-01 |
| 193.1587  | 161.59 | 17.92 | 17.02 | 16.99 | 17.48 | 5.67E-06 | 6.39E-05 | 2.58E-05 | 1.41E-01 | 9.99E-01 | 1.35E-01 | 9.17E-02 |
| 193.19503 | 214.22 | 16.56 | 13.82 | 13.66 | 13.94 | 1.69E-20 | 7.72E-14 | 7.54E-14 | 1.97E-13 | 9.55E-01 | 9.82E-01 | 8.15E-01 |
| 193.51222 | 250.6  | 15.13 | 15.73 | 15.18 | 14.57 | 1.95E-01 | 6.23E-01 | 9.99E-01 | 6.92E-01 | 7.08E-01 | 1.25E-01 | 6.41E-01 |
| 193.51224 | 143.61 | 16.73 | 18.25 | 17.29 | 16.01 | 7.05E-05 | 5.23E-03 | 6.02E-01 | 4.13E-01 | 1.66E-01 | 3.23E-05 | 3.94E-02 |
| 193.52545 | 30.49  | 15.28 | 12.82 | 16.43 | 15.57 | 3.46E-25 | 1.03E-13 | 5.94E-04 | 7.77E-01 | 3.87E-14 | 7.38E-14 | 2.82E-02 |
| 193.55669 | 86.16  | 17.54 | 22.21 | 22.05 | 21.41 | 3.01E-70 | 3.65E-14 | 3.65E-14 | 3.65E-14 | 8.59E-01 | 8.75E-04 | 1.12E-02 |
| 193.56694 | 74.83  | 17.12 | 15.64 | 15.36 | 15.85 | 1.05E-21 | 7.74E-14 | 7.01E-14 | 2.31E-11 | 3.74E-01 | 6.68E-01 | 3.55E-02 |
| 193.56981 | 78.05  | 19.63 | 19.20 | 19.16 | 19.15 | 7.46E-05 | 2.09E-03 | 4.53E-04 | 6.19E-04 | 9.84E-01 | 9.77E-01 | 1.00E+00 |
| 193.92986 | 275.96 | 22.37 | 21.03 | 20.15 | 22.16 | 3.44E-15 | 9.41E-06 | 1.64E-13 | 8.78E-01 | 9.60E-03 | 6.38E-04 | 1.32E-10 |
| 193.98255 | 75.58  | 18.17 | 18.03 | 18.03 | 17.85 | 5.29E-01 | 9.05E-01 | 9.03E-01 | 4.35E-01 | 1.00E+00 | 8.45E-01 | 8.42E-01 |
| 193.99797 | 45.76  | 20.30 | 19.38 | 19.49 | 19.14 | 1.70E-30 | 6.83E-14 | 7.53E-14 | 3.65E-14 | 5.87E-01 | 3.91E-02 | 6.38E-04 |
| 194.00441 | 165.61 | 14.19 | 17.70 | 16.41 | 15.59 | 5.67E-07 | 1.59E-07 | 1.60E-03 | 1.18E-01 | 1.68E-01 | 6.48E-03 | 5.64E-01 |
| 194.02225 | 50.09  | 19.26 | 19.27 | 19.83 | 19.72 | 1.93E-07 | 1.00E+00 | 8.83E-06 | 9.55E-04 | 2.96E-05 | 2.13E-03 | 7.92E-01 |
| 194.03137 | 92.8   | 17.33 | 16.71 | 16.79 | 17.46 | 1.89E-03 | 3.11E-02 | 7.63E-02 | 9.42E-01 | 9.84E-01 | 9.66E-03 | 2.56E-02 |
| 194.03796 | 47.79  | 16.30 | 15.14 | 14.90 | 15.35 | 1.92E-02 | 6.92E-02 | 1.68E-02 | 2.06E-01 | 9.63E-01 | 9.75E-01 | 8.08E-01 |
| 194.04878 | 73.46  | 19.57 | 18.83 | 19.15 | 19.51 | 1.44E-03 | 1.93E-03 | 1.69E-01 | 9.93E-01 | 4.05E-01 | 9.38E-03 | 3.38E-01 |
| 194.05774 | 88.56  | 17.30 | 19.06 | 18.91 | 18.56 | 3.63E-25 | 5.50E-14 | 7.27E-14 | 1.87E-12 | 7.87E-01 | 1.60E-02 | 1.53E-01 |
| 194.066   | 74.34  | 17.83 | 16.96 | 16.78 | 17.09 | 3.02E-18 | 1.98E-12 | 7.47E-14 | 3.28E-09 | 3.66E-01 | 7.31E-01 | 4.52E-02 |
| 194.07087 | 77.42  | 16.60 | 16.07 | 16.46 | 15.93 | 1.17E-01 | 3.03E-01 | 9.68E-01 | 1.49E-01 | 5.91E-01 | 9.76E-01 | 3.57E-01 |
| 194.07796 | 59.07  | 15.12 | 14.26 | 15.37 | 15.48 | 3.59E-02 | 2.01E-01 | 9.35E-01 | 8.53E-01 | 6.29E-02 | 4.34E-02 | 9.96E-01 |
| 194.08105 | 289.71 | 19.70 | 18.69 | 18.34 | 18.61 | 1.22E-03 | 2.89E-02 | 1.03E-03 | 1.93E-02 | 7.72E-01 | 9.97E-01 | 8.86E-01 |
| 194.09268 | 215.75 | 16.70 | 13.27 | 13.82 | 14.41 | 9.94E-32 | 3.65E-14 | 4.79E-14 | 7.72E-14 | 1.53E-01 | 1.90E-04 | 1.21E-01 |
| 194.10225 | 281.67 | 18.22 | 16.20 | 16.12 | 16.35 | 8.18E-20 | 7.64E-14 | 7.27E-14 | 8.07E-13 | 9.88E-01 | 9.29E-01 | 7.88E-01 |
| 194.1118  | 281.51 | 16.93 | 16.09 | 16.56 | 15.29 | 1.55E-12 | 2.67E-04 | 2.64E-01 | 9.35E-13 | 1.02E-01 | 1.46E-03 | 5.18E-08 |
| 194.11746 | 290.97 | 18.43 | 17.31 | 17.43 | 17.24 | 4.00E-07 | 1.25E-05 | 9.92E-05 | 5.50E-06 | 9.59E-01 | 9.91E-01 | 8.61E-01 |
| 194.12068 | 282.16 | 17.70 | 15.74 | 15.73 | 15.66 | 6.34E-20 | 8.20E-14 | 7.72E-14 | 7.74E-14 | 1.00E+00 | 9.87E-01 | 9.91E-01 |
| 194.12447 | 24.74  | 16.24 | 17.83 | 15.14 | 17.88 | 1.02E-38 | 8.84E-14 | 5.16E-08 | 8.66E-14 | 3.65E-14 | 9.96E-01 | 3.65E-14 |
| 194.15398 | 207.6  | 16.63 | 14.21 | 14.87 | 14.93 | 1.46E-38 | 3.65E-14 | 4.21E-14 | 6.07E-14 | 1.98E-04 | 6.71E-05 | 9.78E-01 |
| 194.49926 | 96.88  | 17.66 | 9.06  | 11.21 | 11.40 | 9.02E-49 | 3.65E-14 | 3.65E-14 | 3.65E-14 | 3.79E-05 | 1.28E-05 | 9.79E-01 |
| 194.51928 | 274.34 | 13.57 | 17.79 | 18.45 | 16.95 | 3.12E-52 | 3.65E-14 | 3.65E-14 | 3.65E-14 | 5.35E-02 | 9.76E-03 | 2.48E-07 |
| 194.52324 | 161.97 | 13.37 | 16.24 | 15.76 | 13.60 | 2.05E-13 | 2.13E-10 | 9.69E-08 | 9.49E-01 | 6.68E-01 | 3.45E-08 | 6.74E-06 |
| 194.55672 | 86.57  | 17.93 | 19.40 | 19.29 | 19.02 | 1.69E-24 | 6.29E-14 | 7.26E-14 | 1.15E-12 | 8.52E-01 | 4.13E-02 | 2.32E-01 |
| 194.56389 | 84.56  | 15.44 | 17.02 | 17.00 | 16.56 | 1.30E-16 | 1.23E-13 | 1.40E-13 | 1.51E-07 | 9.99E-01 | 1.06E-01 | 1.32E-01 |
| 194.62604 | 24.98  | 14.39 | 15.22 | 11.97 | 15.45 | 3.36E-20 | 7.98E-02 | 1.24E-10 | 1.56E-02 | 7.29E-14 | 9.18E-01 | 7.45E-14 |
| 194.93046 | 106.42 | 17.66 | 14.37 | 13.62 | 15.94 | 5.99E-26 | 7.49E-14 | 4.07E-14 | 1.26E-05 | 1.48E-01 | 1.49E-04 | 5.14E-09 |
| 194.93399 | 278.08 | 16.91 | 11.42 | 10.12 | 13.80 | 2.00E-43 | 3.65E-14 | 3.65E-14 | 5.47E-12 | 9.13E-03 | 3.30E-07 | 7.59E-14 |
| 194.94568 | 39.8   | 15.97 | 17.57 | 17.65 | 17.84 | 9.85E-31 | 6.58E-14 | 4.79E-14 | 3.76E-14 | 9.37E-01 | 3.15E-01 | 6.48E-01 |
| 194.96669 | 39.28  | 17.57 | 19.21 | 19.77 | 19.30 | 5.63E-34 | 6.87E-14 | 3.65E-14 | 6.25E-14 | 2.82E-03 | 9.44E-01 | 2.25E-02 |
| 194.99038 | 88.53  | 19.32 | 21.67 | 21.96 | 21.36 | 5.20E-26 | 7.34E-14 | 4.65E-14 | 8.58E-14 | 6.14E-01 | 5.88E-01 | 6.86E-02 |
| 195.00318 | 98.13  | 18.50 | 19.11 | 18.50 | 18.73 | 3.74E-05 | 9.18E-05 | 1.00E+00 | 3.84E-01 | 1.48E-04 | 4.53E-02 | 4.10E-01 |
| 195.00488 | 171.22 | 11.36 | 13.87 | 14.77 | 13.12 | 1.12E-07 | 1.11E-04 | 4.77E-08 | 1.62E-02 | 4.19E-01 | 6.10E-01 | 3.38E-02 |
| 195.01154 | 105.47 | 15.61 | 13.00 | 13.80 | 13.01 | 5.29E-07 | 3.83E-06 | 2.36E-03 | 7.41E-06 | 4.15E-01 | 1.00E+00 | 4.43E-01 |
| 195.02539 | 51.81  | 14.70 | 12.82 | 14.07 | 14.48 | 4.32E-03 | 3.33E-03 | 6.44E-01 | 9.79E-01 | 1.10E-01 | 2.10E-02 | 8.90E-01 |
| 195.04448 | 165.75 | 10.09 | 13.99 | 13.96 | 13.53 | 5.26E-15 | 3.99E-12 | 3.96E-12 | 2.28E-09 | 1.00E+00 | 8.26E-01 | 8.55E-01 |
| 195.0471  | 91.53  | 16.74 | 14.79 | 14.82 | 15.22 | 1.04E-15 | 4.28E-13 | 6.07E-13 | 3.23E-08 | 9.99E-01 | 3.30E-01 | 3.96E-01 |
| 195.05155 | 64.56  | 18.25 | 17.38 | 17.39 | 17.74 | 5.17E-05 | 1.92E-04 | 2.19E-04 | 7.72E-02 | 1.00E+00 | 3.46E-01 | 3.76E-01 |
| 195.05695 | 84.84  | 18.48 | 20.81 | 20.32 | 20.36 | 4.31E-31 | 3.65E-14 | 7.05E-14 | 7.16E-14 | 3.58E-02 | 8.43E-02 | 9.95E-01 |
| 195.0615  | 84.49  | 16.22 | 17.45 | 16.31 | 17.59 | 1.22E-08 | 2.39E-05 | 9.85E-01 | 3.70E-06 | 1.66E-04 | 9.56E-01 | 2.88E-05 |
| 195.06542 | 81.08  | 18.26 | 21.53 | 21.49 | 20.77 | 3.41E-47 | 3.65E-14 | 3.65E-14 | 3.70E-14 | 9.97E-01 | 1.58E-03 | 2.94E-03 |
| 195.0696  | 228.65 | 17.37 | 19.02 | 18.74 | 18.55 | 1.77E-13 | 9.42E-13 | 1.98E-09 | 7.43E-07 | 5.45E-01 | 1.41E-01 | 8.21E-01 |
| 195.07541 | 20.86  | 16.66 | 12.10 | 12.72 | 13.67 | 1.00E-46 | 3.65E-14 | 3.65E-14 | 5.01E-14 | 9.00E-02 | 1.37E-07 | 2.59E-03 |
| 195.07641 | 191.43 | 17.47 | 14.58 | 14.73 | 15.21 | 4.45E-39 | 3.65E-14 | 3.65E-14 | 5.21E-14 | 8.77E-01 | 1.44E-02 | 9.53E-02 |
| 195.08757 | 283.1  | 21.19 | 18.32 | 17.60 | 18.22 | 2.62E-17 | 6.72E-11 | 7.34E-14 | 4.47E-11 | 2.98E-01 | 9.95E-01 | 4.61E-01 |
| 195.0876  | 24.73  | 20.34 | 15.86 | 15.38 | 16.62 | 2.84E-33 | 3.83E-14 | 3.65E-14 | 7.43E-14 | 5.84E-01 | 2.06E-01 | 8.16E-03 |
| 195.09668 | 202.82 | 15.77 | 13.36 | 13.81 | 13.74 | 1.41E-07 | 4.73E-07 | 5.03E-05 | 4.83E-05 | 7.40E-01 | 8.45E-01 | 9.98E-01 |
| 195.10146 | 281.7  | 18.58 | 17.43 | 17.38 | 17.27 | 4.87E-10 | 6.15E-07 | 1.41E-07 | 2.72E-08 | 9.96E-01 | 8.89E-01 | 9.58E-01 |
| 195.11275 | 283.25 | 17.16 | 15.42 | 15.46 | 15.89 | 8.85E-14 | 9.30E-12 | 1.92E-11 | 1.31E-06 | 9.98E-01 | 2.32E-01 | 3.09E-01 |
| 195.11276 | 22.91  | 16.79 | 12.67 | 13.21 | 13.90 | 6.56E-72 | 3.65E-14 | 3.65E-14 | 3.65E-14 | 5.39E-03 | 3.06E-11 | 3.30E-04 |
| 195.11287 | 183.17 | 17.82 | 14.89 | 14.80 | 15.78 | 1.84E-33 | 3.67E-14 | 3.65E-14 | 7.93E-14 | 9.85E-01 | 1.72E-03 | 4.22E-04 |
| 195.12269 | 263.4  | 17.45 | 16.70 | 16.39 | 16.83 | 5.06E-11 | 2.80E-06 | 1.54E-11 | 2.39E-04 | 1.56E-01 | 8.32E-01 | 2.09E-02 |
| 195.13785 | 282.55 | 19.50 | 17.89 | 17.91 | 17.97 | 9.23E-12 | 2.92E-09 | 2.87E-09 | 3.75E-08 | 1.00E+00 | 9.91E-01 | 9.95E-01 |

|           |        |       |       |       |       |          |          |          |          |          |          |          |
|-----------|--------|-------|-------|-------|-------|----------|----------|----------|----------|----------|----------|----------|
| 195.17433 | 20.62  | 16.72 | 13.41 | 13.84 | 14.42 | 1.26E-55 | 3.65E-14 | 3.65E-14 | 3.65E-14 | 5.39E-02 | 9.82E-08 | 4.18E-03 |
| 195.1744  | 171.61 | 17.77 | 15.00 | 15.06 | 15.78 | 1.48E-30 | 3.74E-14 | 3.83E-14 | 8.24E-14 | 9.91E-01 | 6.75E-03 | 1.52E-02 |
| 195.54474 | 81.85  | 14.83 | 12.53 | 14.65 | 15.46 | 7.27E-08 | 1.27E-05 | 9.82E-01 | 5.61E-01 | 1.04E-04 | 9.93E-08 | 3.63E-01 |
| 195.55864 | 85.37  | 16.46 | 16.73 | 16.28 | 16.63 | 1.98E-01 | 6.11E-01 | 8.14E-01 | 8.77E-01 | 1.73E-01 | 9.73E-01 | 4.00E-01 |
| 195.56587 | 83.48  | 15.67 | 17.74 | 17.74 | 16.90 | 9.16E-13 | 9.48E-11 | 6.37E-11 | 3.30E-04 | 1.00E+00 | 3.37E-02 | 3.17E-02 |
| 195.57137 | 215.98 | 14.50 | 14.68 | 14.17 | 14.83 | 1.40E-01 | 9.22E-01 | 6.21E-01 | 6.79E-01 | 2.84E-01 | 9.62E-01 | 1.17E-01 |
| 195.93041 | 241.13 | 19.69 | 16.61 | 15.65 | 18.71 | 2.94E-37 | 5.38E-14 | 3.65E-14 | 3.40E-03 | 4.33E-03 | 6.25E-11 | 6.87E-14 |
| 195.9586  | 280.79 | 17.47 | 19.17 | 19.32 | 18.29 | 2.57E-27 | 6.63E-14 | 4.19E-14 | 5.40E-06 | 7.93E-01 | 3.03E-06 | 2.54E-08 |
| 195.96808 | 278.72 | 23.65 | 23.04 | 23.00 | 22.88 | 1.55E-01 | 3.35E-01 | 2.80E-01 | 1.72E-01 | 1.00E+00 | 9.78E-01 | 9.89E-01 |
| 195.97734 | 60.95  | 16.71 | 12.80 | 15.08 | 14.34 | 5.09E-17 | 7.32E-14 | 3.76E-04 | 2.01E-07 | 5.17E-07 | 2.07E-03 | 2.99E-01 |
| 195.98549 | 101.59 | 16.80 | 16.23 | 17.48 | 16.40 | 2.69E-06 | 7.88E-02 | 2.11E-02 | 3.48E-01 | 3.32E-06 | 9.11E-01 | 1.17E-04 |
| 195.99345 | 279.44 | 17.28 | 11.15 | 8.73  | 12.81 | 1.78E-53 | 3.65E-14 | 3.65E-14 | 6.85E-14 | 1.56E-07 | 9.92E-04 | 7.32E-14 |
| 195.99383 | 54.5   | 17.84 | 18.89 | 19.60 | 18.86 | 2.50E-27 | 1.65E-12 | 3.65E-14 | 2.29E-11 | 4.49E-06 | 9.96E-01 | 2.71E-06 |
| 196.01293 | 36.69  | 18.55 | 19.40 | 21.02 | 18.53 | 2.94E-26 | 7.60E-04 | 4.72E-14 | 1.00E+00 | 3.50E-11 | 1.14E-03 | 6.12E-14 |
| 196.01913 | 290.48 | 15.70 | 15.75 | 16.15 | 14.85 | 2.45E-05 | 9.96E-01 | 2.52E-01 | 5.54E-03 | 3.94E-01 | 3.89E-03 | 6.76E-06 |
| 196.04194 | 76.03  | 17.36 | 17.14 | 15.60 | 16.41 | 2.87E-05 | 9.36E-01 | 3.42E-05 | 7.72E-02 | 6.75E-04 | 2.82E-01 | 1.83E-01 |
| 196.05608 | 85.79  | 17.26 | 17.28 | 17.05 | 17.22 | 4.44E-01 | 9.99E-01 | 5.11E-01 | 9.91E-01 | 4.47E-01 | 9.74E-01 | 7.37E-01 |
| 196.06042 | 168.91 | 17.66 | 14.86 | 14.62 | 15.55 | 1.48E-36 | 3.65E-14 | 3.65E-14 | 7.34E-14 | 6.61E-01 | 1.34E-02 | 2.27E-04 |
| 196.06253 | 95.49  | 16.05 | 18.51 | 18.34 | 17.87 | 2.89E-32 | 3.65E-14 | 3.76E-14 | 7.52E-14 | 8.09E-01 | 8.61E-03 | 8.93E-02 |
| 196.06746 | 84.76  | 15.45 | 14.98 | 15.32 | 14.90 | 1.02E-01 | 2.43E-01 | 9.55E-01 | 1.42E-01 | 5.45E-01 | 9.89E-01 | 3.74E-01 |
| 196.07339 | 46.37  | 20.27 | 21.15 | 21.61 | 21.26 | 2.47E-16 | 4.71E-08 | 7.51E-14 | 2.39E-09 | 1.41E-02 | 9.05E-01 | 1.06E-01 |
| 196.09559 | 282.72 | 16.52 | 13.82 | 13.13 | 15.08 | 8.38E-11 | 4.62E-07 | 1.45E-10 | 2.16E-02 | 5.14E-01 | 7.16E-02 | 1.02E-03 |
| 196.1     | 23.75  | 16.50 | 11.21 | 11.63 | 12.28 | 3.35E-66 | 3.65E-14 | 3.65E-14 | 3.65E-14 | 2.69E-01 | 9.57E-05 | 3.99E-02 |
| 196.10699 | 201.59 | 15.36 | 9.20  | 9.36  | 10.25 | 1.99E-33 | 3.65E-14 | 3.67E-14 | 7.18E-14 | 9.87E-01 | 1.62E-01 | 2.90E-01 |
| 196.11122 | 24.58  | 14.59 | 17.54 | 13.79 | 17.24 | 4.41E-13 | 4.61E-07 | 4.17E-01 | 1.32E-05 | 2.95E-10 | 9.49E-01 | 1.63E-08 |
| 196.13328 | 180.07 | 17.26 | 14.76 | 15.13 | 15.26 | 2.43E-29 | 3.72E-14 | 6.54E-14 | 7.34E-14 | 2.83E-01 | 8.91E-02 | 9.21E-01 |
| 196.14134 | 170.05 | 16.40 | 12.69 | 12.57 | 12.56 | 1.22E-20 | 7.74E-14 | 7.41E-14 | 7.67E-14 | 9.93E-01 | 9.91E-01 | 1.00E+00 |
| 196.5147  | 36.68  | 14.43 | 15.85 | 17.81 | 14.82 | 1.68E-17 | 8.28E-04 | 7.53E-14 | 7.30E-01 | 2.06E-06 | 4.25E-02 | 1.52E-12 |
| 196.55738 | 86.81  | 20.15 | 18.46 | 18.90 | 18.31 | 2.92E-15 | 4.43E-12 | 2.41E-07 | 3.23E-13 | 2.14E-01 | 9.20E-01 | 5.72E-02 |
| 196.56677 | 84.8   | 16.48 | 20.55 | 20.07 | 19.09 | 1.78E-55 | 3.65E-14 | 3.65E-14 | 3.67E-14 | 1.01E-01 | 4.51E-10 | 3.26E-05 |
| 196.59478 | 26.75  | 15.49 | 16.00 | 16.64 | 18.01 | 5.03E-10 | 4.82E-01 | 6.75E-03 | 2.30E-10 | 2.91E-01 | 1.05E-06 | 1.46E-03 |
| 196.60891 | 24.88  | 12.54 | 15.48 | 11.27 | 16.26 | 5.37E-29 | 4.24E-11 | 9.51E-03 | 7.52E-14 | 7.34E-14 | 2.65E-01 | 4.19E-14 |
| 196.69629 | 241.14 | 15.87 | 14.72 | 16.39 | 14.98 | 6.11E-09 | 1.95E-04 | 2.26E-01 | 7.96E-03 | 5.17E-08 | 8.16E-01 | 8.60E-06 |
| 196.85703 | 50.38  | 18.82 | 19.45 | 19.44 | 19.20 | 1.45E-05 | 6.19E-05 | 7.81E-05 | 4.00E-02 | 1.00E+00 | 3.43E-01 | 3.86E-01 |
| 196.86501 | 49.94  | 17.10 | 17.97 | 18.07 | 18.16 | 1.16E-03 | 1.82E-02 | 5.74E-03 | 2.86E-03 | 9.88E-01 | 9.23E-01 | 9.89E-01 |
| 196.87784 | 101.73 | 16.13 | 19.89 | 16.99 | 19.68 | 3.07E-30 | 4.32E-14 | 3.81E-02 | 6.54E-14 | 7.78E-14 | 9.31E-01 | 5.75E-13 |
| 196.92827 | 99.64  | 18.59 | 15.63 | 16.50 | 15.79 | 9.52E-12 | 1.71E-10 | 7.53E-06 | 4.13E-09 | 1.81E-01 | 9.83E-01 | 3.77E-01 |
| 196.95213 | 267.71 | 19.19 | 18.72 | 19.35 | 19.21 | 5.02E-02 | 1.73E-01 | 8.91E-01 | 1.00E+00 | 3.81E-02 | 1.85E-01 | 9.34E-01 |
| 196.9587  | 47.08  | 15.19 | 12.37 | 15.13 | 13.68 | 1.22E-11 | 3.58E-10 | 9.99E-01 | 2.32E-03 | 1.95E-09 | 1.47E-02 | 4.82E-03 |
| 196.96336 | 91.26  | 17.12 | 16.02 | 16.36 | 15.76 | 1.11E-08 | 3.85E-06 | 2.31E-03 | 1.86E-08 | 4.19E-01 | 6.61E-01 | 4.22E-02 |
| 196.97164 | 126.79 | 17.95 | 16.75 | 17.83 | 16.52 | 6.88E-13 | 1.93E-07 | 9.46E-01 | 1.09E-09 | 5.19E-06 | 7.08E-01 | 4.39E-08 |
| 196.98356 | 42.06  | 18.59 | 17.70 | 18.69 | 18.93 | 1.33E-07 | 1.05E-04 | 9.60E-01 | 3.62E-01 | 2.05E-05 | 2.01E-07 | 6.73E-01 |
| 196.98792 | 85.24  | 16.90 | 18.32 | 18.67 | 18.23 | 1.17E-17 | 1.57E-11 | 7.32E-14 | 7.55E-10 | 2.89E-01 | 9.69E-01 | 1.30E-01 |
| 197.00252 | 32.71  | 20.58 | 12.31 | 14.80 | 16.46 | 3.78E-57 | 3.65E-14 | 3.65E-14 | 6.41E-14 | 2.32E-09 | 6.87E-14 | 1.68E-04 |
| 197.04089 | 75.3   | 17.24 | 16.19 | 16.29 | 16.93 | 1.21E-05 | 7.11E-05 | 3.32E-04 | 5.69E-01 | 9.78E-01 | 1.69E-02 | 4.74E-02 |
| 197.04838 | 24.77  | 11.90 | 15.36 | 11.54 | 16.27 | 1.33E-17 | 2.53E-08 | 9.16E-01 | 7.07E-12 | 1.79E-09 | 4.19E-01 | 5.31E-13 |
| 197.05593 | 121.68 | 14.59 | 16.66 | 16.17 | 15.37 | 6.27E-08 | 7.55E-08 | 5.12E-05 | 1.34E-01 | 5.20E-01 | 3.38E-03 | 1.34E-01 |
| 197.059   | 84.6   | 22.79 | 21.68 | 22.12 | 21.44 | 2.25E-07 | 2.33E-05 | 2.38E-02 | 4.27E-07 | 2.50E-01 | 7.87E-01 | 3.23E-02 |
| 197.06735 | 85.05  | 15.60 | 16.62 | 16.43 | 15.95 | 1.63E-08 | 5.55E-08 | 9.56E-06 | 1.79E-01 | 7.13E-01 | 1.73E-03 | 4.11E-02 |
| 197.07673 | 46.11  | 16.83 | 16.80 | 17.39 | 17.24 | 2.15E-03 | 9.97E-01 | 1.15E-02 | 1.24E-01 | 8.41E-03 | 9.31E-02 | 8.68E-01 |
| 197.08102 | 200.96 | 16.30 | 13.20 | 14.04 | 14.04 | 5.17E-21 | 6.94E-14 | 1.88E-12 | 9.39E-12 | 2.84E-02 | 3.69E-02 | 1.00E+00 |
| 197.0926  | 286.66 | 17.90 | 14.90 | 13.46 | 15.76 | 6.92E-26 | 1.21E-13 | 3.72E-14 | 1.31E-07 | 6.63E-04 | 1.11E-01 | 2.71E-08 |
| 197.10094 | 65.39  | 16.75 | 15.54 | 15.97 | 17.22 | 2.70E-11 | 1.62E-06 | 3.42E-03 | 1.90E-01 | 2.67E-01 | 2.38E-10 | 2.26E-06 |
| 197.1124  | 199.43 | 17.47 | 13.96 | 14.27 | 14.78 | 8.35E-52 | 3.65E-14 | 3.65E-14 | 3.65E-14 | 3.68E-01 | 2.68E-04 | 4.75E-02 |
| 197.11729 | 158.98 | 18.25 | 11.87 | 12.78 | 12.90 | 1.45E-78 | 3.65E-14 | 3.65E-14 | 3.65E-14 | 9.23E-04 | 2.01E-04 | 9.54E-01 |
| 197.11883 | 26.52  | 18.71 | 22.30 | 20.24 | 22.13 | 6.48E-32 | 3.67E-14 | 5.80E-07 | 4.03E-14 | 7.48E-11 | 9.41E-01 | 5.45E-09 |
| 197.12843 | 209.01 | 16.93 | 14.79 | 14.88 | 15.11 | 3.25E-30 | 3.87E-14 | 4.34E-14 | 7.43E-14 | 9.58E-01 | 3.38E-01 | 6.29E-01 |
| 197.15351 | 23.9   | 17.10 | 14.82 | 14.60 | 15.20 | 1.17E-42 | 3.65E-14 | 3.65E-14 | 4.01E-14 | 5.34E-01 | 1.01E-01 | 1.97E-03 |
| 197.15352 | 292.16 | 17.74 | 16.69 | 16.61 | 16.55 | 8.90E-09 | 4.73E-06 | 6.75E-07 | 4.22E-07 | 9.86E-01 | 9.30E-01 | 9.92E-01 |
| 197.18998 | 201.91 | 16.48 | 13.53 | 13.59 | 14.71 | 6.37E-32 | 3.67E-14 | 3.67E-14 | 1.22E-11 | 9.96E-01 | 1.91E-05 | 4.30E-05 |
| 197.52056 | 266.75 | 16.99 | 18.76 | 18.21 | 17.77 | 4.60E-06 | 1.78E-06 | 1.71E-03 | 1.10E-01 | 3.75E-01 | 2.84E-02 | 5.95E-01 |
| 197.56574 | 85.51  | 14.89 | 17.02 | 16.54 | 16.06 | 7.19E-36 | 3.65E-14 | 4.12E-14 | 2.96E-13 | 5.67E-03 | 5.08E-09 | 7.86E-03 |
| 197.57379 | 78.36  | 17.27 | 16.88 | 16.60 | 16.79 | 5.49E-02 | 3.93E-01 | 3.56E-02 | 2.32E-01 | 6.98E-01 | 9.85E-01 | 8.93E-01 |
| 197.61673 | 24.67  | 11.30 | 12.58 | 9.53  | 15.07 | 2.42E-24 | 2.14E-02 | 4.02E-04 | 1.31E-13 | 7.66E-10 | 1.45E-06 | 3.92E-14 |
| 197.62084 | 24.24  | 16.99 | 19.96 | 17.94 | 20.04 | 2.73E-34 | 3.67E-14 | 3.75E-04 | 3.67E-14 | 1.19E-13 | 9.88E-01 | 9.56E-14 |
| 197.63487 | 24.1   | 13.34 | 16.05 | 13.24 | 16.93 | 1.54E-20 | 8.88E-10 | 9.95E-01 | 8.14E-14 | 5.56E-10 | 1.71E-01 | 7.85E-14 |
| 197.64376 | 20.1   | 11.04 | 13.37 | 14.34 | 13.28 | 8.37E-09 | 5.60E-05 | 3.71E-09 | 1.98E-04 | 2.61E-01 | 9.98E-01 | 2.03E-01 |
| 197.70719 | 94.6   | 19.05 | 12.77 | 14.21 | 13.74 | 2.39E-44 | 3.65E-14 | 3.65E-14 | 3.65E-14 | 1.10E-03 | 6.76E-02 | 6.23E-01 |

|           |        |       |       |       |       |          |          |          |          |          |          |          |
|-----------|--------|-------|-------|-------|-------|----------|----------|----------|----------|----------|----------|----------|
| 197.92587 | 131.63 | 18.50 | 15.66 | 15.98 | 17.28 | 1.49E-22 | 7.16E-14 | 7.29E-14 | 1.06E-04 | 6.54E-01 | 3.97E-07 | 6.22E-05 |
| 197.9518  | 58.14  | 18.80 | 13.19 | 13.56 | 15.72 | 2.58E-30 | 3.70E-14 | 4.12E-14 | 9.43E-10 | 8.47E-01 | 1.44E-06 | 4.60E-05 |
| 197.96437 | 124    | 15.49 | 14.28 | 15.03 | 14.91 | 1.83E-04 | 4.42E-05 | 3.05E-01 | 1.42E-01 | 2.85E-02 | 1.12E-01 | 9.69E-01 |
| 197.97249 | 126.07 | 17.18 | 15.12 | 16.10 | 15.39 | 1.95E-22 | 6.58E-14 | 3.18E-07 | 7.43E-14 | 7.86E-06 | 5.62E-01 | 2.76E-03 |
| 197.98082 | 48.33  | 15.79 | 17.13 | 16.65 | 17.20 | 8.78E-10 | 3.97E-08 | 7.01E-04 | 1.77E-08 | 1.53E-01 | 9.91E-01 | 8.86E-02 |
| 198.00133 | 94.91  | 15.87 | 18.28 | 18.81 | 17.96 | 8.93E-21 | 1.14E-13 | 7.21E-14 | 1.11E-10 | 2.85E-01 | 7.23E-01 | 2.88E-02 |
| 198.00755 | 29.49  | 11.76 | 16.37 | 18.16 | 17.61 | 1.21E-38 | 6.43E-14 | 3.65E-14 | 3.65E-14 | 3.52E-04 | 3.28E-02 | 6.16E-01 |
| 198.01845 | 97.62  | 16.59 | 14.64 | 15.84 | 15.38 | 1.94E-04 | 6.85E-05 | 3.01E-01 | 3.48E-02 | 3.84E-02 | 3.83E-01 | 7.42E-01 |
| 198.02292 | 104.67 | 19.12 | 17.03 | 18.30 | 17.10 | 1.26E-14 | 2.72E-12 | 1.40E-02 | 3.90E-11 | 4.55E-05 | 9.95E-01 | 2.00E-04 |
| 198.02842 | 94.11  | 14.51 | 15.43 | 13.91 | 14.38 | 5.99E-02 | 3.33E-01 | 6.83E-01 | 9.96E-01 | 3.50E-02 | 2.68E-01 | 8.43E-01 |
| 198.03732 | 86.74  | 15.37 | 16.20 | 16.10 | 16.14 | 1.72E-04 | 5.79E-04 | 2.93E-03 | 2.26E-03 | 9.67E-01 | 9.94E-01 | 9.97E-01 |
| 198.04379 | 28.84  | 15.76 | 16.78 | 16.06 | 17.04 | 7.68E-05 | 3.83E-03 | 7.43E-01 | 2.37E-04 | 8.36E-02 | 8.50E-01 | 1.03E-02 |
| 198.0528  | 192.95 | 17.03 | 19.58 | 15.42 | 18.16 | 2.09E-10 | 6.49E-05 | 2.36E-02 | 2.14E-01 | 7.01E-11 | 8.63E-02 | 4.23E-05 |
| 198.05305 | 93.63  | 22.75 | 22.83 | 23.02 | 22.66 | 3.92E-02 | 9.18E-01 | 1.30E-01 | 8.74E-01 | 4.45E-01 | 5.39E-01 | 2.80E-02 |
| 198.06118 | 94.69  | 17.49 | 14.57 | 15.12 | 14.78 | 9.99E-30 | 3.74E-14 | 7.39E-14 | 5.72E-14 | 1.17E-01 | 8.41E-01 | 5.35E-01 |
| 198.07151 | 45.91  | 15.46 | 16.40 | 17.03 | 16.90 | 5.00E-16 | 3.91E-06 | 8.38E-14 | 4.98E-12 | 6.02E-03 | 5.77E-02 | 9.08E-01 |
| 198.07584 | 120.18 | 21.98 | 20.36 | 20.41 | 20.57 | 4.09E-13 | 8.29E-11 | 1.97E-10 | 3.32E-08 | 9.97E-01 | 8.28E-01 | 9.12E-01 |
| 198.08667 | 69.41  | 20.78 | 20.35 | 20.18 | 20.42 | 3.66E-06 | 1.06E-03 | 1.42E-06 | 1.31E-02 | 4.72E-01 | 9.24E-01 | 1.77E-01 |
| 198.09759 | 30.5   | 26.55 | 25.54 | 25.56 | 25.45 | 4.82E-06 | 1.61E-04 | 1.71E-04 | 4.74E-05 | 1.00E+00 | 9.80E-01 | 9.71E-01 |
| 198.11234 | 286.63 | 17.54 | 16.19 | 16.39 | 16.24 | 8.53E-19 | 7.51E-14 | 3.51E-12 | 1.10E-13 | 5.51E-01 | 9.90E-01 | 7.63E-01 |
| 198.12191 | 282.26 | 17.46 | 16.79 | 17.35 | 15.53 | 2.27E-17 | 7.57E-03 | 9.53E-01 | 7.56E-14 | 4.23E-02 | 1.58E-07 | 1.06E-13 |
| 198.12242 | 20.08  | 16.45 | 15.33 | 14.75 | 16.33 | 1.44E-15 | 1.38E-06 | 2.38E-13 | 9.42E-01 | 4.03E-02 | 6.69E-05 | 8.22E-11 |
| 198.12704 | 22.94  | 18.43 | 21.67 | 19.71 | 21.50 | 3.71E-35 | 3.65E-14 | 8.39E-07 | 3.70E-14 | 4.04E-13 | 9.11E-01 | 6.58E-11 |
| 198.14886 | 169.56 | 17.47 | 15.21 | 15.50 | 15.59 | 1.02E-23 | 6.58E-14 | 7.46E-14 | 8.26E-14 | 5.54E-01 | 3.31E-01 | 9.75E-01 |
| 198.44407 | 105    | 15.67 | 12.89 | 14.98 | 14.34 | 7.54E-13 | 3.25E-13 | 1.89E-01 | 1.21E-03 | 6.12E-08 | 5.30E-04 | 2.81E-01 |
| 198.48749 | 278.34 | 17.61 | 14.76 | 15.61 | 16.21 | 2.49E-09 | 8.50E-10 | 2.12E-05 | 7.80E-03 | 2.01E-01 | 7.73E-03 | 5.44E-01 |
| 198.48763 | 112.66 | 17.65 | 14.35 | 15.22 | 15.34 | 1.50E-20 | 7.21E-14 | 1.77E-12 | 8.23E-11 | 3.94E-02 | 1.84E-02 | 9.84E-01 |
| 198.51912 | 93.38  | 16.86 | 9.87  | 12.36 | 11.85 | 7.49E-44 | 3.65E-14 | 4.45E-14 | 3.72E-14 | 1.48E-08 | 2.02E-05 | 5.89E-01 |
| 198.52281 | 103.95 | 15.29 | 10.77 | 15.11 | 12.36 | 4.85E-14 | 8.08E-12 | 9.90E-01 | 2.12E-05 | 1.40E-10 | 6.34E-02 | 1.19E-04 |
| 198.53712 | 85.64  | 16.58 | 19.89 | 20.37 | 19.14 | 2.51E-27 | 7.09E-14 | 3.87E-14 | 9.28E-13 | 4.58E-01 | 1.14E-01 | 1.56E-03 |
| 198.57592 | 77.73  | 16.93 | 16.76 | 16.57 | 16.58 | 4.57E-01 | 9.11E-01 | 4.85E-01 | 5.42E-01 | 8.85E-01 | 9.10E-01 | 1.00E+00 |
| 198.59575 | 26.23  | 15.35 | 15.01 | 14.84 | 17.47 | 1.94E-11 | 7.83E-01 | 4.78E-01 | 1.55E-07 | 9.65E-01 | 3.42E-09 | 1.81E-10 |
| 198.62864 | 24.29  | 16.55 | 19.28 | 17.19 | 19.28 | 6.28E-32 | 4.12E-14 | 2.68E-02 | 4.54E-14 | 7.70E-14 | 1.00E+00 | 8.24E-14 |
| 198.64267 | 23.52  | 13.22 | 14.95 | 13.26 | 14.58 | 3.42E-04 | 2.26E-03 | 1.00E+00 | 3.22E-02 | 4.18E-03 | 8.87E-01 | 4.83E-02 |
| 198.8543  | 47.62  | 17.12 | 17.88 | 17.85 | 17.66 | 2.38E-07 | 1.64E-06 | 3.67E-06 | 1.84E-03 | 9.97E-01 | 4.58E-01 | 5.80E-01 |
| 198.86204 | 49.76  | 17.25 | 17.94 | 18.04 | 18.25 | 3.51E-03 | 6.88E-02 | 2.40E-02 | 3.45E-03 | 9.84E-01 | 7.26E-01 | 8.98E-01 |
| 198.87595 | 110.07 | 13.53 | 15.69 | 11.48 | 16.08 | 8.57E-26 | 6.73E-07 | 2.15E-06 | 9.24E-09 | 7.16E-14 | 7.88E-01 | 5.67E-14 |
| 198.959   | 105.35 | 16.68 | 18.02 | 17.25 | 17.02 | 3.57E-04 | 1.36E-04 | 2.50E-01 | 7.19E-01 | 7.52E-02 | 1.31E-02 | 8.88E-01 |
| 198.97424 | 57.39  | 17.41 | 13.37 | 13.38 | 13.31 | 4.30E-12 | 3.38E-09 | 2.77E-09 | 5.31E-09 | 1.00E+00 | 1.00E+00 | 1.00E+00 |
| 198.98397 | 267.87 | 18.05 | 19.15 | 19.26 | 19.03 | 2.45E-05 | 3.81E-04 | 6.75E-05 | 2.99E-03 | 9.83E-01 | 9.72E-01 | 8.54E-01 |
| 198.99655 | 89.98  | 15.77 | 16.82 | 16.87 | 16.58 | 1.16E-04 | 7.02E-04 | 2.83E-04 | 1.79E-02 | 9.98E-01 | 8.42E-01 | 7.39E-01 |
| 199.02918 | 115.56 | 17.35 | 15.22 | 15.28 | 14.54 | 1.05E-21 | 2.03E-13 | 4.26E-13 | 6.98E-14 | 9.96E-01 | 6.99E-02 | 3.70E-02 |
| 199.0377  | 81.34  | 17.43 | 16.76 | 17.00 | 16.97 | 1.91E-04 | 7.74E-05 | 2.51E-02 | 1.87E-02 | 3.78E-01 | 5.28E-01 | 9.97E-01 |
| 199.05592 | 89.25  | 19.16 | 18.03 | 18.51 | 17.99 | 1.33E-17 | 8.96E-14 | 9.50E-06 | 8.18E-14 | 2.51E-03 | 9.91E-01 | 1.20E-03 |
| 199.06401 | 24.56  | 13.78 | 16.31 | 14.07 | 17.09 | 8.86E-19 | 5.68E-10 | 8.65E-01 | 8.17E-14 | 8.53E-08 | 2.01E-01 | 2.23E-12 |
| 199.07137 | 219.82 | 16.28 | 17.13 | 17.62 | 17.23 | 1.10E-17 | 2.36E-08 | 7.49E-14 | 1.19E-09 | 3.94E-03 | 9.06E-01 | 4.07E-02 |
| 199.07935 | 287.49 | 19.26 | 17.35 | 17.17 | 17.48 | 3.31E-12 | 4.75E-09 | 1.11E-10 | 1.32E-07 | 9.39E-01 | 9.71E-01 | 7.45E-01 |
| 199.08828 | 70.98  | 15.29 | 14.87 | 14.91 | 14.98 | 7.54E-01 | 7.62E-01 | 8.06E-01 | 8.97E-01 | 1.00E+00 | 9.95E-01 | 9.98E-01 |
| 199.09477 | 28.77  | 20.18 | 18.90 | 19.11 | 18.90 | 9.63E-11 | 6.19E-09 | 1.29E-06 | 1.46E-08 | 7.20E-01 | 1.00E+00 | 7.31E-01 |
| 199.0951  | 154.56 | 17.39 | 15.39 | 15.64 | 15.62 | 2.92E-22 | 7.27E-14 | 7.49E-14 | 7.78E-14 | 6.25E-01 | 7.10E-01 | 1.00E+00 |
| 199.10098 | 29.46  | 22.09 | 21.14 | 21.26 | 20.94 | 5.09E-07 | 5.20E-05 | 4.86E-04 | 1.21E-06 | 9.42E-01 | 8.03E-01 | 4.60E-01 |
| 199.10757 | 287.75 | 19.41 | 17.25 | 17.00 | 17.39 | 1.17E-19 | 1.05E-13 | 7.32E-14 | 3.44E-12 | 7.85E-01 | 9.52E-01 | 4.71E-01 |
| 199.10771 | 23.1   | 18.41 | 14.55 | 14.97 | 15.62 | 4.78E-71 | 3.65E-14 | 3.65E-14 | 3.65E-14 | 4.33E-02 | 2.18E-09 | 4.22E-04 |
| 199.11556 | 24.25  | 13.03 | 15.44 | 12.25 | 15.87 | 4.27E-17 | 2.76E-07 | 2.56E-01 | 3.10E-09 | 2.89E-11 | 7.74E-01 | 3.06E-13 |
| 199.11698 | 229.85 | 16.09 | 9.81  | 13.39 | 9.88  | 4.06E-34 | 3.65E-14 | 2.16E-07 | 3.67E-14 | 2.62E-11 | 9.99E-01 | 1.71E-10 |
| 199.13433 | 266.96 | 21.51 | 17.18 | 17.55 | 17.48 | 1.69E-45 | 3.65E-14 | 3.65E-14 | 3.65E-14 | 5.38E-01 | 7.02E-01 | 9.96E-01 |
| 199.14374 | 24.18  | 15.85 | 17.10 | 15.25 | 15.43 | 4.81E-19 | 1.20E-09 | 7.22E-03 | 1.17E-01 | 7.45E-14 | 9.71E-14 | 8.14E-01 |
| 199.14413 | 185.21 | 16.19 | 14.38 | 13.60 | 13.25 | 1.30E-24 | 1.80E-10 | 7.27E-14 | 5.85E-14 | 2.03E-02 | 3.43E-04 | 5.73E-01 |
| 199.14798 | 23.88  | 18.29 | 15.28 | 15.96 | 16.98 | 2.70E-33 | 3.65E-14 | 5.72E-14 | 4.96E-08 | 1.04E-02 | 5.27E-12 | 4.21E-05 |
| 199.16915 | 288.83 | 18.26 | 16.75 | 16.71 | 17.03 | 6.19E-10 | 4.77E-08 | 1.36E-08 | 1.95E-05 | 9.98E-01 | 7.26E-01 | 6.18E-01 |
| 199.16922 | 19.96  | 17.34 | 13.85 | 14.19 | 15.38 | 3.43E-64 | 3.65E-14 | 3.65E-14 | 3.70E-14 | 1.21E-01 | 7.26E-14 | 1.59E-11 |
| 199.18032 | 290.71 | 19.32 | 19.19 | 19.32 | 19.20 | 9.55E-01 | 9.71E-01 | 1.00E+00 | 9.80E-01 | 9.75E-01 | 1.00E+00 | 9.83E-01 |
| 199.1805  | 178.57 | 19.86 | 18.74 | 18.13 | 19.01 | 3.12E-06 | 3.17E-03 | 7.38E-07 | 5.09E-02 | 2.43E-01 | 8.54E-01 | 4.44E-02 |
| 199.46064 | 87.6   | 15.36 | 15.60 | 15.94 | 15.45 | 2.32E-01 | 8.49E-01 | 1.95E-01 | 9.91E-01 | 6.70E-01 | 9.64E-01 | 3.88E-01 |
| 199.47887 | 105.68 | 16.36 | 12.89 | 14.60 | 14.29 | 2.22E-11 | 2.30E-12 | 6.00E-04 | 6.59E-05 | 1.40E-03 | 1.87E-02 | 9.10E-01 |
| 199.50744 | 258.36 | 15.71 | 15.40 | 15.18 | 14.43 | 9.71E-06 | 5.77E-01 | 1.18E-01 | 3.02E-06 | 8.00E-01 | 1.03E-03 | 1.81E-02 |
| 199.51708 | 107.41 | 16.95 | 13.91 | 15.14 | 14.38 | 1.32E-13 | 5.27E-13 | 1.63E-05 | 1.86E-09 | 1.02E-02 | 6.57E-01 | 2.29E-01 |
| 199.53605 | 85.63  | 15.33 | 16.56 | 16.94 | 16.27 | 1.28E-08 | 1.59E-05 | 7.54E-09 | 2.28E-03 | 4.82E-01 | 7.09E-01 | 6.70E-02 |

|           |        |       |       |       |       |          |          |          |          |          |          |          |
|-----------|--------|-------|-------|-------|-------|----------|----------|----------|----------|----------|----------|----------|
| 199.60356 | 25.08  | 15.87 | 16.64 | 14.43 | 18.15 | 2.63E-20 | 9.51E-02 | 1.00E-04 | 7.74E-10 | 2.76E-09 | 1.25E-04 | 6.61E-14 |
| 199.61226 | 25.22  | 15.05 | 12.35 | 15.54 | 15.54 | 1.29E-17 | 8.72E-12 | 5.12E-01 | 5.46E-01 | 8.14E-14 | 1.13E-13 | 1.00E+00 |
| 199.61779 | 23.88  | 14.11 | 14.84 | 15.30 | 14.33 | 5.44E-02 | 3.89E-01 | 4.67E-02 | 9.64E-01 | 7.60E-01 | 7.31E-01 | 1.92E-01 |
| 199.63658 | 21     | 15.69 | 15.32 | 15.31 | 15.75 | 2.09E-01 | 4.65E-01 | 4.45E-01 | 9.97E-01 | 1.00E+00 | 3.95E-01 | 3.77E-01 |
| 199.96106 | 262.34 | 17.52 | 16.33 | 16.15 | 16.76 | 5.87E-06 | 1.64E-04 | 8.29E-06 | 3.99E-02 | 9.25E-01 | 4.71E-01 | 1.67E-01 |
| 199.99004 | 94.81  | 19.53 | 16.21 | 15.87 | 16.61 | 4.62E-62 | 3.65E-14 | 3.65E-14 | 3.65E-14 | 2.05E-01 | 1.22E-01 | 2.74E-04 |
| 199.9965  | 300    | 16.24 | 13.83 | 12.30 | 15.09 | 1.96E-24 | 6.89E-11 | 4.07E-14 | 5.74E-03 | 8.08E-05 | 2.66E-03 | 7.83E-13 |
| 200.00628 | 91.96  | 13.43 | 15.36 | 15.23 | 15.11 | 3.12E-05 | 1.41E-04 | 3.88E-04 | 1.74E-03 | 9.92E-01 | 9.54E-01 | 9.94E-01 |
| 200.03182 | 68.35  | 14.27 | 13.75 | 15.58 | 13.85 | 3.44E-05 | 5.59E-01 | 6.08E-03 | 7.37E-01 | 7.27E-05 | 9.95E-01 | 3.15E-04 |
| 200.03598 | 48.24  | 18.74 | 19.33 | 19.51 | 19.15 | 2.63E-05 | 1.58E-03 | 1.54E-05 | 6.72E-02 | 7.13E-01 | 6.95E-01 | 1.45E-01 |
| 200.0438  | 82.17  | 22.38 | 20.04 | 20.69 | 20.48 | 1.27E-34 | 3.65E-14 | 6.85E-14 | 4.90E-14 | 7.76E-04 | 4.99E-02 | 6.41E-01 |
| 200.06835 | 47.3   | 23.50 | 24.10 | 24.45 | 24.25 | 1.80E-22 | 2.34E-10 | 5.72E-14 | 9.78E-14 | 7.92E-04 | 3.62E-01 | 1.45E-01 |
| 200.07575 | 96.11  | 17.32 | 18.51 | 18.58 | 18.36 | 2.92E-11 | 1.01E-08 | 8.44E-10 | 1.26E-06 | 9.82E-01 | 8.78E-01 | 6.80E-01 |
| 200.10115 | 296.37 | 17.72 | 18.48 | 18.46 | 18.38 | 1.69E-01 | 2.17E-01 | 2.38E-01 | 3.67E-01 | 1.00E+00 | 9.94E-01 | 9.98E-01 |
| 200.10125 | 177.75 | 19.62 | 18.54 | 18.91 | 18.80 | 1.44E-06 | 9.09E-07 | 2.01E-03 | 4.95E-04 | 2.82E-01 | 6.00E-01 | 9.61E-01 |
| 200.10173 | 27.24  | 18.75 | 17.32 | 17.54 | 17.48 | 4.26E-28 | 4.07E-14 | 7.29E-14 | 7.27E-14 | 2.86E-01 | 6.21E-01 | 9.56E-01 |
| 200.11102 | 199.05 | 16.25 | 12.64 | 12.67 | 13.04 | 3.19E-11 | 4.06E-09 | 4.29E-09 | 4.26E-07 | 1.00E+00 | 9.01E-01 | 9.23E-01 |
| 200.12266 | 34.94  | 14.82 | 16.26 | 15.40 | 16.33 | 8.63E-04 | 3.73E-03 | 4.96E-01 | 2.88E-03 | 1.88E-01 | 9.99E-01 | 1.50E-01 |
| 200.12799 | 291.74 | 17.92 | 17.47 | 17.24 | 16.88 | 1.10E-02 | 4.63E-01 | 1.16E-01 | 5.96E-03 | 8.82E-01 | 2.62E-01 | 6.75E-01 |
| 200.16448 | 176.09 | 17.17 | 15.01 | 14.80 | 15.46 | 9.73E-38 | 3.65E-14 | 3.65E-14 | 7.09E-14 | 5.55E-01 | 4.97E-02 | 7.50E-04 |
| 200.18386 | 151.95 | 17.07 | 15.53 | 15.74 | 15.63 | 6.84E-20 | 7.57E-14 | 2.74E-13 | 9.89E-14 | 5.91E-01 | 9.27E-01 | 9.30E-01 |
| 200.20089 | 161.96 | 17.42 | 15.26 | 14.84 | 16.22 | 8.83E-28 | 7.35E-14 | 3.72E-14 | 4.76E-07 | 2.15E-01 | 1.58E-04 | 1.53E-08 |
| 200.54591 | 83.05  | 19.49 | 16.99 | 17.36 | 17.32 | 9.32E-37 | 3.65E-14 | 3.74E-14 | 3.85E-14 | 1.66E-01 | 2.70E-01 | 9.97E-01 |
| 200.57043 | 72.3   | 16.36 | 13.50 | 15.08 | 14.40 | 4.90E-14 | 9.08E-14 | 9.01E-04 | 2.18E-07 | 4.13E-05 | 6.00E-02 | 2.10E-01 |
| 200.57791 | 89.86  | 16.00 | 15.95 | 16.34 | 15.24 | 6.12E-03 | 9.98E-01 | 6.64E-01 | 5.97E-02 | 5.85E-01 | 1.05E-01 | 2.72E-03 |
| 200.61147 | 24.51  | 16.80 | 19.35 | 17.85 | 20.55 | 3.35E-35 | 7.41E-14 | 1.66E-04 | 3.65E-14 | 9.67E-08 | 5.43E-05 | 7.21E-14 |
| 200.85225 | 44.84  | 15.23 | 13.73 | 13.81 | 14.27 | 4.16E-17 | 7.96E-14 | 1.50E-13 | 9.13E-07 | 9.62E-01 | 1.80E-02 | 6.17E-02 |
| 200.85911 | 49.81  | 16.48 | 15.60 | 15.53 | 16.26 | 6.28E-05 | 1.34E-03 | 4.07E-04 | 7.94E-01 | 9.93E-01 | 4.39E-02 | 1.99E-02 |
| 200.97345 | 272.79 | 21.66 | 21.92 | 21.77 | 21.41 | 1.83E-01 | 6.53E-01 | 9.63E-01 | 6.79E-01 | 9.09E-01 | 1.33E-01 | 4.12E-01 |
| 200.99284 | 88.63  | 16.25 | 18.90 | 18.99 | 17.75 | 2.48E-20 | 7.27E-14 | 7.56E-14 | 5.05E-06 | 9.89E-01 | 1.20E-03 | 3.25E-04 |
| 201.03772 | 81.75  | 13.63 | 15.46 | 16.14 | 14.26 | 6.77E-04 | 2.67E-02 | 7.43E-04 | 7.80E-01 | 7.41E-01 | 3.02E-01 | 3.23E-02 |
| 201.04531 | 79.59  | 17.15 | 12.52 | 13.33 | 13.96 | 1.43E-40 | 3.65E-14 | 3.65E-14 | 6.45E-14 | 3.22E-02 | 2.19E-05 | 1.56E-01 |
| 201.05366 | 74.65  | 19.14 | 19.08 | 19.56 | 19.23 | 3.69E-03 | 9.69E-01 | 1.20E-02 | 9.18E-01 | 3.96E-03 | 7.19E-01 | 1.04E-01 |
| 201.06565 | 43.67  | 14.46 | 15.58 | 16.07 | 14.48 | 2.88E-03 | 1.19E-01 | 7.78E-03 | 1.00E+00 | 7.79E-01 | 1.71E-01 | 1.59E-02 |
| 201.07178 | 45.45  | 19.66 | 20.03 | 20.54 | 20.16 | 7.67E-17 | 4.78E-04 | 7.23E-14 | 1.68E-06 | 6.73E-07 | 5.33E-01 | 5.16E-04 |
| 201.07576 | 227.72 | 16.43 | 9.58  | 10.33 | 13.64 | 3.92E-46 | 3.65E-14 | 3.65E-14 | 6.74E-10 | 2.65E-01 | 7.46E-14 | 1.07E-12 |
| 201.08691 | 188.66 | 18.04 | 14.85 | 14.94 | 15.47 | 7.14E-43 | 3.65E-14 | 3.65E-14 | 3.76E-14 | 9.72E-01 | 2.20E-02 | 6.47E-02 |
| 201.09495 | 290.53 | 18.73 | 18.16 | 17.92 | 18.50 | 1.77E-01 | 4.63E-01 | 1.55E-01 | 9.41E-01 | 9.29E-01 | 8.41E-01 | 4.83E-01 |
| 201.10349 | 24.77  | 13.75 | 14.32 | 11.89 | 16.30 | 7.39E-12 | 7.04E-01 | 2.87E-03 | 2.70E-05 | 7.60E-05 | 2.74E-03 | 7.59E-13 |
| 201.11208 | 171.39 | 17.72 | 16.09 | 15.78 | 16.50 | 1.47E-25 | 7.51E-14 | 4.16E-14 | 9.14E-11 | 2.63E-01 | 9.24E-02 | 2.85E-04 |
| 201.11271 | 21.71  | 16.82 | 16.63 | 15.02 | 18.27 | 1.10E-27 | 8.40E-01 | 1.19E-12 | 3.39E-08 | 6.66E-10 | 1.27E-09 | 3.65E-14 |
| 201.12345 | 155.14 | 17.64 | 14.72 | 15.05 | 15.83 | 5.89E-42 | 3.65E-14 | 3.65E-14 | 7.49E-14 | 2.78E-01 | 1.15E-07 | 2.98E-04 |
| 201.12734 | 24.2   | 16.91 | 13.59 | 13.74 | 15.64 | 5.80E-31 | 3.74E-14 | 4.12E-14 | 5.14E-05 | 9.47E-01 | 6.95E-11 | 1.08E-09 |
| 201.12737 | 170.29 | 16.53 | 13.93 | 13.13 | 14.81 | 1.45E-32 | 6.43E-14 | 3.65E-14 | 2.62E-10 | 8.37E-03 | 3.66E-03 | 1.69E-09 |
| 201.13053 | 23.3   | 15.83 | 17.64 | 19.72 | 18.11 | 4.55E-38 | 4.66E-12 | 3.65E-14 | 7.37E-14 | 8.23E-14 | 2.30E-01 | 3.51E-09 |
| 201.15966 | 25.64  | 10.52 | 16.91 | 11.13 | 6.90  | 3.06E-50 | 3.65E-14 | 5.48E-01 | 5.32E-12 | 3.85E-14 | 3.65E-14 | 8.14E-14 |
| 201.15978 | 158.04 | 14.07 | 17.54 | 14.92 | 9.46  | 3.35E-40 | 1.54E-12 | 2.16E-01 | 7.25E-14 | 1.84E-07 | 3.65E-14 | 4.23E-14 |
| 201.16366 | 23.99  | 18.78 | 16.19 | 17.02 | 17.70 | 1.04E-28 | 3.65E-14 | 7.43E-14 | 1.23E-06 | 2.82E-04 | 3.24E-11 | 5.94E-03 |
| 201.1638  | 141.57 | 17.55 | 15.47 | 15.58 | 16.36 | 3.46E-26 | 5.07E-14 | 6.52E-14 | 9.69E-09 | 9.36E-01 | 4.65E-05 | 4.22E-04 |
| 201.4978  | 107.85 | 17.38 | 15.40 | 14.63 | 15.52 | 3.14E-30 | 7.32E-14 | 3.65E-14 | 7.38E-14 | 1.83E-03 | 9.45E-01 | 3.07E-04 |
| 201.5097  | 254.24 | 15.32 | 16.21 | 16.27 | 14.58 | 1.11E-05 | 5.99E-02 | 3.69E-02 | 1.77E-01 | 9.99E-01 | 1.19E-04 | 5.35E-05 |
| 201.54552 | 94.79  | 20.95 | 19.59 | 20.47 | 19.88 | 4.54E-11 | 1.36E-10 | 6.36E-02 | 9.51E-07 | 7.31E-05 | 4.95E-01 | 1.89E-02 |
| 201.61928 | 24.36  | 14.84 | 16.50 | 14.28 | 17.03 | 7.79E-12 | 1.75E-04 | 4.58E-01 | 6.58E-07 | 4.14E-07 | 5.67E-01 | 7.62E-10 |
| 201.63213 | 23.99  | 15.34 | 15.04 | 17.33 | 16.37 | 2.34E-18 | 6.17E-01 | 1.56E-13 | 2.88E-04 | 7.29E-14 | 3.26E-06 | 1.28E-03 |
| 201.92407 | 276.63 | 17.38 | 16.28 | 16.87 | 16.12 | 3.75E-03 | 1.74E-02 | 5.12E-01 | 5.85E-03 | 4.03E-01 | 9.77E-01 | 2.16E-01 |
| 201.93369 | 56.93  | 25.19 | 23.48 | 24.39 | 23.49 | 1.27E-21 | 7.45E-14 | 3.97E-05 | 7.44E-14 | 4.30E-06 | 1.00E+00 | 1.21E-05 |
| 201.96418 | 97.31  | 17.16 | 20.20 | 17.76 | 19.72 | 5.16E-19 | 7.54E-14 | 2.88E-01 | 1.91E-11 | 1.33E-10 | 5.44E-01 | 5.15E-07 |
| 201.97659 | 259.09 | 16.69 | 15.47 | 15.62 | 15.90 | 1.12E-07 | 2.68E-07 | 7.06E-06 | 2.74E-03 | 8.96E-01 | 2.22E-01 | 5.93E-01 |
| 201.97707 | 108.04 | 18.07 | 16.03 | 16.95 | 16.11 | 3.42E-20 | 7.58E-14 | 1.35E-06 | 7.41E-14 | 2.15E-04 | 9.87E-01 | 1.19E-03 |
| 201.98543 | 301.84 | 17.19 | 16.56 | 15.62 | 17.15 | 1.09E-11 | 2.74E-02 | 1.01E-10 | 9.99E-01 | 3.08E-04 | 6.06E-02 | 2.31E-09 |
| 201.99059 | 43.71  | 18.63 | 15.56 | 15.52 | 16.55 | 4.51E-46 | 3.65E-14 | 3.65E-14 | 6.54E-14 | 9.96E-01 | 6.73E-06 | 2.01E-06 |
| 202.01011 | 51.82  | 18.21 | 17.95 | 18.17 | 18.05 | 1.31E-01 | 1.27E-01 | 9.90E-01 | 5.84E-01 | 2.54E-01 | 8.32E-01 | 7.78E-01 |
| 202.0104  | 233.56 | 16.41 | 14.86 | 15.24 | 15.38 | 3.16E-17 | 7.37E-14 | 7.19E-11 | 3.30E-08 | 1.16E-01 | 1.68E-02 | 8.45E-01 |
| 202.01978 | 253.79 | 17.28 | 13.62 | 15.97 | 16.21 | 1.26E-18 | 7.38E-14 | 1.60E-03 | 1.99E-02 | 5.07E-09 | 5.06E-10 | 9.24E-01 |
| 202.04018 | 66.61  | 16.99 | 14.42 | 14.26 | 14.48 | 4.58E-06 | 1.30E-04 | 3.18E-05 | 3.00E-04 | 9.92E-01 | 1.00E+00 | 9.84E-01 |
| 202.04713 | 88.36  | 18.02 | 16.22 | 16.89 | 16.56 | 1.31E-17 | 7.49E-14 | 6.28E-08 | 1.29E-11 | 3.94E-03 | 3.42E-01 | 3.44E-01 |
| 202.06652 | 45.52  | 19.60 | 19.98 | 20.48 | 20.11 | 1.68E-16 | 2.94E-04 | 7.46E-14 | 1.16E-06 | 2.15E-06 | 5.61E-01 | 1.05E-03 |
| 202.07087 | 287.51 | 20.15 | 18.42 | 18.23 | 18.73 | 2.58E-09 | 4.56E-07 | 1.33E-08 | 8.38E-05 | 9.31E-01 | 7.77E-01 | 4.12E-01 |

|           |        |       |       |       |       |          |          |          |          |          |          |          |
|-----------|--------|-------|-------|-------|-------|----------|----------|----------|----------|----------|----------|----------|
| 202.07797 | 156.68 | 16.96 | 14.99 | 15.69 | 15.52 | 1.40E-26 | 3.72E-14 | 3.22E-13 | 7.52E-14 | 1.23E-04 | 8.72E-03 | 7.37E-01 |
| 202.08569 | 24.96  | 13.81 | 13.85 | 9.34  | 11.00 | 2.48E-13 | 1.00E+00 | 6.05E-11 | 1.12E-04 | 1.75E-10 | 1.56E-04 | 6.14E-02 |
| 202.08631 | 197.46 | 15.97 | 11.84 | 14.07 | 13.53 | 5.74E-13 | 1.28E-13 | 8.47E-04 | 1.88E-05 | 9.91E-05 | 7.66E-03 | 7.31E-01 |
| 202.08966 | 171.67 | 17.10 | 14.17 | 14.15 | 14.69 | 3.42E-50 | 3.65E-14 | 3.65E-14 | 3.65E-14 | 1.00E+00 | 1.98E-02 | 1.36E-02 |
| 202.09785 | 195.45 | 16.77 | 13.73 | 13.02 | 14.61 | 8.63E-43 | 3.65E-14 | 3.65E-14 | 7.62E-14 | 9.73E-03 | 1.43E-03 | 4.77E-10 |
| 202.10737 | 148.41 | 22.16 | 20.66 | 20.59 | 20.83 | 1.33E-03 | 5.68E-03 | 3.08E-03 | 2.31E-02 | 9.99E-01 | 9.84E-01 | 9.59E-01 |
| 202.11128 | 24.61  | 8.43  | 15.61 | 10.76 | 15.39 | 2.54E-26 | 6.36E-14 | 2.57E-03 | 7.36E-14 | 7.15E-11 | 9.90E-01 | 1.20E-09 |
| 202.11719 | 198.66 | 17.25 | 14.30 | 14.71 | 14.78 | 2.29E-33 | 3.65E-14 | 4.30E-14 | 6.03E-14 | 2.47E-01 | 1.60E-01 | 9.92E-01 |
| 202.13819 | 23.27  | 13.90 | 13.19 | 15.99 | 14.33 | 4.59E-11 | 2.27E-01 | 2.65E-07 | 6.73E-01 | 2.31E-11 | 2.15E-02 | 1.86E-04 |
| 202.1437  | 282.74 | 18.91 | 16.75 | 16.59 | 16.85 | 1.13E-15 | 1.22E-11 | 3.33E-13 | 3.18E-10 | 9.51E-01 | 9.85E-01 | 8.20E-01 |
| 202.16702 | 22.87  | 16.02 | 10.59 | 12.72 | 13.66 | 2.54E-28 | 3.65E-14 | 1.92E-13 | 2.76E-07 | 3.70E-06 | 7.47E-11 | 1.25E-01 |
| 202.18013 | 21.58  | 16.03 | 12.18 | 12.73 | 13.83 | 2.65E-53 | 3.65E-14 | 3.65E-14 | 5.70E-14 | 3.27E-02 | 4.23E-13 | 9.41E-07 |
| 202.18017 | 168.35 | 16.24 | 14.16 | 14.43 | 14.92 | 1.39E-17 | 7.44E-14 | 4.52E-13 | 3.24E-07 | 6.44E-01 | 9.16E-03 | 1.70E-01 |
| 202.21652 | 23.2   | 14.41 | 15.00 | 11.99 | 12.19 | 1.44E-09 | 6.64E-01 | 2.26E-05 | 2.28E-04 | 2.28E-07 | 3.48E-06 | 9.83E-01 |
| 202.3717  | 234.37 | 18.42 | 19.98 | 21.47 | 19.64 | 1.23E-14 | 4.99E-05 | 7.55E-14 | 3.46E-03 | 1.97E-04 | 7.82E-01 | 4.80E-06 |
| 202.5056  | 99.26  | 16.17 | 14.81 | 14.09 | 14.66 | 2.46E-08 | 3.92E-04 | 1.05E-08 | 1.05E-04 | 1.53E-01 | 9.76E-01 | 3.59E-01 |
| 202.51196 | 247.32 | 16.80 | 17.65 | 17.59 | 17.06 | 6.65E-02 | 9.92E-02 | 1.35E-01 | 8.94E-01 | 9.99E-01 | 4.43E-01 | 5.29E-01 |
| 202.51757 | 255.82 | 17.46 | 19.00 | 17.75 | 17.54 | 1.59E-03 | 2.01E-03 | 9.03E-01 | 9.97E-01 | 2.26E-02 | 7.72E-03 | 9.70E-01 |
| 202.52156 | 141.57 | 16.01 | 14.88 | 14.76 | 14.99 | 1.23E-11 | 1.20E-08 | 2.32E-10 | 6.21E-07 | 9.25E-01 | 9.39E-01 | 6.36E-01 |
| 202.53077 | 32.58  | 15.25 | 13.95 | 16.85 | 16.62 | 8.58E-15 | 1.49E-03 | 4.12E-05 | 1.04E-03 | 3.35E-13 | 5.77E-11 | 9.25E-01 |
| 202.55257 | 79.36  | 18.05 | 17.21 | 17.60 | 17.19 | 8.86E-03 | 1.73E-02 | 3.77E-01 | 1.76E-02 | 5.34E-01 | 1.00E+00 | 5.12E-01 |
| 202.57125 | 81.17  | 16.49 | 17.43 | 16.88 | 17.37 | 8.34E-05 | 2.36E-04 | 3.07E-01 | 9.63E-04 | 7.83E-02 | 9.95E-01 | 1.56E-01 |
| 202.62887 | 148.44 | 10.70 | 13.97 | 12.07 | 13.42 | 4.48E-07 | 7.36E-07 | 9.98E-02 | 8.55E-05 | 1.14E-02 | 8.23E-01 | 1.38E-01 |
| 202.70625 | 233.35 | 16.25 | 17.04 | 18.62 | 16.59 | 1.55E-10 | 9.56E-02 | 1.60E-10 | 7.71E-01 | 5.89E-05 | 5.88E-01 | 2.48E-07 |
| 202.88482 | 131.37 | 14.94 | 14.61 | 16.72 | 13.88 | 1.57E-14 | 7.36E-01 | 2.39E-07 | 7.66E-03 | 3.12E-09 | 1.36E-01 | 9.03E-04 |
| 202.89101 | 43.41  | 15.66 | 18.28 | 19.40 | 17.62 | 8.11E-49 | 3.65E-14 | 3.65E-14 | 7.28E-14 | 2.43E-07 | 7.77E-03 | 7.74E-14 |
| 202.9178  | 44.83  | 16.23 | 14.82 | 14.50 | 14.31 | 1.44E-16 | 5.65E-09 | 7.51E-13 | 9.70E-14 | 4.89E-01 | 1.35E-01 | 8.53E-01 |
| 202.93453 | 35.25  | 19.96 | 18.00 | 19.00 | 17.88 | 8.48E-25 | 7.03E-14 | 3.59E-06 | 6.63E-14 | 4.10E-06 | 9.28E-01 | 3.72E-07 |
| 202.97681 | 25.16  | 14.18 | 12.84 | 12.40 | 13.32 | 3.37E-08 | 4.31E-05 | 1.82E-08 | 2.16E-02 | 4.43E-01 | 4.20E-01 | 1.57E-02 |
| 202.98988 | 103.79 | 20.06 | 18.87 | 19.55 | 19.09 | 7.49E-12 | 2.02E-11 | 8.13E-03 | 9.27E-08 | 3.53E-04 | 5.85E-01 | 3.63E-02 |
| 203.00669 | 94.57  | 22.09 | 24.58 | 24.94 | 23.94 | 2.71E-16 | 5.59E-12 | 7.85E-14 | 6.44E-07 | 7.00E-01 | 2.59E-01 | 2.06E-02 |
| 203.01512 | 48.04  | 16.14 | 13.58 | 14.49 | 14.24 | 4.09E-08 | 2.25E-08 | 5.04E-04 | 8.36E-05 | 1.47E-01 | 4.41E-01 | 9.41E-01 |
| 203.01928 | 142.6  | 14.81 | 15.35 | 14.62 | 14.67 | 5.05E-01 | 7.14E-01 | 9.83E-01 | 9.93E-01 | 5.08E-01 | 5.88E-01 | 1.00E+00 |
| 203.02093 | 27.72  | 12.82 | 17.97 | 10.17 | 10.93 | 1.78E-60 | 3.65E-14 | 1.45E-12 | 1.18E-06 | 3.65E-14 | 3.65E-14 | 1.51E-01 |
| 203.03747 | 241.88 | 14.96 | 15.64 | 16.62 | 15.34 | 2.96E-04 | 2.94E-01 | 1.25E-04 | 7.69E-01 | 6.60E-02 | 8.85E-01 | 9.85E-03 |
| 203.05133 | 78.5   | 23.09 | 23.04 | 23.07 | 22.98 | 9.35E-01 | 9.88E-01 | 9.99E-01 | 9.26E-01 | 9.97E-01 | 9.91E-01 | 9.60E-01 |
| 203.05926 | 27.76  | 15.76 | 19.03 | 14.04 | 15.28 | 2.83E-57 | 3.65E-14 | 7.07E-13 | 1.45E-01 | 3.65E-14 | 3.65E-14 | 1.04E-06 |
| 203.06631 | 90.2   | 16.97 | 15.33 | 16.06 | 16.12 | 1.43E-14 | 7.45E-14 | 5.82E-06 | 5.27E-05 | 8.13E-04 | 4.09E-04 | 9.90E-01 |
| 203.06952 | 82.5   | 16.06 | 16.52 | 16.50 | 16.37 | 1.01E-01 | 1.19E-01 | 1.47E-01 | 4.78E-01 | 9.99E-01 | 8.93E-01 | 9.30E-01 |
| 203.08555 | 183.54 | 16.81 | 14.96 | 15.05 | 15.17 | 1.01E-19 | 7.53E-14 | 7.80E-14 | 9.57E-13 | 9.78E-01 | 7.65E-01 | 9.36E-01 |
| 203.09277 | 292.61 | 18.25 | 18.09 | 17.96 | 18.20 | 8.65E-01 | 9.71E-01 | 8.49E-01 | 9.99E-01 | 9.85E-01 | 9.92E-01 | 9.24E-01 |
| 203.09323 | 26.5   | 19.05 | 17.25 | 17.26 | 16.63 | 2.90E-32 | 7.14E-14 | 7.05E-14 | 3.65E-14 | 1.00E+00 | 4.77E-03 | 3.27E-03 |
| 203.10244 | 162.78 | 17.47 | 15.33 | 16.29 | 16.00 | 2.03E-17 | 7.41E-14 | 9.43E-07 | 2.79E-09 | 1.75E-04 | 2.33E-02 | 5.86E-01 |
| 203.10669 | 173.67 | 16.92 | 14.94 | 15.19 | 15.51 | 1.47E-29 | 3.70E-14 | 5.50E-14 | 7.78E-14 | 4.34E-01 | 4.02E-03 | 1.97E-01 |
| 203.11063 | 283.9  | 18.77 | 16.53 | 16.29 | 16.90 | 3.91E-26 | 7.26E-14 | 4.56E-14 | 1.16E-13 | 6.84E-01 | 3.85E-01 | 3.84E-02 |
| 203.13905 | 45.16  | 18.68 | 19.06 | 18.97 | 18.96 | 6.79E-02 | 5.71E-02 | 2.06E-01 | 2.73E-01 | 9.38E-01 | 9.17E-01 | 1.00E+00 |
| 203.14302 | 20.06  | 17.03 | 13.71 | 14.25 | 15.28 | 1.95E-58 | 3.65E-14 | 3.65E-14 | 5.65E-14 | 3.70E-03 | 7.34E-14 | 5.04E-09 |
| 203.14307 | 164.42 | 17.83 | 15.70 | 15.94 | 16.17 | 5.82E-24 | 6.45E-14 | 7.38E-14 | 1.72E-13 | 6.29E-01 | 1.19E-01 | 7.04E-01 |
| 203.15027 | 64.38  | 21.34 | 21.97 | 21.81 | 21.41 | 8.85E-06 | 5.12E-05 | 3.91E-03 | 9.67E-01 | 6.76E-01 | 8.77E-04 | 2.91E-02 |
| 203.17928 | 23.96  | 18.21 | 16.46 | 16.70 | 17.37 | 3.01E-24 | 5.61E-14 | 7.42E-14 | 2.78E-06 | 4.50E-01 | 7.68E-07 | 3.95E-04 |
| 203.1793  | 282.01 | 17.85 | 16.08 | 16.02 | 16.33 | 2.56E-22 | 7.36E-14 | 7.54E-14 | 3.79E-13 | 9.88E-01 | 5.99E-01 | 3.98E-01 |
| 203.17942 | 162.7  | 18.27 | 15.77 | 15.78 | 16.44 | 3.77E-31 | 3.72E-14 | 3.72E-14 | 7.79E-14 | 1.00E+00 | 9.98E-03 | 1.01E-02 |
| 203.22288 | 284.72 | 19.27 | 20.73 | 18.97 | 20.23 | 1.68E-07 | 4.74E-05 | 7.67E-01 | 1.90E-02 | 1.01E-06 | 4.58E-01 | 1.12E-03 |
| 203.22302 | 19.49  | 18.44 | 16.74 | 15.01 | 18.41 | 6.37E-16 | 3.29E-04 | 1.20E-13 | 1.00E+00 | 3.78E-04 | 1.04E-03 | 1.44E-12 |
| 203.51129 | 184.73 | 11.39 | 12.15 | 13.04 | 12.05 | 5.24E-02 | 5.68E-01 | 2.61E-02 | 6.90E-01 | 4.56E-01 | 9.99E-01 | 3.85E-01 |
| 203.55053 | 91.84  | 17.88 | 18.35 | 18.00 | 18.42 | 3.73E-02 | 1.23E-01 | 9.41E-01 | 6.60E-02 | 3.75E-01 | 9.89E-01 | 2.37E-01 |
| 203.55598 | 79.59  | 18.02 | 17.67 | 17.75 | 17.69 | 5.49E-01 | 5.70E-01 | 7.46E-01 | 6.44E-01 | 9.92E-01 | 1.00E+00 | 9.97E-01 |
| 203.56341 | 85.03  | 17.56 | 19.50 | 19.63 | 19.09 | 7.36E-20 | 7.36E-14 | 7.53E-14 | 4.93E-10 | 9.47E-01 | 2.86E-01 | 9.46E-02 |
| 203.60611 | 24.31  | 10.44 | 13.47 | 11.38 | 16.27 | 6.98E-17 | 1.21E-05 | 4.25E-01 | 7.37E-14 | 6.38E-03 | 1.70E-04 | 8.49E-12 |
| 203.921   | 281.43 | 16.24 | 15.39 | 15.31 | 15.48 | 1.95E-02 | 5.46E-02 | 2.56E-02 | 1.19E-01 | 9.95E-01 | 9.94E-01 | 9.59E-01 |
| 203.92107 | 152.73 | 15.92 | 14.19 | 15.22 | 14.88 | 9.29E-03 | 4.12E-03 | 5.00E-01 | 1.90E-01 | 1.97E-01 | 5.70E-01 | 9.21E-01 |
| 203.93061 | 60.79  | 22.35 | 20.66 | 21.69 | 20.28 | 2.74E-18 | 4.01E-12 | 1.58E-02 | 7.53E-14 | 5.06E-05 | 3.65E-01 | 3.02E-08 |
| 203.93771 | 51.1   | 17.63 | 14.77 | 15.40 | 14.87 | 3.95E-13 | 2.60E-11 | 1.69E-07 | 3.20E-10 | 3.88E-01 | 9.96E-01 | 5.55E-01 |
| 203.97339 | 93.8   | 18.97 | 16.34 | 16.50 | 16.54 | 2.46E-18 | 8.09E-14 | 1.67E-13 | 1.39E-12 | 9.60E-01 | 9.27E-01 | 9.99E-01 |
| 203.99064 | 87.86  | 13.10 | 16.17 | 16.74 | 15.34 | 6.74E-12 | 1.78E-08 | 1.70E-11 | 1.03E-04 | 6.79E-01 | 3.89E-01 | 3.83E-02 |
| 204.0042  | 88.67  | 13.32 | 13.98 | 16.12 | 14.51 | 4.62E-07 | 5.34E-01 | 1.61E-07 | 8.79E-02 | 1.75E-04 | 7.40E-01 | 1.05E-02 |
| 204.00889 | 84.02  | 18.77 | 21.64 | 22.12 | 21.25 | 6.13E-30 | 6.18E-14 | 3.67E-14 | 7.34E-14 | 2.97E-01 | 4.92E-01 | 1.03E-02 |
| 204.01792 | 88.12  | 17.45 | 15.24 | 17.09 | 15.54 | 2.71E-28 | 5.10E-14 | 2.68E-01 | 7.25E-14 | 7.49E-14 | 4.63E-01 | 6.10E-12 |

|           |        |       |       |       |       |          |          |          |          |          |          |          |
|-----------|--------|-------|-------|-------|-------|----------|----------|----------|----------|----------|----------|----------|
| 204.06433 | 74.55  | 15.71 | 11.87 | 13.73 | 13.72 | 1.43E-08 | 1.46E-09 | 3.55E-03 | 5.11E-03 | 1.06E-02 | 1.51E-02 | 1.00E+00 |
| 204.06553 | 223.29 | 15.47 | 8.80  | 10.06 | 11.38 | 4.21E-27 | 3.74E-14 | 7.44E-14 | 2.45E-11 | 1.06E-01 | 6.62E-05 | 9.90E-02 |
| 204.08652 | 266.51 | 21.94 | 20.52 | 21.35 | 20.99 | 2.43E-05 | 8.88E-06 | 1.62E-01 | 7.72E-03 | 2.71E-02 | 4.15E-01 | 6.32E-01 |
| 204.09627 | 189.45 | 16.56 | 11.70 | 12.29 | 12.67 | 8.70E-68 | 3.65E-14 | 3.65E-14 | 3.65E-14 | 2.69E-02 | 6.72E-05 | 2.85E-01 |
| 204.09803 | 64.14  | 16.86 | 16.10 | 16.70 | 16.67 | 1.60E-02 | 1.08E-02 | 9.13E-01 | 8.73E-01 | 7.69E-02 | 1.22E-01 | 9.99E-01 |
| 204.10503 | 292.75 | 19.33 | 17.28 | 17.76 | 17.97 | 1.87E-06 | 1.36E-06 | 2.90E-04 | 3.85E-03 | 6.18E-01 | 3.21E-01 | 9.49E-01 |
| 204.10516 | 171    | 20.21 | 17.99 | 18.54 | 18.58 | 5.16E-22 | 6.43E-14 | 1.92E-13 | 2.29E-12 | 4.88E-02 | 3.81E-02 | 9.98E-01 |
| 204.11409 | 203.01 | 15.17 | 7.46  | 7.50  | 8.91  | 4.05E-44 | 3.65E-14 | 3.65E-14 | 3.72E-14 | 1.00E+00 | 2.76E-02 | 3.23E-02 |
| 204.11847 | 32.27  | 18.09 | 18.97 | 18.64 | 17.62 | 2.31E-04 | 2.17E-02 | 2.64E-01 | 4.46E-01 | 7.15E-01 | 2.48E-04 | 9.12E-03 |
| 204.12295 | 53.88  | 29.03 | 30.45 | 29.42 | 29.50 | 5.95E-33 | 3.65E-14 | 3.69E-04 | 2.63E-05 | 7.06E-14 | 7.34E-14 | 8.75E-01 |
| 204.13242 | 49.95  | 17.00 | 12.29 | 15.41 | 13.56 | 1.40E-11 | 2.02E-11 | 6.08E-02 | 2.22E-06 | 2.01E-05 | 2.39E-01 | 3.22E-02 |
| 204.13825 | 168.3  | 16.94 | 12.83 | 14.45 | 14.94 | 4.25E-35 | 3.65E-14 | 7.61E-14 | 1.72E-11 | 5.01E-08 | 7.42E-12 | 2.97E-01 |
| 204.15932 | 200.29 | 16.61 | 9.29  | 9.52  | 10.86 | 2.57E-39 | 3.65E-14 | 3.65E-14 | 5.25E-14 | 9.68E-01 | 1.67E-02 | 5.37E-02 |
| 204.5243  | 91.16  | 14.57 | 15.34 | 15.21 | 14.86 | 5.09E-01 | 5.08E-01 | 6.45E-01 | 9.56E-01 | 9.96E-01 | 8.48E-01 | 9.31E-01 |
| 204.54111 | 26.87  | 16.67 | 18.72 | 16.00 | 15.90 | 2.18E-86 | 3.65E-14 | 7.14E-12 | 1.04E-13 | 3.65E-14 | 3.65E-14 | 6.82E-01 |
| 204.55551 | 94.07  | 19.92 | 19.64 | 20.04 | 19.33 | 6.83E-02 | 7.45E-01 | 9.67E-01 | 1.53E-01 | 4.82E-01 | 6.95E-01 | 6.33E-02 |
| 204.56207 | 85.24  | 15.95 | 16.15 | 16.25 | 16.11 | 4.52E-01 | 7.21E-01 | 3.74E-01 | 8.42E-01 | 9.51E-01 | 9.98E-01 | 8.92E-01 |
| 204.61393 | 23.99  | 13.70 | 14.85 | 12.29 | 16.23 | 1.76E-22 | 4.08E-03 | 1.72E-04 | 2.48E-11 | 1.13E-11 | 7.95E-04 | 5.34E-14 |
| 204.62451 | 24.48  | 14.00 | 16.67 | 13.25 | 16.47 | 8.18E-18 | 2.20E-09 | 2.43E-01 | 6.95E-08 | 1.79E-13 | 9.69E-01 | 6.40E-02 |
| 204.88876 | 271.44 | 19.26 | 12.14 | 12.48 | 14.21 | 3.09E-27 | 4.50E-14 | 5.65E-14 | 5.34E-13 | 9.48E-01 | 9.48E-03 | 4.11E-12 |
| 204.8889  | 37.95  | 16.59 | 15.10 | 17.03 | 16.12 | 4.52E-16 | 6.05E-11 | 1.51E-01 | 1.25E-01 | 7.41E-14 | 3.38E-05 | 2.73E-04 |
| 204.91846 | 255.3  | 18.10 | 15.45 | 15.11 | 16.21 | 4.69E-12 | 4.45E-09 | 2.73E-11 | 7.21E-05 | 8.57E-01 | 3.04E-01 | 5.77E-02 |
| 204.93358 | 23.22  | 16.80 | 13.85 | 13.63 | 15.09 | 2.15E-32 | 3.76E-14 | 3.65E-14 | 3.48E-10 | 8.12E-01 | 1.40E-05 | 1.74E-07 |
| 204.96658 | 111.59 | 16.40 | 15.10 | 15.42 | 15.29 | 1.14E-07 | 2.71E-07 | 1.52E-04 | 2.78E-05 | 5.16E-01 | 8.54E-01 | 9.51E-01 |
| 204.973   | 72.94  | 16.68 | 10.64 | 12.56 | 15.27 | 1.85E-30 | 3.65E-14 | 7.38E-14 | 1.66E-02 | 3.69E-04 | 7.64E-14 | 3.38E-07 |
| 204.98996 | 63.86  | 17.00 | 14.29 | 11.78 | 12.70 | 5.36E-13 | 4.30E-04 | 1.03E-12 | 1.25E-08 | 1.74E-03 | 1.15E-01 | 5.56E-01 |
| 204.99519 | 82.83  | 21.34 | 22.04 | 22.58 | 22.05 | 2.28E-04 | 5.78E-02 | 5.79E-05 | 6.34E-02 | 2.29E-01 | 1.00E+00 | 2.62E-01 |
| 205.00394 | 87.07  | 18.94 | 21.62 | 22.06 | 21.01 | 5.45E-21 | 7.75E-14 | 7.27E-14 | 1.91E-09 | 4.92E-01 | 2.45E-01 | 6.94E-03 |
| 205.01077 | 88.08  | 16.50 | 17.44 | 18.05 | 17.15 | 2.34E-09 | 2.79E-04 | 3.86E-10 | 3.02E-02 | 4.91E-02 | 6.12E-01 | 1.20E-03 |
| 205.02247 | 94.41  | 17.57 | 20.03 | 20.89 | 19.11 | 1.22E-25 | 7.61E-14 | 3.83E-14 | 9.23E-07 | 1.42E-02 | 9.38E-03 | 2.06E-08 |
| 205.03633 | 40.1   | 16.14 | 15.06 | 16.89 | 14.28 | 3.53E-15 | 1.79E-03 | 5.11E-02 | 1.88E-08 | 3.34E-08 | 5.82E-02 | 9.69E-04 |
| 205.04507 | 95.38  | 18.10 | 13.86 | 13.36 | 15.35 | 5.48E-24 | 7.48E-14 | 5.76E-14 | 1.84E-08 | 6.78E-01 | 7.14E-03 | 1.10E-04 |
| 205.05149 | 51.78  | 16.70 | 15.20 | 15.51 | 16.99 | 4.71E-08 | 3.49E-05 | 1.45E-03 | 8.18E-01 | 7.85E-01 | 2.33E-06 | 1.16E-04 |
| 205.05985 | 66.83  | 16.97 | 14.20 | 16.03 | 15.32 | 1.45E-09 | 3.79E-10 | 9.00E-02 | 5.11E-04 | 8.43E-05 | 4.60E-02 | 3.33E-01 |
| 205.06419 | 45.04  | 15.98 | 17.18 | 16.80 | 17.95 | 5.89E-07 | 2.13E-03 | 6.13E-02 | 1.40E-07 | 6.91E-01 | 1.25E-01 | 6.22E-03 |
| 205.06821 | 54.39  | 16.36 | 14.46 | 14.82 | 15.40 | 1.52E-06 | 1.65E-06 | 1.17E-04 | 4.56E-02 | 7.73E-01 | 6.85E-02 | 4.10E-01 |
| 205.07304 | 123.63 | 16.03 | 16.76 | 16.89 | 16.23 | 8.37E-08 | 4.73E-05 | 7.69E-07 | 6.06E-01 | 8.47E-01 | 1.09E-02 | 6.22E-04 |
| 205.08171 | 168.41 | 17.74 | 19.32 | 16.98 | 19.21 | 5.03E-10 | 2.07E-04 | 1.78E-01 | 9.10E-04 | 2.93E-08 | 9.94E-01 | 2.54E-07 |
| 205.08579 | 291.44 | 18.26 | 17.43 | 17.31 | 17.47 | 1.56E-02 | 5.55E-02 | 1.97E-02 | 9.13E-02 | 9.86E-01 | 9.99E-01 | 9.66E-01 |
| 205.09    | 272.25 | 18.90 | 17.02 | 16.86 | 17.39 | 2.26E-27 | 6.47E-14 | 4.12E-14 | 1.08E-13 | 8.00E-01 | 1.82E-01 | 1.95E-02 |
| 205.09721 | 43.9   | 24.31 | 23.55 | 23.83 | 23.85 | 2.41E-14 | 7.89E-14 | 3.51E-07 | 2.44E-06 | 1.26E-02 | 9.50E-03 | 9.97E-01 |
| 205.10845 | 182.32 | 22.04 | 20.55 | 20.38 | 20.17 | 8.81E-09 | 2.01E-05 | 1.14E-06 | 1.06E-07 | 9.47E-01 | 6.48E-01 | 9.18E-01 |
| 205.11923 | 269.64 | 16.59 | 17.70 | 18.63 | 17.02 | 5.37E-08 | 6.76E-03 | 3.23E-08 | 5.99E-01 | 3.93E-02 | 2.39E-01 | 6.12E-05 |
| 205.1262  | 49     | 25.52 | 27.02 | 26.28 | 26.12 | 1.69E-30 | 3.65E-14 | 3.17E-11 | 5.30E-07 | 4.68E-10 | 3.34E-13 | 4.55E-01 |
| 205.1547  | 66.91  | 15.58 | 16.60 | 15.78 | 16.57 | 1.76E-06 | 5.15E-05 | 8.07E-01 | 1.41E-04 | 2.39E-03 | 9.99E-01 | 4.86E-03 |
| 205.15855 | 21.71  | 16.86 | 13.02 | 14.19 | 14.46 | 5.31E-59 | 3.65E-14 | 3.65E-14 | 3.65E-14 | 5.51E-10 | 2.59E-13 | 4.04E-01 |
| 205.1586  | 269.01 | 17.47 | 15.88 | 15.59 | 16.15 | 9.00E-25 | 7.39E-14 | 4.74E-14 | 2.28E-12 | 3.21E-01 | 4.11E-01 | 7.79E-03 |
| 205.19485 | 23.61  | 16.92 | 13.67 | 14.04 | 15.06 | 6.55E-57 | 3.65E-14 | 3.65E-14 | 4.43E-14 | 9.98E-02 | 1.15E-13 | 1.69E-08 |
| 205.19497 | 288.91 | 17.10 | 15.62 | 15.87 | 15.73 | 2.11E-09 | 3.09E-08 | 4.61E-06 | 6.34E-07 | 7.39E-01 | 9.76E-01 | 9.40E-01 |
| 205.19503 | 172.33 | 17.40 | 15.09 | 14.54 | 15.76 | 1.39E-35 | 3.92E-14 | 3.65E-14 | 1.52E-13 | 2.93E-02 | 7.19E-03 | 4.81E-08 |
| 205.50686 | 90.49  | 18.22 | 16.03 | 16.48 | 16.53 | 1.08E-10 | 3.34E-10 | 5.12E-07 | 2.79E-06 | 5.17E-01 | 4.52E-01 | 9.99E-01 |
| 205.51326 | 116.65 | 16.27 | 14.54 | 13.71 | 14.25 | 7.82E-18 | 6.29E-09 | 7.48E-14 | 4.06E-11 | 1.51E-02 | 7.44E-01 | 2.22E-01 |
| 205.5379  | 206.89 | 17.25 | 18.45 | 18.89 | 19.32 | 4.26E-10 | 4.62E-04 | 4.88E-07 | 7.59E-10 | 4.74E-01 | 3.26E-02 | 5.23E-01 |
| 205.54765 | 191.82 | 11.36 | 13.52 | 13.49 | 14.17 | 7.56E-07 | 2.09E-04 | 2.31E-04 | 1.36E-06 | 1.00E+00 | 6.31E-01 | 5.86E-01 |
| 205.56258 | 77.41  | 19.76 | 19.55 | 20.41 | 19.77 | 2.03E-02 | 8.75E-01 | 9.03E-02 | 1.00E+00 | 1.55E-02 | 8.86E-01 | 1.26E-01 |
| 205.5999  | 26.55  | 15.19 | 15.97 | 15.42 | 18.00 | 5.41E-15 | 8.02E-02 | 8.87E-01 | 1.03E-13 | 3.58E-01 | 7.57E-08 | 6.31E-12 |
| 205.60691 | 23.72  | 16.85 | 10.41 | 11.04 | 12.03 | 8.32E-69 | 3.65E-14 | 3.65E-14 | 3.65E-14 | 9.20E-02 | 1.66E-07 | 2.85E-03 |
| 205.63229 | 22.55  | 16.94 | 19.33 | 17.54 | 19.26 | 1.02E-38 | 3.65E-14 | 2.88E-03 | 3.65E-14 | 7.45E-14 | 9.79E-01 | 7.36E-14 |
| 205.91993 | 131.82 | 14.76 | 14.00 | 14.29 | 13.45 | 8.20E-02 | 4.21E-01 | 7.74E-01 | 5.14E-02 | 9.41E-01 | 7.18E-01 | 3.71E-01 |
| 205.92748 | 52.65  | 17.34 | 14.44 | 15.28 | 14.61 | 4.39E-18 | 7.43E-14 | 3.57E-09 | 1.43E-13 | 5.47E-02 | 9.60E-01 | 1.94E-01 |
| 205.93639 | 269.06 | 17.23 | 12.10 | 12.13 | 13.79 | 1.03E-30 | 3.74E-14 | 3.72E-14 | 3.89E-13 | 1.00E-03 | 1.01E-03 | 1.14E-03 |
| 205.96164 | 37.9   | 17.06 | 18.07 | 18.25 | 19.21 | 3.12E-18 | 8.62E-06 | 9.39E-08 | 7.35E-14 | 8.34E-01 | 2.50E-06 | 8.42E-05 |
| 205.99839 | 82.43  | 18.29 | 17.98 | 18.09 | 17.67 | 9.56E-03 | 3.12E-01 | 6.85E-01 | 4.25E-03 | 9.27E-01 | 3.39E-01 | 1.04E-01 |
| 206.00761 | 90.24  | 18.12 | 16.19 | 16.57 | 16.88 | 6.66E-28 | 3.70E-14 | 7.21E-14 | 1.18E-12 | 7.67E-02 | 1.89E-04 | 2.22E-01 |
| 206.02134 | 240.01 | 12.38 | 14.05 | 12.58 | 15.36 | 4.46E-07 | 1.35E-02 | 9.82E-01 | 1.79E-06 | 4.63E-02 | 1.15E-01 | 1.62E-05 |
| 206.02468 | 86.15  | 17.48 | 16.81 | 17.49 | 17.12 | 6.93E-04 | 2.01E-03 | 1.00E+00 | 2.41E-01 | 1.97E-03 | 3.78E-01 | 2.21E-01 |
| 206.03835 | 255.66 | 14.95 | 13.84 | 16.64 | 14.51 | 1.19E-04 | 2.63E-01 | 2.58E-02 | 8.94E-01 | 5.83E-05 | 7.26E-01 | 4.99E-03 |
| 206.04752 | 55.36  | 20.26 | 19.51 | 20.32 | 19.98 | 3.59E-07 | 4.42E-06 | 9.79E-01 | 2.33E-01 | 1.25E-06 | 1.69E-02 | 1.19E-01 |

|           |        |       |       |       |       |          |          |          |          |          |          |          |
|-----------|--------|-------|-------|-------|-------|----------|----------|----------|----------|----------|----------|----------|
| 206.0553  | 88.59  | 21.08 | 23.26 | 22.37 | 22.47 | 5.52E-31 | 3.65E-14 | 9.63E-14 | 7.75E-14 | 3.50E-07 | 1.45E-05 | 9.33E-01 |
| 206.06451 | 77.38  | 22.24 | 22.59 | 23.21 | 22.56 | 3.21E-02 | 7.11E-01 | 1.64E-02 | 7.75E-01 | 2.54E-01 | 1.00E+00 | 2.38E-01 |
| 206.08119 | 181.44 | 16.54 | 12.91 | 12.97 | 12.94 | 6.53E-20 | 7.65E-14 | 7.72E-14 | 9.15E-14 | 9.99E-01 | 1.00E+00 | 1.00E+00 |
| 206.08434 | 278.84 | 17.71 | 16.46 | 16.03 | 16.38 | 2.26E-17 | 5.47E-10 | 7.38E-14 | 1.18E-10 | 9.20E-02 | 9.74E-01 | 2.51E-01 |
| 206.08506 | 87.99  | 18.69 | 18.54 | 18.92 | 19.17 | 2.97E-02 | 8.88E-01 | 6.81E-01 | 1.18E-01 | 2.84E-01 | 2.50E-02 | 6.72E-01 |
| 206.09429 | 38.4   | 17.15 | 14.28 | 15.17 | 15.76 | 6.01E-24 | 4.14E-14 | 1.83E-13 | 4.95E-07 | 2.47E-03 | 1.68E-07 | 9.49E-02 |
| 206.10215 | 279.72 | 19.72 | 17.30 | 16.23 | 17.88 | 2.19E-08 | 1.02E-04 | 6.07E-09 | 7.26E-03 | 2.37E-01 | 7.51E-01 | 2.49E-01 |
| 206.1063  | 26.38  | 15.27 | 15.56 | 13.94 | 17.06 | 7.91E-14 | 8.33E-01 | 6.84E-04 | 4.04E-06 | 3.94E-05 | 2.65E-04 | 7.96E-14 |
| 206.11188 | 164.69 | 18.05 | 15.26 | 15.46 | 15.54 | 1.11E-36 | 3.65E-14 | 3.65E-14 | 3.83E-14 | 7.63E-01 | 5.54E-01 | 9.82E-01 |
| 206.11196 | 27.02  | 17.33 | 18.38 | 18.64 | 16.53 | 1.08E-10 | 3.42E-03 | 1.08E-04 | 5.20E-02 | 8.35E-01 | 1.54E-07 | 1.39E-09 |
| 206.1174  | 186.2  | 16.65 | 13.98 | 14.15 | 14.54 | 1.19E-32 | 3.65E-14 | 3.74E-14 | 7.54E-14 | 8.64E-01 | 5.04E-02 | 2.54E-01 |
| 206.12793 | 48.1   | 21.96 | 23.74 | 22.97 | 22.54 | 6.47E-34 | 3.65E-14 | 8.36E-14 | 2.49E-05 | 8.21E-09 | 7.37E-14 | 3.18E-03 |
| 206.13397 | 26.74  | 15.06 | 16.39 | 12.50 | 16.51 | 7.90E-16 | 2.54E-02 | 5.63E-07 | 1.51E-02 | 2.86E-13 | 9.95E-01 | 2.31E-13 |
| 206.1387  | 177.26 | 15.13 | 14.44 | 14.17 | 13.60 | 1.28E-03 | 2.55E-01 | 4.87E-02 | 5.13E-04 | 8.92E-01 | 1.47E-01 | 4.69E-01 |
| 206.14821 | 275.05 | 17.00 | 15.27 | 15.43 | 15.04 | 4.62E-19 | 1.30E-13 | 3.98E-12 | 7.36E-14 | 8.81E-01 | 7.38E-01 | 3.00E-01 |
| 206.15196 | 56.06  | 18.37 | 20.32 | 19.91 | 19.67 | 1.25E-09 | 1.49E-09 | 1.92E-06 | 1.44E-04 | 5.14E-01 | 1.60E-01 | 8.72E-01 |
| 206.15297 | 224.47 | 17.03 | 14.66 | 15.43 | 15.16 | 4.48E-17 | 7.56E-14 | 8.25E-09 | 9.50E-11 | 2.03E-02 | 2.54E-01 | 7.60E-01 |
| 206.43282 | 117.23 | 15.62 | 14.04 | 15.91 | 14.29 | 1.96E-06 | 4.92E-04 | 8.80E-01 | 6.68E-03 | 3.73E-05 | 9.30E-01 | 7.26E-04 |
| 206.52689 | 269.82 | 12.24 | 17.07 | 17.08 | 15.63 | 1.65E-20 | 7.56E-14 | 7.63E-14 | 4.60E-09 | 1.00E+00 | 4.14E-02 | 3.77E-02 |
| 206.53723 | 156.7  | 14.11 | 15.58 | 14.56 | 14.60 | 4.13E-03 | 1.73E-03 | 6.65E-01 | 6.30E-01 | 6.60E-02 | 9.98E-02 | 1.00E+00 |
| 206.54131 | 195.23 | 14.90 | 15.31 | 15.57 | 16.02 | 6.46E-04 | 3.87E-01 | 4.88E-02 | 2.58E-04 | 7.71E-01 | 5.68E-02 | 3.68E-01 |
| 206.56682 | 60.71  | 15.78 | 15.54 | 15.22 | 15.41 | 5.51E-01 | 9.28E-01 | 4.83E-01 | 7.92E-01 | 8.63E-01 | 9.89E-01 | 9.71E-01 |
| 206.5701  | 75.77  | 15.45 | 14.38 | 13.91 | 15.70 | 3.81E-04 | 9.49E-02 | 4.50E-03 | 9.54E-01 | 7.43E-01 | 3.68E-02 | 1.47E-03 |
| 206.64882 | 23.42  | 14.85 | 12.35 | 15.44 | 14.39 | 2.14E-14 | 2.28E-10 | 3.44E-01 | 5.99E-01 | 1.06E-13 | 1.20E-06 | 2.91E-02 |
| 206.65356 | 58.09  | 14.91 | 17.73 | 17.24 | 17.21 | 6.05E-08 | 1.97E-07 | 1.95E-05 | 5.30E-05 | 7.63E-01 | 7.47E-01 | 1.00E+00 |
| 206.88582 | 44.42  | 20.91 | 22.65 | 22.43 | 22.50 | 2.07E-27 | 4.70E-14 | 7.43E-14 | 7.32E-14 | 5.08E-01 | 8.08E-01 | 9.69E-01 |
| 206.89378 | 48.65  | 18.31 | 20.38 | 20.40 | 20.39 | 1.13E-13 | 2.49E-10 | 1.08E-10 | 5.67E-10 | 1.00E+00 | 1.00E+00 | 1.00E+00 |
| 206.94564 | 43.45  | 16.42 | 18.31 | 18.36 | 17.85 | 1.09E-38 | 3.65E-14 | 3.65E-14 | 7.16E-14 | 9.87E-01 | 6.20E-03 | 1.86E-03 |
| 206.99124 | 97.55  | 17.78 | 16.93 | 16.78 | 16.90 | 7.95E-06 | 5.01E-04 | 2.44E-05 | 4.46E-04 | 9.10E-01 | 9.99E-01 | 9.55E-01 |
| 207.00519 | 266.01 | 19.23 | 18.85 | 20.62 | 20.52 | 1.91E-10 | 5.36E-01 | 1.28E-05 | 1.16E-04 | 4.33E-08 | 6.36E-07 | 9.88E-01 |
| 207.01426 | 77.57  | 19.29 | 19.95 | 19.54 | 19.84 | 3.74E-02 | 3.76E-02 | 7.46E-01 | 1.33E-01 | 3.48E-01 | 9.72E-01 | 6.43E-01 |
| 207.01837 | 257.12 | 17.47 | 16.67 | 14.90 | 15.95 | 3.01E-15 | 3.27E-02 | 7.52E-14 | 4.46E-06 | 5.72E-08 | 9.15E-02 | 3.64E-03 |
| 207.02827 | 82.99  | 17.77 | 18.64 | 18.25 | 18.63 | 3.57E-08 | 3.26E-07 | 1.11E-02 | 1.11E-06 | 6.53E-02 | 1.00E+00 | 9.58E-02 |
| 207.0365  | 160.71 | 14.37 | 15.20 | 14.49 | 14.69 | 3.05E-01 | 2.71E-01 | 9.94E-01 | 9.04E-01 | 4.26E-01 | 7.21E-01 | 9.74E-01 |
| 207.05135 | 46.91  | 19.90 | 19.94 | 19.92 | 19.37 | 1.67E-02 | 9.97E-01 | 9.99E-01 | 4.05E-02 | 1.00E+00 | 3.00E-02 | 3.46E-02 |
| 207.06035 | 79.65  | 17.35 | 19.34 | 18.67 | 19.25 | 1.27E-20 | 7.49E-14 | 2.04E-09 | 7.47E-14 | 8.81E-03 | 9.73E-01 | 3.99E-02 |
| 207.06716 | 62.86  | 17.45 | 16.90 | 17.54 | 18.11 | 1.66E-03 | 2.09E-01 | 9.91E-01 | 1.18E-01 | 1.28E-01 | 4.85E-04 | 2.32E-01 |
| 207.07638 | 205.61 | 16.26 | 13.62 | 13.04 | 13.70 | 1.87E-10 | 6.13E-07 | 6.82E-10 | 2.85E-06 | 6.43E-01 | 9.98E-01 | 5.53E-01 |
| 207.08635 | 73.42  | 12.93 | 14.37 | 15.12 | 15.54 | 6.65E-04 | 1.24E-01 | 4.84E-03 | 7.83E-04 | 6.87E-01 | 3.38E-01 | 9.28E-01 |
| 207.09672 | 179.59 | 17.98 | 15.16 | 15.48 | 15.84 | 4.44E-37 | 3.65E-14 | 3.65E-14 | 6.36E-14 | 3.59E-01 | 5.37E-03 | 2.91E-01 |
| 207.10212 | 194.11 | 16.97 | 14.54 | 14.67 | 15.16 | 8.80E-30 | 3.76E-14 | 4.21E-14 | 7.58E-14 | 9.30E-01 | 2.01E-02 | 8.96E-02 |
| 207.1024  | 283.12 | 16.80 | 15.08 | 14.93 | 15.32 | 3.46E-13 | 5.11E-10 | 1.05E-11 | 2.02E-07 | 9.40E-01 | 8.08E-01 | 4.62E-01 |
| 207.10316 | 30.99  | 15.23 | 16.79 | 17.57 | 14.46 | 5.56E-11 | 2.44E-03 | 1.10E-06 | 3.22E-01 | 3.15E-01 | 6.08E-06 | 7.71E-10 |
| 207.12399 | 288.35 | 20.43 | 20.17 | 19.80 | 20.63 | 1.19E-01 | 8.85E-01 | 2.57E-01 | 9.39E-01 | 7.08E-01 | 5.97E-01 | 1.01E-01 |
| 207.13064 | 29.5   | 18.24 | 19.96 | 18.62 | 19.19 | 1.89E-26 | 3.74E-14 | 3.58E-02 | 1.76E-09 | 7.52E-14 | 2.39E-06 | 7.48E-04 |
| 207.13777 | 22.92  | 17.60 | 14.67 | 15.58 | 16.21 | 2.76E-46 | 3.65E-14 | 3.65E-14 | 8.17E-14 | 2.14E-07 | 7.57E-14 | 9.16E-04 |
| 207.13781 | 293.48 | 18.46 | 17.12 | 17.32 | 17.13 | 1.16E-10 | 7.12E-09 | 7.47E-07 | 2.56E-08 | 7.95E-01 | 1.00E+00 | 8.43E-01 |
| 207.1741  | 23.69  | 17.20 | 14.56 | 15.27 | 15.35 | 9.95E-43 | 3.65E-14 | 3.67E-14 | 4.16E-14 | 5.16E-05 | 1.29E-05 | 9.67E-01 |
| 207.17426 | 286.64 | 17.84 | 16.63 | 16.73 | 16.71 | 4.49E-13 | 8.57E-11 | 1.72E-09 | 2.84E-09 | 9.41E-01 | 9.76E-01 | 9.99E-01 |
| 207.20671 | 30.54  | 18.42 | 19.26 | 19.23 | 19.57 | 5.82E-15 | 7.43E-09 | 1.41E-08 | 8.98E-14 | 9.98E-01 | 1.06E-01 | 6.82E-02 |
| 207.21075 | 180.59 | 16.94 | 14.16 | 14.26 | 14.64 | 1.02E-36 | 3.65E-14 | 3.65E-14 | 5.32E-14 | 9.62E-01 | 1.18E-01 | 2.87E-01 |
| 207.44072 | 102.07 | 16.02 | 14.44 | 15.67 | 14.81 | 8.33E-06 | 2.15E-05 | 7.07E-01 | 2.54E-03 | 2.19E-03 | 7.28E-01 | 6.77E-02 |
| 207.52702 | 285.28 | 16.53 | 14.84 | 15.79 | 14.08 | 4.71E-16 | 1.00E-08 | 2.91E-02 | 7.45E-14 | 3.80E-03 | 4.17E-02 | 3.88E-08 |
| 207.60105 | 26.23  | 16.71 | 18.38 | 17.80 | 20.61 | 1.40E-23 | 2.61E-06 | 4.04E-03 | 4.05E-14 | 2.90E-01 | 2.16E-09 | 1.22E-13 |
| 207.60655 | 25.33  | 16.97 | 20.88 | 18.75 | 19.88 | 2.56E-35 | 3.65E-14 | 2.68E-10 | 6.03E-14 | 4.64E-13 | 1.93E-03 | 2.79E-04 |
| 207.88923 | 44.47  | 16.13 | 16.25 | 16.04 | 16.46 | 2.25E-01 | 9.20E-01 | 9.70E-01 | 3.72E-01 | 7.19E-01 | 7.70E-01 | 1.91E-01 |
| 207.97983 | 36.97  | 17.86 | 11.78 | 12.53 | 13.34 | 3.76E-65 | 3.65E-14 | 3.65E-14 | 3.65E-14 | 2.72E-02 | 3.05E-07 | 1.86E-02 |
| 207.98865 | 274.16 | 14.80 | 16.74 | 17.09 | 16.68 | 1.35E-11 | 6.05E-08 | 1.17E-10 | 3.58E-07 | 7.33E-01 | 9.98E-01 | 6.34E-01 |
| 207.99828 | 69.17  | 19.69 | 19.98 | 20.82 | 19.81 | 2.08E-08 | 4.07E-01 | 3.40E-08 | 9.30E-01 | 1.23E-04 | 8.15E-01 | 3.80E-06 |
| 208.01354 | 46.79  | 20.83 | 22.08 | 22.00 | 21.80 | 4.01E-38 | 3.65E-14 | 3.65E-14 | 5.83E-14 | 7.76E-01 | 1.30E-02 | 1.37E-01 |
| 208.02369 | 85.31  | 15.66 | 15.45 | 15.18 | 15.71 | 2.48E-01 | 8.73E-01 | 3.11E-01 | 9.98E-01 | 7.87E-01 | 8.11E-01 | 2.73E-01 |
| 208.06931 | 57.7   | 18.78 | 17.60 | 16.96 | 17.10 | 7.45E-21 | 4.46E-09 | 7.45E-14 | 7.45E-14 | 4.11E-03 | 4.83E-02 | 8.92E-01 |
| 208.08823 | 52.6   | 15.86 | 15.45 | 15.46 | 15.43 | 5.58E-01 | 6.47E-01 | 6.61E-01 | 6.39E-01 | 1.00E+00 | 1.00E+00 | 1.00E+00 |
| 208.09689 | 20.52  | 16.89 | 12.37 | 14.71 | 14.29 | 1.54E-35 | 3.65E-14 | 2.88E-12 | 7.45E-14 | 5.31E-13 | 8.07E-09 | 4.96E-01 |
| 208.09699 | 177.52 | 17.56 | 14.75 | 14.88 | 15.72 | 2.69E-34 | 3.65E-14 | 3.65E-14 | 8.20E-14 | 9.16E-01 | 8.68E-05 | 9.31E-04 |
| 208.09993 | 285.29 | 19.66 | 18.00 | 18.21 | 17.90 | 7.69E-11 | 1.77E-08 | 7.17E-07 | 4.81E-09 | 8.78E-01 | 9.81E-01 | 6.80E-01 |
| 208.10831 | 25.16  | 15.49 | 18.31 | 16.87 | 17.14 | 1.92E-13 | 9.09E-14 | 2.23E-04 | 1.34E-05 | 1.79E-04 | 5.37E-03 | 8.63E-01 |
| 208.12749 | 178.75 | 17.36 | 14.59 | 14.28 | 15.17 | 1.43E-46 | 3.65E-14 | 3.65E-14 | 3.87E-14 | 3.25E-01 | 1.39E-02 | 2.39E-05 |

|           |        |       |       |       |       |          |          |          |          |          |          |          |
|-----------|--------|-------|-------|-------|-------|----------|----------|----------|----------|----------|----------|----------|
| 208.13326 | 175.43 | 16.97 | 15.07 | 14.90 | 15.29 | 1.80E-21 | 7.49E-14 | 7.53E-14 | 1.38E-12 | 8.49E-01 | 7.52E-01 | 2.78E-01 |
| 208.13885 | 181.56 | 16.74 | 14.23 | 14.93 | 14.46 | 3.80E-32 | 3.65E-14 | 7.49E-14 | 4.21E-14 | 2.04E-03 | 6.55E-01 | 8.67E-02 |
| 208.13977 | 24.55  | 13.23 | 16.01 | 12.46 | 15.54 | 3.77E-09 | 3.50E-05 | 5.60E-01 | 1.28E-03 | 1.40E-07 | 8.77E-01 | 1.11E-05 |
| 208.16953 | 199.99 | 16.35 | 12.91 | 13.41 | 13.50 | 2.18E-17 | 7.45E-14 | 3.60E-12 | 6.73E-11 | 5.93E-01 | 4.84E-01 | 9.96E-01 |
| 208.45727 | 101.23 | 15.73 | 14.88 | 15.50 | 14.70 | 5.17E-05 | 2.54E-03 | 7.66E-01 | 2.21E-04 | 5.72E-02 | 8.92E-01 | 8.68E-03 |
| 208.5053  | 97.51  | 17.35 | 16.52 | 17.43 | 16.03 | 7.61E-09 | 2.78E-03 | 9.86E-01 | 7.31E-07 | 1.12E-03 | 2.06E-01 | 2.61E-07 |
| 208.51273 | 258.23 | 14.28 | 14.15 | 13.53 | 12.11 | 6.66E-06 | 9.89E-01 | 2.88E-01 | 8.74E-06 | 4.97E-01 | 6.57E-05 | 9.58E-03 |
| 208.60885 | 25.73  | 15.20 | 17.49 | 15.60 | 18.31 | 1.37E-18 | 9.36E-10 | 6.52E-01 | 7.34E-14 | 8.64E-07 | 1.08E-01 | 5.39E-12 |
| 208.61748 | 25.45  | 15.64 | 13.54 | 16.53 | 16.08 | 4.07E-12 | 9.82E-07 | 9.56E-02 | 6.78E-01 | 7.81E-12 | 1.70E-08 | 6.91E-01 |
| 208.62311 | 24.14  | 15.16 | 16.41 | 17.54 | 15.73 | 1.90E-15 | 3.43E-05 | 7.48E-14 | 1.70E-01 | 3.13E-04 | 8.15E-02 | 4.66E-09 |
| 208.88375 | 42.4   | 19.09 | 20.31 | 20.10 | 20.20 | 2.16E-17 | 7.78E-14 | 2.92E-11 | 2.09E-12 | 4.68E-01 | 8.84E-01 | 9.06E-01 |
| 208.89083 | 48.63  | 17.97 | 19.72 | 19.76 | 19.76 | 8.01E-12 | 7.98E-09 | 2.60E-09 | 9.87E-09 | 9.99E-01 | 9.99E-01 | 1.00E+00 |
| 208.93538 | 48.3   | 14.87 | 13.54 | 14.16 | 13.53 | 7.31E-05 | 2.75E-04 | 1.21E-01 | 3.74E-04 | 2.29E-01 | 1.00E+00 | 2.37E-01 |
| 208.94373 | 43.25  | 12.62 | 14.00 | 14.73 | 13.22 | 3.98E-08 | 5.66E-04 | 2.81E-08 | 3.40E-01 | 1.81E-01 | 1.49E-01 | 3.13E-04 |
| 208.95218 | 257.05 | 17.61 | 16.35 | 16.78 | 17.20 | 2.09E-09 | 1.19E-09 | 7.72E-05 | 1.45E-01 | 1.25E-01 | 1.99E-04 | 1.51E-01 |
| 208.96138 | 38.01  | 15.45 | 17.27 | 16.92 | 16.69 | 8.94E-23 | 6.10E-14 | 7.54E-14 | 3.60E-11 | 1.85E-01 | 6.98E-03 | 5.49E-01 |
| 208.97498 | 42.3   | 18.40 | 12.07 | 12.84 | 13.99 | 2.04E-66 | 3.65E-14 | 3.65E-14 | 3.65E-14 | 2.50E-02 | 4.74E-10 | 3.12E-04 |
| 208.98725 | 88.22  | 17.30 | 16.86 | 17.34 | 17.20 | 1.82E-01 | 2.25E-01 | 9.99E-01 | 9.69E-01 | 1.92E-01 | 5.22E-01 | 9.41E-01 |
| 209.00189 | 64.51  | 15.97 | 12.80 | 15.01 | 13.78 | 2.63E-21 | 6.87E-14 | 7.49E-03 | 7.27E-11 | 4.54E-11 | 1.19E-02 | 6.33E-04 |
| 209.00483 | 195.64 | 11.37 | 14.44 | 15.73 | 15.72 | 8.22E-17 | 7.04E-08 | 9.47E-14 | 1.99E-13 | 7.47E-02 | 9.13E-02 | 1.00E+00 |
| 209.01242 | 66.62  | 15.67 | 11.88 | 13.27 | 14.02 | 3.38E-08 | 7.40E-09 | 4.01E-04 | 3.83E-02 | 1.07E-01 | 4.63E-03 | 6.30E-01 |
| 209.01648 | 59.51  | 17.72 | 17.61 | 17.76 | 17.67 | 8.04E-01 | 8.93E-01 | 9.93E-01 | 9.93E-01 | 7.73E-01 | 9.77E-01 | 9.53E-01 |
| 209.02486 | 34.56  | 14.79 | 15.52 | 16.45 | 15.83 | 9.72E-06 | 1.09E-01 | 2.35E-06 | 9.94E-03 | 2.51E-02 | 7.99E-01 | 2.52E-01 |
| 209.03595 | 90.55  | 17.46 | 16.51 | 17.19 | 17.19 | 5.80E-03 | 2.87E-03 | 7.42E-01 | 7.69E-01 | 6.89E-02 | 8.15E-02 | 1.00E+00 |
| 209.04085 | 27.34  | 16.21 | 19.07 | 17.67 | 19.33 | 6.79E-39 | 3.65E-14 | 8.47E-11 | 3.65E-14 | 1.20E-09 | 6.33E-01 | 2.61E-12 |
| 209.04809 | 61.26  | 15.38 | 11.74 | 13.37 | 15.65 | 3.11E-15 | 2.70E-12 | 1.56E-04 | 9.40E-01 | 4.84E-03 | 1.27E-12 | 4.04E-05 |
| 209.05899 | 174.45 | 15.48 | 15.28 | 15.70 | 15.85 | 5.40E-02 | 7.76E-01 | 6.97E-01 | 3.00E-01 | 1.97E-01 | 4.90E-02 | 9.03E-01 |
| 209.07268 | 61.13  | 22.47 | 21.96 | 21.60 | 21.16 | 1.26E-07 | 8.25E-02 | 3.12E-04 | 5.75E-08 | 3.51E-01 | 2.85E-03 | 2.13E-01 |
| 209.0791  | 61.64  | 17.29 | 13.78 | 15.53 | 15.25 | 3.80E-26 | 3.67E-14 | 3.20E-09 | 4.00E-11 | 1.46E-08 | 5.17E-06 | 7.70E-01 |
| 209.09203 | 44.08  | 19.69 | 18.83 | 19.09 | 18.77 | 3.59E-04 | 1.46E-03 | 4.87E-02 | 8.87E-04 | 6.81E-01 | 9.96E-01 | 5.57E-01 |
| 209.10292 | 60.09  | 16.49 | 11.94 | 13.34 | 13.72 | 1.26E-14 | 7.87E-14 | 3.02E-08 | 3.03E-06 | 4.59E-02 | 8.16E-03 | 9.03E-01 |
| 209.11721 | 160.47 | 18.14 | 12.58 | 13.10 | 13.47 | 5.20E-83 | 3.65E-14 | 3.65E-14 | 3.65E-14 | 4.37E-02 | 1.23E-04 | 2.72E-01 |
| 209.11867 | 24.47  | 18.52 | 22.94 | 21.09 | 22.29 | 3.63E-37 | 3.65E-14 | 7.45E-14 | 3.70E-14 | 1.60E-08 | 1.57E-01 | 6.32E-04 |
| 209.12817 | 217.87 | 16.50 | 12.68 | 14.22 | 14.09 | 1.17E-29 | 3.65E-14 | 1.39E-13 | 1.01E-13 | 1.05E-06 | 1.72E-05 | 9.75E-01 |
| 209.15343 | 22.14  | 17.60 | 14.78 | 16.16 | 16.15 | 3.38E-37 | 3.65E-14 | 9.54E-14 | 1.71E-13 | 1.29E-12 | 8.02E-12 | 1.00E+00 |
| 209.15349 | 277.3  | 18.43 | 17.08 | 17.36 | 16.72 | 4.47E-10 | 7.70E-07 | 1.19E-04 | 7.55E-10 | 6.80E-01 | 5.06E-01 | 6.38E-02 |
| 209.15359 | 143.83 | 18.54 | 17.41 | 18.38 | 17.79 | 8.54E-10 | 5.76E-09 | 7.98E-01 | 2.99E-04 | 1.26E-06 | 1.79E-01 | 9.19E-03 |
| 209.18982 | 23.57  | 17.11 | 14.51 | 14.89 | 16.02 | 4.80E-32 | 3.65E-14 | 4.67E-14 | 9.20E-07 | 2.26E-01 | 2.77E-11 | 5.79E-07 |
| 209.19002 | 168.9  | 17.78 | 15.46 | 15.09 | 16.24 | 3.18E-29 | 6.16E-14 | 3.67E-14 | 1.28E-10 | 3.41E-01 | 3.73E-03 | 4.13E-06 |
| 209.5219  | 86.21  | 15.72 | 16.69 | 17.58 | 16.99 | 2.71E-09 | 2.83E-03 | 6.02E-10 | 7.22E-05 | 1.08E-02 | 7.48E-01 | 1.78E-01 |
| 209.55161 | 86.14  | 18.11 | 20.30 | 20.22 | 19.87 | 5.42E-18 | 7.76E-14 | 9.18E-14 | 4.94E-10 | 9.91E-01 | 3.61E-01 | 5.26E-01 |
| 209.58353 | 90.28  | 17.74 | 18.27 | 18.96 | 17.71 | 1.12E-12 | 1.13E-02 | 4.48E-11 | 9.96E-01 | 5.72E-04 | 1.01E-02 | 1.45E-10 |
| 209.6166  | 24.66  | 15.21 | 15.06 | 15.22 | 16.89 | 1.78E-04 | 9.87E-01 | 1.00E+00 | 1.01E-03 | 9.84E-01 | 4.81E-04 | 1.60E-03 |
| 209.62076 | 24.37  | 16.97 | 20.81 | 18.98 | 20.41 | 2.83E-41 | 3.65E-14 | 9.38E-14 | 3.65E-14 | 1.26E-11 | 3.83E-01 | 2.84E-07 |
| 209.64357 | 23.45  | 14.42 | 11.62 | 15.63 | 14.00 | 1.76E-20 | 2.45E-12 | 5.29E-03 | 6.68E-01 | 6.43E-14 | 1.72E-08 | 1.72E-04 |
| 209.95655 | 67.92  | 16.06 | 16.22 | 15.69 | 15.93 | 5.87E-01 | 9.76E-01 | 7.63E-01 | 9.86E-01 | 5.32E-01 | 8.86E-01 | 9.37E-01 |
| 209.98336 | 84     | 15.79 | 17.28 | 17.65 | 16.64 | 6.34E-09 | 6.07E-06 | 7.54E-09 | 2.78E-02 | 6.12E-01 | 1.80E-01 | 7.46E-03 |
| 209.99613 | 48.31  | 19.17 | 19.25 | 19.89 | 19.51 | 1.81E-14 | 8.22E-01 | 1.71E-13 | 1.58E-03 | 8.87E-11 | 3.14E-02 | 2.63E-04 |
| 210.00139 | 93.87  | 16.74 | 17.56 | 18.07 | 16.66 | 1.66E-07 | 1.17E-02 | 3.99E-06 | 9.91E-01 | 2.20E-01 | 8.07E-03 | 3.91E-06 |
| 210.00734 | 112.85 | 16.96 | 15.09 | 16.08 | 16.06 | 2.08E-13 | 8.47E-14 | 4.14E-04 | 5.10E-04 | 7.54E-05 | 1.97E-04 | 1.00E+00 |
| 210.01174 | 43.78  | 18.00 | 18.95 | 18.90 | 18.73 | 2.32E-21 | 7.47E-14 | 7.52E-14 | 1.87E-11 | 9.67E-01 | 1.53E-01 | 3.39E-01 |
| 210.0188  | 70.8   | 17.05 | 17.24 | 17.09 | 17.44 | 2.72E-01 | 8.03E-01 | 9.99E-01 | 2.67E-01 | 8.82E-01 | 7.99E-01 | 3.60E-01 |
| 210.04449 | 83.97  | 16.15 | 16.24 | 17.51 | 17.02 | 1.08E-11 | 9.69E-01 | 3.26E-10 | 1.79E-04 | 1.39E-08 | 1.55E-03 | 9.05E-02 |
| 210.05099 | 64.26  | 19.09 | 18.38 | 19.05 | 19.00 | 4.15E-09 | 2.67E-08 | 9.82E-01 | 8.67E-01 | 3.76E-07 | 6.29E-06 | 9.78E-01 |
| 210.0759  | 293.81 | 17.13 | 16.60 | 16.54 | 16.26 | 1.28E-01 | 4.57E-01 | 3.59E-01 | 9.51E-02 | 9.99E-01 | 8.22E-01 | 8.86E-01 |
| 210.0867  | 81.03  | 16.35 | 15.43 | 15.36 | 15.43 | 2.43E-04 | 2.57E-03 | 8.70E-04 | 3.48E-03 | 9.94E-01 | 1.00E+00 | 9.95E-01 |
| 210.09715 | 280.25 | 15.82 | 14.15 | 15.27 | 15.11 | 2.42E-03 | 8.50E-04 | 5.75E-01 | 3.81E-01 | 5.83E-02 | 1.58E-01 | 9.85E-01 |
| 210.10663 | 293.28 | 18.79 | 17.33 | 17.26 | 17.39 | 6.69E-09 | 8.92E-07 | 1.74E-07 | 4.85E-06 | 9.94E-01 | 9.97E-01 | 9.67E-01 |
| 210.11252 | 180.59 | 17.20 | 14.92 | 14.51 | 15.15 | 3.61E-29 | 6.78E-14 | 3.67E-14 | 7.44E-14 | 2.53E-01 | 7.51E-01 | 2.73E-02 |
| 210.11581 | 154.71 | 18.46 | 15.29 | 15.43 | 15.86 | 1.39E-45 | 3.65E-14 | 3.65E-14 | 3.65E-14 | 8.96E-01 | 3.22E-02 | 1.59E-01 |
| 210.12251 | 26.78  | 16.14 | 17.18 | 15.64 | 16.90 | 3.02E-09 | 1.53E-04 | 1.54E-01 | 1.44E-02 | 1.39E-08 | 6.78E-01 | 8.73E-06 |
| 210.12337 | 201.66 | 16.03 | 12.36 | 12.97 | 13.23 | 1.94E-22 | 7.07E-14 | 7.62E-14 | 8.55E-13 | 3.16E-01 | 9.01E-02 | 9.00E-01 |
| 210.12688 | 24.13  | 16.51 | 19.17 | 17.26 | 18.96 | 1.85E-27 | 5.12E-14 | 7.40E-03 | 7.32E-14 | 8.93E-13 | 8.32E-01 | 4.44E-10 |
| 210.14884 | 187.85 | 16.76 | 14.61 | 14.75 | 15.12 | 3.75E-36 | 3.65E-14 | 3.65E-14 | 7.21E-14 | 8.21E-01 | 1.03E-02 | 9.67E-02 |
| 210.15698 | 178.32 | 15.31 | 9.54  | 11.86 | 11.16 | 6.05E-19 | 7.34E-14 | 2.71E-08 | 9.99E-11 | 5.21E-04 | 3.85E-02 | 6.40E-01 |
| 210.49195 | 301.68 | 14.72 | 15.60 | 15.57 | 13.91 | 4.07E-08 | 1.43E-02 | 1.77E-02 | 3.40E-02 | 1.00E+00 | 5.80E-07 | 7.37E-07 |
| 210.51493 | 272.67 | 17.22 | 18.92 | 19.51 | 17.44 | 9.95E-15 | 2.35E-07 | 2.05E-12 | 8.90E-01 | 2.16E-01 | 2.93E-05 | 1.69E-09 |
| 210.52055 | 87.78  | 15.31 | 15.05 | 15.97 | 15.18 | 1.06E-02 | 8.12E-01 | 8.74E-02 | 9.76E-01 | 9.97E-03 | 9.73E-01 | 4.41E-02 |

|           |        |       |       |       |       |          |          |          |          |          |          |          |
|-----------|--------|-------|-------|-------|-------|----------|----------|----------|----------|----------|----------|----------|
| 210.52845 | 92.74  | 17.17 | 14.59 | 13.96 | 14.57 | 3.74E-11 | 3.69E-07 | 1.57E-10 | 6.19E-07 | 5.50E-01 | 1.00E+00 | 5.96E-01 |
| 210.55038 | 85.98  | 16.28 | 16.79 | 16.65 | 16.81 | 2.25E-02 | 4.06E-02 | 2.03E-01 | 3.60E-02 | 8.97E-01 | 1.00E+00 | 8.57E-01 |
| 210.55357 | 85.91  | 14.70 | 15.16 | 14.57 | 14.46 | 2.72E-01 | 5.71E-01 | 9.84E-01 | 9.20E-01 | 3.77E-01 | 2.61E-01 | 9.92E-01 |
| 210.55995 | 76.89  | 16.56 | 15.38 | 15.65 | 15.49 | 6.57E-03 | 9.11E-03 | 6.51E-02 | 2.70E-02 | 8.97E-01 | 9.93E-01 | 9.77E-01 |
| 210.58235 | 95.08  | 15.62 | 15.42 | 15.80 | 15.40 | 3.84E-01 | 8.54E-01 | 8.96E-01 | 8.19E-01 | 4.63E-01 | 1.00E+00 | 4.30E-01 |
| 210.58992 | 140.6  | 12.51 | 13.45 | 14.03 | 13.68 | 8.69E-03 | 1.73E-01 | 5.69E-03 | 6.48E-02 | 6.20E-01 | 9.65E-01 | 8.95E-01 |
| 210.62853 | 24.14  | 14.29 | 16.76 | 14.87 | 16.65 | 1.23E-11 | 3.67E-09 | 4.16E-01 | 4.04E-08 | 1.50E-05 | 9.93E-01 | 8.18E-05 |
| 210.6514  | 23.16  | 14.93 | 15.34 | 17.08 | 16.67 | 1.48E-17 | 3.48E-01 | 7.87E-14 | 5.42E-10 | 5.64E-10 | 5.89E-06 | 4.04E-01 |
| 210.88205 | 44.44  | 15.68 | 15.33 | 14.93 | 15.62 | 2.49E-03 | 3.57E-01 | 2.58E-03 | 9.93E-01 | 2.60E-01 | 5.69E-01 | 1.19E-02 |
| 210.88789 | 48.57  | 16.10 | 16.61 | 16.43 | 16.81 | 1.49E-02 | 9.08E-02 | 4.23E-01 | 1.02E-02 | 8.48E-01 | 8.40E-01 | 3.63E-01 |
| 210.89915 | 266.64 | 18.21 | 11.72 | 11.74 | 12.42 | 1.54E-24 | 7.27E-14 | 7.21E-14 | 7.56E-14 | 1.00E+00 | 7.17E-01 | 7.35E-01 |
| 210.89927 | 110.26 | 17.79 | 11.96 | 14.10 | 12.40 | 5.91E-27 | 4.16E-14 | 7.74E-12 | 7.05E-14 | 2.21E-04 | 8.36E-01 | 7.08E-03 |
| 210.90579 | 25.99  | 15.37 | 9.79  | 12.39 | 10.92 | 3.76E-30 | 3.65E-14 | 6.23E-11 | 7.12E-14 | 3.16E-08 | 5.41E-02 | 5.24E-03 |
| 210.93257 | 300.71 | 17.61 | 14.89 | 14.47 | 16.65 | 3.35E-17 | 1.21E-11 | 7.93E-14 | 5.50E-02 | 6.65E-01 | 4.81E-05 | 2.06E-07 |
| 210.94059 | 38.12  | 18.84 | 22.11 | 22.01 | 21.81 | 9.37E-74 | 3.65E-14 | 3.65E-14 | 3.65E-14 | 8.70E-01 | 1.35E-01 | 4.75E-01 |
| 210.95049 | 297.72 | 17.58 | 13.03 | 13.34 | 14.75 | 3.36E-41 | 3.65E-14 | 3.65E-14 | 7.31E-14 | 7.28E-01 | 3.74E-07 | 3.55E-05 |
| 210.96815 | 107.82 | 21.00 | 17.77 | 18.35 | 17.78 | 1.96E-42 | 3.65E-14 | 3.67E-14 | 3.65E-14 | 3.77E-02 | 1.00E+00 | 4.57E-02 |
| 210.98526 | 87.2   | 16.42 | 17.69 | 17.86 | 17.45 | 6.78E-07 | 3.57E-05 | 1.43E-06 | 1.56E-03 | 9.23E-01 | 8.56E-01 | 4.90E-01 |
| 210.99946 | 81.28  | 12.50 | 14.77 | 15.22 | 13.68 | 5.32E-04 | 6.61E-03 | 5.50E-04 | 3.42E-01 | 9.18E-01 | 4.53E-01 | 1.51E-01 |
| 211.01691 | 253.64 | 12.71 | 13.62 | 14.73 | 12.27 | 1.73E-06 | 1.92E-01 | 6.98E-05 | 7.74E-01 | 8.32E-02 | 2.72E-02 | 3.22E-06 |
| 211.03238 | 100.61 | 17.23 | 13.16 | 12.91 | 15.08 | 5.21E-28 | 5.72E-14 | 4.03E-14 | 2.24E-07 | 9.14E-01 | 9.14E-06 | 3.41E-07 |
| 211.03934 | 69.75  | 20.14 | 20.81 | 21.78 | 20.67 | 1.61E-08 | 4.50E-02 | 2.50E-09 | 1.76E-01 | 1.24E-03 | 9.58E-01 | 2.49E-04 |
| 211.05296 | 80.77  | 18.07 | 19.65 | 20.64 | 19.22 | 3.43E-27 | 5.63E-13 | 3.65E-14 | 3.17E-07 | 1.57E-05 | 1.66E-01 | 6.08E-10 |
| 211.05636 | 80.68  | 14.57 | 16.16 | 15.37 | 15.93 | 1.62E-04 | 1.76E-04 | 1.33E-01 | 2.59E-03 | 1.71E-01 | 9.39E-01 | 4.87E-01 |
| 211.06396 | 25.09  | 11.76 | 15.93 | 12.34 | 16.65 | 1.84E-20 | 1.71E-12 | 6.95E-01 | 7.34E-14 | 2.49E-09 | 5.84E-01 | 3.50E-12 |
| 211.07141 | 214.81 | 16.29 | 16.57 | 17.31 | 17.04 | 7.76E-10 | 2.74E-01 | 1.74E-09 | 2.96E-05 | 3.71E-05 | 2.58E-02 | 3.48E-01 |
| 211.09651 | 193.5  | 16.75 | 14.35 | 14.61 | 15.04 | 2.17E-38 | 3.65E-14 | 3.65E-14 | 7.21E-14 | 3.92E-01 | 3.91E-04 | 5.46E-02 |
| 211.10759 | 287.06 | 19.82 | 17.78 | 17.80 | 18.05 | 7.53E-14 | 2.72E-11 | 3.12E-11 | 1.74E-08 | 1.00E+00 | 7.97E-01 | 8.37E-01 |
| 211.11573 | 34.21  | 12.73 | 16.68 | 14.29 | 15.96 | 1.84E-12 | 7.73E-12 | 1.56E-02 | 4.61E-08 | 8.08E-05 | 5.71E-01 | 1.41E-02 |
| 211.13276 | 289.84 | 17.87 | 16.73 | 16.69 | 16.61 | 2.87E-10 | 2.67E-07 | 8.38E-08 | 2.89E-08 | 9.98E-01 | 9.45E-01 | 9.79E-01 |
| 211.13315 | 22.37  | 17.54 | 15.38 | 15.60 | 16.42 | 2.87E-27 | 4.05E-14 | 6.58E-14 | 4.43E-08 | 6.39E-01 | 1.22E-06 | 1.80E-04 |
| 211.14415 | 195.07 | 17.52 | 14.67 | 14.71 | 15.32 | 3.50E-38 | 3.65E-14 | 3.65E-14 | 6.47E-14 | 9.98E-01 | 1.19E-02 | 1.91E-02 |
| 211.15294 | 23.09  | 14.12 | 11.90 | 14.27 | 14.39 | 3.81E-10 | 1.54E-07 | 9.76E-01 | 8.99E-01 | 3.93E-08 | 2.43E-08 | 9.91E-01 |
| 211.16914 | 290.39 | 17.31 | 16.17 | 16.08 | 16.12 | 3.90E-11 | 6.59E-08 | 3.42E-09 | 3.59E-08 | 9.65E-01 | 9.94E-01 | 9.97E-01 |
| 211.20562 | 164.54 | 17.48 | 15.04 | 14.82 | 15.42 | 1.05E-38 | 3.65E-14 | 3.65E-14 | 5.38E-14 | 6.24E-01 | 1.89E-01 | 8.50E-03 |
| 211.51711 | 268.94 | 14.70 | 17.18 | 17.36 | 16.40 | 4.11E-12 | 1.36E-09 | 5.66E-11 | 8.80E-05 | 9.66E-01 | 1.95E-01 | 6.86E-02 |
| 211.52268 | 272.77 | 14.86 | 17.34 | 16.73 | 15.59 | 2.32E-08 | 5.28E-08 | 4.87E-05 | 3.18E-01 | 4.86E-01 | 5.27E-04 | 4.48E-02 |
| 211.52285 | 140.17 | 15.05 | 16.42 | 15.23 | 14.39 | 5.24E-05 | 3.99E-03 | 9.69E-01 | 3.87E-01 | 2.07E-02 | 1.90E-05 | 1.98E-01 |
| 211.54123 | 80.68  | 16.72 | 16.55 | 17.00 | 16.16 | 1.44E-01 | 9.58E-01 | 8.52E-01 | 3.88E-01 | 5.82E-01 | 7.13E-01 | 9.84E-02 |
| 211.55247 | 97.93  | 19.83 | 17.51 | 18.21 | 17.85 | 1.48E-30 | 3.65E-14 | 7.56E-14 | 6.14E-14 | 1.01E-03 | 2.82E-01 | 2.23E-01 |
| 211.65946 | 33.61  | 13.16 | 14.90 | 15.48 | 15.29 | 3.97E-08 | 1.73E-04 | 1.74E-07 | 4.26E-06 | 5.01E-01 | 7.94E-01 | 9.72E-01 |
| 211.94043 | 291.27 | 18.31 | 16.54 | 16.01 | 17.77 | 6.33E-22 | 1.06E-12 | 7.14E-14 | 8.78E-02 | 1.02E-01 | 3.65E-06 | 1.51E-11 |
| 211.94405 | 37.29  | 15.57 | 16.46 | 16.24 | 16.43 | 5.42E-17 | 8.63E-14 | 2.82E-09 | 3.54E-13 | 1.71E-01 | 9.93E-01 | 3.10E-01 |
| 211.96325 | 109    | 17.86 | 17.00 | 17.48 | 16.93 | 5.20E-09 | 4.90E-07 | 6.98E-02 | 9.97E-08 | 1.39E-02 | 9.71E-01 | 4.25E-03 |
| 211.97634 | 95.95  | 14.68 | 14.07 | 15.39 | 14.25 | 7.08E-03 | 4.11E-01 | 2.59E-01 | 7.10E-01 | 6.42E-03 | 9.74E-01 | 3.02E-02 |
| 211.99428 | 46.63  | 16.45 | 14.97 | 14.95 | 15.73 | 1.29E-06 | 1.62E-05 | 9.10E-06 | 1.08E-01 | 1.00E+00 | 9.11E-02 | 7.26E-02 |
| 212.00676 | 44.24  | 15.95 | 15.14 | 15.61 | 15.55 | 2.09E-01 | 1.37E-01 | 7.94E-01 | 7.26E-01 | 6.13E-01 | 7.29E-01 | 9.99E-01 |
| 212.01477 | 286.69 | 13.90 | 16.77 | 17.16 | 16.30 | 5.80E-20 | 8.70E-14 | 7.47E-14 | 2.24E-10 | 6.67E-01 | 5.45E-01 | 7.09E-02 |
| 212.01493 | 183.66 | 11.25 | 15.53 | 14.63 | 14.35 | 5.28E-20 | 7.25E-14 | 4.09E-13 | 9.87E-11 | 1.65E-01 | 4.39E-02 | 9.20E-01 |
| 212.02463 | 86.44  | 13.85 | 15.22 | 14.34 | 14.15 | 7.87E-02 | 5.32E-02 | 7.96E-01 | 9.49E-01 | 3.72E-01 | 2.33E-01 | 9.87E-01 |
| 212.0319  | 263.24 | 16.80 | 15.38 | 15.99 | 15.33 | 5.16E-06 | 3.73E-05 | 4.07E-02 | 3.13E-05 | 2.15E-01 | 9.99E-01 | 1.75E-01 |
| 212.03342 | 90.37  | 16.81 | 9.62  | 10.67 | 11.86 | 7.84E-50 | 3.65E-14 | 3.65E-14 | 3.70E-14 | 3.86E-02 | 5.52E-07 | 1.83E-02 |
| 212.0374  | 78.84  | 14.65 | 15.87 | 15.58 | 15.31 | 9.77E-02 | 7.52E-02 | 2.47E-01 | 5.82E-01 | 9.42E-01 | 7.15E-01 | 9.55E-01 |
| 212.04215 | 102.12 | 17.09 | 15.97 | 17.19 | 16.80 | 5.00E-05 | 2.57E-04 | 9.82E-01 | 7.10E-01 | 8.55E-05 | 2.11E-02 | 5.01E-01 |
| 212.05255 | 89.12  | 17.72 | 16.37 | 17.01 | 16.41 | 1.17E-15 | 2.04E-13 | 1.09E-04 | 1.98E-12 | 1.24E-03 | 9.97E-01 | 3.69E-03 |
| 212.07386 | 34.99  | 15.20 | 17.00 | 12.50 | 12.49 | 1.54E-44 | 3.31E-09 | 7.45E-14 | 7.57E-14 | 3.65E-14 | 3.65E-14 | 1.00E+00 |
| 212.08526 | 59.36  | 15.29 | 14.15 | 14.96 | 14.51 | 5.49E-03 | 4.16E-03 | 7.50E-01 | 1.05E-01 | 8.57E-02 | 7.42E-01 | 5.70E-01 |
| 212.0916  | 284.5  | 20.94 | 20.16 | 19.47 | 20.41 | 2.47E-04 | 8.48E-02 | 6.90E-05 | 3.88E-01 | 1.85E-01 | 8.95E-01 | 3.93E-02 |
| 212.09168 | 141.99 | 19.86 | 19.38 | 19.45 | 19.44 | 6.11E-01 | 6.30E-01 | 7.37E-01 | 7.34E-01 | 9.98E-01 | 9.99E-01 | 1.00E+00 |
| 212.10287 | 81.57  | 19.00 | 20.30 | 20.12 | 20.08 | 2.27E-09 | 1.86E-08 | 1.10E-06 | 6.07E-06 | 8.44E-01 | 7.73E-01 | 9.98E-01 |
| 212.11099 | 209.27 | 17.03 | 13.15 | 13.92 | 14.16 | 3.26E-33 | 3.65E-14 | 5.12E-14 | 7.39E-14 | 3.82E-02 | 3.93E-03 | 8.36E-01 |
| 212.119   | 25.11  | 16.33 | 15.90 | 15.60 | 18.05 | 6.80E-13 | 5.00E-01 | 7.23E-02 | 3.89E-07 | 7.53E-01 | 7.86E-10 | 1.80E-12 |
| 212.12813 | 152.95 | 17.40 | 15.45 | 15.66 | 16.01 | 6.77E-29 | 3.74E-14 | 5.70E-14 | 8.77E-14 | 5.53E-01 | 5.10E-03 | 1.56E-01 |
| 212.12815 | 19.72  | 16.45 | 13.66 | 15.28 | 13.59 | 1.64E-22 | 7.58E-14 | 2.99E-04 | 7.56E-14 | 4.96E-07 | 9.96E-01 | 3.01E-07 |
| 212.16415 | 202.69 | 16.83 | 14.64 | 15.04 | 14.98 | 2.61E-37 | 3.65E-14 | 3.85E-14 | 3.85E-14 | 4.09E-02 | 1.37E-01 | 9.75E-01 |
| 212.38108 | 235.2  | 16.51 | 17.14 | 18.25 | 16.87 | 1.27E-16 | 5.17E-03 | 7.54E-14 | 2.53E-01 | 1.69E-07 | 5.17E-01 | 1.79E-10 |
| 212.48507 | 272.15 | 17.15 | 12.73 | 14.46 | 14.16 | 1.29E-15 | 7.57E-14 | 3.98E-07 | 4.94E-08 | 3.30E-03 | 2.90E-02 | 9.36E-01 |
| 212.52145 | 97.39  | 16.61 | 7.91  | 8.47  | 9.09  | 3.80E-62 | 3.65E-14 | 3.65E-14 | 3.65E-14 | 5.37E-01 | 3.38E-02 | 4.71E-01 |

|           |        |       |       |       |       |          |          |          |          |          |          |          |
|-----------|--------|-------|-------|-------|-------|----------|----------|----------|----------|----------|----------|----------|
| 212.56168 | 83.68  | 16.41 | 19.48 | 19.08 | 18.56 | 6.16E-39 | 3.65E-14 | 3.65E-14 | 7.01E-14 | 2.06E-01 | 1.38E-04 | 7.22E-02 |
| 212.61137 | 24.17  | 14.75 | 15.81 | 13.47 | 17.01 | 2.57E-18 | 1.12E-02 | 1.26E-03 | 4.58E-09 | 1.20E-09 | 6.25E-03 | 7.37E-14 |
| 212.71522 | 233.62 | 13.33 | 14.67 | 14.79 | 14.67 | 9.49E-05 | 1.45E-03 | 3.49E-04 | 2.00E-03 | 9.88E-01 | 1.00E+00 | 9.89E-01 |
| 212.83893 | 50.75  | 17.26 | 18.08 | 18.22 | 18.09 | 4.07E-05 | 1.40E-03 | 9.42E-05 | 1.51E-03 | 9.23E-01 | 1.00E+00 | 9.49E-01 |
| 212.85186 | 114.36 | 11.18 | 19.14 | 15.08 | 18.68 | 7.68E-27 | 4.47E-14 | 2.12E-07 | 6.98E-14 | 1.68E-07 | 9.21E-01 | 7.66E-06 |
| 212.93272 | 42.51  | 15.55 | 15.91 | 16.26 | 15.45 | 3.95E-02 | 6.10E-01 | 7.87E-02 | 9.89E-01 | 6.72E-01 | 4.63E-01 | 5.17E-02 |
| 212.9387  | 37.29  | 16.19 | 19.02 | 18.92 | 18.78 | 1.39E-69 | 3.65E-14 | 3.65E-14 | 3.65E-14 | 8.46E-01 | 2.64E-01 | 7.24E-01 |
| 212.94616 | 296.61 | 17.09 | 13.82 | 12.73 | 14.62 | 2.31E-23 | 9.04E-14 | 4.65E-14 | 1.07E-08 | 3.10E-02 | 2.04E-01 | 2.91E-05 |
| 212.94716 | 33.2   | 11.51 | 16.94 | 17.95 | 16.34 | 3.16E-35 | 3.87E-14 | 3.65E-14 | 7.21E-14 | 1.28E-01 | 5.97E-01 | 4.45E-03 |
| 212.95701 | 33.84  | 21.04 | 22.18 | 22.02 | 22.75 | 1.46E-14 | 5.80E-08 | 2.90E-06 | 7.99E-14 | 8.51E-01 | 2.87E-02 | 2.16E-03 |
| 212.97882 | 56.68  | 18.02 | 17.16 | 17.99 | 18.58 | 5.08E-07 | 1.18E-03 | 9.98E-01 | 8.51E-02 | 2.92E-03 | 9.77E-08 | 6.59E-02 |
| 213.00006 | 65.36  | 20.32 | 21.08 | 21.44 | 21.39 | 1.19E-12 | 9.52E-06 | 2.49E-11 | 6.47E-10 | 1.06E-01 | 2.25E-01 | 9.91E-01 |
| 213.01632 | 187.23 | 13.57 | 18.59 | 18.97 | 18.23 | 1.46E-38 | 3.65E-14 | 3.65E-14 | 3.76E-14 | 7.58E-01 | 8.06E-01 | 2.46E-01 |
| 213.02565 | 293.43 | 15.44 | 19.35 | 19.27 | 17.23 | 1.23E-68 | 3.65E-14 | 3.65E-14 | 7.16E-14 | 9.60E-01 | 3.96E-14 | 4.59E-14 |
| 213.02619 | 50.38  | 8.62  | 14.57 | 13.68 | 13.94 | 1.56E-26 | 4.90E-14 | 7.54E-14 | 7.38E-14 | 3.48E-01 | 6.68E-01 | 9.65E-01 |
| 213.034   | 64.94  | 12.74 | 14.56 | 15.06 | 12.23 | 9.12E-05 | 4.01E-02 | 3.85E-03 | 8.81E-01 | 8.90E-01 | 7.48E-03 | 5.64E-04 |
| 213.04434 | 56.88  | 16.72 | 14.68 | 13.54 | 14.21 | 3.28E-11 | 3.42E-05 | 3.05E-11 | 4.51E-07 | 5.87E-02 | 7.46E-01 | 4.70E-01 |
| 213.05363 | 81.69  | 17.33 | 16.29 | 16.13 | 15.70 | 4.29E-13 | 2.83E-06 | 3.76E-08 | 5.72E-13 | 8.64E-01 | 2.62E-02 | 1.60E-01 |
| 213.06377 | 72.64  | 17.21 | 16.92 | 16.66 | 16.70 | 1.41E-02 | 3.98E-01 | 1.70E-02 | 3.86E-02 | 5.35E-01 | 6.77E-01 | 9.98E-01 |
| 213.07474 | 71.94  | 14.99 | 15.44 | 16.27 | 15.85 | 7.28E-04 | 4.91E-01 | 3.83E-04 | 4.29E-02 | 5.49E-02 | 6.09E-01 | 5.96E-01 |
| 213.07964 | 24.55  | 11.90 | 14.93 | 10.03 | 15.64 | 7.35E-28 | 2.30E-09 | 3.33E-04 | 8.82E-13 | 7.21E-14 | 4.63E-01 | 4.43E-14 |
| 213.08687 | 280.24 | 17.17 | 15.01 | 15.26 | 15.52 | 5.81E-18 | 7.41E-14 | 2.66E-13 | 7.85E-10 | 7.56E-01 | 1.84E-01 | 7.07E-01 |
| 213.08695 | 128    | 17.46 | 15.07 | 15.24 | 15.55 | 4.20E-33 | 3.65E-14 | 3.74E-14 | 7.33E-14 | 7.99E-01 | 6.75E-02 | 3.79E-01 |
| 213.09507 | 276.98 | 17.59 | 15.40 | 14.70 | 15.84 | 2.32E-26 | 7.45E-14 | 3.72E-14 | 4.68E-11 | 2.24E-02 | 2.95E-01 | 4.43E-05 |
| 213.09769 | 90.13  | 17.39 | 17.66 | 17.60 | 17.60 | 5.95E-01 | 5.78E-01 | 7.41E-01 | 7.74E-01 | 9.93E-01 | 9.92E-01 | 1.00E+00 |
| 213.10642 | 69.62  | 15.72 | 15.24 | 15.27 | 15.24 | 6.23E-01 | 6.81E-01 | 7.28E-01 | 7.09E-01 | 1.00E+00 | 1.00E+00 | 1.00E+00 |
| 213.11216 | 173.09 | 17.74 | 15.52 | 15.78 | 16.14 | 5.90E-21 | 7.44E-14 | 7.45E-14 | 1.28E-10 | 6.64E-01 | 4.37E-02 | 4.10E-01 |
| 213.12337 | 138.97 | 18.46 | 15.99 | 16.77 | 16.72 | 1.87E-28 | 3.65E-14 | 7.41E-14 | 7.67E-14 | 4.15E-04 | 1.67E-03 | 9.95E-01 |
| 213.13064 | 29.87  | 15.26 | 14.42 | 17.78 | 16.70 | 4.67E-31 | 4.57E-03 | 7.27E-14 | 2.32E-07 | 3.65E-14 | 7.83E-14 | 2.94E-04 |
| 213.13231 | 267.41 | 16.49 | 8.03  | 8.31  | 8.75  | 7.61E-88 | 3.65E-14 | 3.65E-14 | 3.65E-14 | 7.67E-01 | 8.91E-02 | 4.83E-01 |
| 213.14809 | 271.49 | 17.35 | 15.83 | 15.43 | 16.06 | 1.54E-24 | 7.45E-14 | 4.39E-14 | 7.34E-12 | 8.74E-02 | 5.80E-01 | 2.29E-03 |
| 213.14856 | 165.81 | 17.58 | 15.11 | 15.53 | 16.11 | 1.56E-24 | 4.74E-14 | 7.38E-14 | 1.49E-09 | 2.27E-01 | 1.10E-04 | 5.54E-02 |
| 213.1636  | 23.83  | 18.63 | 15.48 | 16.57 | 17.29 | 3.21E-31 | 3.65E-14 | 7.35E-14 | 1.01E-07 | 1.81E-05 | 3.46E-12 | 1.34E-02 |
| 213.18484 | 287.28 | 17.47 | 16.31 | 16.19 | 16.60 | 2.45E-11 | 1.17E-08 | 1.72E-10 | 4.26E-05 | 9.10E-01 | 4.64E-01 | 1.50E-01 |
| 213.51953 | 86.43  | 15.44 | 16.72 | 16.34 | 16.16 | 3.78E-11 | 1.34E-11 | 1.57E-06 | 3.52E-04 | 1.48E-01 | 1.31E-02 | 7.41E-01 |
| 213.54649 | 26.81  | 17.08 | 19.33 | 16.71 | 16.57 | 4.40E-99 | 3.65E-14 | 6.95E-06 | 1.54E-09 | 3.65E-14 | 3.65E-14 | 2.94E-01 |
| 213.56046 | 81.95  | 13.47 | 15.97 | 15.66 | 15.15 | 9.04E-20 | 7.52E-14 | 8.03E-14 | 5.32E-09 | 6.39E-01 | 1.52E-02 | 2.38E-01 |
| 213.57807 | 80.11  | 16.68 | 16.64 | 16.93 | 17.02 | 4.51E-01 | 9.99E-01 | 7.73E-01 | 5.98E-01 | 7.15E-01 | 5.41E-01 | 9.89E-01 |
| 213.61907 | 23.86  | 16.28 | 15.43 | 12.97 | 16.67 | 2.56E-20 | 8.77E-02 | 7.57E-14 | 7.24E-01 | 1.47E-09 | 7.47E-03 | 7.49E-14 |
| 213.63188 | 23.14  | 15.08 | 11.87 | 15.22 | 13.77 | 2.59E-30 | 3.76E-14 | 9.47E-01 | 1.24E-05 | 3.72E-14 | 4.93E-10 | 1.83E-06 |
| 213.94098 | 188.52 | 18.04 | 16.25 | 15.70 | 18.26 | 3.54E-26 | 6.23E-12 | 7.61E-14 | 8.02E-01 | 1.06E-01 | 4.39E-13 | 7.09E-14 |
| 213.95542 | 31.25  | 16.57 | 17.66 | 17.38 | 17.24 | 1.52E-05 | 8.26E-06 | 1.42E-03 | 1.61E-02 | 6.00E-01 | 2.84E-01 | 9.36E-01 |
| 213.96085 | 40.71  | 16.23 | 16.69 | 16.33 | 17.58 | 2.59E-03 | 6.03E-01 | 9.94E-01 | 2.51E-03 | 7.72E-01 | 1.05E-01 | 7.48E-03 |
| 213.9787  | 276.51 | 18.08 | 16.68 | 16.55 | 17.03 | 5.84E-07 | 1.65E-05 | 1.72E-06 | 3.14E-03 | 9.74E-01 | 6.58E-01 | 3.96E-01 |
| 213.98924 | 272.71 | 15.46 | 18.52 | 18.85 | 17.91 | 1.05E-27 | 6.45E-14 | 3.87E-14 | 1.13E-13 | 6.66E-01 | 1.86E-01 | 1.02E-02 |
| 213.99549 | 82.47  | 14.66 | 17.69 | 17.88 | 16.31 | 4.43E-17 | 2.67E-13 | 7.83E-14 | 1.35E-04 | 9.59E-01 | 3.34E-03 | 5.00E-04 |
| 214.0041  | 52.76  | 20.00 | 19.12 | 20.82 | 19.97 | 2.31E-16 | 3.62E-06 | 1.85E-05 | 9.98E-01 | 7.46E-14 | 2.87E-05 | 2.92E-05 |
| 214.02562 | 245.24 | 19.49 | 21.07 | 19.78 | 19.82 | 5.29E-05 | 3.92E-05 | 8.24E-01 | 7.81E-01 | 1.71E-03 | 3.81E-03 | 1.00E+00 |
| 214.03427 | 252.51 | 13.83 | 17.22 | 16.78 | 14.90 | 1.48E-21 | 7.25E-14 | 7.83E-14 | 1.39E-02 | 5.84E-01 | 4.50E-09 | 2.09E-06 |
| 214.03542 | 80.7   | 11.62 | 16.43 | 15.75 | 16.05 | 2.21E-35 | 3.65E-14 | 4.03E-14 | 3.74E-14 | 2.38E-01 | 7.33E-01 | 8.54E-01 |
| 214.0431  | 229.97 | 15.94 | 14.76 | 14.93 | 14.63 | 3.10E-04 | 2.27E-03 | 1.14E-02 | 7.53E-04 | 9.59E-01 | 9.81E-01 | 8.19E-01 |
| 214.05114 | 260.13 | 19.92 | 14.11 | 23.80 | 18.46 | 8.08E-26 | 1.72E-12 | 2.35E-06 | 2.29E-01 | 3.67E-14 | 6.19E-07 | 5.95E-10 |
| 214.05864 | 77.41  | 19.09 | 20.18 | 20.29 | 20.03 | 1.61E-12 | 2.00E-09 | 2.97E-11 | 6.17E-07 | 9.19E-01 | 8.14E-01 | 4.30E-01 |
| 214.07091 | 276.98 | 19.16 | 16.90 | 16.40 | 17.24 | 2.71E-26 | 7.61E-14 | 3.90E-14 | 3.62E-13 | 1.61E-01 | 5.04E-01 | 3.86E-03 |
| 214.10372 | 26.84  | 16.19 | 17.51 | 16.77 | 19.03 | 3.99E-15 | 2.32E-04 | 2.46E-01 | 7.69E-14 | 1.03E-01 | 4.57E-05 | 4.27E-10 |
| 214.10725 | 288.23 | 19.29 | 18.24 | 18.07 | 18.40 | 4.17E-03 | 2.09E-02 | 4.48E-03 | 8.16E-02 | 9.70E-01 | 9.74E-01 | 8.23E-01 |
| 214.11869 | 63.89  | 14.88 | 14.83 | 15.74 | 13.85 | 2.73E-04 | 9.99E-01 | 1.33E-01 | 5.98E-02 | 1.21E-01 | 9.46E-02 | 6.08E-05 |
| 214.12667 | 49.69  | 17.54 | 11.42 | 10.74 | 12.39 | 1.21E-38 | 3.65E-14 | 3.65E-14 | 5.76E-14 | 4.60E-01 | 1.84E-01 | 3.52E-03 |
| 214.14346 | 279.36 | 17.21 | 15.70 | 15.55 | 15.84 | 2.44E-17 | 8.81E-13 | 7.59E-14 | 1.92E-10 | 8.67E-01 | 9.04E-01 | 4.76E-01 |
| 214.1438  | 176.03 | 17.77 | 15.55 | 15.72 | 15.87 | 2.43E-25 | 6.12E-14 | 7.25E-14 | 7.38E-14 | 8.45E-01 | 4.27E-01 | 8.84E-01 |
| 214.2165  | 266.52 | 16.75 | 14.46 | 14.25 | 15.65 | 1.26E-25 | 7.29E-14 | 5.16E-14 | 2.12E-05 | 7.79E-01 | 6.81E-06 | 5.59E-08 |
| 214.25283 | 22.68  | 16.24 | 13.39 | 13.68 | 15.06 | 1.42E-20 | 7.47E-14 | 7.49E-14 | 6.26E-04 | 7.79E-01 | 1.14E-06 | 6.49E-05 |
| 214.51744 | 281.25 | 19.65 | 21.40 | 22.47 | 20.86 | 5.23E-12 | 1.38E-05 | 8.24E-13 | 7.01E-03 | 2.05E-02 | 4.89E-01 | 1.68E-04 |
| 214.52428 | 139.68 | 15.39 | 14.18 | 13.00 | 13.07 | 4.06E-12 | 2.76E-03 | 1.11E-10 | 1.58E-09 | 4.46E-03 | 1.24E-02 | 9.97E-01 |
| 214.52723 | 248    | 14.68 | 16.95 | 16.13 | 15.00 | 4.64E-03 | 5.40E-03 | 1.41E-01 | 9.69E-01 | 6.38E-01 | 3.57E-02 | 3.90E-01 |
| 214.55283 | 261.91 | 20.11 | 12.11 | 24.38 | 17.12 | 7.54E-32 | 7.47E-14 | 3.46E-06 | 3.46E-03 | 3.65E-14 | 2.84E-07 | 1.64E-13 |
| 214.55887 | 76.64  | 17.80 | 17.49 | 17.56 | 17.15 | 8.74E-03 | 3.40E-01 | 5.54E-01 | 3.35E-03 | 9.84E-01 | 2.79E-01 | 1.37E-01 |
| 214.64699 | 56.88  | 16.51 | 16.90 | 16.68 | 16.72 | 2.45E-01 | 1.68E-01 | 8.04E-01 | 7.23E-01 | 6.62E-01 | 7.85E-01 | 9.98E-01 |

|           |        |       |       |       |       |          |          |          |          |          |          |          |
|-----------|--------|-------|-------|-------|-------|----------|----------|----------|----------|----------|----------|----------|
| 214.83583 | 48.48  | 17.49 | 18.10 | 18.25 | 18.08 | 9.40E-04 | 1.36E-02 | 9.48E-04 | 2.14E-02 | 8.86E-01 | 1.00E+00 | 8.63E-01 |
| 214.8498  | 107.92 | 13.71 | 15.90 | 10.91 | 16.14 | 1.14E-29 | 1.30E-06 | 3.83E-10 | 1.57E-07 | 4.03E-14 | 9.49E-01 | 3.85E-14 |
| 214.91757 | 262.42 | 22.15 | 16.71 | 17.10 | 18.03 | 2.29E-37 | 3.65E-14 | 3.65E-14 | 6.74E-14 | 7.50E-01 | 5.96E-03 | 8.73E-02 |
| 214.955   | 30.53  | 18.23 | 18.98 | 18.97 | 19.43 | 1.62E-08 | 3.08E-04 | 3.45E-04 | 4.63E-09 | 1.00E+00 | 9.22E-02 | 7.55E-02 |
| 214.96918 | 119.4  | 9.45  | 14.96 | 12.24 | 14.90 | 6.65E-18 | 7.59E-14 | 7.03E-05 | 9.91E-14 | 1.97E-04 | 1.00E+00 | 4.28E-04 |
| 214.98759 | 27.3   | 16.52 | 18.12 | 19.49 | 17.72 | 2.17E-28 | 5.59E-11 | 3.65E-14 | 1.72E-06 | 3.59E-08 | 3.43E-01 | 5.44E-12 |
| 214.99848 | 87.77  | 14.36 | 15.64 | 15.85 | 15.74 | 2.94E-07 | 6.89E-05 | 2.12E-06 | 2.49E-05 | 8.97E-01 | 9.87E-01 | 9.86E-01 |
| 215.00438 | 63.01  | 11.04 | 13.75 | 15.83 | 14.82 | 3.61E-14 | 2.77E-05 | 1.12E-13 | 5.73E-09 | 2.86E-03 | 2.94E-01 | 3.46E-01 |
| 215.019   | 271.94 | 17.09 | 18.00 | 18.78 | 17.71 | 1.66E-07 | 7.31E-03 | 2.77E-08 | 1.34E-01 | 3.42E-02 | 7.72E-01 | 1.96E-03 |
| 215.02803 | 139.67 | 12.71 | 14.49 | 13.22 | 11.46 | 1.52E-05 | 8.94E-03 | 7.97E-01 | 1.29E-01 | 1.20E-01 | 3.73E-06 | 1.55E-02 |
| 215.03414 | 78.75  | 14.57 | 14.85 | 14.11 | 15.47 | 4.23E-03 | 8.50E-01 | 5.74E-01 | 6.47E-02 | 1.79E-01 | 3.55E-01 | 1.90E-03 |
| 215.04189 | 136.13 | 11.93 | 14.69 | 13.77 | 13.96 | 2.79E-04 | 1.59E-04 | 2.21E-02 | 1.30E-02 | 5.06E-01 | 7.04E-01 | 9.93E-01 |
| 215.05203 | 202.2  | 18.68 | 22.01 | 18.49 | 21.58 | 2.42E-16 | 6.03E-11 | 9.77E-01 | 2.57E-08 | 1.58E-11 | 8.26E-01 | 6.71E-09 |
| 215.06147 | 71.08  | 16.37 | 14.74 | 15.40 | 15.05 | 1.27E-11 | 1.72E-11 | 7.87E-05 | 1.16E-07 | 2.03E-02 | 5.42E-01 | 4.40E-01 |
| 215.06878 | 68.66  | 18.38 | 19.72 | 19.38 | 19.71 | 5.06E-16 | 1.91E-13 | 2.06E-08 | 8.28E-13 | 1.72E-01 | 1.00E+00 | 2.23E-01 |
| 215.08144 | 198.8  | 16.25 | 13.65 | 13.58 | 12.97 | 1.33E-18 | 7.41E-12 | 1.23E-12 | 7.48E-14 | 9.96E-01 | 2.48E-01 | 3.46E-01 |
| 215.10247 | 280.13 | 20.11 | 18.06 | 17.43 | 18.17 | 3.13E-13 | 3.66E-08 | 5.42E-13 | 4.38E-07 | 2.70E-01 | 9.89E-01 | 1.61E-01 |
| 215.11146 | 227.75 | 17.06 | 14.05 | 13.78 | 14.88 | 5.08E-36 | 3.65E-14 | 3.65E-14 | 7.51E-14 | 6.71E-01 | 3.92E-03 | 4.86E-05 |
| 215.1277  | 289.81 | 17.66 | 16.51 | 16.51 | 16.14 | 2.57E-08 | 3.53E-05 | 2.80E-05 | 5.54E-08 | 1.00E+00 | 4.96E-01 | 4.94E-01 |
| 215.13819 | 40.7   | 18.32 | 16.96 | 17.72 | 17.56 | 8.19E-16 | 7.35E-14 | 2.65E-04 | 4.27E-06 | 3.59E-06 | 6.87E-04 | 7.12E-01 |
| 215.14259 | 195.25 | 16.72 | 14.07 | 14.16 | 14.59 | 1.27E-30 | 3.74E-14 | 3.94E-14 | 7.45E-14 | 9.73E-01 | 1.11E-01 | 2.50E-01 |
| 215.1441  | 21.58  | 16.82 | 12.69 | 15.22 | 15.17 | 4.48E-39 | 3.65E-14 | 1.34E-09 | 1.60E-09 | 7.31E-14 | 7.54E-14 | 9.97E-01 |
| 215.1641  | 203.98 | 16.31 | 13.20 | 13.84 | 13.80 | 5.75E-11 | 2.62E-10 | 4.28E-07 | 7.68E-07 | 5.13E-01 | 5.89E-01 | 1.00E+00 |
| 215.17921 | 23.71  | 17.31 | 14.55 | 14.98 | 15.99 | 6.89E-45 | 3.65E-14 | 3.65E-14 | 3.69E-13 | 4.24E-02 | 9.09E-14 | 4.58E-08 |
| 215.17932 | 278.43 | 17.11 | 15.33 | 15.18 | 15.84 | 1.14E-11 | 3.77E-09 | 1.21E-10 | 6.77E-05 | 9.54E-01 | 2.97E-01 | 1.06E-01 |
| 215.51984 | 191.4  | 12.22 | 14.74 | 14.93 | 14.10 | 2.19E-10 | 3.53E-08 | 1.91E-09 | 9.78E-05 | 9.68E-01 | 4.68E-01 | 2.25E-01 |
| 215.54046 | 227.49 | 13.96 | 15.12 | 15.53 | 15.07 | 1.66E-12 | 1.99E-07 | 1.52E-12 | 1.65E-06 | 2.09E-01 | 9.93E-01 | 1.33E-01 |
| 215.55195 | 261.59 | 16.27 | 12.68 | 20.09 | 14.04 | 1.26E-15 | 1.17E-04 | 2.82E-05 | 4.42E-02 | 7.78E-14 | 4.03E-01 | 1.80E-10 |
| 215.9364  | 158.83 | 16.27 | 14.49 | 13.89 | 16.09 | 7.73E-18 | 6.91E-09 | 8.33E-14 | 9.19E-01 | 1.54E-01 | 1.10E-06 | 1.01E-11 |
| 215.96484 | 29.41  | 15.60 | 14.21 | 14.29 | 14.86 | 7.90E-06 | 2.92E-05 | 7.16E-05 | 7.57E-02 | 9.95E-01 | 1.65E-01 | 2.51E-01 |
| 215.97804 | 31.5   | 14.76 | 11.78 | 17.30 | 16.47 | 3.83E-42 | 7.35E-14 | 4.92E-13 | 2.66E-06 | 3.65E-14 | 3.65E-14 | 6.88E-02 |
| 216.00989 | 47.07  | 18.45 | 19.13 | 19.30 | 18.71 | 2.63E-08 | 3.02E-05 | 8.07E-08 | 3.03E-01 | 6.64E-01 | 3.49E-02 | 8.49E-04 |
| 216.02134 | 138.2  | 15.74 | 15.05 | 12.50 | 13.33 | 6.35E-18 | 2.14E-01 | 7.49E-14 | 2.35E-09 | 2.63E-10 | 5.98E-05 | 1.24E-01 |
| 216.03236 | 67.36  | 16.35 | 15.20 | 15.33 | 15.37 | 1.05E-04 | 2.72E-04 | 1.47E-03 | 3.73E-03 | 9.67E-01 | 9.38E-01 | 9.99E-01 |
| 216.05217 | 198.06 | 16.76 | 18.12 | 18.55 | 18.55 | 3.03E-13 | 5.11E-07 | 2.35E-11 | 1.23E-10 | 3.29E-01 | 3.71E-01 | 1.00E+00 |
| 216.05615 | 66.72  | 14.08 | 14.55 | 14.67 | 14.54 | 4.85E-01 | 6.61E-01 | 4.65E-01 | 6.86E-01 | 9.92E-01 | 1.00E+00 | 9.91E-01 |
| 216.06307 | 190.7  | 17.76 | 21.59 | 16.58 | 19.61 | 2.15E-09 | 4.00E-06 | 3.93E-01 | 7.86E-02 | 2.78E-09 | 6.28E-02 | 9.11E-04 |
| 216.06315 | 89.05  | 24.60 | 24.71 | 24.87 | 24.56 | 4.74E-02 | 7.52E-01 | 8.66E-02 | 9.87E-01 | 5.53E-01 | 5.87E-01 | 5.40E-02 |
| 216.07304 | 55.29  | 14.67 | 14.42 | 13.35 | 14.52 | 5.56E-06 | 7.78E-01 | 7.48E-06 | 9.41E-01 | 7.54E-04 | 9.86E-01 | 2.82E-04 |
| 216.08656 | 148.26 | 21.48 | 20.45 | 19.48 | 20.68 | 4.24E-07 | 1.39E-02 | 6.10E-08 | 1.03E-01 | 2.92E-02 | 9.14E-01 | 4.75E-03 |
| 216.09613 | 283.31 | 17.37 | 15.69 | 15.62 | 15.95 | 2.04E-14 | 2.18E-11 | 2.26E-12 | 3.81E-08 | 9.91E-01 | 6.95E-01 | 5.07E-01 |
| 216.09628 | 176.04 | 18.17 | 15.39 | 15.27 | 15.81 | 3.25E-32 | 3.76E-14 | 3.67E-14 | 7.31E-14 | 9.59E-01 | 3.16E-01 | 1.20E-01 |
| 216.1058  | 215.11 | 17.02 | 13.86 | 13.93 | 14.43 | 5.87E-31 | 3.74E-14 | 3.85E-14 | 7.56E-14 | 9.93E-01 | 1.51E-01 | 2.44E-01 |
| 216.12291 | 288.15 | 18.71 | 17.26 | 17.02 | 17.28 | 3.28E-08 | 1.13E-05 | 1.55E-07 | 2.43E-05 | 8.51E-01 | 1.00E+00 | 8.40E-01 |
| 216.15937 | 278.91 | 17.54 | 15.83 | 15.54 | 16.10 | 9.36E-21 | 8.20E-14 | 7.19E-14 | 1.27E-10 | 4.84E-01 | 5.72E-01 | 3.84E-02 |
| 216.15945 | 158.79 | 18.22 | 15.64 | 15.22 | 16.23 | 2.38E-36 | 3.67E-14 | 3.65E-14 | 7.27E-14 | 1.88E-01 | 3.56E-02 | 2.73E-05 |
| 216.49397 | 113.54 | 20.08 | 12.89 | 16.93 | 13.47 | 6.58E-37 | 3.65E-14 | 6.13E-09 | 3.65E-14 | 7.55E-13 | 6.90E-01 | 1.62E-09 |
| 216.51389 | 191.92 | 13.70 | 14.60 | 15.53 | 13.23 | 8.77E-05 | 2.81E-01 | 1.68E-03 | 7.99E-01 | 2.72E-01 | 5.19E-02 | 1.17E-04 |
| 216.52946 | 86.18  | 14.82 | 16.50 | 16.56 | 15.38 | 5.96E-11 | 2.58E-08 | 5.33E-09 | 1.93E-01 | 9.96E-01 | 9.14E-04 | 3.47E-04 |
| 216.55001 | 196.17 | 11.24 | 13.78 | 12.87 | 13.52 | 1.70E-04 | 2.38E-04 | 3.52E-02 | 1.75E-03 | 4.66E-01 | 9.78E-01 | 7.41E-01 |
| 216.60629 | 26.3   | 17.07 | 19.00 | 18.35 | 20.90 | 1.55E-28 | 2.09E-10 | 3.10E-05 | 3.65E-14 | 1.02E-01 | 3.65E-09 | 7.61E-14 |
| 216.61184 | 24.9   | 17.31 | 21.64 | 18.89 | 20.50 | 7.74E-43 | 3.65E-14 | 9.21E-09 | 3.74E-14 | 6.74E-14 | 1.74E-04 | 2.94E-08 |
| 216.83305 | 49.11  | 16.47 | 15.81 | 15.84 | 16.26 | 3.18E-04 | 1.33E-03 | 2.26E-03 | 6.50E-01 | 9.98E-01 | 7.92E-02 | 1.13E-01 |
| 216.89784 | 100.5  | 15.63 | 14.55 | 15.19 | 14.78 | 2.24E-05 | 2.03E-05 | 1.94E-01 | 1.68E-03 | 3.49E-02 | 7.86E-01 | 3.19E-01 |
| 216.92229 | 33.87  | 20.64 | 22.30 | 22.35 | 22.43 | 1.91E-19 | 1.29E-13 | 8.23E-14 | 7.94E-14 | 9.95E-01 | 9.41E-01 | 9.86E-01 |
| 216.94967 | 27.98  | 19.35 | 21.97 | 22.03 | 21.47 | 1.05E-60 | 3.65E-14 | 3.65E-14 | 3.65E-14 | 9.69E-01 | 1.49E-03 | 2.42E-04 |
| 217.06027 | 97.85  | 16.44 | 14.36 | 15.44 | 14.51 | 5.55E-06 | 1.57E-05 | 9.11E-02 | 1.19E-04 | 7.27E-02 | 9.87E-01 | 1.75E-01 |
| 217.06783 | 92.66  | 20.62 | 20.37 | 20.58 | 20.14 | 2.49E-03 | 2.44E-01 | 9.92E-01 | 3.13E-03 | 4.07E-01 | 3.66E-01 | 9.76E-03 |
| 217.08186 | 71.14  | 17.15 | 16.38 | 16.69 | 16.97 | 5.73E-03 | 3.86E-03 | 1.69E-01 | 8.61E-01 | 5.24E-01 | 6.49E-02 | 6.42E-01 |
| 217.08993 | 285.99 | 18.36 | 16.53 | 16.43 | 16.47 | 1.20E-17 | 1.03E-12 | 1.10E-13 | 6.56E-13 | 9.72E-01 | 9.93E-01 | 9.99E-01 |
| 217.09037 | 20.44  | 17.19 | 14.79 | 13.35 | 15.03 | 4.81E-40 | 7.01E-14 | 3.65E-14 | 7.44E-14 | 1.65E-08 | 7.42E-01 | 1.21E-10 |
| 217.10521 | 168.64 | 17.44 | 15.40 | 16.24 | 16.52 | 2.72E-16 | 7.47E-14 | 2.98E-07 | 2.43E-04 | 9.74E-04 | 9.60E-06 | 6.02E-01 |
| 217.11357 | 24.89  | 15.31 | 19.24 | 16.43 | 18.11 | 6.46E-31 | 3.65E-14 | 9.52E-04 | 7.44E-14 | 7.54E-14 | 2.03E-03 | 7.63E-07 |
| 217.11809 | 180.9  | 17.18 | 14.62 | 14.91 | 15.48 | 1.23E-44 | 3.65E-14 | 3.65E-14 | 6.01E-14 | 2.43E-01 | 1.05E-06 | 2.11E-03 |
| 217.12227 | 198.19 | 16.55 | 14.09 | 14.46 | 14.68 | 7.98E-19 | 7.41E-14 | 2.79E-13 | 1.62E-10 | 5.09E-01 | 1.47E-01 | 8.57E-01 |
| 217.12934 | 50.26  | 16.49 | 16.08 | 16.59 | 16.43 | 1.60E-01 | 2.79E-01 | 9.72E-01 | 9.91E-01 | 1.33E-01 | 4.93E-01 | 8.97E-01 |
| 217.1384  | 23.13  | 14.29 | 11.28 | 16.05 | 14.29 | 8.85E-36 | 7.26E-14 | 4.49E-08 | 1.00E+00 | 3.65E-14 | 7.47E-14 | 2.31E-07 |
| 217.15467 | 35.12  | 16.71 | 17.46 | 17.48 | 17.32 | 1.11E-02 | 2.45E-02 | 1.88E-02 | 1.11E-01 | 1.00E+00 | 9.59E-01 | 9.42E-01 |

|           |        |       |       |       |       |          |          |          |          |          |          |          |
|-----------|--------|-------|-------|-------|-------|----------|----------|----------|----------|----------|----------|----------|
| 217.15848 | 22.87  | 16.91 | 13.78 | 14.83 | 15.27 | 2.61E-47 | 3.65E-14 | 3.65E-14 | 7.45E-14 | 7.27E-09 | 7.96E-14 | 5.13E-02 |
| 217.15868 | 168.77 | 18.02 | 15.71 | 16.10 | 16.23 | 1.78E-27 | 3.87E-14 | 7.39E-14 | 7.54E-14 | 1.97E-01 | 5.46E-02 | 9.19E-01 |
| 217.19484 | 23.17  | 17.63 | 15.81 | 15.82 | 16.34 | 2.26E-34 | 3.65E-14 | 3.65E-14 | 7.42E-14 | 1.00E+00 | 1.67E-03 | 2.08E-03 |
| 217.19495 | 292.25 | 19.07 | 17.83 | 17.72 | 17.44 | 1.20E-07 | 1.32E-04 | 1.81E-05 | 4.24E-07 | 9.78E-01 | 5.53E-01 | 7.87E-01 |
| 217.51053 | 99.33  | 16.05 | 13.36 | 16.12 | 14.73 | 6.19E-16 | 2.55E-13 | 9.97E-01 | 7.45E-04 | 2.40E-13 | 7.13E-04 | 4.82E-04 |
| 217.54039 | 88.19  | 20.59 | 17.00 | 18.22 | 17.61 | 5.38E-43 | 3.65E-14 | 5.07E-14 | 3.65E-14 | 3.40E-07 | 3.56E-02 | 3.30E-02 |
| 217.57231 | 98.52  | 20.81 | 18.63 | 19.22 | 18.64 | 7.10E-22 | 7.36E-14 | 3.35E-11 | 7.56E-14 | 4.52E-02 | 1.00E+00 | 5.98E-02 |
| 217.59776 | 114.76 | 13.94 | 15.40 | 15.69 | 14.98 | 1.68E-20 | 9.65E-14 | 7.34E-14 | 9.71E-08 | 3.50E-01 | 9.78E-02 | 6.07E-04 |
| 217.61431 | 25.57  | 13.83 | 16.90 | 14.66 | 17.62 | 4.66E-17 | 1.41E-10 | 2.25E-01 | 9.51E-14 | 6.16E-06 | 3.99E-01 | 3.46E-09 |
| 217.63228 | 24.29  | 14.93 | 15.89 | 13.16 | 16.30 | 1.88E-16 | 2.75E-02 | 2.41E-06 | 6.98E-04 | 1.58E-12 | 6.66E-01 | 7.69E-14 |
| 217.70681 | 235.03 | 21.32 | 22.88 | 23.94 | 22.37 | 1.62E-13 | 7.12E-06 | 9.58E-14 | 7.01E-03 | 5.76E-03 | 4.06E-01 | 1.66E-05 |
| 217.91252 | 24.62  | 15.74 | 15.97 | 16.50 | 16.14 | 3.84E-04 | 5.73E-01 | 1.40E-04 | 1.36E-01 | 2.01E-02 | 8.12E-01 | 2.09E-01 |
| 217.92596 | 48.86  | 15.76 | 15.82 | 16.07 | 16.17 | 1.90E-01 | 9.89E-01 | 4.44E-01 | 2.27E-01 | 6.69E-01 | 4.09E-01 | 9.68E-01 |
| 217.93806 | 98.96  | 16.08 | 19.18 | 17.71 | 18.77 | 4.14E-25 | 4.65E-14 | 2.97E-08 | 7.29E-14 | 1.46E-06 | 4.75E-01 | 1.31E-03 |
| 217.99689 | 24.39  | 11.58 | 13.65 | 13.48 | 14.30 | 4.94E-40 | 3.70E-14 | 4.41E-14 | 3.65E-14 | 7.29E-01 | 1.47E-03 | 2.13E-05 |
| 218.00647 | 81.29  | 17.16 | 18.78 | 19.00 | 18.92 | 5.18E-20 | 2.64E-13 | 7.38E-14 | 8.27E-14 | 7.14E-01 | 9.11E-01 | 9.83E-01 |
| 218.01245 | 45.06  | 14.95 | 19.03 | 12.94 | 14.73 | 1.63E-40 | 4.32E-14 | 1.38E-07 | 9.25E-01 | 3.65E-14 | 4.39E-14 | 1.32E-05 |
| 218.0339  | 111.47 | 15.73 | 13.19 | 14.95 | 13.21 | 4.69E-06 | 6.25E-05 | 5.04E-01 | 1.13E-04 | 1.35E-02 | 1.00E+00 | 1.82E-02 |
| 218.04136 | 237.05 | 19.03 | 20.57 | 21.82 | 20.15 | 1.76E-14 | 1.27E-05 | 7.36E-14 | 3.78E-03 | 9.11E-04 | 5.91E-01 | 6.44E-06 |
| 218.042   | 87.14  | 17.57 | 15.81 | 16.08 | 16.11 | 1.72E-09 | 1.25E-08 | 1.17E-06 | 5.02E-06 | 8.01E-01 | 7.56E-01 | 9.99E-01 |
| 218.06249 | 257.95 | 15.02 | 13.57 | 15.65 | 15.57 | 2.18E-09 | 7.43E-05 | 2.12E-01 | 3.55E-01 | 1.30E-08 | 1.27E-07 | 9.96E-01 |
| 218.06731 | 91.45  | 18.12 | 17.46 | 17.76 | 17.47 | 1.38E-07 | 1.21E-06 | 2.04E-02 | 2.83E-06 | 7.59E-02 | 1.00E+00 | 9.56E-02 |
| 218.09354 | 184.88 | 17.86 | 14.78 | 14.90 | 15.46 | 7.85E-45 | 3.65E-14 | 3.65E-14 | 3.72E-14 | 9.26E-01 | 4.68E-03 | 2.77E-02 |
| 218.10221 | 147.36 | 23.12 | 23.53 | 23.45 | 23.14 | 6.43E-01 | 7.07E-01 | 8.23E-01 | 1.00E+00 | 9.97E-01 | 7.80E-01 | 8.77E-01 |
| 218.11188 | 276.86 | 21.06 | 19.27 | 18.82 | 19.64 | 1.30E-10 | 4.53E-07 | 1.40E-10 | 1.48E-04 | 5.13E-01 | 7.00E-01 | 7.27E-02 |
| 218.12079 | 28.94  | 16.40 | 16.43 | 16.59 | 15.41 | 2.16E-01 | 1.00E+00 | 9.88E-01 | 3.37E-01 | 9.93E-01 | 3.42E-01 | 2.11E-01 |
| 218.13855 | 41.88  | 24.21 | 24.69 | 24.66 | 24.48 | 9.44E-04 | 1.80E-03 | 3.19E-03 | 1.82E-01 | 9.98E-01 | 4.45E-01 | 5.52E-01 |
| 218.14997 | 65.84  | 15.94 | 17.24 | 16.90 | 17.16 | 1.38E-10 | 1.86E-09 | 1.13E-05 | 3.93E-08 | 3.23E-01 | 9.82E-01 | 5.74E-01 |
| 218.15367 | 24.16  | 18.31 | 17.04 | 18.48 | 18.23 | 7.40E-08 | 4.03E-06 | 8.90E-01 | 9.89E-01 | 2.40E-07 | 5.75E-05 | 7.58E-01 |
| 218.18633 | 65.97  | 13.43 | 15.05 | 13.78 | 15.87 | 1.95E-11 | 2.47E-05 | 7.37E-01 | 2.72E-10 | 2.05E-03 | 1.11E-01 | 1.28E-07 |
| 218.19839 | 209.93 | 16.53 | 13.63 | 14.09 | 14.83 | 5.13E-28 | 3.72E-14 | 6.87E-14 | 1.04E-10 | 2.37E-01 | 1.48E-05 | 1.42E-02 |
| 218.3721  | 237.29 | 17.35 | 18.99 | 20.44 | 18.81 | 2.18E-16 | 5.32E-06 | 7.52E-14 | 1.04E-04 | 1.07E-04 | 9.54E-01 | 1.72E-05 |
| 218.6401  | 23.97  | 16.50 | 18.55 | 16.17 | 18.68 | 1.27E-27 | 8.07E-14 | 4.70E-01 | 7.45E-14 | 7.56E-14 | 9.52E-01 | 7.17E-14 |
| 218.70712 | 239.31 | 15.98 | 16.11 | 17.29 | 15.88 | 3.43E-04 | 9.83E-01 | 1.36E-03 | 9.92E-01 | 7.12E-03 | 9.27E-01 | 1.08E-03 |
| 218.91965 | 49.39  | 18.85 | 20.50 | 20.58 | 20.67 | 8.37E-19 | 4.62E-13 | 9.19E-14 | 8.20E-14 | 9.76E-01 | 8.63E-01 | 9.81E-01 |
| 218.93043 | 88.44  | 16.50 | 19.79 | 20.27 | 18.91 | 7.29E-32 | 4.34E-14 | 3.65E-14 | 1.33E-13 | 3.48E-01 | 2.01E-02 | 4.93E-05 |
| 218.95392 | 30.22  | 18.60 | 14.91 | 14.89 | 16.61 | 8.12E-39 | 3.65E-14 | 3.65E-14 | 6.71E-12 | 1.00E+00 | 1.20E-08 | 6.19E-09 |
| 218.97206 | 48.18  | 18.67 | 11.50 | 12.05 | 15.01 | 2.07E-81 | 3.65E-14 | 3.65E-14 | 3.65E-14 | 1.41E-01 | 3.65E-14 | 5.32E-14 |
| 218.97446 | 283.36 | 16.17 | 19.55 | 19.32 | 17.91 | 7.12E-31 | 3.67E-14 | 3.94E-14 | 7.59E-09 | 8.49E-01 | 1.38E-07 | 5.37E-06 |
| 218.984   | 270.07 | 22.36 | 22.07 | 21.20 | 21.58 | 7.35E-05 | 6.89E-01 | 6.38E-05 | 2.04E-02 | 6.57E-03 | 2.84E-01 | 5.00E-01 |
| 218.98418 | 118.69 | 22.29 | 21.94 | 22.29 | 21.83 | 1.03E-01 | 3.99E-01 | 1.00E+00 | 1.88E-01 | 4.17E-01 | 9.66E-01 | 2.03E-01 |
| 218.98906 | 44.92  | 17.18 | 16.13 | 16.42 | 16.78 | 9.86E-06 | 6.46E-06 | 1.76E-03 | 2.45E-01 | 5.30E-01 | 1.97E-02 | 3.63E-01 |
| 219.00515 | 255.05 | 20.87 | 23.65 | 24.05 | 23.10 | 2.05E-45 | 3.65E-14 | 3.65E-14 | 4.16E-14 | 1.51E-01 | 2.93E-02 | 1.23E-05 |
| 219.01762 | 88.81  | 19.93 | 17.05 | 18.10 | 17.75 | 2.32E-33 | 3.65E-14 | 7.54E-14 | 6.63E-14 | 3.55E-06 | 6.39E-03 | 3.26E-01 |
| 219.02637 | 62.85  | 19.69 | 18.71 | 18.45 | 18.52 | 2.70E-12 | 3.96E-07 | 7.88E-11 | 2.64E-09 | 4.70E-01 | 7.19E-01 | 9.85E-01 |
| 219.03804 | 231.43 | 14.31 | 16.42 | 17.79 | 15.98 | 2.03E-14 | 1.58E-06 | 7.49E-14 | 3.45E-04 | 4.80E-03 | 7.22E-01 | 1.23E-04 |
| 219.04176 | 99.77  | 21.72 | 18.41 | 20.17 | 18.84 | 1.55E-28 | 3.72E-14 | 1.01E-07 | 6.83E-14 | 4.44E-09 | 4.39E-01 | 2.00E-05 |
| 219.06999 | 40.01  | 13.66 | 15.09 | 13.11 | 17.10 | 4.78E-15 | 9.84E-03 | 6.07E-01 | 1.73E-11 | 1.69E-04 | 2.34E-04 | 1.10E-13 |
| 219.08773 | 210.14 | 16.89 | 13.62 | 13.88 | 14.22 | 3.71E-23 | 7.21E-14 | 7.43E-14 | 1.68E-13 | 8.60E-01 | 2.76E-01 | 7.22E-01 |
| 219.09706 | 185.35 | 17.46 | 15.26 | 15.66 | 15.58 | 8.90E-23 | 6.96E-14 | 7.98E-14 | 7.69E-14 | 2.47E-01 | 4.71E-01 | 9.84E-01 |
| 219.09748 | 83.34  | 19.57 | 20.40 | 20.92 | 20.71 | 3.24E-08 | 1.82E-03 | 4.34E-08 | 9.49E-06 | 1.12E-01 | 5.45E-01 | 8.27E-01 |
| 219.1022  | 242.22 | 15.97 | 13.30 | 13.00 | 13.42 | 7.61E-15 | 1.07E-10 | 6.01E-13 | 1.80E-09 | 8.64E-01 | 9.91E-01 | 7.14E-01 |
| 219.10546 | 279.45 | 20.52 | 19.38 | 18.51 | 19.14 | 4.35E-08 | 2.92E-03 | 1.11E-08 | 2.56E-04 | 4.51E-02 | 8.91E-01 | 2.56E-01 |
| 219.12429 | 28.23  | 18.01 | 17.44 | 17.24 | 17.00 | 2.43E-08 | 2.35E-03 | 1.48E-05 | 2.17E-08 | 6.41E-01 | 5.17E-02 | 4.71E-01 |
| 219.12436 | 169.87 | 17.17 | 14.36 | 14.39 | 15.23 | 1.78E-49 | 3.65E-14 | 3.65E-14 | 4.14E-14 | 9.98E-01 | 3.42E-06 | 6.34E-06 |
| 219.13391 | 126.07 | 19.92 | 21.10 | 20.92 | 20.93 | 2.84E-08 | 1.59E-07 | 1.01E-05 | 1.81E-05 | 8.16E-01 | 8.51E-01 | 1.00E+00 |
| 219.13808 | 281.45 | 17.13 | 15.71 | 15.89 | 15.82 | 6.18E-09 | 1.01E-07 | 3.42E-06 | 2.09E-06 | 8.82E-01 | 9.72E-01 | 9.93E-01 |
| 219.14194 | 37.05  | 20.85 | 21.43 | 21.38 | 21.11 | 2.09E-04 | 4.32E-04 | 1.51E-03 | 2.84E-01 | 9.84E-01 | 1.62E-01 | 2.99E-01 |
| 219.15695 | 23.98  | 15.52 | 12.63 | 14.28 | 14.48 | 2.92E-09 | 3.19E-10 | 1.60E-02 | 7.73E-02 | 9.14E-04 | 2.45E-04 | 9.66E-01 |
| 219.17414 | 284.27 | 20.07 | 19.45 | 19.34 | 19.36 | 9.17E-02 | 2.46E-01 | 1.19E-01 | 1.66E-01 | 9.87E-01 | 9.95E-01 | 1.00E+00 |
| 219.21046 | 24.02  | 18.19 | 16.39 | 16.58 | 17.03 | 9.97E-37 | 3.65E-14 | 3.65E-14 | 7.37E-14 | 4.38E-01 | 1.35E-05 | 3.98E-03 |
| 219.21051 | 297.97 | 18.19 | 18.23 | 18.06 | 18.36 | 8.49E-01 | 9.99E-01 | 9.76E-01 | 9.55E-01 | 9.53E-01 | 9.81E-01 | 8.07E-01 |
| 219.52009 | 275.89 | 15.55 | 16.84 | 17.42 | 16.25 | 2.24E-17 | 2.89E-09 | 7.45E-14 | 3.81E-03 | 2.22E-02 | 2.70E-02 | 2.89E-07 |
| 219.54341 | 97.71  | 18.58 | 14.40 | 16.11 | 15.48 | 8.81E-30 | 3.65E-14 | 4.03E-13 | 7.38E-14 | 1.21E-06 | 6.63E-03 | 2.19E-01 |
| 219.55922 | 128.2  | 13.17 | 14.27 | 14.19 | 15.41 | 1.22E-06 | 2.05E-02 | 3.60E-02 | 1.66E-07 | 9.96E-01 | 2.56E-02 | 1.27E-02 |
| 219.64805 | 251.21 | 20.98 | 17.40 | 17.71 | 17.79 | 1.05E-37 | 3.65E-14 | 3.65E-14 | 3.72E-14 | 6.23E-01 | 4.52E-01 | 9.89E-01 |
| 219.64817 | 147.57 | 18.98 | 16.12 | 15.77 | 16.39 | 3.55E-45 | 3.65E-14 | 3.65E-14 | 3.65E-14 | 2.94E-01 | 5.35E-01 | 1.25E-02 |
| 219.93122 | 87.12  | 15.28 | 15.46 | 15.94 | 15.60 | 3.51E-02 | 8.59E-01 | 2.03E-02 | 5.17E-01 | 1.74E-01 | 9.37E-01 | 4.96E-01 |

|           |        |       |       |       |       |          |          |          |          |          |          |          |
|-----------|--------|-------|-------|-------|-------|----------|----------|----------|----------|----------|----------|----------|
| 219.93572 | 119.42 | 12.75 | 13.31 | 10.74 | 14.28 | 1.15E-07 | 7.46E-01 | 2.23E-03 | 4.27E-02 | 7.62E-05 | 3.71E-01 | 5.23E-08 |
| 219.9681  | 275.72 | 18.97 | 19.09 | 19.12 | 19.01 | 8.65E-01 | 9.31E-01 | 8.68E-01 | 9.98E-01 | 9.99E-01 | 9.80E-01 | 9.49E-01 |
| 219.98826 | 111.53 | 17.95 | 16.00 | 17.20 | 16.33 | 2.90E-20 | 7.64E-14 | 9.08E-04 | 3.80E-13 | 4.04E-08 | 3.65E-01 | 1.89E-04 |
| 220.00851 | 275.68 | 15.77 | 19.43 | 20.02 | 18.79 | 3.67E-49 | 3.65E-14 | 3.65E-14 | 3.67E-14 | 6.56E-02 | 4.72E-02 | 5.39E-06 |
| 220.00865 | 51.75  | 15.16 | 13.21 | 14.18 | 14.24 | 3.88E-06 | 5.65E-07 | 2.88E-02 | 5.69E-02 | 3.84E-02 | 3.22E-02 | 9.99E-01 |
| 220.03687 | 252.2  | 13.01 | 14.10 | 14.60 | 13.38 | 6.69E-04 | 4.13E-02 | 6.45E-04 | 8.23E-01 | 6.24E-01 | 3.39E-01 | 2.35E-02 |
| 220.06673 | 53.84  | 16.32 | 14.99 | 13.79 | 16.94 | 2.14E-15 | 1.53E-03 | 8.88E-11 | 3.34E-01 | 6.71E-03 | 3.77E-06 | 1.16E-13 |
| 220.08137 | 75.88  | 16.39 | 15.60 | 15.18 | 16.62 | 3.11E-09 | 3.85E-03 | 1.68E-06 | 7.71E-01 | 2.93E-01 | 2.42E-04 | 6.55E-08 |
| 220.09259 | 66.15  | 16.80 | 15.92 | 16.76 | 16.06 | 5.60E-05 | 6.55E-04 | 9.97E-01 | 8.27E-03 | 1.97E-03 | 9.32E-01 | 1.90E-02 |
| 220.09999 | 278.78 | 17.96 | 16.13 | 16.04 | 16.49 | 2.11E-22 | 7.54E-14 | 7.44E-14 | 7.51E-12 | 9.60E-01 | 2.88E-01 | 1.08E-01 |
| 220.10831 | 180.84 | 16.76 | 13.72 | 14.03 | 14.74 | 9.34E-39 | 3.65E-14 | 3.65E-14 | 7.43E-14 | 4.22E-01 | 1.58E-05 | 4.91E-03 |
| 220.11788 | 35.22  | 22.54 | 21.47 | 21.33 | 21.36 | 2.03E-23 | 7.64E-14 | 7.28E-14 | 7.45E-14 | 6.62E-01 | 7.97E-01 | 9.97E-01 |
| 220.12738 | 286.24 | 17.60 | 16.05 | 16.33 | 16.02 | 9.30E-19 | 7.80E-14 | 3.89E-11 | 7.65E-14 | 4.08E-01 | 9.97E-01 | 3.21E-01 |
| 220.12749 | 176.3  | 17.95 | 15.98 | 16.09 | 16.27 | 5.65E-20 | 7.38E-14 | 7.47E-14 | 2.18E-12 | 9.57E-01 | 5.78E-01 | 8.57E-01 |
| 220.13135 | 23.14  | 14.70 | 14.71 | 17.70 | 14.58 | 2.54E-14 | 1.00E+00 | 1.75E-11 | 9.92E-01 | 9.08E-11 | 9.89E-01 | 3.95E-11 |
| 220.1331  | 209.08 | 16.55 | 13.21 | 12.35 | 14.32 | 2.29E-35 | 4.19E-14 | 3.65E-14 | 4.46E-12 | 1.81E-02 | 1.52E-03 | 1.64E-09 |
| 220.13624 | 133.81 | 16.33 | 17.29 | 17.63 | 17.37 | 1.55E-12 | 3.39E-07 | 3.84E-12 | 7.84E-08 | 2.28E-01 | 9.76E-01 | 4.76E-01 |
| 220.1424  | 29.76  | 16.67 | 14.74 | 15.94 | 15.80 | 5.23E-05 | 1.09E-05 | 2.48E-01 | 1.44E-01 | 1.65E-02 | 5.44E-02 | 9.87E-01 |
| 220.14971 | 20.66  | 15.68 | 15.24 | 14.12 | 15.24 | 2.01E-06 | 4.07E-01 | 6.79E-07 | 4.41E-01 | 1.13E-03 | 1.00E+00 | 1.49E-03 |
| 220.17774 | 168.47 | 17.44 | 15.09 | 15.28 | 15.67 | 6.00E-22 | 7.27E-14 | 7.54E-14 | 1.24E-11 | 8.46E-01 | 8.72E-02 | 3.89E-01 |
| 220.2141  | 173.53 | 16.76 | 13.84 | 14.00 | 15.08 | 4.07E-31 | 3.67E-14 | 3.83E-14 | 9.75E-11 | 9.18E-01 | 4.47E-06 | 6.22E-05 |
| 220.55046 | 95.5   | 18.59 | 17.17 | 17.89 | 17.08 | 2.70E-06 | 3.42E-05 | 1.04E-01 | 1.81E-05 | 9.53E-02 | 9.94E-01 | 5.88E-02 |
| 220.55739 | 83.81  | 17.12 | 13.09 | 13.29 | 14.03 | 1.31E-42 | 3.65E-14 | 3.65E-14 | 4.14E-14 | 8.65E-01 | 3.61E-03 | 3.41E-02 |
| 220.63268 | 23.78  | 14.82 | 12.35 | 15.21 | 13.32 | 2.61E-15 | 6.49E-11 | 6.57E-01 | 1.79E-04 | 2.74E-13 | 4.26E-02 | 2.14E-06 |
| 220.66447 | 22.94  | 12.62 | 10.60 | 15.15 | 12.07 | 1.63E-13 | 9.10E-04 | 1.37E-05 | 7.37E-01 | 1.01E-13 | 4.38E-02 | 4.30E-07 |
| 220.88351 | 120.89 | 17.84 | 9.58  | 12.47 | 11.91 | 3.59E-43 | 3.65E-14 | 4.50E-14 | 3.74E-14 | 4.66E-08 | 2.85E-05 | 6.71E-01 |
| 220.90766 | 29.11  | 16.60 | 11.26 | 11.72 | 12.18 | 2.95E-86 | 3.65E-14 | 3.65E-14 | 3.65E-14 | 6.15E-02 | 1.28E-05 | 6.89E-02 |
| 220.92802 | 87.31  | 15.57 | 15.93 | 16.21 | 15.82 | 3.02E-02 | 3.38E-01 | 1.47E-02 | 6.53E-01 | 5.72E-01 | 9.68E-01 | 3.16E-01 |
| 220.96782 | 74.96  | 22.96 | 20.03 | 20.26 | 21.64 | 6.47E-52 | 3.65E-14 | 3.65E-14 | 2.13E-13 | 4.80E-01 | 7.42E-14 | 1.16E-13 |
| 220.973   | 98.15  | 14.94 | 13.49 | 14.81 | 14.51 | 5.60E-06 | 7.21E-06 | 9.70E-01 | 4.74E-01 | 8.30E-05 | 5.85E-03 | 7.56E-01 |
| 220.98163 | 92.73  | 12.33 | 15.71 | 16.07 | 14.25 | 1.39E-13 | 2.48E-10 | 2.03E-12 | 8.86E-04 | 8.91E-01 | 2.60E-02 | 2.63E-03 |
| 220.99347 | 86.15  | 15.35 | 14.95 | 15.05 | 15.19 | 2.17E-01 | 1.86E-01 | 4.29E-01 | 8.60E-01 | 9.59E-01 | 6.66E-01 | 9.11E-01 |
| 221.00095 | 70.13  | 19.88 | 20.31 | 21.20 | 20.69 | 3.02E-18 | 8.44E-03 | 7.23E-14 | 8.20E-08 | 3.39E-09 | 3.81E-02 | 2.10E-03 |
| 221.00942 | 270.34 | 15.38 | 15.21 | 16.43 | 15.41 | 4.16E-10 | 7.80E-01 | 1.48E-07 | 9.98E-01 | 2.85E-09 | 7.13E-01 | 1.76E-06 |
| 221.01846 | 78.33  | 20.66 | 22.02 | 21.37 | 21.28 | 5.73E-14 | 7.63E-14 | 3.33E-05 | 6.68E-04 | 3.99E-04 | 7.22E-05 | 9.45E-01 |
| 221.0298  | 87     | 16.39 | 17.61 | 18.39 | 17.62 | 1.21E-08 | 5.61E-04 | 2.15E-09 | 6.94E-04 | 6.63E-02 | 1.00E+00 | 8.57E-02 |
| 221.0591  | 142.52 | 16.59 | 16.56 | 15.07 | 16.15 | 7.90E-10 | 1.00E+00 | 6.08E-09 | 2.80E-01 | 3.17E-08 | 3.56E-01 | 1.70E-04 |
| 221.07654 | 96.89  | 17.53 | 18.97 | 18.82 | 18.68 | 8.51E-16 | 1.27E-13 | 8.80E-12 | 4.45E-09 | 8.17E-01 | 3.63E-01 | 8.59E-01 |
| 221.08444 | 25.61  | 15.44 | 16.17 | 16.57 | 16.81 | 3.13E-04 | 1.16E-01 | 3.31E-03 | 3.44E-04 | 6.37E-01 | 2.51E-01 | 8.91E-01 |
| 221.09201 | 43.33  | 16.89 | 14.86 | 16.64 | 15.96 | 9.80E-08 | 1.25E-07 | 8.87E-01 | 4.95E-02 | 7.71E-06 | 1.68E-02 | 2.53E-01 |
| 221.10326 | 290.21 | 18.47 | 17.63 | 17.62 | 17.66 | 1.26E-02 | 3.44E-02 | 2.89E-02 | 5.20E-02 | 1.00E+00 | 1.00E+00 | 9.99E-01 |
| 221.11287 | 52.53  | 15.83 | 15.51 | 15.78 | 15.88 | 1.47E-01 | 2.12E-01 | 9.88E-01 | 9.92E-01 | 3.90E-01 | 1.53E-01 | 9.37E-01 |
| 221.11996 | 26.37  | 19.32 | 21.19 | 19.61 | 21.43 | 2.00E-22 | 9.67E-14 | 5.69E-01 | 7.27E-14 | 1.60E-10 | 7.29E-01 | 8.89E-13 |
| 221.12268 | 172.04 | 18.27 | 13.97 | 15.49 | 14.51 | 1.30E-26 | 3.96E-14 | 1.73E-12 | 7.29E-14 | 3.46E-04 | 4.96E-01 | 5.20E-02 |
| 221.15333 | 24.51  | 18.52 | 16.40 | 17.33 | 17.30 | 1.10E-38 | 3.65E-14 | 7.67E-14 | 7.43E-14 | 7.04E-11 | 1.21E-09 | 9.94E-01 |
| 221.15347 | 276    | 18.92 | 16.83 | 16.68 | 17.46 | 5.48E-15 | 7.23E-12 | 2.67E-13 | 3.71E-06 | 9.60E-01 | 1.42E-01 | 4.28E-02 |
| 221.16231 | 51.49  | 17.24 | 15.10 | 16.64 | 16.35 | 3.25E-08 | 6.99E-09 | 2.76E-01 | 5.28E-02 | 7.48E-05 | 2.99E-03 | 8.49E-01 |
| 221.18588 | 50.44  | 19.45 | 17.82 | 19.12 | 19.01 | 3.97E-09 | 2.28E-09 | 5.30E-01 | 3.03E-01 | 4.48E-06 | 6.38E-05 | 9.74E-01 |
| 221.18984 | 284.48 | 17.45 | 16.21 | 15.99 | 16.33 | 1.64E-13 | 2.23E-09 | 1.27E-12 | 1.61E-07 | 6.48E-01 | 9.30E-01 | 3.01E-01 |
| 221.18998 | 152.07 | 17.89 | 15.98 | 16.30 | 16.75 | 2.07E-22 | 6.41E-14 | 7.43E-14 | 1.08E-08 | 2.90E-01 | 3.34E-04 | 7.82E-02 |
| 221.22615 | 22.81  | 16.70 | 11.78 | 13.33 | 13.50 | 9.25E-43 | 3.65E-14 | 3.83E-14 | 5.54E-14 | 9.15E-07 | 1.25E-07 | 9.39E-01 |
| 221.22631 | 173.89 | 17.13 | 14.51 | 14.84 | 15.30 | 1.83E-34 | 3.65E-14 | 3.72E-14 | 7.51E-14 | 3.13E-01 | 4.81E-04 | 8.80E-02 |
| 221.42665 | 30.83  | 13.26 | 9.88  | 16.19 | 13.54 | 2.34E-30 | 1.50E-12 | 5.09E-10 | 9.25E-01 | 3.65E-14 | 5.72E-13 | 1.18E-07 |
| 221.49118 | 92.88  | 13.98 | 13.54 | 14.96 | 13.34 | 2.27E-02 | 8.49E-01 | 2.60E-01 | 6.56E-01 | 5.31E-02 | 9.85E-01 | 2.40E-02 |
| 221.50822 | 94.55  | 15.97 | 15.99 | 16.05 | 15.85 | 8.10E-01 | 1.00E+00 | 9.73E-01 | 9.37E-01 | 9.89E-01 | 9.12E-01 | 7.63E-01 |
| 221.53045 | 87.78  | 15.71 | 15.45 | 16.38 | 15.78 | 9.28E-04 | 6.32E-01 | 1.76E-02 | 9.93E-01 | 4.39E-04 | 5.03E-01 | 5.87E-02 |
| 221.56673 | 80.19  | 19.07 | 18.38 | 19.24 | 17.80 | 5.07E-11 | 4.34E-03 | 8.47E-01 | 2.51E-08 | 3.19E-04 | 3.55E-02 | 7.55E-10 |
| 221.62072 | 24.41  | 16.42 | 18.99 | 17.66 | 19.45 | 3.19E-29 | 6.43E-14 | 2.30E-06 | 3.72E-14 | 7.42E-07 | 2.73E-01 | 7.41E-11 |
| 221.64377 | 30.41  | 12.58 | 11.45 | 14.61 | 10.68 | 3.38E-08 | 2.68E-01 | 6.20E-03 | 1.69E-02 | 8.19E-06 | 6.47E-01 | 4.26E-08 |
| 221.92747 | 93.26  | 14.96 | 13.06 | 14.92 | 14.14 | 5.40E-03 | 7.51E-03 | 1.00E+00 | 5.23E-01 | 1.17E-02 | 3.07E-01 | 5.83E-01 |
| 221.96776 | 53.5   | 17.14 | 12.14 | 12.63 | 15.05 | 1.36E-56 | 3.65E-14 | 3.65E-14 | 2.11E-13 | 2.32E-01 | 5.76E-14 | 7.34E-14 |
| 221.97115 | 60.23  | 18.17 | 13.72 | 13.59 | 15.66 | 2.01E-30 | 3.92E-14 | 3.72E-14 | 1.93E-09 | 9.84E-01 | 1.07E-05 | 1.67E-06 |
| 221.9842  | 92.02  | 17.20 | 16.00 | 16.13 | 16.16 | 1.39E-10 | 3.09E-09 | 1.02E-07 | 6.74E-07 | 9.02E-01 | 8.42E-01 | 9.98E-01 |
| 222.0012  | 85.87  | 14.66 | 17.36 | 17.33 | 16.94 | 2.51E-19 | 7.45E-14 | 7.49E-14 | 1.72E-11 | 1.00E+00 | 5.70E-01 | 6.19E-01 |
| 222.00615 | 44.78  | 16.17 | 17.23 | 16.23 | 17.79 | 3.23E-04 | 5.81E-02 | 9.99E-01 | 1.19E-03 | 9.25E-02 | 5.86E-01 | 2.57E-03 |
| 222.01243 | 106.12 | 16.25 | 16.94 | 16.78 | 16.15 | 1.72E-01 | 3.27E-01 | 5.53E-01 | 9.95E-01 | 9.81E-01 | 2.56E-01 | 4.49E-01 |
| 222.02287 | 270.99 | 19.47 | 21.64 | 22.10 | 20.38 | 2.41E-12 | 3.82E-08 | 2.02E-11 | 7.07E-02 | 6.09E-01 | 5.57E-03 | 5.03E-05 |
| 222.02899 | 86.4   | 20.35 | 23.56 | 22.88 | 22.76 | 8.87E-39 | 3.65E-14 | 3.72E-14 | 4.72E-14 | 7.49E-03 | 1.74E-03 | 9.50E-01 |

|           |        |       |       |       |       |          |          |          |          |          |          |          |
|-----------|--------|-------|-------|-------|-------|----------|----------|----------|----------|----------|----------|----------|
| 222.03767 | 93.35  | 15.71 | 15.29 | 16.00 | 15.61 | 1.71E-01 | 5.12E-01 | 7.84E-01 | 9.90E-01 | 1.12E-01 | 7.46E-01 | 6.37E-01 |
| 222.04038 | 41.12  | 16.64 | 13.33 | 16.64 | 15.39 | 3.48E-16 | 1.01E-13 | 1.00E+00 | 1.17E-02 | 1.72E-13 | 7.94E-06 | 1.48E-02 |
| 222.05874 | 86.6   | 18.52 | 17.50 | 18.07 | 17.54 | 1.54E-06 | 8.80E-06 | 1.21E-01 | 3.46E-05 | 3.90E-02 | 9.98E-01 | 7.21E-02 |
| 222.06842 | 76.38  | 16.94 | 15.52 | 15.59 | 15.51 | 6.70E-07 | 1.61E-05 | 4.10E-05 | 2.37E-05 | 9.95E-01 | 1.00E+00 | 9.92E-01 |
| 222.07306 | 29.07  | 14.53 | 15.85 | 12.31 | 16.28 | 1.38E-20 | 3.47E-03 | 9.22E-08 | 7.26E-05 | 7.39E-14 | 7.16E-01 | 7.38E-14 |
| 222.07995 | 24.79  | 14.54 | 17.73 | 16.05 | 18.69 | 1.94E-32 | 6.43E-14 | 3.48E-06 | 3.65E-14 | 4.89E-07 | 1.33E-02 | 9.43E-14 |
| 222.08343 | 80.61  | 17.45 | 15.53 | 15.48 | 15.43 | 4.50E-15 | 5.37E-11 | 1.15E-11 | 1.84E-11 | 9.98E-01 | 9.85E-01 | 9.98E-01 |
| 222.09716 | 129.92 | 16.34 | 14.75 | 14.94 | 15.41 | 6.19E-20 | 7.54E-14 | 7.89E-14 | 3.72E-07 | 6.39E-01 | 8.52E-04 | 3.34E-02 |
| 222.10683 | 208.02 | 15.68 | 9.60  | 11.34 | 11.68 | 1.93E-16 | 7.36E-14 | 1.28E-09 | 6.91E-08 | 5.18E-02 | 1.71E-02 | 9.62E-01 |
| 222.1144  | 278.23 | 17.79 | 15.78 | 15.80 | 15.91 | 8.14E-18 | 1.24E-13 | 1.18E-13 | 4.86E-12 | 1.00E+00 | 9.58E-01 | 9.69E-01 |
| 222.12225 | 25.21  | 15.49 | 14.56 | 13.31 | 16.48 | 3.72E-12 | 8.75E-02 | 3.46E-07 | 6.98E-02 | 1.07E-02 | 3.99E-05 | 2.76E-12 |
| 222.12687 | 24.29  | 16.93 | 19.97 | 18.10 | 19.66 | 3.08E-31 | 3.67E-14 | 7.60E-06 | 5.38E-14 | 2.63E-12 | 5.92E-01 | 1.23E-08 |
| 222.14303 | 283.92 | 17.93 | 16.37 | 16.21 | 15.34 | 2.49E-14 | 1.56E-06 | 7.49E-08 | 8.38E-14 | 9.51E-01 | 5.95E-03 | 2.68E-02 |
| 222.14882 | 170.02 | 16.99 | 14.86 | 15.25 | 15.35 | 2.48E-26 | 4.14E-14 | 7.25E-14 | 7.47E-14 | 1.51E-01 | 5.37E-02 | 9.55E-01 |
| 222.15696 | 197.85 | 15.78 | 10.38 | 12.72 | 12.10 | 4.71E-23 | 4.43E-14 | 1.55E-09 | 3.20E-12 | 1.12E-05 | 3.19E-03 | 5.94E-01 |
| 222.3872  | 280.09 | 15.28 | 16.27 | 16.37 | 15.74 | 9.31E-06 | 2.10E-04 | 2.51E-05 | 2.25E-01 | 9.71E-01 | 1.47E-01 | 5.12E-02 |
| 222.50482 | 161.57 | 12.09 | 14.40 | 13.58 | 13.94 | 2.69E-03 | 2.01E-03 | 8.98E-02 | 2.61E-02 | 5.85E-01 | 9.04E-01 | 9.47E-01 |
| 222.5246  | 267.91 | 17.22 | 18.47 | 18.54 | 17.06 | 1.22E-14 | 5.45E-08 | 5.72E-09 | 8.75E-01 | 9.85E-01 | 6.37E-09 | 6.96E-10 |
| 222.6285  | 24.13  | 16.31 | 17.72 | 16.24 | 17.56 | 7.25E-09 | 5.50E-06 | 9.94E-01 | 1.20E-04 | 3.05E-06 | 9.47E-01 | 6.63E-05 |
| 222.64447 | 59.26  | 15.98 | 14.74 | 15.41 | 15.28 | 4.93E-03 | 1.74E-03 | 3.22E-01 | 1.91E-01 | 2.20E-01 | 4.25E-01 | 9.86E-01 |
| 222.86774 | 48.05  | 19.36 | 21.27 | 21.30 | 21.07 | 1.67E-21 | 7.43E-14 | 7.45E-14 | 2.35E-13 | 9.98E-01 | 7.84E-01 | 6.81E-01 |
| 222.94123 | 41.99  | 15.30 | 16.33 | 16.09 | 16.32 | 1.04E-05 | 5.18E-05 | 3.23E-03 | 9.81E-05 | 7.10E-01 | 1.00E+00 | 7.45E-01 |
| 222.96818 | 117.81 | 17.55 | 15.87 | 14.10 | 17.07 | 3.86E-16 | 1.42E-04 | 7.61E-14 | 6.31E-01 | 9.22E-05 | 2.03E-02 | 4.21E-11 |
| 222.97716 | 119.06 | 16.57 | 15.06 | 14.85 | 15.41 | 9.39E-14 | 3.64E-10 | 8.01E-13 | 3.08E-06 | 7.86E-01 | 4.49E-01 | 7.84E-02 |
| 222.98856 | 67.35  | 18.73 | 18.61 | 18.28 | 18.60 | 9.48E-02 | 9.27E-01 | 6.65E-02 | 9.03E-01 | 2.79E-01 | 1.00E+00 | 3.43E-01 |
| 223.00596 | 107.71 | 17.16 | 15.62 | 15.05 | 15.54 | 1.88E-07 | 2.47E-04 | 1.66E-07 | 1.73E-04 | 4.42E-01 | 9.98E-01 | 5.85E-01 |
| 223.02255 | 77.26  | 15.02 | 16.46 | 14.91 | 16.29 | 7.05E-05 | 2.48E-03 | 9.92E-01 | 1.31E-02 | 1.25E-03 | 9.78E-01 | 7.00E-03 |
| 223.03069 | 272.63 | 15.31 | 16.59 | 15.56 | 14.74 | 1.07E-01 | 2.88E-01 | 9.86E-01 | 8.61E-01 | 5.01E-01 | 7.29E-02 | 6.94E-01 |
| 223.06366 | 169.75 | 17.41 | 15.86 | 16.00 | 16.05 | 1.94E-20 | 7.35E-14 | 7.72E-14 | 2.66E-13 | 8.60E-01 | 7.09E-01 | 9.90E-01 |
| 223.07478 | 159.72 | 18.12 | 19.59 | 19.43 | 19.41 | 3.94E-11 | 1.11E-09 | 4.59E-08 | 2.48E-07 | 8.90E-01 | 8.52E-01 | 9.99E-01 |
| 223.08224 | 24.19  | 14.56 | 16.13 | 13.06 | 17.33 | 2.47E-30 | 4.03E-06 | 9.35E-06 | 7.74E-14 | 7.59E-14 | 1.53E-03 | 3.65E-14 |
| 223.09642 | 207.94 | 16.51 | 13.49 | 13.92 | 14.40 | 8.65E-28 | 3.76E-14 | 6.83E-14 | 1.44E-13 | 3.14E-01 | 3.23E-03 | 2.58E-01 |
| 223.10035 | 24.68  | 11.18 | 15.62 | 10.50 | 16.10 | 4.86E-35 | 7.25E-14 | 4.11E-01 | 6.16E-14 | 4.96E-14 | 7.34E-01 | 3.85E-14 |
| 223.10767 | 35.17  | 17.76 | 16.73 | 16.78 | 16.91 | 1.58E-06 | 1.08E-05 | 2.55E-05 | 7.04E-04 | 9.96E-01 | 8.35E-01 | 9.24E-01 |
| 223.1152  | 23.77  | 13.68 | 14.80 | 12.49 | 15.49 | 4.45E-16 | 3.78E-03 | 1.58E-03 | 8.24E-07 | 2.62E-10 | 1.83E-01 | 7.72E-14 |
| 223.11894 | 281.05 | 20.05 | 18.49 | 18.04 | 18.62 | 1.30E-10 | 1.01E-06 | 1.54E-10 | 1.54E-05 | 4.27E-01 | 9.74E-01 | 2.26E-01 |
| 223.13278 | 282.79 | 17.90 | 15.54 | 16.77 | 16.38 | 2.42E-09 | 4.45E-10 | 5.92E-03 | 1.46E-04 | 3.36E-03 | 1.03E-01 | 6.99E-01 |
| 223.13434 | 22.71  | 15.83 | 18.62 | 15.64 | 18.27 | 7.94E-23 | 7.69E-14 | 9.25E-01 | 1.19E-11 | 7.43E-14 | 7.29E-01 | 9.74E-13 |
| 223.16905 | 22.52  | 17.67 | 14.29 | 14.84 | 15.86 | 1.73E-56 | 3.65E-14 | 3.65E-14 | 6.03E-14 | 5.45E-03 | 7.61E-14 | 3.38E-08 |
| 223.16913 | 283.88 | 17.80 | 16.64 | 16.60 | 16.54 | 4.55E-09 | 1.62E-06 | 5.02E-07 | 3.35E-07 | 9.98E-01 | 9.71E-01 | 9.93E-01 |
| 223.20557 | 282.69 | 17.24 | 16.16 | 15.95 | 16.23 | 7.61E-08 | 2.03E-05 | 1.86E-07 | 1.13E-04 | 8.05E-01 | 9.93E-01 | 6.62E-01 |
| 223.20567 | 173.39 | 17.68 | 15.29 | 15.21 | 16.21 | 1.01E-28 | 4.65E-14 | 3.87E-14 | 3.34E-10 | 9.79E-01 | 2.43E-04 | 4.10E-05 |
| 223.50385 | 182.86 | 10.96 | 14.19 | 13.46 | 13.96 | 1.38E-06 | 5.77E-06 | 6.21E-04 | 4.82E-05 | 6.86E-01 | 9.87E-01 | 8.79E-01 |
| 223.52262 | 280.11 | 15.30 | 20.43 | 20.83 | 19.03 | 3.69E-35 | 3.65E-14 | 3.65E-14 | 7.34E-14 | 7.52E-01 | 5.91E-03 | 1.43E-04 |
| 223.53013 | 106.18 | 16.89 | 15.88 | 15.98 | 16.15 | 9.67E-04 | 1.49E-03 | 5.03E-03 | 4.15E-02 | 9.82E-01 | 7.91E-01 | 9.41E-01 |
| 223.56379 | 117.27 | 15.48 | 13.64 | 12.96 | 12.06 | 4.57E-07 | 1.06E-02 | 1.38E-04 | 2.94E-07 | 6.77E-01 | 5.96E-02 | 4.71E-01 |
| 223.63553 | 39.26  | 14.99 | 16.70 | 15.80 | 16.93 | 1.74E-07 | 1.09E-05 | 9.19E-02 | 9.78E-07 | 5.93E-02 | 9.28E-01 | 1.25E-02 |
| 223.94611 | 97.27  | 16.21 | 15.68 | 13.69 | 16.56 | 1.94E-29 | 7.38E-02 | 4.43E-14 | 4.21E-01 | 7.58E-14 | 1.14E-03 | 3.72E-14 |
| 223.95445 | 43.4   | 14.86 | 15.11 | 14.23 | 15.33 | 1.26E-03 | 7.94E-01 | 9.86E-02 | 3.38E-01 | 1.05E-02 | 8.74E-01 | 9.92E-04 |
| 223.96322 | 121.88 | 17.52 | 15.32 | 16.04 | 15.99 | 4.25E-22 | 5.67E-14 | 7.57E-12 | 9.05E-12 | 2.60E-03 | 8.19E-03 | 9.96E-01 |
| 223.97218 | 60.52  | 18.38 | 18.47 | 19.44 | 18.31 | 2.35E-09 | 9.62E-01 | 9.79E-08 | 9.81E-01 | 2.77E-06 | 8.41E-01 | 7.96E-08 |
| 223.98858 | 127.89 | 17.45 | 15.76 | 14.74 | 16.78 | 4.52E-15 | 1.20E-06 | 8.23E-14 | 1.64E-01 | 1.05E-02 | 1.33E-02 | 2.28E-08 |
| 224.00804 | 86.78  | 16.18 | 18.12 | 18.06 | 17.05 | 9.30E-23 | 7.34E-14 | 7.47E-14 | 9.31E-05 | 9.90E-01 | 2.27E-06 | 7.60E-06 |
| 224.01427 | 93.74  | 16.71 | 16.85 | 16.66 | 16.43 | 2.96E-01 | 9.07E-01 | 9.96E-01 | 5.46E-01 | 8.14E-01 | 2.21E-01 | 7.02E-01 |
| 224.01905 | 249.89 | 14.24 | 14.45 | 14.87 | 13.99 | 1.62E-01 | 9.51E-01 | 3.44E-01 | 9.17E-01 | 6.97E-01 | 6.71E-01 | 1.26E-01 |
| 224.02835 | 77.98  | 16.89 | 19.33 | 17.96 | 18.31 | 1.42E-23 | 3.94E-14 | 1.91E-06 | 7.44E-10 | 2.18E-09 | 2.31E-05 | 3.64E-01 |
| 224.04332 | 59.42  | 18.09 | 15.88 | 16.55 | 15.91 | 5.70E-29 | 3.90E-14 | 1.03E-13 | 4.65E-14 | 2.71E-03 | 9.98E-01 | 6.71E-03 |
| 224.05446 | 233.18 | 16.72 | 16.74 | 17.23 | 16.32 | 5.55E-03 | 1.00E+00 | 1.42E-01 | 3.61E-01 | 1.83E-01 | 3.60E-01 | 2.04E-03 |
| 224.05868 | 70.43  | 15.39 | 15.98 | 16.27 | 17.75 | 7.35E-18 | 5.33E-02 | 9.53E-04 | 7.28E-14 | 6.26E-01 | 5.49E-11 | 2.93E-08 |
| 224.07213 | 280.49 | 15.77 | 16.72 | 16.63 | 16.37 | 2.02E-09 | 1.25E-08 | 1.74E-07 | 8.23E-04 | 9.50E-01 | 1.40E-01 | 3.56E-01 |
| 224.07811 | 146.04 | 15.14 | 13.88 | 14.01 | 14.51 | 7.27E-06 | 1.70E-05 | 1.24E-04 | 9.33E-02 | 9.62E-01 | 1.08E-01 | 2.68E-01 |
| 224.0917  | 217.22 | 16.96 | 13.00 | 13.34 | 14.27 | 9.18E-25 | 5.74E-14 | 7.43E-14 | 2.62E-11 | 7.96E-01 | 5.39E-03 | 6.67E-02 |
| 224.10297 | 202.59 | 16.20 | 12.02 | 13.52 | 13.42 | 7.82E-25 | 3.87E-14 | 1.38E-12 | 1.28E-12 | 1.90E-04 | 9.68E-04 | 9.92E-01 |
| 224.10369 | 51.35  | 16.26 | 14.82 | 15.30 | 15.35 | 5.39E-04 | 2.30E-04 | 2.61E-02 | 4.87E-02 | 5.26E-01 | 4.74E-01 | 9.99E-01 |
| 224.11288 | 58.49  | 15.56 | 14.34 | 14.58 | 15.15 | 1.11E-02 | 1.19E-02 | 6.05E-02 | 7.32E-01 | 9.35E-01 | 2.21E-01 | 5.23E-01 |
| 224.11929 | 81.68  | 13.31 | 16.29 | 16.56 | 15.26 | 8.96E-22 | 7.52E-14 | 7.25E-14 | 6.34E-08 | 8.43E-01 | 1.32E-02 | 7.59E-04 |
| 224.12236 | 228.23 | 16.26 | 10.19 | 8.94  | 12.25 | 3.88E-26 | 7.49E-14 | 3.90E-14 | 7.62E-09 | 2.03E-01 | 9.74E-03 | 4.27E-06 |
| 224.12819 | 177.29 | 17.53 | 14.59 | 14.72 | 14.95 | 7.92E-43 | 3.65E-14 | 3.65E-14 | 3.65E-14 | 9.01E-01 | 2.77E-01 | 6.65E-01 |

|           |        |       |       |       |       |          |          |          |          |          |          |          |
|-----------|--------|-------|-------|-------|-------|----------|----------|----------|----------|----------|----------|----------|
| 224.15879 | 214.54 | 16.47 | 11.62 | 12.77 | 12.13 | 7.55E-18 | 7.38E-14 | 2.16E-10 | 9.20E-13 | 1.58E-01 | 8.04E-01 | 6.69E-01 |
| 224.16427 | 25.43  | 17.13 | 11.96 | 12.17 | 15.19 | 3.57E-26 | 6.16E-14 | 6.89E-14 | 5.14E-04 | 9.74E-01 | 4.62E-09 | 3.31E-08 |
| 224.16447 | 199.35 | 16.19 | 12.52 | 12.97 | 13.71 | 5.71E-19 | 7.47E-14 | 1.05E-13 | 1.18E-08 | 6.68E-01 | 2.03E-02 | 2.61E-01 |
| 224.5041  | 87.53  | 15.63 | 16.17 | 16.50 | 15.88 | 9.84E-05 | 2.85E-02 | 4.79E-05 | 5.65E-01 | 3.32E-01 | 5.11E-01 | 1.40E-02 |
| 224.51831 | 108.7  | 14.99 | 17.39 | 16.24 | 15.96 | 7.40E-12 | 6.60E-13 | 2.61E-04 | 1.12E-02 | 1.38E-03 | 6.80E-05 | 8.12E-01 |
| 224.55722 | 69.33  | 13.53 | 15.39 | 14.16 | 14.81 | 3.55E-04 | 2.15E-04 | 4.83E-01 | 2.65E-02 | 3.43E-02 | 6.01E-01 | 4.93E-01 |
| 224.57985 | 79.63  | 16.27 | 17.21 | 16.53 | 17.11 | 4.85E-06 | 2.88E-05 | 5.46E-01 | 3.39E-04 | 6.36E-03 | 9.69E-01 | 3.23E-02 |
| 224.60554 | 99.73  | 15.87 | 15.17 | 15.30 | 15.54 | 7.59E-03 | 6.77E-03 | 3.74E-02 | 4.38E-01 | 9.37E-01 | 3.62E-01 | 7.03E-01 |
| 224.86484 | 47.89  | 18.80 | 20.69 | 20.73 | 20.49 | 9.28E-21 | 7.43E-14 | 7.49E-14 | 5.36E-13 | 9.98E-01 | 8.05E-01 | 6.97E-01 |
| 224.95055 | 22.98  | 14.20 | 14.65 | 14.10 | 15.60 | 1.57E-10 | 1.63E-01 | 9.65E-01 | 5.42E-09 | 6.44E-02 | 1.90E-04 | 9.94E-10 |
| 224.95752 | 42.3   | 14.92 | 15.79 | 15.48 | 16.15 | 7.89E-05 | 5.53E-03 | 1.30E-01 | 4.08E-05 | 6.66E-01 | 5.53E-01 | 7.28E-02 |
| 224.96366 | 125    | 16.08 | 13.42 | 11.17 | 14.97 | 1.66E-21 | 1.21E-07 | 6.29E-14 | 8.50E-02 | 1.55E-05 | 8.58E-03 | 7.19E-13 |
| 224.98948 | 79.04  | 16.60 | 14.88 | 14.26 | 15.46 | 5.40E-12 | 3.57E-07 | 2.78E-12 | 2.24E-03 | 2.03E-01 | 2.70E-01 | 1.29E-03 |
| 225.01567 | 273.48 | 19.60 | 21.89 | 21.85 | 21.60 | 2.60E-16 | 3.23E-13 | 5.42E-13 | 3.90E-10 | 9.98E-01 | 7.64E-01 | 8.46E-01 |
| 225.02061 | 292.92 | 14.60 | 15.05 | 15.39 | 14.12 | 3.73E-03 | 5.60E-01 | 9.74E-02 | 5.08E-01 | 7.70E-01 | 5.13E-02 | 2.71E-03 |
| 225.03617 | 67.48  | 19.86 | 18.94 | 19.16 | 18.66 | 3.20E-11 | 2.17E-07 | 1.04E-04 | 4.15E-11 | 5.45E-01 | 3.61E-01 | 1.85E-02 |
| 225.04662 | 63.69  | 21.93 | 20.84 | 21.31 | 20.53 | 3.68E-14 | 1.97E-09 | 1.06E-03 | 2.07E-13 | 3.23E-02 | 3.18E-01 | 9.30E-05 |
| 225.05328 | 46.78  | 17.03 | 20.49 | 16.32 | 16.49 | 3.46E-60 | 3.65E-14 | 1.54E-03 | 3.53E-02 | 3.65E-14 | 3.65E-14 | 8.38E-01 |
| 225.07961 | 24.27  | 14.97 | 14.66 | 12.87 | 16.28 | 4.74E-19 | 7.48E-01 | 5.33E-10 | 3.92E-04 | 3.58E-07 | 1.18E-05 | 7.07E-14 |
| 225.08701 | 204.33 | 16.93 | 12.65 | 13.21 | 14.20 | 4.11E-25 | 4.81E-14 | 7.56E-14 | 1.04E-10 | 4.56E-01 | 7.22E-04 | 6.26E-02 |
| 225.09098 | 171.87 | 17.35 | 15.08 | 15.20 | 15.61 | 4.93E-22 | 7.47E-14 | 7.38E-14 | 1.01E-11 | 9.52E-01 | 1.20E-01 | 3.12E-01 |
| 225.09823 | 93.74  | 14.10 | 15.31 | 14.98 | 15.24 | 2.14E-01 | 2.33E-01 | 5.06E-01 | 3.04E-01 | 9.58E-01 | 1.00E+00 | 9.80E-01 |
| 225.11211 | 178.5  | 17.09 | 15.20 | 14.92 | 15.66 | 2.16E-31 | 4.63E-14 | 3.65E-14 | 9.97E-14 | 3.40E-01 | 4.33E-02 | 1.50E-04 |
| 225.12326 | 232.75 | 18.04 | 19.40 | 19.39 | 18.76 | 1.12E-08 | 2.23E-07 | 1.97E-07 | 1.73E-02 | 1.00E+00 | 6.14E-02 | 6.25E-02 |
| 225.14834 | 286.05 | 18.09 | 16.60 | 16.67 | 16.85 | 3.25E-13 | 3.56E-11 | 1.82E-10 | 7.80E-08 | 9.87E-01 | 6.62E-01 | 8.40E-01 |
| 225.14837 | 23.18  | 17.31 | 14.29 | 14.89 | 15.22 | 1.88E-51 | 3.65E-14 | 3.65E-14 | 3.65E-14 | 1.05E-03 | 2.19E-07 | 1.75E-01 |
| 225.1847  | 287.42 | 17.43 | 16.41 | 16.12 | 16.46 | 1.17E-08 | 1.69E-05 | 1.43E-08 | 7.25E-05 | 5.45E-01 | 9.97E-01 | 4.39E-01 |
| 225.18481 | 20.82  | 16.93 | 12.85 | 13.64 | 14.53 | 1.40E-71 | 3.65E-14 | 3.65E-14 | 3.65E-14 | 5.61E-06 | 7.16E-14 | 5.95E-07 |
| 225.19599 | 283.84 | 18.27 | 17.09 | 17.02 | 17.00 | 8.86E-13 | 4.74E-09 | 4.25E-10 | 8.33E-10 | 9.85E-01 | 9.68E-01 | 9.99E-01 |
| 225.22112 | 287.25 | 18.56 | 17.06 | 16.93 | 17.03 | 1.34E-10 | 1.35E-07 | 6.04E-09 | 1.67E-07 | 9.57E-01 | 1.00E+00 | 9.80E-01 |
| 225.53346 | 286.43 | 14.75 | 13.67 | 14.90 | 11.63 | 9.24E-11 | 9.59E-02 | 9.87E-01 | 2.45E-09 | 4.95E-02 | 2.76E-04 | 9.43E-10 |
| 225.55614 | 26.49  | 16.42 | 18.24 | 15.43 | 15.42 | 1.83E-76 | 3.65E-14 | 7.36E-14 | 7.36E-14 | 3.65E-14 | 3.65E-14 | 1.00E+00 |
| 225.61167 | 27.05  | 17.01 | 19.27 | 18.55 | 20.70 | 4.35E-38 | 7.25E-14 | 1.26E-10 | 3.65E-14 | 8.23E-03 | 2.38E-08 | 7.32E-14 |
| 225.90074 | 127.58 | 15.69 | 15.97 | 17.46 | 15.10 | 8.84E-15 | 7.09E-01 | 5.79E-10 | 1.25E-01 | 5.28E-07 | 1.00E-02 | 8.56E-14 |
| 225.97005 | 44.97  | 20.75 | 20.41 | 20.65 | 20.52 | 1.74E-02 | 1.33E-02 | 8.00E-01 | 1.74E-01 | 1.55E-01 | 8.03E-01 | 6.64E-01 |
| 225.97895 | 111.17 | 18.00 | 15.52 | 16.44 | 16.46 | 2.71E-37 | 3.65E-14 | 7.32E-14 | 7.41E-14 | 1.08E-07 | 1.56E-07 | 9.99E-01 |
| 225.99202 | 259.47 | 14.79 | 12.74 | 11.54 | 12.27 | 1.39E-06 | 4.29E-03 | 8.26E-07 | 3.66E-04 | 2.16E-01 | 8.83E-01 | 6.60E-01 |
| 225.99435 | 37.14  | 16.21 | 16.55 | 16.67 | 16.63 | 6.56E-02 | 2.73E-01 | 6.92E-02 | 1.44E-01 | 9.27E-01 | 9.83E-01 | 9.96E-01 |
| 226.01904 | 277.13 | 15.33 | 16.36 | 16.29 | 16.34 | 3.63E-02 | 6.70E-02 | 9.64E-02 | 8.62E-02 | 9.98E-01 | 1.00E+00 | 9.99E-01 |
| 226.0239  | 57.91  | 18.39 | 18.24 | 18.98 | 18.60 | 2.51E-05 | 7.41E-01 | 6.97E-04 | 5.41E-01 | 1.93E-05 | 1.12E-01 | 8.29E-02 |
| 226.04495 | 48.91  | 20.63 | 21.13 | 21.47 | 21.55 | 4.51E-10 | 3.15E-03 | 4.20E-08 | 6.25E-09 | 7.81E-02 | 2.27E-02 | 9.47E-01 |
| 226.05011 | 90.83  | 17.38 | 16.06 | 16.41 | 16.74 | 2.40E-05 | 1.19E-05 | 2.23E-03 | 9.85E-02 | 5.72E-01 | 8.59E-02 | 6.68E-01 |
| 226.06695 | 80.47  | 17.51 | 14.36 | 14.39 | 14.50 | 8.16E-22 | 7.47E-14 | 7.52E-14 | 7.69E-14 | 1.00E+00 | 9.77E-01 | 9.90E-01 |
| 226.07087 | 281.07 | 20.12 | 17.92 | 17.21 | 18.21 | 1.03E-16 | 2.61E-10 | 7.48E-14 | 9.05E-08 | 1.28E-01 | 8.29E-01 | 1.58E-02 |
| 226.07443 | 89.99  | 16.10 | 12.66 | 16.26 | 19.21 | 3.68E-78 | 3.65E-14 | 8.34E-01 | 3.65E-14 | 3.65E-14 | 3.65E-14 | 3.65E-14 |
| 226.08123 | 48.32  | 16.84 | 13.36 | 13.65 | 14.56 | 1.51E-10 | 1.43E-09 | 2.18E-08 | 1.86E-04 | 9.49E-01 | 1.39E-01 | 3.54E-01 |
| 226.08204 | 139    | 15.08 | 12.79 | 13.17 | 13.82 | 5.02E-04 | 4.81E-04 | 4.76E-03 | 1.41E-01 | 9.16E-01 | 3.25E-01 | 6.99E-01 |
| 226.10722 | 182.71 | 17.98 | 11.51 | 12.59 | 14.47 | 1.52E-65 | 3.65E-14 | 3.65E-14 | 3.67E-14 | 6.42E-04 | 7.07E-14 | 1.36E-09 |
| 226.10727 | 277.46 | 17.30 | 11.65 | 12.77 | 14.63 | 1.83E-52 | 3.65E-14 | 3.65E-14 | 7.32E-14 | 8.74E-04 | 7.28E-14 | 1.10E-08 |
| 226.11322 | 27.07  | 15.66 | 16.24 | 15.83 | 18.28 | 1.65E-09 | 4.75E-01 | 9.75E-01 | 5.07E-09 | 7.49E-01 | 1.34E-05 | 9.26E-08 |
| 226.14374 | 189.16 | 17.16 | 13.94 | 14.42 | 14.87 | 3.04E-38 | 3.65E-14 | 3.65E-14 | 6.85E-14 | 1.22E-01 | 2.46E-04 | 1.73E-01 |
| 226.15496 | 35.66  | 13.52 | 21.63 | 13.55 | 14.44 | 7.34E-36 | 3.65E-14 | 1.00E+00 | 4.20E-01 | 3.65E-14 | 4.36E-14 | 4.72E-01 |
| 226.15891 | 273.75 | 19.04 | 17.89 | 17.58 | 17.63 | 7.80E-09 | 4.69E-05 | 8.22E-08 | 7.06E-07 | 6.04E-01 | 7.57E-01 | 9.97E-01 |
| 226.17998 | 22.22  | 16.89 | 15.38 | 14.39 | 15.65 | 2.40E-11 | 3.66E-05 | 2.61E-12 | 1.62E-03 | 1.91E-02 | 8.54E-01 | 1.71E-03 |
| 226.18014 | 190.58 | 17.29 | 14.82 | 14.78 | 15.44 | 5.00E-36 | 3.65E-14 | 3.65E-14 | 7.44E-14 | 9.96E-01 | 8.86E-03 | 4.05E-03 |
| 226.2165  | 200.11 | 16.26 | 13.05 | 14.10 | 14.13 | 2.94E-24 | 4.07E-14 | 3.92E-13 | 3.67E-12 | 1.14E-03 | 1.21E-03 | 1.00E+00 |
| 226.22459 | 204.73 | 15.97 | 9.37  | 12.49 | 12.28 | 1.09E-21 | 4.85E-14 | 3.44E-08 | 1.59E-08 | 2.07E-06 | 2.27E-05 | 9.86E-01 |
| 226.50076 | 305.55 | 11.84 | 17.75 | 15.90 | 14.61 | 1.65E-50 | 3.65E-14 | 3.65E-14 | 7.52E-14 | 2.33E-08 | 7.29E-14 | 2.22E-04 |
| 226.55194 | 112.04 | 13.09 | 14.43 | 14.49 | 15.21 | 8.67E-06 | 5.65E-03 | 3.06E-03 | 3.68E-06 | 9.99E-01 | 2.59E-01 | 3.20E-01 |
| 226.57752 | 64.38  | 15.20 | 14.64 | 14.69 | 14.96 | 6.57E-01 | 6.78E-01 | 7.27E-01 | 9.66E-01 | 1.00E+00 | 9.31E-01 | 9.54E-01 |
| 226.86196 | 48.19  | 16.92 | 17.93 | 17.99 | 17.85 | 5.92E-11 | 2.31E-08 | 2.14E-09 | 6.61E-07 | 9.84E-01 | 9.64E-01 | 8.39E-01 |
| 226.94021 | 85.2   | 19.35 | 13.75 | 13.86 | 16.41 | 3.29E-41 | 3.65E-14 | 3.65E-14 | 1.69E-12 | 9.90E-01 | 4.76E-10 | 1.92E-09 |
| 226.95141 | 48.07  | 21.92 | 21.61 | 21.59 | 22.03 | 3.51E-02 | 2.83E-01 | 2.30E-01 | 9.25E-01 | 1.00E+00 | 1.04E-01 | 7.95E-02 |
| 226.96274 | 264.75 | 18.07 | 17.19 | 17.70 | 17.97 | 1.97E-05 | 1.65E-05 | 1.70E-01 | 9.45E-01 | 3.66E-02 | 4.88E-04 | 5.01E-01 |
| 226.97253 | 29.38  | 16.50 | 16.14 | 16.51 | 16.02 | 4.71E-03 | 1.14E-01 | 1.00E+00 | 2.04E-02 | 1.12E-01 | 8.96E-01 | 2.06E-02 |
| 226.9868  | 21.98  | 14.54 | 17.01 | 16.89 | 16.45 | 2.29E-32 | 3.67E-14 | 3.72E-14 | 7.44E-14 | 9.36E-01 | 3.45E-02 | 1.32E-01 |
| 226.99346 | 32.12  | 14.95 | 13.67 | 15.13 | 13.48 | 5.31E-08 | 4.13E-04 | 9.36E-01 | 6.17E-05 | 5.96E-05 | 9.47E-01 | 8.27E-06 |
| 227.02693 | 70.79  | 17.82 | 12.44 | 13.74 | 14.42 | 1.56E-21 | 6.41E-14 | 1.64E-13 | 1.38E-09 | 5.50E-02 | 1.32E-03 | 5.73E-01 |

|           |        |       |       |       |       |           |          |          |          |          |          |          |
|-----------|--------|-------|-------|-------|-------|-----------|----------|----------|----------|----------|----------|----------|
| 227.03383 | 88.9   | 17.54 | 15.99 | 17.58 | 16.40 | 1.34E-20  | 7.45E-14 | 9.93E-01 | 7.79E-09 | 7.61E-14 | 1.18E-01 | 4.26E-09 |
| 227.04194 | 49.8   | 21.05 | 22.02 | 22.04 | 21.77 | 6.13E-06  | 4.94E-05 | 2.80E-05 | 5.79E-03 | 1.00E+00 | 6.95E-01 | 6.38E-01 |
| 227.0485  | 55.58  | 18.45 | 18.24 | 18.12 | 18.71 | 2.21E-03  | 4.96E-01 | 1.28E-01 | 3.69E-01 | 8.77E-01 | 2.13E-02 | 1.82E-03 |
| 227.06595 | 174.7  | 13.15 | 16.75 | 16.23 | 15.81 | 1.07E-11  | 7.07E-11 | 1.76E-08 | 3.24E-06 | 7.45E-01 | 2.96E-01 | 8.58E-01 |
| 227.10249 | 285.1  | 18.83 | 16.67 | 16.55 | 16.78 | 1.99E-24  | 7.42E-14 | 7.01E-14 | 7.49E-14 | 9.53E-01 | 9.64E-01 | 7.53E-01 |
| 227.11392 | 72.32  | 18.95 | 20.48 | 20.19 | 19.96 | 2.33E-19  | 7.37E-14 | 3.18E-13 | 7.03E-09 | 2.55E-01 | 8.72E-03 | 4.89E-01 |
| 227.12655 | 25.38  | 17.36 | 13.29 | 13.93 | 14.95 | 5.00E-57  | 3.65E-14 | 3.65E-14 | 3.76E-14 | 7.66E-03 | 2.27E-13 | 4.84E-06 |
| 227.12769 | 288.68 | 17.85 | 16.65 | 16.73 | 16.47 | 7.28E-12  | 1.62E-08 | 9.34E-08 | 2.49E-10 | 9.82E-01 | 8.18E-01 | 5.96E-01 |
| 227.13888 | 23.08  | 15.98 | 17.39 | 13.08 | 12.73 | 3.16E-47  | 2.87E-06 | 6.43E-14 | 4.21E-14 | 3.65E-14 | 3.65E-14 | 6.03E-01 |
| 227.13903 | 214.77 | 16.49 | 16.55 | 15.20 | 14.85 | 1.73E-13  | 9.94E-01 | 1.05E-06 | 1.52E-09 | 7.39E-07 | 1.24E-09 | 5.07E-01 |
| 227.15826 | 27.58  | 16.41 | 17.79 | 15.26 | 15.28 | 5.23E-82  | 3.65E-14 | 3.65E-14 | 3.67E-14 | 3.65E-14 | 3.65E-14 | 9.96E-01 |
| 227.16404 | 270.25 | 17.34 | 15.29 | 15.36 | 15.99 | 3.56E-22  | 7.32E-14 | 7.37E-14 | 4.23E-09 | 9.88E-01 | 6.91E-03 | 1.70E-02 |
| 227.17539 | 163.33 | 17.02 | 16.22 | 16.77 | 16.05 | 4.78E-09  | 6.38E-06 | 3.76E-01 | 6.75E-08 | 5.32E-03 | 7.42E-01 | 1.60E-04 |
| 227.17556 | 286.83 | 16.55 | 16.02 | 16.07 | 15.12 | 3.55E-07  | 1.01E-01 | 1.55E-01 | 5.33E-08 | 9.97E-01 | 2.03E-03 | 8.55E-04 |
| 227.17769 | 20.56  | 17.33 | 13.05 | 14.47 | 15.76 | 6.60E-32  | 3.65E-14 | 7.58E-14 | 5.54E-06 | 4.50E-05 | 9.87E-14 | 3.95E-04 |
| 227.20044 | 276.54 | 18.22 | 16.56 | 16.34 | 16.82 | 7.77E-15  | 7.54E-11 | 1.95E-13 | 8.69E-08 | 7.79E-01 | 7.22E-01 | 1.98E-01 |
| 227.51418 | 85.77  | 15.29 | 15.62 | 16.16 | 15.27 | 9.97E-04  | 4.98E-01 | 1.72E-03 | 1.00E+00 | 1.32E-01 | 5.15E-01 | 2.97E-03 |
| 227.54398 | 26.68  | 16.54 | 19.82 | 15.76 | 15.66 | 2.23E-119 | 3.65E-14 | 7.74E-14 | 7.54E-14 | 3.65E-14 | 3.65E-14 | 7.04E-01 |
| 227.56682 | 59.57  | 16.95 | 15.20 | 16.85 | 16.21 | 4.98E-10  | 2.17E-09 | 9.77E-01 | 3.51E-02 | 4.36E-08 | 2.50E-03 | 1.07E-01 |
| 227.63424 | 21.47  | 16.05 | 10.00 | 10.60 | 11.30 | 5.07E-86  | 3.65E-14 | 3.65E-14 | 3.65E-14 | 1.90E-02 | 2.64E-08 | 6.22E-03 |
| 227.94437 | 51.37  | 19.47 | 21.31 | 21.44 | 20.90 | 4.99E-24  | 7.49E-14 | 6.43E-14 | 6.31E-12 | 9.15E-01 | 1.47E-01 | 2.98E-02 |
| 227.95472 | 55.07  | 17.22 | 16.22 | 15.74 | 16.33 | 6.15E-06  | 2.68E-03 | 1.90E-06 | 1.29E-02 | 3.59E-01 | 9.82E-01 | 2.00E-01 |
| 227.96825 | 44.7   | 18.38 | 17.78 | 18.12 | 18.28 | 1.02E-04  | 6.20E-05 | 2.18E-01 | 8.98E-01 | 5.72E-02 | 2.34E-03 | 6.65E-01 |
| 228.00583 | 35.88  | 16.14 | 9.79  | 10.10 | 11.03 | 3.13E-62  | 3.65E-14 | 3.65E-14 | 3.65E-14 | 7.40E-01 | 6.13E-04 | 1.64E-02 |
| 228.021   | 52.29  | 17.37 | 14.91 | 15.81 | 15.08 | 1.57E-08  | 7.69E-08 | 1.12E-03 | 1.19E-06 | 1.54E-01 | 9.82E-01 | 3.39E-01 |
| 228.0292  | 34.91  | 11.74 | 12.87 | 15.87 | 15.48 | 1.03E-11  | 2.58E-01 | 6.23E-10 | 6.83E-08 | 1.99E-05 | 4.72E-04 | 9.31E-01 |
| 228.03809 | 91.04  | 14.08 | 16.12 | 16.15 | 16.26 | 1.15E-12  | 3.05E-09 | 1.32E-09 | 6.93E-10 | 1.00E+00 | 9.76E-01 | 9.87E-01 |
| 228.04537 | 48.86  | 17.92 | 18.24 | 18.27 | 18.31 | 8.12E-02  | 2.31E-01 | 1.52E-01 | 1.07E-01 | 9.98E-01 | 9.76E-01 | 9.96E-01 |
| 228.05735 | 110.66 | 17.01 | 14.36 | 14.28 | 15.02 | 1.21E-34  | 3.65E-14 | 3.65E-14 | 7.45E-14 | 9.76E-01 | 1.29E-02 | 3.20E-03 |
| 228.08019 | 59.49  | 16.33 | 14.48 | 15.24 | 15.04 | 6.50E-05  | 2.46E-05 | 2.85E-02 | 8.62E-03 | 2.29E-01 | 5.25E-01 | 9.62E-01 |
| 228.08648 | 281.38 | 21.59 | 20.29 | 19.67 | 20.40 | 2.46E-08  | 1.75E-04 | 6.63E-09 | 1.05E-03 | 1.93E-01 | 9.87E-01 | 1.04E-01 |
| 228.08665 | 180.7  | 21.06 | 18.96 | 18.35 | 19.74 | 1.04E-11  | 1.74E-07 | 9.68E-12 | 2.88E-03 | 3.64E-01 | 1.85E-01 | 2.03E-03 |
| 228.09791 | 102.2  | 17.08 | 16.83 | 17.34 | 16.63 | 9.32E-04  | 4.80E-01 | 4.14E-01 | 6.06E-02 | 2.18E-02 | 7.00E-01 | 6.98E-04 |
| 228.12289 | 288.53 | 17.54 | 16.22 | 16.23 | 16.17 | 6.74E-11  | 3.09E-08 | 2.97E-08 | 2.48E-08 | 1.00E+00 | 9.98E-01 | 9.95E-01 |
| 228.15939 | 154.98 | 17.27 | 15.46 | 15.60 | 15.87 | 9.74E-27  | 4.72E-14 | 6.69E-14 | 8.16E-14 | 8.28E-01 | 7.66E-02 | 3.78E-01 |
| 228.17064 | 56.97  | 16.87 | 16.73 | 16.47 | 16.58 | 5.76E-02  | 8.11E-01 | 4.55E-02 | 2.56E-01 | 3.41E-01 | 7.79E-01 | 9.07E-01 |
| 228.19552 | 24.97  | 15.09 | 13.50 | 11.37 | 13.37 | 2.72E-07  | 5.17E-02 | 3.25E-08 | 3.68E-02 | 5.08E-03 | 9.98E-01 | 1.22E-02 |
| 228.232   | 283.2  | 19.58 | 18.88 | 18.65 | 18.97 | 8.85E-03  | 6.42E-02 | 5.86E-03 | 1.52E-01 | 8.66E-01 | 9.90E-01 | 7.13E-01 |
| 228.46426 | 113.58 | 16.39 | 12.14 | 15.11 | 13.48 | 1.67E-14  | 1.02E-13 | 5.15E-02 | 3.14E-07 | 1.80E-07 | 6.18E-02 | 1.25E-02 |
| 228.48157 | 85.85  | 12.99 | 15.06 | 15.68 | 14.68 | 1.50E-08  | 1.72E-05 | 9.78E-09 | 9.86E-04 | 5.00E-01 | 8.40E-01 | 1.25E-01 |
| 228.55942 | 82.07  | 15.59 | 17.08 | 15.34 | 16.64 | 3.66E-10  | 6.75E-07 | 7.99E-01 | 1.18E-03 | 1.35E-08 | 4.26E-01 | 5.27E-05 |
| 228.62154 | 24.86  | 14.32 | 17.86 | 14.31 | 17.09 | 7.25E-27  | 7.18E-14 | 1.00E+00 | 5.96E-13 | 7.41E-14 | 1.38E-01 | 1.39E-12 |
| 228.66263 | 57.59  | 15.88 | 14.57 | 15.86 | 14.43 | 4.79E-03  | 5.46E-02 | 1.00E+00 | 3.14E-02 | 6.97E-02 | 9.93E-01 | 4.09E-02 |
| 228.81282 | 49.31  | 17.75 | 18.07 | 18.16 | 17.86 | 7.38E-04  | 1.72E-02 | 1.03E-03 | 7.56E-01 | 8.62E-01 | 2.54E-01 | 4.50E-02 |
| 228.86533 | 117.95 | 16.31 | 8.73  | 12.21 | 11.42 | 1.28E-34  | 3.65E-14 | 1.13E-13 | 7.49E-14 | 4.12E-10 | 3.74E-06 | 4.30E-01 |
| 228.90675 | 43.43  | 16.42 | 19.36 | 19.08 | 18.53 | 4.79E-51  | 3.65E-14 | 3.65E-14 | 3.65E-14 | 2.97E-01 | 8.12E-06 | 6.27E-03 |
| 228.94776 | 49.72  | 14.49 | 14.00 | 14.28 | 14.53 | 1.84E-01  | 2.27E-01 | 8.53E-01 | 9.99E-01 | 6.97E-01 | 2.11E-01 | 8.03E-01 |
| 228.95303 | 43.71  | 20.87 | 22.07 | 21.89 | 22.73 | 2.77E-24  | 6.63E-13 | 6.30E-10 | 3.92E-14 | 6.31E-01 | 3.44E-04 | 1.71E-06 |
| 228.96196 | 93.68  | 16.71 | 15.07 | 15.02 | 15.59 | 1.76E-07  | 3.14E-06 | 1.03E-06 | 3.84E-03 | 9.98E-01 | 4.12E-01 | 3.11E-01 |
| 228.97331 | 49.58  | 18.76 | 17.91 | 18.79 | 18.36 | 2.34E-08  | 3.90E-07 | 9.95E-01 | 5.57E-02 | 2.34E-07 | 7.72E-02 | 3.55E-02 |
| 228.97845 | 259.02 | 18.47 | 17.14 | 17.09 | 17.15 | 8.59E-09  | 1.26E-06 | 3.21E-07 | 2.79E-06 | 9.96E-01 | 1.00E+00 | 9.95E-01 |
| 228.99063 | 69.37  | 17.34 | 13.60 | 14.38 | 15.92 | 6.16E-21  | 7.28E-14 | 1.91E-13 | 1.03E-03 | 1.51E-01 | 4.13E-08 | 4.69E-04 |
| 228.99591 | 86.57  | 15.46 | 16.04 | 15.96 | 15.95 | 5.23E-02  | 6.30E-02 | 1.30E-01 | 1.73E-01 | 9.88E-01 | 9.82E-01 | 1.00E+00 |
| 229.00991 | 97.63  | 17.90 | 12.28 | 13.55 | 13.21 | 6.04E-54  | 3.65E-14 | 3.65E-14 | 3.65E-14 | 1.06E-04 | 1.08E-02 | 6.73E-01 |
| 229.01815 | 66.13  | 16.30 | 10.81 | 13.92 | 12.05 | 2.70E-20  | 7.14E-14 | 6.04E-05 | 1.64E-12 | 2.29E-07 | 1.30E-01 | 5.16E-03 |
| 229.02291 | 84.22  | 14.72 | 16.05 | 16.19 | 16.02 | 1.34E-05  | 3.69E-04 | 5.20E-05 | 7.80E-04 | 9.75E-01 | 1.00E+00 | 9.60E-01 |
| 229.05326 | 93.84  | 15.57 | 15.95 | 16.40 | 16.28 | 1.57E-06  | 8.08E-02 | 2.43E-06 | 1.23E-04 | 3.61E-02 | 2.10E-01 | 9.06E-01 |
| 229.08894 | 270.76 | 18.19 | 15.59 | 16.33 | 15.96 | 4.50E-23  | 6.34E-14 | 1.34E-12 | 7.43E-14 | 1.54E-02 | 4.68E-01 | 4.57E-01 |
| 229.10703 | 208.36 | 15.11 | 12.13 | 12.49 | 13.28 | 8.64E-08  | 2.25E-07 | 5.13E-06 | 4.18E-03 | 9.09E-01 | 1.65E-01 | 4.76E-01 |
| 229.11816 | 272.66 | 20.97 | 19.29 | 18.50 | 19.51 | 2.98E-15  | 3.45E-08 | 7.45E-14 | 3.85E-06 | 2.90E-02 | 8.74E-01 | 3.30E-03 |
| 229.12951 | 64.27  | 17.71 | 17.94 | 18.23 | 17.64 | 2.38E-03  | 4.90E-01 | 7.80E-03 | 9.75E-01 | 3.07E-01 | 3.01E-01 | 3.63E-03 |
| 229.14328 | 286.13 | 18.09 | 16.37 | 16.30 | 15.98 | 1.09E-15  | 3.43E-10 | 4.24E-11 | 1.81E-13 | 9.92E-01 | 4.65E-01 | 6.30E-01 |
| 229.15459 | 49.98  | 22.96 | 22.69 | 22.73 | 22.84 | 5.89E-02  | 6.06E-02 | 1.28E-01 | 6.63E-01 | 9.87E-01 | 5.87E-01 | 7.77E-01 |
| 229.15858 | 192.64 | 16.34 | 11.30 | 12.48 | 13.12 | 3.66E-30  | 3.65E-14 | 7.27E-14 | 1.31E-13 | 1.39E-02 | 4.75E-05 | 3.58E-01 |
| 229.1798  | 188.77 | 16.25 | 13.16 | 13.80 | 14.09 | 6.56E-11  | 1.21E-10 | 2.61E-07 | 1.54E-05 | 4.91E-01 | 1.91E-01 | 9.20E-01 |
| 229.19484 | 24.17  | 16.96 | 12.57 | 13.68 | 14.93 | 2.72E-32  | 3.65E-14 | 6.96E-14 | 7.10E-09 | 3.15E-03 | 7.32E-11 | 1.06E-03 |
| 229.2355  | 215.05 | 16.78 | 14.57 | 14.79 | 15.29 | 1.07E-29  | 3.70E-14 | 4.81E-14 | 1.55E-13 | 6.22E-01 | 9.36E-04 | 3.84E-02 |
| 229.58964 | 99.44  | 15.22 | 15.99 | 16.66 | 16.31 | 2.57E-03  | 2.01E-01 | 1.42E-03 | 3.69E-02 | 3.41E-01 | 8.74E-01 | 8.21E-01 |

|           |        |       |       |       |       |          |          |          |          |          |          |          |
|-----------|--------|-------|-------|-------|-------|----------|----------|----------|----------|----------|----------|----------|
| 229.63226 | 23.81  | 14.99 | 16.34 | 14.11 | 16.59 | 8.69E-10 | 3.16E-03 | 9.84E-02 | 4.27E-04 | 2.91E-07 | 9.28E-01 | 2.39E-08 |
| 229.90644 | 108.06 | 16.47 | 14.11 | 13.16 | 15.03 | 4.72E-11 | 2.65E-06 | 2.17E-11 | 1.23E-02 | 1.78E-01 | 2.19E-01 | 6.53E-04 |
| 229.92856 | 44.18  | 17.51 | 19.51 | 18.99 | 18.76 | 3.91E-13 | 3.50E-13 | 4.14E-08 | 9.57E-06 | 1.75E-01 | 2.53E-02 | 8.22E-01 |
| 229.94107 | 24.91  | 19.18 | 20.19 | 20.35 | 19.91 | 1.62E-15 | 2.67E-11 | 8.60E-14 | 3.13E-06 | 6.69E-01 | 2.28E-01 | 1.45E-02 |
| 229.94954 | 42.11  | 14.26 | 13.85 | 13.38 | 15.08 | 3.94E-04 | 6.96E-01 | 9.30E-02 | 1.54E-01 | 6.30E-01 | 1.28E-02 | 1.74E-04 |
| 229.95587 | 41.68  | 16.81 | 17.18 | 16.85 | 18.01 | 8.36E-13 | 8.50E-02 | 9.92E-01 | 6.74E-12 | 1.76E-01 | 4.80E-06 | 9.33E-11 |
| 229.97307 | 100.46 | 15.02 | 15.81 | 16.37 | 15.38 | 3.33E-04 | 6.86E-02 | 1.67E-04 | 6.90E-01 | 3.12E-01 | 5.89E-01 | 1.80E-02 |
| 229.97459 | 35.48  | 19.51 | 10.28 | 12.88 | 15.89 | 1.28E-61 | 3.65E-14 | 3.65E-14 | 7.54E-14 | 4.24E-09 | 3.65E-14 | 3.81E-11 |
| 229.98026 | 63.3   | 18.78 | 16.83 | 18.59 | 17.45 | 2.66E-14 | 2.44E-12 | 8.86E-01 | 3.91E-06 | 4.69E-10 | 9.48E-02 | 1.37E-04 |
| 230.0015  | 55.91  | 13.90 | 10.60 | 17.58 | 14.99 | 2.24E-38 | 4.08E-13 | 7.43E-14 | 4.89E-02 | 3.65E-14 | 7.49E-14 | 4.46E-08 |
| 230.02982 | 54.06  | 17.05 | 15.57 | 18.38 | 16.26 | 2.30E-20 | 2.44E-07 | 4.09E-06 | 1.80E-02 | 7.07E-14 | 6.21E-02 | 2.56E-12 |
| 230.03637 | 57.63  | 14.76 | 14.93 | 14.64 | 14.72 | 9.65E-01 | 9.89E-01 | 9.96E-01 | 1.00E+00 | 9.56E-01 | 9.85E-01 | 9.99E-01 |
| 230.0446  | 75.66  | 16.17 | 16.83 | 16.72 | 16.89 | 8.27E-03 | 2.50E-02 | 7.56E-02 | 1.37E-02 | 9.73E-01 | 9.93E-01 | 9.00E-01 |
| 230.05124 | 55.54  | 18.50 | 17.17 | 16.79 | 15.43 | 2.02E-19 | 2.76E-05 | 2.43E-08 | 6.81E-14 | 5.37E-01 | 1.20E-07 | 4.90E-05 |
| 230.05516 | 82.77  | 15.74 | 16.43 | 16.53 | 16.83 | 2.16E-04 | 2.59E-02 | 7.53E-03 | 1.38E-04 | 9.83E-01 | 4.31E-01 | 6.48E-01 |
| 230.06704 | 219.37 | 16.04 | 13.25 | 12.51 | 12.91 | 7.66E-11 | 1.51E-06 | 6.26E-10 | 1.29E-07 | 5.21E-01 | 9.30E-01 | 8.88E-01 |
| 230.07872 | 73.05  | 16.37 | 16.01 | 16.16 | 15.52 | 1.04E-02 | 4.60E-01 | 8.14E-01 | 5.09E-03 | 9.39E-01 | 2.44E-01 | 7.09E-02 |
| 230.086   | 105.27 | 13.34 | 13.26 | 14.89 | 14.27 | 2.29E-02 | 9.99E-01 | 4.64E-02 | 4.29E-01 | 4.11E-02 | 3.81E-01 | 7.58E-01 |
| 230.09578 | 68.66  | 23.91 | 24.34 | 24.80 | 24.39 | 3.17E-08 | 1.17E-02 | 3.42E-09 | 4.55E-03 | 7.32E-03 | 9.84E-01 | 2.79E-02 |
| 230.09583 | 146.44 | 16.23 | 21.24 | 17.60 | 20.94 | 5.06E-19 | 7.61E-14 | 7.22E-02 | 3.06E-13 | 1.18E-08 | 9.61E-01 | 3.60E-07 |
| 230.11608 | 29.35  | 17.20 | 17.64 | 16.69 | 17.43 | 2.84E-03 | 3.09E-01 | 1.74E-01 | 8.19E-01 | 1.70E-03 | 8.58E-01 | 2.95E-02 |
| 230.12133 | 46.54  | 17.16 | 15.29 | 16.10 | 15.74 | 3.94E-16 | 7.57E-14 | 2.53E-06 | 7.87E-10 | 8.97E-04 | 1.70E-01 | 3.39E-01 |
| 230.12153 | 172.51 | 17.93 | 14.68 | 14.30 | 15.33 | 1.14E-52 | 3.65E-14 | 3.65E-14 | 3.65E-14 | 2.11E-01 | 7.70E-03 | 3.28E-06 |
| 230.13288 | 61.51  | 14.73 | 14.75 | 13.60 | 14.11 | 3.34E-02 | 1.00E+00 | 5.14E-02 | 5.25E-01 | 5.73E-02 | 5.26E-01 | 6.89E-01 |
| 230.1386  | 169.15 | 18.83 | 16.73 | 17.12 | 17.32 | 4.29E-25 | 4.52E-14 | 7.23E-14 | 3.39E-13 | 1.61E-01 | 1.24E-02 | 7.06E-01 |
| 230.13862 | 31.79  | 19.32 | 19.46 | 19.12 | 19.04 | 2.81E-02 | 7.92E-01 | 4.85E-01 | 2.29E-01 | 1.06E-01 | 3.53E-02 | 9.55E-01 |
| 230.15795 | 50.59  | 19.63 | 19.11 | 19.31 | 19.20 | 3.18E-05 | 2.87E-05 | 2.02E-02 | 1.13E-03 | 2.99E-01 | 8.73E-01 | 7.80E-01 |
| 230.17503 | 176.32 | 17.15 | 14.11 | 14.11 | 14.87 | 1.37E-38 | 3.65E-14 | 3.65E-14 | 7.18E-14 | 1.00E+00 | 4.35E-03 | 3.93E-03 |
| 230.24771 | 22.8   | 19.39 | 18.91 | 18.92 | 19.67 | 9.07E-04 | 9.90E-02 | 1.11E-01 | 5.49E-01 | 1.00E+00 | 3.55E-03 | 4.08E-03 |
| 230.35587 | 253.24 | 18.79 | 17.17 | 18.44 | 17.96 | 5.78E-08 | 3.09E-08 | 5.40E-01 | 1.36E-02 | 3.45E-05 | 2.93E-02 | 3.16E-01 |
| 230.49527 | 135.77 | 15.15 | 17.59 | 18.13 | 16.92 | 6.77E-20 | 1.77E-13 | 7.36E-14 | 1.40E-07 | 2.93E-01 | 1.41E-01 | 7.64E-04 |
| 230.57511 | 83.38  | 18.66 | 22.25 | 22.52 | 22.04 | 9.86E-52 | 3.65E-14 | 3.65E-14 | 3.65E-14 | 6.12E-01 | 7.74E-01 | 1.38E-01 |
| 230.62862 | 35.07  | 15.26 | 17.12 | 17.00 | 16.53 | 8.92E-06 | 2.76E-05 | 8.70E-05 | 1.03E-02 | 9.91E-01 | 5.06E-01 | 6.83E-01 |
| 230.69037 | 264.51 | 17.03 | 15.30 | 16.21 | 16.12 | 1.23E-07 | 1.43E-08 | 1.76E-02 | 9.14E-03 | 8.20E-03 | 2.83E-02 | 9.90E-01 |
| 230.80993 | 49.21  | 17.78 | 18.13 | 18.23 | 17.96 | 2.93E-04 | 6.82E-03 | 2.60E-04 | 3.75E-01 | 8.37E-01 | 4.24E-01 | 8.92E-02 |
| 230.88596 | 42.97  | 16.19 | 18.03 | 18.11 | 17.70 | 1.85E-37 | 3.65E-14 | 3.65E-14 | 6.16E-14 | 9.34E-01 | 1.02E-01 | 2.17E-02 |
| 230.90472 | 41.59  | 14.43 | 16.35 | 16.01 | 15.87 | 6.82E-20 | 7.47E-14 | 1.70E-13 | 4.83E-11 | 3.34E-01 | 9.33E-02 | 8.93E-01 |
| 230.93756 | 20.4   | 16.47 | 15.43 | 15.70 | 15.28 | 1.27E-11 | 8.51E-09 | 2.49E-05 | 1.19E-10 | 3.77E-01 | 8.12E-01 | 6.89E-02 |
| 230.94315 | 115.05 | 13.06 | 17.27 | 14.77 | 17.15 | 8.29E-24 | 7.17E-14 | 1.70E-04 | 7.36E-14 | 4.63E-08 | 9.93E-01 | 4.09E-07 |
| 230.9506  | 41.59  | 18.04 | 18.97 | 18.83 | 19.63 | 1.55E-17 | 6.17E-08 | 4.90E-06 | 7.32E-14 | 8.03E-01 | 5.02E-04 | 1.03E-05 |
| 230.95864 | 44.84  | 18.95 | 12.78 | 11.96 | 15.89 | 4.88E-18 | 4.60E-13 | 7.33E-14 | 8.09E-04 | 7.24E-01 | 1.02E-03 | 1.30E-05 |
| 230.98713 | 158.84 | 14.25 | 17.77 | 17.12 | 15.79 | 2.28E-19 | 7.49E-14 | 3.39E-13 | 2.35E-04 | 2.92E-01 | 2.69E-06 | 2.93E-03 |
| 231.02692 | 280.91 | 14.27 | 18.94 | 19.16 | 17.43 | 8.97E-40 | 3.65E-14 | 3.65E-14 | 7.27E-14 | 9.14E-01 | 2.93E-05 | 4.92E-06 |
| 231.04324 | 216.92 | 14.78 | 19.38 | 20.21 | 18.69 | 9.58E-39 | 3.65E-14 | 3.65E-14 | 6.43E-14 | 1.01E-01 | 2.59E-01 | 3.41E-04 |
| 231.05459 | 55.29  | 22.14 | 20.81 | 21.02 | 19.92 | 7.59E-14 | 1.80E-06 | 6.57E-05 | 8.24E-14 | 8.49E-01 | 5.21E-03 | 2.54E-04 |
| 231.06467 | 65.35  | 16.81 | 15.44 | 16.67 | 15.91 | 2.57E-12 | 6.73E-11 | 8.92E-01 | 5.37E-05 | 8.98E-09 | 8.66E-02 | 1.20E-03 |
| 231.07646 | 83.13  | 16.92 | 19.68 | 20.02 | 19.64 | 4.76E-49 | 3.65E-14 | 3.65E-14 | 3.65E-14 | 2.35E-01 | 9.96E-01 | 1.68E-01 |
| 231.08766 | 203.88 | 16.53 | 13.78 | 13.97 | 14.52 | 2.21E-05 | 6.55E-05 | 1.95E-04 | 8.30E-03 | 9.91E-01 | 6.67E-01 | 8.25E-01 |
| 231.09267 | 59.02  | 16.50 | 16.16 | 16.91 | 16.47 | 3.91E-03 | 3.31E-01 | 1.40E-01 | 9.99E-01 | 1.37E-03 | 4.65E-01 | 1.35E-01 |
| 231.09865 | 161.81 | 16.96 | 16.81 | 16.12 | 17.16 | 3.62E-03 | 9.52E-01 | 1.70E-02 | 8.98E-01 | 8.79E-02 | 6.42E-01 | 3.26E-03 |
| 231.10542 | 291.01 | 18.63 | 18.66 | 18.46 | 18.62 | 9.50E-01 | 1.00E+00 | 9.65E-01 | 1.00E+00 | 9.48E-01 | 9.99E-01 | 9.77E-01 |
| 231.12268 | 224.1  | 15.37 | 12.57 | 13.18 | 12.33 | 7.58E-09 | 4.85E-07 | 9.94E-05 | 8.65E-08 | 6.49E-01 | 9.67E-01 | 3.78E-01 |
| 231.13375 | 280.84 | 17.84 | 15.62 | 15.02 | 16.15 | 7.94E-23 | 8.05E-14 | 5.41E-14 | 4.34E-09 | 9.60E-02 | 2.08E-01 | 1.92E-04 |
| 231.13388 | 167.62 | 18.49 | 15.04 | 15.03 | 16.26 | 2.14E-49 | 3.65E-14 | 3.65E-14 | 5.85E-14 | 1.00E+00 | 1.19E-07 | 8.23E-08 |
| 231.13791 | 297.14 | 17.11 | 15.58 | 15.77 | 15.75 | 6.16E-09 | 8.36E-08 | 2.20E-06 | 4.10E-06 | 9.03E-01 | 9.28E-01 | 1.00E+00 |
| 231.13794 | 172.66 | 17.51 | 15.21 | 15.52 | 15.80 | 8.21E-30 | 3.67E-14 | 5.70E-14 | 7.29E-14 | 3.25E-01 | 1.30E-02 | 4.81E-01 |
| 231.17019 | 30.75  | 19.35 | 20.16 | 20.09 | 19.74 | 1.14E-04 | 2.42E-04 | 8.85E-04 | 2.10E-01 | 9.84E-01 | 1.70E-01 | 3.13E-01 |
| 231.17406 | 22.26  | 16.56 | 13.26 | 14.17 | 14.71 | 1.53E-37 | 3.65E-14 | 4.34E-14 | 7.93E-14 | 1.93E-04 | 2.34E-09 | 6.67E-02 |
| 231.17435 | 169.51 | 17.07 | 14.88 | 14.93 | 15.34 | 5.16E-22 | 7.45E-14 | 7.41E-14 | 5.51E-12 | 9.96E-01 | 2.06E-01 | 2.94E-01 |
| 231.21073 | 171.63 | 17.12 | 14.28 | 14.12 | 15.13 | 4.93E-34 | 3.67E-14 | 3.65E-14 | 7.74E-14 | 8.95E-01 | 2.26E-03 | 1.42E-04 |
| 231.25099 | 22.89  | 16.62 | 14.71 | 15.02 | 16.45 | 7.92E-21 | 7.56E-14 | 3.13E-12 | 8.53E-01 | 4.60E-01 | 1.33E-12 | 3.94E-09 |
| 231.38238 | 249.9  | 15.85 | 15.73 | 17.11 | 15.97 | 2.31E-08 | 9.60E-01 | 8.53E-07 | 9.58E-01 | 1.84E-07 | 7.75E-01 | 3.56E-05 |
| 231.49855 | 87.34  | 15.28 | 16.78 | 17.20 | 16.70 | 4.10E-09 | 7.97E-06 | 5.24E-09 | 4.97E-05 | 5.35E-01 | 9.93E-01 | 3.88E-01 |
| 231.51976 | 102.77 | 14.21 | 14.25 | 15.00 | 14.93 | 1.78E-01 | 1.00E+00 | 2.99E-01 | 4.10E-01 | 3.73E-01 | 4.86E-01 | 9.99E-01 |
| 231.56807 | 141.34 | 10.52 | 13.63 | 12.02 | 11.96 | 9.22E-08 | 9.79E-09 | 1.26E-02 | 2.51E-02 | 9.27E-03 | 8.79E-03 | 9.99E-01 |
| 231.57379 | 84.47  | 16.48 | 19.02 | 19.36 | 18.99 | 5.74E-47 | 3.65E-14 | 3.65E-14 | 3.65E-14 | 2.14E-01 | 9.97E-01 | 1.54E-01 |
| 231.5954  | 24.36  | 13.72 | 14.68 | 11.66 | 16.44 | 2.16E-22 | 7.97E-02 | 2.69E-06 | 1.42E-09 | 1.97E-11 | 2.54E-04 | 4.79E-14 |
| 231.60074 | 103.93 | 16.85 | 19.09 | 19.41 | 18.44 | 3.07E-36 | 3.67E-14 | 3.65E-14 | 7.68E-14 | 2.72E-01 | 3.19E-03 | 1.76E-06 |

|           |        |       |       |       |       |          |          |          |          |          |          |          |
|-----------|--------|-------|-------|-------|-------|----------|----------|----------|----------|----------|----------|----------|
| 231.92724 | 34     | 14.86 | 15.65 | 15.36 | 16.02 | 8.72E-04 | 2.70E-02 | 2.88E-01 | 4.51E-04 | 7.31E-01 | 6.00E-01 | 1.11E-01 |
| 231.93802 | 71.29  | 16.05 | 15.50 | 14.51 | 15.54 | 4.64E-03 | 5.67E-01 | 1.84E-03 | 6.42E-01 | 1.09E-01 | 1.00E+00 | 1.02E-01 |
| 231.9681  | 264.74 | 17.27 | 17.01 | 17.40 | 17.44 | 1.29E-01 | 5.22E-01 | 8.94E-01 | 8.06E-01 | 1.84E-01 | 1.38E-01 | 9.97E-01 |
| 231.97779 | 26.45  | 14.60 | 12.33 | 13.62 | 13.92 | 9.47E-06 | 2.21E-06 | 1.06E-01 | 4.15E-01 | 2.04E-02 | 3.64E-03 | 9.18E-01 |
| 231.98383 | 44.73  | 20.10 | 20.34 | 20.14 | 19.83 | 1.66E-01 | 6.69E-01 | 9.98E-01 | 5.94E-01 | 7.78E-01 | 1.05E-01 | 5.14E-01 |
| 231.9916  | 41.25  | 19.69 | 10.47 | 12.79 | 15.91 | 2.05E-53 | 3.65E-14 | 3.65E-14 | 2.04E-13 | 6.12E-06 | 4.76E-14 | 1.63E-09 |
| 231.99729 | 124.23 | 14.76 | 13.98 | 13.15 | 13.69 | 1.77E-02 | 4.23E-01 | 8.90E-03 | 1.75E-01 | 3.86E-01 | 9.49E-01 | 7.45E-01 |
| 232.0378  | 96.75  | 16.19 | 18.28 | 18.10 | 17.56 | 4.37E-22 | 7.26E-14 | 7.65E-14 | 2.08E-09 | 8.32E-01 | 5.25E-03 | 5.51E-02 |
| 232.07631 | 83.85  | 17.88 | 21.02 | 20.72 | 20.35 | 2.86E-40 | 3.65E-14 | 3.65E-14 | 4.19E-14 | 4.76E-01 | 1.28E-02 | 3.30E-01 |
| 232.08219 | 294.13 | 16.89 | 16.58 | 15.50 | 15.58 | 1.63E-13 | 3.89E-01 | 9.01E-11 | 3.61E-09 | 1.39E-06 | 1.89E-05 | 9.80E-01 |
| 232.09101 | 269.25 | 19.03 | 16.53 | 16.27 | 16.88 | 2.97E-29 | 5.76E-14 | 3.72E-14 | 7.43E-14 | 6.63E-01 | 4.76E-01 | 5.27E-02 |
| 232.10151 | 72.57  | 14.97 | 14.24 | 14.26 | 14.47 | 1.38E-01 | 1.71E-01 | 1.78E-01 | 5.13E-01 | 1.00E+00 | 9.31E-01 | 9.40E-01 |
| 232.10781 | 208.64 | 15.74 | 8.94  | 8.74  | 10.49 | 3.76E-39 | 3.65E-14 | 3.65E-14 | 6.47E-14 | 9.77E-01 | 1.34E-02 | 3.37E-03 |
| 232.11779 | 281.6  | 18.99 | 16.95 | 16.75 | 17.00 | 7.68E-18 | 8.20E-13 | 7.74E-14 | 8.54E-12 | 8.58E-01 | 9.98E-01 | 7.72E-01 |
| 232.12789 | 210.15 | 15.84 | 9.49  | 9.27  | 11.34 | 6.30E-33 | 3.67E-14 | 3.65E-14 | 7.82E-14 | 9.72E-01 | 3.53E-03 | 6.81E-04 |
| 232.13913 | 53.56  | 16.49 | 18.42 | 17.47 | 18.76 | 4.63E-12 | 1.00E-08 | 7.70E-03 | 4.99E-11 | 1.51E-02 | 7.16E-01 | 4.83E-04 |
| 232.15413 | 34.52  | 24.78 | 24.66 | 25.12 | 24.67 | 2.88E-02 | 8.98E-01 | 1.67E-01 | 9.21E-01 | 3.93E-02 | 1.00E+00 | 5.22E-02 |
| 232.17079 | 152.22 | 16.55 | 13.72 | 13.18 | 13.65 | 1.98E-15 | 3.21E-10 | 1.45E-13 | 3.54E-10 | 5.80E-01 | 9.99E-01 | 6.98E-01 |
| 232.17239 | 24.04  | 15.46 | 14.22 | 15.85 | 14.76 | 4.89E-03 | 4.39E-02 | 8.40E-01 | 4.66E-01 | 4.75E-03 | 7.02E-01 | 1.25E-01 |
| 232.4974  | 87.98  | 15.09 | 14.46 | 15.02 | 14.95 | 1.42E-01 | 1.33E-01 | 9.95E-01 | 9.68E-01 | 2.32E-01 | 3.76E-01 | 9.96E-01 |
| 232.57756 | 85.01  | 16.12 | 17.99 | 17.51 | 17.59 | 5.39E-22 | 6.67E-14 | 5.08E-13 | 2.07E-13 | 3.70E-02 | 1.38E-01 | 9.68E-01 |
| 232.8074  | 47.43  | 16.23 | 16.04 | 15.95 | 16.15 | 1.91E-01 | 4.99E-01 | 1.60E-01 | 9.33E-01 | 9.16E-01 | 8.79E-01 | 5.10E-01 |
| 232.89635 | 47.61  | 20.94 | 22.78 | 22.82 | 22.72 | 1.27E-36 | 3.65E-14 | 3.65E-14 | 3.74E-14 | 9.90E-01 | 9.76E-01 | 8.89E-01 |
| 232.92259 | 37.84  | 17.85 | 19.50 | 19.78 | 19.61 | 1.43E-29 | 7.11E-14 | 3.74E-14 | 6.43E-14 | 3.08E-01 | 9.23E-01 | 7.15E-01 |
| 232.92807 | 273.2  | 20.63 | 14.89 | 15.75 | 15.99 | 2.74E-30 | 3.67E-14 | 6.16E-14 | 7.52E-14 | 2.51E-01 | 1.00E-01 | 9.56E-01 |
| 232.95223 | 253.11 | 15.49 | 16.92 | 17.04 | 15.74 | 2.73E-04 | 5.09E-03 | 1.79E-03 | 9.38E-01 | 9.94E-01 | 4.74E-02 | 2.21E-02 |
| 232.95867 | 122.19 | 13.07 | 13.88 | 10.44 | 13.37 | 2.84E-10 | 3.71E-01 | 1.57E-06 | 9.37E-01 | 9.32E-10 | 7.71E-01 | 4.15E-07 |
| 232.98989 | 116.82 | 16.85 | 14.00 | 14.70 | 15.08 | 3.34E-17 | 7.49E-14 | 5.92E-11 | 2.02E-07 | 1.18E-01 | 5.43E-03 | 6.35E-01 |
| 232.99877 | 68.64  | 14.79 | 16.64 | 16.62 | 15.49 | 2.48E-05 | 1.85E-04 | 1.93E-04 | 3.98E-01 | 1.00E+00 | 6.41E-02 | 6.86E-02 |
| 233.00813 | 35.29  | 15.66 | 17.96 | 19.70 | 17.99 | 2.56E-58 | 3.65E-14 | 3.65E-14 | 3.65E-14 | 7.47E-14 | 9.98E-01 | 7.27E-14 |
| 233.02466 | 254.03 | 17.37 | 16.43 | 18.02 | 16.66 | 2.38E-04 | 6.53E-02 | 3.05E-01 | 2.59E-01 | 3.26E-04 | 9.42E-01 | 3.89E-03 |
| 233.03752 | 99.77  | 16.22 | 14.61 | 14.91 | 14.26 | 1.98E-04 | 2.82E-03 | 2.10E-02 | 2.39E-04 | 9.20E-01 | 8.88E-01 | 5.31E-01 |
| 233.0422  | 237.67 | 12.37 | 14.22 | 15.12 | 14.60 | 3.59E-28 | 1.05E-13 | 3.67E-14 | 7.34E-14 | 4.35E-04 | 3.42E-01 | 1.13E-01 |
| 233.05906 | 195.9  | 18.65 | 19.94 | 20.69 | 20.32 | 1.04E-17 | 6.37E-08 | 7.39E-14 | 1.15E-11 | 5.29E-03 | 3.70E-01 | 3.63E-01 |
| 233.06305 | 52.08  | 16.29 | 15.43 | 15.34 | 15.96 | 1.62E-03 | 9.98E-03 | 3.29E-03 | 6.53E-01 | 9.91E-01 | 2.52E-01 | 1.39E-01 |
| 233.06674 | 277.8  | 14.93 | 19.29 | 19.71 | 18.25 | 2.81E-24 | 7.25E-14 | 5.78E-14 | 1.91E-11 | 7.83E-01 | 1.17E-01 | 9.29E-03 |
| 233.0761  | 84.09  | 16.00 | 17.63 | 17.19 | 17.31 | 4.37E-12 | 1.26E-11 | 5.74E-07 | 1.09E-07 | 2.16E-01 | 5.19E-01 | 9.57E-01 |
| 233.08407 | 68.1   | 14.72 | 17.96 | 17.29 | 18.35 | 2.34E-18 | 1.23E-13 | 1.18E-09 | 7.45E-14 | 3.30E-01 | 7.87E-01 | 4.94E-02 |
| 233.09492 | 58.94  | 15.84 | 14.70 | 15.63 | 15.30 | 8.20E-05 | 5.10E-05 | 8.39E-01 | 1.57E-01 | 1.90E-03 | 1.09E-01 | 5.86E-01 |
| 233.10301 | 22.74  | 16.23 | 13.60 | 13.97 | 13.05 | 1.92E-11 | 4.89E-08 | 2.65E-06 | 1.15E-10 | 8.44E-01 | 6.29E-01 | 1.88E-01 |
| 233.10336 | 271.76 | 17.38 | 15.01 | 14.63 | 15.55 | 1.19E-23 | 7.43E-14 | 5.74E-14 | 9.50E-11 | 4.53E-01 | 1.79E-01 | 3.23E-03 |
| 233.11249 | 184.1  | 16.66 | 13.68 | 14.12 | 14.55 | 1.64E-31 | 3.65E-14 | 4.79E-14 | 7.41E-14 | 2.17E-01 | 1.61E-03 | 2.61E-01 |
| 233.11817 | 286.2  | 17.29 | 14.73 | 14.76 | 14.36 | 2.80E-15 | 9.92E-11 | 1.06E-10 | 7.40E-13 | 1.00E+00 | 7.64E-01 | 7.16E-01 |
| 233.13976 | 27.98  | 17.78 | 17.49 | 16.51 | 17.31 | 3.40E-08 | 4.96E-01 | 1.26E-08 | 1.24E-01 | 3.10E-05 | 8.49E-01 | 1.35E-03 |
| 233.15346 | 283.87 | 18.09 | 16.71 | 16.74 | 16.70 | 2.51E-13 | 2.83E-10 | 5.39E-10 | 5.88E-10 | 9.98E-01 | 1.00E+00 | 9.96E-01 |
| 233.18982 | 288.66 | 17.36 | 16.07 | 16.26 | 16.28 | 1.31E-10 | 1.38E-09 | 1.98E-07 | 9.93E-07 | 7.77E-01 | 7.27E-01 | 9.99E-01 |
| 233.22613 | 23.73  | 16.91 | 12.43 | 13.39 | 14.33 | 8.13E-36 | 3.65E-14 | 3.94E-14 | 1.03E-13 | 1.03E-02 | 4.30E-08 | 1.54E-02 |
| 233.22622 | 290.64 | 17.42 | 14.87 | 14.99 | 15.33 | 1.75E-12 | 1.24E-10 | 6.23E-10 | 3.10E-07 | 9.87E-01 | 6.24E-01 | 8.10E-01 |
| 233.22633 | 164.95 | 17.58 | 14.83 | 14.71 | 15.70 | 9.76E-29 | 4.65E-14 | 3.87E-14 | 4.38E-12 | 9.65E-01 | 3.81E-03 | 6.47E-04 |
| 233.52633 | 251.55 | 18.05 | 17.34 | 18.23 | 17.45 | 3.72E-02 | 1.84E-01 | 9.57E-01 | 3.41E-01 | 6.87E-02 | 9.92E-01 | 1.52E-01 |
| 233.5312  | 122.55 | 17.37 | 12.61 | 15.26 | 13.99 | 1.46E-16 | 7.56E-14 | 2.55E-04 | 4.22E-09 | 4.78E-06 | 5.32E-02 | 8.61E-02 |
| 233.58522 | 81.07  | 18.62 | 22.20 | 21.80 | 21.50 | 7.13E-18 | 7.43E-14 | 3.95E-13 | 1.53E-10 | 7.64E-01 | 3.51E-01 | 8.91E-01 |
| 233.89987 | 48.36  | 15.26 | 16.34 | 16.40 | 16.54 | 1.37E-13 | 6.23E-09 | 4.99E-10 | 1.53E-11 | 9.82E-01 | 6.49E-01 | 8.50E-01 |
| 233.91515 | 265.61 | 17.73 | 10.49 | 9.72  | 12.09 | 2.42E-30 | 4.72E-14 | 3.67E-14 | 8.00E-14 | 6.28E-01 | 8.38E-02 | 2.45E-03 |
| 233.96644 | 298.37 | 17.65 | 14.20 | 13.28 | 15.30 | 7.13E-35 | 4.43E-14 | 3.65E-14 | 3.30E-12 | 1.54E-02 | 3.18E-03 | 3.93E-09 |
| 233.98247 | 59.75  | 18.22 | 16.83 | 16.62 | 16.56 | 7.43E-15 | 2.71E-09 | 5.63E-12 | 5.71E-12 | 7.72E-01 | 6.38E-01 | 9.94E-01 |
| 234.00066 | 101.71 | 16.04 | 15.22 | 15.42 | 15.70 | 1.61E-01 | 1.37E-01 | 3.48E-01 | 8.26E-01 | 9.58E-01 | 6.21E-01 | 8.86E-01 |
| 234.01115 | 24.11  | 11.27 | 11.62 | 15.27 | 12.01 | 4.56E-16 | 8.85E-01 | 8.22E-14 | 4.24E-01 | 4.65E-12 | 8.60E-01 | 1.50E-09 |
| 234.02358 | 68.93  | 15.99 | 12.03 | 12.64 | 12.56 | 1.47E-12 | 3.55E-11 | 1.51E-08 | 2.26E-08 | 6.94E-01 | 7.94E-01 | 9.99E-01 |
| 234.02837 | 262.15 | 17.12 | 13.39 | 13.87 | 15.03 | 4.61E-14 | 5.10E-13 | 1.40E-10 | 1.07E-04 | 7.54E-01 | 6.08E-03 | 8.71E-02 |
| 234.04304 | 63.16  | 14.90 | 15.08 | 15.34 | 15.00 | 6.92E-01 | 9.62E-01 | 6.38E-01 | 9.93E-01 | 9.08E-01 | 9.97E-01 | 8.32E-01 |
| 234.0487  | 126    | 12.65 | 14.00 | 13.83 | 14.47 | 7.96E-04 | 1.48E-02 | 3.99E-02 | 5.78E-04 | 9.83E-01 | 7.58E-01 | 5.33E-01 |
| 234.0522  | 78.71  | 15.74 | 15.41 | 15.67 | 15.62 | 8.10E-01 | 7.75E-01 | 9.96E-01 | 9.86E-01 | 8.88E-01 | 9.41E-01 | 9.99E-01 |
| 234.06212 | 60.57  | 17.51 | 18.42 | 17.33 | 16.90 | 2.00E-04 | 2.99E-02 | 9.38E-01 | 2.55E-01 | 6.70E-03 | 9.30E-05 | 5.91E-01 |
| 234.06225 | 193.33 | 13.85 | 15.15 | 15.15 | 15.37 | 1.88E-03 | 1.49E-02 | 1.39E-02 | 3.94E-03 | 1.00E+00 | 9.64E-01 | 9.62E-01 |
| 234.06993 | 194.11 | 14.53 | 16.06 | 16.35 | 15.60 | 3.27E-13 | 2.22E-09 | 1.04E-12 | 8.18E-05 | 6.27E-01 | 2.35E-01 | 1.25E-02 |
| 234.08086 | 36.74  | 13.98 | 17.30 | 14.30 | 16.84 | 4.89E-17 | 5.55E-13 | 8.67E-01 | 9.63E-10 | 1.42E-10 | 7.32E-01 | 1.16E-07 |
| 234.08585 | 80.64  | 17.62 | 19.08 | 18.59 | 18.91 | 1.72E-07 | 3.74E-07 | 1.21E-03 | 1.66E-05 | 2.63E-01 | 9.23E-01 | 6.60E-01 |

|           |        |       |       |       |       |          |          |          |          |          |          |          |
|-----------|--------|-------|-------|-------|-------|----------|----------|----------|----------|----------|----------|----------|
| 234.09712 | 274.65 | 18.31 | 16.11 | 15.98 | 16.35 | 1.53E-26 | 6.83E-14 | 5.12E-14 | 7.43E-14 | 9.32E-01 | 6.98E-01 | 3.36E-01 |
| 234.10659 | 278.37 | 20.77 | 19.56 | 19.08 | 19.27 | 3.11E-06 | 2.40E-03 | 5.77E-06 | 1.34E-04 | 5.12E-01 | 8.47E-01 | 9.53E-01 |
| 234.11571 | 206.26 | 16.53 | 13.08 | 13.44 | 13.51 | 1.15E-22 | 7.27E-14 | 7.45E-14 | 8.05E-14 | 7.29E-01 | 6.28E-01 | 9.97E-01 |
| 234.14324 | 194.96 | 16.96 | 14.06 | 14.97 | 13.88 | 2.09E-15 | 1.61E-12 | 1.04E-06 | 3.58E-13 | 8.23E-02 | 9.68E-01 | 2.91E-02 |
| 234.14875 | 191.87 | 16.77 | 13.57 | 14.04 | 14.42 | 1.60E-37 | 3.65E-14 | 3.65E-14 | 6.63E-14 | 1.40E-01 | 1.23E-03 | 3.30E-01 |
| 234.15828 | 26.69  | 17.14 | 15.22 | 16.21 | 16.09 | 6.68E-08 | 7.90E-09 | 1.10E-02 | 4.71E-03 | 9.41E-03 | 3.67E-02 | 9.84E-01 |
| 234.18125 | 75.85  | 13.52 | 14.72 | 13.12 | 14.63 | 1.46E-04 | 1.84E-02 | 7.56E-01 | 4.26E-02 | 9.34E-01 | 9.96E-01 | 2.89E-03 |
| 234.50864 | 85.12  | 14.67 | 14.95 | 14.84 | 14.46 | 3.29E-01 | 7.18E-01 | 9.22E-01 | 8.58E-01 | 9.75E-01 | 2.94E-01 | 5.19E-01 |
| 234.51209 | 139.19 | 15.75 | 17.65 | 16.66 | 15.95 | 2.42E-12 | 7.16E-12 | 1.85E-03 | 8.66E-01 | 9.37E-04 | 6.40E-09 | 3.87E-02 |
| 234.52419 | 197.18 | 14.36 | 14.63 | 14.53 | 15.16 | 2.34E-01 | 8.95E-01 | 9.69E-01 | 1.80E-01 | 9.95E-01 | 5.62E-01 | 4.06E-01 |
| 234.53903 | 122.43 | 18.27 | 17.35 | 16.53 | 16.42 | 7.65E-16 | 2.63E-04 | 6.99E-13 | 2.80E-13 | 2.12E-03 | 6.41E-04 | 9.70E-01 |
| 234.56456 | 134.48 | 17.13 | 18.69 | 19.08 | 19.24 | 3.43E-15 | 3.75E-08 | 4.25E-12 | 5.90E-13 | 4.54E-01 | 1.87E-01 | 9.35E-01 |
| 234.56846 | 132.58 | 14.32 | 17.09 | 17.42 | 14.39 | 8.06E-23 | 2.75E-13 | 7.38E-14 | 9.97E-01 | 7.87E-01 | 1.04E-11 | 9.91E-14 |
| 234.58397 | 80.68  | 17.41 | 18.87 | 18.49 | 18.71 | 2.02E-08 | 8.48E-08 | 9.48E-05 | 3.71E-06 | 4.47E-01 | 9.36E-01 | 8.27E-01 |
| 234.58986 | 24.16  | 14.19 | 15.96 | 12.58 | 17.77 | 1.97E-29 | 2.64E-05 | 1.32E-04 | 7.52E-14 | 7.83E-14 | 5.39E-05 | 3.65E-14 |
| 234.71114 | 210.37 | 10.75 | 15.77 | 14.66 | 14.51 | 7.93E-25 | 4.56E-14 | 7.38E-14 | 1.05E-13 | 6.40E-02 | 3.36E-02 | 9.87E-01 |
| 234.89367 | 48.47  | 19.49 | 21.25 | 21.32 | 21.17 | 3.77E-36 | 3.65E-14 | 3.65E-14 | 3.87E-14 | 9.45E-01 | 9.52E-01 | 7.04E-01 |
| 234.90792 | 253.09 | 19.78 | 19.94 | 19.58 | 19.79 | 8.05E-01 | 9.70E-01 | 9.39E-01 | 1.00E+00 | 7.52E-01 | 9.80E-01 | 9.38E-01 |
| 234.94021 | 39.65  | 16.73 | 16.44 | 16.60 | 17.26 | 1.23E-02 | 6.28E-01 | 9.50E-01 | 1.42E-01 | 9.15E-01 | 8.21E-03 | 4.83E-02 |
| 234.9564  | 274.36 | 18.78 | 16.21 | 15.66 | 17.92 | 2.79E-27 | 7.36E-14 | 4.19E-14 | 1.15E-02 | 1.89E-01 | 3.95E-08 | 3.95E-13 |
| 234.9624  | 31.31  | 19.20 | 21.41 | 20.80 | 20.89 | 5.55E-43 | 3.65E-14 | 3.70E-14 | 3.67E-14 | 4.37E-05 | 1.17E-03 | 9.08E-01 |
| 234.98134 | 50.01  | 19.06 | 19.50 | 20.19 | 20.01 | 3.14E-10 | 5.61E-02 | 1.16E-09 | 9.52E-07 | 5.49E-04 | 2.48E-02 | 7.45E-01 |
| 235.00387 | 174.74 | 12.68 | 16.44 | 15.89 | 14.35 | 1.43E-13 | 1.49E-12 | 8.73E-10 | 4.93E-03 | 6.82E-01 | 3.28E-04 | 1.34E-02 |
| 235.01335 | 41.21  | 12.69 | 11.15 | 15.31 | 12.65 | 1.08E-08 | 6.49E-02 | 1.58E-04 | 1.00E+00 | 2.09E-09 | 1.02E-01 | 3.42E-04 |
| 235.02078 | 243.64 | 16.93 | 18.32 | 20.21 | 18.46 | 1.62E-26 | 8.33E-07 | 3.65E-14 | 1.08E-07 | 3.79E-11 | 9.53E-01 | 2.29E-09 |
| 235.02657 | 49.71  | 15.36 | 15.71 | 15.72 | 15.34 | 6.67E-01 | 8.15E-01 | 7.90E-01 | 1.00E+00 | 1.00E+00 | 8.25E-01 | 8.02E-01 |
| 235.03075 | 188.89 | 14.31 | 15.45 | 15.76 | 15.20 | 1.47E-06 | 2.20E-04 | 9.77E-07 | 9.00E-03 | 6.75E-01 | 8.11E-01 | 1.94E-01 |
| 235.04061 | 67.47  | 17.94 | 17.26 | 17.66 | 17.74 | 2.19E-02 | 1.09E-02 | 5.67E-01 | 8.14E-01 | 2.79E-01 | 1.58E-01 | 9.84E-01 |
| 235.04766 | 75.26  | 15.09 | 16.59 | 16.31 | 15.75 | 2.81E-07 | 4.00E-07 | 4.58E-05 | 7.99E-02 | 7.34E-01 | 1.83E-02 | 2.01E-01 |
| 235.05505 | 193.04 | 10.62 | 13.34 | 12.99 | 14.05 | 2.01E-10 | 5.06E-07 | 1.30E-05 | 5.38E-10 | 8.94E-01 | 5.20E-01 | 1.66E-01 |
| 235.05546 | 69.45  | 16.69 | 16.27 | 16.35 | 16.46 | 2.75E-01 | 2.52E-01 | 4.15E-01 | 7.55E-01 | 9.89E-01 | 8.60E-01 | 9.62E-01 |
| 235.06624 | 137.68 | 17.18 | 19.92 | 19.66 | 19.38 | 6.32E-15 | 4.45E-13 | 3.08E-11 | 1.18E-08 | 8.68E-01 | 4.36E-01 | 8.69E-01 |
| 235.0924  | 169.92 | 14.18 | 14.61 | 12.48 | 15.38 | 9.43E-07 | 8.23E-01 | 3.71E-03 | 8.87E-02 | 2.43E-04 | 4.59E-01 | 4.63E-07 |
| 235.09247 | 82.04  | 19.28 | 19.87 | 20.29 | 20.02 | 1.19E-04 | 4.37E-02 | 5.45E-05 | 7.36E-03 | 2.70E-01 | 9.15E-01 | 6.83E-01 |
| 235.11179 | 69.39  | 14.46 | 14.69 | 14.73 | 14.60 | 9.43E-01 | 9.65E-01 | 9.37E-01 | 9.92E-01 | 1.00E+00 | 9.98E-01 | 9.93E-01 |
| 235.11886 | 293.26 | 18.63 | 17.80 | 17.96 | 17.87 | 1.41E-02 | 1.98E-02 | 8.41E-02 | 4.76E-02 | 9.46E-01 | 9.95E-01 | 9.90E-01 |
| 235.13119 | 164.13 | 15.89 | 14.60 | 14.20 | 14.90 | 2.23E-07 | 9.89E-05 | 1.20E-07 | 6.23E-03 | 5.40E-01 | 7.72E-01 | 1.08E-01 |
| 235.1384  | 175.72 | 17.64 | 14.42 | 14.24 | 15.14 | 3.79E-46 | 3.65E-14 | 3.65E-14 | 3.87E-14 | 8.29E-01 | 4.59E-03 | 1.85E-04 |
| 235.16818 | 103.84 | 19.82 | 17.53 | 18.28 | 17.93 | 8.86E-21 | 7.07E-14 | 1.78E-10 | 1.44E-13 | 6.06E-03 | 3.19E-01 | 4.42E-01 |
| 235.20539 | 23.83  | 18.08 | 17.09 | 17.12 | 17.34 | 2.53E-12 | 1.26E-10 | 4.22E-10 | 3.70E-06 | 9.93E-01 | 3.30E-01 | 4.71E-01 |
| 235.20545 | 287.82 | 19.92 | 19.25 | 19.18 | 19.31 | 8.69E-02 | 1.68E-01 | 1.01E-01 | 2.65E-01 | 9.97E-01 | 9.98E-01 | 9.80E-01 |
| 235.24205 | 174.72 | 17.81 | 15.03 | 15.00 | 15.76 | 8.01E-45 | 3.65E-14 | 3.65E-14 | 4.65E-14 | 9.97E-01 | 5.76E-04 | 2.22E-04 |
| 235.50611 | 306.13 | 13.95 | 19.68 | 18.26 | 16.99 | 2.15E-76 | 3.65E-14 | 3.65E-14 | 3.65E-14 | 2.34E-10 | 3.67E-14 | 2.67E-08 |
| 235.51639 | 92.8   | 15.06 | 15.52 | 15.90 | 14.60 | 1.52E-04 | 3.88E-01 | 1.68E-02 | 3.75E-01 | 5.43E-01 | 1.32E-02 | 1.05E-04 |
| 235.56239 | 129.7  | 13.59 | 13.12 | 13.82 | 14.29 | 1.34E-02 | 5.13E-01 | 8.94E-01 | 1.77E-01 | 1.79E-01 | 6.57E-03 | 5.49E-01 |
| 235.56781 | 128.96 | 14.54 | 16.32 | 16.56 | 16.22 | 5.37E-11 | 7.23E-08 | 6.70E-10 | 8.02E-07 | 8.68E-01 | 9.90E-01 | 7.12E-01 |
| 235.63304 | 37.74  | 13.10 | 15.33 | 15.13 | 15.64 | 1.13E-08 | 2.16E-06 | 1.58E-05 | 1.15E-07 | 9.68E-01 | 8.98E-01 | 6.57E-01 |
| 235.92099 | 19.54  | 14.51 | 13.20 | 13.97 | 13.36 | 7.50E-13 | 9.39E-12 | 1.14E-02 | 5.38E-09 | 1.41E-04 | 8.18E-01 | 5.61E-03 |
| 235.94039 | 281.17 | 16.72 | 13.00 | 13.12 | 15.74 | 2.53E-13 | 2.21E-10 | 5.49E-10 | 2.78E-01 | 9.96E-01 | 1.46E-05 | 3.11E-05 |
| 235.96216 | 300.47 | 18.39 | 14.63 | 13.84 | 16.16 | 1.93E-34 | 4.16E-14 | 3.65E-14 | 5.56E-10 | 7.60E-02 | 5.48E-05 | 2.59E-10 |
| 235.9655  | 53.78  | 16.10 | 15.62 | 14.24 | 15.56 | 6.09E-09 | 3.51E-01 | 2.24E-09 | 2.59E-01 | 2.35E-05 | 9.96E-01 | 1.01E-04 |
| 235.98335 | 48.69  | 15.83 | 14.58 | 14.85 | 15.11 | 1.06E-07 | 8.55E-08 | 3.14E-05 | 5.59E-03 | 6.04E-01 | 9.33E-02 | 6.60E-01 |
| 236.00763 | 304.15 | 10.68 | 14.63 | 12.16 | 10.63 | 3.95E-17 | 7.61E-14 | 5.89E-03 | 1.00E+00 | 1.25E-06 | 1.11E-13 | 7.71E-03 |
| 236.01696 | 86.34  | 19.07 | 21.33 | 21.42 | 21.04 | 1.23E-23 | 7.38E-14 | 7.14E-14 | 1.13E-13 | 9.82E-01 | 6.07E-01 | 3.76E-01 |
| 236.02368 | 209.8  | 11.38 | 15.39 | 14.64 | 14.38 | 2.72E-22 | 6.72E-14 | 7.69E-14 | 1.85E-12 | 2.14E-01 | 5.72E-02 | 9.10E-01 |
| 236.02999 | 74.26  | 17.49 | 17.73 | 18.70 | 17.33 | 5.08E-06 | 8.24E-01 | 5.77E-05 | 9.31E-01 | 2.77E-03 | 5.01E-01 | 1.32E-05 |
| 236.04764 | 118.11 | 16.19 | 15.62 | 12.98 | 13.80 | 2.59E-26 | 1.90E-01 | 4.72E-14 | 1.76E-13 | 7.57E-14 | 3.14E-08 | 3.20E-02 |
| 236.05558 | 259.66 | 15.19 | 14.94 | 15.42 | 14.26 | 3.23E-02 | 9.15E-01 | 9.30E-01 | 8.81E-02 | 6.14E-01 | 3.41E-01 | 2.27E-02 |
| 236.06413 | 129.91 | 14.91 | 15.18 | 15.25 | 15.53 | 6.27E-02 | 6.25E-01 | 4.14E-01 | 3.37E-02 | 9.89E-01 | 4.30E-01 | 6.15E-01 |
| 236.07904 | 72.34  | 17.57 | 15.25 | 16.29 | 15.62 | 1.28E-25 | 4.16E-14 | 2.37E-09 | 7.43E-14 | 3.33E-06 | 3.04E-01 | 6.73E-03 |
| 236.09573 | 93.23  | 16.50 | 14.04 | 15.98 | 15.99 | 1.23E-10 | 1.12E-10 | 4.29E-01 | 4.84E-01 | 8.09E-07 | 1.62E-06 | 1.00E+00 |
| 236.11289 | 281.53 | 18.40 | 16.12 | 16.10 | 16.21 | 2.19E-27 | 6.43E-14 | 5.81E-14 | 7.42E-14 | 9.99E-01 | 9.84E-01 | 9.61E-01 |
| 236.12234 | 139.8  | 20.97 | 22.70 | 22.18 | 22.65 | 1.15E-03 | 2.17E-03 | 5.68E-02 | 4.48E-03 | 7.12E-01 | 9.99E-01 | 7.92E-01 |
| 236.14939 | 169.72 | 15.81 | 15.32 | 14.90 | 15.37 | 3.20E-04 | 8.52E-02 | 7.59E-05 | 1.53E-01 | 1.92E-01 | 9.97E-01 | 1.42E-01 |
| 236.1644  | 19.5   | 16.62 | 12.35 | 12.65 | 13.68 | 7.55E-53 | 3.65E-14 | 3.65E-14 | 3.67E-14 | 5.69E-01 | 3.58E-07 | 9.99E-05 |
| 236.16449 | 162.13 | 16.82 | 14.22 | 14.34 | 15.00 | 9.98E-39 | 3.65E-14 | 3.65E-14 | 7.34E-14 | 9.06E-01 | 2.47E-04 | 2.59E-03 |
| 236.17254 | 19.5   | 16.64 | 13.05 | 13.81 | 14.24 | 4.68E-68 | 4.02E-11 | 7.12E-09 | 7.62E-08 | 7.83E-01 | 6.76E-01 | 9.96E-01 |
| 236.17254 | 279.43 | 17.56 | 16.22 | 16.40 | 16.44 | 1.80E-12 | 3.65E-14 | 3.65E-14 | 3.65E-14 | 2.13E-06 | 6.98E-13 | 2.23E-02 |

|           |        |       |       |       |       |          |          |          |          |          |          |          |
|-----------|--------|-------|-------|-------|-------|----------|----------|----------|----------|----------|----------|----------|
| 236.20882 | 295.3  | 16.59 | 15.41 | 15.43 | 15.52 | 2.03E-05 | 1.67E-04 | 1.83E-04 | 1.10E-03 | 1.00E+00 | 9.84E-01 | 9.90E-01 |
| 236.20892 | 177.49 | 17.34 | 15.00 | 15.02 | 15.71 | 3.45E-33 | 3.65E-14 | 3.65E-14 | 7.74E-14 | 9.99E-01 | 1.29E-03 | 1.98E-03 |
| 236.45724 | 156.29 | 11.13 | 14.80 | 15.19 | 13.64 | 4.98E-27 | 6.78E-14 | 4.01E-14 | 1.12E-10 | 6.93E-01 | 8.72E-03 | 1.57E-04 |
| 236.5318  | 65.91  | 15.37 | 12.98 | 15.72 | 14.05 | 3.09E-11 | 2.33E-08 | 8.06E-01 | 6.00E-03 | 4.14E-10 | 5.02E-02 | 3.64E-04 |
| 236.53572 | 125.49 | 15.39 | 12.21 | 14.56 | 13.08 | 3.28E-25 | 4.54E-14 | 1.31E-02 | 2.17E-13 | 1.42E-13 | 1.75E-02 | 4.35E-06 |
| 236.5481  | 78.3   | 16.40 | 15.97 | 15.56 | 16.13 | 1.93E-02 | 3.73E-01 | 9.39E-03 | 7.51E-01 | 4.45E-01 | 9.45E-01 | 1.85E-01 |
| 236.55714 | 82.58  | 13.60 | 15.64 | 16.34 | 16.76 | 5.32E-21 | 1.36E-09 | 7.36E-14 | 7.45E-14 | 1.17E-01 | 3.73E-03 | 5.66E-01 |
| 236.64166 | 55.34  | 15.87 | 15.31 | 15.25 | 15.79 | 3.00E-03 | 3.10E-02 | 1.16E-02 | 9.83E-01 | 9.91E-01 | 1.12E-01 | 5.32E-02 |
| 236.64756 | 58.52  | 15.65 | 15.74 | 15.84 | 15.20 | 2.47E-01 | 9.91E-01 | 9.31E-01 | 5.04E-01 | 9.91E-01 | 3.66E-01 | 2.17E-01 |
| 236.8916  | 49.7   | 15.76 | 16.58 | 16.73 | 16.82 | 2.65E-13 | 1.24E-07 | 1.97E-10 | 2.17E-11 | 7.04E-01 | 3.59E-01 | 9.31E-01 |
| 236.90713 | 21.91  | 15.80 | 9.73  | 11.02 | 11.56 | 3.78E-52 | 3.65E-14 | 3.65E-14 | 3.65E-14 | 3.19E-04 | 3.04E-07 | 3.38E-01 |
| 236.91217 | 112    | 12.72 | 12.22 | 13.74 | 13.63 | 5.73E-03 | 7.20E-01 | 1.38E-01 | 2.54E-01 | 1.11E-02 | 2.96E-02 | 9.96E-01 |
| 236.93002 | 301.73 | 16.67 | 16.42 | 15.98 | 15.33 | 1.49E-08 | 6.22E-01 | 5.68E-03 | 1.08E-08 | 1.78E-01 | 9.04E-06 | 1.59E-02 |
| 236.94079 | 87.84  | 17.25 | 22.15 | 22.54 | 21.19 | 1.97E-33 | 3.72E-14 | 3.65E-14 | 7.33E-14 | 7.83E-01 | 1.03E-01 | 7.76E-03 |
| 236.95681 | 239.62 | 19.54 | 16.95 | 15.74 | 18.69 | 3.69E-40 | 6.56E-14 | 3.65E-14 | 3.58E-03 | 9.20E-06 | 4.50E-10 | 4.21E-14 |
| 236.96113 | 42.46  | 15.85 | 18.20 | 17.40 | 17.71 | 1.53E-24 | 4.45E-14 | 2.05E-12 | 7.38E-14 | 9.99E-04 | 1.14E-01 | 4.66E-01 |
| 236.97505 | 53.65  | 20.53 | 21.08 | 21.52 | 20.93 | 6.93E-15 | 8.48E-06 | 7.43E-14 | 3.05E-03 | 7.45E-04 | 5.77E-01 | 4.53E-06 |
| 236.99804 | 57.55  | 17.50 | 19.19 | 20.47 | 19.72 | 2.53E-22 | 1.04E-08 | 5.36E-14 | 3.52E-13 | 2.91E-05 | 2.38E-01 | 4.05E-02 |
| 237.01565 | 269.56 | 19.15 | 22.52 | 22.84 | 21.85 | 4.98E-50 | 3.65E-14 | 3.65E-14 | 3.65E-14 | 4.10E-01 | 1.08E-02 | 3.20E-05 |
| 237.01736 | 82.9   | 13.66 | 17.05 | 16.72 | 16.86 | 1.07E-15 | 6.31E-13 | 4.08E-11 | 2.71E-11 | 8.76E-01 | 9.76E-01 | 9.89E-01 |
| 237.021   | 27.11  | 14.11 | 13.34 | 13.40 | 15.31 | 2.48E-11 | 2.51E-02 | 4.21E-02 | 1.46E-04 | 9.97E-01 | 4.16E-10 | 9.51E-10 |
| 237.02816 | 86.28  | 18.37 | 15.60 | 15.83 | 16.57 | 8.00E-22 | 7.37E-14 | 7.36E-14 | 4.12E-09 | 8.51E-01 | 4.68E-03 | 4.56E-02 |
| 237.03617 | 204.53 | 16.49 | 18.00 | 17.97 | 18.54 | 1.28E-12 | 1.45E-07 | 1.72E-07 | 3.24E-12 | 1.00E+00 | 2.01E-01 | 1.65E-01 |
| 237.04986 | 72.87  | 16.14 | 16.04 | 14.41 | 15.79 | 2.19E-06 | 9.92E-01 | 5.29E-06 | 7.64E-01 | 4.02E-05 | 9.07E-01 | 9.96E-04 |
| 237.11687 | 26.3   | 23.39 | 23.57 | 23.26 | 23.45 | 8.32E-01 | 9.46E-01 | 9.79E-01 | 9.98E-01 | 7.92E-01 | 9.86E-01 | 9.46E-01 |
| 237.12566 | 290.23 | 18.05 | 15.81 | 16.24 | 15.32 | 4.56E-16 | 2.62E-11 | 5.70E-08 | 7.96E-14 | 5.11E-01 | 4.33E-01 | 2.30E-02 |
| 237.14838 | 277.61 | 17.58 | 15.98 | 16.12 | 16.36 | 3.18E-14 | 1.31E-12 | 5.51E-11 | 1.56E-07 | 9.06E-01 | 2.79E-01 | 6.58E-01 |
| 237.14851 | 173.75 | 17.76 | 15.58 | 15.90 | 16.60 | 1.06E-18 | 7.52E-14 | 1.86E-13 | 8.48E-06 | 5.13E-01 | 2.16E-04 | 2.12E-02 |
| 237.18464 | 23.2   | 17.18 | 14.48 | 15.07 | 15.70 | 2.79E-41 | 3.65E-14 | 3.65E-14 | 7.64E-14 | 2.24E-03 | 7.02E-11 | 1.46E-03 |
| 237.18481 | 285.59 | 17.91 | 16.68 | 16.62 | 16.71 | 2.43E-11 | 1.73E-08 | 2.18E-09 | 7.80E-08 | 9.90E-01 | 9.99E-01 | 9.75E-01 |
| 237.22101 | 24.36  | 18.97 | 17.52 | 17.30 | 17.92 | 7.75E-26 | 7.41E-14 | 4.19E-14 | 9.82E-11 | 4.20E-01 | 4.81E-02 | 3.10E-04 |
| 237.22109 | 288.86 | 20.21 | 19.95 | 19.77 | 20.24 | 4.75E-01 | 8.60E-01 | 5.45E-01 | 1.00E+00 | 9.55E-01 | 8.42E-01 | 5.39E-01 |
| 237.53519 | 73.49  | 14.21 | 14.30 | 14.77 | 15.85 | 2.32E-04 | 9.96E-01 | 4.57E-01 | 2.69E-04 | 6.25E-01 | 1.00E-03 | 3.98E-02 |
| 237.55694 | 95.98  | 14.62 | 15.55 | 16.18 | 15.74 | 6.03E-10 | 3.19E-04 | 2.05E-10 | 1.34E-05 | 3.40E-02 | 8.44E-01 | 2.58E-01 |
| 237.63719 | 60.81  | 14.66 | 14.04 | 15.10 | 14.17 | 1.80E-02 | 3.15E-01 | 5.82E-01 | 5.40E-01 | 2.06E-02 | 9.88E-01 | 6.15E-02 |
| 237.64976 | 58.64  | 15.73 | 15.23 | 15.35 | 14.81 | 7.54E-02 | 4.45E-01 | 6.55E-01 | 4.21E-02 | 9.87E-01 | 6.50E-01 | 4.38E-01 |
| 237.66787 | 56.74  | 15.73 | 14.94 | 15.56 | 14.74 | 6.50E-02 | 2.32E-01 | 9.76E-01 | 9.52E-02 | 4.68E-01 | 9.67E-01 | 2.38E-01 |
| 237.90097 | 114.89 | 16.30 | 13.50 | 13.97 | 15.16 | 1.04E-12 | 6.79E-12 | 8.31E-09 | 1.54E-02 | 5.92E-01 | 2.12E-04 | 1.46E-02 |
| 237.94189 | 88.95  | 14.43 | 18.70 | 19.33 | 17.59 | 4.73E-31 | 4.76E-14 | 3.65E-14 | 1.74E-13 | 3.50E-01 | 2.89E-02 | 8.64E-05 |
| 237.9556  | 78.53  | 18.04 | 11.92 | 13.99 | 13.08 | 2.31E-19 | 7.25E-14 | 1.42E-09 | 1.14E-12 | 6.58E-03 | 2.87E-01 | 4.97E-01 |
| 237.97316 | 53.55  | 21.82 | 21.84 | 21.74 | 21.10 | 5.45E-05 | 1.00E+00 | 9.58E-01 | 1.79E-04 | 9.36E-01 | 2.06E-04 | 1.62E-03 |
| 237.9805  | 47.41  | 15.91 | 16.62 | 17.37 | 16.60 | 2.26E-05 | 6.44E-02 | 3.83E-06 | 9.48E-02 | 5.85E-02 | 1.00E+00 | 5.37E-02 |
| 237.99103 | 30.26  | 15.01 | 17.73 | 21.43 | 19.86 | 3.10E-51 | 1.13E-13 | 3.65E-14 | 3.65E-14 | 5.65E-14 | 1.96E-08 | 3.75E-05 |
| 238.00367 | 29.59  | 16.10 | 18.45 | 17.81 | 18.08 | 4.15E-30 | 3.65E-14 | 7.29E-14 | 7.03E-14 | 3.56E-03 | 2.10E-01 | 4.94E-01 |
| 238.01515 | 85.94  | 19.62 | 17.88 | 18.21 | 17.98 | 1.42E-13 | 9.46E-12 | 2.62E-08 | 3.53E-10 | 4.96E-01 | 9.77E-01 | 7.70E-01 |
| 238.01908 | 274.19 | 12.30 | 17.62 | 18.31 | 16.73 | 1.64E-54 | 3.65E-14 | 3.65E-14 | 3.65E-14 | 1.22E-01 | 2.98E-02 | 8.11E-06 |
| 238.03272 | 84.43  | 16.03 | 16.05 | 15.83 | 16.37 | 4.16E-02 | 9.99E-01 | 6.79E-01 | 2.33E-01 | 6.25E-01 | 3.17E-01 | 2.08E-02 |
| 238.03771 | 85.26  | 17.75 | 18.94 | 19.00 | 18.97 | 1.03E-21 | 7.47E-14 | 7.52E-14 | 7.54E-14 | 9.62E-01 | 9.94E-01 | 9.96E-01 |
| 238.04502 | 90.17  | 21.14 | 22.16 | 21.66 | 21.77 | 8.86E-15 | 7.43E-14 | 3.63E-05 | 1.13E-06 | 1.69E-04 | 7.25E-03 | 8.11E-01 |
| 238.05113 | 235.61 | 15.42 | 17.14 | 17.89 | 16.83 | 1.40E-28 | 7.45E-14 | 3.65E-14 | 3.36E-11 | 6.58E-04 | 3.97E-01 | 9.42E-07 |
| 238.05874 | 91.62  | 16.24 | 18.61 | 19.14 | 17.82 | 3.62E-37 | 3.72E-14 | 3.65E-14 | 3.12E-13 | 3.47E-02 | 8.13E-04 | 2.20E-09 |
| 238.09216 | 96.51  | 16.32 | 15.71 | 15.18 | 15.47 | 1.67E-08 | 5.28E-03 | 7.28E-09 | 4.42E-05 | 2.30E-02 | 5.72E-01 | 4.36E-01 |
| 238.09908 | 24.78  | 17.40 | 11.06 | 11.64 | 13.25 | 3.85E-70 | 3.65E-14 | 3.65E-14 | 3.65E-14 | 1.19E-01 | 3.07E-13 | 5.02E-08 |
| 238.10724 | 211.1  | 16.34 | 10.10 | 10.55 | 9.80  | 2.92E-35 | 3.67E-14 | 3.90E-14 | 3.65E-14 | 8.02E-01 | 9.37E-01 | 4.56E-01 |
| 238.12017 | 24.68  | 20.90 | 20.83 | 20.59 | 20.88 | 7.32E-01 | 9.96E-01 | 7.29E-01 | 1.00E+00 | 8.66E-01 | 9.98E-01 | 7.95E-01 |
| 238.13806 | 205.67 | 16.64 | 12.57 | 12.84 | 11.35 | 4.34E-21 | 2.20E-13 | 2.79E-12 | 7.16E-14 | 9.52E-01 | 1.00E-01 | 2.52E-02 |
| 238.14367 | 209.84 | 16.59 | 12.63 | 13.45 | 12.14 | 9.49E-18 | 2.33E-13 | 2.56E-09 | 7.56E-14 | 3.59E-01 | 7.76E-01 | 5.38E-02 |
| 238.18007 | 197.81 | 15.87 | 12.71 | 12.68 | 11.98 | 8.77E-13 | 2.16E-08 | 1.22E-08 | 1.93E-11 | 1.00E+00 | 5.35E-01 | 5.56E-01 |
| 238.22443 | 21.91  | 16.65 | 13.48 | 13.69 | 14.74 | 1.59E-50 | 3.65E-14 | 3.65E-14 | 6.58E-14 | 6.14E-01 | 3.24E-10 | 1.62E-07 |
| 238.22449 | 285.67 | 17.24 | 16.18 | 16.22 | 16.14 | 1.61E-06 | 4.14E-05 | 7.61E-05 | 3.46E-05 | 9.98E-01 | 9.99E-01 | 9.88E-01 |
| 238.47073 | 276.41 | 17.16 | 15.14 | 15.53 | 15.61 | 4.69E-08 | 9.28E-08 | 1.96E-05 | 1.07E-04 | 6.78E-01 | 5.64E-01 | 9.96E-01 |
| 238.49279 | 30.6   | 15.48 | 14.02 | 18.18 | 17.35 | 1.29E-29 | 4.54E-05 | 8.37E-14 | 2.02E-07 | 3.67E-14 | 7.56E-14 | 6.12E-02 |
| 238.52052 | 85.37  | 15.04 | 16.88 | 17.37 | 16.35 | 1.42E-18 | 2.91E-12 | 7.49E-14 | 1.39E-06 | 2.00E-01 | 1.59E-01 | 4.33E-04 |
| 238.56396 | 93.94  | 22.57 | 20.58 | 21.63 | 20.92 | 2.14E-19 | 7.44E-14 | 2.77E-05 | 5.55E-13 | 4.46E-06 | 3.89E-01 | 4.88E-03 |
| 238.62592 | 27.27  | 16.79 | 20.00 | 18.96 | 19.62 | 1.19E-39 | 3.65E-14 | 6.69E-14 | 3.65E-14 | 8.60E-06 | 2.96E-01 | 1.33E-02 |
| 238.84164 | 47.23  | 19.93 | 21.34 | 21.37 | 20.95 | 2.94E-29 | 4.19E-14 | 3.87E-14 | 1.68E-13 | 9.97E-01 | 1.23E-02 | 5.81E-03 |
| 238.88421 | 22.3   | 15.66 | 13.35 | 12.58 | 15.98 | 1.82E-09 | 4.12E-04 | 8.01E-07 | 9.50E-01 | 5.53E-01 | 1.25E-04 | 2.71E-07 |
| 238.894   | 279.25 | 19.80 | 14.14 | 14.46 | 15.27 | 5.86E-22 | 7.36E-14 | 7.27E-14 | 1.76E-12 | 9.43E-01 | 2.38E-01 | 5.31E-01 |

|           |        |       |       |       |       |          |          |          |          |          |          |          |
|-----------|--------|-------|-------|-------|-------|----------|----------|----------|----------|----------|----------|----------|
| 238.89411 | 126.44 | 18.47 | 12.67 | 13.69 | 13.30 | 9.14E-38 | 3.65E-14 | 3.81E-14 | 3.67E-14 | 5.98E-02 | 4.32E-01 | 7.88E-01 |
| 238.901   | 108.96 | 13.46 | 11.38 | 14.37 | 13.23 | 1.35E-06 | 5.08E-04 | 2.95E-01 | 9.75E-01 | 3.72E-07 | 4.99E-03 | 1.65E-01 |
| 238.92885 | 301.92 | 15.97 | 15.65 | 12.90 | 13.29 | 1.20E-13 | 8.94E-01 | 1.50E-10 | 7.20E-08 | 2.65E-08 | 4.93E-06 | 8.33E-01 |
| 238.93932 | 90.67  | 15.79 | 18.99 | 19.56 | 18.22 | 6.24E-32 | 4.74E-14 | 3.65E-14 | 1.01E-13 | 1.95E-01 | 4.76E-02 | 4.77E-05 |
| 238.95251 | 128.16 | 17.95 | 15.13 | 15.03 | 16.78 | 1.13E-19 | 7.74E-14 | 7.45E-14 | 2.50E-03 | 9.89E-01 | 1.32E-05 | 2.58E-06 |
| 238.9626  | 276.08 | 18.16 | 18.14 | 18.22 | 18.24 | 9.70E-01 | 1.00E+00 | 9.94E-01 | 9.86E-01 | 9.85E-01 | 9.74E-01 | 1.00E+00 |
| 238.97525 | 56.58  | 18.02 | 17.47 | 17.68 | 17.23 | 3.24E-03 | 5.19E-02 | 3.59E-01 | 1.81E-03 | 7.90E-01 | 6.82E-01 | 1.81E-01 |
| 239.006   | 25.05  | 14.44 | 16.21 | 14.68 | 15.86 | 1.40E-12 | 2.06E-10 | 7.80E-01 | 7.87E-07 | 8.16E-08 | 5.61E-01 | 8.41E-05 |
| 239.01671 | 86.35  | 18.25 | 20.04 | 20.61 | 20.24 | 2.71E-38 | 4.56E-14 | 3.65E-14 | 3.72E-14 | 2.66E-03 | 6.23E-01 | 1.15E-01 |
| 239.03178 | 202.34 | 13.82 | 15.51 | 15.58 | 15.35 | 6.60E-11 | 1.71E-08 | 2.99E-09 | 8.12E-07 | 9.95E-01 | 9.41E-01 | 8.46E-01 |
| 239.04894 | 73.09  | 16.79 | 20.50 | 16.52 | 16.58 | 1.04E-67 | 3.65E-14 | 3.76E-01 | 6.42E-01 | 3.65E-14 | 3.65E-14 | 9.83E-01 |
| 239.05757 | 98.11  | 14.72 | 15.24 | 16.02 | 15.29 | 2.20E-03 | 4.02E-01 | 6.72E-04 | 3.45E-01 | 1.09E-01 | 9.99E-01 | 1.65E-01 |
| 239.06562 | 86.18  | 19.80 | 17.47 | 18.59 | 18.10 | 1.19E-22 | 5.10E-14 | 7.89E-08 | 3.75E-13 | 1.50E-06 | 2.34E-02 | 1.01E-01 |
| 239.09516 | 24.57  | 14.01 | 14.17 | 11.89 | 15.69 | 5.63E-15 | 9.78E-01 | 1.38E-06 | 3.57E-04 | 4.66E-07 | 2.39E-03 | 7.43E-14 |
| 239.10275 | 206.53 | 17.22 | 13.02 | 13.02 | 13.39 | 1.44E-30 | 4.12E-14 | 3.94E-14 | 7.01E-14 | 1.00E+00 | 7.67E-01 | 7.61E-01 |
| 239.10366 | 35.06  | 18.87 | 16.70 | 16.96 | 17.30 | 4.23E-29 | 3.72E-14 | 5.74E-14 | 7.61E-14 | 4.59E-01 | 7.48E-03 | 2.59E-01 |
| 239.11368 | 80.14  | 16.02 | 16.18 | 15.81 | 16.17 | 5.45E-01 | 9.33E-01 | 8.76E-01 | 9.53E-01 | 5.58E-01 | 1.00E+00 | 6.14E-01 |
| 239.12349 | 24.33  | 17.63 | 15.80 | 15.71 | 17.14 | 1.16E-32 | 4.23E-14 | 3.72E-14 | 1.52E-02 | 9.45E-01 | 2.79E-13 | 7.78E-14 |
| 239.12765 | 25.17  | 16.44 | 17.65 | 17.15 | 17.41 | 2.65E-14 | 1.19E-13 | 9.11E-06 | 2.47E-09 | 4.69E-03 | 4.09E-01 | 3.08E-01 |
| 239.1277  | 173.61 | 16.89 | 14.61 | 14.43 | 15.24 | 7.73E-38 | 3.65E-14 | 3.65E-14 | 7.48E-14 | 7.24E-01 | 2.49E-03 | 3.93E-05 |
| 239.14887 | 23.7   | 19.69 | 14.42 | 15.02 | 16.02 | 2.39E-65 | 3.65E-14 | 3.65E-14 | 3.65E-14 | 4.83E-02 | 1.05E-09 | 2.14E-04 |
| 239.16388 | 24.26  | 18.82 | 17.53 | 18.22 | 18.49 | 8.29E-07 | 2.33E-07 | 3.96E-02 | 4.74E-01 | 1.72E-02 | 5.39E-04 | 6.81E-01 |
| 239.16408 | 275.33 | 17.95 | 16.54 | 16.47 | 16.93 | 1.23E-18 | 8.16E-14 | 7.33E-14 | 2.79E-08 | 9.77E-01 | 1.09E-01 | 3.86E-02 |
| 239.20039 | 286.72 | 17.50 | 16.40 | 16.26 | 16.43 | 2.30E-09 | 1.19E-06 | 2.25E-08 | 4.12E-06 | 8.98E-01 | 9.99E-01 | 8.55E-01 |
| 239.23666 | 23.82  | 18.88 | 15.74 | 16.24 | 16.60 | 9.79E-59 | 3.65E-14 | 3.65E-14 | 3.65E-14 | 5.01E-03 | 3.89E-07 | 8.76E-02 |
| 239.23673 | 282.5  | 19.02 | 17.06 | 17.07 | 16.60 | 5.83E-14 | 3.54E-09 | 2.85E-09 | 1.56E-12 | 1.00E+00 | 4.77E-01 | 4.56E-01 |
| 239.48727 | 92.26  | 16.16 | 16.09 | 16.87 | 16.01 | 1.53E-04 | 9.88E-01 | 2.70E-03 | 8.97E-01 | 1.32E-03 | 9.82E-01 | 4.48E-04 |
| 239.5531  | 27.46  | 16.43 | 18.46 | 15.46 | 15.44 | 2.18E-97 | 3.65E-14 | 4.34E-14 | 4.76E-14 | 3.65E-14 | 3.65E-14 | 9.98E-01 |
| 239.56638 | 87.77  | 17.21 | 12.07 | 15.54 | 13.94 | 3.80E-36 | 3.65E-14 | 5.41E-06 | 7.36E-14 | 7.26E-14 | 1.68E-06 | 4.23E-05 |
| 239.63389 | 30.31  | 12.86 | 18.32 | 17.47 | 17.30 | 4.82E-68 | 3.65E-14 | 3.65E-14 | 3.65E-14 | 1.60E-03 | 1.69E-04 | 8.94E-01 |
| 239.92004 | 105.4  | 16.15 | 16.25 | 14.09 | 16.73 | 7.13E-25 | 9.66E-01 | 7.41E-14 | 5.47E-02 | 7.43E-14 | 1.79E-01 | 5.14E-14 |
| 239.96713 | 24.74  | 19.67 | 22.53 | 22.41 | 21.87 | 2.35E-65 | 3.65E-14 | 3.65E-14 | 3.65E-14 | 7.82E-01 | 9.95E-06 | 4.20E-04 |
| 239.98757 | 30.88  | 15.12 | 12.39 | 17.30 | 14.97 | 1.54E-32 | 9.38E-14 | 4.06E-10 | 9.71E-01 | 3.65E-14 | 5.08E-12 | 3.16E-10 |
| 240.00242 | 20.29  | 13.92 | 17.62 | 15.05 | 16.09 | 2.39E-42 | 3.65E-14 | 1.07E-06 | 7.61E-14 | 4.03E-14 | 4.54E-10 | 2.97E-05 |
| 240.01773 | 84.86  | 15.50 | 15.52 | 16.13 | 16.29 | 1.05E-09 | 9.98E-01 | 2.99E-05 | 2.95E-07 | 1.19E-04 | 1.56E-06 | 6.84E-01 |
| 240.02837 | 89.71  | 17.57 | 15.96 | 16.70 | 16.15 | 3.50E-11 | 1.55E-10 | 9.32E-04 | 3.83E-08 | 9.96E-03 | 8.64E-01 | 1.04E-01 |
| 240.05355 | 108.83 | 15.21 | 12.85 | 17.47 | 19.02 | 1.28E-61 | 7.52E-14 | 7.48E-14 | 3.65E-14 | 3.65E-14 | 3.65E-14 | 1.30E-07 |
| 240.06513 | 96.13  | 21.88 | 18.96 | 19.83 | 19.19 | 4.22E-35 | 3.65E-14 | 7.25E-14 | 3.67E-14 | 3.24E-04 | 7.15E-01 | 1.88E-02 |
| 240.08662 | 268.64 | 17.40 | 15.57 | 15.33 | 16.07 | 1.42E-14 | 7.11E-11 | 2.06E-13 | 5.23E-06 | 7.91E-01 | 2.50E-01 | 3.02E-02 |
| 240.09936 | 48.88  | 21.63 | 22.54 | 21.79 | 22.20 | 5.77E-08 | 1.07E-07 | 7.39E-01 | 2.93E-03 | 2.45E-05 | 1.53E-01 | 6.59E-02 |
| 240.1078  | 114.35 | 14.77 | 14.14 | 14.48 | 14.70 | 1.66E-01 | 1.48E-01 | 7.59E-01 | 9.96E-01 | 6.74E-01 | 2.82E-01 | 8.96E-01 |
| 240.12296 | 174.62 | 17.29 | 14.10 | 14.31 | 15.28 | 3.03E-39 | 3.65E-14 | 3.65E-14 | 7.43E-14 | 7.72E-01 | 2.20E-06 | 1.22E-04 |
| 240.15212 | 30.74  | 16.23 | 8.81  | 9.99  | 10.01 | 2.97E-60 | 3.65E-14 | 3.65E-14 | 3.65E-14 | 5.33E-03 | 6.51E-03 | 1.00E+00 |
| 240.1593  | 174.45 | 17.78 | 15.04 | 15.20 | 15.68 | 3.28E-42 | 3.65E-14 | 3.65E-14 | 4.21E-14 | 8.31E-01 | 3.54E-03 | 4.07E-02 |
| 240.15933 | 275.68 | 17.47 | 14.98 | 14.80 | 15.89 | 5.97E-24 | 7.47E-14 | 6.41E-14 | 1.88E-08 | 8.99E-01 | 3.33E-03 | 2.34E-04 |
| 240.16954 | 46.97  | 16.95 | 16.67 | 16.52 | 16.45 | 2.75E-02 | 3.78E-01 | 6.72E-02 | 2.93E-02 | 8.44E-01 | 6.37E-01 | 9.80E-01 |
| 240.23202 | 27.21  | 15.91 | 14.37 | 13.75 | 15.98 | 4.23E-04 | 6.01E-02 | 2.38E-03 | 9.99E-01 | 7.47E-01 | 6.41E-02 | 3.23E-03 |
| 240.24001 | 23.7   | 16.49 | 8.27  | 10.10 | 10.44 | 1.58E-34 | 3.65E-14 | 4.98E-14 | 7.07E-14 | 1.02E-02 | 2.12E-03 | 9.39E-01 |
| 240.49509 | 95.96  | 14.84 | 14.14 | 15.28 | 13.95 | 5.18E-05 | 8.74E-02 | 4.54E-01 | 1.81E-02 | 1.36E-03 | 9.21E-01 | 1.62E-04 |
| 240.5039  | 86.96  | 15.82 | 17.21 | 17.19 | 17.23 | 3.56E-10 | 8.28E-08 | 9.21E-08 | 1.19E-07 | 1.00E+00 | 1.00E+00 | 9.99E-01 |
| 240.56059 | 88.3   | 16.91 | 12.76 | 14.57 | 13.88 | 2.55E-19 | 7.41E-14 | 1.17E-07 | 3.34E-11 | 1.15E-04 | 4.72E-02 | 3.68E-01 |
| 240.56684 | 95.43  | 18.88 | 15.76 | 16.08 | 16.01 | 8.07E-12 | 5.57E-10 | 1.87E-08 | 2.80E-08 | 9.07E-01 | 9.56E-01 | 9.99E-01 |
| 240.83883 | 47.24  | 19.47 | 20.84 | 20.87 | 20.45 | 7.56E-28 | 5.03E-14 | 4.23E-14 | 9.45E-13 | 9.94E-01 | 1.33E-02 | 5.61E-03 |
| 240.88241 | 33.56  | 15.04 | 13.82 | 15.59 | 14.73 | 1.27E-03 | 2.73E-02 | 5.69E-01 | 9.01E-01 | 5.07E-04 | 1.96E-01 | 2.34E-01 |
| 240.97168 | 115.65 | 15.31 | 15.38 | 13.01 | 15.41 | 4.41E-05 | 9.99E-01 | 3.87E-04 | 9.98E-01 | 3.93E-04 | 1.00E+00 | 4.76E-04 |
| 240.97752 | 307.8  | 14.65 | 14.78 | 14.00 | 14.49 | 7.17E-04 | 9.13E-01 | 4.40E-03 | 8.39E-01 | 6.49E-04 | 4.83E-01 | 8.11E-02 |
| 240.99597 | 86.31  | 16.13 | 17.87 | 17.61 | 17.21 | 3.39E-17 | 7.45E-14 | 1.50E-12 | 5.99E-07 | 5.43E-01 | 7.26E-03 | 2.00E-01 |
| 240.99971 | 30.84  | 14.40 | 17.11 | 17.70 | 16.78 | 2.60E-64 | 3.65E-14 | 3.65E-14 | 3.65E-14 | 3.17E-04 | 1.17E-01 | 1.13E-08 |
| 241.01195 | 60.08  | 18.71 | 19.05 | 19.76 | 19.19 | 7.72E-09 | 1.38E-01 | 1.18E-09 | 1.82E-02 | 1.23E-04 | 8.43E-01 | 4.26E-03 |
| 241.03113 | 169.63 | 19.48 | 17.53 | 18.26 | 20.22 | 6.18E-06 | 1.34E-03 | 8.71E-02 | 5.10E-01 | 5.24E-01 | 1.24E-05 | 2.33E-03 |
| 241.04401 | 86.75  | 15.78 | 16.57 | 16.16 | 16.15 | 1.47E-04 | 3.05E-05 | 9.96E-02 | 1.37E-01 | 9.41E-02 | 9.73E-02 | 1.00E+00 |
| 241.04874 | 253.2  | 16.16 | 18.18 | 17.36 | 16.58 | 1.35E-04 | 1.01E-04 | 4.50E-02 | 8.16E-01 | 3.02E-01 | 6.18E-03 | 3.68E-01 |
| 241.05676 | 94.42  | 15.26 | 9.05  | 11.88 | 14.29 | 4.56E-23 | 5.74E-14 | 3.37E-08 | 3.41E-01 | 9.10E-06 | 7.61E-14 | 3.51E-04 |
| 241.06797 | 89.73  | 16.88 | 13.35 | 14.42 | 15.18 | 2.59E-16 | 7.42E-14 | 2.71E-09 | 1.21E-04 | 3.16E-02 | 5.02E-05 | 2.29E-01 |
| 241.07232 | 81.24  | 18.36 | 17.61 | 18.35 | 17.44 | 3.60E-03 | 6.76E-02 | 1.00E+00 | 1.87E-02 | 8.46E-02 | 9.54E-01 | 2.49E-02 |
| 241.08048 | 69.88  | 16.48 | 16.28 | 16.47 | 16.40 | 9.33E-01 | 9.29E-01 | 1.00E+00 | 9.95E-01 | 9.47E-01 | 9.86E-01 | 9.98E-01 |
| 241.10368 | 45.36  | 17.28 | 18.45 | 17.73 | 18.27 | 4.59E-08 | 1.31E-07 | 1.13E-01 | 1.89E-05 | 3.21E-03 | 8.30E-01 | 5.52E-02 |
| 241.111   | 21.88  | 10.92 | 15.04 | 9.42  | 15.54 | 5.91E-28 | 2.25E-12 | 2.41E-02 | 1.00E-13 | 7.12E-14 | 8.12E-01 | 6.07E-14 |

|           |        |       |       |       |       |          |          |          |          |          |          |          |
|-----------|--------|-------|-------|-------|-------|----------|----------|----------|----------|----------|----------|----------|
| 241.11713 | 127.37 | 18.08 | 14.77 | 14.80 | 15.53 | 2.84E-42 | 3.65E-14 | 3.65E-14 | 4.50E-14 | 9.99E-01 | 5.58E-03 | 7.80E-03 |
| 241.12956 | 72.21  | 18.39 | 20.86 | 20.59 | 20.59 | 7.32E-23 | 7.41E-14 | 7.36E-14 | 7.44E-14 | 6.78E-01 | 7.15E-01 | 1.00E+00 |
| 241.14337 | 160.9  | 17.32 | 15.08 | 14.76 | 15.78 | 2.29E-37 | 3.65E-14 | 3.65E-14 | 7.75E-14 | 2.74E-01 | 8.49E-04 | 2.88E-07 |
| 241.15462 | 50.05  | 23.50 | 23.44 | 23.42 | 23.31 | 4.27E-01 | 9.62E-01 | 9.02E-01 | 3.45E-01 | 9.98E-01 | 6.57E-01 | 7.62E-01 |
| 241.17103 | 23.89  | 15.18 | 15.42 | 12.61 | 13.35 | 4.85E-35 | 6.61E-01 | 3.72E-14 | 9.91E-14 | 3.65E-14 | 7.43E-14 | 4.76E-03 |
| 241.17965 | 292.04 | 17.79 | 16.84 | 16.70 | 16.95 | 2.25E-09 | 8.13E-07 | 1.07E-08 | 2.72E-05 | 8.74E-01 | 9.35E-01 | 5.44E-01 |
| 241.19483 | 23.77  | 16.75 | 12.47 | 14.11 | 14.66 | 7.75E-30 | 3.65E-14 | 8.04E-14 | 1.89E-09 | 2.60E-06 | 8.91E-10 | 3.26E-01 |
| 241.19504 | 157.51 | 16.54 | 13.98 | 14.16 | 14.62 | 1.65E-22 | 7.32E-14 | 7.51E-14 | 9.01E-12 | 8.95E-01 | 7.61E-02 | 2.99E-01 |
| 241.21608 | 286.85 | 18.67 | 17.06 | 16.81 | 17.23 | 4.67E-14 | 5.31E-10 | 6.46E-13 | 7.33E-08 | 7.29E-01 | 8.97E-01 | 3.19E-01 |
| 241.50276 | 86.08  | 15.26 | 15.04 | 15.29 | 15.17 | 8.17E-01 | 8.55E-01 | 1.00E+00 | 9.90E-01 | 8.13E-01 | 9.69E-01 | 9.77E-01 |
| 241.55969 | 84.59  | 15.02 | 16.68 | 16.64 | 17.04 | 7.80E-20 | 2.92E-13 | 5.69E-13 | 7.49E-14 | 9.97E-01 | 3.58E-01 | 2.52E-01 |
| 241.57388 | 87.32  | 21.76 | 21.99 | 22.44 | 21.42 | 5.22E-02 | 9.16E-01 | 2.13E-01 | 7.93E-01 | 5.98E-01 | 4.35E-01 | 3.38E-02 |
| 241.94658 | 89.34  | 16.77 | 20.26 | 20.71 | 19.49 | 2.26E-37 | 3.65E-14 | 3.65E-14 | 7.21E-14 | 3.57E-01 | 3.33E-02 | 1.13E-04 |
| 241.99861 | 37.24  | 20.83 | 22.06 | 22.20 | 22.18 | 3.03E-50 | 3.65E-14 | 3.65E-14 | 3.65E-14 | 3.17E-01 | 4.79E-01 | 9.96E-01 |
| 242.0053  | 87.01  | 15.77 | 17.05 | 16.88 | 16.54 | 1.25E-06 | 2.32E-06 | 4.14E-05 | 1.20E-02 | 9.13E-01 | 2.12E-01 | 5.50E-01 |
| 242.01963 | 51.99  | 20.24 | 20.18 | 20.54 | 20.43 | 3.71E-05 | 8.50E-01 | 1.24E-03 | 1.11E-01 | 8.89E-05 | 1.82E-02 | 5.39E-01 |
| 242.03449 | 166.23 | 20.71 | 19.92 | 20.48 | 21.33 | 4.68E-03 | 1.38E-01 | 9.20E-01 | 3.46E-01 | 4.45E-01 | 1.85E-03 | 1.19E-01 |
| 242.03646 | 39.07  | 15.97 | 14.53 | 17.36 | 15.14 | 1.35E-20 | 8.35E-07 | 1.28E-06 | 1.41E-02 | 7.03E-14 | 1.28E-01 | 4.45E-13 |
| 242.0422  | 237.86 | 15.45 | 14.01 | 14.88 | 15.03 | 3.90E-05 | 1.05E-05 | 2.10E-01 | 5.00E-01 | 2.08E-02 | 6.60E-03 | 9.65E-01 |
| 242.05212 | 171.95 | 13.08 | 14.83 | 14.56 | 14.34 | 4.46E-12 | 2.51E-11 | 1.02E-08 | 3.65E-06 | 7.02E-01 | 2.11E-01 | 7.99E-01 |
| 242.06353 | 83.68  | 17.09 | 17.21 | 16.97 | 17.47 | 7.72E-02 | 9.09E-01 | 9.31E-01 | 1.84E-01 | 6.05E-01 | 5.48E-01 | 5.65E-02 |
| 242.07733 | 57.72  | 19.66 | 21.53 | 20.73 | 20.22 | 3.25E-17 | 7.52E-14 | 4.31E-07 | 2.83E-02 | 5.04E-04 | 6.58E-09 | 5.93E-02 |
| 242.10213 | 282.78 | 19.64 | 16.80 | 16.74 | 17.18 | 9.14E-16 | 1.63E-12 | 4.23E-13 | 1.99E-09 | 9.99E-01 | 7.63E-01 | 6.65E-01 |
| 242.12501 | 59.28  | 17.78 | 13.29 | 13.00 | 14.01 | 5.77E-29 | 5.18E-14 | 3.87E-14 | 7.26E-14 | 9.00E-01 | 3.21E-01 | 8.00E-02 |
| 242.13274 | 67.05  | 15.93 | 16.87 | 16.44 | 16.99 | 1.13E-04 | 9.76E-04 | 1.61E-01 | 2.42E-04 | 3.18E-01 | 9.71E-01 | 1.50E-01 |
| 242.13876 | 179.65 | 17.17 | 14.30 | 14.11 | 15.26 | 2.23E-41 | 3.65E-14 | 3.65E-14 | 7.47E-14 | 7.82E-01 | 3.29E-05 | 3.52E-07 |
| 242.15793 | 52.39  | 20.39 | 20.25 | 20.40 | 20.12 | 8.90E-02 | 6.60E-01 | 1.00E+00 | 1.28E-01 | 6.09E-01 | 7.24E-01 | 1.13E-01 |
| 242.1749  | 288.02 | 18.96 | 17.15 | 17.04 | 17.36 | 7.47E-14 | 1.31E-10 | 5.62E-12 | 2.80E-08 | 9.71E-01 | 8.76E-01 | 6.33E-01 |
| 242.2477  | 288.79 | 18.11 | 17.07 | 17.21 | 17.14 | 5.98E-05 | 2.25E-04 | 1.76E-03 | 9.78E-04 | 9.45E-01 | 9.94E-01 | 9.92E-01 |
| 242.50082 | 246.46 | 15.09 | 17.30 | 14.94 | 15.78 | 1.50E-05 | 7.73E-05 | 9.91E-01 | 5.22E-01 | 3.50E-05 | 2.22E-02 | 3.71E-01 |
| 242.50933 | 244.32 | 14.41 | 14.41 | 15.55 | 14.81 | 2.22E-07 | 1.00E+00 | 1.11E-06 | 2.61E-01 | 2.23E-06 | 2.72E-01 | 6.40E-03 |
| 242.5619  | 234.96 | 19.25 | 20.88 | 21.84 | 20.14 | 2.14E-21 | 4.06E-10 | 6.01E-14 | 1.73E-03 | 6.98E-04 | 1.98E-02 | 7.03E-10 |
| 242.57614 | 76.57  | 17.71 | 16.40 | 16.50 | 15.71 | 3.64E-13 | 6.28E-07 | 3.47E-06 | 1.95E-13 | 9.80E-01 | 3.21E-02 | 9.73E-03 |
| 242.64194 | 63.86  | 19.41 | 21.61 | 21.55 | 20.88 | 4.04E-32 | 3.67E-14 | 3.67E-14 | 1.23E-13 | 9.89E-01 | 4.94E-04 | 1.39E-03 |
| 242.83619 | 47.32  | 17.30 | 18.48 | 18.52 | 18.18 | 6.67E-28 | 5.30E-14 | 4.16E-14 | 1.92E-13 | 9.76E-01 | 4.23E-02 | 1.24E-02 |
| 242.92532 | 50.26  | 21.36 | 21.47 | 21.65 | 21.69 | 5.18E-03 | 6.90E-01 | 2.46E-02 | 9.05E-03 | 3.35E-01 | 1.75E-01 | 9.75E-01 |
| 242.94774 | 92.81  | 15.43 | 16.04 | 16.50 | 15.19 | 6.44E-04 | 2.50E-01 | 6.50E-03 | 8.92E-01 | 5.24E-01 | 7.19E-02 | 1.09E-03 |
| 242.96022 | 41.3   | 13.05 | 13.79 | 13.04 | 13.52 | 2.74E-01 | 3.45E-01 | 1.00E+00 | 7.31E-01 | 3.50E-01 | 9.40E-01 | 7.28E-01 |
| 242.96843 | 29.44  | 15.53 | 14.03 | 14.20 | 13.91 | 2.03E-09 | 2.59E-07 | 5.39E-06 | 5.69E-08 | 9.15E-01 | 9.74E-01 | 7.11E-01 |
| 242.98443 | 64.39  | 16.98 | 17.89 | 18.99 | 17.76 | 1.29E-24 | 5.07E-07 | 3.72E-14 | 4.02E-05 | 2.53E-09 | 8.70E-01 | 7.47E-11 |
| 242.99271 | 167.93 | 15.54 | 21.18 | 19.81 | 19.03 | 1.06E-15 | 7.63E-14 | 5.27E-10 | 1.19E-06 | 1.53E-01 | 8.17E-03 | 6.38E-01 |
| 243.01093 | 260.69 | 20.51 | 21.49 | 21.57 | 20.64 | 5.99E-11 | 4.37E-07 | 2.72E-08 | 8.87E-01 | 9.66E-01 | 5.04E-05 | 5.46E-06 |
| 243.02627 | 273.9  | 20.74 | 23.19 | 23.13 | 22.93 | 7.17E-19 | 7.78E-14 | 8.26E-14 | 3.70E-12 | 9.96E-01 | 8.10E-01 | 9.04E-01 |
| 243.03772 | 176.49 | 20.12 | 19.83 | 19.80 | 20.18 | 5.82E-01 | 8.12E-01 | 7.65E-01 | 9.98E-01 | 1.00E+00 | 7.38E-01 | 6.88E-01 |
| 243.04325 | 230.41 | 17.66 | 21.86 | 22.38 | 20.58 | 5.00E-41 | 3.65E-14 | 3.65E-14 | 7.38E-14 | 3.29E-01 | 3.65E-04 | 1.61E-07 |
| 243.06362 | 247.46 | 17.61 | 18.03 | 19.38 | 17.71 | 6.44E-19 | 1.13E-01 | 7.61E-14 | 9.49E-01 | 1.71E-10 | 3.78E-01 | 9.89E-14 |
| 243.07384 | 263.59 | 18.64 | 20.18 | 21.44 | 19.53 | 1.63E-21 | 3.05E-08 | 5.65E-14 | 4.24E-03 | 1.61E-05 | 7.28E-02 | 7.20E-11 |
| 243.08234 | 38.4   | 13.33 | 17.42 | 16.11 | 15.58 | 4.90E-14 | 8.67E-14 | 9.39E-08 | 4.45E-05 | 3.92E-02 | 1.91E-03 | 7.16E-01 |
| 243.09754 | 200.21 | 17.47 | 11.21 | 11.80 | 13.37 | 1.12E-54 | 3.65E-14 | 3.65E-14 | 3.67E-14 | 2.61E-01 | 3.40E-09 | 2.13E-05 |
| 243.10843 | 87.19  | 18.05 | 19.05 | 19.11 | 18.66 | 5.70E-06 | 6.73E-05 | 1.65E-05 | 4.25E-02 | 9.93E-01 | 3.41E-01 | 2.12E-01 |
| 243.12269 | 230.27 | 17.05 | 14.60 | 14.50 | 15.10 | 3.09E-30 | 4.16E-14 | 3.72E-14 | 7.56E-14 | 9.62E-01 | 1.05E-01 | 3.02E-02 |
| 243.12348 | 26.88  | 16.56 | 16.93 | 17.65 | 15.54 | 2.46E-06 | 7.43E-01 | 1.46E-02 | 3.42E-02 | 2.15E-01 | 2.19E-03 | 5.51E-07 |
| 243.13391 | 173.76 | 16.87 | 17.72 | 15.60 | 15.33 | 2.22E-27 | 1.72E-04 | 3.23E-09 | 4.64E-12 | 7.18E-14 | 4.74E-14 | 5.54E-01 |
| 243.13395 | 291.9  | 16.15 | 17.31 | 16.20 | 14.20 | 1.51E-17 | 6.71E-04 | 9.99E-01 | 4.85E-09 | 1.66E-03 | 7.27E-14 | 4.81E-09 |
| 243.14359 | 60.68  | 17.26 | 19.31 | 19.30 | 18.63 | 6.28E-28 | 4.52E-14 | 4.45E-14 | 9.82E-12 | 1.00E+00 | 1.90E-03 | 2.27E-03 |
| 243.15911 | 176.37 | 17.38 | 15.20 | 15.15 | 15.57 | 5.92E-33 | 3.70E-14 | 3.65E-14 | 7.27E-14 | 9.92E-01 | 1.92E-01 | 1.04E-01 |
| 243.17826 | 212.28 | 16.50 | 12.53 | 11.97 | 13.02 | 9.14E-11 | 8.04E-08 | 5.96E-10 | 5.60E-06 | 8.50E-01 | 9.04E-01 | 4.52E-01 |
| 243.18284 | 28.93  | 18.11 | 14.72 | 14.57 | 16.15 | 2.37E-39 | 3.65E-14 | 3.65E-14 | 4.07E-13 | 9.36E-01 | 2.30E-07 | 8.66E-09 |
| 243.1955  | 178.13 | 16.93 | 14.10 | 14.15 | 15.23 | 1.11E-36 | 3.65E-14 | 3.65E-14 | 2.08E-13 | 9.96E-01 | 1.72E-06 | 3.89E-06 |
| 243.21045 | 24.42  | 18.53 | 15.33 | 15.43 | 16.54 | 1.66E-60 | 3.65E-14 | 3.65E-14 | 3.67E-14 | 9.16E-01 | 8.31E-12 | 2.46E-10 |
| 243.21057 | 280.21 | 18.11 | 15.88 | 15.96 | 15.89 | 7.52E-16 | 2.57E-12 | 8.64E-12 | 9.27E-12 | 9.93E-01 | 1.00E+00 | 9.95E-01 |
| 243.21062 | 181.47 | 18.27 | 15.21 | 15.45 | 15.82 | 2.04E-39 | 3.65E-14 | 3.65E-14 | 4.32E-14 | 6.63E-01 | 2.76E-02 | 3.18E-01 |
| 243.49387 | 168.08 | 13.75 | 16.88 | 16.25 | 15.31 | 1.02E-09 | 1.34E-09 | 1.25E-06 | 7.81E-03 | 5.56E-01 | 9.80E-03 | 2.30E-01 |
| 243.50527 | 97.04  | 14.37 | 13.97 | 15.48 | 14.47 | 1.12E-07 | 3.79E-01 | 5.11E-05 | 9.76E-01 | 5.59E-08 | 2.24E-01 | 7.55E-04 |
| 243.51246 | 258.25 | 17.40 | 17.61 | 17.76 | 17.01 | 6.90E-04 | 6.33E-01 | 1.79E-01 | 1.37E-01 | 8.53E-01 | 7.90E-03 | 4.37E-04 |
| 243.51738 | 135.98 | 14.70 | 14.89 | 14.27 | 14.13 | 2.65E-02 | 9.00E-01 | 3.71E-01 | 1.70E-01 | 1.16E-01 | 4.28E-02 | 9.62E-01 |
| 243.54674 | 107.36 | 16.78 | 17.46 | 17.51 | 17.46 | 3.05E-04 | 3.05E-03 | 1.07E-03 | 3.98E-03 | 9.94E-01 | 1.00E+00 | 9.96E-01 |
| 243.55989 | 235.3  | 14.89 | 17.48 | 17.70 | 16.81 | 9.19E-15 | 1.70E-11 | 3.18E-13 | 1.37E-06 | 9.33E-01 | 2.70E-01 | 7.79E-02 |

|           |        |       |       |       |       |          |          |          |          |          |          |          |
|-----------|--------|-------|-------|-------|-------|----------|----------|----------|----------|----------|----------|----------|
| 243.56441 | 129.56 | 13.65 | 14.88 | 14.59 | 15.99 | 2.26E-08 | 2.94E-03 | 3.69E-02 | 2.93E-09 | 8.44E-01 | 1.63E-02 | 1.00E-03 |
| 243.57073 | 76.72  | 16.67 | 16.32 | 16.33 | 15.53 | 1.74E-02 | 7.31E-01 | 7.40E-01 | 8.33E-03 | 1.00E+00 | 1.46E-01 | 1.33E-01 |
| 243.64506 | 59.87  | 14.98 | 15.35 | 15.28 | 15.74 | 3.62E-02 | 4.34E-01 | 6.08E-01 | 1.71E-02 | 9.92E-01 | 4.65E-01 | 3.03E-01 |
| 243.91851 | 48.5   | 19.70 | 21.01 | 21.33 | 20.67 | 5.86E-14 | 2.52E-09 | 1.63E-13 | 2.52E-05 | 3.83E-01 | 3.78E-01 | 9.21E-03 |
| 243.92865 | 50.41  | 16.77 | 15.37 | 15.19 | 15.75 | 4.47E-12 | 4.45E-09 | 2.66E-11 | 4.46E-05 | 8.55E-01 | 3.61E-01 | 7.48E-02 |
| 243.94418 | 53.01  | 17.19 | 18.20 | 18.18 | 17.85 | 1.49E-11 | 6.39E-10 | 8.88E-10 | 1.40E-04 | 9.99E-01 | 1.20E-01 | 1.48E-01 |
| 243.99642 | 34.22  | 18.00 | 19.06 | 19.28 | 19.21 | 2.82E-27 | 7.53E-14 | 4.54E-14 | 6.85E-14 | 2.06E-01 | 5.61E-01 | 9.33E-01 |
| 244.01314 | 252.03 | 14.31 | 13.67 | 14.57 | 12.81 | 5.41E-07 | 1.61E-01 | 8.30E-01 | 2.26E-05 | 2.38E-02 | 4.56E-02 | 8.56E-07 |
| 244.01869 | 59.05  | 17.09 | 16.71 | 16.42 | 16.36 | 3.91E-06 | 5.91E-02 | 5.13E-05 | 1.55E-05 | 2.14E-01 | 1.03E-01 | 9.75E-01 |
| 244.0297  | 273.4  | 15.94 | 17.98 | 18.36 | 17.92 | 7.32E-13 | 1.02E-08 | 7.68E-12 | 6.47E-08 | 6.62E-01 | 9.98E-01 | 5.66E-01 |
| 244.04968 | 227.92 | 14.15 | 13.93 | 14.53 | 14.87 | 5.46E-01 | 9.87E-01 | 9.36E-01 | 7.06E-01 | 8.10E-01 | 5.30E-01 | 9.60E-01 |
| 244.06153 | 127.3  | 14.06 | 14.30 | 14.22 | 15.15 | 2.34E-03 | 8.29E-01 | 9.38E-01 | 1.68E-03 | 9.93E-01 | 3.18E-02 | 1.37E-02 |
| 244.06659 | 86.94  | 17.37 | 19.71 | 19.84 | 19.10 | 2.53E-28 | 5.12E-14 | 3.90E-14 | 2.67E-13 | 9.34E-01 | 3.19E-02 | 5.08E-03 |
| 244.08109 | 271.87 | 19.18 | 14.82 | 14.01 | 15.64 | 1.08E-31 | 5.12E-14 | 3.65E-14 | 7.55E-14 | 1.74E-01 | 1.94E-01 | 4.87E-04 |
| 244.09313 | 67.9   | 21.46 | 20.19 | 20.46 | 20.39 | 8.43E-20 | 7.54E-14 | 1.76E-12 | 5.98E-13 | 1.88E-01 | 4.40E-01 | 9.70E-01 |
| 244.11226 | 79.73  | 15.84 | 15.28 | 15.21 | 15.56 | 3.52E-01 | 4.76E-01 | 3.52E-01 | 8.92E-01 | 9.98E-01 | 9.08E-01 | 8.24E-01 |
| 244.11782 | 285.62 | 18.77 | 17.11 | 16.81 | 17.01 | 1.11E-10 | 4.85E-07 | 1.59E-09 | 1.99E-07 | 7.58E-01 | 9.90E-01 | 9.15E-01 |
| 244.12907 | 63.41  | 16.99 | 17.20 | 17.08 | 17.32 | 5.38E-01 | 7.91E-01 | 9.77E-01 | 4.99E-01 | 9.57E-01 | 9.62E-01 | 7.58E-01 |
| 244.13561 | 23.9   | 16.90 | 17.40 | 17.24 | 15.83 | 1.85E-06 | 2.93E-01 | 6.26E-01 | 1.91E-03 | 9.44E-01 | 2.75E-06 | 2.78E-05 |
| 244.1542  | 268.71 | 18.63 | 16.74 | 16.42 | 16.93 | 6.28E-32 | 5.14E-14 | 3.65E-14 | 7.43E-14 | 2.20E-01 | 7.11E-01 | 1.81E-02 |
| 244.16559 | 60.73  | 17.46 | 16.77 | 17.17 | 16.94 | 3.05E-03 | 2.12E-03 | 4.26E-01 | 4.04E-02 | 1.72E-01 | 8.43E-01 | 6.44E-01 |
| 244.19057 | 20.86  | 16.76 | 13.88 | 13.56 | 15.07 | 1.21E-31 | 4.16E-14 | 3.65E-14 | 8.73E-10 | 5.75E-01 | 4.44E-05 | 9.14E-08 |
| 244.19062 | 160.73 | 17.68 | 15.30 | 15.58 | 15.79 | 8.14E-28 | 3.94E-14 | 7.03E-14 | 7.47E-14 | 5.18E-01 | 9.64E-02 | 7.49E-01 |
| 244.22684 | 23.21  | 15.43 | 12.38 | 13.15 | 14.34 | 2.56E-13 | 6.30E-13 | 5.02E-08 | 3.01E-02 | 2.02E-01 | 1.58E-05 | 1.91E-02 |
| 244.26332 | 22.61  | 16.26 | 13.53 | 14.54 | 14.14 | 3.51E-17 | 7.43E-14 | 5.62E-08 | 9.72E-11 | 4.85E-03 | 2.07E-01 | 5.54E-01 |
| 244.42982 | 298.24 | 17.32 | 17.21 | 16.34 | 18.23 | 2.20E-10 | 9.66E-01 | 4.12E-04 | 1.80E-03 | 3.61E-03 | 5.24E-04 | 1.75E-11 |
| 244.50719 | 93.23  | 18.10 | 11.82 | 12.54 | 12.85 | 2.44E-47 | 3.65E-14 | 3.65E-14 | 3.65E-14 | 2.17E-01 | 3.88E-02 | 8.45E-01 |
| 244.51126 | 307.52 | 14.59 | 14.84 | 13.46 | 12.85 | 3.03E-14 | 7.56E-01 | 4.08E-05 | 4.95E-10 | 9.29E-07 | 6.83E-12 | 9.49E-02 |
| 244.54544 | 92.64  | 18.00 | 16.20 | 17.41 | 17.34 | 4.15E-16 | 7.55E-14 | 1.13E-02 | 4.81E-03 | 1.74E-08 | 3.31E-07 | 9.84E-01 |
| 244.56983 | 80.66  | 15.34 | 17.35 | 16.42 | 17.39 | 1.12E-14 | 2.69E-12 | 2.28E-04 | 3.62E-12 | 3.56E-03 | 9.99E-01 | 2.89E-03 |
| 244.72545 | 300.02 | 15.15 | 15.83 | 16.26 | 16.36 | 2.81E-07 | 1.23E-02 | 5.66E-06 | 1.56E-06 | 2.45E-01 | 1.16E-01 | 9.72E-01 |
| 244.78676 | 46.19  | 20.03 | 20.24 | 20.38 | 19.84 | 6.48E-06 | 1.84E-01 | 3.90E-03 | 2.67E-01 | 5.30E-01 | 1.72E-03 | 6.30E-06 |
| 244.86742 | 21.53  | 17.77 | 10.98 | 11.53 | 12.08 | 1.06E-98 | 3.65E-14 | 3.65E-14 | 3.65E-14 | 3.01E-02 | 1.56E-06 | 4.27E-02 |
| 244.90398 | 25.93  | 19.05 | 16.14 | 16.83 | 16.98 | 1.92E-66 | 3.65E-14 | 3.65E-14 | 3.65E-14 | 1.73E-07 | 8.29E-10 | 6.39E-01 |
| 244.92338 | 50.47  | 17.37 | 17.16 | 17.36 | 17.57 | 4.69E-02 | 4.15E-01 | 1.00E+00 | 4.57E-01 | 4.75E-01 | 2.24E-02 | 4.40E-01 |
| 244.9476  | 55.36  | 18.30 | 15.11 | 16.23 | 15.60 | 1.09E-28 | 3.67E-14 | 1.57E-13 | 7.14E-14 | 1.22E-04 | 2.59E-01 | 8.20E-02 |
| 245.00861 | 82.5   | 16.01 | 20.19 | 20.36 | 18.46 | 1.08E-31 | 3.76E-14 | 3.65E-14 | 1.85E-10 | 9.57E-01 | 1.95E-05 | 1.58E-06 |
| 245.01459 | 53.49  | 17.22 | 17.81 | 17.35 | 17.37 | 6.93E-02 | 5.04E-02 | 9.39E-01 | 9.23E-01 | 2.03E-01 | 2.61E-01 | 1.00E+00 |
| 245.04146 | 231.4  | 15.84 | 18.75 | 18.82 | 17.53 | 4.56E-16 | 4.21E-13 | 1.40E-13 | 4.89E-05 | 9.98E-01 | 9.68E-03 | 4.95E-03 |
| 245.04808 | 63.98  | 14.84 | 13.00 | 13.23 | 13.43 | 4.95E-03 | 6.42E-03 | 2.06E-02 | 6.98E-02 | 9.79E-01 | 8.88E-01 | 9.86E-01 |
| 245.0597  | 59.64  | 17.92 | 19.13 | 18.65 | 18.14 | 4.15E-04 | 3.87E-04 | 6.30E-02 | 8.94E-01 | 4.08E-01 | 9.90E-03 | 3.45E-01 |
| 245.06065 | 261.62 | 19.86 | 21.95 | 21.52 | 20.19 | 1.96E-20 | 7.48E-14 | 6.44E-12 | 4.73E-01 | 2.32E-01 | 8.82E-12 | 2.05E-07 |
| 245.06873 | 84.18  | 15.48 | 15.98 | 15.56 | 16.61 | 1.36E-07 | 5.07E-02 | 9.74E-01 | 2.87E-07 | 1.53E-01 | 1.40E-02 | 3.83E-06 |
| 245.07939 | 50.87  | 18.09 | 15.63 | 16.62 | 17.81 | 1.71E-23 | 6.29E-14 | 2.30E-09 | 6.25E-01 | 1.72E-04 | 7.45E-14 | 6.64E-06 |
| 245.09624 | 48.36  | 17.94 | 15.86 | 16.62 | 16.59 | 4.23E-11 | 1.03E-11 | 1.79E-05 | 2.37E-05 | 4.02E-02 | 6.54E-02 | 1.00E+00 |
| 245.11352 | 271.97 | 17.44 | 15.17 | 15.06 | 15.80 | 4.10E-25 | 7.18E-14 | 5.76E-14 | 2.24E-11 | 9.67E-01 | 3.23E-02 | 7.81E-03 |
| 245.12137 | 204.09 | 15.73 | 8.52  | 12.13 | 12.54 | 2.94E-27 | 3.65E-14 | 1.15E-09 | 2.04E-07 | 3.64E-09 | 2.22E-10 | 8.94E-01 |
| 245.13823 | 179.16 | 17.19 | 14.28 | 14.55 | 15.05 | 1.26E-40 | 3.65E-14 | 3.65E-14 | 5.47E-14 | 5.01E-01 | 8.06E-04 | 5.63E-02 |
| 245.13915 | 28.15  | 17.63 | 18.20 | 17.96 | 17.16 | 1.15E-04 | 5.04E-02 | 4.36E-01 | 1.62E-01 | 7.09E-01 | 7.64E-05 | 3.65E-03 |
| 245.15308 | 191.85 | 16.81 | 13.52 | 14.33 | 14.87 | 1.52E-38 | 3.65E-14 | 3.76E-14 | 7.45E-14 | 9.39E-04 | 1.57E-08 | 5.96E-02 |
| 245.18579 | 26.44  | 17.44 | 17.79 | 17.78 | 17.78 | 1.00E-01 | 1.59E-01 | 1.70E-01 | 2.04E-01 | 1.00E+00 | 1.00E+00 | 1.00E+00 |
| 245.18964 | 24.52  | 16.91 | 12.71 | 14.71 | 15.87 | 2.73E-25 | 3.81E-14 | 4.93E-09 | 1.89E-02 | 2.67E-07 | 8.25E-14 | 9.00E-03 |
| 245.22608 | 23.83  | 19.31 | 17.56 | 17.83 | 18.36 | 4.31E-26 | 4.12E-14 | 7.26E-14 | 1.41E-08 | 2.91E-01 | 4.08E-06 | 3.99E-03 |
| 245.22614 | 290.75 | 19.95 | 18.54 | 18.56 | 18.58 | 1.76E-06 | 3.34E-05 | 3.88E-05 | 1.02E-04 | 1.00E+00 | 9.99E-01 | 1.00E+00 |
| 245.22631 | 170.88 | 19.54 | 18.30 | 18.50 | 18.44 | 1.71E-07 | 9.44E-07 | 4.43E-05 | 3.08E-05 | 8.30E-01 | 9.35E-01 | 9.95E-01 |
| 245.39465 | 299.65 | 13.85 | 15.11 | 14.69 | 14.48 | 6.93E-07 | 1.90E-07 | 8.24E-04 | 2.74E-02 | 2.49E-01 | 3.81E-02 | 8.04E-01 |
| 245.54585 | 100.6  | 16.49 | 15.74 | 16.18 | 15.76 | 2.68E-04 | 7.70E-04 | 3.66E-01 | 1.88E-03 | 1.20E-01 | 9.99E-01 | 1.80E-01 |
| 245.55762 | 84.11  | 14.03 | 17.50 | 17.10 | 16.75 | 2.48E-38 | 3.65E-14 | 3.65E-14 | 4.81E-14 | 3.40E-01 | 1.44E-02 | 4.86E-01 |
| 245.56247 | 263.38 | 17.22 | 19.44 | 18.22 | 17.57 | 2.62E-24 | 4.36E-14 | 1.62E-06 | 2.82E-01 | 1.50E-08 | 7.59E-14 | 7.07E-03 |
| 245.58763 | 25.93  | 15.61 | 17.13 | 14.47 | 16.65 | 4.79E-15 | 8.67E-06 | 1.23E-03 | 6.60E-03 | 9.65E-14 | 4.40E-01 | 7.56E-10 |
| 245.6155  | 27.68  | 15.22 | 18.50 | 17.29 | 17.69 | 2.22E-46 | 3.65E-14 | 4.16E-14 | 3.65E-14 | 1.24E-09 | 1.56E-04 | 1.33E-01 |
| 245.91555 | 270.02 | 19.79 | 12.21 | 11.89 | 14.43 | 4.47E-36 | 3.65E-14 | 3.65E-14 | 7.38E-14 | 9.45E-01 | 1.42E-03 | 1.52E-04 |
| 245.91557 | 43.93  | 18.70 | 19.63 | 19.92 | 19.34 | 1.53E-15 | 9.19E-10 | 7.58E-14 | 5.40E-05 | 1.75E-01 | 2.13E-01 | 5.93E-04 |
| 245.95373 | 61.26  | 18.64 | 17.52 | 19.11 | 17.84 | 2.08E-11 | 5.72E-06 | 1.45E-01 | 3.10E-03 | 1.96E-10 | 5.23E-01 | 8.42E-07 |
| 245.96821 | 88.45  | 16.58 | 21.68 | 21.84 | 20.22 | 2.41E-49 | 3.65E-14 | 3.65E-14 | 4.03E-14 | 9.56E-01 | 3.22E-05 | 2.70E-06 |
| 245.9947  | 20.77  | 13.42 | 11.95 | 13.56 | 12.71 | 1.61E-07 | 4.00E-06 | 9.63E-01 | 7.89E-02 | 7.56E-07 | 6.25E-02 | 2.79E-02 |
| 246.00995 | 87.91  | 11.13 | 15.86 | 16.10 | 14.28 | 2.41E-24 | 7.39E-14 | 6.29E-14 | 1.48E-09 | 9.57E-01 | 7.40E-03 | 1.20E-03 |
| 246.02379 | 76.53  | 17.07 | 14.23 | 15.31 | 14.75 | 1.81E-14 | 1.20E-13 | 2.22E-06 | 1.21E-09 | 1.20E-02 | 4.85E-01 | 3.94E-01 |

|           |        |       |       |       |       |          |          |          |          |          |          |          |
|-----------|--------|-------|-------|-------|-------|----------|----------|----------|----------|----------|----------|----------|
| 246.03786 | 85.36  | 14.57 | 16.32 | 15.54 | 15.98 | 5.15E-05 | 3.78E-05 | 5.11E-02 | 1.99E-03 | 1.84E-01 | 8.31E-01 | 6.82E-01 |
| 246.04743 | 101.16 | 18.89 | 19.41 | 19.81 | 18.84 | 2.22E-05 | 7.36E-02 | 1.38E-04 | 9.97E-01 | 2.76E-01 | 6.22E-02 | 1.63E-04 |
| 246.06305 | 255.75 | 13.31 | 16.03 | 16.17 | 14.40 | 2.97E-17 | 4.23E-13 | 8.94E-14 | 1.05E-02 | 9.76E-01 | 5.32E-05 | 7.29E-06 |
| 246.06385 | 81.33  | 15.63 | 15.64 | 15.75 | 16.27 | 4.46E-04 | 1.00E+00 | 8.64E-01 | 7.42E-04 | 8.90E-01 | 1.32E-03 | 1.27E-02 |
| 246.07949 | 48.24  | 16.19 | 16.17 | 16.19 | 17.00 | 2.43E-02 | 1.00E+00 | 1.00E+00 | 4.37E-02 | 1.00E+00 | 4.76E-02 | 4.96E-02 |
| 246.09053 | 152.66 | 14.41 | 14.47 | 13.79 | 14.10 | 3.55E-01 | 9.99E-01 | 4.34E-01 | 8.91E-01 | 3.75E-01 | 8.36E-01 | 8.87E-01 |
| 246.097   | 284.72 | 20.29 | 19.18 | 18.68 | 19.68 | 6.13E-05 | 9.02E-03 | 2.92E-05 | 3.22E-01 | 4.87E-01 | 5.32E-01 | 3.26E-02 |
| 246.10663 | 206.15 | 16.36 | 8.49  | 8.34  | 10.78 | 3.78E-58 | 3.65E-14 | 3.65E-14 | 3.65E-14 | 9.84E-01 | 8.42E-07 | 1.11E-07 |
| 246.10849 | 60.8   | 15.22 | 15.00 | 15.06 | 14.44 | 7.02E-04 | 6.33E-01 | 8.02E-01 | 3.38E-04 | 9.92E-01 | 2.47E-02 | 9.90E-03 |
| 246.13353 | 193.81 | 17.54 | 15.13 | 15.21 | 15.22 | 6.09E-32 | 3.83E-14 | 4.03E-14 | 4.85E-14 | 9.81E-01 | 9.71E-01 | 1.00E+00 |
| 246.14471 | 55.23  | 17.01 | 15.80 | 15.83 | 16.20 | 2.11E-11 | 7.58E-10 | 1.38E-09 | 1.05E-04 | 9.98E-01 | 1.48E-01 | 1.97E-01 |
| 246.15428 | 45.95  | 19.38 | 20.41 | 19.96 | 20.15 | 6.48E-06 | 3.20E-06 | 1.91E-02 | 1.14E-03 | 1.26E-01 | 6.21E-01 | 7.90E-01 |
| 246.16976 | 30.86  | 24.34 | 24.35 | 24.83 | 24.52 | 2.61E-02 | 1.00E+00 | 3.05E-02 | 7.67E-01 | 4.53E-02 | 8.12E-01 | 3.43E-01 |
| 246.18118 | 63.99  | 19.95 | 21.87 | 21.73 | 21.13 | 3.90E-32 | 3.65E-14 | 3.74E-14 | 1.12E-12 | 7.98E-01 | 2.00E-05 | 6.87E-04 |
| 246.22939 | 23.66  | 17.08 | 13.91 | 14.32 | 15.22 | 4.09E-37 | 3.65E-14 | 3.65E-14 | 8.92E-14 | 2.27E-01 | 1.29E-07 | 5.02E-04 |
| 246.22967 | 170.99 | 17.39 | 15.00 | 15.34 | 15.74 | 1.50E-36 | 3.65E-14 | 3.67E-14 | 7.24E-14 | 1.85E-01 | 1.72E-04 | 9.35E-02 |
| 246.24247 | 23.03  | 14.94 | 13.45 | 13.44 | 14.53 | 5.52E-06 | 1.15E-04 | 8.63E-05 | 6.42E-01 | 1.00E+00 | 1.68E-02 | 1.44E-02 |
| 246.6234  | 27.31  | 17.02 | 21.10 | 20.45 | 20.36 | 1.38E-45 | 3.65E-14 | 3.65E-14 | 3.65E-14 | 3.78E-02 | 1.87E-02 | 9.86E-01 |
| 246.78393 | 47.77  | 20.16 | 20.39 | 20.52 | 19.92 | 2.88E-05 | 2.47E-01 | 1.71E-02 | 2.13E-01 | 7.17E-01 | 1.89E-03 | 2.65E-05 |
| 246.91712 | 113.8  | 12.17 | 16.64 | 12.44 | 16.21 | 8.25E-23 | 7.45E-14 | 9.44E-01 | 2.79E-13 | 9.85E-14 | 8.37E-01 | 1.62E-11 |
| 246.96902 | 85.87  | 14.32 | 17.84 | 18.04 | 16.60 | 5.17E-43 | 3.65E-14 | 3.65E-14 | 7.47E-14 | 8.31E-01 | 5.62E-06 | 7.42E-08 |
| 246.99602 | 30.45  | 8.27  | 8.53  | 16.40 | 15.94 | 3.83E-31 | 9.85E-01 | 5.83E-14 | 7.42E-14 | 7.22E-14 | 7.47E-14 | 9.34E-01 |
| 247.0068  | 87.4   | 15.66 | 16.66 | 16.79 | 15.81 | 1.42E-10 | 1.28E-06 | 2.69E-08 | 8.70E-01 | 9.05E-01 | 1.41E-04 | 6.50E-06 |
| 247.0141  | 305.75 | 14.14 | 20.04 | 18.60 | 17.11 | 9.43E-72 | 3.65E-14 | 3.65E-14 | 3.65E-14 | 4.16E-09 | 3.67E-14 | 3.89E-09 |
| 247.02851 | 55.26  | 20.80 | 19.14 | 20.22 | 18.41 | 2.04E-19 | 2.55E-10 | 7.45E-02 | 7.36E-14 | 8.80E-05 | 2.25E-02 | 4.89E-11 |
| 247.03397 | 90.89  | 17.38 | 18.69 | 18.72 | 18.70 | 2.01E-12 | 2.50E-09 | 7.27E-10 | 5.31E-09 | 9.99E-01 | 1.00E+00 | 9.99E-01 |
| 247.05769 | 233.43 | 18.63 | 20.31 | 17.52 | 19.33 | 2.82E-05 | 1.39E-02 | 1.83E-01 | 6.13E-01 | 9.80E-06 | 3.33E-01 | 1.16E-02 |
| 247.06412 | 86.02  | 13.09 | 16.81 | 16.49 | 16.23 | 5.35E-16 | 1.72E-13 | 5.00E-12 | 6.19E-10 | 9.01E-01 | 6.28E-01 | 9.50E-01 |
| 247.09272 | 65.72  | 16.34 | 15.57 | 16.23 | 16.24 | 8.13E-03 | 8.68E-03 | 9.73E-01 | 9.81E-01 | 3.69E-02 | 4.27E-02 | 1.00E+00 |
| 247.10063 | 163.56 | 18.00 | 15.02 | 15.14 | 15.76 | 2.05E-39 | 3.65E-14 | 3.65E-14 | 6.38E-14 | 9.46E-01 | 3.31E-03 | 1.70E-02 |
| 247.11892 | 26.5   | 14.68 | 14.87 | 15.09 | 9.96  | 4.14E-12 | 9.93E-01 | 9.36E-01 | 2.20E-09 | 9.91E-01 | 1.59E-09 | 2.15E-10 |
| 247.11898 | 209.27 | 15.73 | 10.45 | 10.57 | 10.23 | 1.58E-21 | 7.56E-14 | 7.45E-14 | 7.55E-14 | 9.97E-01 | 9.83E-01 | 9.44E-01 |
| 247.12763 | 45.61  | 18.30 | 19.72 | 19.63 | 19.72 | 3.50E-36 | 3.65E-14 | 3.70E-14 | 3.65E-14 | 8.31E-01 | 1.00E+00 | 8.60E-01 |
| 247.13245 | 197.61 | 16.76 | 12.83 | 13.08 | 14.27 | 5.28E-34 | 3.65E-14 | 3.67E-14 | 1.13E-13 | 8.42E-01 | 2.74E-05 | 6.52E-04 |
| 247.13999 | 65.87  | 16.11 | 15.09 | 15.82 | 15.28 | 7.23E-02 | 8.06E-02 | 8.99E-01 | 2.25E-01 | 3.42E-01 | 9.77E-01 | 6.17E-01 |
| 247.15541 | 26.95  | 20.20 | 20.67 | 19.98 | 19.99 | 9.78E-03 | 1.42E-01 | 7.48E-01 | 7.96E-01 | 1.31E-02 | 2.04E-02 | 1.00E+00 |
| 247.1651  | 52.91  | 18.53 | 17.69 | 16.95 | 17.90 | 2.55E-06 | 1.94E-02 | 4.40E-07 | 1.47E-01 | 5.88E-02 | 8.95E-01 | 9.24E-03 |
| 247.16927 | 165.41 | 17.81 | 15.80 | 15.90 | 16.40 | 7.64E-24 | 6.96E-14 | 7.19E-14 | 4.16E-11 | 9.50E-01 | 1.59E-02 | 6.24E-02 |
| 247.18459 | 59.07  | 16.25 | 18.41 | 18.21 | 17.63 | 5.63E-25 | 5.36E-14 | 7.36E-14 | 2.54E-10 | 7.25E-01 | 9.06E-04 | 2.39E-02 |
| 247.20182 | 48.39  | 17.11 | 13.34 | 15.26 | 15.60 | 6.23E-14 | 7.74E-14 | 1.26E-04 | 4.18E-03 | 1.29E-04 | 9.00E-06 | 8.74E-01 |
| 247.20558 | 209.98 | 16.43 | 10.31 | 11.06 | 13.01 | 3.82E-30 | 3.67E-14 | 4.92E-14 | 1.90E-10 | 4.19E-01 | 1.38E-06 | 7.68E-04 |
| 247.2417  | 23.86  | 18.70 | 16.98 | 16.81 | 17.75 | 6.36E-31 | 4.39E-14 | 3.65E-14 | 1.09E-08 | 6.54E-01 | 1.21E-05 | 3.66E-08 |
| 247.24203 | 170.05 | 18.95 | 18.05 | 18.13 | 18.50 | 4.16E-05 | 9.03E-05 | 4.19E-04 | 1.45E-01 | 9.78E-01 | 1.54E-01 | 3.11E-01 |
| 247.47592 | 100.57 | 16.20 | 15.00 | 15.54 | 15.73 | 1.42E-02 | 6.26E-03 | 2.55E-01 | 5.93E-01 | 4.81E-01 | 2.33E-01 | 9.55E-01 |
| 247.51569 | 306.52 | 14.40 | 16.23 | 14.78 | 13.83 | 1.34E-25 | 7.32E-14 | 1.81E-01 | 1.95E-02 | 8.47E-12 | 3.87E-14 | 1.92E-05 |
| 247.54699 | 80.85  | 18.65 | 16.59 | 16.24 | 16.25 | 8.67E-17 | 1.46E-10 | 1.40E-13 | 5.32E-13 | 6.55E-01 | 6.93E-01 | 1.00E+00 |
| 247.55798 | 251.58 | 12.49 | 15.64 | 16.39 | 15.58 | 4.81E-29 | 7.35E-14 | 3.67E-14 | 7.41E-14 | 8.32E-02 | 9.98E-01 | 6.17E-02 |
| 247.91226 | 266.37 | 16.88 | 7.19  | 7.02  | 9.52  | 3.00E-33 | 3.67E-14 | 3.65E-14 | 7.45E-14 | 9.96E-01 | 2.17E-02 | 1.06E-02 |
| 247.92863 | 54.56  | 17.02 | 8.78  | 9.56  | 11.05 | 1.89E-64 | 3.65E-14 | 3.65E-14 | 3.65E-14 | 1.57E-01 | 7.01E-08 | 6.47E-04 |
| 247.95225 | 60.71  | 15.32 | 15.87 | 15.22 | 15.31 | 4.68E-01 | 5.96E-01 | 9.95E-01 | 1.00E+00 | 4.66E-01 | 6.16E-01 | 9.98E-01 |
| 247.96578 | 87.39  | 15.63 | 18.25 | 18.57 | 17.42 | 4.60E-26 | 7.23E-14 | 4.32E-14 | 3.64E-10 | 6.03E-01 | 1.33E-02 | 1.56E-04 |
| 247.97425 | 252.68 | 16.91 | 16.45 | 16.93 | 15.89 | 5.83E-04 | 3.22E-01 | 1.00E+00 | 1.41E-03 | 2.88E-01 | 1.93E-01 | 1.31E-03 |
| 248.0318  | 241.09 | 14.76 | 17.41 | 17.31 | 16.87 | 1.66E-12 | 1.19E-10 | 4.00E-10 | 6.64E-07 | 9.93E-01 | 5.26E-01 | 6.83E-01 |
| 248.05205 | 78.62  | 17.50 | 11.79 | 11.31 | 14.12 | 1.45E-36 | 3.65E-14 | 3.65E-14 | 4.17E-12 | 6.97E-01 | 4.36E-06 | 1.61E-08 |
| 248.06102 | 151.13 | 16.81 | 18.49 | 18.46 | 18.43 | 8.76E-14 | 8.15E-11 | 1.20E-10 | 9.34E-10 | 9.99E-01 | 9.96E-01 | 1.00E+00 |
| 248.07128 | 83.62  | 16.97 | 20.27 | 19.99 | 19.90 | 1.23E-40 | 3.65E-14 | 3.65E-14 | 3.65E-14 | 5.88E-01 | 3.86E-01 | 9.82E-01 |
| 248.08774 | 103.66 | 16.20 | 16.81 | 16.64 | 16.63 | 3.40E-04 | 2.21E-04 | 1.18E-02 | 2.07E-02 | 6.83E-01 | 6.58E-01 | 1.00E+00 |
| 248.09545 | 24.85  | 12.37 | 13.41 | 10.91 | 16.01 | 6.62E-14 | 2.64E-01 | 5.10E-02 | 1.53E-08 | 1.64E-04 | 1.51E-04 | 9.27E-14 |
| 248.11271 | 281.13 | 19.43 | 16.51 | 16.21 | 16.72 | 1.32E-30 | 5.16E-14 | 3.70E-14 | 7.46E-14 | 6.65E-01 | 8.78E-01 | 2.46E-01 |
| 248.12244 | 279.63 | 18.67 | 16.27 | 16.22 | 16.27 | 1.43E-28 | 6.03E-14 | 5.12E-14 | 6.78E-14 | 9.95E-01 | 1.00E+00 | 9.95E-01 |
| 248.14909 | 57.2   | 24.56 | 26.22 | 25.08 | 24.55 | 2.89E-21 | 7.46E-14 | 1.04E-02 | 1.00E+00 | 7.04E-10 | 7.41E-14 | 1.35E-02 |
| 248.16012 | 60.38  | 17.53 | 16.16 | 16.28 | 16.54 | 1.37E-06 | 4.72E-06 | 2.85E-05 | 2.36E-03 | 9.74E-01 | 5.46E-01 | 7.93E-01 |
| 248.16449 | 211.4  | 16.11 | 10.27 | 11.87 | 13.07 | 1.26E-31 | 3.65E-14 | 7.32E-14 | 8.76E-11 | 1.19E-03 | 6.58E-09 | 3.31E-02 |
| 248.17511 | 25.79  | 16.60 | 14.05 | 16.13 | 15.17 | 3.23E-08 | 3.31E-08 | 6.62E-01 | 6.02E-03 | 1.59E-05 | 5.86E-02 | 1.40E-01 |
| 248.24507 | 23.61  | 16.53 | 12.03 | 12.78 | 14.63 | 8.65E-31 | 3.65E-14 | 5.81E-14 | 1.16E-06 | 1.45E-01 | 7.69E-11 | 3.91E-06 |
| 248.24529 | 209.89 | 17.19 | 14.38 | 14.66 | 15.21 | 7.67E-30 | 3.70E-14 | 4.79E-14 | 8.20E-14 | 6.12E-01 | 2.92E-03 | 8.87E-02 |
| 248.57266 | 83.3   | 14.94 | 17.45 | 16.96 | 17.37 | 3.11E-27 | 4.85E-14 | 7.49E-14 | 6.49E-14 | 1.41E-01 | 9.89E-01 | 2.88E-01 |
| 248.78125 | 46.17  | 18.97 | 18.93 | 19.10 | 18.61 | 1.68E-05 | 9.85E-01 | 4.75E-01 | 1.22E-03 | 3.05E-01 | 5.91E-03 | 5.78E-06 |

|           |        |       |       |       |       |          |          |          |          |          |          |          |
|-----------|--------|-------|-------|-------|-------|----------|----------|----------|----------|----------|----------|----------|
| 248.87041 | 47.23  | 20.63 | 22.20 | 22.30 | 22.02 | 1.76E-55 | 3.65E-14 | 3.65E-14 | 3.65E-14 | 7.00E-01 | 1.88E-01 | 1.23E-02 |
| 248.89875 | 25.73  | 20.85 | 21.88 | 21.80 | 21.79 | 1.59E-31 | 3.72E-14 | 4.45E-14 | 5.70E-14 | 8.09E-01 | 7.84E-01 | 1.00E+00 |
| 248.95829 | 253.41 | 15.96 | 17.78 | 17.69 | 16.97 | 9.18E-06 | 3.29E-05 | 7.52E-05 | 5.89E-02 | 9.96E-01 | 2.11E-01 | 3.04E-01 |
| 248.97605 | 49.78  | 14.80 | 15.76 | 15.78 | 15.24 | 2.12E-01 | 2.81E-01 | 2.54E-01 | 8.59E-01 | 1.00E+00 | 7.91E-01 | 7.66E-01 |
| 248.99056 | 36.78  | 11.51 | 8.44  | 15.04 | 10.53 | 2.69E-33 | 1.14E-10 | 1.80E-13 | 1.24E-01 | 3.65E-14 | 5.31E-05 | 7.36E-14 |
| 249.03148 | 73.8   | 18.53 | 17.01 | 17.77 | 17.50 | 8.13E-15 | 7.47E-14 | 7.94E-05 | 1.09E-07 | 1.25E-04 | 3.71E-02 | 4.32E-01 |
| 249.0455  | 84.09  | 18.84 | 21.00 | 21.35 | 21.12 | 4.25E-38 | 3.72E-14 | 3.65E-14 | 3.67E-14 | 2.05E-01 | 9.19E-01 | 5.82E-01 |
| 249.05388 | 218.14 | 11.37 | 10.58 | 13.49 | 15.18 | 6.37E-07 | 7.75E-01 | 4.89E-02 | 6.44E-05 | 3.79E-03 | 1.98E-06 | 2.11E-01 |
| 249.06285 | 121.59 | 13.64 | 16.78 | 15.07 | 14.66 | 4.83E-07 | 8.53E-08 | 3.53E-02 | 2.46E-01 | 1.09E-02 | 1.26E-03 | 8.80E-01 |
| 249.07176 | 87.92  | 17.93 | 19.89 | 19.83 | 19.39 | 4.44E-27 | 4.85E-14 | 5.52E-14 | 1.58E-13 | 9.87E-01 | 3.43E-02 | 7.50E-02 |
| 249.10807 | 73.75  | 18.08 | 19.00 | 19.39 | 19.29 | 8.96E-15 | 2.69E-07 | 2.54E-13 | 5.04E-11 | 9.32E-02 | 3.56E-01 | 9.25E-01 |
| 249.14614 | 148.99 | 14.78 | 13.51 | 14.51 | 14.47 | 5.84E-05 | 3.34E-05 | 7.52E-01 | 6.88E-01 | 2.38E-03 | 5.68E-03 | 9.99E-01 |
| 249.14832 | 277    | 17.53 | 15.56 | 15.68 | 16.02 | 3.96E-19 | 7.45E-14 | 7.72E-14 | 3.36E-10 | 9.51E-01 | 1.84E-01 | 4.30E-01 |
| 249.15399 | 57.39  | 22.03 | 23.31 | 22.41 | 22.21 | 4.85E-18 | 7.45E-14 | 2.19E-02 | 5.57E-01 | 1.99E-09 | 1.53E-12 | 4.72E-01 |
| 249.18391 | 23.87  | 17.84 | 18.40 | 15.53 | 16.07 | 1.59E-47 | 4.99E-03 | 3.65E-14 | 7.12E-14 | 3.65E-14 | 3.65E-14 | 1.19E-02 |
| 249.18466 | 297.2  | 17.90 | 16.94 | 17.21 | 17.05 | 2.20E-04 | 3.22E-04 | 1.72E-02 | 2.52E-03 | 6.65E-01 | 9.74E-01 | 9.05E-01 |
| 249.22136 | 174.87 | 17.39 | 14.88 | 14.97 | 15.48 | 7.16E-35 | 3.65E-14 | 3.65E-14 | 7.45E-14 | 9.66E-01 | 1.33E-02 | 4.51E-02 |
| 249.25745 | 23.6   | 16.58 | 11.44 | 12.30 | 12.31 | 5.51E-42 | 3.65E-14 | 3.65E-14 | 3.65E-14 | 4.66E-02 | 5.32E-02 | 1.00E+00 |
| 249.25754 | 274.74 | 18.11 | 15.04 | 14.98 | 15.15 | 4.27E-24 | 7.49E-14 | 7.34E-14 | 7.45E-14 | 9.98E-01 | 9.86E-01 | 9.53E-01 |
| 249.39491 | 97.61  | 10.56 | 16.65 | 16.34 | 15.44 | 3.20E-54 | 3.65E-14 | 3.65E-14 | 3.65E-14 | 7.75E-01 | 2.38E-03 | 3.97E-02 |
| 249.50335 | 306.4  | 14.83 | 17.01 | 13.94 | 14.31 | 4.69E-27 | 7.56E-14 | 2.02E-03 | 1.72E-01 | 3.83E-14 | 7.22E-14 | 4.92E-01 |
| 249.50512 | 86.25  | 11.96 | 17.95 | 18.87 | 16.74 | 8.87E-26 | 7.56E-14 | 4.32E-14 | 1.68E-12 | 4.33E-01 | 2.32E-01 | 4.61E-03 |
| 249.87384 | 47.48  | 15.69 | 15.24 | 15.37 | 15.67 | 4.04E-03 | 9.16E-03 | 1.21E-01 | 9.99E-01 | 7.75E-01 | 2.30E-02 | 2.05E-01 |
| 249.90068 | 34.33  | 15.93 | 16.21 | 16.04 | 16.62 | 7.87E-04 | 3.57E-01 | 9.09E-01 | 4.74E-04 | 7.75E-01 | 9.24E-02 | 6.33E-03 |
| 249.97868 | 255.98 | 18.39 | 17.67 | 17.69 | 18.39 | 1.57E-05 | 1.04E-03 | 1.43E-03 | 1.00E+00 | 9.99E-01 | 1.96E-03 | 2.63E-03 |
| 249.97885 | 127.43 | 17.83 | 17.77 | 18.53 | 18.34 | 2.21E-02 | 9.97E-01 | 6.53E-02 | 2.95E-01 | 4.89E-02 | 2.33E-01 | 9.25E-01 |
| 250.00556 | 88.66  | 14.86 | 15.96 | 16.45 | 15.75 | 3.92E-05 | 5.53E-03 | 1.36E-05 | 4.66E-02 | 4.75E-01 | 9.28E-01 | 1.83E-01 |
| 250.04712 | 86.61  | 16.28 | 16.61 | 17.19 | 17.28 | 1.81E-10 | 1.54E-01 | 7.36E-08 | 1.08E-08 | 1.73E-03 | 3.42E-04 | 9.46E-01 |
| 250.07437 | 65.24  | 15.84 | 16.80 | 17.01 | 16.60 | 4.73E-04 | 5.99E-03 | 3.90E-04 | 5.74E-02 | 8.97E-01 | 9.09E-01 | 5.29E-01 |
| 250.08558 | 62.51  | 16.66 | 15.02 | 14.47 | 13.99 | 3.50E-07 | 3.49E-03 | 2.92E-05 | 5.85E-07 | 6.64E-01 | 1.67E-01 | 7.66E-01 |
| 250.09329 | 293.54 | 16.32 | 16.87 | 16.98 | 15.96 | 2.36E-06 | 3.45E-02 | 5.38E-03 | 2.81E-01 | 9.42E-01 | 1.43E-04 | 1.09E-05 |
| 250.09358 | 93.16  | 18.94 | 20.81 | 20.90 | 20.46 | 5.26E-33 | 3.72E-14 | 3.65E-14 | 7.52E-14 | 9.33E-01 | 1.28E-01 | 2.87E-02 |
| 250.10159 | 274.26 | 18.42 | 15.78 | 16.10 | 16.35 | 1.28E-31 | 3.65E-14 | 4.56E-14 | 7.32E-14 | 3.96E-01 | 4.26E-02 | 6.67E-01 |
| 250.11124 | 39.93  | 13.69 | 16.21 | 14.74 | 17.32 | 4.31E-15 | 3.50E-08 | 5.68E-02 | 9.36E-14 | 3.60E-03 | 5.96E-02 | 7.42E-08 |
| 250.13801 | 208.34 | 15.74 | 10.98 | 11.77 | 11.09 | 5.51E-12 | 4.26E-10 | 1.64E-07 | 2.90E-09 | 6.80E-01 | 9.99E-01 | 7.89E-01 |
| 250.1439  | 197.79 | 16.14 | 11.09 | 12.85 | 12.44 | 1.09E-20 | 7.07E-14 | 2.05E-10 | 5.73E-12 | 2.25E-03 | 4.16E-02 | 8.43E-01 |
| 250.15326 | 39.21  | 17.29 | 17.65 | 17.06 | 16.67 | 1.49E-03 | 4.10E-01 | 7.68E-01 | 5.53E-02 | 7.12E-02 | 6.44E-04 | 3.93E-01 |
| 250.18007 | 212.71 | 16.10 | 10.33 | 11.43 | 12.35 | 1.48E-20 | 7.31E-14 | 1.08E-13 | 2.82E-09 | 2.25E-01 | 4.57E-03 | 4.08E-01 |
| 250.48628 | 104.87 | 15.04 | 15.08 | 13.95 | 14.92 | 3.07E-04 | 9.99E-01 | 9.97E-04 | 9.78E-01 | 1.03E-03 | 9.58E-01 | 8.24E-03 |
| 250.49805 | 267.73 | 15.94 | 19.65 | 19.60 | 17.85 | 4.77E-27 | 5.12E-14 | 5.32E-14 | 3.17E-07 | 9.99E-01 | 3.05E-06 | 5.01E-06 |
| 250.50403 | 86.89  | 13.02 | 15.36 | 16.54 | 15.38 | 8.30E-15 | 1.43E-07 | 7.75E-14 | 2.55E-07 | 2.42E-02 | 1.00E+00 | 3.26E-02 |
| 250.77867 | 46.57  | 16.55 | 15.80 | 15.75 | 15.62 | 9.88E-13 | 4.59E-08 | 3.50E-09 | 3.53E-11 | 9.78E-01 | 5.13E-01 | 7.50E-01 |
| 250.86769 | 47.2   | 19.38 | 20.88 | 20.98 | 20.69 | 2.07E-56 | 3.65E-14 | 3.65E-14 | 3.65E-14 | 6.31E-01 | 1.04E-01 | 3.43E-03 |
| 250.88028 | 111.54 | 17.33 | 17.06 | 17.12 | 17.90 | 2.35E-01 | 9.17E-01 | 9.57E-01 | 5.50E-01 | 9.99E-01 | 2.35E-01 | 2.89E-01 |
| 250.89465 | 41.15  | 17.44 | 19.52 | 19.42 | 19.31 | 1.17E-54 | 3.65E-14 | 3.65E-14 | 3.65E-14 | 8.05E-01 | 3.00E-01 | 8.11E-01 |
| 250.91329 | 42.59  | 18.85 | 20.20 | 20.28 | 20.75 | 4.91E-18 | 3.13E-10 | 1.92E-11 | 7.43E-14 | 9.79E-01 | 4.48E-02 | 1.09E-01 |
| 250.91994 | 41.11  | 15.80 | 15.80 | 15.80 | 16.02 | 8.18E-01 | 1.00E+00 | 1.00E+00 | 8.37E-01 | 1.00E+00 | 8.55E-01 | 8.56E-01 |
| 250.93728 | 20.22  | 16.83 | 16.13 | 16.46 | 16.78 | 1.95E-02 | 2.07E-02 | 4.06E-01 | 9.96E-01 | 5.41E-01 | 5.80E-02 | 5.96E-01 |
| 250.95526 | 49.54  | 18.65 | 18.52 | 19.40 | 18.96 | 2.64E-07 | 8.40E-01 | 1.19E-05 | 2.05E-01 | 5.30E-07 | 3.84E-02 | 3.87E-02 |
| 250.96267 | 265.47 | 18.45 | 19.85 | 20.18 | 19.33 | 4.10E-07 | 6.89E-05 | 3.73E-07 | 3.14E-02 | 7.26E-01 | 4.05E-01 | 5.04E-02 |
| 250.98307 | 41.68  | 12.68 | 15.72 | 15.62 | 15.61 | 1.09E-26 | 6.43E-14 | 6.94E-14 | 7.41E-14 | 9.86E-01 | 9.82E-01 | 1.00E+00 |
| 250.99127 | 158.51 | 14.36 | 13.64 | 12.96 | 12.69 | 6.89E-07 | 9.34E-02 | 4.51E-05 | 1.80E-06 | 1.40E-01 | 2.02E-02 | 8.35E-01 |
| 250.9994  | 238.14 | 17.21 | 16.24 | 15.58 | 16.00 | 5.64E-11 | 1.36E-04 | 2.42E-11 | 2.08E-06 | 2.26E-02 | 7.44E-01 | 2.81E-01 |
| 251.03664 | 69.14  | 22.41 | 22.78 | 22.82 | 23.05 | 2.29E-02 | 2.58E-01 | 1.70E-01 | 1.30E-02 | 9.97E-01 | 6.06E-01 | 7.19E-01 |
| 251.04401 | 77.72  | 16.63 | 17.59 | 17.99 | 18.09 | 8.88E-17 | 2.14E-07 | 2.10E-13 | 9.21E-14 | 9.35E-02 | 2.40E-02 | 9.31E-01 |
| 251.06958 | 70.07  | 19.43 | 20.07 | 20.22 | 19.95 | 1.21E-02 | 5.92E-02 | 9.24E-03 | 1.92E-01 | 9.30E-01 | 9.70E-01 | 7.25E-01 |
| 251.09733 | 67.63  | 17.44 | 16.85 | 16.53 | 16.66 | 1.60E-03 | 7.93E-02 | 1.48E-03 | 1.27E-02 | 6.00E-01 | 8.93E-01 | 9.59E-01 |
| 251.11398 | 213.42 | 16.37 | 14.02 | 13.12 | 13.44 | 4.64E-10 | 2.82E-05 | 2.44E-09 | 2.18E-07 | 3.00E-01 | 6.88E-01 | 9.33E-01 |
| 251.12775 | 203.75 | 16.44 | 13.16 | 14.14 | 13.96 | 8.25E-23 | 5.61E-14 | 1.01E-12 | 2.14E-13 | 7.57E-03 | 5.26E-02 | 9.42E-01 |
| 251.13299 | 29.05  | 19.03 | 16.33 | 18.98 | 17.62 | 9.91E-18 | 7.65E-14 | 9.98E-01 | 6.62E-05 | 9.95E-14 | 5.49E-04 | 1.93E-04 |
| 251.16405 | 174.45 | 17.56 | 15.53 | 15.43 | 15.92 | 8.41E-23 | 7.24E-14 | 7.09E-14 | 3.28E-12 | 9.62E-01 | 3.04E-01 | 1.18E-01 |
| 251.18527 | 173.97 | 16.87 | 15.55 | 15.57 | 16.08 | 1.63E-13 | 1.51E-11 | 2.20E-11 | 1.30E-04 | 9.99E-01 | 2.78E-02 | 3.70E-02 |
| 251.20026 | 23.13  | 18.72 | 17.74 | 17.48 | 17.96 | 6.35E-12 | 7.00E-08 | 6.90E-12 | 7.82E-05 | 4.31E-01 | 5.77E-01 | 3.10E-02 |
| 251.20028 | 286.6  | 20.28 | 20.04 | 19.78 | 20.19 | 5.03E-01 | 8.95E-01 | 4.59E-01 | 9.95E-01 | 8.85E-01 | 9.73E-01 | 6.60E-01 |
| 251.23675 | 280.54 | 17.94 | 16.08 | 15.96 | 16.38 | 4.25E-16 | 1.82E-12 | 1.19E-13 | 7.29E-09 | 9.60E-01 | 6.37E-01 | 3.38E-01 |
| 251.49398 | 98.09  | 15.40 | 14.84 | 14.29 | 14.31 | 5.98E-06 | 9.46E-02 | 2.48E-05 | 7.46E-05 | 1.03E-01 | 1.47E-01 | 1.00E+00 |
| 251.506   | 143.58 | 13.82 | 16.76 | 15.49 | 14.33 | 3.29E-12 | 5.98E-12 | 1.30E-04 | 5.73E-01 | 8.48E-03 | 7.87E-08 | 2.58E-02 |
| 251.5176  | 295.25 | 15.03 | 17.83 | 17.82 | 16.17 | 3.92E-34 | 3.65E-14 | 3.65E-14 | 4.32E-06 | 1.00E+00 | 4.76E-11 | 4.15E-11 |

|           |        |       |       |       |       |          |          |          |          |          |          |          |
|-----------|--------|-------|-------|-------|-------|----------|----------|----------|----------|----------|----------|----------|
| 251.57769 | 88.14  | 16.30 | 17.92 | 17.79 | 17.07 | 5.60E-16 | 1.22E-13 | 1.74E-12 | 7.72E-04 | 9.23E-01 | 3.14E-04 | 2.73E-03 |
| 251.6337  | 27.58  | 15.85 | 18.30 | 17.38 | 18.15 | 2.17E-43 | 3.65E-14 | 7.28E-14 | 3.65E-14 | 5.67E-08 | 8.07E-01 | 1.01E-05 |
| 251.88125 | 116.76 | 17.01 | 10.63 | 13.55 | 11.95 | 5.29E-28 | 3.67E-14 | 2.27E-10 | 7.38E-14 | 2.53E-07 | 6.59E-02 | 1.40E-02 |
| 251.91654 | 41.52  | 14.92 | 13.92 | 14.72 | 15.14 | 5.85E-03 | 2.11E-02 | 9.29E-01 | 9.24E-01 | 1.15E-01 | 5.31E-03 | 6.37E-01 |
| 251.9572  | 44.32  | 16.01 | 14.07 | 14.23 | 14.70 | 2.97E-07 | 1.15E-06 | 7.66E-06 | 2.63E-03 | 9.73E-01 | 3.61E-01 | 6.11E-01 |
| 251.96717 | 35.92  | 13.38 | 17.93 | 17.81 | 17.39 | 4.13E-54 | 3.65E-14 | 3.65E-14 | 3.65E-14 | 9.66E-01 | 1.69E-01 | 3.70E-01 |
| 251.98096 | 58.33  | 15.28 | 13.98 | 14.38 | 14.63 | 1.49E-02 | 8.37E-03 | 1.11E-01 | 4.01E-01 | 7.80E-01 | 4.33E-01 | 9.32E-01 |
| 251.98828 | 33.45  | 15.06 | 11.79 | 17.25 | 14.78 | 6.15E-36 | 7.55E-14 | 1.53E-09 | 8.54E-01 | 3.65E-14 | 9.94E-14 | 1.47E-10 |
| 251.99455 | 120.96 | 21.15 | 18.02 | 18.52 | 18.06 | 7.61E-34 | 3.65E-14 | 5.72E-14 | 3.70E-14 | 1.80E-01 | 9.99E-01 | 2.50E-01 |
| 251.99512 | 209.12 | 17.28 | 15.38 | 15.15 | 16.18 | 1.11E-17 | 3.86E-13 | 7.54E-14 | 5.59E-05 | 7.72E-01 | 8.37E-03 | 2.55E-04 |
| 252.00663 | 28.95  | 14.15 | 16.09 | 16.99 | 17.00 | 2.82E-11 | 5.10E-05 | 8.62E-10 | 2.92E-09 | 1.69E-01 | 1.87E-01 | 1.00E+00 |
| 252.016   | 264.26 | 16.82 | 19.29 | 20.09 | 18.34 | 3.87E-46 | 3.65E-14 | 3.65E-14 | 1.54E-13 | 1.40E-04 | 7.12E-06 | 7.58E-14 |
| 252.02885 | 84.98  | 15.69 | 17.10 | 17.51 | 17.26 | 5.04E-14 | 3.00E-08 | 6.03E-13 | 1.49E-09 | 2.97E-01 | 9.04E-01 | 7.34E-01 |
| 252.04057 | 75.86  | 17.90 | 19.19 | 18.92 | 19.18 | 7.26E-14 | 1.09E-11 | 5.38E-08 | 5.11E-11 | 4.30E-01 | 1.00E+00 | 4.92E-01 |
| 252.04866 | 88.97  | 16.36 | 19.08 | 18.47 | 18.25 | 2.71E-21 | 6.87E-14 | 1.52E-13 | 6.36E-11 | 9.60E-02 | 1.46E-02 | 8.60E-01 |
| 252.07256 | 300.9  | 13.56 | 16.65 | 16.69 | 15.35 | 7.00E-23 | 7.47E-14 | 7.39E-14 | 2.73E-07 | 1.00E+00 | 5.24E-04 | 3.05E-04 |
| 252.07276 | 157.17 | 14.76 | 16.91 | 15.95 | 16.01 | 2.91E-09 | 3.56E-10 | 9.41E-04 | 7.59E-04 | 1.52E-02 | 3.43E-02 | 9.98E-01 |
| 252.07302 | 66.32  | 19.08 | 19.87 | 19.99 | 19.41 | 3.52E-04 | 4.26E-03 | 6.15E-04 | 5.08E-01 | 9.62E-01 | 2.42E-01 | 8.69E-02 |
| 252.07762 | 57.64  | 21.33 | 21.96 | 22.41 | 21.43 | 8.82E-13 | 1.41E-04 | 1.02E-11 | 9.19E-01 | 1.46E-02 | 3.66E-03 | 4.48E-09 |
| 252.108   | 94.64  | 18.86 | 19.42 | 19.59 | 19.09 | 4.21E-13 | 7.86E-08 | 2.31E-12 | 1.05E-01 | 3.20E-01 | 4.98E-03 | 5.20E-06 |
| 252.11711 | 287.19 | 19.11 | 16.99 | 16.97 | 16.83 | 1.63E-21 | 7.61E-14 | 7.45E-14 | 7.56E-14 | 1.00E+00 | 9.25E-01 | 9.47E-01 |
| 252.12297 | 223.74 | 16.61 | 11.86 | 12.74 | 12.58 | 1.58E-15 | 1.22E-13 | 3.89E-10 | 3.36E-10 | 4.33E-01 | 6.25E-01 | 9.94E-01 |
| 252.13551 | 27.95  | 16.93 | 15.63 | 15.96 | 17.40 | 3.06E-06 | 1.30E-03 | 2.78E-02 | 5.51E-01 | 7.81E-01 | 1.60E-05 | 6.35E-04 |
| 252.14404 | 294.73 | 16.63 | 17.05 | 17.28 | 16.51 | 1.45E-05 | 5.03E-02 | 4.64E-04 | 8.98E-01 | 5.25E-01 | 1.10E-02 | 7.21E-05 |
| 252.15359 | 282.3  | 16.78 | 16.70 | 16.53 | 15.82 | 5.50E-04 | 9.87E-01 | 6.94E-01 | 5.22E-04 | 8.84E-01 | 2.64E-03 | 2.34E-02 |
| 252.15925 | 22.26  | 16.39 | 12.40 | 13.81 | 12.99 | 1.81E-17 | 7.41E-14 | 4.36E-08 | 3.90E-12 | 8.90E-03 | 5.62E-01 | 2.79E-01 |
| 252.15931 | 201.02 | 16.44 | 11.56 | 12.67 | 12.27 | 7.95E-20 | 7.58E-14 | 4.64E-12 | 2.69E-13 | 1.38E-01 | 5.39E-01 | 8.74E-01 |
| 252.16306 | 76.18  | 15.94 | 17.13 | 17.17 | 16.91 | 7.27E-15 | 6.15E-12 | 1.10E-12 | 4.47E-08 | 9.97E-01 | 5.52E-01 | 4.18E-01 |
| 252.2037  | 292.6  | 17.06 | 16.45 | 16.38 | 16.39 | 8.46E-03 | 4.46E-02 | 1.78E-02 | 2.74E-02 | 9.91E-01 | 9.95E-01 | 1.00E+00 |
| 252.2322  | 205.82 | 16.27 | 12.56 | 12.52 | 13.48 | 1.35E-13 | 3.07E-11 | 1.23E-11 | 1.31E-06 | 1.00E+00 | 3.21E-01 | 2.75E-01 |
| 252.51758 | 265.06 | 14.74 | 15.22 | 15.97 | 14.97 | 1.77E-08 | 7.34E-02 | 9.00E-09 | 6.70E-01 | 1.41E-03 | 6.26E-01 | 1.40E-05 |
| 252.52949 | 86.03  | 14.98 | 14.86 | 15.34 | 15.14 | 4.40E-01 | 9.79E-01 | 6.13E-01 | 9.58E-01 | 3.99E-01 | 8.24E-01 | 9.12E-01 |
| 252.64148 | 27.85  | 13.72 | 17.94 | 17.20 | 17.38 | 2.88E-35 | 3.65E-14 | 4.23E-14 | 4.07E-14 | 8.24E-02 | 2.97E-01 | 9.45E-01 |
| 252.86567 | 47.41  | 16.28 | 17.43 | 17.51 | 17.30 | 5.27E-24 | 7.49E-14 | 6.89E-14 | 9.27E-14 | 9.25E-01 | 7.14E-01 | 3.39E-01 |
| 252.8821  | 47.8   | 12.07 | 12.87 | 15.97 | 14.55 | 6.15E-07 | 6.81E-01 | 7.35E-07 | 5.01E-03 | 2.26E-04 | 1.25E-01 | 2.43E-01 |
| 252.91133 | 42.35  | 16.13 | 17.40 | 17.49 | 18.23 | 6.81E-12 | 1.60E-05 | 2.76E-06 | 2.19E-12 | 9.88E-01 | 1.82E-02 | 4.10E-02 |
| 252.9184  | 261.15 | 19.94 | 20.73 | 20.12 | 20.37 | 2.04E-02 | 1.36E-02 | 8.91E-01 | 3.64E-01 | 1.04E-01 | 5.63E-01 | 7.95E-01 |
| 252.95072 | 36.74  | 21.80 | 24.78 | 24.48 | 24.02 | 1.60E-61 | 3.65E-14 | 3.65E-14 | 3.65E-14 | 1.48E-01 | 2.30E-06 | 8.41E-03 |
| 252.97203 | 60.3   | 17.26 | 19.36 | 20.57 | 19.29 | 5.60E-25 | 2.66E-12 | 3.74E-14 | 3.66E-11 | 1.23E-04 | 9.96E-01 | 7.22E-05 |
| 252.99647 | 68.23  | 17.39 | 12.27 | 16.36 | 19.23 | 1.40E-46 | 3.65E-14 | 1.99E-02 | 4.90E-06 | 5.01E-14 | 3.65E-14 | 2.50E-12 |
| 252.99664 | 185.72 | 16.74 | 14.41 | 15.02 | 15.53 | 1.82E-30 | 3.65E-14 | 7.27E-14 | 3.03E-10 | 3.64E-03 | 1.89E-08 | 2.43E-02 |
| 253.00834 | 268.3  | 15.79 | 16.76 | 17.13 | 16.80 | 2.65E-05 | 3.96E-03 | 1.80E-05 | 3.47E-03 | 5.75E-01 | 9.99E-01 | 6.73E-01 |
| 253.02048 | 83.7   | 15.63 | 14.79 | 15.67 | 14.64 | 1.42E-03 | 4.25E-02 | 1.00E+00 | 1.39E-02 | 3.84E-02 | 9.70E-01 | 1.27E-02 |
| 253.03158 | 67.61  | 18.91 | 19.07 | 18.99 | 19.56 | 5.67E-03 | 8.31E-01 | 9.76E-01 | 4.55E-03 | 9.74E-01 | 6.50E-02 | 1.99E-02 |
| 253.04059 | 59.57  | 15.96 | 15.08 | 15.05 | 15.66 | 4.06E-02 | 8.74E-02 | 6.90E-02 | 8.66E-01 | 1.00E+00 | 4.50E-01 | 4.00E-01 |
| 253.04802 | 42.32  | 12.80 | 15.71 | 13.06 | 14.99 | 4.50E-07 | 5.74E-06 | 9.69E-01 | 1.58E-03 | 6.97E-05 | 6.39E-01 | 9.04E-03 |
| 253.05697 | 37.4   | 20.53 | 20.90 | 20.10 | 19.90 | 1.91E-03 | 4.92E-01 | 3.49E-01 | 9.83E-02 | 1.66E-02 | 2.40E-03 | 8.98E-01 |
| 253.07934 | 67.33  | 18.04 | 18.42 | 18.89 | 17.83 | 2.99E-10 | 5.23E-02 | 1.86E-07 | 5.59E-01 | 1.40E-02 | 1.57E-03 | 1.07E-09 |
| 253.11103 | 90.03  | 13.84 | 15.45 | 14.54 | 14.94 | 1.12E-02 | 6.06E-03 | 4.67E-01 | 1.27E-01 | 2.67E-01 | 7.55E-01 | 8.65E-01 |
| 253.1182  | 201.6  | 17.43 | 14.64 | 14.64 | 15.27 | 2.83E-40 | 3.65E-14 | 3.65E-14 | 5.47E-14 | 1.00E+00 | 1.14E-02 | 9.73E-03 |
| 253.11829 | 40.96  | 17.83 | 16.37 | 16.55 | 17.04 | 6.78E-12 | 4.27E-11 | 5.74E-09 | 9.86E-04 | 8.09E-01 | 1.03E-02 | 1.02E-01 |
| 253.12947 | 68.69  | 16.50 | 14.56 | 15.13 | 13.31 | 5.21E-07 | 1.95E-03 | 4.96E-02 | 1.20E-07 | 7.25E-01 | 1.23E-01 | 7.31E-03 |
| 253.14328 | 186.64 | 16.85 | 14.87 | 15.36 | 15.60 | 7.51E-31 | 3.65E-14 | 7.27E-14 | 1.07E-13 | 5.94E-03 | 2.09E-05 | 3.99E-01 |
| 253.17989 | 174.65 | 17.55 | 15.45 | 15.41 | 15.79 | 1.21E-26 | 6.36E-14 | 5.41E-14 | 7.43E-14 | 9.97E-01 | 3.48E-01 | 2.44E-01 |
| 253.21587 | 24.41  | 18.78 | 17.82 | 17.35 | 17.52 | 2.13E-18 | 8.54E-09 | 7.46E-14 | 4.43E-13 | 1.80E-02 | 2.73E-01 | 7.13E-01 |
| 253.21607 | 275.93 | 20.96 | 20.33 | 20.29 | 20.61 | 5.43E-02 | 9.67E-02 | 6.41E-02 | 5.77E-01 | 9.99E-01 | 7.78E-01 | 6.90E-01 |
| 253.25235 | 289.67 | 19.53 | 18.63 | 18.58 | 18.58 | 1.28E-02 | 4.58E-02 | 3.03E-02 | 3.82E-02 | 9.99E-01 | 9.99E-01 | 1.00E+00 |
| 253.43504 | 301.56 | 16.53 | 16.15 | 14.98 | 16.98 | 1.49E-11 | 4.75E-01 | 3.83E-08 | 3.15E-01 | 8.45E-05 | 1.45E-02 | 1.87E-11 |
| 253.53003 | 86.54  | 15.36 | 16.10 | 16.29 | 16.14 | 3.97E-03 | 3.87E-02 | 4.31E-03 | 3.37E-02 | 9.07E-01 | 9.99E-01 | 9.49E-01 |
| 253.54616 | 94.89  | 16.78 | 15.41 | 15.75 | 15.49 | 1.14E-04 | 2.61E-04 | 1.05E-02 | 1.05E-03 | 7.30E-01 | 9.95E-01 | 8.71E-01 |
| 253.55967 | 90.24  | 15.55 | 15.38 | 16.21 | 15.08 | 1.81E-03 | 9.33E-01 | 8.66E-02 | 3.73E-01 | 2.31E-02 | 7.49E-01 | 1.03E-03 |
| 253.63116 | 27.74  | 17.23 | 20.25 | 19.61 | 19.84 | 6.21E-35 | 3.65E-14 | 5.36E-14 | 4.05E-14 | 2.07E-02 | 2.83E-01 | 7.28E-01 |
| 253.9466  | 48.19  | 20.70 | 20.70 | 21.09 | 20.06 | 3.24E-06 | 1.00E+00 | 1.23E-01 | 3.06E-03 | 1.45E-01 | 4.37E-03 | 5.73E-07 |
| 253.95445 | 38.94  | 17.80 | 20.65 | 20.43 | 19.82 | 1.96E-58 | 3.65E-14 | 3.65E-14 | 3.65E-14 | 4.09E-01 | 1.80E-07 | 1.61E-04 |
| 253.97483 | 38.87  | 17.05 | 12.56 | 15.10 | 14.98 | 1.09E-20 | 5.65E-14 | 1.19E-05 | 7.45E-06 | 2.37E-08 | 2.68E-07 | 9.93E-01 |
| 253.99097 | 88.83  | 16.43 | 16.82 | 17.87 | 16.75 | 9.27E-09 | 3.12E-01 | 4.83E-09 | 5.25E-01 | 5.81E-05 | 9.89E-01 | 2.37E-05 |
| 253.99718 | 44.13  | 16.20 | 13.25 | 16.32 | 16.73 | 3.59E-13 | 1.47E-09 | 9.94E-01 | 6.60E-01 | 8.45E-10 | 1.92E-11 | 8.19E-01 |
| 254.0085  | 303.75 | 11.75 | 14.33 | 11.34 | 10.34 | 2.18E-15 | 4.19E-08 | 7.61E-01 | 8.05E-03 | 4.85E-10 | 7.72E-14 | 1.21E-01 |

|           |        |       |       |       |       |          |          |          |          |          |          |          |
|-----------|--------|-------|-------|-------|-------|----------|----------|----------|----------|----------|----------|----------|
| 254.01022 | 98.85  | 19.12 | 14.10 | 15.27 | 15.66 | 3.78E-32 | 3.65E-14 | 6.56E-14 | 7.29E-14 | 9.16E-03 | 3.42E-04 | 7.31E-01 |
| 254.01912 | 87.64  | 20.22 | 21.92 | 21.66 | 21.36 | 2.84E-22 | 6.83E-14 | 7.51E-14 | 2.51E-10 | 4.10E-01 | 6.11E-03 | 2.67E-01 |
| 254.02756 | 87.75  | 15.36 | 16.54 | 16.66 | 16.26 | 1.14E-08 | 1.10E-06 | 4.47E-08 | 4.72E-04 | 9.44E-01 | 6.31E-01 | 3.01E-01 |
| 254.06158 | 44.69  | 16.32 | 18.13 | 15.72 | 15.77 | 1.56E-10 | 5.35E-06 | 3.20E-01 | 4.38E-01 | 1.88E-09 | 1.40E-08 | 9.99E-01 |
| 254.07346 | 57.53  | 16.64 | 16.46 | 17.05 | 16.01 | 9.08E-07 | 7.23E-01 | 8.72E-02 | 2.29E-03 | 6.01E-03 | 6.39E-02 | 1.86E-07 |
| 254.13309 | 164.53 | 18.84 | 15.92 | 16.11 | 16.59 | 3.67E-42 | 3.65E-14 | 3.65E-14 | 4.12E-14 | 7.60E-01 | 4.43E-03 | 6.76E-02 |
| 254.13855 | 177.52 | 17.60 | 15.26 | 15.31 | 15.71 | 2.33E-37 | 3.65E-14 | 3.65E-14 | 5.70E-14 | 9.93E-01 | 5.62E-02 | 1.02E-01 |
| 254.16107 | 57     | 15.63 | 14.72 | 14.78 | 14.75 | 3.40E-02 | 6.27E-02 | 8.92E-02 | 8.63E-02 | 9.98E-01 | 1.00E+00 | 1.00E+00 |
| 254.17504 | 211.37 | 16.03 | 12.06 | 13.20 | 12.15 | 5.04E-14 | 3.80E-12 | 5.82E-07 | 3.31E-11 | 1.46E-01 | 9.99E-01 | 2.22E-01 |
| 254.21942 | 280.26 | 17.56 | 16.50 | 16.14 | 16.27 | 3.12E-10 | 1.48E-05 | 1.93E-09 | 1.70E-07 | 3.52E-01 | 7.41E-01 | 9.36E-01 |
| 254.21944 | 19.8   | 16.84 | 14.27 | 13.71 | 14.34 | 1.37E-33 | 5.05E-14 | 3.65E-14 | 6.47E-14 | 8.15E-02 | 9.92E-01 | 4.59E-02 |
| 254.24763 | 22.05  | 16.60 | 13.60 | 13.93 | 14.37 | 2.71E-64 | 3.65E-14 | 3.65E-14 | 3.65E-14 | 6.43E-02 | 5.05E-07 | 9.64E-03 |
| 254.24766 | 277.79 | 17.74 | 17.00 | 16.64 | 16.47 | 7.72E-09 | 1.96E-03 | 7.67E-07 | 3.44E-08 | 3.10E-01 | 7.19E-02 | 8.65E-01 |
| 254.25597 | 177.8  | 17.35 | 14.36 | 14.53 | 15.03 | 6.62E-39 | 3.65E-14 | 3.65E-14 | 5.47E-14 | 8.52E-01 | 1.10E-02 | 8.80E-02 |
| 254.56303 | 86.09  | 15.17 | 16.39 | 15.98 | 16.04 | 1.40E-09 | 6.94E-10 | 5.87E-05 | 2.50E-05 | 1.17E-01 | 2.67E-01 | 9.86E-01 |
| 254.81461 | 47.31  | 21.38 | 22.64 | 22.69 | 22.15 | 2.22E-18 | 8.23E-14 | 7.41E-14 | 3.60E-06 | 9.87E-01 | 9.10E-03 | 2.78E-03 |
| 254.82347 | 49.95  | 16.40 | 18.00 | 18.01 | 17.95 | 6.55E-05 | 6.19E-04 | 4.56E-04 | 1.43E-03 | 1.00E+00 | 9.99E-01 | 9.99E-01 |
| 254.91468 | 21.46  | 16.34 | 10.61 | 11.19 | 11.71 | 1.82E-83 | 3.65E-14 | 3.65E-14 | 3.65E-14 | 2.36E-02 | 1.55E-06 | 5.28E-02 |
| 254.95025 | 57.81  | 19.06 | 21.97 | 21.77 | 21.18 | 6.30E-59 | 3.65E-14 | 3.65E-14 | 3.65E-14 | 4.73E-01 | 1.11E-06 | 4.60E-04 |
| 254.97251 | 63.8   | 16.80 | 12.58 | 14.83 | 15.88 | 3.34E-30 | 3.65E-14 | 4.44E-09 | 2.10E-02 | 9.32E-11 | 7.27E-14 | 7.57E-03 |
| 254.99423 | 96.5   | 18.47 | 16.70 | 16.63 | 16.91 | 2.93E-10 | 4.39E-08 | 9.53E-09 | 2.99E-06 | 9.96E-01 | 9.11E-01 | 8.14E-01 |
| 255.01152 | 307.95 | 14.43 | 14.53 | 13.86 | 13.54 | 6.73E-05 | 9.74E-01 | 5.53E-02 | 9.97E-04 | 2.26E-02 | 3.35E-04 | 5.47E-01 |
| 255.02709 | 269.33 | 16.45 | 18.83 | 19.37 | 18.26 | 1.07E-22 | 7.58E-14 | 5.83E-14 | 2.15E-09 | 2.09E-01 | 1.79E-01 | 5.92E-04 |
| 255.03894 | 85.45  | 15.52 | 16.46 | 16.49 | 16.23 | 8.28E-10 | 5.13E-08 | 1.18E-08 | 1.10E-04 | 9.97E-01 | 4.92E-01 | 3.64E-01 |
| 255.05275 | 109.88 | 14.24 | 17.33 | 16.69 | 15.27 | 1.42E-08 | 3.86E-08 | 1.50E-05 | 2.04E-01 | 6.12E-01 | 1.07E-03 | 4.41E-02 |
| 255.06474 | 159.48 | 17.84 | 19.78 | 19.57 | 19.98 | 9.88E-13 | 1.33E-09 | 5.14E-08 | 7.22E-11 | 8.94E-01 | 9.15E-01 | 5.33E-01 |
| 255.09758 | 49.11  | 17.20 | 16.02 | 16.02 | 15.98 | 1.10E-10 | 4.57E-08 | 3.84E-08 | 3.80E-08 | 1.00E+00 | 9.98E-01 | 9.97E-01 |
| 255.10076 | 110.96 | 14.84 | 14.49 | 14.12 | 14.12 | 6.84E-05 | 1.78E-01 | 2.44E-04 | 4.25E-04 | 1.71E-01 | 1.93E-01 | 1.00E+00 |
| 255.13396 | 219.23 | 16.76 | 15.87 | 15.68 | 16.23 | 3.85E-09 | 2.25E-06 | 6.24E-09 | 1.55E-02 | 7.18E-01 | 1.80E-01 | 1.25E-02 |
| 255.14516 | 60.88  | 18.25 | 18.20 | 18.13 | 18.03 | 6.90E-01 | 9.94E-01 | 9.12E-01 | 6.52E-01 | 9.81E-01 | 8.16E-01 | 9.56E-01 |
| 255.15897 | 20.84  | 16.69 | 12.95 | 14.38 | 15.23 | 2.64E-38 | 3.65E-14 | 7.41E-14 | 1.27E-08 | 2.46E-08 | 7.47E-14 | 2.75E-03 |
| 255.15917 | 198.65 | 17.57 | 15.37 | 15.08 | 15.44 | 2.41E-29 | 6.56E-14 | 3.74E-14 | 7.36E-14 | 5.36E-01 | 9.87E-01 | 3.55E-01 |
| 255.19534 | 20.38  | 16.68 | 13.81 | 13.46 | 14.29 | 2.25E-39 | 3.65E-14 | 3.65E-14 | 5.81E-14 | 3.65E-01 | 1.39E-01 | 1.22E-03 |
| 255.1956  | 174.81 | 17.77 | 15.65 | 15.37 | 16.15 | 5.17E-25 | 7.26E-14 | 4.94E-14 | 1.70E-11 | 5.74E-01 | 1.20E-01 | 3.19E-03 |
| 255.2105  | 26.96  | 16.55 | 10.53 | 12.41 | 14.85 | 9.44E-24 | 5.07E-14 | 1.10E-12 | 1.12E-02 | 3.83E-03 | 3.49E-12 | 1.12E-04 |
| 255.23155 | 24.35  | 19.26 | 18.05 | 17.11 | 18.18 | 5.67E-24 | 7.35E-10 | 3.83E-14 | 8.54E-08 | 3.43E-06 | 9.07E-01 | 2.25E-07 |
| 255.24297 | 207.29 | 16.33 | 13.71 | 13.90 | 14.01 | 6.12E-20 | 7.46E-14 | 8.07E-14 | 4.89E-13 | 9.12E-01 | 7.47E-01 | 9.83E-01 |
| 255.26826 | 198.78 | 16.52 | 13.83 | 14.37 | 14.67 | 2.69E-14 | 1.57E-13 | 1.25E-09 | 4.91E-07 | 3.69E-01 | 7.52E-02 | 8.23E-01 |
| 255.56581 | 86.05  | 14.85 | 14.61 | 15.08 | 14.88 | 5.33E-01 | 8.56E-01 | 8.79E-01 | 1.00E+00 | 4.41E-01 | 8.32E-01 | 9.30E-01 |
| 255.81896 | 46.45  | 15.35 | 14.41 | 14.51 | 14.61 | 1.37E-05 | 3.77E-05 | 2.34E-04 | 2.81E-03 | 9.67E-01 | 7.81E-01 | 9.58E-01 |
| 255.9527  | 38.32  | 15.87 | 17.17 | 16.86 | 16.50 | 9.77E-16 | 7.58E-14 | 5.13E-10 | 2.49E-04 | 1.57E-01 | 1.16E-04 | 8.94E-02 |
| 255.97891 | 25.74  | 17.47 | 19.46 | 16.79 | 16.05 | 1.28E-33 | 7.65E-14 | 1.34E-02 | 2.19E-08 | 4.32E-14 | 3.65E-14 | 1.07E-02 |
| 256.00301 | 29.34  | 17.74 | 8.45  | 8.93  | 11.45 | 5.19E-78 | 3.65E-14 | 3.65E-14 | 3.65E-14 | 5.34E-01 | 1.71E-13 | 1.88E-10 |
| 256.00684 | 126.64 | 17.03 | 17.36 | 15.65 | 15.95 | 3.83E-07 | 7.50E-01 | 1.89E-04 | 8.40E-03 | 4.78E-06 | 4.11E-04 | 8.20E-01 |
| 256.01708 | 83.38  | 16.09 | 17.35 | 17.05 | 16.75 | 4.55E-03 | 2.96E-03 | 3.73E-02 | 2.75E-01 | 8.43E-01 | 3.95E-01 | 8.61E-01 |
| 256.03029 | 83.49  | 15.69 | 16.95 | 18.16 | 18.12 | 1.99E-31 | 4.57E-09 | 3.67E-14 | 3.87E-14 | 5.11E-08 | 3.41E-07 | 9.98E-01 |
| 256.03672 | 251.16 | 13.31 | 10.14 | 14.36 | 12.84 | 6.08E-11 | 3.08E-07 | 2.41E-01 | 8.46E-01 | 2.70E-11 | 5.59E-05 | 5.23E-02 |
| 256.0455  | 258.57 | 16.39 | 17.21 | 16.09 | 15.13 | 9.18E-13 | 4.10E-03 | 5.85E-01 | 3.12E-06 | 4.87E-05 | 1.68E-13 | 8.58E-04 |
| 256.06028 | 80.2   | 20.31 | 17.89 | 18.72 | 18.05 | 3.86E-23 | 6.94E-14 | 1.36E-10 | 7.47E-14 | 2.70E-03 | 9.06E-01 | 3.04E-02 |
| 256.06789 | 151.97 | 12.27 | 14.63 | 14.81 | 15.51 | 1.70E-17 | 4.24E-10 | 1.51E-11 | 7.35E-14 | 9.63E-01 | 7.80E-02 | 2.07E-01 |
| 256.11785 | 22.9   | 16.78 | 15.56 | 15.53 | 14.81 | 3.61E-14 | 7.99E-07 | 3.18E-07 | 8.54E-14 | 9.99E-01 | 9.63E-03 | 1.31E-02 |
| 256.11805 | 172.6  | 17.19 | 14.56 | 14.64 | 15.22 | 4.94E-36 | 3.65E-14 | 3.65E-14 | 7.26E-14 | 9.80E-01 | 6.74E-03 | 1.98E-02 |
| 256.14624 | 35.86  | 14.68 | 15.60 | 12.53 | 15.16 | 2.76E-09 | 2.01E-01 | 3.63E-05 | 7.47E-01 | 5.23E-09 | 8.09E-01 | 1.29E-06 |
| 256.15431 | 266.62 | 17.88 | 15.94 | 15.67 | 16.13 | 9.10E-26 | 7.34E-14 | 4.72E-14 | 7.82E-14 | 5.04E-01 | 8.00E-01 | 1.06E-01 |
| 256.19072 | 212.8  | 16.47 | 13.45 | 13.18 | 14.26 | 3.97E-25 | 7.36E-14 | 5.23E-14 | 3.31E-11 | 8.11E-01 | 4.93E-02 | 3.33E-03 |
| 256.23499 | 292.58 | 18.06 | 17.01 | 16.90 | 17.27 | 8.62E-06 | 1.37E-04 | 1.81E-05 | 9.44E-03 | 9.76E-01 | 7.43E-01 | 4.86E-01 |
| 256.23505 | 19.89  | 17.33 | 13.22 | 13.85 | 14.80 | 1.24E-65 | 3.65E-14 | 3.65E-14 | 3.65E-14 | 2.42E-03 | 7.99E-14 | 1.88E-06 |
| 256.26343 | 174.13 | 21.12 | 20.42 | 18.70 | 20.28 | 4.17E-09 | 2.27E-01 | 9.35E-10 | 1.15E-01 | 3.68E-05 | 9.83E-01 | 2.83E-04 |
| 256.51146 | 307.13 | 14.81 | 14.51 | 13.44 | 13.22 | 2.98E-10 | 6.57E-01 | 9.52E-07 | 3.53E-08 | 3.21E-04 | 1.87E-05 | 8.48E-01 |
| 256.54012 | 84.75  | 15.02 | 16.37 | 16.27 | 15.79 | 1.95E-10 | 2.09E-09 | 2.22E-08 | 1.73E-03 | 9.64E-01 | 4.23E-02 | 1.24E-01 |
| 256.5624  | 92.52  | 17.44 | 16.72 | 16.33 | 16.65 | 2.29E-04 | 2.70E-02 | 1.04E-04 | 1.53E-02 | 4.43E-01 | 9.94E-01 | 6.29E-01 |
| 256.65108 | 77.3   | 15.16 | 16.69 | 16.93 | 15.38 | 3.77E-14 | 1.40E-08 | 3.41E-11 | 8.11E-01 | 7.71E-01 | 6.22E-06 | 4.69E-08 |
| 256.81208 | 47.08  | 21.08 | 22.34 | 22.41 | 21.92 | 2.06E-28 | 5.12E-14 | 3.87E-14 | 2.17E-11 | 9.23E-01 | 2.75E-03 | 2.44E-04 |
| 256.82056 | 49.61  | 18.16 | 18.86 | 18.56 | 18.98 | 9.29E-03 | 3.14E-02 | 3.91E-01 | 1.11E-02 | 6.49E-01 | 9.76E-01 | 4.07E-01 |
| 256.88993 | 246.96 | 18.62 | 16.46 | 16.38 | 17.66 | 1.79E-08 | 8.74E-07 | 2.55E-07 | 9.09E-02 | 9.98E-01 | 2.41E-02 | 1.30E-02 |
| 256.91177 | 111.29 | 12.80 | 13.74 | 14.98 | 14.18 | 1.30E-07 | 4.79E-02 | 2.78E-08 | 1.33E-03 | 5.08E-03 | 6.49E-01 | 1.56E-01 |
| 256.94005 | 307.02 | 10.62 | 14.57 | 12.03 | 11.17 | 1.99E-28 | 3.67E-14 | 3.58E-05 | 2.97E-01 | 3.56E-13 | 7.16E-14 | 4.19E-02 |
| 256.9737  | 44.2   | 16.31 | 18.06 | 19.40 | 18.42 | 4.80E-45 | 7.16E-14 | 3.65E-14 | 3.76E-14 | 1.65E-12 | 1.73E-01 | 5.37E-07 |

|           |        |       |       |       |       |          |          |          |          |          |          |          |
|-----------|--------|-------|-------|-------|-------|----------|----------|----------|----------|----------|----------|----------|
| 256.98292 | 38.97  | 15.94 | 14.63 | 15.37 | 14.12 | 2.44E-06 | 9.20E-04 | 3.35E-01 | 2.93E-06 | 1.50E-01 | 5.02E-01 | 3.39E-03 |
| 256.992   | 196.59 | 13.38 | 18.68 | 19.08 | 16.18 | 4.83E-38 | 3.65E-14 | 3.65E-14 | 1.70E-10 | 7.49E-01 | 3.55E-08 | 1.11E-10 |
| 257.01816 | 87.58  | 14.77 | 15.71 | 15.33 | 14.75 | 1.28E-01 | 1.73E-01 | 6.05E-01 | 1.00E+00 | 8.52E-01 | 1.95E-01 | 6.14E-01 |
| 257.05357 | 45.81  | 15.80 | 15.81 | 16.39 | 15.99 | 5.31E-02 | 1.00E+00 | 5.96E-02 | 8.68E-01 | 8.19E-02 | 8.97E-01 | 3.67E-01 |
| 257.06304 | 77.6   | 16.40 | 16.74 | 15.76 | 16.76 | 4.16E-04 | 5.42E-01 | 5.18E-02 | 5.12E-01 | 1.09E-03 | 1.00E+00 | 1.15E-03 |
| 257.07668 | 220.32 | 16.51 | 19.28 | 20.14 | 18.97 | 1.54E-32 | 6.63E-14 | 3.65E-14 | 7.38E-14 | 7.14E-03 | 6.71E-01 | 1.41E-04 |
| 257.08957 | 238.94 | 15.21 | 14.95 | 17.20 | 16.61 | 1.58E-10 | 8.82E-01 | 1.75E-07 | 7.27E-04 | 1.04E-08 | 7.06E-05 | 3.74E-01 |
| 257.11313 | 277.31 | 17.45 | 15.46 | 15.38 | 15.75 | 7.59E-17 | 3.98E-13 | 9.65E-14 | 1.01E-09 | 9.86E-01 | 6.92E-01 | 4.76E-01 |
| 257.1132  | 28.34  | 16.89 | 12.65 | 12.97 | 14.73 | 9.30E-46 | 3.65E-14 | 3.65E-14 | 1.10E-13 | 6.17E-01 | 1.12E-12 | 8.44E-10 |
| 257.11326 | 181.37 | 18.02 | 15.29 | 15.09 | 15.77 | 3.66E-34 | 3.70E-14 | 3.65E-14 | 7.36E-14 | 8.04E-01 | 1.66E-01 | 1.73E-02 |
| 257.11655 | 53.27  | 15.22 | 13.62 | 14.74 | 15.12 | 3.50E-03 | 3.54E-03 | 7.31E-01 | 9.97E-01 | 8.30E-02 | 1.27E-02 | 8.67E-01 |
| 257.12462 | 73.01  | 18.30 | 18.68 | 18.84 | 18.37 | 1.17E-02 | 1.68E-01 | 1.65E-02 | 9.86E-01 | 8.20E-01 | 3.71E-01 | 6.59E-02 |
| 257.13832 | 229.61 | 16.38 | 13.11 | 13.34 | 13.37 | 5.17E-12 | 6.05E-10 | 5.72E-09 | 2.83E-08 | 9.70E-01 | 9.58E-01 | 1.00E+00 |
| 257.14715 | 50.21  | 20.34 | 21.59 | 21.21 | 21.68 | 8.19E-09 | 3.50E-07 | 5.38E-04 | 8.70E-08 | 3.62E-01 | 9.78E-01 | 1.92E-01 |
| 257.17486 | 177.82 | 16.87 | 14.28 | 14.40 | 14.98 | 6.40E-20 | 7.49E-14 | 7.47E-14 | 8.64E-10 | 9.75E-01 | 8.29E-02 | 1.93E-01 |
| 257.18962 | 24.52  | 16.87 | 12.29 | 14.27 | 15.95 | 8.50E-38 | 3.65E-14 | 7.38E-14 | 1.31E-02 | 1.77E-09 | 4.12E-14 | 7.26E-07 |
| 257.21105 | 178.23 | 16.68 | 14.04 | 14.30 | 15.12 | 4.87E-25 | 5.25E-14 | 7.43E-14 | 3.29E-09 | 7.01E-01 | 1.40E-04 | 6.23E-03 |
| 257.22606 | 24.73  | 17.55 | 12.04 | 13.33 | 14.56 | 4.66E-44 | 3.65E-14 | 3.65E-14 | 7.56E-14 | 4.17E-04 | 3.94E-12 | 1.24E-03 |
| 257.24726 | 22.44  | 19.06 | 15.33 | 16.18 | 16.37 | 1.57E-58 | 3.65E-14 | 3.65E-14 | 3.65E-14 | 1.06E-05 | 1.52E-07 | 7.27E-01 |
| 257.24741 | 293.69 | 18.68 | 17.20 | 17.34 | 17.05 | 2.81E-10 | 9.33E-08 | 1.26E-06 | 8.80E-09 | 9.46E-01 | 9.40E-01 | 6.79E-01 |
| 257.26665 | 294.75 | 18.18 | 18.02 | 17.96 | 17.60 | 3.38E-01 | 9.57E-01 | 8.85E-01 | 2.62E-01 | 9.97E-01 | 5.67E-01 | 6.90E-01 |
| 257.53768 | 91.34  | 18.87 | 14.63 | 15.90 | 14.89 | 1.09E-25 | 5.14E-14 | 5.71E-13 | 7.07E-14 | 6.23E-03 | 9.19E-01 | 5.24E-02 |
| 257.57282 | 78.8   | 16.76 | 18.46 | 17.92 | 17.92 | 5.33E-15 | 7.59E-14 | 3.62E-08 | 1.08E-07 | 3.58E-02 | 4.57E-02 | 1.00E+00 |
| 257.63378 | 27.87  | 15.43 | 17.89 | 17.07 | 17.65 | 1.55E-39 | 3.65E-14 | 7.14E-14 | 3.65E-14 | 6.26E-06 | 5.04E-01 | 3.22E-03 |
| 257.92404 | 248.74 | 16.34 | 14.77 | 14.88 | 15.40 | 2.31E-03 | 3.54E-03 | 7.23E-03 | 1.77E-01 | 9.95E-01 | 5.66E-01 | 7.05E-01 |
| 257.92407 | 127.76 | 15.46 | 16.59 | 17.99 | 16.57 | 1.50E-05 | 9.80E-02 | 2.49E-06 | 1.21E-01 | 2.93E-02 | 1.00E+00 | 3.23E-02 |
| 257.94847 | 22.41  | 15.70 | 13.73 | 14.81 | 14.49 | 8.49E-05 | 2.31E-05 | 1.35E-01 | 2.45E-02 | 5.91E-02 | 3.22E-01 | 8.81E-01 |
| 257.99481 | 68.45  | 21.07 | 19.80 | 20.06 | 20.06 | 1.76E-28 | 3.72E-14 | 7.59E-14 | 7.36E-14 | 6.37E-02 | 6.80E-02 | 1.00E+00 |
| 258.00602 | 73.91  | 16.37 | 11.26 | 12.03 | 12.15 | 5.26E-17 | 7.59E-14 | 8.02E-12 | 1.22E-10 | 5.72E-01 | 4.80E-01 | 9.98E-01 |
| 258.0608  | 52.97  | 17.02 | 18.74 | 19.19 | 18.59 | 6.10E-07 | 1.34E-04 | 6.14E-07 | 9.49E-04 | 6.91E-01 | 9.82E-01 | 4.72E-01 |
| 258.09717 | 111.3  | 18.92 | 9.94  | 9.96  | 11.39 | 1.62E-66 | 3.65E-14 | 3.65E-14 | 3.65E-14 | 1.00E+00 | 4.62E-03 | 4.86E-03 |
| 258.10889 | 277.6  | 21.37 | 27.31 | 21.91 | 25.76 | 2.50E-14 | 6.12E-12 | 8.96E-01 | 8.17E-07 | 9.63E-10 | 2.44E-01 | 3.22E-05 |
| 258.16959 | 218.87 | 18.56 | 14.29 | 15.00 | 15.83 | 1.78E-30 | 3.65E-14 | 5.72E-14 | 2.08E-13 | 1.42E-01 | 6.46E-05 | 7.15E-02 |
| 258.26089 | 82.9   | 15.79 | 14.63 | 15.34 | 14.54 | 9.44E-05 | 8.93E-04 | 4.42E-01 | 4.30E-04 | 9.90E-02 | 9.92E-01 | 5.73E-02 |
| 258.27898 | 22.81  | 17.70 | 16.98 | 17.13 | 17.85 | 4.31E-06 | 5.66E-04 | 1.06E-02 | 8.59E-01 | 8.33E-01 | 6.13E-05 | 1.40E-03 |
| 258.50436 | 30.84  | 14.55 | 11.33 | 16.48 | 13.77 | 1.64E-34 | 7.49E-14 | 5.88E-08 | 9.58E-02 | 3.65E-14 | 1.38E-10 | 8.81E-13 |
| 258.62316 | 27.55  | 15.76 | 19.32 | 18.00 | 18.82 | 2.35E-45 | 3.65E-14 | 5.50E-14 | 3.65E-14 | 7.47E-09 | 9.52E-02 | 9.10E-04 |
| 258.64154 | 28.52  | 17.26 | 21.84 | 20.94 | 20.93 | 3.27E-56 | 3.65E-14 | 3.65E-14 | 3.65E-14 | 5.73E-04 | 8.78E-04 | 1.00E+00 |
| 258.65009 | 27.04  | 14.55 | 12.66 | 17.96 | 15.20 | 4.54E-17 | 2.57E-03 | 3.76E-09 | 6.40E-01 | 7.43E-14 | 6.37E-05 | 8.76E-06 |
| 258.81031 | 46.1   | 19.31 | 20.29 | 20.40 | 19.90 | 3.50E-25 | 7.47E-14 | 5.01E-14 | 7.92E-08 | 6.94E-01 | 9.62E-04 | 9.70E-06 |
| 258.81755 | 49.32  | 17.18 | 17.38 | 17.23 | 17.57 | 4.57E-01 | 8.71E-01 | 9.98E-01 | 4.35E-01 | 9.42E-01 | 8.81E-01 | 5.65E-01 |
| 258.8992  | 48.39  | 20.33 | 20.40 | 20.66 | 20.52 | 4.96E-03 | 8.93E-01 | 3.59E-03 | 2.21E-01 | 4.22E-02 | 6.32E-01 | 5.10E-01 |
| 258.9437  | 25.27  | 16.23 | 18.04 | 19.86 | 18.89 | 1.45E-51 | 7.32E-14 | 3.65E-14 | 3.65E-14 | 7.45E-14 | 7.21E-05 | 4.13E-06 |
| 258.95833 | 50.98  | 17.55 | 17.78 | 19.03 | 17.55 | 1.40E-12 | 6.76E-01 | 4.48E-11 | 1.00E+00 | 7.96E-08 | 7.30E-01 | 5.75E-10 |
| 258.97996 | 49.8   | 14.43 | 16.99 | 18.48 | 17.57 | 1.08E-28 | 2.25E-13 | 3.65E-14 | 7.59E-14 | 4.05E-05 | 3.06E-01 | 3.32E-02 |
| 258.98975 | 46.49  | 21.37 | 20.66 | 20.53 | 19.93 | 4.62E-10 | 1.90E-03 | 1.18E-04 | 6.18E-11 | 9.13E-01 | 2.90E-03 | 2.06E-02 |
| 258.99747 | 49.02  | 17.39 | 14.92 | 16.33 | 15.78 | 1.11E-24 | 3.85E-14 | 2.11E-06 | 2.34E-12 | 8.16E-10 | 6.26E-04 | 4.85E-02 |
| 259.02103 | 295.84 | 11.28 | 16.82 | 16.72 | 13.70 | 1.26E-35 | 3.65E-14 | 3.65E-14 | 1.93E-07 | 9.96E-01 | 6.95E-11 | 1.74E-10 |
| 259.03864 | 100.49 | 17.70 | 9.80  | 8.74  | 8.98  | 1.85E-45 | 3.65E-14 | 3.65E-14 | 3.65E-14 | 2.48E-01 | 5.02E-01 | 9.78E-01 |
| 259.05861 | 73.73  | 18.41 | 18.99 | 19.56 | 18.76 | 2.05E-09 | 4.16E-03 | 4.03E-10 | 1.95E-01 | 6.15E-03 | 5.64E-01 | 5.66E-05 |
| 259.06584 | 85.51  | 15.27 | 16.08 | 14.64 | 15.45 | 5.45E-03 | 1.57E-01 | 3.61E-01 | 9.70E-01 | 1.99E-03 | 4.10E-01 | 1.99E-01 |
| 259.09243 | 78.74  | 17.39 | 17.65 | 17.66 | 18.47 | 1.95E-02 | 8.68E-01 | 8.46E-01 | 1.15E-02 | 1.00E+00 | 1.05E-01 | 1.10E-01 |
| 259.10027 | 24.14  | 15.86 | 13.91 | 10.73 | 15.83 | 3.34E-24 | 3.09E-04 | 6.05E-14 | 1.00E+00 | 2.42E-09 | 9.54E-04 | 7.36E-14 |
| 259.10698 | 272.95 | 14.10 | 18.56 | 17.46 | 17.08 | 3.95E-14 | 1.22E-13 | 7.21E-09 | 9.06E-07 | 1.88E-01 | 4.54E-02 | 9.01E-01 |
| 259.11311 | 281.59 | 19.10 | 23.81 | 19.07 | 22.22 | 3.60E-13 | 1.44E-10 | 1.00E+00 | 5.34E-05 | 2.88E-10 | 1.15E-01 | 6.77E-05 |
| 259.11312 | 89.54  | 26.76 | 26.65 | 26.90 | 26.62 | 1.08E-01 | 8.15E-01 | 6.08E-01 | 6.90E-01 | 1.73E-01 | 9.95E-01 | 1.17E-01 |
| 259.12846 | 287.62 | 21.32 | 20.54 | 20.12 | 20.33 | 7.72E-03 | 1.51E-01 | 6.08E-03 | 4.52E-02 | 6.72E-01 | 9.47E-01 | 9.47E-01 |
| 259.142   | 42.83  | 16.76 | 19.77 | 18.86 | 19.28 | 2.01E-46 | 3.65E-14 | 3.67E-14 | 3.65E-14 | 2.20E-06 | 3.66E-02 | 8.29E-02 |
| 259.15126 | 43.2   | 13.53 | 13.20 | 15.15 | 14.17 | 1.33E-02 | 9.48E-01 | 4.28E-02 | 7.49E-01 | 1.20E-02 | 4.49E-01 | 4.28E-01 |
| 259.16947 | 213.93 | 15.87 | 10.44 | 10.52 | 12.02 | 2.25E-19 | 7.38E-14 | 7.54E-14 | 7.62E-09 | 9.99E-01 | 6.24E-02 | 8.01E-02 |
| 259.17282 | 24.23  | 15.90 | 15.33 | 14.04 | 14.92 | 8.77E-07 | 3.16E-01 | 2.27E-07 | 2.27E-02 | 9.36E-04 | 6.49E-01 | 5.30E-02 |
| 259.19015 | 293.57 | 18.83 | 17.90 | 17.92 | 17.80 | 5.12E-04 | 4.53E-03 | 5.42E-03 | 1.70E-03 | 1.00E+00 | 9.85E-01 | 9.71E-01 |
| 259.20535 | 23.86  | 17.08 | 14.15 | 14.99 | 15.79 | 1.22E-40 | 3.65E-14 | 3.85E-14 | 5.82E-11 | 2.85E-05 | 7.38E-14 | 1.06E-04 |
| 259.20561 | 176.58 | 17.32 | 14.88 | 15.09 | 15.87 | 5.53E-28 | 3.90E-14 | 5.76E-14 | 2.14E-10 | 7.35E-01 | 4.28E-05 | 1.96E-03 |
| 259.24176 | 24.4   | 16.70 | 10.45 | 12.62 | 12.82 | 1.75E-30 | 3.65E-14 | 7.36E-14 | 1.07E-13 | 2.50E-05 | 7.20E-06 | 9.73E-01 |
| 259.28232 | 22.48  | 14.46 | 13.04 | 13.07 | 13.96 | 1.64E-03 | 5.41E-03 | 6.02E-03 | 6.59E-01 | 1.00E+00 | 1.77E-01 | 1.93E-01 |
| 259.34511 | 84.22  | 16.47 | 15.98 | 16.09 | 15.56 | 2.16E-02 | 3.01E-01 | 5.37E-01 | 9.81E-03 | 9.77E-01 | 4.97E-01 | 2.67E-01 |
| 259.56623 | 93.79  | 18.66 | 19.69 | 19.19 | 18.86 | 7.66E-04 | 4.71E-04 | 1.63E-01 | 8.78E-01 | 2.28E-01 | 1.29E-02 | 6.07E-01 |

|           |        |       |       |       |       |          |          |          |          |          |          |          |
|-----------|--------|-------|-------|-------|-------|----------|----------|----------|----------|----------|----------|----------|
| 259.57959 | 94.91  | 15.67 | 17.04 | 17.73 | 16.23 | 2.10E-20 | 5.03E-10 | 7.21E-14 | 3.81E-02 | 5.42E-03 | 9.32E-04 | 8.70E-11 |
| 259.63116 | 27.37  | 16.98 | 20.05 | 19.14 | 19.44 | 9.05E-26 | 4.03E-14 | 1.08E-13 | 7.48E-14 | 3.59E-03 | 1.20E-01 | 6.70E-01 |
| 259.64934 | 29.98  | 16.82 | 19.99 | 19.12 | 19.51 | 1.14E-31 | 3.65E-14 | 7.56E-14 | 5.76E-14 | 2.14E-03 | 2.25E-01 | 3.86E-01 |
| 259.65802 | 38.32  | 16.38 | 17.78 | 18.94 | 17.64 | 7.42E-30 | 3.82E-12 | 3.65E-14 | 1.18E-09 | 2.48E-08 | 8.76E-01 | 8.57E-10 |
| 259.8925  | 47.55  | 20.46 | 19.73 | 20.20 | 19.36 | 6.66E-07 | 1.59E-03 | 5.39E-01 | 8.93E-07 | 9.93E-02 | 2.88E-01 | 4.24E-04 |
| 259.90134 | 38.2   | 14.69 | 13.95 | 14.57 | 14.85 | 1.74E-01 | 2.72E-01 | 9.91E-01 | 9.81E-01 | 4.51E-01 | 1.63E-01 | 9.15E-01 |
| 259.95688 | 94.39  | 19.07 | 24.03 | 24.32 | 22.66 | 5.59E-24 | 7.27E-14 | 6.45E-14 | 1.02E-10 | 9.41E-01 | 4.28E-02 | 7.80E-03 |
| 259.99326 | 58.07  | 18.64 | 15.94 | 16.09 | 16.43 | 1.46E-38 | 3.65E-14 | 3.65E-14 | 4.43E-14 | 8.65E-01 | 6.47E-02 | 3.00E-01 |
| 260.01097 | 103.19 | 14.54 | 13.38 | 11.67 | 13.70 | 3.04E-06 | 1.27E-01 | 7.29E-07 | 4.15E-01 | 1.02E-02 | 9.38E-01 | 1.83E-03 |
| 260.0171  | 89.38  | 15.67 | 14.38 | 16.25 | 15.54 | 1.96E-09 | 1.34E-05 | 1.33E-01 | 9.65E-01 | 4.39E-10 | 3.00E-04 | 6.02E-02 |
| 260.02711 | 88.25  | 17.58 | 17.35 | 16.71 | 17.33 | 1.74E-03 | 7.40E-01 | 8.27E-04 | 6.91E-01 | 3.26E-02 | 1.00E+00 | 5.18E-02 |
| 260.04407 | 93.32  | 20.01 | 17.47 | 18.27 | 18.08 | 3.25E-31 | 3.65E-14 | 7.36E-14 | 7.27E-14 | 2.31E-04 | 1.25E-02 | 7.57E-01 |
| 260.05282 | 253.54 | 15.55 | 17.51 | 17.64 | 17.56 | 2.61E-15 | 4.81E-11 | 1.69E-12 | 5.06E-11 | 9.65E-01 | 9.98E-01 | 9.92E-01 |
| 260.05301 | 47.73  | 18.69 | 17.26 | 17.27 | 17.94 | 1.07E-27 | 4.76E-14 | 4.76E-14 | 1.13E-07 | 1.00E+00 | 3.68E-06 | 4.85E-06 |
| 260.07563 | 69.27  | 17.68 | 19.04 | 18.89 | 18.71 | 6.27E-13 | 1.19E-11 | 9.15E-10 | 5.77E-07 | 8.62E-01 | 3.28E-01 | 7.79E-01 |
| 260.09555 | 24.52  | 11.23 | 13.24 | 10.38 | 16.62 | 4.61E-23 | 1.52E-03 | 3.89E-01 | 7.41E-14 | 3.43E-06 | 9.26E-08 | 6.05E-14 |
| 260.11352 | 284.25 | 19.19 | 20.71 | 17.18 | 19.44 | 1.10E-08 | 1.99E-02 | 7.81E-04 | 9.64E-01 | 1.71E-09 | 1.02E-01 | 2.98E-04 |
| 260.12353 | 53.68  | 15.53 | 14.70 | 16.18 | 14.58 | 2.11E-05 | 8.27E-02 | 2.28E-01 | 4.06E-02 | 2.51E-04 | 9.87E-01 | 9.63E-05 |
| 260.13201 | 277.34 | 18.98 | 16.33 | 16.07 | 16.39 | 3.96E-33 | 4.10E-14 | 3.65E-14 | 5.25E-14 | 6.84E-01 | 9.93E-01 | 5.28E-01 |
| 260.13203 | 153.79 | 19.01 | 15.86 | 16.23 | 16.56 | 9.90E-47 | 3.65E-14 | 3.65E-14 | 3.65E-14 | 2.06E-01 | 1.99E-03 | 3.02E-01 |
| 260.14909 | 208.2  | 16.35 | 9.10  | 11.28 | 12.22 | 2.06E-37 | 3.65E-14 | 5.16E-14 | 7.55E-14 | 3.08E-05 | 3.32E-09 | 1.95E-01 |
| 260.15048 | 28.18  | 16.19 | 17.71 | 16.79 | 17.06 | 2.30E-05 | 5.52E-06 | 1.90E-01 | 2.69E-02 | 1.62E-02 | 1.78E-01 | 8.23E-01 |
| 260.15994 | 47.1   | 17.21 | 17.58 | 17.60 | 16.63 | 6.37E-03 | 5.88E-01 | 5.42E-01 | 2.05E-01 | 1.00E+00 | 1.18E-02 | 9.10E-03 |
| 260.17008 | 48.22  | 17.10 | 18.55 | 18.27 | 18.23 | 9.13E-12 | 4.01E-11 | 8.33E-08 | 6.41E-07 | 5.11E-01 | 4.23E-01 | 9.98E-01 |
| 260.18546 | 26.65  | 21.55 | 21.68 | 22.06 | 21.58 | 1.14E-02 | 8.61E-01 | 1.24E-02 | 9.99E-01 | 1.23E-01 | 9.32E-01 | 3.12E-02 |
| 260.19674 | 59.36  | 18.58 | 19.81 | 19.85 | 19.42 | 8.67E-23 | 7.36E-14 | 7.07E-14 | 1.71E-09 | 9.89E-01 | 1.81E-02 | 6.44E-03 |
| 260.48141 | 68.96  | 16.08 | 18.15 | 18.45 | 17.44 | 1.38E-22 | 7.46E-14 | 6.47E-14 | 6.55E-08 | 5.53E-01 | 1.57E-02 | 1.43E-04 |
| 260.56188 | 226.25 | 13.37 | 15.77 | 16.13 | 15.71 | 1.55E-19 | 2.15E-13 | 7.49E-14 | 1.71E-12 | 6.18E-01 | 9.98E-01 | 5.24E-01 |
| 260.57589 | 260.4  | 11.92 | 13.58 | 15.45 | 13.09 | 6.48E-12 | 1.67E-03 | 7.91E-13 | 5.85E-02 | 3.90E-04 | 7.36E-01 | 7.07E-06 |
| 260.57603 | 157.31 | 16.55 | 13.78 | 14.58 | 14.04 | 8.48E-31 | 3.65E-14 | 7.38E-14 | 4.90E-14 | 1.83E-03 | 6.55E-01 | 8.08E-02 |
| 260.58276 | 70.93  | 18.16 | 17.66 | 17.96 | 17.71 | 4.58E-01 | 4.77E-01 | 9.41E-01 | 5.83E-01 | 8.29E-01 | 9.99E-01 | 8.95E-01 |
| 260.6389  | 29.68  | 16.61 | 20.31 | 19.50 | 19.81 | 1.36E-41 | 3.65E-14 | 3.67E-14 | 3.65E-14 | 4.15E-03 | 1.72E-01 | 5.87E-01 |
| 260.65721 | 27.42  | 16.59 | 20.29 | 19.57 | 19.73 | 2.11E-43 | 3.65E-14 | 3.65E-14 | 3.65E-14 | 9.56E-03 | 8.41E-02 | 9.02E-01 |
| 260.7207  | 282.02 | 15.20 | 18.40 | 19.73 | 17.98 | 6.36E-51 | 3.65E-14 | 3.65E-14 | 3.90E-14 | 1.60E-07 | 2.97E-01 | 1.69E-11 |
| 260.7607  | 44.94  | 22.15 | 21.17 | 21.18 | 20.75 | 1.49E-07 | 2.42E-04 | 2.30E-04 | 1.15E-07 | 1.00E+00 | 3.24E-01 | 3.04E-01 |
| 260.80812 | 46.37  | 16.03 | 16.85 | 16.97 | 16.69 | 2.73E-25 | 7.41E-14 | 4.70E-14 | 1.56E-12 | 4.80E-01 | 2.80E-01 | 8.36E-03 |
| 260.81535 | 60.76  | 16.24 | 16.99 | 16.95 | 16.47 | 9.50E-03 | 2.04E-02 | 3.06E-02 | 8.08E-01 | 9.98E-01 | 2.37E-01 | 3.05E-01 |
| 260.87036 | 101.85 | 12.09 | 13.12 | 10.04 | 14.19 | 1.35E-16 | 8.05E-02 | 1.41E-05 | 2.01E-05 | 1.55E-10 | 8.87E-02 | 7.38E-14 |
| 260.89718 | 47.34  | 17.41 | 17.64 | 17.96 | 17.84 | 7.69E-06 | 1.76E-01 | 5.63E-06 | 1.31E-03 | 2.22E-02 | 3.26E-01 | 6.91E-01 |
| 260.93018 | 48.97  | 14.50 | 14.34 | 15.13 | 15.11 | 6.69E-02 | 9.70E-01 | 2.86E-01 | 3.41E-01 | 1.38E-01 | 1.75E-01 | 1.00E+00 |
| 260.93367 | 32.47  | 14.57 | 13.74 | 15.44 | 14.77 | 1.01E-13 | 1.36E-04 | 4.91E-05 | 7.62E-01 | 8.02E-14 | 5.99E-06 | 5.23E-03 |
| 260.94877 | 48.87  | 15.20 | 17.47 | 17.76 | 17.49 | 1.22E-32 | 4.74E-14 | 3.65E-14 | 5.16E-14 | 4.77E-01 | 9.99E-01 | 5.75E-01 |
| 260.9576  | 88     | 16.70 | 20.80 | 21.21 | 19.88 | 2.07E-35 | 3.67E-14 | 3.65E-14 | 7.37E-14 | 6.02E-01 | 3.69E-02 | 6.41E-04 |
| 260.991   | 62.83  | 19.35 | 19.12 | 20.10 | 19.11 | 1.58E-12 | 3.14E-01 | 4.02E-07 | 2.91E-01 | 1.09E-10 | 1.00E+00 | 1.81E-10 |
| 260.99716 | 86.09  | 15.79 | 15.91 | 16.18 | 16.51 | 1.06E-02 | 9.48E-01 | 2.81E-01 | 8.62E-03 | 6.28E-01 | 5.06E-02 | 4.78E-01 |
| 261.00842 | 89.19  | 15.59 | 13.37 | 15.37 | 16.19 | 2.74E-16 | 1.52E-11 | 8.88E-01 | 2.08E-01 | 2.48E-09 | 7.56E-14 | 4.93E-02 |
| 261.01442 | 97.38  | 19.03 | 19.36 | 18.88 | 18.95 | 7.13E-01 | 8.68E-01 | 9.83E-01 | 9.98E-01 | 6.88E-01 | 8.01E-01 | 9.98E-01 |
| 261.03702 | 282.14 | 20.55 | 22.33 | 22.46 | 21.71 | 1.51E-20 | 7.58E-14 | 7.49E-14 | 1.49E-07 | 9.20E-01 | 1.61E-02 | 1.91E-03 |
| 261.03705 | 85.61  | 15.46 | 16.42 | 16.67 | 15.29 | 2.52E-04 | 3.99E-02 | 4.45E-03 | 9.72E-01 | 9.07E-01 | 1.83E-02 | 1.95E-03 |
| 261.04793 | 80.64  | 17.06 | 14.16 | 14.32 | 15.14 | 4.07E-13 | 1.42E-11 | 1.15E-10 | 1.72E-05 | 9.77E-01 | 8.76E-02 | 1.97E-01 |
| 261.05401 | 237.99 | 16.45 | 18.88 | 19.60 | 18.36 | 3.57E-28 | 7.34E-14 | 3.67E-14 | 9.46E-12 | 2.61E-02 | 1.83E-01 | 1.74E-05 |
| 261.1173  | 95.82  | 20.10 | 20.15 | 20.43 | 19.77 | 9.01E-05 | 9.75E-01 | 5.12E-02 | 8.04E-02 | 1.62E-01 | 3.49E-02 | 1.91E-05 |
| 261.13059 | 150.58 | 16.52 | 14.90 | 15.26 | 15.22 | 6.06E-10 | 1.71E-09 | 2.94E-06 | 3.42E-06 | 4.75E-01 | 5.96E-01 | 9.99E-01 |
| 261.13472 | 28.13  | 15.80 | 19.30 | 19.42 | 15.54 | 4.48E-25 | 8.05E-14 | 7.45E-14 | 9.24E-01 | 9.92E-01 | 7.67E-14 | 7.56E-14 |
| 261.14428 | 46.24  | 20.14 | 20.45 | 20.67 | 20.50 | 5.77E-05 | 2.50E-02 | 1.94E-05 | 1.05E-02 | 2.57E-01 | 9.85E-01 | 4.76E-01 |
| 261.15555 | 79.79  | 16.29 | 17.36 | 17.50 | 17.01 | 1.81E-07 | 1.03E-05 | 3.92E-07 | 8.95E-03 | 9.28E-01 | 4.07E-01 | 1.37E-01 |
| 261.17161 | 26.44  | 17.54 | 18.84 | 18.06 | 18.02 | 2.45E-09 | 2.65E-10 | 2.68E-02 | 6.69E-02 | 4.19E-04 | 2.74E-04 | 9.95E-01 |
| 261.18475 | 182.87 | 16.77 | 13.91 | 14.61 | 14.58 | 2.40E-23 | 5.65E-14 | 9.49E-14 | 1.41E-13 | 4.47E-02 | 7.08E-02 | 1.00E+00 |
| 261.18797 | 25.17  | 18.80 | 18.14 | 18.77 | 18.35 | 1.03E-04 | 4.48E-04 | 9.98E-01 | 3.82E-02 | 1.29E-03 | 6.30E-01 | 7.06E-02 |
| 261.20022 | 56.97  | 15.46 | 15.82 | 15.60 | 15.77 | 1.29E-01 | 1.32E-01 | 8.43E-01 | 2.73E-01 | 5.44E-01 | 9.90E-01 | 7.56E-01 |
| 261.221   | 23.65  | 17.12 | 14.59 | 14.88 | 15.96 | 3.01E-43 | 3.65E-14 | 3.65E-14 | 2.56E-11 | 2.48E-01 | 1.05E-13 | 1.20E-09 |
| 261.22101 | 292.07 | 18.21 | 17.08 | 16.98 | 16.83 | 5.46E-08 | 3.37E-05 | 4.72E-06 | 6.29E-07 | 9.82E-01 | 7.84E-01 | 9.38E-01 |
| 261.3861  | 283.88 | 12.92 | 15.46 | 16.12 | 14.60 | 1.24E-23 | 7.52E-14 | 4.87E-14 | 1.89E-07 | 1.10E-01 | 2.23E-02 | 4.02E-06 |
| 261.49058 | 306.9  | 15.15 | 16.16 | 15.05 | 14.82 | 9.37E-11 | 7.10E-07 | 9.51E-01 | 3.01E-01 | 9.90E-08 | 3.98E-10 | 6.24E-01 |
| 261.51834 | 91.18  | 15.44 | 14.96 | 15.74 | 15.52 | 2.56E-02 | 2.15E-01 | 6.46E-01 | 9.89E-01 | 1.46E-02 | 1.45E-01 | 8.55E-01 |
| 261.53544 | 231.4  | 16.04 | 17.41 | 18.90 | 16.95 | 1.04E-14 | 1.88E-04 | 7.63E-14 | 3.38E-02 | 7.14E-05 | 5.27E-01 | 1.89E-07 |
| 261.55577 | 229.53 | 13.08 | 15.79 | 16.10 | 15.32 | 5.23E-26 | 7.38E-14 | 4.59E-14 | 1.75E-13 | 6.49E-01 | 3.35E-01 | 2.56E-02 |
| 261.88932 | 46.38  | 19.43 | 18.32 | 18.80 | 17.98 | 8.16E-11 | 4.93E-07 | 8.46E-03 | 1.36E-10 | 9.68E-02 | 3.84E-01 | 8.21E-04 |

|           |        |       |       |       |       |          |          |          |          |          |          |          |
|-----------|--------|-------|-------|-------|-------|----------|----------|----------|----------|----------|----------|----------|
| 261.91003 | 268.18 | 19.35 | 14.01 | 13.78 | 15.46 | 1.22E-23 | 7.34E-14 | 7.03E-14 | 7.64E-11 | 9.75E-01 | 5.07E-02 | 1.51E-02 |
| 261.92806 | 61.19  | 17.20 | 15.41 | 17.24 | 15.75 | 1.78E-14 | 1.83E-10 | 9.99E-01 | 5.55E-07 | 2.12E-10 | 5.92E-01 | 5.21E-07 |
| 261.94537 | 297.32 | 14.63 | 16.12 | 14.62 | 13.66 | 1.21E-06 | 1.85E-03 | 1.00E+00 | 1.03E-01 | 2.39E-03 | 2.70E-07 | 1.20E-01 |
| 261.94564 | 100.79 | 19.14 | 22.16 | 21.61 | 21.04 | 3.10E-25 | 4.23E-14 | 7.42E-14 | 6.93E-11 | 1.65E-01 | 3.48E-04 | 1.55E-01 |
| 261.95417 | 88.87  | 15.90 | 21.03 | 21.34 | 19.94 | 6.60E-31 | 4.05E-14 | 3.67E-14 | 7.46E-14 | 9.04E-01 | 8.20E-02 | 1.25E-02 |
| 261.96125 | 79.5   | 16.28 | 17.63 | 17.94 | 17.05 | 5.70E-13 | 1.14E-08 | 1.37E-12 | 3.44E-03 | 4.73E-01 | 5.50E-02 | 5.36E-04 |
| 261.97252 | 94.53  | 16.85 | 21.02 | 21.54 | 20.12 | 7.24E-42 | 3.65E-14 | 3.65E-14 | 6.16E-14 | 3.06E-01 | 1.95E-02 | 3.36E-05 |
| 262.04007 | 297.51 | 15.57 | 17.60 | 17.70 | 16.55 | 1.25E-18 | 8.65E-14 | 7.43E-14 | 4.44E-04 | 9.77E-01 | 2.44E-04 | 3.95E-05 |
| 262.05235 | 85.69  | 16.17 | 16.77 | 16.69 | 16.98 | 1.37E-02 | 8.36E-02 | 1.57E-01 | 1.00E-02 | 9.91E-01 | 8.53E-01 | 6.90E-01 |
| 262.08558 | 227.22 | 14.12 | 17.05 | 17.28 | 16.61 | 2.20E-43 | 3.65E-14 | 3.65E-14 | 3.72E-14 | 6.57E-01 | 1.65E-01 | 8.12E-03 |
| 262.09084 | 48.99  | 16.01 | 14.29 | 15.54 | 15.43 | 2.02E-04 | 7.09E-05 | 5.97E-01 | 4.47E-01 | 9.53E-03 | 2.92E-02 | 9.93E-01 |
| 262.10307 | 94.64  | 19.16 | 20.21 | 20.39 | 20.51 | 5.39E-16 | 2.11E-09 | 2.53E-12 | 1.80E-13 | 7.23E-01 | 2.96E-01 | 8.75E-01 |
| 262.11101 | 27.36  | 13.72 | 14.75 | 13.46 | 16.54 | 1.68E-06 | 2.71E-01 | 9.68E-01 | 1.61E-05 | 1.24E-01 | 1.80E-02 | 3.64E-06 |
| 262.12846 | 119.88 | 15.80 | 16.20 | 15.06 | 17.00 | 4.83E-10 | 3.96E-01 | 2.45E-02 | 6.08E-05 | 1.55E-04 | 2.19E-02 | 1.00E-10 |
| 262.13801 | 27.44  | 15.59 | 14.67 | 15.12 | 11.86 | 2.26E-11 | 2.51E-01 | 7.77E-01 | 3.34E-11 | 8.10E-01 | 1.57E-06 | 1.43E-08 |
| 262.13943 | 289.67 | 17.53 | 15.49 | 15.68 | 15.90 | 1.09E-20 | 7.57E-14 | 7.63E-14 | 5.40E-12 | 8.04E-01 | 2.49E-01 | 7.52E-01 |
| 262.14358 | 166.27 | 17.51 | 15.26 | 14.51 | 15.60 | 4.78E-38 | 4.10E-14 | 3.65E-14 | 7.41E-14 | 8.60E-04 | 3.42E-01 | 8.10E-07 |
| 262.14967 | 59.01  | 15.32 | 18.42 | 18.17 | 18.53 | 2.83E-18 | 1.08E-13 | 1.56E-12 | 9.55E-14 | 9.12E-01 | 9.91E-01 | 7.83E-01 |
| 262.16472 | 46.38  | 22.60 | 23.21 | 23.24 | 22.69 | 5.77E-14 | 1.98E-09 | 1.66E-10 | 7.30E-01 | 9.84E-01 | 2.50E-06 | 3.62E-07 |
| 262.18014 | 208.14 | 15.51 | 11.30 | 11.91 | 13.13 | 6.45E-14 | 4.87E-13 | 2.84E-10 | 9.76E-05 | 6.79E-01 | 6.36E-03 | 1.19E-01 |
| 262.53465 | 89.42  | 13.88 | 14.58 | 14.21 | 14.65 | 3.41E-01 | 4.36E-01 | 8.94E-01 | 3.77E-01 | 8.61E-01 | 9.99E-01 | 8.04E-01 |
| 262.55152 | 74.61  | 17.68 | 16.73 | 16.96 | 16.75 | 9.40E-05 | 3.12E-04 | 9.13E-03 | 6.15E-04 | 7.79E-01 | 1.00E+00 | 8.26E-01 |
| 262.56504 | 88.79  | 14.65 | 15.53 | 15.78 | 14.75 | 1.61E-04 | 1.56E-02 | 7.35E-04 | 9.89E-01 | 8.37E-01 | 5.78E-02 | 4.88E-03 |
| 262.62251 | 31.87  | 15.90 | 17.62 | 17.83 | 17.46 | 1.79E-22 | 7.29E-14 | 7.16E-14 | 2.82E-13 | 7.02E-01 | 8.54E-01 | 2.47E-01 |
| 262.63489 | 26.99  | 15.96 | 15.44 | 16.69 | 15.66 | 1.64E-02 | 5.64E-01 | 2.45E-01 | 8.80E-01 | 1.26E-02 | 9.57E-01 | 6.49E-02 |
| 262.75797 | 44.88  | 22.43 | 21.45 | 21.44 | 21.06 | 6.15E-07 | 4.23E-04 | 3.15E-04 | 6.04E-07 | 1.00E+00 | 4.27E-01 | 4.40E-01 |
| 262.90681 | 112.47 | 13.49 | 14.28 | 11.64 | 14.33 | 1.15E-06 | 4.28E-01 | 2.10E-03 | 3.92E-01 | 7.62E-06 | 1.00E+00 | 8.52E-06 |
| 262.94581 | 48.98  | 15.14 | 15.00 | 15.08 | 15.65 | 4.14E-02 | 9.25E-01 | 9.95E-01 | 1.38E-01 | 9.83E-01 | 3.93E-02 | 9.12E-02 |
| 262.97321 | 92.97  | 15.71 | 17.37 | 17.70 | 16.37 | 4.90E-16 | 1.33E-10 | 8.90E-14 | 3.20E-02 | 5.18E-01 | 5.18E-04 | 1.22E-06 |
| 263.00248 | 56.89  | 17.47 | 13.44 | 16.22 | 13.41 | 1.99E-19 | 7.74E-14 | 3.28E-02 | 8.36E-14 | 8.90E-08 | 1.00E+00 | 1.29E-07 |
| 263.01512 | 254.31 | 15.73 | 16.49 | 19.31 | 17.00 | 5.84E-21 | 1.11E-01 | 6.58E-14 | 1.61E-03 | 2.03E-13 | 4.75E-01 | 2.61E-09 |
| 263.02365 | 79.73  | 15.41 | 17.69 | 18.16 | 17.18 | 8.75E-20 | 1.77E-13 | 7.44E-14 | 1.44E-08 | 3.30E-01 | 3.10E-01 | 4.46E-03 |
| 263.03092 | 168.63 | 15.16 | 15.43 | 14.79 | 15.41 | 1.61E-01 | 8.10E-01 | 6.24E-01 | 8.53E-01 | 1.78E-01 | 1.00E+00 | 2.21E-01 |
| 263.03385 | 27.85  | 15.13 | 14.61 | 14.10 | 16.64 | 8.36E-09 | 5.20E-01 | 3.04E-02 | 6.69E-04 | 5.35E-01 | 4.42E-06 | 4.12E-09 |
| 263.0409  | 304.25 | 13.34 | 14.58 | 14.63 | 13.90 | 1.14E-05 | 1.29E-04 | 5.16E-05 | 2.27E-01 | 9.98E-01 | 1.14E-01 | 7.46E-02 |
| 263.06063 | 107.2  | 17.33 | 18.10 | 18.02 | 17.72 | 3.24E-03 | 4.25E-03 | 1.24E-02 | 3.36E-01 | 9.85E-01 | 3.86E-01 | 5.89E-01 |
| 263.07287 | 53.13  | 18.90 | 18.81 | 18.70 | 18.40 | 1.63E-04 | 8.56E-01 | 2.71E-01 | 8.42E-05 | 7.65E-01 | 2.65E-03 | 4.48E-02 |
| 263.07524 | 145.7  | 10.12 | 14.33 | 12.37 | 13.29 | 5.18E-19 | 7.34E-14 | 8.50E-07 | 1.75E-11 | 4.67E-05 | 9.10E-02 | 1.57E-01 |
| 263.08717 | 81.5   | 17.86 | 18.73 | 19.06 | 18.64 | 4.67E-11 | 1.66E-06 | 2.34E-11 | 3.61E-05 | 2.19E-01 | 9.56E-01 | 7.99E-02 |
| 263.09521 | 24.61  | 15.54 | 15.28 | 13.84 | 16.98 | 3.54E-19 | 7.83E-01 | 3.07E-08 | 9.53E-06 | 8.14E-06 | 2.68E-07 | 6.92E-14 |
| 263.10675 | 88.28  | 14.71 | 16.32 | 15.65 | 16.25 | 3.56E-04 | 7.00E-04 | 9.94E-02 | 1.82E-03 | 3.88E-01 | 9.99E-01 | 5.04E-01 |
| 263.12408 | 153.56 | 13.02 | 13.80 | 14.28 | 13.73 | 9.19E-03 | 1.58E-01 | 3.86E-03 | 2.50E-01 | 5.77E-01 | 9.98E-01 | 4.82E-01 |
| 263.13172 | 34.24  | 15.82 | 17.19 | 17.13 | 17.23 | 6.43E-05 | 6.40E-04 | 1.00E-03 | 5.91E-04 | 9.99E-01 | 9.99E-01 | 9.93E-01 |
| 263.1461  | 56.97  | 17.04 | 17.36 | 17.10 | 17.75 | 7.15E-02 | 6.53E-01 | 9.96E-01 | 6.81E-02 | 7.93E-01 | 5.67E-01 | 1.25E-01 |
| 263.16424 | 22.8   | 16.77 | 13.97 | 14.15 | 14.47 | 9.43E-27 | 5.07E-14 | 6.69E-14 | 7.38E-14 | 8.96E-01 | 2.25E-01 | 6.00E-01 |
| 263.16436 | 178.86 | 17.15 | 14.67 | 14.71 | 15.36 | 2.83E-35 | 3.65E-14 | 3.65E-14 | 7.58E-14 | 9.95E-01 | 2.25E-03 | 4.47E-03 |
| 263.16814 | 30.51  | 19.45 | 19.81 | 19.88 | 19.22 | 8.53E-08 | 1.10E-02 | 1.16E-03 | 2.14E-01 | 9.29E-01 | 1.53E-05 | 7.58E-07 |
| 263.20016 | 24.46  | 20.14 | 18.40 | 19.22 | 20.06 | 1.04E-13 | 2.16E-12 | 2.83E-04 | 9.84E-01 | 2.62E-03 | 2.26E-10 | 2.57E-03 |
| 263.20044 | 152.5  | 18.01 | 16.48 | 16.49 | 17.14 | 3.53E-20 | 7.45E-14 | 7.37E-14 | 3.09E-06 | 1.00E+00 | 7.64E-04 | 1.09E-03 |
| 263.23279 | 26.83  | 15.53 | 17.42 | 16.95 | 16.05 | 5.65E-10 | 2.08E-09 | 6.37E-06 | 2.81E-01 | 4.00E-01 | 9.20E-05 | 1.65E-02 |
| 263.23668 | 278.12 | 21.57 | 21.03 | 20.80 | 20.91 | 1.14E-01 | 3.87E-01 | 1.08E-01 | 2.33E-01 | 9.16E-01 | 9.87E-01 | 9.91E-01 |
| 263.23674 | 153.66 | 20.89 | 19.47 | 19.17 | 19.42 | 6.16E-06 | 5.49E-04 | 1.43E-05 | 4.79E-04 | 8.53E-01 | 9.99E-01 | 9.16E-01 |
| 263.52417 | 252.96 | 13.84 | 14.60 | 15.41 | 14.27 | 4.12E-07 | 2.98E-02 | 1.13E-07 | 4.28E-01 | 1.95E-02 | 6.56E-01 | 4.58E-04 |
| 263.52471 | 83.4   | 11.91 | 15.25 | 15.65 | 14.46 | 7.02E-23 | 7.38E-14 | 6.72E-14 | 1.36E-10 | 6.94E-01 | 1.54E-01 | 8.76E-03 |
| 263.54151 | 150.65 | 14.60 | 15.01 | 15.03 | 13.67 | 7.55E-02 | 8.79E-01 | 8.65E-01 | 3.43E-01 | 1.00E+00 | 9.68E-02 | 8.72E-02 |
| 263.55441 | 71.35  | 16.83 | 15.39 | 15.77 | 15.34 | 3.47E-04 | 1.19E-03 | 2.81E-02 | 1.15E-03 | 7.65E-01 | 1.00E+00 | 7.19E-01 |
| 263.68277 | 22.59  | 13.62 | 14.87 | 13.35 | 14.60 | 9.50E-04 | 1.88E-02 | 9.12E-01 | 1.10E-01 | 3.03E-03 | 9.37E-01 | 2.56E-02 |
| 263.88829 | 37.76  | 16.51 | 14.38 | 14.78 | 14.41 | 2.98E-05 | 1.44E-04 | 2.69E-03 | 2.77E-04 | 8.63E-01 | 1.00E+00 | 8.92E-01 |
| 263.94199 | 110.87 | 15.96 | 16.69 | 16.03 | 16.12 | 1.61E-01 | 1.52E-01 | 9.97E-01 | 9.69E-01 | 2.49E-01 | 4.05E-01 | 9.95E-01 |
| 263.95616 | 303.03 | 13.77 | 12.39 | 10.76 | 14.98 | 1.92E-14 | 2.16E-02 | 6.96E-09 | 6.87E-02 | 5.70E-03 | 3.95E-06 | 1.07E-13 |
| 263.97031 | 92.72  | 15.44 | 17.58 | 18.09 | 16.62 | 2.04E-23 | 7.54E-14 | 5.50E-14 | 1.76E-05 | 1.71E-01 | 1.12E-03 | 1.19E-07 |
| 263.97855 | 85.47  | 15.75 | 20.51 | 20.59 | 19.21 | 1.64E-57 | 3.65E-14 | 3.65E-14 | 3.65E-14 | 9.89E-01 | 5.56E-06 | 1.01E-06 |
| 264.02184 | 141.13 | 13.69 | 15.63 | 14.81 | 13.73 | 1.09E-04 | 3.01E-04 | 7.78E-02 | 1.00E+00 | 3.27E-01 | 1.01E-03 | 1.29E-01 |
| 264.03423 | 272    | 21.07 | 22.32 | 21.77 | 20.73 | 1.30E-08 | 7.32E-06 | 2.52E-02 | 5.62E-01 | 1.49E-01 | 5.51E-08 | 5.99E-04 |
| 264.03934 | 270.4  | 18.44 | 21.61 | 20.35 | 19.59 | 2.09E-22 | 4.85E-14 | 2.57E-10 | 4.67E-04 | 9.67E-05 | 4.09E-10 | 4.59E-02 |
| 264.07663 | 129.8  | 16.71 | 17.01 | 17.21 | 15.43 | 4.84E-07 | 7.56E-01 | 3.64E-01 | 4.30E-04 | 9.28E-01 | 1.40E-05 | 6.75E-07 |
| 264.09011 | 57.23  | 14.62 | 15.15 | 16.84 | 15.84 | 3.60E-09 | 3.92E-01 | 1.79E-09 | 3.24E-03 | 1.43E-05 | 2.35E-01 | 2.71E-02 |
| 264.10126 | 58.23  | 15.26 | 14.17 | 14.19 | 14.76 | 2.58E-03 | 6.08E-03 | 6.78E-03 | 4.44E-01 | 1.00E+00 | 3.40E-01 | 3.65E-01 |

|           |        |       |       |       |       |          |          |          |          |          |          |          |
|-----------|--------|-------|-------|-------|-------|----------|----------|----------|----------|----------|----------|----------|
| 264.10755 | 103.35 | 16.53 | 14.96 | 14.63 | 15.46 | 1.16E-25 | 7.45E-14 | 4.05E-14 | 4.12E-09 | 2.04E-01 | 1.95E-02 | 1.24E-05 |
| 264.11697 | 292.03 | 18.74 | 17.03 | 17.05 | 17.07 | 1.46E-13 | 1.59E-10 | 1.62E-10 | 1.08E-09 | 1.00E+00 | 9.99E-01 | 1.00E+00 |
| 264.12678 | 24.67  | 13.61 | 16.78 | 14.25 | 17.15 | 7.27E-17 | 2.87E-11 | 4.37E-01 | 6.66E-13 | 2.46E-07 | 8.57E-01 | 7.37E-09 |
| 264.15943 | 204.9  | 16.08 | 11.91 | 12.99 | 12.86 | 3.86E-16 | 7.39E-14 | 1.34E-09 | 1.11E-09 | 1.18E-01 | 2.31E-01 | 9.94E-01 |
| 264.19582 | 151.45 | 17.58 | 15.62 | 15.78 | 16.39 | 3.25E-26 | 4.67E-14 | 6.76E-14 | 5.63E-10 | 8.00E-01 | 1.85E-04 | 4.45E-03 |
| 264.2036  | 24.51  | 17.55 | 14.14 | 15.81 | 17.13 | 3.83E-15 | 9.18E-14 | 1.07E-04 | 7.35E-01 | 3.70E-04 | 1.37E-10 | 1.06E-02 |
| 264.23997 | 23.52  | 18.42 | 16.91 | 16.85 | 17.80 | 7.04E-17 | 5.41E-13 | 1.04E-13 | 8.44E-03 | 9.86E-01 | 8.53E-05 | 1.66E-05 |
| 264.24008 | 289.42 | 19.01 | 17.18 | 17.26 | 16.84 | 8.27E-15 | 3.30E-10 | 1.27E-09 | 4.78E-13 | 9.91E-01 | 5.98E-01 | 4.15E-01 |
| 264.24028 | 172.02 | 18.70 | 16.92 | 16.65 | 17.49 | 5.66E-18 | 4.10E-13 | 7.57E-14 | 1.43E-06 | 6.39E-01 | 7.63E-02 | 2.27E-03 |
| 264.5359  | 264.68 | 18.44 | 19.07 | 18.53 | 17.75 | 1.21E-05 | 3.89E-02 | 9.79E-01 | 2.80E-02 | 1.17E-01 | 2.11E-06 | 1.12E-02 |
| 264.57398 | 84.31  | 15.05 | 15.18 | 15.35 | 15.97 | 4.56E-03 | 9.52E-01 | 6.22E-01 | 2.99E-03 | 9.14E-01 | 2.08E-02 | 1.03E-01 |
| 264.57763 | 137.26 | 15.53 | 14.15 | 14.06 | 13.16 | 6.54E-10 | 2.11E-04 | 5.59E-05 | 1.49E-10 | 9.93E-01 | 2.55E-02 | 4.87E-02 |
| 264.75514 | 45     | 21.29 | 20.27 | 20.24 | 19.79 | 9.36E-09 | 8.25E-05 | 3.89E-05 | 7.44E-09 | 9.99E-01 | 2.09E-01 | 2.55E-01 |
| 264.84435 | 45.91  | 21.31 | 22.79 | 22.88 | 22.58 | 4.44E-35 | 3.67E-14 | 3.65E-14 | 6.61E-14 | 8.70E-01 | 3.18E-01 | 6.64E-02 |
| 264.85233 | 48.64  | 16.94 | 17.35 | 17.23 | 17.70 | 7.42E-02 | 4.62E-01 | 7.27E-01 | 4.22E-02 | 9.74E-01 | 6.33E-01 | 3.73E-01 |
| 264.94304 | 300.96 | 16.48 | 15.90 | 14.90 | 16.30 | 2.13E-06 | 2.23E-01 | 2.04E-06 | 9.42E-01 | 8.22E-03 | 5.87E-01 | 9.59E-05 |
| 264.96247 | 87.47  | 14.77 | 16.22 | 16.11 | 15.56 | 6.05E-07 | 2.28E-06 | 1.26E-05 | 3.02E-02 | 9.78E-01 | 1.12E-01 | 2.39E-01 |
| 264.97969 | 88.6   | 14.76 | 16.81 | 16.31 | 15.79 | 1.35E-16 | 7.47E-14 | 1.38E-10 | 5.86E-05 | 1.33E-01 | 1.41E-04 | 1.19E-01 |
| 264.99913 | 42.19  | 15.62 | 15.18 | 15.31 | 15.51 | 5.26E-01 | 5.10E-01 | 7.56E-01 | 9.88E-01 | 9.79E-01 | 7.56E-01 | 9.29E-01 |
| 265.02272 | 80.07  | 21.20 | 17.24 | 19.15 | 19.08 | 2.49E-37 | 3.65E-14 | 8.56E-14 | 8.56E-14 | 1.97E-12 | 5.14E-11 | 9.91E-01 |
| 265.03439 | 45.59  | 17.68 | 17.18 | 17.90 | 17.76 | 1.80E-02 | 1.35E-01 | 7.61E-01 | 9.84E-01 | 1.29E-02 | 8.07E-02 | 9.39E-01 |
| 265.03513 | 255.64 | 15.73 | 15.45 | 14.83 | 14.44 | 1.21E-05 | 7.23E-01 | 3.82E-03 | 2.30E-05 | 9.91E-02 | 2.18E-03 | 5.12E-01 |
| 265.04283 | 257.95 | 14.79 | 15.82 | 15.13 | 14.14 | 9.11E-09 | 1.90E-04 | 4.92E-01 | 4.19E-02 | 3.04E-02 | 2.02E-09 | 6.54E-04 |
| 265.05954 | 61.86  | 15.79 | 15.28 | 15.53 | 15.30 | 5.24E-01 | 5.48E-01 | 8.99E-01 | 5.98E-01 | 9.25E-01 | 1.00E+00 | 9.43E-01 |
| 265.06776 | 86.56  | 16.38 | 19.31 | 19.37 | 18.35 | 4.75E-52 | 3.65E-14 | 3.65E-14 | 4.10E-14 | 9.86E-01 | 4.42E-07 | 6.21E-08 |
| 265.07906 | 91.71  | 17.08 | 18.14 | 17.93 | 18.12 | 1.90E-08 | 3.21E-07 | 4.98E-05 | 9.09E-07 | 6.97E-01 | 1.00E+00 | 7.50E-01 |
| 265.11167 | 48.24  | 20.71 | 20.12 | 19.97 | 20.67 | 4.17E-11 | 6.72E-06 | 7.65E-09 | 9.82E-01 | 6.00E-01 | 1.13E-04 | 3.47E-07 |
| 265.14327 | 211.89 | 16.49 | 12.33 | 13.77 | 13.14 | 1.55E-20 | 7.11E-14 | 5.03E-10 | 2.95E-13 | 3.25E-03 | 2.29E-01 | 4.49E-01 |
| 265.15442 | 27.1   | 16.54 | 15.73 | 16.67 | 16.34 | 8.82E-02 | 1.49E-01 | 9.87E-01 | 9.57E-01 | 8.02E-02 | 4.32E-01 | 8.47E-01 |
| 265.17955 | 291.01 | 17.69 | 16.83 | 16.87 | 16.77 | 3.22E-06 | 8.60E-05 | 1.68E-04 | 3.74E-05 | 9.97E-01 | 9.91E-01 | 9.61E-01 |
| 265.21596 | 288.57 | 18.25 | 16.87 | 16.87 | 16.81 | 5.09E-10 | 1.73E-07 | 1.25E-07 | 9.35E-08 | 1.00E+00 | 9.94E-01 | 9.94E-01 |
| 265.25224 | 23.86  | 20.35 | 19.42 | 19.02 | 20.02 | 7.15E-14 | 4.68E-07 | 3.41E-13 | 2.23E-01 | 8.39E-02 | 4.61E-03 | 1.87E-07 |
| 265.25234 | 277.83 | 21.03 | 20.97 | 20.75 | 21.22 | 6.15E-01 | 9.98E-01 | 8.33E-01 | 9.45E-01 | 9.17E-01 | 8.95E-01 | 5.39E-01 |
| 265.48255 | 111.57 | 16.43 | 11.63 | 15.03 | 11.90 | 3.31E-13 | 7.78E-11 | 1.56E-01 | 2.17E-09 | 9.06E-06 | 9.81E-01 | 8.50E-05 |
| 265.56147 | 72.01  | 18.90 | 20.05 | 20.13 | 19.82 | 1.34E-06 | 2.75E-05 | 5.10E-06 | 1.79E-03 | 9.89E-01 | 8.11E-01 | 6.26E-01 |
| 265.56886 | 100.56 | 15.03 | 15.08 | 14.65 | 14.77 | 4.56E-01 | 9.97E-01 | 5.96E-01 | 8.41E-01 | 5.03E-01 | 7.58E-01 | 9.83E-01 |
| 265.57499 | 90.51  | 15.53 | 14.98 | 15.44 | 14.39 | 3.20E-03 | 3.31E-01 | 9.93E-01 | 3.61E-03 | 5.05E-01 | 2.98E-01 | 1.06E-02 |
| 265.61984 | 29.65  | 17.67 | 13.01 | 13.42 | 13.77 | 9.82E-86 | 3.65E-14 | 3.65E-14 | 3.65E-14 | 5.78E-02 | 5.37E-05 | 1.53E-01 |
| 265.63121 | 27.53  | 16.13 | 18.18 | 17.46 | 17.87 | 4.47E-24 | 5.14E-14 | 1.75E-11 | 7.43E-14 | 8.96E-04 | 3.61E-01 | 1.55E-01 |
| 265.84778 | 46.14  | 15.96 | 16.59 | 16.77 | 16.56 | 2.55E-11 | 3.32E-07 | 4.44E-11 | 3.23E-06 | 4.34E-01 | 9.90E-01 | 2.84E-01 |
| 265.9747  | 73.73  | 16.11 | 16.89 | 17.15 | 16.24 | 9.53E-04 | 4.08E-02 | 2.15E-03 | 9.73E-01 | 8.12E-01 | 1.56E-01 | 1.66E-02 |
| 266.02637 | 82.67  | 17.52 | 11.91 | 12.68 | 13.26 | 9.97E-38 | 3.65E-14 | 3.65E-14 | 5.74E-14 | 1.90E-01 | 4.57E-03 | 4.60E-01 |
| 266.03074 | 248.89 | 16.16 | 16.15 | 17.05 | 16.07 | 4.35E-06 | 1.00E+00 | 7.86E-05 | 9.75E-01 | 1.27E-04 | 9.82E-01 | 3.93E-05 |
| 266.04256 | 234.3  | 10.34 | 15.04 | 14.35 | 13.48 | 1.35E-17 | 7.29E-14 | 8.09E-13 | 5.20E-08 | 5.54E-01 | 2.31E-02 | 3.73E-01 |
| 266.0537  | 42.83  | 17.58 | 17.12 | 16.47 | 16.68 | 4.92E-04 | 3.50E-01 | 4.52E-04 | 9.34E-03 | 1.07E-01 | 4.33E-01 | 8.98E-01 |
| 266.06344 | 65.5   | 16.14 | 15.98 | 16.52 | 16.24 | 4.41E-01 | 9.63E-01 | 6.40E-01 | 9.91E-01 | 3.75E-01 | 8.81E-01 | 8.43E-01 |
| 266.07466 | 48.26  | 22.22 | 21.16 | 21.58 | 21.62 | 2.20E-10 | 2.99E-11 | 7.88E-05 | 3.79E-04 | 2.63E-02 | 1.81E-02 | 9.96E-01 |
| 266.11495 | 48.21  | 17.40 | 16.04 | 15.77 | 16.94 | 1.04E-14 | 1.79E-09 | 4.96E-13 | 1.32E-01 | 5.69E-01 | 3.10E-04 | 9.49E-07 |
| 266.12318 | 86.67  | 19.92 | 19.75 | 19.82 | 19.74 | 4.19E-01 | 4.91E-01 | 8.27E-01 | 4.46E-01 | 9.46E-01 | 1.00E+00 | 9.16E-01 |
| 266.13282 | 171.11 | 18.21 | 14.62 | 14.74 | 15.52 | 2.43E-51 | 3.65E-14 | 3.65E-14 | 3.65E-14 | 9.35E-01 | 1.45E-04 | 1.20E-03 |
| 266.13858 | 33.55  | 19.00 | 19.61 | 18.88 | 18.14 | 4.73E-10 | 8.65E-03 | 9.26E-01 | 1.15E-04 | 1.45E-03 | 4.21E-11 | 1.64E-03 |
| 266.15985 | 56.28  | 17.17 | 16.25 | 16.50 | 16.70 | 5.67E-07 | 2.64E-07 | 2.37E-04 | 2.47E-02 | 4.48E-01 | 4.92E-02 | 6.48E-01 |
| 266.17491 | 211.73 | 16.00 | 10.80 | 11.63 | 11.98 | 3.12E-19 | 7.49E-14 | 2.40E-13 | 4.90E-11 | 4.49E-01 | 1.71E-01 | 9.23E-01 |
| 266.25563 | 23.41  | 18.08 | 16.03 | 15.84 | 17.25 | 7.24E-26 | 7.29E-14 | 5.43E-14 | 5.45E-04 | 7.90E-01 | 2.46E-07 | 1.45E-09 |
| 266.25572 | 290.09 | 18.62 | 17.13 | 16.92 | 17.23 | 6.75E-10 | 4.24E-07 | 5.27E-09 | 4.81E-06 | 8.76E-01 | 9.86E-01 | 7.01E-01 |
| 266.48378 | 304.52 | 14.84 | 15.85 | 15.11 | 13.32 | 6.93E-15 | 1.30E-03 | 7.43E-01 | 5.12E-07 | 3.94E-02 | 7.66E-14 | 6.52E-09 |
| 266.56307 | 66.21  | 17.88 | 17.74 | 18.59 | 17.74 | 6.49E-02 | 9.81E-01 | 1.82E-01 | 9.80E-01 | 9.41E-02 | 1.00E+00 | 1.03E-01 |
| 266.62767 | 30.2   | 17.85 | 13.85 | 14.16 | 14.41 | 8.21E-88 | 3.65E-14 | 3.65E-14 | 3.65E-14 | 9.88E-02 | 4.80E-04 | 2.81E-01 |
| 266.63905 | 31.02  | 19.48 | 23.49 | 22.65 | 23.13 | 8.46E-64 | 3.65E-14 | 3.65E-14 | 3.65E-14 | 4.86E-05 | 2.38E-01 | 5.47E-02 |
| 266.7527  | 45.05  | 19.30 | 17.87 | 17.84 | 17.71 | 3.12E-15 | 9.89E-11 | 2.38E-11 | 2.70E-12 | 9.98E-01 | 8.73E-01 | 9.31E-01 |
| 266.84179 | 46.05  | 20.25 | 21.74 | 21.87 | 21.53 | 1.41E-36 | 3.65E-14 | 3.65E-14 | 6.01E-14 | 7.15E-01 | 3.07E-01 | 2.94E-02 |
| 266.84927 | 48.61  | 15.81 | 17.62 | 17.62 | 17.50 | 4.06E-08 | 1.78E-06 | 1.28E-06 | 1.65E-05 | 1.00E+00 | 9.88E-01 | 9.85E-01 |
| 266.88877 | 262.27 | 18.44 | 12.34 | 11.87 | 13.73 | 5.53E-23 | 7.41E-14 | 6.78E-14 | 3.28E-11 | 8.85E-01 | 1.62E-01 | 2.71E-02 |
| 266.89381 | 48.25  | 16.03 | 16.20 | 16.54 | 16.17 | 9.44E-02 | 8.33E-01 | 6.19E-02 | 9.17E-01 | 3.82E-01 | 9.98E-01 | 3.10E-01 |
| 266.90836 | 42.88  | 16.69 | 17.17 | 16.63 | 17.90 | 1.54E-13 | 1.48E-02 | 9.79E-01 | 1.49E-11 | 5.57E-03 | 1.27E-04 | 4.37E-12 |
| 266.92853 | 30.14  | 18.54 | 18.63 | 19.38 | 19.10 | 2.11E-06 | 9.61E-01 | 8.76E-06 | 8.19E-03 | 1.46E-04 | 4.28E-02 | 4.21E-01 |
| 266.9671  | 285.2  | 10.70 | 14.72 | 15.06 | 14.65 | 8.10E-11 | 6.73E-08 | 3.06E-09 | 2.44E-07 | 9.60E-01 | 1.00E+00 | 9.38E-01 |
| 266.96876 | 164.64 | 13.55 | 15.47 | 14.73 | 14.08 | 3.79E-04 | 2.11E-04 | 4.54E-02 | 6.59E-01 | 3.93E-01 | 2.33E-02 | 5.30E-01 |

|           |        |       |       |       |       |          |          |          |          |          |          |          |
|-----------|--------|-------|-------|-------|-------|----------|----------|----------|----------|----------|----------|----------|
| 266.99268 | 36.67  | 14.34 | 11.04 | 15.40 | 12.58 | 2.07E-27 | 7.61E-14 | 1.16E-02 | 8.39E-06 | 3.74E-14 | 2.34E-04 | 1.79E-12 |
| 267.0225  | 88.02  | 14.38 | 16.20 | 17.29 | 16.21 | 1.99E-10 | 6.47E-05 | 3.57E-11 | 9.05E-05 | 4.33E-02 | 1.00E+00 | 5.62E-02 |
| 267.04118 | 92.6   | 15.35 | 20.15 | 19.31 | 19.10 | 4.60E-38 | 3.65E-14 | 3.67E-14 | 4.56E-14 | 4.88E-02 | 1.08E-02 | 9.26E-01 |
| 267.05399 | 230.66 | 15.48 | 19.57 | 20.22 | 17.93 | 1.35E-22 | 7.33E-14 | 6.58E-14 | 1.30E-06 | 4.78E-01 | 3.42E-03 | 1.07E-05 |
| 267.06626 | 87.85  | 17.14 | 15.78 | 16.12 | 15.95 | 1.99E-11 | 1.47E-10 | 1.55E-06 | 4.71E-08 | 3.11E-01 | 8.42E-01 | 8.29E-01 |
| 267.07794 | 48.71  | 18.70 | 16.90 | 17.42 | 17.49 | 4.50E-17 | 7.47E-14 | 7.58E-10 | 2.19E-08 | 3.77E-02 | 1.75E-02 | 9.84E-01 |
| 267.11008 | 54.35  | 16.60 | 15.73 | 15.45 | 16.44 | 1.12E-06 | 1.31E-03 | 6.12E-06 | 9.04E-01 | 6.24E-01 | 2.29E-02 | 3.72E-04 |
| 267.12684 | 81.09  | 16.63 | 15.08 | 14.27 | 16.05 | 1.23E-04 | 2.34E-02 | 9.72E-05 | 7.21E-01 | 4.63E-01 | 3.31E-01 | 1.06E-02 |
| 267.13405 | 37.65  | 18.21 | 17.93 | 17.92 | 17.22 | 1.77E-08 | 2.35E-01 | 2.08E-01 | 3.90E-09 | 1.00E+00 | 7.10E-05 | 7.27E-05 |
| 267.14087 | 27.77  | 17.69 | 21.45 | 20.66 | 21.15 | 4.22E-61 | 3.65E-14 | 3.65E-14 | 3.65E-14 | 9.21E-05 | 3.88E-01 | 3.65E-02 |
| 267.15897 | 176.07 | 16.68 | 13.36 | 13.67 | 14.53 | 7.86E-18 | 7.41E-14 | 1.40E-13 | 1.98E-07 | 8.44E-01 | 1.55E-02 | 1.18E-01 |
| 267.1953  | 20.32  | 18.31 | 16.07 | 16.19 | 16.55 | 1.97E-38 | 3.65E-14 | 3.65E-14 | 5.41E-14 | 8.51E-01 | 1.84E-02 | 1.30E-01 |
| 267.1954  | 153.28 | 19.15 | 18.60 | 18.88 | 18.83 | 1.08E-01 | 6.39E-02 | 6.13E-01 | 4.88E-01 | 5.96E-01 | 7.63E-01 | 9.95E-01 |
| 267.21046 | 24     | 18.18 | 14.76 | 16.35 | 17.23 | 8.58E-33 | 3.65E-14 | 9.85E-13 | 6.22E-04 | 1.69E-09 | 7.23E-14 | 2.41E-03 |
| 267.23164 | 293.09 | 17.92 | 16.90 | 16.83 | 16.70 | 1.42E-08 | 1.20E-05 | 1.73E-06 | 2.37E-07 | 9.85E-01 | 8.01E-01 | 9.41E-01 |
| 267.26793 | 287.35 | 19.81 | 17.94 | 18.05 | 17.84 | 6.40E-10 | 1.30E-07 | 5.29E-07 | 5.66E-08 | 9.89E-01 | 9.91E-01 | 9.28E-01 |
| 267.26795 | 23.69  | 18.13 | 14.25 | 15.14 | 15.42 | 9.58E-60 | 3.65E-14 | 3.65E-14 | 3.65E-14 | 5.82E-06 | 5.94E-09 | 4.24E-01 |
| 267.55544 | 228.85 | 15.03 | 15.98 | 16.29 | 16.15 | 1.20E-04 | 9.22E-03 | 1.87E-04 | 1.84E-03 | 7.46E-01 | 9.49E-01 | 9.72E-01 |
| 267.56835 | 93.18  | 18.97 | 18.20 | 18.56 | 17.93 | 1.12E-04 | 4.99E-03 | 2.67E-01 | 8.95E-05 | 4.24E-01 | 6.83E-01 | 4.75E-02 |
| 267.61715 | 25.4   | 17.15 | 12.10 | 12.59 | 12.95 | 5.07E-86 | 3.65E-14 | 3.65E-14 | 3.65E-14 | 2.31E-02 | 1.95E-05 | 1.86E-01 |
| 267.64684 | 30.23  | 22.30 | 27.09 | 26.21 | 26.27 | 2.58E-52 | 3.65E-14 | 3.65E-14 | 3.65E-14 | 3.68E-03 | 1.06E-02 | 9.97E-01 |
| 267.84521 | 46.15  | 15.18 | 14.63 | 14.39 | 15.06 | 2.51E-04 | 3.11E-02 | 4.38E-04 | 9.43E-01 | 6.27E-01 | 1.68E-01 | 7.16E-03 |
| 267.88286 | 309.38 | 11.74 | 13.29 | 10.27 | 11.85 | 1.85E-11 | 3.01E-04 | 6.46E-04 | 9.90E-01 | 1.25E-12 | 2.16E-03 | 4.89E-04 |
| 267.92832 | 22.72  | 15.04 | 13.40 | 13.81 | 14.50 | 1.05E-04 | 1.01E-04 | 5.62E-03 | 4.83E-01 | 7.07E-01 | 3.11E-02 | 3.04E-01 |
| 267.9541  | 58.62  | 16.14 | 14.52 | 15.34 | 15.00 | 8.86E-08 | 2.82E-08 | 1.40E-02 | 2.61E-04 | 1.51E-02 | 3.13E-01 | 6.26E-01 |
| 267.96223 | 89.89  | 15.40 | 14.72 | 16.34 | 15.73 | 2.05E-06 | 8.80E-02 | 5.17E-03 | 6.71E-01 | 4.93E-07 | 5.67E-03 | 1.70E-01 |
| 267.96667 | 90.99  | 19.38 | 12.93 | 12.46 | 15.71 | 8.88E-62 | 3.65E-14 | 3.65E-14 | 5.14E-14 | 4.83E-01 | 1.69E-13 | 7.33E-14 |
| 268.00675 | 80.39  | 16.79 | 16.86 | 17.53 | 16.31 | 3.74E-04 | 9.94E-01 | 2.65E-02 | 3.07E-01 | 6.57E-02 | 2.20E-01 | 1.16E-04 |
| 268.02576 | 280.94 | 16.16 | 16.78 | 15.70 | 15.75 | 2.49E-02 | 3.55E-01 | 6.12E-01 | 7.10E-01 | 2.90E-02 | 4.99E-02 | 1.00E+00 |
| 268.05168 | 60.52  | 21.36 | 21.78 | 22.61 | 21.56 | 1.85E-20 | 3.29E-03 | 7.21E-14 | 3.60E-01 | 1.02E-09 | 3.23E-01 | 1.60E-13 |
| 268.05615 | 81.25  | 11.37 | 13.09 | 14.29 | 13.32 | 4.85E-08 | 1.76E-03 | 1.11E-08 | 4.32E-04 | 6.44E-02 | 9.69E-01 | 2.02E-01 |
| 268.05777 | 280.4  | 14.86 | 16.89 | 17.10 | 16.41 | 8.47E-27 | 6.83E-14 | 4.16E-14 | 9.91E-13 | 7.15E-01 | 9.05E-02 | 4.41E-03 |
| 268.06989 | 61.44  | 17.70 | 18.16 | 18.79 | 18.48 | 1.03E-03 | 3.32E-01 | 5.45E-04 | 3.02E-02 | 1.27E-01 | 6.92E-01 | 7.27E-01 |
| 268.08533 | 146.52 | 13.93 | 12.51 | 13.44 | 14.26 | 1.04E-03 | 6.31E-03 | 6.57E-01 | 8.81E-01 | 1.56E-01 | 9.70E-04 | 2.72E-01 |
| 268.10392 | 64.59  | 25.19 | 26.58 | 26.60 | 25.59 | 1.44E-04 | 1.30E-03 | 9.59E-04 | 7.23E-01 | 1.00E+00 | 5.89E-02 | 4.98E-02 |
| 268.14034 | 37.99  | 18.93 | 13.06 | 12.98 | 14.80 | 4.13E-43 | 3.65E-14 | 3.65E-14 | 6.67E-14 | 9.97E-01 | 1.23E-04 | 4.48E-05 |
| 268.14854 | 32.39  | 20.49 | 25.20 | 24.29 | 24.34 | 1.05E-51 | 3.65E-14 | 3.65E-14 | 3.65E-14 | 2.07E-03 | 6.00E-03 | 9.97E-01 |
| 268.15423 | 209.59 | 16.02 | 9.76  | 10.13 | 11.63 | 3.00E-27 | 4.36E-14 | 5.76E-14 | 7.24E-13 | 9.10E-01 | 6.49E-03 | 4.11E-02 |
| 268.19883 | 180.75 | 16.96 | 12.92 | 13.42 | 14.62 | 4.60E-30 | 3.67E-14 | 5.01E-14 | 4.37E-11 | 3.98E-01 | 4.37E-06 | 2.13E-03 |
| 268.22707 | 204.67 | 16.45 | 12.34 | 12.63 | 12.87 | 1.47E-18 | 7.58E-14 | 1.20E-13 | 6.95E-12 | 9.28E-01 | 6.95E-01 | 9.58E-01 |
| 268.26337 | 22.2   | 15.64 | 12.67 | 12.85 | 13.51 | 5.62E-19 | 7.35E-14 | 7.74E-14 | 3.94E-09 | 9.44E-01 | 6.90E-02 | 2.16E-01 |
| 268.26346 | 190.74 | 16.25 | 14.20 | 14.01 | 13.66 | 8.55E-15 | 3.70E-09 | 8.86E-11 | 6.54E-13 | 9.41E-01 | 3.85E-01 | 7.21E-01 |
| 268.27122 | 24.46  | 16.49 | 8.04  | 8.63  | 8.99  | 1.25E-53 | 3.65E-14 | 3.65E-14 | 3.65E-14 | 5.76E-01 | 2.01E-01 | 8.81E-01 |
| 268.5715  | 71.42  | 19.92 | 21.18 | 21.72 | 21.13 | 1.01E-06 | 8.27E-04 | 4.21E-07 | 2.00E-03 | 3.70E-01 | 9.99E-01 | 3.17E-01 |
| 268.64476 | 27.65  | 16.27 | 18.88 | 17.97 | 18.39 | 8.24E-41 | 3.65E-14 | 6.49E-14 | 3.65E-14 | 4.20E-07 | 2.15E-02 | 5.92E-02 |
| 268.64998 | 28.08  | 17.60 | 22.48 | 21.55 | 21.50 | 2.41E-55 | 3.65E-14 | 3.65E-14 | 3.65E-14 | 1.03E-03 | 7.94E-04 | 9.97E-01 |
| 268.65747 | 55.82  | 18.39 | 19.14 | 19.61 | 18.85 | 1.34E-07 | 1.65E-03 | 3.25E-08 | 1.26E-01 | 1.06E-01 | 5.36E-01 | 2.40E-03 |
| 268.66313 | 27.07  | 16.20 | 17.09 | 18.43 | 16.92 | 2.42E-17 | 6.59E-04 | 7.46E-14 | 1.17E-02 | 2.32E-07 | 8.95E-01 | 1.14E-08 |
| 268.83966 | 46.02  | 17.93 | 18.84 | 19.04 | 18.70 | 3.45E-23 | 7.39E-14 | 5.72E-14 | 1.39E-11 | 2.09E-01 | 5.86E-01 | 9.05E-03 |
| 268.84637 | 48.49  | 16.04 | 15.63 | 15.69 | 16.00 | 1.03E-01 | 1.68E-01 | 2.82E-01 | 9.96E-01 | 9.92E-01 | 3.09E-01 | 4.58E-01 |
| 268.89095 | 63.68  | 15.86 | 15.12 | 15.62 | 15.90 | 1.75E-01 | 2.00E-01 | 9.15E-01 | 1.00E+00 | 5.63E-01 | 2.09E-01 | 8.96E-01 |
| 268.90639 | 42.53  | 14.11 | 13.62 | 14.03 | 15.06 | 3.06E-03 | 5.50E-01 | 9.97E-01 | 5.46E-02 | 6.92E-01 | 1.41E-03 | 3.85E-02 |
| 268.94657 | 34.51  | 18.57 | 22.47 | 23.40 | 21.52 | 2.07E-46 | 3.65E-14 | 3.65E-14 | 6.58E-14 | 4.20E-03 | 5.43E-03 | 1.04E-09 |
| 268.96144 | 40.44  | 14.61 | 14.31 | 14.86 | 14.82 | 5.83E-01 | 8.90E-01 | 9.34E-01 | 9.63E-01 | 5.81E-01 | 6.62E-01 | 1.00E+00 |
| 268.97316 | 275.96 | 19.00 | 18.99 | 19.76 | 18.71 | 2.11E-04 | 1.00E+00 | 6.74E-03 | 6.08E-01 | 7.98E-03 | 6.65E-01 | 1.56E-04 |
| 268.98258 | 165.69 | 9.86  | 13.59 | 10.54 | 11.87 | 2.81E-07 | 2.43E-07 | 7.21E-01 | 1.68E-02 | 5.47E-05 | 6.55E-02 | 2.21E-01 |
| 269.01211 | 59.49  | 15.62 | 13.95 | 15.91 | 15.06 | 3.17E-08 | 2.34E-06 | 7.92E-01 | 3.19E-01 | 4.79E-08 | 6.61E-03 | 5.57E-02 |
| 269.02761 | 110.19 | 15.39 | 13.75 | 14.02 | 13.48 | 3.57E-03 | 1.73E-02 | 6.07E-02 | 4.75E-03 | 9.66E-01 | 9.66E-01 | 7.88E-01 |
| 269.0397  | 236.79 | 17.12 | 18.78 | 12.34 | 17.23 | 4.38E-22 | 2.28E-02 | 1.24E-13 | 9.97E-01 | 6.27E-14 | 5.93E-02 | 3.53E-13 |
| 269.05493 | 59.76  | 17.93 | 17.80 | 18.85 | 17.72 | 1.15E-19 | 6.83E-01 | 5.17E-13 | 2.82E-01 | 7.67E-14 | 9.03E-01 | 7.43E-14 |
| 269.07352 | 58.34  | 16.00 | 15.46 | 15.44 | 15.47 | 3.92E-01 | 5.00E-01 | 4.53E-01 | 5.42E-01 | 1.00E+00 | 1.00E+00 | 1.00E+00 |
| 269.08801 | 55.9   | 22.18 | 21.40 | 21.87 | 21.92 | 6.91E-03 | 2.73E-03 | 4.83E-01 | 6.63E-01 | 1.65E-01 | 1.17E-01 | 9.96E-01 |
| 269.09489 | 82.73  | 20.79 | 22.43 | 21.77 | 22.55 | 4.47E-09 | 2.10E-07 | 3.66E-03 | 5.27E-08 | 1.16E-01 | 9.78E-01 | 5.01E-02 |
| 269.10119 | 50.77  | 19.50 | 20.34 | 20.37 | 19.35 | 5.49E-04 | 2.59E-02 | 1.85E-02 | 9.58E-01 | 1.00E+00 | 9.54E-03 | 6.67E-03 |
| 269.10735 | 56.69  | 21.57 | 23.45 | 23.38 | 21.87 | 6.81E-05 | 9.10E-04 | 1.45E-03 | 9.30E-01 | 9.99E-01 | 1.39E-02 | 2.04E-02 |
| 269.1135  | 58.37  | 16.77 | 17.16 | 15.63 | 16.11 | 3.44E-04 | 7.08E-01 | 1.04E-02 | 2.97E-01 | 3.68E-04 | 3.58E-02 | 6.02E-01 |
| 269.12699 | 35.97  | 14.00 | 16.96 | 16.73 | 16.80 | 5.56E-15 | 2.99E-12 | 7.09E-11 | 1.07E-10 | 9.38E-01 | 9.80E-01 | 9.98E-01 |
| 269.14571 | 29.16  | 15.50 | 17.75 | 16.88 | 17.37 | 1.82E-23 | 5.45E-14 | 2.81E-10 | 7.41E-14 | 2.24E-04 | 2.94E-01 | 9.65E-02 |

|           |        |       |       |       |       |          |          |          |          |          |          |          |
|-----------|--------|-------|-------|-------|-------|----------|----------|----------|----------|----------|----------|----------|
| 269.151   | 27.99  | 12.84 | 19.15 | 18.00 | 17.91 | 4.98E-42 | 3.65E-14 | 3.65E-14 | 3.67E-14 | 2.25E-02 | 1.59E-02 | 9.97E-01 |
| 269.16049 | 56.33  | 18.49 | 18.31 | 18.42 | 18.30 | 5.91E-01 | 6.66E-01 | 9.64E-01 | 6.38E-01 | 9.15E-01 | 1.00E+00 | 8.94E-01 |
| 269.17474 | 182.7  | 16.90 | 14.00 | 14.32 | 14.93 | 2.49E-37 | 3.65E-14 | 3.65E-14 | 7.49E-14 | 3.64E-01 | 6.96E-05 | 1.95E-02 |
| 269.21107 | 160.31 | 20.42 | 18.57 | 19.29 | 18.38 | 2.11E-03 | 7.49E-03 | 1.89E-01 | 3.39E-03 | 6.14E-01 | 9.90E-01 | 4.36E-01 |
| 269.2261  | 25.98  | 24.22 | 22.46 | 22.92 | 23.63 | 4.72E-11 | 8.21E-11 | 1.52E-06 | 8.87E-02 | 2.66E-01 | 7.84E-05 | 3.58E-02 |
| 269.23359 | 64.31  | 14.71 | 15.06 | 13.10 | 15.16 | 2.69E-12 | 5.89E-01 | 1.48E-07 | 3.81E-01 | 4.99E-10 | 9.84E-01 | 1.60E-10 |
| 269.24725 | 291.3  | 19.10 | 17.76 | 17.65 | 18.08 | 1.52E-07 | 5.37E-06 | 6.11E-07 | 1.30E-03 | 9.80E-01 | 6.64E-01 | 4.21E-01 |
| 269.52488 | 85.55  | 15.31 | 16.17 | 16.25 | 16.37 | 2.03E-06 | 3.71E-04 | 7.01E-05 | 1.09E-05 | 9.85E-01 | 8.03E-01 | 9.42E-01 |
| 269.5672  | 225.87 | 15.71 | 22.28 | 22.76 | 20.75 | 4.25E-31 | 4.05E-14 | 3.67E-14 | 7.46E-14 | 8.34E-01 | 4.77E-02 | 3.72E-03 |
| 269.57366 | 58.58  | 15.82 | 16.03 | 16.29 | 15.49 | 2.43E-01 | 9.44E-01 | 5.98E-01 | 8.33E-01 | 9.12E-01 | 5.34E-01 | 1.90E-01 |
| 269.59616 | 82.5   | 18.97 | 20.17 | 19.47 | 20.43 | 8.94E-06 | 4.82E-04 | 3.26E-01 | 2.23E-05 | 1.09E-01 | 8.49E-01 | 1.44E-02 |
| 269.64329 | 29.03  | 17.38 | 21.52 | 20.58 | 20.66 | 5.06E-50 | 3.65E-14 | 3.65E-14 | 3.65E-14 | 2.32E-04 | 1.37E-03 | 9.88E-01 |
| 269.92106 | 42.19  | 20.00 | 18.73 | 19.66 | 18.21 | 2.19E-13 | 5.07E-07 | 4.26E-01 | 4.63E-12 | 6.32E-04 | 1.41E-01 | 4.58E-08 |
| 269.95016 | 28.26  | 15.04 | 18.32 | 19.48 | 18.30 | 1.49E-43 | 3.67E-14 | 3.65E-14 | 3.72E-14 | 1.04E-04 | 1.00E+00 | 1.10E-04 |
| 269.9686  | 108.85 | 18.68 | 17.91 | 18.72 | 17.43 | 1.66E-08 | 3.61E-03 | 9.98E-01 | 7.32E-07 | 2.69E-03 | 1.79E-01 | 6.01E-07 |
| 269.99293 | 53.85  | 18.99 | 15.89 | 15.13 | 15.84 | 7.18E-19 | 4.78E-12 | 7.43E-14 | 8.59E-12 | 2.66E-01 | 1.00E+00 | 3.37E-01 |
| 270.01024 | 57.33  | 17.92 | 19.44 | 19.73 | 19.78 | 8.28E-09 | 2.52E-05 | 2.52E-07 | 3.24E-07 | 8.11E-01 | 7.47E-01 | 9.99E-01 |
| 270.04221 | 128.59 | 13.12 | 15.66 | 15.37 | 15.33 | 1.95E-15 | 2.89E-13 | 4.56E-11 | 4.47E-10 | 7.94E-01 | 7.36E-01 | 9.99E-01 |
| 270.04973 | 59.76  | 17.04 | 16.65 | 17.83 | 16.53 | 5.24E-17 | 2.98E-02 | 3.28E-07 | 2.59E-03 | 2.30E-13 | 8.45E-01 | 7.82E-14 |
| 270.05922 | 251.24 | 14.88 | 17.47 | 18.48 | 17.62 | 1.28E-28 | 7.34E-14 | 3.67E-14 | 7.29E-14 | 3.11E-03 | 9.51E-01 | 2.25E-02 |
| 270.06443 | 173.15 | 11.20 | 14.37 | 14.96 | 14.55 | 6.23E-14 | 4.13E-09 | 2.20E-12 | 1.39E-09 | 6.37E-01 | 9.85E-01 | 8.52E-01 |
| 270.06832 | 232.97 | 15.76 | 19.68 | 20.20 | 18.88 | 1.07E-39 | 3.65E-14 | 3.65E-14 | 6.87E-14 | 2.84E-01 | 4.60E-02 | 1.06E-04 |
| 270.09489 | 69.04  | 19.50 | 20.28 | 18.96 | 20.48 | 5.40E-05 | 1.00E-01 | 3.82E-01 | 2.55E-02 | 1.09E-03 | 9.40E-01 | 1.63E-04 |
| 270.10418 | 37.76  | 16.44 | 15.35 | 15.31 | 15.00 | 2.81E-07 | 1.72E-04 | 7.35E-05 | 5.98E-07 | 9.99E-01 | 5.58E-01 | 6.48E-01 |
| 270.10929 | 40.31  | 18.28 | 18.53 | 18.57 | 17.77 | 3.29E-02 | 8.08E-01 | 7.20E-01 | 2.92E-01 | 9.99E-01 | 5.43E-02 | 3.55E-02 |
| 270.11293 | 295.1  | 12.63 | 14.33 | 14.83 | 12.92 | 4.26E-09 | 6.11E-05 | 8.40E-08 | 8.83E-01 | 5.68E-01 | 2.63E-03 | 1.43E-05 |
| 270.11975 | 91.33  | 17.03 | 17.47 | 17.55 | 17.26 | 1.66E-01 | 3.02E-01 | 1.57E-01 | 8.06E-01 | 9.88E-01 | 8.64E-01 | 6.89E-01 |
| 270.13352 | 219.94 | 16.46 | 13.43 | 13.71 | 14.83 | 3.09E-15 | 1.73E-13 | 7.33E-12 | 1.40E-04 | 8.77E-01 | 2.26E-03 | 2.17E-02 |
| 270.14488 | 32.18  | 16.85 | 19.34 | 18.40 | 19.00 | 4.67E-40 | 3.65E-14 | 7.61E-14 | 3.65E-14 | 7.82E-08 | 1.56E-01 | 1.90E-03 |
| 270.16994 | 225.61 | 16.97 | 14.32 | 14.44 | 14.86 | 1.69E-26 | 5.34E-14 | 6.52E-14 | 8.06E-14 | 9.64E-01 | 1.38E-01 | 3.21E-01 |
| 270.2143  | 287.72 | 18.35 | 17.14 | 17.07 | 17.27 | 3.25E-08 | 2.13E-06 | 3.64E-07 | 4.63E-05 | 9.91E-01 | 9.54E-01 | 8.47E-01 |
| 270.22942 | 25.09  | 21.98 | 20.05 | 20.56 | 21.16 | 5.62E-11 | 4.22E-11 | 1.29E-06 | 1.63E-02 | 2.32E-01 | 6.12E-04 | 1.47E-01 |
| 270.2428  | 161.79 | 17.10 | 14.65 | 14.85 | 15.40 | 3.61E-24 | 6.38E-14 | 7.34E-14 | 2.15E-11 | 8.27E-01 | 1.11E-02 | 9.97E-02 |
| 270.25084 | 189.66 | 16.44 | 10.61 | 10.54 | 12.65 | 9.38E-24 | 7.29E-14 | 6.96E-14 | 2.87E-09 | 9.99E-01 | 4.42E-03 | 2.63E-03 |
| 270.27894 | 289.63 | 17.15 | 16.53 | 16.60 | 16.25 | 2.30E-03 | 4.23E-02 | 8.51E-02 | 1.26E-03 | 9.91E-01 | 6.69E-01 | 4.82E-01 |
| 270.27898 | 21.01  | 16.29 | 13.25 | 13.45 | 14.03 | 4.82E-41 | 3.65E-14 | 3.65E-14 | 5.41E-14 | 7.57E-01 | 1.12E-03 | 2.40E-02 |
| 270.51184 | 56.57  | 15.36 | 15.73 | 15.14 | 15.87 | 3.49E-01 | 8.21E-01 | 9.57E-01 | 6.50E-01 | 5.39E-01 | 9.90E-01 | 3.71E-01 |
| 270.5538  | 90.45  | 16.45 | 15.77 | 16.40 | 15.96 | 2.53E-03 | 5.86E-03 | 9.93E-01 | 1.00E-01 | 1.68E-02 | 8.06E-01 | 1.91E-01 |
| 270.56077 | 256.29 | 16.27 | 17.29 | 18.43 | 17.36 | 2.65E-14 | 2.60E-04 | 7.66E-14 | 1.21E-04 | 5.30E-05 | 9.92E-01 | 2.78E-04 |
| 270.56776 | 227.38 | 11.66 | 16.32 | 13.69 | 15.60 | 1.14E-14 | 1.65E-13 | 1.98E-03 | 5.80E-10 | 5.41E-05 | 6.29E-01 | 7.94E-03 |
| 270.59487 | 80.69  | 15.88 | 16.40 | 15.33 | 16.65 | 1.06E-03 | 4.01E-01 | 3.44E-01 | 1.13E-01 | 1.03E-02 | 8.96E-01 | 1.18E-03 |
| 270.62337 | 27.24  | 16.52 | 20.42 | 19.40 | 19.24 | 1.02E-29 | 3.65E-14 | 7.47E-14 | 7.45E-14 | 4.77E-03 | 1.13E-03 | 9.54E-01 |
| 270.64146 | 27.46  | 16.45 | 19.10 | 17.92 | 18.65 | 1.38E-47 | 3.65E-14 | 7.09E-14 | 3.65E-14 | 4.93E-13 | 1.72E-02 | 1.67E-05 |
| 270.78956 | 44.77  | 21.29 | 21.72 | 21.64 | 21.27 | 5.04E-02 | 1.22E-01 | 2.61E-01 | 1.00E+00 | 9.79E-01 | 1.39E-01 | 2.81E-01 |
| 270.79745 | 49.91  | 17.60 | 18.51 | 18.59 | 18.42 | 1.32E-04 | 1.31E-03 | 3.22E-04 | 6.52E-03 | 9.89E-01 | 9.85E-01 | 9.08E-01 |
| 270.94458 | 33.56  | 15.55 | 19.69 | 20.59 | 18.86 | 1.78E-48 | 3.65E-14 | 3.65E-14 | 4.05E-14 | 7.82E-03 | 2.13E-02 | 3.28E-08 |
| 270.95029 | 41.92  | 13.11 | 13.87 | 15.95 | 13.45 | 9.31E-19 | 5.00E-02 | 7.25E-14 | 6.65E-01 | 3.85E-10 | 5.39E-01 | 3.75E-13 |
| 270.95792 | 48.46  | 18.25 | 18.68 | 19.40 | 19.18 | 2.41E-06 | 2.21E-01 | 3.07E-06 | 4.53E-04 | 1.08E-02 | 1.62E-01 | 7.80E-01 |
| 270.97809 | 55.55  | 17.67 | 18.89 | 19.19 | 18.71 | 8.51E-20 | 5.09E-13 | 7.47E-14 | 1.34E-09 | 2.00E-01 | 6.89E-01 | 1.41E-02 |
| 270.98918 | 30.71  | 13.42 | 15.94 | 15.71 | 14.58 | 7.62E-12 | 1.38E-10 | 3.84E-09 | 9.40E-03 | 9.23E-01 | 2.34E-03 | 1.57E-02 |
| 271.00733 | 65.65  | 16.84 | 16.80 | 17.04 | 17.29 | 5.86E-01 | 9.99E-01 | 9.49E-01 | 6.45E-01 | 9.18E-01 | 5.94E-01 | 9.21E-01 |
| 271.01215 | 55.96  | 13.55 | 13.20 | 14.77 | 15.00 | 8.52E-05 | 8.52E-01 | 2.68E-02 | 7.74E-03 | 3.01E-03 | 7.58E-04 | 9.60E-01 |
| 271.02535 | 83.87  | 15.83 | 16.92 | 17.39 | 16.34 | 1.93E-10 | 1.34E-05 | 1.63E-10 | 1.15E-01 | 1.74E-01 | 7.77E-02 | 8.73E-05 |
| 271.04283 | 78.07  | 20.34 | 20.40 | 21.19 | 20.51 | 1.08E-02 | 9.95E-01 | 1.18E-02 | 9.27E-01 | 3.10E-02 | 9.82E-01 | 9.68E-01 |
| 271.06775 | 154.35 | 10.73 | 17.07 | 16.48 | 14.62 | 6.19E-38 | 3.65E-14 | 3.65E-14 | 7.65E-14 | 5.18E-01 | 8.27E-07 | 2.74E-04 |
| 271.07469 | 58.03  | 18.92 | 17.57 | 17.72 | 17.22 | 2.09E-13 | 5.95E-09 | 1.96E-07 | 1.17E-12 | 9.00E-01 | 3.96E-01 | 1.10E-01 |
| 271.09123 | 53.7   | 17.08 | 15.23 | 14.98 | 16.66 | 1.11E-06 | 1.90E-04 | 1.29E-05 | 7.83E-01 | 9.43E-01 | 1.19E-02 | 1.72E-03 |
| 271.1037  | 111.09 | 17.19 | 19.06 | 19.09 | 18.83 | 5.66E-33 | 3.72E-14 | 3.67E-14 | 6.81E-14 | 9.97E-01 | 4.63E-01 | 3.40E-01 |
| 271.12862 | 280.94 | 19.36 | 16.63 | 16.53 | 17.17 | 5.32E-29 | 4.72E-14 | 3.90E-14 | 7.49E-14 | 9.75E-01 | 1.41E-01 | 5.15E-02 |
| 271.13763 | 54.14  | 17.88 | 18.40 | 17.65 | 18.33 | 1.42E-04 | 2.52E-02 | 5.95E-01 | 7.68E-02 | 5.29E-04 | 9.86E-01 | 2.69E-03 |
| 271.14311 | 28.75  | 15.77 | 18.40 | 16.87 | 17.14 | 9.37E-19 | 7.12E-14 | 9.82E-05 | 1.89E-06 | 7.24E-08 | 2.34E-05 | 7.48E-01 |
| 271.1904  | 221.72 | 16.78 | 14.26 | 14.25 | 14.56 | 5.85E-18 | 9.95E-14 | 8.58E-14 | 3.68E-11 | 1.00E+00 | 7.86E-01 | 7.62E-01 |
| 271.20534 | 28.63  | 16.92 | 12.48 | 14.56 | 15.78 | 4.06E-22 | 5.38E-14 | 4.93E-08 | 2.89E-02 | 4.00E-06 | 1.14E-12 | 1.97E-02 |
| 271.20557 | 193.02 | 16.59 | 13.81 | 13.79 | 14.60 | 5.41E-21 | 7.62E-14 | 7.38E-14 | 1.36E-09 | 1.00E+00 | 5.57E-02 | 4.50E-02 |
| 271.22661 | 144.84 | 20.06 | 19.68 | 19.57 | 19.38 | 2.20E-01 | 6.64E-01 | 4.32E-01 | 1.78E-01 | 9.86E-01 | 8.07E-01 | 9.42E-01 |
| 271.23271 | 23.8   | 18.61 | 14.98 | 16.27 | 17.19 | 3.58E-25 | 3.76E-14 | 6.73E-13 | 3.70E-05 | 2.01E-04 | 1.49E-10 | 1.74E-02 |
| 271.24163 | 23.83  | 16.93 | 13.55 | 13.94 | 14.89 | 4.05E-27 | 3.94E-14 | 6.81E-14 | 1.61E-10 | 5.29E-01 | 7.58E-05 | 9.13E-03 |
| 271.26296 | 289.85 | 17.08 | 16.00 | 16.16 | 16.08 | 4.91E-07 | 3.61E-06 | 9.09E-05 | 3.35E-05 | 8.80E-01 | 9.86E-01 | 9.82E-01 |

|           |        |       |       |       |       |          |          |          |          |          |          |          |
|-----------|--------|-------|-------|-------|-------|----------|----------|----------|----------|----------|----------|----------|
| 271.26305 | 172.33 | 17.67 | 15.64 | 16.01 | 16.06 | 8.55E-20 | 7.41E-14 | 3.24E-13 | 6.78E-12 | 3.00E-01 | 2.16E-01 | 9.95E-01 |
| 271.55755 | 119.65 | 17.08 | 11.76 | 13.86 | 12.67 | 5.02E-17 | 7.32E-14 | 3.71E-07 | 1.52E-11 | 2.76E-03 | 4.56E-01 | 2.05E-01 |
| 271.64183 | 28.19  | 15.42 | 17.61 | 15.77 | 17.43 | 9.44E-25 | 7.27E-14 | 3.68E-01 | 7.44E-14 | 1.48E-13 | 8.57E-01 | 3.54E-11 |
| 271.64937 | 31.57  | 15.75 | 18.09 | 16.67 | 17.85 | 3.93E-37 | 3.65E-14 | 1.57E-07 | 3.67E-14 | 8.43E-14 | 5.03E-01 | 2.19E-10 |
| 271.65808 | 36.23  | 16.55 | 19.39 | 20.47 | 18.97 | 1.19E-38 | 4.30E-14 | 3.65E-14 | 7.41E-14 | 1.30E-04 | 3.67E-01 | 9.71E-08 |
| 271.91707 | 21.84  | 20.87 | 16.67 | 17.04 | 18.12 | 3.14E-74 | 3.65E-14 | 3.65E-14 | 3.65E-14 | 1.17E-01 | 9.10E-14 | 5.08E-09 |
| 271.94658 | 26.12  | 14.17 | 13.50 | 14.92 | 13.81 | 6.79E-11 | 3.30E-03 | 5.63E-04 | 2.74E-01 | 4.39E-11 | 4.14E-01 | 6.02E-07 |
| 271.95433 | 26.31  | 15.92 | 13.57 | 13.90 | 14.49 | 7.82E-10 | 2.33E-09 | 2.42E-07 | 7.56E-04 | 8.06E-01 | 7.67E-02 | 4.03E-01 |
| 271.96379 | 50.92  | 17.70 | 14.11 | 14.99 | 15.37 | 3.61E-14 | 1.15E-13 | 5.79E-09 | 1.78E-06 | 1.93E-01 | 2.96E-02 | 8.25E-01 |
| 271.98537 | 267.43 | 17.29 | 19.42 | 18.38 | 17.62 | 5.45E-05 | 4.19E-05 | 8.69E-02 | 9.01E-01 | 1.25E-01 | 1.69E-03 | 4.05E-01 |
| 271.98561 | 144.22 | 18.52 | 20.52 | 19.44 | 18.47 | 5.27E-06 | 2.11E-05 | 1.26E-01 | 9.99E-01 | 6.06E-02 | 4.11E-05 | 1.29E-01 |
| 272.00363 | 252.89 | 13.63 | 16.51 | 15.95 | 13.97 | 1.12E-18 | 7.78E-14 | 9.71E-11 | 7.55E-01 | 3.54E-01 | 3.41E-11 | 1.88E-07 |
| 272.02042 | 257    | 17.36 | 15.57 | 16.15 | 15.56 | 1.12E-10 | 3.52E-09 | 8.49E-05 | 7.51E-09 | 1.78E-01 | 1.00E+00 | 1.85E-01 |
| 272.03001 | 249.23 | 12.40 | 14.86 | 16.33 | 14.46 | 1.73E-16 | 7.05E-08 | 7.47E-14 | 1.48E-05 | 3.67E-03 | 7.99E-01 | 1.58E-04 |
| 272.06531 | 138.26 | 20.04 | 21.32 | 21.58 | 19.94 | 3.35E-09 | 1.27E-04 | 1.67E-06 | 9.87E-01 | 8.11E-01 | 8.86E-05 | 1.45E-06 |
| 272.06973 | 64.76  | 14.02 | 15.47 | 14.69 | 14.38 | 4.44E-03 | 2.11E-03 | 3.41E-01 | 8.18E-01 | 2.27E-01 | 5.33E-02 | 8.88E-01 |
| 272.07711 | 72.66  | 16.03 | 15.41 | 14.89 | 15.55 | 1.81E-01 | 6.25E-01 | 1.18E-01 | 8.05E-01 | 7.59E-01 | 9.93E-01 | 6.10E-01 |
| 272.09002 | 75.54  | 16.63 | 15.88 | 16.50 | 16.76 | 8.01E-04 | 3.97E-03 | 9.36E-01 | 9.30E-01 | 2.95E-02 | 9.62E-04 | 6.63E-01 |
| 272.13369 | 60.78  | 15.10 | 13.78 | 13.80 | 14.11 | 1.20E-01 | 1.56E-01 | 1.57E-01 | 4.13E-01 | 1.00E+00 | 9.62E-01 | 9.66E-01 |
| 272.14916 | 206.52 | 17.49 | 14.83 | 15.26 | 15.51 | 6.60E-38 | 3.65E-14 | 3.67E-14 | 5.85E-14 | 8.08E-02 | 1.97E-03 | 5.47E-01 |
| 272.15955 | 33.9   | 15.23 | 17.64 | 18.78 | 17.51 | 6.59E-26 | 1.16E-13 | 3.72E-14 | 2.54E-12 | 9.04E-04 | 9.74E-01 | 2.46E-04 |
| 272.17158 | 58.59  | 18.03 | 17.06 | 17.53 | 17.30 | 3.67E-06 | 1.83E-06 | 2.99E-02 | 8.21E-04 | 6.79E-02 | 6.04E-01 | 6.52E-01 |
| 272.18536 | 24.42  | 17.36 | 17.02 | 16.84 | 16.42 | 5.16E-07 | 1.49E-01 | 5.38E-03 | 1.13E-07 | 6.53E-01 | 1.83E-03 | 5.49E-02 |
| 272.18565 | 182.91 | 17.16 | 14.68 | 15.01 | 15.57 | 2.84E-36 | 3.65E-14 | 3.67E-14 | 7.44E-14 | 2.29E-01 | 7.32E-06 | 9.28E-03 |
| 272.22998 | 287.85 | 17.87 | 16.76 | 16.74 | 16.61 | 3.44E-08 | 8.13E-06 | 4.71E-06 | 7.10E-07 | 1.00E+00 | 9.27E-01 | 9.45E-01 |
| 272.25816 | 23.28  | 16.32 | 13.28 | 13.12 | 15.74 | 2.96E-26 | 7.42E-14 | 7.16E-14 | 2.63E-01 | 9.61E-01 | 8.76E-12 | 3.78E-13 |
| 272.56677 | 132.84 | 17.99 | 18.66 | 18.92 | 17.30 | 3.15E-07 | 8.41E-02 | 5.22E-03 | 7.73E-02 | 7.96E-01 | 4.43E-05 | 5.62E-07 |
| 272.58323 | 70.47  | 16.31 | 14.60 | 16.21 | 14.86 | 3.77E-05 | 4.89E-04 | 9.95E-01 | 6.13E-03 | 1.69E-03 | 9.37E-01 | 1.59E-02 |
| 272.65709 | 27.27  | 15.75 | 20.23 | 19.71 | 19.57 | 1.97E-55 | 3.65E-14 | 3.65E-14 | 3.65E-14 | 1.22E-01 | 3.32E-02 | 9.31E-01 |
| 272.66586 | 34.04  | 14.85 | 18.14 | 19.15 | 17.60 | 4.74E-28 | 7.43E-14 | 3.67E-14 | 8.05E-13 | 2.16E-02 | 4.29E-01 | 1.19E-04 |
| 272.78692 | 44.71  | 21.07 | 21.54 | 21.45 | 21.09 | 4.35E-02 | 8.81E-02 | 2.17E-01 | 9.99E-01 | 9.73E-01 | 1.52E-01 | 3.21E-01 |
| 272.79449 | 49.52  | 17.51 | 18.99 | 19.06 | 18.85 | 7.77E-08 | 3.75E-06 | 9.52E-07 | 5.87E-05 | 9.96E-01 | 9.67E-01 | 9.02E-01 |
| 272.85483 | 100.74 | 18.56 | 15.26 | 17.28 | 15.37 | 1.80E-18 | 7.47E-14 | 3.47E-03 | 1.29E-13 | 1.71E-06 | 9.91E-01 | 1.29E-05 |
| 272.86377 | 120.94 | 14.55 | 15.43 | 15.34 | 16.18 | 3.58E-04 | 7.07E-02 | 1.21E-01 | 9.28E-05 | 9.95E-01 | 2.05E-01 | 1.20E-01 |
| 272.95576 | 43.82  | 17.01 | 16.59 | 17.51 | 17.56 | 9.71E-06 | 1.69E-01 | 6.24E-02 | 4.42E-02 | 8.62E-05 | 6.43E-05 | 9.96E-01 |
| 272.96933 | 281.67 | 19.29 | 22.37 | 22.71 | 21.36 | 1.68E-17 | 3.09E-13 | 7.45E-14 | 1.60E-06 | 8.28E-01 | 6.29E-02 | 5.14E-03 |
| 272.98093 | 48.97  | 14.81 | 12.33 | 15.45 | 13.51 | 1.69E-09 | 2.07E-06 | 5.20E-01 | 3.95E-02 | 4.07E-09 | 8.65E-02 | 7.08E-04 |
| 272.98866 | 56.12  | 17.10 | 13.18 | 15.77 | 15.16 | 1.62E-16 | 7.43E-14 | 6.92E-03 | 4.15E-05 | 1.78E-08 | 4.68E-05 | 4.89E-01 |
| 272.9889  | 138.39 | 13.35 | 14.39 | 11.60 | 11.67 | 2.07E-06 | 2.65E-01 | 1.12E-02 | 2.22E-02 | 1.82E-05 | 5.99E-05 | 9.99E-01 |
| 273.00567 | 83.76  | 18.32 | 19.61 | 19.14 | 19.02 | 1.17E-06 | 2.60E-07 | 1.93E-03 | 1.64E-02 | 1.84E-01 | 6.89E-02 | 9.56E-01 |
| 273.01848 | 53.17  | 21.19 | 22.44 | 22.41 | 21.97 | 4.98E-30 | 3.74E-14 | 3.90E-14 | 1.19E-11 | 9.88E-01 | 1.28E-04 | 4.05E-04 |
| 273.0377  | 258.74 | 18.56 | 20.93 | 21.67 | 20.68 | 5.34E-34 | 6.01E-14 | 3.65E-14 | 7.45E-14 | 4.77E-03 | 7.14E-01 | 1.15E-04 |
| 273.04905 | 50.3   | 17.44 | 16.52 | 16.61 | 16.74 | 1.05E-03 | 1.75E-03 | 5.25E-03 | 3.55E-02 | 9.87E-01 | 8.42E-01 | 9.58E-01 |
| 273.0674  | 136.78 | 15.90 | 15.16 | 15.36 | 14.52 | 4.97E-04 | 8.98E-02 | 2.99E-01 | 1.42E-04 | 9.32E-01 | 2.06E-01 | 5.34E-02 |
| 273.07506 | 61.9   | 17.88 | 19.06 | 19.38 | 18.80 | 4.19E-33 | 5.65E-14 | 3.65E-14 | 1.06E-13 | 1.71E-02 | 9.25E-02 | 2.03E-06 |
| 273.08269 | 69.29  | 19.08 | 18.33 | 18.32 | 18.39 | 1.30E-03 | 5.43E-03 | 4.09E-03 | 1.49E-02 | 1.00E+00 | 9.96E-01 | 9.93E-01 |
| 273.1081  | 64.96  | 15.32 | 15.59 | 14.59 | 15.41 | 2.16E-01 | 9.47E-01 | 4.36E-01 | 9.98E-01 | 1.95E-01 | 9.86E-01 | 3.83E-01 |
| 273.12117 | 54.2   | 18.55 | 18.35 | 17.87 | 18.54 | 2.04E-02 | 8.53E-01 | 2.45E-02 | 1.00E+00 | 2.02E-01 | 8.78E-01 | 3.96E-02 |
| 273.13491 | 31.17  | 14.82 | 15.99 | 16.52 | 11.82 | 4.07E-15 | 1.20E-01 | 6.90E-03 | 4.89E-07 | 7.58E-01 | 1.05E-11 | 9.34E-14 |
| 273.14445 | 239.61 | 18.50 | 20.29 | 20.51 | 19.97 | 3.69E-20 | 8.14E-14 | 7.53E-14 | 2.32E-10 | 7.20E-01 | 4.73E-01 | 6.54E-02 |
| 273.15877 | 27.55  | 16.30 | 18.19 | 17.73 | 18.05 | 2.32E-40 | 3.65E-14 | 4.19E-14 | 3.65E-14 | 1.58E-03 | 7.26E-01 | 5.48E-02 |
| 273.16711 | 235.15 | 17.74 | 15.65 | 16.14 | 16.47 | 5.46E-26 | 3.83E-14 | 7.43E-14 | 5.41E-11 | 2.77E-02 | 6.51E-05 | 2.77E-01 |
| 273.17411 | 71.16  | 15.56 | 16.08 | 16.52 | 16.14 | 5.77E-02 | 4.43E-01 | 3.10E-02 | 3.71E-01 | 6.16E-01 | 9.99E-01 | 7.33E-01 |
| 273.18461 | 23.66  | 17.03 | 13.42 | 14.65 | 15.85 | 1.37E-44 | 3.65E-14 | 3.92E-14 | 2.01E-07 | 4.92E-08 | 4.79E-14 | 2.68E-07 |
| 273.18477 | 190.77 | 17.12 | 14.25 | 14.30 | 15.10 | 1.03E-32 | 3.65E-14 | 3.67E-14 | 7.65E-14 | 9.95E-01 | 1.91E-03 | 3.94E-03 |
| 273.22129 | 192.17 | 16.23 | 13.59 | 12.72 | 13.87 | 2.79E-08 | 4.01E-05 | 1.73E-08 | 4.76E-04 | 4.48E-01 | 9.67E-01 | 2.23E-01 |
| 273.25743 | 24.07  | 17.87 | 15.55 | 15.77 | 16.18 | 5.59E-37 | 3.65E-14 | 3.65E-14 | 7.18E-14 | 5.28E-01 | 1.34E-03 | 7.15E-02 |
| 273.49254 | 85.74  | 15.38 | 17.93 | 17.78 | 17.00 | 4.30E-24 | 6.54E-14 | 7.42E-14 | 1.23E-09 | 9.25E-01 | 1.56E-03 | 1.09E-02 |
| 273.54116 | 264.25 | 15.44 | 15.10 | 15.75 | 13.78 | 8.62E-11 | 5.80E-01 | 6.22E-01 | 2.94E-08 | 7.77E-02 | 2.69E-05 | 1.05E-10 |
| 273.56377 | 93.47  | 16.78 | 17.38 | 17.38 | 16.67 | 1.20E-03 | 3.33E-02 | 3.14E-02 | 9.65E-01 | 1.00E+00 | 1.38E-02 | 1.29E-02 |
| 273.58292 | 85.99  | 15.98 | 16.11 | 15.83 | 15.69 | 4.16E-01 | 9.45E-01 | 9.39E-01 | 6.76E-01 | 6.90E-01 | 3.74E-01 | 9.46E-01 |
| 273.64667 | 27.78  | 15.67 | 17.98 | 16.91 | 17.76 | 9.56E-29 | 3.72E-14 | 1.08E-09 | 6.16E-14 | 3.72E-07 | 6.83E-01 | 1.24E-04 |
| 273.66492 | 28.66  | 15.79 | 19.06 | 18.41 | 18.76 | 2.72E-51 | 3.65E-14 | 3.65E-14 | 3.65E-14 | 2.38E-03 | 3.91E-01 | 2.33E-01 |
| 273.67379 | 22.42  | 10.34 | 14.82 | 18.01 | 14.94 | 4.85E-25 | 6.45E-11 | 3.72E-14 | 6.58E-11 | 7.62E-06 | 9.98E-01 | 2.95E-05 |
| 273.89611 | 303.8  | 14.95 | 17.63 | 16.36 | 16.54 | 1.62E-12 | 2.21E-13 | 1.23E-04 | 2.55E-05 | 1.19E-03 | 1.01E-02 | 9.58E-01 |
| 273.97303 | 197.4  | 12.88 | 16.93 | 17.29 | 15.13 | 3.49E-21 | 7.47E-14 | 7.41E-14 | 8.36E-06 | 8.48E-01 | 1.00E-03 | 3.49E-05 |
| 273.97859 | 256.73 | 16.85 | 17.93 | 17.91 | 16.71 | 6.91E-05 | 5.73E-03 | 5.88E-03 | 9.73E-01 | 1.00E+00 | 2.58E-03 | 2.64E-03 |
| 273.99315 | 85.64  | 15.48 | 16.09 | 16.11 | 15.46 | 3.26E-03 | 3.96E-02 | 2.79E-02 | 1.00E+00 | 1.00E+00 | 5.00E-02 | 3.66E-02 |

|           |        |       |       |       |       |          |          |          |          |          |          |          |
|-----------|--------|-------|-------|-------|-------|----------|----------|----------|----------|----------|----------|----------|
| 274.00749 | 90.51  | 14.52 | 14.06 | 13.09 | 14.92 | 1.18E-02 | 8.41E-01 | 4.63E-02 | 8.90E-01 | 3.14E-01 | 4.52E-01 | 9.28E-03 |
| 274.01471 | 287.69 | 15.57 | 16.42 | 17.86 | 16.40 | 1.14E-16 | 2.83E-03 | 7.45E-14 | 4.88E-03 | 8.81E-08 | 1.00E+00 | 1.31E-07 |
| 274.02152 | 63.31  | 16.77 | 17.12 | 17.07 | 16.72 | 5.89E-03 | 4.05E-02 | 1.11E-01 | 9.88E-01 | 9.75E-01 | 2.57E-02 | 7.16E-02 |
| 274.03518 | 35.55  | 15.30 | 13.05 | 15.81 | 15.39 | 1.98E-17 | 4.57E-12 | 3.07E-01 | 9.92E-01 | 7.54E-14 | 1.10E-11 | 5.28E-01 |
| 274.04034 | 270.97 | 11.40 | 15.85 | 17.03 | 15.48 | 1.26E-55 | 3.65E-14 | 3.65E-14 | 3.65E-14 | 1.83E-04 | 5.69E-01 | 8.05E-07 |
| 274.0584  | 57.68  | 17.83 | 16.90 | 17.13 | 16.00 | 6.44E-05 | 5.98E-02 | 2.24E-01 | 1.44E-05 | 9.31E-01 | 9.81E-02 | 1.99E-02 |
| 274.06851 | 223.08 | 15.37 | 17.17 | 17.15 | 16.28 | 2.52E-26 | 5.70E-14 | 5.85E-14 | 9.90E-07 | 9.99E-01 | 2.94E-06 | 4.27E-06 |
| 274.08557 | 57.18  | 14.51 | 15.67 | 15.75 | 15.32 | 1.87E-03 | 6.85E-03 | 2.68E-03 | 1.17E-01 | 9.95E-01 | 7.95E-01 | 6.53E-01 |
| 274.09192 | 285.04 | 18.39 | 18.17 | 19.29 | 17.84 | 2.56E-07 | 7.90E-01 | 1.27E-03 | 1.15E-01 | 5.57E-05 | 5.65E-01 | 1.93E-07 |
| 274.10341 | 215.38 | 12.30 | 16.83 | 16.87 | 16.84 | 5.41E-34 | 3.72E-14 | 3.70E-14 | 3.87E-14 | 1.00E+00 | 1.00E+00 | 1.00E+00 |
| 274.10346 | 68.58  | 13.72 | 14.29 | 14.15 | 15.38 | 2.71E-05 | 2.90E-01 | 5.35E-01 | 7.94E-06 | 9.74E-01 | 1.01E-02 | 2.29E-03 |
| 274.11098 | 28.26  | 13.70 | 14.69 | 13.73 | 15.53 | 9.08E-05 | 9.74E-02 | 1.00E+00 | 2.82E-04 | 1.27E-01 | 2.62E-01 | 5.17E-04 |
| 274.12176 | 40.36  | 14.29 | 17.04 | 18.16 | 17.48 | 1.35E-24 | 3.44E-13 | 4.67E-14 | 7.49E-14 | 7.83E-03 | 6.11E-01 | 2.27E-01 |
| 274.12862 | 208.6  | 16.05 | 13.54 | 13.78 | 14.25 | 1.22E-04 | 2.30E-04 | 9.50E-04 | 1.97E-02 | 9.80E-01 | 6.74E-01 | 8.75E-01 |
| 274.14802 | 220.75 | 15.11 | 16.10 | 15.65 | 16.11 | 1.97E-05 | 9.23E-05 | 7.80E-02 | 1.24E-04 | 1.99E-01 | 1.00E+00 | 2.01E-01 |
| 274.15882 | 275.46 | 17.20 | 15.85 | 15.83 | 16.05 | 1.17E-13 | 5.80E-11 | 1.88E-11 | 5.16E-08 | 9.99E-01 | 7.54E-01 | 6.81E-01 |
| 274.16503 | 28.66  | 18.36 | 18.26 | 18.17 | 18.04 | 2.14E-02 | 7.17E-01 | 2.36E-01 | 1.22E-02 | 8.56E-01 | 1.93E-01 | 6.06E-01 |
| 274.17538 | 47.38  | 14.63 | 15.41 | 16.57 | 16.28 | 4.72E-05 | 2.77E-01 | 6.38E-05 | 1.61E-03 | 4.87E-02 | 2.42E-01 | 9.18E-01 |
| 274.18532 | 40.52  | 17.51 | 18.21 | 18.06 | 18.02 | 3.41E-04 | 2.96E-04 | 6.82E-03 | 2.06E-02 | 8.19E-01 | 7.02E-01 | 9.95E-01 |
| 274.20097 | 24.58  | 17.40 | 15.92 | 16.70 | 16.87 | 2.44E-13 | 9.60E-14 | 4.02E-04 | 1.84E-02 | 1.15E-04 | 3.34E-06 | 7.82E-01 |
| 274.27387 | 23.1   | 13.57 | 14.68 | 12.05 | 13.26 | 1.24E-12 | 2.51E-03 | 1.05E-05 | 7.82E-01 | 1.74E-13 | 1.63E-04 | 1.48E-03 |
| 274.58293 | 85.6   | 14.78 | 16.66 | 15.49 | 15.48 | 1.66E-07 | 2.35E-08 | 8.84E-02 | 1.19E-01 | 1.50E-03 | 1.96E-03 | 1.00E+00 |
| 274.6241  | 30.49  | 18.94 | 13.25 | 15.16 | 14.86 | 9.76E-46 | 3.65E-14 | 3.74E-14 | 3.67E-14 | 4.07E-08 | 1.03E-05 | 7.91E-01 |
| 274.63548 | 28     | 17.77 | 15.32 | 16.08 | 15.09 | 5.37E-11 | 9.06E-09 | 9.68E-05 | 8.90E-10 | 2.31E-01 | 9.44E-01 | 7.67E-02 |
| 274.65465 | 29.81  | 16.65 | 20.71 | 19.87 | 20.21 | 2.41E-51 | 3.65E-14 | 3.65E-14 | 3.65E-14 | 1.10E-03 | 1.23E-01 | 4.59E-01 |
| 274.78454 | 44.77  | 19.48 | 19.72 | 19.67 | 19.33 | 1.79E-01 | 5.59E-01 | 7.34E-01 | 8.64E-01 | 9.92E-01 | 1.95E-01 | 3.10E-01 |
| 274.79162 | 50.14  | 17.20 | 17.87 | 17.98 | 17.92 | 2.83E-03 | 2.47E-02 | 5.08E-03 | 1.65E-02 | 9.66E-01 | 9.97E-01 | 9.95E-01 |
| 274.87315 | 45.67  | 19.82 | 20.40 | 20.63 | 20.56 | 1.91E-07 | 7.97E-04 | 5.11E-07 | 1.47E-05 | 3.97E-01 | 7.34E-01 | 9.59E-01 |
| 274.88114 | 48.72  | 16.16 | 16.52 | 16.35 | 16.84 | 7.56E-03 | 2.49E-01 | 7.75E-01 | 4.00E-03 | 8.10E-01 | 3.99E-01 | 7.07E-02 |
| 274.90707 | 47.75  | 16.69 | 17.13 | 18.30 | 17.69 | 1.06E-24 | 8.58E-03 | 4.12E-14 | 1.12E-10 | 1.36E-13 | 9.00E-04 | 2.03E-04 |
| 274.92984 | 307.23 | 14.69 | 15.49 | 13.06 | 13.01 | 1.67E-25 | 3.01E-03 | 7.22E-11 | 8.96E-11 | 7.12E-14 | 7.45E-14 | 9.97E-01 |
| 274.93301 | 42.19  | 17.33 | 18.90 | 19.24 | 18.51 | 1.58E-21 | 8.03E-14 | 6.87E-14 | 8.65E-09 | 2.53E-01 | 1.81E-01 | 8.87E-04 |
| 274.95181 | 29.98  | 17.04 | 18.50 | 19.58 | 18.89 | 2.21E-43 | 7.28E-14 | 3.65E-14 | 3.70E-14 | 3.17E-11 | 5.10E-02 | 6.09E-05 |
| 274.9903  | 190.87 | 15.64 | 14.70 | 15.72 | 16.16 | 5.50E-02 | 2.53E-01 | 9.99E-01 | 7.58E-01 | 2.08E-01 | 3.69E-02 | 8.46E-01 |
| 275.00534 | 66.4   | 17.89 | 13.68 | 12.78 | 14.57 | 1.64E-30 | 6.41E-14 | 3.65E-14 | 1.27E-13 | 1.08E-01 | 1.37E-01 | 1.00E-04 |
| 275.01524 | 51     | 17.72 | 18.70 | 19.15 | 18.41 | 7.60E-28 | 7.45E-14 | 3.65E-14 | 3.04E-08 | 5.31E-04 | 6.66E-02 | 6.06E-09 |
| 275.01695 | 295.85 | 12.16 | 17.55 | 18.25 | 14.77 | 7.28E-42 | 3.65E-14 | 3.65E-14 | 1.35E-09 | 2.81E-01 | 4.36E-10 | 8.25E-14 |
| 275.0339  | 69.99  | 16.83 | 10.56 | 14.30 | 11.91 | 3.93E-27 | 3.74E-14 | 7.14E-06 | 7.52E-14 | 6.63E-11 | 6.31E-02 | 7.12E-05 |
| 275.09536 | 71.81  | 14.74 | 14.38 | 14.83 | 15.12 | 3.20E-01 | 7.68E-01 | 9.94E-01 | 7.54E-01 | 6.35E-01 | 2.41E-01 | 8.84E-01 |
| 275.13093 | 46.91  | 17.08 | 17.56 | 18.47 | 18.58 | 7.69E-11 | 1.64E-01 | 3.19E-08 | 8.01E-09 | 8.83E-04 | 2.47E-04 | 9.68E-01 |
| 275.15628 | 27.99  | 15.89 | 18.55 | 17.70 | 18.42 | 4.83E-51 | 3.65E-14 | 3.67E-14 | 3.65E-14 | 1.75E-07 | 8.43E-01 | 1.89E-05 |
| 275.16396 | 212.52 | 15.96 | 10.60 | 11.73 | 11.56 | 2.31E-22 | 6.87E-14 | 1.05E-13 | 9.90E-14 | 1.33E-01 | 2.80E-01 | 9.89E-01 |
| 275.17146 | 56.08  | 16.68 | 17.68 | 17.16 | 17.97 | 1.22E-07 | 5.69E-05 | 1.21E-01 | 2.08E-07 | 1.07E-01 | 5.86E-01 | 3.18E-03 |
| 275.20026 | 23.16  | 17.36 | 14.53 | 15.29 | 16.66 | 2.03E-41 | 3.65E-14 | 3.92E-14 | 7.40E-04 | 1.86E-04 | 4.65E-14 | 1.27E-11 |
| 275.20047 | 184.31 | 17.75 | 15.09 | 15.59 | 15.84 | 7.34E-28 | 3.72E-14 | 7.36E-14 | 8.29E-14 | 1.16E-01 | 6.15E-03 | 6.62E-01 |
| 275.20048 | 280.06 | 17.45 | 15.96 | 15.97 | 16.21 | 1.80E-11 | 1.92E-09 | 1.55E-09 | 1.32E-06 | 1.00E+00 | 7.27E-01 | 7.35E-01 |
| 275.48903 | 304.8  | 13.15 | 17.38 | 16.30 | 14.12 | 3.39E-46 | 3.65E-14 | 3.65E-14 | 7.92E-04 | 1.21E-04 | 3.67E-14 | 9.00E-14 |
| 275.56711 | 231.35 | 17.82 | 23.52 | 23.84 | 22.36 | 9.61E-32 | 3.87E-14 | 3.65E-14 | 7.38E-14 | 9.13E-01 | 9.43E-02 | 1.63E-02 |
| 275.63276 | 29.19  | 21.38 | 17.73 | 18.08 | 18.32 | 7.09E-68 | 3.65E-14 | 3.65E-14 | 3.65E-14 | 1.31E-01 | 2.58E-03 | 4.66E-01 |
| 275.64427 | 28.02  | 13.69 | 18.31 | 17.43 | 17.38 | 8.50E-52 | 3.65E-14 | 3.65E-14 | 3.65E-14 | 2.59E-03 | 1.74E-03 | 9.96E-01 |
| 275.86614 | 51.74  | 20.19 | 17.76 | 17.81 | 16.83 | 4.19E-23 | 1.70E-13 | 2.31E-13 | 5.67E-14 | 9.99E-01 | 1.62E-02 | 9.41E-03 |
| 275.87661 | 43.82  | 15.12 | 14.99 | 15.06 | 15.11 | 9.78E-01 | 9.76E-01 | 9.97E-01 | 1.00E+00 | 9.97E-01 | 9.86E-01 | 9.99E-01 |
| 275.92496 | 282.78 | 16.42 | 18.38 | 17.99 | 16.92 | 6.11E-20 | 7.49E-14 | 1.70E-12 | 8.20E-02 | 2.58E-01 | 8.02E-10 | 6.73E-06 |
| 275.93437 | 254.85 | 20.49 | 21.20 | 20.08 | 20.42 | 1.55E-02 | 1.63E-01 | 6.05E-01 | 9.96E-01 | 7.84E-03 | 1.33E-01 | 7.77E-01 |
| 275.95106 | 71.16  | 13.89 | 14.35 | 13.99 | 14.52 | 6.76E-01 | 8.44E-01 | 9.98E-01 | 7.02E-01 | 9.24E-01 | 9.93E-01 | 8.13E-01 |
| 275.96029 | 35.26  | 14.74 | 13.33 | 13.31 | 13.89 | 2.57E-07 | 3.09E-06 | 1.96E-06 | 1.47E-02 | 1.00E+00 | 2.09E-01 | 1.86E-01 |
| 276.00073 | 87.52  | 17.77 | 18.72 | 17.81 | 18.62 | 2.92E-05 | 6.32E-04 | 9.98E-01 | 4.06E-03 | 1.66E-03 | 9.78E-01 | 8.92E-03 |
| 276.0166  | 81.63  | 17.39 | 8.37  | 9.60  | 13.74 | 3.41E-45 | 3.65E-14 | 3.65E-14 | 9.99E-10 | 1.09E-01 | 7.41E-14 | 1.34E-11 |
| 276.06888 | 238.15 | 16.86 | 20.91 | 21.42 | 19.98 | 4.29E-25 | 7.49E-14 | 4.90E-14 | 9.08E-12 | 6.20E-01 | 1.32E-01 | 4.73E-03 |
| 276.08422 | 85.54  | 17.75 | 16.37 | 16.15 | 16.46 | 2.65E-06 | 1.54E-04 | 6.21E-06 | 7.24E-04 | 9.09E-01 | 9.93E-01 | 7.92E-01 |
| 276.09186 | 83.43  | 15.42 | 17.29 | 16.98 | 16.96 | 3.24E-21 | 7.41E-14 | 9.36E-14 | 3.19E-13 | 3.57E-01 | 3.24E-01 | 9.99E-01 |
| 276.10781 | 217.95 | 16.17 | 12.71 | 12.86 | 13.67 | 2.50E-11 | 7.29E-10 | 2.64E-09 | 2.12E-05 | 9.92E-01 | 2.88E-01 | 4.30E-01 |
| 276.11895 | 171.6  | 16.38 | 20.62 | 15.49 | 18.66 | 8.32E-12 | 2.95E-08 | 5.65E-01 | 8.49E-03 | 5.52E-11 | 4.26E-02 | 1.20E-04 |
| 276.12632 | 32.75  | 18.28 | 17.14 | 17.04 | 18.02 | 4.56E-12 | 3.20E-08 | 1.27E-09 | 5.56E-01 | 9.56E-01 | 7.47E-05 | 6.86E-06 |
| 276.13531 | 29.88  | 19.59 | 17.07 | 17.16 | 17.46 | 1.24E-29 | 3.94E-14 | 4.43E-14 | 7.47E-14 | 9.75E-01 | 2.94E-01 | 5.19E-01 |
| 276.14452 | 40.84  | 15.99 | 16.44 | 16.38 | 17.14 | 9.43E-02 | 7.36E-01 | 8.05E-01 | 5.40E-02 | 9.99E-01 | 4.31E-01 | 3.52E-01 |
| 276.15539 | 105.21 | 18.92 | 21.34 | 19.32 | 20.69 | 7.22E-21 | 7.43E-14 | 3.69E-01 | 1.67E-10 | 4.42E-13 | 6.64E-02 | 1.47E-06 |
| 276.16664 | 70.11  | 15.72 | 17.19 | 17.20 | 17.11 | 1.64E-07 | 5.91E-06 | 3.98E-06 | 3.23E-05 | 1.00E+00 | 9.95E-01 | 9.93E-01 |

|           |        |       |       |       |       |          |          |          |          |          |          |          |
|-----------|--------|-------|-------|-------|-------|----------|----------|----------|----------|----------|----------|----------|
| 276.18035 | 36.51  | 21.31 | 22.11 | 21.77 | 21.58 | 2.83E-07 | 6.73E-08 | 4.62E-03 | 2.10E-01 | 5.96E-02 | 1.47E-03 | 5.72E-01 |
| 276.19176 | 60.6   | 17.45 | 19.11 | 19.17 | 18.67 | 2.59E-38 | 3.65E-14 | 3.65E-14 | 7.41E-14 | 9.60E-01 | 3.04E-03 | 4.55E-04 |
| 276.19881 | 23.8   | 14.34 | 12.99 | 12.24 | 13.00 | 1.74E-06 | 2.90E-03 | 4.63E-07 | 4.19E-03 | 2.15E-01 | 1.00E+00 | 2.28E-01 |
| 276.40472 | 293.03 | 15.23 | 14.84 | 15.05 | 14.71 | 3.36E-02 | 1.46E-01 | 7.75E-01 | 3.18E-02 | 6.53E-01 | 9.13E-01 | 2.79E-01 |
| 276.56494 | 237.69 | 14.88 | 19.40 | 19.90 | 18.67 | 5.27E-27 | 7.05E-14 | 4.16E-14 | 8.47E-14 | 6.61E-01 | 3.91E-01 | 3.58E-02 |
| 276.56988 | 226.55 | 12.22 | 17.24 | 17.60 | 16.42 | 6.18E-35 | 3.67E-14 | 3.65E-14 | 7.13E-14 | 8.16E-01 | 1.96E-01 | 2.38E-02 |
| 276.57374 | 99.77  | 16.37 | 16.67 | 15.99 | 16.17 | 7.72E-02 | 6.68E-01 | 4.47E-01 | 8.69E-01 | 5.56E-02 | 2.69E-01 | 9.14E-01 |
| 276.58083 | 60.13  | 14.11 | 15.32 | 14.95 | 14.86 | 8.18E-03 | 4.49E-03 | 8.36E-02 | 1.69E-01 | 7.43E-01 | 6.23E-01 | 9.96E-01 |
| 276.63424 | 28.19  | 17.22 | 12.86 | 13.98 | 13.77 | 1.04E-48 | 3.65E-14 | 3.65E-14 | 3.65E-14 | 2.64E-05 | 1.71E-03 | 8.12E-01 |
| 276.65188 | 27.22  | 17.76 | 21.83 | 19.88 | 19.99 | 7.05E-30 | 3.65E-14 | 1.71E-11 | 9.37E-12 | 2.34E-09 | 4.97E-08 | 9.85E-01 |
| 276.7822  | 45.06  | 16.96 | 16.70 | 16.41 | 16.73 | 4.14E-03 | 3.15E-01 | 1.34E-03 | 4.19E-01 | 2.16E-01 | 9.99E-01 | 1.81E-01 |
| 276.78885 | 49.28  | 15.89 | 15.05 | 15.27 | 15.18 | 5.71E-03 | 5.74E-03 | 6.82E-02 | 3.61E-02 | 8.26E-01 | 9.57E-01 | 9.88E-01 |
| 276.84392 | 108.7  | 14.51 | 14.98 | 12.61 | 15.39 | 2.48E-25 | 1.82E-01 | 1.30E-13 | 1.54E-03 | 7.47E-14 | 3.40E-01 | 4.63E-14 |
| 276.87122 | 46.53  | 17.73 | 17.95 | 18.26 | 18.15 | 3.53E-03 | 4.83E-01 | 2.71E-03 | 3.99E-02 | 1.80E-01 | 6.00E-01 | 8.86E-01 |
| 276.87721 | 30.03  | 16.49 | 16.21 | 16.68 | 16.26 | 9.70E-02 | 5.02E-01 | 7.76E-01 | 6.97E-01 | 1.04E-01 | 9.93E-01 | 2.05E-01 |
| 276.90418 | 47.8   | 14.66 | 14.13 | 15.98 | 15.18 | 6.53E-14 | 7.43E-02 | 1.75E-08 | 8.39E-02 | 1.19E-13 | 4.14E-05 | 3.02E-03 |
| 276.92252 | 49.07  | 16.49 | 18.64 | 19.02 | 18.47 | 2.29E-53 | 3.65E-14 | 3.65E-14 | 3.65E-14 | 2.22E-02 | 6.14E-01 | 4.17E-04 |
| 276.93798 | 112.44 | 14.21 | 14.89 | 15.74 | 14.95 | 2.56E-04 | 1.94E-01 | 5.71E-05 | 1.52E-01 | 7.36E-02 | 9.98E-01 | 1.25E-01 |
| 276.94974 | 19.95  | 14.56 | 12.46 | 13.96 | 12.90 | 1.27E-16 | 7.74E-14 | 6.09E-02 | 7.62E-10 | 2.68E-08 | 3.19E-01 | 1.99E-04 |
| 276.9624  | 179.77 | 12.98 | 13.88 | 14.43 | 12.96 | 1.05E-02 | 2.88E-01 | 2.07E-02 | 1.00E+00 | 7.02E-01 | 3.14E-01 | 2.89E-02 |
| 277.04643 | 152.65 | 13.98 | 12.54 | 13.68 | 14.59 | 6.76E-06 | 7.73E-04 | 8.44E-01 | 3.93E-01 | 1.59E-02 | 2.71E-06 | 9.69E-02 |
| 277.06066 | 50.54  | 19.20 | 19.02 | 17.96 | 17.35 | 9.83E-20 | 7.61E-01 | 2.92E-09 | 7.43E-14 | 1.35E-06 | 2.35E-13 | 1.54E-02 |
| 277.06667 | 234.78 | 15.19 | 16.72 | 17.21 | 16.42 | 2.84E-19 | 4.86E-12 | 7.33E-14 | 5.78E-08 | 8.43E-02 | 4.99E-01 | 1.36E-03 |
| 277.08365 | 82.73  | 24.18 | 22.89 | 22.55 | 22.51 | 7.98E-09 | 6.81E-05 | 1.75E-07 | 2.71E-07 | 6.40E-01 | 5.94E-01 | 9.99E-01 |
| 277.08936 | 56.63  | 18.22 | 17.95 | 17.90 | 17.71 | 2.06E-03 | 1.58E-01 | 5.92E-02 | 8.40E-04 | 9.79E-01 | 2.92E-01 | 5.02E-01 |
| 277.10373 | 59.21  | 21.67 | 23.52 | 23.76 | 23.62 | 3.54E-21 | 9.48E-14 | 7.33E-14 | 7.68E-14 | 6.96E-01 | 9.67E-01 | 9.33E-01 |
| 277.116   | 67.86  | 16.53 | 17.29 | 16.93 | 17.30 | 6.28E-03 | 1.18E-02 | 3.50E-01 | 1.45E-02 | 4.87E-01 | 1.00E+00 | 5.01E-01 |
| 277.12228 | 97.81  | 19.16 | 20.51 | 20.79 | 20.60 | 1.29E-11 | 2.04E-07 | 1.69E-10 | 5.25E-08 | 6.30E-01 | 9.79E-01 | 8.69E-01 |
| 277.12979 | 31.75  | 18.71 | 17.34 | 17.24 | 17.77 | 3.88E-12 | 1.40E-09 | 5.07E-11 | 8.01E-05 | 9.61E-01 | 2.06E-01 | 6.93E-02 |
| 277.13922 | 128.64 | 14.66 | 15.55 | 15.87 | 15.87 | 5.55E-04 | 3.55E-02 | 1.35E-03 | 2.15E-03 | 7.72E-01 | 7.89E-01 | 1.00E+00 |
| 277.15799 | 124.83 | 16.25 | 17.69 | 17.81 | 17.18 | 6.42E-09 | 4.44E-07 | 3.32E-08 | 3.39E-03 | 9.73E-01 | 2.36E-01 | 9.51E-02 |
| 277.17965 | 287.78 | 18.89 | 17.48 | 17.49 | 17.55 | 7.92E-12 | 2.43E-09 | 2.65E-09 | 3.49E-08 | 1.00E+00 | 9.90E-01 | 9.95E-01 |
| 277.19508 | 58.82  | 14.79 | 14.74 | 15.01 | 14.54 | 2.00E-01 | 9.96E-01 | 6.91E-01 | 6.50E-01 | 5.73E-01 | 7.98E-01 | 1.34E-01 |
| 277.2158  | 24.44  | 18.78 | 16.78 | 17.22 | 18.30 | 5.48E-22 | 7.29E-14 | 3.15E-13 | 7.96E-02 | 1.35E-01 | 2.46E-11 | 1.80E-06 |
| 277.21604 | 159.78 | 18.99 | 17.53 | 17.83 | 17.72 | 2.15E-04 | 3.54E-04 | 6.76E-03 | 3.70E-03 | 8.42E-01 | 9.56E-01 | 9.92E-01 |
| 277.48207 | 306.44 | 14.75 | 17.07 | 15.25 | 14.33 | 4.94E-36 | 3.65E-14 | 2.46E-02 | 9.60E-02 | 7.47E-14 | 3.65E-14 | 8.43E-06 |
| 277.58524 | 80.7   | 21.74 | 20.12 | 19.80 | 19.78 | 9.41E-13 | 1.18E-07 | 1.16E-10 | 3.88E-10 | 6.56E-01 | 6.56E-01 | 1.00E+00 |
| 277.66681 | 55.04  | 15.38 | 15.98 | 17.19 | 16.33 | 2.60E-09 | 1.10E-01 | 4.40E-10 | 3.60E-03 | 9.35E-05 | 6.17E-01 | 1.25E-02 |
| 277.86232 | 41.34  | 19.50 | 16.54 | 16.40 | 15.17 | 3.01E-30 | 7.38E-14 | 7.36E-14 | 3.65E-14 | 9.73E-01 | 3.70E-04 | 1.61E-03 |
| 277.91798 | 95.68  | 17.41 | 17.37 | 17.02 | 18.17 | 6.42E-05 | 9.98E-01 | 3.18E-01 | 7.77E-03 | 4.39E-01 | 6.51E-03 | 1.95E-05 |
| 277.93882 | 113.25 | 12.53 | 14.27 | 14.50 | 13.66 | 1.70E-05 | 3.02E-04 | 2.49E-05 | 4.71E-02 | 9.51E-01 | 5.22E-01 | 2.31E-01 |
| 277.94994 | 95.59  | 20.44 | 21.13 | 21.87 | 20.79 | 9.95E-10 | 6.25E-03 | 3.33E-10 | 3.86E-01 | 3.71E-03 | 3.98E-01 | 8.75E-06 |
| 277.95    | 226.79 | 17.79 | 16.64 | 15.44 | 17.24 | 6.52E-06 | 5.98E-02 | 2.57E-06 | 6.41E-01 | 5.11E-02 | 6.05E-01 | 1.22E-03 |
| 277.96745 | 78.51  | 14.92 | 18.78 | 19.02 | 18.24 | 2.59E-30 | 4.50E-14 | 3.72E-14 | 7.36E-14 | 8.91E-01 | 4.32E-01 | 1.20E-01 |
| 278.0566  | 39.25  | 14.73 | 14.20 | 14.82 | 14.01 | 1.39E-01 | 5.26E-01 | 9.96E-01 | 2.84E-01 | 4.12E-01 | 9.71E-01 | 2.08E-01 |
| 278.0634  | 286.25 | 13.26 | 14.26 | 15.23 | 14.39 | 1.36E-03 | 1.78E-01 | 4.04E-04 | 1.15E-01 | 2.17E-01 | 9.94E-01 | 3.63E-01 |
| 278.0647  | 54.16  | 16.07 | 13.99 | 14.60 | 14.84 | 5.07E-05 | 2.15E-05 | 4.48E-03 | 3.36E-02 | 5.29E-01 | 2.61E-01 | 9.52E-01 |
| 278.07078 | 300.2  | 15.18 | 17.07 | 17.17 | 15.24 | 2.16E-15 | 1.52E-09 | 1.56E-10 | 9.98E-01 | 9.88E-01 | 3.00E-08 | 4.09E-09 |
| 278.08054 | 233.9  | 16.59 | 19.75 | 19.69 | 19.30 | 4.55E-24 | 7.29E-14 | 7.34E-14 | 8.33E-14 | 9.98E-01 | 5.17E-01 | 6.12E-01 |
| 278.08642 | 80.7   | 19.34 | 17.52 | 16.71 | 17.09 | 2.41E-15 | 1.01E-07 | 9.07E-14 | 1.44E-10 | 5.86E-02 | 5.69E-01 | 6.52E-01 |
| 278.09897 | 88.56  | 15.81 | 16.73 | 16.58 | 17.33 | 1.53E-09 | 1.29E-04 | 1.81E-03 | 2.56E-10 | 8.98E-01 | 4.47E-02 | 5.48E-03 |
| 278.10664 | 73.83  | 18.48 | 20.09 | 20.39 | 20.19 | 1.29E-16 | 8.48E-11 | 8.52E-14 | 1.63E-11 | 5.42E-01 | 9.70E-01 | 8.29E-01 |
| 278.12338 | 78.87  | 16.06 | 16.33 | 16.84 | 16.88 | 1.37E-02 | 7.88E-01 | 3.48E-02 | 3.21E-02 | 3.13E-01 | 2.81E-01 | 9.99E-01 |
| 278.14278 | 24.08  | 12.70 | 14.70 | 12.12 | 15.52 | 1.41E-16 | 3.99E-06 | 4.45E-01 | 1.67E-10 | 4.46E-09 | 2.04E-01 | 1.58E-13 |
| 278.15327 | 58.49  | 15.71 | 16.06 | 15.83 | 15.98 | 6.34E-01 | 6.14E-01 | 9.71E-01 | 7.93E-01 | 8.70E-01 | 9.94E-01 | 9.62E-01 |
| 278.17503 | 212.54 | 16.27 | 13.64 | 13.63 | 13.25 | 1.18E-10 | 1.78E-07 | 1.32E-07 | 4.98E-09 | 1.00E+00 | 8.58E-01 | 8.56E-01 |
| 278.18315 | 208.96 | 15.94 | 12.80 | 13.04 | 13.53 | 1.75E-12 | 5.36E-11 | 9.00E-10 | 1.04E-06 | 9.50E-01 | 3.95E-01 | 7.10E-01 |
| 278.21921 | 24.16  | 16.83 | 13.29 | 14.49 | 15.63 | 4.44E-30 | 3.65E-14 | 7.36E-14 | 7.73E-05 | 7.34E-05 | 1.00E-13 | 2.65E-04 |
| 278.21952 | 172.29 | 16.95 | 14.72 | 14.55 | 15.18 | 7.22E-32 | 3.87E-14 | 3.65E-14 | 7.45E-14 | 8.22E-01 | 8.99E-02 | 8.08E-03 |
| 278.54682 | 287.73 | 12.67 | 17.50 | 15.83 | 16.55 | 2.76E-24 | 4.65E-14 | 5.24E-12 | 7.47E-14 | 8.23E-04 | 1.48E-01 | 3.64E-01 |
| 278.57228 | 258.69 | 19.88 | 22.32 | 23.63 | 22.64 | 5.05E-30 | 7.96E-14 | 3.65E-14 | 7.52E-14 | 4.24E-05 | 6.87E-01 | 4.86E-03 |
| 278.58231 | 218.32 | 14.89 | 16.59 | 16.34 | 16.34 | 2.05E-08 | 1.34E-07 | 6.95E-06 | 1.45E-05 | 8.40E-01 | 8.59E-01 | 1.00E+00 |
| 278.60946 | 24.36  | 16.85 | 12.16 | 12.66 | 13.01 | 2.17E-82 | 3.65E-14 | 3.65E-14 | 3.65E-14 | 1.73E-02 | 1.04E-05 | 1.71E-01 |
| 278.6277  | 29.38  | 17.72 | 13.32 | 13.76 | 14.46 | 3.88E-61 | 3.65E-14 | 3.65E-14 | 3.65E-14 | 1.50E-01 | 1.69E-06 | 6.70E-03 |
| 278.639   | 27.48  | 16.66 | 20.28 | 19.18 | 19.90 | 3.79E-39 | 3.65E-14 | 6.52E-14 | 3.65E-14 | 4.70E-05 | 4.18E-01 | 2.04E-02 |
| 278.88083 | 107.54 | 15.05 | 17.57 | 13.96 | 17.46 | 4.60E-18 | 3.86E-08 | 4.28E-02 | 3.37E-07 | 9.85E-14 | 9.94E-01 | 5.08E-13 |
| 278.89307 | 34.48  | 16.88 | 13.14 | 16.37 | 14.55 | 5.24E-18 | 7.27E-14 | 5.98E-01 | 4.27E-07 | 1.89E-12 | 6.75E-03 | 1.67E-04 |
| 278.91981 | 48.07  | 15.00 | 16.75 | 17.19 | 16.66 | 1.49E-25 | 7.34E-14 | 4.19E-14 | 8.52E-14 | 1.14E-01 | 9.63E-01 | 3.95E-02 |

|           |        |       |       |       |       |          |          |          |          |          |          |          |
|-----------|--------|-------|-------|-------|-------|----------|----------|----------|----------|----------|----------|----------|
| 278.95336 | 98.75  | 15.40 | 13.69 | 14.61 | 14.29 | 3.82E-07 | 8.89E-08 | 3.21E-02 | 1.43E-03 | 1.24E-02 | 2.11E-01 | 7.27E-01 |
| 278.96297 | 65.8   | 15.82 | 16.69 | 16.40 | 16.69 | 3.70E-04 | 9.62E-04 | 5.02E-02 | 1.40E-03 | 6.06E-01 | 1.00E+00 | 6.27E-01 |
| 278.99565 | 166.06 | 17.48 | 16.98 | 16.74 | 16.53 | 6.71E-03 | 2.78E-01 | 3.80E-02 | 5.38E-03 | 8.31E-01 | 4.15E-01 | 8.87E-01 |
| 279.01509 | 96.65  | 15.90 | 12.80 | 15.55 | 14.08 | 2.14E-16 | 8.06E-14 | 7.62E-01 | 8.49E-06 | 7.72E-12 | 4.49E-03 | 6.73E-04 |
| 279.02496 | 101.63 | 16.69 | 14.18 | 13.59 | 14.87 | 3.20E-17 | 1.14E-11 | 7.32E-14 | 2.00E-06 | 3.17E-01 | 2.10E-01 | 1.91E-03 |
| 279.03504 | 49.21  | 18.13 | 16.97 | 17.69 | 17.21 | 5.78E-04 | 5.50E-04 | 4.24E-01 | 1.24E-02 | 7.89E-02 | 8.69E-01 | 3.97E-01 |
| 279.04718 | 44.87  | 16.67 | 17.65 | 16.02 | 17.88 | 2.17E-12 | 6.56E-04 | 4.79E-02 | 2.39E-05 | 7.02E-09 | 8.19E-01 | 1.14E-10 |
| 279.06467 | 103.26 | 16.00 | 19.15 | 19.19 | 18.44 | 2.04E-26 | 6.10E-14 | 5.34E-14 | 1.68E-13 | 9.99E-01 | 9.61E-02 | 6.31E-02 |
| 279.0741  | 251.93 | 19.71 | 22.89 | 23.91 | 22.50 | 1.92E-28 | 7.38E-14 | 3.65E-14 | 1.38E-13 | 1.37E-02 | 6.87E-01 | 3.54E-04 |
| 279.07994 | 51.8   | 19.93 | 18.58 | 19.01 | 19.01 | 2.91E-06 | 1.30E-06 | 1.56E-03 | 2.64E-03 | 3.53E-01 | 3.73E-01 | 1.00E+00 |
| 279.0931  | 278.63 | 17.23 | 16.19 | 16.15 | 16.14 | 5.22E-10 | 2.41E-07 | 6.67E-08 | 1.35E-07 | 9.98E-01 | 9.94E-01 | 1.00E+00 |
| 279.09319 | 180.9  | 17.81 | 15.84 | 16.27 | 16.22 | 1.91E-19 | 7.59E-14 | 2.98E-12 | 3.99E-12 | 1.56E-01 | 2.67E-01 | 9.96E-01 |
| 279.10908 | 56.11  | 17.44 | 18.24 | 17.86 | 18.39 | 4.85E-08 | 7.58E-06 | 4.13E-02 | 1.51E-07 | 1.04E-01 | 8.06E-01 | 1.03E-02 |
| 279.13403 | 40.69  | 17.61 | 14.80 | 14.54 | 15.36 | 7.92E-13 | 7.48E-10 | 1.35E-11 | 1.89E-06 | 9.33E-01 | 5.84E-01 | 2.48E-01 |
| 279.14075 | 27.84  | 14.09 | 18.34 | 17.54 | 17.91 | 2.16E-63 | 3.65E-14 | 3.65E-14 | 3.65E-14 | 3.66E-04 | 1.58E-01 | 2.45E-01 |
| 279.15875 | 23.14  | 18.09 | 16.66 | 16.61 | 16.65 | 1.20E-16 | 2.15E-12 | 3.83E-13 | 5.22E-12 | 9.96E-01 | 1.00E+00 | 9.98E-01 |
| 279.1589  | 282.73 | 19.60 | 18.87 | 18.49 | 18.55 | 3.24E-02 | 3.02E-01 | 3.78E-02 | 6.86E-02 | 8.05E-01 | 8.82E-01 | 9.99E-01 |
| 279.159   | 153.5  | 19.05 | 18.65 | 18.69 | 18.34 | 1.48E-01 | 5.37E-01 | 6.04E-01 | 9.43E-02 | 9.99E-01 | 7.55E-01 | 6.83E-01 |
| 279.17005 | 25.72  | 16.79 | 16.51 | 16.13 | 17.08 | 4.17E-03 | 6.81E-01 | 4.64E-02 | 6.92E-01 | 4.74E-01 | 1.51E-01 | 2.72E-03 |
| 279.19188 | 49.61  | 17.41 | 16.79 | 17.41 | 17.51 | 2.61E-02 | 6.66E-02 | 1.00E+00 | 9.79E-01 | 8.02E-02 | 3.50E-02 | 9.77E-01 |
| 279.1954  | 229.37 | 16.53 | 14.69 | 14.19 | 14.96 | 6.96E-14 | 5.37E-09 | 1.80E-13 | 1.33E-06 | 3.28E-01 | 8.22E-01 | 5.84E-02 |
| 279.23144 | 24.38  | 20.39 | 18.77 | 19.25 | 20.08 | 3.58E-18 | 7.61E-14 | 2.12E-09 | 2.99E-01 | 4.04E-02 | 1.52E-10 | 6.86E-05 |
| 279.23173 | 186.09 | 20.82 | 18.97 | 18.68 | 19.56 | 1.07E-05 | 2.62E-04 | 1.37E-05 | 3.04E-02 | 9.23E-01 | 6.01E-01 | 2.46E-01 |
| 279.57008 | 253.19 | 13.62 | 17.76 | 19.08 | 18.18 | 2.51E-27 | 7.51E-14 | 3.83E-14 | 7.47E-14 | 2.51E-02 | 8.20E-01 | 2.34E-01 |
| 279.57559 | 261.93 | 17.29 | 20.03 | 21.02 | 19.85 | 2.62E-37 | 4.81E-14 | 3.65E-14 | 7.14E-14 | 4.38E-04 | 9.00E-01 | 3.64E-05 |
| 279.59087 | 60.51  | 16.89 | 16.95 | 17.45 | 17.09 | 1.31E-01 | 9.95E-01 | 1.18E-01 | 8.74E-01 | 2.18E-01 | 9.56E-01 | 5.21E-01 |
| 279.64687 | 27.06  | 20.72 | 25.59 | 24.47 | 24.96 | 5.54E-57 | 3.65E-14 | 3.65E-14 | 3.65E-14 | 3.65E-05 | 5.81E-02 | 2.04E-01 |
| 279.68603 | 55.86  | 18.23 | 18.06 | 17.96 | 17.69 | 2.73E-01 | 9.28E-01 | 7.36E-01 | 2.05E-01 | 9.79E-01 | 5.47E-01 | 7.75E-01 |
| 279.86142 | 48.76  | 16.60 | 11.64 | 12.19 | 12.62 | 2.82E-44 | 3.65E-14 | 3.65E-14 | 3.65E-14 | 2.74E-01 | 1.22E-02 | 5.32E-01 |
| 279.92751 | 118.45 | 13.13 | 14.44 | 15.41 | 14.64 | 1.09E-08 | 1.36E-03 | 2.22E-09 | 2.28E-04 | 3.71E-02 | 9.49E-01 | 1.60E-01 |
| 279.95632 | 107.35 | 16.66 | 19.65 | 18.37 | 18.44 | 1.91E-15 | 7.48E-14 | 1.66E-06 | 1.37E-06 | 8.63E-04 | 2.99E-03 | 9.96E-01 |
| 279.96447 | 68.13  | 13.75 | 15.83 | 14.48 | 15.71 | 5.15E-06 | 2.98E-05 | 3.39E-01 | 1.54E-04 | 1.86E-02 | 9.94E-01 | 4.67E-02 |
| 280.0102  | 281.01 | 14.28 | 16.87 | 16.42 | 16.21 | 4.90E-09 | 1.31E-08 | 2.53E-06 | 5.41E-05 | 7.19E-01 | 4.44E-01 | 9.64E-01 |
| 280.04417 | 56.77  | 14.41 | 15.03 | 13.84 | 16.48 | 7.93E-06 | 5.97E-01 | 6.43E-01 | 3.43E-04 | 8.90E-02 | 2.90E-02 | 4.11E-06 |
| 280.06729 | 107.46 | 13.25 | 16.93 | 15.01 | 15.50 | 6.65E-12 | 8.08E-13 | 9.77E-04 | 2.66E-05 | 4.52E-04 | 2.05E-02 | 7.55E-01 |
| 280.07186 | 255.54 | 15.39 | 18.68 | 19.70 | 18.52 | 4.75E-26 | 7.46E-14 | 3.87E-14 | 1.01E-13 | 3.23E-02 | 9.71E-01 | 1.06E-02 |
| 280.08102 | 47.64  | 19.52 | 20.43 | 20.65 | 20.37 | 2.27E-06 | 2.76E-04 | 2.74E-06 | 1.16E-03 | 7.64E-01 | 9.94E-01 | 6.21E-01 |
| 280.09194 | 78.87  | 25.34 | 26.46 | 25.79 | 25.90 | 1.32E-08 | 1.49E-09 | 4.29E-02 | 7.67E-03 | 6.87E-04 | 1.06E-02 | 9.11E-01 |
| 280.14857 | 28.73  | 18.91 | 23.79 | 22.64 | 23.00 | 7.29E-56 | 3.65E-14 | 3.65E-14 | 3.65E-14 | 2.42E-05 | 1.08E-02 | 4.64E-01 |
| 280.15398 | 25.4   | 16.97 | 14.11 | 15.95 | 16.92 | 2.64E-08 | 9.78E-08 | 1.55E-01 | 1.00E+00 | 1.60E-03 | 7.98E-07 | 2.32E-01 |
| 280.16206 | 23.49  | 15.77 | 12.42 | 12.45 | 12.48 | 6.30E-19 | 8.76E-14 | 8.84E-14 | 2.09E-13 | 1.00E+00 | 9.99E-01 | 1.00E+00 |
| 280.16224 | 266.25 | 17.10 | 15.17 | 14.80 | 15.28 | 2.64E-13 | 4.65E-09 | 2.34E-12 | 7.22E-08 | 6.30E-01 | 9.87E-01 | 4.38E-01 |
| 280.17138 | 46.01  | 18.17 | 20.57 | 21.57 | 19.93 | 4.85E-37 | 5.67E-14 | 3.65E-14 | 6.54E-13 | 6.78E-05 | 2.88E-02 | 5.76E-11 |
| 280.18846 | 44.28  | 15.38 | 15.67 | 14.59 | 15.26 | 5.41E-02 | 8.78E-01 | 1.73E-01 | 9.90E-01 | 3.62E-02 | 7.47E-01 | 3.63E-01 |
| 280.19057 | 192.04 | 17.46 | 11.68 | 12.56 | 14.11 | 9.91E-28 | 3.74E-14 | 6.89E-14 | 2.47E-10 | 2.61E-01 | 1.20E-05 | 1.04E-02 |
| 280.23484 | 288.22 | 19.21 | 17.75 | 17.70 | 17.70 | 1.26E-08 | 2.14E-06 | 6.96E-07 | 1.63E-06 | 9.98E-01 | 9.98E-01 | 1.00E+00 |
| 280.23487 | 23.41  | 18.10 | 15.79 | 16.49 | 17.61 | 4.92E-26 | 4.19E-14 | 1.86E-13 | 7.08E-02 | 3.25E-03 | 8.07E-14 | 1.30E-06 |
| 280.23515 | 162.21 | 18.69 | 17.80 | 17.71 | 18.03 | 5.82E-07 | 1.92E-05 | 1.45E-06 | 4.08E-03 | 9.61E-01 | 6.32E-01 | 3.36E-01 |
| 280.26322 | 22.61  | 19.49 | 19.03 | 18.84 | 18.95 | 7.07E-05 | 1.15E-02 | 6.81E-05 | 2.13E-03 | 5.57E-01 | 9.41E-01 | 8.95E-01 |
| 280.65002 | 27.43  | 16.20 | 19.53 | 19.03 | 19.59 | 1.26E-25 | 6.83E-14 | 7.52E-14 | 6.92E-14 | 4.02E-01 | 9.98E-01 | 3.20E-01 |
| 280.65469 | 29.96  | 20.06 | 24.65 | 23.41 | 23.95 | 8.96E-62 | 3.65E-14 | 3.65E-14 | 3.65E-14 | 6.17E-08 | 6.58E-03 | 6.29E-02 |
| 280.67265 | 36.76  | 15.80 | 17.52 | 19.86 | 17.81 | 1.68E-24 | 2.87E-06 | 3.72E-14 | 8.21E-08 | 3.74E-10 | 8.46E-01 | 8.85E-08 |
| 280.81835 | 44.61  | 21.38 | 22.69 | 22.56 | 22.21 | 2.17E-11 | 1.82E-10 | 7.11E-09 | 1.44E-04 | 9.01E-01 | 7.40E-02 | 2.85E-01 |
| 280.82625 | 48.09  | 16.59 | 18.00 | 18.10 | 17.74 | 1.06E-09 | 1.32E-07 | 1.06E-08 | 4.13E-05 | 9.77E-01 | 7.37E-01 | 4.85E-01 |
| 280.8898  | 30.02  | 16.02 | 10.70 | 11.72 | 12.04 | 2.42E-41 | 3.65E-14 | 3.65E-14 | 4.03E-14 | 1.35E-02 | 8.25E-04 | 7.92E-01 |
| 280.96054 | 305.5  | 11.24 | 14.41 | 14.74 | 12.70 | 1.47E-30 | 4.94E-14 | 3.67E-14 | 4.72E-06 | 6.58E-01 | 1.41E-07 | 2.23E-10 |
| 280.96155 | 49.56  | 14.81 | 14.41 | 15.62 | 15.83 | 2.49E-07 | 3.98E-01 | 1.00E-02 | 9.80E-04 | 4.61E-05 | 2.85E-06 | 8.70E-01 |
| 280.9863  | 56.61  | 16.36 | 16.40 | 17.33 | 17.08 | 7.60E-07 | 9.98E-01 | 1.29E-05 | 3.11E-03 | 5.83E-05 | 7.98E-03 | 6.49E-01 |
| 281.01158 | 49.59  | 20.43 | 21.11 | 21.23 | 21.21 | 2.20E-19 | 3.52E-12 | 7.25E-14 | 8.72E-14 | 4.92E-01 | 7.16E-01 | 9.89E-01 |
| 281.02916 | 61.26  | 16.25 | 15.19 | 15.68 | 16.64 | 4.62E-03 | 4.46E-02 | 4.82E-01 | 7.78E-01 | 6.36E-01 | 4.33E-03 | 1.07E-01 |
| 281.05078 | 24.14  | 16.64 | 14.81 | 15.62 | 16.03 | 1.87E-09 | 3.76E-10 | 7.65E-04 | 1.14E-01 | 1.83E-02 | 1.40E-04 | 4.55E-01 |
| 281.05139 | 138.53 | 16.31 | 14.14 | 14.60 | 15.07 | 2.33E-10 | 2.48E-10 | 5.46E-07 | 8.22E-04 | 4.78E-01 | 2.75E-02 | 4.81E-01 |
| 281.07053 | 87.89  | 19.15 | 16.26 | 17.19 | 16.84 | 2.61E-22 | 6.29E-14 | 1.11E-11 | 9.87E-14 | 4.71E-03 | 1.69E-01 | 6.15E-01 |
| 281.08802 | 64.25  | 17.29 | 17.06 | 16.87 | 16.90 | 1.51E-01 | 6.55E-01 | 1.53E-01 | 2.44E-01 | 7.98E-01 | 8.88E-01 | 9.98E-01 |
| 281.09534 | 81.05  | 21.60 | 23.03 | 22.27 | 22.16 | 3.45E-12 | 3.07E-13 | 8.59E-04 | 1.10E-02 | 2.52E-04 | 3.83E-05 | 9.35E-01 |
| 281.11101 | 51.38  | 17.16 | 13.33 | 13.57 | 14.18 | 1.55E-38 | 3.65E-14 | 3.65E-14 | 5.65E-14 | 8.04E-01 | 1.21E-02 | 1.17E-01 |
| 281.15031 | 28.67  | 17.55 | 17.01 | 16.88 | 17.24 | 2.13E-02 | 8.88E-02 | 1.72E-02 | 5.52E-01 | 9.40E-01 | 7.80E-01 | 4.31E-01 |
| 281.15643 | 28.88  | 18.41 | 22.84 | 21.55 | 21.81 | 3.77E-41 | 3.65E-14 | 4.03E-14 | 3.72E-14 | 2.56E-05 | 1.96E-03 | 7.88E-01 |

|           |        |       |       |       |       |          |          |          |          |          |          |          |
|-----------|--------|-------|-------|-------|-------|----------|----------|----------|----------|----------|----------|----------|
| 281.16898 | 35.91  | 15.75 | 16.31 | 18.14 | 16.46 | 3.01E-10 | 3.59E-01 | 1.30E-10 | 1.86E-01 | 2.39E-06 | 9.77E-01 | 2.84E-05 |
| 281.17431 | 24.33  | 17.23 | 14.40 | 17.14 | 14.98 | 1.60E-13 | 2.42E-10 | 9.95E-01 | 1.04E-06 | 2.27E-09 | 5.43E-01 | 5.40E-06 |
| 281.17471 | 182.31 | 16.97 | 13.14 | 14.56 | 13.97 | 1.04E-19 | 7.18E-14 | 4.13E-09 | 1.84E-12 | 1.62E-03 | 1.66E-01 | 4.35E-01 |
| 281.2109  | 21.44  | 16.57 | 12.59 | 13.62 | 14.81 | 3.52E-34 | 3.65E-14 | 6.05E-14 | 9.40E-09 | 1.41E-03 | 2.22E-12 | 2.55E-04 |
| 281.21101 | 162.62 | 17.22 | 14.33 | 14.36 | 15.37 | 1.46E-28 | 4.19E-14 | 4.19E-14 | 3.00E-11 | 9.99E-01 | 4.86E-04 | 6.58E-04 |
| 281.26659 | 23.05  | 17.06 | 15.75 | 15.59 | 16.08 | 1.51E-17 | 3.99E-13 | 7.48E-14 | 9.58E-08 | 7.84E-01 | 2.29E-01 | 2.54E-02 |
| 281.48136 | 89.73  | 15.24 | 15.47 | 16.04 | 15.14 | 3.73E-03 | 8.03E-01 | 9.53E-03 | 9.81E-01 | 1.32E-01 | 6.15E-01 | 5.12E-03 |
| 281.49478 | 88.88  | 15.56 | 16.66 | 16.35 | 15.92 | 4.57E-04 | 3.62E-04 | 1.71E-02 | 5.62E-01 | 6.85E-01 | 4.96E-02 | 4.20E-01 |
| 281.64303 | 27.45  | 15.96 | 19.87 | 18.64 | 19.30 | 2.04E-47 | 3.65E-14 | 3.70E-14 | 3.65E-14 | 4.57E-07 | 6.61E-02 | 1.97E-02 |
| 281.66247 | 31     | 20.71 | 25.85 | 24.97 | 25.06 | 1.90E-61 | 3.65E-14 | 3.65E-14 | 3.65E-14 | 1.75E-03 | 9.14E-03 | 9.82E-01 |
| 281.82178 | 44.81  | 16.15 | 16.57 | 16.21 | 16.51 | 1.08E-03 | 4.38E-03 | 9.59E-01 | 2.14E-02 | 2.53E-02 | 9.77E-01 | 8.79E-02 |
| 281.94513 | 40.02  | 17.00 | 16.07 | 16.11 | 16.00 | 2.26E-10 | 9.11E-08 | 2.19E-07 | 1.99E-08 | 9.96E-01 | 9.74E-01 | 9.19E-01 |
| 281.95977 | 43.4   | 15.59 | 15.70 | 16.10 | 16.27 | 4.48E-02 | 9.77E-01 | 2.12E-01 | 6.35E-02 | 4.51E-01 | 1.80E-01 | 9.31E-01 |
| 281.99759 | 55.78  | 18.26 | 18.74 | 18.96 | 17.94 | 5.44E-06 | 7.39E-02 | 2.61E-03 | 4.04E-01 | 7.14E-01 | 1.03E-03 | 1.22E-05 |
| 282.01223 | 43.67  | 16.71 | 17.08 | 17.23 | 17.43 | 3.18E-05 | 5.53E-02 | 2.51E-03 | 1.66E-05 | 7.74E-01 | 1.12E-01 | 5.40E-01 |
| 282.04866 | 46.93  | 22.28 | 21.38 | 21.72 | 21.64 | 1.82E-07 | 7.24E-08 | 1.34E-03 | 3.28E-04 | 1.36E-01 | 3.74E-01 | 9.62E-01 |
| 282.09625 | 76.41  | 18.17 | 19.75 | 18.85 | 18.71 | 1.14E-06 | 1.96E-07 | 6.35E-02 | 2.37E-01 | 9.03E-03 | 2.34E-03 | 9.56E-01 |
| 282.11184 | 87     | 16.12 | 17.46 | 17.36 | 16.88 | 2.71E-10 | 2.92E-09 | 2.78E-08 | 2.17E-03 | 9.68E-01 | 4.17E-02 | 1.18E-01 |
| 282.11831 | 112.47 | 18.45 | 19.42 | 19.48 | 19.05 | 2.13E-23 | 7.27E-14 | 6.81E-14 | 4.74E-08 | 9.37E-01 | 2.53E-03 | 2.62E-04 |
| 282.14563 | 27.86  | 13.20 | 17.70 | 16.77 | 17.34 | 6.32E-19 | 7.37E-14 | 1.73E-11 | 1.46E-13 | 2.48E-01 | 9.01E-01 | 6.78E-01 |
| 282.16423 | 33.52  | 18.76 | 24.06 | 23.16 | 23.21 | 9.46E-68 | 3.65E-14 | 3.65E-14 | 3.65E-14 | 5.40E-04 | 1.97E-03 | 9.96E-01 |
| 282.20644 | 158.98 | 17.79 | 14.63 | 14.14 | 15.94 | 4.20E-31 | 5.01E-14 | 3.65E-14 | 3.87E-09 | 3.13E-01 | 8.49E-05 | 2.07E-08 |
| 282.22129 | 288.14 | 19.28 | 20.02 | 20.00 | 19.76 | 1.74E-01 | 2.06E-01 | 2.19E-01 | 6.05E-01 | 1.00E+00 | 9.14E-01 | 9.28E-01 |
| 282.2216  | 144.29 | 19.68 | 19.06 | 19.57 | 19.25 | 1.06E-01 | 1.08E-01 | 9.73E-01 | 4.28E-01 | 2.74E-01 | 9.07E-01 | 7.02E-01 |
| 282.25053 | 22.2   | 17.62 | 14.07 | 14.82 | 15.53 | 4.08E-60 | 3.65E-14 | 3.65E-14 | 3.65E-14 | 2.92E-05 | 7.66E-14 | 1.37E-04 |
| 282.25056 | 290.9  | 18.60 | 17.80 | 17.88 | 17.80 | 3.51E-02 | 6.48E-02 | 1.06E-01 | 7.68E-02 | 9.96E-01 | 1.00E+00 | 9.97E-01 |
| 282.27887 | 21.93  | 20.20 | 18.97 | 18.90 | 19.33 | 4.11E-25 | 7.27E-14 | 5.67E-14 | 6.94E-11 | 9.39E-01 | 2.22E-02 | 3.44E-03 |
| 282.27903 | 156.73 | 18.43 | 19.71 | 19.98 | 18.24 | 8.40E-10 | 1.13E-04 | 1.35E-06 | 9.23E-01 | 8.03E-01 | 2.35E-05 | 2.87E-07 |
| 282.47955 | 193.8  | 15.12 | 15.41 | 15.87 | 14.74 | 1.27E-01 | 9.20E-01 | 3.55E-01 | 8.55E-01 | 7.66E-01 | 5.17E-01 | 9.35E-02 |
| 282.57298 | 85.27  | 16.73 | 15.92 | 16.43 | 16.27 | 1.16E-02 | 5.25E-03 | 5.91E-01 | 2.53E-01 | 1.72E-01 | 5.20E-01 | 9.25E-01 |
| 282.62336 | 26.98  | 16.64 | 20.19 | 19.33 | 19.48 | 4.10E-35 | 3.65E-14 | 5.67E-14 | 5.07E-14 | 4.35E-03 | 3.61E-02 | 9.36E-01 |
| 282.63424 | 32.3   | 14.53 | 15.28 | 18.61 | 17.22 | 4.52E-13 | 5.07E-01 | 2.79E-12 | 1.15E-05 | 2.98E-08 | 4.02E-03 | 6.54E-02 |
| 282.65095 | 27.13  | 13.69 | 18.82 | 17.65 | 17.94 | 2.56E-48 | 3.65E-14 | 3.65E-14 | 3.65E-14 | 3.99E-04 | 1.80E-02 | 7.63E-01 |
| 282.66059 | 27.83  | 15.59 | 16.88 | 16.62 | 17.26 | 1.67E-10 | 6.40E-07 | 7.77E-05 | 2.27E-10 | 7.17E-01 | 4.05E-01 | 4.85E-02 |
| 282.66563 | 29.77  | 16.95 | 21.31 | 20.40 | 20.42 | 2.44E-44 | 3.65E-14 | 3.65E-14 | 3.65E-14 | 3.08E-03 | 5.79E-03 | 1.00E+00 |
| 282.67888 | 26.35  | 15.57 | 13.34 | 17.43 | 13.84 | 4.46E-27 | 1.18E-09 | 3.68E-07 | 5.54E-06 | 3.92E-14 | 4.94E-01 | 7.38E-14 |
| 282.81593 | 44.58  | 20.51 | 21.88 | 21.75 | 21.45 | 2.04E-13 | 3.67E-12 | 2.11E-10 | 3.51E-06 | 8.86E-01 | 1.16E-01 | 4.09E-01 |
| 282.82333 | 48.09  | 16.86 | 18.25 | 18.26 | 18.15 | 1.01E-14 | 1.43E-11 | 7.23E-12 | 9.73E-10 | 1.00E+00 | 9.56E-01 | 9.45E-01 |
| 282.86825 | 47.68  | 15.81 | 15.59 | 16.46 | 15.56 | 5.04E-03 | 8.44E-01 | 7.79E-02 | 7.97E-01 | 1.04E-02 | 1.00E+00 | 9.40E-03 |
| 282.93583 | 293.18 | 16.13 | 15.66 | 15.52 | 16.57 | 2.04E-03 | 3.50E-01 | 1.27E-01 | 4.24E-01 | 9.57E-01 | 1.39E-02 | 2.51E-03 |
| 282.96346 | 27.41  | 15.17 | 16.30 | 15.49 | 15.81 | 1.80E-04 | 7.90E-05 | 5.93E-01 | 7.40E-02 | 1.05E-02 | 2.54E-01 | 6.31E-01 |
| 282.97308 | 79.35  | 17.62 | 17.73 | 17.95 | 17.26 | 3.03E-02 | 9.62E-01 | 4.23E-01 | 3.79E-01 | 7.48E-01 | 1.87E-01 | 1.55E-02 |
| 282.99978 | 117.52 | 18.10 | 17.99 | 18.72 | 18.29 | 3.42E-03 | 9.55E-01 | 1.24E-02 | 8.02E-01 | 3.33E-03 | 5.22E-01 | 1.84E-01 |
| 283.00694 | 49.4   | 16.94 | 17.71 | 17.75 | 17.87 | 8.00E-10 | 1.79E-06 | 3.83E-07 | 1.48E-08 | 9.94E-01 | 7.28E-01 | 8.55E-01 |
| 283.01359 | 40.13  | 17.69 | 12.50 | 13.05 | 13.25 | 2.45E-89 | 3.65E-14 | 3.65E-14 | 3.65E-14 | 6.95E-03 | 1.56E-04 | 6.63E-01 |
| 283.01869 | 258.03 | 21.22 | 21.92 | 22.34 | 22.18 | 3.97E-05 | 2.53E-02 | 4.05E-05 | 1.00E-03 | 3.35E-01 | 7.39E-01 | 9.27E-01 |
| 283.02648 | 32.54  | 15.76 | 13.75 | 15.08 | 14.66 | 8.98E-09 | 1.72E-09 | 1.12E-01 | 2.99E-03 | 1.70E-04 | 2.56E-02 | 5.60E-01 |
| 283.0372  | 216.03 | 12.82 | 13.66 | 15.85 | 15.35 | 1.42E-05 | 5.75E-01 | 3.68E-05 | 1.39E-03 | 7.86E-03 | 7.95E-02 | 8.88E-01 |
| 283.04553 | 97.07  | 19.26 | 22.96 | 22.79 | 21.78 | 1.52E-40 | 3.65E-14 | 3.65E-14 | 7.27E-14 | 9.00E-01 | 4.15E-05 | 5.68E-04 |
| 283.05189 | 46.87  | 18.76 | 17.31 | 17.55 | 17.63 | 6.65E-13 | 5.61E-12 | 6.85E-09 | 1.58E-07 | 5.94E-01 | 4.00E-01 | 9.84E-01 |
| 283.06889 | 95.41  | 15.52 | 14.86 | 14.62 | 13.09 | 8.56E-08 | 3.13E-01 | 8.33E-02 | 1.72E-08 | 9.25E-01 | 1.11E-04 | 1.05E-03 |
| 283.12167 | 107.99 | 15.39 | 14.83 | 13.41 | 14.44 | 7.39E-11 | 1.62E-01 | 1.56E-11 | 3.80E-03 | 3.66E-06 | 5.19E-01 | 2.00E-03 |
| 283.12515 | 34.57  | 16.21 | 18.32 | 17.92 | 18.44 | 3.52E-26 | 6.61E-14 | 7.76E-14 | 5.85E-14 | 1.90E-01 | 9.43E-01 | 5.93E-02 |
| 283.13588 | 33.29  | 12.64 | 12.61 | 16.04 | 15.10 | 7.05E-12 | 1.00E+00 | 2.80E-09 | 5.02E-05 | 6.48E-09 | 7.05E-05 | 3.28E-01 |
| 283.15265 | 28.91  | 14.50 | 14.42 | 12.70 | 15.13 | 1.77E-02 | 1.00E+00 | 8.26E-02 | 8.46E-01 | 1.23E-01 | 8.12E-01 | 1.36E-02 |
| 283.16376 | 43.7   | 17.79 | 19.50 | 18.81 | 19.42 | 6.11E-15 | 3.82E-13 | 1.22E-05 | 8.48E-12 | 1.02E-02 | 9.89E-01 | 3.29E-02 |
| 283.17484 | 26.08  | 19.32 | 13.81 | 13.97 | 15.56 | 1.58E-62 | 3.65E-14 | 3.65E-14 | 3.65E-14 | 9.30E-01 | 3.79E-09 | 6.91E-08 |
| 283.19011 | 22.28  | 16.97 | 14.84 | 14.48 | 15.29 | 5.08E-41 | 3.65E-14 | 3.65E-14 | 6.92E-14 | 1.08E-01 | 3.33E-02 | 7.67E-06 |
| 283.19021 | 292.09 | 18.29 | 17.05 | 17.02 | 16.92 | 8.82E-12 | 2.23E-08 | 7.65E-09 | 1.72E-09 | 9.99E-01 | 9.31E-01 | 9.64E-01 |
| 283.20536 | 24.19  | 17.42 | 13.72 | 15.03 | 16.22 | 2.80E-30 | 3.65E-14 | 7.43E-14 | 1.43E-04 | 2.75E-05 | 8.14E-14 | 2.64E-04 |
| 283.2254  | 289.9  | 17.73 | 16.85 | 16.87 | 16.65 | 2.64E-08 | 1.32E-05 | 1.71E-05 | 1.32E-07 | 1.00E+00 | 5.43E-01 | 6.62E-01 |
| 283.26278 | 24.15  | 20.23 | 17.68 | 17.81 | 18.51 | 4.43E-44 | 3.65E-14 | 3.65E-14 | 6.47E-14 | 8.27E-01 | 7.27E-06 | 1.77E-04 |
| 283.28217 | 22.45  | 17.79 | 16.42 | 16.18 | 16.69 | 3.72E-26 | 7.32E-14 | 4.05E-14 | 1.78E-12 | 3.05E-01 | 2.42E-01 | 2.28E-03 |
| 283.2824  | 171.36 | 15.79 | 16.28 | 15.86 | 14.41 | 1.47E-06 | 4.53E-01 | 9.97E-01 | 2.77E-04 | 6.01E-01 | 9.46E-07 | 1.83E-04 |
| 283.54386 | 143.25 | 15.36 | 17.53 | 14.26 | 15.47 | 3.51E-15 | 2.06E-08 | 1.05E-02 | 9.90E-01 | 7.38E-14 | 5.68E-07 | 7.08E-03 |
| 283.58859 | 85.98  | 14.74 | 15.03 | 13.83 | 14.72 | 1.37E-03 | 7.91E-01 | 1.51E-02 | 1.00E+00 | 9.96E-04 | 7.75E-01 | 3.14E-02 |
| 283.6009  | 274.54 | 16.26 | 18.93 | 19.46 | 17.82 | 2.83E-28 | 7.23E-14 | 3.70E-14 | 7.65E-08 | 1.91E-01 | 3.91E-04 | 3.72E-08 |
| 283.63106 | 27.32  | 15.72 | 18.34 | 17.46 | 17.56 | 8.46E-34 | 3.65E-14 | 7.45E-14 | 7.41E-14 | 1.55E-05 | 2.64E-04 | 9.57E-01 |

|           |        |       |       |       |       |          |          |          |          |          |          |          |
|-----------|--------|-------|-------|-------|-------|----------|----------|----------|----------|----------|----------|----------|
| 283.65854 | 30.39  | 17.62 | 20.56 | 20.64 | 20.01 | 5.16E-37 | 3.65E-14 | 3.65E-14 | 6.52E-14 | 9.81E-01 | 8.48E-02 | 3.10E-02 |
| 283.81931 | 44.78  | 15.28 | 14.83 | 14.83 | 15.04 | 4.58E-02 | 6.90E-02 | 6.66E-02 | 5.68E-01 | 1.00E+00 | 7.08E-01 | 7.08E-01 |
| 283.92777 | 112.24 | 14.61 | 16.96 | 12.99 | 16.54 | 4.25E-12 | 1.21E-04 | 1.46E-02 | 3.35E-03 | 6.43E-11 | 8.83E-01 | 1.19E-08 |
| 283.93944 | 285.45 | 16.52 | 15.80 | 15.85 | 16.01 | 5.76E-02 | 7.12E-02 | 9.59E-02 | 3.28E-01 | 9.99E-01 | 9.09E-01 | 9.51E-01 |
| 283.94314 | 50.57  | 15.94 | 14.56 | 14.41 | 14.65 | 1.36E-06 | 6.37E-05 | 5.55E-06 | 3.50E-04 | 9.62E-01 | 9.92E-01 | 8.70E-01 |
| 283.96701 | 102.2  | 14.65 | 16.41 | 14.65 | 16.25 | 5.17E-22 | 7.74E-14 | 1.00E+00 | 2.57E-12 | 8.85E-14 | 8.62E-01 | 7.08E-12 |
| 283.98426 | 110.5  | 17.29 | 18.64 | 18.30 | 18.06 | 9.34E-12 | 5.86E-12 | 2.21E-07 | 2.06E-04 | 2.40E-01 | 1.31E-02 | 5.92E-01 |
| 283.99809 | 307.39 | 9.84  | 14.76 | 10.31 | 10.53 | 2.42E-24 | 5.74E-14 | 7.17E-01 | 4.29E-01 | 7.39E-14 | 7.48E-14 | 9.62E-01 |
| 284.00351 | 48.72  | 16.18 | 16.12 | 16.56 | 16.88 | 2.44E-03 | 9.93E-01 | 2.73E-01 | 8.12E-03 | 1.88E-01 | 4.91E-03 | 4.77E-01 |
| 284.00884 | 44.36  | 14.79 | 15.22 | 15.21 | 15.00 | 7.77E-01 | 8.00E-01 | 8.10E-01 | 9.74E-01 | 1.00E+00 | 9.71E-01 | 9.75E-01 |
| 284.02209 | 270.8  | 16.78 | 17.09 | 17.03 | 16.79 | 8.03E-01 | 8.48E-01 | 9.08E-01 | 1.00E+00 | 9.99E-01 | 8.86E-01 | 9.35E-01 |
| 284.0302  | 55.05  | 16.43 | 17.15 | 18.72 | 15.92 | 9.95E-10 | 2.90E-01 | 2.42E-07 | 6.10E-01 | 1.19E-03 | 2.37E-02 | 2.19E-09 |
| 284.03691 | 98.64  | 16.03 | 16.84 | 16.42 | 16.93 | 7.31E-05 | 7.44E-04 | 2.31E-01 | 1.98E-04 | 2.04E-01 | 9.75E-01 | 9.13E-02 |
| 284.04919 | 94.5   | 15.43 | 17.66 | 16.96 | 16.40 | 1.65E-21 | 5.87E-14 | 5.14E-12 | 3.21E-05 | 4.79E-03 | 1.02E-07 | 4.71E-02 |
| 284.05286 | 217.85 | 17.97 | 21.19 | 21.59 | 20.70 | 2.48E-40 | 3.65E-14 | 3.65E-14 | 4.87E-14 | 3.30E-01 | 1.97E-01 | 1.84E-03 |
| 284.08083 | 84.7   | 20.01 | 18.78 | 18.87 | 19.04 | 6.31E-18 | 7.39E-14 | 1.36E-13 | 5.23E-10 | 9.20E-01 | 2.86E-01 | 6.45E-01 |
| 284.09891 | 61.06  | 21.11 | 20.71 | 21.74 | 20.82 | 7.83E-06 | 2.15E-01 | 1.19E-02 | 4.96E-01 | 1.18E-05 | 9.66E-01 | 1.53E-04 |
| 284.13527 | 81.69  | 19.17 | 18.08 | 18.16 | 18.50 | 1.81E-05 | 4.55E-05 | 1.58E-04 | 3.45E-02 | 9.88E-01 | 3.36E-01 | 5.14E-01 |
| 284.14727 | 146.81 | 15.64 | 16.18 | 16.68 | 15.85 | 1.95E-03 | 2.16E-01 | 1.22E-03 | 8.91E-01 | 3.00E-01 | 6.68E-01 | 2.43E-02 |
| 284.14841 | 244.3  | 16.81 | 12.19 | 12.84 | 13.08 | 9.00E-25 | 5.67E-14 | 7.44E-14 | 7.83E-14 | 4.30E-01 | 1.83E-01 | 9.44E-01 |
| 284.16003 | 29.02  | 14.83 | 18.43 | 18.72 | 17.96 | 2.30E-20 | 7.52E-14 | 7.38E-14 | 9.13E-12 | 8.96E-01 | 7.00E-01 | 2.87E-01 |
| 284.16601 | 51.93  | 15.84 | 15.97 | 15.87 | 15.90 | 9.90E-01 | 9.87E-01 | 1.00E+00 | 9.99E-01 | 9.95E-01 | 9.98E-01 | 1.00E+00 |
| 284.18543 | 25.7   | 17.04 | 17.29 | 16.48 | 16.15 | 2.77E-09 | 4.92E-01 | 7.60E-03 | 7.77E-06 | 6.21E-05 | 2.06E-08 | 2.71E-01 |
| 284.22193 | 209.36 | 16.22 | 14.45 | 13.48 | 14.74 | 4.61E-06 | 3.70E-03 | 1.09E-06 | 2.79E-02 | 2.58E-01 | 9.49E-01 | 9.22E-02 |
| 284.26619 | 22.8   | 17.97 | 14.42 | 14.95 | 16.08 | 1.01E-57 | 3.65E-14 | 3.65E-14 | 5.74E-14 | 1.06E-02 | 7.54E-14 | 4.99E-09 |
| 284.26626 | 293.51 | 18.74 | 17.61 | 17.60 | 18.14 | 3.27E-04 | 1.22E-03 | 8.89E-04 | 2.14E-01 | 1.00E+00 | 3.40E-01 | 3.09E-01 |
| 284.29467 | 147.32 | 20.31 | 20.41 | 20.09 | 20.19 | 7.13E-01 | 9.83E-01 | 8.66E-01 | 9.76E-01 | 6.86E-01 | 8.77E-01 | 9.88E-01 |
| 284.48138 | 145.71 | 11.05 | 13.63 | 14.61 | 13.63 | 8.99E-14 | 7.15E-08 | 1.67E-13 | 1.48E-07 | 1.29E-01 | 1.00E+00 | 1.49E-01 |
| 284.50437 | 104.3  | 11.65 | 15.41 | 14.42 | 15.01 | 9.96E-16 | 1.03E-13 | 1.07E-08 | 2.49E-11 | 1.37E-01 | 8.27E-01 | 5.98E-01 |
| 284.53076 | 36.55  | 14.79 | 14.02 | 16.36 | 14.25 | 9.77E-07 | 2.86E-01 | 1.74E-03 | 6.16E-01 | 1.82E-06 | 9.59E-01 | 3.38E-05 |
| 284.54746 | 258.32 | 14.24 | 14.03 | 12.33 | 12.49 | 8.67E-06 | 9.68E-01 | 1.78E-04 | 1.15E-03 | 1.71E-03 | 7.72E-03 | 9.88E-01 |
| 284.59888 | 212.97 | 9.60  | 14.85 | 14.58 | 13.15 | 9.92E-26 | 5.43E-14 | 6.65E-14 | 2.12E-11 | 9.42E-01 | 4.22E-03 | 2.19E-02 |
| 284.62053 | 26.8   | 15.08 | 17.59 | 15.37 | 16.83 | 9.98E-15 | 9.08E-13 | 7.88E-01 | 1.10E-06 | 5.71E-10 | 1.18E-01 | 1.05E-04 |
| 284.63899 | 30.06  | 14.98 | 18.02 | 16.91 | 17.42 | 2.38E-25 | 4.07E-14 | 5.33E-12 | 7.56E-14 | 2.08E-04 | 1.21E-01 | 2.41E-01 |
| 284.65666 | 26.48  | 15.24 | 13.32 | 16.03 | 14.53 | 3.52E-09 | 1.50E-05 | 1.93E-01 | 3.10E-01 | 1.38E-09 | 2.21E-02 | 2.42E-03 |
| 284.66576 | 25.82  | 15.79 | 14.40 | 17.28 | 15.14 | 4.36E-13 | 4.35E-04 | 1.30E-04 | 2.54E-01 | 2.60E-13 | 1.84E-01 | 8.34E-08 |
| 284.67631 | 58.76  | 14.64 | 13.87 | 15.77 | 15.19 | 1.22E-04 | 2.41E-01 | 2.90E-02 | 5.55E-01 | 5.64E-05 | 1.37E-02 | 5.33E-01 |
| 284.81376 | 44.44  | 18.38 | 19.35 | 19.25 | 19.17 | 3.91E-10 | 5.95E-09 | 1.19E-07 | 4.04E-06 | 9.32E-01 | 7.07E-01 | 9.60E-01 |
| 284.82055 | 48.17  | 16.34 | 16.47 | 16.36 | 16.68 | 4.95E-02 | 7.48E-01 | 9.99E-01 | 4.82E-02 | 8.41E-01 | 3.94E-01 | 8.02E-02 |
| 284.8371  | 48.93  | 12.70 | 10.81 | 14.88 | 12.94 | 4.01E-16 | 5.64E-05 | 1.74E-06 | 9.40E-01 | 7.53E-14 | 1.48E-05 | 8.59E-05 |
| 284.86498 | 47.08  | 15.42 | 15.36 | 15.92 | 15.07 | 2.13E-03 | 9.91E-01 | 8.01E-02 | 3.75E-01 | 4.78E-02 | 5.74E-01 | 9.29E-04 |
| 284.90017 | 19.54  | 15.84 | 13.78 | 13.91 | 14.27 | 4.00E-21 | 7.46E-14 | 7.45E-14 | 2.84E-11 | 9.32E-01 | 1.32E-01 | 3.74E-01 |
| 284.90962 | 32.83  | 15.64 | 15.15 | 14.54 | 15.58 | 1.21E-03 | 3.59E-01 | 1.42E-03 | 9.97E-01 | 1.91E-01 | 5.29E-01 | 5.82E-03 |
| 284.93567 | 32.6   | 16.40 | 15.97 | 16.60 | 15.81 | 4.52E-02 | 4.80E-01 | 9.01E-01 | 2.29E-01 | 1.67E-01 | 9.61E-01 | 6.06E-02 |
| 284.95998 | 31.32  | 16.10 | 13.77 | 14.29 | 14.17 | 7.68E-10 | 2.87E-09 | 4.16E-06 | 1.90E-06 | 4.87E-01 | 7.24E-01 | 9.87E-01 |
| 284.96836 | 117.8  | 11.66 | 14.85 | 15.15 | 14.86 | 2.01E-24 | 7.39E-14 | 6.85E-14 | 7.41E-14 | 8.11E-01 | 1.00E+00 | 8.45E-01 |
| 285.00438 | 251.44 | 17.99 | 17.14 | 16.97 | 17.24 | 4.08E-03 | 2.70E-02 | 3.82E-03 | 7.14E-02 | 9.38E-01 | 9.92E-01 | 8.28E-01 |
| 285.01363 | 121.18 | 17.93 | 20.73 | 18.85 | 19.49 | 1.50E-16 | 7.32E-14 | 1.02E-02 | 3.51E-06 | 1.50E-08 | 5.65E-04 | 1.68E-01 |
| 285.04916 | 97.88  | 11.06 | 15.42 | 15.12 | 13.66 | 1.39E-12 | 3.02E-11 | 4.04E-10 | 1.91E-04 | 9.60E-01 | 2.93E-02 | 9.47E-02 |
| 285.05603 | 242.68 | 11.70 | 15.97 | 16.10 | 15.75 | 1.36E-38 | 3.65E-14 | 3.65E-14 | 3.67E-14 | 9.82E-01 | 9.09E-01 | 7.24E-01 |
| 285.06942 | 79.35  | 19.82 | 17.82 | 16.18 | 18.57 | 1.46E-25 | 5.57E-10 | 3.72E-14 | 2.86E-04 | 8.94E-07 | 7.72E-02 | 2.33E-12 |
| 285.08684 | 83.22  | 15.64 | 16.37 | 13.33 | 14.68 | 7.19E-09 | 4.03E-01 | 6.59E-06 | 1.85E-01 | 6.45E-09 | 3.98E-03 | 3.20E-02 |
| 285.10131 | 51.55  | 17.96 | 16.73 | 17.92 | 17.36 | 2.55E-08 | 1.47E-07 | 9.97E-01 | 3.15E-02 | 7.83E-07 | 2.92E-02 | 6.13E-02 |
| 285.1136  | 42.59  | 14.58 | 17.88 | 15.57 | 15.34 | 9.48E-11 | 3.65E-11 | 1.31E-01 | 3.66E-01 | 7.37E-06 | 1.74E-06 | 9.65E-01 |
| 285.11933 | 81.24  | 17.21 | 17.35 | 17.46 | 17.35 | 8.65E-01 | 9.64E-01 | 8.26E-01 | 9.66E-01 | 9.83E-01 | 1.00E+00 | 9.85E-01 |
| 285.1208  | 192.55 | 12.23 | 17.21 | 16.62 | 15.99 | 7.16E-19 | 7.41E-14 | 1.23E-13 | 3.22E-10 | 7.03E-01 | 1.37E-01 | 6.72E-01 |
| 285.1284  | 54.89  | 16.00 | 16.98 | 14.43 | 16.13 | 9.40E-10 | 3.32E-02 | 7.60E-05 | 9.84E-01 | 1.90E-10 | 1.16E-01 | 4.96E-05 |
| 285.16957 | 207.1  | 16.19 | 11.39 | 10.90 | 11.28 | 9.63E-23 | 7.49E-14 | 7.29E-14 | 7.41E-14 | 8.01E-01 | 9.98E-01 | 8.98E-01 |
| 285.1846  | 292.84 | 19.00 | 17.62 | 17.63 | 17.45 | 1.27E-10 | 1.37E-07 | 1.20E-07 | 7.47E-09 | 1.00E+00 | 9.07E-01 | 8.94E-01 |
| 285.20577 | 274.65 | 17.73 | 16.09 | 15.76 | 16.61 | 9.67E-17 | 1.02E-11 | 7.38E-14 | 7.45E-06 | 4.59E-01 | 1.17E-01 | 1.61E-03 |
| 285.22095 | 23.83  | 19.84 | 17.87 | 18.78 | 19.43 | 5.82E-21 | 6.81E-14 | 1.65E-07 | 1.39E-01 | 1.62E-05 | 6.18E-13 | 5.60E-03 |
| 285.22129 | 167.32 | 18.41 | 16.47 | 17.14 | 17.57 | 4.58E-18 | 7.24E-14 | 2.05E-09 | 1.97E-04 | 5.05E-03 | 1.67E-06 | 1.67E-01 |
| 285.24211 | 22.62  | 16.91 | 12.54 | 13.23 | 14.19 | 4.49E-53 | 3.65E-14 | 3.65E-14 | 3.87E-14 | 1.37E-02 | 1.03E-10 | 2.42E-04 |
| 285.24236 | 169.48 | 17.32 | 15.29 | 15.44 | 15.85 | 1.08E-26 | 4.67E-14 | 6.45E-14 | 2.73E-13 | 8.50E-01 | 1.62E-02 | 1.19E-01 |
| 285.27854 | 22.75  | 17.73 | 16.14 | 16.38 | 16.52 | 1.71E-08 | 8.44E-11 | 8.77E-09 | 1.26E-09 | 8.28E-01 | 9.93E-01 | 9.45E-01 |
| 285.27854 | 292.94 | 19.24 | 17.13 | 17.38 | 17.21 | 5.91E-13 | 5.66E-08 | 3.87E-06 | 9.26E-05 | 8.20E-01 | 5.28E-01 | 9.55E-01 |
| 285.298   | 288.74 | 18.71 | 17.39 | 17.38 | 17.30 | 2.26E-09 | 6.12E-07 | 4.56E-07 | 2.01E-07 | 1.00E+00 | 9.85E-01 | 9.86E-01 |
| 285.53723 | 168.56 | 13.48 | 14.58 | 13.95 | 11.71 | 1.12E-05 | 1.75E-01 | 8.19E-01 | 7.84E-03 | 6.57E-01 | 5.26E-06 | 5.44E-04 |

|           |        |       |       |       |       |          |          |          |          |          |          |          |
|-----------|--------|-------|-------|-------|-------|----------|----------|----------|----------|----------|----------|----------|
| 285.8952  | 38.16  | 20.57 | 16.10 | 17.29 | 15.53 | 1.57E-27 | 6.38E-14 | 5.09E-13 | 4.05E-14 | 2.81E-02 | 5.58E-01 | 4.03E-04 |
| 285.90295 | 50.55  | 18.11 | 20.97 | 21.10 | 20.45 | 4.05E-46 | 3.65E-14 | 3.65E-14 | 3.67E-14 | 8.95E-01 | 3.65E-02 | 4.17E-03 |
| 285.91692 | 300.84 | 15.75 | 13.99 | 13.03 | 15.82 | 1.43E-21 | 2.56E-08 | 7.65E-14 | 9.95E-01 | 7.73E-03 | 4.52E-08 | 7.45E-14 |
| 285.9407  | 291.24 | 15.78 | 9.35  | 9.93  | 10.94 | 6.39E-61 | 3.65E-14 | 3.65E-14 | 3.65E-14 | 2.32E-01 | 5.74E-06 | 7.67E-03 |
| 285.96902 | 39.87  | 17.98 | 13.92 | 14.53 | 14.62 | 1.28E-20 | 7.43E-14 | 9.81E-14 | 6.58E-13 | 4.71E-01 | 3.72E-01 | 9.96E-01 |
| 286.00002 | 54.25  | 14.43 | 10.94 | 12.04 | 14.21 | 3.24E-12 | 2.07E-10 | 1.52E-05 | 9.71E-01 | 1.43E-01 | 2.01E-08 | 3.06E-04 |
| 286.01666 | 124.28 | 15.18 | 14.19 | 12.99 | 14.21 | 7.25E-16 | 2.02E-04 | 7.41E-14 | 4.20E-04 | 6.11E-06 | 1.00E+00 | 7.73E-06 |
| 286.06822 | 281.19 | 13.41 | 17.97 | 17.86 | 17.23 | 1.30E-38 | 3.65E-14 | 3.65E-14 | 4.23E-14 | 9.85E-01 | 1.31E-01 | 2.47E-01 |
| 286.06973 | 86.01  | 17.65 | 14.33 | 13.09 | 14.57 | 1.68E-11 | 9.95E-07 | 9.74E-12 | 1.20E-05 | 2.03E-01 | 9.82E-01 | 1.02E-01 |
| 286.10514 | 40.78  | 16.55 | 16.70 | 15.93 | 15.58 | 3.49E-04 | 9.44E-01 | 1.13E-01 | 4.54E-03 | 3.49E-02 | 1.00E-03 | 6.33E-01 |
| 286.1197  | 50.43  | 17.47 | 16.73 | 17.41 | 16.95 | 1.25E-04 | 4.27E-04 | 9.88E-01 | 3.33E-02 | 2.01E-03 | 6.54E-01 | 8.62E-02 |
| 286.12808 | 222.28 | 16.32 | 9.32  | 8.98  | 11.87 | 2.80E-27 | 5.85E-14 | 4.23E-14 | 4.52E-10 | 9.53E-01 | 1.08E-03 | 1.26E-04 |
| 286.1405  | 50.6   | 17.69 | 17.92 | 17.66 | 17.44 | 3.63E-03 | 2.49E-01 | 9.95E-01 | 1.62E-01 | 1.72E-01 | 1.17E-03 | 2.75E-01 |
| 286.15096 | 64.3   | 14.52 | 15.97 | 14.75 | 16.30 | 2.38E-04 | 1.03E-02 | 9.61E-01 | 1.34E-03 | 4.96E-02 | 9.12E-01 | 8.69E-03 |
| 286.16463 | 158.56 | 17.29 | 14.37 | 14.36 | 15.49 | 2.11E-39 | 3.65E-14 | 3.65E-14 | 7.67E-14 | 1.00E+00 | 1.46E-06 | 1.02E-06 |
| 286.18817 | 216.28 | 16.92 | 14.09 | 13.62 | 14.61 | 8.81E-22 | 7.63E-14 | 7.03E-14 | 9.71E-11 | 4.78E-01 | 4.21E-01 | 1.86E-02 |
| 286.20105 | 25.03  | 18.44 | 18.30 | 19.14 | 18.27 | 2.08E-08 | 7.62E-01 | 2.12E-05 | 6.79E-01 | 4.79E-07 | 9.99E-01 | 4.23E-07 |
| 286.22436 | 23.98  | 17.64 | 14.58 | 15.56 | 16.75 | 1.21E-28 | 3.67E-14 | 7.67E-14 | 1.89E-03 | 4.64E-04 | 8.28E-14 | 2.11E-05 |
| 286.27384 | 22.73  | 14.65 | 11.65 | 12.14 | 13.32 | 3.16E-14 | 3.12E-13 | 5.34E-10 | 3.41E-03 | 5.57E-01 | 1.67E-04 | 1.44E-02 |
| 286.31022 | 22.67  | 16.95 | 14.51 | 14.60 | 15.57 | 1.93E-20 | 7.36E-14 | 7.32E-14 | 1.95E-06 | 9.86E-01 | 6.33E-04 | 1.91E-03 |
| 286.55419 | 126.39 | 16.78 | 17.91 | 12.65 | 14.83 | 1.86E-33 | 1.16E-02 | 4.72E-14 | 2.51E-06 | 3.65E-14 | 5.35E-13 | 2.31E-07 |
| 286.58941 | 92.62  | 17.12 | 15.52 | 15.27 | 15.54 | 1.21E-13 | 2.08E-09 | 3.27E-12 | 8.69E-09 | 7.49E-01 | 1.00E+00 | 7.12E-01 |
| 286.5986  | 84.5   | 14.58 | 15.96 | 14.89 | 15.48 | 1.82E-05 | 1.77E-05 | 6.90E-01 | 1.41E-02 | 2.07E-03 | 3.90E-01 | 2.18E-01 |
| 286.77144 | 49.95  | 18.79 | 19.49 | 19.52 | 19.11 | 4.66E-05 | 3.90E-04 | 1.58E-04 | 2.62E-01 | 9.98E-01 | 1.69E-01 | 1.12E-01 |
| 286.81177 | 44.85  | 14.77 | 15.11 | 14.97 | 15.28 | 2.23E-01 | 5.05E-01 | 8.35E-01 | 1.75E-01 | 9.47E-01 | 9.10E-01 | 6.24E-01 |
| 286.85406 | 25.37  | 16.49 | 7.37  | 7.60  | 8.42  | 2.14E-97 | 3.65E-14 | 3.65E-14 | 3.65E-14 | 8.47E-01 | 2.23E-03 | 2.59E-02 |
| 286.9067  | 50.51  | 11.93 | 15.34 | 15.18 | 14.71 | 6.92E-20 | 7.32E-14 | 7.41E-14 | 1.78E-11 | 9.75E-01 | 3.65E-01 | 6.05E-01 |
| 286.93194 | 50.84  | 18.97 | 18.78 | 19.56 | 19.21 | 1.33E-04 | 6.88E-01 | 3.66E-03 | 5.06E-01 | 9.14E-05 | 8.21E-02 | 2.31E-01 |
| 286.95153 | 49.75  | 17.34 | 18.60 | 19.04 | 18.55 | 3.28E-21 | 1.29E-12 | 6.65E-14 | 2.64E-11 | 3.85E-02 | 9.91E-01 | 2.02E-02 |
| 286.95887 | 28.36  | 15.54 | 14.92 | 14.58 | 15.19 | 2.87E-03 | 8.08E-02 | 1.44E-03 | 5.63E-01 | 5.91E-01 | 7.48E-01 | 1.17E-01 |
| 286.98383 | 166.16 | 14.87 | 15.72 | 14.98 | 15.13 | 2.18E-01 | 1.91E-01 | 9.93E-01 | 9.31E-01 | 3.28E-01 | 5.60E-01 | 9.87E-01 |
| 286.98384 | 270.49 | 16.55 | 16.28 | 16.80 | 16.42 | 2.39E-01 | 7.10E-01 | 7.55E-01 | 9.54E-01 | 1.91E-01 | 9.59E-01 | 4.72E-01 |
| 286.99799 | 79.33  | 18.21 | 20.01 | 20.04 | 19.24 | 3.87E-06 | 3.24E-05 | 1.83E-05 | 4.97E-02 | 1.00E+00 | 2.36E-01 | 1.97E-01 |
| 287.01293 | 76.12  | 17.85 | 15.07 | 15.48 | 15.66 | 6.66E-25 | 5.38E-14 | 7.45E-14 | 8.36E-14 | 3.75E-01 | 1.13E-01 | 8.97E-01 |
| 287.06381 | 168.08 | 10.68 | 14.00 | 14.03 | 14.78 | 5.53E-19 | 2.05E-12 | 8.23E-13 | 7.56E-14 | 1.00E+00 | 3.12E-01 | 3.45E-01 |
| 287.07636 | 116.75 | 17.06 | 16.23 | 16.82 | 16.78 | 1.07E-02 | 5.08E-03 | 7.51E-01 | 6.82E-01 | 9.78E-02 | 1.58E-01 | 9.99E-01 |
| 287.09068 | 91.46  | 19.64 | 18.24 | 18.63 | 18.11 | 3.07E-13 | 1.70E-10 | 4.48E-06 | 1.14E-11 | 2.23E-01 | 9.28E-01 | 6.40E-02 |
| 287.12344 | 289.21 | 18.19 | 16.61 | 16.58 | 16.39 | 3.81E-12 | 1.74E-08 | 6.86E-09 | 4.46E-10 | 1.00E+00 | 8.59E-01 | 9.00E-01 |
| 287.20055 | 178.76 | 17.28 | 14.60 | 14.98 | 15.15 | 9.40E-35 | 3.65E-14 | 3.85E-14 | 6.41E-14 | 2.09E-01 | 3.68E-02 | 8.45E-01 |
| 287.20356 | 24.09  | 15.18 | 13.49 | 14.82 | 14.32 | 2.36E-06 | 1.30E-06 | 6.72E-01 | 4.26E-02 | 2.96E-04 | 6.51E-02 | 4.24E-01 |
| 287.23654 | 23.81  | 20.04 | 18.45 | 19.05 | 19.24 | 4.78E-13 | 1.32E-13 | 2.61E-06 | 3.59E-04 | 1.22E-02 | 7.40E-04 | 7.94E-01 |
| 287.2369  | 162.38 | 18.45 | 16.48 | 17.29 | 17.07 | 2.41E-18 | 7.59E-14 | 7.36E-08 | 4.98E-10 | 4.44E-04 | 2.69E-02 | 6.97E-01 |
| 287.27294 | 24.44  | 16.60 | 10.49 | 11.09 | 12.20 | 1.69E-74 | 3.65E-14 | 3.65E-14 | 3.65E-14 | 5.72E-02 | 2.59E-10 | 5.84E-05 |
| 287.63303 | 29.07  | 20.32 | 16.18 | 16.89 | 17.58 | 1.05E-25 | 4.16E-14 | 7.38E-14 | 6.05E-12 | 2.01E-01 | 1.22E-03 | 2.43E-01 |
| 287.64386 | 28.66  | 16.39 | 17.86 | 16.32 | 16.39 | 5.94E-04 | 2.56E-03 | 9.98E-01 | 1.00E+00 | 1.87E-03 | 5.03E-03 | 9.98E-01 |
| 287.88946 | 30.22  | 22.05 | 11.52 | 12.68 | 14.60 | 1.14E-72 | 3.65E-14 | 3.65E-14 | 3.65E-14 | 2.95E-02 | 7.82E-11 | 6.83E-05 |
| 287.89994 | 50.82  | 17.47 | 20.35 | 20.50 | 19.87 | 7.45E-47 | 3.65E-14 | 3.65E-14 | 3.65E-14 | 8.50E-01 | 6.04E-02 | 5.65E-03 |
| 287.92276 | 29.19  | 14.71 | 16.09 | 13.26 | 16.66 | 1.17E-09 | 3.37E-02 | 2.09E-02 | 1.22E-03 | 6.81E-07 | 7.12E-01 | 4.91E-09 |
| 287.93911 | 64.29  | 17.68 | 11.64 | 14.16 | 13.34 | 3.35E-38 | 3.65E-14 | 7.25E-14 | 5.05E-14 | 1.96E-09 | 1.56E-04 | 1.57E-01 |
| 287.95793 | 29.78  | 11.65 | 12.06 | 11.91 | 11.45 | 6.69E-01 | 7.93E-01 | 9.32E-01 | 9.69E-01 | 9.89E-01 | 5.59E-01 | 7.46E-01 |
| 287.95803 | 135.78 | 12.06 | 14.08 | 10.07 | 12.08 | 5.28E-07 | 1.30E-02 | 1.35E-02 | 1.00E+00 | 6.36E-08 | 2.33E-02 | 2.08E-02 |
| 287.98032 | 267.24 | 19.50 | 21.50 | 21.81 | 19.84 | 4.71E-20 | 1.95E-12 | 7.41E-14 | 5.77E-01 | 6.50E-01 | 3.01E-08 | 3.61E-11 |
| 287.99577 | 59.39  | 13.40 | 14.82 | 15.71 | 15.39 | 5.73E-08 | 2.44E-03 | 8.81E-08 | 1.07E-05 | 1.25E-01 | 5.12E-01 | 8.74E-01 |
| 288.02456 | 58.76  | 14.31 | 14.14 | 15.03 | 15.05 | 8.95E-02 | 9.82E-01 | 3.31E-01 | 3.46E-01 | 1.92E-01 | 2.05E-01 | 1.00E+00 |
| 288.05143 | 94.4   | 11.10 | 14.59 | 13.39 | 13.88 | 1.48E-11 | 2.02E-11 | 1.18E-05 | 2.08E-07 | 6.72E-02 | 4.89E-01 | 7.60E-01 |
| 288.06899 | 294.46 | 8.57  | 16.89 | 15.09 | 14.80 | 1.99E-31 | 3.65E-14 | 6.67E-14 | 7.43E-14 | 2.51E-02 | 8.43E-03 | 9.68E-01 |
| 288.07467 | 83.36  | 17.35 | 16.60 | 16.84 | 16.53 | 1.37E-04 | 8.53E-04 | 4.40E-02 | 3.03E-04 | 6.16E-01 | 9.85E-01 | 4.12E-01 |
| 288.08257 | 77.28  | 16.38 | 16.78 | 16.71 | 16.94 | 5.20E-02 | 1.97E-01 | 3.53E-01 | 3.69E-02 | 9.86E-01 | 8.78E-01 | 6.98E-01 |
| 288.10015 | 83.8   | 14.94 | 15.32 | 14.11 | 14.39 | 1.03E-03 | 6.22E-01 | 3.81E-02 | 3.16E-01 | 1.14E-03 | 2.77E-02 | 8.26E-01 |
| 288.10698 | 62.62  | 16.06 | 14.70 | 14.64 | 14.84 | 2.35E-03 | 9.12E-03 | 5.06E-03 | 3.03E-02 | 9.99E-01 | 9.90E-01 | 9.68E-01 |
| 288.11891 | 75.2   | 16.50 | 16.96 | 16.96 | 17.24 | 4.56E-03 | 1.01E-01 | 1.01E-01 | 2.21E-03 | 1.00E+00 | 5.53E-01 | 5.32E-01 |
| 288.13464 | 41.63  | 18.61 | 12.01 | 13.56 | 15.17 | 8.92E-42 | 3.65E-14 | 3.65E-14 | 8.18E-14 | 7.62E-04 | 3.43E-12 | 6.40E-04 |
| 288.16001 | 27.13  | 16.89 | 20.50 | 18.87 | 19.52 | 4.55E-33 | 3.65E-14 | 3.89E-13 | 7.05E-14 | 5.08E-09 | 1.42E-03 | 6.22E-02 |
| 288.1802  | 26.21  | 16.78 | 13.19 | 14.92 | 13.49 | 1.78E-11 | 1.70E-10 | 1.76E-03 | 1.17E-08 | 6.10E-03 | 9.46E-01 | 4.09E-02 |
| 288.2029  | 55.54  | 17.14 | 17.42 | 17.45 | 17.48 | 5.32E-02 | 1.73E-01 | 1.01E-01 | 8.14E-02 | 9.96E-01 | 9.81E-01 | 9.98E-01 |
| 288.21672 | 23.84  | 18.75 | 19.35 | 19.72 | 19.34 | 1.80E-05 | 1.17E-02 | 4.51E-06 | 1.66E-02 | 2.32E-01 | 1.00E+00 | 2.36E-01 |
| 288.2281  | 56.51  | 15.11 | 14.40 | 14.44 | 14.02 | 5.91E-03 | 9.24E-02 | 1.18E-01 | 3.10E-03 | 9.99E-01 | 6.36E-01 | 5.51E-01 |
| 288.23992 | 23.76  | 17.78 | 14.24 | 16.08 | 16.18 | 4.66E-20 | 6.16E-14 | 2.00E-06 | 1.78E-05 | 4.57E-07 | 2.84E-07 | 9.92E-01 |

|           |        |       |       |       |       |          |          |          |          |          |          |          |
|-----------|--------|-------|-------|-------|-------|----------|----------|----------|----------|----------|----------|----------|
| 288.28947 | 23.18  | 17.65 | 13.36 | 14.58 | 15.50 | 1.36E-37 | 3.65E-14 | 4.59E-14 | 1.57E-12 | 9.67E-05 | 1.06E-11 | 7.39E-03 |
| 288.54098 | 240.17 | 15.21 | 15.00 | 17.07 | 15.46 | 1.24E-15 | 8.26E-01 | 1.96E-12 | 7.36E-01 | 1.25E-13 | 2.75E-01 | 8.62E-09 |
| 288.57121 | 298.04 | 9.54  | 18.18 | 16.75 | 14.68 | 8.03E-40 | 3.65E-14 | 3.65E-14 | 7.41E-14 | 5.01E-02 | 2.63E-08 | 1.92E-03 |
| 288.59204 | 99.92  | 17.91 | 15.96 | 16.87 | 16.28 | 7.27E-17 | 7.44E-14 | 1.20E-05 | 1.65E-11 | 2.64E-04 | 4.92E-01 | 4.46E-02 |
| 288.64078 | 28.28  | 19.73 | 13.61 | 15.59 | 15.42 | 7.32E-41 | 3.65E-14 | 4.70E-14 | 4.50E-14 | 1.39E-06 | 2.49E-05 | 9.70E-01 |
| 288.65181 | 27.51  | 15.16 | 17.90 | 16.29 | 16.75 | 7.93E-06 | 1.70E-06 | 1.22E-01 | 1.57E-02 | 1.46E-02 | 1.59E-01 | 8.34E-01 |
| 288.66172 | 27.5   | 15.35 | 18.36 | 17.09 | 17.87 | 1.34E-41 | 3.65E-14 | 7.41E-14 | 3.65E-14 | 4.51E-10 | 5.52E-02 | 3.32E-04 |
| 288.67031 | 27.37  | 16.04 | 18.59 | 17.79 | 18.31 | 5.38E-57 | 3.65E-14 | 3.65E-14 | 3.65E-14 | 7.66E-09 | 1.45E-01 | 4.42E-04 |
| 288.76853 | 49.87  | 19.18 | 20.02 | 20.04 | 19.62 | 5.96E-06 | 4.94E-05 | 2.94E-05 | 9.62E-02 | 1.00E+00 | 1.70E-01 | 1.42E-01 |
| 288.92102 | 21.08  | 19.84 | 15.59 | 16.60 | 16.58 | 1.88E-51 | 3.65E-14 | 3.65E-14 | 3.65E-14 | 4.77E-05 | 1.34E-04 | 1.00E+00 |
| 288.92922 | 46.81  | 18.05 | 17.01 | 17.88 | 17.60 | 6.20E-10 | 5.33E-10 | 6.73E-01 | 2.15E-02 | 4.58E-07 | 2.00E-03 | 2.92E-01 |
| 288.9416  | 293.37 | 14.39 | 16.90 | 16.15 | 16.49 | 1.68E-10 | 4.32E-10 | 1.38E-05 | 4.24E-07 | 1.92E-01 | 7.12E-01 | 8.17E-01 |
| 288.94183 | 184.78 | 13.22 | 16.93 | 16.16 | 16.43 | 1.05E-12 | 1.37E-11 | 6.41E-08 | 1.18E-08 | 4.33E-01 | 7.76E-01 | 9.56E-01 |
| 288.95512 | 33.37  | 15.04 | 15.64 | 15.65 | 16.33 | 1.31E-06 | 3.09E-02 | 2.49E-02 | 1.76E-07 | 1.00E+00 | 1.78E-02 | 1.90E-02 |
| 288.98352 | 79.09  | 20.25 | 20.59 | 21.61 | 20.97 | 1.63E-08 | 3.82E-01 | 6.30E-09 | 7.36E-03 | 4.09E-05 | 3.60E-01 | 2.51E-02 |
| 288.98373 | 251.65 | 16.01 | 15.54 | 15.95 | 14.81 | 1.20E-05 | 2.20E-01 | 9.96E-01 | 2.08E-05 | 3.41E-01 | 2.88E-02 | 8.07E-05 |
| 288.9902  | 305.66 | 10.49 | 17.77 | 14.62 | 13.63 | 3.06E-38 | 3.65E-14 | 7.46E-14 | 1.89E-10 | 1.47E-10 | 7.57E-14 | 1.44E-01 |
| 288.99215 | 66.26  | 19.01 | 18.19 | 18.57 | 18.38 | 1.48E-04 | 8.71E-05 | 7.87E-02 | 5.50E-03 | 1.92E-01 | 7.77E-01 | 7.56E-01 |
| 289.01055 | 90.72  | 15.55 | 18.31 | 18.76 | 17.30 | 1.45E-33 | 3.92E-14 | 3.65E-14 | 2.06E-11 | 2.29E-01 | 3.00E-04 | 4.28E-08 |
| 289.02472 | 90.59  | 15.59 | 19.51 | 17.78 | 18.44 | 1.07E-24 | 3.92E-14 | 8.80E-10 | 9.67E-14 | 3.07E-06 | 1.21E-02 | 2.18E-01 |
| 289.0311  | 197    | 13.81 | 15.39 | 15.37 | 16.09 | 4.08E-09 | 3.96E-05 | 3.91E-05 | 3.08E-09 | 1.00E+00 | 2.11E-01 | 1.90E-01 |
| 289.04024 | 50.94  | 17.24 | 15.90 | 17.22 | 16.77 | 7.96E-08 | 3.15E-07 | 9.99E-01 | 2.13E-01 | 1.12E-06 | 3.86E-03 | 2.85E-01 |
| 289.04897 | 217.94 | 16.36 | 18.10 | 18.75 | 18.30 | 1.41E-27 | 7.56E-14 | 3.72E-14 | 7.32E-14 | 7.34E-03 | 7.66E-01 | 1.30E-01 |
| 289.06691 | 85.68  | 13.69 | 12.43 | 10.38 | 12.95 | 1.45E-07 | 1.10E-01 | 5.08E-08 | 5.63E-01 | 2.34E-03 | 8.19E-01 | 1.09E-04 |
| 289.07185 | 295.76 | 14.26 | 15.49 | 15.13 | 15.34 | 1.73E-05 | 2.78E-05 | 5.38E-03 | 4.75E-04 | 5.31E-01 | 9.48E-01 | 8.68E-01 |
| 289.14081 | 62.49  | 17.77 | 15.67 | 15.52 | 16.12 | 1.64E-09 | 1.63E-07 | 1.40E-08 | 9.37E-05 | 9.79E-01 | 6.48E-01 | 4.02E-01 |
| 289.16279 | 71.99  | 16.24 | 18.24 | 18.42 | 18.01 | 6.11E-18 | 2.65E-13 | 7.45E-14 | 1.61E-10 | 8.88E-01 | 8.20E-01 | 3.91E-01 |
| 289.17671 | 28.63  | 14.57 | 17.92 | 18.22 | 16.98 | 4.31E-34 | 3.70E-14 | 3.65E-14 | 7.77E-14 | 6.95E-01 | 5.24E-03 | 8.27E-05 |
| 289.17972 | 212.81 | 16.43 | 10.14 | 10.71 | 12.58 | 1.10E-68 | 3.65E-14 | 3.65E-14 | 3.65E-14 | 1.48E-01 | 7.67E-14 | 3.16E-10 |
| 289.20935 | 30.56  | 14.56 | 14.93 | 11.88 | 14.63 | 1.11E-21 | 6.05E-01 | 7.41E-14 | 9.97E-01 | 7.38E-14 | 7.72E-01 | 7.65E-14 |
| 289.21616 | 209.74 | 16.14 | 10.81 | 10.75 | 13.55 | 1.74E-24 | 7.14E-14 | 6.81E-14 | 1.04E-05 | 1.00E+00 | 5.67E-06 | 2.93E-06 |
| 289.21858 | 24.18  | 16.91 | 15.69 | 16.37 | 16.42 | 4.02E-06 | 6.17E-07 | 6.85E-02 | 1.41E-01 | 1.63E-02 | 1.12E-02 | 9.96E-01 |
| 289.25233 | 23.68  | 16.91 | 14.96 | 14.87 | 16.05 | 7.56E-22 | 7.36E-14 | 7.29E-14 | 4.18E-04 | 9.72E-01 | 8.97E-06 | 9.63E-07 |
| 289.56485 | 234.32 | 11.65 | 16.25 | 16.64 | 15.50 | 5.48E-36 | 3.65E-14 | 3.65E-14 | 6.92E-14 | 7.07E-01 | 1.94E-01 | 1.35E-02 |
| 289.59913 | 98.02  | 17.14 | 16.33 | 15.99 | 16.26 | 2.03E-04 | 1.48E-02 | 1.36E-04 | 8.87E-03 | 6.07E-01 | 9.95E-01 | 7.70E-01 |
| 289.64794 | 29.1   | 19.93 | 16.51 | 16.81 | 17.48 | 3.95E-26 | 4.74E-14 | 6.87E-14 | 5.87E-13 | 7.60E-01 | 1.28E-02 | 1.44E-01 |
| 289.65986 | 27.6   | 12.30 | 18.60 | 17.17 | 17.21 | 3.94E-54 | 3.65E-14 | 3.65E-14 | 3.65E-14 | 6.38E-05 | 2.05E-04 | 9.99E-01 |
| 289.67605 | 29.78  | 15.43 | 14.50 | 16.90 | 14.71 | 8.83E-07 | 1.55E-01 | 5.31E-03 | 3.89E-01 | 1.76E-06 | 9.69E-01 | 2.64E-05 |
| 289.89679 | 50.54  | 15.09 | 17.51 | 17.68 | 17.11 | 3.30E-17 | 3.34E-13 | 7.80E-14 | 2.29E-09 | 9.46E-01 | 5.83E-01 | 2.67E-01 |
| 289.92606 | 32.79  | 16.49 | 18.14 | 18.16 | 18.55 | 4.65E-34 | 5.10E-14 | 4.65E-14 | 3.65E-14 | 1.00E+00 | 4.14E-02 | 4.94E-02 |
| 289.94318 | 118.59 | 15.01 | 16.06 | 14.74 | 15.86 | 3.51E-02 | 1.72E-01 | 9.46E-01 | 3.79E-01 | 5.74E-02 | 9.81E-01 | 1.61E-01 |
| 289.96588 | 304.77 | 13.03 | 15.19 | 15.51 | 13.78 | 7.45E-19 | 7.22E-13 | 7.36E-14 | 3.78E-02 | 6.75E-01 | 1.22E-05 | 4.41E-08 |
| 289.98515 | 255.42 | 15.58 | 16.50 | 15.99 | 14.98 | 2.14E-03 | 7.33E-02 | 6.83E-01 | 4.21E-01 | 5.61E-01 | 1.13E-03 | 5.60E-02 |
| 290.03353 | 57.29  | 17.25 | 15.43 | 17.19 | 15.11 | 1.98E-10 | 6.87E-06 | 9.98E-01 | 1.88E-07 | 2.43E-05 | 8.37E-01 | 7.92E-07 |
| 290.03431 | 193.88 | 13.68 | 16.13 | 16.18 | 16.34 | 1.60E-12 | 5.23E-09 | 1.89E-09 | 6.19E-10 | 9.99E-01 | 9.53E-01 | 9.76E-01 |
| 290.05676 | 235.25 | 15.96 | 20.18 | 20.90 | 19.39 | 2.14E-28 | 6.81E-14 | 3.72E-14 | 1.18E-13 | 2.91E-01 | 2.49E-01 | 2.20E-03 |
| 290.066   | 69.85  | 14.04 | 12.01 | 11.26 | 14.79 | 7.22E-09 | 3.08E-03 | 1.51E-05 | 5.87E-01 | 5.97E-01 | 5.56E-05 | 1.42E-07 |
| 290.07616 | 77.39  | 17.31 | 10.64 | 11.39 | 12.56 | 9.46E-33 | 3.65E-14 | 3.87E-14 | 7.28E-14 | 4.61E-01 | 1.79E-03 | 1.10E-01 |
| 290.08052 | 203.18 | 15.16 | 17.54 | 17.41 | 17.29 | 1.01E-14 | 3.71E-12 | 2.66E-11 | 1.16E-09 | 9.80E-01 | 8.75E-01 | 9.81E-01 |
| 290.08677 | 281.09 | 17.05 | 17.64 | 18.29 | 16.89 | 1.31E-09 | 3.30E-02 | 1.06E-07 | 8.88E-01 | 1.70E-02 | 6.30E-03 | 1.44E-08 |
| 290.08709 | 92.49  | 20.23 | 19.80 | 20.24 | 20.17 | 3.68E-03 | 6.63E-03 | 1.00E+00 | 9.63E-01 | 7.72E-03 | 4.52E-02 | 9.59E-01 |
| 290.0981  | 266.92 | 15.26 | 20.38 | 20.64 | 18.94 | 2.04E-36 | 3.65E-14 | 3.65E-14 | 7.47E-14 | 9.04E-01 | 2.53E-03 | 1.80E-04 |
| 290.13462 | 74.5   | 20.48 | 21.59 | 21.43 | 21.76 | 2.80E-08 | 3.91E-06 | 7.79E-05 | 1.53E-07 | 9.00E-01 | 8.71E-01 | 4.74E-01 |
| 290.14851 | 68.69  | 19.46 | 19.43 | 19.35 | 19.85 | 4.30E-02 | 9.98E-01 | 9.29E-01 | 1.35E-01 | 9.74E-01 | 1.10E-01 | 3.75E-02 |
| 290.1599  | 30.69  | 16.30 | 17.59 | 17.27 | 17.48 | 4.40E-06 | 1.21E-05 | 1.61E-03 | 1.32E-04 | 6.30E-01 | 9.77E-01 | 8.75E-01 |
| 290.18229 | 64.79  | 15.40 | 15.44 | 14.72 | 15.19 | 2.34E-01 | 9.99E-01 | 2.80E-01 | 9.52E-01 | 2.51E-01 | 9.22E-01 | 6.45E-01 |
| 290.18903 | 21.73  | 13.47 | 12.66 | 12.89 | 13.64 | 6.09E-02 | 1.74E-01 | 4.56E-01 | 9.76E-01 | 9.39E-01 | 9.28E-02 | 2.78E-01 |
| 290.19599 | 25.42  | 16.34 | 15.96 | 15.03 | 15.57 | 1.55E-04 | 5.59E-01 | 6.83E-05 | 5.58E-02 | 1.30E-02 | 6.06E-01 | 3.03E-01 |
| 290.21142 | 220.01 | 16.60 | 13.91 | 13.77 | 14.80 | 1.73E-16 | 4.05E-13 | 8.69E-14 | 2.08E-06 | 9.73E-01 | 6.29E-02 | 1.90E-02 |
| 290.54841 | 85.26  | 15.88 | 18.83 | 19.38 | 18.49 | 5.81E-39 | 3.65E-14 | 3.65E-14 | 5.43E-14 | 8.69E-02 | 4.82E-01 | 1.29E-03 |
| 290.55865 | 234.68 | 15.82 | 17.48 | 18.22 | 17.11 | 2.23E-25 | 1.04E-13 | 3.74E-14 | 5.05E-09 | 1.73E-03 | 3.04E-01 | 1.41E-06 |
| 290.57796 | 83.89  | 16.43 | 16.61 | 16.26 | 16.32 | 6.54E-01 | 9.20E-01 | 9.30E-01 | 9.82E-01 | 6.22E-01 | 7.69E-01 | 9.97E-01 |
| 290.62771 | 28.15  | 18.60 | 11.93 | 12.55 | 13.42 | 4.54E-81 | 3.65E-14 | 3.65E-14 | 3.65E-14 | 5.05E-02 | 5.25E-08 | 3.02E-03 |
| 290.63902 | 27.35  | 16.80 | 20.66 | 19.42 | 19.87 | 2.92E-38 | 3.65E-14 | 6.43E-14 | 3.83E-14 | 1.01E-05 | 1.48E-02 | 3.00E-01 |
| 290.66758 | 27.04  | 14.52 | 20.31 | 18.77 | 18.35 | 1.92E-30 | 3.65E-14 | 7.41E-14 | 7.77E-14 | 2.83E-03 | 1.23E-04 | 7.83E-01 |
| 290.76526 | 49.17  | 18.33 | 18.93 | 19.06 | 18.59 | 6.35E-04 | 9.43E-03 | 7.47E-04 | 5.18E-01 | 9.07E-01 | 3.47E-01 | 9.37E-02 |
| 290.84729 | 44.77  | 20.71 | 22.88 | 22.54 | 22.64 | 4.98E-29 | 3.85E-14 | 7.16E-14 | 7.03E-14 | 2.51E-01 | 5.86E-01 | 9.51E-01 |
| 290.85506 | 48.27  | 16.09 | 17.62 | 17.63 | 17.61 | 1.88E-24 | 7.27E-14 | 7.24E-14 | 7.46E-14 | 1.00E+00 | 1.00E+00 | 1.00E+00 |

|           |        |       |       |       |       |          |          |          |          |          |          |          |
|-----------|--------|-------|-------|-------|-------|----------|----------|----------|----------|----------|----------|----------|
| 290.8653  | 101.83 | 18.08 | 14.84 | 16.52 | 15.24 | 3.53E-12 | 2.26E-11 | 2.45E-03 | 1.01E-08 | 1.41E-03 | 8.32E-01 | 3.00E-02 |
| 290.88313 | 37.94  | 17.57 | 16.77 | 18.09 | 17.39 | 6.90E-10 | 8.81E-05 | 2.05E-02 | 7.81E-01 | 8.05E-11 | 6.88E-03 | 1.72E-03 |
| 290.90715 | 44.57  | 18.56 | 21.66 | 21.37 | 20.89 | 3.06E-58 | 3.65E-14 | 3.65E-14 | 3.65E-14 | 2.33E-01 | 1.16E-05 | 1.24E-02 |
| 290.9278  | 45.66  | 16.90 | 18.21 | 19.55 | 18.39 | 1.64E-28 | 1.01E-09 | 3.65E-14 | 1.93E-11 | 1.62E-09 | 8.44E-01 | 3.28E-07 |
| 290.96413 | 153.38 | 15.31 | 14.20 | 13.44 | 15.29 | 5.01E-05 | 6.02E-02 | 1.78E-04 | 1.00E+00 | 3.46E-01 | 9.43E-02 | 5.57E-04 |
| 290.97943 | 63.35  | 18.09 | 15.72 | 16.78 | 16.08 | 2.09E-12 | 6.18E-12 | 2.09E-04 | 1.21E-08 | 6.00E-03 | 7.01E-01 | 1.45E-01 |
| 290.99036 | 46.76  | 18.70 | 15.70 | 14.84 | 16.22 | 5.40E-18 | 1.46E-11 | 7.46E-14 | 5.43E-08 | 1.64E-01 | 6.15E-01 | 7.13E-03 |
| 291.00496 | 53.73  | 17.03 | 16.62 | 18.44 | 17.32 | 1.40E-15 | 1.86E-01 | 8.69E-11 | 4.76E-01 | 7.48E-14 | 6.21E-03 | 1.55E-06 |
| 291.02159 | 124.36 | 16.22 | 16.75 | 15.62 | 16.70 | 2.55E-05 | 1.35E-01 | 6.70E-02 | 2.33E-01 | 6.23E-05 | 9.97E-01 | 2.39E-04 |
| 291.04734 | 265.89 | 12.32 | 16.29 | 17.57 | 16.12 | 2.59E-55 | 3.65E-14 | 3.65E-14 | 3.65E-14 | 7.25E-06 | 9.20E-01 | 5.95E-07 |
| 291.04947 | 63.76  | 14.48 | 17.60 | 17.25 | 17.28 | 1.04E-15 | 2.79E-13 | 3.70E-11 | 1.08E-10 | 8.09E-01 | 8.57E-01 | 1.00E+00 |
| 291.0547  | 224.41 | 11.88 | 15.91 | 15.62 | 14.70 | 3.22E-26 | 4.83E-14 | 6.69E-14 | 1.87E-12 | 8.56E-01 | 7.71E-03 | 6.55E-02 |
| 291.06459 | 217.97 | 16.60 | 20.00 | 20.52 | 19.27 | 3.00E-26 | 7.25E-14 | 4.14E-14 | 1.79E-12 | 4.38E-01 | 1.74E-01 | 2.83E-03 |
| 291.08383 | 61.05  | 13.43 | 15.83 | 15.50 | 14.64 | 5.78E-05 | 7.93E-05 | 8.43E-04 | 1.33E-01 | 9.29E-01 | 1.58E-01 | 4.30E-01 |
| 291.09047 | 84.19  | 16.07 | 16.05 | 16.14 | 16.57 | 4.92E-01 | 1.00E+00 | 9.98E-01 | 5.30E-01 | 9.95E-01 | 5.17E-01 | 6.59E-01 |
| 291.10256 | 105.68 | 18.16 | 18.95 | 18.49 | 17.87 | 4.31E-04 | 8.30E-03 | 5.24E-01 | 6.73E-01 | 2.70E-01 | 3.07E-04 | 8.22E-02 |
| 291.11806 | 62.66  | 17.99 | 17.12 | 16.61 | 17.54 | 3.79E-04 | 4.05E-02 | 1.79E-04 | 5.38E-01 | 4.33E-01 | 6.14E-01 | 3.68E-02 |
| 291.12991 | 115.74 | 20.24 | 22.14 | 22.71 | 21.88 | 1.78E-17 | 5.44E-11 | 7.29E-14 | 3.18E-08 | 1.45E-01 | 7.98E-01 | 1.55E-02 |
| 291.13927 | 48.78  | 16.99 | 19.44 | 18.42 | 19.29 | 3.75E-16 | 9.26E-14 | 6.05E-06 | 1.86E-12 | 3.80E-03 | 9.57E-01 | 2.47E-02 |
| 291.15497 | 104.19 | 14.72 | 16.36 | 15.95 | 17.02 | 1.49E-11 | 5.85E-07 | 2.46E-04 | 8.41E-12 | 5.37E-01 | 1.63E-01 | 4.34E-03 |
| 291.16902 | 30.14  | 13.58 | 18.68 | 17.26 | 17.61 | 1.82E-25 | 4.16E-14 | 8.60E-14 | 7.38E-14 | 8.43E-03 | 9.71E-02 | 8.60E-01 |
| 291.19528 | 269.73 | 17.13 | 15.61 | 13.41 | 13.52 | 3.81E-21 | 6.58E-04 | 7.36E-14 | 7.46E-14 | 5.10E-07 | 4.34E-06 | 9.94E-01 |
| 291.23128 | 27.67  | 17.06 | 14.02 | 14.71 | 16.20 | 1.90E-14 | 3.27E-13 | 8.44E-09 | 1.15E-01 | 2.87E-01 | 7.61E-07 | 1.18E-03 |
| 291.26795 | 23.26  | 15.94 | 12.07 | 12.64 | 13.70 | 1.27E-18 | 7.57E-14 | 1.85E-13 | 1.15E-06 | 5.22E-01 | 1.10E-03 | 6.40E-02 |
| 291.26816 | 195.47 | 15.48 | 11.72 | 12.35 | 13.36 | 3.03E-09 | 5.32E-09 | 1.17E-06 | 2.88E-03 | 7.16E-01 | 4.45E-02 | 3.67E-01 |
| 291.54673 | 85.79  | 15.80 | 15.97 | 16.84 | 16.51 | 8.72E-05 | 9.07E-01 | 1.49E-04 | 2.63E-02 | 3.11E-03 | 1.55E-01 | 5.67E-01 |
| 291.6181  | 29.13  | 16.56 | 18.72 | 18.46 | 16.96 | 9.54E-23 | 7.45E-14 | 7.96E-14 | 2.90E-01 | 6.61E-01 | 7.62E-12 | 3.58E-09 |
| 291.64692 | 30.4   | 20.15 | 24.50 | 23.34 | 23.97 | 4.22E-56 | 3.65E-14 | 3.65E-14 | 3.65E-14 | 1.29E-06 | 8.68E-02 | 2.56E-02 |
| 291.85058 | 44.57  | 16.27 | 17.45 | 17.04 | 17.45 | 4.45E-11 | 1.40E-09 | 1.13E-04 | 3.88E-09 | 1.10E-01 | 1.00E+00 | 1.27E-01 |
| 291.90672 | 256.7  | 18.05 | 15.80 | 13.05 | 16.48 | 1.01E-23 | 1.47E-06 | 3.92E-14 | 2.03E-03 | 7.40E-09 | 4.28E-01 | 2.45E-12 |
| 291.90848 | 79.71  | 18.26 | 18.35 | 18.22 | 19.01 | 1.70E-01 | 9.95E-01 | 1.00E+00 | 2.10E-01 | 9.86E-01 | 3.47E-01 | 1.88E-01 |
| 291.97504 | 56.55  | 17.32 | 18.50 | 18.03 | 18.37 | 2.62E-11 | 1.23E-10 | 1.68E-04 | 2.66E-08 | 3.09E-02 | 8.76E-01 | 2.13E-01 |
| 291.98933 | 258.68 | 17.37 | 17.80 | 18.06 | 17.50 | 1.05E-02 | 2.05E-01 | 9.06E-03 | 9.35E-01 | 6.54E-01 | 5.74E-01 | 7.55E-02 |
| 291.99953 | 256.02 | 16.46 | 18.47 | 18.22 | 17.48 | 3.10E-23 | 6.36E-14 | 7.65E-14 | 1.70E-06 | 5.43E-01 | 5.30E-06 | 1.07E-03 |
| 292.04948 | 85.56  | 16.02 | 18.23 | 18.06 | 17.59 | 9.24E-24 | 6.61E-14 | 7.32E-14 | 1.39E-11 | 8.47E-01 | 2.08E-02 | 1.45E-01 |
| 292.06754 | 59.98  | 17.89 | 17.32 | 17.93 | 17.60 | 5.11E-02 | 8.26E-02 | 9.99E-01 | 6.38E-01 | 6.75E-02 | 6.86E-01 | 5.68E-01 |
| 292.06769 | 194.98 | 10.57 | 14.78 | 14.37 | 14.56 | 3.36E-25 | 6.78E-14 | 7.29E-14 | 7.43E-14 | 7.50E-01 | 9.50E-01 | 9.72E-01 |
| 292.07326 | 54.74  | 20.36 | 19.46 | 20.66 | 20.19 | 2.34E-08 | 1.51E-05 | 3.55E-01 | 8.02E-01 | 9.15E-09 | 1.63E-03 | 7.33E-02 |
| 292.10237 | 274.89 | 17.74 | 16.97 | 17.96 | 16.90 | 8.96E-08 | 9.79E-04 | 6.92E-01 | 4.42E-04 | 1.78E-05 | 9.91E-01 | 7.79E-06 |
| 292.11399 | 89.49  | 17.64 | 17.88 | 18.12 | 18.11 | 8.46E-03 | 4.28E-01 | 1.34E-02 | 2.18E-02 | 4.56E-01 | 5.20E-01 | 1.00E+00 |
| 292.13166 | 119.41 | 16.93 | 18.64 | 18.58 | 18.44 | 3.42E-12 | 4.34E-10 | 1.31E-09 | 9.38E-08 | 9.95E-01 | 8.65E-01 | 9.49E-01 |
| 292.14845 | 30.46  | 18.47 | 22.79 | 21.59 | 22.20 | 5.36E-53 | 3.65E-14 | 3.65E-14 | 3.65E-14 | 1.62E-06 | 5.55E-02 | 4.78E-02 |
| 292.17666 | 79.43  | 16.06 | 12.62 | 10.99 | 10.73 | 8.73E-16 | 1.14E-06 | 4.95E-13 | 2.76E-13 | 6.49E-02 | 2.91E-02 | 9.80E-01 |
| 292.19608 | 53.27  | 16.55 | 17.93 | 16.05 | 18.55 | 6.19E-09 | 4.23E-03 | 5.97E-01 | 1.54E-05 | 5.47E-05 | 4.67E-01 | 8.34E-08 |
| 292.22705 | 290.92 | 17.99 | 16.76 | 16.94 | 16.80 | 7.24E-09 | 1.57E-07 | 7.55E-06 | 9.15E-07 | 8.46E-01 | 9.97E-01 | 9.32E-01 |
| 292.44306 | 21.22  | 13.64 | 12.57 | 12.70 | 14.13 | 2.09E-03 | 8.10E-02 | 1.48E-01 | 7.02E-01 | 9.92E-01 | 5.99E-03 | 1.31E-02 |
| 292.52169 | 307.23 | 13.02 | 15.77 | 13.57 | 12.11 | 5.89E-20 | 2.08E-13 | 3.52E-01 | 4.06E-02 | 5.77E-09 | 7.12E-14 | 2.58E-04 |
| 292.55045 | 84.08  | 15.04 | 15.20 | 15.40 | 15.44 | 4.86E-01 | 9.48E-01 | 5.77E-01 | 5.27E-01 | 8.94E-01 | 8.53E-01 | 9.99E-01 |
| 292.57839 | 125.01 | 18.99 | 17.81 | 18.50 | 17.55 | 2.35E-14 | 1.28E-09 | 2.78E-02 | 6.51E-13 | 1.11E-03 | 4.92E-01 | 3.90E-06 |
| 292.61844 | 33.34  | 14.28 | 14.89 | 16.75 | 15.78 | 1.25E-07 | 4.70E-01 | 8.32E-08 | 3.62E-03 | 1.58E-04 | 1.97E-01 | 1.32E-01 |
| 292.65471 | 31.41  | 17.27 | 21.68 | 20.26 | 20.98 | 4.79E-55 | 3.65E-14 | 3.65E-14 | 3.65E-14 | 4.36E-09 | 1.30E-02 | 8.71E-03 |
| 292.76271 | 48.26  | 16.08 | 16.76 | 16.58 | 16.22 | 1.30E-02 | 1.51E-02 | 1.24E-01 | 9.32E-01 | 8.52E-01 | 1.09E-01 | 4.40E-01 |
| 292.84529 | 44.67  | 18.99 | 20.98 | 20.66 | 20.83 | 1.96E-26 | 5.12E-14 | 7.42E-14 | 7.41E-14 | 2.99E-01 | 8.39E-01 | 8.20E-01 |
| 292.85212 | 48.27  | 16.52 | 17.28 | 17.22 | 17.37 | 5.08E-11 | 4.00E-08 | 4.04E-07 | 1.60E-09 | 9.62E-01 | 8.89E-01 | 6.27E-01 |
| 292.87782 | 40.4   | 15.68 | 14.97 | 16.44 | 15.23 | 8.73E-03 | 3.59E-01 | 3.09E-01 | 7.48E-01 | 6.65E-03 | 9.39E-01 | 4.67E-02 |
| 292.90546 | 45.2   | 16.45 | 19.26 | 18.95 | 18.51 | 7.28E-47 | 3.65E-14 | 3.65E-14 | 3.70E-14 | 2.27E-01 | 9.11E-05 | 4.93E-02 |
| 292.92562 | 45.48  | 14.68 | 13.39 | 15.45 | 14.81 | 5.47E-07 | 1.45E-03 | 1.13E-01 | 9.83E-01 | 1.31E-07 | 8.26E-04 | 2.94E-01 |
| 292.93992 | 49.65  | 16.00 | 15.24 | 16.01 | 15.82 | 4.77E-03 | 7.83E-03 | 1.00E+00 | 8.82E-01 | 8.33E-03 | 9.37E-02 | 8.66E-01 |
| 292.96731 | 90.88  | 17.10 | 20.38 | 20.72 | 19.55 | 1.31E-24 | 7.57E-14 | 5.47E-14 | 3.83E-11 | 7.36E-01 | 7.97E-02 | 4.11E-03 |
| 293.01135 | 135.51 | 17.81 | 15.94 | 16.10 | 16.97 | 1.79E-10 | 2.48E-09 | 4.12E-08 | 2.41E-02 | 9.44E-01 | 4.25E-03 | 2.15E-02 |
| 293.03395 | 54.84  | 18.30 | 16.53 | 17.09 | 15.57 | 1.05E-14 | 1.11E-07 | 4.45E-04 | 7.82E-14 | 2.74E-01 | 1.58E-02 | 1.84E-05 |
| 293.04048 | 35.36  | 14.17 | 11.89 | 16.07 | 13.81 | 3.14E-25 | 1.49E-10 | 8.47E-08 | 6.94E-01 | 3.70E-14 | 4.13E-07 | 1.54E-09 |
| 293.04769 | 73.63  | 15.10 | 16.65 | 15.67 | 15.36 | 7.67E-07 | 4.12E-07 | 1.60E-01 | 7.92E-01 | 3.97E-03 | 1.08E-04 | 7.10E-01 |
| 293.0627  | 59.62  | 16.75 | 16.63 | 16.36 | 16.00 | 3.61E-03 | 9.33E-01 | 2.17E-01 | 2.84E-03 | 5.71E-01 | 2.40E-02 | 3.67E-01 |
| 293.07334 | 63.57  | 16.62 | 12.30 | 15.51 | 15.06 | 5.27E-13 | 1.98E-13 | 1.47E-01 | 2.20E-02 | 6.53E-08 | 9.15E-06 | 8.48E-01 |
| 293.08421 | 85.55  | 18.05 | 16.92 | 16.76 | 16.75 | 5.06E-04 | 9.40E-03 | 1.82E-03 | 2.56E-03 | 9.72E-01 | 9.68E-01 | 1.00E+00 |
| 293.11929 | 51.16  | 17.28 | 17.84 | 17.05 | 17.66 | 1.82E-03 | 4.92E-02 | 6.86E-01 | 3.18E-01 | 2.19E-03 | 8.60E-01 | 3.52E-02 |
| 293.14594 | 58.66  | 16.94 | 17.23 | 16.77 | 17.06 | 2.51E-01 | 5.86E-01 | 8.61E-01 | 9.59E-01 | 1.93E-01 | 8.93E-01 | 6.08E-01 |

|           |        |       |       |       |       |          |          |          |          |          |          |          |
|-----------|--------|-------|-------|-------|-------|----------|----------|----------|----------|----------|----------|----------|
| 293.15634 | 28.7   | 15.95 | 19.87 | 18.22 | 19.30 | 8.80E-33 | 3.65E-14 | 3.16E-13 | 4.56E-14 | 2.40E-07 | 2.29E-01 | 1.99E-03 |
| 293.17531 | 169.8  | 17.08 | 11.39 | 14.36 | 12.83 | 1.85E-38 | 3.65E-14 | 2.17E-12 | 4.23E-14 | 1.97E-13 | 8.96E-04 | 3.16E-04 |
| 293.17811 | 27.21  | 16.86 | 20.66 | 19.31 | 20.22 | 5.88E-61 | 3.65E-14 | 3.65E-14 | 3.65E-14 | 2.92E-12 | 7.11E-02 | 5.93E-06 |
| 293.1907  | 24.06  | 16.86 | 13.54 | 14.17 | 15.06 | 3.27E-16 | 7.62E-14 | 3.09E-11 | 2.64E-05 | 3.55E-01 | 8.48E-04 | 1.04E-01 |
| 293.21106 | 269.16 | 19.29 | 17.77 | 17.22 | 17.71 | 6.96E-14 | 5.89E-08 | 1.94E-13 | 3.64E-08 | 1.53E-01 | 9.95E-01 | 2.66E-01 |
| 293.22609 | 23.35  | 15.95 | 10.43 | 12.90 | 13.49 | 4.86E-41 | 3.65E-14 | 7.48E-14 | 4.32E-12 | 2.69E-12 | 7.44E-14 | 2.86E-01 |
| 293.24752 | 209.72 | 16.16 | 11.92 | 12.18 | 12.86 | 5.78E-15 | 6.32E-13 | 8.09E-12 | 4.05E-08 | 9.61E-01 | 3.44E-01 | 6.26E-01 |
| 293.55197 | 271.8  | 12.38 | 14.28 | 15.41 | 12.75 | 6.53E-09 | 1.08E-03 | 2.59E-08 | 8.87E-01 | 1.24E-01 | 2.22E-02 | 5.20E-06 |
| 293.55819 | 83.72  | 14.75 | 16.36 | 16.46 | 16.02 | 3.11E-09 | 2.44E-07 | 2.72E-08 | 1.13E-04 | 9.85E-01 | 6.67E-01 | 4.44E-01 |
| 293.64312 | 27.58  | 14.95 | 18.67 | 17.36 | 18.27 | 4.21E-57 | 3.65E-14 | 3.65E-14 | 3.65E-14 | 6.80E-11 | 1.52E-01 | 1.33E-05 |
| 293.66245 | 27.27  | 15.57 | 19.77 | 18.30 | 18.99 | 2.77E-40 | 3.65E-14 | 6.69E-14 | 3.65E-14 | 5.45E-07 | 2.41E-02 | 6.09E-02 |
| 293.84829 | 49.42  | 14.17 | 14.69 | 14.63 | 14.93 | 1.34E-02 | 1.11E-01 | 1.82E-01 | 8.12E-03 | 9.95E-01 | 7.59E-01 | 6.07E-01 |
| 293.90729 | 171.68 | 14.67 | 13.86 | 13.31 | 16.23 | 1.08E-10 | 1.60E-01 | 3.01E-03 | 7.69E-04 | 5.28E-01 | 1.85E-07 | 9.35E-11 |
| 293.92261 | 95.64  | 16.36 | 16.61 | 16.10 | 17.56 | 4.72E-03 | 9.20E-01 | 9.10E-01 | 1.94E-02 | 5.86E-01 | 1.16E-01 | 3.21E-03 |
| 293.94122 | 47.7   | 15.27 | 14.29 | 15.05 | 14.62 | 9.39E-03 | 8.35E-03 | 8.88E-01 | 1.67E-01 | 7.44E-02 | 7.35E-01 | 5.40E-01 |
| 293.9685  | 87.36  | 16.28 | 16.30 | 16.55 | 16.30 | 4.87E-01 | 9.99E-01 | 5.03E-01 | 1.00E+00 | 6.05E-01 | 1.00E+00 | 6.23E-01 |
| 293.97305 | 42.55  | 13.65 | 14.26 | 15.15 | 14.56 | 5.69E-06 | 1.41E-01 | 1.36E-06 | 1.06E-02 | 1.28E-02 | 7.45E-01 | 1.99E-01 |
| 294.06039 | 73.27  | 15.22 | 15.64 | 16.36 | 16.80 | 1.70E-02 | 8.46E-01 | 1.21E-01 | 1.72E-02 | 5.33E-01 | 1.54E-01 | 8.50E-01 |
| 294.09524 | 75.01  | 18.83 | 18.31 | 18.29 | 18.10 | 2.38E-03 | 4.00E-02 | 3.08E-02 | 2.02E-03 | 1.00E+00 | 7.56E-01 | 7.88E-01 |
| 294.14489 | 35.84  | 15.86 | 16.06 | 14.82 | 17.41 | 1.24E-06 | 9.68E-01 | 6.99E-02 | 3.06E-03 | 2.64E-02 | 1.76E-02 | 1.80E-07 |
| 294.16488 | 25.15  | 17.22 | 20.39 | 16.19 | 17.64 | 4.16E-35 | 4.32E-14 | 8.88E-04 | 4.55E-01 | 3.65E-14 | 7.34E-14 | 4.93E-06 |
| 294.1697  | 25.19  | 17.47 | 20.01 | 12.50 | 13.84 | 1.00E-49 | 5.42E-09 | 3.67E-14 | 7.57E-14 | 3.65E-14 | 3.65E-14 | 8.01E-03 |
| 294.18059 | 54.05  | 15.53 | 17.94 | 16.06 | 18.12 | 2.19E-19 | 2.09E-13 | 2.68E-01 | 8.67E-14 | 1.38E-08 | 9.41E-01 | 1.33E-09 |
| 294.18703 | 40.81  | 16.32 | 19.06 | 20.36 | 18.75 | 2.73E-44 | 3.74E-14 | 3.65E-14 | 6.85E-14 | 2.87E-07 | 5.33E-01 | 3.72E-10 |
| 294.2129  | 57.9   | 16.48 | 9.97  | 10.89 | 12.29 | 3.94E-27 | 3.90E-14 | 7.21E-14 | 6.75E-12 | 3.46E-01 | 3.97E-04 | 6.73E-02 |
| 294.21433 | 209.79 | 16.01 | 10.39 | 10.95 | 12.57 | 8.83E-19 | 7.57E-14 | 9.00E-14 | 3.87E-07 | 7.96E-01 | 3.82E-03 | 5.14E-02 |
| 294.54043 | 231.8  | 17.17 | 19.02 | 20.25 | 18.37 | 6.06E-12 | 2.94E-05 | 1.01E-12 | 1.83E-02 | 1.39E-02 | 4.03E-01 | 5.40E-05 |
| 294.58712 | 85.68  | 16.68 | 15.69 | 15.69 | 16.30 | 4.02E-03 | 1.14E-02 | 1.06E-02 | 6.52E-01 | 1.00E+00 | 2.71E-01 | 2.67E-01 |
| 294.64986 | 56.7   | 14.95 | 15.66 | 13.86 | 15.33 | 2.25E-04 | 3.02E-01 | 3.95E-02 | 8.00E-01 | 1.53E-04 | 8.68E-01 | 4.20E-03 |
| 294.67023 | 27.34  | 15.19 | 18.71 | 17.52 | 18.11 | 1.49E-55 | 3.65E-14 | 3.65E-14 | 3.65E-14 | 3.86E-10 | 5.65E-03 | 5.27E-03 |
| 294.68837 | 24.31  | 14.31 | 18.09 | 18.66 | 16.55 | 3.44E-37 | 3.65E-14 | 3.65E-14 | 1.25E-11 | 2.45E-01 | 7.61E-06 | 4.49E-10 |
| 294.84412 | 44.77  | 16.06 | 17.42 | 17.03 | 17.43 | 1.86E-13 | 1.98E-11 | 1.88E-06 | 4.45E-11 | 1.57E-01 | 1.00E+00 | 1.57E-01 |
| 294.85482 | 112.54 | 14.01 | 17.66 | 13.19 | 17.16 | 5.65E-23 | 2.65E-13 | 2.56E-01 | 4.84E-10 | 7.24E-14 | 7.18E-01 | 1.04E-13 |
| 294.86099 | 22.65  | 16.13 | 13.66 | 12.82 | 15.12 | 9.78E-30 | 7.41E-14 | 3.65E-14 | 9.64E-04 | 8.60E-03 | 1.44E-06 | 9.47E-14 |
| 294.89383 | 46.43  | 15.90 | 17.03 | 17.82 | 16.95 | 8.96E-25 | 4.67E-11 | 3.72E-14 | 2.50E-09 | 1.18E-05 | 9.62E-01 | 2.06E-06 |
| 294.93713 | 49.55  | 17.36 | 16.20 | 17.90 | 16.74 | 5.91E-05 | 7.92E-03 | 4.35E-01 | 3.41E-01 | 4.12E-05 | 4.87E-01 | 1.33E-02 |
| 294.96463 | 86.41  | 16.25 | 16.66 | 16.82 | 16.79 | 3.85E-02 | 2.45E-01 | 4.73E-02 | 7.83E-02 | 8.97E-01 | 9.41E-01 | 1.00E+00 |
| 295.00039 | 53     | 22.29 | 23.57 | 23.43 | 22.74 | 1.38E-15 | 2.20E-13 | 2.72E-11 | 2.81E-02 | 8.07E-01 | 6.99E-06 | 2.57E-04 |
| 295.02765 | 60.38  | 16.19 | 15.72 | 17.39 | 17.35 | 4.96E-06 | 5.80E-01 | 5.70E-03 | 1.07E-02 | 7.69E-05 | 1.96E-04 | 1.00E+00 |
| 295.04214 | 246.7  | 14.83 | 14.78 | 17.37 | 15.39 | 4.55E-12 | 9.99E-01 | 1.61E-10 | 4.46E-01 | 2.63E-10 | 3.90E-01 | 3.14E-06 |
| 295.05674 | 60.77  | 17.28 | 15.64 | 16.79 | 15.84 | 1.27E-08 | 1.41E-07 | 2.90E-01 | 7.31E-06 | 6.22E-04 | 9.20E-01 | 8.39E-03 |
| 295.09565 | 91.46  | 16.89 | 17.37 | 19.17 | 19.93 | 2.22E-34 | 1.28E-01 | 7.08E-14 | 3.65E-14 | 7.81E-13 | 6.14E-14 | 6.91E-03 |
| 295.10639 | 73.67  | 15.78 | 16.84 | 17.10 | 16.71 | 6.04E-17 | 2.76E-11 | 7.46E-14 | 1.17E-08 | 3.31E-01 | 8.34E-01 | 6.29E-02 |
| 295.12883 | 43.29  | 18.27 | 17.11 | 17.72 | 17.94 | 4.82E-11 | 8.84E-12 | 2.21E-03 | 1.65E-01 | 8.90E-04 | 4.77E-06 | 5.21E-01 |
| 295.14911 | 45.02  | 16.99 | 10.28 | 9.96  | 12.25 | 4.46E-35 | 3.65E-14 | 3.65E-14 | 7.38E-14 | 9.28E-01 | 2.04E-03 | 1.84E-04 |
| 295.16474 | 33.12  | 15.17 | 18.12 | 17.39 | 17.19 | 3.11E-08 | 2.45E-08 | 3.35E-05 | 3.45E-04 | 4.50E-01 | 2.68E-01 | 9.80E-01 |
| 295.1728  | 26.44  | 15.35 | 17.67 | 17.20 | 17.44 | 2.33E-12 | 5.01E-11 | 1.25E-07 | 7.43E-09 | 4.87E-01 | 9.09E-01 | 8.91E-01 |
| 295.18557 | 26.01  | 14.21 | 17.99 | 17.30 | 16.85 | 2.54E-21 | 7.12E-14 | 8.23E-14 | 9.87E-11 | 2.47E-01 | 1.73E-02 | 6.42E-01 |
| 295.194   | 22.88  | 16.56 | 20.31 | 19.37 | 19.94 | 3.69E-75 | 3.65E-14 | 3.65E-14 | 3.65E-14 | 2.75E-09 | 6.76E-02 | 8.06E-04 |
| 295.22636 | 23.47  | 18.61 | 17.26 | 17.49 | 17.78 | 1.57E-21 | 6.96E-14 | 7.58E-14 | 1.01E-08 | 3.15E-01 | 9.45E-04 | 1.30E-01 |
| 295.22682 | 155.75 | 19.65 | 19.57 | 19.53 | 19.38 | 6.96E-01 | 9.83E-01 | 9.49E-01 | 6.30E-01 | 9.98E-01 | 8.48E-01 | 9.12E-01 |
| 295.49478 | 110.55 | 11.10 | 15.14 | 14.23 | 12.80 | 1.63E-13 | 4.26E-13 | 1.04E-08 | 6.30E-03 | 2.95E-01 | 1.03E-04 | 3.63E-02 |
| 295.59418 | 59.66  | 16.70 | 16.36 | 15.92 | 16.32 | 1.04E-01 | 6.94E-01 | 5.85E-02 | 6.29E-01 | 5.15E-01 | 9.99E-01 | 6.19E-01 |
| 295.65803 | 26.73  | 14.37 | 17.69 | 18.30 | 17.33 | 1.04E-24 | 7.28E-14 | 5.03E-14 | 1.74E-13 | 3.31E-01 | 7.57E-01 | 4.31E-02 |
| 295.67841 | 38.25  | 14.96 | 17.87 | 16.44 | 17.77 | 4.06E-28 | 4.12E-14 | 3.31E-08 | 5.65E-14 | 2.79E-07 | 9.82E-01 | 3.56E-06 |
| 295.93171 | 51.65  | 19.49 | 20.92 | 21.06 | 20.45 | 4.61E-16 | 2.36E-12 | 8.54E-14 | 4.68E-06 | 8.77E-01 | 8.60E-02 | 1.10E-02 |
| 295.96053 | 90.55  | 15.15 | 16.28 | 15.56 | 16.51 | 7.99E-03 | 4.60E-02 | 7.74E-01 | 1.20E-02 | 3.62E-01 | 9.54E-01 | 1.50E-01 |
| 296.00247 | 53.34  | 17.42 | 18.51 | 18.42 | 17.91 | 1.08E-11 | 2.55E-10 | 4.41E-09 | 1.50E-02 | 9.47E-01 | 1.97E-03 | 1.07E-02 |
| 296.02117 | 89.35  | 17.88 | 16.09 | 17.13 | 17.09 | 2.95E-05 | 5.30E-06 | 1.41E-01 | 1.34E-01 | 2.40E-02 | 4.03E-02 | 1.00E+00 |
| 296.0292  | 297.12 | 11.64 | 15.63 | 16.02 | 14.04 | 2.59E-48 | 3.65E-14 | 3.65E-14 | 7.61E-14 | 4.06E-01 | 2.59E-08 | 3.03E-12 |
| 296.02968 | 36.27  | 15.89 | 17.62 | 17.72 | 17.69 | 9.41E-21 | 8.12E-14 | 7.49E-14 | 7.78E-14 | 9.61E-01 | 9.87E-01 | 9.99E-01 |
| 296.05687 | 27.29  | 14.75 | 20.43 | 19.38 | 19.32 | 3.13E-47 | 3.65E-14 | 3.65E-14 | 3.65E-14 | 7.67E-03 | 6.49E-03 | 9.99E-01 |
| 296.05744 | 89.58  | 19.22 | 15.02 | 14.61 | 14.09 | 6.23E-21 | 3.25E-13 | 7.43E-14 | 7.52E-14 | 8.65E-01 | 3.32E-01 | 7.80E-01 |
| 296.06593 | 78.76  | 24.84 | 26.71 | 26.04 | 26.04 | 1.37E-13 | 1.05E-13 | 9.17E-07 | 2.16E-06 | 1.73E-02 | 2.39E-02 | 1.00E+00 |
| 296.09641 | 67.7   | 18.87 | 19.45 | 19.44 | 19.59 | 3.92E-02 | 1.37E-01 | 1.35E-01 | 4.34E-02 | 1.00E+00 | 9.55E-01 | 9.50E-01 |
| 296.14603 | 27.13  | 20.74 | 17.40 | 17.29 | 17.96 | 1.09E-46 | 3.65E-14 | 3.65E-14 | 3.65E-14 | 9.55E-01 | 5.18E-02 | 1.17E-02 |
| 296.15942 | 26.42  | 14.83 | 13.18 | 17.20 | 14.83 | 6.71E-13 | 3.33E-03 | 4.86E-06 | 1.00E+00 | 1.35E-13 | 6.42E-03 | 1.80E-05 |
| 296.18561 | 165.11 | 18.11 | 15.77 | 15.38 | 16.20 | 1.44E-32 | 4.41E-14 | 3.65E-14 | 7.43E-14 | 2.29E-01 | 1.84E-01 | 7.45E-04 |

|           |        |       |       |       |       |          |          |          |          |          |          |          |
|-----------|--------|-------|-------|-------|-------|----------|----------|----------|----------|----------|----------|----------|
| 296.19754 | 27.55  | 14.61 | 17.57 | 15.50 | 17.11 | 1.84E-20 | 7.61E-14 | 1.71E-02 | 3.99E-13 | 1.42E-09 | 4.92E-01 | 5.40E-06 |
| 296.22978 | 22.18  | 16.85 | 12.81 | 13.63 | 14.81 | 1.02E-60 | 3.65E-14 | 3.65E-14 | 5.32E-14 | 6.52E-05 | 7.03E-14 | 9.33E-09 |
| 296.23006 | 175.37 | 18.19 | 15.68 | 15.29 | 16.11 | 2.78E-31 | 5.05E-14 | 3.65E-14 | 7.39E-14 | 3.00E-01 | 2.65E-01 | 2.66E-03 |
| 296.25824 | 20.65  | 16.24 | 13.13 | 13.47 | 13.78 | 3.86E-41 | 3.65E-14 | 3.65E-14 | 3.87E-14 | 3.37E-01 | 1.17E-02 | 4.47E-01 |
| 296.2584  | 174.56 | 16.76 | 14.68 | 14.50 | 14.94 | 2.58E-13 | 4.33E-10 | 9.12E-12 | 1.21E-07 | 9.41E-01 | 8.42E-01 | 5.09E-01 |
| 296.59767 | 63.43  | 16.53 | 15.70 | 15.74 | 15.64 | 1.11E-02 | 3.48E-02 | 4.51E-02 | 2.52E-02 | 9.99E-01 | 9.98E-01 | 9.91E-01 |
| 296.62165 | 24.64  | 15.02 | 17.12 | 15.02 | 16.99 | 2.71E-12 | 3.10E-08 | 1.00E+00 | 4.93E-07 | 6.07E-08 | 9.83E-01 | 8.43E-07 |
| 296.64785 | 28.67  | 19.11 | 13.49 | 15.45 | 15.86 | 2.86E-25 | 3.72E-14 | 3.12E-13 | 2.62E-10 | 2.10E-04 | 9.75E-06 | 8.29E-01 |
| 296.6658  | 26.32  | 15.85 | 14.60 | 17.12 | 15.31 | 1.72E-11 | 8.45E-04 | 6.12E-04 | 3.52E-01 | 5.45E-12 | 1.74E-01 | 1.38E-06 |
| 296.80021 | 47.47  | 17.06 | 18.30 | 18.32 | 17.97 | 3.05E-19 | 7.47E-14 | 7.45E-14 | 4.56E-09 | 9.98E-01 | 1.22E-01 | 7.86E-02 |
| 296.90864 | 38.46  | 15.20 | 15.45 | 17.74 | 16.79 | 2.00E-16 | 8.33E-01 | 8.49E-14 | 3.21E-06 | 1.10E-11 | 2.18E-04 | 1.38E-02 |
| 296.93569 | 48.89  | 15.70 | 16.29 | 17.50 | 17.09 | 2.11E-21 | 4.88E-03 | 7.16E-14 | 1.68E-12 | 5.23E-10 | 1.15E-04 | 1.13E-01 |
| 296.96111 | 46.02  | 16.77 | 15.11 | 16.55 | 16.46 | 1.01E-15 | 8.23E-14 | 6.52E-01 | 4.00E-01 | 2.62E-11 | 1.31E-09 | 9.72E-01 |
| 296.9715  | 25.6   | 15.44 | 19.38 | 13.21 | 13.44 | 1.19E-57 | 3.65E-14 | 2.08E-12 | 8.99E-10 | 3.65E-14 | 3.65E-14 | 8.81E-01 |
| 296.98769 | 68.57  | 18.42 | 17.78 | 17.87 | 16.48 | 8.34E-08 | 1.54E-01 | 2.66E-01 | 1.68E-08 | 9.91E-01 | 4.71E-04 | 1.28E-04 |
| 296.99613 | 53.09  | 18.83 | 19.83 | 19.77 | 19.02 | 2.19E-13 | 2.94E-10 | 2.84E-09 | 6.04E-01 | 9.70E-01 | 1.42E-06 | 9.14E-06 |
| 297.0067  | 75.17  | 18.67 | 19.40 | 20.29 | 19.17 | 3.76E-18 | 6.31E-05 | 7.29E-14 | 1.49E-02 | 1.18E-06 | 5.46E-01 | 2.03E-09 |
| 297.04683 | 59.34  | 16.79 | 15.32 | 14.67 | 15.47 | 5.35E-07 | 6.25E-04 | 1.73E-07 | 3.73E-03 | 3.18E-01 | 9.81E-01 | 1.71E-01 |
| 297.06382 | 75.26  | 16.43 | 16.29 | 15.84 | 15.92 | 5.87E-02 | 9.39E-01 | 7.85E-02 | 1.91E-01 | 2.93E-01 | 5.05E-01 | 9.89E-01 |
| 297.06931 | 77.8   | 21.00 | 23.22 | 22.50 | 22.24 | 1.39E-16 | 7.43E-14 | 4.62E-09 | 3.86E-06 | 1.52E-02 | 5.72E-04 | 7.15E-01 |
| 297.14532 | 37.6   | 18.02 | 17.60 | 17.62 | 17.24 | 2.23E-03 | 1.38E-01 | 1.63E-01 | 7.23E-04 | 1.00E+00 | 3.03E-01 | 2.52E-01 |
| 297.16599 | 31.88  | 15.77 | 18.07 | 17.33 | 17.99 | 4.20E-37 | 3.65E-14 | 7.49E-14 | 3.65E-14 | 6.06E-05 | 9.67E-01 | 6.39E-04 |
| 297.17832 | 50.8   | 15.62 | 15.81 | 16.08 | 16.62 | 1.01E-02 | 9.11E-01 | 3.90E-01 | 6.20E-03 | 8.13E-01 | 5.24E-02 | 3.11E-01 |
| 297.20598 | 215.55 | 16.47 | 13.59 | 13.22 | 14.25 | 1.09E-09 | 2.78E-07 | 4.10E-09 | 1.85E-04 | 8.91E-01 | 6.10E-01 | 2.16E-01 |
| 297.24207 | 282.73 | 22.15 | 22.29 | 21.79 | 22.44 | 3.06E-01 | 9.78E-01 | 7.02E-01 | 8.45E-01 | 4.77E-01 | 9.76E-01 | 2.66E-01 |
| 297.27837 | 23.89  | 15.13 | 9.57  | 7.95  | 14.30 | 4.51E-38 | 6.05E-14 | 3.65E-14 | 3.86E-01 | 1.13E-02 | 7.57E-14 | 4.01E-14 |
| 297.54576 | 278.71 | 17.87 | 18.58 | 20.06 | 19.36 | 2.37E-18 | 1.06E-02 | 7.47E-14 | 4.03E-09 | 5.11E-09 | 6.12E-03 | 1.97E-02 |
| 297.66312 | 30.3   | 17.19 | 19.74 | 19.73 | 19.05 | 1.42E-39 | 3.65E-14 | 3.65E-14 | 7.16E-14 | 1.00E+00 | 1.26E-03 | 1.54E-03 |
| 297.90375 | 99     | 15.66 | 15.10 | 17.36 | 15.31 | 1.50E-09 | 3.82E-01 | 8.83E-06 | 7.71E-01 | 7.46E-09 | 9.39E-01 | 3.64E-07 |
| 297.9267  | 32.68  | 18.27 | 19.31 | 19.47 | 19.00 | 7.94E-13 | 2.16E-09 | 3.53E-12 | 6.90E-05 | 7.52E-01 | 2.50E-01 | 2.50E-02 |
| 297.97152 | 56.88  | 17.59 | 17.58 | 18.02 | 17.01 | 1.23E-02 | 1.00E+00 | 4.24E-01 | 1.96E-01 | 4.24E-01 | 2.40E-01 | 4.69E-03 |
| 298.0247  | 51.63  | 16.61 | 15.86 | 15.98 | 16.44 | 2.85E-03 | 5.80E-03 | 2.86E-02 | 8.88E-01 | 9.50E-01 | 7.40E-02 | 2.19E-01 |
| 298.03603 | 108.42 | 14.69 | 14.70 | 13.23 | 13.91 | 1.50E-06 | 1.00E+00 | 9.72E-06 | 5.61E-02 | 1.72E-05 | 6.26E-02 | 1.37E-01 |
| 298.06404 | 78.26  | 20.77 | 22.93 | 22.20 | 21.98 | 1.29E-17 | 7.41E-14 | 1.88E-09 | 1.12E-06 | 8.03E-03 | 3.88E-04 | 7.73E-01 |
| 298.06999 | 75.3   | 18.02 | 19.74 | 18.93 | 18.87 | 1.74E-12 | 1.82E-13 | 1.16E-04 | 5.51E-04 | 1.05E-03 | 7.11E-04 | 9.96E-01 |
| 298.0779  | 235.13 | 17.03 | 20.99 | 21.40 | 20.16 | 3.84E-29 | 5.47E-14 | 3.72E-14 | 8.50E-14 | 6.78E-01 | 1.23E-01 | 5.67E-03 |
| 298.09675 | 95.75  | 23.32 | 24.78 | 24.98 | 24.56 | 1.21E-12 | 3.09E-09 | 1.12E-11 | 1.04E-06 | 8.18E-01 | 7.99E-01 | 2.90E-01 |
| 298.12086 | 31.81  | 16.20 | 17.49 | 18.92 | 18.36 | 3.12E-24 | 7.91E-07 | 4.52E-14 | 7.47E-14 | 1.08E-07 | 3.88E-03 | 1.17E-01 |
| 298.16475 | 33.53  | 15.90 | 18.25 | 17.28 | 17.55 | 7.20E-17 | 7.23E-14 | 3.50E-07 | 3.19E-09 | 9.17E-04 | 4.04E-02 | 7.17E-01 |
| 298.18745 | 83.29  | 14.16 | 19.19 | 18.61 | 18.45 | 1.82E-17 | 7.69E-14 | 1.32E-12 | 3.50E-11 | 7.63E-01 | 6.21E-01 | 9.93E-01 |
| 298.20131 | 182.59 | 17.87 | 15.30 | 15.31 | 15.81 | 1.50E-37 | 3.65E-14 | 3.65E-14 | 6.16E-14 | 1.00E+00 | 4.40E-02 | 4.56E-02 |
| 298.2455  | 289.69 | 19.61 | 18.61 | 18.32 | 18.75 | 8.78E-05 | 3.57E-03 | 5.54E-05 | 2.19E-02 | 7.46E-01 | 9.66E-01 | 4.67E-01 |
| 298.27376 | 22.77  | 19.15 | 18.50 | 18.41 | 18.52 | 2.38E-07 | 2.85E-05 | 1.10E-06 | 8.83E-05 | 9.22E-01 | 9.99E-01 | 8.75E-01 |
| 298.274   | 154.15 | 18.29 | 16.41 | 16.78 | 17.00 | 3.89E-23 | 5.78E-14 | 7.49E-14 | 1.70E-11 | 1.41E-01 | 6.68E-03 | 6.23E-01 |
| 298.53772 | 96.51  | 14.22 | 13.76 | 16.90 | 15.04 | 1.86E-10 | 7.33E-01 | 4.35E-08 | 2.89E-01 | 5.05E-10 | 3.84E-02 | 6.18E-04 |
| 298.56985 | 239.95 | 21.33 | 24.27 | 24.84 | 23.62 | 4.72E-22 | 7.45E-14 | 6.63E-14 | 8.21E-10 | 3.28E-01 | 2.57E-01 | 3.02E-03 |
| 298.5799  | 239.41 | 14.71 | 16.68 | 16.71 | 16.63 | 6.31E-07 | 2.03E-05 | 1.17E-05 | 5.93E-05 | 1.00E+00 | 9.99E-01 | 9.98E-01 |
| 298.60406 | 59.26  | 17.35 | 17.79 | 17.94 | 17.66 | 4.89E-01 | 6.83E-01 | 4.31E-01 | 8.63E-01 | 9.82E-01 | 9.91E-01 | 9.10E-01 |
| 298.62257 | 31.95  | 15.32 | 14.45 | 16.87 | 16.73 | 1.48E-16 | 1.27E-02 | 6.12E-07 | 1.44E-05 | 1.30E-13 | 5.29E-12 | 9.67E-01 |
| 298.79738 | 47.53  | 17.29 | 18.40 | 18.42 | 18.07 | 8.45E-17 | 1.39E-13 | 9.64E-14 | 2.25E-07 | 1.00E+00 | 9.83E-02 | 7.63E-02 |
| 298.8418  | 45.78  | 16.26 | 16.68 | 17.35 | 16.23 | 1.31E-10 | 6.01E-02 | 2.06E-09 | 9.98E-01 | 7.23E-04 | 5.64E-02 | 6.45E-09 |
| 298.94777 | 44.49  | 16.71 | 16.63 | 17.99 | 16.78 | 6.57E-12 | 9.77E-01 | 1.26E-09 | 9.87E-01 | 4.48E-10 | 8.91E-01 | 6.07E-08 |
| 298.98389 | 245.77 | 20.40 | 19.88 | 20.38 | 20.45 | 4.01E-01 | 4.78E-01 | 1.00E+00 | 9.99E-01 | 5.30E-01 | 4.54E-01 | 9.98E-01 |
| 298.99304 | 253.83 | 17.24 | 16.29 | 17.55 | 17.04 | 2.34E-03 | 2.14E-02 | 7.70E-01 | 9.33E-01 | 1.23E-03 | 1.38E-01 | 4.44E-01 |
| 299.00029 | 65.06  | 16.32 | 13.43 | 13.41 | 15.39 | 1.95E-11 | 6.88E-09 | 3.87E-09 | 1.88E-01 | 1.00E+00 | 3.95E-04 | 2.92E-04 |
| 299.05599 | 211.85 | 18.92 | 21.23 | 21.55 | 20.99 | 1.19E-18 | 2.74E-13 | 7.52E-14 | 1.15E-10 | 6.83E-01 | 8.51E-01 | 2.32E-01 |
| 299.06136 | 24.18  | 16.08 | 12.40 | 14.04 | 14.01 | 5.40E-20 | 6.54E-14 | 3.77E-08 | 8.21E-08 | 2.64E-05 | 6.74E-05 | 1.00E+00 |
| 299.06773 | 74.98  | 17.42 | 19.09 | 16.99 | 17.84 | 2.03E-10 | 2.16E-07 | 4.38E-01 | 5.09E-01 | 1.54E-10 | 4.11E-04 | 3.05E-02 |
| 299.07177 | 222.58 | 15.75 | 22.27 | 23.15 | 20.62 | 5.04E-39 | 3.65E-14 | 3.65E-14 | 7.38E-14 | 2.83E-01 | 7.76E-03 | 7.03E-06 |
| 299.08206 | 212.61 | 14.91 | 16.41 | 14.17 | 14.48 | 3.26E-03 | 7.59E-02 | 6.12E-01 | 9.02E-01 | 2.64E-03 | 1.82E-02 | 9.63E-01 |
| 299.08365 | 106.92 | 19.56 | 19.67 | 19.25 | 20.06 | 4.47E-03 | 9.54E-01 | 4.45E-01 | 9.51E-02 | 2.10E-01 | 2.95E-01 | 1.66E-03 |
| 299.09439 | 94.92  | 15.63 | 18.14 | 18.43 | 17.83 | 1.86E-10 | 9.38E-08 | 1.61E-09 | 6.35E-06 | 9.09E-01 | 9.04E-01 | 5.39E-01 |
| 299.10004 | 272.94 | 16.22 | 17.43 | 17.62 | 16.43 | 6.00E-06 | 8.63E-04 | 6.45E-05 | 9.18E-01 | 9.36E-01 | 1.49E-02 | 2.07E-03 |
| 299.10235 | 65.31  | 21.26 | 22.31 | 22.48 | 22.34 | 4.32E-18 | 3.48E-12 | 7.45E-14 | 2.99E-12 | 6.08E-01 | 9.96E-01 | 7.58E-01 |
| 299.12637 | 168.2  | 17.87 | 16.50 | 16.48 | 16.80 | 3.03E-19 | 7.63E-14 | 7.34E-14 | 5.71E-10 | 9.98E-01 | 2.64E-01 | 1.91E-01 |
| 299.12713 | 21.6   | 16.72 | 14.94 | 15.55 | 16.20 | 6.51E-11 | 5.36E-11 | 2.07E-05 | 1.72E-01 | 7.40E-02 | 1.61E-05 | 6.54E-02 |
| 299.13715 | 42.53  | 16.57 | 15.69 | 15.19 | 15.52 | 8.22E-03 | 1.50E-01 | 5.20E-03 | 6.92E-02 | 6.45E-01 | 9.81E-01 | 8.74E-01 |
| 299.15041 | 26.73  | 12.43 | 17.39 | 16.56 | 12.37 | 2.08E-12 | 5.65E-09 | 1.18E-06 | 1.00E+00 | 7.21E-01 | 2.68E-08 | 3.64E-06 |

|           |        |       |       |       |       |          |          |          |          |          |          |          |
|-----------|--------|-------|-------|-------|-------|----------|----------|----------|----------|----------|----------|----------|
| 299.18531 | 207.47 | 15.98 | 12.82 | 14.02 | 14.12 | 1.17E-05 | 2.94E-06 | 7.36E-03 | 1.76E-02 | 2.22E-01 | 1.83E-01 | 9.98E-01 |
| 299.19045 | 74.39  | 14.84 | 15.76 | 13.55 | 15.77 | 2.14E-06 | 1.59E-01 | 1.84E-02 | 1.69E-01 | 1.13E-05 | 1.00E+00 | 1.73E-05 |
| 299.20022 | 25.53  | 19.41 | 17.12 | 18.12 | 19.00 | 1.59E-15 | 7.82E-14 | 9.34E-06 | 4.47E-01 | 1.31E-03 | 5.87E-10 | 8.45E-03 |
| 299.22165 | 214.32 | 16.86 | 14.25 | 14.13 | 14.41 | 5.08E-19 | 9.40E-14 | 7.41E-14 | 2.05E-12 | 9.81E-01 | 9.56E-01 | 8.10E-01 |
| 299.25773 | 285.68 | 21.87 | 22.03 | 21.52 | 21.78 | 7.11E-01 | 9.83E-01 | 8.45E-01 | 9.97E-01 | 6.57E-01 | 9.48E-01 | 9.39E-01 |
| 299.27719 | 22.91  | 16.70 | 14.77 | 14.67 | 15.35 | 1.86E-27 | 5.74E-14 | 4.16E-14 | 8.08E-12 | 9.45E-01 | 9.61E-03 | 1.38E-03 |
| 299.51627 | 298.97 | 16.58 | 17.79 | 17.47 | 15.58 | 1.06E-15 | 9.41E-06 | 1.84E-03 | 4.84E-04 | 5.73E-01 | 8.86E-14 | 2.13E-11 |
| 299.56794 | 236.44 | 16.25 | 20.87 | 21.48 | 20.01 | 9.28E-34 | 3.85E-14 | 3.65E-14 | 7.54E-14 | 3.99E-01 | 1.47E-01 | 1.68E-03 |
| 299.58366 | 122.17 | 17.14 | 16.83 | 17.62 | 17.36 | 1.81E-02 | 5.98E-01 | 2.01E-01 | 8.15E-01 | 1.07E-02 | 1.80E-01 | 7.48E-01 |
| 299.63288 | 28.61  | 19.35 | 12.96 | 14.87 | 15.44 | 4.80E-32 | 3.65E-14 | 7.27E-14 | 9.59E-14 | 2.68E-04 | 2.29E-06 | 6.13E-01 |
| 299.64453 | 27.77  | 15.50 | 18.05 | 15.24 | 16.34 | 3.49E-16 | 4.17E-13 | 8.46E-01 | 5.25E-02 | 8.03E-14 | 4.45E-06 | 6.49E-03 |
| 299.69977 | 55.33  | 16.13 | 16.65 | 16.81 | 16.30 | 3.19E-03 | 4.66E-02 | 4.05E-03 | 8.50E-01 | 8.73E-01 | 3.33E-01 | 7.25E-02 |
| 299.90137 | 120.43 | 16.70 | 17.31 | 16.32 | 17.56 | 3.25E-07 | 3.28E-02 | 2.97E-01 | 1.13E-03 | 1.07E-04 | 7.05E-01 | 1.26E-06 |
| 299.93116 | 110.93 | 14.64 | 14.28 | 14.81 | 14.60 | 5.85E-01 | 7.79E-01 | 9.65E-01 | 1.00E+00 | 5.12E-01 | 8.48E-01 | 9.52E-01 |
| 299.93963 | 77.86  | 16.18 | 17.77 | 16.99 | 17.59 | 4.46E-14 | 5.24E-13 | 3.26E-04 | 3.20E-10 | 9.66E-04 | 8.28E-01 | 2.31E-02 |
| 299.96258 | 23.67  | 15.11 | 13.72 | 14.40 | 13.73 | 4.37E-11 | 1.73E-09 | 4.26E-03 | 4.89E-09 | 9.92E-03 | 1.00E+00 | 1.32E-02 |
| 299.9774  | 47.62  | 16.93 | 16.63 | 17.01 | 17.17 | 2.35E-03 | 1.15E-01 | 9.42E-01 | 3.15E-01 | 3.38E-02 | 1.12E-03 | 6.59E-01 |
| 300.03822 | 97.8   | 14.00 | 12.95 | 16.33 | 14.03 | 3.70E-09 | 1.49E-01 | 2.24E-05 | 1.00E+00 | 1.30E-09 | 1.73E-01 | 8.86E-05 |
| 300.0483  | 212.21 | 15.58 | 15.10 | 15.88 | 16.86 | 6.35E-07 | 3.48E-01 | 7.39E-01 | 1.54E-04 | 4.82E-02 | 1.98E-07 | 7.58E-03 |
| 300.0594  | 194.9  | 14.67 | 16.15 | 16.29 | 16.61 | 1.22E-08 | 3.44E-05 | 3.68E-06 | 5.86E-08 | 9.73E-01 | 5.06E-01 | 7.59E-01 |
| 300.07183 | 231.16 | 14.55 | 16.88 | 16.50 | 15.61 | 2.09E-07 | 3.83E-07 | 2.50E-05 | 6.56E-02 | 8.04E-01 | 2.24E-02 | 1.82E-01 |
| 300.09273 | 94.44  | 17.92 | 20.08 | 20.44 | 19.80 | 1.32E-16 | 8.72E-12 | 7.63E-14 | 6.54E-09 | 6.25E-01 | 7.94E-01 | 1.56E-01 |
| 300.10477 | 78.88  | 15.39 | 16.08 | 15.90 | 16.00 | 1.94E-01 | 1.99E-01 | 4.45E-01 | 3.21E-01 | 9.61E-01 | 9.97E-01 | 9.93E-01 |
| 300.13472 | 29.83  | 17.87 | 12.81 | 13.61 | 15.03 | 5.68E-43 | 3.65E-14 | 3.65E-14 | 7.47E-14 | 5.10E-02 | 2.18E-10 | 6.19E-05 |
| 300.16439 | 29.63  | 15.79 | 17.63 | 17.93 | 17.50 | 1.66E-24 | 7.36E-14 | 5.65E-14 | 8.67E-14 | 4.33E-01 | 9.18E-01 | 1.49E-01 |
| 300.18025 | 26.42  | 17.22 | 15.59 | 15.95 | 15.91 | 1.80E-17 | 7.41E-14 | 5.95E-11 | 6.44E-11 | 1.98E-01 | 3.33E-01 | 9.96E-01 |
| 300.20037 | 25.7   | 18.95 | 16.57 | 16.74 | 17.65 | 1.09E-27 | 4.12E-14 | 5.65E-14 | 1.07E-08 | 8.55E-01 | 5.14E-06 | 1.33E-04 |
| 300.21655 | 23.8   | 17.22 | 16.04 | 16.18 | 16.74 | 2.27E-11 | 2.82E-10 | 2.27E-08 | 3.16E-02 | 8.44E-01 | 8.40E-04 | 1.19E-02 |
| 300.26113 | 284.02 | 19.84 | 18.59 | 18.14 | 18.26 | 2.17E-08 | 1.69E-04 | 1.15E-07 | 2.06E-06 | 4.57E-01 | 7.14E-01 | 9.83E-01 |
| 300.28945 | 22.68  | 20.70 | 19.55 | 19.65 | 20.29 | 9.03E-21 | 7.45E-14 | 7.52E-14 | 5.88E-03 | 8.47E-01 | 1.03E-07 | 4.16E-06 |
| 300.49915 | 30.41  | 14.63 | 13.25 | 16.80 | 16.48 | 5.37E-20 | 9.79E-04 | 3.74E-08 | 8.24E-06 | 7.34E-14 | 1.03E-13 | 8.29E-01 |
| 300.54464 | 57.43  | 15.37 | 16.29 | 15.96 | 16.12 | 5.66E-02 | 4.69E-02 | 3.34E-01 | 1.65E-01 | 7.93E-01 | 9.68E-01 | 9.72E-01 |
| 300.57575 | 303.3  | 15.24 | 14.66 | 14.71 | 14.31 | 9.10E-05 | 1.64E-02 | 3.10E-02 | 2.99E-05 | 9.95E-01 | 3.20E-01 | 2.06E-01 |
| 300.64075 | 28.82  | 17.50 | 12.83 | 13.20 | 13.51 | 8.95E-82 | 3.65E-14 | 3.65E-14 | 3.65E-14 | 1.37E-01 | 8.37E-04 | 2.81E-01 |
| 300.65276 | 26.42  | 15.48 | 18.13 | 13.91 | 16.51 | 2.87E-28 | 9.36E-14 | 5.09E-06 | 7.69E-03 | 3.65E-14 | 1.11E-05 | 6.90E-13 |
| 300.79453 | 47.57  | 15.82 | 16.68 | 16.54 | 16.40 | 2.60E-07 | 4.12E-07 | 2.57E-05 | 1.60E-03 | 8.08E-01 | 3.28E-01 | 8.36E-01 |
| 300.83906 | 45.75  | 15.82 | 15.93 | 16.90 | 16.01 | 1.55E-08 | 9.29E-01 | 4.51E-08 | 7.52E-01 | 2.46E-06 | 9.80E-01 | 2.73E-05 |
| 300.88384 | 48.4   | 15.24 | 15.70 | 15.91 | 16.02 | 2.67E-03 | 1.54E-01 | 1.13E-02 | 3.31E-03 | 7.77E-01 | 5.08E-01 | 9.65E-01 |
| 300.93798 | 36.82  | 13.12 | 13.42 | 11.95 | 13.75 | 1.45E-05 | 8.37E-01 | 5.48E-03 | 3.17E-01 | 4.21E-04 | 8.18E-01 | 1.53E-05 |
| 300.96332 | 35.12  | 14.81 | 14.90 | 16.67 | 14.40 | 1.58E-09 | 9.93E-01 | 5.65E-07 | 6.47E-01 | 4.86E-06 | 5.08E-01 | 7.20E-09 |
| 300.98495 | 76.56  | 15.66 | 17.87 | 18.26 | 17.49 | 1.04E-10 | 1.29E-07 | 3.05E-10 | 2.93E-05 | 7.43E-01 | 7.78E-01 | 2.13E-01 |
| 301.01691 | 87.64  | 19.21 | 24.14 | 24.26 | 23.10 | 7.57E-36 | 3.65E-14 | 3.65E-14 | 7.27E-14 | 9.87E-01 | 4.08E-02 | 1.53E-02 |
| 301.05471 | 59.02  | 18.33 | 18.86 | 18.61 | 18.50 | 3.76E-04 | 1.23E-04 | 8.81E-02 | 4.92E-01 | 2.06E-01 | 3.38E-02 | 8.33E-01 |
| 301.08383 | 75.92  | 15.77 | 14.15 | 16.00 | 14.66 | 8.30E-06 | 3.44E-04 | 9.40E-01 | 3.29E-02 | 5.17E-05 | 6.24E-01 | 7.88E-03 |
| 301.09494 | 291.95 | 14.47 | 14.83 | 15.43 | 14.26 | 2.74E-05 | 4.39E-01 | 4.27E-04 | 8.29E-01 | 7.25E-02 | 1.15E-01 | 3.45E-05 |
| 301.11442 | 57.89  | 17.04 | 17.25 | 17.09 | 16.59 | 1.63E-02 | 7.14E-01 | 9.96E-01 | 1.19E-01 | 8.45E-01 | 9.67E-03 | 8.24E-02 |
| 301.14079 | 50.37  | 17.89 | 15.82 | 16.24 | 16.51 | 8.74E-25 | 4.41E-14 | 7.26E-14 | 5.98E-12 | 9.97E-02 | 2.09E-03 | 5.02E-01 |
| 301.15142 | 63.67  | 18.01 | 20.07 | 19.79 | 19.66 | 4.97E-30 | 3.70E-14 | 5.83E-14 | 7.37E-14 | 3.48E-01 | 8.76E-02 | 8.71E-01 |
| 301.17141 | 47.41  | 16.59 | 17.53 | 18.20 | 17.43 | 6.40E-14 | 5.50E-06 | 7.93E-14 | 9.86E-05 | 3.28E-03 | 9.58E-01 | 7.05E-04 |
| 301.17981 | 212.68 | 16.51 | 9.94  | 11.27 | 12.73 | 1.95E-31 | 3.65E-14 | 5.83E-14 | 3.47E-12 | 3.73E-02 | 7.23E-07 | 2.23E-02 |
| 301.20126 | 22.87  | 12.62 | 10.02 | 14.14 | 12.73 | 5.02E-12 | 4.21E-06 | 1.44E-02 | 9.96E-01 | 7.73E-13 | 5.93E-06 | 4.28E-02 |
| 301.21533 | 24.4   | 20.16 | 18.23 | 19.13 | 19.58 | 3.37E-16 | 7.49E-14 | 5.45E-06 | 3.28E-02 | 1.92E-04 | 1.99E-08 | 1.63E-01 |
| 301.21616 | 169.51 | 17.84 | 15.67 | 16.41 | 16.14 | 2.18E-19 | 7.47E-14 | 1.27E-09 | 3.15E-12 | 5.26E-03 | 1.81E-01 | 6.14E-01 |
| 301.29284 | 23.28  | 18.10 | 16.22 | 16.53 | 17.40 | 3.41E-31 | 3.65E-14 | 5.81E-14 | 2.18E-05 | 1.57E-01 | 2.37E-12 | 1.81E-07 |
| 301.5178  | 86.27  | 15.74 | 17.94 | 17.61 | 17.60 | 2.99E-17 | 7.74E-14 | 6.35E-12 | 4.10E-11 | 5.76E-01 | 5.74E-01 | 1.00E+00 |
| 301.8767  | 45.58  | 19.10 | 20.94 | 21.23 | 20.47 | 8.35E-33 | 4.16E-14 | 3.65E-14 | 8.69E-14 | 2.68E-01 | 2.58E-02 | 3.70E-05 |
| 301.90172 | 33.06  | 19.28 | 12.95 | 14.26 | 14.43 | 1.18E-48 | 3.65E-14 | 3.65E-14 | 3.65E-14 | 1.27E-03 | 3.47E-04 | 9.66E-01 |
| 301.9739  | 63.28  | 15.71 | 14.54 | 14.47 | 14.62 | 6.23E-02 | 1.22E-01 | 8.62E-02 | 1.90E-01 | 9.99E-01 | 9.99E-01 | 9.93E-01 |
| 301.98616 | 259.13 | 16.42 | 15.81 | 14.99 | 14.46 | 7.70E-07 | 3.08E-01 | 3.69E-04 | 1.12E-06 | 1.13E-01 | 2.38E-03 | 4.92E-01 |
| 302.01798 | 106.76 | 17.26 | 20.87 | 21.08 | 20.25 | 7.77E-41 | 3.65E-14 | 3.65E-14 | 4.36E-14 | 8.34E-01 | 9.37E-02 | 9.23E-03 |
| 302.04064 | 99.24  | 17.19 | 15.16 | 13.89 | 15.40 | 3.02E-15 | 4.63E-07 | 7.45E-14 | 1.99E-05 | 4.28E-03 | 9.23E-01 | 5.82E-04 |
| 302.06978 | 277.81 | 16.00 | 13.26 | 12.67 | 14.24 | 3.29E-09 | 2.12E-06 | 4.35E-09 | 6.55E-03 | 6.87E-01 | 2.87E-01 | 2.31E-02 |
| 302.12463 | 38.45  | 18.21 | 13.28 | 13.52 | 15.08 | 1.14E-28 | 3.90E-14 | 4.56E-14 | 1.58E-11 | 9.43E-01 | 2.85E-04 | 2.00E-03 |
| 302.13461 | 57.33  | 17.22 | 17.49 | 17.47 | 16.99 | 5.98E-03 | 2.72E-01 | 3.38E-01 | 4.64E-01 | 9.99E-01 | 1.09E-02 | 1.54E-02 |
| 302.15561 | 67.14  | 9.05  | 14.25 | 11.62 | 13.62 | 4.38E-15 | 1.27E-13 | 2.57E-04 | 8.08E-11 | 3.27E-04 | 7.76E-01 | 1.38E-02 |
| 302.16101 | 25.69  | 14.35 | 16.74 | 15.03 | 17.05 | 5.99E-11 | 1.39E-07 | 3.41E-01 | 5.82E-09 | 4.21E-04 | 8.89E-01 | 3.10E-05 |
| 302.17568 | 29.2   | 15.30 | 18.83 | 17.58 | 18.09 | 9.21E-49 | 3.65E-14 | 3.72E-14 | 3.65E-14 | 2.17E-09 | 1.30E-03 | 4.52E-02 |
| 302.19603 | 27.05  | 19.96 | 20.16 | 20.06 | 19.70 | 2.28E-03 | 3.02E-01 | 8.06E-01 | 1.38E-01 | 8.36E-01 | 1.32E-03 | 1.80E-02 |

|           |        |       |       |       |       |          |          |          |          |          |          |          |
|-----------|--------|-------|-------|-------|-------|----------|----------|----------|----------|----------|----------|----------|
| 302.21893 | 23.84  | 18.14 | 18.00 | 16.80 | 18.38 | 5.70E-13 | 9.06E-01 | 7.60E-10 | 6.36E-01 | 9.40E-08 | 2.82E-01 | 7.76E-12 |
| 302.2322  | 23.52  | 16.90 | 14.12 | 15.15 | 16.55 | 3.77E-22 | 7.18E-14 | 1.63E-09 | 5.89E-01 | 1.19E-03 | 8.16E-14 | 6.60E-06 |
| 302.30511 | 23.22  | 18.37 | 17.46 | 17.54 | 17.77 | 5.15E-11 | 5.96E-10 | 8.91E-09 | 1.09E-04 | 9.52E-01 | 1.33E-01 | 3.38E-01 |
| 302.51784 | 85.71  | 15.45 | 16.14 | 15.64 | 15.74 | 3.78E-02 | 2.13E-02 | 8.58E-01 | 6.47E-01 | 1.68E-01 | 3.78E-01 | 9.79E-01 |
| 302.5306  | 30.26  | 15.33 | 12.50 | 16.25 | 15.54 | 1.12E-29 | 7.42E-14 | 5.80E-03 | 8.81E-01 | 3.65E-14 | 7.25E-14 | 7.87E-02 |
| 302.67744 | 27.79  | 15.64 | 17.38 | 15.62 | 16.51 | 3.04E-08 | 3.43E-07 | 1.00E+00 | 3.62E-02 | 4.96E-07 | 3.93E-02 | 3.65E-02 |
| 302.71953 | 23.09  | 14.97 | 16.65 | 11.78 | 15.65 | 6.70E-28 | 6.41E-05 | 8.22E-14 | 2.85E-01 | 3.67E-14 | 5.88E-02 | 7.45E-14 |
| 302.74534 | 51.72  | 19.55 | 19.85 | 19.93 | 19.30 | 3.89E-04 | 2.14E-01 | 6.01E-02 | 3.77E-01 | 9.49E-01 | 4.58E-03 | 6.19E-04 |
| 302.88075 | 49.13  | 14.90 | 14.94 | 15.27 | 15.57 | 8.20E-06 | 9.92E-01 | 3.53E-02 | 2.36E-05 | 8.88E-02 | 1.38E-04 | 1.70E-01 |
| 302.88509 | 43.77  | 15.83 | 14.08 | 14.14 | 13.84 | 2.41E-05 | 5.81E-04 | 8.40E-04 | 1.08E-04 | 9.99E-01 | 9.58E-01 | 9.21E-01 |
| 302.906   | 45.58  | 19.05 | 17.69 | 18.45 | 17.97 | 2.24E-15 | 8.30E-14 | 9.35E-04 | 8.20E-10 | 2.34E-05 | 3.61E-01 | 1.74E-02 |
| 302.92556 | 46.52  | 14.65 | 17.11 | 17.81 | 17.05 | 1.54E-11 | 3.33E-07 | 3.06E-11 | 1.26E-06 | 3.98E-01 | 9.99E-01 | 3.52E-01 |
| 302.93729 | 21.32  | 18.00 | 14.67 | 14.93 | 15.74 | 1.27E-40 | 3.65E-14 | 3.65E-14 | 7.32E-14 | 6.37E-01 | 2.41E-05 | 2.13E-03 |
| 302.96046 | 55.94  | 16.87 | 11.18 | 11.81 | 14.27 | 6.71E-60 | 3.65E-14 | 3.65E-14 | 7.55E-14 | 9.77E-02 | 5.83E-14 | 7.57E-14 |
| 302.97079 | 67.95  | 18.05 | 18.57 | 20.71 | 19.70 | 1.75E-30 | 5.14E-02 | 3.65E-14 | 7.54E-13 | 7.29E-14 | 2.18E-06 | 2.26E-05 |
| 302.99927 | 92.48  | 16.53 | 18.72 | 19.11 | 17.81 | 5.77E-21 | 8.24E-14 | 7.27E-14 | 9.25E-06 | 4.38E-01 | 4.60E-03 | 1.19E-05 |
| 303.01456 | 87.02  | 17.19 | 21.06 | 21.30 | 20.24 | 5.52E-40 | 3.65E-14 | 3.65E-14 | 6.07E-14 | 8.28E-01 | 2.38E-02 | 1.44E-03 |
| 303.0213  | 92.22  | 13.81 | 18.26 | 18.43 | 17.19 | 1.64E-30 | 3.94E-14 | 3.72E-14 | 7.67E-14 | 9.69E-01 | 3.70E-02 | 9.48E-03 |
| 303.03858 | 51.57  | 15.21 | 14.86 | 14.11 | 14.23 | 7.14E-05 | 5.48E-01 | 1.92E-04 | 1.96E-03 | 2.78E-02 | 1.08E-01 | 9.70E-01 |
| 303.04739 | 274.81 | 15.97 | 19.71 | 19.91 | 18.58 | 6.52E-49 | 3.65E-14 | 3.65E-14 | 4.79E-14 | 8.06E-01 | 1.59E-05 | 1.89E-07 |
| 303.1574  | 57.31  | 15.19 | 14.92 | 16.07 | 14.70 | 5.74E-03 | 9.05E-01 | 1.05E-01 | 6.28E-01 | 2.30E-02 | 9.54E-01 | 5.63E-03 |
| 303.16638 | 62.07  | 17.09 | 18.63 | 18.73 | 17.52 | 2.11E-17 | 1.82E-12 | 1.31E-13 | 1.63E-01 | 9.67E-01 | 1.49E-06 | 1.24E-07 |
| 303.17775 | 76.58  | 16.65 | 18.13 | 17.92 | 17.93 | 1.32E-15 | 1.71E-13 | 7.33E-11 | 3.09E-10 | 6.79E-01 | 7.04E-01 | 1.00E+00 |
| 303.19534 | 209    | 16.24 | 10.65 | 8.37  | 11.34 | 2.66E-37 | 5.38E-14 | 3.65E-14 | 7.52E-14 | 8.01E-05 | 5.60E-01 | 2.83E-07 |
| 303.19773 | 26.4   | 17.05 | 16.32 | 17.64 | 16.11 | 5.98E-13 | 1.42E-03 | 1.54E-02 | 3.26E-05 | 2.48E-09 | 7.50E-01 | 1.79E-01 |
| 303.21711 | 22.77  | 14.68 | 16.92 | 18.38 | 17.09 | 2.25E-34 | 7.56E-14 | 3.65E-14 | 7.47E-14 | 1.29E-07 | 9.13E-01 | 6.72E-06 |
| 303.2263  | 22.5   | 14.90 | 17.93 | 13.77 | 16.76 | 2.99E-24 | 1.13E-13 | 1.02E-02 | 6.41E-06 | 5.34E-14 | 1.36E-02 | 1.02E-12 |
| 303.23144 | 24.25  | 22.70 | 20.95 | 21.97 | 22.55 | 7.78E-14 | 3.61E-13 | 4.08E-03 | 8.95E-01 | 5.02E-05 | 2.74E-10 | 5.65E-02 |
| 303.30855 | 22.8   | 15.59 | 13.12 | 13.45 | 14.12 | 1.51E-16 | 7.61E-14 | 2.47E-12 | 3.93E-06 | 6.55E-01 | 4.77E-03 | 1.06E-01 |
| 303.46741 | 307.2  | 15.05 | 15.23 | 14.63 | 14.18 | 9.47E-06 | 8.23E-01 | 1.66E-01 | 2.78E-04 | 2.47E-02 | 1.46E-05 | 1.56E-01 |
| 303.54642 | 257.64 | 13.99 | 13.14 | 15.32 | 13.92 | 1.55E-03 | 3.84E-01 | 6.35E-02 | 9.99E-01 | 5.62E-04 | 5.11E-01 | 6.65E-02 |
| 303.64685 | 27.13  | 18.53 | 23.01 | 21.98 | 22.82 | 5.97E-66 | 3.65E-14 | 3.65E-14 | 3.65E-14 | 3.53E-06 | 7.98E-01 | 3.41E-04 |
| 303.72775 | 22.62  | 16.30 | 15.62 | 12.68 | 16.15 | 2.23E-23 | 1.97E-01 | 6.63E-14 | 9.74E-01 | 1.03E-13 | 4.64E-01 | 7.41E-14 |
| 303.86044 | 44.59  | 15.93 | 16.20 | 15.08 | 16.37 | 1.65E-05 | 7.24E-01 | 6.71E-03 | 3.54E-01 | 2.40E-04 | 9.28E-01 | 2.72E-05 |
| 303.87392 | 50.36  | 18.18 | 20.45 | 20.71 | 19.95 | 3.55E-29 | 5.74E-14 | 3.70E-14 | 1.04E-13 | 5.81E-01 | 9.90E-02 | 2.45E-03 |
| 303.90137 | 20.87  | 16.35 | 13.91 | 13.31 | 14.06 | 1.23E-12 | 3.20E-08 | 3.67E-12 | 4.55E-07 | 4.57E-01 | 9.86E-01 | 2.84E-01 |
| 303.95273 | 257.12 | 12.01 | 14.73 | 13.72 | 13.10 | 9.15E-04 | 3.62E-04 | 4.89E-02 | 3.79E-01 | 4.55E-01 | 1.01E-01 | 8.13E-01 |
| 303.97019 | 47.71  | 15.84 | 16.15 | 16.81 | 16.41 | 2.24E-06 | 2.92E-01 | 6.90E-07 | 1.18E-02 | 2.42E-03 | 5.44E-01 | 1.42E-01 |
| 303.98049 | 297.44 | 14.84 | 15.38 | 15.73 | 13.83 | 1.38E-09 | 1.86E-01 | 5.89E-03 | 2.01E-03 | 6.04E-01 | 9.35E-07 | 1.21E-09 |
| 304.01942 | 89.92  | 16.98 | 20.83 | 20.89 | 19.73 | 2.61E-33 | 3.67E-14 | 3.65E-14 | 7.54E-14 | 9.97E-01 | 3.69E-03 | 1.60E-03 |
| 304.02696 | 90.36  | 14.01 | 19.25 | 19.14 | 17.56 | 9.94E-46 | 3.65E-14 | 3.65E-14 | 6.05E-14 | 9.85E-01 | 5.51E-06 | 2.18E-05 |
| 304.03232 | 90.2   | 12.97 | 17.76 | 16.58 | 16.75 | 3.25E-51 | 3.65E-14 | 3.65E-14 | 3.65E-14 | 3.44E-05 | 8.77E-04 | 9.17E-01 |
| 304.04447 | 81.29  | 17.77 | 12.76 | 14.02 | 14.93 | 1.91E-34 | 3.65E-14 | 5.36E-14 | 2.08E-13 | 2.05E-03 | 3.60E-08 | 5.22E-02 |
| 304.0789  | 161.4  | 15.16 | 15.05 | 15.05 | 15.47 | 2.67E-01 | 9.62E-01 | 9.59E-01 | 5.42E-01 | 1.00E+00 | 3.00E-01 | 2.88E-01 |
| 304.10018 | 106.87 | 9.64  | 13.15 | 9.73  | 12.84 | 9.41E-22 | 7.66E-14 | 9.96E-01 | 1.61E-12 | 1.25E-13 | 8.90E-01 | 1.59E-11 |
| 304.13999 | 25.82  | 15.78 | 17.13 | 13.88 | 14.08 | 1.66E-54 | 1.87E-13 | 4.16E-14 | 7.39E-14 | 3.65E-14 | 3.65E-14 | 6.23E-01 |
| 304.14906 | 35.82  | 17.34 | 21.32 | 20.41 | 21.18 | 4.37E-59 | 3.65E-14 | 3.65E-14 | 3.65E-14 | 4.88E-05 | 9.07E-01 | 1.17E-03 |
| 304.16151 | 76     | 17.37 | 19.54 | 19.54 | 19.26 | 1.22E-24 | 7.07E-14 | 7.16E-14 | 7.65E-14 | 1.00E+00 | 5.86E-01 | 5.67E-01 |
| 304.21169 | 27.34  | 20.57 | 22.21 | 21.27 | 20.82 | 2.39E-19 | 7.26E-14 | 1.22E-04 | 4.33E-01 | 3.13E-07 | 3.65E-13 | 4.52E-02 |
| 304.23475 | 24.1   | 20.52 | 18.43 | 19.63 | 20.19 | 7.51E-18 | 7.48E-14 | 2.91E-04 | 4.42E-01 | 1.07E-06 | 4.07E-12 | 7.24E-02 |
| 304.2352  | 174.53 | 18.37 | 16.23 | 16.96 | 16.69 | 1.34E-23 | 5.01E-14 | 7.97E-12 | 8.00E-14 | 1.11E-03 | 1.05E-01 | 5.04E-01 |
| 304.26346 | 163.98 | 17.50 | 16.15 | 14.44 | 16.34 | 3.03E-20 | 2.03E-05 | 6.10E-14 | 5.15E-04 | 7.81E-08 | 9.22E-01 | 5.58E-09 |
| 304.29952 | 22.84  | 17.90 | 16.42 | 16.82 | 17.49 | 3.02E-07 | 5.02E-07 | 3.26E-04 | 4.41E-01 | 4.76E-01 | 1.13E-03 | 7.78E-02 |
| 304.47894 | 121.9  | 12.52 | 14.59 | 13.83 | 12.54 | 2.20E-06 | 1.68E-05 | 1.29E-02 | 1.00E+00 | 3.12E-01 | 6.68E-05 | 2.48E-02 |
| 304.52772 | 85.41  | 15.77 | 17.24 | 17.06 | 16.62 | 3.25E-13 | 2.69E-12 | 5.53E-10 | 1.31E-04 | 7.84E-01 | 1.25E-02 | 1.30E-01 |
| 304.58692 | 93.82  | 17.64 | 11.38 | 12.54 | 12.31 | 4.66E-73 | 3.65E-14 | 3.65E-14 | 3.65E-14 | 3.03E-05 | 1.79E-03 | 8.20E-01 |
| 304.6546  | 27.01  | 17.30 | 21.33 | 20.00 | 20.45 | 4.65E-45 | 3.65E-14 | 3.87E-14 | 3.65E-14 | 2.01E-07 | 1.73E-03 | 2.38E-01 |
| 304.7425  | 49.66  | 20.13 | 20.44 | 20.51 | 19.91 | 5.50E-05 | 9.41E-02 | 2.34E-02 | 3.62E-01 | 9.60E-01 | 1.13E-03 | 1.49E-04 |
| 304.89098 | 304.54 | 14.56 | 16.10 | 13.97 | 14.08 | 7.71E-22 | 4.10E-12 | 1.92E-02 | 9.92E-02 | 7.27E-14 | 7.43E-14 | 9.56E-01 |
| 304.90317 | 48.52  | 17.71 | 15.92 | 16.74 | 16.49 | 5.10E-15 | 7.54E-14 | 1.28E-05 | 7.78E-08 | 4.73E-04 | 3.64E-02 | 6.38E-01 |
| 304.95565 | 60.33  | 21.43 | 18.44 | 18.89 | 20.04 | 1.12E-50 | 3.65E-14 | 3.65E-14 | 8.47E-14 | 2.66E-02 | 7.55E-14 | 2.60E-01 |
| 304.98878 | 94.52  | 17.73 | 19.24 | 19.01 | 18.76 | 1.24E-07 | 2.35E-07 | 1.28E-05 | 1.21E-03 | 8.29E-01 | 3.12E-01 | 7.99E-01 |
| 305.0007  | 283.92 | 17.52 | 15.26 | 15.77 | 16.59 | 1.57E-05 | 1.40E-05 | 1.12E-03 | 2.14E-01 | 7.09E-01 | 3.78E-02 | 3.39E-01 |
| 305.01617 | 69.83  | 17.66 | 19.37 | 19.73 | 18.91 | 2.20E-21 | 8.22E-14 | 6.92E-14 | 2.19E-08 | 2.98E-01 | 1.21E-01 | 6.05E-04 |
| 305.02812 | 88.99  | 17.71 | 20.17 | 19.30 | 19.40 | 2.45E-26 | 3.70E-14 | 2.26E-13 | 1.17E-13 | 1.47E-04 | 1.58E-03 | 9.64E-01 |
| 305.06739 | 67.48  | 14.20 | 14.48 | 15.22 | 15.74 | 6.12E-05 | 8.40E-01 | 1.47E-02 | 9.51E-05 | 1.52E-01 | 3.26E-03 | 4.66E-01 |
| 305.06777 | 267.77 | 11.38 | 13.80 | 13.75 | 13.52 | 7.94E-06 | 6.61E-05 | 8.53E-05 | 8.30E-04 | 1.00E+00 | 9.60E-01 | 9.78E-01 |
| 305.10886 | 113.88 | 15.52 | 16.22 | 16.00 | 15.76 | 1.32E-02 | 8.85E-03 | 1.27E-01 | 7.11E-01 | 7.57E-01 | 2.00E-01 | 7.31E-01 |

|           |        |       |       |       |       |          |          |          |          |          |          |          |
|-----------|--------|-------|-------|-------|-------|----------|----------|----------|----------|----------|----------|----------|
| 305.12799 | 62.17  | 15.39 | 14.52 | 16.05 | 13.91 | 2.41E-14 | 3.08E-03 | 4.12E-02 | 1.22E-07 | 4.85E-08 | 9.39E-02 | 1.92E-13 |
| 305.14573 | 87.97  | 16.42 | 17.41 | 17.84 | 17.88 | 3.28E-08 | 9.14E-04 | 4.45E-07 | 6.01E-07 | 3.62E-01 | 3.21E-01 | 9.99E-01 |
| 305.15663 | 36.17  | 17.80 | 19.64 | 18.35 | 19.34 | 2.20E-27 | 4.16E-14 | 2.31E-03 | 7.47E-14 | 4.12E-13 | 2.77E-01 | 4.21E-08 |
| 305.17308 | 45.26  | 16.91 | 12.21 | 11.91 | 11.64 | 2.13E-16 | 2.92E-11 | 1.16E-12 | 5.64E-13 | 9.69E-01 | 8.41E-01 | 9.79E-01 |
| 305.21405 | 29.07  | 17.89 | 19.18 | 18.24 | 17.76 | 7.14E-14 | 1.45E-11 | 1.88E-01 | 8.76E-01 | 1.60E-06 | 2.16E-12 | 4.50E-02 |
| 305.23848 | 24.17  | 16.36 | 12.34 | 14.42 | 15.51 | 2.12E-18 | 7.36E-14 | 1.61E-05 | 1.81E-01 | 6.28E-06 | 1.72E-11 | 5.36E-02 |
| 305.24703 | 28.12  | 22.40 | 20.23 | 21.16 | 21.31 | 2.32E-25 | 3.70E-14 | 4.75E-11 | 1.93E-08 | 1.84E-06 | 8.61E-08 | 8.60E-01 |
| 305.30309 | 22.37  | 14.99 | 12.51 | 13.18 | 14.16 | 1.05E-09 | 1.40E-09 | 1.15E-05 | 1.37E-01 | 2.96E-01 | 2.46E-04 | 6.31E-02 |
| 305.63384 | 27.71  | 15.42 | 16.62 | 17.10 | 14.85 | 4.96E-15 | 7.61E-05 | 7.75E-09 | 1.65E-01 | 2.89E-01 | 1.44E-08 | 4.75E-13 |
| 305.64343 | 27.13  | 15.45 | 17.15 | 15.35 | 17.19 | 2.44E-14 | 1.35E-08 | 9.87E-01 | 1.60E-08 | 5.09E-09 | 9.99E-01 | 6.07E-09 |
| 305.66243 | 27.11  | 16.72 | 20.17 | 18.56 | 19.01 | 1.83E-22 | 4.72E-14 | 1.94E-08 | 1.62E-11 | 2.60E-06 | 2.00E-03 | 4.87E-01 |
| 305.85824 | 44.63  | 14.45 | 14.34 | 13.36 | 15.04 | 1.04E-07 | 9.76E-01 | 2.09E-04 | 1.33E-01 | 1.70E-03 | 6.23E-02 | 2.70E-08 |
| 305.87094 | 49.75  | 15.31 | 17.92 | 18.27 | 17.49 | 2.08E-32 | 4.19E-14 | 3.65E-14 | 7.45E-14 | 4.23E-01 | 2.63E-01 | 5.53E-03 |
| 305.91848 | 117.51 | 14.10 | 18.88 | 13.18 | 18.05 | 1.90E-18 | 2.67E-11 | 4.89E-01 | 8.24E-08 | 9.07E-14 | 6.26E-01 | 9.94E-11 |
| 305.96033 | 54.39  | 22.59 | 22.29 | 22.03 | 21.64 | 1.09E-05 | 3.62E-01 | 1.24E-02 | 4.13E-06 | 5.10E-01 | 4.26E-03 | 1.60E-01 |
| 305.99118 | 261.45 | 14.85 | 14.79 | 15.83 | 14.75 | 9.39E-06 | 9.92E-01 | 2.06E-04 | 9.71E-01 | 1.18E-04 | 9.98E-01 | 9.23E-05 |
| 306.01702 | 90.09  | 13.92 | 17.41 | 17.29 | 16.43 | 8.77E-32 | 3.67E-14 | 3.72E-14 | 7.52E-14 | 9.73E-01 | 5.16E-03 | 1.76E-02 |
| 306.03373 | 84.7   | 13.72 | 17.48 | 17.35 | 15.97 | 1.98E-27 | 4.45E-14 | 5.16E-14 | 7.74E-10 | 9.78E-01 | 1.06E-04 | 4.43E-04 |
| 306.04092 | 42.49  | 12.59 | 9.12  | 10.45 | 15.12 | 1.67E-67 | 3.65E-14 | 7.47E-14 | 6.16E-14 | 2.26E-07 | 3.65E-14 | 3.65E-14 |
| 306.04849 | 280.19 | 17.77 | 18.19 | 18.25 | 18.15 | 1.03E-01 | 2.07E-01 | 1.08E-01 | 3.02E-01 | 9.92E-01 | 9.99E-01 | 9.72E-01 |
| 306.05848 | 119.53 | 10.15 | 13.87 | 11.14 | 13.73 | 1.96E-23 | 7.28E-14 | 4.00E-02 | 7.37E-14 | 9.72E-11 | 9.84E-01 | 2.11E-09 |
| 306.0768  | 218.33 | 19.46 | 21.01 | 21.89 | 21.31 | 1.34E-08 | 5.06E-04 | 7.42E-09 | 3.34E-05 | 1.17E-01 | 8.83E-01 | 4.76E-01 |
| 306.07766 | 59.66  | 21.83 | 22.74 | 23.11 | 22.60 | 1.88E-08 | 6.41E-05 | 6.57E-09 | 1.56E-03 | 2.94E-01 | 9.09E-01 | 8.13E-02 |
| 306.09311 | 96.52  | 17.79 | 19.09 | 18.93 | 19.04 | 3.08E-20 | 7.43E-14 | 1.70E-13 | 7.96E-14 | 6.88E-01 | 9.86E-01 | 8.86E-01 |
| 306.12966 | 89.67  | 19.28 | 20.26 | 20.44 | 20.47 | 5.69E-11 | 1.03E-06 | 4.72E-09 | 7.47E-09 | 7.80E-01 | 7.19E-01 | 9.99E-01 |
| 306.16139 | 43.59  | 15.04 | 18.50 | 16.63 | 17.80 | 3.60E-24 | 4.74E-14 | 1.56E-06 | 7.65E-14 | 3.89E-08 | 1.32E-01 | 1.58E-03 |
| 306.24273 | 289.81 | 17.61 | 17.09 | 17.09 | 16.69 | 7.23E-05 | 3.21E-02 | 2.98E-02 | 1.87E-05 | 1.00E+00 | 1.79E-01 | 1.73E-01 |
| 306.25048 | 23.45  | 20.23 | 17.67 | 18.76 | 18.98 | 4.95E-34 | 3.65E-14 | 7.49E-14 | 3.56E-11 | 5.54E-09 | 1.53E-11 | 6.03E-01 |
| 306.25079 | 149.83 | 18.86 | 16.75 | 17.56 | 17.78 | 4.37E-20 | 6.52E-14 | 9.38E-10 | 1.24E-06 | 4.76E-04 | 8.07E-06 | 6.93E-01 |
| 306.52597 | 94.32  | 17.30 | 12.14 | 14.12 | 13.31 | 7.78E-34 | 3.65E-14 | 7.41E-14 | 6.07E-14 | 7.57E-07 | 1.11E-02 | 1.30E-01 |
| 306.57729 | 279.89 | 14.61 | 18.65 | 19.02 | 16.73 | 3.12E-30 | 4.67E-14 | 3.67E-14 | 9.68E-08 | 7.37E-01 | 3.59E-06 | 1.83E-08 |
| 306.63425 | 33.06  | 14.40 | 13.94 | 15.54 | 15.48 | 4.27E-05 | 6.22E-01 | 1.44E-02 | 3.07E-02 | 3.23E-04 | 9.64E-04 | 9.99E-01 |
| 306.73971 | 50.98  | 19.36 | 19.56 | 19.67 | 19.09 | 1.22E-04 | 3.79E-01 | 6.73E-02 | 1.53E-01 | 8.42E-01 | 2.55E-03 | 1.01E-04 |
| 306.74725 | 302.85 | 15.45 | 20.42 | 20.05 | 18.27 | 4.64E-56 | 3.65E-14 | 3.65E-14 | 5.63E-14 | 4.53E-01 | 1.72E-13 | 4.13E-10 |
| 306.82886 | 47.62  | 16.34 | 17.39 | 17.38 | 17.19 | 6.21E-17 | 1.29E-13 | 1.32E-13 | 2.28E-09 | 1.00E+00 | 4.34E-01 | 4.77E-01 |
| 306.85494 | 45.58  | 17.42 | 16.66 | 17.84 | 17.31 | 8.39E-09 | 9.61E-05 | 7.20E-02 | 9.31E-01 | 1.24E-09 | 2.40E-03 | 2.15E-02 |
| 306.89992 | 36.86  | 17.36 | 21.33 | 22.31 | 20.42 | 6.36E-40 | 3.65E-14 | 3.65E-14 | 7.39E-14 | 1.19E-02 | 2.68E-02 | 9.94E-08 |
| 306.92972 | 242.01 | 15.96 | 17.04 | 16.95 | 17.01 | 1.87E-03 | 5.73E-03 | 1.26E-02 | 9.94E-03 | 9.93E-01 | 1.00E+00 | 9.98E-01 |
| 306.95959 | 57.67  | 19.22 | 17.15 | 16.01 | 17.52 | 1.14E-22 | 1.56E-11 | 4.45E-14 | 7.33E-08 | 6.14E-04 | 5.86E-01 | 3.87E-06 |
| 306.99552 | 74.35  | 16.43 | 16.74 | 17.08 | 15.20 | 6.53E-03 | 9.36E-01 | 6.01E-01 | 1.04E-01 | 9.23E-01 | 3.05E-02 | 4.28E-03 |
| 307.035   | 66.64  | 18.15 | 22.20 | 22.01 | 20.71 | 3.40E-48 | 3.65E-14 | 3.65E-14 | 6.47E-14 | 8.65E-01 | 3.64E-08 | 1.34E-06 |
| 307.04389 | 42.7   | 26.14 | 26.51 | 26.96 | 27.04 | 1.00E-04 | 3.10E-01 | 8.52E-04 | 3.18E-04 | 1.75E-01 | 8.94E-02 | 9.81E-01 |
| 307.07528 | 237.77 | 15.35 | 16.86 | 15.89 | 16.44 | 9.40E-03 | 6.80E-03 | 6.49E-01 | 9.99E-02 | 1.68E-01 | 8.29E-01 | 6.57E-01 |
| 307.0763  | 67.42  | 12.34 | 11.91 | 11.33 | 12.51 | 5.94E-03 | 5.84E-01 | 1.81E-02 | 9.67E-01 | 3.69E-01 | 3.56E-01 | 7.51E-03 |
| 307.08322 | 223.94 | 22.57 | 29.61 | 29.99 | 28.54 | 9.26E-40 | 3.65E-14 | 3.65E-14 | 4.30E-14 | 8.82E-01 | 1.81E-01 | 3.11E-02 |
| 307.16679 | 45.75  | 19.05 | 17.62 | 17.48 | 17.95 | 3.64E-28 | 6.12E-14 | 3.83E-14 | 2.23E-13 | 6.88E-01 | 8.17E-02 | 3.27E-03 |
| 307.18906 | 46.81  | 17.56 | 16.26 | 16.16 | 16.48 | 1.94E-13 | 2.20E-10 | 6.38E-12 | 3.35E-07 | 9.56E-01 | 6.72E-01 | 3.60E-01 |
| 307.19273 | 221.95 | 11.90 | 12.72 | 10.31 | 13.46 | 1.59E-10 | 2.24E-01 | 1.19E-03 | 2.56E-03 | 5.71E-07 | 3.59E-01 | 1.48E-10 |
| 307.22279 | 30.03  | 18.28 | 21.83 | 20.52 | 19.92 | 5.52E-27 | 3.65E-14 | 1.76E-13 | 1.34E-07 | 3.18E-05 | 2.01E-09 | 1.61E-01 |
| 307.23747 | 22.01  | 13.83 | 11.90 | 15.88 | 15.04 | 5.45E-28 | 7.57E-09 | 5.45E-10 | 7.91E-04 | 3.67E-14 | 7.59E-14 | 4.46E-02 |
| 307.25399 | 23.75  | 16.69 | 10.98 | 12.46 | 13.78 | 8.58E-50 | 3.65E-14 | 3.65E-14 | 7.59E-14 | 8.55E-06 | 7.52E-14 | 1.37E-04 |
| 307.26276 | 23.6   | 18.93 | 16.30 | 17.06 | 17.49 | 1.54E-35 | 3.65E-14 | 5.81E-14 | 2.06E-13 | 1.29E-04 | 2.45E-09 | 8.58E-02 |
| 307.26302 | 161.39 | 18.39 | 16.16 | 16.71 | 17.04 | 4.80E-25 | 3.96E-14 | 7.51E-14 | 1.31E-10 | 2.53E-02 | 9.90E-05 | 3.44E-01 |
| 307.4135  | 302.94 | 14.98 | 16.27 | 15.93 | 14.84 | 1.12E-12 | 4.43E-09 | 2.02E-05 | 9.15E-01 | 3.38E-01 | 9.53E-10 | 3.72E-06 |
| 307.5837  | 243.49 | 24.16 | 27.32 | 27.64 | 26.75 | 3.97E-23 | 7.38E-14 | 6.87E-14 | 4.36E-12 | 7.94E-01 | 3.50E-01 | 5.31E-02 |
| 307.74643 | 302.31 | 14.84 | 15.02 | 14.90 | 14.49 | 2.39E-01 | 8.88E-01 | 9.96E-01 | 5.24E-01 | 9.63E-01 | 1.90E-01 | 4.09E-01 |
| 307.90519 | 43.37  | 13.62 | 15.56 | 17.96 | 15.26 | 3.64E-19 | 2.99E-05 | 6.78E-14 | 8.96E-04 | 3.09E-07 | 9.01E-01 | 1.68E-08 |
| 307.91627 | 35.6   | 16.55 | 13.78 | 14.65 | 14.07 | 7.45E-09 | 2.83E-08 | 1.96E-04 | 1.43E-06 | 2.49E-01 | 9.34E-01 | 6.17E-01 |
| 307.95632 | 56.42  | 18.64 | 17.36 | 16.75 | 17.05 | 3.70E-15 | 1.90E-07 | 9.11E-14 | 2.99E-10 | 4.35E-02 | 5.73E-01 | 5.77E-01 |
| 308.03957 | 59.67  | 19.73 | 20.61 | 20.96 | 20.75 | 5.63E-16 | 1.48E-08 | 7.80E-14 | 1.69E-10 | 7.53E-02 | 7.92E-01 | 4.79E-01 |
| 308.04716 | 42.38  | 22.77 | 23.43 | 23.84 | 23.75 | 1.44E-06 | 9.12E-03 | 3.27E-06 | 4.34E-05 | 2.36E-01 | 4.70E-01 | 9.81E-01 |
| 308.08533 | 213.69 | 16.76 | 26.51 | 18.13 | 24.78 | 1.34E-32 | 3.70E-14 | 2.84E-01 | 7.33E-14 | 6.83E-14 | 1.57E-01 | 2.25E-13 |
| 308.10818 | 260.48 | 16.33 | 18.43 | 17.81 | 17.32 | 9.82E-12 | 3.83E-12 | 8.85E-07 | 2.91E-03 | 1.22E-01 | 1.04E-03 | 3.37E-01 |
| 308.22196 | 207.31 | 16.18 | 9.69  | 12.51 | 12.05 | 1.81E-22 | 4.67E-14 | 2.22E-09 | 8.73E-11 | 1.22E-05 | 6.03E-04 | 8.67E-01 |
| 308.22486 | 27.1   | 16.24 | 18.60 | 17.26 | 16.97 | 2.61E-24 | 3.83E-14 | 1.84E-06 | 1.84E-03 | 8.06E-10 | 7.60E-13 | 4.94E-01 |
| 308.24525 | 22.23  | 15.14 | 14.60 | 17.05 | 16.26 | 1.10E-23 | 7.05E-02 | 7.55E-14 | 6.99E-06 | 6.05E-14 | 7.07E-11 | 3.64E-03 |
| 308.25829 | 215.18 | 16.67 | 8.46  | 9.14  | 10.08 | 3.48E-57 | 3.65E-14 | 3.65E-14 | 3.65E-14 | 3.74E-01 | 1.26E-03 | 1.23E-01 |
| 308.26613 | 23.79  | 16.84 | 11.21 | 13.47 | 14.40 | 3.35E-40 | 3.65E-14 | 7.07E-14 | 4.00E-11 | 7.77E-10 | 7.27E-14 | 3.97E-02 |

|           |        |       |       |       |       |          |          |          |          |          |          |          |
|-----------|--------|-------|-------|-------|-------|----------|----------|----------|----------|----------|----------|----------|
| 308.58205 | 238.51 | 20.37 | 23.58 | 24.39 | 23.11 | 9.93E-29 | 7.25E-14 | 3.67E-14 | 1.03E-13 | 6.25E-02 | 4.93E-01 | 8.42E-04 |
| 308.58677 | 220.37 | 15.70 | 19.94 | 20.07 | 18.70 | 7.33E-19 | 7.67E-14 | 7.32E-14 | 3.40E-08 | 9.93E-01 | 7.19E-02 | 3.46E-02 |
| 308.61512 | 27.24  | 15.23 | 17.13 | 14.50 | 18.35 | 1.17E-16 | 6.68E-05 | 3.15E-01 | 6.67E-11 | 3.66E-08 | 3.65E-02 | 8.03E-14 |
| 308.6466  | 86.47  | 15.71 | 16.26 | 16.19 | 15.41 | 9.28E-03 | 1.82E-01 | 2.91E-01 | 6.96E-01 | 9.93E-01 | 1.74E-02 | 3.39E-02 |
| 308.73704 | 46.96  | 17.62 | 17.55 | 17.62 | 17.40 | 1.71E-01 | 8.86E-01 | 1.00E+00 | 1.85E-01 | 8.90E-01 | 5.83E-01 | 1.99E-01 |
| 308.74665 | 22.06  | 13.56 | 13.53 | 16.12 | 16.10 | 5.42E-16 | 1.00E+00 | 2.52E-10 | 1.48E-09 | 5.99E-10 | 3.05E-09 | 1.00E+00 |
| 308.82627 | 47.64  | 15.91 | 16.88 | 16.77 | 16.76 | 1.28E-12 | 6.78E-11 | 3.84E-09 | 2.46E-08 | 8.78E-01 | 8.39E-01 | 9.99E-01 |
| 308.83645 | 31.2   | 11.53 | 15.16 | 17.59 | 16.85 | 1.92E-36 | 7.65E-14 | 3.65E-14 | 3.70E-14 | 1.78E-07 | 8.31E-04 | 3.22E-01 |
| 308.85242 | 45.58  | 15.94 | 15.71 | 16.44 | 16.25 | 3.32E-02 | 8.12E-01 | 1.97E-01 | 6.45E-01 | 2.95E-02 | 2.01E-01 | 8.87E-01 |
| 308.87062 | 45.35  | 16.96 | 18.21 | 18.91 | 18.10 | 6.79E-18 | 7.61E-09 | 7.65E-14 | 2.78E-07 | 3.54E-03 | 9.59E-01 | 7.74E-04 |
| 308.87832 | 54.01  | 15.70 | 15.71 | 15.77 | 16.14 | 2.24E-01 | 1.00E+00 | 9.91E-01 | 2.37E-01 | 9.95E-01 | 2.82E-01 | 4.00E-01 |
| 308.8978  | 43.65  | 17.38 | 19.10 | 20.02 | 18.36 | 5.48E-34 | 7.47E-14 | 3.65E-14 | 1.33E-06 | 7.47E-06 | 6.70E-04 | 7.66E-14 |
| 308.91481 | 36.57  | 16.03 | 16.26 | 16.76 | 17.02 | 9.41E-05 | 7.45E-01 | 7.26E-03 | 1.75E-04 | 1.38E-01 | 9.08E-03 | 6.90E-01 |
| 308.93485 | 301.15 | 14.56 | 14.00 | 14.51 | 12.36 | 4.75E-15 | 1.38E-01 | 9.98E-01 | 1.70E-13 | 2.21E-01 | 6.47E-08 | 1.01E-12 |
| 308.94437 | 223.7  | 15.75 | 16.33 | 15.19 | 16.12 | 4.32E-02 | 4.79E-01 | 5.23E-01 | 8.05E-01 | 3.52E-02 | 9.63E-01 | 1.36E-01 |
| 308.95331 | 64.57  | 16.94 | 12.42 | 12.24 | 13.51 | 2.82E-31 | 3.85E-14 | 3.67E-14 | 7.52E-14 | 9.68E-01 | 3.05E-02 | 7.35E-03 |
| 309.00572 | 86.97  | 16.32 | 16.22 | 17.26 | 16.92 | 1.16E-06 | 9.65E-01 | 4.24E-05 | 2.42E-02 | 1.06E-05 | 8.14E-03 | 4.11E-01 |
| 309.01365 | 187.73 | 10.80 | 14.42 | 15.44 | 13.36 | 2.23E-26 | 7.29E-14 | 3.74E-14 | 2.76E-09 | 4.67E-02 | 4.40E-02 | 2.57E-06 |
| 309.01438 | 36.46  | 13.53 | 14.49 | 17.05 | 16.12 | 4.34E-28 | 5.11E-03 | 3.72E-14 | 7.62E-14 | 7.80E-14 | 1.08E-06 | 1.25E-02 |
| 309.03474 | 86.01  | 15.69 | 18.86 | 18.89 | 17.66 | 2.79E-49 | 3.65E-14 | 3.65E-14 | 7.07E-14 | 9.99E-01 | 1.46E-08 | 4.95E-09 |
| 309.04207 | 42.33  | 22.21 | 22.78 | 23.21 | 23.11 | 3.14E-07 | 1.20E-02 | 6.43E-07 | 2.00E-05 | 1.02E-01 | 3.25E-01 | 9.53E-01 |
| 309.04781 | 43.49  | 19.35 | 19.62 | 20.08 | 19.98 | 2.18E-09 | 9.93E-02 | 9.82E-09 | 2.59E-06 | 9.38E-04 | 2.32E-02 | 8.32E-01 |
| 309.08184 | 240.35 | 16.36 | 20.93 | 21.67 | 20.10 | 8.98E-40 | 3.65E-14 | 3.65E-14 | 6.61E-14 | 1.48E-01 | 9.91E-02 | 9.78E-05 |
| 309.08863 | 192.92 | 14.78 | 16.10 | 16.85 | 17.06 | 2.93E-08 | 4.49E-03 | 1.15E-06 | 1.87E-07 | 2.38E-01 | 8.88E-02 | 9.50E-01 |
| 309.09422 | 193.54 | 20.36 | 21.49 | 21.60 | 21.58 | 1.04E-06 | 1.05E-04 | 1.25E-05 | 3.55E-05 | 9.73E-01 | 9.85E-01 | 1.00E+00 |
| 309.11219 | 106.86 | 15.22 | 15.60 | 15.69 | 14.81 | 1.68E-03 | 3.55E-01 | 1.76E-01 | 3.23E-01 | 9.83E-01 | 8.30E-03 | 2.25E-03 |
| 309.12924 | 106.9  | 19.95 | 20.85 | 20.92 | 20.48 | 3.36E-24 | 7.41E-14 | 6.14E-14 | 1.45E-07 | 8.78E-01 | 8.03E-04 | 3.56E-05 |
| 309.15076 | 27.46  | 17.83 | 12.65 | 12.96 | 13.75 | 1.22E-59 | 3.65E-14 | 3.65E-14 | 3.65E-14 | 6.22E-01 | 2.72E-04 | 1.54E-02 |
| 309.1655  | 114.58 | 17.97 | 21.38 | 21.17 | 21.30 | 8.12E-26 | 7.03E-14 | 7.47E-14 | 7.29E-14 | 9.15E-01 | 9.95E-01 | 9.80E-01 |
| 309.18262 | 45.14  | 18.68 | 17.40 | 16.93 | 17.15 | 2.01E-37 | 6.36E-14 | 3.65E-14 | 3.67E-14 | 7.57E-04 | 1.79E-01 | 3.02E-01 |
| 309.20575 | 21.79  | 16.70 | 13.60 | 13.90 | 14.80 | 3.55E-40 | 3.65E-14 | 3.65E-14 | 7.38E-14 | 4.50E-01 | 2.27E-07 | 1.48E-04 |
| 309.20599 | 169.84 | 17.61 | 15.41 | 15.39 | 15.74 | 7.67E-35 | 3.65E-14 | 3.65E-14 | 6.45E-14 | 9.99E-01 | 2.51E-01 | 1.97E-01 |
| 309.22696 | 185.39 | 16.36 | 13.57 | 14.47 | 14.66 | 5.88E-22 | 5.41E-14 | 3.68E-12 | 1.39E-09 | 3.00E-03 | 3.17E-04 | 8.88E-01 |
| 309.27843 | 23.93  | 15.40 | 13.88 | 14.21 | 15.01 | 7.97E-03 | 1.01E-02 | 6.54E-02 | 8.63E-01 | 9.08E-01 | 1.23E-01 | 3.93E-01 |
| 309.40717 | 296.31 | 13.66 | 15.20 | 15.27 | 13.37 | 2.02E-10 | 1.76E-05 | 4.62E-06 | 8.09E-01 | 9.95E-01 | 1.05E-06 | 2.63E-07 |
| 309.90324 | 42.89  | 14.60 | 12.34 | 14.67 | 13.58 | 2.64E-18 | 7.38E-14 | 9.94E-01 | 7.27E-04 | 7.58E-14 | 4.07E-05 | 3.90E-04 |
| 309.91541 | 39.6   | 15.15 | 14.79 | 15.51 | 15.07 | 1.38E-01 | 6.25E-01 | 6.04E-01 | 9.94E-01 | 8.56E-02 | 8.08E-01 | 4.93E-01 |
| 309.93132 | 41.23  | 16.17 | 16.31 | 16.36 | 16.55 | 2.23E-01 | 8.38E-01 | 7.04E-01 | 1.51E-01 | 9.96E-01 | 5.87E-01 | 7.19E-01 |
| 309.93996 | 73.48  | 12.35 | 15.23 | 12.49 | 15.67 | 6.36E-12 | 6.36E-07 | 9.93E-01 | 1.80E-08 | 4.14E-06 | 8.53E-01 | 1.41E-07 |
| 309.97449 | 20.05  | 14.35 | 14.53 | 14.04 | 14.56 | 2.51E-02 | 7.43E-01 | 3.19E-01 | 6.67E-01 | 4.30E-02 | 9.99E-01 | 3.44E-02 |
| 309.99949 | 257.42 | 18.15 | 17.99 | 18.41 | 17.90 | 2.31E-01 | 9.10E-01 | 7.36E-01 | 7.56E-01 | 3.58E-01 | 9.88E-01 | 2.18E-01 |
| 309.99985 | 147.06 | 17.76 | 18.46 | 15.96 | 17.77 | 7.77E-06 | 4.62E-01 | 1.06E-03 | 1.00E+00 | 4.27E-06 | 5.27E-01 | 2.14E-03 |
| 310.03829 | 69.06  | 18.37 | 19.09 | 19.80 | 19.31 | 2.23E-11 | 9.65E-04 | 3.54E-12 | 1.37E-05 | 1.71E-03 | 6.97E-01 | 6.52E-02 |
| 310.04537 | 43.69  | 19.17 | 19.30 | 19.85 | 19.81 | 7.19E-08 | 7.52E-01 | 2.70E-06 | 2.88E-05 | 3.99E-04 | 2.20E-03 | 9.88E-01 |
| 310.05109 | 42.97  | 16.40 | 14.84 | 15.51 | 15.88 | 5.83E-14 | 8.59E-14 | 1.03E-05 | 3.20E-02 | 2.11E-03 | 9.22E-07 | 2.13E-01 |
| 310.05801 | 142.99 | 11.45 | 13.40 | 14.48 | 12.57 | 5.45E-06 | 5.00E-03 | 1.91E-06 | 2.38E-01 | 2.69E-01 | 5.32E-01 | 1.05E-02 |
| 310.08663 | 189.65 | 19.01 | 20.32 | 20.44 | 20.09 | 2.48E-06 | 5.64E-05 | 7.68E-06 | 1.94E-03 | 9.80E-01 | 8.75E-01 | 6.64E-01 |
| 310.09519 | 196.36 | 16.54 | 17.99 | 18.22 | 18.11 | 5.11E-11 | 2.78E-07 | 1.49E-09 | 5.40E-08 | 8.10E-01 | 9.70E-01 | 9.76E-01 |
| 310.11318 | 81.56  | 18.90 | 18.83 | 18.97 | 18.97 | 7.89E-01 | 9.76E-01 | 9.63E-01 | 9.60E-01 | 8.19E-01 | 8.19E-01 | 1.00E+00 |
| 310.13267 | 103.98 | 16.59 | 17.13 | 16.67 | 16.69 | 2.95E-04 | 2.86E-04 | 9.28E-01 | 8.90E-01 | 3.71E-03 | 8.11E-03 | 9.99E-01 |
| 310.16885 | 105.54 | 15.80 | 17.71 | 17.24 | 18.14 | 1.21E-22 | 7.41E-14 | 3.94E-10 | 6.56E-14 | 1.33E-01 | 2.15E-01 | 3.67E-04 |
| 310.17598 | 48.35  | 19.93 | 19.58 | 19.67 | 19.78 | 2.70E-02 | 2.06E-02 | 1.13E-01 | 5.81E-01 | 9.10E-01 | 4.31E-01 | 8.17E-01 |
| 310.20093 | 24.61  | 18.25 | 18.24 | 19.97 | 17.24 | 1.63E-22 | 1.00E+00 | 4.83E-12 | 1.34E-04 | 1.57E-11 | 2.84E-04 | 4.74E-14 |
| 310.27391 | 21.77  | 16.09 | 12.12 | 11.70 | 12.90 | 4.18E-35 | 3.67E-14 | 3.65E-14 | 7.45E-14 | 5.53E-01 | 9.06E-02 | 1.83E-03 |
| 310.27404 | 190.47 | 16.84 | 13.84 | 14.41 | 15.02 | 6.92E-31 | 3.65E-14 | 6.03E-14 | 7.31E-13 | 6.34E-02 | 7.13E-06 | 4.83E-02 |
| 310.31032 | 173.63 | 17.00 | 15.30 | 15.24 | 15.73 | 1.44E-23 | 7.32E-14 | 6.85E-14 | 2.63E-11 | 9.86E-01 | 7.73E-02 | 3.06E-02 |
| 310.46259 | 140.71 | 13.67 | 14.91 | 14.48 | 13.27 | 9.55E-03 | 7.01E-02 | 3.63E-01 | 8.71E-01 | 8.45E-01 | 1.32E-02 | 1.04E-01 |
| 310.55015 | 161.69 | 15.87 | 15.49 | 15.88 | 14.58 | 6.58E-04 | 6.63E-01 | 1.00E+00 | 1.12E-03 | 6.59E-01 | 4.96E-02 | 1.35E-03 |
| 310.62596 | 25.01  | 15.06 | 16.95 | 14.07 | 17.16 | 4.65E-11 | 3.50E-04 | 1.37E-01 | 8.36E-05 | 3.06E-08 | 9.71E-01 | 6.16E-09 |
| 310.66349 | 29.17  | 17.86 | 12.58 | 13.72 | 13.80 | 3.57E-37 | 3.65E-14 | 3.92E-14 | 5.01E-14 | 9.07E-03 | 6.57E-03 | 9.97E-01 |
| 310.82863 | 110.16 | 12.31 | 14.47 | 10.59 | 14.36 | 5.27E-27 | 3.45E-09 | 2.60E-06 | 5.34E-08 | 4.90E-14 | 9.88E-01 | 6.54E-04 |
| 310.84261 | 31.53  | 12.83 | 10.35 | 14.56 | 12.52 | 1.15E-10 | 5.72E-05 | 9.33E-03 | 9.42E-01 | 9.98E-12 | 1.39E-03 | 2.70E-03 |
| 310.86795 | 45.18  | 16.17 | 16.94 | 17.73 | 16.81 | 8.42E-12 | 7.38E-04 | 6.56E-13 | 9.52E-03 | 7.90E-04 | 9.28E-01 | 9.71E-05 |
| 310.87564 | 48.57  | 15.13 | 15.64 | 16.08 | 15.83 | 1.37E-04 | 8.04E-02 | 5.92E-05 | 8.81E-03 | 1.80E-01 | 8.42E-01 | 6.61E-01 |
| 310.89302 | 44.15  | 15.45 | 14.85 | 13.96 | 14.09 | 1.08E-07 | 1.27E-01 | 5.27E-07 | 1.27E-05 | 8.37E-03 | 4.34E-02 | 9.67E-01 |
| 310.91121 | 47.74  | 18.10 | 16.58 | 17.67 | 17.14 | 3.33E-14 | 1.05E-13 | 7.90E-02 | 3.10E-06 | 8.20E-08 | 1.88E-02 | 2.94E-02 |
| 310.97504 | 68.85  | 21.08 | 21.48 | 21.97 | 21.12 | 5.85E-12 | 7.04E-03 | 4.59E-11 | 9.89E-01 | 1.01E-03 | 3.05E-02 | 2.87E-09 |
| 311.00378 | 75.63  | 16.58 | 16.67 | 15.15 | 16.98 | 9.01E-06 | 9.95E-01 | 5.75E-04 | 7.03E-01 | 3.71E-04 | 8.49E-01 | 1.79E-05 |

|           |        |       |       |       |       |          |          |          |          |          |          |          |
|-----------|--------|-------|-------|-------|-------|----------|----------|----------|----------|----------|----------|----------|
| 311.02414 | 65.46  | 18.95 | 18.92 | 20.16 | 19.27 | 1.28E-20 | 9.91E-01 | 7.47E-14 | 7.67E-02 | 7.56E-14 | 4.63E-02 | 8.55E-10 |
| 311.04492 | 58.34  | 16.14 | 14.12 | 14.91 | 15.48 | 6.59E-07 | 2.33E-07 | 3.04E-03 | 2.70E-01 | 1.36E-01 | 2.04E-03 | 4.16E-01 |
| 311.08369 | 66.82  | 16.95 | 16.02 | 15.96 | 15.49 | 1.79E-08 | 3.02E-04 | 8.06E-05 | 8.77E-09 | 9.93E-01 | 1.20E-01 | 2.00E-01 |
| 311.09013 | 197.85 | 14.48 | 15.73 | 15.91 | 16.43 | 4.34E-07 | 1.59E-03 | 1.58E-04 | 3.26E-07 | 9.49E-01 | 2.03E-01 | 4.65E-01 |
| 311.09868 | 64.99  | 16.67 | 17.84 | 17.38 | 16.79 | 7.51E-03 | 9.10E-03 | 2.14E-01 | 9.89E-01 | 6.11E-01 | 3.72E-02 | 4.23E-01 |
| 311.12377 | 55.28  | 17.86 | 17.37 | 17.89 | 17.99 | 9.11E-05 | 2.31E-03 | 9.95E-01 | 7.85E-01 | 1.38E-03 | 1.53E-04 | 9.00E-01 |
| 311.17986 | 43.91  | 17.56 | 17.51 | 17.55 | 17.54 | 9.94E-01 | 9.92E-01 | 1.00E+00 | 9.99E-01 | 9.98E-01 | 9.99E-01 | 1.00E+00 |
| 311.18914 | 25.06  | 12.84 | 15.97 | 11.24 | 15.76 | 8.89E-25 | 9.39E-11 | 1.64E-03 | 3.82E-09 | 7.03E-14 | 9.70E-01 | 7.44E-14 |
| 311.20424 | 23.76  | 15.46 | 14.66 | 16.75 | 15.31 | 7.19E-08 | 7.83E-02 | 6.00E-04 | 9.72E-01 | 1.89E-08 | 2.53E-01 | 2.69E-04 |
| 311.22122 | 284.72 | 19.39 | 17.81 | 17.62 | 17.83 | 5.82E-11 | 8.68E-08 | 1.34E-09 | 2.58E-07 | 9.02E-01 | 1.00E+00 | 8.86E-01 |
| 311.22146 | 20.12  | 17.99 | 14.26 | 14.55 | 15.51 | 2.17E-72 | 3.65E-14 | 3.65E-14 | 3.65E-14 | 2.08E-01 | 3.45E-13 | 1.40E-08 |
| 311.23657 | 23.8   | 18.52 | 15.42 | 17.02 | 17.59 | 4.03E-38 | 3.65E-14 | 4.52E-13 | 1.57E-05 | 1.43E-13 | 6.41E-14 | 2.45E-02 |
| 311.25778 | 23.89  | 18.78 | 15.63 | 15.42 | 16.42 | 7.50E-35 | 3.65E-14 | 3.65E-14 | 7.49E-14 | 8.36E-01 | 1.32E-02 | 7.23E-04 |
| 311.25807 | 170.24 | 17.46 | 14.69 | 14.85 | 15.34 | 6.75E-40 | 3.65E-14 | 3.65E-14 | 5.30E-14 | 8.35E-01 | 5.47E-03 | 5.60E-02 |
| 311.29414 | 23.63  | 14.78 | 13.38 | 13.92 | 14.59 | 8.54E-02 | 8.43E-02 | 4.56E-01 | 9.89E-01 | 8.06E-01 | 2.15E-01 | 7.02E-01 |
| 311.29447 | 200.9  | 15.76 | 12.91 | 13.13 | 14.05 | 8.70E-09 | 5.35E-08 | 4.34E-07 | 3.12E-03 | 9.70E-01 | 1.13E-01 | 2.60E-01 |
| 311.60163 | 83.08  | 15.70 | 18.64 | 18.43 | 18.43 | 4.85E-37 | 3.65E-14 | 3.65E-14 | 3.70E-14 | 7.82E-01 | 7.90E-01 | 1.00E+00 |
| 311.63287 | 27.87  | 18.33 | 11.92 | 12.65 | 13.99 | 2.57E-65 | 3.65E-14 | 3.65E-14 | 3.65E-14 | 4.67E-02 | 6.79E-11 | 2.99E-05 |
| 311.67942 | 29.79  | 15.95 | 18.48 | 18.47 | 17.74 | 8.07E-27 | 5.32E-14 | 5.21E-14 | 2.21E-12 | 1.00E+00 | 1.21E-02 | 1.37E-02 |
| 311.90571 | 51.01  | 19.20 | 20.81 | 21.08 | 20.32 | 8.66E-17 | 4.21E-12 | 7.43E-14 | 3.09E-06 | 5.87E-01 | 1.28E-01 | 3.78E-03 |
| 311.97973 | 54.54  | 17.10 | 16.08 | 16.32 | 15.67 | 2.05E-07 | 1.55E-04 | 5.86E-03 | 1.01E-07 | 7.59E-01 | 3.67E-01 | 4.88E-02 |
| 312.01543 | 73.55  | 17.59 | 17.54 | 17.72 | 17.46 | 6.22E-01 | 9.95E-01 | 8.98E-01 | 9.12E-01 | 7.99E-01 | 9.77E-01 | 5.62E-01 |
| 312.02878 | 46.59  | 20.62 | 16.76 | 16.60 | 17.00 | 1.91E-31 | 4.16E-14 | 3.72E-14 | 6.52E-14 | 9.69E-01 | 8.98E-01 | 6.63E-01 |
| 312.09038 | 65.36  | 16.17 | 15.68 | 15.45 | 15.34 | 9.08E-03 | 2.36E-01 | 2.84E-02 | 1.04E-02 | 8.24E-01 | 5.92E-01 | 9.74E-01 |
| 312.10289 | 82.88  | 15.53 | 16.44 | 16.28 | 16.51 | 1.96E-05 | 2.05E-04 | 3.23E-03 | 8.16E-05 | 8.78E-01 | 9.89E-01 | 7.20E-01 |
| 312.11629 | 61.7   | 17.31 | 18.02 | 17.97 | 18.37 | 1.98E-05 | 4.37E-03 | 8.43E-03 | 8.81E-06 | 9.96E-01 | 3.91E-01 | 2.69E-01 |
| 312.13508 | 38.25  | 17.25 | 13.26 | 13.38 | 14.29 | 1.52E-46 | 3.65E-14 | 3.65E-14 | 3.83E-14 | 9.57E-01 | 3.35E-04 | 1.90E-03 |
| 312.18026 | 40.26  | 15.10 | 16.58 | 16.88 | 16.03 | 1.15E-04 | 2.01E-03 | 1.07E-04 | 1.20E-01 | 8.98E-01 | 5.84E-01 | 2.07E-01 |
| 312.21667 | 23.58  | 16.54 | 16.06 | 17.51 | 16.66 | 5.44E-05 | 3.57E-01 | 5.83E-03 | 9.77E-01 | 1.64E-05 | 2.12E-01 | 3.43E-02 |
| 312.22505 | 210.42 | 16.50 | 13.76 | 13.04 | 14.63 | 5.79E-15 | 7.34E-10 | 8.16E-14 | 6.08E-05 | 3.08E-01 | 1.88E-01 | 1.46E-03 |
| 312.23983 | 23.43  | 16.19 | 11.33 | 13.37 | 14.28 | 6.33E-45 | 3.65E-14 | 6.01E-14 | 7.16E-11 | 3.85E-12 | 6.67E-14 | 5.73E-03 |
| 312.25324 | 176.58 | 17.92 | 15.87 | 15.93 | 16.29 | 2.05E-22 | 7.61E-14 | 7.41E-14 | 2.23E-12 | 9.93E-01 | 2.16E-01 | 3.34E-01 |
| 312.3258  | 281.64 | 17.55 | 16.10 | 15.88 | 16.22 | 1.87E-11 | 3.72E-08 | 1.61E-10 | 1.05E-06 | 8.12E-01 | 9.63E-01 | 5.32E-01 |
| 312.32592 | 20.92  | 16.34 | 14.28 | 13.48 | 14.44 | 2.05E-29 | 7.65E-14 | 3.65E-14 | 8.55E-14 | 1.99E-03 | 9.06E-01 | 2.06E-04 |
| 312.32611 | 178.31 | 17.57 | 15.51 | 15.29 | 16.07 | 7.18E-34 | 3.72E-14 | 3.65E-14 | 7.74E-14 | 6.01E-01 | 8.48E-03 | 8.35E-05 |
| 312.64075 | 28.63  | 17.34 | 12.48 | 12.93 | 13.27 | 1.82E-83 | 3.65E-14 | 3.65E-14 | 3.65E-14 | 4.41E-02 | 8.12E-05 | 2.26E-01 |
| 312.65317 | 25.79  | 15.23 | 18.63 | 13.07 | 13.29 | 8.20E-68 | 3.65E-14 | 7.29E-14 | 1.08E-13 | 3.65E-14 | 3.65E-14 | 7.78E-01 |
| 312.6628  | 30.82  | 15.22 | 14.57 | 17.10 | 16.84 | 2.95E-12 | 2.74E-01 | 1.93E-06 | 1.03E-04 | 4.12E-10 | 5.91E-08 | 9.04E-01 |
| 312.77417 | 51.39  | 17.06 | 18.04 | 18.11 | 17.67 | 1.93E-09 | 1.57E-07 | 1.31E-08 | 3.08E-03 | 9.78E-01 | 1.72E-01 | 6.88E-02 |
| 312.78219 | 51.88  | 16.77 | 16.24 | 16.09 | 16.57 | 4.76E-02 | 1.87E-01 | 4.78E-02 | 8.86E-01 | 9.44E-01 | 6.32E-01 | 3.02E-01 |
| 312.86606 | 45.34  | 13.79 | 13.21 | 14.04 | 13.03 | 2.01E-02 | 3.49E-01 | 8.94E-01 | 1.48E-01 | 1.01E-01 | 9.60E-01 | 3.29E-02 |
| 312.90928 | 47.48  | 16.70 | 16.75 | 17.89 | 17.39 | 2.64E-14 | 9.87E-01 | 1.70E-12 | 1.10E-04 | 5.60E-11 | 6.69E-04 | 1.29E-02 |
| 312.96338 | 72.88  | 16.36 | 17.01 | 16.35 | 16.32 | 1.18E-01 | 1.79E-01 | 1.00E+00 | 1.00E+00 | 1.86E-01 | 1.81E-01 | 1.00E+00 |
| 312.97094 | 44.21  | 17.57 | 17.67 | 18.19 | 17.14 | 9.61E-09 | 9.00E-01 | 2.14E-04 | 3.42E-02 | 4.46E-03 | 6.12E-03 | 1.41E-09 |
| 312.97996 | 79.93  | 18.05 | 17.94 | 18.81 | 18.94 | 2.42E-11 | 8.93E-01 | 9.52E-06 | 5.19E-07 | 7.53E-07 | 3.93E-08 | 8.72E-01 |
| 312.98644 | 66.96  | 17.31 | 13.60 | 13.03 | 13.77 | 2.64E-28 | 7.27E-14 | 3.85E-14 | 7.43E-14 | 4.07E-01 | 9.65E-01 | 1.94E-01 |
| 313.01096 | 96.84  | 16.49 | 15.52 | 15.81 | 15.24 | 1.50E-02 | 6.77E-02 | 3.12E-01 | 1.19E-02 | 8.81E-01 | 9.10E-01 | 5.05E-01 |
| 313.02285 | 265.22 | 17.38 | 19.46 | 18.36 | 17.79 | 2.70E-19 | 7.35E-14 | 1.49E-05 | 2.12E-01 | 2.06E-06 | 2.47E-12 | 4.18E-02 |
| 313.02907 | 275.18 | 18.49 | 21.48 | 21.93 | 21.16 | 3.79E-46 | 3.65E-14 | 3.65E-14 | 3.65E-14 | 1.28E-01 | 4.21E-01 | 1.63E-03 |
| 313.05183 | 48.61  | 19.32 | 18.77 | 19.83 | 19.68 | 2.54E-07 | 1.56E-02 | 2.86E-02 | 2.24E-01 | 3.12E-07 | 2.74E-05 | 8.71E-01 |
| 313.11192 | 112.68 | 14.05 | 14.63 | 13.85 | 15.14 | 1.26E-09 | 1.74E-02 | 7.05E-01 | 6.47E-07 | 6.33E-04 | 5.93E-02 | 5.99E-09 |
| 313.14328 | 148.7  | 19.73 | 19.31 | 19.53 | 19.49 | 4.98E-01 | 4.09E-01 | 8.89E-01 | 8.27E-01 | 8.46E-01 | 9.20E-01 | 9.99E-01 |
| 313.15501 | 24.94  | 14.99 | 19.53 | 13.83 | 16.90 | 2.08E-31 | 5.67E-14 | 2.42E-02 | 4.77E-05 | 3.65E-14 | 3.55E-08 | 7.05E-11 |
| 313.1857  | 33.33  | 16.60 | 10.15 | 11.55 | 10.77 | 2.14E-19 | 7.45E-14 | 1.10E-11 | 1.31E-13 | 1.91E-01 | 8.25E-01 | 7.00E-01 |
| 313.20475 | 27.07  | 14.88 | 17.47 | 13.91 | 17.12 | 2.79E-28 | 8.76E-14 | 7.36E-03 | 5.44E-11 | 4.65E-14 | 6.94E-01 | 7.38E-14 |
| 313.21616 | 217.6  | 16.62 | 13.09 | 13.22 | 12.70 | 1.03E-12 | 2.80E-09 | 8.24E-09 | 1.36E-10 | 9.95E-01 | 9.07E-01 | 7.93E-01 |
| 313.21968 | 23.43  | 12.63 | 11.58 | 13.53 | 12.70 | 2.81E-07 | 5.41E-03 | 2.16E-02 | 9.97E-01 | 3.49E-08 | 5.07E-03 | 5.91E-02 |
| 313.23708 | 287.85 | 18.84 | 17.07 | 17.28 | 16.80 | 2.73E-17 | 1.41E-12 | 2.61E-10 | 7.86E-14 | 7.95E-01 | 6.71E-01 | 1.77E-01 |
| 313.23712 | 21.3   | 17.41 | 13.57 | 14.07 | 15.08 | 2.27E-75 | 3.65E-14 | 3.65E-14 | 3.65E-14 | 3.80E-03 | 7.45E-14 | 7.40E-10 |
| 313.25227 | 23.51  | 16.98 | 13.93 | 14.03 | 14.91 | 2.10E-24 | 6.63E-14 | 7.09E-14 | 1.14E-10 | 9.85E-01 | 7.40E-03 | 1.95E-02 |
| 313.2734  | 24.26  | 20.41 | 18.28 | 18.37 | 18.83 | 9.29E-30 | 3.76E-14 | 4.19E-14 | 7.69E-14 | 9.60E-01 | 1.77E-02 | 6.20E-02 |
| 313.27349 | 185.68 | 21.27 | 18.90 | 18.34 | 19.21 | 1.22E-12 | 1.90E-08 | 2.81E-12 | 2.29E-06 | 4.89E-01 | 8.74E-01 | 1.42E-01 |
| 313.524   | 257.1  | 15.50 | 15.24 | 15.16 | 15.00 | 2.33E-01 | 6.91E-01 | 4.83E-01 | 1.81E-01 | 9.90E-01 | 7.89E-01 | 9.21E-01 |
| 313.53192 | 296.28 | 12.67 | 16.75 | 15.66 | 15.17 | 9.81E-16 | 7.47E-14 | 1.35E-09 | 1.17E-06 | 8.97E-02 | 6.40E-03 | 7.37E-01 |
| 313.67054 | 34.49  | 15.68 | 16.48 | 17.49 | 15.34 | 3.21E-04 | 4.02E-01 | 2.30E-03 | 9.15E-01 | 2.13E-01 | 1.54E-01 | 4.59E-04 |
| 313.8814  | 255.18 | 17.83 | 15.69 | 15.01 | 16.08 | 7.25E-14 | 1.30E-08 | 1.29E-13 | 7.25E-06 | 2.07E-01 | 7.15E-01 | 1.69E-02 |
| 313.88152 | 109.09 | 18.75 | 15.84 | 17.23 | 16.12 | 4.17E-21 | 7.39E-14 | 1.30E-06 | 7.58E-14 | 2.62E-05 | 8.01E-01 | 1.68E-03 |
| 313.88984 | 44.38  | 14.84 | 16.50 | 15.27 | 16.59 | 2.93E-14 | 1.76E-10 | 2.50E-01 | 7.13E-11 | 5.62E-06 | 9.88E-01 | 2.15E-06 |

|           |        |       |       |       |       |          |          |          |          |          |          |          |
|-----------|--------|-------|-------|-------|-------|----------|----------|----------|----------|----------|----------|----------|
| 313.90273 | 50.77  | 17.87 | 19.33 | 19.66 | 18.84 | 2.05E-12 | 1.75E-08 | 3.51E-12 | 5.14E-04 | 5.21E-01 | 2.01E-01 | 5.66E-03 |
| 313.99699 | 50.9   | 17.58 | 16.03 | 16.17 | 16.43 | 1.34E-17 | 7.61E-14 | 2.15E-13 | 4.09E-09 | 8.60E-01 | 1.40E-01 | 4.98E-01 |
| 314.03054 | 54.9   | 17.14 | 9.97  | 11.46 | 12.33 | 1.61E-39 | 3.65E-14 | 3.67E-14 | 7.14E-14 | 6.81E-03 | 7.05E-06 | 2.53E-01 |
| 314.03287 | 276.91 | 10.72 | 16.10 | 17.33 | 15.70 | 3.34E-50 | 3.65E-14 | 3.65E-14 | 3.65E-14 | 4.19E-03 | 6.99E-01 | 8.85E-05 |
| 314.05505 | 47.81  | 16.49 | 14.91 | 15.17 | 15.57 | 3.73E-05 | 4.07E-05 | 7.22E-04 | 4.50E-02 | 8.88E-01 | 2.75E-01 | 6.82E-01 |
| 314.07499 | 91.74  | 16.63 | 18.38 | 18.32 | 18.64 | 2.57E-16 | 1.63E-11 | 4.73E-11 | 1.32E-13 | 9.95E-01 | 7.10E-01 | 5.57E-01 |
| 314.08466 | 55.84  | 17.75 | 18.10 | 18.07 | 17.70 | 3.24E-04 | 1.02E-02 | 2.05E-02 | 9.72E-01 | 9.94E-01 | 4.55E-03 | 9.30E-03 |
| 314.09081 | 214.16 | 14.15 | 17.79 | 19.24 | 17.45 | 2.41E-30 | 7.35E-14 | 3.65E-14 | 8.57E-14 | 1.20E-03 | 8.29E-01 | 5.57E-05 |
| 314.10353 | 280.68 | 16.49 | 20.29 | 20.22 | 19.35 | 6.16E-42 | 3.65E-14 | 3.65E-14 | 5.18E-14 | 9.92E-01 | 2.07E-03 | 4.92E-03 |
| 314.11128 | 123.16 | 15.09 | 15.22 | 13.22 | 15.29 | 1.40E-31 | 8.60E-01 | 4.34E-14 | 6.51E-01 | 3.87E-14 | 9.81E-01 | 3.85E-14 |
| 314.14661 | 288.99 | 17.54 | 16.74 | 16.81 | 16.55 | 6.37E-06 | 4.04E-04 | 1.31E-03 | 1.13E-05 | 9.87E-01 | 7.96E-01 | 5.94E-01 |
| 314.17188 | 59.44  | 14.22 | 14.52 | 15.64 | 15.21 | 1.46E-01 | 9.69E-01 | 1.41E-01 | 4.69E-01 | 3.59E-01 | 7.60E-01 | 9.29E-01 |
| 314.21824 | 22.69  | 15.60 | 15.90 | 13.69 | 15.59 | 9.49E-11 | 7.95E-01 | 5.24E-08 | 1.00E+00 | 1.13E-09 | 8.09E-01 | 3.43E-07 |
| 314.23228 | 24.11  | 18.95 | 19.06 | 19.28 | 19.16 | 2.87E-01 | 9.11E-01 | 2.32E-01 | 6.25E-01 | 6.36E-01 | 9.49E-01 | 9.28E-01 |
| 314.24066 | 207.9  | 15.98 | 11.21 | 12.71 | 11.81 | 5.25E-11 | 2.35E-10 | 1.55E-05 | 7.09E-08 | 1.48E-01 | 8.42E-01 | 6.02E-01 |
| 314.26902 | 167.41 | 17.18 | 14.87 | 14.88 | 15.99 | 8.33E-32 | 3.72E-14 | 3.70E-14 | 9.12E-09 | 1.00E+00 | 2.52E-07 | 2.19E-07 |
| 314.27656 | 292.36 | 18.92 | 17.38 | 17.62 | 17.09 | 2.34E-07 | 2.32E-05 | 4.30E-04 | 6.48E-07 | 8.90E-01 | 8.29E-01 | 4.04E-01 |
| 314.27668 | 23.28  | 18.19 | 15.00 | 15.45 | 15.89 | 1.85E-47 | 3.65E-14 | 3.65E-14 | 3.70E-14 | 6.11E-02 | 2.36E-05 | 9.61E-02 |
| 314.52647 | 64.86  | 15.07 | 15.86 | 16.23 | 15.92 | 1.51E-05 | 5.15E-03 | 7.76E-06 | 3.03E-03 | 4.17E-01 | 9.95E-01 | 5.88E-01 |
| 314.53597 | 86.57  | 14.89 | 16.03 | 15.75 | 15.55 | 2.59E-05 | 1.45E-05 | 1.67E-03 | 3.33E-02 | 6.48E-01 | 2.25E-01 | 8.58E-01 |
| 314.59292 | 212.69 | 13.23 | 14.01 | 14.39 | 14.51 | 1.63E-02 | 2.70E-01 | 3.57E-02 | 2.19E-02 | 8.27E-01 | 6.98E-01 | 9.94E-01 |
| 314.60525 | 280.65 | 15.15 | 17.55 | 17.44 | 16.75 | 1.05E-23 | 6.85E-14 | 7.29E-14 | 3.57E-10 | 9.67E-01 | 6.06E-03 | 2.23E-02 |
| 314.77142 | 46.76  | 17.51 | 18.24 | 18.32 | 17.90 | 6.41E-21 | 7.46E-14 | 7.54E-14 | 3.68E-05 | 7.89E-01 | 5.59E-04 | 1.04E-05 |
| 314.77918 | 51.2   | 17.13 | 16.85 | 16.62 | 17.05 | 2.18E-01 | 6.95E-01 | 1.97E-01 | 9.91E-01 | 8.29E-01 | 8.77E-01 | 3.87E-01 |
| 314.81579 | 44.51  | 17.38 | 17.60 | 18.16 | 17.25 | 1.99E-05 | 6.37E-01 | 1.98E-04 | 9.05E-01 | 1.91E-02 | 2.88E-01 | 3.28E-05 |
| 314.86421 | 19.51  | 16.03 | 9.78  | 11.14 | 11.01 | 2.05E-44 | 3.65E-14 | 3.65E-14 | 3.65E-14 | 1.94E-03 | 8.43E-03 | 9.89E-01 |
| 314.94253 | 42.21  | 14.02 | 12.33 | 16.22 | 14.22 | 1.43E-18 | 3.75E-05 | 3.62E-08 | 9.51E-01 | 7.23E-14 | 1.18E-05 | 2.83E-06 |
| 314.97608 | 305.03 | 14.75 | 16.25 | 15.72 | 14.40 | 3.00E-20 | 2.00E-13 | 1.36E-06 | 2.61E-01 | 2.58E-02 | 7.67E-14 | 4.85E-10 |
| 315.01734 | 40.7   | 16.69 | 15.20 | 15.33 | 14.79 | 2.72E-09 | 3.69E-06 | 2.66E-05 | 6.38E-09 | 9.67E-01 | 5.46E-01 | 2.80E-01 |
| 315.06109 | 71.61  | 17.32 | 18.49 | 18.40 | 18.35 | 1.17E-07 | 1.28E-06 | 8.20E-06 | 4.34E-05 | 9.74E-01 | 9.30E-01 | 9.97E-01 |
| 315.07995 | 282.66 | 14.74 | 17.93 | 17.94 | 16.77 | 1.87E-33 | 3.65E-14 | 3.65E-14 | 3.94E-13 | 1.00E+00 | 7.02E-05 | 5.25E-05 |
| 315.13048 | 47.17  | 17.23 | 17.90 | 17.65 | 18.01 | 2.83E-02 | 7.26E-02 | 4.08E-01 | 2.96E-02 | 8.15E-01 | 9.79E-01 | 5.92E-01 |
| 315.14967 | 64.06  | 17.26 | 15.82 | 16.39 | 15.71 | 1.97E-05 | 1.55E-04 | 4.69E-02 | 6.68E-05 | 3.46E-01 | 9.90E-01 | 2.20E-01 |
| 315.154   | 269.61 | 17.73 | 13.47 | 10.87 | 15.51 | 1.76E-36 | 7.54E-14 | 3.65E-14 | 1.23E-05 | 1.94E-07 | 1.22E-04 | 7.36E-14 |
| 315.1966  | 29.41  | 16.68 | 12.82 | 13.71 | 13.65 | 1.91E-15 | 8.63E-14 | 1.32E-09 | 2.37E-09 | 2.20E-01 | 3.06E-01 | 9.99E-01 |
| 315.22615 | 22.51  | 16.74 | 18.89 | 17.26 | 18.47 | 3.60E-19 | 7.54E-14 | 1.08E-01 | 2.61E-11 | 2.89E-10 | 3.18E-01 | 6.30E-06 |
| 315.23172 | 206.51 | 16.71 | 13.42 | 13.47 | 13.84 | 2.40E-16 | 3.38E-13 | 4.20E-13 | 4.44E-10 | 9.99E-01 | 7.56E-01 | 8.13E-01 |
| 315.23456 | 23.77  | 16.20 | 15.28 | 15.96 | 15.88 | 3.55E-02 | 2.03E-02 | 8.60E-01 | 7.60E-01 | 1.61E-01 | 2.75E-01 | 9.96E-01 |
| 315.6822  | 59.38  | 15.17 | 14.64 | 15.34 | 14.22 | 6.82E-02 | 6.25E-01 | 9.80E-01 | 1.57E-01 | 4.08E-01 | 8.06E-01 | 7.61E-02 |
| 315.72776 | 22.46  | 15.94 | 17.50 | 15.82 | 17.07 | 6.07E-08 | 7.35E-06 | 9.82E-01 | 2.84E-03 | 2.28E-06 | 5.70E-01 | 1.05E-03 |
| 315.90615 | 99.9   | 13.84 | 15.24 | 14.28 | 15.17 | 1.83E-04 | 7.65E-04 | 6.16E-01 | 2.20E-03 | 4.63E-02 | 9.98E-01 | 8.59E-02 |
| 315.9149  | 95.99  | 16.08 | 16.64 | 16.80 | 16.39 | 4.71E-03 | 4.02E-02 | 3.47E-03 | 4.61E-01 | 8.78E-01 | 6.87E-01 | 2.56E-01 |
| 315.93054 | 44.3   | 16.11 | 14.75 | 15.09 | 14.65 | 1.74E-09 | 1.23E-07 | 8.96E-05 | 2.54E-08 | 4.98E-01 | 9.72E-01 | 2.72E-01 |
| 315.94528 | 44.22  | 16.15 | 15.92 | 15.50 | 16.07 | 1.18E-03 | 5.32E-01 | 9.16E-04 | 9.71E-01 | 8.06E-02 | 8.33E-01 | 8.78E-03 |
| 315.95296 | 41.64  | 16.92 | 16.21 | 16.15 | 16.39 | 1.96E-05 | 2.25E-04 | 4.16E-05 | 1.41E-02 | 9.85E-01 | 7.37E-01 | 5.19E-01 |
| 316.03406 | 64.41  | 16.08 | 16.71 | 16.62 | 16.94 | 3.01E-04 | 9.10E-03 | 3.42E-02 | 1.91E-04 | 9.67E-01 | 6.85E-01 | 3.99E-01 |
| 316.05554 | 67.76  | 18.16 | 18.89 | 18.26 | 19.24 | 6.66E-04 | 5.73E-02 | 9.88E-01 | 1.69E-03 | 1.38E-01 | 6.48E-01 | 6.51E-03 |
| 316.06402 | 81.55  | 15.79 | 17.16 | 16.82 | 17.14 | 3.21E-12 | 1.78E-10 | 1.33E-06 | 8.90E-10 | 3.44E-01 | 1.00E+00 | 4.22E-01 |
| 316.21155 | 24.33  | 16.79 | 15.09 | 15.64 | 15.26 | 2.22E-12 | 1.93E-11 | 5.49E-06 | 3.90E-09 | 9.67E-02 | 8.95E-01 | 4.08E-01 |
| 316.23398 | 25.68  | 17.89 | 19.90 | 18.29 | 19.74 | 1.06E-23 | 7.32E-14 | 1.93E-01 | 7.63E-14 | 1.53E-12 | 8.65E-01 | 4.96E-10 |
| 316.24787 | 23.61  | 18.87 | 19.42 | 19.61 | 19.51 | 9.96E-04 | 3.07E-02 | 1.11E-03 | 9.79E-03 | 7.72E-01 | 9.71E-01 | 9.61E-01 |
| 316.28433 | 21.86  | 16.01 | 10.82 | 12.01 | 11.74 | 1.06E-25 | 4.41E-14 | 7.41E-14 | 7.32E-14 | 5.01E-02 | 2.17E-01 | 9.39E-01 |
| 316.6352  | 106.35 | 13.89 | 15.82 | 12.64 | 15.41 | 1.10E-13 | 1.52E-05 | 1.00E-02 | 1.55E-03 | 1.94E-12 | 7.64E-01 | 1.95E-09 |
| 316.6591  | 110.17 | 12.42 | 14.74 | 14.84 | 14.44 | 5.45E-10 | 6.99E-08 | 1.35E-08 | 5.94E-06 | 9.95E-01 | 8.89E-01 | 7.70E-01 |
| 316.66515 | 27.09  | 15.66 | 17.08 | 16.54 | 14.63 | 2.38E-10 | 2.07E-04 | 4.28E-02 | 1.68E-02 | 4.03E-01 | 3.74E-10 | 9.66E-07 |
| 316.73551 | 22.45  | 16.73 | 18.36 | 17.40 | 18.24 | 4.51E-15 | 4.08E-13 | 5.81E-03 | 4.16E-11 | 3.56E-05 | 9.43E-01 | 5.89E-04 |
| 316.76868 | 46.57  | 16.25 | 16.80 | 16.70 | 16.32 | 3.99E-07 | 5.82E-06 | 2.47E-04 | 8.96E-01 | 8.16E-01 | 3.70E-04 | 7.16E-03 |
| 316.77621 | 51.59  | 16.67 | 15.89 | 15.73 | 16.43 | 1.42E-03 | 1.94E-02 | 2.63E-03 | 8.27E-01 | 9.40E-01 | 2.15E-01 | 6.09E-02 |
| 316.78594 | 45.22  | 15.73 | 12.51 | 15.55 | 13.04 | 4.51E-19 | 9.63E-14 | 9.61E-01 | 2.93E-10 | 1.44E-12 | 5.59E-01 | 9.49E-09 |
| 316.79619 | 19.95  | 16.59 | 11.34 | 11.91 | 12.28 | 1.69E-80 | 3.65E-14 | 3.65E-14 | 3.65E-14 | 1.64E-02 | 2.10E-05 | 2.38E-01 |
| 316.81305 | 44.57  | 17.08 | 17.33 | 17.88 | 16.76 | 5.00E-05 | 7.07E-01 | 2.62E-03 | 4.97E-01 | 8.24E-02 | 8.50E-02 | 2.43E-05 |
| 316.83657 | 119.21 | 12.35 | 13.78 | 10.32 | 14.03 | 3.01E-13 | 1.44E-02 | 1.41E-04 | 3.58E-03 | 8.37E-11 | 9.60E-01 | 1.22E-11 |
| 316.85845 | 42.26  | 15.25 | 15.66 | 15.86 | 15.91 | 1.06E-02 | 2.23E-01 | 2.28E-02 | 1.63E-02 | 8.01E-01 | 6.98E-01 | 9.97E-01 |
| 316.88202 | 27.36  | 14.51 | 14.28 | 15.38 | 15.77 | 1.11E-02 | 9.63E-01 | 2.73E-01 | 5.97E-02 | 1.21E-01 | 2.13E-02 | 8.73E-01 |
| 316.90714 | 90.38  | 15.98 | 21.57 | 21.70 | 20.18 | 6.73E-31 | 3.85E-14 | 3.70E-14 | 7.46E-14 | 9.93E-01 | 2.47E-02 | 1.03E-02 |
| 316.93842 | 49.33  | 14.98 | 15.68 | 17.42 | 16.55 | 4.59E-23 | 9.00E-03 | 5.10E-14 | 1.91E-10 | 1.42E-12 | 1.19E-03 | 9.97E-04 |
| 316.93974 | 306.28 | 11.73 | 18.21 | 16.50 | 14.37 | 1.89E-62 | 3.65E-14 | 3.65E-14 | 7.38E-14 | 2.75E-08 | 3.65E-14 | 2.10E-11 |
| 316.94934 | 38.07  | 17.59 | 17.25 | 17.05 | 16.72 | 1.24E-04 | 2.49E-01 | 1.91E-02 | 4.49E-05 | 7.35E-01 | 3.84E-02 | 3.20E-01 |

|           |        |       |       |       |       |          |          |          |          |          |          |          |
|-----------|--------|-------|-------|-------|-------|----------|----------|----------|----------|----------|----------|----------|
| 316.98292 | 53.84  | 24.24 | 25.33 | 25.19 | 24.56 | 5.24E-09 | 7.91E-08 | 2.32E-06 | 3.20E-01 | 8.95E-01 | 6.88E-04 | 6.97E-03 |
| 316.99409 | 274.88 | 19.22 | 19.63 | 19.84 | 19.60 | 4.45E-02 | 2.40E-01 | 2.62E-02 | 3.46E-01 | 8.04E-01 | 9.98E-01 | 7.25E-01 |
| 317.02916 | 54.74  | 16.40 | 17.17 | 17.48 | 16.89 | 5.12E-09 | 3.26E-05 | 2.05E-09 | 2.11E-02 | 2.70E-01 | 3.89E-01 | 4.92E-03 |
| 317.03882 | 60.69  | 16.58 | 14.78 | 15.29 | 15.05 | 1.70E-06 | 2.73E-06 | 1.20E-03 | 1.48E-04 | 4.81E-01 | 8.82E-01 | 9.15E-01 |
| 317.05293 | 234.26 | 15.34 | 15.64 | 16.71 | 15.39 | 2.48E-06 | 7.06E-01 | 6.09E-06 | 9.98E-01 | 1.01E-03 | 8.35E-01 | 4.82E-05 |
| 317.1093  | 39.13  | 15.47 | 16.06 | 13.72 | 16.30 | 5.27E-12 | 3.09E-01 | 3.92E-06 | 8.69E-02 | 1.39E-09 | 9.14E-01 | 7.80E-11 |
| 317.14757 | 45.75  | 15.89 | 16.95 | 15.00 | 14.54 | 6.28E-12 | 4.08E-03 | 2.11E-02 | 2.06E-04 | 2.16E-08 | 2.65E-11 | 5.07E-01 |
| 317.17903 | 26.04  | 15.26 | 18.05 | 14.81 | 18.32 | 4.83E-35 | 7.27E-14 | 3.59E-01 | 6.41E-14 | 4.74E-14 | 8.02E-01 | 3.87E-14 |
| 317.21066 | 27.17  | 20.74 | 18.78 | 19.78 | 20.43 | 1.33E-14 | 9.71E-14 | 2.52E-04 | 5.75E-01 | 1.96E-04 | 7.49E-10 | 3.91E-02 |
| 317.23714 | 22.74  | 14.31 | 14.26 | 11.54 | 13.99 | 4.13E-17 | 9.99E-01 | 8.18E-14 | 7.70E-01 | 2.13E-13 | 8.61E-01 | 6.15E-11 |
| 317.24192 | 22.71  | 15.82 | 16.65 | 13.94 | 16.95 | 7.58E-18 | 4.59E-02 | 4.54E-08 | 3.43E-03 | 1.16E-13 | 8.09E-01 | 7.42E-14 |
| 317.2501  | 23.79  | 16.57 | 15.72 | 16.54 | 16.44 | 2.17E-02 | 2.77E-02 | 1.00E+00 | 9.74E-01 | 4.21E-02 | 1.16E-01 | 9.87E-01 |
| 317.54327 | 240.01 | 16.11 | 16.75 | 17.84 | 16.53 | 8.34E-04 | 4.44E-01 | 3.63E-04 | 7.80E-01 | 6.42E-02 | 9.61E-01 | 1.97E-02 |
| 317.62134 | 88.44  | 16.60 | 17.09 | 17.77 | 17.18 | 4.66E-06 | 1.17E-01 | 7.44E-07 | 4.65E-02 | 1.16E-02 | 9.74E-01 | 4.88E-02 |
| 317.74348 | 22.46  | 15.38 | 15.09 | 11.16 | 15.38 | 1.79E-23 | 8.99E-01 | 7.18E-14 | 1.00E+00 | 7.43E-14 | 9.11E-01 | 7.42E-14 |
| 317.85085 | 50.36  | 19.28 | 19.90 | 20.26 | 19.53 | 8.88E-06 | 9.89E-03 | 5.79E-06 | 5.95E-01 | 2.79E-01 | 2.93E-01 | 2.82E-03 |
| 317.90788 | 85.34  | 13.65 | 18.12 | 18.25 | 16.69 | 7.33E-30 | 4.07E-14 | 3.74E-14 | 1.10E-12 | 9.86E-01 | 2.42E-03 | 6.37E-04 |
| 317.94956 | 60.64  | 16.07 | 13.36 | 13.72 | 15.02 | 1.90E-09 | 1.34E-08 | 7.49E-07 | 9.13E-02 | 8.52E-01 | 2.07E-03 | 2.36E-02 |
| 317.98089 | 52.89  | 17.40 | 18.21 | 17.96 | 17.55 | 2.48E-08 | 8.47E-08 | 3.09E-04 | 7.20E-01 | 2.93E-01 | 5.32E-05 | 2.37E-02 |
| 317.98637 | 53.94  | 19.79 | 20.54 | 20.48 | 19.90 | 9.79E-10 | 2.05E-07 | 1.64E-06 | 8.57E-01 | 9.69E-01 | 3.65E-05 | 2.02E-04 |
| 317.99769 | 88.86  | 17.32 | 17.35 | 17.60 | 17.43 | 4.18E-01 | 9.98E-01 | 3.90E-01 | 9.39E-01 | 5.29E-01 | 9.80E-01 | 7.89E-01 |
| 318.02552 | 61.71  | 18.84 | 17.01 | 17.60 | 17.72 | 7.08E-14 | 9.54E-14 | 1.38E-07 | 5.24E-06 | 4.03E-02 | 1.16E-02 | 9.53E-01 |
| 318.04802 | 39.23  | 15.02 | 13.35 | 16.45 | 13.59 | 1.35E-14 | 9.34E-05 | 1.04E-03 | 1.64E-03 | 5.18E-13 | 9.33E-01 | 5.84E-11 |
| 318.05379 | 290    | 17.80 | 20.98 | 20.97 | 19.62 | 1.49E-37 | 3.65E-14 | 3.65E-14 | 8.24E-13 | 1.00E+00 | 2.54E-07 | 2.38E-07 |
| 318.0658  | 246.64 | 15.82 | 17.97 | 19.53 | 18.91 | 8.98E-10 | 9.19E-04 | 1.14E-09 | 1.23E-06 | 3.61E-02 | 3.97E-01 | 7.14E-01 |
| 318.12931 | 114.93 | 14.78 | 14.70 | 14.61 | 14.74 | 9.29E-01 | 9.92E-01 | 9.13E-01 | 9.99E-01 | 9.84E-01 | 9.99E-01 | 9.62E-01 |
| 318.19036 | 28.5   | 17.32 | 17.42 | 17.07 | 17.36 | 5.91E-02 | 8.61E-01 | 2.36E-01 | 9.90E-01 | 4.95E-02 | 9.70E-01 | 1.64E-01 |
| 318.21405 | 26.68  | 18.50 | 15.68 | 16.79 | 17.82 | 1.46E-12 | 1.52E-12 | 1.86E-05 | 2.56E-01 | 1.63E-02 | 4.15E-07 | 3.60E-02 |
| 318.22809 | 23.75  | 15.94 | 15.79 | 16.22 | 15.52 | 1.44E-02 | 8.85E-01 | 5.34E-01 | 1.83E-01 | 1.85E-01 | 5.83E-01 | 7.32E-03 |
| 318.51331 | 84.63  | 14.72 | 16.74 | 16.12 | 16.15 | 1.01E-09 | 5.76E-10 | 2.21E-05 | 2.92E-05 | 1.73E-01 | 2.38E-01 | 1.00E+00 |
| 318.55559 | 293.47 | 15.36 | 18.29 | 18.33 | 16.88 | 4.44E-23 | 7.49E-14 | 7.36E-14 | 5.25E-06 | 9.99E-01 | 5.14E-05 | 2.33E-05 |
| 318.56922 | 237.28 | 15.77 | 18.27 | 18.56 | 17.59 | 8.47E-24 | 7.23E-14 | 5.85E-14 | 3.41E-10 | 6.70E-01 | 6.26E-02 | 2.01E-03 |
| 318.68901 | 50.45  | 15.63 | 15.73 | 16.29 | 15.71 | 1.67E-01 | 9.88E-01 | 1.61E-01 | 9.94E-01 | 3.26E-01 | 1.00E+00 | 3.16E-01 |
| 318.7191  | 46.26  | 19.66 | 19.80 | 19.97 | 19.28 | 2.78E-03 | 8.61E-01 | 2.84E-01 | 1.55E-01 | 7.73E-01 | 2.99E-02 | 1.34E-03 |
| 318.78336 | 45.08  | 14.27 | 10.74 | 14.56 | 12.13 | 3.18E-21 | 7.46E-14 | 8.71E-01 | 1.03E-06 | 7.42E-14 | 4.40E-03 | 4.87E-08 |
| 318.79176 | 30.45  | 18.67 | 8.97  | 9.59  | 10.62 | 2.76E-93 | 3.65E-14 | 3.65E-14 | 3.65E-14 | 1.74E-01 | 2.29E-06 | 6.55E-03 |
| 318.81069 | 44.58  | 15.70 | 15.08 | 15.60 | 15.20 | 3.23E-02 | 5.12E-02 | 9.79E-01 | 1.87E-01 | 1.45E-01 | 9.62E-01 | 3.84E-01 |
| 318.8549  | 47.65  | 14.58 | 14.49 | 15.18 | 14.90 | 5.14E-02 | 9.88E-01 | 1.09E-01 | 6.39E-01 | 6.07E-02 | 4.67E-01 | 7.58E-01 |
| 318.89953 | 45.49  | 16.26 | 16.46 | 17.24 | 17.00 | 4.90E-05 | 8.21E-01 | 1.03E-04 | 8.62E-03 | 4.48E-03 | 1.07E-01 | 7.40E-01 |
| 318.90784 | 57.6   | 16.70 | 18.58 | 18.73 | 18.50 | 9.74E-25 | 7.44E-14 | 6.49E-14 | 7.33E-14 | 8.60E-01 | 9.81E-01 | 6.57E-01 |
| 318.92429 | 42.75  | 15.23 | 18.42 | 17.46 | 17.89 | 7.40E-35 | 3.65E-14 | 7.32E-14 | 4.19E-14 | 1.88E-04 | 1.11E-01 | 2.47E-01 |
| 318.94067 | 40.47  | 17.21 | 17.03 | 17.53 | 17.56 | 1.19E-03 | 5.90E-01 | 1.36E-01 | 1.02E-01 | 5.67E-03 | 4.22E-03 | 9.97E-01 |
| 318.97648 | 68.69  | 20.62 | 21.79 | 21.69 | 21.13 | 1.78E-13 | 7.41E-12 | 2.23E-10 | 7.88E-03 | 9.25E-01 | 5.12E-04 | 4.14E-03 |
| 318.98617 | 56.27  | 18.02 | 18.48 | 18.36 | 18.22 | 1.79E-04 | 1.07E-04 | 7.32E-03 | 2.59E-01 | 6.67E-01 | 8.88E-02 | 5.85E-01 |
| 319.02864 | 62.12  | 19.53 | 18.47 | 18.56 | 18.06 | 2.17E-10 | 2.82E-06 | 1.81E-05 | 2.14E-10 | 9.72E-01 | 2.51E-01 | 1.02E-01 |
| 319.04572 | 62.22  | 16.46 | 16.33 | 16.47 | 15.44 | 2.73E-03 | 9.73E-01 | 1.00E+00 | 5.00E-03 | 9.66E-01 | 2.43E-02 | 5.45E-03 |
| 319.06207 | 300.71 | 16.28 | 16.99 | 15.92 | 17.84 | 2.31E-12 | 1.97E-02 | 4.23E-01 | 1.17E-08 | 1.31E-04 | 6.00E-03 | 6.39E-12 |
| 319.06491 | 67.8   | 12.77 | 11.61 | 11.94 | 12.17 | 3.84E-02 | 2.45E-02 | 1.71E-01 | 4.81E-01 | 8.57E-01 | 5.61E-01 | 9.49E-01 |
| 319.12427 | 102.61 | 15.19 | 17.12 | 17.33 | 16.80 | 5.33E-16 | 5.12E-12 | 9.51E-14 | 1.80E-08 | 8.62E-01 | 6.38E-01 | 2.08E-01 |
| 319.16131 | 92.5   | 16.44 | 18.34 | 18.33 | 17.91 | 1.57E-30 | 3.83E-14 | 3.76E-14 | 7.29E-14 | 1.00E+00 | 5.36E-02 | 5.68E-02 |
| 319.19427 | 28.97  | 18.31 | 22.03 | 20.63 | 21.84 | 1.23E-62 | 3.65E-14 | 3.65E-14 | 3.65E-14 | 2.11E-13 | 6.90E-01 | 3.89E-10 |
| 319.22511 | 39.93  | 20.22 | 18.16 | 18.58 | 19.30 | 1.58E-28 | 3.67E-14 | 7.25E-14 | 5.74E-07 | 5.84E-02 | 1.56E-09 | 2.12E-04 |
| 319.23739 | 22.07  | 14.67 | 12.27 | 16.06 | 14.05 | 1.80E-26 | 1.34E-13 | 1.34E-05 | 1.65E-01 | 3.67E-14 | 1.11E-07 | 1.71E-09 |
| 319.3958  | 301.91 | 14.46 | 15.01 | 14.44 | 13.78 | 7.60E-04 | 1.93E-01 | 1.00E+00 | 7.51E-02 | 1.81E-01 | 1.94E-04 | 1.02E-01 |
| 319.5902  | 84.31  | 18.64 | 15.94 | 17.34 | 16.83 | 3.45E-13 | 1.45E-13 | 4.83E-04 | 1.06E-06 | 2.12E-04 | 4.87E-02 | 4.45E-01 |
| 319.67064 | 28.97  | 17.40 | 20.24 | 20.05 | 19.67 | 7.64E-34 | 3.65E-14 | 3.70E-14 | 7.25E-14 | 8.04E-01 | 6.03E-02 | 3.49E-01 |
| 319.84804 | 52.13  | 19.00 | 19.49 | 19.90 | 19.30 | 4.31E-05 | 4.48E-02 | 1.21E-05 | 3.95E-01 | 1.41E-01 | 7.74E-01 | 1.31E-02 |
| 319.91611 | 44.82  | 16.10 | 15.50 | 15.77 | 16.15 | 5.14E-02 | 8.83E-02 | 5.72E-01 | 9.97E-01 | 7.16E-01 | 7.45E-02 | 4.89E-01 |
| 319.94381 | 46.35  | 15.80 | 16.00 | 15.95 | 15.75 | 5.67E-01 | 7.34E-01 | 8.65E-01 | 9.95E-01 | 9.94E-01 | 6.20E-01 | 7.63E-01 |
| 319.95425 | 305.53 | 15.79 | 14.22 | 12.20 | 14.34 | 8.11E-18 | 1.05E-04 | 7.43E-14 | 6.11E-04 | 6.05E-07 | 9.89E-01 | 2.40E-07 |
| 319.98151 | 52.52  | 16.46 | 16.31 | 16.17 | 15.73 | 1.51E-03 | 8.50E-01 | 3.80E-01 | 7.38E-04 | 8.73E-01 | 1.52E-02 | 1.01E-01 |
| 319.9968  | 266.8  | 17.76 | 18.06 | 17.61 | 17.38 | 2.13E-02 | 4.86E-01 | 8.92E-01 | 2.73E-01 | 1.63E-01 | 1.18E-02 | 6.93E-01 |
| 320.00509 | 84.99  | 15.72 | 19.72 | 19.45 | 18.67 | 2.02E-39 | 3.65E-14 | 3.65E-14 | 6.45E-14 | 7.39E-01 | 1.40E-03 | 3.12E-02 |
| 320.03263 | 288.15 | 15.03 | 17.14 | 17.08 | 16.49 | 3.27E-08 | 3.50E-07 | 6.14E-07 | 1.08E-03 | 9.99E-01 | 3.68E-01 | 4.51E-01 |
| 320.07549 | 45.28  | 15.25 | 15.84 | 15.40 | 15.51 | 9.25E-02 | 6.16E-02 | 9.23E-01 | 7.04E-01 | 2.58E-01 | 5.49E-01 | 9.68E-01 |
| 320.10877 | 84     | 15.61 | 17.24 | 17.44 | 17.14 | 2.14E-14 | 2.47E-10 | 8.85E-13 | 6.88E-09 | 8.29E-01 | 9.79E-01 | 6.07E-01 |
| 320.17227 | 28.94  | 15.94 | 18.30 | 18.22 | 17.55 | 1.70E-15 | 3.26E-13 | 8.09E-13 | 1.10E-06 | 9.95E-01 | 7.73E-02 | 1.27E-01 |
| 320.1976  | 25.78  | 16.43 | 19.34 | 17.65 | 19.14 | 5.46E-35 | 3.65E-14 | 1.14E-07 | 3.72E-14 | 1.48E-12 | 7.97E-01 | 1.07E-09 |

|           |        |       |       |       |       |          |          |          |          |          |          |          |
|-----------|--------|-------|-------|-------|-------|----------|----------|----------|----------|----------|----------|----------|
| 320.2219  | 210.93 | 16.44 | 11.44 | 12.11 | 12.52 | 8.71E-51 | 3.65E-14 | 3.65E-14 | 3.65E-14 | 7.02E-02 | 1.05E-03 | 4.74E-01 |
| 320.22879 | 36.89  | 17.13 | 13.67 | 15.16 | 15.97 | 1.90E-13 | 1.11E-13 | 1.47E-05 | 3.28E-02 | 2.99E-03 | 2.02E-06 | 2.41E-01 |
| 320.24521 | 22.33  | 15.06 | 16.47 | 18.42 | 17.33 | 3.51E-58 | 7.25E-14 | 3.65E-14 | 3.65E-14 | 3.67E-14 | 8.54E-07 | 2.64E-10 |
| 320.53439 | 280.77 | 16.58 | 18.16 | 18.33 | 17.14 | 1.04E-07 | 1.41E-05 | 9.02E-07 | 3.36E-01 | 9.55E-01 | 1.85E-02 | 3.41E-03 |
| 320.71636 | 45.75  | 20.30 | 20.45 | 20.61 | 19.98 | 9.10E-05 | 6.88E-01 | 8.30E-02 | 7.38E-02 | 6.09E-01 | 4.41E-03 | 3.71E-05 |
| 320.74662 | 22.27  | 14.69 | 14.46 | 17.37 | 16.61 | 2.60E-20 | 8.93E-01 | 8.20E-14 | 5.36E-08 | 7.43E-14 | 3.80E-09 | 9.82E-02 |
| 320.87049 | 21.94  | 16.84 | 13.36 | 13.89 | 14.84 | 9.02E-31 | 3.65E-14 | 5.18E-14 | 2.09E-11 | 1.96E-01 | 1.46E-06 | 3.93E-03 |
| 320.87799 | 41.59  | 17.23 | 13.24 | 14.52 | 13.70 | 5.23E-18 | 7.56E-14 | 7.35E-09 | 6.03E-13 | 2.16E-02 | 7.38E-01 | 2.79E-01 |
| 320.89763 | 43.37  | 14.38 | 13.96 | 14.29 | 14.24 | 7.21E-01 | 6.77E-01 | 9.95E-01 | 9.84E-01 | 8.27E-01 | 8.92E-01 | 9.99E-01 |
| 320.90752 | 24.34  | 14.55 | 13.34 | 13.90 | 13.96 | 6.86E-04 | 1.82E-04 | 9.52E-02 | 1.86E-01 | 2.30E-01 | 1.68E-01 | 9.96E-01 |
| 320.92141 | 31.18  | 15.13 | 15.62 | 16.07 | 15.52 | 1.05E-02 | 2.89E-01 | 4.09E-03 | 5.13E-01 | 3.92E-01 | 9.87E-01 | 2.39E-01 |
| 320.98922 | 41.21  | 18.55 | 19.93 | 20.03 | 20.20 | 1.72E-20 | 2.70E-13 | 7.61E-14 | 7.38E-14 | 9.47E-01 | 4.35E-01 | 7.59E-01 |
| 320.99185 | 96.7   | 18.37 | 18.24 | 18.95 | 18.26 | 2.66E-03 | 9.21E-01 | 2.64E-02 | 9.49E-01 | 5.21E-03 | 1.00E+00 | 8.75E-03 |
| 321.00088 | 90.47  | 17.14 | 18.19 | 17.59 | 17.72 | 8.77E-07 | 1.37E-07 | 6.39E-02 | 1.12E-02 | 7.23E-03 | 6.92E-02 | 9.01E-01 |
| 321.00721 | 72.61  | 12.69 | 14.07 | 12.98 | 14.10 | 1.69E-02 | 5.21E-02 | 9.49E-01 | 5.56E-02 | 1.95E-01 | 1.00E+00 | 1.99E-01 |
| 321.02121 | 199.32 | 15.13 | 15.95 | 16.51 | 16.90 | 3.30E-11 | 4.19E-03 | 1.48E-07 | 6.69E-11 | 1.11E-01 | 1.41E-03 | 4.09E-01 |
| 321.05367 | 136.56 | 15.83 | 16.96 | 17.44 | 15.34 | 3.20E-13 | 2.66E-04 | 4.78E-08 | 2.81E-01 | 3.05E-01 | 2.76E-07 | 1.60E-11 |
| 321.13093 | 32     | 18.66 | 19.24 | 18.86 | 19.88 | 9.18E-09 | 1.16E-02 | 7.13E-01 | 7.92E-09 | 1.91E-01 | 8.25E-03 | 2.84E-06 |
| 321.14622 | 41.68  | 16.69 | 12.40 | 12.98 | 14.81 | 1.15E-31 | 3.65E-14 | 4.65E-14 | 3.31E-07 | 3.06E-01 | 1.91E-10 | 1.28E-06 |
| 321.20858 | 29.26  | 17.19 | 20.34 | 18.69 | 20.14 | 8.61E-50 | 3.65E-14 | 7.82E-14 | 3.65E-14 | 7.45E-14 | 6.87E-01 | 6.86E-13 |
| 321.24019 | 48.36  | 20.13 | 18.50 | 18.84 | 18.70 | 6.07E-40 | 3.65E-14 | 3.72E-14 | 3.65E-14 | 1.10E-02 | 3.10E-01 | 5.67E-01 |
| 321.25297 | 22.25  | 13.44 | 14.19 | 16.71 | 15.98 | 7.57E-18 | 1.71E-01 | 7.41E-14 | 5.96E-10 | 8.47E-10 | 3.44E-05 | 2.38E-01 |
| 321.75444 | 22.06  | 14.25 | 13.40 | 15.93 | 15.59 | 3.33E-12 | 6.66E-02 | 1.02E-05 | 1.16E-03 | 6.64E-11 | 4.82E-08 | 7.80E-01 |
| 321.84485 | 49.89  | 16.87 | 17.48 | 17.53 | 16.79 | 1.31E-02 | 1.26E-01 | 7.95E-02 | 9.92E-01 | 9.98E-01 | 9.03E-02 | 5.66E-02 |
| 321.89235 | 110.94 | 14.17 | 19.11 | 14.03 | 18.60 | 2.47E-23 | 7.52E-14 | 9.94E-01 | 1.23E-12 | 7.36E-14 | 8.11E-01 | 8.12E-13 |
| 321.92308 | 96.32  | 13.20 | 17.49 | 12.86 | 16.76 | 5.10E-26 | 7.43E-14 | 8.66E-01 | 1.48E-12 | 7.36E-14 | 4.10E-01 | 1.19E-13 |
| 321.93451 | 53.29  | 21.69 | 21.31 | 21.67 | 20.75 | 3.89E-07 | 1.14E-01 | 9.99E-01 | 1.22E-06 | 1.68E-01 | 1.25E-02 | 4.00E-06 |
| 321.9401  | 134.84 | 12.83 | 13.05 | 10.94 | 13.54 | 5.94E-19 | 8.29E-01 | 1.43E-11 | 3.86E-02 | 4.49E-13 | 2.77E-01 | 7.49E-14 |
| 321.99184 | 41.03  | 15.38 | 15.20 | 14.92 | 16.09 | 5.63E-03 | 9.43E-01 | 4.61E-01 | 1.29E-01 | 8.21E-01 | 4.20E-02 | 2.88E-03 |
| 321.99966 | 272.54 | 13.60 | 17.41 | 18.01 | 16.33 | 1.84E-29 | 6.01E-14 | 3.67E-14 | 3.79E-12 | 3.45E-01 | 1.85E-02 | 4.28E-05 |
| 322.01133 | 111.71 | 17.14 | 18.58 | 17.52 | 17.71 | 2.82E-08 | 6.63E-09 | 3.11E-01 | 6.68E-02 | 5.36E-05 | 2.10E-03 | 8.60E-01 |
| 322.02835 | 258.46 | 13.98 | 16.70 | 19.87 | 16.87 | 1.05E-24 | 2.28E-07 | 3.72E-14 | 8.79E-08 | 3.84E-09 | 9.89E-01 | 5.24E-08 |
| 322.05481 | 46.04  | 22.72 | 23.00 | 23.50 | 22.78 | 1.67E-03 | 5.62E-01 | 1.61E-03 | 9.93E-01 | 1.02E-01 | 7.71E-01 | 8.29E-03 |
| 322.06387 | 140.12 | 14.47 | 16.97 | 15.85 | 14.46 | 5.37E-05 | 1.80E-04 | 8.44E-02 | 1.00E+00 | 2.51E-01 | 4.41E-04 | 1.12E-01 |
| 322.10678 | 69.33  | 19.76 | 21.16 | 20.93 | 20.84 | 1.73E-08 | 5.33E-08 | 5.35E-06 | 6.73E-05 | 7.79E-01 | 5.67E-01 | 9.81E-01 |
| 322.12445 | 99.49  | 13.15 | 15.10 | 14.71 | 15.56 | 3.80E-07 | 4.77E-05 | 1.53E-03 | 5.70E-07 | 8.14E-01 | 7.31E-01 | 2.30E-01 |
| 322.18719 | 53.48  | 13.29 | 15.27 | 14.10 | 14.23 | 2.97E-03 | 9.34E-04 | 3.89E-01 | 2.95E-01 | 1.23E-01 | 2.25E-01 | 9.96E-01 |
| 322.21323 | 24.62  | 15.36 | 17.31 | 16.01 | 17.33 | 2.02E-12 | 7.70E-10 | 1.03E-01 | 1.32E-09 | 1.10E-04 | 1.00E+00 | 1.25E-04 |
| 322.23765 | 215.95 | 16.34 | 10.75 | 11.90 | 12.50 | 1.78E-44 | 3.65E-14 | 3.65E-14 | 4.21E-14 | 2.88E-03 | 2.94E-06 | 2.82E-01 |
| 322.24325 | 51.84  | 17.43 | 15.19 | 16.79 | 16.30 | 2.97E-09 | 6.91E-10 | 2.01E-01 | 5.69E-03 | 2.70E-05 | 9.35E-03 | 5.08E-01 |
| 322.2737  | 22.77  | 14.88 | 8.50  | 8.20  | 11.87 | 5.04E-35 | 3.65E-14 | 3.65E-14 | 6.81E-08 | 9.33E-01 | 4.18E-09 | 1.09E-10 |
| 322.53793 | 89.02  | 14.58 | 16.16 | 15.93 | 15.16 | 1.78E-07 | 6.45E-07 | 2.40E-05 | 1.97E-01 | 8.58E-01 | 6.90E-03 | 5.96E-02 |
| 322.55558 | 273.99 | 12.11 | 17.29 | 17.14 | 15.83 | 7.50E-30 | 3.83E-14 | 3.94E-14 | 9.33E-14 | 9.87E-01 | 7.53E-03 | 1.88E-02 |
| 322.6308  | 23.51  | 15.80 | 18.70 | 16.29 | 18.68 | 1.04E-13 | 5.94E-10 | 6.58E-01 | 1.87E-09 | 5.63E-07 | 1.00E+00 | 1.25E-06 |
| 322.71374 | 45.99  | 19.65 | 19.68 | 19.87 | 19.26 | 6.30E-05 | 9.97E-01 | 2.56E-01 | 1.05E-02 | 3.94E-01 | 7.58E-03 | 1.72E-05 |
| 322.80283 | 51.62  | 15.59 | 16.32 | 16.28 | 16.23 | 1.06E-10 | 6.07E-09 | 2.15E-08 | 8.01E-07 | 9.92E-01 | 8.79E-01 | 9.64E-01 |
| 322.81094 | 48.6   | 16.63 | 16.79 | 16.66 | 17.10 | 1.99E-01 | 9.04E-01 | 9.99E-01 | 1.87E-01 | 9.52E-01 | 5.61E-01 | 2.61E-01 |
| 322.82889 | 44.09  | 18.78 | 18.64 | 18.98 | 18.61 | 2.20E-02 | 6.44E-01 | 4.01E-01 | 5.48E-01 | 4.16E-02 | 9.98E-01 | 3.06E-02 |
| 322.93601 | 48.91  | 17.28 | 16.48 | 16.18 | 16.02 | 4.74E-06 | 9.10E-03 | 8.55E-05 | 1.18E-05 | 6.37E-01 | 3.10E-01 | 9.35E-01 |
| 322.95281 | 86.82  | 15.69 | 17.48 | 17.90 | 16.97 | 2.45E-08 | 1.02E-05 | 2.31E-08 | 4.04E-03 | 6.68E-01 | 5.51E-01 | 7.27E-02 |
| 322.96883 | 113.7  | 15.70 | 17.44 | 13.58 | 16.41 | 1.76E-27 | 6.11E-08 | 3.07E-11 | 8.21E-02 | 3.67E-14 | 6.02E-03 | 7.41E-14 |
| 322.98777 | 41.22  | 15.14 | 15.95 | 16.47 | 16.77 | 7.29E-08 | 1.70E-02 | 1.08E-05 | 1.38E-07 | 2.58E-01 | 2.76E-02 | 7.26E-01 |
| 322.99229 | 301.9  | 16.39 | 19.24 | 19.72 | 16.91 | 5.05E-26 | 7.51E-14 | 6.56E-14 | 3.66E-01 | 4.45E-01 | 1.44E-10 | 8.76E-14 |
| 323.00513 | 51.63  | 18.06 | 16.31 | 16.45 | 16.58 | 9.11E-16 | 2.27E-13 | 6.31E-12 | 1.03E-09 | 9.14E-01 | 6.18E-01 | 9.36E-01 |
| 323.01455 | 102.86 | 20.25 | 23.00 | 22.36 | 21.67 | 8.66E-19 | 7.43E-14 | 3.26E-12 | 7.33E-06 | 1.15E-01 | 6.13E-05 | 8.73E-02 |
| 323.02734 | 51.35  | 14.87 | 11.39 | 15.37 | 12.94 | 5.97E-25 | 7.36E-14 | 4.78E-01 | 1.34E-06 | 5.72E-14 | 2.40E-04 | 2.01E-09 |
| 323.03808 | 54.37  | 19.74 | 19.62 | 19.45 | 19.44 | 5.98E-02 | 7.50E-01 | 9.35E-02 | 9.74E-02 | 5.76E-01 | 5.63E-01 | 1.00E+00 |
| 323.05546 | 48.56  | 19.87 | 19.64 | 20.21 | 19.56 | 1.43E-03 | 5.25E-01 | 1.76E-01 | 3.04E-01 | 6.05E-03 | 9.78E-01 | 1.98E-03 |
| 323.06947 | 191.92 | 11.63 | 15.94 | 15.76 | 15.71 | 3.48E-25 | 7.18E-14 | 7.45E-14 | 7.49E-14 | 9.75E-01 | 9.53E-01 | 9.99E-01 |
| 323.10961 | 61.05  | 16.97 | 17.65 | 17.31 | 17.59 | 2.18E-02 | 2.42E-02 | 4.75E-01 | 6.07E-02 | 5.05E-01 | 9.94E-01 | 6.92E-01 |
| 323.14487 | 97.87  | 18.48 | 18.81 | 18.77 | 18.50 | 2.28E-04 | 2.11E-03 | 9.07E-03 | 9.96E-01 | 9.69E-01 | 8.59E-03 | 2.96E-02 |
| 323.1618  | 44.84  | 17.45 | 16.04 | 16.58 | 16.28 | 1.16E-08 | 1.54E-08 | 7.71E-04 | 6.19E-06 | 9.97E-02 | 7.51E-01 | 5.99E-01 |
| 323.20551 | 62.13  | 14.29 | 14.64 | 14.81 | 15.03 | 3.23E-01 | 8.21E-01 | 5.51E-01 | 2.73E-01 | 9.74E-01 | 7.88E-01 | 9.54E-01 |
| 323.21742 | 44.2   | 17.48 | 14.65 | 15.90 | 15.59 | 7.93E-17 | 7.36E-14 | 1.07E-06 | 1.52E-08 | 2.92E-04 | 1.48E-02 | 7.57E-01 |
| 323.22539 | 24.14  | 14.77 | 17.48 | 16.92 | 16.96 | 1.01E-21 | 7.19E-14 | 1.26E-13 | 2.06E-13 | 1.55E-01 | 2.30E-01 | 9.99E-01 |
| 323.25772 | 23.53  | 16.36 | 12.13 | 13.83 | 15.00 | 1.10E-23 | 4.21E-14 | 1.33E-10 | 1.82E-03 | 3.97E-05 | 8.29E-12 | 1.23E-02 |
| 323.60912 | 84.95  | 15.70 | 17.62 | 16.53 | 16.46 | 8.16E-15 | 7.41E-14 | 6.05E-04 | 3.06E-03 | 5.91E-06 | 3.18E-06 | 9.91E-01 |
| 323.65995 | 31.46  | 16.95 | 18.51 | 18.11 | 17.16 | 4.96E-08 | 4.72E-07 | 2.74E-04 | 8.88E-01 | 4.95E-01 | 5.29E-05 | 8.23E-03 |

|           |        |       |       |       |       |          |          |          |          |          |          |          |
|-----------|--------|-------|-------|-------|-------|----------|----------|----------|----------|----------|----------|----------|
| 323.73918 | 23.14  | 13.80 | 13.84 | 11.03 | 14.70 | 1.96E-19 | 9.99E-01 | 9.80E-13 | 6.65E-02 | 2.22E-12 | 1.05E-01 | 7.47E-14 |
| 323.8902  | 101.67 | 13.15 | 13.49 | 9.98  | 14.12 | 2.16E-25 | 7.67E-01 | 7.51E-14 | 3.36E-02 | 7.51E-14 | 3.06E-01 | 4.94E-14 |
| 323.9321  | 53.14  | 18.00 | 17.30 | 17.42 | 17.00 | 1.09E-06 | 4.75E-04 | 5.53E-03 | 5.25E-07 | 8.99E-01 | 3.95E-01 | 1.09E-01 |
| 324.01897 | 287.26 | 15.68 | 16.27 | 16.76 | 16.67 | 1.05E-04 | 9.70E-02 | 1.60E-04 | 1.13E-03 | 2.40E-01 | 4.52E-01 | 9.86E-01 |
| 324.02198 | 81.87  | 16.37 | 12.08 | 10.12 | 11.98 | 1.05E-29 | 7.39E-14 | 3.65E-14 | 7.57E-14 | 3.62E-04 | 9.98E-01 | 1.09E-03 |
| 324.03295 | 48.59  | 17.14 | 15.12 | 15.73 | 16.21 | 2.79E-10 | 1.07E-10 | 6.47E-06 | 9.13E-03 | 1.65E-01 | 2.09E-03 | 3.67E-01 |
| 324.04509 | 244.18 | 16.39 | 18.26 | 17.72 | 18.33 | 2.27E-20 | 7.27E-14 | 9.34E-10 | 7.47E-14 | 4.73E-02 | 9.90E-01 | 2.41E-02 |
| 324.05295 | 46.16  | 18.93 | 17.95 | 18.67 | 18.27 | 8.68E-03 | 6.91E-03 | 8.21E-01 | 1.44E-01 | 9.06E-02 | 7.44E-01 | 5.81E-01 |
| 324.05894 | 257.51 | 21.81 | 24.32 | 24.33 | 23.51 | 3.34E-47 | 3.65E-14 | 3.65E-14 | 5.76E-14 | 1.00E+00 | 4.17E-06 | 2.17E-06 |
| 324.10205 | 56.86  | 15.28 | 15.20 | 14.73 | 15.28 | 3.09E-01 | 9.96E-01 | 3.39E-01 | 1.00E+00 | 5.04E-01 | 9.96E-01 | 3.90E-01 |
| 324.11079 | 78.51  | 15.57 | 15.40 | 13.86 | 15.66 | 1.13E-06 | 9.66E-01 | 1.15E-05 | 9.93E-01 | 1.69E-04 | 8.97E-01 | 1.24E-05 |
| 324.14036 | 26.46  | 15.38 | 18.25 | 17.53 | 18.05 | 1.66E-22 | 7.21E-14 | 1.42E-12 | 7.49E-14 | 5.67E-02 | 8.96E-01 | 2.91E-01 |
| 324.1625  | 32.67  | 16.11 | 14.07 | 16.05 | 15.48 | 7.52E-07 | 2.15E-06 | 9.99E-01 | 3.96E-01 | 7.45E-06 | 3.98E-03 | 4.99E-01 |
| 324.28934 | 23.77  | 17.46 | 14.02 | 15.03 | 15.77 | 3.08E-45 | 3.65E-14 | 3.65E-14 | 7.78E-14 | 1.71E-06 | 7.63E-14 | 1.35E-03 |
| 324.65324 | 25.37  | 15.95 | 17.61 | 14.34 | 14.49 | 4.88E-90 | 3.65E-14 | 3.65E-14 | 3.65E-14 | 3.65E-14 | 3.65E-14 | 4.76E-01 |
| 324.71128 | 46.04  | 18.25 | 17.87 | 18.09 | 17.46 | 5.61E-06 | 5.50E-02 | 7.23E-01 | 3.00E-06 | 4.51E-01 | 4.74E-02 | 3.72E-04 |
| 324.80046 | 44.34  | 16.03 | 16.47 | 16.44 | 16.14 | 2.74E-03 | 8.14E-03 | 1.74E-02 | 8.80E-01 | 9.93E-01 | 9.77E-02 | 1.65E-01 |
| 324.808   | 48.62  | 16.96 | 17.27 | 17.18 | 17.53 | 9.76E-02 | 5.03E-01 | 7.50E-01 | 5.81E-02 | 9.79E-01 | 6.69E-01 | 4.21E-01 |
| 324.82654 | 44.11  | 17.94 | 17.63 | 18.02 | 17.76 | 1.07E-02 | 6.04E-02 | 9.13E-01 | 4.67E-01 | 1.20E-02 | 7.69E-01 | 1.76E-01 |
| 324.83657 | 31.1   | 15.09 | 12.41 | 16.97 | 16.00 | 3.06E-40 | 7.58E-14 | 8.23E-11 | 5.28E-03 | 3.65E-14 | 3.67E-14 | 3.60E-03 |
| 324.84464 | 44.52  | 17.33 | 18.59 | 19.15 | 18.20 | 5.05E-18 | 5.34E-10 | 7.41E-14 | 4.51E-05 | 1.99E-02 | 1.94E-01 | 1.32E-05 |
| 324.8525  | 47.9   | 15.50 | 16.73 | 16.88 | 16.62 | 1.34E-16 | 4.29E-12 | 8.18E-14 | 7.64E-10 | 8.14E-01 | 9.12E-01 | 4.23E-01 |
| 324.89181 | 23.43  | 18.75 | 14.33 | 16.69 | 15.93 | 6.96E-33 | 3.65E-14 | 2.62E-10 | 7.27E-14 | 2.41E-12 | 5.28E-06 | 7.38E-02 |
| 324.96167 | 36.4   | 15.96 | 17.92 | 17.35 | 17.05 | 7.92E-26 | 3.72E-14 | 7.61E-14 | 1.17E-09 | 3.10E-03 | 2.98E-06 | 2.73E-01 |
| 325.00518 | 66.81  | 17.47 | 15.36 | 14.50 | 15.42 | 9.43E-11 | 4.59E-06 | 5.00E-11 | 1.56E-05 | 1.86E-01 | 9.99E-01 | 1.57E-01 |
| 325.02011 | 63.43  | 17.25 | 16.05 | 16.34 | 15.67 | 5.14E-14 | 4.35E-09 | 8.28E-06 | 1.55E-13 | 4.44E-01 | 2.19E-01 | 4.42E-03 |
| 325.04279 | 265.31 | 17.59 | 22.09 | 21.19 | 20.58 | 3.42E-20 | 7.42E-14 | 1.77E-13 | 2.00E-09 | 1.91E-01 | 7.27E-03 | 5.48E-01 |
| 325.05609 | 45.83  | 15.11 | 12.97 | 14.36 | 13.76 | 4.86E-06 | 1.81E-06 | 2.47E-01 | 6.95E-03 | 5.12E-03 | 2.64E-01 | 4.81E-01 |
| 325.05636 | 256.16 | 13.20 | 15.77 | 16.17 | 14.79 | 2.02E-23 | 7.54E-14 | 5.85E-14 | 2.48E-07 | 4.83E-01 | 4.55E-03 | 1.64E-05 |
| 325.05644 | 146.12 | 11.06 | 15.19 | 15.50 | 14.93 | 1.19E-25 | 7.36E-14 | 5.83E-14 | 7.57E-14 | 8.80E-01 | 9.32E-01 | 5.45E-01 |
| 325.06209 | 263.81 | 18.35 | 19.79 | 19.73 | 18.91 | 8.58E-26 | 6.38E-14 | 7.07E-14 | 3.14E-04 | 9.73E-01 | 1.26E-08 | 8.99E-08 |
| 325.09255 | 96.69  | 17.76 | 20.95 | 20.96 | 19.97 | 1.07E-48 | 3.65E-14 | 3.65E-14 | 4.36E-14 | 1.00E+00 | 7.48E-06 | 4.49E-06 |
| 325.11172 | 122.32 | 17.75 | 18.22 | 18.20 | 17.08 | 1.99E-02 | 6.02E-01 | 6.33E-01 | 3.33E-01 | 1.00E+00 | 2.77E-02 | 3.05E-02 |
| 325.1126  | 248.56 | 14.09 | 17.46 | 17.71 | 16.51 | 4.40E-15 | 7.32E-12 | 2.19E-13 | 1.93E-06 | 9.49E-01 | 1.87E-01 | 5.43E-02 |
| 325.1602  | 246.75 | 17.96 | 18.77 | 19.09 | 16.61 | 2.78E-07 | 2.19E-01 | 3.55E-02 | 1.12E-02 | 8.78E-01 | 1.45E-05 | 3.62E-07 |
| 325.20077 | 23.78  | 14.77 | 14.70 | 16.52 | 15.58 | 2.75E-04 | 9.99E-01 | 8.36E-04 | 3.09E-01 | 7.73E-04 | 2.65E-01 | 2.10E-01 |
| 325.21594 | 24.14  | 16.57 | 12.22 | 13.92 | 14.64 | 6.05E-19 | 7.23E-14 | 6.43E-09 | 7.38E-05 | 5.84E-04 | 7.66E-07 | 3.57E-01 |
| 325.23718 | 219.56 | 16.54 | 12.88 | 13.91 | 14.40 | 7.92E-09 | 3.28E-09 | 2.52E-05 | 1.59E-03 | 2.86E-01 | 5.45E-02 | 8.34E-01 |
| 325.2736  | 214.83 | 15.91 | 12.04 | 13.25 | 13.28 | 2.52E-06 | 1.14E-06 | 1.36E-03 | 2.51E-03 | 3.59E-01 | 3.66E-01 | 1.00E+00 |
| 325.29172 | 294.04 | 19.52 | 18.86 | 18.83 | 18.72 | 3.15E-02 | 1.15E-01 | 8.97E-02 | 4.35E-02 | 1.00E+00 | 9.71E-01 | 9.83E-01 |
| 325.3097  | 24.29  | 15.34 | 7.20  | 7.81  | 7.89  | 1.71E-51 | 3.65E-14 | 3.65E-14 | 3.65E-14 | 5.58E-01 | 4.80E-01 | 9.98E-01 |
| 325.51368 | 298.99 | 15.65 | 15.77 | 15.82 | 15.18 | 7.13E-02 | 9.67E-01 | 9.09E-01 | 2.47E-01 | 9.97E-01 | 1.15E-01 | 7.09E-02 |
| 325.5482  | 89.21  | 14.54 | 16.21 | 16.43 | 14.82 | 3.18E-13 | 2.40E-08 | 1.93E-10 | 7.54E-01 | 8.66E-01 | 1.53E-05 | 3.34E-07 |
| 325.61034 | 97.54  | 21.07 | 16.63 | 18.27 | 17.06 | 7.54E-37 | 3.65E-14 | 7.41E-14 | 3.65E-14 | 1.58E-06 | 5.45E-01 | 9.19E-04 |
| 325.68872 | 27.71  | 15.76 | 18.16 | 14.28 | 14.78 | 5.96E-40 | 7.25E-14 | 7.40E-09 | 3.98E-04 | 3.65E-14 | 3.65E-14 | 1.83E-01 |
| 325.88793 | 56.09  | 16.80 | 14.13 | 15.18 | 14.62 | 4.07E-09 | 4.86E-09 | 6.48E-04 | 3.88E-06 | 6.79E-02 | 6.91E-01 | 5.65E-01 |
| 325.95945 | 44.83  | 15.60 | 14.73 | 15.40 | 15.40 | 9.12E-04 | 5.20E-04 | 7.89E-01 | 7.93E-01 | 1.60E-02 | 2.29E-02 | 1.00E+00 |
| 325.98733 | 50.17  | 16.57 | 17.15 | 17.61 | 17.17 | 5.63E-08 | 3.00E-03 | 7.76E-09 | 2.54E-03 | 3.73E-02 | 9.99E-01 | 6.29E-02 |
| 326.01179 | 80.66  | 18.03 | 16.79 | 15.73 | 18.25 | 9.52E-16 | 2.36E-04 | 1.50E-12 | 8.89E-01 | 3.63E-03 | 3.33E-05 | 3.52E-13 |
| 326.0468  | 169.67 | 14.04 | 19.45 | 19.09 | 17.74 | 1.12E-37 | 3.65E-14 | 3.65E-14 | 7.34E-14 | 7.82E-01 | 1.17E-04 | 3.38E-03 |
| 326.05655 | 237.55 | 22.31 | 23.22 | 24.68 | 22.93 | 5.95E-11 | 2.71E-02 | 1.33E-11 | 2.38E-01 | 8.08E-05 | 8.39E-01 | 3.00E-06 |
| 326.06368 | 142.72 | 14.93 | 16.48 | 16.86 | 15.68 | 4.16E-13 | 1.84E-08 | 1.51E-12 | 1.95E-02 | 4.32E-01 | 1.60E-02 | 6.56E-05 |
| 326.08511 | 83.44  | 17.92 | 19.79 | 19.42 | 20.16 | 4.91E-21 | 7.80E-14 | 1.28E-10 | 7.32E-14 | 3.32E-01 | 3.65E-01 | 6.38E-03 |
| 326.09587 | 89.21  | 15.01 | 15.91 | 15.68 | 15.13 | 1.19E-05 | 4.53E-05 | 4.15E-03 | 9.23E-01 | 6.48E-01 | 1.43E-03 | 4.71E-02 |
| 326.10965 | 99.13  | 19.28 | 18.78 | 19.12 | 19.01 | 8.52E-02 | 5.31E-02 | 8.45E-01 | 5.46E-01 | 3.20E-01 | 6.68E-01 | 9.53E-01 |
| 326.16391 | 152.93 | 17.11 | 20.24 | 19.58 | 19.36 | 1.20E-28 | 3.67E-14 | 7.38E-14 | 7.36E-14 | 4.37E-02 | 4.52E-03 | 8.32E-01 |
| 326.17113 | 56.67  | 15.59 | 15.79 | 15.93 | 16.41 | 3.74E-02 | 8.76E-01 | 5.89E-01 | 2.11E-02 | 9.62E-01 | 1.55E-01 | 3.55E-01 |
| 326.19601 | 23.67  | 14.30 | 11.92 | 14.49 | 11.32 | 8.46E-09 | 2.56E-04 | 9.86E-01 | 4.60E-06 | 9.89E-05 | 7.53E-01 | 1.71E-06 |
| 326.20715 | 31.12  | 17.25 | 17.11 | 16.88 | 16.78 | 2.07E-01 | 9.32E-01 | 3.85E-01 | 2.19E-01 | 7.75E-01 | 5.62E-01 | 9.81E-01 |
| 326.21848 | 22.98  | 15.11 | 15.97 | 13.67 | 16.09 | 7.28E-13 | 3.44E-02 | 4.39E-05 | 1.45E-02 | 9.90E-11 | 9.84E-01 | 3.26E-11 |
| 326.26893 | 225.36 | 16.78 | 11.61 | 11.30 | 12.71 | 1.72E-22 | 7.47E-14 | 7.25E-14 | 1.88E-11 | 9.45E-01 | 2.16E-01 | 6.34E-02 |
| 326.29549 | 216.73 | 17.43 | 14.93 | 14.87 | 15.20 | 2.10E-28 | 5.34E-14 | 4.50E-14 | 7.23E-14 | 9.95E-01 | 6.58E-01 | 5.03E-01 |
| 326.30493 | 23.77  | 18.42 | 15.81 | 16.81 | 17.10 | 9.71E-36 | 3.65E-14 | 7.41E-14 | 2.04E-12 | 8.28E-08 | 2.15E-11 | 3.41E-01 |
| 326.30523 | 160.24 | 18.16 | 15.94 | 15.76 | 16.17 | 1.41E-28 | 6.01E-14 | 3.92E-14 | 7.54E-14 | 8.34E-01 | 6.88E-01 | 2.17E-01 |
| 326.37777 | 22.53  | 17.23 | 12.42 | 13.70 | 15.31 | 1.44E-24 | 4.23E-14 | 8.23E-14 | 5.23E-05 | 1.41E-02 | 1.53E-09 | 1.43E-03 |
| 326.55827 | 238.18 | 20.33 | 22.06 | 22.94 | 21.60 | 5.10E-17 | 7.92E-09 | 7.43E-14 | 5.38E-05 | 9.95E-03 | 3.93E-01 | 3.15E-05 |
| 326.66004 | 29.07  | 15.90 | 17.74 | 19.25 | 18.56 | 4.11E-29 | 9.57E-11 | 3.65E-14 | 7.43E-14 | 1.96E-07 | 1.58E-02 | 5.35E-02 |
| 326.6784  | 28.88  | 15.85 | 14.81 | 17.62 | 16.78 | 1.46E-14 | 7.59E-03 | 4.34E-07 | 2.59E-02 | 8.79E-14 | 1.36E-07 | 6.42E-02 |

|           |        |       |       |       |       |          |          |          |          |          |          |          |
|-----------|--------|-------|-------|-------|-------|----------|----------|----------|----------|----------|----------|----------|
| 326.69649 | 27.57  | 16.19 | 20.34 | 14.96 | 16.21 | 2.30E-76 | 3.65E-14 | 1.05E-09 | 9.99E-01 | 3.65E-14 | 3.65E-14 | 4.30E-09 |
| 326.76581 | 43.57  | 13.89 | 14.23 | 13.95 | 14.73 | 1.11E-02 | 5.47E-01 | 9.96E-01 | 1.10E-02 | 7.05E-01 | 2.91E-01 | 2.57E-02 |
| 326.79758 | 44.82  | 14.92 | 14.59 | 14.26 | 14.47 | 3.15E-03 | 2.64E-01 | 1.37E-03 | 7.17E-02 | 2.63E-01 | 9.17E-01 | 6.71E-01 |
| 326.80488 | 48.5   | 15.98 | 15.76 | 15.59 | 16.18 | 1.17E-01 | 8.00E-01 | 3.70E-01 | 8.59E-01 | 9.05E-01 | 3.67E-01 | 1.01E-01 |
| 326.81488 | 44.8   | 15.64 | 16.10 | 17.59 | 16.03 | 1.14E-16 | 1.46E-01 | 7.49E-14 | 2.84E-01 | 5.26E-10 | 9.92E-01 | 2.65E-10 |
| 326.824   | 46.91  | 15.64 | 14.33 | 15.18 | 15.04 | 3.14E-06 | 5.67E-07 | 2.06E-01 | 6.59E-02 | 3.21E-03 | 2.75E-02 | 9.40E-01 |
| 326.8421  | 44.41  | 16.92 | 17.66 | 18.22 | 17.41 | 1.16E-13 | 1.75E-05 | 8.92E-14 | 1.25E-02 | 2.43E-03 | 4.11E-01 | 5.62E-06 |
| 326.84967 | 47.91  | 14.99 | 16.78 | 17.04 | 16.48 | 6.95E-26 | 7.43E-14 | 4.41E-14 | 2.62E-13 | 4.96E-01 | 3.72E-01 | 1.58E-02 |
| 326.88498 | 45     | 19.06 | 18.17 | 18.48 | 18.00 | 3.07E-17 | 1.38E-12 | 3.92E-06 | 7.42E-14 | 3.94E-02 | 5.18E-01 | 5.03E-04 |
| 326.94819 | 52.94  | 19.66 | 17.38 | 18.49 | 17.44 | 1.19E-25 | 5.72E-14 | 1.87E-07 | 6.89E-14 | 2.04E-06 | 9.94E-01 | 1.24E-05 |
| 326.97804 | 97.56  | 16.07 | 17.73 | 15.00 | 17.38 | 4.73E-17 | 6.00E-07 | 2.45E-03 | 2.07E-04 | 7.61E-14 | 6.84E-01 | 9.59E-12 |
| 326.99443 | 61.81  | 18.84 | 16.42 | 17.05 | 18.05 | 2.87E-53 | 3.65E-14 | 3.65E-14 | 6.45E-09 | 3.14E-06 | 3.67E-14 | 7.06E-13 |
| 327.0078  | 293    | 18.46 | 17.71 | 17.91 | 17.76 | 4.33E-02 | 5.24E-02 | 2.23E-01 | 9.32E-02 | 9.14E-01 | 9.98E-01 | 9.65E-01 |
| 327.026   | 100.8  | 16.73 | 14.84 | 14.84 | 15.03 | 9.50E-16 | 1.45E-12 | 1.00E-12 | 5.23E-10 | 1.00E+00 | 8.69E-01 | 8.71E-01 |
| 327.03586 | 83.12  | 13.63 | 16.33 | 15.40 | 15.25 | 4.30E-08 | 1.09E-08 | 2.65E-04 | 1.68E-03 | 1.55E-01 | 8.72E-02 | 9.87E-01 |
| 327.04739 | 173.61 | 14.08 | 15.59 | 15.10 | 14.79 | 1.13E-11 | 2.97E-12 | 2.27E-06 | 2.85E-03 | 7.23E-02 | 9.12E-04 | 4.44E-01 |
| 327.04839 | 57.06  | 8.18  | 13.85 | 8.85  | 11.75 | 7.32E-17 | 7.69E-14 | 7.25E-01 | 1.20E-06 | 7.54E-12 | 1.32E-02 | 1.74E-04 |
| 327.05828 | 286.73 | 17.97 | 20.01 | 20.58 | 19.31 | 2.43E-31 | 6.81E-14 | 3.65E-14 | 4.74E-10 | 1.91E-02 | 4.20E-03 | 9.13E-09 |
| 327.08636 | 79.91  | 14.13 | 16.28 | 14.01 | 16.41 | 1.73E-10 | 4.22E-06 | 9.92E-01 | 1.81E-06 | 2.03E-06 | 9.91E-01 | 8.75E-07 |
| 327.16213 | 29.65  | 16.15 | 14.45 | 17.23 | 16.99 | 2.17E-17 | 2.11E-07 | 1.79E-03 | 3.22E-02 | 7.52E-14 | 3.50E-13 | 8.72E-01 |
| 327.16494 | 126.08 | 12.70 | 15.83 | 12.61 | 13.72 | 1.56E-11 | 4.47E-10 | 9.97E-01 | 1.36E-01 | 3.67E-10 | 1.14E-04 | 9.93E-02 |
| 327.19015 | 63.8   | 14.59 | 16.33 | 16.39 | 16.31 | 8.21E-10 | 1.99E-07 | 5.70E-08 | 5.55E-07 | 9.98E-01 | 1.00E+00 | 9.96E-01 |
| 327.20061 | 25.54  | 19.42 | 18.15 | 14.41 | 15.54 | 4.22E-48 | 5.81E-05 | 3.65E-14 | 3.65E-14 | 3.65E-14 | 7.64E-14 | 9.53E-04 |
| 327.20138 | 185.79 | 15.85 | 10.70 | 15.11 | 13.72 | 2.10E-19 | 7.49E-14 | 4.70E-01 | 4.37E-04 | 1.14E-13 | 4.90E-07 | 5.17E-02 |
| 327.21673 | 22.09  | 16.68 | 17.64 | 19.23 | 18.27 | 7.33E-45 | 4.66E-10 | 3.65E-14 | 5.63E-14 | 5.41E-14 | 1.50E-04 | 2.28E-09 |
| 327.21679 | 98.82  | 15.74 | 12.56 | 10.82 | 15.22 | 1.11E-29 | 5.46E-13 | 3.72E-14 | 5.75E-01 | 1.71E-04 | 9.81E-09 | 6.96E-14 |
| 327.22614 | 22.6   | 16.14 | 18.76 | 15.88 | 17.96 | 1.54E-24 | 7.38E-14 | 7.76E-01 | 2.52E-09 | 7.25E-14 | 2.86E-02 | 3.24E-11 |
| 327.23145 | 24.11  | 19.36 | 16.96 | 18.68 | 19.09 | 1.33E-22 | 6.05E-14 | 1.06E-02 | 6.30E-01 | 4.06E-12 | 7.38E-14 | 2.83E-01 |
| 327.23181 | 175.63 | 17.16 | 15.62 | 16.13 | 15.14 | 1.34E-11 | 1.52E-07 | 7.59E-04 | 1.63E-11 | 2.40E-01 | 3.15E-01 | 2.46E-03 |
| 327.25291 | 158.25 | 20.24 | 19.18 | 19.69 | 19.41 | 8.65E-04 | 5.67E-04 | 1.58E-01 | 1.43E-02 | 2.54E-01 | 8.51E-01 | 7.56E-01 |
| 327.28921 | 187.57 | 17.15 | 12.94 | 14.17 | 13.64 | 6.58E-19 | 7.45E-14 | 3.08E-10 | 1.19E-12 | 3.25E-02 | 4.27E-01 | 6.60E-01 |
| 327.30844 | 23.1   | 16.12 | 10.62 | 12.24 | 13.08 | 2.90E-28 | 3.65E-14 | 7.29E-14 | 1.26E-10 | 1.12E-03 | 5.17E-07 | 2.35E-01 |
| 327.55997 | 292.64 | 16.00 | 17.13 | 17.44 | 16.39 | 1.67E-07 | 1.49E-04 | 4.63E-07 | 4.66E-01 | 6.42E-01 | 4.24E-02 | 9.81E-04 |
| 327.59622 | 255.82 | 16.28 | 21.56 | 20.21 | 19.70 | 1.47E-24 | 4.16E-14 | 7.61E-14 | 1.54E-11 | 1.95E-02 | 7.06E-04 | 6.99E-01 |
| 327.72782 | 22.49  | 15.71 | 17.54 | 16.09 | 17.04 | 1.46E-09 | 7.87E-09 | 5.50E-01 | 6.49E-05 | 1.07E-05 | 3.69E-01 | 9.96E-03 |
| 327.87961 | 50.18  | 19.31 | 19.61 | 20.11 | 19.09 | 8.22E-05 | 4.94E-01 | 1.43E-03 | 7.66E-01 | 1.21E-01 | 1.07E-01 | 7.70E-05 |
| 327.94846 | 23.75  | 15.42 | 16.18 | 14.82 | 16.30 | 8.51E-25 | 1.56E-07 | 4.39E-05 | 2.71E-09 | 7.31E-14 | 8.18E-01 | 6.61E-14 |
| 327.96501 | 37.87  | 14.68 | 15.35 | 13.64 | 15.40 | 7.16E-07 | 1.77E-01 | 9.90E-03 | 1.45E-01 | 5.77E-06 | 9.99E-01 | 5.17E-06 |
| 327.98884 | 56.19  | 16.52 | 14.66 | 13.74 | 14.61 | 3.10E-04 | 2.41E-02 | 1.38E-04 | 2.36E-02 | 5.07E-01 | 1.00E+00 | 5.79E-01 |
| 328.01286 | 55.11  | 16.22 | 14.62 | 14.83 | 14.61 | 1.35E-03 | 4.39E-03 | 1.59E-02 | 5.46E-03 | 9.75E-01 | 1.00E+00 | 9.73E-01 |
| 328.03027 | 96.02  | 15.60 | 17.19 | 16.24 | 17.10 | 2.77E-06 | 1.39E-05 | 2.06E-01 | 8.07E-05 | 2.54E-02 | 9.93E-01 | 6.30E-02 |
| 328.05282 | 231.7  | 15.36 | 17.88 | 19.27 | 17.22 | 1.25E-16 | 2.65E-08 | 7.51E-14 | 1.05E-04 | 6.80E-03 | 4.27E-01 | 2.44E-05 |
| 328.05357 | 81.68  | 17.80 | 21.39 | 21.35 | 20.62 | 4.31E-31 | 3.74E-14 | 3.74E-14 | 7.48E-14 | 9.99E-01 | 6.05E-02 | 8.22E-02 |
| 328.06216 | 50.82  | 18.68 | 19.53 | 20.15 | 19.68 | 4.12E-12 | 6.62E-05 | 8.85E-13 | 3.10E-06 | 7.32E-03 | 8.69E-01 | 8.14E-02 |
| 328.08251 | 81.06  | 15.33 | 16.49 | 15.94 | 17.04 | 1.62E-07 | 3.56E-04 | 1.28E-01 | 9.81E-08 | 2.45E-01 | 2.65E-01 | 1.77E-03 |
| 328.09038 | 63.05  | 16.54 | 17.33 | 17.16 | 17.84 | 2.87E-07 | 1.42E-03 | 1.70E-02 | 5.87E-08 | 8.74E-01 | 1.10E-01 | 1.49E-02 |
| 328.09829 | 244.03 | 11.11 | 18.70 | 18.17 | 17.27 | 1.56E-50 | 3.65E-14 | 3.65E-14 | 3.65E-14 | 6.05E-01 | 8.24E-03 | 1.80E-01 |
| 328.11483 | 66.76  | 16.62 | 16.73 | 16.69 | 16.39 | 4.93E-01 | 9.62E-01 | 9.88E-01 | 7.42E-01 | 9.99E-01 | 4.76E-01 | 5.65E-01 |
| 328.12503 | 113.14 | 15.90 | 17.57 | 17.46 | 17.10 | 1.70E-33 | 3.65E-14 | 3.67E-14 | 7.38E-14 | 7.99E-01 | 2.44E-03 | 3.59E-02 |
| 328.2195  | 22.81  | 15.12 | 11.88 | 15.94 | 13.93 | 1.14E-39 | 3.65E-14 | 4.66E-03 | 2.66E-05 | 3.65E-14 | 7.11E-13 | 1.62E-12 |
| 328.2337  | 24.65  | 18.80 | 20.82 | 19.52 | 20.64 | 3.06E-23 | 7.14E-14 | 1.27E-03 | 7.43E-14 | 2.43E-09 | 8.02E-01 | 7.10E-07 |
| 328.24782 | 23.52  | 18.18 | 17.17 | 17.30 | 17.96 | 2.01E-03 | 5.32E-03 | 1.84E-02 | 8.86E-01 | 9.76E-01 | 7.03E-02 | 1.66E-01 |
| 328.25603 | 279.29 | 18.41 | 16.11 | 16.20 | 15.84 | 2.96E-17 | 1.70E-12 | 7.41E-12 | 9.58E-14 | 9.90E-01 | 8.23E-01 | 6.45E-01 |
| 328.32064 | 23.8   | 18.75 | 16.69 | 16.92 | 18.34 | 1.35E-26 | 6.27E-14 | 7.34E-14 | 1.50E-01 | 6.11E-01 | 1.87E-13 | 1.12E-10 |
| 328.59429 | 151.6  | 12.03 | 18.18 | 17.07 | 16.90 | 3.66E-39 | 3.65E-14 | 3.67E-14 | 3.94E-14 | 3.64E-02 | 1.43E-02 | 9.76E-01 |
| 328.59431 | 257.97 | 12.10 | 16.12 | 15.24 | 15.31 | 9.19E-19 | 7.41E-14 | 7.67E-12 | 1.32E-11 | 1.71E-01 | 2.65E-01 | 9.98E-01 |
| 328.59973 | 150.22 | 10.46 | 16.20 | 15.00 | 15.28 | 2.04E-28 | 3.74E-14 | 7.43E-14 | 7.41E-14 | 6.40E-02 | 2.49E-01 | 9.45E-01 |
| 328.66518 | 26.99  | 15.84 | 18.96 | 13.98 | 14.03 | 2.38E-83 | 3.65E-14 | 5.14E-14 | 6.81E-14 | 3.65E-14 | 3.65E-14 | 9.95E-01 |
| 328.67088 | 30.77  | 13.15 | 9.82  | 15.22 | 12.92 | 6.34E-19 | 1.78E-09 | 3.03E-04 | 9.70E-01 | 7.12E-14 | 1.35E-07 | 1.32E-04 |
| 328.70232 | 56.12  | 15.51 | 12.91 | 15.95 | 14.18 | 1.33E-12 | 2.94E-09 | 6.73E-01 | 7.41E-03 | 1.27E-11 | 1.55E-02 | 1.97E-04 |
| 328.73496 | 27.59  | 17.14 | 19.61 | 17.95 | 19.18 | 1.55E-25 | 4.79E-14 | 1.16E-03 | 7.41E-14 | 9.49E-12 | 2.26E-01 | 1.10E-06 |
| 328.74815 | 48.02  | 17.51 | 17.96 | 18.11 | 17.62 | 3.02E-09 | 4.09E-05 | 2.40E-08 | 6.75E-01 | 4.81E-01 | 7.01E-03 | 2.90E-05 |
| 328.75614 | 51.1   | 16.72 | 16.48 | 16.15 | 16.68 | 3.64E-02 | 6.62E-01 | 3.46E-02 | 9.98E-01 | 4.28E-01 | 8.04E-01 | 8.20E-02 |
| 328.81246 | 44.76  | 13.01 | 13.49 | 16.51 | 14.17 | 2.12E-12 | 7.27E-01 | 3.46E-12 | 7.02E-02 | 5.57E-09 | 5.02E-01 | 1.50E-05 |
| 328.83992 | 44.46  | 14.55 | 14.28 | 15.07 | 14.47 | 1.85E-02 | 7.12E-01 | 1.51E-01 | 9.91E-01 | 1.21E-02 | 8.92E-01 | 1.03E-01 |
| 328.84664 | 49.22  | 15.25 | 15.52 | 15.28 | 15.62 | 5.25E-01 | 7.73E-01 | 9.99E-01 | 5.81E-01 | 8.45E-01 | 9.88E-01 | 6.70E-01 |
| 328.8829  | 49.05  | 18.61 | 17.56 | 18.37 | 17.43 | 1.43E-17 | 8.18E-12 | 3.10E-01 | 1.70E-13 | 2.67E-07 | 8.13E-01 | 4.87E-09 |
| 328.89066 | 308.74 | 14.47 | 14.08 | 11.89 | 12.72 | 3.17E-32 | 1.99E-01 | 3.65E-14 | 8.07E-14 | 6.18E-14 | 2.47E-09 | 4.30E-04 |

|           |        |       |       |       |       |          |          |          |          |          |          |          |
|-----------|--------|-------|-------|-------|-------|----------|----------|----------|----------|----------|----------|----------|
| 328.91626 | 38.95  | 17.77 | 15.36 | 15.76 | 15.84 | 4.88E-18 | 7.52E-14 | 2.45E-12 | 6.62E-11 | 4.30E-01 | 3.06E-01 | 9.93E-01 |
| 328.93465 | 25.29  | 14.80 | 16.29 | 16.03 | 16.22 | 4.01E-12 | 2.09E-10 | 1.32E-07 | 3.85E-09 | 6.31E-01 | 9.88E-01 | 8.35E-01 |
| 328.94727 | 33.02  | 17.05 | 13.02 | 14.21 | 13.18 | 1.69E-17 | 7.76E-14 | 1.23E-08 | 1.76E-13 | 5.65E-02 | 9.87E-01 | 1.44E-01 |
| 328.95837 | 115.78 | 15.85 | 16.71 | 18.35 | 17.70 | 7.39E-14 | 2.96E-02 | 2.13E-13 | 1.05E-07 | 2.83E-06 | 1.39E-02 | 1.93E-01 |
| 328.96913 | 26.67  | 15.21 | 16.73 | 14.82 | 16.14 | 7.66E-10 | 2.28E-06 | 5.11E-01 | 1.09E-02 | 4.19E-09 | 2.23E-01 | 1.19E-04 |
| 328.99423 | 273.11 | 19.73 | 20.65 | 21.40 | 20.25 | 1.41E-24 | 2.48E-09 | 3.87E-14 | 2.22E-03 | 1.67E-06 | 3.81E-02 | 9.38E-13 |
| 329.00435 | 286.96 | 18.73 | 18.32 | 18.82 | 18.46 | 9.87E-02 | 2.41E-01 | 9.74E-01 | 6.29E-01 | 1.14E-01 | 9.28E-01 | 3.95E-01 |
| 329.02724 | 55.8   | 20.10 | 19.42 | 20.34 | 20.30 | 5.94E-07 | 4.59E-04 | 5.14E-01 | 6.74E-01 | 2.03E-06 | 1.15E-05 | 9.97E-01 |
| 329.03819 | 40.58  | 15.83 | 18.36 | 18.23 | 17.45 | 1.93E-45 | 3.65E-14 | 3.65E-14 | 7.03E-14 | 8.35E-01 | 2.67E-07 | 1.11E-05 |
| 329.05588 | 85.32  | 15.71 | 17.73 | 17.68 | 17.37 | 1.52E-34 | 3.65E-14 | 3.65E-14 | 6.87E-14 | 9.88E-01 | 1.06E-01 | 2.01E-01 |
| 329.06702 | 65.34  | 16.33 | 16.33 | 16.94 | 17.64 | 1.66E-07 | 1.00E+00 | 4.52E-02 | 9.30E-07 | 5.87E-02 | 2.24E-06 | 2.68E-02 |
| 329.08377 | 205.42 | 8.41  | 7.23  | 14.88 | 17.72 | 1.37E-95 | 8.60E-04 | 3.65E-14 | 3.65E-14 | 3.65E-14 | 3.65E-14 | 7.69E-14 |
| 329.08567 | 112.26 | 9.59  | 14.58 | 12.41 | 14.22 | 1.90E-29 | 3.72E-14 | 9.12E-11 | 5.16E-14 | 1.75E-06 | 8.21E-01 | 1.59E-04 |
| 329.09617 | 150.19 | 10.40 | 15.27 | 14.01 | 14.05 | 1.47E-23 | 5.14E-14 | 1.04E-13 | 1.82E-13 | 2.41E-02 | 3.98E-02 | 1.00E+00 |
| 329.21631 | 24.47  | 15.03 | 13.40 | 15.90 | 13.90 | 2.07E-11 | 2.16E-05 | 5.37E-02 | 8.54E-03 | 9.25E-11 | 5.09E-01 | 5.04E-07 |
| 329.23392 | 23.29  | 11.59 | 8.91  | 13.09 | 8.65  | 2.81E-08 | 3.83E-03 | 2.18E-01 | 1.68E-03 | 2.35E-06 | 9.89E-01 | 9.46E-07 |
| 329.24709 | 24.38  | 21.41 | 19.06 | 20.39 | 20.42 | 1.64E-34 | 3.65E-14 | 6.56E-10 | 5.63E-09 | 8.20E-14 | 9.39E-14 | 9.99E-01 |
| 329.26857 | 24.96  | 16.71 | 10.28 | 12.98 | 11.34 | 8.75E-23 | 6.03E-14 | 5.03E-09 | 7.63E-14 | 6.60E-05 | 3.19E-01 | 4.17E-02 |
| 329.26858 | 164.67 | 17.52 | 13.24 | 14.94 | 14.11 | 5.55E-27 | 3.72E-14 | 7.31E-12 | 7.56E-14 | 1.73E-05 | 8.27E-02 | 1.07E-01 |
| 329.32401 | 23.44  | 16.52 | 8.78  | 11.40 | 14.20 | 4.47E-33 | 3.65E-14 | 7.49E-14 | 2.44E-04 | 2.45E-05 | 7.44E-14 | 9.84E-06 |
| 329.53979 | 183.99 | 10.54 | 15.61 | 14.69 | 13.69 | 4.76E-28 | 3.70E-14 | 7.16E-14 | 5.50E-12 | 1.18E-01 | 6.96E-05 | 9.12E-02 |
| 329.74346 | 22.44  | 16.41 | 18.42 | 17.14 | 18.24 | 6.69E-15 | 6.33E-13 | 2.03E-02 | 1.28E-10 | 8.96E-06 | 9.09E-01 | 2.76E-04 |
| 329.87689 | 50     | 18.24 | 18.34 | 18.85 | 17.75 | 4.64E-04 | 9.77E-01 | 5.28E-02 | 2.04E-01 | 1.60E-01 | 1.04E-01 | 1.24E-04 |
| 329.97182 | 40.23  | 15.37 | 14.52 | 14.41 | 14.76 | 2.06E-02 | 5.47E-02 | 2.10E-02 | 2.88E-01 | 9.89E-01 | 9.01E-01 | 7.47E-01 |
| 330.00953 | 76.41  | 16.35 | 14.75 | 15.68 | 15.58 | 6.54E-03 | 2.29E-03 | 4.30E-01 | 3.36E-01 | 1.77E-01 | 2.95E-01 | 9.97E-01 |
| 330.02864 | 48.22  | 16.56 | 14.58 | 15.65 | 16.43 | 2.04E-07 | 4.15E-07 | 5.22E-02 | 9.85E-01 | 1.77E-02 | 9.63E-06 | 1.63E-01 |
| 330.03974 | 36.37  | 17.73 | 12.39 | 12.50 | 12.76 | 1.80E-57 | 3.65E-14 | 3.65E-14 | 3.65E-14 | 9.81E-01 | 5.78E-01 | 7.95E-01 |
| 330.05192 | 84.73  | 15.65 | 18.31 | 18.22 | 17.87 | 6.04E-54 | 3.65E-14 | 3.65E-14 | 3.65E-14 | 9.30E-01 | 2.01E-02 | 8.98E-02 |
| 330.05988 | 281.92 | 16.07 | 18.89 | 18.52 | 17.74 | 1.08E-25 | 4.43E-14 | 7.21E-14 | 1.22E-09 | 4.46E-01 | 6.92E-05 | 1.28E-02 |
| 330.07306 | 74.71  | 23.58 | 24.62 | 24.38 | 23.54 | 4.96E-06 | 1.39E-04 | 5.03E-03 | 9.99E-01 | 7.69E-01 | 1.96E-04 | 5.60E-03 |
| 330.09082 | 105.65 | 14.69 | 17.55 | 14.26 | 16.24 | 1.13E-22 | 7.33E-14 | 4.91E-01 | 9.74E-06 | 7.18E-14 | 4.60E-04 | 2.15E-08 |
| 330.22714 | 25.1   | 18.69 | 18.85 | 18.44 | 18.13 | 4.05E-06 | 6.52E-01 | 2.06E-01 | 2.88E-04 | 1.44E-02 | 4.16E-06 | 1.27E-01 |
| 330.24867 | 23.46  | 19.56 | 18.39 | 18.47 | 19.34 | 4.84E-14 | 9.17E-11 | 9.51E-10 | 5.69E-01 | 9.68E-01 | 7.29E-07 | 4.98E-06 |
| 330.26355 | 22.73  | 16.44 | 13.14 | 13.41 | 14.48 | 2.87E-22 | 7.18E-14 | 7.47E-14 | 5.07E-08 | 8.49E-01 | 5.91E-04 | 8.55E-03 |
| 330.62842 | 29.92  | 15.80 | 14.82 | 17.14 | 16.49 | 5.39E-12 | 5.46E-03 | 4.28E-05 | 1.05E-01 | 2.74E-12 | 1.22E-06 | 1.55E-01 |
| 330.68086 | 28.17  | 14.94 | 17.20 | 16.05 | 14.19 | 2.88E-10 | 1.00E-06 | 3.96E-02 | 3.06E-01 | 3.86E-02 | 6.14E-10 | 2.03E-04 |
| 330.74539 | 48.64  | 17.90 | 18.24 | 18.41 | 18.03 | 1.02E-06 | 1.96E-03 | 8.95E-07 | 4.97E-01 | 3.25E-01 | 1.66E-01 | 1.30E-03 |
| 330.75294 | 47.96  | 17.29 | 17.57 | 17.18 | 17.96 | 3.27E-02 | 7.12E-01 | 9.77E-01 | 7.41E-02 | 4.79E-01 | 5.30E-01 | 3.13E-02 |
| 330.88121 | 44.91  | 13.71 | 13.27 | 14.82 | 13.86 | 6.61E-03 | 7.45E-01 | 5.31E-02 | 9.87E-01 | 3.54E-03 | 5.79E-01 | 1.59E-01 |
| 330.91369 | 48.95  | 15.54 | 15.01 | 15.44 | 15.34 | 5.61E-01 | 5.09E-01 | 9.93E-01 | 9.54E-01 | 6.96E-01 | 8.51E-01 | 9.94E-01 |
| 330.92712 | 128.7  | 15.66 | 16.52 | 15.28 | 15.52 | 3.80E-02 | 1.91E-01 | 8.19E-01 | 9.90E-01 | 2.85E-02 | 1.30E-01 | 9.54E-01 |
| 330.92871 | 252.13 | 14.07 | 17.26 | 17.14 | 16.08 | 9.49E-22 | 7.65E-14 | 7.36E-14 | 2.30E-08 | 9.83E-01 | 3.39E-03 | 1.01E-02 |
| 331.00214 | 175.23 | 17.05 | 14.99 | 15.07 | 15.82 | 5.45E-28 | 4.16E-14 | 4.90E-14 | 5.58E-10 | 9.65E-01 | 6.31E-05 | 3.59E-04 |
| 331.02366 | 47.99  | 16.62 | 14.37 | 14.93 | 15.77 | 2.47E-10 | 3.24E-10 | 2.44E-06 | 5.55E-02 | 3.33E-01 | 4.15E-04 | 7.35E-02 |
| 331.05747 | 86.31  | 15.87 | 18.40 | 17.84 | 17.42 | 2.80E-30 | 3.65E-14 | 6.98E-14 | 5.38E-13 | 2.03E-02 | 1.03E-05 | 1.53E-01 |
| 331.07041 | 76.07  | 17.67 | 18.96 | 19.30 | 18.07 | 4.71E-13 | 8.99E-08 | 9.27E-12 | 2.97E-01 | 4.31E-01 | 8.85E-04 | 1.25E-06 |
| 331.07644 | 65.68  | 20.32 | 21.25 | 21.08 | 20.26 | 3.61E-06 | 1.85E-04 | 3.45E-03 | 9.94E-01 | 8.59E-01 | 1.70E-04 | 2.78E-03 |
| 331.09266 | 68.98  | 17.93 | 18.74 | 18.28 | 18.67 | 4.77E-03 | 7.17E-03 | 4.95E-01 | 1.99E-02 | 2.69E-01 | 9.95E-01 | 4.22E-01 |
| 331.1113  | 102.42 | 15.88 | 17.65 | 15.27 | 17.10 | 6.41E-21 | 4.74E-12 | 4.58E-02 | 4.16E-06 | 7.32E-14 | 1.17E-01 | 1.12E-11 |
| 331.16689 | 72.71  | 15.19 | 15.23 | 16.13 | 15.86 | 1.09E-02 | 1.00E+00 | 2.32E-02 | 1.97E-01 | 4.07E-02 | 2.67E-01 | 8.69E-01 |
| 331.17641 | 76.77  | 15.94 | 16.86 | 17.19 | 14.53 | 5.41E-13 | 2.76E-02 | 8.26E-04 | 2.33E-04 | 7.50E-01 | 9.40E-10 | 2.10E-12 |
| 331.19409 | 23.78  | 14.73 | 17.01 | 12.50 | 17.84 | 6.37E-48 | 5.46E-13 | 7.05E-13 | 6.81E-14 | 3.65E-14 | 3.00E-02 | 3.65E-14 |
| 331.20904 | 86.21  | 16.52 | 14.34 | 15.43 | 14.86 | 4.51E-10 | 2.89E-10 | 3.18E-03 | 3.65E-06 | 4.81E-03 | 4.06E-01 | 3.14E-01 |
| 331.22669 | 216.07 | 16.61 | 11.90 | 12.50 | 12.32 | 2.85E-17 | 8.40E-14 | 6.24E-12 | 4.29E-12 | 7.09E-01 | 8.90E-01 | 9.89E-01 |
| 331.23024 | 27.68  | 14.07 | 14.70 | 14.38 | 13.73 | 7.76E-02 | 3.08E-01 | 8.30E-01 | 7.97E-01 | 8.19E-01 | 5.88E-02 | 3.28E-01 |
| 331.25047 | 24.67  | 16.16 | 17.12 | 16.83 | 15.15 | 4.24E-10 | 3.55E-03 | 6.97E-02 | 2.67E-03 | 7.46E-01 | 9.71E-10 | 1.47E-07 |
| 331.26265 | 23.77  | 20.55 | 18.33 | 19.32 | 19.27 | 2.39E-28 | 3.65E-14 | 6.58E-12 | 5.98E-12 | 9.88E-08 | 1.03E-06 | 9.93E-01 |
| 331.26324 | 166.62 | 18.46 | 16.25 | 17.10 | 16.70 | 1.33E-20 | 7.16E-14 | 3.67E-09 | 3.20E-13 | 7.02E-04 | 1.91E-01 | 2.77E-01 |
| 331.28384 | 23.97  | 18.68 | 14.82 | 15.45 | 15.16 | 1.79E-50 | 3.65E-14 | 3.65E-14 | 3.65E-14 | 2.19E-02 | 4.38E-01 | 5.61E-01 |
| 331.28398 | 284.04 | 20.79 | 19.53 | 19.24 | 18.97 | 7.94E-09 | 1.62E-04 | 1.31E-06 | 3.42E-08 | 7.53E-01 | 2.60E-01 | 8.15E-01 |
| 331.52415 | 284.48 | 8.30  | 16.51 | 16.74 | 13.53 | 2.04E-38 | 3.65E-14 | 3.65E-14 | 7.76E-14 | 9.79E-01 | 1.36E-05 | 1.84E-06 |
| 331.59826 | 97.91  | 18.27 | 13.16 | 14.15 | 13.65 | 1.81E-35 | 3.65E-14 | 4.87E-14 | 3.74E-14 | 4.36E-02 | 5.84E-01 | 5.66E-01 |
| 331.63634 | 29.45  | 16.19 | 18.83 | 20.31 | 19.30 | 1.39E-68 | 3.65E-14 | 3.65E-14 | 3.65E-14 | 7.41E-14 | 3.27E-02 | 3.86E-08 |
| 331.87546 | 38.43  | 14.99 | 14.20 | 15.10 | 15.24 | 8.88E-02 | 2.44E-01 | 9.93E-01 | 9.37E-01 | 1.62E-01 | 9.39E-02 | 9.89E-01 |
| 331.92568 | 46.18  | 17.20 | 15.09 | 16.46 | 15.21 | 1.37E-13 | 1.72E-11 | 4.70E-02 | 6.17E-10 | 2.76E-05 | 9.77E-01 | 2.53E-04 |
| 331.99627 | 258.6  | 16.88 | 16.09 | 14.15 | 15.07 | 1.91E-10 | 1.84E-01 | 1.60E-10 | 6.55E-05 | 1.58E-05 | 7.06E-02 | 1.19E-01 |
| 332.00585 | 52.5   | 16.22 | 12.28 | 15.52 | 14.05 | 1.37E-15 | 7.78E-14 | 4.04E-01 | 2.95E-05 | 1.61E-10 | 1.47E-03 | 1.15E-02 |
| 332.03219 | 92.83  | 20.15 | 17.28 | 17.76 | 18.12 | 2.05E-30 | 3.65E-14 | 5.85E-14 | 7.41E-14 | 1.48E-01 | 1.94E-03 | 3.83E-01 |

|           |        |       |       |       |       |          |          |          |          |          |          |          |
|-----------|--------|-------|-------|-------|-------|----------|----------|----------|----------|----------|----------|----------|
| 332.04171 | 78.48  | 17.32 | 11.85 | 13.11 | 13.84 | 7.95E-27 | 3.72E-14 | 7.49E-14 | 3.43E-12 | 3.13E-02 | 1.89E-04 | 3.90E-01 |
| 332.06897 | 64.23  | 18.92 | 19.80 | 19.62 | 18.92 | 2.83E-05 | 4.09E-04 | 7.28E-03 | 1.00E+00 | 8.48E-01 | 1.03E-03 | 1.37E-02 |
| 332.07439 | 292.14 | 12.16 | 15.07 | 15.50 | 14.01 | 1.45E-08 | 2.13E-06 | 3.37E-08 | 7.30E-03 | 8.80E-01 | 2.72E-01 | 5.55E-02 |
| 332.07714 | 76.16  | 17.75 | 18.24 | 18.43 | 17.88 | 8.72E-08 | 4.04E-04 | 3.20E-07 | 7.36E-01 | 4.45E-01 | 2.54E-02 | 1.41E-04 |
| 332.09547 | 81.65  | 19.62 | 19.89 | 19.84 | 19.61 | 5.45E-02 | 1.32E-01 | 2.77E-01 | 1.00E+00 | 9.80E-01 | 1.42E-01 | 2.85E-01 |
| 332.13801 | 29.88  | 14.65 | 15.14 | 18.44 | 17.74 | 2.34E-28 | 4.58E-01 | 4.67E-14 | 7.41E-14 | 7.43E-14 | 2.24E-11 | 1.92E-01 |
| 332.16768 | 37.77  | 16.34 | 11.92 | 16.01 | 15.77 | 9.64E-31 | 3.67E-14 | 7.66E-01 | 3.72E-01 | 4.41E-14 | 6.85E-14 | 9.11E-01 |
| 332.24292 | 25.2   | 19.89 | 22.13 | 21.11 | 20.72 | 6.49E-27 | 3.65E-14 | 8.12E-11 | 3.06E-05 | 1.61E-07 | 2.36E-12 | 1.36E-01 |
| 332.26547 | 23.11  | 18.55 | 14.50 | 17.03 | 16.97 | 4.05E-38 | 3.65E-14 | 9.19E-09 | 8.13E-09 | 7.26E-14 | 7.36E-14 | 9.95E-01 |
| 332.28723 | 24.2   | 16.42 | 10.10 | 11.83 | 9.50  | 8.07E-31 | 4.10E-14 | 8.00E-14 | 3.67E-14 | 9.77E-03 | 7.11E-01 | 2.72E-04 |
| 332.28761 | 164.73 | 18.61 | 14.03 | 14.74 | 14.87 | 3.71E-37 | 3.65E-14 | 3.70E-14 | 4.32E-14 | 1.21E-01 | 5.50E-02 | 9.77E-01 |
| 332.33069 | 22.67  | 17.73 | 14.00 | 15.07 | 16.59 | 5.11E-23 | 5.81E-14 | 6.19E-13 | 6.64E-03 | 1.18E-02 | 3.86E-11 | 1.47E-04 |
| 332.51741 | 56.72  | 16.13 | 17.44 | 17.59 | 17.54 | 1.58E-05 | 6.34E-04 | 9.30E-05 | 3.25E-04 | 9.74E-01 | 9.94E-01 | 9.99E-01 |
| 332.56159 | 280.3  | 17.36 | 21.40 | 21.02 | 19.61 | 4.76E-39 | 3.65E-14 | 3.65E-14 | 1.53E-13 | 4.86E-01 | 6.87E-09 | 6.17E-06 |
| 332.58913 | 286.33 | 14.43 | 17.59 | 18.03 | 16.56 | 8.28E-37 | 3.65E-14 | 3.65E-14 | 9.27E-14 | 2.99E-01 | 5.58E-04 | 2.12E-07 |
| 332.67834 | 28.24  | 15.51 | 17.87 | 17.30 | 17.42 | 2.08E-31 | 3.65E-14 | 7.43E-14 | 6.85E-14 | 9.84E-03 | 8.62E-02 | 9.02E-01 |
| 332.74666 | 43.5   | 17.63 | 18.22 | 18.79 | 18.12 | 1.20E-08 | 5.09E-03 | 1.22E-09 | 3.20E-02 | 9.29E-03 | 9.59E-01 | 2.21E-03 |
| 332.83169 | 46.66  | 14.83 | 14.72 | 14.88 | 15.16 | 2.67E-01 | 9.59E-01 | 9.95E-01 | 4.30E-01 | 8.86E-01 | 2.14E-01 | 5.96E-01 |
| 332.8397  | 48.62  | 16.53 | 17.21 | 17.07 | 17.47 | 2.14E-05 | 2.09E-03 | 1.99E-02 | 1.16E-05 | 8.95E-01 | 5.49E-01 | 1.83E-01 |
| 332.85752 | 42.44  | 16.41 | 19.16 | 18.88 | 19.18 | 2.69E-50 | 3.65E-14 | 3.65E-14 | 3.65E-14 | 3.37E-01 | 9.99E-01 | 2.82E-01 |
| 332.86559 | 47.93  | 15.25 | 15.42 | 15.60 | 15.37 | 6.32E-01 | 9.25E-01 | 5.54E-01 | 9.69E-01 | 9.11E-01 | 9.99E-01 | 8.55E-01 |
| 332.87526 | 284.51 | 14.62 | 17.18 | 16.45 | 15.61 | 1.26E-13 | 1.85E-13 | 7.65E-08 | 1.14E-02 | 1.01E-01 | 2.22E-05 | 5.67E-02 |
| 332.88477 | 295.46 | 18.00 | 17.52 | 17.26 | 17.75 | 1.91E-01 | 5.26E-01 | 1.47E-01 | 9.01E-01 | 8.84E-01 | 9.27E-01 | 5.41E-01 |
| 332.91242 | 48.24  | 15.61 | 17.07 | 18.32 | 17.47 | 1.49E-29 | 2.88E-11 | 3.65E-14 | 7.41E-14 | 3.45E-08 | 2.50E-01 | 4.26E-04 |
| 332.92734 | 35.27  | 17.91 | 15.34 | 14.91 | 15.66 | 6.23E-22 | 7.35E-14 | 7.18E-14 | 5.92E-12 | 4.77E-01 | 7.18E-01 | 6.83E-02 |
| 332.9549  | 48.46  | 23.94 | 24.68 | 25.00 | 24.03 | 3.37E-08 | 7.51E-04 | 3.47E-07 | 9.64E-01 | 3.63E-01 | 8.15E-03 | 1.50E-05 |
| 332.96666 | 83.85  | 17.69 | 15.22 | 13.99 | 16.73 | 5.73E-21 | 2.52E-10 | 7.05E-14 | 4.48E-02 | 5.16E-03 | 4.84E-04 | 2.86E-11 |
| 333.06108 | 290.22 | 13.99 | 18.49 | 18.42 | 17.05 | 1.64E-35 | 3.65E-14 | 3.65E-14 | 7.36E-14 | 9.97E-01 | 2.93E-04 | 5.53E-04 |
| 333.06134 | 65.7   | 16.30 | 18.87 | 19.36 | 18.50 | 2.14E-25 | 7.38E-14 | 4.39E-14 | 3.75E-13 | 2.87E-01 | 5.42E-01 | 1.24E-02 |
| 333.07174 | 71.53  | 16.81 | 16.63 | 15.89 | 16.70 | 4.94E-04 | 8.67E-01 | 5.09E-04 | 9.66E-01 | 1.13E-02 | 9.93E-01 | 5.96E-03 |
| 333.07696 | 280.12 | 15.79 | 17.91 | 18.17 | 17.46 | 9.88E-24 | 7.45E-14 | 6.05E-14 | 1.46E-11 | 6.56E-01 | 2.26E-01 | 1.34E-02 |
| 333.08554 | 52.75  | 15.56 | 14.74 | 14.72 | 16.02 | 2.31E-04 | 6.17E-02 | 4.95E-02 | 5.36E-01 | 1.00E+00 | 1.73E-03 | 1.24E-03 |
| 333.09121 | 204.08 | 10.22 | 15.28 | 12.99 | 12.40 | 1.25E-16 | 7.41E-14 | 1.29E-06 | 4.04E-04 | 1.72E-04 | 2.63E-06 | 6.97E-01 |
| 333.09828 | 69.72  | 16.17 | 15.45 | 15.01 | 15.57 | 4.76E-03 | 1.13E-01 | 1.85E-03 | 2.64E-01 | 5.43E-01 | 9.85E-01 | 3.48E-01 |
| 333.15069 | 23.98  | 17.38 | 10.43 | 10.88 | 12.86 | 3.15E-61 | 3.65E-14 | 3.65E-14 | 3.65E-14 | 5.19E-01 | 7.42E-11 | 9.17E-08 |
| 333.17639 | 37.03  | 15.33 | 14.84 | 16.52 | 16.58 | 4.14E-06 | 5.53E-01 | 8.17E-03 | 7.23E-03 | 1.01E-04 | 1.01E-04 | 9.99E-01 |
| 333.18928 | 75.63  | 13.02 | 18.01 | 17.57 | 16.73 | 3.79E-30 | 3.70E-14 | 4.59E-14 | 7.49E-14 | 7.00E-01 | 1.41E-02 | 1.89E-01 |
| 333.20578 | 29.93  | 17.36 | 14.59 | 15.29 | 16.34 | 1.46E-20 | 7.09E-14 | 1.50E-12 | 1.42E-03 | 5.69E-02 | 2.19E-08 | 1.42E-03 |
| 333.24604 | 24.32  | 17.18 | 19.44 | 18.19 | 18.03 | 1.63E-21 | 4.98E-14 | 3.97E-06 | 2.93E-04 | 2.50E-08 | 1.01E-09 | 8.60E-01 |
| 333.25299 | 22.05  | 14.63 | 15.04 | 17.69 | 16.20 | 4.09E-30 | 2.99E-01 | 3.65E-14 | 3.60E-09 | 6.07E-14 | 3.80E-05 | 4.17E-08 |
| 333.27836 | 23.54  | 19.04 | 17.75 | 18.43 | 18.54 | 4.16E-05 | 8.16E-06 | 8.65E-02 | 2.32E-01 | 5.42E-02 | 2.46E-02 | 9.81E-01 |
| 333.27882 | 161.91 | 17.68 | 15.84 | 16.41 | 16.79 | 1.41E-12 | 5.16E-13 | 4.06E-07 | 1.15E-03 | 8.00E-02 | 7.80E-04 | 3.95E-01 |
| 333.51701 | 76.9   | 16.38 | 18.13 | 18.84 | 18.57 | 1.37E-16 | 1.53E-08 | 7.72E-14 | 7.00E-12 | 7.06E-02 | 4.71E-01 | 7.88E-01 |
| 333.52378 | 80.6   | 14.05 | 16.96 | 16.37 | 13.99 | 2.10E-10 | 1.09E-07 | 2.80E-05 | 9.99E-01 | 6.48E-01 | 3.00E-07 | 5.09E-05 |
| 333.62296 | 26.66  | 15.19 | 18.39 | 15.33 | 18.74 | 6.25E-23 | 1.40E-13 | 9.83E-01 | 7.54E-14 | 2.07E-12 | 8.22E-01 | 1.03E-13 |
| 333.66804 | 28.42  | 15.64 | 16.33 | 17.30 | 17.55 | 1.84E-13 | 3.37E-02 | 9.28E-10 | 1.04E-11 | 9.74E-04 | 3.13E-05 | 7.63E-01 |
| 333.67616 | 63.49  | 13.83 | 16.53 | 16.26 | 15.46 | 2.09E-12 | 2.31E-11 | 1.15E-09 | 1.34E-04 | 8.92E-01 | 3.29E-02 | 1.65E-01 |
| 333.68615 | 28.48  | 16.39 | 19.59 | 18.81 | 18.61 | 2.28E-37 | 3.65E-14 | 4.05E-14 | 7.07E-14 | 1.77E-03 | 7.93E-05 | 7.96E-01 |
| 333.74584 | 22.28  | 14.14 | 12.59 | 13.22 | 14.46 | 2.94E-08 | 6.84E-06 | 1.57E-02 | 7.46E-01 | 1.98E-01 | 2.27E-07 | 1.01E-03 |
| 333.75452 | 22.06  | 15.00 | 14.14 | 17.12 | 15.74 | 1.03E-19 | 1.22E-02 | 4.89E-12 | 5.68E-02 | 7.21E-14 | 1.15E-06 | 2.77E-05 |
| 333.82471 | 51.25  | 19.45 | 17.89 | 18.09 | 17.73 | 1.98E-12 | 2.04E-09 | 1.38E-07 | 1.02E-10 | 8.48E-01 | 9.09E-01 | 4.59E-01 |
| 333.8521  | 72.27  | 13.59 | 15.30 | 17.12 | 17.21 | 4.71E-15 | 1.31E-03 | 1.70E-12 | 2.49E-12 | 8.20E-04 | 6.17E-04 | 9.97E-01 |
| 333.95424 | 51.4   | 16.81 | 17.05 | 17.47 | 16.17 | 8.62E-07 | 6.82E-01 | 1.28E-02 | 2.16E-02 | 2.39E-01 | 8.65E-04 | 2.01E-07 |
| 333.95979 | 52.51  | 19.35 | 19.84 | 20.22 | 19.26 | 8.03E-09 | 1.24E-02 | 5.00E-07 | 9.43E-01 | 8.89E-02 | 3.69E-03 | 1.51E-07 |
| 333.96686 | 118.66 | 14.96 | 15.24 | 13.38 | 14.70 | 5.44E-10 | 7.48E-01 | 1.11E-07 | 7.77E-01 | 1.56E-09 | 2.44E-01 | 4.62E-05 |
| 333.99675 | 73.63  | 17.23 | 17.39 | 17.52 | 17.57 | 5.35E-01 | 9.06E-01 | 6.37E-01 | 5.34E-01 | 9.62E-01 | 9.09E-01 | 9.97E-01 |
| 334.03507 | 293    | 11.43 | 18.43 | 18.46 | 15.21 | 1.09E-32 | 3.67E-14 | 3.65E-14 | 1.14E-09 | 1.00E+00 | 5.18E-07 | 3.28E-07 |
| 334.0429  | 250.18 | 18.08 | 17.64 | 17.71 | 18.58 | 1.89E-02 | 4.86E-01 | 6.18E-01 | 3.89E-01 | 9.96E-01 | 2.25E-02 | 3.77E-02 |
| 334.06022 | 62.3   | 16.79 | 15.85 | 17.47 | 16.90 | 1.11E-07 | 1.58E-03 | 4.11E-02 | 9.77E-01 | 1.82E-08 | 7.89E-04 | 1.51E-01 |
| 334.07495 | 82.46  | 19.42 | 21.61 | 21.01 | 20.85 | 1.43E-12 | 9.87E-13 | 1.58E-07 | 6.41E-06 | 1.54E-01 | 5.19E-02 | 9.49E-01 |
| 334.08826 | 292.84 | 12.26 | 16.25 | 16.47 | 14.65 | 1.50E-29 | 4.41E-14 | 3.72E-14 | 6.25E-10 | 9.30E-01 | 1.06E-04 | 6.64E-06 |
| 334.12452 | 88.41  | 16.72 | 18.02 | 18.50 | 18.81 | 3.50E-09 | 5.39E-04 | 6.09E-07 | 1.36E-08 | 4.77E-01 | 1.05E-01 | 8.04E-01 |
| 334.14121 | 51.58  | 17.69 | 15.47 | 17.55 | 19.79 | 2.10E-51 | 4.63E-14 | 8.73E-01 | 6.83E-14 | 7.07E-14 | 3.65E-14 | 5.81E-14 |
| 334.18782 | 35.86  | 13.57 | 17.63 | 16.89 | 16.83 | 4.42E-26 | 4.36E-14 | 7.43E-14 | 7.43E-14 | 1.64E-01 | 1.34E-01 | 9.98E-01 |
| 334.20671 | 35.08  | 14.86 | 18.73 | 17.04 | 18.03 | 3.07E-20 | 7.29E-14 | 1.18E-07 | 2.16E-13 | 1.18E-04 | 3.03E-01 | 6.41E-02 |
| 334.25141 | 22.57  | 13.96 | 13.90 | 13.49 | 14.37 | 2.08E-02 | 9.95E-01 | 2.71E-01 | 4.33E-01 | 4.32E-01 | 3.28E-01 | 8.94E-03 |
| 334.28184 | 23.67  | 16.86 | 13.95 | 15.25 | 15.72 | 1.92E-09 | 2.52E-10 | 7.47E-04 | 4.13E-02 | 1.52E-02 | 5.43E-04 | 7.06E-01 |
| 334.51883 | 303.52 | 15.20 | 15.41 | 15.30 | 14.20 | 2.22E-03 | 9.21E-01 | 9.91E-01 | 1.58E-02 | 9.88E-01 | 3.08E-03 | 8.17E-03 |

|           |        |       |       |       |       |           |          |          |          |          |          |          |
|-----------|--------|-------|-------|-------|-------|-----------|----------|----------|----------|----------|----------|----------|
| 334.54426 | 252.07 | 16.87 | 16.02 | 16.67 | 16.49 | 9.94E-03  | 5.39E-03 | 8.52E-01 | 4.57E-01 | 6.55E-02 | 3.11E-01 | 9.06E-01 |
| 334.57267 | 125.61 | 15.26 | 16.57 | 13.05 | 13.89 | 4.71E-30  | 5.28E-06 | 8.96E-14 | 4.24E-06 | 3.65E-14 | 7.45E-14 | 1.31E-02 |
| 334.65736 | 34.32  | 15.72 | 12.82 | 17.88 | 14.74 | 6.32E-29  | 6.28E-13 | 5.45E-08 | 4.59E-02 | 3.65E-14 | 7.89E-06 | 1.94E-13 |
| 334.69285 | 43.39  | 21.73 | 20.80 | 20.37 | 19.98 | 5.27E-10  | 1.63E-03 | 8.20E-07 | 7.32E-10 | 3.43E-01 | 1.27E-02 | 4.58E-01 |
| 334.76248 | 25.03  | 15.05 | 15.08 | 17.89 | 16.37 | 5.36E-20  | 1.00E+00 | 7.42E-14 | 1.43E-04 | 7.39E-14 | 3.58E-04 | 1.64E-05 |
| 334.8292  | 44.93  | 14.29 | 15.34 | 15.25 | 15.21 | 4.42E-15  | 9.79E-13 | 2.62E-11 | 9.03E-10 | 9.31E-01 | 7.93E-01 | 9.86E-01 |
| 334.83677 | 48.69  | 16.52 | 17.16 | 17.03 | 17.51 | 1.44E-05  | 4.52E-03 | 3.70E-02 | 4.59E-06 | 8.97E-01 | 3.12E-01 | 7.55E-02 |
| 334.8467  | 265.99 | 16.95 | 7.79  | 8.56  | 9.64  | 1.01E-40  | 3.65E-14 | 3.65E-14 | 3.92E-14 | 5.92E-01 | 1.97E-02 | 3.13E-01 |
| 334.85589 | 43.04  | 15.43 | 16.91 | 16.55 | 17.19 | 5.36E-31  | 5.10E-14 | 8.07E-14 | 3.65E-14 | 4.41E-02 | 1.75E-01 | 3.62E-05 |
| 334.86288 | 47.8   | 14.86 | 13.91 | 15.29 | 15.20 | 5.17E-03  | 9.51E-02 | 6.98E-01 | 8.46E-01 | 5.72E-03 | 1.63E-02 | 9.96E-01 |
| 334.8736  | 43.65  | 17.25 | 19.82 | 20.24 | 19.69 | 5.49E-43  | 3.65E-14 | 3.65E-14 | 3.65E-14 | 1.28E-01 | 9.09E-01 | 2.71E-02 |
| 334.88349 | 51.08  | 15.12 | 15.08 | 15.88 | 14.53 | 1.26E-02  | 9.99E-01 | 1.96E-01 | 4.46E-01 | 1.77E-01 | 5.45E-01 | 5.56E-03 |
| 334.91526 | 46.23  | 17.46 | 19.07 | 19.00 | 19.07 | 5.97E-17  | 3.77E-13 | 1.90E-12 | 1.27E-12 | 9.85E-01 | 1.00E+00 | 9.87E-01 |
| 334.95041 | 304.42 | 8.22  | 15.74 | 9.19  | 9.04  | 2.46E-31  | 3.65E-14 | 3.20E-01 | 5.03E-01 | 5.41E-14 | 5.74E-14 | 9.94E-01 |
| 334.95081 | 70.03  | 20.82 | 21.49 | 21.86 | 21.05 | 1.36E-10  | 7.49E-05 | 2.12E-10 | 4.25E-01 | 8.30E-02 | 3.33E-02 | 4.55E-06 |
| 334.96048 | 53.25  | 17.60 | 16.90 | 17.02 | 16.74 | 8.31E-08  | 1.56E-05 | 4.40E-04 | 1.71E-07 | 8.50E-01 | 7.35E-01 | 2.66E-01 |
| 335.00175 | 63.33  | 18.27 | 16.78 | 17.03 | 16.53 | 1.23E-19  | 9.51E-14 | 9.14E-11 | 7.48E-14 | 5.03E-01 | 5.73E-01 | 4.16E-02 |
| 335.04005 | 268.66 | 16.12 | 19.06 | 18.65 | 17.18 | 7.66E-29  | 3.76E-14 | 7.09E-14 | 1.58E-04 | 3.47E-01 | 2.13E-11 | 1.33E-07 |
| 335.05144 | 280.44 | 17.89 | 18.10 | 18.82 | 17.56 | 2.09E-08  | 7.17E-01 | 1.25E-05 | 3.27E-01 | 1.64E-03 | 4.34E-02 | 1.20E-08 |
| 335.06391 | 102.95 | 14.50 | 17.17 | 16.04 | 16.05 | 7.09E-11  | 8.19E-12 | 1.10E-04 | 1.79E-04 | 1.12E-02 | 1.69E-02 | 1.00E+00 |
| 335.07352 | 285.42 | 19.85 | 21.24 | 21.47 | 20.55 | 7.39E-26  | 7.49E-14 | 4.41E-14 | 1.57E-05 | 3.80E-01 | 3.59E-05 | 1.35E-08 |
| 335.07538 | 80.08  | 15.27 | 17.86 | 16.76 | 16.94 | 2.02E-05  | 5.56E-06 | 1.95E-02 | 9.42E-03 | 1.58E-01 | 3.28E-01 | 9.87E-01 |
| 335.12545 | 59.1   | 20.15 | 19.53 | 19.82 | 19.47 | 1.56E-16  | 1.03E-12 | 2.11E-04 | 9.09E-14 | 2.19E-03 | 8.40E-01 | 1.20E-04 |
| 335.14652 | 56.04  | 14.40 | 12.11 | 12.25 | 16.46 | 2.10E-27  | 5.67E-09 | 3.68E-08 | 4.02E-07 | 9.79E-01 | 4.72E-14 | 5.41E-14 |
| 335.1654  | 26.82  | 20.45 | 15.19 | 15.97 | 17.13 | 7.77E-44  | 3.65E-14 | 3.65E-14 | 7.07E-14 | 7.10E-02 | 7.59E-08 | 2.43E-03 |
| 335.19788 | 44.72  | 19.75 | 18.37 | 18.28 | 18.57 | 8.60E-38  | 3.65E-14 | 3.65E-14 | 5.32E-14 | 8.40E-01 | 2.33E-01 | 3.51E-02 |
| 335.221   | 30.35  | 20.94 | 18.87 | 19.94 | 20.56 | 2.00E-16  | 7.32E-14 | 7.78E-05 | 3.63E-01 | 3.39E-05 | 1.11E-10 | 4.75E-02 |
| 335.55331 | 282.2  | 14.50 | 14.59 | 15.70 | 13.93 | 1.55E-05  | 9.92E-01 | 2.06E-03 | 3.55E-01 | 7.75E-03 | 2.49E-01 | 6.21E-06 |
| 335.59413 | 252.24 | 15.58 | 17.47 | 18.33 | 17.55 | 1.12E-21  | 1.41E-11 | 6.01E-14 | 6.37E-12 | 5.68E-03 | 9.89E-01 | 1.96E-02 |
| 335.65589 | 25.51  | 14.82 | 18.03 | 12.13 | 12.44 | 1.85E-103 | 3.65E-14 | 3.65E-14 | 3.65E-14 | 3.65E-14 | 3.65E-14 | 2.17E-01 |
| 335.6663  | 36.68  | 17.19 | 13.01 | 16.58 | 15.96 | 1.91E-25  | 4.01E-14 | 2.99E-01 | 4.18E-03 | 7.38E-14 | 8.21E-13 | 3.33E-01 |
| 335.82205 | 51.1   | 19.21 | 17.78 | 17.84 | 17.23 | 3.68E-12  | 2.96E-07 | 7.92E-07 | 5.71E-12 | 9.95E-01 | 1.86E-01 | 1.09E-01 |
| 335.87668 | 43.67  | 14.49 | 14.17 | 14.71 | 14.45 | 3.00E-01  | 6.29E-01 | 8.59E-01 | 9.99E-01 | 2.17E-01 | 7.56E-01 | 8.11E-01 |
| 335.91908 | 45.63  | 16.60 | 16.00 | 15.18 | 15.85 | 1.30E-08  | 2.95E-02 | 1.42E-09 | 4.67E-03 | 1.52E-03 | 9.16E-01 | 1.79E-02 |
| 335.94205 | 47.63  | 15.20 | 14.76 | 15.20 | 15.34 | 1.88E-02  | 8.35E-02 | 1.00E+00 | 8.63E-01 | 9.67E-02 | 1.55E-02 | 8.68E-01 |
| 335.95641 | 51.36  | 16.31 | 16.39 | 16.53 | 15.53 | 1.45E-03  | 9.90E-01 | 8.32E-01 | 1.59E-02 | 9.55E-01 | 8.57E-03 | 1.38E-03 |
| 335.98251 | 93.97  | 17.87 | 16.90 | 16.96 | 16.24 | 3.96E-07  | 2.26E-03 | 3.93E-03 | 8.35E-08 | 9.98E-01 | 9.69E-02 | 5.94E-02 |
| 336.00004 | 49.41  | 15.16 | 14.03 | 15.52 | 13.69 | 5.26E-07  | 7.28E-03 | 7.32E-01 | 3.36E-04 | 2.57E-04 | 8.02E-01 | 7.63E-06 |
| 336.01036 | 77.01  | 17.08 | 20.58 | 20.84 | 19.94 | 3.98E-41  | 3.65E-14 | 3.65E-14 | 4.70E-14 | 7.05E-01 | 6.91E-02 | 2.82E-03 |
| 336.07301 | 73.79  | 17.43 | 17.52 | 16.84 | 17.81 | 4.94E-02  | 9.92E-01 | 2.94E-01 | 6.81E-01 | 1.99E-01 | 8.48E-01 | 3.23E-02 |
| 336.07635 | 288.04 | 14.77 | 16.90 | 17.16 | 15.89 | 3.57E-18  | 2.61E-13 | 7.41E-14 | 2.46E-04 | 7.59E-01 | 2.00E-03 | 3.88E-05 |
| 336.09586 | 180.51 | 10.92 | 14.64 | 14.27 | 14.49 | 3.78E-25  | 6.85E-14 | 7.46E-14 | 7.39E-14 | 7.42E-01 | 9.78E-01 | 9.37E-01 |
| 336.10386 | 127.76 | 14.53 | 15.71 | 15.15 | 14.87 | 9.32E-07  | 2.62E-07 | 1.62E-02 | 3.88E-01 | 4.32E-02 | 9.96E-04 | 5.82E-01 |
| 336.12864 | 51.66  | 17.78 | 16.35 | 16.36 | 16.37 | 3.04E-29  | 5.12E-14 | 5.18E-14 | 6.34E-14 | 1.00E+00 | 9.99E-01 | 1.00E+00 |
| 336.13985 | 295.99 | 11.03 | 14.28 | 14.51 | 12.95 | 2.89E-17  | 2.27E-13 | 7.54E-14 | 2.68E-05 | 9.36E-01 | 9.95E-03 | 1.29E-03 |
| 336.14019 | 120.91 | 19.44 | 20.38 | 20.24 | 19.86 | 6.28E-12  | 4.14E-11 | 1.24E-08 | 9.33E-03 | 7.31E-01 | 1.18E-03 | 2.84E-02 |
| 336.14993 | 95.94  | 16.16 | 14.37 | 14.70 | 15.22 | 7.72E-10  | 1.18E-09 | 7.11E-07 | 4.22E-03 | 6.13E-01 | 1.61E-02 | 2.63E-01 |
| 336.16954 | 25.82  | 17.84 | 12.10 | 14.22 | 14.57 | 8.67E-38  | 3.65E-14 | 7.15E-14 | 7.36E-14 | 8.12E-08 | 1.33E-09 | 7.75E-01 |
| 336.2014  | 45.05  | 16.98 | 14.59 | 14.73 | 14.89 | 1.50E-11  | 1.04E-09 | 6.59E-09 | 2.00E-07 | 9.81E-01 | 8.66E-01 | 9.77E-01 |
| 336.2217  | 25.83  | 19.05 | 20.63 | 19.45 | 20.23 | 2.22E-22  | 6.87E-14 | 3.38E-02 | 2.59E-12 | 3.15E-12 | 6.08E-02 | 8.44E-06 |
| 336.53367 | 109.27 | 15.72 | 14.87 | 13.56 | 14.53 | 9.30E-12  | 1.24E-02 | 1.01E-12 | 2.28E-04 | 4.09E-05 | 6.53E-01 | 5.69E-03 |
| 336.69054 | 44.97  | 22.48 | 21.12 | 21.05 | 20.59 | 6.74E-11  | 2.78E-06 | 5.80E-07 | 1.70E-10 | 9.94E-01 | 2.35E-01 | 3.53E-01 |
| 336.8336  | 48.76  | 15.05 | 14.71 | 14.52 | 15.17 | 7.42E-02  | 5.89E-01 | 1.84E-01 | 9.70E-01 | 8.88E-01 | 3.67E-01 | 9.14E-02 |
| 336.84362 | 34.83  | 16.08 | 17.53 | 18.42 | 17.94 | 7.77E-16  | 7.00E-07 | 7.61E-14 | 4.16E-10 | 6.62E-03 | 4.55E-01 | 3.20E-01 |
| 336.85288 | 59.84  | 12.92 | 16.30 | 16.49 | 16.27 | 3.32E-31  | 4.63E-14 | 3.76E-14 | 5.63E-14 | 9.22E-01 | 1.00E+00 | 8.99E-01 |
| 336.8716  | 43.77  | 15.02 | 17.75 | 18.25 | 17.51 | 1.47E-33  | 4.34E-14 | 3.65E-14 | 7.05E-14 | 1.71E-01 | 7.65E-01 | 1.65E-02 |
| 336.87839 | 50.61  | 13.04 | 14.77 | 14.80 | 14.23 | 3.43E-11  | 2.68E-09 | 9.00E-10 | 1.12E-04 | 9.99E-01 | 2.18E-01 | 1.66E-01 |
| 336.90353 | 38.22  | 13.28 | 14.17 | 15.48 | 13.76 | 5.97E-06  | 1.55E-01 | 2.33E-06 | 6.87E-01 | 1.56E-02 | 7.96E-01 | 8.71E-04 |
| 336.91267 | 39.46  | 15.42 | 17.85 | 17.26 | 17.15 | 9.49E-35  | 3.65E-14 | 5.25E-14 | 7.23E-14 | 3.72E-03 | 4.90E-04 | 9.07E-01 |
| 336.92054 | 47.61  | 15.10 | 14.29 | 15.73 | 13.79 | 1.66E-06  | 1.07E-01 | 2.73E-01 | 2.25E-03 | 5.64E-04 | 5.41E-01 | 2.47E-06 |
| 336.93491 | 27.18  | 14.19 | 13.03 | 13.11 | 13.41 | 7.68E-06  | 2.23E-05 | 8.10E-05 | 1.24E-02 | 9.88E-01 | 4.43E-01 | 6.38E-01 |
| 336.94404 | 105.56 | 16.24 | 13.55 | 11.68 | 14.56 | 7.28E-20  | 1.50E-08 | 6.89E-14 | 1.20E-03 | 2.25E-04 | 1.21E-01 | 7.90E-09 |
| 336.94998 | 52.23  | 16.67 | 16.91 | 16.65 | 16.05 | 3.26E-03  | 6.92E-01 | 9.99E-01 | 3.37E-02 | 6.33E-01 | 1.61E-03 | 5.41E-02 |
| 337.01028 | 86.62  | 15.56 | 16.58 | 16.63 | 16.24 | 1.82E-07  | 3.73E-06 | 9.18E-07 | 5.48E-03 | 9.96E-01 | 3.73E-01 | 2.51E-01 |
| 337.0273  | 291.89 | 16.74 | 17.99 | 18.07 | 16.68 | 4.13E-12  | 4.66E-07 | 6.38E-08 | 9.95E-01 | 9.88E-01 | 6.53E-07 | 1.04E-07 |
| 337.03934 | 55.16  | 16.11 | 16.91 | 16.01 | 16.45 | 1.43E-02  | 3.45E-02 | 9.85E-01 | 6.73E-01 | 1.56E-02 | 4.49E-01 | 4.79E-01 |
| 337.04142 | 246.63 | 17.11 | 16.74 | 18.22 | 17.26 | 3.50E-09  | 3.27E-01 | 4.31E-06 | 9.09E-01 | 1.88E-09 | 1.13E-01 | 2.64E-04 |
| 337.05619 | 48.38  | 17.29 | 15.54 | 15.74 | 16.31 | 1.48E-21  | 7.27E-14 | 7.34E-14 | 4.20E-07 | 6.37E-01 | 1.42E-04 | 8.70E-03 |

|           |        |       |       |       |       |          |          |          |          |          |          |          |
|-----------|--------|-------|-------|-------|-------|----------|----------|----------|----------|----------|----------|----------|
| 337.09985 | 61.54  | 14.93 | 14.17 | 15.37 | 14.24 | 2.05E-03 | 1.26E-01 | 5.84E-01 | 2.03E-01 | 4.78E-03 | 9.98E-01 | 1.09E-02 |
| 337.1436  | 113.21 | 16.82 | 16.80 | 16.74 | 16.47 | 1.09E-01 | 9.99E-01 | 9.51E-01 | 1.03E-01 | 9.84E-01 | 1.66E-01 | 3.06E-01 |
| 337.15318 | 88.63  | 18.84 | 18.88 | 19.15 | 18.50 | 1.46E-02 | 9.98E-01 | 3.57E-01 | 2.72E-01 | 4.94E-01 | 2.21E-01 | 5.80E-03 |
| 337.16694 | 23.13  | 17.07 | 17.34 | 15.21 | 15.48 | 4.63E-09 | 8.99E-01 | 7.97E-06 | 3.25E-04 | 6.75E-07 | 3.54E-05 | 9.08E-01 |
| 337.18223 | 21.43  | 18.39 | 7.91  | 9.69  | 13.06 | 6.90E-50 | 3.65E-14 | 3.65E-14 | 7.53E-14 | 9.59E-03 | 7.67E-14 | 1.30E-07 |
| 337.21381 | 45.77  | 19.83 | 17.97 | 18.16 | 18.13 | 1.30E-51 | 3.65E-14 | 3.65E-14 | 3.65E-14 | 2.79E-01 | 4.62E-01 | 9.93E-01 |
| 337.22497 | 26.06  | 15.06 | 17.76 | 16.24 | 17.14 | 8.02E-15 | 8.74E-14 | 1.22E-03 | 4.96E-09 | 2.58E-05 | 2.50E-01 | 3.50E-02 |
| 337.23733 | 26.26  | 18.22 | 15.72 | 16.06 | 17.58 | 3.71E-12 | 2.54E-10 | 3.30E-08 | 3.18E-01 | 8.01E-01 | 1.13E-05 | 4.10E-04 |
| 337.27355 | 25.49  | 20.57 | 18.90 | 19.13 | 19.41 | 4.13E-15 | 1.30E-13 | 3.81E-11 | 2.60E-07 | 6.88E-01 | 8.73E-02 | 5.59E-01 |
| 337.51943 | 301.42 | 15.52 | 17.36 | 15.94 | 15.49 | 8.94E-07 | 3.72E-06 | 6.33E-01 | 1.00E+00 | 8.54E-04 | 9.22E-06 | 6.18E-01 |
| 337.52921 | 291.74 | 15.25 | 14.75 | 15.64 | 14.26 | 1.99E-05 | 2.52E-01 | 4.78E-01 | 2.77E-03 | 8.57E-03 | 3.38E-01 | 1.64E-05 |
| 337.67071 | 27.15  | 15.74 | 17.02 | 15.88 | 14.21 | 1.83E-17 | 1.49E-05 | 9.45E-01 | 3.72E-07 | 2.42E-04 | 7.59E-14 | 4.80E-08 |
| 337.67648 | 32.86  | 15.35 | 14.07 | 16.98 | 16.41 | 8.78E-11 | 8.71E-03 | 3.53E-04 | 5.50E-02 | 1.20E-10 | 6.61E-07 | 5.24E-01 |
| 337.81911 | 48.95  | 17.77 | 15.56 | 15.02 | 14.87 | 5.04E-13 | 3.64E-07 | 1.32E-10 | 6.20E-11 | 5.33E-01 | 3.44E-01 | 9.83E-01 |
| 337.86599 | 114.42 | 14.47 | 16.93 | 12.63 | 16.78 | 1.66E-27 | 8.77E-10 | 4.38E-06 | 2.15E-08 | 4.67E-14 | 9.80E-01 | 6.43E-14 |
| 337.89708 | 101.77 | 14.44 | 17.32 | 14.07 | 16.97 | 7.74E-30 | 7.32E-14 | 5.46E-01 | 8.32E-14 | 5.63E-14 | 6.69E-01 | 7.32E-14 |
| 337.90836 | 52.48  | 20.20 | 19.28 | 20.12 | 18.77 | 1.40E-09 | 4.52E-04 | 9.83E-01 | 3.46E-08 | 2.41E-03 | 1.65E-01 | 4.22E-07 |
| 338.00723 | 86.13  | 15.56 | 17.02 | 17.23 | 16.62 | 8.08E-19 | 1.46E-13 | 7.38E-14 | 1.05E-07 | 6.47E-01 | 1.39E-01 | 5.88E-03 |
| 338.01404 | 51.48  | 17.02 | 17.96 | 18.57 | 18.13 | 4.07E-14 | 3.35E-06 | 8.94E-14 | 8.46E-08 | 7.96E-03 | 8.34E-01 | 1.03E-01 |
| 338.02084 | 308.14 | 13.47 | 13.72 | 12.12 | 12.22 | 6.81E-08 | 8.52E-01 | 1.08E-04 | 7.44E-04 | 6.28E-06 | 5.54E-05 | 9.88E-01 |
| 338.03022 | 283.51 | 14.47 | 16.92 | 16.93 | 16.59 | 2.71E-29 | 4.43E-14 | 4.19E-14 | 7.58E-14 | 1.00E+00 | 4.54E-01 | 4.14E-01 |
| 338.03735 | 67.88  | 17.92 | 16.01 | 15.18 | 16.61 | 1.11E-11 | 1.71E-06 | 3.27E-12 | 2.62E-03 | 1.13E-01 | 4.05E-01 | 1.21E-03 |
| 338.04748 | 198.48 | 19.64 | 21.96 | 22.42 | 22.11 | 6.98E-20 | 7.41E-13 | 7.45E-14 | 1.84E-13 | 4.10E-01 | 9.64E-01 | 7.31E-01 |
| 338.07617 | 288.01 | 17.73 | 21.06 | 21.34 | 19.75 | 1.69E-50 | 3.65E-14 | 3.65E-14 | 7.47E-14 | 5.26E-01 | 8.01E-09 | 2.58E-12 |
| 338.11029 | 32.23  | 12.56 | 14.25 | 17.98 | 16.18 | 3.26E-24 | 2.18E-03 | 4.32E-14 | 8.40E-12 | 2.05E-12 | 7.83E-04 | 1.88E-03 |
| 338.18194 | 56.09  | 15.98 | 15.63 | 15.95 | 16.13 | 2.78E-01 | 4.87E-01 | 9.99E-01 | 9.36E-01 | 5.87E-01 | 2.25E-01 | 8.98E-01 |
| 338.19599 | 25.19  | 14.52 | 16.86 | 11.01 | 11.67 | 1.01E-56 | 1.16E-13 | 3.67E-14 | 7.41E-14 | 3.65E-14 | 3.65E-14 | 1.16E-01 |
| 338.2176  | 40.36  | 17.09 | 14.97 | 15.49 | 16.22 | 8.27E-10 | 9.25E-10 | 3.52E-06 | 3.83E-02 | 3.90E-01 | 1.34E-03 | 1.20E-01 |
| 338.23226 | 23.42  | 15.59 | 12.07 | 14.50 | 12.96 | 1.01E-17 | 7.27E-14 | 2.11E-02 | 6.49E-10 | 9.76E-09 | 1.18E-01 | 7.63E-04 |
| 338.26898 | 208.25 | 16.28 | 10.48 | 11.36 | 12.62 | 7.45E-36 | 3.65E-14 | 3.70E-14 | 7.38E-14 | 1.37E-01 | 4.36E-06 | 1.43E-02 |
| 338.2767  | 23.7   | 18.28 | 13.60 | 15.22 | 16.19 | 3.24E-30 | 3.65E-14 | 7.45E-14 | 4.23E-08 | 3.12E-05 | 4.64E-11 | 3.34E-02 |
| 338.34136 | 23.51  | 17.22 | 16.51 | 16.47 | 16.19 | 4.60E-03 | 6.71E-02 | 4.70E-02 | 3.56E-03 | 9.99E-01 | 7.37E-01 | 7.94E-01 |
| 338.34142 | 278.32 | 18.31 | 16.73 | 16.59 | 16.23 | 9.23E-18 | 1.46E-10 | 2.06E-12 | 7.43E-14 | 9.24E-01 | 1.45E-01 | 4.13E-01 |
| 338.6437  | 28.65  | 16.11 | 18.83 | 18.11 | 18.55 | 3.70E-30 | 3.67E-14 | 7.47E-14 | 5.67E-14 | 6.87E-03 | 6.03E-01 | 2.15E-01 |
| 338.68789 | 45.02  | 21.86 | 20.50 | 20.43 | 20.01 | 1.04E-10 | 2.97E-06 | 5.50E-07 | 3.29E-10 | 9.92E-01 | 2.79E-01 | 4.22E-01 |
| 338.77671 | 45.94  | 15.61 | 16.49 | 16.58 | 16.36 | 1.93E-15 | 1.14E-11 | 1.61E-13 | 2.10E-08 | 8.99E-01 | 6.98E-01 | 2.89E-01 |
| 338.78498 | 48.08  | 16.07 | 17.96 | 17.97 | 17.67 | 3.12E-12 | 6.12E-10 | 3.29E-10 | 3.83E-07 | 1.00E+00 | 7.57E-01 | 7.29E-01 |
| 338.84194 | 43.66  | 14.69 | 14.98 | 16.19 | 15.42 | 1.90E-04 | 8.38E-01 | 1.12E-04 | 1.78E-01 | 4.25E-03 | 6.37E-01 | 1.46E-01 |
| 338.86972 | 43     | 14.07 | 15.24 | 15.20 | 14.29 | 2.06E-02 | 5.46E-02 | 6.69E-02 | 9.65E-01 | 1.00E+00 | 2.09E-01 | 2.44E-01 |
| 338.88945 | 85.44  | 13.46 | 16.18 | 14.96 | 14.63 | 6.57E-12 | 6.19E-13 | 8.67E-05 | 5.14E-03 | 3.32E-03 | 1.74E-04 | 8.04E-01 |
| 338.90932 | 26.46  | 16.64 | 15.51 | 14.44 | 14.87 | 2.68E-09 | 5.41E-03 | 2.50E-09 | 4.57E-06 | 1.29E-02 | 2.86E-01 | 6.29E-01 |
| 338.92039 | 47.61  | 15.31 | 16.40 | 17.42 | 16.54 | 1.36E-16 | 8.23E-06 | 7.44E-14 | 9.38E-07 | 6.48E-05 | 9.43E-01 | 9.91E-04 |
| 338.97104 | 38.44  | 17.14 | 16.71 | 16.49 | 16.36 | 3.58E-05 | 5.37E-02 | 6.43E-04 | 4.76E-05 | 5.61E-01 | 1.87E-01 | 8.74E-01 |
| 338.98689 | 92.3   | 15.33 | 15.46 | 12.22 | 15.34 | 7.84E-11 | 9.94E-01 | 1.12E-08 | 1.00E+00 | 8.43E-09 | 9.95E-01 | 6.89E-08 |
| 339.01088 | 53.03  | 18.19 | 18.43 | 19.00 | 18.17 | 3.98E-07 | 4.16E-01 | 1.94E-06 | 9.99E-01 | 2.27E-03 | 3.89E-01 | 4.27E-06 |
| 339.02076 | 61.36  | 19.74 | 18.50 | 19.30 | 18.35 | 4.58E-09 | 1.26E-06 | 2.20E-01 | 1.12E-07 | 4.93E-03 | 9.32E-01 | 7.64E-04 |
| 339.03648 | 57.48  | 15.59 | 11.64 | 14.24 | 12.17 | 1.91E-11 | 2.69E-10 | 8.17E-02 | 1.05E-07 | 7.81E-05 | 8.17E-01 | 3.56E-03 |
| 339.05475 | 218.55 | 17.49 | 21.29 | 21.91 | 20.73 | 8.19E-35 | 3.83E-14 | 3.65E-14 | 7.27E-14 | 2.24E-01 | 3.29E-01 | 2.38E-03 |
| 339.06566 | 255.78 | 13.20 | 12.65 | 15.41 | 14.74 | 7.41E-08 | 6.73E-01 | 4.66E-05 | 1.29E-02 | 5.50E-07 | 4.31E-04 | 5.52E-01 |
| 339.07927 | 131.04 | 13.52 | 14.52 | 15.45 | 15.79 | 7.44E-11 | 1.27E-02 | 5.60E-08 | 5.98E-10 | 3.03E-02 | 1.63E-03 | 7.44E-01 |
| 339.07959 | 294.14 | 12.09 | 16.78 | 17.08 | 15.76 | 1.30E-76 | 3.65E-14 | 3.65E-14 | 3.65E-14 | 3.85E-01 | 4.22E-06 | 1.01E-09 |
| 339.11817 | 32.04  | 15.17 | 13.36 | 17.51 | 16.39 | 1.02E-30 | 2.35E-08 | 4.20E-13 | 4.33E-04 | 3.65E-14 | 7.34E-14 | 1.98E-03 |
| 339.14576 | 28.79  | 12.32 | 16.70 | 15.89 | 16.22 | 1.69E-15 | 1.71E-13 | 6.74E-10 | 7.76E-11 | 4.47E-01 | 8.31E-01 | 9.34E-01 |
| 339.22619 | 22.61  | 15.42 | 17.39 | 15.01 | 16.91 | 1.97E-19 | 3.34E-12 | 3.67E-01 | 2.56E-07 | 7.42E-14 | 3.05E-01 | 1.13E-10 |
| 339.27158 | 193.81 | 16.70 | 8.95  | 10.65 | 10.20 | 1.30E-37 | 3.65E-14 | 4.14E-14 | 3.76E-14 | 8.01E-03 | 1.03E-01 | 8.41E-01 |
| 339.28905 | 25.3   | 20.29 | 18.20 | 18.36 | 18.93 | 1.59E-20 | 7.43E-14 | 7.54E-14 | 1.44E-08 | 8.69E-01 | 7.51E-03 | 6.00E-02 |
| 339.28933 | 153.73 | 19.00 | 16.57 | 16.78 | 16.66 | 1.24E-33 | 3.67E-14 | 4.10E-14 | 3.87E-14 | 7.18E-01 | 9.73E-01 | 9.34E-01 |
| 339.53692 | 84.68  | 14.63 | 16.25 | 16.76 | 16.28 | 7.66E-14 | 2.32E-08 | 2.90E-13 | 3.22E-08 | 2.53E-01 | 1.00E+00 | 3.20E-01 |
| 339.65072 | 99.12  | 13.35 | 15.26 | 16.45 | 15.71 | 8.28E-13 | 1.40E-05 | 5.77E-13 | 1.11E-07 | 1.70E-02 | 7.01E-01 | 2.70E-01 |
| 339.66801 | 28.76  | 13.36 | 15.72 | 16.52 | 15.78 | 1.79E-09 | 1.34E-05 | 2.08E-09 | 1.39E-05 | 3.71E-01 | 9.99E-01 | 4.62E-01 |
| 339.70451 | 27.46  | 15.76 | 18.14 | 14.77 | 15.07 | 7.05E-32 | 7.38E-14 | 3.25E-04 | 3.07E-02 | 3.65E-14 | 4.10E-14 | 6.48E-01 |
| 339.72771 | 22.65  | 14.09 | 15.78 | 12.81 | 15.53 | 3.62E-15 | 2.20E-05 | 2.02E-03 | 5.99E-04 | 2.50E-13 | 9.15E-01 | 3.41E-11 |
| 339.90545 | 53.69  | 17.82 | 16.83 | 17.11 | 16.18 | 6.75E-10 | 1.21E-04 | 1.02E-02 | 1.15E-10 | 6.22E-01 | 3.24E-02 | 5.97E-04 |
| 339.95682 | 53.07  | 15.63 | 17.12 | 17.34 | 16.61 | 1.65E-13 | 5.73E-10 | 1.04E-12 | 1.30E-04 | 7.68E-01 | 1.21E-01 | 8.95E-03 |
| 340.0071  | 48.14  | 17.66 | 14.31 | 16.17 | 16.12 | 2.45E-25 | 3.67E-14 | 2.52E-07 | 2.88E-07 | 4.30E-10 | 3.92E-09 | 9.98E-01 |
| 340.01022 | 280.1  | 20.87 | 20.67 | 20.83 | 20.68 | 6.39E-01 | 7.01E-01 | 9.96E-01 | 7.65E-01 | 8.36E-01 | 1.00E+00 | 8.81E-01 |
| 340.02015 | 286.7  | 14.03 | 14.75 | 14.84 | 15.28 | 2.06E-02 | 2.62E-01 | 1.59E-01 | 1.15E-02 | 9.95E-01 | 5.77E-01 | 7.13E-01 |
| 340.02178 | 80.12  | 16.57 | 13.11 | 14.63 | 15.22 | 1.72E-08 | 2.61E-09 | 1.54E-03 | 6.40E-02 | 2.82E-02 | 1.26E-03 | 7.17E-01 |

|           |        |       |       |       |       |          |          |          |          |          |          |          |
|-----------|--------|-------|-------|-------|-------|----------|----------|----------|----------|----------|----------|----------|
| 340.04337 | 200.56 | 15.76 | 17.80 | 17.85 | 18.24 | 5.80E-12 | 6.92E-08 | 2.36E-08 | 1.52E-10 | 9.99E-01 | 6.19E-01 | 6.99E-01 |
| 340.05221 | 192.14 | 9.56  | 12.64 | 12.55 | 13.32 | 2.10E-06 | 2.07E-04 | 2.87E-04 | 6.28E-06 | 9.99E-01 | 8.15E-01 | 7.48E-01 |
| 340.05832 | 204.16 | 11.38 | 15.49 | 15.31 | 15.69 | 3.62E-21 | 7.42E-14 | 7.74E-14 | 7.51E-14 | 9.81E-01 | 9.74E-01 | 8.52E-01 |
| 340.06327 | 229.5  | 16.03 | 18.15 | 19.17 | 17.65 | 5.97E-35 | 7.36E-14 | 3.65E-14 | 4.75E-12 | 1.58E-05 | 9.83E-02 | 1.48E-10 |
| 340.08092 | 262.63 | 13.25 | 18.27 | 18.40 | 17.01 | 5.49E-39 | 3.65E-14 | 3.65E-14 | 7.24E-14 | 9.83E-01 | 4.48E-03 | 1.14E-03 |
| 340.08241 | 126.91 | 13.63 | 16.29 | 16.60 | 16.17 | 3.15E-16 | 1.11E-11 | 1.06E-13 | 2.66E-10 | 8.37E-01 | 9.87E-01 | 6.57E-01 |
| 340.17693 | 107.19 | 12.27 | 16.55 | 17.07 | 16.04 | 1.62E-45 | 3.65E-14 | 3.65E-14 | 3.65E-14 | 2.78E-01 | 3.34E-01 | 3.71E-03 |
| 340.22306 | 57.18  | 15.96 | 15.66 | 15.63 | 15.33 | 6.62E-02 | 5.38E-01 | 4.52E-01 | 3.48E-02 | 9.99E-01 | 5.16E-01 | 5.84E-01 |
| 340.23392 | 23.96  | 17.44 | 20.11 | 18.77 | 19.68 | 1.48E-27 | 3.74E-14 | 1.78E-08 | 7.34E-14 | 3.57E-08 | 2.39E-01 | 4.81E-04 |
| 340.24786 | 23.38  | 16.92 | 16.85 | 16.50 | 16.67 | 2.67E-01 | 9.87E-01 | 2.45E-01 | 6.98E-01 | 4.54E-01 | 8.84E-01 | 8.97E-01 |
| 340.28416 | 23.85  | 18.21 | 14.95 | 15.46 | 15.77 | 8.67E-49 | 3.65E-14 | 3.65E-14 | 3.65E-14 | 2.94E-02 | 1.21E-04 | 3.41E-01 |
| 340.28427 | 285.04 | 19.57 | 18.79 | 18.65 | 18.35 | 4.32E-03 | 1.05E-01 | 3.66E-02 | 3.20E-03 | 9.80E-01 | 6.08E-01 | 8.24E-01 |
| 340.29237 | 23.14  | 18.08 | 14.36 | 13.94 | 15.23 | 1.20E-29 | 5.25E-14 | 3.67E-14 | 1.08E-13 | 5.97E-01 | 6.75E-02 | 1.49E-03 |
| 340.32082 | 22.63  | 16.00 | 15.24 | 14.15 | 14.47 | 2.33E-11 | 2.11E-02 | 6.64E-11 | 2.24E-07 | 3.33E-04 | 2.92E-02 | 6.34E-01 |
| 340.51145 | 112.27 | 9.16  | 14.28 | 15.60 | 14.20 | 3.47E-25 | 7.52E-14 | 4.43E-14 | 7.76E-14 | 1.05E-01 | 9.99E-01 | 8.51E-02 |
| 340.55409 | 302.24 | 15.45 | 15.73 | 15.21 | 14.98 | 1.31E-04 | 2.88E-01 | 4.34E-01 | 2.44E-02 | 8.72E-03 | 8.31E-05 | 5.23E-01 |
| 340.67582 | 28.11  | 16.15 | 18.79 | 18.74 | 18.77 | 2.27E-39 | 3.65E-14 | 3.65E-14 | 3.65E-14 | 9.94E-01 | 1.00E+00 | 9.99E-01 |
| 340.68469 | 47.58  | 20.45 | 18.96 | 18.88 | 18.60 | 5.78E-13 | 2.88E-08 | 3.62E-09 | 1.80E-11 | 9.89E-01 | 4.97E-01 | 6.81E-01 |
| 340.7116  | 30.71  | 9.35  | 18.66 | 7.10  | 9.16  | 2.63E-70 | 3.65E-14 | 3.32E-06 | 9.75E-01 | 3.65E-14 | 3.65E-14 | 7.91E-05 |
| 340.73556 | 22.39  | 16.64 | 18.83 | 17.44 | 18.44 | 1.67E-19 | 7.61E-14 | 2.17E-03 | 1.69E-12 | 4.00E-08 | 3.45E-01 | 2.19E-04 |
| 340.77449 | 45.65  | 15.77 | 16.18 | 16.26 | 16.06 | 1.58E-05 | 4.44E-04 | 1.66E-05 | 2.68E-02 | 8.91E-01 | 7.06E-01 | 2.85E-01 |
| 340.78205 | 48.14  | 16.65 | 18.47 | 18.47 | 18.27 | 4.84E-13 | 1.76E-10 | 1.28E-10 | 3.31E-08 | 1.00E+00 | 8.84E-01 | 8.86E-01 |
| 340.82679 | 47.76  | 14.88 | 16.16 | 16.56 | 15.45 | 3.24E-10 | 3.97E-06 | 6.05E-10 | 1.21E-01 | 3.97E-01 | 3.89E-02 | 1.93E-04 |
| 340.86403 | 20.07  | 16.65 | 10.72 | 12.41 | 12.53 | 6.23E-46 | 3.65E-14 | 3.65E-14 | 3.72E-14 | 4.48E-06 | 1.72E-06 | 9.83E-01 |
| 340.93458 | 35.64  | 15.95 | 17.58 | 18.99 | 18.12 | 1.95E-57 | 3.92E-14 | 3.65E-14 | 3.65E-14 | 7.43E-14 | 1.35E-03 | 3.89E-08 |
| 340.96406 | 87.52  | 15.99 | 16.75 | 17.06 | 16.61 | 2.80E-03 | 4.47E-02 | 1.37E-03 | 1.64E-01 | 7.25E-01 | 9.65E-01 | 4.44E-01 |
| 340.97918 | 67.73  | 17.51 | 16.34 | 16.73 | 16.41 | 5.71E-04 | 9.35E-04 | 5.35E-02 | 3.19E-03 | 5.85E-01 | 9.95E-01 | 7.50E-01 |
| 341.00285 | 305.2  | 16.21 | 18.49 | 18.96 | 16.16 | 9.14E-36 | 7.29E-14 | 3.70E-14 | 9.96E-01 | 1.71E-01 | 7.25E-14 | 3.90E-14 |
| 341.01329 | 52.89  | 18.00 | 15.09 | 16.24 | 15.89 | 6.11E-23 | 4.85E-14 | 2.25E-10 | 3.77E-13 | 1.06E-04 | 1.84E-02 | 5.63E-01 |
| 341.05119 | 208.23 | 12.03 | 17.16 | 16.83 | 16.53 | 5.69E-34 | 3.65E-14 | 3.72E-14 | 5.32E-14 | 8.47E-01 | 4.21E-01 | 8.78E-01 |
| 341.13551 | 37.87  | 18.44 | 14.91 | 14.35 | 15.52 | 1.94E-26 | 7.47E-14 | 4.10E-14 | 2.35E-13 | 3.95E-01 | 3.55E-01 | 8.58E-03 |
| 341.17899 | 42.21  | 16.70 | 19.49 | 18.87 | 19.50 | 3.71E-34 | 3.65E-14 | 7.13E-14 | 3.67E-14 | 2.31E-02 | 1.00E+00 | 2.67E-02 |
| 341.21501 | 42.8   | 15.02 | 16.45 | 12.30 | 13.61 | 5.37E-21 | 1.31E-03 | 5.40E-11 | 2.06E-03 | 6.83E-14 | 1.40E-10 | 7.00E-03 |
| 341.24189 | 23.04  | 16.94 | 19.99 | 18.54 | 19.22 | 7.34E-33 | 3.65E-14 | 4.67E-12 | 7.16E-14 | 1.07E-09 | 3.71E-03 | 1.37E-02 |
| 341.25085 | 23.3   | 13.70 | 12.56 | 14.06 | 13.79 | 7.04E-05 | 3.14E-03 | 6.69E-01 | 9.91E-01 | 6.11E-05 | 2.30E-03 | 8.62E-01 |
| 341.26842 | 22.18  | 17.33 | 13.69 | 14.08 | 14.67 | 3.56E-66 | 3.65E-14 | 3.65E-14 | 3.65E-14 | 6.96E-02 | 4.58E-08 | 1.77E-03 |
| 341.26859 | 291.65 | 19.23 | 17.06 | 17.11 | 17.11 | 5.62E-18 | 1.21E-13 | 1.86E-13 | 7.10E-13 | 9.96E-01 | 9.97E-01 | 1.00E+00 |
| 341.28753 | 291.53 | 17.68 | 16.17 | 16.22 | 15.88 | 5.92E-13 | 6.40E-09 | 1.46E-08 | 1.92E-11 | 9.97E-01 | 6.69E-01 | 5.36E-01 |
| 341.2878  | 185.47 | 18.18 | 15.26 | 15.31 | 15.87 | 5.25E-41 | 3.65E-14 | 3.65E-14 | 4.36E-14 | 9.95E-01 | 1.89E-02 | 3.38E-02 |
| 341.3045  | 24.15  | 21.65 | 19.55 | 19.40 | 18.98 | 4.19E-32 | 6.89E-14 | 4.79E-14 | 3.65E-14 | 8.94E-01 | 3.54E-02 | 1.73E-01 |
| 341.30484 | 141.34 | 22.36 | 22.28 | 21.24 | 20.75 | 6.63E-03 | 9.99E-01 | 1.33E-01 | 1.54E-02 | 2.12E-01 | 3.12E-02 | 8.11E-01 |
| 341.66582 | 32.35  | 15.08 | 12.68 | 16.09 | 14.60 | 1.17E-17 | 1.13E-10 | 1.50E-02 | 5.15E-01 | 7.37E-14 | 1.30E-06 | 2.30E-04 |
| 341.7434  | 22.35  | 16.04 | 18.71 | 17.32 | 17.83 | 7.50E-17 | 7.43E-14 | 3.91E-05 | 1.21E-08 | 1.25E-05 | 1.74E-02 | 2.95E-01 |
| 341.86327 | 45.51  | 16.47 | 13.36 | 12.68 | 13.24 | 7.05E-19 | 3.51E-12 | 7.56E-14 | 1.90E-12 | 3.63E-01 | 9.91E-01 | 5.64E-01 |
| 341.88677 | 45.87  | 15.61 | 13.82 | 14.21 | 14.01 | 1.30E-07 | 5.12E-07 | 1.22E-04 | 1.72E-05 | 6.27E-01 | 9.39E-01 | 9.35E-01 |
| 341.95537 | 49.66  | 14.77 | 15.66 | 16.12 | 15.84 | 3.39E-09 | 1.73E-04 | 3.12E-09 | 7.07E-06 | 1.49E-01 | 8.48E-01 | 5.95E-01 |
| 341.96273 | 47.89  | 17.06 | 16.80 | 17.63 | 17.32 | 5.41E-06 | 3.69E-01 | 1.48E-03 | 3.45E-01 | 3.09E-06 | 1.02E-02 | 2.42E-01 |
| 341.98683 | 80.39  | 15.92 | 18.45 | 16.68 | 17.79 | 6.22E-21 | 7.03E-14 | 1.01E-02 | 1.28E-11 | 1.43E-10 | 5.75E-02 | 1.42E-04 |
| 342.06249 | 271.11 | 16.86 | 17.70 | 17.44 | 17.41 | 1.25E-01 | 9.21E-02 | 3.63E-01 | 4.29E-01 | 8.94E-01 | 8.81E-01 | 1.00E+00 |
| 342.13915 | 280.36 | 15.77 | 20.11 | 20.13 | 19.07 | 8.95E-40 | 3.65E-14 | 3.65E-14 | 6.43E-14 | 1.00E+00 | 6.05E-03 | 4.09E-03 |
| 342.18515 | 28.37  | 15.64 | 18.03 | 16.61 | 15.95 | 1.61E-09 | 1.63E-09 | 3.61E-02 | 8.38E-01 | 9.25E-04 | 8.39E-07 | 3.04E-01 |
| 342.24968 | 23.4   | 17.61 | 20.61 | 19.32 | 20.03 | 5.38E-36 | 3.65E-14 | 8.23E-14 | 4.10E-14 | 8.36E-09 | 3.32E-02 | 4.37E-03 |
| 342.26349 | 23.5   | 17.99 | 18.67 | 18.62 | 18.46 | 4.26E-03 | 6.25E-03 | 1.25E-02 | 1.19E-01 | 9.95E-01 | 7.77E-01 | 8.87E-01 |
| 342.27767 | 30.97  | 17.11 | 15.44 | 15.87 | 16.44 | 7.71E-06 | 5.49E-06 | 1.13E-03 | 2.01E-01 | 5.83E-01 | 2.41E-02 | 3.57E-01 |
| 342.30041 | 298.81 | 16.46 | 16.29 | 15.90 | 15.89 | 3.60E-01 | 9.73E-01 | 4.57E-01 | 4.59E-01 | 7.48E-01 | 7.40E-01 | 1.00E+00 |
| 342.30058 | 153.47 | 18.81 | 15.86 | 15.40 | 16.40 | 2.29E-50 | 3.65E-14 | 3.65E-14 | 3.65E-14 | 7.08E-02 | 2.59E-02 | 2.18E-06 |
| 342.3079  | 24.53  | 19.89 | 16.27 | 16.38 | 16.01 | 8.44E-51 | 3.65E-14 | 3.65E-14 | 3.65E-14 | 9.58E-01 | 6.68E-01 | 3.60E-01 |
| 342.30803 | 287.3  | 20.97 | 19.72 | 19.81 | 19.16 | 2.62E-04 | 1.35E-02 | 2.41E-02 | 1.42E-04 | 9.96E-01 | 5.66E-01 | 4.27E-01 |
| 342.30818 | 153.46 | 20.47 | 19.15 | 19.47 | 19.26 | 2.39E-03 | 3.73E-03 | 4.23E-02 | 1.16E-02 | 8.53E-01 | 9.94E-01 | 9.52E-01 |
| 342.33648 | 22.77  | 17.51 | 15.81 | 15.36 | 15.22 | 5.87E-17 | 4.52E-09 | 1.77E-13 | 1.02E-13 | 3.42E-01 | 1.56E-01 | 9.61E-01 |
| 342.60159 | 267.72 | 14.64 | 17.02 | 17.56 | 17.23 | 9.70E-34 | 5.72E-14 | 3.65E-14 | 4.30E-14 | 7.89E-02 | 8.12E-01 | 4.68E-01 |
| 342.68455 | 40.67  | 18.47 | 18.88 | 18.87 | 16.45 | 4.58E-15 | 4.79E-01 | 5.06E-01 | 6.70E-10 | 1.00E+00 | 7.56E-13 | 7.01E-13 |
| 342.75112 | 23.23  | 16.73 | 19.40 | 18.34 | 18.90 | 3.44E-30 | 3.65E-14 | 3.67E-13 | 7.01E-14 | 3.08E-06 | 8.89E-02 | 4.03E-02 |
| 342.77905 | 49.24  | 17.05 | 17.37 | 17.32 | 17.28 | 3.76E-01 | 3.69E-01 | 4.99E-01 | 6.80E-01 | 9.96E-01 | 9.70E-01 | 9.96E-01 |
| 342.82358 | 47.53  | 14.58 | 16.31 | 16.70 | 15.84 | 5.99E-23 | 7.45E-14 | 5.70E-14 | 6.54E-09 | 1.99E-01 | 1.05E-01 | 1.96E-04 |
| 342.86056 | 46.46  | 16.66 | 15.76 | 16.15 | 16.36 | 5.56E-04 | 2.05E-04 | 7.84E-02 | 5.23E-01 | 2.79E-01 | 4.09E-02 | 7.84E-01 |
| 342.86851 | 48.98  | 16.54 | 17.73 | 17.78 | 18.05 | 7.43E-15 | 2.19E-09 | 3.72E-10 | 3.06E-13 | 9.95E-01 | 3.54E-01 | 4.84E-01 |
| 342.87864 | 44.3   | 13.25 | 16.27 | 16.24 | 15.71 | 9.15E-25 | 6.83E-14 | 6.87E-14 | 1.26E-13 | 1.00E+00 | 2.45E-01 | 2.86E-01 |

|           |        |       |       |       |       |          |          |          |          |          |          |          |
|-----------|--------|-------|-------|-------|-------|----------|----------|----------|----------|----------|----------|----------|
| 342.95687 | 59.81  | 16.77 | 16.80 | 16.57 | 17.05 | 1.83E-01 | 9.98E-01 | 7.68E-01 | 5.30E-01 | 6.91E-01 | 6.57E-01 | 1.17E-01 |
| 342.97426 | 44.29  | 15.90 | 15.02 | 17.00 | 15.92 | 5.63E-08 | 2.13E-02 | 1.79E-03 | 1.00E+00 | 6.54E-09 | 2.95E-02 | 4.36E-03 |
| 342.98422 | 87.48  | 13.85 | 16.84 | 14.00 | 16.18 | 1.33E-15 | 3.24E-12 | 9.78E-01 | 1.09E-07 | 9.77E-11 | 3.90E-01 | 1.42E-06 |
| 343.01267 | 260.22 | 16.07 | 16.67 | 15.74 | 14.98 | 1.87E-06 | 1.53E-01 | 6.59E-01 | 1.67E-03 | 9.25E-03 | 4.63E-07 | 6.10E-02 |
| 343.05258 | 42.25  | 15.47 | 15.52 | 16.13 | 16.25 | 3.68E-02 | 9.99E-01 | 1.73E-01 | 9.03E-02 | 2.60E-01 | 1.46E-01 | 9.84E-01 |
| 343.06575 | 87     | 17.33 | 11.29 | 11.58 | 11.90 | 6.43E-25 | 6.85E-14 | 7.37E-14 | 7.38E-14 | 9.59E-01 | 7.44E-01 | 9.52E-01 |
| 343.09342 | 292.25 | 15.04 | 17.07 | 18.21 | 16.73 | 3.11E-21 | 1.26E-10 | 5.61E-14 | 1.92E-07 | 8.76E-04 | 6.82E-01 | 1.20E-05 |
| 343.14192 | 288.78 | 14.74 | 15.16 | 15.96 | 15.21 | 1.25E-03 | 5.16E-01 | 4.10E-04 | 4.35E-01 | 5.19E-02 | 9.98E-01 | 9.05E-02 |
| 343.16017 | 55.62  | 17.01 | 17.10 | 16.94 | 16.80 | 4.16E-01 | 9.58E-01 | 9.77E-01 | 6.19E-01 | 8.12E-01 | 3.51E-01 | 8.53E-01 |
| 343.1936  | 30.74  | 18.20 | 21.79 | 20.18 | 21.59 | 2.05E-56 | 3.65E-14 | 5.25E-14 | 3.65E-14 | 7.43E-14 | 7.13E-01 | 5.60E-12 |
| 343.22582 | 27.23  | 16.85 | 11.96 | 13.36 | 14.20 | 2.34E-25 | 3.76E-14 | 7.59E-14 | 4.78E-09 | 4.38E-03 | 1.93E-06 | 1.93E-01 |
| 343.2515  | 24.25  | 14.42 | 17.27 | 16.52 | 16.20 | 2.57E-14 | 9.47E-14 | 8.93E-09 | 3.36E-06 | 1.29E-01 | 1.46E-02 | 7.96E-01 |
| 343.26644 | 23.51  | 15.10 | 14.84 | 15.23 | 15.11 | 8.06E-01 | 9.06E-01 | 9.89E-01 | 1.00E+00 | 7.68E-01 | 9.12E-01 | 9.93E-01 |
| 343.28549 | 33.41  | 18.20 | 16.88 | 16.66 | 17.06 | 9.63E-08 | 1.40E-05 | 2.06E-07 | 3.81E-04 | 8.55E-01 | 9.21E-01 | 4.89E-01 |
| 343.29531 | 27.39  | 17.72 | 17.45 | 16.57 | 18.15 | 6.03E-04 | 8.82E-01 | 9.94E-03 | 6.53E-01 | 9.47E-02 | 2.67E-01 | 3.27E-04 |
| 343.31121 | 23.9   | 16.10 | 10.49 | 11.62 | 9.43  | 5.62E-38 | 3.65E-14 | 7.09E-14 | 3.65E-14 | 5.31E-02 | 9.68E-02 | 1.43E-05 |
| 343.31167 | 161.53 | 18.63 | 13.27 | 14.06 | 12.93 | 2.04E-42 | 3.65E-14 | 3.67E-14 | 3.65E-14 | 1.47E-01 | 7.99E-01 | 1.60E-02 |
| 343.59518 | 297.07 | 12.32 | 16.57 | 17.03 | 15.08 | 6.99E-23 | 7.53E-14 | 6.65E-14 | 3.98E-08 | 7.42E-01 | 9.57E-03 | 2.46E-04 |
| 343.63637 | 29.73  | 14.81 | 15.78 | 18.63 | 17.94 | 4.15E-28 | 1.55E-02 | 3.94E-14 | 7.41E-14 | 8.16E-14 | 8.12E-09 | 1.83E-01 |
| 343.78716 | 39.42  | 17.15 | 13.95 | 14.05 | 14.89 | 1.42E-09 | 2.49E-08 | 5.22E-08 | 2.11E-04 | 9.98E-01 | 3.29E-01 | 4.25E-01 |
| 343.85336 | 50.12  | 18.39 | 17.00 | 17.36 | 16.17 | 6.48E-09 | 1.66E-04 | 8.68E-03 | 1.38E-09 | 6.99E-01 | 7.89E-02 | 3.31E-03 |
| 343.86137 | 49.76  | 17.44 | 19.88 | 20.03 | 19.47 | 3.41E-47 | 3.65E-14 | 3.65E-14 | 3.65E-14 | 7.69E-01 | 5.26E-02 | 2.80E-03 |
| 343.94536 | 84.57  | 15.62 | 21.02 | 20.99 | 19.39 | 2.67E-58 | 3.65E-14 | 3.65E-14 | 3.65E-14 | 1.00E+00 | 1.92E-07 | 2.55E-07 |
| 343.95907 | 48.37  | 14.92 | 14.14 | 14.49 | 14.71 | 3.76E-01 | 3.14E-01 | 7.72E-01 | 9.69E-01 | 8.75E-01 | 6.33E-01 | 9.66E-01 |
| 343.99647 | 39.99  | 11.96 | 8.61  | 13.34 | 14.74 | 1.48E-33 | 1.24E-13 | 3.59E-03 | 8.10E-10 | 4.65E-14 | 3.65E-14 | 5.69E-03 |
| 344.00449 | 92.85  | 16.89 | 16.97 | 16.33 | 16.61 | 2.25E-01 | 9.94E-01 | 3.25E-01 | 8.48E-01 | 2.32E-01 | 7.31E-01 | 8.49E-01 |
| 344.0334  | 71.57  | 20.31 | 21.18 | 21.55 | 20.89 | 1.19E-12 | 4.08E-07 | 4.86E-13 | 2.32E-03 | 1.04E-01 | 2.77E-01 | 4.18E-04 |
| 344.05921 | 90.26  | 16.07 | 19.40 | 19.93 | 18.37 | 3.42E-44 | 3.65E-14 | 3.65E-14 | 7.47E-14 | 1.09E-01 | 1.60E-04 | 2.65E-09 |
| 344.06565 | 230.69 | 16.05 | 16.98 | 16.92 | 17.58 | 3.34E-10 | 7.53E-05 | 2.16E-04 | 5.99E-11 | 9.92E-01 | 3.23E-02 | 1.34E-02 |
| 344.08996 | 60.64  | 16.96 | 17.37 | 17.48 | 17.32 | 2.48E-01 | 4.33E-01 | 2.18E-01 | 5.71E-01 | 9.79E-01 | 9.98E-01 | 9.43E-01 |
| 344.13761 | 33.41  | 14.80 | 12.26 | 16.45 | 16.02 | 9.93E-24 | 3.15E-10 | 5.47E-05 | 7.69E-03 | 5.52E-14 | 7.41E-14 | 6.76E-01 |
| 344.19727 | 25.79  | 16.05 | 19.13 | 17.23 | 19.09 | 1.72E-39 | 3.65E-14 | 4.23E-07 | 3.65E-14 | 7.64E-14 | 9.97E-01 | 1.23E-13 |
| 344.22789 | 24     | 19.69 | 14.19 | 14.12 | 15.93 | 4.68E-61 | 3.65E-14 | 3.65E-14 | 3.65E-14 | 9.94E-01 | 1.71E-08 | 3.16E-09 |
| 344.24381 | 23.16  | 16.22 | 15.84 | 17.70 | 17.00 | 1.51E-20 | 1.54E-01 | 1.34E-13 | 2.10E-04 | 7.32E-14 | 3.16E-08 | 1.43E-03 |
| 344.27933 | 23.57  | 19.81 | 20.25 | 20.63 | 20.17 | 3.61E-03 | 1.83E-01 | 1.20E-03 | 3.67E-01 | 3.42E-01 | 9.87E-01 | 2.03E-01 |
| 344.58329 | 290.07 | 12.47 | 15.32 | 14.95 | 12.34 | 1.32E-11 | 6.06E-08 | 2.28E-06 | 9.94E-01 | 8.76E-01 | 9.57E-08 | 2.90E-06 |
| 344.644   | 29.83  | 15.99 | 15.04 | 17.14 | 16.86 | 7.18E-16 | 4.83E-04 | 1.11E-05 | 2.69E-03 | 8.26E-14 | 4.94E-11 | 6.55E-01 |
| 344.69674 | 39.55  | 13.25 | 17.45 | 15.89 | 16.06 | 1.39E-16 | 7.54E-14 | 5.43E-08 | 2.17E-08 | 4.08E-03 | 1.88E-02 | 9.82E-01 |
| 344.72216 | 44.97  | 19.73 | 19.74 | 19.59 | 19.33 | 2.82E-01 | 1.00E+00 | 9.20E-01 | 2.99E-01 | 9.19E-01 | 3.14E-01 | 6.81E-01 |
| 344.7295  | 52.9   | 15.58 | 14.67 | 14.96 | 14.27 | 6.43E-03 | 6.68E-02 | 3.35E-01 | 3.75E-03 | 8.60E-01 | 7.46E-01 | 2.85E-01 |
| 344.85772 | 43.74  | 16.10 | 20.01 | 20.92 | 19.47 | 9.12E-53 | 3.65E-14 | 3.65E-14 | 3.65E-14 | 1.66E-03 | 1.60E-01 | 2.33E-07 |
| 344.87173 | 25.16  | 20.16 | 21.88 | 22.23 | 21.09 | 5.93E-13 | 7.26E-09 | 2.21E-12 | 5.14E-03 | 5.74E-01 | 3.29E-02 | 4.58E-04 |
| 344.87547 | 267.63 | 18.38 | 9.75  | 9.38  | 11.15 | 5.41E-34 | 3.67E-14 | 3.65E-14 | 7.13E-14 | 9.52E-01 | 2.14E-01 | 6.70E-02 |
| 344.89032 | 46.83  | 15.83 | 14.39 | 15.88 | 15.40 | 3.90E-06 | 1.72E-05 | 9.99E-01 | 5.06E-01 | 1.49E-05 | 8.93E-03 | 4.38E-01 |
| 344.94597 | 85.21  | 12.71 | 17.02 | 16.83 | 15.22 | 4.86E-33 | 3.65E-14 | 3.67E-14 | 1.10E-11 | 9.35E-01 | 2.54E-06 | 2.95E-05 |
| 344.95511 | 44.68  | 16.11 | 16.57 | 17.75 | 16.81 | 2.92E-12 | 1.22E-01 | 6.02E-13 | 6.25E-03 | 5.17E-07 | 6.89E-01 | 1.55E-04 |
| 344.99975 | 42.82  | 22.20 | 23.48 | 23.71 | 23.80 | 1.24E-15 | 2.90E-09 | 1.75E-12 | 6.41E-13 | 6.52E-01 | 4.07E-01 | 9.72E-01 |
| 345.02866 | 279.73 | 20.15 | 20.76 | 21.83 | 20.71 | 4.97E-03 | 5.60E-01 | 1.97E-03 | 6.41E-01 | 1.16E-01 | 1.00E+00 | 1.07E-01 |
| 345.03788 | 55.78  | 16.43 | 15.17 | 16.67 | 16.24 | 1.74E-05 | 3.18E-04 | 8.46E-01 | 9.37E-01 | 1.67E-05 | 5.73E-03 | 5.39E-01 |
| 345.0777  | 272.25 | 17.20 | 15.89 | 16.90 | 15.72 | 1.25E-05 | 6.34E-04 | 7.92E-01 | 1.41E-04 | 1.83E-02 | 9.67E-01 | 5.29E-03 |
| 345.10552 | 254.75 | 15.79 | 19.76 | 20.09 | 18.65 | 5.69E-37 | 3.65E-14 | 3.65E-14 | 7.53E-14 | 6.92E-01 | 3.08E-03 | 4.12E-05 |
| 345.19441 | 69.56  | 15.04 | 16.63 | 16.37 | 15.72 | 4.85E-10 | 1.73E-09 | 4.18E-07 | 3.06E-02 | 7.18E-01 | 2.61E-03 | 5.45E-02 |
| 345.20828 | 25.74  | 15.06 | 17.75 | 15.59 | 17.70 | 1.67E-14 | 7.07E-11 | 4.79E-01 | 4.41E-10 | 3.72E-07 | 9.99E-01 | 1.38E-06 |
| 345.24242 | 23.87  | 17.28 | 13.69 | 14.99 | 16.22 | 1.62E-33 | 3.65E-14 | 7.51E-14 | 2.28E-04 | 3.55E-06 | 7.44E-14 | 2.54E-05 |
| 345.25308 | 22.07  | 13.63 | 13.58 | 16.44 | 15.05 | 5.66E-19 | 9.98E-01 | 7.41E-14 | 8.82E-05 | 7.54E-14 | 8.08E-05 | 1.98E-04 |
| 345.26479 | 25.08  | 17.39 | 14.19 | 14.68 | 15.53 | 1.16E-16 | 7.52E-14 | 3.79E-12 | 5.07E-06 | 5.46E-01 | 2.85E-03 | 1.10E-01 |
| 345.28223 | 23.41  | 17.80 | 17.40 | 18.00 | 17.69 | 6.98E-02 | 2.67E-01 | 8.02E-01 | 9.63E-01 | 4.22E-02 | 5.94E-01 | 5.48E-01 |
| 345.53203 | 250.13 | 18.53 | 17.90 | 19.21 | 18.69 | 2.16E-04 | 1.25E-01 | 6.82E-02 | 9.39E-01 | 5.50E-05 | 4.35E-02 | 2.95E-01 |
| 345.6231  | 27.33  | 15.54 | 16.00 | 14.07 | 17.51 | 1.98E-19 | 4.47E-01 | 1.83E-05 | 1.50E-08 | 3.09E-08 | 3.84E-05 | 7.05E-14 |
| 345.65191 | 29.57  | 15.06 | 16.45 | 18.64 | 18.08 | 9.52E-36 | 4.76E-07 | 3.65E-14 | 4.14E-14 | 8.16E-14 | 1.71E-08 | 1.38E-01 |
| 345.75446 | 21.78  | 14.54 | 12.49 | 15.39 | 14.02 | 1.05E-17 | 9.40E-11 | 1.69E-02 | 3.02E-01 | 7.41E-14 | 6.21E-06 | 6.02E-05 |
| 345.85122 | 49.97  | 17.56 | 15.71 | 15.65 | 14.46 | 1.62E-11 | 2.88E-05 | 1.10E-05 | 3.65E-12 | 9.98E-01 | 1.61E-02 | 2.38E-02 |
| 345.85896 | 50.41  | 16.70 | 19.95 | 20.14 | 19.46 | 5.09E-46 | 3.65E-14 | 3.65E-14 | 3.65E-14 | 8.07E-01 | 1.19E-01 | 1.10E-02 |
| 345.8934  | 304.3  | 15.23 | 18.94 | 17.67 | 17.28 | 1.28E-40 | 3.65E-14 | 4.79E-14 | 7.43E-14 | 2.05E-07 | 4.01E-11 | 3.07E-01 |
| 345.91719 | 309.46 | 13.56 | 13.22 | 10.81 | 11.45 | 5.74E-28 | 4.85E-01 | 4.54E-14 | 8.55E-14 | 7.58E-14 | 2.23E-10 | 6.18E-02 |
| 345.94166 | 77.09  | 15.62 | 17.97 | 17.98 | 16.98 | 2.04E-21 | 7.43E-14 | 7.47E-14 | 7.91E-07 | 1.00E+00 | 9.18E-04 | 7.07E-04 |
| 345.97074 | 50.21  | 15.70 | 15.28 | 15.23 | 15.46 | 5.90E-01 | 6.81E-01 | 5.88E-01 | 9.26E-01 | 9.99E-01 | 9.69E-01 | 9.36E-01 |
| 345.98234 | 54.98  | 17.22 | 10.80 | 11.39 | 14.63 | 5.20E-66 | 3.65E-14 | 3.65E-14 | 7.38E-14 | 1.60E-01 | 3.65E-14 | 5.85E-14 |

|           |        |       |       |       |       |           |          |          |          |          |          |          |
|-----------|--------|-------|-------|-------|-------|-----------|----------|----------|----------|----------|----------|----------|
| 346.00032 | 43.18  | 19.19 | 20.11 | 20.47 | 20.55 | 2.07E-17  | 4.86E-08 | 1.04E-13 | 8.09E-14 | 1.01E-01 | 3.77E-02 | 9.65E-01 |
| 346.03545 | 276.21 | 16.96 | 17.79 | 16.25 | 16.01 | 3.28E-05  | 1.15E-01 | 2.25E-01 | 6.88E-02 | 4.27E-04 | 6.35E-05 | 9.32E-01 |
| 346.04696 | 67.67  | 22.82 | 24.00 | 23.88 | 22.93 | 5.57E-07  | 2.69E-05 | 1.69E-04 | 9.72E-01 | 9.68E-01 | 4.65E-04 | 2.18E-03 |
| 346.06052 | 87.67  | 16.10 | 18.01 | 16.69 | 16.78 | 4.38E-08  | 8.23E-09 | 1.97E-01 | 1.30E-01 | 1.78E-04 | 8.65E-04 | 9.94E-01 |
| 346.08146 | 88.33  | 14.55 | 16.87 | 16.56 | 15.90 | 3.86E-12  | 2.13E-11 | 4.13E-09 | 2.52E-04 | 7.79E-01 | 2.08E-02 | 1.88E-01 |
| 346.10895 | 246.4  | 14.27 | 13.71 | 13.66 | 13.20 | 6.67E-03  | 2.21E-01 | 1.58E-01 | 2.66E-03 | 9.99E-01 | 3.69E-01 | 4.45E-01 |
| 346.15362 | 29.99  | 15.25 | 13.36 | 16.70 | 15.89 | 3.38E-20  | 2.65E-08 | 2.15E-05 | 1.80E-01 | 6.89E-14 | 2.21E-12 | 6.28E-02 |
| 346.18359 | 65.24  | 14.89 | 16.14 | 16.55 | 16.10 | 8.53E-06  | 1.33E-03 | 6.14E-06 | 2.71E-03 | 6.22E-01 | 1.00E+00 | 5.77E-01 |
| 346.2516  | 22.52  | 13.13 | 12.77 | 12.77 | 13.73 | 4.30E-03  | 5.85E-01 | 5.76E-01 | 1.54E-01 | 1.00E+00 | 7.50E-03 | 6.83E-03 |
| 346.25904 | 21.95  | 15.65 | 15.93 | 17.51 | 16.82 | 1.61E-19  | 4.91E-01 | 7.26E-14 | 9.50E-08 | 4.49E-13 | 1.20E-04 | 3.96E-03 |
| 346.52956 | 273.07 | 16.35 | 15.85 | 16.86 | 16.05 | 3.07E-04  | 1.32E-01 | 1.36E-01 | 5.90E-01 | 2.04E-04 | 8.36E-01 | 6.68E-03 |
| 346.57002 | 144.37 | 10.52 | 15.33 | 12.62 | 13.74 | 3.20E-15  | 7.41E-14 | 5.80E-04 | 1.04E-07 | 9.61E-06 | 2.82E-02 | 1.97E-01 |
| 346.69391 | 28.06  | 15.31 | 17.79 | 15.58 | 16.66 | 1.04E-09  | 3.89E-09 | 8.99E-01 | 3.99E-03 | 3.14E-07 | 3.00E-02 | 3.76E-02 |
| 346.72299 | 48.22  | 20.22 | 20.23 | 20.11 | 19.67 | 6.04E-02  | 1.00E+00 | 9.58E-01 | 7.39E-02 | 9.47E-01 | 7.67E-02 | 2.30E-01 |
| 346.85598 | 44.13  | 12.30 | 17.92 | 18.92 | 16.64 | 5.95E-39  | 3.65E-14 | 3.65E-14 | 7.39E-14 | 1.03E-01 | 2.56E-02 | 4.43E-06 |
| 346.86253 | 52.47  | 14.52 | 15.38 | 15.82 | 15.98 | 1.45E-05  | 2.75E-02 | 1.64E-04 | 3.60E-05 | 5.05E-01 | 2.58E-01 | 9.60E-01 |
| 346.88836 | 57.26  | 15.82 | 15.14 | 15.86 | 15.44 | 2.41E-01  | 3.10E-01 | 1.00E+00 | 7.73E-01 | 2.87E-01 | 8.94E-01 | 7.37E-01 |
| 346.95169 | 34.69  | 14.92 | 16.56 | 16.36 | 16.43 | 1.91E-06  | 1.23E-05 | 1.35E-04 | 1.18E-04 | 9.39E-01 | 9.81E-01 | 9.98E-01 |
| 346.99777 | 41.19  | 19.50 | 20.52 | 21.47 | 21.20 | 8.86E-32  | 2.54E-10 | 3.65E-14 | 5.16E-14 | 9.92E-09 | 1.12E-04 | 3.10E-01 |
| 347.00478 | 275.43 | 16.36 | 18.20 | 19.04 | 17.67 | 5.28E-24  | 3.73E-13 | 4.05E-14 | 4.32E-07 | 2.10E-03 | 1.25E-01 | 1.79E-07 |
| 347.02534 | 262.14 | 17.51 | 18.21 | 17.99 | 17.74 | 1.60E-02  | 1.13E-02 | 1.40E-01 | 7.54E-01 | 7.75E-01 | 2.00E-01 | 7.13E-01 |
| 347.03452 | 86.5   | 17.66 | 16.34 | 16.72 | 16.49 | 1.44E-06  | 2.93E-06 | 1.58E-03 | 8.02E-05 | 4.46E-01 | 9.37E-01 | 8.23E-01 |
| 347.04383 | 87.02  | 17.63 | 17.97 | 17.70 | 17.03 | 2.61E-06  | 1.64E-01 | 9.72E-01 | 2.14E-03 | 3.78E-01 | 7.64E-07 | 6.30E-04 |
| 347.05039 | 69.77  | 19.61 | 20.64 | 20.57 | 19.56 | 4.08E-07  | 1.17E-04 | 3.17E-04 | 9.95E-01 | 9.93E-01 | 1.20E-04 | 3.09E-04 |
| 347.06307 | 81.66  | 17.39 | 16.95 | 16.89 | 16.82 | 9.85E-02  | 2.87E-01 | 1.75E-01 | 1.19E-01 | 9.95E-01 | 9.63E-01 | 9.95E-01 |
| 347.07457 | 96.86  | 16.61 | 19.05 | 18.29 | 18.33 | 1.54E-26  | 3.72E-14 | 8.24E-14 | 9.20E-14 | 1.24E-03 | 3.35E-03 | 9.99E-01 |
| 347.08596 | 98.71  | 16.13 | 18.09 | 16.75 | 17.47 | 2.22E-18  | 7.62E-14 | 1.12E-02 | 2.63E-09 | 3.05E-09 | 2.28E-02 | 3.76E-03 |
| 347.12127 | 102.03 | 14.40 | 14.02 | 12.82 | 14.83 | 3.14E-10  | 5.29E-01 | 2.27E-07 | 4.33E-01 | 2.34E-04 | 3.31E-02 | 4.23E-10 |
| 347.14214 | 130.93 | 14.80 | 17.47 | 15.68 | 16.87 | 1.35E-28  | 3.70E-14 | 2.20E-04 | 7.27E-14 | 1.93E-13 | 4.01E-02 | 1.63E-06 |
| 347.16743 | 99.68  | 16.11 | 17.16 | 17.31 | 16.73 | 1.05E-13  | 4.10E-10 | 9.01E-13 | 6.31E-04 | 7.86E-01 | 4.14E-02 | 2.25E-03 |
| 347.2231  | 31.99  | 17.90 | 17.09 | 18.01 | 17.85 | 1.71E-02  | 4.27E-02 | 9.85E-01 | 9.98E-01 | 1.95E-02 | 9.47E-02 | 9.57E-01 |
| 347.25946 | 22.91  | 15.84 | 12.53 | 13.15 | 14.55 | 6.49E-19  | 7.48E-14 | 1.02E-12 | 1.83E-03 | 2.97E-01 | 5.63E-07 | 8.71E-04 |
| 347.29413 | 23.63  | 18.89 | 11.57 | 11.73 | 12.54 | 3.02E-60  | 3.65E-14 | 3.65E-14 | 3.65E-14 | 9.74E-01 | 5.46E-02 | 1.37E-01 |
| 347.54891 | 60.52  | 15.60 | 15.96 | 16.26 | 16.44 | 2.69E-03  | 4.05E-01 | 2.20E-02 | 2.50E-03 | 5.82E-01 | 1.97E-01 | 8.72E-01 |
| 347.63863 | 27.3   | 16.68 | 20.59 | 15.90 | 15.94 | 3.31E-114 | 3.65E-14 | 3.83E-11 | 1.61E-09 | 3.65E-14 | 3.65E-14 | 9.81E-01 |
| 347.68281 | 35.2   | 15.65 | 15.45 | 16.91 | 17.42 | 6.91E-09  | 9.33E-01 | 9.66E-04 | 3.02E-06 | 1.61E-04 | 4.17E-07 | 4.70E-01 |
| 347.70179 | 27.52  | 15.69 | 17.96 | 17.63 | 17.93 | 9.12E-21  | 7.52E-14 | 2.87E-13 | 7.38E-14 | 5.27E-01 | 9.99E-01 | 6.34E-01 |
| 347.85547 | 50.36  | 16.02 | 18.14 | 18.38 | 17.84 | 7.17E-46  | 3.65E-14 | 3.65E-14 | 3.67E-14 | 3.34E-01 | 1.80E-01 | 1.58E-03 |
| 347.88346 | 59.98  | 14.82 | 14.77 | 15.59 | 14.93 | 1.89E-01  | 9.99E-01 | 2.43E-01 | 9.94E-01 | 2.12E-01 | 9.81E-01 | 4.33E-01 |
| 347.97046 | 51.59  | 16.30 | 13.39 | 16.02 | 15.88 | 1.38E-09  | 6.08E-09 | 9.27E-01 | 8.07E-01 | 3.18E-07 | 3.28E-06 | 9.91E-01 |
| 348.00176 | 64.08  | 18.23 | 16.84 | 16.77 | 18.30 | 2.29E-05  | 2.79E-03 | 1.31E-03 | 9.98E-01 | 9.98E-01 | 3.17E-03 | 1.57E-03 |
| 348.04452 | 69.33  | 19.39 | 20.40 | 20.27 | 19.28 | 2.48E-06  | 3.33E-04 | 2.13E-03 | 9.72E-01 | 9.56E-01 | 1.52E-04 | 9.52E-04 |
| 348.0701  | 250.76 | 23.39 | 27.02 | 25.78 | 25.05 | 5.73E-17  | 7.45E-14 | 5.96E-09 | 1.52E-04 | 8.66E-03 | 1.11E-05 | 2.65E-01 |
| 348.09022 | 83.09  | 18.92 | 19.82 | 19.74 | 19.80 | 1.57E-05  | 1.23E-04 | 4.98E-04 | 2.90E-04 | 9.82E-01 | 1.00E+00 | 9.93E-01 |
| 348.13968 | 59.61  | 15.49 | 18.36 | 13.30 | 13.90 | 7.06E-28  | 5.10E-11 | 5.00E-07 | 7.23E-04 | 3.72E-14 | 7.05E-14 | 4.91E-01 |
| 348.23132 | 24.09  | 15.02 | 14.13 | 12.95 | 16.91 | 5.46E-19  | 7.76E-02 | 2.31E-07 | 7.37E-06 | 9.84E-03 | 9.42E-11 | 7.36E-14 |
| 348.67309 | 33.94  | 15.52 | 12.67 | 16.80 | 13.74 | 1.95E-29  | 7.41E-14 | 3.35E-04 | 5.18E-07 | 3.67E-14 | 8.60E-03 | 7.43E-14 |
| 348.71699 | 45     | 19.28 | 19.08 | 18.91 | 18.69 | 2.91E-02  | 7.36E-01 | 2.19E-01 | 1.88E-02 | 8.22E-01 | 2.38E-01 | 7.17E-01 |
| 348.72416 | 50.37  | 16.18 | 15.14 | 14.86 | 15.42 | 7.89E-06  | 6.19E-04 | 5.05E-06 | 2.74E-02 | 7.20E-01 | 7.89E-01 | 1.79E-01 |
| 348.81144 | 47.44  | 16.92 | 18.67 | 18.70 | 18.44 | 1.43E-24  | 7.28E-14 | 6.81E-14 | 8.08E-14 | 9.97E-01 | 5.49E-01 | 4.63E-01 |
| 348.83941 | 48.98  | 14.67 | 13.23 | 15.37 | 14.41 | 1.67E-08  | 6.73E-05 | 1.31E-01 | 8.51E-01 | 3.21E-09 | 3.62E-03 | 2.46E-02 |
| 348.85583 | 70.79  | 14.51 | 12.10 | 13.12 | 14.91 | 3.23E-04  | 2.90E-03 | 1.73E-01 | 9.39E-01 | 4.66E-01 | 7.72E-04 | 6.29E-02 |
| 348.86415 | 29.9   | 18.38 | 18.08 | 18.49 | 18.05 | 3.30E-02  | 3.02E-01 | 9.18E-01 | 2.39E-01 | 9.52E-02 | 9.98E-01 | 7.21E-02 |
| 348.88666 | 46.17  | 15.93 | 16.97 | 18.05 | 17.42 | 2.89E-07  | 1.22E-08 | 3.67E-14 | 7.94E-14 | 7.73E-09 | 5.86E-02 | 1.95E-03 |
| 348.93029 | 47.52  | 23.28 | 22.79 | 23.58 | 22.44 | 1.00E-27  | 5.50E-02 | 3.73E-01 | 1.43E-04 | 4.06E-04 | 2.91E-01 | 1.87E-07 |
| 348.93976 | 257.4  | 13.82 | 16.16 | 16.47 | 15.51 | 2.96E-19  | 9.89E-14 | 7.41E-14 | 6.20E-08 | 6.93E-01 | 1.21E-01 | 6.03E-03 |
| 348.93984 | 153.97 | 15.95 | 16.76 | 17.16 | 15.93 | 1.99E-08  | 1.89E-03 | 6.46E-07 | 1.00E+00 | 2.98E-01 | 3.02E-03 | 2.10E-06 |
| 348.96073 | 106.27 | 15.81 | 16.59 | 13.97 | 16.85 | 1.38E-26  | 6.31E-03 | 1.17E-12 | 1.55E-04 | 6.56E-14 | 7.19E-01 | 4.43E-14 |
| 348.9771  | 63.45  | 16.33 | 10.85 | 12.91 | 13.72 | 1.14E-32  | 3.65E-14 | 7.43E-14 | 4.33E-10 | 9.70E-07 | 3.36E-11 | 1.66E-01 |
| 349.00218 | 45.92  | 19.37 | 18.88 | 20.02 | 18.74 | 3.10E-15  | 6.13E-03 | 7.83E-05 | 3.23E-04 | 7.66E-12 | 8.22E-01 | 1.78E-13 |
| 349.03068 | 56.54  | 17.47 | 15.35 | 15.58 | 17.10 | 1.29E-13  | 9.81E-11 | 5.20E-09 | 6.23E-01 | 8.82E-01 | 5.10E-07 | 1.27E-05 |
| 349.05411 | 214.06 | 15.78 | 25.96 | 25.57 | 24.05 | 2.22E-47  | 3.65E-14 | 3.65E-14 | 3.65E-14 | 9.17E-01 | 1.60E-02 | 8.16E-02 |
| 349.06729 | 252.14 | 15.82 | 19.69 | 17.71 | 17.63 | 4.82E-09  | 4.21E-10 | 4.78E-03 | 1.10E-02 | 4.03E-03 | 3.70E-03 | 9.99E-01 |
| 349.0733  | 269.94 | 19.77 | 23.79 | 22.28 | 21.52 | 1.45E-17  | 7.47E-14 | 1.47E-08 | 2.50E-04 | 2.13E-03 | 1.98E-06 | 2.82E-01 |
| 349.09312 | 66.21  | 17.13 | 14.15 | 15.15 | 15.52 | 1.62E-13  | 1.06E-13 | 3.15E-07 | 8.60E-05 | 3.17E-02 | 1.88E-03 | 7.59E-01 |
| 349.11766 | 129.87 | 11.77 | 17.80 | 15.43 | 15.77 | 2.11E-19  | 7.23E-14 | 6.47E-09 | 8.79E-10 | 5.05E-04 | 6.05E-03 | 9.42E-01 |
| 349.13523 | 133.72 | 16.27 | 17.70 | 18.01 | 17.75 | 2.66E-20  | 4.48E-13 | 7.43E-14 | 3.26E-13 | 3.19E-01 | 9.94E-01 | 4.96E-01 |
| 349.17734 | 44.57  | 17.17 | 13.29 | 14.71 | 14.88 | 7.02E-24  | 3.94E-14 | 3.94E-12 | 3.96E-10 | 1.90E-04 | 4.24E-05 | 9.59E-01 |

|           |        |       |       |       |       |          |          |          |          |          |          |          |
|-----------|--------|-------|-------|-------|-------|----------|----------|----------|----------|----------|----------|----------|
| 349.18312 | 43.73  | 17.09 | 11.18 | 11.54 | 14.08 | 4.98E-31 | 3.67E-14 | 3.90E-14 | 1.14E-08 | 8.75E-01 | 9.32E-08 | 2.86E-06 |
| 349.23825 | 27.57  | 14.87 | 12.40 | 11.06 | 16.22 | 6.72E-11 | 4.28E-03 | 1.54E-06 | 2.65E-01 | 2.70E-01 | 7.35E-06 | 5.83E-10 |
| 349.69797 | 30.14  | 15.54 | 19.07 | 19.18 | 15.64 | 5.67E-26 | 7.54E-14 | 7.48E-14 | 9.94E-01 | 9.91E-01 | 9.54E-14 | 7.57E-14 |
| 349.78094 | 292.64 | 15.77 | 16.88 | 16.99 | 15.95 | 4.40E-06 | 4.71E-04 | 7.03E-05 | 9.13E-01 | 9.76E-01 | 9.85E-03 | 2.34E-03 |
| 349.79851 | 49.1   | 18.57 | 11.76 | 12.79 | 12.56 | 2.16E-25 | 5.70E-14 | 7.49E-14 | 7.58E-14 | 3.63E-01 | 6.07E-01 | 9.85E-01 |
| 349.84905 | 43.02  | 13.88 | 15.75 | 13.34 | 15.25 | 3.29E-14 | 2.35E-08 | 2.83E-01 | 1.04E-04 | 2.54E-12 | 4.15E-01 | 5.52E-08 |
| 349.93215 | 51.44  | 18.88 | 18.12 | 19.02 | 17.80 | 1.44E-12 | 6.52E-05 | 8.14E-01 | 1.48E-08 | 2.18E-06 | 2.85E-01 | 3.03E-10 |
| 349.97134 | 119.68 | 14.75 | 14.11 | 14.58 | 14.93 | 3.63E-01 | 4.97E-01 | 9.79E-01 | 9.81E-01 | 7.55E-01 | 3.27E-01 | 8.78E-01 |
| 349.98586 | 54.5   | 17.98 | 18.91 | 18.81 | 18.02 | 6.40E-07 | 4.37E-05 | 3.06E-04 | 9.98E-01 | 9.60E-01 | 2.66E-04 | 1.47E-03 |
| 350.01149 | 39.74  | 14.61 | 11.74 | 15.83 | 13.44 | 6.99E-11 | 2.29E-06 | 1.12E-01 | 1.64E-01 | 3.22E-11 | 1.95E-02 | 2.65E-04 |
| 350.05617 | 203.6  | 16.03 | 21.69 | 21.62 | 20.04 | 4.36E-47 | 3.65E-14 | 3.65E-14 | 4.36E-14 | 9.96E-01 | 3.33E-05 | 6.96E-05 |
| 350.07475 | 240.87 | 15.33 | 20.23 | 19.13 | 17.44 | 1.35E-16 | 7.41E-14 | 9.74E-11 | 1.05E-03 | 1.98E-01 | 1.21E-05 | 1.65E-02 |
| 350.09342 | 79.57  | 14.90 | 15.37 | 14.73 | 15.92 | 5.37E-03 | 5.20E-01 | 9.54E-01 | 2.11E-02 | 2.56E-01 | 4.27E-01 | 5.56E-03 |
| 350.11598 | 295.59 | 14.14 | 14.15 | 14.47 | 13.37 | 4.61E-02 | 1.00E+00 | 8.09E-01 | 1.89E-01 | 8.42E-01 | 1.98E-01 | 2.80E-02 |
| 350.119   | 53.34  | 14.64 | 16.39 | 15.95 | 15.74 | 7.52E-07 | 4.42E-07 | 2.07E-04 | 4.41E-03 | 5.29E-01 | 2.05E-01 | 9.13E-01 |
| 350.1555  | 107.5  | 15.29 | 15.28 | 14.99 | 15.70 | 6.23E-03 | 1.00E+00 | 3.78E-01 | 1.45E-01 | 4.41E-01 | 1.49E-01 | 2.19E-03 |
| 350.17742 | 22.61  | 18.08 | 10.39 | 10.99 | 12.64 | 2.07E-73 | 3.65E-14 | 3.65E-14 | 3.65E-14 | 2.03E-01 | 9.34E-11 | 2.09E-06 |
| 350.23581 | 22.29  | 16.13 | 10.42 | 10.87 | 12.85 | 8.64E-59 | 3.65E-14 | 3.65E-14 | 4.16E-14 | 3.68E-01 | 1.04E-13 | 2.95E-10 |
| 350.64406 | 28.59  | 15.43 | 17.27 | 16.50 | 17.44 | 1.54E-10 | 2.08E-08 | 2.15E-03 | 2.46E-09 | 5.93E-02 | 9.52E-01 | 1.61E-02 |
| 350.71456 | 45.02  | 17.69 | 16.90 | 16.70 | 17.01 | 6.38E-08 | 2.45E-05 | 6.67E-08 | 6.59E-04 | 6.70E-01 | 9.15E-01 | 2.95E-01 |
| 350.80338 | 45.85  | 14.31 | 13.41 | 13.68 | 14.37 | 1.39E-04 | 1.23E-03 | 3.97E-02 | 9.97E-01 | 6.99E-01 | 1.25E-03 | 3.44E-02 |
| 350.81074 | 48.28  | 16.76 | 18.61 | 18.60 | 18.44 | 2.83E-22 | 7.51E-14 | 7.36E-14 | 9.09E-14 | 1.00E+00 | 8.45E-01 | 8.48E-01 |
| 350.83983 | 28.05  | 13.77 | 11.18 | 14.78 | 13.81 | 3.85E-10 | 3.38E-06 | 1.80E-01 | 1.00E+00 | 1.86E-10 | 8.93E-06 | 2.59E-01 |
| 350.85586 | 51.19  | 15.69 | 17.84 | 15.51 | 14.81 | 1.51E-16 | 5.91E-10 | 9.40E-01 | 3.47E-02 | 5.96E-11 | 7.43E-14 | 1.49E-01 |
| 350.86873 | 42.48  | 15.32 | 16.12 | 15.75 | 16.93 | 8.63E-11 | 1.36E-03 | 1.89E-01 | 2.28E-11 | 3.23E-01 | 2.22E-03 | 1.73E-06 |
| 350.89438 | 32.33  | 19.49 | 18.12 | 19.01 | 18.73 | 4.82E-21 | 5.81E-14 | 8.59E-04 | 5.27E-08 | 1.55E-10 | 4.04E-05 | 1.24E-01 |
| 350.92798 | 51.45  | 20.73 | 20.10 | 21.00 | 19.65 | 1.18E-10 | 6.21E-03 | 4.86E-01 | 5.55E-07 | 4.25E-05 | 1.16E-01 | 8.02E-10 |
| 350.97262 | 160.69 | 13.92 | 13.69 | 14.07 | 13.20 | 3.95E-01 | 9.71E-01 | 9.90E-01 | 5.09E-01 | 8.86E-01 | 7.91E-01 | 3.56E-01 |
| 351.02501 | 38.24  | 16.04 | 14.62 | 16.81 | 15.74 | 1.50E-08 | 1.26E-04 | 8.27E-02 | 8.10E-01 | 2.43E-09 | 7.57E-03 | 1.09E-02 |
| 351.05878 | 207.08 | 14.46 | 19.57 | 19.63 | 18.18 | 2.04E-45 | 3.65E-14 | 3.65E-14 | 4.67E-14 | 9.97E-01 | 2.85E-04 | 1.11E-04 |
| 351.07789 | 148.02 | 15.61 | 17.97 | 16.75 | 16.43 | 7.35E-15 | 7.42E-14 | 1.13E-04 | 1.43E-02 | 4.57E-05 | 4.25E-07 | 6.55E-01 |
| 351.0991  | 55.02  | 20.78 | 20.13 | 20.56 | 20.08 | 9.31E-21 | 7.64E-14 | 1.59E-02 | 7.34E-14 | 2.14E-07 | 9.00E-01 | 1.12E-08 |
| 351.09925 | 114.63 | 13.92 | 16.52 | 13.61 | 15.97 | 8.43E-09 | 5.75E-06 | 9.32E-01 | 8.02E-04 | 6.19E-07 | 7.48E-01 | 1.19E-04 |
| 351.11338 | 55.97  | 13.80 | 14.33 | 13.09 | 13.58 | 6.32E-02 | 6.40E-01 | 3.73E-01 | 9.62E-01 | 3.58E-02 | 3.88E-01 | 7.22E-01 |
| 351.15043 | 33.84  | 15.29 | 17.63 | 15.61 | 17.67 | 4.77E-12 | 2.12E-08 | 8.31E-01 | 2.66E-08 | 2.88E-06 | 9.99E-01 | 3.08E-06 |
| 351.15916 | 54.29  | 15.37 | 14.90 | 14.86 | 14.79 | 4.35E-01 | 6.19E-01 | 5.47E-01 | 4.70E-01 | 1.00E+00 | 9.94E-01 | 9.98E-01 |
| 351.19298 | 43.79  | 18.12 | 16.51 | 16.11 | 16.52 | 1.24E-24 | 7.43E-14 | 4.92E-14 | 7.87E-14 | 1.37E-01 | 1.00E+00 | 1.29E-01 |
| 351.2165  | 27.05  | 17.64 | 17.07 | 18.90 | 18.04 | 2.12E-26 | 4.93E-04 | 7.46E-14 | 3.17E-02 | 3.70E-14 | 4.07E-09 | 1.75E-07 |
| 351.22622 | 22.35  | 13.70 | 14.78 | 13.14 | 14.97 | 4.28E-05 | 4.92E-02 | 5.32E-01 | 1.65E-02 | 9.21E-04 | 9.71E-01 | 2.32E-04 |
| 351.23858 | 38.31  | 14.53 | 14.39 | 15.33 | 15.21 | 1.67E-03 | 9.56E-01 | 2.40E-02 | 9.28E-02 | 6.95E-03 | 3.26E-02 | 9.77E-01 |
| 351.28894 | 23.29  | 16.41 | 13.32 | 14.39 | 15.60 | 4.20E-15 | 8.09E-14 | 2.42E-07 | 1.25E-01 | 2.02E-02 | 4.68E-08 | 8.27E-03 |
| 351.56267 | 295.81 | 16.12 | 18.22 | 18.63 | 17.01 | 1.36E-20 | 1.56E-13 | 7.56E-14 | 4.15E-03 | 3.90E-01 | 6.69E-05 | 3.21E-08 |
| 351.65187 | 28.71  | 15.33 | 17.06 | 15.43 | 17.32 | 6.69E-09 | 2.84E-05 | 9.93E-01 | 2.10E-06 | 1.42E-04 | 9.11E-01 | 1.22E-05 |
| 351.79601 | 49.35  | 18.58 | 12.76 | 13.31 | 13.36 | 2.42E-28 | 4.30E-14 | 6.72E-14 | 7.42E-14 | 7.02E-01 | 6.68E-01 | 1.00E+00 |
| 351.89709 | 35.95  | 16.52 | 13.57 | 13.74 | 13.99 | 2.22E-21 | 7.36E-14 | 7.38E-14 | 3.04E-13 | 9.49E-01 | 5.59E-01 | 8.58E-01 |
| 351.91605 | 46.67  | 15.53 | 14.91 | 15.49 | 15.60 | 3.92E-03 | 1.20E-02 | 9.96E-01 | 9.84E-01 | 2.80E-02 | 6.87E-03 | 9.44E-01 |
| 351.93124 | 48.71  | 16.59 | 16.08 | 16.62 | 16.02 | 6.38E-02 | 2.62E-01 | 9.99E-01 | 1.94E-01 | 2.32E-01 | 9.97E-01 | 1.71E-01 |
| 351.96845 | 77.1   | 14.89 | 13.21 | 16.21 | 14.99 | 1.54E-08 | 1.13E-03 | 1.52E-02 | 9.95E-01 | 1.73E-09 | 1.05E-03 | 4.74E-02 |
| 351.98793 | 71.05  | 19.48 | 18.13 | 18.76 | 18.68 | 1.94E-09 | 2.28E-10 | 1.37E-03 | 5.42E-04 | 8.87E-03 | 3.55E-02 | 9.83E-01 |
| 352.05291 | 67.97  | 19.97 | 20.33 | 20.61 | 19.90 | 6.59E-04 | 2.16E-01 | 3.19E-03 | 9.81E-01 | 4.44E-01 | 1.27E-01 | 1.72E-03 |
| 352.0632  | 194.75 | 15.31 | 17.10 | 17.75 | 17.71 | 2.32E-23 | 5.51E-12 | 7.21E-14 | 7.36E-14 | 3.77E-02 | 7.21E-02 | 9.98E-01 |
| 352.10252 | 45.4   | 18.04 | 16.54 | 16.70 | 16.77 | 3.19E-33 | 3.65E-14 | 3.92E-14 | 6.29E-14 | 5.26E-01 | 2.07E-01 | 9.16E-01 |
| 352.19327 | 20.9   | 17.66 | 13.38 | 11.59 | 12.45 | 4.25E-38 | 6.61E-14 | 3.65E-14 | 3.67E-14 | 1.07E-04 | 1.26E-01 | 1.72E-01 |
| 352.22145 | 38.07  | 12.67 | 15.57 | 16.31 | 15.08 | 3.42E-10 | 9.48E-07 | 3.80E-10 | 1.01E-04 | 5.26E-01 | 8.28E-01 | 1.30E-01 |
| 352.23369 | 22.71  | 15.93 | 18.27 | 16.33 | 17.90 | 7.28E-16 | 5.40E-13 | 5.16E-01 | 2.57E-09 | 3.84E-09 | 6.25E-01 | 4.50E-06 |
| 352.33925 | 194.43 | 22.11 | 20.60 | 20.70 | 21.66 | 1.64E-08 | 4.57E-07 | 2.13E-06 | 3.59E-01 | 9.85E-01 | 1.75E-03 | 5.22E-03 |
| 352.65975 | 28.43  | 14.99 | 17.28 | 16.44 | 17.87 | 5.65E-14 | 1.56E-09 | 2.03E-04 | 2.57E-13 | 8.36E-02 | 3.66E-01 | 5.74E-04 |
| 352.69419 | 26.8   | 15.52 | 17.93 | 15.36 | 15.98 | 1.13E-10 | 5.74E-09 | 9.71E-01 | 6.38E-01 | 1.22E-09 | 1.15E-05 | 3.96E-01 |
| 352.73557 | 22.51  | 15.35 | 16.78 | 14.99 | 16.61 | 1.96E-08 | 8.95E-05 | 6.81E-01 | 1.11E-03 | 1.04E-06 | 9.58E-01 | 2.13E-05 |
| 352.80782 | 48.15  | 16.06 | 16.75 | 16.70 | 16.86 | 2.72E-09 | 1.07E-06 | 5.43E-06 | 3.05E-08 | 9.82E-01 | 8.51E-01 | 6.39E-01 |
| 352.85266 | 58.47  | 15.03 | 14.61 | 14.80 | 14.33 | 4.21E-01 | 7.48E-01 | 9.43E-01 | 3.55E-01 | 9.72E-01 | 9.16E-01 | 7.03E-01 |
| 352.86566 | 19.88  | 15.24 | 13.54 | 14.04 | 14.59 | 3.83E-07 | 2.24E-07 | 3.77E-04 | 1.49E-01 | 3.64E-01 | 5.60E-03 | 2.92E-01 |
| 352.89619 | 47.47  | 17.33 | 17.94 | 18.61 | 18.65 | 4.50E-11 | 1.23E-02 | 3.09E-09 | 3.94E-09 | 6.54E-03 | 5.19E-03 | 9.98E-01 |
| 352.90736 | 43.95  | 15.64 | 17.14 | 16.92 | 16.73 | 5.42E-27 | 3.92E-14 | 7.29E-14 | 1.05E-13 | 3.24E-01 | 1.10E-02 | 4.50E-01 |
| 352.92426 | 51.66  | 17.09 | 15.50 | 15.60 | 14.89 | 1.00E-05 | 1.60E-03 | 3.25E-03 | 7.20E-06 | 9.96E-01 | 5.30E-01 | 3.88E-01 |
| 352.98936 | 43.89  | 16.65 | 17.79 | 17.88 | 18.07 | 3.70E-14 | 6.45E-09 | 2.42E-10 | 2.62E-12 | 9.59E-01 | 4.66E-01 | 7.62E-01 |
| 353.01346 | 52.68  | 14.06 | 13.81 | 12.01 | 12.66 | 2.26E-07 | 9.21E-01 | 1.14E-06 | 2.61E-03 | 4.50E-05 | 2.49E-02 | 3.80E-01 |
| 353.01497 | 284.36 | 17.15 | 16.29 | 15.58 | 16.94 | 6.72E-06 | 3.88E-02 | 7.87E-06 | 9.23E-01 | 1.30E-01 | 2.19E-01 | 3.66E-04 |

|           |        |       |       |       |       |          |          |          |          |          |          |          |
|-----------|--------|-------|-------|-------|-------|----------|----------|----------|----------|----------|----------|----------|
| 353.03878 | 54.88  | 17.32 | 16.48 | 18.41 | 17.50 | 5.08E-12 | 2.44E-03 | 2.95E-05 | 8.72E-01 | 4.58E-13 | 3.22E-04 | 1.71E-03 |
| 353.05558 | 71.59  | 17.40 | 16.77 | 16.56 | 16.52 | 8.64E-03 | 1.23E-01 | 1.87E-02 | 1.55E-02 | 9.01E-01 | 8.42E-01 | 9.99E-01 |
| 353.06641 | 201.2  | 15.96 | 17.14 | 17.55 | 17.71 | 1.35E-13 | 1.90E-06 | 9.05E-11 | 5.59E-12 | 3.07E-01 | 8.57E-02 | 8.98E-01 |
| 353.09158 | 250.93 | 19.59 | 20.91 | 21.41 | 20.06 | 2.76E-16 | 7.96E-09 | 7.67E-14 | 1.23E-01 | 9.17E-02 | 9.31E-04 | 2.10E-08 |
| 353.09671 | 49.79  | 16.43 | 11.17 | 12.57 | 13.33 | 6.24E-19 | 7.38E-14 | 1.13E-11 | 1.44E-07 | 4.88E-02 | 7.68E-04 | 5.10E-01 |
| 353.23139 | 27.48  | 22.05 | 20.32 | 21.14 | 21.70 | 1.43E-13 | 1.96E-13 | 1.14E-04 | 3.72E-01 | 1.14E-03 | 1.87E-08 | 5.67E-02 |
| 353.2419  | 22.49  | 16.14 | 18.33 | 16.18 | 18.01 | 3.74E-17 | 2.05E-12 | 9.99E-01 | 4.25E-09 | 1.43E-11 | 7.07E-01 | 1.98E-08 |
| 353.26853 | 196.58 | 17.40 | 11.18 | 13.02 | 12.11 | 5.72E-28 | 3.74E-14 | 7.59E-14 | 7.38E-14 | 2.70E-03 | 3.14E-01 | 3.17E-01 |
| 353.34262 | 286.7  | 19.95 | 18.48 | 18.28 | 19.54 | 2.38E-13 | 6.51E-09 | 2.89E-11 | 3.08E-01 | 8.29E-01 | 1.31E-04 | 2.69E-06 |
| 353.5935  | 250.8  | 17.65 | 18.48 | 19.10 | 18.11 | 4.69E-09 | 1.01E-03 | 1.20E-09 | 1.67E-01 | 3.44E-02 | 3.83E-01 | 1.68E-04 |
| 353.74353 | 22.49  | 15.60 | 17.35 | 15.67 | 17.05 | 3.27E-09 | 5.36E-07 | 9.96E-01 | 7.37E-05 | 3.00E-06 | 8.09E-01 | 2.73E-04 |
| 353.79361 | 48.64  | 17.15 | 12.12 | 12.68 | 13.24 | 2.58E-50 | 3.65E-14 | 3.65E-14 | 3.65E-14 | 1.82E-01 | 7.50E-04 | 2.10E-01 |
| 353.88195 | 50.15  | 18.62 | 16.40 | 17.24 | 15.07 | 5.37E-14 | 7.41E-07 | 3.98E-03 | 8.98E-14 | 1.84E-01 | 1.13E-02 | 4.27E-06 |
| 353.89038 | 50.53  | 16.91 | 19.19 | 19.38 | 18.87 | 1.61E-39 | 3.65E-14 | 3.65E-14 | 4.43E-14 | 6.95E-01 | 2.61E-01 | 2.05E-02 |
| 353.90028 | 45.04  | 15.59 | 16.83 | 15.20 | 16.12 | 2.88E-13 | 1.21E-08 | 1.94E-01 | 5.08E-02 | 4.12E-13 | 4.35E-03 | 9.72E-05 |
| 353.98551 | 35.51  | 15.16 | 14.65 | 15.52 | 15.78 | 1.06E-02 | 4.16E-01 | 7.01E-01 | 2.71E-01 | 5.54E-02 | 8.30E-03 | 8.77E-01 |
| 354.01108 | 66.69  | 17.99 | 17.23 | 17.02 | 17.63 | 6.91E-03 | 5.07E-02 | 6.22E-03 | 6.36E-01 | 9.09E-01 | 5.70E-01 | 2.10E-01 |
| 354.02492 | 76.76  | 16.15 | 17.75 | 15.65 | 17.07 | 6.97E-04 | 1.40E-02 | 7.71E-01 | 3.28E-01 | 7.36E-04 | 6.11E-01 | 5.30E-02 |
| 354.04664 | 60.59  | 16.22 | 15.30 | 16.73 | 15.82 | 2.43E-03 | 6.39E-02 | 5.18E-01 | 7.17E-01 | 1.24E-03 | 5.44E-01 | 9.55E-02 |
| 354.09416 | 249.35 | 15.38 | 14.84 | 15.78 | 14.83 | 2.82E-02 | 4.22E-01 | 6.73E-01 | 4.21E-01 | 5.08E-02 | 1.00E+00 | 5.40E-02 |
| 354.18193 | 149.49 | 10.60 | 14.62 | 14.45 | 14.17 | 6.98E-19 | 7.45E-14 | 8.57E-14 | 3.47E-12 | 9.83E-01 | 7.79E-01 | 9.33E-01 |
| 354.23541 | 26.57  | 19.81 | 17.49 | 18.65 | 19.19 | 1.54E-13 | 1.12E-13 | 2.15E-04 | 1.31E-01 | 3.17E-04 | 1.34E-07 | 2.58E-01 |
| 354.24965 | 22.44  | 15.86 | 18.15 | 15.93 | 17.68 | 1.62E-20 | 7.61E-14 | 9.92E-01 | 3.23E-10 | 1.03E-13 | 3.06E-01 | 3.67E-09 |
| 354.2849  | 172.4  | 16.94 | 14.77 | 15.11 | 15.43 | 3.83E-22 | 7.03E-14 | 7.47E-14 | 7.20E-11 | 3.54E-01 | 1.26E-02 | 4.43E-01 |
| 354.33635 | 159.92 | 17.49 | 14.59 | 14.55 | 15.97 | 6.99E-38 | 3.65E-14 | 3.65E-14 | 6.45E-11 | 9.96E-01 | 1.06E-08 | 2.37E-09 |
| 354.34627 | 168.09 | 16.68 | 12.85 | 12.19 | 14.84 | 2.98E-20 | 1.13E-13 | 7.32E-14 | 6.89E-04 | 4.90E-01 | 3.14E-04 | 5.25E-07 |
| 354.65522 | 28.2   | 15.14 | 17.94 | 17.11 | 17.27 | 5.07E-13 | 7.63E-13 | 3.53E-07 | 9.96E-08 | 1.00E-01 | 2.76E-01 | 9.73E-01 |
| 354.69067 | 31.3   | 16.09 | 17.92 | 17.32 | 17.67 | 3.49E-20 | 7.52E-14 | 5.39E-10 | 1.09E-13 | 9.00E-03 | 5.55E-01 | 2.86E-01 |
| 354.75452 | 43.69  | 18.31 | 19.14 | 18.98 | 19.07 | 3.76E-07 | 2.04E-06 | 1.41E-04 | 2.73E-05 | 7.72E-01 | 9.76E-01 | 9.54E-01 |
| 354.86612 | 253.35 | 16.36 | 13.89 | 12.23 | 14.95 | 5.55E-10 | 2.42E-04 | 1.35E-10 | 9.40E-02 | 3.39E-02 | 3.31E-01 | 1.11E-04 |
| 354.89302 | 45.59  | 16.48 | 17.78 | 18.66 | 18.50 | 1.49E-44 | 7.64E-14 | 3.65E-14 | 3.65E-14 | 1.76E-09 | 2.06E-06 | 6.64E-01 |
| 354.90768 | 40.43  | 14.29 | 14.55 | 14.61 | 14.47 | 8.54E-01 | 9.05E-01 | 8.40E-01 | 9.68E-01 | 9.99E-01 | 9.97E-01 | 9.87E-01 |
| 354.94579 | 30.46  | 16.98 | 15.75 | 15.52 | 15.42 | 2.60E-12 | 2.89E-07 | 7.91E-10 | 2.50E-10 | 7.47E-01 | 5.05E-01 | 9.74E-01 |
| 354.96865 | 178.7  | 12.73 | 13.71 | 13.13 | 11.65 | 7.57E-06 | 4.28E-02 | 7.03E-01 | 2.76E-02 | 4.14E-01 | 2.42E-06 | 1.22E-03 |
| 354.98505 | 51.98  | 17.39 | 17.12 | 17.80 | 17.08 | 4.65E-05 | 3.28E-01 | 4.71E-02 | 2.31E-01 | 2.42E-04 | 9.95E-01 | 1.38E-04 |
| 354.99478 | 60.88  | 19.43 | 18.44 | 19.89 | 18.71 | 7.39E-09 | 1.83E-04 | 1.96E-01 | 1.63E-02 | 3.26E-08 | 6.80E-01 | 1.75E-05 |
| 355.03773 | 297.81 | 11.07 | 14.56 | 14.56 | 11.37 | 4.85E-16 | 7.50E-11 | 4.91E-11 | 9.28E-01 | 1.00E+00 | 2.05E-08 | 1.52E-08 |
| 355.05667 | 67.41  | 16.80 | 13.54 | 12.20 | 13.07 | 2.76E-16 | 1.11E-08 | 7.54E-14 | 1.88E-10 | 5.92E-02 | 8.27E-01 | 3.82E-01 |
| 355.07314 | 224.02 | 16.95 | 22.51 | 23.06 | 21.02 | 2.38E-40 | 3.65E-14 | 3.65E-14 | 7.36E-14 | 5.19E-01 | 2.34E-03 | 8.65E-06 |
| 355.11042 | 59.07  | 16.75 | 17.80 | 18.12 | 17.88 | 3.42E-12 | 2.67E-07 | 1.48E-11 | 6.95E-08 | 3.56E-01 | 9.79E-01 | 6.23E-01 |
| 355.15504 | 53.54  | 16.85 | 17.32 | 16.64 | 17.17 | 1.06E-02 | 1.29E-01 | 7.35E-01 | 4.90E-01 | 1.06E-02 | 8.99E-01 | 8.97E-02 |
| 355.19378 | 32.43  | 14.45 | 16.60 | 14.70 | 17.28 | 2.57E-11 | 5.94E-06 | 9.36E-01 | 4.09E-09 | 1.23E-04 | 4.38E-01 | 1.71E-07 |
| 355.23819 | 26.32  | 15.48 | 11.39 | 13.95 | 15.14 | 1.80E-15 | 8.28E-14 | 7.27E-03 | 9.00E-01 | 2.06E-06 | 1.22E-11 | 8.20E-02 |
| 355.24849 | 23.43  | 16.63 | 14.08 | 14.96 | 14.86 | 4.51E-25 | 3.87E-14 | 5.38E-13 | 2.35E-13 | 3.91E-04 | 3.19E-03 | 9.72E-01 |
| 355.25776 | 22.56  | 15.01 | 16.66 | 14.88 | 15.75 | 9.88E-07 | 1.23E-05 | 9.80E-01 | 1.43E-01 | 3.70E-06 | 5.84E-02 | 6.94E-02 |
| 355.28381 | 24.13  | 20.76 | 18.30 | 17.96 | 18.32 | 3.02E-41 | 3.65E-14 | 3.65E-14 | 3.65E-14 | 2.64E-01 | 1.00E+00 | 2.34E-01 |
| 355.28426 | 159    | 20.58 | 18.44 | 18.76 | 20.31 | 1.50E-03 | 5.48E-03 | 2.43E-02 | 9.76E-01 | 9.60E-01 | 3.27E-02 | 1.04E-01 |
| 355.53012 | 157.81 | 12.42 | 14.18 | 13.24 | 12.20 | 3.24E-03 | 9.79E-03 | 4.46E-01 | 9.80E-01 | 3.58E-01 | 5.13E-03 | 2.84E-01 |
| 355.63614 | 30.07  | 15.67 | 14.23 | 17.05 | 17.00 | 9.91E-33 | 4.04E-10 | 1.46E-09 | 1.84E-08 | 3.65E-14 | 3.72E-14 | 9.96E-01 |
| 355.66329 | 35.41  | 17.57 | 16.48 | 18.44 | 16.60 | 4.78E-26 | 4.77E-09 | 2.63E-06 | 5.66E-07 | 5.07E-14 | 8.90E-01 | 7.14E-14 |
| 355.7592  | 22.51  | 13.82 | 15.52 | 12.30 | 14.96 | 3.99E-17 | 7.46E-06 | 7.18E-05 | 7.20E-03 | 7.25E-14 | 4.07E-01 | 1.69E-11 |
| 355.85466 | 29.27  | 15.99 | 17.95 | 16.48 | 18.18 | 4.58E-15 | 2.68E-10 | 3.04E-01 | 6.42E-12 | 4.69E-06 | 8.63E-01 | 1.79E-07 |
| 355.87854 | 46.45  | 17.89 | 16.28 | 16.27 | 16.12 | 1.14E-15 | 3.01E-11 | 1.51E-11 | 1.42E-12 | 1.00E+00 | 9.07E-01 | 9.20E-01 |
| 355.88746 | 50.44  | 16.18 | 18.55 | 18.77 | 18.25 | 2.10E-32 | 3.96E-14 | 3.65E-14 | 7.27E-14 | 6.98E-01 | 4.99E-01 | 6.67E-02 |
| 355.93194 | 48.96  | 15.62 | 16.40 | 16.88 | 15.78 | 6.43E-07 | 6.40E-03 | 1.49E-06 | 9.16E-01 | 2.15E-01 | 6.65E-02 | 1.04E-04 |
| 355.98068 | 33.89  | 17.34 | 13.58 | 14.49 | 14.96 | 6.19E-21 | 6.92E-14 | 2.74E-13 | 2.54E-09 | 6.46E-02 | 1.75E-03 | 5.84E-01 |
| 355.99665 | 72.97  | 15.99 | 14.78 | 17.15 | 16.23 | 1.72E-14 | 3.04E-05 | 6.55E-05 | 7.97E-01 | 7.63E-14 | 1.67E-06 | 5.25E-03 |
| 356.02243 | 179.82 | 7.42  | 15.32 | 14.95 | 12.56 | 5.66E-41 | 3.65E-14 | 3.65E-14 | 7.47E-14 | 9.00E-01 | 4.71E-06 | 7.94E-05 |
| 356.05798 | 198.78 | 14.54 | 17.60 | 17.59 | 17.90 | 6.59E-20 | 9.80E-14 | 9.25E-14 | 7.42E-14 | 1.00E+00 | 8.61E-01 | 8.44E-01 |
| 356.06888 | 53.72  | 17.55 | 16.71 | 16.85 | 15.81 | 2.83E-06 | 3.12E-02 | 9.54E-02 | 4.31E-07 | 9.70E-01 | 2.89E-02 | 7.14E-03 |
| 356.07734 | 237.52 | 13.29 | 18.65 | 19.35 | 18.11 | 1.01E-42 | 3.65E-14 | 3.65E-14 | 3.72E-14 | 2.64E-01 | 5.28E-01 | 1.00E-02 |
| 356.11359 | 64.68  | 16.19 | 15.50 | 15.18 | 15.80 | 3.18E-03 | 6.34E-02 | 1.72E-03 | 5.14E-01 | 6.82E-01 | 7.38E-01 | 1.52E-01 |
| 356.12491 | 63.14  | 14.98 | 11.72 | 13.79 | 16.79 | 7.96E-58 | 3.65E-14 | 2.92E-07 | 1.30E-13 | 7.52E-14 | 3.65E-14 | 3.65E-14 |
| 356.16477 | 34.91  | 15.57 | 11.29 | 16.69 | 14.43 | 7.55E-34 | 4.12E-14 | 1.05E-02 | 1.30E-02 | 3.65E-14 | 2.13E-13 | 6.20E-08 |
| 356.19011 | 34.7   | 7.95  | 15.19 | 13.92 | 16.47 | 1.30E-19 | 1.03E-13 | 1.76E-10 | 7.45E-14 | 4.71E-01 | 5.03E-01 | 2.67E-02 |
| 356.24292 | 23.79  | 16.69 | 16.79 | 16.14 | 15.83 | 4.48E-04 | 9.76E-01 | 1.09E-01 | 4.04E-03 | 4.88E-02 | 1.47E-03 | 6.21E-01 |
| 356.26161 | 22.68  | 15.36 | 13.37 | 14.29 | 14.05 | 8.43E-09 | 1.70E-09 | 2.27E-03 | 1.99E-04 | 1.68E-02 | 1.43E-01 | 8.78E-01 |
| 356.27933 | 23.29  | 17.87 | 17.16 | 17.42 | 17.95 | 6.90E-04 | 4.24E-03 | 1.24E-01 | 9.85E-01 | 6.32E-01 | 2.52E-03 | 7.47E-02 |

|           |        |       |       |       |       |           |          |          |          |          |          |          |
|-----------|--------|-------|-------|-------|-------|-----------|----------|----------|----------|----------|----------|----------|
| 356.28704 | 22.74  | 18.69 | 14.29 | 14.79 | 15.19 | 8.03E-63  | 3.65E-14 | 3.65E-14 | 3.65E-14 | 6.64E-02 | 1.46E-04 | 2.20E-01 |
| 356.28762 | 155.74 | 19.84 | 18.69 | 18.89 | 18.73 | 5.82E-06  | 3.29E-05 | 7.61E-04 | 1.10E-04 | 8.62E-01 | 9.99E-01 | 9.30E-01 |
| 356.52664 | 27.28  | 15.62 | 19.81 | 18.35 | 19.62 | 2.72E-59  | 3.65E-14 | 3.65E-14 | 3.65E-14 | 5.86E-11 | 8.08E-01 | 2.59E-08 |
| 356.74864 | 44.76  | 17.75 | 18.23 | 18.03 | 17.94 | 2.33E-02  | 1.14E-02 | 2.64E-01 | 6.26E-01 | 5.85E-01 | 2.92E-01 | 9.47E-01 |
| 356.75592 | 47.53  | 17.07 | 18.17 | 18.13 | 17.89 | 7.03E-14  | 6.30E-12 | 2.22E-11 | 7.75E-07 | 9.93E-01 | 2.51E-01 | 3.78E-01 |
| 356.80032 | 46.31  | 15.45 | 14.94 | 15.43 | 14.60 | 6.17E-03  | 2.28E-01 | 1.00E+00 | 1.16E-02 | 2.92E-01 | 6.25E-01 | 1.90E-02 |
| 356.86072 | 25.49  | 12.34 | 19.09 | 18.12 | 18.21 | 1.11E-42  | 3.65E-14 | 3.65E-14 | 3.65E-14 | 1.16E-01 | 2.05E-01 | 9.97E-01 |
| 356.89144 | 47.64  | 14.87 | 13.86 | 15.88 | 15.44 | 3.66E-11  | 1.24E-03 | 1.07E-03 | 1.68E-01 | 2.35E-11 | 4.80E-07 | 4.00E-01 |
| 356.90898 | 27.96  | 16.33 | 9.06  | 10.23 | 10.55 | 2.73E-53  | 3.65E-14 | 3.65E-14 | 3.65E-14 | 1.20E-02 | 1.06E-03 | 8.45E-01 |
| 356.94443 | 23.6   | 14.25 | 13.11 | 11.97 | 11.93 | 7.15E-06  | 1.07E-01 | 4.22E-05 | 5.95E-05 | 1.19E-01 | 1.18E-01 | 1.00E+00 |
| 356.95329 | 68.18  | 17.51 | 16.19 | 16.70 | 16.48 | 1.48E-06  | 9.76E-07 | 5.10E-03 | 3.19E-04 | 1.78E-01 | 6.76E-01 | 8.29E-01 |
| 356.98462 | 51.68  | 18.06 | 15.76 | 16.27 | 16.24 | 6.11E-18  | 7.28E-14 | 2.60E-11 | 5.29E-11 | 1.85E-01 | 2.67E-01 | 9.99E-01 |
| 356.99244 | 58.45  | 16.44 | 14.78 | 16.44 | 15.69 | 3.75E-04  | 8.16E-04 | 1.00E+00 | 3.19E-01 | 1.15E-03 | 1.93E-01 | 3.39E-01 |
| 357.04473 | 68.79  | 15.83 | 14.40 | 16.06 | 15.27 | 1.99E-03  | 8.42E-03 | 9.56E-01 | 6.21E-01 | 2.02E-03 | 2.52E-01 | 3.43E-01 |
| 357.05537 | 290.02 | 16.39 | 16.83 | 17.19 | 16.57 | 5.92E-06  | 2.76E-02 | 3.35E-06 | 7.03E-01 | 1.15E-01 | 3.77E-01 | 1.03E-03 |
| 357.06976 | 45.45  | 9.77  | 9.29  | 12.11 | 10.94 | 2.14E-06  | 8.14E-01 | 1.01E-04 | 1.48E-01 | 4.08E-06 | 2.15E-02 | 1.67E-01 |
| 357.07008 | 235.7  | 12.38 | 18.42 | 18.93 | 16.96 | 1.02E-36  | 3.65E-14 | 3.65E-14 | 7.49E-14 | 6.87E-01 | 1.45E-02 | 2.96E-04 |
| 357.08238 | 93.47  | 17.33 | 19.48 | 20.06 | 18.62 | 6.05E-34  | 5.12E-14 | 3.65E-14 | 1.89E-09 | 1.62E-02 | 1.87E-04 | 5.56E-11 |
| 357.1224  | 76.21  | 15.39 | 15.28 | 15.81 | 15.48 | 4.68E-01  | 9.88E-01 | 6.00E-01 | 9.93E-01 | 4.27E-01 | 9.42E-01 | 7.97E-01 |
| 357.15068 | 24.1   | 18.54 | 11.07 | 11.97 | 14.29 | 3.57E-64  | 3.65E-14 | 3.65E-14 | 3.67E-14 | 3.58E-02 | 7.52E-14 | 4.17E-10 |
| 357.17447 | 26.91  | 15.95 | 21.62 | 16.80 | 16.34 | 4.32E-34  | 3.65E-14 | 1.57E-01 | 7.92E-01 | 4.65E-14 | 3.76E-14 | 7.05E-01 |
| 357.21279 | 50.8   | 17.82 | 16.72 | 17.12 | 17.17 | 1.97E-05  | 5.61E-06 | 7.05E-03 | 2.09E-02 | 2.88E-01 | 2.11E-01 | 9.95E-01 |
| 357.24955 | 56.88  | 19.35 | 21.11 | 20.59 | 20.53 | 4.64E-20  | 7.16E-14 | 1.46E-11 | 5.28E-10 | 1.61E-02 | 7.56E-03 | 9.86E-01 |
| 357.28002 | 23.77  | 16.36 | 14.77 | 15.99 | 17.07 | 3.35E-06  | 6.47E-04 | 7.87E-01 | 3.22E-01 | 1.91E-02 | 1.20E-06 | 5.54E-02 |
| 357.29959 | 23.89  | 19.00 | 15.93 | 16.07 | 16.84 | 1.21E-35  | 3.65E-14 | 3.65E-14 | 7.22E-14 | 9.20E-01 | 7.09E-04 | 5.78E-03 |
| 357.29959 | 292.56 | 19.04 | 17.38 | 17.70 | 16.77 | 4.53E-12  | 1.85E-07 | 2.93E-05 | 3.75E-12 | 7.05E-01 | 1.93E-01 | 1.32E-02 |
| 357.29989 | 158.95 | 19.33 | 17.15 | 17.08 | 16.96 | 2.26E-25  | 7.47E-14 | 7.43E-14 | 7.07E-14 | 9.88E-01 | 8.58E-01 | 9.63E-01 |
| 357.67822 | 53.38  | 14.26 | 20.30 | 15.27 | 13.43 | 5.53E-26  | 6.69E-14 | 2.72E-01 | 4.90E-01 | 8.20E-14 | 4.72E-14 | 1.20E-02 |
| 357.86092 | 44.94  | 15.37 | 14.48 | 15.01 | 14.75 | 1.75E-02  | 1.08E-02 | 5.77E-01 | 1.47E-01 | 2.70E-01 | 8.13E-01 | 8.17E-01 |
| 357.87587 | 45.02  | 16.82 | 15.97 | 15.82 | 15.53 | 3.07E-09  | 1.29E-04 | 3.45E-06 | 4.57E-09 | 8.78E-01 | 1.43E-01 | 4.81E-01 |
| 357.88408 | 50.16  | 15.26 | 15.73 | 15.44 | 15.78 | 2.25E-02  | 6.05E-02 | 7.47E-01 | 3.61E-02 | 4.50E-01 | 9.94E-01 | 3.25E-01 |
| 357.93392 | 55.54  | 17.42 | 19.80 | 19.94 | 19.45 | 1.07E-32  | 3.76E-14 | 3.65E-14 | 7.34E-14 | 8.98E-01 | 3.41E-01 | 8.69E-02 |
| 357.96247 | 73.48  | 9.39  | 16.61 | 12.32 | 14.62 | 1.96E-25  | 3.87E-14 | 9.35E-06 | 9.31E-14 | 1.90E-10 | 1.04E-02 | 1.80E-03 |
| 358.02081 | 290.41 | 17.22 | 16.05 | 16.70 | 16.58 | 7.10E-04  | 1.94E-04 | 2.34E-01 | 1.14E-01 | 9.96E-02 | 2.66E-01 | 9.76E-01 |
| 358.02094 | 73.95  | 16.92 | 15.57 | 15.22 | 15.63 | 1.70E-10  | 9.79E-07 | 3.54E-10 | 4.98E-06 | 5.15E-01 | 9.97E-01 | 4.16E-01 |
| 358.03553 | 83.75  | 17.60 | 13.05 | 12.66 | 15.38 | 2.99E-48  | 3.65E-14 | 3.65E-14 | 3.37E-12 | 5.43E-01 | 1.29E-12 | 7.25E-14 |
| 358.07496 | 79.15  | 18.47 | 18.23 | 19.12 | 18.20 | 1.07E-04  | 6.65E-01 | 1.32E-02 | 6.15E-01 | 3.76E-04 | 1.00E+00 | 3.65E-04 |
| 358.12203 | 118.12 | 15.19 | 16.79 | 15.04 | 16.21 | 7.33E-23  | 7.45E-14 | 8.22E-01 | 1.01E-07 | 7.36E-14 | 7.28E-03 | 2.47E-09 |
| 358.13247 | 23.55  | 13.25 | 16.41 | 10.83 | 15.14 | 2.27E-19  | 1.24E-07 | 6.08E-05 | 4.72E-03 | 7.38E-14 | 1.21E-01 | 6.35E-12 |
| 358.18296 | 64.71  | 16.31 | 16.50 | 14.69 | 13.08 | 5.41E-10  | 9.83E-01 | 9.31E-03 | 2.62E-08 | 4.06E-03 | 1.12E-08 | 1.66E-02 |
| 358.25551 | 37.35  | 19.54 | 20.98 | 20.25 | 20.13 | 4.22E-20  | 6.18E-14 | 9.91E-07 | 1.30E-04 | 9.97E-07 | 3.03E-08 | 8.23E-01 |
| 358.29498 | 23.39  | 18.53 | 17.71 | 18.14 | 18.82 | 2.32E-05  | 1.49E-03 | 2.82E-01 | 5.70E-01 | 2.34E-01 | 2.12E-05 | 1.85E-02 |
| 358.30266 | 23.98  | 16.89 | 9.60  | 10.37 | 10.87 | 1.30E-44  | 3.65E-14 | 3.65E-14 | 3.65E-14 | 3.20E-01 | 3.52E-02 | 7.05E-01 |
| 358.51887 | 28.21  | 16.28 | 18.37 | 15.10 | 15.15 | 2.18E-86  | 3.65E-14 | 4.90E-14 | 6.89E-14 | 3.65E-14 | 3.65E-14 | 9.72E-01 |
| 358.59333 | 306.39 | 15.83 | 18.37 | 18.28 | 16.64 | 6.86E-28  | 5.30E-14 | 6.25E-14 | 3.27E-03 | 9.77E-01 | 5.98E-11 | 4.26E-10 |
| 358.73029 | 26.67  | 15.01 | 17.61 | 13.58 | 15.51 | 5.19E-22  | 8.07E-12 | 2.31E-04 | 4.90E-01 | 4.76E-14 | 1.93E-07 | 1.37E-06 |
| 358.74621 | 44.9   | 16.21 | 16.46 | 16.06 | 16.56 | 1.31E-02  | 4.03E-01 | 7.63E-01 | 1.60E-01 | 6.78E-02 | 9.46E-01 | 1.77E-02 |
| 358.75316 | 47.8   | 16.06 | 17.14 | 17.04 | 16.85 | 4.71E-09  | 3.08E-08 | 4.53E-07 | 1.35E-04 | 9.44E-01 | 4.08E-01 | 7.37E-01 |
| 358.77595 | 301.41 | 15.33 | 15.85 | 15.49 | 15.36 | 1.58E-02  | 1.46E-02 | 7.60E-01 | 9.97E-01 | 1.89E-01 | 4.22E-02 | 8.89E-01 |
| 358.79733 | 46.32  | 15.44 | 15.22 | 16.05 | 14.83 | 4.05E-06  | 7.54E-01 | 2.45E-02 | 3.54E-02 | 1.40E-03 | 3.27E-01 | 1.33E-06 |
| 358.83474 | 46.08  | 16.16 | 16.44 | 16.69 | 16.90 | 7.71E-03  | 5.70E-01 | 6.74E-02 | 5.78E-03 | 6.72E-01 | 1.92E-01 | 7.97E-01 |
| 358.84248 | 48.46  | 16.82 | 18.91 | 18.98 | 18.93 | 3.92E-32  | 4.16E-14 | 3.74E-14 | 4.45E-14 | 9.82E-01 | 9.99E-01 | 9.96E-01 |
| 358.85311 | 23.04  | 13.93 | 17.82 | 10.46 | 11.01 | 2.68E-69  | 3.65E-14 | 3.85E-14 | 7.36E-14 | 3.65E-14 | 3.65E-14 | 2.72E-01 |
| 358.93178 | 45.15  | 16.89 | 17.64 | 17.42 | 17.42 | 1.72E-03  | 1.05E-03 | 3.62E-02 | 4.57E-02 | 6.95E-01 | 7.21E-01 | 1.00E+00 |
| 359.15578 | 65.15  | 17.36 | 18.14 | 18.11 | 17.76 | 2.32E-07  | 1.68E-06 | 4.04E-06 | 4.19E-02 | 9.96E-01 | 7.45E-02 | 1.19E-01 |
| 359.16827 | 27.77  | 20.24 | 16.82 | 16.17 | 17.87 | 1.10E-28  | 6.85E-14 | 3.67E-14 | 8.23E-11 | 2.12E-01 | 1.25E-02 | 6.89E-06 |
| 359.18891 | 26.66  | 16.14 | 18.54 | 15.95 | 19.43 | 5.88E-22  | 7.96E-10 | 9.51E-01 | 7.52E-14 | 1.02E-10 | 9.14E-02 | 7.42E-14 |
| 359.23999 | 52.11  | 16.95 | 16.52 | 16.57 | 16.38 | 2.27E-01  | 4.15E-01 | 5.31E-01 | 2.02E-01 | 9.97E-01 | 9.68E-01 | 9.14E-01 |
| 359.2617  | 24.52  | 16.31 | 17.74 | 16.64 | 16.50 | 1.50E-06  | 1.49E-06 | 5.95E-01 | 8.99E-01 | 5.23E-04 | 1.20E-04 | 9.59E-01 |
| 359.29705 | 23.11  | 15.91 | 14.08 | 15.15 | 16.39 | 2.78E-10  | 2.32E-07 | 8.60E-02 | 4.63E-01 | 6.80E-03 | 5.90E-10 | 1.76E-03 |
| 359.31511 | 25.45  | 21.30 | 18.25 | 18.66 | 18.06 | 2.57E-62  | 3.65E-14 | 3.65E-14 | 3.65E-14 | 3.77E-02 | 6.37E-01 | 9.78E-04 |
| 359.31556 | 149.96 | 22.07 | 21.14 | 21.22 | 20.74 | 6.69E-03  | 7.18E-02 | 1.13E-01 | 4.19E-03 | 9.97E-01 | 7.48E-01 | 6.18E-01 |
| 359.63872 | 27.13  | 16.31 | 18.44 | 14.97 | 15.11 | 2.19E-64  | 3.65E-14 | 7.33E-14 | 7.11E-13 | 3.65E-14 | 3.65E-14 | 8.07E-01 |
| 359.68932 | 27     | 17.03 | 19.50 | 16.63 | 16.51 | 1.26E-138 | 3.65E-14 | 2.16E-12 | 7.41E-14 | 3.65E-14 | 3.65E-14 | 1.41E-01 |
| 359.83562 | 50.28  | 17.26 | 20.32 | 20.57 | 19.83 | 1.24E-38  | 3.65E-14 | 3.65E-14 | 5.32E-14 | 7.10E-01 | 1.71E-01 | 1.12E-02 |
| 359.92265 | 103.16 | 16.29 | 20.76 | 20.30 | 19.15 | 2.52E-28  | 3.76E-14 | 5.85E-14 | 4.75E-12 | 6.09E-01 | 2.81E-04 | 1.67E-02 |
| 359.93311 | 47.86  | 15.39 | 14.94 | 15.47 | 15.54 | 5.19E-02  | 1.92E-01 | 9.84E-01 | 9.08E-01 | 1.01E-01 | 5.72E-02 | 9.89E-01 |
| 359.94955 | 92.63  | 16.12 | 21.22 | 21.33 | 20.03 | 5.47E-56  | 3.65E-14 | 3.65E-14 | 3.65E-14 | 9.79E-01 | 2.30E-04 | 3.96E-05 |

|           |        |       |       |       |       |          |          |          |          |          |          |          |
|-----------|--------|-------|-------|-------|-------|----------|----------|----------|----------|----------|----------|----------|
| 359.96218 | 44.92  | 10.68 | 15.19 | 15.77 | 15.04 | 2.09E-20 | 9.31E-14 | 7.41E-14 | 4.59E-13 | 7.11E-01 | 9.93E-01 | 5.60E-01 |
| 359.99597 | 51.13  | 18.23 | 19.50 | 20.15 | 19.69 | 7.57E-20 | 7.27E-10 | 7.29E-14 | 7.40E-12 | 5.19E-03 | 7.93E-01 | 9.22E-02 |
| 360.00955 | 48.11  | 19.49 | 19.69 | 20.12 | 19.64 | 2.98E-03 | 6.61E-01 | 1.49E-03 | 8.14E-01 | 6.79E-02 | 9.96E-01 | 4.41E-02 |
| 360.03669 | 93.39  | 18.41 | 18.05 | 18.70 | 17.96 | 9.19E-05 | 1.44E-01 | 3.04E-01 | 4.86E-02 | 1.17E-03 | 9.60E-01 | 2.39E-04 |
| 360.04587 | 81.98  | 15.22 | 15.43 | 14.22 | 15.43 | 3.81E-05 | 8.73E-01 | 1.82E-03 | 8.82E-01 | 1.67E-04 | 1.00E+00 | 2.58E-04 |
| 360.06057 | 263.75 | 19.28 | 21.87 | 21.30 | 20.17 | 9.15E-27 | 3.90E-14 | 7.47E-14 | 4.42E-04 | 5.04E-02 | 1.49E-11 | 8.25E-06 |
| 360.06278 | 60.86  | 15.96 | 16.45 | 16.68 | 16.50 | 1.58E-01 | 4.46E-01 | 1.25E-01 | 3.88E-01 | 9.05E-01 | 9.99E-01 | 9.52E-01 |
| 360.13976 | 44.58  | 13.86 | 16.65 | 12.50 | 12.17 | 6.67E-18 | 7.75E-08 | 1.99E-02 | 3.05E-03 | 8.34E-14 | 7.55E-14 | 9.07E-01 |
| 360.16998 | 22.23  | 17.86 | 12.24 | 13.04 | 14.02 | 1.26E-60 | 3.65E-14 | 3.65E-14 | 3.65E-14 | 1.30E-02 | 1.80E-09 | 1.73E-03 |
| 360.19051 | 39.52  | 13.69 | 18.23 | 12.05 | 16.30 | 5.10E-30 | 7.41E-14 | 2.45E-03 | 6.82E-07 | 3.65E-14 | 6.13E-04 | 7.78E-14 |
| 360.22165 | 30     | 16.64 | 17.88 | 16.54 | 17.99 | 9.20E-08 | 2.22E-04 | 9.86E-01 | 7.62E-05 | 8.35E-05 | 9.85E-01 | 2.85E-05 |
| 360.23128 | 24.22  | 15.02 | 15.23 | 13.79 | 17.02 | 1.16E-13 | 9.34E-01 | 3.24E-03 | 7.69E-07 | 5.89E-04 | 2.38E-05 | 8.08E-14 |
| 360.2741  | 24.5   | 19.98 | 22.12 | 20.79 | 20.54 | 3.45E-22 | 5.03E-14 | 1.41E-04 | 2.14E-02 | 3.34E-10 | 8.74E-13 | 6.04E-01 |
| 360.31855 | 24.13  | 19.14 | 14.00 | 14.26 | 14.33 | 5.04E-81 | 3.65E-14 | 3.65E-14 | 3.65E-14 | 5.35E-01 | 3.61E-01 | 9.87E-01 |
| 360.31866 | 288.91 | 20.88 | 19.14 | 19.26 | 18.69 | 2.87E-12 | 3.97E-08 | 2.71E-07 | 1.73E-11 | 9.76E-01 | 4.58E-01 | 2.38E-01 |
| 360.31887 | 143.75 | 20.05 | 18.95 | 19.20 | 18.88 | 1.45E-06 | 1.92E-05 | 1.40E-03 | 1.02E-05 | 7.15E-01 | 9.94E-01 | 5.71E-01 |
| 360.58479 | 263.76 | 15.21 | 16.37 | 16.72 | 15.94 | 1.78E-16 | 2.63E-10 | 7.29E-14 | 1.68E-04 | 1.54E-01 | 7.83E-02 | 6.91E-05 |
| 360.62792 | 83.04  | 16.27 | 17.99 | 16.87 | 17.44 | 1.54E-09 | 8.94E-10 | 8.69E-02 | 7.13E-05 | 1.65E-04 | 1.87E-01 | 1.42E-01 |
| 360.68899 | 81.92  | 13.27 | 15.02 | 16.30 | 14.90 | 2.42E-04 | 5.00E-02 | 6.08E-05 | 9.11E-02 | 2.58E-01 | 9.98E-01 | 2.04E-01 |
| 360.70382 | 47.16  | 16.52 | 15.99 | 15.67 | 15.24 | 8.25E-04 | 3.19E-01 | 2.99E-02 | 4.00E-04 | 7.40E-01 | 9.80E-02 | 5.37E-01 |
| 360.79508 | 45.93  | 14.48 | 13.59 | 14.01 | 13.35 | 1.55E-02 | 7.14E-02 | 5.66E-01 | 1.43E-02 | 6.69E-01 | 9.23E-01 | 3.05E-01 |
| 360.83274 | 45.75  | 13.96 | 13.34 | 13.60 | 14.87 | 3.84E-05 | 1.79E-01 | 6.23E-01 | 2.38E-02 | 8.47E-01 | 2.80E-05 | 6.39E-04 |
| 360.8399  | 47.35  | 15.79 | 18.43 | 18.53 | 18.49 | 2.26E-33 | 3.87E-14 | 3.70E-14 | 3.94E-14 | 9.75E-01 | 9.96E-01 | 9.98E-01 |
| 360.90998 | 36.63  | 14.84 | 15.80 | 15.16 | 15.14 | 6.86E-02 | 4.08E-02 | 8.16E-01 | 8.53E-01 | 2.99E-01 | 3.06E-01 | 1.00E+00 |
| 360.92862 | 39.19  | 16.11 | 17.25 | 17.03 | 16.75 | 6.43E-03 | 5.09E-03 | 3.40E-02 | 2.52E-01 | 9.21E-01 | 5.16E-01 | 8.69E-01 |
| 360.95045 | 88.88  | 13.68 | 17.64 | 17.63 | 16.08 | 5.20E-36 | 3.65E-14 | 3.65E-14 | 2.97E-13 | 1.00E+00 | 4.27E-06 | 3.92E-06 |
| 360.99927 | 52.56  | 19.13 | 15.98 | 17.89 | 17.34 | 3.07E-17 | 7.43E-14 | 7.40E-04 | 8.53E-07 | 1.26E-07 | 4.97E-04 | 3.60E-01 |
| 361.01299 | 44.54  | 16.93 | 16.09 | 17.33 | 16.64 | 1.12E-06 | 6.75E-04 | 2.58E-01 | 5.39E-01 | 3.64E-07 | 7.89E-02 | 1.39E-02 |
| 361.06009 | 62.11  | 16.41 | 16.27 | 17.24 | 16.00 | 4.84E-04 | 9.64E-01 | 2.19E-02 | 5.18E-01 | 6.99E-03 | 8.16E-01 | 3.82E-04 |
| 361.06322 | 259.24 | 15.27 | 17.61 | 15.50 | 15.63 | 1.60E-10 | 7.91E-10 | 9.09E-01 | 7.41E-01 | 6.55E-08 | 1.09E-06 | 9.84E-01 |
| 361.07342 | 68.97  | 15.49 | 14.28 | 14.78 | 14.26 | 1.17E-03 | 2.89E-03 | 1.68E-01 | 3.23E-03 | 4.73E-01 | 1.00E+00 | 4.60E-01 |
| 361.13923 | 27.54  | 16.53 | 16.68 | 17.31 | 16.78 | 5.73E-02 | 9.55E-01 | 4.09E-02 | 8.37E-01 | 1.65E-01 | 9.88E-01 | 3.28E-01 |
| 361.16888 | 51.6   | 16.93 | 16.54 | 16.53 | 16.05 | 1.25E-02 | 4.15E-01 | 3.93E-01 | 4.73E-03 | 1.00E+00 | 2.66E-01 | 2.69E-01 |
| 361.18256 | 36.63  | 17.09 | 10.69 | 10.26 | 11.31 | 1.68E-42 | 3.65E-14 | 3.65E-14 | 3.67E-14 | 7.77E-01 | 5.42E-01 | 1.07E-01 |
| 361.27524 | 24.21  | 19.41 | 19.26 | 18.13 | 17.89 | 7.76E-13 | 8.90E-01 | 8.99E-08 | 9.62E-10 | 7.41E-06 | 1.19E-07 | 7.42E-01 |
| 361.65403 | 28.59  | 14.93 | 18.88 | 12.28 | 12.75 | 6.53E-82 | 3.65E-14 | 3.74E-14 | 7.59E-14 | 3.65E-14 | 3.65E-14 | 1.78E-01 |
| 361.69878 | 29.73  | 15.31 | 18.07 | 16.95 | 17.43 | 2.88E-23 | 4.92E-14 | 5.91E-10 | 9.23E-14 | 6.10E-05 | 6.73E-02 | 2.27E-01 |
| 361.82628 | 47.55  | 15.93 | 9.38  | 10.27 | 10.43 | 4.40E-44 | 3.65E-14 | 3.65E-14 | 3.65E-14 | 1.36E-01 | 6.34E-02 | 9.78E-01 |
| 361.83263 | 50.27  | 17.73 | 20.44 | 20.66 | 19.86 | 3.46E-34 | 3.70E-14 | 3.65E-14 | 7.41E-14 | 7.33E-01 | 6.14E-02 | 2.79E-03 |
| 361.94649 | 78.51  | 15.80 | 17.92 | 17.86 | 17.35 | 7.05E-17 | 9.47E-14 | 1.46E-13 | 4.33E-08 | 9.93E-01 | 1.33E-01 | 2.17E-01 |
| 361.95367 | 90.35  | 15.00 | 14.76 | 14.50 | 14.61 | 2.87E-01 | 8.13E-01 | 2.47E-01 | 4.94E-01 | 7.85E-01 | 9.51E-01 | 9.82E-01 |
| 362.00644 | 260.13 | 13.84 | 16.26 | 17.10 | 15.24 | 9.84E-12 | 4.90E-07 | 7.55E-12 | 1.09E-02 | 2.44E-01 | 1.23E-01 | 4.01E-04 |
| 362.03392 | 68.33  | 16.02 | 16.62 | 15.18 | 16.08 | 2.11E-04 | 2.25E-01 | 3.31E-02 | 9.98E-01 | 5.90E-05 | 3.63E-01 | 3.12E-02 |
| 362.11006 | 34.88  | 15.21 | 13.07 | 18.22 | 17.02 | 1.24E-46 | 1.21E-12 | 5.74E-14 | 4.32E-09 | 3.65E-14 | 3.65E-14 | 2.68E-04 |
| 362.16765 | 71.66  | 16.76 | 16.31 | 16.69 | 15.58 | 2.09E-03 | 4.91E-01 | 9.95E-01 | 2.17E-03 | 6.58E-01 | 1.38E-01 | 6.17E-03 |
| 362.20337 | 34.66  | 13.11 | 16.54 | 15.04 | 13.72 | 7.23E-11 | 1.01E-10 | 4.45E-04 | 6.11E-01 | 1.42E-02 | 5.73E-07 | 4.82E-02 |
| 362.23657 | 23.31  | 16.63 | 18.39 | 16.19 | 18.17 | 5.34E-21 | 7.42E-12 | 2.30E-01 | 4.57E-09 | 7.52E-14 | 8.14E-01 | 3.25E-13 |
| 362.27784 | 23.8   | 17.13 | 13.59 | 14.07 | 14.06 | 8.11E-20 | 7.29E-14 | 1.53E-13 | 4.72E-13 | 5.88E-01 | 6.30E-01 | 1.00E+00 |
| 362.61197 | 31.83  | 15.32 | 12.98 | 16.27 | 15.40 | 5.45E-22 | 3.43E-13 | 6.56E-03 | 9.94E-01 | 5.78E-14 | 9.87E-13 | 2.53E-02 |
| 362.70223 | 51.62  | 17.39 | 17.84 | 18.27 | 17.01 | 4.24E-09 | 7.96E-02 | 2.27E-05 | 1.93E-01 | 1.16E-01 | 2.23E-04 | 4.87E-09 |
| 362.83671 | 48.73  | 15.40 | 15.43 | 15.39 | 15.69 | 2.74E-01 | 9.98E-01 | 1.00E+00 | 3.24E-01 | 9.93E-01 | 4.50E-01 | 2.97E-01 |
| 362.92602 | 46.66  | 18.60 | 18.83 | 18.00 | 18.92 | 8.68E-05 | 6.76E-01 | 1.84E-02 | 4.14E-01 | 6.11E-04 | 9.72E-01 | 1.56E-04 |
| 362.95014 | 40.32  | 15.17 | 16.31 | 16.54 | 16.53 | 5.99E-16 | 1.26E-09 | 2.94E-13 | 1.79E-12 | 5.43E-01 | 6.01E-01 | 1.00E+00 |
| 362.9611  | 66.23  | 16.81 | 14.80 | 13.92 | 15.09 | 1.10E-11 | 1.70E-06 | 3.09E-12 | 8.55E-05 | 1.11E-01 | 8.96E-01 | 2.04E-02 |
| 362.98843 | 270.25 | 16.81 | 17.50 | 17.43 | 17.05 | 1.91E-01 | 2.23E-01 | 3.02E-01 | 9.14E-01 | 9.98E-01 | 6.41E-01 | 7.45E-01 |
| 362.99926 | 160.62 | 13.76 | 17.33 | 14.71 | 15.69 | 2.84E-16 | 7.52E-14 | 6.53E-02 | 1.29E-05 | 1.44E-09 | 4.44E-04 | 7.75E-02 |
| 363.01829 | 132.25 | 11.93 | 15.51 | 13.28 | 14.50 | 5.26E-11 | 4.01E-11 | 3.16E-02 | 4.86E-06 | 9.27E-05 | 2.17E-01 | 8.85E-02 |
| 363.0394  | 97.6   | 17.81 | 15.18 | 16.44 | 15.95 | 6.37E-31 | 3.65E-14 | 2.52E-11 | 7.48E-14 | 2.63E-09 | 9.32E-04 | 6.21E-02 |
| 363.04763 | 83.87  | 15.53 | 19.35 | 18.84 | 18.41 | 1.34E-48 | 3.65E-14 | 3.65E-14 | 3.65E-14 | 8.99E-02 | 2.15E-04 | 2.09E-01 |
| 363.1147  | 120.55 | 14.73 | 18.06 | 15.25 | 17.41 | 6.44E-37 | 3.65E-14 | 1.27E-01 | 6.10E-14 | 4.67E-14 | 5.40E-02 | 8.29E-14 |
| 363.15107 | 99.69  | 12.98 | 14.43 | 10.85 | 14.13 | 9.49E-08 | 8.63E-02 | 3.24E-03 | 2.64E-01 | 2.42E-07 | 9.66E-01 | 4.84E-06 |
| 363.16554 | 80.13  | 16.16 | 16.67 | 17.24 | 14.96 | 1.10E-06 | 5.47E-01 | 2.71E-02 | 1.60E-02 | 4.83E-01 | 2.69E-04 | 4.09E-07 |
| 363.17642 | 27.37  | 15.64 | 17.97 | 18.12 | 18.68 | 2.22E-36 | 4.85E-14 | 3.74E-14 | 3.65E-14 | 8.83E-01 | 6.53E-03 | 4.93E-02 |
| 363.25073 | 25.1   | 17.19 | 17.33 | 17.10 | 15.99 | 9.59E-05 | 9.66E-01 | 9.87E-01 | 5.97E-04 | 8.63E-01 | 1.65E-04 | 2.63E-03 |
| 363.67804 | 27.42  | 14.95 | 16.59 | 16.04 | 17.73 | 5.60E-10 | 1.55E-04 | 2.24E-02 | 1.04E-10 | 4.99E-01 | 2.63E-02 | 2.10E-04 |
| 363.71394 | 27.05  | 16.14 | 19.21 | 18.84 | 15.84 | 1.08E-33 | 5.27E-14 | 7.22E-14 | 7.17E-01 | 5.49E-01 | 4.39E-14 | 7.14E-14 |
| 363.82931 | 49.85  | 16.47 | 18.89 | 19.16 | 18.39 | 1.11E-35 | 3.67E-14 | 3.65E-14 | 7.49E-14 | 4.92E-01 | 6.41E-02 | 7.56E-04 |
| 363.91912 | 51.88  | 18.28 | 19.21 | 19.22 | 18.85 | 1.00E-08 | 2.47E-07 | 1.13E-07 | 4.58E-03 | 1.00E+00 | 1.62E-01 | 1.29E-01 |

|           |        |       |       |       |       |           |          |          |          |          |          |          |
|-----------|--------|-------|-------|-------|-------|-----------|----------|----------|----------|----------|----------|----------|
| 363.94502 | 50.41  | 16.50 | 15.62 | 17.16 | 16.13 | 1.58E-05  | 1.85E-02 | 1.13E-01 | 6.14E-01 | 5.38E-06 | 3.81E-01 | 5.83E-03 |
| 364.03954 | 50.83  | 15.89 | 13.70 | 15.76 | 15.00 | 4.20E-07  | 9.05E-07 | 9.86E-01 | 1.35E-01 | 8.23E-06 | 1.48E-02 | 2.79E-01 |
| 364.06505 | 253.1  | 22.75 | 25.94 | 26.42 | 23.68 | 9.80E-27  | 7.27E-14 | 5.12E-14 | 3.08E-02 | 4.92E-01 | 3.33E-09 | 7.42E-13 |
| 364.23207 | 26.22  | 14.46 | 16.02 | 12.76 | 16.50 | 3.15E-17  | 7.80E-04 | 1.70E-04 | 9.16E-06 | 7.64E-13 | 6.77E-01 | 7.49E-14 |
| 364.252   | 23.81  | 16.51 | 17.96 | 17.30 | 17.57 | 1.03E-13  | 1.22E-13 | 3.74E-05 | 5.98E-08 | 1.68E-03 | 1.53E-01 | 4.64E-01 |
| 364.52675 | 27.27  | 15.11 | 19.21 | 17.62 | 18.89 | 8.89E-46  | 3.65E-14 | 6.83E-14 | 3.65E-14 | 2.63E-09 | 5.83E-01 | 4.51E-06 |
| 364.59636 | 294.49 | 14.46 | 17.58 | 17.76 | 15.92 | 9.89E-37  | 3.65E-14 | 3.65E-14 | 3.61E-08 | 8.72E-01 | 1.22E-09 | 1.13E-11 |
| 364.69827 | 50.23  | 16.71 | 16.63 | 16.59 | 16.55 | 8.83E-01  | 9.80E-01 | 9.24E-01 | 8.74E-01 | 9.96E-01 | 9.83E-01 | 9.99E-01 |
| 364.73472 | 23.78  | 11.84 | 14.76 | 10.49 | 14.61 | 6.44E-22  | 8.81E-10 | 1.05E-02 | 1.56E-08 | 7.44E-14 | 9.87E-01 | 7.37E-14 |
| 364.78768 | 47.45  | 16.99 | 18.81 | 18.84 | 18.49 | 9.92E-30  | 4.21E-14 | 3.87E-14 | 7.52E-14 | 9.99E-01 | 2.11E-01 | 1.52E-01 |
| 364.81353 | 47.55  | 14.92 | 13.06 | 15.08 | 14.03 | 1.27E-06  | 1.76E-05 | 9.77E-01 | 1.18E-01 | 4.87E-06 | 8.70E-02 | 5.29E-02 |
| 364.83978 | 40.92  | 17.15 | 17.87 | 17.94 | 17.08 | 1.96E-09  | 3.62E-05 | 3.70E-06 | 9.75E-01 | 9.71E-01 | 1.85E-05 | 2.07E-06 |
| 364.86065 | 38.31  | 16.11 | 18.27 | 17.95 | 18.47 | 4.16E-23  | 7.41E-14 | 1.49E-13 | 7.32E-14 | 4.81E-01 | 8.45E-01 | 1.20E-01 |
| 364.90447 | 122.22 | 15.55 | 15.75 | 10.89 | 16.22 | 1.52E-31  | 9.61E-01 | 4.50E-14 | 3.84E-01 | 4.34E-14 | 7.01E-01 | 3.72E-14 |
| 364.90594 | 34.89  | 22.72 | 20.16 | 21.54 | 20.10 | 8.69E-25  | 7.03E-14 | 1.24E-05 | 7.21E-14 | 5.55E-07 | 9.96E-01 | 3.35E-07 |
| 364.92316 | 40     | 14.03 | 14.92 | 15.24 | 16.21 | 2.52E-05  | 1.54E-01 | 2.08E-02 | 5.84E-06 | 8.74E-01 | 2.17E-02 | 1.32E-01 |
| 364.93451 | 118.39 | 14.84 | 16.08 | 12.94 | 15.97 | 1.12E-15  | 4.80E-03 | 2.81E-06 | 1.60E-02 | 1.33E-13 | 9.92E-01 | 1.31E-12 |
| 364.96709 | 39.23  | 13.18 | 15.08 | 13.97 | 14.75 | 3.35E-05  | 4.02E-05 | 2.11E-01 | 1.40E-03 | 4.65E-02 | 8.80E-01 | 2.74E-01 |
| 364.9769  | 55.68  | 18.30 | 16.66 | 17.07 | 16.37 | 6.96E-09  | 1.36E-06 | 4.23E-04 | 2.30E-08 | 5.60E-01 | 8.03E-01 | 1.30E-01 |
| 365.00188 | 52.87  | 17.87 | 15.66 | 17.27 | 16.80 | 5.61E-18  | 7.32E-14 | 3.48E-02 | 3.08E-05 | 1.32E-10 | 1.41E-05 | 1.93E-01 |
| 365.06235 | 251.7  | 15.21 | 18.65 | 18.84 | 15.06 | 3.31E-26  | 7.56E-14 | 7.29E-14 | 9.80E-01 | 9.63E-01 | 7.82E-14 | 7.25E-14 |
| 365.06779 | 236.81 | 18.90 | 22.07 | 22.66 | 20.61 | 6.76E-37  | 3.70E-14 | 3.65E-14 | 2.06E-09 | 1.07E-01 | 9.04E-07 | 2.96E-12 |
| 365.08575 | 64.51  | 16.76 | 13.98 | 14.06 | 14.12 | 7.15E-10  | 6.21E-08 | 1.21E-07 | 6.23E-07 | 9.98E-01 | 9.92E-01 | 9.99E-01 |
| 365.09762 | 284.28 | 14.26 | 15.88 | 16.24 | 15.63 | 3.07E-11  | 1.12E-07 | 6.26E-11 | 1.73E-05 | 5.99E-01 | 8.25E-01 | 1.62E-01 |
| 365.10567 | 85.38  | 19.26 | 20.26 | 19.58 | 20.05 | 3.11E-05  | 4.37E-05 | 4.53E-01 | 2.80E-03 | 1.35E-02 | 7.99E-01 | 1.70E-01 |
| 365.11234 | 66.64  | 16.60 | 17.96 | 17.90 | 17.87 | 1.29E-11  | 1.97E-09 | 6.64E-09 | 5.35E-08 | 9.93E-01 | 9.74E-01 | 9.98E-01 |
| 365.13575 | 49.62  | 16.79 | 13.57 | 15.28 | 14.47 | 5.67E-12  | 2.53E-12 | 1.80E-03 | 9.02E-07 | 5.06E-04 | 1.81E-01 | 2.51E-01 |
| 365.15727 | 31.59  | 18.55 | 19.21 | 18.70 | 19.73 | 1.61E-09  | 1.43E-03 | 8.12E-01 | 4.70E-09 | 3.02E-02 | 3.55E-02 | 8.07E-07 |
| 365.1986  | 27.22  | 14.04 | 18.51 | 16.14 | 18.08 | 3.10E-28  | 3.83E-14 | 1.74E-07 | 6.69E-14 | 1.02E-08 | 6.85E-01 | 6.43E-06 |
| 365.53306 | 27.48  | 15.57 | 18.37 | 16.18 | 18.00 | 2.97E-16  | 2.25E-13 | 2.73E-01 | 3.46E-10 | 1.45E-08 | 7.31E-01 | 6.05E-06 |
| 365.82692 | 40.52  | 15.56 | 15.57 | 15.47 | 14.96 | 3.23E-02  | 1.00E+00 | 9.81E-01 | 4.36E-02 | 9.75E-01 | 4.75E-02 | 1.20E-01 |
| 365.8709  | 32.22  | 14.96 | 19.18 | 18.54 | 18.77 | 6.98E-35  | 3.65E-14 | 4.21E-14 | 3.87E-14 | 1.85E-01 | 5.96E-01 | 8.94E-01 |
| 365.91607 | 51.22  | 17.08 | 17.61 | 17.64 | 17.52 | 3.48E-03  | 1.16E-02 | 5.93E-03 | 5.95E-02 | 9.98E-01 | 9.62E-01 | 9.12E-01 |
| 365.93085 | 19.43  | 14.78 | 14.71 | 14.36 | 14.95 | 1.26E-01  | 9.89E-01 | 2.92E-01 | 9.05E-01 | 4.99E-01 | 7.75E-01 | 9.42E-02 |
| 365.96002 | 53.86  | 16.97 | 18.03 | 18.43 | 16.81 | 1.70E-08  | 1.49E-03 | 3.23E-06 | 9.52E-01 | 5.19E-01 | 4.65E-04 | 1.08E-06 |
| 365.98385 | 85.86  | 14.32 | 14.88 | 14.89 | 13.90 | 2.39E-01  | 7.22E-01 | 7.02E-01 | 8.71E-01 | 1.00E+00 | 3.12E-01 | 2.93E-01 |
| 366.02476 | 58.06  | 18.70 | 15.48 | 15.39 | 17.46 | 2.00E-24  | 7.36E-14 | 7.12E-14 | 1.21E-03 | 9.93E-01 | 1.01E-07 | 1.96E-08 |
| 366.05697 | 98.08  | 17.39 | 19.06 | 19.02 | 18.26 | 1.47E-05  | 6.79E-05 | 9.00E-05 | 1.05E-01 | 1.00E+00 | 1.82E-01 | 2.15E-01 |
| 366.05891 | 195.59 | 12.09 | 15.18 | 15.56 | 15.49 | 1.05E-16  | 3.52E-11 | 1.56E-13 | 1.53E-12 | 8.12E-01 | 9.02E-01 | 9.98E-01 |
| 366.06962 | 263.18 | 15.96 | 20.09 | 20.54 | 18.53 | 1.54E-38  | 3.65E-14 | 3.65E-14 | 1.69E-13 | 4.75E-01 | 1.42E-05 | 1.00E-08 |
| 366.07083 | 63.77  | 16.75 | 16.54 | 17.19 | 16.75 | 3.14E-04  | 4.85E-01 | 1.41E-02 | 1.00E+00 | 1.33E-04 | 5.32E-01 | 2.38E-02 |
| 366.10878 | 83.21  | 16.43 | 16.20 | 15.50 | 16.50 | 1.16E-03  | 8.34E-01 | 2.95E-03 | 9.92E-01 | 5.13E-02 | 7.08E-01 | 2.25E-03 |
| 366.13742 | 70.9   | 16.29 | 15.54 | 15.07 | 14.88 | 7.45E-03  | 3.02E-01 | 2.48E-02 | 8.79E-03 | 7.22E-01 | 4.75E-01 | 9.73E-01 |
| 366.13897 | 299.5  | 13.44 | 15.88 | 16.18 | 14.82 | 3.51E-15  | 2.60E-11 | 1.31E-13 | 4.12E-04 | 8.07E-01 | 1.60E-02 | 7.45E-04 |
| 366.16029 | 31.28  | 15.82 | 15.06 | 13.89 | 16.25 | 1.93E-09  | 1.37E-01 | 4.71E-07 | 6.24E-01 | 6.98E-03 | 8.21E-03 | 4.92E-09 |
| 366.19215 | 28.54  | 12.58 | 18.07 | 17.59 | 17.33 | 6.41E-38  | 3.65E-14 | 3.65E-14 | 3.83E-14 | 6.07E-01 | 2.67E-01 | 9.22E-01 |
| 366.26368 | 23.17  | 16.52 | 16.23 | 16.17 | 15.72 | 7.39E-02  | 7.44E-01 | 6.10E-01 | 3.96E-02 | 9.97E-01 | 3.57E-01 | 4.64E-01 |
| 366.33644 | 22.45  | 15.30 | 14.41 | 14.20 | 14.33 | 2.34E-03  | 2.79E-02 | 3.32E-03 | 1.68E-02 | 9.22E-01 | 9.95E-01 | 9.82E-01 |
| 366.51903 | 27.85  | 12.22 | 18.95 | 9.45  | 9.81  | 2.68E-146 | 3.65E-14 | 3.65E-14 | 3.65E-14 | 3.65E-14 | 3.65E-14 | 1.08E-01 |
| 366.58471 | 299.47 | 15.72 | 16.92 | 17.37 | 17.05 | 1.43E-12  | 4.94E-07 | 3.50E-12 | 5.67E-08 | 1.93E-01 | 9.47E-01 | 5.04E-01 |
| 366.69484 | 41.43  | 16.00 | 15.96 | 15.92 | 16.38 | 5.45E-01  | 1.00E+00 | 9.95E-01 | 6.73E-01 | 9.99E-01 | 6.36E-01 | 5.41E-01 |
| 366.71558 | 58.69  | 13.30 | 17.21 | 11.50 | 11.97 | 5.62E-26  | 1.93E-13 | 1.07E-03 | 3.59E-02 | 4.25E-14 | 7.19E-14 | 7.88E-01 |
| 366.77746 | 44.68  | 15.64 | 16.90 | 16.55 | 16.72 | 2.13E-13  | 1.60E-12 | 2.50E-07 | 2.91E-09 | 1.52E-01 | 7.24E-01 | 7.45E-01 |
| 366.78471 | 47.49  | 17.21 | 18.96 | 18.99 | 18.69 | 9.34E-36  | 3.65E-14 | 3.65E-14 | 6.07E-14 | 9.95E-01 | 2.25E-01 | 1.34E-01 |
| 366.83556 | 45.92  | 16.47 | 17.15 | 17.33 | 16.47 | 1.21E-08  | 2.23E-04 | 1.10E-06 | 1.00E+00 | 6.87E-01 | 6.32E-04 | 5.52E-06 |
| 366.85804 | 45.44  | 15.16 | 14.25 | 16.15 | 15.28 | 8.62E-08  | 1.16E-02 | 4.71E-03 | 9.78E-01 | 9.68E-09 | 5.86E-03 | 2.83E-02 |
| 366.86809 | 31.45  | 18.57 | 18.66 | 18.68 | 18.22 | 2.56E-04  | 8.50E-01 | 7.28E-01 | 1.00E-02 | 9.97E-01 | 1.00E-03 | 4.01E-04 |
| 366.90198 | 52.77  | 20.57 | 17.78 | 19.15 | 17.55 | 1.60E-22  | 7.52E-14 | 8.49E-06 | 7.25E-14 | 3.90E-05 | 8.80E-01 | 2.11E-06 |
| 366.95007 | 254.05 | 17.75 | 18.62 | 19.09 | 18.23 | 8.90E-05  | 1.62E-02 | 3.77E-05 | 3.71E-01 | 4.09E-01 | 5.90E-01 | 2.97E-02 |
| 367.00364 | 134.53 | 11.29 | 14.11 | 14.61 | 13.48 | 6.75E-10  | 4.25E-07 | 1.44E-09 | 2.10E-04 | 7.63E-01 | 6.41E-01 | 1.44E-01 |
| 367.01974 | 38.98  | 15.28 | 13.39 | 16.49 | 14.73 | 3.15E-15  | 2.56E-07 | 1.68E-03 | 3.73E-01 | 7.43E-14 | 1.08E-03 | 5.60E-06 |
| 367.04347 | 139.58 | 14.69 | 15.65 | 13.86 | 13.30 | 7.63E-06  | 1.36E-01 | 2.45E-01 | 1.42E-02 | 6.78E-04 | 7.37E-06 | 6.24E-01 |
| 367.06195 | 192.85 | 11.50 | 12.42 | 14.35 | 14.88 | 3.02E-08  | 4.02E-01 | 1.21E-05 | 3.84E-07 | 8.75E-03 | 6.09E-04 | 8.21E-01 |
| 367.07311 | 252.47 | 14.22 | 14.24 | 14.86 | 13.17 | 1.13E-04  | 1.00E+00 | 2.45E-01 | 1.58E-02 | 2.89E-01 | 1.89E-02 | 2.76E-05 |
| 367.08656 | 298.36 | 15.56 | 18.26 | 18.31 | 17.55 | 5.41E-32  | 3.72E-14 | 3.67E-14 | 7.58E-14 | 9.97E-01 | 1.11E-02 | 5.33E-03 |
| 367.13936 | 91.9   | 20.82 | 22.22 | 21.78 | 21.35 | 7.94E-09  | 3.89E-09 | 6.94E-05 | 7.78E-02 | 2.01E-01 | 1.21E-03 | 2.43E-01 |
| 367.15043 | 59.29  | 20.93 | 21.57 | 21.55 | 21.16 | 3.97E-12  | 6.58E-10 | 1.51E-09 | 8.53E-02 | 9.97E-01 | 3.36E-04 | 6.38E-04 |
| 367.18309 | 109.75 | 14.94 | 14.44 | 15.71 | 14.96 | 2.76E-04  | 2.77E-01 | 2.85E-02 | 1.00E+00 | 7.67E-05 | 2.94E-01 | 5.22E-02 |

|           |        |       |       |       |       |          |          |          |          |          |          |          |
|-----------|--------|-------|-------|-------|-------|----------|----------|----------|----------|----------|----------|----------|
| 367.19599 | 44.23  | 17.54 | 20.68 | 19.56 | 20.99 | 4.12E-60 | 3.65E-14 | 3.65E-14 | 3.65E-14 | 2.36E-10 | 2.65E-01 | 8.09E-14 |
| 367.24535 | 51.59  | 17.46 | 13.79 | 15.03 | 14.97 | 2.55E-20 | 6.78E-14 | 1.16E-10 | 1.77E-10 | 3.22E-03 | 8.27E-03 | 9.98E-01 |
| 367.26719 | 22.95  | 15.69 | 12.97 | 13.66 | 13.81 | 3.57E-11 | 3.46E-11 | 6.45E-07 | 1.12E-05 | 2.78E-01 | 1.47E-01 | 9.79E-01 |
| 367.33559 | 293.83 | 18.57 | 17.53 | 17.73 | 17.59 | 4.60E-03 | 8.01E-03 | 4.69E-02 | 1.79E-02 | 9.27E-01 | 9.98E-01 | 9.74E-01 |
| 367.3356  | 24.1   | 18.48 | 16.34 | 16.54 | 17.02 | 1.11E-32 | 3.65E-14 | 3.76E-14 | 7.62E-14 | 6.07E-01 | 5.47E-04 | 2.76E-02 |
| 367.33587 | 158.78 | 19.04 | 16.67 | 16.55 | 17.13 | 1.02E-19 | 7.61E-14 | 7.54E-14 | 2.16E-10 | 9.73E-01 | 3.57E-01 | 1.64E-01 |
| 367.46359 | 64.03  | 14.00 | 16.52 | 16.91 | 15.80 | 1.08E-15 | 1.65E-11 | 8.25E-14 | 3.59E-06 | 6.94E-01 | 1.87E-01 | 1.19E-02 |
| 367.53569 | 187.47 | 12.80 | 15.67 | 15.32 | 13.92 | 5.92E-12 | 9.68E-11 | 1.03E-08 | 3.61E-02 | 8.26E-01 | 3.59E-04 | 6.58E-03 |
| 367.58817 | 299.47 | 15.47 | 15.23 | 15.63 | 14.96 | 7.98E-03 | 5.99E-01 | 8.44E-01 | 5.18E-02 | 1.87E-01 | 5.51E-01 | 6.33E-03 |
| 367.7146  | 63.74  | 11.95 | 15.87 | 16.76 | 15.95 | 1.11E-17 | 2.14E-11 | 7.51E-14 | 2.56E-11 | 3.61E-01 | 9.99E-01 | 4.76E-01 |
| 367.8738  | 49.08  | 15.07 | 14.89 | 14.69 | 14.90 | 7.81E-01 | 9.59E-01 | 7.19E-01 | 9.69E-01 | 9.52E-01 | 1.00E+00 | 9.47E-01 |
| 367.88992 | 45.85  | 15.33 | 15.26 | 15.70 | 15.86 | 2.62E-02 | 9.85E-01 | 3.22E-01 | 9.37E-02 | 1.93E-01 | 4.93E-02 | 9.08E-01 |
| 367.90525 | 45.28  | 16.67 | 16.28 | 16.17 | 16.14 | 9.90E-03 | 1.18E-01 | 2.27E-02 | 1.68E-02 | 9.31E-01 | 8.64E-01 | 9.97E-01 |
| 367.94538 | 134.77 | 10.63 | 14.07 | 15.94 | 14.47 | 1.72E-16 | 5.71E-08 | 7.38E-14 | 3.43E-09 | 9.40E-03 | 9.15E-01 | 7.37E-02 |
| 367.96303 | 39.82  | 17.44 | 17.70 | 17.57 | 17.75 | 3.88E-01 | 5.36E-01 | 8.93E-01 | 3.81E-01 | 9.24E-01 | 9.92E-01 | 8.08E-01 |
| 367.99986 | 50.38  | 17.76 | 18.38 | 19.06 | 17.73 | 3.37E-18 | 2.24E-04 | 7.47E-14 | 9.98E-01 | 5.09E-05 | 2.80E-04 | 8.09E-14 |
| 368.02731 | 199.55 | 14.96 | 17.28 | 18.03 | 15.97 | 2.81E-13 | 7.98E-08 | 9.19E-13 | 6.18E-02 | 2.46E-01 | 1.01E-02 | 7.17E-06 |
| 368.14272 | 89.64  | 17.49 | 18.56 | 17.77 | 17.73 | 1.85E-05 | 8.97E-06 | 5.52E-01 | 7.06E-01 | 2.62E-03 | 2.00E-03 | 9.97E-01 |
| 368.15329 | 60.55  | 18.30 | 18.88 | 18.82 | 18.51 | 3.77E-08 | 3.98E-07 | 4.06E-06 | 2.17E-01 | 9.56E-01 | 4.33E-03 | 1.91E-02 |
| 368.19713 | 24.87  | 15.32 | 18.41 | 16.55 | 18.38 | 1.92E-35 | 3.65E-14 | 1.14E-06 | 3.65E-14 | 8.65E-13 | 9.99E-01 | 5.66E-12 |
| 368.24565 | 27.54  | 12.96 | 10.25 | 13.40 | 11.30 | 2.60E-18 | 5.87E-13 | 5.65E-01 | 2.14E-05 | 7.42E-14 | 2.01E-02 | 9.43E-08 |
| 368.25877 | 23.62  | 15.59 | 11.46 | 13.98 | 15.21 | 7.02E-28 | 3.72E-14 | 1.09E-05 | 6.66E-01 | 1.43E-11 | 6.65E-14 | 3.02E-03 |
| 368.2794  | 23.35  | 17.88 | 18.90 | 18.92 | 18.65 | 1.63E-06 | 1.69E-05 | 9.48E-06 | 2.94E-03 | 1.00E+00 | 6.73E-01 | 6.19E-01 |
| 368.339   | 23.48  | 16.68 | 11.77 | 13.29 | 13.24 | 2.33E-26 | 3.72E-14 | 8.24E-14 | 1.00E-13 | 1.26E-03 | 3.18E-03 | 9.99E-01 |
| 368.35222 | 22.55  | 16.33 | 15.32 | 14.95 | 15.21 | 7.45E-05 | 7.27E-03 | 7.24E-05 | 2.87E-03 | 6.56E-01 | 9.85E-01 | 8.66E-01 |
| 368.61646 | 90.33  | 18.75 | 15.78 | 16.01 | 15.78 | 2.27E-16 | 6.07E-13 | 1.44E-11 | 2.12E-12 | 9.35E-01 | 1.00E+00 | 9.43E-01 |
| 368.67131 | 28.64  | 15.39 | 17.63 | 17.14 | 16.28 | 7.50E-10 | 1.30E-09 | 2.17E-06 | 5.20E-02 | 4.84E-01 | 1.10E-03 | 7.39E-02 |
| 368.78074 | 47.09  | 15.46 | 17.53 | 17.45 | 17.25 | 2.27E-31 | 3.72E-14 | 3.92E-14 | 7.27E-14 | 9.61E-01 | 3.90E-01 | 6.78E-01 |
| 368.87015 | 46.27  | 17.73 | 18.80 | 19.28 | 19.19 | 5.17E-28 | 1.75E-13 | 3.90E-14 | 6.03E-14 | 2.49E-03 | 2.59E-02 | 9.24E-01 |
| 368.89894 | 52.26  | 17.77 | 13.79 | 14.53 | 14.10 | 9.37E-40 | 3.65E-14 | 3.72E-14 | 3.65E-14 | 3.44E-02 | 6.82E-01 | 4.15E-01 |
| 368.96163 | 46.22  | 16.89 | 17.82 | 17.73 | 17.77 | 7.51E-10 | 3.08E-08 | 4.97E-07 | 3.83E-07 | 9.39E-01 | 9.89E-01 | 9.95E-01 |
| 368.9869  | 33.89  | 14.95 | 14.27 | 16.29 | 15.49 | 4.40E-07 | 1.98E-01 | 5.78E-04 | 4.25E-01 | 1.61E-07 | 5.22E-03 | 1.14E-01 |
| 369.02566 | 87.28  | 15.88 | 17.48 | 16.42 | 17.29 | 2.41E-05 | 6.49E-05 | 4.11E-01 | 8.98E-04 | 2.15E-02 | 9.54E-01 | 1.01E-01 |
| 369.03251 | 64.18  | 16.34 | 15.87 | 16.21 | 15.40 | 5.70E-04 | 1.76E-01 | 9.40E-01 | 4.88E-04 | 4.75E-01 | 2.09E-01 | 4.78E-03 |
| 369.17609 | 27.39  | 15.49 | 19.43 | 13.89 | 13.71 | 6.13E-68 | 3.65E-14 | 2.27E-10 | 9.37E-12 | 3.65E-14 | 3.65E-14 | 8.72E-01 |
| 369.21082 | 33.05  | 15.27 | 19.12 | 17.39 | 18.78 | 7.00E-29 | 3.72E-14 | 3.49E-10 | 5.83E-14 | 9.06E-07 | 7.30E-01 | 1.84E-04 |
| 369.24972 | 56.43  | 17.81 | 19.56 | 18.95 | 18.99 | 2.36E-18 | 7.29E-14 | 1.89E-09 | 2.30E-09 | 5.12E-03 | 1.33E-02 | 9.98E-01 |
| 369.26335 | 294.2  | 17.23 | 15.10 | 15.58 | 15.19 | 8.06E-08 | 6.51E-07 | 1.64E-04 | 3.88E-06 | 6.12E-01 | 9.96E-01 | 7.65E-01 |
| 369.26359 | 168.6  | 18.46 | 15.13 | 15.22 | 15.51 | 2.90E-40 | 3.65E-14 | 3.65E-14 | 3.67E-14 | 9.78E-01 | 3.96E-01 | 6.32E-01 |
| 369.28239 | 23.25  | 15.67 | 15.70 | 15.97 | 15.67 | 6.81E-01 | 1.00E+00 | 7.04E-01 | 1.00E+00 | 7.83E-01 | 1.00E+00 | 7.53E-01 |
| 369.29965 | 284.34 | 20.77 | 18.61 | 18.29 | 19.15 | 5.03E-12 | 7.54E-09 | 2.22E-11 | 3.54E-05 | 7.94E-01 | 4.43E-01 | 7.92E-02 |
| 369.35117 | 30.98  | 25.64 | 23.56 | 23.59 | 24.08 | 8.11E-49 | 3.65E-14 | 3.65E-14 | 3.67E-14 | 9.92E-01 | 3.31E-04 | 8.62E-04 |
| 369.67857 | 33.88  | 15.72 | 18.45 | 17.21 | 16.67 | 1.26E-20 | 6.21E-14 | 4.22E-08 | 1.63E-03 | 1.57E-05 | 8.71E-10 | 1.62E-01 |
| 369.86311 | 47.49  | 17.65 | 19.42 | 19.68 | 18.97 | 5.48E-23 | 7.45E-14 | 6.41E-14 | 4.84E-10 | 5.36E-01 | 1.22E-01 | 2.65E-03 |
| 369.87114 | 48     | 15.24 | 14.73 | 14.66 | 14.52 | 1.07E-01 | 3.43E-01 | 2.29E-01 | 1.04E-01 | 9.97E-01 | 9.18E-01 | 9.71E-01 |
| 369.88586 | 66.02  | 15.73 | 16.77 | 16.72 | 16.69 | 4.23E-05 | 2.60E-04 | 5.11E-04 | 1.20E-03 | 9.97E-01 | 9.92E-01 | 1.00E+00 |
| 369.96111 | 38.01  | 15.15 | 14.60 | 16.47 | 15.26 | 4.97E-06 | 3.92E-01 | 8.61E-04 | 9.89E-01 | 1.90E-06 | 2.77E-01 | 5.57E-03 |
| 369.98503 | 62.83  | 17.13 | 16.36 | 16.73 | 16.82 | 4.40E-02 | 2.20E-02 | 4.23E-01 | 6.78E-01 | 5.36E-01 | 3.56E-01 | 9.86E-01 |
| 369.99856 | 75.74  | 13.03 | 16.47 | 14.36 | 15.40 | 4.00E-09 | 1.77E-09 | 5.09E-02 | 8.72E-05 | 6.06E-04 | 2.13E-01 | 2.34E-01 |
| 370.02085 | 272.97 | 17.49 | 18.49 | 19.09 | 18.24 | 2.85E-23 | 2.65E-11 | 4.16E-14 | 1.42E-06 | 1.89E-04 | 3.01E-01 | 8.02E-08 |
| 370.02612 | 61.52  | 16.09 | 16.17 | 15.95 | 15.74 | 7.38E-01 | 9.96E-01 | 9.83E-01 | 8.15E-01 | 9.42E-01 | 7.16E-01 | 9.55E-01 |
| 370.0401  | 140.11 | 13.20 | 16.35 | 14.44 | 14.00 | 3.80E-07 | 9.99E-08 | 9.42E-02 | 4.64E-01 | 3.51E-03 | 3.11E-04 | 8.67E-01 |
| 370.05219 | 241.95 | 17.07 | 19.55 | 15.79 | 18.22 | 2.42E-09 | 6.09E-05 | 8.99E-02 | 1.79E-01 | 1.14E-09 | 1.03E-01 | 2.21E-04 |
| 370.06616 | 294.15 | 14.80 | 15.18 | 15.62 | 15.08 | 3.70E-03 | 3.11E-01 | 1.35E-03 | 6.06E-01 | 2.20E-01 | 9.72E-01 | 9.68E-02 |
| 370.0744  | 239.46 | 15.04 | 17.38 | 17.17 | 18.02 | 1.24E-07 | 4.14E-05 | 2.00E-04 | 2.23E-07 | 9.78E-01 | 6.39E-01 | 3.89E-01 |
| 370.17199 | 121.77 | 11.53 | 10.62 | 13.90 | 13.41 | 2.16E-11 | 2.20E-01 | 5.02E-06 | 8.10E-04 | 6.36E-10 | 4.31E-07 | 7.52E-01 |
| 370.18278 | 30.45  | 15.74 | 18.59 | 15.85 | 15.41 | 1.05E-21 | 7.49E-14 | 9.87E-01 | 7.06E-01 | 7.74E-14 | 7.45E-14 | 5.21E-01 |
| 370.19689 | 67.02  | 15.54 | 17.82 | 17.60 | 16.80 | 2.10E-17 | 7.54E-14 | 2.34E-13 | 1.56E-05 | 8.37E-01 | 1.22E-03 | 1.68E-02 |
| 370.21969 | 54.99  | 13.36 | 14.65 | 16.67 | 15.83 | 1.52E-11 | 2.43E-02 | 1.47E-11 | 1.35E-06 | 1.02E-04 | 6.53E-02 | 2.85E-01 |
| 370.2559  | 37.6   | 17.90 | 18.92 | 18.06 | 18.68 | 5.89E-10 | 1.23E-08 | 7.64E-01 | 3.15E-05 | 3.24E-06 | 5.11E-01 | 1.91E-03 |
| 370.29486 | 23.31  | 19.70 | 20.55 | 20.78 | 20.47 | 1.13E-04 | 3.85E-03 | 8.98E-05 | 1.28E-02 | 7.95E-01 | 9.93E-01 | 6.45E-01 |
| 370.30319 | 291.15 | 18.85 | 16.10 | 16.31 | 16.30 | 1.44E-20 | 7.47E-14 | 7.79E-14 | 9.99E-14 | 8.99E-01 | 9.17E-01 | 1.00E+00 |
| 370.35453 | 27.28  | 23.83 | 21.66 | 21.77 | 22.19 | 9.48E-50 | 3.65E-14 | 3.65E-14 | 3.65E-14 | 7.92E-01 | 3.26E-04 | 7.44E-03 |
| 370.35459 | 269.19 | 23.50 | 22.24 | 21.99 | 22.11 | 2.59E-10 | 1.36E-06 | 4.00E-09 | 1.82E-07 | 7.32E-01 | 9.54E-01 | 9.64E-01 |
| 370.68599 | 35.37  | 15.73 | 17.03 | 13.82 | 14.08 | 3.31E-46 | 1.40E-10 | 6.96E-14 | 7.61E-14 | 3.65E-14 | 3.65E-14 | 5.37E-01 |
| 370.73283 | 46.84  | 16.97 | 17.80 | 17.75 | 17.46 | 1.33E-20 | 7.25E-14 | 7.44E-14 | 4.54E-07 | 9.57E-01 | 1.13E-03 | 5.74E-03 |
| 370.75799 | 26.95  | 13.51 | 16.76 | 13.75 | 16.11 | 2.47E-08 | 1.14E-06 | 9.78E-01 | 2.32E-04 | 1.30E-05 | 7.40E-01 | 1.44E-03 |
| 370.83187 | 109.44 | 15.69 | 15.44 | 16.86 | 15.36 | 2.08E-03 | 9.31E-01 | 2.81E-02 | 8.65E-01 | 6.17E-03 | 9.98E-01 | 4.37E-03 |

|           |        |       |       |       |       |           |          |          |          |          |          |          |
|-----------|--------|-------|-------|-------|-------|-----------|----------|----------|----------|----------|----------|----------|
| 370.84057 | 127.56 | 12.63 | 16.27 | 17.01 | 16.51 | 2.74E-25  | 7.52E-14 | 5.30E-14 | 7.48E-14 | 2.56E-01 | 9.40E-01 | 6.14E-01 |
| 370.86818 | 48.91  | 17.00 | 18.27 | 19.05 | 18.72 | 1.81E-59  | 3.65E-14 | 3.65E-14 | 3.65E-14 | 1.71E-13 | 4.83E-05 | 3.99E-03 |
| 370.94674 | 187.18 | 12.11 | 16.76 | 17.03 | 15.33 | 1.18E-39  | 3.65E-14 | 3.65E-14 | 7.53E-14 | 8.53E-01 | 2.64E-04 | 7.59E-06 |
| 370.95844 | 52.43  | 17.13 | 15.58 | 16.15 | 15.97 | 4.74E-12  | 3.17E-12 | 1.13E-05 | 3.84E-07 | 3.14E-02 | 2.64E-01 | 8.29E-01 |
| 370.96882 | 60.58  | 18.73 | 17.69 | 19.22 | 17.86 | 5.59E-12  | 1.27E-05 | 1.06E-01 | 5.86E-04 | 2.32E-10 | 8.72E-01 | 4.28E-08 |
| 370.98309 | 89.53  | 13.63 | 19.32 | 19.10 | 16.73 | 8.68E-28  | 4.32E-14 | 5.07E-14 | 1.74E-08 | 9.73E-01 | 6.86E-06 | 3.83E-05 |
| 371.00947 | 44.25  | 15.34 | 14.73 | 15.39 | 15.31 | 1.86E-01  | 2.59E-01 | 9.98E-01 | 1.00E+00 | 2.09E-01 | 3.50E-01 | 9.95E-01 |
| 371.03602 | 282.05 | 17.70 | 20.66 | 19.69 | 19.91 | 1.14E-15  | 7.56E-14 | 3.92E-08 | 3.69E-09 | 2.45E-02 | 1.46E-01 | 9.22E-01 |
| 371.05563 | 149.68 | 12.91 | 17.82 | 16.01 | 16.13 | 1.73E-12  | 5.02E-13 | 4.21E-06 | 4.00E-06 | 2.32E-02 | 4.96E-02 | 9.98E-01 |
| 371.07719 | 226.32 | 15.97 | 16.91 | 18.81 | 18.64 | 1.22E-10  | 1.53E-01 | 4.43E-09 | 1.15E-07 | 2.58E-04 | 1.78E-03 | 9.82E-01 |
| 371.0874  | 62.66  | 15.32 | 13.46 | 15.41 | 14.84 | 3.54E-08  | 3.93E-07 | 9.94E-01 | 4.92E-01 | 2.23E-07 | 7.02E-04 | 3.70E-01 |
| 371.10113 | 46.28  | 17.98 | 16.53 | 17.28 | 17.24 | 4.32E-09  | 3.88E-10 | 5.41E-03 | 4.00E-03 | 3.39E-03 | 9.55E-03 | 9.97E-01 |
| 371.1126  | 175.68 | 8.90  | 14.75 | 14.24 | 14.75 | 1.50E-37  | 3.65E-14 | 3.67E-14 | 3.65E-14 | 6.59E-01 | 1.00E+00 | 6.66E-01 |
| 371.11316 | 83.35  | 17.60 | 16.45 | 16.71 | 17.35 | 8.34E-10  | 8.47E-09 | 8.98E-06 | 5.51E-01 | 5.07E-01 | 2.82E-05 | 4.82E-03 |
| 371.16748 | 22.1   | 14.80 | 11.66 | 14.61 | 12.53 | 1.14E-34  | 3.65E-14 | 8.53E-01 | 7.56E-14 | 3.87E-14 | 3.73E-03 | 1.46E-13 |
| 371.18692 | 102.93 | 17.17 | 15.00 | 15.88 | 16.10 | 1.18E-15  | 7.41E-14 | 4.01E-07 | 8.08E-05 | 1.72E-03 | 7.47E-05 | 7.92E-01 |
| 371.22607 | 28.54  | 18.36 | 16.38 | 15.32 | 17.04 | 2.36E-23  | 6.16E-12 | 4.19E-14 | 1.07E-05 | 6.56E-04 | 8.14E-02 | 1.28E-08 |
| 371.26429 | 34.2   | 17.36 | 18.64 | 17.61 | 18.65 | 2.48E-14  | 1.85E-10 | 5.00E-01 | 3.15E-10 | 7.05E-07 | 1.00E+00 | 8.94E-07 |
| 371.27894 | 282.08 | 19.87 | 17.20 | 17.22 | 17.51 | 8.37E-21  | 7.44E-14 | 7.32E-14 | 4.80E-13 | 1.00E+00 | 7.44E-01 | 7.70E-01 |
| 371.28003 | 22.29  | 18.19 | 13.54 | 14.77 | 15.51 | 1.00E-57  | 3.65E-14 | 3.65E-14 | 3.70E-14 | 1.81E-07 | 7.65E-14 | 4.72E-03 |
| 371.29835 | 23.08  | 16.36 | 17.83 | 18.23 | 18.10 | 2.28E-13  | 7.91E-08 | 7.13E-12 | 6.84E-10 | 4.21E-01 | 7.57E-01 | 9.59E-01 |
| 371.33032 | 294.29 | 17.21 | 15.32 | 15.70 | 14.07 | 3.67E-12  | 9.70E-06 | 5.75E-04 | 5.55E-13 | 7.62E-01 | 1.24E-02 | 3.95E-04 |
| 371.3579  | 26.35  | 20.86 | 18.41 | 18.70 | 19.00 | 2.90E-53  | 3.65E-14 | 3.65E-14 | 3.65E-14 | 1.14E-01 | 9.46E-05 | 1.12E-01 |
| 371.35827 | 156.9  | 19.54 | 17.21 | 17.31 | 17.56 | 4.15E-40  | 3.65E-14 | 3.65E-14 | 3.76E-14 | 9.32E-01 | 1.46E-01 | 4.00E-01 |
| 371.42514 | 304.78 | 14.71 | 14.94 | 14.90 | 14.81 | 6.09E-01  | 5.92E-01 | 7.40E-01 | 9.59E-01 | 9.95E-01 | 8.96E-01 | 9.65E-01 |
| 371.60419 | 282.04 | 18.45 | 23.66 | 24.77 | 23.11 | 1.29E-63  | 3.65E-14 | 3.65E-14 | 3.65E-14 | 5.94E-04 | 2.31E-01 | 1.56E-07 |
| 371.69393 | 41.74  | 13.59 | 17.72 | 11.47 | 11.51 | 1.25E-40  | 7.12E-14 | 9.55E-07 | 3.61E-06 | 3.65E-14 | 3.65E-14 | 1.00E+00 |
| 371.71643 | 23.32  | 14.99 | 17.64 | 15.09 | 16.58 | 8.03E-16  | 2.10E-13 | 9.88E-01 | 1.87E-05 | 3.38E-12 | 1.21E-02 | 1.15E-04 |
| 371.73811 | 24.06  | 17.05 | 21.29 | 19.46 | 20.28 | 1.73E-65  | 3.65E-14 | 3.65E-14 | 3.65E-14 | 7.05E-14 | 4.73E-07 | 3.78E-05 |
| 371.86131 | 50.4   | 16.31 | 18.96 | 19.22 | 18.36 | 2.60E-38  | 3.65E-14 | 3.65E-14 | 7.41E-14 | 5.69E-01 | 2.10E-02 | 2.36E-04 |
| 371.95402 | 113.45 | 13.72 | 16.91 | 16.67 | 16.71 | 4.90E-19  | 7.58E-14 | 1.36E-13 | 2.91E-13 | 9.15E-01 | 9.48E-01 | 1.00E+00 |
| 371.98386 | 78.43  | 15.61 | 15.77 | 15.30 | 15.30 | 3.20E-01  | 9.40E-01 | 7.16E-01 | 7.38E-01 | 3.92E-01 | 4.23E-01 | 1.00E+00 |
| 372.03948 | 284.64 | 12.72 | 16.29 | 16.33 | 15.52 | 2.24E-22  | 7.41E-14 | 7.45E-14 | 8.97E-12 | 1.00E+00 | 1.91E-01 | 1.50E-01 |
| 372.06131 | 78.05  | 16.74 | 17.73 | 16.64 | 17.93 | 5.70E-04  | 3.63E-02 | 9.93E-01 | 9.10E-03 | 2.10E-02 | 9.53E-01 | 5.05E-03 |
| 372.08061 | 219.08 | 15.69 | 15.48 | 17.40 | 17.04 | 5.74E-05  | 9.71E-01 | 1.65E-03 | 2.79E-02 | 5.11E-04 | 1.04E-02 | 8.84E-01 |
| 372.09092 | 68.94  | 18.58 | 19.30 | 20.10 | 19.31 | 9.07E-15  | 1.59E-04 | 7.48E-14 | 2.09E-04 | 4.26E-05 | 1.00E+00 | 8.28E-05 |
| 372.09897 | 64.79  | 14.77 | 9.91  | 12.17 | 15.84 | 7.29E-42  | 3.65E-14 | 8.77E-12 | 1.73E-02 | 8.75E-09 | 3.65E-14 | 7.61E-14 |
| 372.10597 | 280.4  | 16.63 | 21.66 | 23.08 | 21.43 | 1.26E-65  | 3.65E-14 | 3.65E-14 | 3.65E-14 | 2.76E-06 | 8.45E-01 | 8.35E-08 |
| 372.19038 | 113.31 | 19.90 | 19.54 | 19.93 | 19.36 | 1.40E-02  | 2.56E-01 | 9.99E-01 | 4.02E-02 | 2.16E-01 | 8.31E-01 | 3.29E-02 |
| 372.20444 | 113.8  | 8.85  | 16.50 | 15.94 | 15.45 | 5.13E-50  | 3.65E-14 | 3.65E-14 | 3.65E-14 | 5.91E-01 | 1.03E-01 | 7.00E-01 |
| 372.21865 | 23.05  | 12.68 | 16.52 | 14.88 | 15.69 | 5.92E-22  | 6.14E-14 | 9.42E-09 | 1.29E-13 | 5.25E-05 | 1.20E-01 | 1.28E-01 |
| 372.23082 | 25.73  | 14.34 | 13.44 | 10.70 | 15.59 | 1.08E-13  | 3.92E-01 | 3.29E-09 | 1.40E-01 | 2.30E-05 | 2.38E-03 | 1.72E-13 |
| 372.23994 | 25.99  | 16.76 | 19.94 | 18.12 | 18.89 | 5.10E-29  | 3.65E-14 | 1.21E-07 | 7.65E-14 | 1.15E-11 | 2.49E-04 | 1.28E-02 |
| 372.31072 | 24.23  | 22.40 | 22.99 | 23.00 | 22.36 | 1.29E-02  | 9.15E-02 | 7.53E-02 | 9.99E-01 | 1.00E+00 | 9.26E-02 | 7.74E-02 |
| 372.31854 | 288.3  | 20.26 | 20.37 | 20.48 | 20.32 | 9.06E-01  | 9.85E-01 | 8.85E-01 | 9.98E-01 | 9.84E-01 | 9.99E-01 | 9.57E-01 |
| 372.31877 | 145.77 | 19.79 | 19.63 | 19.34 | 19.23 | 1.97E-01  | 9.36E-01 | 3.70E-01 | 2.14E-01 | 7.53E-01 | 5.47E-01 | 9.83E-01 |
| 372.36116 | 24.74  | 17.21 | 9.81  | 11.69 | 12.31 | 1.32E-38  | 3.65E-14 | 3.87E-14 | 7.12E-14 | 5.61E-04 | 4.21E-06 | 5.78E-01 |
| 372.45507 | 115.8  | 9.95  | 13.97 | 14.47 | 12.97 | 4.61E-14  | 1.49E-10 | 5.41E-13 | 3.42E-06 | 8.29E-01 | 3.53E-01 | 6.31E-02 |
| 372.52672 | 27.31  | 15.57 | 18.47 | 16.91 | 18.24 | 6.94E-24  | 6.43E-14 | 5.75E-06 | 7.38E-14 | 2.94E-07 | 8.55E-01 | 2.64E-05 |
| 372.60161 | 281.06 | 15.38 | 19.31 | 20.67 | 18.73 | 7.08E-56  | 3.65E-14 | 3.65E-14 | 3.65E-14 | 1.27E-06 | 1.19E-01 | 1.10E-11 |
| 372.73205 | 48.1   | 18.08 | 18.74 | 18.56 | 18.35 | 9.00E-04  | 5.69E-04 | 1.99E-02 | 3.91E-01 | 7.22E-01 | 1.23E-01 | 6.20E-01 |
| 372.74599 | 26.14  | 17.70 | 21.22 | 19.67 | 20.81 | 4.58E-70  | 3.65E-14 | 3.65E-14 | 3.65E-14 | 6.27E-14 | 2.99E-02 | 1.48E-12 |
| 372.77429 | 45.26  | 15.59 | 13.33 | 14.76 | 13.54 | 1.92E-09  | 2.23E-08 | 1.05E-01 | 8.92E-07 | 1.10E-03 | 9.49E-01 | 9.88E-03 |
| 372.86485 | 44.5   | 13.31 | 14.99 | 16.75 | 16.48 | 6.57E-19  | 5.30E-05 | 7.54E-14 | 1.18E-13 | 3.42E-05 | 1.02E-03 | 9.02E-01 |
| 372.92545 | 32.96  | 14.73 | 13.02 | 12.93 | 12.93 | 5.33E-07  | 3.80E-05 | 1.11E-05 | 2.26E-05 | 9.96E-01 | 9.96E-01 | 1.00E+00 |
| 372.96123 | 48.73  | 18.01 | 16.53 | 16.74 | 16.57 | 3.96E-15  | 1.60E-12 | 7.05E-10 | 1.54E-11 | 7.11E-01 | 9.98E-01 | 8.22E-01 |
| 373.02109 | 285.12 | 16.21 | 15.82 | 16.55 | 15.74 | 2.60E-02  | 5.32E-01 | 6.18E-01 | 3.74E-01 | 6.37E-02 | 9.92E-01 | 3.50E-02 |
| 373.04139 | 53.44  | 16.72 | 17.10 | 17.56 | 17.44 | 1.06E-05  | 1.37E-01 | 1.47E-05 | 4.64E-04 | 5.30E-02 | 2.52E-01 | 9.21E-01 |
| 373.06457 | 77.88  | 16.81 | 17.73 | 16.23 | 17.17 | 1.35E-03  | 6.57E-02 | 3.84E-01 | 7.72E-01 | 5.72E-04 | 4.93E-01 | 7.22E-02 |
| 373.10359 | 285.77 | 14.92 | 17.49 | 18.74 | 17.16 | 2.01E-39  | 5.41E-14 | 3.65E-14 | 7.32E-14 | 1.91E-06 | 5.23E-01 | 2.85E-09 |
| 373.19834 | 27.12  | 12.60 | 16.46 | 11.48 | 15.34 | 1.08E-17  | 1.51E-10 | 1.70E-01 | 1.28E-05 | 7.49E-14 | 2.21E-01 | 1.02E-09 |
| 373.24776 | 25.88  | 17.10 | 19.78 | 18.00 | 19.42 | 1.46E-44  | 3.65E-14 | 2.43E-07 | 3.65E-14 | 6.56E-14 | 1.65E-01 | 1.08E-13 |
| 373.29444 | 19.59  | 16.58 | 7.01  | 7.41  | 8.29  | 1.65E-81  | 3.65E-14 | 3.65E-14 | 3.65E-14 | 6.66E-01 | 3.35E-03 | 7.99E-02 |
| 373.31347 | 23.07  | 20.29 | 20.67 | 20.75 | 20.17 | 4.30E-02  | 3.57E-01 | 1.88E-01 | 9.52E-01 | 9.87E-01 | 1.68E-01 | 7.79E-02 |
| 373.32202 | 179.27 | 16.85 | 14.85 | 15.01 | 15.36 | 4.56E-12  | 9.18E-11 | 1.92E-09 | 3.60E-06 | 9.39E-01 | 3.06E-01 | 6.32E-01 |
| 373.60495 | 237.2  | 17.42 | 17.32 | 18.44 | 17.01 | 1.72E-11  | 9.55E-01 | 5.84E-07 | 1.56E-01 | 1.13E-07 | 4.10E-01 | 4.05E-11 |
| 373.70505 | 26.94  | 11.84 | 17.84 | 9.21  | 9.40  | 4.92E-121 | 3.65E-14 | 3.65E-14 | 3.65E-14 | 3.65E-14 | 3.65E-14 | 7.41E-01 |
| 373.75079 | 24.55  | 15.90 | 17.50 | 17.16 | 17.30 | 1.02E-15  | 1.09E-13 | 1.09E-09 | 7.39E-11 | 3.11E-01 | 7.52E-01 | 9.04E-01 |

|           |        |       |       |       |       |          |          |          |          |          |          |          |
|-----------|--------|-------|-------|-------|-------|----------|----------|----------|----------|----------|----------|----------|
| 373.83483 | 44.91  | 17.46 | 15.79 | 15.97 | 16.16 | 9.38E-10 | 7.93E-09 | 2.32E-07 | 1.67E-05 | 9.07E-01 | 5.50E-01 | 9.07E-01 |
| 373.85825 | 49.54  | 15.23 | 16.23 | 16.49 | 16.09 | 9.59E-15 | 9.75E-10 | 9.65E-14 | 4.51E-07 | 3.57E-01 | 7.83E-01 | 5.49E-02 |
| 373.87053 | 27.92  | 14.87 | 19.14 | 15.80 | 18.48 | 1.53E-23 | 7.15E-14 | 1.05E-01 | 9.25E-14 | 8.74E-13 | 4.26E-01 | 1.95E-08 |
| 373.9092  | 41.23  | 17.48 | 17.45 | 17.90 | 17.30 | 6.69E-06 | 9.96E-01 | 1.12E-03 | 4.29E-01 | 8.00E-04 | 5.88E-01 | 5.36E-06 |
| 373.94796 | 53.63  | 20.17 | 19.42 | 19.03 | 18.88 | 3.81E-12 | 1.62E-04 | 1.79E-09 | 5.37E-11 | 1.25E-01 | 1.88E-02 | 8.47E-01 |
| 374.03791 | 56.27  | 18.69 | 19.44 | 19.46 | 18.78 | 6.08E-07 | 1.00E-04 | 4.09E-05 | 9.62E-01 | 9.98E-01 | 1.66E-03 | 8.25E-04 |
| 374.09598 | 118.46 | 15.00 | 17.44 | 14.71 | 16.62 | 9.73E-26 | 7.21E-14 | 6.35E-01 | 4.56E-09 | 6.27E-14 | 9.31E-03 | 1.60E-11 |
| 374.10597 | 239.66 | 13.47 | 13.81 | 13.99 | 13.32 | 7.29E-01 | 9.52E-01 | 8.40E-01 | 9.95E-01 | 9.92E-01 | 8.83E-01 | 7.38E-01 |
| 374.13725 | 100.53 | 17.10 | 14.33 | 14.36 | 14.43 | 5.12E-24 | 7.62E-14 | 7.23E-14 | 7.41E-14 | 9.99E-01 | 9.85E-01 | 9.96E-01 |
| 374.19921 | 56.75  | 16.02 | 17.21 | 17.03 | 16.71 | 2.49E-03 | 2.42E-03 | 1.33E-02 | 1.82E-01 | 9.51E-01 | 4.93E-01 | 8.02E-01 |
| 374.25537 | 23.76  | 16.68 | 15.66 | 15.31 | 16.81 | 2.57E-05 | 1.85E-02 | 5.53E-04 | 9.86E-01 | 7.69E-01 | 1.10E-02 | 3.54E-04 |
| 374.28996 | 23.19  | 14.55 | 13.71 | 12.53 | 13.23 | 4.99E-07 | 8.12E-02 | 1.36E-07 | 1.77E-03 | 6.73E-03 | 5.71E-01 | 2.34E-01 |
| 374.31682 | 23.16  | 17.00 | 16.75 | 17.02 | 16.51 | 1.88E-01 | 7.47E-01 | 1.00E+00 | 2.33E-01 | 7.30E-01 | 8.11E-01 | 2.29E-01 |
| 374.72695 | 46.87  | 16.57 | 17.50 | 17.43 | 17.05 | 2.21E-13 | 7.12E-12 | 1.23E-10 | 9.62E-04 | 9.52E-01 | 4.21E-03 | 1.97E-02 |
| 374.73481 | 52.31  | 16.46 | 15.19 | 14.97 | 15.81 | 1.97E-05 | 5.60E-04 | 2.99E-05 | 2.02E-01 | 9.16E-01 | 2.58E-01 | 6.49E-02 |
| 374.77151 | 45.18  | 15.05 | 14.12 | 15.24 | 14.08 | 1.41E-03 | 4.71E-02 | 9.49E-01 | 4.23E-02 | 1.27E-02 | 1.00E+00 | 1.16E-02 |
| 374.80859 | 44.61  | 15.20 | 17.35 | 16.72 | 17.26 | 7.13E-21 | 7.45E-14 | 1.69E-10 | 7.47E-14 | 2.85E-02 | 9.76E-01 | 9.84E-02 |
| 374.81652 | 47.63  | 16.91 | 19.02 | 19.14 | 18.92 | 2.50E-52 | 3.65E-14 | 3.65E-14 | 3.65E-14 | 7.47E-01 | 8.82E-01 | 3.14E-01 |
| 374.86609 | 30.71  | 18.31 | 20.35 | 19.93 | 19.77 | 4.30E-34 | 3.65E-14 | 4.67E-14 | 7.38E-14 | 2.49E-02 | 9.50E-04 | 6.97E-01 |
| 374.90567 | 38.11  | 17.44 | 17.56 | 17.17 | 17.15 | 7.11E-02 | 8.99E-01 | 4.35E-01 | 3.79E-01 | 1.45E-01 | 1.23E-01 | 9.99E-01 |
| 374.94105 | 51.68  | 20.69 | 22.70 | 22.65 | 22.02 | 6.77E-21 | 7.41E-14 | 7.63E-14 | 1.42E-08 | 9.96E-01 | 1.19E-02 | 2.15E-02 |
| 375.01387 | 53.05  | 17.44 | 15.70 | 15.36 | 15.82 | 1.41E-10 | 3.17E-07 | 5.64E-10 | 3.87E-06 | 7.03E-01 | 9.85E-01 | 4.94E-01 |
| 375.04123 | 253.5  | 10.92 | 14.80 | 14.53 | 11.35 | 5.29E-16 | 1.06E-11 | 1.64E-10 | 8.51E-01 | 9.55E-01 | 1.06E-08 | 1.16E-07 |
| 375.05387 | 86.14  | 17.11 | 19.57 | 19.57 | 19.20 | 1.13E-18 | 7.76E-14 | 7.66E-14 | 5.38E-11 | 1.00E+00 | 5.88E-01 | 5.78E-01 |
| 375.06538 | 67.42  | 15.80 | 14.69 | 13.54 | 15.07 | 2.53E-10 | 2.66E-03 | 3.64E-11 | 1.08E-01 | 2.46E-03 | 6.60E-01 | 3.52E-05 |
| 375.18872 | 75.99  | 17.09 | 16.99 | 17.12 | 16.99 | 9.72E-01 | 9.90E-01 | 1.00E+00 | 9.91E-01 | 9.81E-01 | 1.00E+00 | 9.83E-01 |
| 375.21237 | 43.74  | 18.40 | 16.59 | 17.12 | 17.73 | 1.66E-23 | 4.74E-14 | 2.46E-13 | 3.09E-04 | 6.94E-03 | 6.51E-10 | 1.83E-03 |
| 375.22418 | 59.81  | 16.52 | 17.27 | 17.42 | 17.34 | 1.63E-06 | 2.80E-04 | 6.26E-06 | 1.04E-04 | 8.50E-01 | 9.87E-01 | 9.70E-01 |
| 375.5334  | 258.91 | 11.75 | 16.85 | 17.69 | 15.16 | 1.40E-36 | 3.67E-14 | 3.65E-14 | 1.44E-13 | 1.75E-01 | 5.99E-04 | 5.34E-08 |
| 375.80953 | 50.94  | 18.29 | 19.47 | 19.80 | 19.05 | 7.41E-13 | 2.79E-08 | 8.17E-13 | 8.44E-04 | 3.31E-01 | 1.84E-01 | 1.63E-03 |
| 375.83242 | 45.19  | 17.59 | 15.63 | 15.76 | 16.13 | 1.18E-14 | 7.96E-13 | 1.28E-11 | 2.06E-07 | 9.53E-01 | 2.19E-01 | 4.80E-01 |
| 375.87237 | 35.66  | 11.38 | 15.80 | 15.53 | 14.81 | 4.66E-16 | 1.44E-13 | 1.12E-12 | 1.13E-08 | 9.59E-01 | 2.99E-01 | 5.76E-01 |
| 375.89522 | 78.8   | 14.68 | 15.61 | 14.63 | 15.59 | 5.89E-02 | 1.96E-01 | 1.00E+00 | 2.30E-01 | 1.78E-01 | 1.00E+00 | 2.09E-01 |
| 375.90753 | 49.64  | 16.35 | 15.35 | 15.66 | 15.62 | 9.42E-11 | 6.50E-11 | 7.42E-06 | 5.05E-06 | 1.31E-01 | 2.47E-01 | 9.94E-01 |
| 375.92724 | 103.47 | 17.64 | 20.42 | 20.95 | 19.69 | 1.26E-22 | 7.36E-14 | 6.21E-14 | 2.77E-09 | 3.33E-01 | 1.20E-01 | 7.64E-04 |
| 375.93636 | 43.65  | 16.51 | 18.53 | 18.17 | 18.23 | 1.38E-36 | 3.65E-14 | 3.87E-14 | 3.90E-14 | 6.34E-02 | 1.76E-01 | 9.82E-01 |
| 375.94435 | 52.53  | 17.21 | 17.76 | 17.74 | 17.43 | 1.99E-05 | 1.10E-04 | 1.88E-04 | 3.27E-01 | 9.98E-01 | 6.51E-02 | 9.15E-02 |
| 375.97    | 50.3   | 18.55 | 18.69 | 19.58 | 18.99 | 6.37E-07 | 8.84E-01 | 5.98E-07 | 1.16E-01 | 3.97E-05 | 4.53E-01 | 1.54E-02 |
| 376.0232  | 87.1   | 17.98 | 11.84 | 13.14 | 13.07 | 2.86E-60 | 3.65E-14 | 3.65E-14 | 3.65E-14 | 4.61E-05 | 2.51E-04 | 9.94E-01 |
| 376.052   | 64.26  | 19.58 | 19.68 | 19.76 | 20.15 | 2.97E-02 | 9.43E-01 | 7.52E-01 | 1.90E-02 | 9.76E-01 | 9.77E-02 | 2.18E-01 |
| 376.14236 | 100.09 | 16.86 | 19.25 | 17.29 | 18.18 | 8.96E-10 | 1.14E-09 | 6.23E-01 | 2.33E-03 | 1.27E-06 | 2.57E-02 | 8.68E-02 |
| 376.25913 | 24.25  | 22.81 | 22.88 | 22.97 | 22.29 | 3.14E-02 | 9.89E-01 | 8.89E-01 | 1.32E-01 | 9.80E-01 | 7.79E-02 | 2.75E-02 |
| 376.6518  | 31.44  | 15.17 | 16.73 | 18.51 | 17.50 | 4.33E-25 | 3.58E-07 | 3.79E-14 | 2.05E-13 | 9.76E-09 | 4.43E-02 | 3.32E-03 |
| 376.67768 | 46.24  | 17.26 | 16.40 | 16.49 | 16.16 | 4.40E-07 | 9.58E-05 | 5.41E-04 | 6.29E-07 | 9.69E-01 | 6.48E-01 | 3.69E-01 |
| 376.72849 | 43.05  | 15.81 | 16.80 | 14.91 | 15.88 | 7.06E-07 | 9.69E-03 | 2.17E-02 | 9.96E-01 | 8.91E-08 | 3.12E-02 | 1.84E-02 |
| 376.75713 | 27.37  | 15.71 | 17.50 | 18.73 | 17.09 | 1.91E-29 | 2.81E-13 | 3.65E-14 | 3.25E-08 | 8.25E-07 | 2.87E-01 | 9.98E-11 |
| 376.81316 | 39.96  | 19.12 | 18.75 | 18.85 | 18.80 | 1.44E-02 | 1.57E-02 | 1.10E-01 | 5.71E-02 | 8.80E-01 | 9.82E-01 | 9.86E-01 |
| 376.86534 | 34.07  | 16.05 | 18.41 | 17.91 | 17.92 | 2.25E-25 | 4.45E-14 | 7.32E-14 | 7.66E-14 | 7.61E-02 | 1.03E-01 | 1.00E+00 |
| 376.88405 | 40.23  | 14.81 | 17.51 | 17.68 | 17.38 | 6.65E-42 | 3.65E-14 | 3.65E-14 | 3.65E-14 | 8.10E-01 | 9.26E-01 | 4.45E-01 |
| 376.90219 | 30.69  | 17.53 | 17.40 | 17.71 | 17.52 | 1.32E-01 | 7.35E-01 | 4.79E-01 | 1.00E+00 | 8.25E-02 | 8.14E-01 | 4.77E-01 |
| 376.93829 | 52.11  | 19.29 | 21.26 | 21.26 | 20.66 | 2.53E-22 | 7.25E-14 | 7.45E-14 | 7.50E-10 | 1.00E+00 | 2.45E-02 | 2.45E-02 |
| 376.97687 | 60.41  | 18.85 | 16.87 | 18.72 | 17.27 | 5.50E-12 | 2.07E-09 | 9.75E-01 | 4.05E-06 | 4.44E-08 | 5.94E-01 | 4.13E-05 |
| 377.03358 | 61.51  | 17.22 | 17.29 | 17.92 | 17.01 | 2.61E-05 | 9.80E-01 | 8.14E-04 | 6.87E-01 | 4.94E-03 | 4.78E-01 | 2.34E-05 |
| 377.05231 | 71.2   | 15.88 | 15.43 | 15.23 | 16.57 | 3.09E-05 | 3.61E-01 | 7.91E-02 | 6.67E-02 | 8.86E-01 | 6.18E-04 | 2.85E-05 |
| 377.09229 | 59.29  | 16.84 | 17.73 | 18.35 | 17.38 | 2.92E-20 | 9.94E-09 | 6.54E-14 | 1.72E-03 | 2.04E-04 | 8.29E-02 | 2.73E-09 |
| 377.14578 | 91.53  | 20.56 | 22.31 | 21.36 | 21.38 | 9.28E-13 | 1.25E-13 | 9.07E-04 | 9.58E-04 | 8.93E-05 | 2.61E-04 | 9.99E-01 |
| 377.15367 | 30.58  | 15.41 | 13.13 | 16.68 | 14.93 | 1.25E-25 | 1.58E-13 | 3.39E-05 | 3.24E-01 | 3.70E-14 | 2.14E-08 | 3.66E-08 |
| 377.1919  | 27.59  | 13.18 | 14.15 | 16.05 | 16.93 | 1.10E-14 | 1.44E-01 | 6.73E-09 | 3.97E-13 | 3.84E-04 | 1.55E-07 | 2.50E-01 |
| 377.20377 | 28.99  | 15.55 | 17.72 | 18.71 | 17.98 | 3.98E-22 | 1.40E-11 | 6.07E-14 | 2.72E-13 | 5.59E-03 | 8.29E-01 | 8.24E-02 |
| 377.22903 | 26.81  | 16.62 | 16.93 | 17.42 | 16.47 | 1.61E-02 | 7.50E-01 | 4.22E-02 | 9.61E-01 | 3.86E-01 | 4.89E-01 | 1.67E-02 |
| 377.25491 | 23.24  | 15.59 | 12.98 | 16.18 | 15.64 | 1.51E-21 | 7.92E-14 | 1.93E-01 | 9.98E-01 | 7.14E-01 | 1.10E-13 | 3.22E-01 |
| 377.26252 | 24.17  | 20.67 | 20.52 | 20.68 | 20.08 | 3.75E-02 | 8.94E-01 | 1.00E+00 | 4.45E-02 | 8.95E-01 | 2.37E-01 | 4.98E-02 |
| 377.70374 | 29.68  | 15.86 | 16.56 | 16.54 | 17.03 | 2.94E-04 | 3.70E-02 | 4.33E-02 | 9.82E-05 | 1.00E+00 | 3.19E-01 | 2.72E-01 |
| 377.72945 | 28.1   | 17.18 | 18.73 | 18.61 | 17.21 | 2.06E-19 | 3.16E-13 | 6.67E-12 | 9.99E-01 | 9.35E-01 | 9.28E-12 | 1.97E-10 |
| 377.73832 | 26.85  | 14.89 | 18.32 | 15.13 | 18.10 | 4.82E-22 | 7.56E-14 | 9.18E-01 | 2.43E-13 | 3.01E-13 | 9.49E-01 | 2.22E-11 |
| 377.75679 | 26.26  | 13.26 | 16.95 | 13.26 | 16.10 | 9.02E-19 | 1.10E-13 | 1.00E+00 | 1.02E-08 | 1.96E-13 | 2.61E-01 | 2.16E-08 |
| 377.76537 | 90.35  | 16.63 | 18.32 | 15.76 | 18.67 | 7.46E-12 | 3.04E-04 | 1.42E-01 | 1.33E-05 | 2.75E-08 | 8.49E-01 | 6.73E-10 |
| 377.80654 | 49.58  | 18.43 | 19.66 | 20.00 | 19.17 | 2.01E-12 | 5.07E-08 | 2.49E-12 | 2.80E-03 | 3.71E-01 | 1.18E-01 | 9.60E-04 |

|           |        |       |       |       |       |           |          |          |          |          |          |          |
|-----------|--------|-------|-------|-------|-------|-----------|----------|----------|----------|----------|----------|----------|
| 377.93432 | 43.71  | 14.85 | 16.09 | 15.46 | 15.80 | 1.57E-09  | 1.05E-09 | 6.41E-03 | 7.52E-06 | 5.09E-03 | 4.43E-01 | 2.91E-01 |
| 377.94103 | 60.3   | 15.78 | 15.84 | 15.62 | 15.87 | 7.57E-01  | 9.94E-01 | 9.17E-01 | 9.78E-01 | 8.15E-01 | 9.99E-01 | 7.49E-01 |
| 377.96538 | 49.87  | 17.08 | 15.49 | 16.18 | 15.80 | 6.22E-10  | 6.79E-10 | 7.93E-04 | 1.44E-06 | 2.39E-02 | 6.09E-01 | 4.09E-01 |
| 377.99367 | 49.29  | 15.40 | 15.28 | 15.81 | 16.00 | 4.69E-02  | 9.73E-01 | 4.34E-01 | 1.53E-01 | 2.40E-01 | 7.03E-02 | 9.19E-01 |
| 378.00787 | 68.37  | 14.43 | 15.65 | 14.34 | 15.11 | 4.59E-03  | 1.30E-02 | 9.97E-01 | 3.40E-01 | 8.77E-03 | 5.82E-01 | 2.62E-01 |
| 378.01011 | 239.31 | 14.33 | 16.19 | 17.95 | 15.98 | 8.59E-19  | 1.43E-06 | 7.12E-14 | 4.02E-05 | 1.01E-05 | 9.42E-01 | 1.18E-06 |
| 378.04707 | 60.27  | 16.82 | 15.85 | 15.61 | 16.39 | 3.82E-04  | 8.14E-03 | 4.39E-04 | 5.25E-01 | 8.71E-01 | 3.18E-01 | 6.69E-02 |
| 378.05705 | 82.49  | 17.92 | 21.40 | 22.08 | 20.72 | 1.25E-38  | 3.65E-14 | 3.65E-14 | 7.23E-14 | 7.10E-02 | 8.39E-02 | 1.81E-05 |
| 378.06919 | 79.02  | 14.86 | 17.04 | 17.24 | 15.65 | 7.15E-13  | 2.38E-09 | 5.11E-11 | 9.98E-02 | 9.37E-01 | 6.02E-04 | 5.13E-05 |
| 378.07111 | 268.66 | 19.58 | 22.41 | 21.71 | 20.66 | 1.46E-25  | 4.05E-14 | 7.43E-14 | 1.01E-04 | 2.56E-02 | 2.67E-10 | 2.02E-04 |
| 378.13285 | 56.75  | 15.40 | 14.39 | 14.14 | 16.15 | 1.11E-10  | 3.16E-03 | 8.39E-05 | 6.19E-02 | 8.17E-01 | 1.93E-07 | 1.47E-09 |
| 378.20862 | 21.82  | 18.90 | 12.43 | 13.04 | 14.71 | 4.26E-71  | 3.65E-14 | 3.65E-14 | 3.65E-14 | 9.60E-02 | 1.06E-13 | 1.52E-08 |
| 378.23122 | 27.34  | 15.54 | 16.92 | 15.87 | 14.57 | 9.98E-06  | 6.79E-03 | 8.55E-01 | 1.20E-01 | 7.62E-02 | 2.20E-06 | 1.97E-02 |
| 378.24062 | 28.26  | 15.38 | 16.17 | 11.48 | 15.84 | 1.58E-20  | 3.43E-01 | 1.28E-13 | 7.79E-01 | 7.41E-14 | 9.13E-01 | 7.79E-14 |
| 378.26628 | 42.74  | 18.51 | 19.94 | 20.61 | 19.76 | 1.24E-35  | 7.05E-14 | 3.65E-14 | 7.58E-14 | 2.16E-05 | 5.92E-01 | 8.04E-08 |
| 378.67474 | 46.57  | 18.06 | 17.73 | 17.78 | 17.25 | 2.60E-04  | 2.30E-01 | 3.76E-01 | 6.47E-05 | 9.90E-01 | 5.32E-02 | 2.24E-02 |
| 378.74608 | 31.35  | 16.18 | 18.60 | 17.24 | 18.47 | 5.22E-24  | 6.81E-14 | 2.40E-05 | 7.49E-14 | 1.20E-07 | 9.47E-01 | 3.79E-06 |
| 378.76564 | 24.19  | 15.66 | 18.20 | 17.93 | 17.84 | 1.02E-21  | 7.25E-14 | 7.44E-14 | 1.30E-13 | 7.46E-01 | 5.45E-01 | 9.84E-01 |
| 378.81083 | 47.98  | 15.03 | 15.94 | 16.01 | 16.14 | 2.18E-13  | 1.56E-08 | 7.35E-10 | 1.51E-11 | 9.65E-01 | 5.47E-01 | 8.17E-01 |
| 378.89601 | 305.88 | 13.18 | 17.55 | 16.92 | 13.58 | 1.90E-45  | 3.65E-14 | 3.65E-14 | 5.16E-01 | 1.35E-01 | 3.65E-14 | 5.16E-14 |
| 378.89945 | 49.22  | 18.68 | 18.61 | 18.94 | 18.80 | 8.20E-02  | 9.49E-01 | 1.98E-01 | 8.09E-01 | 7.18E-02 | 5.16E-01 | 7.51E-01 |
| 378.92405 | 43.31  | 16.83 | 17.89 | 17.92 | 17.72 | 5.16E-07  | 1.02E-05 | 4.06E-06 | 4.46E-04 | 9.99E-01 | 8.82E-01 | 8.12E-01 |
| 378.93452 | 55.93  | 17.12 | 17.74 | 17.93 | 17.74 | 1.26E-03  | 2.15E-02 | 1.06E-03 | 2.65E-02 | 8.31E-01 | 1.00E+00 | 8.41E-01 |
| 378.9476  | 28.91  | 14.98 | 13.20 | 13.78 | 13.77 | 5.41E-03  | 3.02E-03 | 8.05E-02 | 9.48E-02 | 6.85E-01 | 7.15E-01 | 1.00E+00 |
| 378.95002 | 289.55 | 12.94 | 15.33 | 16.37 | 14.89 | 9.78E-17  | 2.42E-09 | 7.29E-14 | 2.73E-06 | 2.99E-02 | 6.62E-01 | 8.29E-04 |
| 378.99052 | 50.05  | 16.59 | 16.42 | 16.51 | 16.57 | 8.47E-01  | 8.36E-01 | 9.81E-01 | 1.00E+00 | 9.70E-01 | 8.91E-01 | 9.92E-01 |
| 379.02463 | 85.66  | 16.89 | 15.18 | 14.35 | 13.78 | 1.23E-08  | 3.73E-03 | 2.90E-06 | 2.50E-08 | 3.54E-01 | 3.97E-02 | 6.95E-01 |
| 379.0437  | 258.15 | 11.93 | 14.21 | 11.57 | 11.00 | 9.67E-10  | 9.92E-06 | 8.56E-01 | 2.06E-01 | 4.25E-07 | 2.38E-09 | 6.49E-01 |
| 379.05106 | 90.19  | 14.12 | 16.04 | 16.38 | 14.25 | 9.17E-21  | 6.81E-12 | 7.43E-14 | 9.57E-01 | 5.69E-01 | 1.46E-09 | 6.32E-13 |
| 379.05836 | 85.57  | 16.33 | 18.01 | 18.78 | 17.68 | 1.76E-24  | 2.12E-13 | 3.87E-14 | 5.40E-09 | 1.81E-03 | 4.29E-01 | 4.42E-06 |
| 379.07442 | 249.98 | 16.53 | 18.63 | 18.48 | 17.55 | 1.94E-18  | 7.52E-14 | 9.16E-14 | 1.48E-04 | 9.24E-01 | 9.74E-05 | 9.52E-04 |
| 379.10412 | 272.56 | 14.93 | 16.35 | 15.89 | 15.97 | 4.64E-05  | 2.58E-05 | 8.17E-03 | 5.28E-03 | 4.44E-01 | 6.24E-01 | 9.95E-01 |
| 379.14998 | 99.68  | 15.26 | 14.54 | 13.04 | 14.52 | 2.63E-20  | 3.53E-03 | 6.43E-14 | 3.45E-03 | 1.40E-10 | 1.00E+00 | 6.52E-10 |
| 379.24874 | 24.89  | 15.94 | 16.85 | 15.44 | 17.08 | 3.01E-08  | 7.01E-03 | 2.76E-01 | 5.46E-04 | 9.85E-06 | 8.66E-01 | 4.08E-07 |
| 379.26722 | 24.79  | 13.80 | 15.91 | 17.02 | 15.78 | 7.91E-12  | 5.34E-06 | 1.60E-12 | 3.85E-05 | 4.85E-02 | 9.91E-01 | 2.55E-02 |
| 379.28314 | 25.25  | 20.39 | 19.59 | 20.08 | 19.82 | 1.73E-02  | 1.14E-02 | 6.16E-01 | 1.41E-01 | 2.50E-01 | 8.30E-01 | 7.77E-01 |
| 379.5586  | 263.76 | 15.31 | 15.11 | 16.06 | 14.94 | 2.14E-05  | 8.18E-01 | 5.47E-03 | 4.07E-01 | 3.64E-04 | 9.04E-01 | 3.12E-05 |
| 379.70494 | 43.94  | 13.55 | 17.30 | 10.06 | 10.30 | 5.65E-54  | 7.27E-14 | 7.36E-14 | 8.03E-14 | 3.65E-14 | 3.65E-14 | 9.19E-01 |
| 379.80391 | 49.4   | 17.63 | 18.28 | 18.60 | 17.64 | 7.99E-06  | 1.65E-02 | 5.73E-05 | 1.00E+00 | 4.61E-01 | 3.02E-02 | 2.01E-04 |
| 379.84879 | 44.93  | 17.41 | 15.60 | 15.02 | 15.52 | 9.92E-19  | 3.93E-11 | 7.41E-14 | 1.84E-11 | 1.05E-01 | 9.90E-01 | 2.22E-01 |
| 379.89322 | 51.14  | 18.19 | 19.15 | 19.46 | 18.85 | 9.71E-11  | 1.10E-06 | 5.60E-11 | 2.13E-03 | 3.24E-01 | 3.88E-01 | 6.93E-03 |
| 379.90341 | 79.15  | 15.21 | 18.47 | 18.74 | 18.09 | 7.33E-21  | 7.49E-14 | 7.44E-14 | 2.80E-12 | 8.80E-01 | 7.58E-01 | 3.17E-01 |
| 380.01296 | 47.23  | 16.84 | 15.97 | 16.64 | 16.25 | 1.07E-03  | 1.05E-03 | 8.18E-01 | 5.93E-02 | 2.32E-02 | 6.59E-01 | 3.58E-01 |
| 380.05523 | 84.26  | 16.20 | 18.20 | 18.96 | 17.81 | 1.73E-31  | 7.24E-14 | 3.65E-14 | 9.29E-13 | 1.18E-03 | 2.39E-01 | 4.25E-07 |
| 380.05936 | 258.91 | 13.44 | 15.37 | 15.00 | 13.78 | 6.60E-12  | 4.24E-10 | 4.10E-07 | 6.51E-01 | 5.69E-01 | 1.33E-06 | 2.97E-04 |
| 380.11202 | 68.84  | 16.05 | 19.38 | 19.45 | 18.20 | 6.04E-31  | 3.76E-14 | 3.70E-14 | 3.03E-12 | 9.94E-01 | 3.80E-04 | 1.21E-04 |
| 380.20764 | 32.87  | 15.13 | 16.77 | 15.70 | 15.68 | 4.72E-03  | 1.86E-03 | 5.79E-01 | 6.32E-01 | 9.49E-02 | 1.04E-01 | 1.00E+00 |
| 380.22783 | 28.78  | 16.56 | 19.02 | 18.95 | 18.43 | 1.51E-27  | 4.65E-14 | 5.23E-14 | 9.61E-14 | 9.86E-01 | 4.60E-02 | 9.87E-02 |
| 380.28685 | 24.18  | 18.38 | 16.69 | 17.54 | 17.51 | 1.88E-06  | 2.66E-07 | 2.34E-02 | 2.44E-02 | 3.13E-02 | 4.99E-02 | 1.00E+00 |
| 380.40935 | 260.49 | 13.45 | 14.89 | 15.95 | 13.48 | 3.15E-12  | 4.59E-04 | 1.41E-10 | 1.00E+00 | 2.21E-02 | 1.34E-03 | 1.96E-09 |
| 380.52688 | 27.29  | 12.92 | 17.98 | 14.06 | 17.41 | 1.18E-25  | 6.52E-14 | 6.88E-02 | 7.41E-14 | 2.68E-13 | 6.57E-01 | 7.16E-10 |
| 380.67201 | 46.62  | 17.85 | 17.10 | 17.35 | 16.82 | 1.18E-05  | 1.34E-03 | 6.21E-02 | 6.88E-06 | 6.09E-01 | 5.53E-01 | 5.86E-02 |
| 380.71268 | 27.15  | 14.42 | 22.98 | 12.00 | 11.93 | 1.42E-134 | 3.65E-14 | 3.87E-14 | 3.90E-14 | 3.65E-14 | 3.65E-14 | 9.87E-01 |
| 380.72839 | 33.77  | 15.81 | 18.78 | 17.58 | 17.57 | 2.20E-06  | 4.63E-07 | 5.33E-03 | 8.20E-03 | 1.28E-01 | 1.45E-01 | 1.00E+00 |
| 380.76116 | 44.03  | 17.29 | 18.86 | 18.79 | 18.39 | 7.98E-47  | 3.65E-14 | 3.65E-14 | 4.30E-14 | 8.59E-01 | 1.58E-05 | 3.51E-04 |
| 380.76955 | 48.82  | 16.60 | 15.80 | 16.87 | 17.39 | 5.14E-04  | 1.15E-01 | 8.66E-01 | 1.34E-01 | 1.89E-02 | 2.02E-04 | 5.04E-01 |
| 380.83415 | 44.1   | 15.21 | 17.94 | 19.03 | 17.41 | 3.03E-24  | 1.07E-13 | 4.05E-14 | 1.84E-09 | 6.77E-03 | 4.14E-01 | 2.20E-05 |
| 380.83523 | 162.46 | 9.59  | 14.88 | 13.85 | 14.06 | 5.14E-41  | 3.65E-14 | 3.65E-14 | 3.65E-14 | 1.61E-02 | 1.01E-01 | 9.32E-01 |
| 380.86033 | 40.9   | 12.52 | 15.40 | 11.65 | 16.94 | 5.89E-14  | 1.23E-04 | 5.42E-01 | 3.11E-09 | 5.26E-07 | 1.27E-01 | 4.64E-12 |
| 380.89754 | 46.98  | 15.71 | 16.49 | 16.28 | 16.49 | 1.31E-01  | 1.64E-01 | 4.27E-01 | 1.82E-01 | 9.44E-01 | 1.00E+00 | 9.48E-01 |
| 380.921   | 37.05  | 14.56 | 14.61 | 15.57 | 15.06 | 3.79E-04  | 9.97E-01 | 6.18E-04 | 2.23E-01 | 2.06E-03 | 3.41E-01 | 2.55E-01 |
| 380.93941 | 42.05  | 14.17 | 18.59 | 18.44 | 17.71 | 5.58E-53  | 3.65E-14 | 3.65E-14 | 3.65E-14 | 9.23E-01 | 3.18E-03 | 2.04E-02 |
| 380.95087 | 56.23  | 16.50 | 14.37 | 15.50 | 13.60 | 1.01E-08  | 2.93E-05 | 1.24E-01 | 1.54E-08 | 7.37E-02 | 3.81E-01 | 5.25E-04 |
| 380.97628 | 139.23 | 15.14 | 16.07 | 17.00 | 16.32 | 8.68E-07  | 2.42E-02 | 1.70E-07 | 2.92E-03 | 2.99E-02 | 8.90E-01 | 1.95E-01 |
| 380.98403 | 256.79 | 15.07 | 15.71 | 14.85 | 14.92 | 1.10E-01  | 3.14E-01 | 9.32E-01 | 9.79E-01 | 1.10E-01 | 1.87E-01 | 9.98E-01 |
| 380.99957 | 160.83 | 12.89 | 14.02 | 13.02 | 12.85 | 1.24E-01  | 1.57E-01 | 9.95E-01 | 1.00E+00 | 2.71E-01 | 1.72E-01 | 9.90E-01 |
| 381.03926 | 48.96  | 12.98 | 11.59 | 13.80 | 13.64 | 1.05E-04  | 2.94E-02 | 3.54E-01 | 5.78E-01 | 1.41E-04 | 8.23E-04 | 9.90E-01 |
| 381.07379 | 82.98  | 14.80 | 16.08 | 15.93 | 15.36 | 2.79E-04  | 4.58E-04 | 2.48E-03 | 3.16E-01 | 9.64E-01 | 1.47E-01 | 3.34E-01 |

|           |        |       |       |       |       |          |          |          |          |          |          |          |
|-----------|--------|-------|-------|-------|-------|----------|----------|----------|----------|----------|----------|----------|
| 381.08963 | 222.16 | 15.36 | 22.20 | 22.71 | 20.86 | 2.85E-35 | 3.65E-14 | 3.65E-14 | 7.34E-14 | 7.84E-01 | 8.43E-02 | 5.86E-03 |
| 381.10997 | 46.44  | 16.83 | 16.42 | 16.87 | 16.67 | 4.86E-01 | 5.48E-01 | 9.99E-01 | 9.60E-01 | 4.88E-01 | 8.67E-01 | 9.30E-01 |
| 381.11573 | 63.58  | 14.31 | 15.82 | 15.88 | 15.23 | 1.60E-04 | 7.42E-04 | 3.79E-04 | 1.02E-01 | 9.99E-01 | 4.67E-01 | 3.83E-01 |
| 381.15908 | 43.44  | 15.87 | 15.02 | 15.65 | 16.04 | 4.28E-03 | 1.55E-02 | 8.59E-01 | 9.30E-01 | 1.34E-01 | 4.03E-03 | 5.40E-01 |
| 381.21415 | 30.94  | 12.08 | 21.64 | 12.43 | 13.42 | 8.42E-50 | 3.65E-14 | 9.05E-01 | 6.39E-02 | 3.65E-14 | 3.65E-14 | 2.79E-01 |
| 381.29807 | 42.47  | 19.87 | 16.48 | 17.04 | 16.81 | 1.36E-37 | 3.65E-14 | 3.76E-14 | 3.67E-14 | 9.16E-02 | 5.44E-01 | 7.82E-01 |
| 381.35122 | 24.17  | 17.16 | 12.52 | 13.95 | 13.63 | 4.25E-26 | 3.85E-14 | 9.58E-14 | 7.38E-14 | 1.92E-03 | 3.23E-02 | 8.66E-01 |
| 381.71562 | 26.94  | 15.69 | 19.52 | 15.48 | 14.41 | 2.60E-41 | 3.65E-14 | 8.80E-01 | 2.00E-04 | 3.65E-14 | 3.65E-14 | 3.94E-03 |
| 381.74079 | 26.92  | 17.93 | 21.45 | 19.83 | 21.01 | 1.16E-76 | 3.65E-14 | 3.65E-14 | 3.65E-14 | 3.72E-14 | 7.24E-03 | 7.41E-14 |
| 381.80083 | 49.02  | 14.58 | 13.67 | 15.00 | 13.62 | 9.11E-03 | 2.06E-01 | 8.02E-01 | 1.85E-01 | 2.92E-02 | 1.00E+00 | 2.63E-02 |
| 381.84492 | 46.88  | 17.29 | 15.85 | 15.49 | 16.12 | 3.87E-15 | 4.64E-10 | 8.05E-14 | 1.02E-06 | 3.42E-01 | 6.13E-01 | 2.37E-02 |
| 381.89034 | 55.1   | 16.74 | 17.81 | 18.20 | 17.50 | 5.52E-11 | 1.60E-06 | 2.21E-11 | 1.61E-03 | 2.18E-01 | 4.76E-01 | 5.49E-03 |
| 381.90132 | 90.15  | 13.62 | 16.64 | 16.55 | 16.00 | 5.55E-14 | 7.77E-12 | 2.07E-11 | 1.53E-07 | 9.96E-01 | 4.32E-01 | 5.62E-01 |
| 381.93366 | 64.39  | 16.09 | 15.16 | 16.27 | 14.46 | 1.24E-05 | 6.71E-02 | 9.63E-01 | 2.18E-04 | 2.23E-02 | 3.04E-01 | 4.77E-05 |
| 381.96101 | 113.36 | 14.66 | 15.95 | 15.88 | 16.11 | 4.29E-05 | 7.68E-04 | 1.44E-03 | 1.73E-04 | 9.97E-01 | 9.67E-01 | 9.12E-01 |
| 381.97809 | 52.59  | 17.47 | 16.42 | 16.70 | 16.84 | 1.71E-10 | 8.56E-11 | 2.04E-06 | 2.73E-04 | 2.42E-01 | 3.65E-02 | 8.04E-01 |
| 382.0099  | 66.09  | 13.55 | 13.43 | 15.15 | 13.77 | 4.72E-02 | 9.98E-01 | 7.54E-02 | 9.88E-01 | 6.09E-02 | 9.65E-01 | 2.01E-01 |
| 382.03931 | 65.63  | 15.84 | 16.30 | 16.61 | 16.36 | 5.25E-02 | 3.54E-01 | 3.11E-02 | 2.83E-01 | 7.11E-01 | 9.98E-01 | 8.23E-01 |
| 382.09305 | 233.5  | 12.85 | 18.78 | 19.29 | 17.96 | 1.70E-42 | 3.65E-14 | 3.65E-14 | 3.74E-14 | 6.23E-01 | 2.26E-01 | 1.15E-02 |
| 382.09328 | 112.11 | 11.38 | 13.62 | 13.23 | 14.73 | 4.66E-13 | 3.63E-07 | 3.00E-05 | 2.19E-13 | 7.76E-01 | 4.56E-02 | 2.41E-03 |
| 382.24253 | 24.86  | 17.29 | 20.23 | 18.43 | 19.78 | 6.95E-63 | 3.65E-14 | 7.53E-14 | 3.65E-14 | 3.65E-14 | 6.28E-03 | 7.36E-14 |
| 382.25845 | 23.58  | 16.74 | 16.56 | 16.60 | 15.99 | 6.44E-02 | 9.24E-01 | 9.56E-01 | 4.73E-02 | 9.99E-01 | 2.14E-01 | 1.68E-01 |
| 382.30104 | 46.48  | 17.48 | 13.03 | 13.67 | 13.84 | 5.03E-58 | 3.65E-14 | 3.65E-14 | 3.65E-14 | 2.14E-02 | 2.65E-03 | 8.76E-01 |
| 382.66933 | 46.61  | 16.71 | 15.69 | 15.32 | 14.93 | 3.14E-14 | 1.35E-05 | 1.03E-09 | 1.61E-13 | 3.06E-01 | 4.16E-03 | 3.00E-01 |
| 382.73023 | 25.76  | 13.86 | 16.16 | 11.93 | 13.82 | 5.13E-13 | 2.78E-05 | 5.58E-04 | 1.00E+00 | 1.03E-13 | 6.36E-05 | 1.69E-01 |
| 382.74396 | 25.97  | 14.84 | 16.41 | 12.50 | 15.07 | 9.73E-15 | 1.81E-03 | 6.05E-07 | 9.53E-01 | 7.58E-14 | 1.86E-02 | 2.19E-07 |
| 382.75863 | 46.99  | 17.50 | 18.94 | 18.98 | 18.61 | 7.43E-42 | 3.65E-14 | 3.65E-14 | 5.05E-14 | 9.75E-01 | 8.82E-03 | 2.03E-03 |
| 382.76662 | 48.73  | 17.32 | 17.94 | 17.89 | 18.16 | 1.35E-02 | 8.55E-02 | 1.29E-01 | 1.04E-02 | 9.97E-01 | 8.54E-01 | 7.50E-01 |
| 382.83437 | 36.06  | 15.16 | 16.92 | 18.10 | 16.43 | 1.16E-13 | 5.31E-06 | 8.67E-14 | 2.65E-03 | 5.39E-03 | 5.41E-01 | 4.08E-05 |
| 382.84674 | 34.95  | 17.07 | 15.50 | 16.78 | 16.23 | 1.20E-13 | 2.61E-13 | 4.33E-01 | 2.09E-04 | 3.58E-09 | 2.30E-03 | 3.73E-02 |
| 382.91811 | 35.65  | 15.00 | 16.09 | 16.03 | 16.10 | 1.53E-09 | 1.48E-07 | 6.58E-07 | 2.50E-07 | 9.87E-01 | 1.00E+00 | 9.82E-01 |
| 382.93622 | 283.55 | 17.58 | 12.79 | 13.22 | 13.87 | 2.31E-17 | 7.80E-14 | 3.29E-13 | 1.54E-09 | 8.69E-01 | 2.42E-01 | 6.63E-01 |
| 382.93648 | 47.7   | 13.56 | 15.54 | 15.07 | 13.68 | 2.95E-05 | 2.13E-04 | 7.52E-03 | 9.94E-01 | 7.60E-01 | 1.38E-03 | 2.79E-02 |
| 382.97367 | 44.12  | 16.91 | 14.78 | 15.22 | 15.08 | 3.51E-11 | 2.82E-10 | 5.13E-07 | 1.49E-07 | 4.99E-01 | 7.87E-01 | 9.74E-01 |
| 382.98159 | 239.98 | 15.37 | 16.03 | 14.23 | 15.98 | 2.49E-04 | 4.32E-01 | 4.70E-02 | 5.23E-01 | 4.95E-04 | 1.00E+00 | 1.08E-03 |
| 383.039   | 253.7  | 11.94 | 16.66 | 15.82 | 12.75 | 3.42E-26 | 6.03E-14 | 7.45E-14 | 2.61E-01 | 2.26E-01 | 8.45E-14 | 6.07E-10 |
| 383.04119 | 62.11  | 14.72 | 14.49 | 15.52 | 13.81 | 1.40E-03 | 9.46E-01 | 1.95E-01 | 1.30E-01 | 6.87E-02 | 3.81E-01 | 4.70E-04 |
| 383.07708 | 196.1  | 12.05 | 14.60 | 14.65 | 13.88 | 6.02E-07 | 7.26E-06 | 3.68E-06 | 3.31E-03 | 1.00E+00 | 5.42E-01 | 4.77E-01 |
| 383.0776  | 65.96  | 14.12 | 14.78 | 14.93 | 14.96 | 2.03E-01 | 4.45E-01 | 2.61E-01 | 2.58E-01 | 9.89E-01 | 9.82E-01 | 1.00E+00 |
| 383.08535 | 234.31 | 15.74 | 17.94 | 18.70 | 17.18 | 4.82E-35 | 5.72E-14 | 3.65E-14 | 1.10E-10 | 1.36E-03 | 2.25E-03 | 3.74E-11 |
| 383.13101 | 60.69  | 17.05 | 15.73 | 15.87 | 15.30 | 2.88E-08 | 2.68E-05 | 2.01E-04 | 3.30E-08 | 9.59E-01 | 4.74E-01 | 2.13E-01 |
| 383.15344 | 50.03  | 15.30 | 15.96 | 16.19 | 16.15 | 5.01E-03 | 8.17E-02 | 7.46E-03 | 1.69E-02 | 8.54E-01 | 9.23E-01 | 9.99E-01 |
| 383.16647 | 23.58  | 19.11 | 10.78 | 13.13 | 15.28 | 6.93E-46 | 3.65E-14 | 3.65E-14 | 1.51E-13 | 4.93E-06 | 7.52E-14 | 5.61E-05 |
| 383.18852 | 23.85  | 16.28 | 16.13 | 14.14 | 16.72 | 5.85E-07 | 9.88E-01 | 2.98E-05 | 7.90E-01 | 2.22E-04 | 6.21E-01 | 1.51E-06 |
| 383.21929 | 44.48  | 17.88 | 16.23 | 16.64 | 15.44 | 2.91E-10 | 9.26E-06 | 1.31E-03 | 9.57E-11 | 6.29E-01 | 1.19E-01 | 4.19E-03 |
| 383.26206 | 23.06  | 12.91 | 12.11 | 12.60 | 12.89 | 1.44E-01 | 1.47E-01 | 8.34E-01 | 1.00E+00 | 5.86E-01 | 2.06E-01 | 8.79E-01 |
| 383.27898 | 292.65 | 18.74 | 16.39 | 16.42 | 16.69 | 2.58E-16 | 3.60E-13 | 4.20E-13 | 4.94E-10 | 1.00E+00 | 7.53E-01 | 8.03E-01 |
| 383.31534 | 21.89  | 16.97 | 11.67 | 12.59 | 12.97 | 1.91E-51 | 3.65E-14 | 3.65E-14 | 3.65E-14 | 6.48E-03 | 7.79E-05 | 5.70E-01 |
| 383.31549 | 289.28 | 19.20 | 16.83 | 16.82 | 16.33 | 3.62E-21 | 1.09E-13 | 9.26E-14 | 7.45E-14 | 1.00E+00 | 3.45E-01 | 3.57E-01 |
| 383.33049 | 23.63  | 19.18 | 18.44 | 18.11 | 18.08 | 1.58E-09 | 3.03E-04 | 4.18E-08 | 4.29E-08 | 2.77E-01 | 2.15E-01 | 9.97E-01 |
| 383.33066 | 154.37 | 19.98 | 19.19 | 19.37 | 19.09 | 2.78E-01 | 3.80E-01 | 5.92E-01 | 2.92E-01 | 9.85E-01 | 9.97E-01 | 9.48E-01 |
| 383.36685 | 24.73  | 18.22 | 13.38 | 14.03 | 14.32 | 2.40E-23 | 6.67E-14 | 7.34E-14 | 1.14E-13 | 4.96E-01 | 2.09E-01 | 9.33E-01 |
| 383.36714 | 184.04 | 17.28 | 12.84 | 13.38 | 14.61 | 1.61E-18 | 7.52E-14 | 1.27E-13 | 6.18E-07 | 6.80E-01 | 2.69E-03 | 6.51E-02 |
| 383.73176 | 54.14  | 15.58 | 15.18 | 15.73 | 14.98 | 1.75E-01 | 6.91E-01 | 9.72E-01 | 3.76E-01 | 4.44E-01 | 9.54E-01 | 1.98E-01 |
| 383.73805 | 26.32  | 15.86 | 19.86 | 18.15 | 18.66 | 2.16E-29 | 3.65E-14 | 1.62E-12 | 7.52E-14 | 2.86E-07 | 9.05E-04 | 3.58E-01 |
| 383.8451  | 49.6   | 15.63 | 13.31 | 12.88 | 13.35 | 5.97E-16 | 9.39E-11 | 9.16E-14 | 5.27E-10 | 5.69E-01 | 1.00E+00 | 5.18E-01 |
| 383.86396 | 44.71  | 16.92 | 16.53 | 16.48 | 16.77 | 2.00E-02 | 6.55E-02 | 2.64E-02 | 7.66E-01 | 9.90E-01 | 4.98E-01 | 3.18E-01 |
| 383.87201 | 48.22  | 14.53 | 12.69 | 14.88 | 14.42 | 1.34E-05 | 2.97E-04 | 8.58E-01 | 9.96E-01 | 1.73E-05 | 1.68E-03 | 7.65E-01 |
| 383.92582 | 35.95  | 15.37 | 15.87 | 16.36 | 15.79 | 1.26E-05 | 4.91E-02 | 2.15E-06 | 1.42E-01 | 5.65E-02 | 9.82E-01 | 2.43E-02 |
| 383.93962 | 29.13  | 16.51 | 17.19 | 17.43 | 16.92 | 1.57E-09 | 9.86E-06 | 9.55E-10 | 2.52E-02 | 3.34E-01 | 2.33E-01 | 2.58E-03 |
| 383.97375 | 50.27  | 16.63 | 17.60 | 18.73 | 16.60 | 9.83E-11 | 1.49E-02 | 1.74E-09 | 1.00E+00 | 3.84E-03 | 1.85E-02 | 8.08E-09 |
| 383.999   | 73.6   | 18.19 | 19.29 | 19.86 | 19.09 | 4.54E-17 | 7.90E-09 | 7.39E-14 | 6.08E-06 | 8.95E-03 | 6.85E-01 | 2.05E-04 |
| 384.09938 | 294.56 | 15.17 | 16.01 | 15.04 | 14.89 | 5.05E-04 | 1.21E-02 | 9.64E-01 | 7.34E-01 | 3.40E-03 | 7.06E-04 | 9.46E-01 |
| 384.11513 | 50.33  | 19.09 | 19.78 | 19.90 | 19.77 | 7.62E-04 | 9.36E-03 | 1.11E-03 | 1.29E-02 | 9.41E-01 | 1.00E+00 | 9.39E-01 |
| 384.16989 | 23.36  | 17.02 | 11.05 | 11.58 | 12.29 | 6.29E-80 | 3.65E-14 | 3.65E-14 | 3.65E-14 | 7.21E-02 | 6.86E-07 | 1.02E-02 |
| 384.24015 | 26.01  | 14.67 | 18.64 | 18.51 | 17.89 | 5.72E-53 | 3.65E-14 | 3.65E-14 | 3.65E-14 | 9.34E-01 | 5.95E-03 | 3.15E-02 |
| 384.27396 | 25.4   | 18.81 | 20.12 | 19.78 | 19.45 | 8.25E-10 | 4.52E-10 | 4.91E-06 | 7.93E-03 | 2.89E-01 | 5.41E-03 | 3.60E-01 |
| 384.28258 | 216.57 | 16.71 | 9.59  | 9.95  | 12.14 | 1.12E-31 | 3.67E-14 | 3.74E-14 | 4.32E-13 | 9.20E-01 | 1.19E-04 | 1.18E-03 |

|           |        |       |       |       |       |          |          |          |          |          |          |          |
|-----------|--------|-------|-------|-------|-------|----------|----------|----------|----------|----------|----------|----------|
| 384.3106  | 22.9   | 16.07 | 14.22 | 14.40 | 15.09 | 3.37E-11 | 3.30E-10 | 1.02E-08 | 2.76E-03 | 9.14E-01 | 1.22E-02 | 6.67E-02 |
| 384.33389 | 21.07  | 17.57 | 14.30 | 14.87 | 14.78 | 2.39E-40 | 3.65E-14 | 3.65E-14 | 3.65E-14 | 4.33E-02 | 1.46E-01 | 9.73E-01 |
| 384.33403 | 292.78 | 19.03 | 18.88 | 19.06 | 18.16 | 2.98E-02 | 9.71E-01 | 1.00E+00 | 4.20E-02 | 9.53E-01 | 1.39E-01 | 3.87E-02 |
| 384.33413 | 151.4  | 18.81 | 18.34 | 18.30 | 18.17 | 7.20E-02 | 2.52E-01 | 1.84E-01 | 7.12E-02 | 9.99E-01 | 9.24E-01 | 9.62E-01 |
| 384.74492 | 32.05  | 18.83 | 23.03 | 21.46 | 22.05 | 1.29E-62 | 3.65E-14 | 3.65E-14 | 3.65E-14 | 8.09E-14 | 2.46E-06 | 8.56E-03 |
| 384.75626 | 47.06  | 16.17 | 17.29 | 17.69 | 17.23 | 7.63E-15 | 9.83E-09 | 8.22E-14 | 1.32E-07 | 1.23E-01 | 9.89E-01 | 6.64E-02 |
| 384.76381 | 48.89  | 15.48 | 16.50 | 16.93 | 17.08 | 3.69E-03 | 1.36E-01 | 1.10E-02 | 5.73E-03 | 8.05E-01 | 6.45E-01 | 9.90E-01 |
| 384.80643 | 46.88  | 12.38 | 13.05 | 14.41 | 12.45 | 1.07E-05 | 3.98E-01 | 1.87E-05 | 9.98E-01 | 1.19E-02 | 5.50E-01 | 1.22E-04 |
| 384.84422 | 46.96  | 18.06 | 18.65 | 19.04 | 18.83 | 1.07E-21 | 3.56E-09 | 6.36E-14 | 1.78E-13 | 2.56E-04 | 2.53E-01 | 1.26E-01 |
| 384.92347 | 20.06  | 14.74 | 16.70 | 17.30 | 16.35 | 1.86E-23 | 8.24E-14 | 4.79E-14 | 2.82E-10 | 4.93E-02 | 4.63E-01 | 4.90E-04 |
| 384.9354  | 47.45  | 16.69 | 16.97 | 16.72 | 16.75 | 3.88E-01 | 3.73E-01 | 9.98E-01 | 9.87E-01 | 4.91E-01 | 6.29E-01 | 9.98E-01 |
| 384.9674  | 49.84  | 22.14 | 22.69 | 22.30 | 21.46 | 4.48E-05 | 1.03E-01 | 9.05E-01 | 2.87E-02 | 3.92E-01 | 1.24E-05 | 4.83E-03 |
| 385.11881 | 43.57  | 15.63 | 15.74 | 15.81 | 16.03 | 8.30E-01 | 9.94E-01 | 9.75E-01 | 7.90E-01 | 9.99E-01 | 9.15E-01 | 9.56E-01 |
| 385.12886 | 77.87  | 22.06 | 22.41 | 22.34 | 22.25 | 2.27E-03 | 1.82E-03 | 1.71E-02 | 2.42E-01 | 9.00E-01 | 3.62E-01 | 7.65E-01 |
| 385.18302 | 23.85  | 17.81 | 12.21 | 12.45 | 13.92 | 7.20E-64 | 3.65E-14 | 3.65E-14 | 3.65E-14 | 7.89E-01 | 5.35E-09 | 4.82E-07 |
| 385.24542 | 41.25  | 17.49 | 21.97 | 20.83 | 21.03 | 4.26E-66 | 3.65E-14 | 3.65E-14 | 3.65E-14 | 3.90E-08 | 1.48E-05 | 7.41E-01 |
| 385.27544 | 26.77  | 19.10 | 16.96 | 18.18 | 18.23 | 7.62E-11 | 5.78E-12 | 6.92E-03 | 1.65E-02 | 1.90E-04 | 1.74E-04 | 9.98E-01 |
| 385.34613 | 24.27  | 19.45 | 17.60 | 17.21 | 17.46 | 3.18E-30 | 7.09E-14 | 3.67E-14 | 6.41E-14 | 1.53E-01 | 8.96E-01 | 5.31E-01 |
| 385.34618 | 283.06 | 21.57 | 21.19 | 20.75 | 21.11 | 2.17E-01 | 7.56E-01 | 1.46E-01 | 6.54E-01 | 6.91E-01 | 9.98E-01 | 8.14E-01 |
| 385.34651 | 151.47 | 20.43 | 19.68 | 19.13 | 19.64 | 2.32E-03 | 1.22E-01 | 8.19E-04 | 1.10E-01 | 3.91E-01 | 1.00E+00 | 4.75E-01 |
| 385.57811 | 55.44  | 15.94 | 18.24 | 18.22 | 17.54 | 2.87E-35 | 3.65E-14 | 3.65E-14 | 7.49E-14 | 9.99E-01 | 7.49E-04 | 1.18E-03 |
| 385.75395 | 28.69  | 21.21 | 25.42 | 23.88 | 24.93 | 2.18E-86 | 3.65E-14 | 3.65E-14 | 3.65E-14 | 5.34E-14 | 3.89E-03 | 1.20E-11 |
| 385.83827 | 49.62  | 16.95 | 18.40 | 18.74 | 17.86 | 4.49E-15 | 3.47E-10 | 8.56E-14 | 2.14E-04 | 4.00E-01 | 7.58E-02 | 5.59E-04 |
| 385.86278 | 45.5   | 16.30 | 15.56 | 15.38 | 15.95 | 1.62E-03 | 1.83E-02 | 1.63E-03 | 5.40E-01 | 9.04E-01 | 4.45E-01 | 1.35E-01 |
| 385.91258 | 56.66  | 14.97 | 16.24 | 16.37 | 16.07 | 5.96E-13 | 1.04E-09 | 1.27E-11 | 3.03E-07 | 9.10E-01 | 8.29E-01 | 4.33E-01 |
| 385.92512 | 19.97  | 14.14 | 15.18 | 15.80 | 15.19 | 4.27E-16 | 1.40E-07 | 7.53E-14 | 1.97E-07 | 4.73E-03 | 1.00E+00 | 8.08E-03 |
| 385.95958 | 58.2   | 14.52 | 14.20 | 13.27 | 14.72 | 2.59E-02 | 9.15E-01 | 5.29E-02 | 9.80E-01 | 2.54E-01 | 7.54E-01 | 2.80E-02 |
| 385.97317 | 53.36  | 17.92 | 17.98 | 17.49 | 17.11 | 2.53E-05 | 9.89E-01 | 9.96E-02 | 1.92E-04 | 5.70E-02 | 9.64E-05 | 2.03E-01 |
| 386.00182 | 61.12  | 15.55 | 15.77 | 15.40 | 15.30 | 5.86E-01 | 9.15E-01 | 9.73E-01 | 8.89E-01 | 7.18E-01 | 5.55E-01 | 9.91E-01 |
| 386.01536 | 305.01 | 14.74 | 15.87 | 15.05 | 14.51 | 1.42E-02 | 3.71E-02 | 8.74E-01 | 9.55E-01 | 2.28E-01 | 1.35E-02 | 6.15E-01 |
| 386.0215  | 143.22 | 16.11 | 20.68 | 15.42 | 18.58 | 3.91E-18 | 2.88E-13 | 6.00E-01 | 1.63E-04 | 7.53E-14 | 3.04E-03 | 1.27E-06 |
| 386.04712 | 256.75 | 17.69 | 20.81 | 19.92 | 19.21 | 5.11E-16 | 7.43E-14 | 1.92E-09 | 1.30E-04 | 5.45E-02 | 8.52E-05 | 1.99E-01 |
| 386.08195 | 299.6  | 14.78 | 16.97 | 17.64 | 15.08 | 7.04E-45 | 3.74E-14 | 3.65E-14 | 3.61E-01 | 2.01E-03 | 7.36E-14 | 3.65E-14 |
| 386.12609 | 74.11  | 14.07 | 13.09 | 12.40 | 13.70 | 3.37E-05 | 3.08E-02 | 2.24E-05 | 7.46E-01 | 2.38E-01 | 3.59E-01 | 3.25E-03 |
| 386.13244 | 74     | 19.23 | 19.41 | 19.26 | 19.24 | 2.68E-01 | 2.68E-01 | 9.90E-01 | 9.99E-01 | 4.51E-01 | 3.84E-01 | 9.98E-01 |
| 386.25541 | 29.52  | 20.13 | 24.27 | 22.73 | 23.68 | 8.31E-81 | 3.65E-14 | 3.65E-14 | 3.65E-14 | 6.67E-14 | 5.45E-04 | 4.88E-09 |
| 386.27527 | 24.61  | 17.18 | 11.73 | 14.06 | 13.75 | 2.29E-30 | 3.65E-14 | 3.13E-13 | 8.34E-14 | 1.04E-07 | 1.11E-05 | 8.69E-01 |
| 386.28919 | 23.7   | 19.89 | 21.72 | 20.72 | 20.39 | 7.98E-13 | 2.15E-13 | 1.26E-03 | 1.30E-01 | 1.22E-04 | 3.80E-07 | 4.98E-01 |
| 386.32623 | 23.15  | 18.87 | 18.53 | 18.55 | 18.45 | 2.12E-01 | 3.74E-01 | 4.17E-01 | 2.16E-01 | 1.00E+00 | 9.85E-01 | 9.71E-01 |
| 386.34935 | 288.44 | 19.82 | 18.50 | 18.31 | 18.59 | 9.99E-08 | 1.51E-05 | 3.76E-07 | 9.72E-05 | 8.96E-01 | 9.91E-01 | 7.61E-01 |
| 386.34965 | 22.03  | 17.91 | 14.27 | 14.94 | 15.27 | 2.28E-58 | 3.65E-14 | 3.65E-14 | 3.65E-14 | 8.54E-04 | 3.21E-07 | 2.25E-01 |
| 386.58334 | 300.13 | 13.66 | 14.73 | 15.45 | 12.72 | 3.12E-15 | 2.83E-03 | 5.96E-08 | 1.62E-02 | 9.74E-02 | 1.37E-08 | 8.83E-14 |
| 386.70995 | 50.24  | 18.39 | 18.39 | 18.51 | 18.16 | 1.84E-01 | 1.00E+00 | 8.62E-01 | 4.41E-01 | 8.65E-01 | 4.81E-01 | 1.26E-01 |
| 386.75974 | 30.55  | 19.02 | 22.04 | 20.66 | 22.22 | 2.58E-44 | 3.65E-14 | 8.32E-14 | 3.65E-14 | 2.22E-10 | 8.00E-01 | 2.60E-12 |
| 386.84194 | 46.75  | 17.21 | 17.99 | 18.71 | 18.28 | 2.22E-37 | 2.17E-13 | 3.65E-14 | 6.03E-14 | 9.49E-12 | 2.30E-02 | 9.25E-05 |
| 386.89481 | 51.02  | 14.53 | 15.87 | 16.74 | 15.14 | 1.19E-04 | 3.67E-02 | 6.02E-05 | 6.26E-01 | 3.12E-01 | 5.07E-01 | 1.22E-02 |
| 386.90177 | 25.44  | 13.78 | 12.21 | 14.23 | 13.16 | 4.04E-06 | 2.86E-04 | 6.38E-01 | 3.86E-01 | 2.87E-06 | 8.63E-02 | 4.02E-02 |
| 386.93272 | 46.7   | 16.35 | 15.25 | 16.07 | 16.03 | 5.21E-05 | 2.09E-05 | 6.04E-01 | 5.47E-01 | 3.73E-03 | 8.31E-03 | 9.99E-01 |
| 386.94284 | 61.15  | 16.66 | 15.01 | 16.77 | 15.63 | 3.65E-08 | 2.10E-06 | 9.83E-01 | 8.78E-03 | 6.84E-07 | 2.45E-01 | 3.56E-03 |
| 386.96292 | 73.31  | 19.03 | 19.78 | 19.54 | 18.93 | 1.31E-06 | 6.93E-05 | 1.32E-02 | 9.37E-01 | 4.90E-01 | 1.74E-05 | 3.64E-03 |
| 386.97314 | 55.23  | 16.24 | 16.24 | 16.16 | 15.30 | 5.73E-03 | 1.00E+00 | 9.90E-01 | 9.32E-03 | 9.92E-01 | 1.34E-02 | 2.76E-02 |
| 386.98594 | 66.26  | 16.66 | 19.82 | 19.82 | 18.61 | 8.87E-33 | 3.67E-14 | 3.65E-14 | 2.99E-12 | 1.00E+00 | 3.24E-05 | 2.64E-05 |
| 387.0011  | 278.07 | 18.07 | 19.35 | 19.95 | 19.17 | 6.12E-05 | 8.26E-03 | 2.08E-05 | 3.79E-02 | 4.58E-01 | 9.75E-01 | 2.50E-01 |
| 387.00957 | 273.02 | 14.62 | 16.84 | 17.21 | 15.91 | 2.11E-16 | 1.00E-11 | 7.57E-14 | 1.99E-04 | 6.04E-01 | 1.73E-02 | 2.23E-04 |
| 387.02171 | 138.49 | 13.19 | 14.30 | 10.71 | 12.31 | 5.51E-10 | 1.23E-01 | 7.09E-06 | 3.27E-01 | 1.93E-10 | 1.36E-03 | 1.35E-02 |
| 387.03013 | 138.04 | 11.80 | 17.27 | 13.31 | 14.59 | 6.74E-23 | 4.67E-14 | 8.90E-03 | 2.26E-07 | 2.44E-13 | 1.43E-06 | 5.28E-02 |
| 387.03483 | 56.43  | 15.70 | 16.62 | 15.77 | 16.55 | 4.47E-02 | 1.12E-01 | 9.98E-01 | 1.76E-01 | 1.80E-01 | 9.99E-01 | 2.64E-01 |
| 387.0508  | 251.66 | 13.40 | 16.50 | 15.06 | 14.80 | 3.40E-19 | 6.85E-14 | 1.91E-07 | 3.20E-05 | 1.88E-05 | 7.21E-07 | 8.29E-01 |
| 387.12469 | 74.11  | 17.34 | 17.03 | 16.43 | 17.04 | 5.24E-09 | 1.07E-01 | 9.38E-10 | 1.60E-01 | 1.68E-04 | 9.99E-01 | 1.54E-04 |
| 387.17978 | 24.47  | 17.59 | 16.09 | 16.87 | 17.28 | 2.85E-09 | 1.32E-09 | 8.11E-03 | 5.38E-01 | 4.60E-03 | 7.41E-06 | 3.14E-01 |
| 387.1993  | 34.68  | 16.83 | 11.84 | 11.62 | 12.64 | 1.79E-46 | 3.65E-14 | 3.65E-14 | 3.65E-14 | 9.10E-01 | 7.62E-02 | 1.20E-02 |
| 387.26258 | 25.18  | 17.88 | 20.55 | 19.29 | 20.84 | 2.66E-42 | 3.65E-14 | 1.12E-12 | 3.65E-14 | 6.92E-10 | 4.45E-01 | 2.93E-13 |
| 387.29197 | 23.67  | 17.95 | 19.27 | 18.05 | 17.83 | 5.61E-09 | 2.53E-07 | 9.73E-01 | 9.56E-01 | 3.86E-06 | 9.92E-08 | 7.99E-01 |
| 387.32953 | 23.01  | 16.10 | 14.58 | 15.36 | 15.55 | 2.56E-04 | 6.59E-05 | 1.26E-01 | 3.86E-01 | 1.11E-01 | 3.68E-02 | 9.54E-01 |
| 387.53677 | 56.25  | 13.67 | 14.59 | 13.16 | 14.76 | 2.52E-03 | 1.91E-01 | 6.84E-01 | 1.02E-01 | 1.46E-02 | 9.87E-01 | 6.32E-03 |
| 387.70562 | 48.29  | 15.48 | 17.60 | 13.81 | 13.82 | 2.33E-33 | 4.98E-12 | 3.27E-08 | 1.24E-07 | 3.65E-14 | 3.67E-14 | 1.00E+00 |
| 387.75035 | 26.95  | 16.40 | 19.44 | 17.78 | 18.60 | 6.92E-26 | 3.74E-14 | 2.86E-07 | 8.18E-14 | 2.78E-09 | 8.42E-03 | 1.05E-02 |
| 387.76561 | 24.13  | 16.64 | 18.13 | 16.97 | 18.33 | 4.64E-12 | 5.83E-08 | 5.44E-01 | 1.51E-09 | 5.59E-05 | 8.56E-01 | 2.39E-06 |

|           |        |       |       |       |       |           |          |          |          |          |          |          |
|-----------|--------|-------|-------|-------|-------|-----------|----------|----------|----------|----------|----------|----------|
| 387.78617 | 306.54 | 15.56 | 16.68 | 16.35 | 16.01 | 5.28E-07  | 2.87E-07 | 3.84E-04 | 1.18E-01 | 3.88E-01 | 9.20E-03 | 3.51E-01 |
| 387.83552 | 49.79  | 16.85 | 18.05 | 18.38 | 17.44 | 1.17E-11  | 2.53E-07 | 2.36E-11 | 3.38E-02 | 4.04E-01 | 3.60E-02 | 1.80E-04 |
| 387.98858 | 91.29  | 13.52 | 15.11 | 14.84 | 13.13 | 2.82E-07  | 2.23E-04 | 2.80E-03 | 7.48E-01 | 9.02E-01 | 9.13E-06 | 1.43E-04 |
| 387.99639 | 299.23 | 14.49 | 17.56 | 17.90 | 15.78 | 1.27E-39  | 3.65E-14 | 3.65E-14 | 5.61E-07 | 4.61E-01 | 1.77E-11 | 7.35E-14 |
| 388.00481 | 182.84 | 10.91 | 14.43 | 14.21 | 12.64 | 2.80E-07  | 1.62E-06 | 6.43E-06 | 5.60E-02 | 9.88E-01 | 5.60E-02 | 1.15E-01 |
| 388.0138  | 184.78 | 13.73 | 15.28 | 14.44 | 14.21 | 1.00E-05  | 2.35E-06 | 7.79E-02 | 4.01E-01 | 3.05E-02 | 4.09E-03 | 8.78E-01 |
| 388.02459 | 135.19 | 15.13 | 16.01 | 12.56 | 14.11 | 9.63E-20  | 3.89E-02 | 1.04E-12 | 1.55E-02 | 7.36E-14 | 8.06E-07 | 6.96E-05 |
| 388.03105 | 264.28 | 12.64 | 12.89 | 15.56 | 12.11 | 1.43E-10  | 9.54E-01 | 4.78E-08 | 7.27E-01 | 1.71E-06 | 4.41E-01 | 1.18E-09 |
| 388.07678 | 127.98 | 16.21 | 17.10 | 18.26 | 16.49 | 7.19E-17  | 6.58E-04 | 7.25E-14 | 6.34E-01 | 5.29E-06 | 5.43E-02 | 8.61E-12 |
| 388.10939 | 274.95 | 14.99 | 17.93 | 17.85 | 17.16 | 3.95E-29  | 3.94E-14 | 4.19E-14 | 8.60E-14 | 9.91E-01 | 1.80E-02 | 3.82E-02 |
| 388.12133 | 307.31 | 14.42 | 14.54 | 14.36 | 13.91 | 5.81E-04  | 8.62E-01 | 9.68E-01 | 4.30E-03 | 6.23E-01 | 4.23E-04 | 2.13E-02 |
| 388.25325 | 26.21  | 20.11 | 18.18 | 16.86 | 18.33 | 1.45E-41  | 7.25E-14 | 3.65E-14 | 7.43E-14 | 2.35E-10 | 8.75E-01 | 7.10E-12 |
| 388.30563 | 23.82  | 20.29 | 22.34 | 20.90 | 20.64 | 6.88E-17  | 7.31E-14 | 3.03E-02 | 4.02E-01 | 5.14E-09 | 3.40E-11 | 6.96E-01 |
| 388.57597 | 57     | 13.43 | 14.98 | 15.03 | 15.26 | 7.46E-04  | 9.12E-03 | 5.97E-03 | 1.90E-03 | 1.00E+00 | 9.52E-01 | 9.72E-01 |
| 388.61099 | 270.48 | 15.29 | 14.91 | 16.53 | 14.78 | 2.02E-09  | 5.08E-01 | 3.58E-05 | 2.65E-01 | 1.11E-07 | 9.68E-01 | 2.07E-08 |
| 388.70735 | 47.43  | 19.18 | 22.38 | 19.47 | 19.09 | 3.80E-50  | 3.65E-14 | 3.73E-01 | 9.68E-01 | 3.65E-14 | 3.65E-14 | 2.03E-01 |
| 388.73033 | 27.2   | 15.74 | 18.98 | 17.41 | 18.21 | 8.40E-17  | 7.33E-14 | 1.31E-05 | 2.94E-10 | 1.01E-04 | 1.59E-01 | 1.33E-01 |
| 388.74818 | 43.51  | 16.81 | 15.09 | 16.98 | 16.36 | 2.42E-08  | 6.18E-07 | 9.45E-01 | 4.97E-01 | 7.79E-08 | 9.45E-04 | 2.32E-01 |
| 388.83999 | 41.24  | 15.04 | 14.87 | 16.10 | 15.56 | 1.02E-05  | 9.17E-01 | 1.79E-04 | 1.87E-01 | 2.19E-05 | 5.41E-02 | 1.73E-01 |
| 388.92959 | 142.24 | 12.15 | 11.10 | 13.59 | 11.56 | 2.67E-03  | 3.91E-01 | 1.32E-01 | 8.27E-01 | 1.83E-03 | 9.10E-01 | 2.17E-02 |
| 388.98329 | 75.7   | 14.91 | 16.43 | 16.14 | 15.65 | 3.16E-06  | 3.37E-06 | 2.07E-04 | 7.45E-02 | 7.78E-01 | 6.09E-02 | 3.77E-01 |
| 389.0155  | 57.53  | 16.79 | 15.64 | 16.37 | 15.82 | 1.46E-07  | 4.22E-07 | 1.62E-01 | 4.11E-05 | 3.96E-03 | 8.52E-01 | 5.72E-02 |
| 389.1039  | 71.21  | 15.76 | 17.47 | 17.63 | 17.85 | 1.64E-12  | 5.93E-08 | 2.25E-09 | 1.03E-10 | 9.53E-01 | 5.96E-01 | 8.78E-01 |
| 389.1214  | 88.1   | 15.22 | 17.74 | 15.87 | 16.51 | 3.04E-08  | 1.08E-08 | 3.73E-01 | 1.05E-02 | 4.83E-05 | 2.17E-02 | 4.16E-01 |
| 389.13166 | 271.24 | 17.78 | 19.80 | 21.97 | 19.83 | 1.95E-12  | 6.67E-04 | 1.81E-13 | 7.73E-04 | 3.17E-04 | 1.00E+00 | 5.97E-04 |
| 389.13417 | 58.11  | 17.70 | 16.53 | 17.01 | 16.30 | 8.63E-12  | 1.82E-08 | 1.70E-03 | 4.34E-11 | 6.54E-02 | 6.38E-01 | 2.09E-03 |
| 389.17967 | 75.37  | 16.56 | 17.06 | 16.55 | 16.93 | 1.04E-01  | 1.79E-01 | 1.00E+00 | 4.58E-01 | 1.86E-01 | 9.60E-01 | 4.61E-01 |
| 389.20302 | 48.07  | 14.62 | 13.44 | 16.38 | 17.03 | 8.01E-17  | 1.52E-02 | 5.68E-05 | 5.67E-08 | 2.69E-11 | 8.05E-14 | 4.04E-01 |
| 389.21193 | 27.35  | 12.04 | 20.89 | 11.75 | 10.83 | 2.04E-64  | 3.65E-14 | 9.10E-01 | 3.59E-02 | 3.65E-14 | 3.65E-14 | 1.82E-01 |
| 389.23208 | 25.73  | 14.78 | 15.81 | 15.94 | 17.02 | 2.47E-05  | 7.94E-02 | 3.36E-02 | 4.63E-06 | 9.90E-01 | 4.14E-02 | 8.22E-02 |
| 389.25651 | 29.01  | 17.27 | 10.01 | 11.83 | 12.18 | 4.34E-39  | 3.65E-14 | 3.83E-14 | 6.05E-14 | 6.46E-04 | 5.68E-05 | 8.84E-01 |
| 389.30777 | 23.44  | 18.00 | 19.98 | 18.45 | 18.30 | 9.42E-18  | 7.44E-14 | 1.37E-01 | 4.96E-01 | 8.15E-11 | 6.32E-12 | 9.10E-01 |
| 389.71234 | 27.68  | 14.68 | 16.50 | 14.39 | 12.40 | 1.11E-18  | 1.17E-05 | 8.56E-01 | 5.16E-08 | 5.05E-07 | 7.18E-14 | 4.37E-06 |
| 389.71843 | 26.78  | 17.54 | 20.04 | 17.31 | 17.12 | 1.39E-116 | 3.65E-14 | 2.26E-03 | 8.61E-09 | 3.65E-14 | 3.65E-14 | 2.93E-02 |
| 389.72801 | 24.33  | 17.66 | 11.73 | 12.78 | 12.93 | 2.43E-42  | 3.65E-14 | 3.65E-14 | 3.67E-14 | 2.52E-02 | 1.07E-02 | 9.81E-01 |
| 389.73825 | 24.51  | 17.14 | 20.54 | 18.87 | 20.07 | 2.31E-73  | 3.65E-14 | 3.65E-14 | 3.65E-14 | 3.67E-14 | 3.99E-03 | 7.49E-14 |
| 389.76498 | 23.72  | 15.24 | 13.43 | 17.88 | 15.16 | 9.77E-27  | 9.91E-07 | 7.47E-13 | 9.95E-01 | 3.65E-14 | 1.28E-05 | 2.49E-12 |
| 389.83218 | 49.45  | 14.25 | 15.54 | 15.63 | 14.52 | 3.01E-05  | 9.80E-04 | 3.05E-04 | 8.70E-01 | 9.94E-01 | 2.32E-02 | 1.02E-02 |
| 389.86277 | 44.7   | 16.32 | 14.43 | 15.11 | 15.35 | 3.96E-10  | 6.59E-11 | 3.91E-05 | 2.46E-03 | 5.69E-02 | 5.88E-03 | 8.22E-01 |
| 389.88404 | 41.62  | 17.67 | 17.29 | 17.05 | 17.11 | 3.12E-06  | 1.36E-02 | 4.91E-06 | 1.11E-04 | 2.19E-01 | 5.28E-01 | 9.56E-01 |
| 389.9219  | 53.35  | 19.82 | 19.13 | 19.38 | 18.60 | 1.64E-10  | 1.78E-04 | 3.06E-02 | 2.84E-11 | 4.53E-01 | 1.29E-02 | 5.57E-05 |
| 390.01145 | 59.52  | 18.50 | 19.13 | 19.31 | 18.42 | 3.97E-06  | 6.93E-03 | 1.79E-04 | 9.81E-01 | 7.89E-01 | 3.73E-03 | 1.04E-04 |
| 390.13537 | 222.87 | 16.54 | 18.64 | 18.29 | 18.28 | 4.01E-22  | 7.07E-14 | 7.95E-14 | 1.14E-13 | 3.27E-01 | 3.46E-01 | 1.00E+00 |
| 390.21831 | 55.89  | 15.16 | 18.99 | 17.47 | 16.17 | 1.05E-37  | 3.65E-14 | 7.47E-14 | 3.64E-04 | 2.71E-08 | 6.01E-14 | 4.17E-06 |
| 390.24005 | 26.05  | 16.21 | 19.14 | 17.42 | 18.71 | 3.59E-33  | 3.65E-14 | 2.14E-07 | 4.74E-14 | 9.96E-13 | 2.30E-01 | 1.65E-07 |
| 390.26534 | 26.14  | 15.06 | 12.15 | 16.84 | 13.90 | 1.04E-24  | 3.44E-12 | 2.12E-05 | 1.68E-02 | 3.87E-14 | 1.22E-04 | 1.71E-11 |
| 390.3118  | 23.25  | 13.92 | 14.80 | 11.74 | 12.32 | 2.36E-11  | 1.80E-01 | 4.48E-06 | 2.08E-03 | 3.08E-10 | 9.10E-07 | 5.83E-01 |
| 390.57778 | 284.65 | 16.09 | 18.44 | 19.72 | 18.09 | 8.41E-41  | 5.70E-14 | 3.65E-14 | 7.48E-14 | 7.66E-08 | 4.14E-01 | 2.73E-11 |
| 390.66762 | 29.88  | 15.63 | 15.39 | 17.28 | 16.91 | 2.15E-10  | 8.57E-01 | 5.33E-07 | 3.13E-04 | 2.46E-08 | 2.25E-05 | 6.32E-01 |
| 390.70471 | 48.34  | 18.62 | 18.96 | 18.88 | 18.65 | 2.12E-01  | 2.64E-01 | 5.20E-01 | 9.99E-01 | 9.68E-01 | 3.90E-01 | 6.59E-01 |
| 390.71958 | 43.62  | 14.78 | 17.82 | 17.05 | 14.48 | 7.13E-18  | 1.13E-12 | 7.09E-08 | 8.67E-01 | 2.17E-01 | 2.25E-13 | 7.42E-09 |
| 390.74567 | 40.55  | 17.20 | 17.82 | 17.57 | 17.65 | 6.32E-02  | 4.31E-02 | 3.87E-01 | 2.39E-01 | 7.22E-01 | 9.06E-01 | 9.86E-01 |
| 390.76483 | 27.41  | 15.12 | 17.34 | 15.08 | 17.05 | 6.54E-16  | 4.79E-11 | 9.99E-01 | 2.36E-08 | 6.54E-11 | 8.15E-01 | 2.66E-08 |
| 390.77322 | 46.72  | 17.46 | 19.52 | 20.61 | 19.72 | 1.22E-44  | 4.19E-14 | 3.65E-14 | 3.70E-14 | 3.01E-08 | 6.99E-01 | 1.42E-05 |
| 390.79048 | 46.86  | 16.81 | 18.58 | 18.71 | 18.38 | 2.46E-34  | 3.72E-14 | 3.65E-14 | 6.43E-14 | 8.09E-01 | 5.34E-01 | 1.19E-01 |
| 390.79846 | 48.62  | 16.94 | 18.52 | 18.50 | 18.64 | 5.53E-11  | 4.04E-08 | 4.99E-08 | 8.13E-09 | 1.00E+00 | 9.72E-01 | 9.51E-01 |
| 390.87923 | 42.34  | 17.50 | 17.02 | 16.24 | 16.64 | 1.52E-05  | 2.30E-01 | 6.48E-06 | 6.13E-03 | 1.62E-02 | 4.99E-01 | 4.37E-01 |
| 390.91506 | 51.04  | 20.74 | 22.46 | 22.69 | 21.89 | 7.34E-16  | 7.41E-12 | 8.26E-14 | 1.16E-05 | 7.71E-01 | 8.39E-02 | 5.41E-03 |
| 390.99151 | 56.35  | 16.89 | 13.77 | 13.98 | 13.70 | 5.76E-20  | 7.33E-14 | 1.19E-13 | 7.55E-14 | 9.33E-01 | 9.98E-01 | 8.74E-01 |
| 391.02432 | 60.07  | 20.54 | 19.17 | 20.27 | 18.87 | 5.78E-22  | 2.98E-13 | 3.79E-01 | 7.52E-14 | 6.86E-09 | 3.41E-01 | 9.03E-13 |
| 391.07781 | 289.89 | 13.89 | 15.44 | 16.71 | 15.21 | 1.35E-14  | 1.18E-05 | 7.56E-14 | 4.05E-04 | 6.85E-04 | 9.03E-01 | 6.16E-05 |
| 391.105   | 303.02 | 15.13 | 15.13 | 15.33 | 14.56 | 3.55E-02  | 1.00E+00 | 8.62E-01 | 1.34E-01 | 8.80E-01 | 1.50E-01 | 2.36E-02 |
| 391.17935 | 31.78  | 15.28 | 16.61 | 15.48 | 18.78 | 3.69E-11  | 3.29E-02 | 9.75E-01 | 1.55E-10 | 1.08E-01 | 2.08E-04 | 3.69E-09 |
| 391.18786 | 31.09  | 16.30 | 16.60 | 16.62 | 16.95 | 4.26E-01  | 8.58E-01 | 8.30E-01 | 3.31E-01 | 1.00E+00 | 8.10E-01 | 8.30E-01 |
| 391.22054 | 39.79  | 10.73 | 16.38 | 17.18 | 14.76 | 3.48E-23  | 7.43E-14 | 6.14E-14 | 2.17E-09 | 5.55E-01 | 5.45E-02 | 8.56E-04 |
| 391.24781 | 25.33  | 14.37 | 17.22 | 14.53 | 17.15 | 1.55E-16  | 3.02E-11 | 9.74E-01 | 2.43E-10 | 9.19E-10 | 9.99E-01 | 5.77E-09 |
| 391.2745  | 38.88  | 16.16 | 18.49 | 19.69 | 18.55 | 1.73E-38  | 6.67E-14 | 3.65E-14 | 6.65E-14 | 1.41E-06 | 9.94E-01 | 9.14E-06 |
| 391.28396 | 280.72 | 22.74 | 22.95 | 22.75 | 22.10 | 8.88E-02  | 9.22E-01 | 1.00E+00 | 2.20E-01 | 9.30E-01 | 6.87E-02 | 2.34E-01 |

|           |        |       |       |       |       |           |          |          |          |          |          |          |
|-----------|--------|-------|-------|-------|-------|-----------|----------|----------|----------|----------|----------|----------|
| 391.28414 | 161.29 | 21.80 | 19.63 | 19.99 | 18.98 | 1.60E-09  | 2.79E-06 | 1.09E-04 | 2.19E-09 | 8.36E-01 | 4.64E-01 | 1.04E-01 |
| 391.4376  | 263.58 | 14.94 | 15.11 | 16.02 | 14.95 | 2.45E-06  | 8.70E-01 | 9.32E-06 | 1.00E+00 | 4.48E-04 | 9.11E-01 | 4.26E-05 |
| 391.57556 | 81.8   | 12.38 | 13.42 | 13.63 | 13.47 | 4.11E-02  | 1.41E-01 | 4.73E-02 | 1.27E-01 | 9.74E-01 | 1.00E+00 | 9.89E-01 |
| 391.75379 | 26.92  | 15.43 | 18.56 | 16.97 | 18.25 | 2.62E-22  | 7.16E-14 | 2.99E-06 | 7.29E-14 | 2.59E-06 | 7.57E-01 | 3.55E-04 |
| 391.77201 | 25.92  | 14.42 | 18.27 | 17.32 | 17.35 | 9.69E-29  | 3.67E-14 | 7.38E-14 | 7.36E-14 | 1.28E-02 | 2.43E-02 | 9.99E-01 |
| 391.78231 | 44.83  | 18.85 | 18.08 | 19.08 | 18.14 | 1.33E-06  | 1.64E-03 | 6.75E-01 | 5.73E-03 | 2.91E-05 | 9.94E-01 | 1.45E-04 |
| 391.85942 | 43.64  | 16.18 | 16.03 | 14.79 | 15.51 | 1.22E-06  | 9.46E-01 | 1.79E-06 | 6.70E-02 | 4.72E-05 | 2.41E-01 | 5.26E-01 |
| 391.87907 | 46.61  | 17.00 | 16.34 | 16.09 | 16.06 | 8.16E-11  | 3.07E-05 | 3.46E-09 | 4.96E-09 | 3.21E-01 | 2.71E-01 | 9.99E-01 |
| 391.89892 | 87.77  | 15.29 | 14.25 | 12.80 | 16.29 | 1.13E-16  | 2.31E-02 | 2.19E-10 | 3.74E-02 | 6.38E-04 | 1.46E-06 | 7.45E-14 |
| 391.91858 | 51.84  | 17.38 | 17.58 | 17.91 | 17.20 | 6.87E-04  | 6.32E-01 | 1.03E-02 | 7.03E-01 | 2.43E-01 | 1.34E-01 | 4.65E-04 |
| 391.94406 | 49.39  | 17.97 | 16.04 | 17.58 | 17.11 | 7.34E-07  | 3.70E-07 | 6.78E-01 | 7.36E-02 | 1.03E-04 | 1.93E-02 | 5.49E-01 |
| 392.02183 | 39.38  | 15.32 | 15.06 | 16.22 | 14.34 | 8.17E-04  | 9.33E-01 | 1.51E-01 | 1.25E-01 | 4.49E-02 | 3.96E-01 | 2.73E-04 |
| 392.0343  | 163.25 | 13.29 | 14.66 | 11.86 | 13.68 | 1.59E-03  | 1.93E-01 | 1.60E-01 | 9.44E-01 | 5.66E-04 | 5.37E-01 | 6.02E-02 |
| 392.05587 | 95.02  | 10.54 | 15.60 | 12.95 | 14.01 | 4.06E-16  | 7.47E-14 | 7.76E-05 | 1.62E-08 | 2.21E-05 | 3.27E-02 | 2.49E-01 |
| 392.09518 | 104.1  | 12.74 | 16.39 | 14.71 | 15.17 | 2.71E-14  | 7.93E-14 | 2.25E-05 | 3.02E-07 | 7.06E-04 | 3.28E-02 | 7.24E-01 |
| 392.11641 | 100.85 | 15.84 | 19.33 | 18.07 | 18.12 | 1.14E-12  | 3.62E-13 | 2.60E-06 | 3.86E-06 | 2.58E-02 | 4.33E-02 | 1.00E+00 |
| 392.22955 | 24.1   | 16.37 | 20.88 | 19.54 | 19.92 | 1.57E-50  | 3.65E-14 | 3.65E-14 | 3.65E-14 | 3.69E-07 | 7.64E-04 | 4.12E-01 |
| 392.25494 | 24.61  | 12.89 | 16.83 | 16.77 | 16.64 | 3.84E-13  | 2.29E-10 | 2.87E-10 | 4.05E-09 | 1.00E+00 | 9.89E-01 | 9.96E-01 |
| 392.28183 | 46.16  | 17.85 | 17.24 | 18.13 | 17.78 | 3.39E-03  | 4.59E-02 | 6.30E-01 | 9.91E-01 | 1.46E-03 | 1.29E-01 | 4.91E-01 |
| 392.65142 | 45.82  | 17.79 | 16.50 | 16.67 | 16.33 | 1.13E-13  | 3.42E-10 | 3.78E-08 | 5.70E-12 | 8.14E-01 | 8.35E-01 | 3.22E-01 |
| 392.70312 | 50.07  | 17.17 | 17.37 | 17.12 | 17.22 | 7.38E-01  | 8.26E-01 | 9.94E-01 | 9.98E-01 | 7.01E-01 | 9.22E-01 | 9.75E-01 |
| 392.73193 | 24.54  | 18.09 | 19.99 | 18.55 | 19.40 | 1.75E-25  | 4.30E-14 | 2.54E-02 | 1.22E-12 | 8.26E-14 | 4.05E-03 | 7.42E-06 |
| 392.74309 | 38.41  | 17.38 | 17.28 | 16.17 | 15.56 | 1.56E-10  | 9.87E-01 | 1.19E-04 | 7.42E-09 | 7.87E-04 | 1.16E-07 | 1.58E-01 |
| 392.76179 | 26.89  | 15.00 | 18.38 | 17.20 | 18.14 | 1.85E-28  | 3.81E-14 | 5.12E-13 | 5.85E-14 | 2.79E-04 | 8.47E-01 | 7.89E-03 |
| 392.7867  | 45.49  | 16.87 | 18.34 | 18.58 | 18.19 | 7.81E-33  | 4.45E-14 | 3.65E-14 | 7.48E-14 | 2.50E-01 | 6.73E-01 | 1.85E-02 |
| 392.79555 | 48.09  | 17.47 | 18.97 | 18.90 | 19.03 | 2.43E-10  | 5.96E-08 | 1.86E-07 | 3.82E-08 | 9.93E-01 | 9.96E-01 | 9.61E-01 |
| 392.87856 | 37.22  | 17.94 | 16.75 | 16.38 | 16.56 | 4.64E-16  | 3.55E-09 | 8.35E-14 | 3.07E-11 | 1.96E-01 | 7.73E-01 | 7.66E-01 |
| 392.91214 | 51.75  | 19.68 | 21.26 | 21.52 | 20.70 | 8.64E-16  | 2.24E-11 | 8.07E-14 | 3.34E-05 | 6.19E-01 | 7.34E-02 | 1.91E-03 |
| 392.95063 | 58.36  | 18.32 | 16.59 | 18.77 | 17.12 | 1.39E-12  | 8.86E-08 | 4.02E-01 | 5.96E-04 | 4.03E-11 | 3.14E-01 | 1.38E-06 |
| 393.00767 | 61.25  | 15.88 | 15.95 | 16.72 | 15.36 | 1.05E-04  | 9.94E-01 | 1.26E-02 | 2.73E-01 | 3.49E-02 | 1.93E-01 | 3.11E-05 |
| 393.01813 | 198.54 | 15.15 | 14.85 | 15.92 | 15.69 | 9.12E-02  | 9.05E-01 | 3.21E-01 | 6.51E-01 | 9.71E-02 | 2.91E-01 | 9.64E-01 |
| 393.05843 | 255.04 | 13.60 | 13.77 | 14.94 | 12.65 | 7.41E-05  | 9.83E-01 | 1.74E-02 | 1.76E-01 | 6.09E-02 | 9.52E-02 | 1.76E-05 |
| 393.1192  | 95.94  | 19.71 | 22.37 | 21.40 | 21.39 | 3.45E-18  | 7.51E-14 | 4.57E-09 | 2.06E-08 | 2.59E-03 | 3.26E-03 | 1.00E+00 |
| 393.222   | 25.04  | 18.62 | 15.35 | 14.24 | 16.84 | 3.71E-24  | 8.76E-14 | 4.43E-14 | 5.34E-05 | 2.50E-02 | 1.71E-03 | 3.61E-09 |
| 393.23537 | 262.74 | 18.52 | 14.52 | 13.09 | 14.83 | 1.15E-23  | 1.07E-13 | 4.59E-14 | 7.10E-12 | 1.95E-02 | 9.25E-01 | 3.29E-03 |
| 393.23574 | 124.47 | 18.46 | 16.70 | 17.40 | 16.75 | 6.36E-05  | 1.65E-04 | 4.91E-02 | 4.29E-04 | 3.45E-01 | 9.99E-01 | 4.40E-01 |
| 393.28725 | 24.47  | 22.17 | 21.95 | 22.24 | 21.52 | 1.69E-02  | 7.87E-01 | 9.90E-01 | 3.24E-02 | 6.25E-01 | 2.83E-01 | 1.71E-02 |
| 393.29751 | 55.9   | 20.85 | 20.27 | 20.55 | 20.22 | 2.88E-21  | 7.36E-14 | 9.56E-06 | 7.39E-14 | 1.40E-04 | 8.81E-01 | 8.55E-06 |
| 393.71925 | 45     | 16.12 | 18.01 | 14.53 | 14.90 | 2.44E-50  | 6.96E-14 | 7.46E-14 | 1.69E-09 | 3.65E-14 | 3.65E-14 | 1.96E-01 |
| 393.73989 | 29.61  | 21.05 | 22.17 | 21.01 | 22.14 | 9.67E-23  | 9.14E-14 | 9.94E-01 | 2.98E-13 | 8.62E-14 | 9.97E-01 | 2.28E-13 |
| 393.75013 | 25.02  | 14.02 | 16.91 | 17.89 | 15.87 | 5.92E-11  | 1.13E-06 | 3.45E-11 | 5.22E-03 | 2.81E-01 | 2.61E-01 | 2.25E-03 |
| 393.78044 | 49.13  | 18.74 | 17.85 | 18.12 | 16.92 | 4.88E-05  | 6.80E-02 | 3.08E-01 | 1.16E-05 | 8.85E-01 | 7.85E-02 | 1.03E-02 |
| 393.89272 | 44.66  | 16.39 | 16.34 | 16.10 | 16.66 | 3.35E-02  | 9.92E-01 | 3.54E-01 | 4.49E-01 | 5.53E-01 | 3.23E-01 | 1.56E-02 |
| 393.91526 | 50.96  | 15.54 | 15.41 | 15.65 | 15.41 | 7.58E-01  | 9.57E-01 | 9.72E-01 | 9.54E-01 | 7.93E-01 | 1.00E+00 | 7.92E-01 |
| 394.01869 | 256.81 | 17.51 | 18.46 | 19.40 | 18.89 | 3.99E-07  | 2.31E-02 | 1.50E-07 | 3.98E-04 | 2.92E-02 | 6.13E-01 | 4.46E-01 |
| 394.03384 | 268.7  | 15.86 | 17.48 | 14.67 | 17.41 | 7.57E-06  | 3.49E-02 | 1.88E-01 | 5.76E-02 | 4.14E-05 | 9.99E-01 | 1.11E-04 |
| 394.04329 | 79.02  | 14.63 | 15.30 | 15.40 | 14.91 | 5.14E-02  | 1.32E-01 | 5.86E-02 | 8.09E-01 | 9.89E-01 | 6.32E-01 | 4.32E-01 |
| 394.04898 | 262.01 | 15.31 | 16.22 | 17.03 | 15.85 | 8.22E-06  | 3.46E-02 | 2.22E-06 | 3.97E-01 | 7.89E-02 | 7.19E-01 | 4.29E-03 |
| 394.11734 | 169.31 | 14.51 | 13.85 | 13.40 | 13.97 | 2.86E-01  | 6.58E-01 | 2.07E-01 | 7.96E-01 | 8.68E-01 | 9.97E-01 | 7.77E-01 |
| 394.24249 | 26.37  | 20.07 | 21.28 | 20.34 | 21.19 | 2.16E-17  | 1.39E-13 | 2.48E-01 | 1.41E-11 | 9.30E-09 | 9.20E-01 | 6.01E-07 |
| 394.28908 | 24.09  | 20.06 | 19.49 | 19.83 | 19.14 | 1.09E-03  | 7.29E-02 | 7.63E-01 | 7.89E-04 | 4.78E-01 | 4.64E-01 | 2.30E-02 |
| 394.29867 | 42.3   | 18.91 | 18.24 | 18.61 | 18.73 | 7.16E-06  | 2.07E-06 | 8.56E-02 | 5.31E-01 | 2.54E-02 | 1.82E-03 | 7.96E-01 |
| 394.52026 | 248.33 | 16.45 | 15.46 | 16.41 | 15.81 | 9.49E-05  | 3.68E-04 | 9.99E-01 | 5.20E-02 | 9.58E-04 | 5.28E-01 | 8.65E-02 |
| 394.64861 | 45.78  | 18.62 | 17.46 | 18.05 | 17.63 | 3.58E-08  | 6.76E-08 | 1.70E-02 | 8.75E-06 | 2.03E-02 | 8.51E-01 | 1.80E-01 |
| 394.72845 | 26.93  | 12.29 | 21.71 | 9.51  | 10.02 | 4.80E-137 | 3.65E-14 | 3.65E-14 | 7.14E-14 | 3.65E-14 | 3.65E-14 | 1.09E-01 |
| 394.7474  | 29.58  | 18.48 | 21.27 | 19.69 | 20.84 | 7.10E-48  | 3.65E-14 | 6.58E-13 | 3.65E-14 | 7.29E-14 | 4.13E-02 | 7.68E-11 |
| 394.75875 | 26.75  | 16.35 | 19.08 | 17.76 | 18.98 | 1.28E-26  | 4.79E-14 | 6.68E-08 | 6.47E-14 | 1.08E-06 | 9.83E-01 | 1.17E-05 |
| 394.77531 | 25.26  | 14.69 | 16.36 | 17.67 | 13.29 | 5.31E-17  | 1.77E-03 | 1.85E-09 | 1.59E-02 | 2.80E-02 | 6.65E-09 | 7.38E-14 |
| 394.78493 | 44.89  | 14.94 | 16.25 | 15.66 | 15.88 | 2.28E-03  | 1.12E-03 | 1.57E-01 | 4.36E-02 | 3.44E-01 | 7.41E-01 | 9.31E-01 |
| 394.79242 | 48.62  | 16.98 | 17.75 | 17.75 | 18.07 | 1.28E-05  | 2.32E-03 | 2.05E-03 | 1.05E-05 | 1.00E+00 | 5.18E-01 | 5.11E-01 |
| 394.8371  | 47.75  | 13.10 | 13.19 | 13.85 | 12.99 | 1.24E-01  | 9.96E-01 | 1.92E-01 | 9.92E-01 | 3.22E-01 | 9.60E-01 | 1.36E-01 |
| 394.874   | 49.16  | 17.89 | 17.08 | 17.53 | 17.62 | 5.41E-06  | 1.09E-06 | 7.24E-02 | 3.17E-01 | 2.13E-02 | 4.09E-03 | 9.24E-01 |
| 394.90874 | 52.37  | 17.39 | 17.82 | 18.19 | 17.51 | 7.26E-06  | 4.38E-02 | 6.73E-06 | 8.88E-01 | 1.09E-01 | 2.80E-01 | 4.68E-04 |
| 394.9229  | 24.77  | 15.69 | 14.85 | 15.28 | 14.96 | 1.26E-01  | 1.22E-01 | 6.91E-01 | 2.39E-01 | 6.89E-01 | 9.93E-01 | 8.54E-01 |
| 394.96429 | 48.65  | 15.32 | 14.73 | 14.72 | 14.16 | 2.43E-02  | 3.58E-01 | 3.33E-01 | 1.09E-02 | 1.00E+00 | 4.53E-01 | 4.63E-01 |
| 395.02532 | 65.56  | 18.28 | 19.53 | 19.64 | 20.16 | 1.14E-04  | 1.47E-02 | 5.34E-03 | 7.86E-05 | 9.92E-01 | 4.63E-01 | 6.28E-01 |
| 395.03655 | 104.08 | 18.24 | 16.16 | 17.33 | 15.60 | 3.71E-11  | 3.25E-07 | 6.31E-02 | 2.02E-10 | 1.23E-02 | 4.70E-01 | 7.39E-05 |
| 395.0953  | 303.31 | 13.90 | 16.73 | 16.49 | 14.59 | 4.21E-25  | 7.14E-14 | 7.45E-14 | 6.54E-02 | 8.17E-01 | 1.06E-11 | 1.11E-09 |

|           |        |       |       |       |       |          |          |          |          |          |          |          |
|-----------|--------|-------|-------|-------|-------|----------|----------|----------|----------|----------|----------|----------|
| 395.11752 | 101.17 | 15.94 | 17.82 | 16.05 | 17.12 | 1.78E-13 | 1.19E-11 | 9.69E-01 | 4.62E-05 | 4.52E-10 | 4.76E-02 | 4.18E-04 |
| 395.13015 | 292.3  | 16.39 | 19.18 | 19.27 | 18.58 | 7.66E-40 | 3.65E-14 | 3.65E-14 | 5.72E-14 | 9.66E-01 | 2.09E-02 | 4.65E-03 |
| 395.15606 | 57.18  | 19.12 | 18.33 | 17.83 | 17.54 | 1.65E-11 | 1.46E-03 | 3.18E-08 | 6.00E-11 | 1.13E-01 | 3.62E-03 | 5.68E-01 |
| 395.22082 | 62.26  | 15.67 | 15.66 | 17.37 | 15.46 | 2.31E-05 | 1.00E+00 | 3.31E-04 | 9.57E-01 | 5.08E-04 | 9.66E-01 | 1.12E-04 |
| 395.23065 | 27.03  | 15.52 | 20.37 | 13.61 | 14.05 | 2.88E-87 | 3.65E-14 | 7.49E-14 | 4.26E-10 | 3.65E-14 | 3.65E-14 | 1.96E-01 |
| 395.25014 | 25.41  | 17.75 | 20.12 | 18.45 | 19.55 | 4.29E-48 | 3.65E-14 | 8.84E-07 | 3.65E-14 | 3.70E-14 | 2.94E-04 | 2.86E-13 |
| 395.26024 | 26.14  | 15.59 | 16.04 | 16.43 | 17.93 | 5.84E-09 | 5.79E-01 | 7.23E-02 | 2.38E-09 | 6.80E-01 | 3.51E-06 | 3.38E-04 |
| 395.27655 | 41.91  | 19.35 | 17.21 | 17.04 | 16.60 | 8.84E-25 | 7.61E-14 | 7.46E-14 | 5.72E-14 | 9.12E-01 | 8.85E-02 | 3.09E-01 |
| 395.29497 | 23.57  | 17.02 | 14.16 | 16.31 | 16.01 | 2.89E-16 | 7.29E-14 | 9.12E-02 | 8.53E-03 | 4.84E-10 | 2.28E-07 | 7.97E-01 |
| 395.52616 | 56.35  | 15.99 | 17.17 | 16.95 | 17.72 | 3.64E-04 | 1.56E-02 | 6.89E-02 | 1.68E-04 | 9.45E-01 | 5.62E-01 | 2.51E-01 |
| 395.63184 | 292.27 | 14.84 | 17.01 | 16.90 | 16.24 | 6.54E-26 | 5.32E-14 | 6.43E-14 | 1.42E-10 | 9.54E-01 | 1.22E-03 | 6.42E-03 |
| 395.7351  | 26.02  | 15.40 | 17.46 | 12.85 | 13.91 | 2.27E-36 | 1.77E-10 | 7.65E-14 | 8.72E-06 | 3.65E-14 | 4.81E-14 | 4.08E-03 |
| 395.75616 | 27.36  | 16.99 | 19.18 | 17.87 | 18.98 | 4.41E-40 | 3.65E-14 | 1.50E-08 | 3.65E-14 | 7.55E-14 | 5.54E-01 | 1.83E-11 |
| 395.76675 | 27.1   | 17.14 | 19.72 | 18.74 | 19.62 | 1.73E-34 | 3.65E-14 | 8.60E-14 | 3.67E-14 | 4.22E-06 | 9.51E-01 | 8.24E-05 |
| 395.77768 | 46.5   | 17.81 | 16.30 | 16.56 | 15.80 | 6.18E-07 | 1.53E-04 | 2.45E-03 | 5.07E-07 | 8.81E-01 | 5.54E-01 | 1.74E-01 |
| 395.86712 | 50.45  | 17.81 | 17.99 | 18.48 | 17.60 | 4.96E-04 | 7.99E-01 | 5.82E-03 | 7.57E-01 | 9.69E-02 | 2.68E-01 | 3.44E-04 |
| 395.88052 | 81.15  | 14.58 | 17.06 | 18.07 | 17.20 | 6.87E-21 | 1.47E-11 | 6.94E-14 | 3.38E-12 | 1.76E-02 | 9.75E-01 | 6.80E-02 |
| 395.987   | 45.46  | 16.21 | 13.89 | 13.92 | 14.03 | 1.40E-09 | 1.15E-07 | 1.37E-07 | 1.38E-06 | 1.00E+00 | 9.87E-01 | 9.94E-01 |
| 396.02248 | 56.93  | 16.35 | 17.70 | 17.56 | 18.40 | 1.14E-05 | 3.49E-03 | 1.10E-02 | 4.30E-06 | 9.82E-01 | 3.42E-01 | 1.74E-01 |
| 396.05102 | 50.33  | 15.70 | 13.51 | 15.38 | 15.04 | 1.76E-09 | 1.85E-09 | 7.70E-01 | 2.19E-01 | 6.02E-07 | 1.17E-04 | 7.63E-01 |
| 396.05486 | 253.36 | 14.01 | 18.04 | 16.54 | 15.95 | 5.27E-33 | 3.65E-14 | 7.36E-14 | 2.66E-10 | 9.40E-07 | 3.09E-11 | 1.64E-01 |
| 396.23913 | 24.77  | 14.30 | 16.07 | 14.18 | 15.84 | 6.94E-06 | 4.83E-04 | 9.93E-01 | 4.42E-03 | 2.54E-04 | 9.61E-01 | 2.42E-03 |
| 396.25812 | 27.14  | 15.86 | 18.33 | 17.00 | 17.98 | 2.46E-16 | 7.86E-14 | 3.63E-04 | 2.47E-11 | 3.78E-05 | 6.41E-01 | 5.72E-03 |
| 396.26864 | 26.63  | 15.57 | 18.43 | 17.49 | 18.25 | 6.37E-40 | 3.65E-14 | 7.08E-14 | 3.65E-14 | 8.36E-06 | 7.92E-01 | 7.17E-04 |
| 396.27985 | 41.27  | 17.03 | 12.98 | 13.44 | 13.66 | 2.19E-74 | 3.65E-14 | 3.65E-14 | 3.65E-14 | 2.32E-02 | 3.08E-04 | 5.28E-01 |
| 396.31049 | 23.23  | 18.55 | 19.11 | 19.26 | 19.06 | 1.57E-02 | 8.17E-02 | 1.23E-02 | 1.47E-01 | 9.17E-01 | 9.97E-01 | 8.41E-01 |
| 396.54366 | 297.21 | 12.37 | 18.03 | 17.39 | 13.49 | 2.35E-50 | 3.65E-14 | 3.65E-14 | 5.39E-03 | 2.32E-01 | 3.65E-14 | 5.03E-14 |
| 396.64641 | 45.85  | 18.43 | 17.58 | 17.71 | 17.37 | 7.43E-13 | 9.02E-09 | 1.05E-06 | 3.36E-12 | 7.82E-01 | 4.55E-01 | 7.89E-02 |
| 396.7348  | 46.27  | 17.58 | 18.66 | 18.80 | 18.34 | 5.97E-24 | 7.29E-14 | 5.72E-14 | 1.37E-09 | 6.09E-01 | 3.44E-02 | 6.02E-04 |
| 396.74449 | 40.13  | 18.00 | 20.19 | 19.31 | 19.60 | 2.36E-14 | 8.62E-14 | 3.30E-06 | 2.96E-08 | 4.82E-03 | 1.30E-01 | 6.98E-01 |
| 396.76172 | 44.93  | 17.11 | 16.19 | 16.51 | 16.42 | 1.88E-05 | 1.09E-05 | 6.97E-03 | 2.44E-03 | 3.64E-01 | 6.48E-01 | 9.76E-01 |
| 396.92302 | 43.87  | 14.99 | 14.37 | 15.16 | 14.31 | 1.31E-01 | 4.55E-01 | 9.76E-01 | 4.07E-01 | 2.59E-01 | 9.99E-01 | 2.28E-01 |
| 396.9513  | 283.91 | 12.50 | 17.66 | 17.51 | 14.98 | 9.53E-26 | 5.98E-14 | 6.47E-14 | 4.23E-06 | 9.90E-01 | 1.10E-06 | 3.79E-06 |
| 396.96061 | 270.17 | 20.04 | 20.05 | 20.53 | 20.56 | 1.42E-01 | 1.00E+00 | 3.21E-01 | 3.14E-01 | 3.64E-01 | 3.54E-01 | 1.00E+00 |
| 396.96978 | 50.99  | 15.39 | 15.44 | 15.71 | 15.90 | 1.24E-01 | 9.97E-01 | 4.97E-01 | 1.43E-01 | 6.56E-01 | 2.40E-01 | 8.68E-01 |
| 397.01298 | 52.18  | 15.59 | 14.44 | 15.15 | 15.15 | 2.42E-02 | 1.09E-02 | 6.24E-01 | 6.57E-01 | 2.39E-01 | 2.62E-01 | 1.00E+00 |
| 397.05153 | 94.63  | 17.78 | 16.56 | 16.89 | 15.67 | 4.39E-06 | 7.85E-03 | 8.83E-02 | 9.73E-07 | 8.21E-01 | 1.27E-01 | 1.30E-02 |
| 397.05949 | 47.09  | 17.69 | 15.77 | 14.90 | 15.28 | 2.49E-13 | 1.45E-06 | 1.26E-12 | 2.54E-09 | 8.55E-02 | 5.60E-01 | 7.51E-01 |
| 397.21901 | 74.99  | 14.84 | 13.47 | 16.68 | 16.46 | 3.45E-09 | 4.09E-02 | 2.25E-03 | 1.29E-02 | 3.14E-08 | 6.57E-07 | 9.79E-01 |
| 397.24757 | 26.48  | 11.94 | 18.94 | 17.39 | 17.38 | 2.45E-40 | 3.65E-14 | 3.67E-14 | 3.83E-14 | 3.58E-03 | 4.75E-03 | 1.00E+00 |
| 397.27128 | 46.23  | 19.25 | 15.40 | 15.84 | 15.18 | 4.83E-44 | 3.65E-14 | 3.65E-14 | 3.65E-14 | 3.34E-01 | 8.32E-01 | 6.28E-02 |
| 397.29481 | 176.39 | 17.80 | 13.38 | 14.10 | 13.97 | 3.06E-36 | 3.65E-14 | 3.87E-14 | 3.87E-14 | 1.05E-01 | 2.78E-01 | 9.76E-01 |
| 397.31387 | 23.09  | 16.11 | 16.20 | 16.54 | 16.49 | 3.51E-01 | 9.88E-01 | 4.15E-01 | 5.39E-01 | 6.45E-01 | 7.55E-01 | 9.99E-01 |
| 397.55337 | 92.04  | 13.42 | 13.38 | 15.57 | 13.96 | 4.22E-03 | 1.00E+00 | 7.05E-03 | 8.59E-01 | 8.11E-03 | 8.41E-01 | 1.01E-01 |
| 397.64606 | 81.38  | 18.01 | 18.27 | 15.61 | 18.78 | 4.23E-11 | 9.30E-01 | 4.68E-07 | 3.13E-01 | 5.71E-08 | 6.90E-01 | 2.73E-10 |
| 397.75393 | 25.69  | 18.07 | 22.64 | 21.11 | 21.77 | 8.74E-73 | 3.65E-14 | 3.65E-14 | 3.65E-14 | 7.76E-14 | 1.66E-05 | 1.38E-03 |
| 397.86556 | 60.2   | 16.83 | 17.00 | 17.39 | 16.42 | 9.04E-04 | 8.70E-01 | 5.57E-02 | 2.99E-01 | 3.19E-01 | 7.56E-02 | 3.15E-04 |
| 397.87971 | 112.12 | 13.61 | 15.70 | 14.22 | 16.25 | 7.41E-10 | 4.76E-06 | 4.49E-01 | 1.24E-08 | 2.87E-03 | 5.89E-01 | 2.58E-05 |
| 397.89661 | 93.44  | 15.76 | 16.04 | 16.98 | 15.90 | 5.81E-08 | 5.21E-01 | 9.02E-08 | 9.20E-01 | 1.21E-04 | 9.07E-01 | 9.83E-06 |
| 397.91521 | 69.2   | 15.22 | 18.48 | 18.34 | 18.15 | 6.79E-31 | 3.83E-14 | 4.19E-14 | 6.81E-14 | 9.58E-01 | 6.62E-01 | 9.11E-01 |
| 397.9528  | 39.84  | 16.64 | 13.77 | 15.27 | 14.51 | 1.36E-08 | 6.99E-09 | 1.34E-02 | 4.19E-05 | 7.22E-03 | 4.13E-01 | 3.73E-01 |
| 398.0035  | 63.84  | 15.68 | 13.71 | 17.66 | 16.05 | 7.11E-13 | 1.80E-04 | 1.35E-04 | 8.61E-01 | 1.26E-13 | 1.89E-05 | 5.91E-03 |
| 398.02115 | 68.87  | 18.40 | 17.58 | 17.47 | 17.47 | 4.39E-02 | 1.44E-01 | 7.23E-02 | 8.65E-02 | 9.93E-01 | 9.93E-01 | 1.00E+00 |
| 398.03307 | 54.11  | 23.09 | 24.49 | 24.35 | 24.08 | 5.92E-28 | 3.87E-14 | 6.05E-14 | 1.70E-13 | 6.40E-01 | 4.84E-03 | 1.13E-01 |
| 398.13843 | 64.84  | 16.14 | 20.34 | 16.41 | 16.72 | 3.32E-59 | 3.65E-14 | 5.09E-01 | 2.30E-02 | 3.65E-14 | 3.65E-14 | 4.39E-01 |
| 398.24048 | 31.37  | 18.73 | 17.36 | 17.68 | 17.46 | 2.43E-05 | 6.62E-05 | 3.22E-03 | 4.06E-04 | 7.43E-01 | 9.89E-01 | 9.10E-01 |
| 398.25566 | 25.89  | 17.40 | 21.54 | 19.96 | 20.65 | 2.51E-46 | 3.65E-14 | 4.74E-14 | 3.65E-14 | 6.00E-10 | 1.61E-03 | 2.07E-02 |
| 398.32633 | 23.09  | 21.88 | 22.58 | 22.20 | 21.77 | 8.64E-03 | 2.50E-02 | 5.48E-01 | 9.70E-01 | 4.43E-01 | 1.09E-02 | 3.31E-01 |
| 398.64398 | 54.58  | 17.52 | 17.15 | 16.29 | 16.99 | 3.68E-07 | 2.74E-01 | 7.45E-08 | 6.41E-02 | 5.81E-04 | 8.93E-01 | 1.01E-02 |
| 398.73583 | 46.41  | 19.45 | 20.45 | 20.41 | 20.10 | 1.17E-10 | 2.61E-09 | 6.81E-09 | 2.72E-04 | 9.96E-01 | 1.42E-01 | 2.14E-01 |
| 398.76171 | 29.46  | 20.82 | 24.92 | 23.48 | 24.48 | 5.05E-82 | 3.65E-14 | 3.65E-14 | 3.65E-14 | 7.47E-14 | 1.69E-02 | 4.07E-10 |
| 398.89735 | 24.48  | 16.29 | 11.37 | 11.93 | 12.35 | 2.06E-81 | 3.65E-14 | 3.65E-14 | 3.65E-14 | 9.20E-03 | 1.10E-06 | 9.35E-02 |
| 398.91458 | 86.26  | 14.42 | 14.91 | 14.26 | 14.73 | 3.93E-01 | 6.13E-01 | 9.76E-01 | 8.83E-01 | 3.85E-01 | 9.71E-01 | 6.86E-01 |
| 398.99412 | 87.16  | 16.16 | 22.11 | 22.09 | 20.65 | 2.35E-34 | 3.65E-14 | 3.65E-14 | 7.27E-14 | 1.00E+00 | 1.37E-02 | 1.47E-02 |
| 399.01633 | 63.15  | 16.41 | 16.17 | 17.46 | 16.41 | 1.18E-07 | 7.09E-01 | 1.80E-05 | 1.00E+00 | 2.55E-07 | 7.38E-01 | 6.20E-05 |
| 399.03063 | 54.12  | 15.31 | 14.50 | 13.90 | 14.28 | 5.40E-04 | 8.78E-02 | 2.50E-04 | 1.85E-02 | 3.10E-01 | 9.23E-01 | 7.16E-01 |
| 399.0372  | 54.61  | 18.93 | 20.21 | 20.19 | 19.74 | 6.80E-25 | 6.45E-14 | 6.65E-14 | 1.45E-09 | 9.97E-01 | 1.32E-03 | 2.41E-03 |
| 399.07567 | 56.08  | 17.82 | 18.14 | 18.56 | 16.84 | 7.30E-08 | 6.36E-01 | 2.73E-02 | 2.51E-03 | 4.03E-01 | 4.67E-05 | 2.31E-08 |

|           |        |       |       |       |       |           |          |          |          |          |          |          |
|-----------|--------|-------|-------|-------|-------|-----------|----------|----------|----------|----------|----------|----------|
| 399.12914 | 89.16  | 18.55 | 19.47 | 19.56 | 18.66 | 6.27E-11  | 6.48E-07 | 3.30E-08 | 9.32E-01 | 9.57E-01 | 4.09E-05 | 3.59E-06 |
| 399.14463 | 94.05  | 22.55 | 24.60 | 24.57 | 24.16 | 4.38E-26  | 5.92E-14 | 6.21E-14 | 1.08E-13 | 9.97E-01 | 1.18E-01 | 1.71E-01 |
| 399.2507  | 202.16 | 16.79 | 12.04 | 14.95 | 13.85 | 7.66E-21  | 6.16E-14 | 1.78E-04 | 2.00E-09 | 2.73E-09 | 6.89E-04 | 7.68E-02 |
| 399.26346 | 29.59  | 19.61 | 23.86 | 22.36 | 23.32 | 4.76E-76  | 3.65E-14 | 3.65E-14 | 3.65E-14 | 7.45E-14 | 6.26E-03 | 8.25E-08 |
| 399.32546 | 287.31 | 18.46 | 11.37 | 12.44 | 12.64 | 9.38E-32  | 3.65E-14 | 5.32E-14 | 7.07E-14 | 2.20E-01 | 1.23E-01 | 9.85E-01 |
| 399.32593 | 163.13 | 18.31 | 11.98 | 12.69 | 13.50 | 7.32E-42  | 3.65E-14 | 3.65E-14 | 4.10E-14 | 2.95E-01 | 1.97E-03 | 2.12E-01 |
| 399.32903 | 23.31  | 19.67 | 20.40 | 19.98 | 19.65 | 8.63E-03  | 1.34E-02 | 5.74E-01 | 1.00E+00 | 3.05E-01 | 1.62E-02 | 5.51E-01 |
| 399.34702 | 209.41 | 16.67 | 7.98  | 9.85  | 11.27 | 1.78E-42  | 3.65E-14 | 3.65E-14 | 7.06E-14 | 2.35E-03 | 2.95E-08 | 4.28E-02 |
| 399.68617 | 27.04  | 15.88 | 19.72 | 14.20 | 14.34 | 2.58E-128 | 3.65E-14 | 3.65E-14 | 3.65E-14 | 3.65E-14 | 3.65E-14 | 6.09E-01 |
| 399.77013 | 28.86  | 19.37 | 23.07 | 21.69 | 22.77 | 1.36E-86  | 3.65E-14 | 3.65E-14 | 3.65E-14 | 4.96E-14 | 7.86E-02 | 8.25E-14 |
| 399.77909 | 304.93 | 15.49 | 17.82 | 17.39 | 16.68 | 1.38E-29  | 3.65E-14 | 6.69E-14 | 4.38E-09 | 8.59E-02 | 4.22E-08 | 1.23E-03 |
| 399.89156 | 46.34  | 15.32 | 16.10 | 16.31 | 16.25 | 3.69E-06  | 1.07E-03 | 1.39E-05 | 9.16E-05 | 7.62E-01 | 8.99E-01 | 9.94E-01 |
| 399.91376 | 36.69  | 17.99 | 18.50 | 18.54 | 18.61 | 4.80E-05  | 2.10E-03 | 6.96E-04 | 1.78E-04 | 9.94E-01 | 8.92E-01 | 9.66E-01 |
| 399.94704 | 47.88  | 16.86 | 14.40 | 15.94 | 13.18 | 5.77E-10  | 4.50E-05 | 3.11E-01 | 1.17E-09 | 2.80E-02 | 1.43E-01 | 1.12E-05 |
| 399.96803 | 50.44  | 15.30 | 15.98 | 18.27 | 16.52 | 9.19E-17  | 1.42E-01 | 7.47E-14 | 1.32E-03 | 1.53E-10 | 3.81E-01 | 2.19E-06 |
| 399.97047 | 128.96 | 9.15  | 13.14 | 10.59 | 12.99 | 9.16E-12  | 7.37E-10 | 6.80E-02 | 7.68E-09 | 2.15E-04 | 9.95E-01 | 8.23E-04 |
| 399.99448 | 83.67  | 15.81 | 19.38 | 19.20 | 18.45 | 5.34E-41  | 3.65E-14 | 3.65E-14 | 5.67E-14 | 8.68E-01 | 1.19E-03 | 1.35E-02 |
| 400.02905 | 53.07  | 20.15 | 21.48 | 21.42 | 20.98 | 4.07E-26  | 5.14E-14 | 6.36E-14 | 3.88E-10 | 9.61E-01 | 5.55E-04 | 2.85E-03 |
| 400.03711 | 53.44  | 17.03 | 18.02 | 17.95 | 17.67 | 3.11E-17  | 7.75E-14 | 1.73E-13 | 5.35E-07 | 9.20E-01 | 1.82E-02 | 8.86E-02 |
| 400.05088 | 179.68 | 13.57 | 13.64 | 14.62 | 14.84 | 2.19E-02  | 9.99E-01 | 1.37E-01 | 5.95E-02 | 2.15E-01 | 1.02E-01 | 9.74E-01 |
| 400.11322 | 305.02 | 14.53 | 16.23 | 15.81 | 15.37 | 7.80E-23  | 5.32E-14 | 9.38E-14 | 9.89E-07 | 3.35E-02 | 1.24E-06 | 3.39E-02 |
| 400.13328 | 82.41  | 14.23 | 15.23 | 14.80 | 12.69 | 5.32E-05  | 2.20E-01 | 6.85E-01 | 2.16E-02 | 8.51E-01 | 3.77E-05 | 8.04E-04 |
| 400.27052 | 26.6   | 18.58 | 21.99 | 20.66 | 21.69 | 3.46E-79  | 3.65E-14 | 3.65E-14 | 3.65E-14 | 6.41E-14 | 8.94E-02 | 2.45E-13 |
| 400.34193 | 24.93  | 24.97 | 25.22 | 24.99 | 24.35 | 7.29E-03  | 7.40E-01 | 1.00E+00 | 5.79E-02 | 7.88E-01 | 4.21E-03 | 5.75E-02 |
| 400.43583 | 307.54 | 13.66 | 13.73 | 14.02 | 13.68 | 1.64E-01  | 9.82E-01 | 1.69E-01 | 1.00E+00 | 3.64E-01 | 9.95E-01 | 2.58E-01 |
| 400.44766 | 308.27 | 12.95 | 13.84 | 13.55 | 13.33 | 4.32E-04  | 1.93E-04 | 2.17E-02 | 3.06E-01 | 5.38E-01 | 9.73E-02 | 7.33E-01 |
| 400.71023 | 27.29  | 17.52 | 19.57 | 17.29 | 17.10 | 1.45E-92  | 3.65E-14 | 6.88E-03 | 2.68E-07 | 3.65E-14 | 3.65E-14 | 6.94E-02 |
| 400.7299  | 44.38  | 16.92 | 18.16 | 17.94 | 17.68 | 1.91E-19  | 7.42E-14 | 1.65E-13 | 7.55E-08 | 3.34E-01 | 2.09E-03 | 1.90E-01 |
| 400.73821 | 49.62  | 16.95 | 18.72 | 18.88 | 18.49 | 4.23E-08  | 3.40E-06 | 2.52E-07 | 1.12E-04 | 9.67E-01 | 9.23E-01 | 6.98E-01 |
| 400.75789 | 33.96  | 15.81 | 18.90 | 17.71 | 18.49 | 2.61E-39  | 3.65E-14 | 7.38E-14 | 3.65E-14 | 7.90E-08 | 1.97E-01 | 1.24E-03 |
| 400.77562 | 41.52  | 16.29 | 19.86 | 18.48 | 19.26 | 5.02E-33  | 3.65E-14 | 8.07E-14 | 4.85E-14 | 1.80E-06 | 1.28E-01 | 1.88E-02 |
| 400.81758 | 45.21  | 19.10 | 18.82 | 19.06 | 18.55 | 4.48E-05  | 8.71E-02 | 9.78E-01 | 6.93E-05 | 2.22E-01 | 1.52E-01 | 4.89E-04 |
| 400.82721 | 48.75  | 16.65 | 19.00 | 19.03 | 19.05 | 1.69E-20  | 7.74E-14 | 7.43E-14 | 7.75E-14 | 9.99E-01 | 9.99E-01 | 1.00E+00 |
| 400.88195 | 89.64  | 13.70 | 16.20 | 17.55 | 16.37 | 3.81E-13  | 2.05E-06 | 2.00E-13 | 6.76E-07 | 2.91E-02 | 9.85E-01 | 8.65E-02 |
| 400.90906 | 42.26  | 16.48 | 15.53 | 14.91 | 14.78 | 5.39E-05  | 7.16E-02 | 3.24E-04 | 1.62E-04 | 3.89E-01 | 2.58E-01 | 9.90E-01 |
| 400.91848 | 48.58  | 16.53 | 16.54 | 16.38 | 16.78 | 3.77E-01  | 1.00E+00 | 8.86E-01 | 6.80E-01 | 8.86E-01 | 7.16E-01 | 2.88E-01 |
| 400.9422  | 49.05  | 21.55 | 21.90 | 22.09 | 20.83 | 2.26E-07  | 3.41E-01 | 4.68E-02 | 5.55E-03 | 8.07E-01 | 1.67E-05 | 2.03E-07 |
| 400.99146 | 86.52  | 15.98 | 18.93 | 18.86 | 18.24 | 1.33E-38  | 3.65E-14 | 3.65E-14 | 6.61E-14 | 9.88E-01 | 8.53E-03 | 2.05E-02 |
| 400.99849 | 85.88  | 15.44 | 15.43 | 14.91 | 15.71 | 2.57E-03  | 1.00E+00 | 4.47E-02 | 5.67E-01 | 6.09E-02 | 5.72E-01 | 1.29E-03 |
| 401.03242 | 53.56  | 16.02 | 16.54 | 16.18 | 16.10 | 4.42E-02  | 3.18E-02 | 8.09E-01 | 9.69E-01 | 2.62E-01 | 1.36E-01 | 9.78E-01 |
| 401.1405  | 99.98  | 17.95 | 19.83 | 19.93 | 19.26 | 2.44E-37  | 3.65E-14 | 3.65E-14 | 7.46E-14 | 9.02E-01 | 6.18E-04 | 3.42E-05 |
| 401.15008 | 93.41  | 15.71 | 17.83 | 17.64 | 17.19 | 9.46E-19  | 7.41E-14 | 8.85E-14 | 7.75E-09 | 8.48E-01 | 4.41E-02 | 2.46E-01 |
| 401.21633 | 66.86  | 15.04 | 17.70 | 16.89 | 16.20 | 4.77E-09  | 1.88E-09 | 3.86E-05 | 2.84E-02 | 2.03E-01 | 2.99E-03 | 3.68E-01 |
| 401.25637 | 27.06  | 15.89 | 17.55 | 17.28 | 17.18 | 1.97E-11  | 1.22E-10 | 5.91E-08 | 1.24E-06 | 6.67E-01 | 4.52E-01 | 9.81E-01 |
| 401.34496 | 25.24  | 22.80 | 23.23 | 23.00 | 22.22 | 2.20E-03  | 3.31E-01 | 8.63E-01 | 1.14E-01 | 8.07E-01 | 1.18E-03 | 1.93E-02 |
| 401.71718 | 27.11  | 13.50 | 19.65 | 10.93 | 10.93 | 1.43E-106 | 3.65E-14 | 4.14E-14 | 4.83E-14 | 3.65E-14 | 3.65E-14 | 1.00E+00 |
| 401.72652 | 24.58  | 18.01 | 12.81 | 13.18 | 13.94 | 4.32E-73  | 3.65E-14 | 3.65E-14 | 3.65E-14 | 2.91E-01 | 2.51E-06 | 2.78E-03 |
| 401.73822 | 23.54  | 17.51 | 21.34 | 19.80 | 20.97 | 1.14E-76  | 3.65E-14 | 3.65E-14 | 3.65E-14 | 6.49E-14 | 5.77E-02 | 5.15E-13 |
| 401.765   | 24.69  | 15.66 | 16.93 | 18.10 | 17.56 | 3.16E-14  | 1.31E-04 | 1.05E-13 | 7.86E-09 | 6.85E-04 | 1.74E-01 | 2.98E-01 |
| 401.81196 | 49.51  | 16.82 | 16.19 | 16.32 | 14.96 | 1.18E-05  | 2.84E-01 | 4.74E-01 | 3.21E-06 | 9.86E-01 | 5.74E-03 | 1.62E-03 |
| 401.82015 | 50     | 16.16 | 18.39 | 18.50 | 17.84 | 5.34E-36  | 3.65E-14 | 3.65E-14 | 7.61E-14 | 9.10E-01 | 1.15E-02 | 1.15E-03 |
| 401.88927 | 45.08  | 14.77 | 14.88 | 15.19 | 14.93 | 5.05E-01  | 9.79E-01 | 4.35E-01 | 9.43E-01 | 7.06E-01 | 9.98E-01 | 8.18E-01 |
| 401.90212 | 24.96  | 13.41 | 14.85 | 13.89 | 14.86 | 9.74E-13  | 4.23E-10 | 9.59E-02 | 7.92E-10 | 8.16E-05 | 1.00E+00 | 9.82E-05 |
| 401.91088 | 47.03  | 14.43 | 14.39 | 13.64 | 14.25 | 1.32E-01  | 1.00E+00 | 1.40E-01 | 9.68E-01 | 1.92E-01 | 9.84E-01 | 3.89E-01 |
| 401.91794 | 48.32  | 15.52 | 15.56 | 15.62 | 15.65 | 9.67E-01  | 9.99E-01 | 9.83E-01 | 9.66E-01 | 9.96E-01 | 9.89E-01 | 1.00E+00 |
| 401.94679 | 51.65  | 17.37 | 17.25 | 17.31 | 16.42 | 2.79E-04  | 9.53E-01 | 9.94E-01 | 4.39E-04 | 9.93E-01 | 4.24E-03 | 1.53E-03 |
| 401.99525 | 70.18  | 16.42 | 20.30 | 20.11 | 19.50 | 1.48E-43  | 3.65E-14 | 3.65E-14 | 3.72E-14 | 8.73E-01 | 1.11E-02 | 7.96E-02 |
| 402.01211 | 272.77 | 17.80 | 19.08 | 19.01 | 17.65 | 2.12E-05  | 2.14E-03 | 3.88E-03 | 9.74E-01 | 9.97E-01 | 9.78E-04 | 1.77E-03 |
| 402.01315 | 52.47  | 13.42 | 9.62  | 9.21  | 12.14 | 1.14E-11  | 2.85E-08 | 5.52E-10 | 1.94E-01 | 9.22E-01 | 9.61E-04 | 7.15E-05 |
| 402.02116 | 251.38 | 14.04 | 17.10 | 15.32 | 14.71 | 8.25E-14  | 1.05E-13 | 2.43E-03 | 2.75E-01 | 1.98E-05 | 1.56E-08 | 3.76E-01 |
| 402.14375 | 88.11  | 15.03 | 16.17 | 15.71 | 15.73 | 2.25E-04  | 6.86E-05 | 3.71E-02 | 4.01E-02 | 2.92E-01 | 3.55E-01 | 1.00E+00 |
| 402.2253  | 33.7   | 15.74 | 17.11 | 10.24 | 11.23 | 2.91E-36  | 3.33E-02 | 5.36E-14 | 7.51E-14 | 3.65E-14 | 5.41E-14 | 2.27E-01 |
| 402.23967 | 24.84  | 16.89 | 20.13 | 18.60 | 19.75 | 6.14E-60  | 3.65E-14 | 4.30E-14 | 3.65E-14 | 7.43E-14 | 8.54E-02 | 1.51E-11 |
| 402.26735 | 23.52  | 14.09 | 12.95 | 16.75 | 14.14 | 5.72E-14  | 4.90E-02 | 2.60E-08 | 9.99E-01 | 1.01E-13 | 5.19E-02 | 3.01E-07 |
| 402.32076 | 22.88  | 15.83 | 13.98 | 12.35 | 13.60 | 9.52E-16  | 1.17E-05 | 7.47E-14 | 1.80E-07 | 2.22E-04 | 7.75E-01 | 1.04E-02 |
| 402.34479 | 285.31 | 18.70 | 11.99 | 12.46 | 13.34 | 1.87E-28  | 4.05E-14 | 5.52E-14 | 7.36E-14 | 8.49E-01 | 1.13E-01 | 4.54E-01 |
| 402.34481 | 155.67 | 18.18 | 11.68 | 12.43 | 13.33 | 1.07E-34  | 3.65E-14 | 3.72E-14 | 7.23E-14 | 3.98E-01 | 5.40E-03 | 2.59E-01 |
| 402.34775 | 23.19  | 19.79 | 19.99 | 19.86 | 19.22 | 5.58E-03  | 7.93E-01 | 9.90E-01 | 4.77E-02 | 9.32E-01 | 4.45E-03 | 2.52E-02 |

|           |        |       |       |       |       |          |          |          |          |          |          |          |
|-----------|--------|-------|-------|-------|-------|----------|----------|----------|----------|----------|----------|----------|
| 402.68439 | 48.96  | 18.73 | 19.15 | 19.19 | 19.05 | 1.84E-02 | 4.66E-02 | 2.06E-02 | 2.30E-01 | 9.94E-01 | 9.24E-01 | 8.13E-01 |
| 402.73234 | 43.16  | 17.70 | 20.89 | 17.17 | 17.33 | 2.36E-43 | 3.65E-14 | 9.41E-02 | 3.84E-01 | 3.65E-14 | 3.65E-14 | 9.19E-01 |
| 402.746   | 30.7   | 17.41 | 20.59 | 19.00 | 19.92 | 8.66E-64 | 3.65E-14 | 3.85E-14 | 3.65E-14 | 4.19E-14 | 1.83E-05 | 1.68E-09 |
| 402.76405 | 25.25  | 17.26 | 21.37 | 19.51 | 20.56 | 5.61E-59 | 3.65E-14 | 3.74E-14 | 3.65E-14 | 7.46E-14 | 2.54E-04 | 1.00E-06 |
| 402.77375 | 44.93  | 17.25 | 19.44 | 20.26 | 19.24 | 1.41E-44 | 3.65E-14 | 3.65E-14 | 4.63E-14 | 2.12E-05 | 6.65E-01 | 1.45E-07 |
| 402.81537 | 44.76  | 18.96 | 18.49 | 18.97 | 18.25 | 5.79E-11 | 1.87E-04 | 9.99E-01 | 1.39E-08 | 1.59E-04 | 1.80E-01 | 1.42E-08 |
| 402.82429 | 48.9   | 17.01 | 19.02 | 18.99 | 19.16 | 2.44E-20 | 8.03E-14 | 8.18E-14 | 7.38E-14 | 9.99E-01 | 9.34E-01 | 8.92E-01 |
| 402.86697 | 43.14  | 14.75 | 13.44 | 14.86 | 13.77 | 2.23E-04 | 2.82E-03 | 9.91E-01 | 5.24E-02 | 1.37E-03 | 8.34E-01 | 2.90E-02 |
| 402.88551 | 42.94  | 14.69 | 16.26 | 14.78 | 15.81 | 7.65E-13 | 1.38E-10 | 9.78E-01 | 1.15E-05 | 3.26E-09 | 2.25E-01 | 9.70E-05 |
| 402.91606 | 46.54  | 16.52 | 16.73 | 16.58 | 16.84 | 4.97E-01 | 7.79E-01 | 9.92E-01 | 4.86E-01 | 9.16E-01 | 9.62E-01 | 6.77E-01 |
| 402.94055 | 53.58  | 18.60 | 18.59 | 18.84 | 17.73 | 1.96E-05 | 1.00E+00 | 7.07E-01 | 6.65E-04 | 6.78E-01 | 1.41E-03 | 1.39E-05 |
| 402.96102 | 67.3   | 17.19 | 19.66 | 19.59 | 19.26 | 2.27E-35 | 3.65E-14 | 3.65E-14 | 5.92E-14 | 9.83E-01 | 1.71E-01 | 3.18E-01 |
| 402.99325 | 91.53  | 15.74 | 19.89 | 20.08 | 18.56 | 3.04E-49 | 3.65E-14 | 3.65E-14 | 5.14E-14 | 8.73E-01 | 3.90E-06 | 7.89E-08 |
| 403.01071 | 54.78  | 17.83 | 16.24 | 15.63 | 17.96 | 8.94E-07 | 5.25E-03 | 3.14E-05 | 9.94E-01 | 6.00E-01 | 4.16E-03 | 3.23E-05 |
| 403.06726 | 50.18  | 16.84 | 16.60 | 16.19 | 16.00 | 8.29E-04 | 6.93E-01 | 1.58E-02 | 1.20E-03 | 2.61E-01 | 4.62E-02 | 8.28E-01 |
| 403.23033 | 38.7   | 14.54 | 19.34 | 12.48 | 12.40 | 1.76E-40 | 6.07E-14 | 2.20E-05 | 2.06E-05 | 3.65E-14 | 3.65E-14 | 9.98E-01 |
| 403.24749 | 31.23  | 16.78 | 19.24 | 17.27 | 18.71 | 7.07E-41 | 3.65E-14 | 1.04E-02 | 4.12E-14 | 3.90E-14 | 1.09E-02 | 8.49E-14 |
| 403.2654  | 25.61  | 16.52 | 20.19 | 18.28 | 19.49 | 6.17E-65 | 3.65E-14 | 4.19E-14 | 3.65E-14 | 3.74E-14 | 1.25E-04 | 6.33E-12 |
| 403.27438 | 37.16  | 16.42 | 18.15 | 19.31 | 17.98 | 1.05E-37 | 7.58E-14 | 3.65E-14 | 8.79E-14 | 5.88E-09 | 7.91E-01 | 6.90E-01 |
| 403.28361 | 24.07  | 19.22 | 18.11 | 18.78 | 18.99 | 6.98E-03 | 3.79E-03 | 5.10E-01 | 8.93E-01 | 1.83E-01 | 5.30E-02 | 9.27E-01 |
| 403.35137 | 22.64  | 16.05 | 14.81 | 14.92 | 14.22 | 1.83E-08 | 9.84E-05 | 4.02E-04 | 7.81E-09 | 9.82E-01 | 1.97E-01 | 8.63E-02 |
| 403.35546 | 182.43 | 17.39 | 13.48 | 13.62 | 14.37 | 4.17E-24 | 6.81E-14 | 7.41E-14 | 7.69E-13 | 9.83E-01 | 1.08E-01 | 2.17E-01 |
| 403.73403 | 26.51  | 15.16 | 18.28 | 12.04 | 12.41 | 1.02E-97 | 3.65E-14 | 3.65E-14 | 3.65E-14 | 3.65E-14 | 3.65E-14 | 1.62E-01 |
| 403.75401 | 24.61  | 17.02 | 19.95 | 18.46 | 19.64 | 3.52E-58 | 3.65E-14 | 7.03E-14 | 3.65E-14 | 6.98E-14 | 1.38E-01 | 3.36E-13 |
| 403.77225 | 32.24  | 17.04 | 20.67 | 19.04 | 19.67 | 8.09E-52 | 3.65E-14 | 4.79E-14 | 3.65E-14 | 7.49E-14 | 1.78E-06 | 4.54E-03 |
| 403.78088 | 22.74  | 14.76 | 12.65 | 17.08 | 14.47 | 2.67E-22 | 3.11E-07 | 1.01E-08 | 8.79E-01 | 4.45E-14 | 4.14E-05 | 1.27E-09 |
| 403.80943 | 49.01  | 16.86 | 15.57 | 15.53 | 14.89 | 8.37E-07 | 1.28E-03 | 7.18E-04 | 4.27E-07 | 9.99E-01 | 2.47E-01 | 2.93E-01 |
| 403.81719 | 49.86  | 16.17 | 18.82 | 18.94 | 18.33 | 3.27E-45 | 3.65E-14 | 3.65E-14 | 3.72E-14 | 9.08E-01 | 3.17E-02 | 3.90E-03 |
| 403.96809 | 121.1  | 11.63 | 14.73 | 13.70 | 13.46 | 5.84E-08 | 1.54E-08 | 2.52E-04 | 2.45E-03 | 1.80E-01 | 7.89E-02 | 9.70E-01 |
| 403.99228 | 75.99  | 14.75 | 17.75 | 17.28 | 16.71 | 4.21E-23 | 6.16E-14 | 7.32E-14 | 2.36E-10 | 3.55E-01 | 2.53E-03 | 1.96E-01 |
| 404.02408 | 261.15 | 15.49 | 15.88 | 15.22 | 14.82 | 2.85E-04 | 3.34E-01 | 6.40E-01 | 2.50E-02 | 2.94E-02 | 1.23E-04 | 3.44E-01 |
| 404.08861 | 55.59  | 14.96 | 16.40 | 15.98 | 16.38 | 7.50E-10 | 1.38E-08 | 7.41E-05 | 5.32E-08 | 2.94E-01 | 1.00E+00 | 3.64E-01 |
| 404.09464 | 252.84 | 15.48 | 17.01 | 17.00 | 16.46 | 3.76E-13 | 3.64E-11 | 3.45E-11 | 6.11E-05 | 1.00E+00 | 6.37E-02 | 6.95E-02 |
| 404.14466 | 49.35  | 16.69 | 16.01 | 15.72 | 15.57 | 1.66E-03 | 1.15E-01 | 7.43E-03 | 2.24E-03 | 7.81E-01 | 5.22E-01 | 9.68E-01 |
| 404.21513 | 76.11  | 15.54 | 17.87 | 17.43 | 16.90 | 9.05E-18 | 7.52E-14 | 2.44E-12 | 1.16E-06 | 3.08E-01 | 1.58E-03 | 1.80E-01 |
| 404.22793 | 28.62  | 13.98 | 18.05 | 17.94 | 17.22 | 3.29E-27 | 5.05E-14 | 5.63E-14 | 7.59E-14 | 9.90E-01 | 1.31E-01 | 2.28E-01 |
| 404.23682 | 43.01  | 14.88 | 16.13 | 12.58 | 12.99 | 7.98E-17 | 1.11E-02 | 1.57E-07 | 4.77E-05 | 8.09E-14 | 1.99E-11 | 7.62E-01 |
| 404.25554 | 33.26  | 16.42 | 18.74 | 16.90 | 18.47 | 9.87E-37 | 3.65E-14 | 2.63E-02 | 4.19E-14 | 7.01E-14 | 4.37E-01 | 7.61E-14 |
| 404.27383 | 26     | 16.07 | 19.45 | 17.83 | 18.43 | 2.65E-37 | 3.65E-14 | 1.05E-13 | 6.25E-14 | 1.26E-11 | 5.34E-05 | 3.89E-02 |
| 404.28653 | 23.96  | 17.71 | 13.47 | 16.56 | 16.35 | 5.49E-27 | 3.67E-14 | 3.17E-03 | 5.18E-04 | 7.52E-14 | 1.74E-13 | 9.32E-01 |
| 404.68111 | 47.3   | 19.64 | 20.10 | 20.12 | 19.69 | 1.04E-02 | 5.63E-02 | 4.01E-02 | 9.94E-01 | 1.00E+00 | 1.39E-01 | 1.07E-01 |
| 404.7564  | 23.68  | 12.95 | 16.03 | 18.01 | 16.14 | 7.96E-33 | 7.58E-14 | 3.65E-14 | 7.41E-14 | 3.77E-07 | 9.91E-01 | 3.17E-06 |
| 404.78715 | 33.75  | 15.35 | 16.02 | 17.30 | 15.67 | 3.46E-09 | 1.21E-01 | 2.39E-09 | 7.26E-01 | 2.59E-04 | 6.96E-01 | 3.24E-06 |
| 404.81253 | 44.78  | 17.24 | 16.31 | 17.07 | 16.21 | 4.13E-11 | 2.14E-07 | 7.14E-01 | 1.91E-08 | 5.19E-05 | 9.36E-01 | 5.98E-06 |
| 404.82126 | 48.83  | 14.03 | 17.18 | 17.02 | 17.02 | 4.22E-18 | 9.05E-14 | 2.25E-13 | 9.32E-13 | 9.73E-01 | 9.77E-01 | 1.00E+00 |
| 404.87039 | 24.15  | 13.33 | 11.99 | 13.67 | 13.12 | 1.11E-04 | 1.81E-03 | 7.86E-01 | 9.42E-01 | 7.22E-05 | 2.09E-02 | 4.79E-01 |
| 404.90445 | 137.57 | 12.77 | 15.56 | 18.03 | 16.58 | 1.38E-17 | 4.00E-06 | 7.26E-14 | 5.56E-10 | 9.83E-05 | 2.93E-01 | 6.06E-02 |
| 404.95253 | 44.55  | 16.37 | 17.25 | 17.46 | 17.72 | 1.90E-12 | 5.13E-06 | 8.61E-09 | 8.53E-12 | 6.49E-01 | 6.26E-02 | 5.11E-01 |
| 404.98911 | 85.63  | 15.40 | 16.42 | 16.17 | 14.85 | 1.59E-05 | 9.11E-03 | 7.75E-02 | 3.54E-01 | 8.68E-01 | 4.20E-05 | 7.65E-04 |
| 405.00986 | 291.03 | 18.09 | 12.87 | 13.21 | 14.66 | 4.20E-13 | 1.19E-11 | 1.47E-10 | 1.94E-05 | 9.64E-01 | 7.70E-02 | 2.02E-01 |
| 405.0939  | 80.71  | 17.90 | 20.59 | 19.91 | 20.15 | 2.58E-17 | 7.45E-14 | 4.66E-10 | 1.70E-11 | 1.09E-01 | 4.91E-01 | 8.63E-01 |
| 405.10581 | 71.13  | 17.94 | 18.97 | 18.90 | 18.03 | 8.32E-09 | 2.13E-06 | 8.11E-06 | 9.64E-01 | 9.88E-01 | 6.65E-05 | 2.11E-04 |
| 405.16128 | 113.63 | 15.29 | 17.48 | 17.87 | 18.03 | 9.73E-18 | 1.47E-10 | 1.14E-13 | 8.53E-14 | 6.06E-01 | 3.43E-01 | 9.64E-01 |
| 405.21186 | 76.96  | 16.64 | 19.46 | 18.95 | 17.79 | 1.41E-25 | 4.43E-14 | 7.45E-14 | 4.26E-05 | 1.77E-01 | 3.23E-09 | 4.92E-05 |
| 405.23563 | 28.21  | 15.70 | 20.11 | 20.08 | 18.98 | 2.36E-26 | 5.81E-14 | 5.74E-14 | 4.56E-13 | 1.00E+00 | 4.07E-02 | 4.59E-02 |
| 405.256   | 22.7   | 9.45  | 9.84  | 16.80 | 12.06 | 2.59E-32 | 8.90E-01 | 3.65E-14 | 4.02E-05 | 3.74E-14 | 1.11E-03 | 2.01E-13 |
| 405.29768 | 23.7   | 18.47 | 16.15 | 17.48 | 17.07 | 4.43E-09 | 6.97E-10 | 2.11E-02 | 5.71E-04 | 1.07E-03 | 5.55E-02 | 6.66E-01 |
| 405.56407 | 304.57 | 15.29 | 16.88 | 15.81 | 15.20 | 2.90E-13 | 1.83E-11 | 7.07E-02 | 9.72E-01 | 1.43E-05 | 1.68E-11 | 3.33E-02 |
| 405.63519 | 79.04  | 20.71 | 19.57 | 17.85 | 19.01 | 2.62E-12 | 9.53E-03 | 4.24E-13 | 3.78E-05 | 3.01E-05 | 4.43E-01 | 1.34E-02 |
| 405.73873 | 26.69  | 17.73 | 19.37 | 18.86 | 19.23 | 2.33E-19 | 7.57E-14 | 1.35E-09 | 9.21E-14 | 2.29E-02 | 8.76E-01 | 1.75E-01 |
| 405.75218 | 25.59  | 16.56 | 17.38 | 16.58 | 16.58 | 3.51E-02 | 5.46E-02 | 1.00E+00 | 1.00E+00 | 7.22E-02 | 8.72E-02 | 1.00E+00 |
| 405.76936 | 26     | 15.38 | 16.44 | 14.87 | 16.15 | 4.39E-04 | 3.56E-02 | 5.49E-01 | 2.19E-01 | 6.46E-04 | 8.98E-01 | 1.05E-02 |
| 405.81207 | 48.47  | 15.69 | 17.72 | 17.83 | 17.53 | 1.66E-47 | 3.65E-14 | 3.65E-14 | 3.65E-14 | 8.28E-01 | 4.89E-01 | 1.10E-01 |
| 405.85776 | 46.3   | 17.00 | 13.50 | 13.81 | 13.91 | 1.14E-19 | 7.52E-14 | 9.38E-14 | 5.80E-13 | 8.46E-01 | 7.38E-01 | 9.96E-01 |
| 405.89551 | 53.38  | 18.91 | 17.91 | 18.42 | 16.75 | 2.30E-12 | 1.39E-03 | 2.47E-01 | 8.55E-13 | 2.58E-01 | 2.90E-04 | 5.74E-08 |
| 405.9728  | 60.03  | 16.18 | 14.64 | 17.40 | 16.77 | 1.31E-13 | 2.25E-05 | 1.07E-03 | 2.89E-01 | 1.38E-13 | 1.67E-08 | 2.52E-01 |
| 405.9851  | 62.72  | 17.71 | 17.27 | 17.76 | 16.81 | 6.57E-04 | 2.70E-01 | 9.98E-01 | 2.00E-03 | 2.12E-01 | 2.74E-01 | 1.45E-03 |
| 406.01504 | 71.47  | 13.87 | 18.12 | 17.85 | 17.48 | 5.30E-32 | 3.67E-14 | 3.90E-14 | 7.05E-14 | 8.55E-01 | 2.76E-01 | 7.28E-01 |

|           |        |       |       |       |       |          |          |          |          |          |          |          |
|-----------|--------|-------|-------|-------|-------|----------|----------|----------|----------|----------|----------|----------|
| 406.09555 | 79.98  | 16.12 | 16.52 | 15.51 | 16.79 | 2.08E-02 | 7.57E-01 | 4.41E-01 | 3.87E-01 | 7.77E-02 | 9.29E-01 | 1.75E-02 |
| 406.13415 | 75.52  | 19.66 | 17.75 | 16.40 | 17.48 | 2.84E-24 | 2.30E-10 | 3.87E-14 | 1.90E-12 | 1.55E-05 | 7.77E-01 | 1.30E-03 |
| 406.14573 | 97.47  | 16.04 | 17.21 | 17.35 | 17.51 | 4.56E-10 | 3.62E-06 | 1.14E-07 | 9.48E-09 | 9.24E-01 | 5.93E-01 | 9.14E-01 |
| 406.18208 | 64.58  | 16.25 | 16.11 | 15.69 | 15.28 | 2.80E-04 | 9.20E-01 | 6.93E-02 | 3.01E-04 | 2.97E-01 | 4.40E-03 | 3.18E-01 |
| 406.24293 | 27.42  | 17.16 | 18.56 | 18.35 | 18.71 | 7.16E-24 | 7.43E-14 | 1.11E-13 | 6.92E-14 | 4.66E-01 | 7.60E-01 | 7.81E-02 |
| 406.67934 | 48.79  | 19.21 | 19.78 | 19.77 | 19.11 | 1.74E-03 | 3.84E-02 | 4.08E-02 | 9.67E-01 | 1.00E+00 | 1.65E-02 | 1.75E-02 |
| 406.74814 | 28.65  | 20.46 | 20.59 | 19.27 | 20.67 | 7.59E-23 | 7.81E-01 | 7.38E-14 | 4.41E-01 | 7.38E-14 | 9.44E-01 | 7.46E-02 |
| 406.76528 | 40.61  | 18.97 | 21.21 | 20.98 | 20.81 | 1.96E-40 | 3.65E-14 | 3.65E-14 | 3.74E-14 | 4.26E-01 | 5.49E-02 | 6.96E-01 |
| 406.85584 | 30.98  | 17.56 | 13.65 | 13.65 | 14.58 | 3.76E-24 | 7.12E-14 | 7.03E-14 | 2.69E-12 | 1.00E+00 | 9.05E-02 | 8.78E-02 |
| 406.88891 | 50.74  | 20.65 | 20.89 | 21.43 | 20.57 | 1.34E-04 | 6.21E-01 | 5.64E-04 | 9.76E-01 | 4.19E-02 | 4.13E-01 | 2.78E-04 |
| 406.92177 | 144.24 | 11.67 | 12.69 | 16.55 | 13.47 | 6.32E-16 | 2.41E-01 | 7.45E-14 | 7.86E-03 | 2.29E-10 | 5.30E-01 | 9.07E-07 |
| 406.99855 | 55.58  | 16.74 | 15.78 | 15.56 | 15.96 | 4.62E-03 | 2.88E-02 | 3.76E-03 | 1.22E-01 | 9.30E-01 | 9.61E-01 | 6.99E-01 |
| 407.01215 | 73.89  | 15.31 | 17.72 | 18.03 | 16.97 | 6.36E-38 | 3.65E-14 | 3.65E-14 | 7.61E-14 | 3.30E-01 | 6.66E-04 | 3.61E-07 |
| 407.09144 | 79.9   | 14.73 | 17.34 | 15.40 | 16.53 | 5.29E-08 | 7.22E-08 | 4.19E-01 | 5.48E-04 | 1.51E-04 | 3.06E-01 | 7.29E-02 |
| 407.23608 | 28.6   | 17.81 | 19.34 | 18.38 | 16.09 | 2.82E-17 | 1.44E-05 | 2.69E-01 | 1.59E-06 | 1.73E-02 | 7.25E-14 | 3.19E-10 |
| 407.25012 | 28.98  | 19.45 | 19.59 | 18.61 | 19.73 | 3.66E-14 | 7.29E-01 | 1.16E-08 | 1.81E-01 | 1.21E-10 | 7.56E-01 | 8.96E-13 |
| 407.26053 | 26.12  | 15.83 | 17.70 | 16.45 | 17.78 | 9.30E-17 | 8.23E-13 | 4.33E-02 | 4.39E-13 | 3.22E-06 | 9.90E-01 | 1.33E-06 |
| 407.31518 | 23.81  | 17.70 | 13.17 | 14.82 | 15.28 | 5.54E-21 | 5.85E-14 | 1.12E-10 | 2.00E-07 | 7.24E-04 | 1.37E-05 | 6.99E-01 |
| 407.54989 | 203.04 | 10.59 | 13.72 | 14.52 | 13.76 | 2.51E-13 | 1.98E-08 | 1.47E-12 | 3.14E-08 | 4.20E-01 | 1.00E+00 | 4.86E-01 |
| 407.75548 | 32.88  | 19.64 | 19.77 | 18.36 | 19.77 | 6.99E-30 | 6.69E-01 | 5.76E-14 | 6.94E-01 | 4.12E-14 | 1.00E+00 | 4.61E-14 |
| 407.76694 | 27.02  | 17.11 | 21.16 | 20.03 | 20.75 | 3.77E-40 | 3.65E-14 | 5.05E-14 | 3.65E-14 | 1.67E-04 | 4.43E-01 | 4.11E-02 |
| 407.85529 | 46.28  | 17.06 | 14.59 | 15.17 | 14.77 | 8.76E-18 | 7.63E-14 | 3.32E-10 | 3.59E-13 | 1.78E-01 | 9.29E-01 | 5.18E-01 |
| 407.8924  | 52.11  | 17.04 | 16.25 | 16.42 | 15.21 | 2.52E-08 | 2.41E-02 | 1.05E-01 | 3.19E-09 | 9.38E-01 | 2.20E-03 | 2.28E-04 |
| 407.94423 | 53.5   | 14.68 | 15.72 | 15.81 | 15.12 | 1.05E-05 | 2.15E-04 | 3.74E-05 | 3.03E-01 | 9.84E-01 | 1.04E-01 | 4.15E-02 |
| 407.99559 | 41.37  | 14.19 | 13.85 | 12.15 | 14.80 | 1.93E-08 | 8.40E-01 | 5.61E-06 | 4.75E-01 | 3.81E-04 | 1.32E-01 | 1.94E-08 |
| 408.00885 | 138.02 | 11.98 | 17.27 | 11.17 | 15.34 | 7.37E-14 | 7.75E-10 | 7.29E-01 | 2.55E-04 | 5.38E-12 | 9.39E-02 | 5.43E-06 |
| 408.02923 | 244.42 | 12.40 | 13.96 | 9.83  | 12.10 | 1.60E-10 | 2.39E-02 | 2.24E-05 | 9.51E-01 | 1.93E-11 | 8.06E-03 | 5.98E-04 |
| 408.06016 | 94.25  | 15.47 | 17.70 | 16.78 | 16.54 | 2.48E-40 | 3.65E-14 | 7.26E-14 | 2.69E-13 | 2.46E-10 | 9.89E-14 | 3.00E-01 |
| 408.25747 | 26.02  | 18.20 | 18.46 | 17.35 | 18.59 | 5.50E-16 | 2.50E-01 | 2.15E-08 | 3.18E-02 | 1.94E-12 | 7.94E-01 | 9.43E-14 |
| 408.26867 | 27.1   | 16.23 | 19.96 | 18.87 | 19.72 | 3.86E-37 | 3.65E-14 | 7.12E-14 | 3.65E-14 | 2.98E-04 | 8.21E-01 | 9.89E-03 |
| 408.29279 | 22.84  | 17.36 | 15.77 | 16.45 | 16.94 | 3.49E-11 | 1.60E-11 | 1.51E-04 | 2.24E-01 | 1.25E-02 | 3.60E-06 | 1.32E-01 |
| 408.62636 | 51.59  | 19.16 | 17.31 | 16.00 | 17.33 | 1.87E-20 | 7.45E-09 | 6.03E-14 | 2.50E-08 | 1.11E-04 | 1.00E+00 | 1.36E-04 |
| 408.6771  | 49.11  | 17.91 | 18.39 | 18.39 | 17.92 | 2.22E-02 | 9.86E-02 | 9.72E-02 | 1.00E+00 | 1.00E+00 | 1.37E-01 | 1.36E-01 |
| 408.74522 | 26.08  | 14.90 | 19.32 | 17.38 | 18.45 | 3.17E-43 | 3.65E-14 | 7.43E-14 | 3.65E-14 | 1.82E-11 | 8.59E-03 | 5.33E-04 |
| 408.76829 | 40.39  | 19.26 | 21.81 | 21.23 | 21.58 | 4.45E-37 | 3.65E-14 | 5.03E-14 | 3.67E-14 | 8.03E-03 | 6.12E-01 | 2.29E-01 |
| 408.85419 | 37.01  | 18.14 | 14.98 | 15.25 | 15.58 | 2.49E-21 | 7.56E-14 | 7.43E-14 | 1.57E-12 | 8.55E-01 | 2.90E-01 | 7.45E-01 |
| 408.88596 | 50.63  | 19.72 | 19.91 | 20.41 | 19.48 | 2.20E-04 | 8.09E-01 | 4.66E-03 | 6.42E-01 | 7.99E-02 | 1.97E-01 | 1.25E-04 |
| 408.92405 | 53.83  | 16.87 | 15.36 | 17.41 | 15.73 | 2.03E-10 | 1.12E-05 | 2.88E-01 | 2.27E-03 | 3.19E-09 | 6.63E-01 | 2.88E-06 |
| 408.95451 | 40.99  | 15.74 | 17.94 | 17.60 | 17.46 | 1.30E-45 | 3.65E-14 | 3.65E-14 | 3.65E-14 | 4.33E-02 | 2.84E-03 | 7.61E-01 |
| 409.02253 | 72.01  | 10.02 | 14.94 | 12.01 | 12.54 | 4.66E-10 | 4.35E-11 | 1.76E-02 | 2.08E-03 | 2.21E-04 | 5.51E-03 | 8.81E-01 |
| 409.05446 | 265.63 | 14.13 | 15.84 | 16.69 | 14.94 | 3.68E-21 | 1.15E-10 | 6.61E-14 | 6.85E-03 | 3.73E-03 | 2.95E-03 | 3.02E-10 |
| 409.08459 | 236.3  | 16.10 | 20.98 | 21.41 | 19.65 | 4.95E-27 | 6.47E-14 | 4.16E-14 | 5.14E-12 | 7.92E-01 | 3.04E-02 | 1.55E-03 |
| 409.18406 | 30.56  | 17.85 | 19.18 | 18.32 | 19.97 | 1.93E-17 | 5.17E-08 | 1.38E-01 | 7.44E-14 | 1.26E-03 | 5.20E-03 | 1.41E-10 |
| 409.19955 | 29.35  | 18.43 | 18.44 | 19.10 | 19.79 | 1.34E-09 | 1.00E+00 | 9.94E-03 | 1.58E-08 | 1.59E-02 | 5.65E-08 | 1.18E-02 |
| 409.24705 | 32.67  | 12.76 | 18.16 | 16.89 | 16.73 | 6.32E-35 | 3.65E-14 | 5.07E-14 | 7.07E-14 | 5.52E-03 | 1.91E-03 | 9.75E-01 |
| 409.27148 | 116.81 | 14.96 | 15.83 | 12.55 | 15.34 | 4.15E-09 | 3.27E-01 | 1.66E-05 | 8.85E-01 | 9.05E-09 | 8.06E-01 | 2.13E-06 |
| 409.27298 | 45.09  | 21.21 | 20.86 | 21.00 | 20.92 | 1.66E-04 | 1.41E-04 | 4.11E-02 | 3.37E-03 | 3.61E-01 | 8.96E-01 | 8.11E-01 |
| 409.72335 | 49.44  | 17.43 | 15.12 | 14.68 | 13.12 | 7.30E-13 | 6.77E-05 | 1.06E-06 | 2.24E-13 | 8.39E-01 | 1.69E-03 | 2.17E-02 |
| 409.75403 | 34.25  | 19.04 | 22.78 | 21.14 | 22.08 | 1.78E-78 | 3.65E-14 | 3.65E-14 | 3.65E-14 | 3.72E-14 | 3.07E-06 | 2.21E-10 |
| 409.78067 | 30.62  | 15.02 | 18.63 | 17.91 | 18.55 | 2.31E-45 | 3.65E-14 | 3.65E-14 | 3.65E-14 | 9.67E-03 | 9.89E-01 | 3.09E-02 |
| 409.92075 | 43.42  | 15.86 | 17.88 | 17.86 | 18.08 | 2.30E-39 | 3.65E-14 | 3.65E-14 | 3.65E-14 | 9.99E-01 | 5.84E-01 | 4.80E-01 |
| 410.00577 | 85.96  | 17.96 | 12.83 | 13.34 | 15.50 | 2.06E-28 | 3.85E-14 | 5.81E-14 | 2.94E-07 | 6.41E-01 | 5.94E-08 | 1.32E-05 |
| 410.04464 | 79.69  | 16.29 | 16.36 | 15.86 | 16.63 | 1.21E-01 | 9.95E-01 | 4.92E-01 | 6.96E-01 | 3.75E-01 | 8.44E-01 | 8.03E-02 |
| 410.06866 | 207.34 | 15.30 | 15.56 | 16.54 | 17.58 | 9.06E-10 | 8.73E-01 | 1.63E-03 | 3.06E-09 | 2.65E-02 | 3.99E-07 | 2.23E-02 |
| 410.08791 | 230.6  | 15.61 | 17.40 | 17.97 | 16.98 | 6.97E-23 | 9.43E-14 | 5.10E-14 | 9.42E-09 | 4.65E-02 | 2.24E-01 | 6.90E-05 |
| 410.20141 | 32.95  | 15.66 | 14.51 | 15.50 | 17.09 | 1.35E-05 | 6.86E-02 | 9.87E-01 | 1.67E-02 | 1.63E-01 | 2.50E-06 | 7.66E-03 |
| 410.25593 | 24.27  | 17.40 | 21.63 | 20.00 | 20.83 | 5.70E-62 | 3.65E-14 | 3.65E-14 | 3.65E-14 | 7.87E-14 | 2.70E-04 | 1.42E-04 |
| 410.27485 | 45.61  | 18.97 | 17.74 | 17.98 | 17.98 | 7.50E-38 | 3.65E-14 | 3.74E-14 | 4.16E-14 | 2.22E-02 | 2.44E-02 | 1.00E+00 |
| 410.28845 | 24.52  | 16.64 | 17.90 | 17.03 | 18.09 | 1.63E-10 | 3.04E-07 | 3.04E-01 | 8.51E-09 | 9.80E-04 | 8.56E-01 | 5.61E-05 |
| 410.62327 | 44.99  | 20.00 | 17.45 | 17.57 | 17.29 | 1.34E-16 | 1.87E-12 | 9.90E-12 | 3.56E-13 | 9.87E-01 | 9.63E-01 | 8.47E-01 |
| 410.67712 | 48.27  | 16.09 | 15.27 | 15.15 | 15.34 | 3.04E-04 | 3.51E-03 | 4.74E-04 | 1.18E-02 | 9.60E-01 | 9.93E-01 | 8.72E-01 |
| 410.73325 | 25.45  | 16.15 | 10.72 | 13.73 | 10.75 | 7.05E-28 | 4.67E-14 | 3.35E-06 | 5.63E-14 | 1.58E-08 | 1.00E+00 | 4.87E-08 |
| 410.75019 | 25.15  | 17.00 | 11.80 | 12.32 | 12.88 | 7.11E-79 | 3.65E-14 | 3.65E-14 | 3.65E-14 | 3.87E-02 | 1.01E-06 | 2.60E-02 |
| 410.7629  | 33.11  | 20.62 | 24.95 | 23.36 | 24.28 | 2.88E-72 | 3.65E-14 | 3.65E-14 | 3.65E-14 | 7.27E-14 | 7.21E-04 | 1.49E-06 |
| 410.8508  | 46.38  | 18.29 | 19.33 | 19.50 | 19.66 | 2.79E-16 | 2.44E-09 | 2.62E-12 | 1.06E-13 | 7.11E-01 | 2.02E-01 | 7.79E-01 |
| 410.88319 | 50.64  | 17.26 | 16.77 | 17.03 | 15.92 | 5.65E-05 | 3.03E-01 | 8.28E-01 | 2.84E-05 | 8.17E-01 | 2.15E-02 | 1.16E-03 |
| 410.92294 | 29.94  | 14.16 | 15.52 | 16.03 | 15.60 | 7.73E-12 | 1.03E-06 | 1.07E-11 | 4.65E-07 | 2.07E-01 | 9.92E-01 | 3.70E-01 |
| 410.94457 | 48.44  | 15.11 | 15.53 | 14.37 | 15.27 | 6.43E-03 | 6.02E-01 | 1.05E-01 | 9.68E-01 | 4.13E-03 | 8.85E-01 | 4.84E-02 |

|           |        |       |       |       |       |          |          |          |          |          |          |          |
|-----------|--------|-------|-------|-------|-------|----------|----------|----------|----------|----------|----------|----------|
| 410.95652 | 76.8   | 14.31 | 14.72 | 15.67 | 15.19 | 1.85E-03 | 6.73E-01 | 1.10E-03 | 8.61E-02 | 5.28E-02 | 6.07E-01 | 5.89E-01 |
| 411.02037 | 301.39 | 14.64 | 18.26 | 17.69 | 15.70 | 3.29E-41 | 3.65E-14 | 3.65E-14 | 8.37E-05 | 8.43E-02 | 7.14E-14 | 2.31E-13 |
| 411.05735 | 36.89  | 8.37  | 10.37 | 13.84 | 11.50 | 5.98E-22 | 3.16E-04 | 5.03E-14 | 1.19E-08 | 2.55E-10 | 1.32E-01 | 4.71E-05 |
| 411.07222 | 204.91 | 16.09 | 17.52 | 17.98 | 18.12 | 2.57E-13 | 1.24E-06 | 8.26E-11 | 1.96E-11 | 3.44E-01 | 1.61E-01 | 9.64E-01 |
| 411.0803  | 227.61 | 14.78 | 16.35 | 16.60 | 15.96 | 3.23E-17 | 1.66E-12 | 7.43E-14 | 2.25E-07 | 6.26E-01 | 2.64E-01 | 1.52E-02 |
| 411.12133 | 60.37  | 15.95 | 13.15 | 15.12 | 14.58 | 2.12E-09 | 4.20E-10 | 1.68E-01 | 6.59E-03 | 2.76E-05 | 6.25E-03 | 5.92E-01 |
| 411.21893 | 22.76  | 16.26 | 9.16  | 9.71  | 10.33 | 4.56E-77 | 3.65E-14 | 3.65E-14 | 3.65E-14 | 1.89E-01 | 2.95E-04 | 1.23E-01 |
| 411.25027 | 44.12  | 19.89 | 16.76 | 17.06 | 16.76 | 2.03E-57 | 3.65E-14 | 3.65E-14 | 3.65E-14 | 2.87E-01 | 1.00E+00 | 2.88E-01 |
| 411.26349 | 29.22  | 19.76 | 23.91 | 22.20 | 23.06 | 4.41E-64 | 3.65E-14 | 3.65E-14 | 3.65E-14 | 7.34E-14 | 3.38E-05 | 1.93E-05 |
| 411.52174 | 304    | 14.26 | 15.40 | 14.86 | 13.14 | 2.36E-13 | 1.07E-04 | 9.59E-02 | 2.75E-04 | 1.80E-01 | 2.28E-13 | 1.26E-08 |
| 411.73299 | 29.22  | 12.67 | 13.53 | 16.40 | 13.99 | 3.39E-06 | 6.09E-01 | 1.30E-06 | 2.62E-01 | 5.49E-04 | 9.28E-01 | 7.04E-03 |
| 411.75146 | 39.27  | 17.59 | 16.33 | 14.33 | 15.88 | 1.42E-10 | 2.50E-02 | 1.45E-11 | 1.31E-03 | 9.65E-05 | 7.81E-01 | 5.29E-03 |
| 411.76801 | 25.87  | 17.94 | 22.37 | 20.77 | 21.75 | 2.59E-70 | 3.65E-14 | 3.65E-14 | 3.65E-14 | 7.43E-14 | 4.71E-03 | 1.11E-06 |
| 411.77795 | 26.47  | 14.98 | 11.53 | 16.28 | 13.27 | 7.02E-36 | 5.30E-14 | 1.83E-04 | 1.04E-06 | 3.65E-14 | 1.37E-06 | 7.45E-14 |
| 411.84091 | 50.72  | 16.91 | 15.41 | 15.58 | 14.28 | 3.29E-09 | 4.92E-04 | 2.28E-03 | 4.26E-10 | 9.72E-01 | 2.37E-02 | 5.94E-03 |
| 411.85264 | 60.93  | 16.41 | 18.13 | 18.52 | 18.41 | 2.57E-31 | 7.36E-14 | 3.67E-14 | 4.43E-14 | 1.16E-01 | 4.10E-01 | 9.24E-01 |
| 411.92146 | 33.31  | 14.15 | 15.23 | 15.44 | 16.06 | 2.03E-13 | 1.59E-05 | 1.48E-07 | 1.51E-13 | 8.10E-01 | 3.47E-03 | 4.46E-02 |
| 412.0241  | 47.49  | 14.60 | 14.95 | 15.91 | 15.75 | 9.83E-07 | 5.43E-01 | 6.44E-06 | 1.65E-04 | 2.64E-03 | 2.21E-02 | 9.46E-01 |
| 412.05029 | 184.85 | 14.98 | 14.34 | 14.61 | 13.89 | 3.57E-03 | 1.21E-01 | 5.67E-01 | 1.68E-03 | 7.98E-01 | 4.59E-01 | 8.58E-02 |
| 412.11298 | 287.13 | 16.36 | 18.80 | 19.20 | 17.51 | 4.39E-33 | 4.39E-14 | 3.65E-14 | 1.46E-06 | 2.59E-01 | 1.36E-07 | 3.96E-12 |
| 412.13846 | 103.75 | 16.52 | 17.47 | 18.70 | 19.94 | 2.34E-52 | 2.01E-07 | 3.65E-14 | 3.65E-14 | 3.07E-11 | 3.65E-14 | 7.38E-11 |
| 412.25332 | 36.01  | 17.21 | 16.96 | 14.36 | 15.63 | 1.96E-14 | 8.96E-01 | 4.02E-13 | 1.41E-04 | 1.08E-10 | 2.95E-03 | 4.93E-03 |
| 412.27155 | 26.46  | 17.36 | 21.35 | 19.79 | 20.74 | 9.16E-64 | 3.65E-14 | 3.65E-14 | 3.65E-14 | 7.49E-14 | 4.53E-03 | 1.60E-06 |
| 412.30524 | 24.55  | 18.49 | 19.69 | 19.28 | 18.32 | 3.06E-05 | 5.78E-04 | 4.53E-02 | 9.55E-01 | 5.46E-01 | 1.88E-04 | 1.65E-02 |
| 412.32091 | 23.38  | 20.43 | 19.28 | 16.77 | 21.75 | 3.71E-21 | 5.07E-02 | 1.29E-13 | 2.12E-02 | 5.26E-07 | 2.11E-06 | 6.65E-14 |
| 412.3418  | 23.11  | 16.60 | 16.18 | 16.83 | 13.71 | 8.30E-07 | 8.82E-01 | 9.77E-01 | 8.36E-06 | 6.81E-01 | 3.21E-04 | 2.31E-06 |
| 412.4281  | 308.24 | 12.96 | 13.95 | 13.84 | 13.30 | 7.68E-05 | 2.26E-04 | 1.10E-03 | 4.77E-01 | 9.73E-01 | 5.22E-02 | 1.34E-01 |
| 412.55865 | 303.12 | 15.24 | 18.85 | 18.09 | 16.56 | 2.19E-21 | 7.13E-14 | 1.42E-13 | 1.61E-03 | 1.50E-01 | 1.35E-08 | 2.08E-04 |
| 412.62004 | 44.91  | 19.95 | 17.71 | 17.19 | 17.33 | 5.51E-23 | 1.31E-13 | 7.12E-14 | 7.36E-14 | 2.36E-01 | 5.52E-01 | 9.57E-01 |
| 412.70945 | 44.81  | 17.48 | 18.95 | 18.91 | 18.41 | 1.20E-24 | 6.47E-14 | 6.85E-14 | 1.79E-09 | 9.95E-01 | 1.39E-03 | 2.84E-03 |
| 412.71748 | 47.75  | 17.69 | 19.33 | 19.32 | 18.82 | 1.27E-12 | 1.07E-10 | 9.84E-11 | 2.00E-05 | 1.00E+00 | 1.65E-01 | 1.76E-01 |
| 412.76127 | 39.54  | 16.15 | 19.54 | 18.05 | 18.80 | 1.38E-26 | 3.72E-14 | 2.20E-10 | 7.38E-14 | 1.56E-06 | 5.32E-02 | 4.89E-02 |
| 412.77761 | 28.34  | 18.18 | 21.83 | 20.56 | 21.50 | 7.11E-79 | 3.65E-14 | 3.65E-14 | 3.65E-14 | 7.54E-14 | 8.20E-02 | 3.31E-10 |
| 412.84425 | 45.22  | 15.04 | 14.68 | 14.64 | 14.60 | 2.41E-01 | 4.49E-01 | 3.30E-01 | 2.87E-01 | 9.98E-01 | 9.88E-01 | 9.99E-01 |
| 412.85878 | 28.52  | 18.67 | 19.35 | 19.76 | 19.50 | 1.40E-07 | 1.97E-03 | 7.65E-08 | 1.09E-04 | 1.35E-01 | 8.49E-01 | 5.64E-01 |
| 412.89788 | 45.31  | 14.39 | 15.75 | 15.38 | 15.97 | 1.58E-05 | 3.01E-04 | 1.43E-02 | 2.74E-05 | 6.91E-01 | 9.14E-01 | 3.11E-01 |
| 412.94357 | 49.43  | 14.32 | 15.12 | 14.91 | 15.29 | 1.39E-03 | 1.04E-02 | 8.77E-02 | 1.40E-03 | 8.64E-01 | 9.15E-01 | 4.91E-01 |
| 412.98758 | 47.6   | 14.31 | 14.58 | 15.26 | 15.64 | 5.35E-02 | 9.50E-01 | 2.46E-01 | 5.94E-02 | 5.78E-01 | 2.16E-01 | 8.95E-01 |
| 413.02935 | 259.65 | 17.05 | 17.63 | 17.46 | 16.11 | 3.42E-06 | 1.66E-01 | 4.62E-01 | 7.43E-03 | 9.30E-01 | 4.39E-06 | 5.23E-05 |
| 413.06039 | 305.18 | 15.50 | 16.66 | 15.26 | 14.35 | 3.75E-15 | 1.24E-05 | 7.55E-01 | 3.41E-05 | 2.11E-07 | 7.56E-14 | 2.14E-03 |
| 413.07114 | 49.31  | 16.50 | 15.22 | 16.37 | 16.16 | 2.61E-04 | 2.53E-04 | 9.69E-01 | 7.02E-01 | 1.95E-03 | 2.17E-02 | 9.23E-01 |
| 413.117   | 78.56  | 13.17 | 14.76 | 13.59 | 14.45 | 1.74E-02 | 2.14E-02 | 8.66E-01 | 1.08E-01 | 1.63E-01 | 9.51E-01 | 4.45E-01 |
| 413.14075 | 82.01  | 13.83 | 11.07 | 12.45 | 16.44 | 1.53E-34 | 2.75E-13 | 3.53E-04 | 9.09E-12 | 5.53E-04 | 3.65E-14 | 5.32E-14 |
| 413.26517 | 46.78  | 20.38 | 19.57 | 19.04 | 18.72 | 1.38E-21 | 2.27E-06 | 7.63E-14 | 7.12E-14 | 5.00E-03 | 2.67E-06 | 2.04E-01 |
| 413.27907 | 28.75  | 17.36 | 20.75 | 19.47 | 20.45 | 7.12E-74 | 3.65E-14 | 3.65E-14 | 3.65E-14 | 7.36E-14 | 1.19E-01 | 5.26E-11 |
| 413.30888 | 22.96  | 16.13 | 17.06 | 16.54 | 15.34 | 2.00E-04 | 5.68E-02 | 6.80E-01 | 1.52E-01 | 5.01E-01 | 8.08E-05 | 1.10E-02 |
| 413.3242  | 23.49  | 18.53 | 16.43 | 13.28 | 19.77 | 1.78E-25 | 5.88E-04 | 7.37E-14 | 1.10E-01 | 1.50E-07 | 6.90E-08 | 4.36E-14 |
| 413.73831 | 25.3   | 15.37 | 18.34 | 16.44 | 17.65 | 2.76E-26 | 3.90E-14 | 1.06E-04 | 7.43E-14 | 9.49E-12 | 4.11E-02 | 3.73E-05 |
| 413.74901 | 30.91  | 15.43 | 18.43 | 18.30 | 17.80 | 8.14E-29 | 4.10E-14 | 4.72E-14 | 7.49E-14 | 9.61E-01 | 9.39E-02 | 2.42E-01 |
| 413.76549 | 25.28  | 15.29 | 13.30 | 15.79 | 14.61 | 2.17E-09 | 1.02E-06 | 5.32E-01 | 2.78E-01 | 2.03E-09 | 5.08E-03 | 1.44E-02 |
| 413.78285 | 25.03  | 15.75 | 17.82 | 16.42 | 17.95 | 6.30E-18 | 2.72E-13 | 4.28E-02 | 1.06E-13 | 1.20E-06 | 9.63E-01 | 2.06E-07 |
| 413.83841 | 50.66  | 15.66 | 13.73 | 14.10 | 12.99 | 4.51E-08 | 5.47E-05 | 1.62E-03 | 2.61E-08 | 8.23E-01 | 3.59E-01 | 6.30E-02 |
| 413.84795 | 51.36  | 15.85 | 18.08 | 18.20 | 17.76 | 8.59E-52 | 3.65E-14 | 3.65E-14 | 3.65E-14 | 7.93E-01 | 9.76E-02 | 7.62E-03 |
| 413.87409 | 101.59 | 14.47 | 12.28 | 14.34 | 13.79 | 3.38E-03 | 3.71E-03 | 9.97E-01 | 7.21E-01 | 9.51E-03 | 1.15E-01 | 8.42E-01 |
| 413.8875  | 67.68  | 14.94 | 15.75 | 15.81 | 14.82 | 8.13E-06 | 3.51E-03 | 1.09E-03 | 9.55E-01 | 9.92E-01 | 1.17E-03 | 3.59E-04 |
| 413.99822 | 70.98  | 20.07 | 21.10 | 21.99 | 21.66 | 6.64E-17 | 1.28E-05 | 7.31E-14 | 2.60E-11 | 3.07E-04 | 6.14E-02 | 4.44E-01 |
| 414.00713 | 54.17  | 21.47 | 21.07 | 21.38 | 20.92 | 3.23E-02 | 2.04E-01 | 9.74E-01 | 4.49E-02 | 4.33E-01 | 9.00E-01 | 1.35E-01 |
| 414.02657 | 74.91  | 15.91 | 15.90 | 15.37 | 14.41 | 9.29E-03 | 1.00E+00 | 6.59E-01 | 1.14E-02 | 6.98E-01 | 1.64E-02 | 2.09E-01 |
| 414.03802 | 102.97 | 15.46 | 16.09 | 14.06 | 15.46 | 3.62E-11 | 9.12E-02 | 1.53E-06 | 1.00E+00 | 1.39E-11 | 1.19E-01 | 6.77E-06 |
| 414.06508 | 257.21 | 13.92 | 16.22 | 14.50 | 14.47 | 1.18E-07 | 5.39E-08 | 4.24E-01 | 5.08E-01 | 1.17E-04 | 1.50E-04 | 1.00E+00 |
| 414.16015 | 132.28 | 15.99 | 17.52 | 17.32 | 17.05 | 7.36E-14 | 8.45E-13 | 2.50E-10 | 1.48E-06 | 7.51E-01 | 1.01E-01 | 5.34E-01 |
| 414.21517 | 35.05  | 17.66 | 20.06 | 20.19 | 18.97 | 3.94E-26 | 6.69E-14 | 5.01E-14 | 2.74E-07 | 9.50E-01 | 4.61E-05 | 3.57E-06 |
| 414.23989 | 24.89  | 15.47 | 16.99 | 15.34 | 16.79 | 4.09E-12 | 5.41E-08 | 9.62E-01 | 5.57E-06 | 9.28E-09 | 8.76E-01 | 1.07E-06 |
| 414.2534  | 58.13  | 14.67 | 16.94 | 17.41 | 16.20 | 5.22E-19 | 3.76E-13 | 7.49E-14 | 1.91E-06 | 3.66E-01 | 6.35E-02 | 3.35E-04 |
| 414.26922 | 45.59  | 18.51 | 16.60 | 16.41 | 16.29 | 9.20E-18 | 1.13E-11 | 1.53E-13 | 9.78E-14 | 8.94E-01 | 6.58E-01 | 9.65E-01 |
| 414.32117 | 23.93  | 20.37 | 21.88 | 20.82 | 20.45 | 1.71E-11 | 7.22E-11 | 1.42E-01 | 9.80E-01 | 1.03E-05 | 6.16E-09 | 3.58E-01 |
| 414.3576  | 23.04  | 19.41 | 18.81 | 18.87 | 18.75 | 6.00E-03 | 2.08E-02 | 4.63E-02 | 1.17E-02 | 9.90E-01 | 9.94E-01 | 9.44E-01 |
| 414.58853 | 59.42  | 15.18 | 16.15 | 16.29 | 15.57 | 4.37E-08 | 9.39E-06 | 2.52E-07 | 2.25E-01 | 9.06E-01 | 2.79E-02 | 3.28E-03 |

|           |        |       |       |       |       |          |          |          |          |          |          |          |
|-----------|--------|-------|-------|-------|-------|----------|----------|----------|----------|----------|----------|----------|
| 414.61828 | 49.25  | 18.84 | 16.16 | 15.89 | 15.91 | 4.18E-19 | 5.13E-13 | 7.44E-14 | 9.46E-14 | 8.68E-01 | 9.02E-01 | 1.00E+00 |
| 414.70735 | 45     | 17.77 | 19.18 | 19.28 | 18.85 | 2.54E-24 | 7.26E-14 | 6.12E-14 | 9.43E-12 | 9.02E-01 | 1.10E-01 | 1.83E-02 |
| 414.71467 | 47.78  | 18.47 | 20.14 | 20.19 | 19.76 | 1.76E-13 | 6.51E-11 | 1.05E-11 | 1.03E-06 | 9.96E-01 | 4.14E-01 | 2.86E-01 |
| 414.73474 | 40.72  | 16.82 | 11.50 | 12.05 | 12.54 | 6.37E-80 | 3.65E-14 | 3.65E-14 | 3.65E-14 | 2.63E-02 | 3.78E-06 | 7.70E-02 |
| 414.74548 | 30.82  | 17.06 | 19.95 | 18.51 | 19.98 | 9.50E-48 | 3.65E-14 | 8.52E-14 | 3.65E-14 | 1.63E-13 | 9.97E-01 | 1.66E-13 |
| 414.75919 | 125.91 | 14.09 | 12.22 | 12.97 | 12.85 | 1.50E-01 | 1.04E-01 | 5.08E-01 | 4.54E-01 | 8.10E-01 | 8.85E-01 | 9.99E-01 |
| 414.76167 | 27.13  | 15.83 | 20.59 | 19.02 | 19.90 | 3.98E-44 | 3.65E-14 | 4.36E-14 | 3.65E-14 | 6.37E-07 | 8.99E-02 | 1.63E-02 |
| 414.77295 | 38.16  | 16.32 | 18.86 | 19.83 | 18.90 | 8.53E-40 | 4.21E-14 | 3.65E-14 | 4.39E-14 | 1.13E-04 | 9.97E-01 | 4.01E-04 |
| 414.84893 | 49.22  | 14.97 | 15.71 | 16.65 | 16.54 | 9.09E-17 | 1.11E-03 | 8.03E-14 | 1.82E-12 | 3.36E-05 | 5.96E-04 | 9.47E-01 |
| 414.88436 | 91.84  | 14.70 | 20.43 | 20.26 | 18.96 | 6.18E-30 | 3.83E-14 | 3.94E-14 | 7.67E-14 | 9.85E-01 | 1.90E-02 | 4.63E-02 |
| 414.97155 | 97.35  | 16.65 | 18.74 | 18.85 | 18.11 | 1.43E-13 | 6.88E-11 | 4.35E-12 | 1.22E-05 | 9.81E-01 | 1.77E-01 | 7.51E-02 |
| 414.98856 | 59.06  | 15.45 | 16.18 | 17.28 | 16.22 | 5.32E-10 | 2.27E-02 | 4.75E-11 | 1.99E-02 | 2.43E-04 | 9.99E-01 | 5.78E-04 |
| 415.00202 | 58.79  | 15.83 | 15.92 | 16.97 | 16.66 | 1.51E-03 | 9.94E-01 | 3.87E-03 | 7.74E-02 | 1.27E-02 | 1.58E-01 | 8.13E-01 |
| 415.0107  | 54.41  | 16.66 | 15.64 | 16.03 | 15.56 | 3.07E-03 | 8.98E-03 | 1.92E-01 | 5.24E-03 | 6.43E-01 | 9.95E-01 | 5.08E-01 |
| 415.04773 | 170.31 | 12.93 | 14.23 | 14.69 | 16.60 | 6.82E-06 | 2.12E-01 | 4.19E-02 | 1.28E-06 | 9.09E-01 | 5.20E-03 | 3.44E-02 |
| 415.04861 | 58.84  | 16.97 | 15.79 | 17.75 | 15.46 | 6.34E-12 | 1.14E-03 | 5.80E-02 | 2.77E-05 | 2.27E-08 | 7.62E-01 | 2.09E-10 |
| 415.1004  | 48.99  | 15.91 | 14.40 | 14.37 | 15.30 | 3.96E-05 | 3.17E-04 | 2.13E-04 | 3.82E-01 | 1.00E+00 | 9.28E-02 | 7.75E-02 |
| 415.15611 | 63.96  | 14.74 | 16.27 | 16.51 | 16.30 | 3.72E-07 | 5.88E-05 | 1.74E-06 | 6.65E-05 | 8.96E-01 | 1.00E+00 | 9.32E-01 |
| 415.21706 | 34.93  | 15.72 | 17.19 | 17.48 | 15.94 | 5.90E-08 | 1.00E-04 | 1.62E-06 | 9.24E-01 | 8.36E-01 | 2.68E-03 | 1.01E-04 |
| 415.23576 | 20.67  | 16.32 | 10.54 | 10.78 | 11.97 | 3.14E-46 | 3.65E-14 | 3.65E-14 | 3.74E-14 | 9.06E-01 | 7.28E-04 | 6.69E-03 |
| 415.24785 | 25.42  | 15.88 | 18.57 | 16.87 | 18.40 | 2.36E-24 | 6.87E-14 | 5.89E-04 | 7.34E-14 | 2.47E-09 | 9.22E-01 | 1.79E-07 |
| 415.26217 | 26.88  | 17.54 | 19.31 | 17.68 | 19.12 | 3.62E-18 | 2.72E-13 | 9.17E-01 | 1.28E-10 | 3.01E-11 | 8.41E-01 | 1.00E-08 |
| 415.27388 | 31.82  | 15.20 | 17.88 | 19.03 | 17.77 | 3.26E-35 | 6.96E-14 | 3.65E-14 | 7.45E-14 | 8.73E-05 | 9.76E-01 | 2.30E-05 |
| 415.32454 | 23.33  | 18.09 | 19.59 | 18.39 | 18.14 | 8.84E-10 | 5.07E-09 | 5.53E-01 | 9.96E-01 | 7.29E-06 | 1.08E-07 | 7.34E-01 |
| 415.36088 | 22.99  | 17.36 | 15.86 | 16.22 | 16.32 | 1.18E-08 | 1.10E-08 | 1.52E-05 | 1.89E-04 | 4.66E-01 | 2.71E-01 | 9.77E-01 |
| 415.754   | 24.78  | 16.75 | 19.46 | 18.10 | 19.38 | 1.19E-59 | 3.65E-14 | 6.96E-14 | 3.65E-14 | 7.32E-14 | 9.51E-01 | 7.54E-14 |
| 415.76965 | 33.13  | 17.82 | 20.94 | 19.80 | 20.35 | 1.12E-46 | 3.65E-14 | 4.23E-14 | 3.65E-14 | 2.80E-09 | 6.43E-03 | 1.37E-02 |
| 415.78084 | 34.43  | 14.45 | 15.59 | 17.95 | 14.96 | 3.77E-14 | 4.02E-02 | 1.30E-13 | 6.42E-01 | 8.25E-07 | 5.12E-01 | 1.00E-09 |
| 415.84248 | 50.08  | 13.36 | 16.10 | 15.90 | 15.29 | 4.26E-27 | 4.34E-14 | 6.16E-14 | 5.26E-13 | 8.44E-01 | 7.25E-03 | 6.66E-02 |
| 415.88836 | 46.1   | 17.34 | 17.56 | 17.66 | 17.74 | 2.44E-01 | 7.10E-01 | 4.02E-01 | 2.19E-01 | 9.66E-01 | 8.24E-01 | 9.76E-01 |
| 415.99372 | 59.23  | 16.83 | 17.71 | 18.84 | 18.41 | 5.90E-13 | 4.14E-03 | 9.19E-13 | 5.09E-08 | 1.56E-04 | 5.18E-02 | 3.87E-01 |
| 416.00333 | 55.33  | 18.98 | 18.52 | 18.88 | 18.51 | 4.89E-02 | 1.14E-01 | 9.63E-01 | 1.16E-01 | 3.12E-01 | 1.00E+00 | 3.09E-01 |
| 416.025   | 87.23  | 15.54 | 18.48 | 18.90 | 17.32 | 9.35E-22 | 7.41E-14 | 7.14E-14 | 1.30E-06 | 6.01E-01 | 4.83E-03 | 3.97E-05 |
| 416.05102 | 166.67 | 16.39 | 17.42 | 17.25 | 18.15 | 6.63E-04 | 5.80E-02 | 1.41E-01 | 2.06E-04 | 9.79E-01 | 3.25E-01 | 1.56E-01 |
| 416.25548 | 26.22  | 15.34 | 17.97 | 16.18 | 18.29 | 1.42E-17 | 1.86E-12 | 6.22E-02 | 9.58E-14 | 3.23E-06 | 8.15E-01 | 7.12E-08 |
| 416.2723  | 30.07  | 16.33 | 19.82 | 18.74 | 19.15 | 4.05E-50 | 3.65E-14 | 3.65E-14 | 3.65E-14 | 1.65E-07 | 3.64E-03 | 1.45E-01 |
| 416.28206 | 23.06  | 15.51 | 13.36 | 16.92 | 14.18 | 3.31E-24 | 1.01E-10 | 3.02E-05 | 1.60E-04 | 4.72E-14 | 5.49E-02 | 8.32E-14 |
| 416.33677 | 23.42  | 21.35 | 22.76 | 21.51 | 21.13 | 8.09E-11 | 1.64E-08 | 8.83E-01 | 7.91E-01 | 1.35E-06 | 7.61E-10 | 3.83E-01 |
| 416.61549 | 45.16  | 17.02 | 12.30 | 12.01 | 12.37 | 5.54E-26 | 7.27E-14 | 6.18E-14 | 7.36E-14 | 9.27E-01 | 9.99E-01 | 8.77E-01 |
| 416.70755 | 46.58  | 18.82 | 20.20 | 20.17 | 19.62 | 9.02E-14 | 9.10E-12 | 1.45E-11 | 1.81E-04 | 9.99E-01 | 1.77E-02 | 2.48E-02 |
| 416.75985 | 32.35  | 13.07 | 18.10 | 15.16 | 16.51 | 8.08E-20 | 7.23E-14 | 1.10E-04 | 2.23E-10 | 5.80E-08 | 1.13E-02 | 3.91E-02 |
| 416.77858 | 33.9   | 16.80 | 20.29 | 18.61 | 19.26 | 6.65E-47 | 3.65E-14 | 7.32E-14 | 3.65E-14 | 7.65E-14 | 1.51E-06 | 5.69E-03 |
| 416.79184 | 42.29  | 16.81 | 17.58 | 18.71 | 17.68 | 2.87E-18 | 2.99E-04 | 7.25E-14 | 5.14E-05 | 7.84E-08 | 9.56E-01 | 2.19E-06 |
| 416.80121 | 48.26  | 16.93 | 20.25 | 20.25 | 20.02 | 3.05E-33 | 3.72E-14 | 3.70E-14 | 5.05E-14 | 1.00E+00 | 8.58E-01 | 8.50E-01 |
| 416.81771 | 43.55  | 14.46 | 14.70 | 13.95 | 15.00 | 2.05E-02 | 8.85E-01 | 3.83E-01 | 3.83E-01 | 1.12E-01 | 8.26E-01 | 1.29E-02 |
| 416.88443 | 43.71  | 17.42 | 18.50 | 18.18 | 18.33 | 1.72E-07 | 2.92E-07 | 4.97E-04 | 3.34E-05 | 3.54E-01 | 8.41E-01 | 8.67E-01 |
| 416.89166 | 48.19  | 16.28 | 17.39 | 17.27 | 17.07 | 1.74E-06 | 4.74E-06 | 4.38E-05 | 2.68E-03 | 9.54E-01 | 5.24E-01 | 8.23E-01 |
| 416.91758 | 48.93  | 20.14 | 19.84 | 20.59 | 18.91 | 1.16E-08 | 6.19E-01 | 2.56E-01 | 1.30E-05 | 1.75E-02 | 2.48E-03 | 3.31E-09 |
| 416.98929 | 55.17  | 17.43 | 15.30 | 14.24 | 15.05 | 2.78E-13 | 1.24E-06 | 2.68E-13 | 1.06E-07 | 4.58E-02 | 9.31E-01 | 2.11E-01 |
| 417.00434 | 58.83  | 15.04 | 13.67 | 13.94 | 15.66 | 2.32E-06 | 2.73E-03 | 2.39E-02 | 4.10E-01 | 9.01E-01 | 1.42E-05 | 2.16E-04 |
| 417.03426 | 259.91 | 13.61 | 16.52 | 17.46 | 15.15 | 4.33E-44 | 3.65E-14 | 3.65E-14 | 7.17E-10 | 2.80E-04 | 1.01E-07 | 7.26E-14 |
| 417.04781 | 60.42  | 15.55 | 11.50 | 15.56 | 14.57 | 2.86E-22 | 7.38E-14 | 1.00E+00 | 7.74E-02 | 7.48E-14 | 2.50E-11 | 8.61E-02 |
| 417.05359 | 170.79 | 15.08 | 17.09 | 16.72 | 16.82 | 2.13E-04 | 3.80E-04 | 5.13E-03 | 4.11E-03 | 8.86E-01 | 9.52E-01 | 9.98E-01 |
| 417.23606 | 28.7   | 16.67 | 20.61 | 20.66 | 20.25 | 2.78E-39 | 3.65E-14 | 3.65E-14 | 3.72E-14 | 9.97E-01 | 6.19E-01 | 4.91E-01 |
| 417.28379 | 25.53  | 15.18 | 19.21 | 18.12 | 17.76 | 1.70E-25 | 3.85E-14 | 7.57E-14 | 7.08E-12 | 9.25E-03 | 3.23E-04 | 7.21E-01 |
| 417.33955 | 23.44  | 19.22 | 20.55 | 19.20 | 18.97 | 5.91E-11 | 5.16E-08 | 1.00E+00 | 6.93E-01 | 6.94E-08 | 9.41E-10 | 7.57E-01 |
| 417.73756 | 27.28  | 17.82 | 19.42 | 19.51 | 19.28 | 1.82E-18 | 1.20E-13 | 7.62E-14 | 1.45E-11 | 9.67E-01 | 9.00E-01 | 6.58E-01 |
| 417.76945 | 26.94  | 14.19 | 17.85 | 13.64 | 16.28 | 2.51E-13 | 9.66E-10 | 7.31E-01 | 1.39E-03 | 6.92E-12 | 3.50E-02 | 3.88E-05 |
| 417.79206 | 47.82  | 17.23 | 19.14 | 19.30 | 18.59 | 4.06E-36 | 3.65E-14 | 3.65E-14 | 7.45E-14 | 7.17E-01 | 2.50E-03 | 3.78E-05 |
| 417.89189 | 47.85  | 16.30 | 16.12 | 16.38 | 16.69 | 2.87E-02 | 7.50E-01 | 9.69E-01 | 1.45E-01 | 4.94E-01 | 1.51E-02 | 3.45E-01 |
| 417.95441 | 50.55  | 15.06 | 15.01 | 16.10 | 15.82 | 8.27E-10 | 9.90E-01 | 2.21E-07 | 4.54E-04 | 1.28E-07 | 2.39E-04 | 4.70E-01 |
| 417.97151 | 80.55  | 17.86 | 18.48 | 18.45 | 18.17 | 2.36E-04 | 6.19E-04 | 1.07E-03 | 2.25E-01 | 9.98E-01 | 2.44E-01 | 3.20E-01 |
| 418.09617 | 86.02  | 15.53 | 16.42 | 16.42 | 16.50 | 1.16E-05 | 3.38E-04 | 2.62E-04 | 1.02E-04 | 1.00E+00 | 9.80E-01 | 9.83E-01 |
| 418.24308 | 32.77  | 17.20 | 19.09 | 19.01 | 18.56 | 4.40E-20 | 7.26E-14 | 7.41E-14 | 1.61E-09 | 9.75E-01 | 5.53E-02 | 1.37E-01 |
| 418.26453 | 31.15  | 16.68 | 8.58  | 9.08  | 9.81  | 9.76E-82 | 3.65E-14 | 3.65E-14 | 3.65E-14 | 3.22E-01 | 4.56E-04 | 8.16E-02 |
| 418.34292 | 23.24  | 15.73 | 16.76 | 15.16 | 15.02 | 1.10E-08 | 1.48E-03 | 1.59E-01 | 6.51E-02 | 2.98E-07 | 7.52E-08 | 9.69E-01 |
| 418.65885 | 48.29  | 19.22 | 19.17 | 19.01 | 18.62 | 2.96E-03 | 9.87E-01 | 5.68E-01 | 2.51E-03 | 7.91E-01 | 1.03E-02 | 1.10E-01 |
| 418.70627 | 46.85  | 16.93 | 18.41 | 18.37 | 17.94 | 1.07E-13 | 9.44E-12 | 1.89E-11 | 6.80E-06 | 9.98E-01 | 1.18E-01 | 1.65E-01 |

|           |        |       |       |       |       |          |          |          |          |          |          |          |
|-----------|--------|-------|-------|-------|-------|----------|----------|----------|----------|----------|----------|----------|
| 418.7465  | 30.13  | 20.27 | 17.93 | 17.94 | 18.04 | 8.06E-41 | 3.65E-14 | 3.65E-14 | 3.65E-14 | 1.00E+00 | 9.07E-01 | 9.39E-01 |
| 418.75921 | 25.61  | 16.53 | 19.28 | 18.10 | 18.80 | 2.86E-29 | 3.65E-14 | 1.00E-11 | 7.16E-14 | 1.04E-06 | 1.49E-01 | 1.08E-02 |
| 418.79067 | 45.05  | 16.68 | 18.38 | 19.16 | 18.34 | 1.86E-47 | 3.65E-14 | 3.65E-14 | 3.74E-14 | 1.33E-07 | 9.91E-01 | 5.76E-08 |
| 418.79833 | 48.23  | 17.33 | 20.32 | 20.30 | 20.16 | 1.87E-33 | 3.70E-14 | 3.70E-14 | 4.56E-14 | 1.00E+00 | 9.19E-01 | 9.45E-01 |
| 418.83833 | 45.22  | 15.03 | 15.67 | 16.45 | 16.38 | 9.77E-06 | 1.61E-01 | 3.27E-05 | 1.65E-04 | 6.79E-02 | 1.33E-01 | 9.97E-01 |
| 418.89156 | 45.17  | 16.84 | 18.73 | 18.79 | 18.05 | 2.47E-23 | 7.36E-14 | 7.03E-14 | 1.04E-08 | 9.89E-01 | 4.19E-03 | 1.25E-03 |
| 418.91491 | 52.98  | 17.81 | 17.07 | 17.62 | 15.75 | 7.32E-09 | 9.50E-02 | 9.33E-01 | 1.12E-08 | 3.29E-01 | 7.88E-04 | 4.47E-07 |
| 418.93234 | 44.91  | 19.55 | 18.96 | 19.56 | 18.91 | 6.69E-03 | 6.57E-02 | 1.00E+00 | 4.56E-02 | 7.09E-02 | 9.97E-01 | 4.96E-02 |
| 418.94137 | 276.31 | 16.97 | 13.11 | 13.72 | 14.85 | 1.24E-10 | 3.40E-10 | 9.61E-08 | 1.61E-03 | 7.17E-01 | 1.92E-02 | 2.18E-01 |
| 418.96951 | 99.4   | 17.48 | 18.88 | 19.22 | 18.55 | 1.61E-13 | 4.14E-09 | 3.34E-13 | 1.62E-05 | 4.32E-01 | 4.85E-01 | 2.05E-02 |
| 419.04147 | 48.33  | 16.67 | 16.64 | 15.10 | 14.50 | 2.34E-09 | 1.00E+00 | 1.71E-04 | 2.51E-07 | 4.29E-04 | 9.23E-07 | 4.23E-01 |
| 419.08722 | 68.98  | 17.10 | 15.91 | 16.50 | 16.21 | 3.19E-04 | 1.69E-04 | 1.32E-01 | 1.13E-02 | 1.69E-01 | 7.39E-01 | 7.59E-01 |
| 419.21539 | 76.29  | 14.62 | 16.02 | 14.20 | 16.08 | 1.34E-07 | 1.01E-03 | 6.57E-01 | 8.54E-04 | 1.45E-05 | 9.99E-01 | 1.32E-05 |
| 419.24986 | 26.27  | 19.29 | 17.47 | 17.29 | 17.53 | 2.09E-27 | 7.07E-14 | 4.54E-14 | 7.42E-14 | 7.47E-01 | 9.88E-01 | 5.61E-01 |
| 419.26085 | 26.49  | 13.81 | 18.19 | 17.54 | 17.72 | 4.09E-35 | 3.65E-14 | 4.10E-14 | 3.92E-14 | 1.93E-01 | 5.00E-01 | 9.51E-01 |
| 419.31546 | 157.79 | 20.96 | 19.62 | 19.63 | 19.43 | 1.42E-06 | 9.37E-05 | 9.29E-05 | 1.15E-05 | 1.00E+00 | 9.40E-01 | 9.27E-01 |
| 419.75557 | 25.07  | 17.31 | 11.42 | 11.59 | 12.25 | 1.57E-61 | 3.65E-14 | 3.65E-14 | 3.65E-14 | 9.32E-01 | 2.93E-02 | 1.19E-01 |
| 419.76268 | 26.61  | 17.90 | 20.85 | 19.77 | 20.61 | 9.67E-32 | 3.65E-14 | 1.06E-13 | 4.16E-14 | 2.29E-05 | 7.25E-01 | 2.45E-03 |
| 419.79112 | 49.65  | 16.43 | 19.58 | 19.79 | 18.91 | 5.57E-42 | 3.65E-14 | 3.65E-14 | 5.03E-14 | 7.79E-01 | 1.88E-02 | 7.57E-04 |
| 419.94917 | 40.12  | 15.63 | 15.50 | 15.53 | 17.20 | 2.87E-04 | 9.89E-01 | 9.94E-01 | 2.04E-03 | 1.00E+00 | 1.03E-03 | 1.12E-03 |
| 420.01527 | 53.22  | 22.97 | 24.81 | 24.57 | 23.91 | 1.67E-22 | 7.03E-14 | 7.38E-14 | 2.12E-06 | 5.27E-01 | 9.84E-06 | 1.91E-03 |
| 420.16299 | 130.35 | 15.37 | 14.10 | 14.93 | 14.80 | 2.62E-07 | 4.12E-08 | 1.58E-01 | 4.39E-02 | 8.56E-04 | 1.04E-02 | 9.31E-01 |
| 420.19778 | 58.38  | 16.39 | 16.18 | 15.92 | 15.90 | 7.91E-02 | 7.48E-01 | 1.25E-01 | 1.12E-01 | 6.55E-01 | 6.03E-01 | 9.99E-01 |
| 420.25728 | 24.98  | 17.24 | 14.04 | 12.05 | 13.71 | 1.17E-28 | 2.49E-13 | 3.65E-14 | 7.72E-14 | 8.94E-06 | 8.57E-01 | 4.56E-04 |
| 420.26873 | 26.96  | 16.68 | 19.74 | 18.61 | 19.56 | 3.19E-34 | 3.65E-14 | 7.76E-14 | 3.70E-14 | 7.58E-06 | 8.58E-01 | 3.94E-01 |
| 420.31056 | 22.83  | 15.36 | 13.89 | 14.14 | 14.10 | 8.91E-06 | 2.31E-05 | 5.62E-04 | 5.99E-04 | 8.61E-01 | 9.18E-01 | 9.99E-01 |
| 420.31878 | 286.53 | 19.64 | 18.89 | 18.80 | 18.77 | 1.63E-03 | 1.93E-02 | 5.38E-03 | 5.64E-03 | 9.83E-01 | 9.69E-01 | 1.00E+00 |
| 420.5432  | 305.41 | 14.47 | 14.40 | 11.89 | 14.07 | 4.84E-12 | 9.97E-01 | 1.02E-10 | 7.06E-01 | 1.27E-09 | 8.33E-01 | 2.98E-07 |
| 420.6517  | 45.13  | 18.51 | 17.61 | 17.28 | 17.27 | 1.13E-05 | 6.20E-03 | 5.38E-05 | 8.41E-05 | 6.44E-01 | 6.36E-01 | 1.00E+00 |
| 420.65984 | 49.82  | 19.38 | 19.90 | 19.88 | 19.25 | 7.57E-04 | 3.01E-02 | 3.80E-02 | 9.08E-01 | 1.00E+00 | 6.74E-03 | 8.67E-03 |
| 420.76344 | 24.83  | 17.62 | 10.99 | 10.89 | 11.68 | 4.78E-70 | 3.65E-14 | 3.65E-14 | 3.65E-14 | 9.86E-01 | 1.17E-01 | 4.94E-02 |
| 420.77478 | 29.97  | 14.06 | 18.52 | 17.24 | 18.20 | 6.80E-30 | 3.70E-14 | 7.54E-14 | 5.05E-14 | 2.85E-03 | 8.28E-01 | 5.13E-02 |
| 420.79147 | 45.66  | 17.00 | 19.29 | 19.62 | 19.03 | 4.86E-39 | 3.65E-14 | 3.65E-14 | 4.72E-14 | 2.51E-01 | 5.04E-01 | 8.08E-03 |
| 420.88848 | 47.02  | 17.86 | 18.61 | 18.69 | 19.69 | 1.68E-11 | 6.20E-03 | 1.66E-03 | 1.15E-12 | 9.87E-01 | 6.64E-05 | 2.24E-04 |
| 420.92986 | 60.76  | 19.13 | 19.23 | 19.54 | 19.26 | 1.41E-01 | 9.41E-01 | 1.01E-01 | 8.96E-01 | 3.43E-01 | 9.99E-01 | 4.50E-01 |
| 420.96323 | 84.21  | 14.91 | 16.53 | 16.04 | 15.53 | 1.62E-05 | 8.56E-06 | 3.23E-03 | 2.51E-01 | 4.63E-01 | 2.24E-02 | 4.51E-01 |
| 420.9757  | 56.51  | 11.11 | 14.72 | 13.08 | 14.59 | 2.20E-11 | 4.46E-10 | 1.15E-03 | 4.78E-09 | 1.46E-02 | 9.95E-01 | 3.59E-02 |
| 420.9913  | 96.23  | 16.26 | 20.18 | 19.52 | 18.62 | 2.64E-29 | 3.67E-14 | 6.41E-14 | 7.85E-12 | 1.50E-01 | 1.47E-05 | 2.75E-02 |
| 421.01917 | 53.11  | 18.98 | 20.63 | 20.47 | 19.73 | 1.59E-23 | 6.67E-14 | 7.38E-14 | 2.21E-05 | 7.17E-01 | 6.71E-07 | 6.41E-05 |
| 421.03718 | 72.21  | 15.30 | 14.04 | 15.65 | 15.03 | 4.02E-06 | 2.21E-04 | 6.45E-01 | 8.16E-01 | 2.24E-06 | 1.10E-02 | 2.05E-01 |
| 421.0562  | 59.99  | 16.76 | 16.33 | 15.94 | 15.00 | 9.38E-04 | 7.47E-01 | 2.14E-01 | 4.06E-04 | 8.07E-01 | 1.68E-02 | 1.46E-01 |
| 421.07186 | 83.22  | 19.16 | 20.46 | 20.74 | 19.77 | 1.79E-06 | 2.02E-04 | 2.90E-06 | 2.20E-01 | 8.11E-01 | 1.48E-01 | 1.54E-02 |
| 421.08464 | 230.83 | 16.34 | 19.98 | 20.53 | 19.19 | 1.26E-34 | 3.74E-14 | 3.65E-14 | 7.45E-14 | 2.78E-01 | 6.14E-02 | 1.62E-04 |
| 421.09883 | 89.82  | 16.36 | 17.46 | 18.66 | 16.93 | 3.43E-18 | 2.61E-05 | 7.23E-14 | 7.88E-02 | 5.91E-06 | 1.52E-01 | 1.42E-10 |
| 421.11124 | 85.91  | 16.76 | 18.21 | 17.38 | 17.57 | 5.92E-12 | 5.97E-13 | 3.79E-03 | 1.17E-04 | 8.21E-05 | 6.26E-03 | 7.43E-01 |
| 421.27677 | 26.75  | 15.28 | 17.57 | 15.72 | 17.65 | 1.49E-28 | 6.83E-14 | 1.85E-01 | 6.78E-14 | 1.13E-13 | 9.88E-01 | 9.34E-14 |
| 421.31767 | 23.59  | 15.55 | 17.06 | 17.42 | 16.77 | 1.66E-07 | 3.94E-05 | 1.55E-07 | 2.01E-03 | 7.02E-01 | 8.34E-01 | 2.29E-01 |
| 421.32195 | 194.01 | 15.47 | 7.83  | 8.67  | 9.79  | 1.62E-33 | 3.65E-14 | 3.76E-14 | 7.47E-14 | 4.70E-01 | 6.33E-03 | 2.29E-01 |
| 421.72162 | 63.78  | 16.96 | 15.82 | 16.96 | 16.28 | 2.06E-03 | 5.06E-03 | 1.00E+00 | 2.04E-01 | 6.90E-03 | 5.85E-01 | 2.28E-01 |
| 421.75364 | 25.47  | 16.78 | 20.59 | 19.00 | 19.70 | 1.77E-34 | 3.65E-14 | 8.09E-14 | 5.78E-14 | 3.44E-08 | 6.24E-03 | 4.99E-02 |
| 421.78579 | 39.47  | 15.15 | 20.56 | 20.02 | 20.38 | 1.23E-72 | 3.65E-14 | 3.65E-14 | 3.65E-14 | 8.90E-02 | 8.67E-01 | 4.29E-01 |
| 421.86986 | 52.07  | 17.49 | 13.67 | 14.80 | 13.38 | 2.76E-16 | 5.14E-13 | 2.41E-07 | 1.15E-13 | 1.01E-01 | 9.41E-01 | 2.68E-02 |
| 421.87784 | 50.44  | 15.06 | 18.36 | 18.53 | 17.85 | 8.18E-42 | 3.65E-14 | 3.65E-14 | 3.85E-14 | 8.97E-01 | 1.39E-01 | 2.41E-02 |
| 421.93151 | 67.76  | 15.85 | 14.72 | 15.20 | 15.76 | 1.98E-02 | 2.30E-02 | 3.41E-01 | 9.96E-01 | 6.35E-01 | 6.25E-02 | 5.24E-01 |
| 421.9479  | 50.9   | 15.38 | 14.46 | 17.29 | 15.89 | 6.18E-11 | 6.78E-02 | 2.78E-06 | 5.30E-01 | 1.39E-11 | 1.89E-03 | 2.40E-03 |
| 422.0011  | 42.84  | 13.56 | 16.87 | 14.85 | 15.22 | 2.31E-12 | 2.52E-13 | 8.66E-03 | 5.54E-04 | 1.34E-05 | 9.36E-04 | 8.21E-01 |
| 422.01092 | 53.36  | 20.03 | 21.79 | 21.63 | 20.81 | 6.72E-22 | 7.27E-14 | 7.43E-14 | 1.01E-04 | 7.87E-01 | 1.46E-06 | 7.62E-05 |
| 422.02016 | 60.64  | 17.83 | 18.92 | 19.63 | 18.60 | 3.93E-18 | 3.67E-08 | 7.27E-14 | 2.62E-04 | 8.37E-04 | 3.38E-01 | 7.52E-07 |
| 422.07648 | 76.36  | 16.57 | 16.16 | 16.06 | 16.03 | 1.84E-01 | 4.51E-01 | 2.47E-01 | 2.24E-01 | 9.84E-01 | 9.68E-01 | 9.99E-01 |
| 422.08751 | 227.93 | 10.93 | 14.92 | 15.63 | 14.91 | 1.12E-32 | 5.27E-14 | 3.65E-14 | 6.10E-14 | 2.07E-01 | 1.00E+00 | 2.15E-01 |
| 422.10452 | 65.14  | 17.72 | 17.19 | 16.74 | 16.75 | 2.07E-04 | 1.53E-01 | 5.10E-04 | 1.07E-03 | 2.75E-01 | 3.31E-01 | 1.00E+00 |
| 422.1055  | 275.46 | 12.07 | 16.73 | 15.99 | 14.89 | 9.48E-21 | 7.39E-14 | 8.04E-14 | 3.79E-08 | 3.80E-01 | 1.00E-03 | 1.04E-01 |
| 422.22336 | 61.46  | 15.80 | 13.75 | 15.35 | 14.80 | 6.13E-08 | 2.79E-08 | 5.25E-01 | 2.15E-02 | 3.52E-05 | 1.80E-02 | 4.12E-01 |
| 422.25558 | 26.14  | 15.66 | 19.38 | 17.82 | 18.64 | 9.75E-31 | 3.65E-14 | 8.06E-13 | 6.78E-14 | 5.44E-07 | 5.97E-02 | 2.44E-02 |
| 422.28442 | 26.93  | 15.88 | 18.59 | 17.60 | 18.64 | 6.72E-38 | 3.65E-14 | 7.43E-14 | 3.65E-14 | 4.57E-06 | 9.94E-01 | 2.48E-06 |
| 422.32633 | 23.17  | 18.44 | 18.87 | 18.72 | 18.50 | 2.47E-01 | 2.51E-01 | 6.00E-01 | 9.93E-01 | 9.29E-01 | 4.46E-01 | 8.01E-01 |
| 422.65421 | 48.51  | 19.90 | 20.05 | 19.90 | 19.45 | 6.92E-03 | 8.00E-01 | 1.00E+00 | 4.64E-02 | 8.27E-01 | 4.48E-03 | 5.01E-02 |
| 422.74226 | 46.48  | 18.79 | 20.70 | 20.76 | 20.22 | 1.65E-22 | 7.47E-14 | 7.37E-14 | 7.87E-11 | 9.92E-01 | 9.20E-02 | 4.35E-02 |

|           |        |       |       |       |       |          |          |          |          |          |          |          |
|-----------|--------|-------|-------|-------|-------|----------|----------|----------|----------|----------|----------|----------|
| 422.76175 | 28.25  | 19.85 | 24.34 | 22.82 | 23.90 | 2.57E-70 | 3.65E-14 | 3.65E-14 | 3.65E-14 | 1.32E-13 | 8.65E-02 | 1.98E-07 |
| 422.79117 | 37.3   | 15.00 | 18.81 | 18.39 | 18.84 | 2.87E-29 | 4.54E-14 | 7.23E-14 | 4.92E-14 | 6.04E-01 | 1.00E+00 | 5.57E-01 |
| 422.86283 | 50.71  | 20.11 | 18.52 | 18.96 | 18.01 | 5.55E-13 | 2.22E-08 | 6.84E-05 | 7.50E-13 | 3.48E-01 | 2.41E-01 | 3.01E-03 |
| 422.88328 | 35.5   | 16.00 | 17.82 | 17.94 | 18.12 | 5.18E-17 | 2.38E-11 | 7.65E-13 | 1.29E-13 | 9.61E-01 | 6.67E-01 | 9.09E-01 |
| 422.92735 | 61.42  | 16.79 | 16.02 | 16.44 | 16.96 | 2.91E-05 | 5.21E-04 | 2.63E-01 | 8.30E-01 | 1.48E-01 | 4.35E-05 | 5.42E-02 |
| 423.01434 | 52.93  | 16.25 | 16.91 | 16.53 | 16.18 | 2.74E-03 | 7.01E-03 | 5.06E-01 | 9.88E-01 | 2.58E-01 | 4.51E-03 | 3.64E-01 |
| 423.08042 | 225.57 | 11.16 | 12.91 | 13.53 | 13.51 | 3.62E-07 | 1.00E-03 | 2.46E-06 | 7.12E-06 | 5.50E-01 | 6.05E-01 | 1.00E+00 |
| 423.22321 | 56.01  | 16.44 | 16.13 | 16.72 | 15.90 | 9.73E-02 | 7.82E-01 | 8.17E-01 | 3.90E-01 | 2.91E-01 | 9.17E-01 | 8.49E-02 |
| 423.2634  | 29.27  | 19.16 | 23.37 | 21.85 | 22.83 | 1.90E-65 | 3.65E-14 | 3.65E-14 | 3.65E-14 | 1.06E-13 | 2.36E-02 | 1.55E-06 |
| 423.32922 | 23.25  | 16.53 | 16.28 | 16.13 | 15.96 | 4.08E-01 | 8.75E-01 | 6.37E-01 | 3.53E-01 | 9.77E-01 | 8.11E-01 | 9.60E-01 |
| 423.73215 | 43.42  | 17.20 | 17.05 | 18.04 | 18.30 | 1.30E-04 | 9.66E-01 | 3.24E-02 | 3.41E-03 | 1.11E-02 | 1.02E-03 | 8.53E-01 |
| 423.76981 | 29.19  | 18.79 | 23.22 | 21.37 | 22.16 | 3.35E-67 | 3.65E-14 | 3.65E-14 | 3.65E-14 | 7.18E-14 | 2.21E-07 | 1.30E-04 |
| 423.78542 | 49.28  | 15.27 | 14.04 | 16.14 | 15.36 | 4.35E-10 | 1.21E-04 | 1.29E-02 | 9.90E-01 | 5.10E-11 | 9.42E-05 | 4.98E-02 |
| 423.87191 | 37.74  | 16.98 | 18.02 | 18.29 | 17.85 | 4.15E-17 | 2.68E-11 | 7.47E-14 | 6.54E-08 | 2.66E-01 | 6.54E-01 | 1.86E-02 |
| 423.91817 | 52.22  | 13.87 | 14.98 | 15.27 | 14.20 | 7.01E-05 | 4.53E-03 | 1.50E-04 | 7.51E-01 | 8.32E-01 | 1.17E-01 | 1.24E-02 |
| 423.9833  | 122.46 | 15.12 | 15.98 | 10.66 | 14.33 | 1.80E-18 | 3.87E-01 | 1.52E-13 | 4.89E-01 | 7.49E-14 | 2.28E-02 | 5.02E-09 |
| 424.00678 | 55.24  | 15.71 | 16.30 | 16.11 | 15.51 | 2.89E-03 | 3.92E-02 | 2.60E-01 | 8.15E-01 | 8.34E-01 | 4.64E-03 | 4.96E-02 |
| 424.06481 | 95.86  | 15.75 | 18.80 | 18.40 | 17.56 | 2.76E-32 | 3.65E-14 | 4.05E-14 | 1.62E-12 | 3.16E-01 | 2.63E-06 | 2.43E-03 |
| 424.10219 | 79.27  | 11.98 | 15.54 | 15.45 | 14.54 | 1.80E-20 | 7.65E-14 | 7.43E-14 | 1.34E-09 | 9.96E-01 | 5.68E-02 | 9.36E-02 |
| 424.27078 | 29.68  | 18.02 | 22.17 | 20.43 | 21.18 | 4.62E-58 | 3.65E-14 | 3.65E-14 | 3.65E-14 | 7.46E-14 | 6.42E-06 | 8.68E-04 |
| 424.34195 | 23.66  | 22.27 | 22.70 | 22.67 | 22.27 | 1.61E-01 | 3.12E-01 | 3.70E-01 | 1.00E+00 | 9.99E-01 | 3.61E-01 | 4.20E-01 |
| 424.54005 | 256.61 | 15.27 | 16.50 | 15.98 | 14.63 | 1.91E-16 | 1.55E-08 | 2.04E-03 | 8.38E-03 | 5.38E-02 | 7.38E-14 | 2.38E-09 |
| 424.65135 | 48.69  | 18.74 | 18.73 | 18.68 | 18.28 | 8.56E-02 | 1.00E+00 | 9.87E-01 | 9.77E-02 | 9.91E-01 | 1.23E-01 | 2.12E-01 |
| 424.73832 | 49.2   | 19.23 | 21.15 | 21.17 | 20.68 | 5.69E-34 | 3.65E-14 | 3.65E-14 | 7.58E-14 | 1.00E+00 | 1.28E-02 | 8.74E-03 |
| 424.75836 | 27.07  | 16.06 | 17.97 | 16.25 | 18.02 | 1.31E-11 | 7.74E-08 | 9.37E-01 | 8.08E-08 | 2.66E-06 | 9.99E-01 | 2.50E-06 |
| 424.77766 | 30.32  | 18.84 | 22.77 | 21.16 | 22.13 | 1.43E-74 | 3.65E-14 | 3.65E-14 | 3.65E-14 | 5.98E-14 | 1.72E-04 | 5.35E-09 |
| 424.83075 | 47.89  | 14.99 | 12.06 | 15.22 | 13.50 | 1.94E-13 | 8.37E-11 | 9.43E-01 | 2.78E-03 | 8.83E-12 | 5.97E-03 | 5.25E-04 |
| 424.8596  | 50.72  | 19.48 | 17.79 | 17.80 | 16.17 | 4.90E-13 | 9.76E-05 | 8.80E-05 | 1.07E-13 | 1.00E+00 | 5.20E-04 | 4.28E-04 |
| 424.8964  | 34.52  | 16.17 | 12.39 | 16.82 | 14.99 | 3.29E-21 | 7.53E-14 | 3.94E-01 | 2.98E-02 | 7.12E-14 | 7.50E-08 | 2.21E-04 |
| 424.91915 | 30.34  | 13.90 | 12.26 | 15.66 | 13.49 | 1.58E-10 | 1.95E-03 | 5.99E-04 | 8.17E-01 | 2.00E-11 | 5.07E-02 | 4.45E-05 |
| 424.92858 | 37.04  | 15.63 | 20.56 | 20.15 | 19.60 | 7.31E-82 | 3.65E-14 | 3.65E-14 | 3.65E-14 | 9.91E-02 | 1.86E-06 | 1.28E-02 |
| 425.00335 | 102.64 | 14.45 | 13.44 | 13.57 | 12.99 | 1.01E-06 | 6.05E-04 | 3.50E-03 | 4.57E-07 | 9.59E-01 | 3.47E-01 | 1.36E-01 |
| 425.0441  | 296.27 | 14.42 | 19.28 | 19.44 | 17.25 | 6.68E-68 | 3.65E-14 | 3.65E-14 | 3.67E-14 | 8.80E-01 | 7.57E-14 | 7.41E-14 |
| 425.13611 | 40.87  | 14.38 | 13.29 | 14.81 | 14.30 | 6.66E-03 | 5.70E-02 | 7.32E-01 | 9.98E-01 | 3.43E-03 | 1.20E-01 | 6.62E-01 |
| 425.25794 | 25.08  | 14.85 | 16.13 | 14.62 | 16.41 | 1.06E-07 | 1.31E-03 | 8.97E-01 | 7.49E-05 | 1.30E-04 | 8.59E-01 | 6.14E-06 |
| 425.27919 | 29.82  | 18.12 | 21.76 | 20.18 | 21.05 | 3.35E-63 | 3.65E-14 | 3.65E-14 | 3.65E-14 | 7.43E-14 | 1.15E-04 | 1.15E-06 |
| 425.34526 | 22.98  | 20.42 | 20.66 | 20.69 | 20.37 | 4.32E-01 | 7.30E-01 | 6.52E-01 | 9.95E-01 | 9.99E-01 | 6.24E-01 | 5.47E-01 |
| 425.72878 | 46.86  | 17.47 | 12.55 | 12.91 | 13.50 | 1.01E-43 | 3.65E-14 | 3.65E-14 | 3.67E-14 | 6.50E-01 | 1.82E-02 | 2.57E-01 |
| 425.74884 | 264.45 | 18.41 | 15.52 | 14.13 | 16.33 | 1.85E-31 | 7.57E-14 | 3.65E-14 | 1.20E-09 | 7.64E-05 | 5.77E-02 | 3.15E-10 |
| 425.749   | 28.93  | 16.16 | 19.81 | 20.11 | 19.53 | 4.68E-68 | 3.65E-14 | 3.65E-14 | 3.65E-14 | 3.12E-01 | 3.99E-01 | 6.89E-03 |
| 425.74907 | 120.96 | 18.38 | 16.99 | 17.06 | 17.32 | 6.06E-04 | 1.40E-03 | 2.42E-03 | 3.02E-02 | 9.98E-01 | 8.41E-01 | 9.13E-01 |
| 425.76637 | 25.74  | 15.63 | 16.34 | 14.21 | 15.51 | 2.89E-10 | 6.57E-02 | 9.20E-06 | 9.76E-01 | 5.64E-11 | 3.32E-02 | 1.79E-04 |
| 425.7822  | 25.39  | 15.87 | 19.09 | 17.16 | 18.27 | 3.66E-31 | 3.65E-14 | 5.60E-07 | 7.25E-14 | 4.57E-13 | 6.76E-03 | 5.96E-05 |
| 425.87678 | 116.82 | 12.79 | 13.75 | 9.22  | 14.16 | 2.00E-24 | 1.25E-01 | 1.29E-13 | 1.29E-02 | 7.32E-14 | 8.09E-01 | 6.36E-14 |
| 425.92307 | 48.27  | 13.52 | 14.66 | 14.10 | 14.88 | 5.61E-03 | 2.70E-02 | 4.74E-01 | 6.71E-03 | 5.29E-01 | 9.56E-01 | 2.58E-01 |
| 425.93226 | 37.51  | 13.77 | 16.97 | 16.33 | 15.67 | 1.41E-37 | 3.65E-14 | 3.72E-14 | 7.49E-14 | 1.33E-02 | 5.89E-08 | 1.45E-02 |
| 425.95527 | 40.81  | 14.03 | 14.81 | 16.89 | 14.72 | 5.59E-18 | 4.46E-02 | 7.55E-14 | 1.14E-01 | 3.59E-10 | 9.90E-01 | 1.58E-10 |
| 426.02242 | 91.28  | 17.00 | 9.72  | 11.45 | 10.42 | 4.08E-22 | 7.23E-14 | 7.82E-13 | 7.42E-14 | 8.00E-02 | 7.80E-01 | 5.09E-01 |
| 426.03195 | 85.97  | 14.07 | 20.24 | 20.20 | 18.62 | 1.91E-62 | 3.65E-14 | 3.65E-14 | 3.65E-14 | 9.99E-01 | 2.01E-06 | 2.87E-06 |
| 426.06998 | 55.18  | 16.98 | 18.22 | 17.87 | 17.97 | 1.81E-14 | 1.36E-13 | 4.73E-08 | 3.58E-09 | 9.98E-02 | 4.00E-01 | 9.09E-01 |
| 426.11125 | 217.17 | 10.37 | 14.02 | 13.53 | 13.64 | 3.97E-13 | 2.21E-11 | 4.52E-09 | 5.02E-09 | 7.74E-01 | 8.86E-01 | 9.97E-01 |
| 426.25006 | 29.16  | 13.98 | 18.72 | 19.03 | 18.16 | 1.29E-41 | 3.65E-14 | 3.65E-14 | 3.72E-14 | 8.00E-01 | 3.63E-01 | 5.77E-02 |
| 426.2507  | 122.43 | 16.68 | 15.35 | 15.85 | 15.97 | 4.22E-02 | 2.25E-02 | 2.70E-01 | 4.37E-01 | 7.15E-01 | 5.88E-01 | 9.95E-01 |
| 426.35762 | 24.93  | 23.57 | 23.84 | 23.64 | 23.25 | 1.94E-01 | 7.28E-01 | 9.94E-01 | 6.02E-01 | 8.70E-01 | 1.32E-01 | 4.67E-01 |
| 426.65073 | 47.26  | 16.53 | 16.55 | 16.28 | 15.78 | 1.26E-02 | 1.00E+00 | 7.47E-01 | 1.76E-02 | 7.15E-01 | 1.79E-02 | 2.10E-01 |
| 426.7367  | 45.96  | 17.50 | 20.40 | 20.13 | 19.84 | 1.36E-16 | 9.33E-14 | 1.53E-12 | 1.02E-09 | 8.73E-01 | 4.17E-01 | 8.50E-01 |
| 426.75634 | 44.35  | 14.30 | 18.24 | 17.62 | 17.00 | 9.90E-20 | 7.45E-14 | 1.08E-13 | 1.81E-09 | 4.32E-01 | 1.99E-02 | 4.56E-01 |
| 426.78796 | 46.96  | 14.82 | 14.50 | 15.53 | 14.19 | 6.15E-05 | 6.59E-01 | 5.00E-02 | 1.22E-01 | 2.02E-03 | 7.12E-01 | 4.03E-05 |
| 426.82592 | 46.5   | 17.84 | 20.06 | 20.21 | 20.14 | 3.46E-36 | 3.70E-14 | 3.65E-14 | 3.67E-14 | 8.44E-01 | 9.73E-01 | 9.83E-01 |
| 426.85736 | 50.23  | 17.02 | 12.02 | 12.75 | 12.42 | 2.50E-23 | 7.21E-14 | 7.56E-14 | 7.41E-14 | 4.46E-01 | 8.61E-01 | 9.12E-01 |
| 426.89954 | 20.26  | 15.43 | 17.41 | 16.74 | 16.87 | 1.51E-37 | 3.65E-14 | 6.78E-14 | 5.41E-14 | 2.49E-06 | 3.64E-04 | 7.64E-01 |
| 426.91263 | 46.31  | 15.43 | 15.48 | 13.02 | 13.88 | 3.13E-07 | 1.00E+00 | 6.09E-06 | 1.07E-02 | 7.98E-06 | 1.04E-02 | 3.34E-01 |
| 426.92335 | 43.14  | 14.58 | 18.35 | 17.97 | 17.43 | 4.83E-38 | 3.65E-14 | 3.65E-14 | 6.10E-14 | 4.48E-01 | 4.19E-03 | 1.93E-01 |
| 426.93523 | 134.02 | 11.15 | 12.35 | 15.09 | 14.42 | 1.55E-18 | 2.79E-02 | 7.44E-14 | 1.35E-11 | 1.28E-08 | 4.97E-05 | 4.43E-01 |
| 426.94559 | 38.85  | 13.74 | 14.64 | 14.31 | 15.10 | 2.85E-05 | 5.80E-03 | 1.50E-01 | 1.17E-05 | 6.34E-01 | 3.79E-01 | 3.01E-02 |
| 426.96214 | 273.69 | 10.37 | 16.20 | 16.77 | 13.82 | 2.32E-36 | 3.65E-14 | 3.65E-14 | 7.33E-12 | 6.00E-01 | 5.55E-06 | 9.34E-09 |
| 426.97122 | 264.31 | 17.73 | 19.59 | 19.92 | 18.77 | 1.86E-28 | 6.96E-14 | 3.72E-14 | 1.97E-07 | 2.68E-01 | 1.10E-04 | 1.79E-08 |
| 426.98363 | 85.67  | 15.07 | 18.35 | 18.18 | 17.03 | 1.28E-31 | 3.67E-14 | 3.74E-14 | 1.21E-11 | 9.15E-01 | 1.11E-05 | 1.48E-04 |

|           |        |       |       |       |       |          |          |          |          |          |          |          |
|-----------|--------|-------|-------|-------|-------|----------|----------|----------|----------|----------|----------|----------|
| 427.0327  | 85.44  | 15.07 | 16.89 | 16.31 | 15.73 | 1.56E-11 | 9.14E-12 | 3.56E-06 | 4.51E-02 | 8.97E-02 | 5.48E-05 | 1.05E-01 |
| 427.04407 | 143.65 | 15.32 | 17.51 | 15.44 | 15.53 | 8.81E-05 | 2.08E-04 | 9.95E-01 | 9.79E-01 | 7.59E-04 | 2.18E-03 | 9.99E-01 |
| 427.07667 | 71.66  | 16.55 | 11.66 | 11.62 | 12.60 | 1.54E-32 | 3.70E-14 | 3.67E-14 | 7.54E-14 | 1.00E+00 | 1.07E-01 | 8.01E-02 |
| 427.0948  | 197.15 | 21.35 | 22.97 | 23.23 | 23.90 | 2.36E-11 | 1.81E-05 | 3.54E-07 | 2.64E-11 | 8.76E-01 | 5.15E-02 | 2.46E-01 |
| 427.13752 | 68.9   | 14.58 | 17.82 | 16.34 | 17.39 | 2.50E-27 | 3.83E-14 | 1.16E-09 | 7.32E-14 | 9.90E-07 | 4.31E-01 | 1.29E-03 |
| 427.25833 | 27.78  | 11.94 | 15.20 | 15.22 | 14.52 | 9.78E-06 | 7.20E-05 | 5.19E-05 | 3.71E-03 | 1.00E+00 | 8.15E-01 | 7.94E-01 |
| 427.3609  | 22.97  | 21.66 | 21.86 | 21.74 | 21.34 | 2.38E-01 | 8.50E-01 | 9.85E-01 | 5.80E-01 | 9.69E-01 | 1.91E-01 | 3.95E-01 |
| 427.37799 | 287.4  | 17.37 | 15.99 | 16.73 | 16.06 | 1.39E-05 | 4.66E-05 | 1.38E-01 | 1.91E-04 | 8.43E-02 | 9.97E-01 | 1.54E-01 |
| 427.37818 | 166.57 | 17.60 | 15.11 | 15.89 | 15.72 | 2.61E-16 | 7.42E-14 | 9.74E-09 | 1.07E-09 | 3.15E-02 | 1.65E-01 | 9.31E-01 |
| 427.76402 | 26.95  | 13.76 | 18.45 | 17.25 | 18.15 | 2.35E-23 | 6.87E-14 | 7.66E-13 | 7.52E-14 | 4.21E-02 | 9.20E-01 | 2.12E-01 |
| 427.82616 | 50.03  | 15.00 | 18.68 | 18.89 | 18.23 | 5.19E-61 | 3.65E-14 | 3.65E-14 | 3.65E-14 | 6.92E-01 | 9.96E-02 | 4.47E-03 |
| 427.98405 | 83.14  | 15.06 | 15.56 | 15.46 | 14.85 | 9.35E-02 | 3.54E-01 | 5.29E-01 | 9.13E-01 | 9.91E-01 | 1.28E-01 | 2.23E-01 |
| 427.9979  | 46.51  | 14.98 | 15.41 | 15.57 | 15.83 | 4.05E-02 | 4.68E-01 | 1.79E-01 | 2.67E-02 | 9.47E-01 | 5.24E-01 | 8.36E-01 |
| 428.01207 | 56.32  | 17.95 | 17.30 | 15.89 | 16.25 | 3.59E-09 | 2.17E-01 | 1.65E-08 | 8.68E-06 | 3.26E-04 | 1.71E-02 | 7.45E-01 |
| 428.02782 | 274.56 | 16.75 | 19.13 | 19.76 | 18.77 | 6.55E-11 | 3.74E-07 | 7.69E-11 | 3.72E-05 | 4.75E-01 | 8.52E-01 | 1.21E-01 |
| 428.03621 | 299.65 | 12.99 | 19.83 | 19.66 | 16.77 | 1.34E-64 | 3.65E-14 | 3.65E-14 | 3.92E-14 | 9.46E-01 | 7.52E-14 | 7.54E-14 |
| 428.03699 | 85.16  | 13.57 | 16.43 | 17.05 | 15.35 | 1.00E-19 | 2.08E-13 | 7.47E-14 | 8.26E-06 | 3.21E-01 | 2.01E-02 | 3.99E-05 |
| 428.09861 | 191.37 | 22.03 | 24.25 | 24.60 | 24.33 | 3.03E-19 | 5.91E-13 | 7.36E-14 | 3.72E-13 | 6.14E-01 | 9.92E-01 | 8.02E-01 |
| 428.17634 | 120.52 | 17.53 | 18.62 | 18.67 | 18.19 | 5.30E-20 | 7.42E-14 | 7.36E-14 | 1.36E-06 | 9.74E-01 | 4.78E-03 | 9.94E-04 |
| 428.26696 | 28.03  | 11.93 | 16.25 | 13.63 | 16.96 | 1.32E-15 | 5.42E-11 | 2.41E-02 | 2.26E-13 | 1.68E-04 | 6.85E-01 | 1.80E-06 |
| 428.2867  | 45.45  | 15.05 | 16.29 | 16.13 | 15.83 | 5.55E-06 | 9.14E-06 | 1.27E-04 | 1.46E-02 | 9.24E-01 | 3.09E-01 | 6.67E-01 |
| 428.36355 | 23.33  | 18.33 | 18.35 | 17.95 | 18.00 | 4.29E-01 | 1.00E+00 | 5.78E-01 | 7.01E-01 | 5.75E-01 | 6.94E-01 | 9.99E-01 |
| 428.37319 | 22.89  | 22.55 | 22.14 | 22.14 | 21.62 | 1.19E-03 | 2.59E-01 | 2.36E-01 | 3.18E-04 | 1.00E+00 | 1.12E-01 | 1.16E-01 |
| 428.68779 | 46.93  | 19.14 | 19.96 | 19.83 | 19.43 | 5.54E-08 | 2.24E-07 | 1.52E-05 | 2.16E-01 | 8.06E-01 | 3.03E-03 | 4.10E-02 |
| 428.73763 | 47.75  | 15.78 | 17.71 | 17.68 | 17.34 | 2.55E-21 | 7.49E-14 | 7.58E-14 | 7.15E-12 | 9.98E-01 | 2.83E-01 | 3.70E-01 |
| 428.77882 | 30.35  | 12.77 | 17.92 | 16.72 | 16.92 | 6.36E-25 | 4.74E-14 | 7.49E-14 | 7.51E-14 | 4.80E-02 | 1.61E-01 | 9.72E-01 |
| 428.78927 | 35.06  | 12.80 | 12.60 | 15.93 | 13.71 | 4.31E-09 | 9.81E-01 | 8.95E-08 | 3.49E-01 | 3.50E-08 | 2.04E-01 | 6.57E-04 |
| 428.79348 | 283.34 | 14.71 | 14.16 | 15.83 | 14.25 | 1.29E-04 | 4.90E-01 | 2.07E-02 | 6.57E-01 | 2.29E-04 | 9.96E-01 | 8.15E-04 |
| 428.82722 | 35.17  | 17.91 | 20.00 | 20.40 | 20.03 | 4.05E-45 | 3.65E-14 | 3.65E-14 | 3.65E-14 | 4.79E-02 | 9.99E-01 | 7.95E-02 |
| 428.87236 | 52.25  | 15.17 | 14.18 | 15.68 | 15.21 | 2.01E-03 | 4.75E-02 | 5.26E-01 | 1.00E+00 | 8.50E-04 | 5.38E-02 | 6.37E-01 |
| 428.9163  | 49.44  | 14.20 | 14.82 | 14.08 | 14.78 | 6.23E-02 | 2.41E-01 | 9.86E-01 | 3.20E-01 | 1.35E-01 | 9.99E-01 | 1.91E-01 |
| 428.93842 | 267.98 | 14.78 | 16.38 | 16.56 | 14.95 | 1.45E-08 | 2.34E-05 | 1.54E-06 | 9.59E-01 | 9.54E-01 | 5.26E-04 | 5.71E-05 |
| 428.96126 | 43.11  | 18.30 | 19.90 | 20.02 | 20.21 | 1.02E-23 | 7.38E-14 | 7.38E-14 | 7.16E-14 | 9.00E-01 | 3.63E-01 | 7.66E-01 |
| 428.97679 | 55.62  | 14.07 | 17.75 | 18.87 | 17.01 | 3.55E-39 | 3.74E-14 | 3.65E-14 | 7.47E-14 | 1.74E-03 | 9.42E-02 | 7.03E-08 |
| 428.99669 | 53.51  | 16.08 | 18.25 | 17.81 | 16.23 | 4.73E-11 | 8.45E-09 | 4.99E-06 | 9.73E-01 | 5.84E-01 | 4.84E-07 | 1.16E-04 |
| 429.03404 | 88.1   | 10.42 | 18.96 | 18.19 | 16.67 | 2.06E-47 | 3.65E-14 | 3.65E-14 | 3.70E-14 | 4.13E-01 | 8.87E-05 | 1.80E-02 |
| 429.04524 | 49.76  | 16.72 | 11.15 | 11.93 | 12.76 | 1.35E-23 | 6.03E-14 | 7.27E-14 | 6.38E-12 | 4.40E-01 | 1.59E-02 | 4.03E-01 |
| 429.09034 | 263.35 | 16.49 | 15.24 | 17.65 | 16.53 | 8.62E-08 | 5.38E-03 | 1.00E-02 | 1.00E+00 | 9.16E-09 | 7.00E-03 | 2.36E-02 |
| 429.09503 | 210.32 | 15.27 | 20.90 | 14.10 | 19.28 | 2.24E-13 | 1.26E-08 | 5.58E-01 | 1.29E-04 | 2.07E-11 | 3.27E-01 | 7.13E-07 |
| 429.17937 | 117.16 | 14.78 | 14.72 | 13.69 | 14.47 | 7.90E-06 | 9.94E-01 | 1.44E-05 | 5.44E-01 | 8.48E-05 | 7.19E-01 | 6.88E-03 |
| 429.22559 | 266.32 | 15.64 | 14.74 | 15.85 | 14.50 | 2.10E-04 | 4.43E-02 | 9.31E-01 | 7.14E-03 | 9.76E-03 | 9.10E-01 | 1.28E-03 |
| 429.23908 | 46.59  | 20.64 | 19.94 | 19.81 | 19.48 | 5.23E-12 | 2.22E-05 | 2.50E-07 | 3.89E-12 | 8.24E-01 | 1.96E-02 | 1.53E-01 |
| 429.28079 | 28.84  | 15.44 | 16.48 | 14.65 | 16.32 | 3.39E-10 | 1.14E-03 | 2.13E-02 | 1.14E-02 | 3.23E-09 | 9.44E-01 | 1.56E-07 |
| 429.37516 | 24.14  | 20.69 | 20.07 | 20.12 | 19.63 | 2.23E-05 | 1.33E-02 | 2.58E-02 | 5.52E-06 | 9.95E-01 | 1.89E-01 | 1.10E-01 |
| 429.78578 | 29.8   | 13.88 | 18.02 | 16.36 | 16.79 | 3.49E-23 | 4.56E-14 | 2.01E-10 | 8.49E-13 | 6.25E-05 | 7.65E-03 | 6.67E-01 |
| 429.81221 | 45.28  | 16.42 | 12.52 | 11.85 | 12.56 | 1.84E-19 | 3.64E-13 | 7.54E-14 | 1.89E-12 | 5.26E-01 | 1.00E+00 | 4.93E-01 |
| 429.82013 | 49.97  | 15.09 | 18.78 | 18.98 | 18.08 | 4.32E-50 | 3.65E-14 | 3.65E-14 | 3.65E-14 | 8.08E-01 | 1.32E-02 | 5.86E-04 |
| 429.968   | 51.73  | 20.63 | 18.56 | 18.74 | 19.91 | 1.92E-26 | 5.41E-14 | 7.12E-14 | 1.06E-03 | 7.91E-01 | 4.02E-10 | 4.32E-08 |
| 430.00404 | 94.83  | 14.77 | 17.07 | 16.55 | 16.54 | 1.95E-11 | 5.21E-11 | 3.10E-07 | 9.85E-07 | 3.88E-01 | 3.98E-01 | 1.00E+00 |
| 430.03097 | 90.77  | 13.53 | 17.26 | 17.61 | 15.39 | 8.65E-29 | 5.76E-14 | 3.76E-14 | 1.39E-06 | 7.38E-01 | 2.24E-06 | 1.08E-08 |
| 430.043   | 85.17  | 15.79 | 17.53 | 16.93 | 16.60 | 1.32E-14 | 7.76E-14 | 1.20E-07 | 4.86E-04 | 1.81E-02 | 8.97E-05 | 3.93E-01 |
| 430.09419 | 261.81 | 15.04 | 13.22 | 18.45 | 14.49 | 4.46E-10 | 6.62E-02 | 2.81E-05 | 8.84E-01 | 2.34E-10 | 3.63E-01 | 3.57E-06 |
| 430.10306 | 205.84 | 15.89 | 17.61 | 17.32 | 17.71 | 1.18E-13 | 8.21E-11 | 4.22E-08 | 1.93E-11 | 6.65E-01 | 9.76E-01 | 4.21E-01 |
| 430.19563 | 101.23 | 16.75 | 18.27 | 18.45 | 17.46 | 6.48E-23 | 7.35E-14 | 6.85E-14 | 2.07E-04 | 6.87E-01 | 2.70E-05 | 1.25E-07 |
| 430.2435  | 40.69  | 18.34 | 17.66 | 17.98 | 17.85 | 3.01E-02 | 1.88E-02 | 3.97E-01 | 1.62E-01 | 5.30E-01 | 8.72E-01 | 9.46E-01 |
| 430.28842 | 31.29  | 15.03 | 15.94 | 14.56 | 14.89 | 3.55E-03 | 7.18E-02 | 5.70E-01 | 9.81E-01 | 1.95E-03 | 3.90E-02 | 8.35E-01 |
| 430.31579 | 23.17  | 13.73 | 14.00 | 13.37 | 12.90 | 4.35E-03 | 7.95E-01 | 6.18E-01 | 3.53E-02 | 1.66E-01 | 3.11E-03 | 4.32E-01 |
| 430.35233 | 22.86  | 13.37 | 13.49 | 12.39 | 13.10 | 5.23E-02 | 9.92E-01 | 8.82E-02 | 9.24E-01 | 5.43E-02 | 8.19E-01 | 3.72E-01 |
| 430.37954 | 22.66  | 18.50 | 16.82 | 16.99 | 16.77 | 5.79E-15 | 8.67E-12 | 4.84E-10 | 7.27E-12 | 8.86E-01 | 9.96E-01 | 7.91E-01 |
| 430.4041  | 22.42  | 14.95 | 12.76 | 13.84 | 13.78 | 3.90E-10 | 3.27E-11 | 1.34E-03 | 1.12E-03 | 3.10E-03 | 8.12E-03 | 9.98E-01 |
| 430.68374 | 45.81  | 19.75 | 20.73 | 20.60 | 20.14 | 1.78E-09 | 1.21E-08 | 6.27E-07 | 7.38E-02 | 8.59E-01 | 2.64E-03 | 2.76E-02 |
| 430.74704 | 28.98  | 19.68 | 15.68 | 15.73 | 17.13 | 1.44E-25 | 6.07E-14 | 6.16E-14 | 6.33E-10 | 9.99E-01 | 1.30E-03 | 1.91E-03 |
| 430.75902 | 26.2   | 11.46 | 17.47 | 14.34 | 15.78 | 1.60E-16 | 7.25E-14 | 6.00E-05 | 2.64E-09 | 2.28E-05 | 6.61E-02 | 1.49E-01 |
| 430.82088 | 45.53  | 14.67 | 17.69 | 18.34 | 17.75 | 9.28E-61 | 3.65E-14 | 3.65E-14 | 3.65E-14 | 1.23E-03 | 9.87E-01 | 5.49E-03 |
| 430.86195 | 238.07 | 14.34 | 16.37 | 12.42 | 16.09 | 4.34E-10 | 4.27E-03 | 7.24E-03 | 2.33E-02 | 3.67E-09 | 9.71E-01 | 9.46E-08 |
| 430.91368 | 52.28  | 19.17 | 17.81 | 17.19 | 18.11 | 3.86E-12 | 1.23E-06 | 9.33E-13 | 3.74E-04 | 8.21E-02 | 6.80E-01 | 3.64E-03 |
| 430.96262 | 47.25  | 17.04 | 17.90 | 18.67 | 18.41 | 8.05E-12 | 9.09E-04 | 1.70E-11 | 4.52E-08 | 4.35E-03 | 1.27E-01 | 6.86E-01 |
| 431.00056 | 50.38  | 11.90 | 15.28 | 15.76 | 15.06 | 9.35E-35 | 3.87E-14 | 3.65E-14 | 5.76E-14 | 3.47E-01 | 8.83E-01 | 8.77E-02 |

|           |        |       |       |       |       |          |          |          |          |          |          |          |
|-----------|--------|-------|-------|-------|-------|----------|----------|----------|----------|----------|----------|----------|
| 431.02558 | 275.21 | 16.36 | 18.53 | 19.01 | 17.99 | 3.87E-20 | 1.60E-13 | 7.47E-14 | 3.56E-08 | 2.70E-01 | 2.19E-01 | 1.47E-03 |
| 431.07254 | 203.64 | 12.89 | 13.74 | 13.70 | 13.83 | 4.39E-02 | 1.06E-01 | 1.25E-01 | 6.72E-02 | 1.00E+00 | 9.95E-01 | 9.87E-01 |
| 431.09752 | 195.24 | 14.60 | 15.75 | 15.71 | 16.87 | 3.88E-09 | 2.34E-03 | 3.19E-03 | 3.76E-10 | 9.99E-01 | 6.58E-03 | 4.09E-03 |
| 431.1193  | 83.5   | 19.09 | 18.14 | 17.70 | 17.80 | 4.47E-07 | 2.10E-03 | 1.33E-06 | 1.77E-05 | 3.57E-01 | 6.06E-01 | 9.84E-01 |
| 431.14099 | 63.65  | 17.49 | 14.54 | 14.23 | 16.49 | 3.69E-16 | 1.86E-11 | 1.76E-13 | 7.51E-02 | 8.79E-01 | 3.81E-05 | 1.09E-06 |
| 431.18689 | 28.36  | 15.22 | 17.06 | 16.03 | 17.04 | 1.55E-13 | 2.33E-11 | 6.48E-03 | 9.45E-11 | 5.05E-04 | 1.00E+00 | 8.77E-04 |
| 431.22618 | 276.18 | 16.74 | 18.53 | 19.05 | 18.18 | 2.92E-18 | 1.10E-11 | 7.58E-14 | 1.05E-07 | 1.44E-01 | 5.09E-01 | 3.28E-03 |
| 431.24913 | 30.91  | 18.67 | 16.25 | 16.37 | 17.09 | 1.48E-13 | 7.18E-12 | 4.03E-11 | 1.75E-05 | 9.86E-01 | 6.71E-02 | 1.39E-01 |
| 431.38685 | 20.46  | 17.48 | 13.09 | 15.18 | 14.71 | 7.85E-26 | 3.67E-14 | 1.26E-09 | 2.16E-12 | 9.87E-08 | 9.84E-05 | 5.76E-01 |
| 431.42666 | 276.94 | 15.78 | 17.82 | 18.28 | 17.83 | 8.74E-16 | 3.10E-10 | 8.72E-14 | 7.44E-10 | 4.22E-01 | 1.00E+00 | 4.59E-01 |
| 431.62734 | 274.81 | 14.11 | 17.18 | 17.12 | 16.54 | 1.43E-17 | 8.60E-14 | 9.56E-14 | 1.65E-09 | 9.99E-01 | 3.37E-01 | 4.14E-01 |
| 431.62762 | 91.86  | 11.26 | 17.15 | 16.61 | 16.59 | 2.97E-62 | 3.65E-14 | 3.65E-14 | 3.65E-14 | 2.31E-01 | 2.36E-01 | 1.00E+00 |
| 431.75525 | 24.56  | 18.23 | 12.43 | 13.08 | 13.79 | 1.03E-65 | 3.65E-14 | 3.65E-14 | 3.65E-14 | 5.52E-02 | 3.10E-06 | 3.46E-02 |
| 431.76695 | 27.02  | 16.40 | 19.72 | 18.63 | 19.46 | 4.04E-31 | 3.65E-14 | 7.80E-14 | 4.34E-14 | 2.84E-04 | 7.75E-01 | 1.25E-02 |
| 431.81488 | 48.3   | 15.98 | 17.23 | 17.32 | 16.43 | 1.09E-18 | 1.73E-13 | 7.47E-14 | 2.24E-02 | 9.25E-01 | 7.68E-06 | 3.30E-07 |
| 431.82777 | 93.05  | 11.41 | 12.85 | 14.38 | 12.91 | 1.24E-05 | 5.84E-02 | 2.01E-06 | 5.20E-02 | 4.60E-02 | 1.00E+00 | 7.12E-02 |
| 431.86794 | 47.17  | 16.06 | 15.35 | 15.58 | 15.78 | 2.45E-02 | 1.52E-02 | 1.72E-01 | 6.62E-01 | 7.74E-01 | 3.08E-01 | 8.47E-01 |
| 431.90897 | 52.56  | 18.39 | 18.72 | 18.66 | 18.54 | 8.73E-02 | 8.00E-02 | 2.01E-01 | 7.36E-01 | 9.72E-01 | 5.80E-01 | 8.25E-01 |
| 431.99704 | 64.09  | 15.63 | 17.52 | 17.92 | 16.92 | 5.08E-18 | 1.83E-12 | 7.66E-14 | 3.29E-06 | 3.72E-01 | 9.27E-02 | 6.46E-04 |
| 432.0262  | 299.91 | 13.54 | 16.48 | 15.15 | 13.41 | 4.13E-15 | 1.48E-12 | 1.48E-04 | 9.86E-01 | 3.61E-03 | 2.75E-12 | 1.02E-04 |
| 432.02684 | 93.91  | 10.76 | 15.07 | 13.73 | 12.20 | 9.88E-17 | 7.38E-14 | 4.75E-09 | 1.57E-02 | 2.83E-02 | 1.29E-07 | 1.07E-02 |
| 432.05159 | 89.53  | 15.75 | 19.25 | 18.78 | 17.61 | 8.33E-33 | 3.65E-14 | 3.92E-14 | 1.13E-10 | 2.84E-01 | 4.15E-08 | 1.28E-04 |
| 432.22199 | 77.63  | 20.05 | 20.33 | 20.52 | 19.11 | 3.94E-06 | 7.08E-01 | 2.71E-01 | 2.99E-03 | 8.95E-01 | 9.17E-05 | 3.55E-06 |
| 432.25777 | 25.22  | 17.37 | 15.44 | 12.61 | 13.20 | 3.65E-36 | 1.27E-07 | 3.65E-14 | 3.74E-14 | 1.29E-13 | 5.99E-09 | 3.34E-01 |
| 432.26858 | 26.76  | 15.40 | 18.36 | 17.41 | 18.48 | 8.83E-44 | 3.65E-14 | 6.49E-14 | 3.65E-14 | 8.85E-06 | 9.29E-01 | 8.33E-07 |
| 432.27988 | 24.97  | 19.94 | 15.96 | 15.70 | 17.21 | 4.25E-42 | 3.65E-14 | 3.65E-14 | 7.23E-14 | 7.79E-01 | 9.24E-05 | 1.14E-06 |
| 432.38337 | 22.6   | 11.72 | 9.29  | 12.65 | 11.90 | 3.48E-06 | 7.38E-04 | 4.43E-01 | 9.93E-01 | 2.13E-06 | 6.30E-04 | 6.60E-01 |
| 432.68152 | 45.94  | 19.23 | 20.19 | 20.06 | 19.60 | 1.83E-11 | 2.04E-10 | 3.54E-08 | 4.93E-02 | 7.74E-01 | 3.68E-04 | 9.13E-03 |
| 432.76609 | 41.52  | 18.64 | 18.09 | 18.24 | 18.13 | 1.11E-03 | 1.83E-03 | 4.24E-02 | 5.60E-03 | 7.48E-01 | 9.96E-01 | 8.76E-01 |
| 432.77505 | 40.69  | 18.05 | 20.97 | 20.68 | 20.68 | 5.50E-47 | 3.65E-14 | 3.65E-14 | 3.65E-14 | 3.61E-01 | 4.01E-01 | 1.00E+00 |
| 432.85974 | 28.5   | 16.99 | 18.25 | 18.11 | 17.69 | 2.30E-15 | 1.18E-13 | 9.88E-12 | 5.45E-05 | 7.93E-01 | 3.15E-03 | 4.51E-02 |
| 432.89566 | 45.04  | 19.48 | 21.01 | 21.13 | 20.24 | 5.25E-16 | 2.47E-12 | 1.17E-13 | 1.49E-03 | 9.46E-01 | 1.57E-03 | 1.73E-04 |
| 432.96377 | 54.11  | 17.33 | 14.23 | 14.05 | 13.87 | 4.55E-13 | 4.83E-09 | 4.03E-10 | 2.18E-10 | 9.83E-01 | 9.01E-01 | 9.87E-01 |
| 433.05001 | 255.05 | 11.35 | 13.42 | 12.74 | 13.53 | 1.38E-02 | 2.72E-02 | 2.29E-01 | 2.19E-02 | 8.03E-01 | 9.99E-01 | 7.34E-01 |
| 433.10592 | 64.04  | 18.01 | 19.32 | 19.36 | 18.54 | 1.90E-08 | 1.05E-06 | 3.64E-07 | 1.52E-01 | 9.99E-01 | 1.37E-02 | 7.84E-03 |
| 433.20254 | 25.95  | 16.88 | 18.34 | 17.11 | 18.03 | 3.91E-14 | 5.19E-12 | 6.16E-01 | 1.24E-07 | 1.33E-08 | 4.19E-01 | 5.50E-05 |
| 433.22503 | 76.31  | 16.98 | 16.65 | 17.10 | 15.19 | 2.90E-05 | 8.42E-01 | 9.89E-01 | 1.30E-04 | 6.84E-01 | 4.11E-03 | 5.61E-05 |
| 433.26588 | 25.35  | 17.20 | 12.48 | 12.12 | 12.55 | 3.13E-62 | 3.65E-14 | 3.65E-14 | 3.65E-14 | 4.65E-01 | 9.93E-01 | 3.27E-01 |
| 433.28475 | 24.96  | 18.28 | 18.51 | 18.47 | 18.78 | 2.45E-01 | 7.72E-01 | 8.52E-01 | 1.67E-01 | 9.99E-01 | 6.93E-01 | 5.90E-01 |
| 433.76721 | 48.1   | 17.52 | 18.54 | 18.75 | 17.74 | 2.21E-09 | 1.03E-05 | 5.80E-08 | 7.36E-01 | 7.67E-01 | 1.85E-03 | 3.74E-05 |
| 433.78225 | 28.24  | 16.01 | 19.74 | 18.55 | 19.45 | 2.13E-38 | 3.65E-14 | 7.18E-14 | 3.65E-14 | 2.71E-05 | 6.82E-01 | 3.57E-03 |
| 433.86467 | 42.04  | 16.07 | 15.88 | 16.05 | 16.03 | 7.22E-01 | 7.06E-01 | 9.99E-01 | 9.95E-01 | 7.93E-01 | 8.61E-01 | 1.00E+00 |
| 433.90285 | 52.05  | 16.68 | 17.59 | 17.49 | 17.36 | 4.17E-05 | 9.01E-05 | 4.89E-04 | 7.81E-03 | 9.71E-01 | 7.21E-01 | 9.24E-01 |
| 433.92825 | 50.3   | 13.98 | 14.20 | 15.64 | 15.00 | 1.14E-05 | 9.27E-01 | 1.98E-05 | 2.73E-02 | 4.73E-04 | 1.42E-01 | 2.99E-01 |
| 433.94412 | 51.3   | 18.07 | 17.76 | 18.09 | 17.58 | 6.82E-02 | 4.63E-01 | 1.00E+00 | 1.18E-01 | 4.42E-01 | 8.63E-01 | 1.14E-01 |
| 433.9841  | 304.67 | 8.44  | 16.91 | 14.54 | 12.94 | 5.91E-43 | 3.65E-14 | 3.67E-14 | 7.57E-14 | 1.72E-05 | 1.63E-12 | 9.30E-03 |
| 433.9858  | 82.12  | 16.51 | 19.38 | 19.50 | 18.59 | 1.05E-24 | 7.21E-14 | 6.21E-14 | 2.91E-11 | 9.75E-01 | 3.65E-02 | 1.02E-02 |
| 434.06136 | 171.23 | 11.98 | 14.94 | 14.39 | 15.76 | 1.04E-08 | 6.85E-06 | 3.17E-04 | 1.47E-08 | 8.03E-01 | 5.61E-01 | 1.27E-01 |
| 434.06767 | 73.3   | 17.66 | 13.72 | 13.50 | 14.27 | 1.49E-26 | 6.89E-14 | 5.07E-14 | 7.62E-14 | 9.42E-01 | 5.09E-01 | 2.10E-01 |
| 434.08327 | 77.73  | 15.65 | 16.90 | 16.05 | 17.13 | 1.15E-05 | 6.53E-04 | 5.78E-01 | 5.37E-05 | 4.84E-02 | 9.00E-01 | 7.61E-03 |
| 434.10952 | 64.92  | 14.92 | 14.61 | 14.80 | 14.68 | 6.76E-01 | 6.48E-01 | 9.68E-01 | 8.20E-01 | 8.98E-01 | 9.94E-01 | 9.75E-01 |
| 434.11785 | 281.72 | 18.22 | 19.44 | 19.72 | 18.51 | 9.42E-11 | 2.18E-06 | 2.39E-09 | 6.08E-01 | 6.18E-01 | 1.24E-03 | 7.73E-06 |
| 434.2859  | 25.5   | 16.18 | 18.57 | 17.64 | 18.67 | 2.03E-24 | 7.16E-14 | 4.06E-09 | 7.03E-14 | 5.82E-04 | 9.77E-01 | 1.67E-04 |
| 434.61902 | 282.94 | 16.30 | 17.01 | 17.22 | 16.54 | 1.61E-02 | 1.08E-01 | 1.80E-02 | 8.82E-01 | 9.18E-01 | 4.82E-01 | 1.67E-01 |
| 434.63602 | 46.85  | 18.57 | 18.42 | 18.48 | 17.91 | 1.14E-04 | 7.42E-01 | 9.36E-01 | 9.36E-05 | 9.75E-01 | 5.75E-03 | 1.24E-03 |
| 434.6802  | 46.38  | 17.63 | 18.51 | 18.42 | 18.04 | 2.14E-09 | 1.52E-08 | 3.25E-07 | 2.86E-02 | 9.25E-01 | 9.70E-03 | 5.13E-02 |
| 434.76145 | 31.84  | 16.41 | 20.74 | 19.83 | 20.21 | 7.30E-53 | 3.65E-14 | 3.65E-14 | 3.65E-14 | 6.11E-04 | 1.14E-01 | 3.89E-01 |
| 434.77233 | 47.69  | 18.03 | 20.55 | 20.55 | 20.17 | 2.13E-41 | 3.65E-14 | 3.65E-14 | 3.72E-14 | 1.00E+00 | 1.59E-01 | 1.52E-01 |
| 434.8235  | 46.3   | 13.57 | 13.33 | 14.44 | 14.01 | 4.87E-02 | 9.35E-01 | 1.46E-01 | 7.26E-01 | 4.41E-02 | 4.01E-01 | 7.53E-01 |
| 434.85711 | 30.1   | 17.31 | 17.55 | 17.71 | 17.12 | 5.59E-02 | 7.09E-01 | 2.54E-01 | 8.18E-01 | 8.80E-01 | 2.50E-01 | 4.90E-02 |
| 434.89445 | 54.71  | 17.96 | 20.42 | 20.49 | 19.78 | 2.97E-31 | 3.76E-14 | 3.67E-14 | 7.63E-14 | 9.88E-01 | 1.48E-02 | 5.01E-03 |
| 434.98827 | 75.56  | 13.65 | 15.44 | 15.10 | 15.66 | 5.18E-08 | 3.33E-06 | 2.29E-04 | 3.15E-07 | 7.63E-01 | 9.34E-01 | 4.09E-01 |
| 435.01576 | 48.22  | 16.89 | 15.27 | 13.06 | 13.52 | 6.76E-23 | 7.28E-05 | 6.67E-14 | 7.39E-14 | 6.33E-08 | 4.78E-05 | 6.32E-01 |
| 435.06338 | 176.92 | 12.93 | 14.34 | 13.48 | 14.73 | 9.09E-03 | 6.13E-02 | 7.56E-01 | 1.08E-02 | 4.43E-01 | 9.12E-01 | 1.50E-01 |
| 435.10879 | 74.61  | 15.86 | 16.56 | 15.47 | 15.37 | 7.30E-04 | 8.59E-02 | 5.69E-01 | 3.94E-01 | 2.51E-03 | 1.21E-03 | 9.88E-01 |
| 435.2635  | 26.16  | 16.12 | 19.90 | 18.01 | 19.03 | 5.66E-28 | 3.67E-14 | 3.68E-09 | 7.36E-14 | 1.45E-08 | 2.97E-02 | 6.91E-03 |
| 435.29515 | 207.43 | 16.13 | 10.09 | 12.15 | 11.65 | 3.81E-38 | 3.65E-14 | 6.87E-14 | 4.63E-14 | 1.54E-06 | 7.94E-04 | 5.80E-01 |
| 435.73266 | 28.82  | 12.15 | 16.89 | 17.31 | 15.65 | 1.32E-15 | 4.44E-12 | 1.13E-13 | 6.50E-07 | 9.11E-01 | 2.42E-01 | 5.72E-02 |

|           |        |       |       |       |       |          |          |          |          |          |          |          |
|-----------|--------|-------|-------|-------|-------|----------|----------|----------|----------|----------|----------|----------|
| 435.76737 | 39.37  | 17.47 | 21.06 | 20.39 | 20.72 | 3.28E-62 | 3.65E-14 | 3.65E-14 | 3.65E-14 | 4.74E-04 | 1.96E-01 | 2.26E-01 |
| 435.89421 | 271.48 | 15.59 | 15.41 | 16.93 | 14.89 | 3.16E-04 | 9.80E-01 | 1.83E-02 | 4.54E-01 | 7.70E-03 | 7.11E-01 | 2.02E-04 |
| 435.89487 | 160.82 | 10.64 | 13.79 | 14.25 | 12.96 | 2.73E-09 | 6.57E-07 | 7.19E-09 | 6.31E-04 | 8.62E-01 | 5.22E-01 | 1.43E-01 |
| 435.94005 | 45.32  | 16.91 | 15.60 | 15.53 | 15.91 | 2.05E-05 | 1.78E-04 | 5.98E-05 | 9.60E-03 | 9.97E-01 | 7.74E-01 | 6.45E-01 |
| 435.9891  | 52.48  | 22.33 | 23.03 | 23.34 | 22.49 | 9.15E-16 | 1.54E-07 | 1.04E-13 | 5.79E-01 | 6.07E-02 | 2.10E-04 | 9.96E-10 |
| 436.03703 | 61.34  | 17.11 | 18.36 | 19.77 | 18.52 | 8.77E-36 | 1.13E-11 | 3.65E-14 | 2.00E-13 | 2.42E-13 | 8.11E-01 | 1.35E-10 |
| 436.06158 | 272.13 | 16.25 | 17.08 | 17.58 | 16.39 | 3.41E-05 | 2.88E-02 | 6.75E-05 | 9.68E-01 | 3.72E-01 | 1.28E-01 | 1.12E-03 |
| 436.06197 | 160.35 | 10.30 | 15.78 | 14.74 | 14.11 | 1.81E-31 | 3.65E-14 | 5.83E-14 | 7.48E-14 | 6.46E-02 | 7.66E-04 | 4.43E-01 |
| 436.09155 | 40.18  | 15.59 | 18.57 | 13.94 | 13.59 | 1.10E-56 | 3.67E-14 | 7.98E-11 | 1.20E-13 | 3.65E-14 | 3.65E-14 | 4.81E-01 |
| 436.22892 | 268.13 | 14.47 | 16.68 | 17.21 | 15.44 | 8.09E-12 | 1.38E-07 | 3.52E-11 | 6.54E-02 | 5.14E-01 | 1.29E-02 | 8.35E-05 |
| 436.22915 | 162.74 | 7.71  | 15.44 | 15.11 | 13.30 | 4.67E-40 | 3.65E-14 | 3.65E-14 | 6.81E-14 | 9.27E-01 | 6.54E-04 | 5.02E-03 |
| 436.2711  | 25.8   | 16.15 | 19.65 | 18.16 | 18.98 | 1.64E-32 | 3.65E-14 | 2.90E-13 | 5.87E-14 | 1.22E-07 | 6.09E-02 | 1.01E-02 |
| 436.2819  | 27.66  | 16.78 | 13.30 | 15.25 | 14.36 | 6.04E-12 | 2.17E-12 | 3.79E-03 | 2.14E-06 | 2.03E-04 | 1.20E-01 | 2.40E-01 |
| 436.30507 | 23.12  | 15.27 | 15.63 | 14.73 | 14.06 | 1.11E-03 | 7.89E-01 | 4.90E-01 | 1.28E-02 | 1.06E-01 | 8.71E-04 | 3.45E-01 |
| 436.3961  | 154.02 | 10.54 | 14.07 | 13.67 | 13.72 | 2.04E-32 | 3.67E-14 | 4.67E-14 | 5.16E-14 | 4.88E-01 | 6.24E-01 | 9.98E-01 |
| 436.63289 | 52.06  | 19.70 | 19.69 | 19.76 | 19.13 | 1.55E-04 | 1.00E+00 | 9.78E-01 | 9.91E-04 | 9.66E-01 | 2.00E-03 | 3.19E-04 |
| 436.68261 | 48.66  | 15.45 | 14.28 | 14.71 | 14.34 | 1.86E-04 | 3.64E-04 | 4.93E-02 | 1.19E-03 | 4.54E-01 | 9.97E-01 | 6.03E-01 |
| 436.74072 | 29.72  | 11.68 | 13.30 | 16.80 | 15.75 | 8.02E-15 | 4.82E-02 | 1.50E-13 | 7.29E-09 | 7.46E-07 | 1.56E-03 | 3.79E-01 |
| 436.76385 | 44.97  | 13.95 | 13.85 | 13.77 | 14.50 | 1.25E-01 | 9.86E-01 | 9.30E-01 | 3.23E-01 | 9.94E-01 | 2.00E-01 | 1.16E-01 |
| 436.77162 | 39.86  | 17.97 | 21.79 | 20.77 | 21.33 | 1.65E-64 | 3.65E-14 | 3.65E-14 | 3.65E-14 | 4.17E-08 | 4.50E-02 | 7.82E-03 |
| 436.85671 | 51.58  | 17.93 | 19.34 | 19.43 | 19.56 | 1.00E-22 | 7.67E-14 | 7.47E-14 | 7.28E-14 | 9.52E-01 | 5.65E-01 | 8.58E-01 |
| 436.86736 | 64.94  | 13.92 | 13.81 | 13.56 | 13.46 | 6.28E-01 | 9.92E-01 | 7.80E-01 | 6.49E-01 | 9.21E-01 | 8.26E-01 | 9.95E-01 |
| 436.89219 | 57.95  | 15.64 | 17.92 | 17.98 | 17.41 | 3.66E-30 | 4.05E-14 | 3.74E-14 | 7.38E-14 | 9.89E-01 | 6.32E-02 | 2.65E-02 |
| 436.9438  | 78.41  | 13.09 | 12.91 | 14.34 | 14.83 | 9.15E-04 | 9.87E-01 | 8.43E-02 | 8.22E-03 | 4.54E-02 | 4.02E-03 | 8.07E-01 |
| 436.99285 | 52.59  | 18.16 | 18.51 | 18.98 | 17.95 | 3.41E-11 | 5.64E-02 | 5.33E-08 | 4.45E-01 | 6.14E-03 | 9.02E-04 | 1.02E-01 |
| 437.04395 | 80.49  | 16.62 | 15.33 | 14.89 | 16.31 | 7.86E-06 | 2.95E-03 | 2.19E-05 | 8.34E-01 | 6.54E-01 | 6.18E-02 | 1.81E-03 |
| 437.07635 | 96.3   | 20.23 | 15.79 | 17.89 | 16.61 | 1.18E-35 | 3.65E-14 | 7.35E-13 | 4.07E-14 | 3.91E-10 | 4.93E-02 | 3.59E-04 |
| 437.08532 | 83.58  | 14.63 | 15.66 | 15.29 | 14.94 | 1.84E-03 | 1.10E-03 | 6.91E-02 | 6.84E-01 | 5.50E-01 | 6.18E-02 | 6.04E-01 |
| 437.09792 | 284.36 | 14.15 | 16.46 | 15.30 | 15.36 | 5.53E-13 | 1.06E-13 | 1.90E-04 | 1.67E-04 | 3.31E-04 | 1.08E-03 | 9.98E-01 |
| 437.10013 | 76.95  | 9.14  | 13.54 | 7.71  | 8.18  | 1.24E-49 | 3.65E-14 | 2.78E-05 | 1.50E-02 | 3.65E-14 | 3.65E-14 | 4.52E-01 |
| 437.13355 | 266.79 | 17.80 | 18.46 | 19.44 | 19.43 | 1.80E-11 | 4.02E-02 | 1.19E-09 | 6.13E-09 | 9.00E-04 | 1.77E-03 | 1.00E+00 |
| 437.15222 | 208.04 | 7.77  | 14.65 | 13.55 | 12.63 | 1.66E-37 | 3.65E-14 | 3.67E-14 | 7.12E-14 | 8.93E-02 | 2.38E-04 | 2.20E-01 |
| 437.24304 | 32.02  | 12.13 | 11.81 | 16.22 | 14.34 | 9.63E-10 | 9.67E-01 | 7.44E-08 | 1.22E-02 | 1.90E-08 | 4.03E-03 | 5.31E-02 |
| 437.27909 | 24.38  | 16.63 | 20.36 | 18.96 | 19.88 | 8.45E-50 | 3.65E-14 | 4.05E-14 | 3.65E-14 | 3.33E-10 | 1.05E-01 | 8.88E-05 |
| 437.74872 | 264.31 | 18.47 | 14.21 | 13.06 | 15.82 | 1.62E-32 | 6.05E-14 | 3.65E-14 | 1.39E-09 | 2.21E-02 | 7.01E-04 | 7.24E-10 |
| 437.74895 | 113.73 | 18.77 | 16.33 | 17.14 | 17.85 | 1.27E-09 | 5.37E-10 | 4.11E-05 | 6.35E-02 | 1.27E-01 | 4.68E-04 | 2.29E-01 |
| 437.7624  | 49.41  | 16.89 | 18.10 | 18.45 | 17.79 | 1.23E-09 | 2.78E-06 | 8.92E-10 | 1.32E-03 | 4.81E-01 | 5.78E-01 | 3.87E-02 |
| 437.78355 | 26.49  | 16.37 | 19.62 | 17.69 | 18.44 | 1.30E-33 | 3.65E-14 | 2.15E-08 | 7.45E-14 | 8.20E-14 | 4.61E-06 | 6.78E-03 |
| 437.84992 | 50.79  | 16.88 | 18.84 | 19.07 | 18.28 | 9.22E-23 | 7.45E-14 | 6.74E-14 | 1.84E-09 | 6.87E-01 | 5.78E-02 | 1.97E-03 |
| 437.9856  | 52.56  | 19.82 | 20.35 | 20.75 | 19.80 | 2.96E-14 | 1.52E-04 | 4.39E-12 | 1.00E+00 | 9.12E-03 | 2.65E-04 | 3.17E-11 |
| 437.98719 | 247.4  | 15.75 | 15.61 | 16.15 | 15.56 | 1.07E-01 | 9.39E-01 | 3.86E-01 | 8.84E-01 | 1.56E-01 | 9.98E-01 | 1.22E-01 |
| 438.05813 | 262.1  | 13.78 | 17.48 | 16.53 | 15.29 | 2.99E-25 | 4.03E-14 | 7.64E-14 | 2.43E-05 | 1.71E-02 | 1.49E-09 | 1.11E-03 |
| 438.06494 | 61.22  | 17.64 | 15.11 | 17.53 | 16.73 | 1.48E-11 | 1.05E-10 | 9.89E-01 | 6.32E-02 | 1.65E-09 | 1.64E-04 | 1.44E-01 |
| 438.13706 | 91.53  | 15.53 | 18.08 | 18.09 | 17.54 | 1.73E-10 | 1.02E-08 | 6.58E-09 | 1.54E-05 | 1.00E+00 | 5.89E-01 | 5.70E-01 |
| 438.25068 | 126.07 | 17.52 | 15.77 | 16.16 | 16.80 | 3.00E-05 | 2.65E-05 | 1.68E-03 | 2.44E-01 | 7.28E-01 | 4.48E-02 | 3.58E-01 |
| 438.25083 | 28.91  | 15.25 | 18.96 | 19.48 | 19.08 | 2.05E-46 | 3.65E-14 | 3.65E-14 | 3.65E-14 | 1.88E-01 | 9.69E-01 | 4.37E-01 |
| 438.28711 | 26.52  | 14.67 | 18.33 | 14.93 | 16.29 | 2.30E-12 | 1.58E-11 | 9.55E-01 | 8.71E-03 | 8.28E-10 | 7.19E-04 | 4.44E-02 |
| 438.2978  | 26.62  | 20.64 | 20.42 | 20.22 | 19.86 | 2.65E-05 | 4.84E-01 | 3.28E-02 | 9.74E-06 | 5.87E-01 | 4.01E-03 | 1.20E-01 |
| 438.32125 | 23.41  | 17.52 | 18.70 | 18.04 | 17.61 | 3.87E-05 | 4.77E-05 | 1.76E-01 | 9.88E-01 | 6.46E-02 | 4.96E-04 | 3.76E-01 |
| 438.62997 | 49.38  | 19.60 | 19.59 | 19.65 | 18.95 | 6.37E-05 | 1.00E+00 | 9.86E-01 | 4.51E-04 | 9.80E-01 | 8.84E-01 | 1.77E-04 |
| 438.70624 | 114.06 | 13.00 | 14.67 | 12.75 | 14.55 | 4.82E-06 | 1.04E-03 | 9.44E-01 | 3.81E-03 | 1.78E-04 | 9.94E-01 | 7.53E-04 |
| 438.71592 | 45.88  | 19.35 | 20.80 | 20.66 | 20.34 | 1.30E-22 | 7.01E-14 | 7.55E-14 | 1.92E-10 | 7.27E-01 | 1.01E-02 | 1.37E-01 |
| 438.75686 | 126.73 | 17.66 | 15.82 | 16.13 | 15.60 | 8.34E-08 | 5.12E-06 | 1.79E-04 | 5.36E-07 | 8.41E-01 | 9.39E-01 | 5.07E-01 |
| 438.76863 | 46.03  | 15.51 | 16.08 | 16.17 | 15.32 | 1.06E-02 | 1.96E-01 | 9.73E-02 | 9.22E-01 | 9.91E-01 | 6.42E-02 | 2.79E-02 |
| 438.79236 | 33.03  | 13.71 | 16.31 | 13.52 | 13.83 | 2.92E-06 | 3.85E-05 | 9.86E-01 | 9.97E-01 | 1.40E-05 | 2.60E-04 | 9.52E-01 |
| 438.83683 | 50.85  | 18.89 | 12.96 | 13.90 | 13.21 | 3.17E-30 | 3.79E-14 | 7.15E-14 | 4.94E-14 | 2.42E-01 | 9.61E-01 | 5.43E-01 |
| 438.85594 | 49.71  | 15.56 | 17.58 | 17.85 | 17.91 | 4.52E-23 | 8.05E-14 | 7.34E-14 | 7.43E-14 | 6.80E-01 | 5.53E-01 | 9.95E-01 |
| 438.90463 | 44.3   | 14.82 | 14.29 | 15.31 | 14.27 | 2.65E-02 | 4.98E-01 | 5.58E-01 | 4.94E-01 | 4.40E-02 | 1.00E+00 | 4.68E-02 |
| 438.98758 | 56.38  | 15.75 | 14.78 | 15.01 | 13.92 | 4.63E-06 | 1.84E-02 | 1.04E-01 | 8.32E-07 | 9.10E-01 | 6.43E-02 | 9.65E-03 |
| 439.10053 | 305.26 | 15.63 | 18.87 | 18.04 | 16.56 | 3.03E-29 | 3.67E-14 | 7.53E-14 | 2.50E-03 | 8.95E-03 | 8.76E-14 | 5.73E-07 |
| 439.1162  | 101    | 18.19 | 14.71 | 15.11 | 15.44 | 2.72E-36 | 3.65E-14 | 3.67E-14 | 5.78E-14 | 3.71E-01 | 2.60E-02 | 5.80E-01 |
| 439.12948 | 82.12  | 13.55 | 15.15 | 14.90 | 14.55 | 3.96E-03 | 3.76E-03 | 1.93E-02 | 1.55E-01 | 9.52E-01 | 6.18E-01 | 8.93E-01 |
| 439.14043 | 93.78  | 9.95  | 13.63 | 12.12 | 12.58 | 3.27E-07 | 1.22E-07 | 3.52E-03 | 3.99E-04 | 9.42E-02 | 4.01E-01 | 8.99E-01 |
| 439.25838 | 29.33  | 14.10 | 17.93 | 18.33 | 17.15 | 5.60E-23 | 7.54E-14 | 6.85E-14 | 1.72E-11 | 7.67E-01 | 2.61E-01 | 2.87E-02 |
| 439.30122 | 27.1   | 18.36 | 17.88 | 17.70 | 17.59 | 4.21E-06 | 9.01E-03 | 1.09E-04 | 8.07E-06 | 6.75E-01 | 2.72E-01 | 8.86E-01 |
| 439.32395 | 23.3   | 15.18 | 15.58 | 14.44 | 14.07 | 1.39E-03 | 7.35E-01 | 2.43E-01 | 3.45E-02 | 2.74E-02 | 2.11E-03 | 8.04E-01 |
| 439.7619  | 39.72  | 15.78 | 17.82 | 17.70 | 18.12 | 1.46E-18 | 3.23E-13 | 3.58E-12 | 7.39E-14 | 9.62E-01 | 6.85E-01 | 3.85E-01 |
| 439.84729 | 49.84  | 15.72 | 18.36 | 18.64 | 17.79 | 2.50E-41 | 3.65E-14 | 3.65E-14 | 6.16E-14 | 4.63E-01 | 1.87E-02 | 1.01E-04 |

|           |        |       |       |       |       |          |          |          |          |          |          |          |
|-----------|--------|-------|-------|-------|-------|----------|----------|----------|----------|----------|----------|----------|
| 439.93664 | 50.57  | 11.40 | 13.30 | 14.37 | 13.21 | 3.43E-07 | 1.31E-03 | 7.71E-08 | 3.55E-03 | 1.70E-01 | 9.98E-01 | 1.30E-01 |
| 439.98206 | 52.66  | 15.66 | 14.51 | 15.51 | 13.87 | 1.44E-06 | 6.51E-03 | 9.69E-01 | 7.31E-06 | 3.08E-02 | 3.08E-01 | 7.95E-05 |
| 440.08828 | 298.52 | 14.02 | 13.37 | 14.71 | 13.58 | 5.45E-03 | 3.39E-01 | 2.68E-01 | 6.96E-01 | 4.51E-03 | 9.53E-01 | 2.99E-02 |
| 440.10422 | 307.25 | 12.87 | 15.33 | 13.47 | 11.98 | 8.94E-15 | 7.99E-10 | 3.40E-01 | 8.91E-02 | 8.14E-06 | 8.27E-14 | 7.89E-04 |
| 440.26618 | 28.94  | 14.90 | 15.53 | 16.58 | 15.89 | 1.14E-02 | 5.99E-01 | 5.26E-03 | 2.32E-01 | 1.83E-01 | 9.10E-01 | 5.62E-01 |
| 440.33594 | 23.77  | 20.12 | 21.19 | 20.54 | 20.26 | 1.51E-05 | 1.08E-05 | 2.06E-01 | 9.19E-01 | 2.18E-02 | 4.79E-04 | 6.12E-01 |
| 440.37315 | 22.71  | 16.60 | 13.30 | 14.58 | 15.39 | 3.13E-15 | 7.51E-14 | 4.62E-07 | 8.69E-03 | 4.41E-03 | 1.05E-06 | 1.49E-01 |
| 440.62739 | 47.56  | 18.80 | 18.57 | 18.66 | 18.05 | 9.87E-07 | 3.13E-01 | 7.18E-01 | 4.70E-07 | 9.09E-01 | 1.26E-03 | 8.41E-05 |
| 440.71324 | 45.83  | 19.57 | 21.19 | 21.07 | 20.67 | 7.56E-24 | 6.47E-14 | 7.39E-14 | 9.41E-11 | 8.78E-01 | 7.52E-03 | 5.71E-02 |
| 440.72529 | 48.9   | 15.29 | 14.88 | 15.50 | 16.36 | 1.16E-01 | 8.94E-01 | 9.83E-01 | 2.79E-01 | 7.24E-01 | 7.88E-02 | 4.95E-01 |
| 440.83412 | 50.07  | 18.50 | 13.06 | 13.46 | 14.00 | 1.19E-57 | 3.65E-14 | 3.65E-14 | 3.65E-14 | 4.74E-01 | 6.97E-03 | 2.38E-01 |
| 440.91967 | 25.98  | 12.57 | 15.52 | 15.26 | 14.77 | 3.03E-24 | 6.41E-14 | 7.59E-14 | 9.01E-13 | 7.97E-01 | 5.01E-02 | 3.18E-01 |
| 441.04596 | 53.29  | 16.17 | 17.41 | 17.87 | 17.51 | 4.91E-16 | 5.38E-09 | 7.36E-14 | 7.75E-10 | 9.19E-02 | 9.60E-01 | 2.83E-01 |
| 441.06656 | 221.97 | 9.80  | 16.54 | 17.58 | 16.06 | 3.26E-57 | 3.65E-14 | 3.65E-14 | 3.65E-14 | 4.10E-02 | 6.29E-01 | 1.04E-03 |
| 441.0692  | 68.4   | 17.12 | 14.80 | 15.39 | 15.40 | 3.09E-11 | 4.40E-11 | 8.11E-07 | 2.38E-06 | 2.76E-01 | 2.90E-01 | 1.00E+00 |
| 441.17633 | 89.86  | 21.67 | 22.46 | 22.38 | 21.69 | 1.33E-06 | 9.20E-05 | 4.67E-04 | 1.00E+00 | 9.74E-01 | 3.86E-04 | 1.64E-03 |
| 441.29714 | 52.71  | 19.17 | 17.91 | 18.11 | 17.94 | 3.24E-49 | 3.65E-14 | 3.65E-14 | 3.65E-14 | 3.91E-02 | 9.87E-01 | 1.07E-01 |
| 441.34029 | 23.4   | 18.19 | 19.02 | 18.37 | 18.13 | 1.28E-04 | 4.46E-04 | 8.18E-01 | 9.90E-01 | 1.21E-02 | 3.30E-04 | 6.73E-01 |
| 441.56818 | 225.27 | 10.35 | 14.46 | 14.33 | 13.82 | 1.19E-26 | 5.70E-14 | 6.36E-14 | 7.54E-14 | 9.85E-01 | 3.59E-01 | 5.57E-01 |
| 441.73738 | 56.82  | 15.02 | 16.07 | 16.01 | 16.21 | 8.98E-04 | 6.75E-03 | 1.12E-02 | 2.12E-03 | 9.98E-01 | 9.77E-01 | 9.34E-01 |
| 441.85066 | 116.82 | 12.69 | 15.33 | 10.06 | 15.41 | 2.02E-33 | 1.14E-09 | 1.11E-09 | 1.07E-09 | 3.65E-14 | 9.98E-01 | 3.67E-14 |
| 441.92242 | 82.99  | 15.28 | 20.26 | 20.01 | 18.50 | 5.14E-53 | 3.65E-14 | 3.65E-14 | 3.92E-14 | 7.98E-01 | 9.32E-09 | 7.34E-07 |
| 441.93492 | 53.05  | 20.27 | 19.22 | 19.04 | 18.62 | 2.46E-14 | 6.62E-07 | 4.26E-09 | 1.16E-13 | 8.17E-01 | 1.95E-02 | 1.56E-01 |
| 441.97203 | 261.41 | 19.33 | 20.23 | 20.89 | 19.56 | 7.37E-12 | 2.28E-04 | 2.27E-11 | 7.33E-01 | 1.53E-02 | 1.74E-02 | 6.92E-08 |
| 441.99704 | 54.17  | 22.32 | 24.07 | 23.79 | 22.97 | 8.54E-16 | 9.83E-14 | 5.82E-11 | 1.25E-02 | 5.61E-01 | 6.67E-06 | 1.15E-03 |
| 442.00928 | 97.74  | 15.95 | 17.32 | 16.42 | 16.48 | 2.61E-07 | 4.14E-08 | 1.56E-01 | 1.04E-01 | 8.75E-04 | 3.45E-03 | 9.94E-01 |
| 442.03589 | 87.9   | 16.08 | 19.34 | 19.49 | 18.25 | 1.08E-43 | 3.65E-14 | 3.65E-14 | 7.47E-14 | 9.10E-01 | 1.11E-05 | 4.01E-07 |
| 442.04279 | 56.59  | 15.68 | 16.44 | 17.09 | 16.66 | 1.05E-09 | 1.54E-03 | 2.68E-10 | 3.01E-05 | 1.19E-02 | 7.27E-01 | 2.02E-01 |
| 442.05329 | 60.42  | 16.20 | 14.62 | 15.41 | 14.56 | 3.48E-03 | 8.96E-03 | 3.71E-01 | 7.71E-03 | 4.13E-01 | 9.99E-01 | 3.62E-01 |
| 442.12595 | 73.29  | 16.87 | 17.12 | 17.47 | 16.16 | 5.91E-04 | 8.36E-01 | 1.79E-01 | 9.67E-02 | 6.61E-01 | 1.40E-02 | 2.40E-04 |
| 442.17978 | 85.64  | 18.60 | 19.36 | 18.98 | 18.29 | 2.87E-05 | 2.58E-03 | 2.63E-01 | 5.04E-01 | 3.25E-01 | 2.59E-05 | 1.21E-02 |
| 442.35253 | 23.62  | 21.54 | 22.33 | 21.61 | 21.43 | 1.35E-03 | 5.26E-03 | 9.90E-01 | 9.73E-01 | 1.72E-02 | 2.38E-03 | 8.93E-01 |
| 442.62517 | 46.94  | 17.13 | 16.55 | 16.60 | 15.96 | 6.63E-08 | 8.49E-03 | 1.78E-02 | 7.22E-09 | 9.94E-01 | 1.05E-02 | 4.20E-03 |
| 442.71125 | 45.89  | 18.68 | 20.19 | 20.08 | 19.70 | 3.74E-30 | 3.70E-14 | 4.19E-14 | 1.76E-13 | 8.11E-01 | 8.38E-04 | 1.44E-02 |
| 442.72248 | 48.75  | 16.60 | 16.10 | 15.86 | 16.39 | 1.48E-01 | 4.54E-01 | 1.24E-01 | 9.33E-01 | 8.99E-01 | 8.48E-01 | 4.40E-01 |
| 442.76416 | 46.51  | 14.92 | 16.28 | 16.65 | 15.66 | 1.67E-12 | 5.08E-08 | 2.99E-12 | 9.31E-03 | 3.87E-01 | 5.10E-02 | 2.73E-04 |
| 442.80024 | 46.55  | 18.11 | 20.09 | 20.25 | 20.09 | 6.90E-51 | 3.65E-14 | 3.65E-14 | 3.65E-14 | 6.13E-01 | 1.00E+00 | 6.31E-01 |
| 442.85375 | 21     | 16.18 | 14.06 | 15.40 | 15.27 | 3.89E-09 | 4.27E-10 | 5.78E-02 | 2.34E-02 | 1.91E-04 | 1.58E-03 | 9.76E-01 |
| 442.89388 | 44.89  | 14.85 | 14.68 | 14.71 | 14.45 | 5.27E-01 | 9.13E-01 | 9.49E-01 | 4.38E-01 | 9.99E-01 | 8.37E-01 | 7.74E-01 |
| 442.92765 | 57.35  | 18.91 | 20.27 | 20.04 | 19.61 | 1.36E-09 | 3.01E-09 | 6.34E-07 | 6.84E-03 | 7.27E-01 | 1.68E-02 | 1.94E-01 |
| 442.9392  | 51.17  | 15.96 | 14.81 | 12.91 | 13.59 | 4.65E-14 | 1.34E-02 | 1.86E-13 | 2.30E-08 | 8.43E-06 | 1.31E-02 | 3.02E-01 |
| 442.96024 | 87.02  | 13.61 | 14.64 | 15.56 | 14.81 | 1.36E-07 | 7.85E-03 | 2.20E-08 | 1.75E-03 | 2.87E-02 | 9.57E-01 | 1.22E-01 |
| 442.97334 | 116.22 | 11.88 | 13.35 | 10.72 | 10.83 | 7.16E-04 | 1.33E-01 | 3.16E-01 | 4.34E-01 | 1.12E-03 | 2.96E-03 | 9.99E-01 |
| 442.97541 | 259.5  | 15.08 | 14.60 | 15.39 | 13.62 | 1.64E-05 | 5.21E-01 | 8.00E-01 | 3.20E-04 | 1.23E-01 | 3.77E-02 | 1.22E-05 |
| 443.00034 | 58.06  | 17.99 | 19.87 | 19.58 | 18.73 | 7.73E-16 | 9.48E-14 | 3.58E-11 | 6.37E-03 | 5.91E-01 | 1.48E-05 | 1.86E-03 |
| 443.03791 | 88.01  | 10.48 | 14.91 | 14.75 | 13.78 | 5.95E-18 | 7.76E-14 | 8.64E-14 | 5.68E-09 | 9.90E-01 | 1.52E-01 | 2.62E-01 |
| 443.03846 | 252.22 | 15.39 | 16.80 | 16.36 | 15.64 | 1.12E-03 | 1.45E-03 | 5.00E-02 | 9.15E-01 | 6.74E-01 | 2.25E-02 | 2.73E-01 |
| 443.06269 | 82.32  | 18.00 | 20.22 | 19.83 | 19.48 | 3.25E-15 | 9.09E-14 | 1.17E-10 | 5.63E-07 | 4.51E-01 | 3.73E-02 | 5.78E-01 |
| 443.07823 | 59.15  | 16.68 | 16.25 | 16.88 | 16.87 | 1.99E-01 | 5.25E-01 | 9.20E-01 | 9.39E-01 | 2.13E-01 | 2.56E-01 | 1.00E+00 |
| 443.18093 | 86.5   | 16.07 | 15.32 | 14.75 | 13.79 | 4.90E-11 | 5.92E-02 | 7.59E-05 | 1.29E-11 | 2.52E-01 | 1.48E-05 | 1.28E-02 |
| 443.23796 | 72.3   | 14.40 | 15.02 | 14.95 | 14.26 | 9.88E-02 | 3.00E-01 | 3.93E-01 | 9.83E-01 | 9.98E-01 | 1.87E-01 | 2.54E-01 |
| 443.26773 | 22.07  | 15.38 | 15.31 | 12.92 | 12.66 | 1.11E-05 | 1.00E+00 | 1.45E-03 | 5.60E-04 | 3.22E-03 | 1.29E-03 | 9.82E-01 |
| 443.35582 | 23.25  | 19.65 | 20.25 | 19.51 | 19.48 | 2.50E-03 | 3.16E-02 | 9.16E-01 | 8.75E-01 | 5.75E-03 | 5.45E-03 | 9.99E-01 |
| 443.56907 | 96.88  | 13.22 | 16.39 | 16.72 | 15.87 | 1.68E-32 | 3.94E-14 | 3.65E-14 | 7.36E-14 | 6.07E-01 | 2.63E-01 | 1.38E-02 |
| 443.75804 | 27.42  | 16.81 | 18.95 | 18.20 | 19.48 | 1.75E-16 | 2.31E-11 | 1.47E-05 | 7.48E-14 | 6.30E-02 | 3.08E-01 | 2.37E-04 |
| 443.79819 | 50.1   | 15.67 | 18.09 | 18.29 | 17.61 | 8.75E-31 | 4.32E-14 | 3.67E-14 | 7.52E-14 | 7.62E-01 | 1.39E-01 | 1.07E-02 |
| 443.91875 | 83.62  | 13.55 | 15.59 | 15.45 | 14.38 | 6.65E-05 | 2.31E-04 | 5.84E-04 | 3.50E-01 | 9.93E-01 | 8.86E-02 | 1.51E-01 |
| 443.93154 | 47.75  | 16.54 | 17.25 | 16.43 | 16.36 | 1.62E-01 | 3.34E-01 | 9.94E-01 | 9.72E-01 | 2.31E-01 | 1.86E-01 | 9.98E-01 |
| 443.97162 | 45.06  | 14.98 | 15.94 | 16.60 | 16.20 | 5.77E-07 | 5.29E-03 | 2.72E-07 | 2.95E-04 | 1.23E-01 | 8.32E-01 | 5.61E-01 |
| 443.99285 | 53.49  | 19.24 | 21.04 | 20.79 | 20.01 | 6.52E-18 | 7.48E-14 | 6.83E-13 | 1.21E-03 | 6.03E-01 | 7.71E-06 | 1.03E-03 |
| 444.0144  | 111.07 | 13.70 | 14.80 | 15.29 | 13.90 | 7.42E-02 | 3.71E-01 | 8.64E-02 | 9.92E-01 | 8.92E-01 | 5.92E-01 | 2.06E-01 |
| 444.06366 | 73.23  | 15.63 | 13.57 | 15.86 | 13.55 | 1.59E-12 | 3.37E-07 | 9.14E-01 | 5.36E-07 | 2.48E-08 | 1.00E+00 | 4.22E-08 |
| 444.21692 | 29.97  | 13.47 | 11.04 | 16.56 | 12.77 | 3.61E-23 | 2.04E-06 | 7.42E-10 | 4.53E-01 | 4.30E-14 | 2.79E-03 | 1.37E-12 |
| 444.26071 | 26.69  | 14.71 | 17.87 | 16.30 | 18.22 | 3.65E-19 | 8.43E-14 | 1.14E-04 | 7.47E-14 | 2.67E-04 | 8.14E-01 | 8.87E-06 |
| 444.31015 | 22.92  | 14.80 | 14.97 | 13.87 | 13.43 | 1.30E-04 | 9.67E-01 | 5.53E-02 | 2.20E-03 | 2.01E-02 | 6.54E-04 | 6.81E-01 |
| 444.35866 | 23.32  | 16.25 | 16.30 | 15.23 | 15.85 | 2.10E-04 | 9.98E-01 | 6.04E-04 | 4.40E-01 | 5.32E-04 | 3.75E-01 | 1.10E-01 |
| 444.36807 | 23.17  | 19.71 | 19.77 | 19.19 | 18.93 | 2.51E-04 | 9.91E-01 | 6.38E-02 | 2.40E-03 | 3.71E-02 | 1.30E-03 | 6.63E-01 |
| 444.57728 | 79.8   | 13.54 | 14.29 | 15.35 | 14.87 | 2.54E-02 | 6.14E-01 | 1.72E-02 | 1.55E-01 | 3.35E-01 | 8.12E-01 | 8.78E-01 |

|           |        |       |       |       |       |          |          |          |          |          |          |          |
|-----------|--------|-------|-------|-------|-------|----------|----------|----------|----------|----------|----------|----------|
| 444.66459 | 46.89  | 18.02 | 18.84 | 18.88 | 18.24 | 5.77E-12 | 1.16E-08 | 1.52E-09 | 3.71E-01 | 9.91E-01 | 1.23E-04 | 3.02E-05 |
| 444.67354 | 52.82  | 15.87 | 15.77 | 15.05 | 15.90 | 1.48E-01 | 9.94E-01 | 1.85E-01 | 1.00E+00 | 3.24E-01 | 9.90E-01 | 2.01E-01 |
| 444.71246 | 46.61  | 17.15 | 18.20 | 18.11 | 17.96 | 2.90E-11 | 5.01E-10 | 1.03E-08 | 3.88E-06 | 9.37E-01 | 4.52E-01 | 7.93E-01 |
| 444.76424 | 36.85  | 16.91 | 16.05 | 16.12 | 17.29 | 3.90E-03 | 1.10E-01 | 1.58E-01 | 7.54E-01 | 9.98E-01 | 1.17E-02 | 1.85E-02 |
| 444.78538 | 27.85  | 15.60 | 18.52 | 16.58 | 18.26 | 2.07E-27 | 4.56E-14 | 6.68E-04 | 7.34E-14 | 1.23E-11 | 7.70E-01 | 9.61E-09 |
| 444.80124 | 37.89  | 18.35 | 19.87 | 19.99 | 19.83 | 3.29E-41 | 3.65E-14 | 3.65E-14 | 3.65E-14 | 7.00E-01 | 9.81E-01 | 4.73E-01 |
| 444.89276 | 41.92  | 13.66 | 15.51 | 14.15 | 14.76 | 5.78E-05 | 3.17E-05 | 6.06E-01 | 3.60E-02 | 5.04E-03 | 2.88E-01 | 4.47E-01 |
| 444.92556 | 52.89  | 17.81 | 18.55 | 18.47 | 18.27 | 9.23E-05 | 1.44E-04 | 8.14E-04 | 5.11E-02 | 9.67E-01 | 3.98E-01 | 6.71E-01 |
| 444.96874 | 52.95  | 16.16 | 16.91 | 17.79 | 15.29 | 6.43E-11 | 1.02E-01 | 6.44E-06 | 5.05E-02 | 4.75E-02 | 3.02E-05 | 3.95E-11 |
| 445.01157 | 95.29  | 14.63 | 15.68 | 14.90 | 15.13 | 6.52E-03 | 3.34E-03 | 8.09E-01 | 3.64E-01 | 5.71E-02 | 3.22E-01 | 8.76E-01 |
| 445.0378  | 80.96  | 15.44 | 17.99 | 18.11 | 16.57 | 1.27E-30 | 4.21E-14 | 3.72E-14 | 5.26E-06 | 9.50E-01 | 2.10E-08 | 8.60E-10 |
| 445.11988 | 23.62  | 17.85 | 16.89 | 17.31 | 17.70 | 3.65E-03 | 3.12E-03 | 1.97E-01 | 9.52E-01 | 4.40E-01 | 2.88E-02 | 5.29E-01 |
| 445.12003 | 149.7  | 16.43 | 14.22 | 14.53 | 14.86 | 5.12E-20 | 7.49E-14 | 8.90E-14 | 5.13E-10 | 5.05E-01 | 3.50E-02 | 5.08E-01 |
| 445.28701 | 27.46  | 15.51 | 17.38 | 15.65 | 17.15 | 3.46E-11 | 2.10E-08 | 9.63E-01 | 2.07E-06 | 5.06E-07 | 8.90E-01 | 2.93E-05 |
| 445.37066 | 23.18  | 17.74 | 17.34 | 16.66 | 16.87 | 3.31E-07 | 1.84E-01 | 4.96E-07 | 1.44E-04 | 4.53E-03 | 1.08E-01 | 7.38E-01 |
| 445.5636  | 257.8  | 14.82 | 17.62 | 16.27 | 14.85 | 4.35E-25 | 5.76E-14 | 1.61E-07 | 9.99E-01 | 2.88E-06 | 7.18E-14 | 1.45E-06 |
| 445.59693 | 137.93 | 14.81 | 14.58 | 12.89 | 12.69 | 6.39E-13 | 8.84E-01 | 2.21E-08 | 2.52E-09 | 2.36E-06 | 2.97E-07 | 9.33E-01 |
| 445.78269 | 26.27  | 15.35 | 17.20 | 16.19 | 17.62 | 8.37E-16 | 1.05E-10 | 6.86E-03 | 9.61E-14 | 1.21E-03 | 4.24E-01 | 2.55E-06 |
| 445.79383 | 43.18  | 16.61 | 18.96 | 18.44 | 18.67 | 3.06E-26 | 4.50E-14 | 7.43E-14 | 7.48E-14 | 6.52E-02 | 5.25E-01 | 7.20E-01 |
| 445.95008 | 43.02  | 13.89 | 15.64 | 14.77 | 16.45 | 2.25E-10 | 1.12E-05 | 6.32E-02 | 1.94E-10 | 8.68E-02 | 1.41E-01 | 7.16E-05 |
| 445.9885  | 52.59  | 14.83 | 14.80 | 14.37 | 14.14 | 1.23E-01 | 1.00E+00 | 4.82E-01 | 1.70E-01 | 5.59E-01 | 2.21E-01 | 9.11E-01 |
| 446.0064  | 91.83  | 15.51 | 17.07 | 17.21 | 16.61 | 4.93E-19 | 8.43E-14 | 7.38E-14 | 7.62E-08 | 8.67E-01 | 8.40E-02 | 9.90E-03 |
| 446.01606 | 94.53  | 14.31 | 15.12 | 13.44 | 14.24 | 1.91E-08 | 7.67E-03 | 2.61E-03 | 9.90E-01 | 1.88E-09 | 5.26E-03 | 1.34E-02 |
| 446.03422 | 93.71  | 15.20 | 16.29 | 16.68 | 15.05 | 2.09E-06 | 8.38E-03 | 9.84E-05 | 9.71E-01 | 6.73E-01 | 3.66E-03 | 4.50E-05 |
| 446.05471 | 83.1   | 14.74 | 14.86 | 14.62 | 15.42 | 4.75E-02 | 9.77E-01 | 9.75E-01 | 9.40E-02 | 8.50E-01 | 2.43E-01 | 3.97E-02 |
| 446.10524 | 294.75 | 12.70 | 14.99 | 15.26 | 13.71 | 6.90E-14 | 4.12E-10 | 2.17E-12 | 1.85E-02 | 8.59E-01 | 2.05E-03 | 8.97E-05 |
| 446.28436 | 26.44  | 14.72 | 15.61 | 14.16 | 16.63 | 2.15E-10 | 4.62E-02 | 3.45E-01 | 7.78E-07 | 2.58E-04 | 2.71E-02 | 3.20E-10 |
| 446.29498 | 27.28  | 15.17 | 16.88 | 13.87 | 16.41 | 1.85E-18 | 5.89E-07 | 2.06E-04 | 7.16E-04 | 7.38E-14 | 4.89E-01 | 1.51E-12 |
| 446.32619 | 23.06  | 18.80 | 18.99 | 19.17 | 18.60 | 1.22E-01 | 8.60E-01 | 3.79E-01 | 8.41E-01 | 8.63E-01 | 4.11E-01 | 9.60E-02 |
| 446.39905 | 22.5   | 15.21 | 11.77 | 13.44 | 13.52 | 1.42E-15 | 7.48E-14 | 1.34E-05 | 7.05E-05 | 8.50E-05 | 6.71E-05 | 9.97E-01 |
| 446.66271 | 46.64  | 18.86 | 19.79 | 19.83 | 19.20 | 2.33E-14 | 5.44E-11 | 7.19E-12 | 5.51E-02 | 9.94E-01 | 1.31E-04 | 3.81E-05 |
| 446.67058 | 51.32  | 17.72 | 17.68 | 17.58 | 17.77 | 9.25E-01 | 9.99E-01 | 9.61E-01 | 9.97E-01 | 9.86E-01 | 9.88E-01 | 9.08E-01 |
| 446.76175 | 26.24  | 13.90 | 18.77 | 16.76 | 17.73 | 1.13E-35 | 3.65E-14 | 7.56E-14 | 4.56E-14 | 3.45E-08 | 1.41E-02 | 2.46E-02 |
| 446.79822 | 43.08  | 15.36 | 17.78 | 18.04 | 17.72 | 1.03E-33 | 3.94E-14 | 3.65E-14 | 5.05E-14 | 6.00E-01 | 9.93E-01 | 4.48E-01 |
| 446.84982 | 48.96  | 13.61 | 13.93 | 14.07 | 14.25 | 3.76E-01 | 8.27E-01 | 5.96E-01 | 3.22E-01 | 9.82E-01 | 8.32E-01 | 9.61E-01 |
| 446.88767 | 51.19  | 19.07 | 18.35 | 18.20 | 18.50 | 1.07E-06 | 9.06E-05 | 1.18E-06 | 4.42E-03 | 8.16E-01 | 8.15E-01 | 3.03E-01 |
| 446.91082 | 35.71  | 15.48 | 18.37 | 17.98 | 18.02 | 7.12E-28 | 4.19E-14 | 7.35E-14 | 7.38E-14 | 4.20E-01 | 5.47E-01 | 9.99E-01 |
| 446.97455 | 49.66  | 13.94 | 13.91 | 14.95 | 14.29 | 1.50E-04 | 9.99E-01 | 4.09E-04 | 5.34E-01 | 4.06E-04 | 4.78E-01 | 6.19E-02 |
| 446.97697 | 307.73 | 13.06 | 14.48 | 13.75 | 13.87 | 2.37E-06 | 3.96E-07 | 3.47E-02 | 1.08E-02 | 2.65E-02 | 1.13E-01 | 9.63E-01 |
| 447.03534 | 89.81  | 11.03 | 13.62 | 12.87 | 11.82 | 6.59E-07 | 6.53E-07 | 6.31E-04 | 3.62E-01 | 4.09E-01 | 2.20E-03 | 1.50E-01 |
| 447.06746 | 264.29 | 20.41 | 22.12 | 22.71 | 21.61 | 9.36E-23 | 1.26E-13 | 5.10E-14 | 2.50E-07 | 3.01E-02 | 8.68E-02 | 4.45E-06 |
| 447.10033 | 227.7  | 13.26 | 14.63 | 14.68 | 13.93 | 2.95E-03 | 9.01E-03 | 5.59E-03 | 4.34E-01 | 9.99E-01 | 4.14E-01 | 3.44E-01 |
| 447.13698 | 280.69 | 15.39 | 16.27 | 15.97 | 15.71 | 3.35E-04 | 1.66E-04 | 2.36E-02 | 4.35E-01 | 4.98E-01 | 5.14E-02 | 6.09E-01 |
| 447.26287 | 25.22  | 15.54 | 17.92 | 16.44 | 17.49 | 5.60E-23 | 6.29E-14 | 2.61E-04 | 8.29E-14 | 2.33E-09 | 2.53E-01 | 5.75E-05 |
| 447.32942 | 22.99  | 16.76 | 16.52 | 16.92 | 16.27 | 1.40E-01 | 8.23E-01 | 9.39E-01 | 3.21E-01 | 4.99E-01 | 8.35E-01 | 1.22E-01 |
| 447.68766 | 115.3  | 14.08 | 16.24 | 17.17 | 16.75 | 3.23E-19 | 9.18E-10 | 7.41E-14 | 2.96E-13 | 2.45E-02 | 4.34E-01 | 5.90E-01 |
| 447.73332 | 28.76  | 8.88  | 17.05 | 16.97 | 16.48 | 1.63E-50 | 3.65E-14 | 3.65E-14 | 3.65E-14 | 9.99E-01 | 6.73E-01 | 7.55E-01 |
| 447.76759 | 35.35  | 16.66 | 16.87 | 15.51 | 15.60 | 3.26E-06 | 8.95E-01 | 9.30E-04 | 4.38E-03 | 9.92E-05 | 5.74E-04 | 9.91E-01 |
| 447.791   | 49.2   | 15.30 | 16.63 | 16.74 | 15.89 | 1.46E-13 | 3.08E-10 | 7.12E-12 | 1.76E-02 | 9.46E-01 | 1.84E-03 | 2.08E-04 |
| 447.84277 | 52.87  | 16.02 | 13.12 | 13.68 | 13.91 | 3.71E-16 | 7.72E-14 | 6.61E-11 | 1.32E-08 | 3.45E-01 | 1.08E-01 | 9.09E-01 |
| 447.88066 | 51.57  | 17.83 | 18.65 | 18.93 | 18.28 | 4.65E-07 | 2.71E-04 | 3.19E-07 | 1.30E-01 | 5.05E-01 | 2.74E-01 | 9.14E-03 |
| 447.94917 | 103.88 | 13.88 | 12.95 | 14.32 | 14.73 | 3.24E-03 | 1.99E-01 | 7.68E-01 | 2.87E-01 | 2.32E-02 | 2.27E-03 | 8.43E-01 |
| 447.97107 | 50.27  | 15.26 | 15.87 | 16.12 | 15.39 | 3.67E-05 | 1.20E-02 | 7.87E-05 | 9.16E-01 | 5.71E-01 | 1.03E-01 | 2.47E-03 |
| 447.9884  | 274.32 | 15.31 | 16.58 | 17.55 | 16.36 | 7.56E-08 | 2.92E-03 | 9.58E-09 | 2.49E-02 | 4.21E-02 | 9.42E-01 | 9.62E-03 |
| 447.9885  | 98.91  | 14.11 | 19.42 | 19.10 | 18.71 | 1.15E-48 | 3.65E-14 | 3.65E-14 | 3.65E-14 | 7.26E-01 | 1.27E-01 | 6.28E-01 |
| 448.02948 | 107.27 | 16.54 | 19.51 | 17.62 | 18.11 | 1.03E-15 | 7.41E-14 | 4.19E-03 | 1.79E-05 | 1.55E-07 | 2.91E-04 | 4.63E-01 |
| 448.05376 | 69.86  | 17.39 | 19.66 | 19.26 | 18.70 | 3.88E-30 | 3.65E-14 | 6.03E-14 | 2.01E-11 | 1.13E-01 | 2.08E-06 | 1.15E-02 |
| 448.07107 | 258.12 | 16.63 | 19.11 | 19.10 | 17.90 | 2.24E-22 | 7.36E-14 | 7.21E-14 | 8.76E-06 | 1.00E+00 | 4.78E-05 | 4.97E-05 |
| 448.14319 | 68.61  | 15.42 | 15.82 | 14.28 | 14.50 | 1.36E-04 | 7.18E-01 | 1.18E-02 | 7.69E-02 | 4.55E-04 | 5.44E-03 | 9.44E-01 |
| 448.18972 | 115.72 | 12.46 | 13.88 | 14.95 | 14.33 | 6.03E-11 | 3.00E-04 | 2.79E-11 | 1.67E-06 | 1.38E-02 | 6.04E-01 | 3.14E-01 |
| 448.23916 | 272    | 15.08 | 16.71 | 17.37 | 16.47 | 1.89E-07 | 2.46E-04 | 6.65E-08 | 3.32E-03 | 3.46E-01 | 9.41E-01 | 1.27E-01 |
| 448.23962 | 111.13 | 12.06 | 19.05 | 19.29 | 18.14 | 2.59E-68 | 3.65E-14 | 3.65E-14 | 3.65E-14 | 8.74E-01 | 3.28E-02 | 3.05E-03 |
| 448.34186 | 22.9   | 22.22 | 21.75 | 21.99 | 21.85 | 2.58E-01 | 2.27E-01 | 7.63E-01 | 4.40E-01 | 7.94E-01 | 9.85E-01 | 9.48E-01 |
| 448.49054 | 110.67 | 11.59 | 17.51 | 17.73 | 16.85 | 3.61E-69 | 3.65E-14 | 3.65E-14 | 3.65E-14 | 8.54E-01 | 8.48E-02 | 9.19E-03 |
| 448.65908 | 46.58  | 18.50 | 19.40 | 19.44 | 18.84 | 4.66E-14 | 9.31E-11 | 1.00E-11 | 4.87E-02 | 9.91E-01 | 2.26E-04 | 5.86E-05 |
| 448.66765 | 51.75  | 17.61 | 17.59 | 17.51 | 17.70 | 9.41E-01 | 1.00E+00 | 9.82E-01 | 9.92E-01 | 9.92E-01 | 9.85E-01 | 9.22E-01 |
| 448.74755 | 49.28  | 19.38 | 21.03 | 20.92 | 20.71 | 2.55E-29 | 3.87E-14 | 4.96E-14 | 7.34E-14 | 8.38E-01 | 1.16E-01 | 4.74E-01 |
| 448.79982 | 40.2   | 14.45 | 14.29 | 14.47 | 13.12 | 2.78E-04 | 9.63E-01 | 1.00E+00 | 6.87E-04 | 9.52E-01 | 5.39E-03 | 7.79E-04 |

|           |        |       |       |       |       |          |          |          |          |          |          |          |
|-----------|--------|-------|-------|-------|-------|----------|----------|----------|----------|----------|----------|----------|
| 448.83478 | 28.46  | 17.45 | 17.86 | 18.01 | 17.37 | 7.41E-04 | 8.54E-02 | 7.36E-03 | 9.74E-01 | 8.44E-01 | 4.21E-02 | 3.37E-03 |
| 448.87179 | 43.79  | 19.08 | 20.99 | 21.19 | 20.43 | 3.77E-22 | 7.48E-14 | 7.18E-14 | 4.02E-09 | 7.55E-01 | 5.25E-02 | 2.56E-03 |
| 448.93243 | 45.41  | 14.84 | 15.24 | 15.61 | 15.56 | 4.39E-03 | 3.19E-01 | 5.85E-03 | 1.60E-02 | 4.19E-01 | 5.73E-01 | 9.97E-01 |
| 448.95102 | 40.63  | 13.31 | 18.61 | 17.60 | 17.44 | 1.56E-41 | 3.65E-14 | 3.65E-14 | 3.74E-14 | 1.56E-02 | 4.52E-03 | 9.61E-01 |
| 448.95153 | 172.88 | 12.93 | 12.98 | 13.60 | 12.50 | 1.72E-01 | 1.00E+00 | 4.76E-01 | 8.03E-01 | 5.66E-01 | 7.67E-01 | 1.15E-01 |
| 449.05686 | 92.5   | 12.60 | 14.44 | 12.80 | 13.13 | 1.05E-05 | 1.10E-05 | 9.49E-01 | 5.07E-01 | 1.76E-04 | 6.58E-03 | 8.31E-01 |
| 449.07633 | 207.29 | 16.99 | 15.07 | 14.88 | 17.84 | 8.65E-17 | 6.24E-07 | 2.67E-08 | 8.62E-02 | 9.49E-01 | 9.84E-12 | 3.27E-13 |
| 449.19747 | 27.53  | 14.81 | 19.77 | 18.80 | 18.98 | 6.84E-62 | 3.65E-14 | 3.65E-14 | 3.65E-14 | 1.67E-04 | 5.09E-03 | 8.63E-01 |
| 449.26631 | 33.34  | 17.65 | 13.42 | 14.10 | 14.79 | 8.55E-24 | 5.65E-14 | 7.52E-14 | 2.66E-11 | 3.07E-01 | 4.40E-03 | 3.08E-01 |
| 449.34536 | 22.94  | 20.48 | 19.77 | 20.05 | 20.01 | 2.25E-02 | 1.21E-02 | 2.36E-01 | 2.01E-01 | 6.35E-01 | 7.47E-01 | 9.99E-01 |
| 449.74304 | 47.42  | 17.37 | 18.48 | 18.79 | 18.63 | 2.69E-16 | 1.10E-09 | 8.20E-14 | 2.04E-11 | 2.76E-01 | 8.41E-01 | 7.93E-01 |
| 449.76296 | 46.29  | 16.64 | 14.12 | 13.51 | 14.28 | 2.78E-15 | 5.31E-10 | 8.86E-14 | 1.68E-08 | 3.76E-01 | 9.73E-01 | 1.90E-01 |
| 449.83846 | 43.12  | 16.13 | 15.21 | 14.82 | 15.03 | 4.65E-08 | 3.20E-04 | 7.19E-08 | 1.62E-05 | 3.20E-01 | 8.62E-01 | 8.15E-01 |
| 449.86931 | 46.72  | 13.42 | 13.27 | 12.18 | 14.09 | 3.34E-05 | 9.81E-01 | 4.99E-03 | 2.85E-01 | 2.26E-02 | 1.60E-01 | 1.03E-05 |
| 449.87753 | 51.14  | 16.45 | 17.78 | 18.11 | 17.40 | 2.26E-13 | 6.37E-09 | 3.76E-13 | 8.66E-05 | 4.01E-01 | 3.14E-01 | 6.90E-03 |
| 449.96447 | 103.26 | 15.45 | 14.67 | 16.10 | 14.90 | 1.54E-02 | 3.27E-01 | 4.83E-01 | 6.49E-01 | 1.40E-02 | 9.65E-01 | 6.46E-02 |
| 450.05873 | 80.51  | 19.19 | 16.95 | 16.17 | 16.45 | 2.15E-26 | 9.03E-14 | 4.36E-14 | 7.23E-14 | 1.99E-02 | 2.64E-01 | 7.44E-01 |
| 450.08057 | 198.3  | 18.13 | 16.85 | 17.15 | 18.62 | 9.16E-06 | 2.92E-03 | 3.55E-02 | 5.61E-01 | 8.50E-01 | 4.41E-05 | 9.25E-04 |
| 450.20082 | 27.62  | 14.59 | 16.83 | 14.92 | 16.49 | 4.73E-12 | 9.18E-10 | 7.50E-01 | 5.18E-07 | 3.92E-07 | 7.62E-01 | 7.36E-05 |
| 450.29752 | 26.27  | 15.12 | 16.19 | 13.61 | 14.86 | 5.84E-08 | 3.85E-02 | 9.24E-04 | 9.18E-01 | 7.78E-09 | 9.58E-03 | 1.62E-02 |
| 450.34784 | 23.12  | 17.36 | 15.93 | 16.41 | 16.38 | 5.07E-05 | 2.21E-05 | 9.29E-03 | 9.36E-03 | 4.01E-01 | 4.95E-01 | 1.00E+00 |
| 450.35756 | 23.14  | 19.22 | 18.77 | 18.71 | 18.46 | 1.22E-02 | 2.01E-01 | 1.05E-01 | 7.08E-03 | 9.92E-01 | 5.69E-01 | 7.32E-01 |
| 450.60955 | 46.28  | 18.55 | 18.04 | 18.22 | 17.45 | 2.31E-07 | 2.47E-02 | 2.50E-01 | 4.55E-08 | 7.58E-01 | 1.04E-02 | 3.08E-04 |
| 450.65726 | 46.73  | 17.34 | 17.99 | 18.04 | 17.47 | 1.24E-10 | 3.22E-07 | 2.35E-08 | 6.95E-01 | 9.73E-01 | 1.76E-04 | 2.48E-05 |
| 450.66475 | 52.92  | 16.80 | 16.52 | 16.34 | 16.70 | 4.76E-01 | 8.07E-01 | 4.41E-01 | 9.91E-01 | 9.40E-01 | 9.45E-01 | 6.77E-01 |
| 450.73873 | 34.22  | 19.22 | 21.30 | 20.95 | 21.00 | 2.79E-41 | 3.65E-14 | 3.65E-14 | 3.65E-14 | 4.69E-02 | 1.42E-01 | 9.81E-01 |
| 450.75406 | 48.77  | 15.94 | 17.11 | 16.89 | 17.56 | 5.32E-05 | 3.53E-03 | 2.52E-02 | 2.96E-05 | 9.20E-01 | 5.88E-01 | 2.33E-01 |
| 450.79588 | 46.61  | 13.76 | 16.63 | 16.65 | 15.21 | 4.46E-31 | 3.76E-14 | 3.72E-14 | 4.86E-08 | 1.00E+00 | 2.07E-07 | 1.04E-07 |
| 450.83476 | 39.16  | 17.38 | 15.48 | 16.13 | 15.31 | 4.48E-13 | 1.80E-10 | 3.39E-05 | 1.62E-11 | 9.23E-02 | 9.41E-01 | 2.42E-02 |
| 450.86965 | 53.96  | 18.07 | 20.61 | 20.81 | 19.92 | 4.99E-21 | 7.25E-14 | 7.56E-14 | 2.99E-09 | 9.00E-01 | 8.53E-02 | 1.28E-02 |
| 450.94845 | 41.02  | 12.66 | 14.87 | 12.34 | 13.44 | 5.13E-12 | 2.05E-09 | 7.66E-01 | 1.14E-01 | 2.13E-11 | 4.40E-04 | 1.11E-02 |
| 450.96552 | 37.51  | 14.78 | 19.14 | 18.62 | 18.25 | 1.49E-62 | 3.65E-14 | 3.65E-14 | 3.65E-14 | 5.09E-02 | 1.43E-04 | 2.62E-01 |
| 451.04974 | 38.84  | 14.91 | 15.55 | 17.39 | 14.89 | 1.03E-13 | 2.07E-01 | 3.12E-12 | 1.00E+00 | 5.76E-07 | 2.32E-01 | 3.19E-11 |
| 451.08043 | 81.33  | 16.64 | 17.37 | 15.61 | 16.62 | 2.14E-08 | 3.08E-02 | 5.98E-04 | 1.00E+00 | 2.72E-09 | 3.67E-02 | 1.93E-03 |
| 451.36097 | 23.01  | 17.39 | 16.39 | 16.36 | 16.43 | 5.88E-06 | 1.13E-04 | 5.18E-05 | 3.51E-04 | 9.99E-01 | 9.99E-01 | 9.91E-01 |
| 451.73998 | 44.22  | 18.07 | 17.98 | 18.07 | 17.51 | 5.53E-02 | 9.73E-01 | 1.00E+00 | 6.41E-02 | 9.79E-01 | 1.89E-01 | 7.90E-02 |
| 451.76036 | 40.4   | 16.15 | 13.46 | 13.81 | 16.00 | 1.31E-09 | 3.59E-07 | 9.93E-06 | 9.90E-01 | 8.90E-01 | 6.94E-06 | 1.26E-04 |
| 451.87324 | 49.6   | 14.29 | 15.52 | 15.15 | 14.86 | 3.06E-04 | 1.39E-04 | 1.37E-02 | 2.10E-01 | 5.84E-01 | 1.30E-01 | 7.68E-01 |
| 451.95354 | 55.2   | 17.83 | 14.97 | 16.96 | 16.44 | 1.06E-19 | 6.83E-14 | 6.96E-03 | 6.66E-06 | 6.51E-11 | 3.64E-06 | 2.68E-01 |
| 451.9633  | 52.57  | 20.79 | 19.60 | 20.22 | 19.33 | 4.66E-09 | 3.42E-06 | 6.48E-02 | 1.64E-08 | 4.56E-02 | 6.62E-01 | 1.46E-03 |
| 451.99422 | 305.5  | 11.20 | 17.10 | 13.66 | 13.27 | 2.07E-27 | 3.65E-14 | 4.89E-07 | 6.07E-05 | 7.71E-12 | 3.01E-13 | 8.44E-01 |
| 452.09354 | 83.63  | 13.87 | 18.11 | 17.41 | 17.79 | 2.15E-35 | 3.65E-14 | 4.43E-14 | 3.72E-14 | 1.23E-01 | 7.69E-01 | 6.36E-01 |
| 452.27688 | 27.57  | 18.13 | 17.82 | 17.17 | 17.25 | 5.57E-05 | 5.26E-01 | 1.77E-04 | 1.36E-03 | 2.89E-02 | 9.31E-02 | 9.83E-01 |
| 452.37326 | 23.05  | 19.08 | 18.58 | 18.88 | 18.35 | 3.15E-02 | 2.04E-01 | 8.66E-01 | 2.78E-02 | 6.47E-01 | 8.23E-01 | 1.87E-01 |
| 452.60784 | 45.99  | 19.61 | 19.41 | 19.56 | 18.97 | 5.12E-05 | 4.38E-01 | 9.85E-01 | 5.51E-05 | 6.76E-01 | 1.69E-02 | 3.38E-04 |
| 452.74199 | 46.61  | 18.28 | 19.60 | 19.53 | 19.48 | 1.96E-28 | 4.72E-14 | 5.81E-14 | 7.18E-14 | 9.41E-01 | 7.57E-01 | 9.72E-01 |
| 452.76468 | 27.64  | 15.72 | 19.06 | 18.35 | 19.36 | 2.86E-26 | 7.07E-14 | 1.04E-13 | 5.14E-14 | 1.29E-01 | 8.02E-01 | 1.36E-02 |
| 452.79421 | 46.63  | 10.90 | 16.43 | 16.43 | 15.01 | 3.47E-50 | 3.65E-14 | 3.65E-14 | 3.67E-14 | 1.00E+00 | 1.78E-04 | 1.60E-04 |
| 452.83143 | 49.24  | 17.83 | 19.07 | 19.41 | 19.19 | 2.05E-30 | 7.47E-14 | 3.67E-14 | 6.47E-14 | 4.36E-02 | 7.86E-01 | 3.62E-01 |
| 452.8665  | 57.09  | 16.01 | 18.38 | 18.70 | 17.80 | 6.17E-24 | 7.43E-14 | 5.72E-14 | 9.17E-11 | 5.69E-01 | 1.22E-01 | 3.19E-03 |
| 452.95685 | 54.21  | 21.19 | 21.21 | 20.72 | 20.12 | 3.21E-06 | 1.00E+00 | 1.33E-01 | 1.31E-05 | 1.29E-01 | 1.78E-05 | 3.75E-02 |
| 453.07287 | 71.47  | 15.80 | 17.13 | 17.78 | 16.78 | 2.01E-15 | 3.59E-08 | 7.49E-14 | 1.26E-04 | 2.29E-02 | 4.34E-01 | 1.35E-04 |
| 453.20926 | 31.38  | 17.18 | 18.13 | 17.39 | 18.59 | 1.05E-08 | 3.34E-04 | 8.03E-01 | 6.92E-08 | 1.06E-02 | 2.42E-01 | 9.00E-06 |
| 453.23545 | 32.1   | 13.16 | 14.94 | 16.88 | 16.47 | 5.38E-11 | 6.28E-03 | 2.78E-10 | 6.19E-08 | 3.32E-03 | 4.17E-02 | 8.90E-01 |
| 453.26634 | 27.07  | 14.52 | 17.13 | 16.94 | 18.25 | 6.81E-15 | 1.52E-08 | 1.26E-07 | 8.18E-14 | 9.71E-01 | 5.87E-02 | 1.68E-02 |
| 453.37666 | 22.9   | 17.04 | 16.03 | 16.55 | 16.29 | 1.90E-03 | 1.07E-03 | 2.51E-01 | 3.27E-02 | 2.25E-01 | 7.92E-01 | 7.86E-01 |
| 453.73658 | 46.29  | 17.40 | 17.42 | 17.42 | 17.71 | 4.35E-01 | 1.00E+00 | 1.00E+00 | 4.52E-01 | 1.00E+00 | 5.40E-01 | 5.32E-01 |
| 453.78154 | 43.84  | 16.22 | 13.80 | 12.04 | 13.68 | 3.16E-14 | 6.22E-06 | 7.61E-14 | 3.55E-06 | 2.41E-03 | 9.95E-01 | 7.37E-03 |
| 453.82417 | 46.17  | 16.70 | 18.06 | 18.38 | 17.49 | 1.23E-14 | 8.85E-10 | 1.09E-13 | 1.21E-03 | 4.08E-01 | 3.72E-02 | 1.93E-04 |
| 453.95551 | 49.84  | 19.50 | 17.94 | 18.43 | 17.73 | 1.12E-15 | 5.89E-12 | 2.29E-06 | 1.07E-13 | 9.37E-02 | 7.55E-01 | 6.68E-03 |
| 454.09066 | 82.77  | 14.34 | 14.43 | 12.79 | 14.52 | 8.79E-08 | 9.94E-01 | 6.64E-06 | 9.46E-01 | 4.28E-06 | 9.92E-01 | 1.96E-06 |
| 454.29266 | 29.46  | 21.46 | 21.25 | 21.07 | 20.62 | 1.16E-09 | 2.76E-01 | 5.88E-03 | 2.86E-10 | 4.71E-01 | 6.63E-06 | 1.92E-03 |
| 454.3881  | 23.07  | 19.36 | 18.28 | 18.57 | 18.44 | 1.39E-06 | 2.43E-06 | 8.22E-04 | 1.36E-04 | 5.28E-01 | 8.80E-01 | 9.40E-01 |
| 454.60463 | 47.4   | 19.45 | 19.22 | 19.34 | 18.69 | 1.58E-03 | 6.37E-01 | 9.34E-01 | 1.01E-03 | 9.37E-01 | 5.15E-02 | 9.39E-03 |
| 454.63081 | 280.68 | 18.33 | 19.04 | 19.32 | 18.54 | 1.98E-07 | 5.72E-04 | 4.84E-07 | 6.63E-01 | 4.40E-01 | 4.43E-02 | 3.12E-04 |
| 454.69435 | 46.68  | 17.96 | 19.33 | 19.39 | 18.87 | 2.67E-25 | 6.94E-14 | 5.65E-14 | 5.00E-10 | 9.75E-01 | 5.13E-03 | 1.09E-03 |
| 454.70234 | 48.18  | 17.06 | 17.46 | 17.26 | 17.44 | 2.54E-01 | 2.76E-01 | 7.90E-01 | 3.42E-01 | 8.25E-01 | 1.00E+00 | 8.73E-01 |
| 454.74423 | 49.1   | 16.09 | 16.48 | 16.30 | 16.89 | 7.91E-03 | 3.21E-01 | 7.94E-01 | 3.98E-03 | 8.64E-01 | 3.21E-01 | 6.50E-02 |

|           |        |       |       |       |       |          |          |          |          |          |          |          |
|-----------|--------|-------|-------|-------|-------|----------|----------|----------|----------|----------|----------|----------|
| 454.76691 | 44.32  | 13.95 | 13.43 | 15.46 | 14.06 | 1.85E-04 | 6.63E-01 | 4.76E-03 | 9.95E-01 | 1.06E-04 | 5.53E-01 | 1.85E-02 |
| 454.792   | 43.73  | 13.92 | 13.43 | 13.88 | 13.68 | 3.37E-01 | 3.28E-01 | 9.99E-01 | 8.50E-01 | 4.37E-01 | 8.46E-01 | 9.18E-01 |
| 454.83003 | 48.19  | 16.02 | 17.61 | 17.96 | 17.80 | 5.32E-29 | 7.49E-14 | 3.81E-14 | 6.56E-14 | 1.41E-01 | 6.79E-01 | 7.67E-01 |
| 454.85187 | 25.97  | 16.65 | 12.51 | 14.30 | 14.26 | 8.11E-19 | 7.15E-14 | 6.21E-08 | 1.06E-07 | 1.07E-04 | 2.91E-04 | 1.00E+00 |
| 454.86431 | 83.95  | 14.34 | 15.26 | 15.87 | 15.03 | 7.48E-05 | 2.45E-02 | 1.88E-05 | 1.62E-01 | 2.57E-01 | 9.07E-01 | 6.67E-02 |
| 454.8796  | 47.15  | 14.59 | 14.36 | 15.11 | 14.65 | 3.17E-01 | 9.35E-01 | 5.50E-01 | 9.99E-01 | 2.51E-01 | 8.97E-01 | 6.88E-01 |
| 454.95439 | 54.62  | 17.83 | 17.10 | 16.09 | 16.09 | 1.02E-10 | 3.93E-02 | 5.13E-09 | 1.72E-08 | 2.33E-03 | 3.48E-03 | 1.00E+00 |
| 455.05703 | 66.48  | 15.58 | 15.85 | 15.82 | 16.51 | 9.45E-02 | 8.84E-01 | 9.15E-01 | 6.27E-02 | 1.00E+00 | 3.10E-01 | 2.62E-01 |
| 455.07539 | 70.74  | 14.44 | 13.32 | 14.56 | 13.29 | 1.48E-02 | 1.11E-01 | 9.95E-01 | 1.12E-01 | 7.27E-02 | 1.00E+00 | 7.41E-02 |
| 455.13231 | 282.42 | 16.86 | 17.16 | 17.44 | 16.66 | 6.37E-05 | 2.86E-01 | 2.95E-03 | 6.20E-01 | 3.44E-01 | 2.42E-02 | 6.38E-05 |
| 455.29614 | 27.51  | 19.25 | 18.90 | 18.76 | 18.46 | 1.00E-11 | 2.86E-03 | 7.57E-06 | 1.92E-12 | 5.17E-01 | 2.32E-04 | 2.20E-02 |
| 455.39219 | 22.82  | 17.48 | 15.53 | 16.14 | 16.38 | 2.46E-13 | 1.43E-13 | 1.82E-07 | 4.90E-05 | 5.65E-02 | 4.30E-03 | 7.74E-01 |
| 455.63412 | 278.85 | 14.94 | 13.74 | 14.39 | 13.96 | 1.32E-03 | 1.16E-03 | 2.96E-01 | 1.46E-02 | 1.96E-01 | 9.20E-01 | 5.65E-01 |
| 455.77828 | 49.51  | 16.45 | 16.31 | 14.53 | 16.23 | 2.62E-05 | 9.89E-01 | 6.32E-05 | 9.60E-01 | 4.06E-04 | 9.98E-01 | 1.21E-03 |
| 455.8229  | 49.74  | 16.00 | 17.66 | 17.99 | 17.00 | 1.26E-18 | 5.96E-13 | 7.47E-14 | 3.49E-05 | 4.19E-01 | 1.48E-02 | 5.33E-05 |
| 455.95528 | 80.29  | 15.47 | 16.79 | 16.75 | 15.97 | 1.83E-03 | 5.05E-03 | 6.56E-03 | 5.99E-01 | 1.00E+00 | 2.04E-01 | 2.40E-01 |
| 455.98579 | 41.02  | 14.55 | 16.87 | 16.48 | 16.12 | 9.15E-27 | 3.87E-14 | 7.49E-14 | 7.00E-13 | 2.00E-01 | 1.68E-03 | 2.86E-01 |
| 456.07146 | 271.43 | 16.93 | 19.61 | 19.70 | 19.52 | 2.13E-21 | 7.54E-14 | 7.47E-14 | 8.49E-14 | 9.91E-01 | 9.91E-01 | 9.37E-01 |
| 456.09367 | 83.2   | 13.05 | 15.16 | 13.83 | 15.02 | 2.31E-06 | 1.28E-05 | 2.71E-01 | 9.02E-05 | 1.57E-02 | 9.90E-01 | 4.67E-02 |
| 456.10726 | 68.75  | 15.68 | 18.05 | 17.71 | 17.89 | 1.91E-18 | 7.66E-14 | 2.44E-12 | 2.89E-13 | 6.11E-01 | 9.46E-01 | 9.19E-01 |
| 456.40447 | 22.76  | 17.52 | 15.20 | 15.47 | 15.63 | 4.86E-21 | 7.38E-14 | 7.55E-14 | 1.14E-12 | 6.79E-01 | 3.03E-01 | 9.08E-01 |
| 456.57268 | 278.86 | 14.24 | 16.90 | 16.84 | 17.22 | 5.87E-20 | 9.80E-14 | 1.29E-13 | 7.41E-14 | 9.97E-01 | 7.78E-01 | 6.54E-01 |
| 456.60241 | 46.23  | 18.87 | 18.35 | 18.53 | 17.75 | 3.65E-06 | 5.08E-02 | 3.16E-01 | 8.00E-07 | 8.27E-01 | 2.50E-02 | 1.51E-03 |
| 456.63404 | 299.85 | 16.24 | 18.11 | 18.09 | 17.55 | 2.63E-24 | 6.92E-14 | 6.92E-14 | 5.70E-11 | 9.99E-01 | 1.62E-02 | 2.19E-02 |
| 456.64488 | 128.79 | 8.69  | 14.20 | 13.43 | 13.79 | 2.94E-34 | 3.65E-14 | 4.43E-14 | 3.87E-14 | 2.62E-01 | 7.87E-01 | 8.33E-01 |
| 456.69519 | 47.43  | 19.61 | 20.57 | 20.53 | 20.11 | 8.96E-11 | 2.37E-09 | 7.46E-09 | 6.53E-03 | 9.94E-01 | 1.55E-02 | 3.01E-02 |
| 456.74178 | 47.48  | 14.51 | 14.10 | 15.42 | 14.19 | 8.83E-04 | 6.17E-01 | 4.04E-02 | 7.98E-01 | 1.20E-03 | 9.94E-01 | 4.25E-03 |
| 456.76522 | 38.24  | 15.52 | 16.17 | 16.41 | 17.60 | 6.14E-07 | 2.42E-01 | 5.00E-02 | 1.07E-07 | 9.07E-01 | 7.40E-04 | 6.74E-03 |
| 456.78544 | 27.53  | 15.02 | 19.22 | 17.73 | 18.55 | 2.93E-43 | 3.65E-14 | 5.72E-14 | 3.65E-14 | 9.24E-08 | 5.59E-02 | 9.56E-03 |
| 456.84518 | 269.92 | 12.69 | 15.95 | 16.52 | 15.74 | 7.04E-14 | 1.37E-09 | 9.04E-13 | 3.41E-08 | 6.65E-01 | 9.78E-01 | 4.29E-01 |
| 457.04271 | 266.96 | 12.59 | 13.68 | 15.46 | 14.90 | 1.22E-06 | 1.93E-01 | 1.55E-06 | 3.04E-04 | 8.73E-03 | 1.52E-01 | 7.60E-01 |
| 457.04449 | 67.03  | 15.39 | 13.37 | 13.62 | 13.80 | 1.03E-06 | 3.14E-06 | 5.08E-05 | 6.00E-04 | 9.19E-01 | 7.20E-01 | 9.72E-01 |
| 457.09191 | 66.92  | 14.88 | 12.85 | 15.07 | 13.49 | 4.32E-11 | 3.84E-08 | 9.43E-01 | 4.18E-04 | 4.37E-09 | 2.84E-01 | 6.92E-05 |
| 457.13602 | 300.1  | 14.62 | 15.57 | 15.23 | 14.77 | 1.62E-03 | 1.89E-03 | 8.83E-02 | 9.48E-01 | 5.79E-01 | 2.05E-02 | 3.31E-01 |
| 457.16835 | 86.46  | 15.85 | 14.93 | 15.57 | 15.18 | 4.63E-02 | 3.98E-02 | 8.46E-01 | 2.34E-01 | 2.66E-01 | 9.00E-01 | 7.03E-01 |
| 457.2273  | 33.12  | 14.32 | 15.28 | 19.08 | 18.00 | 3.39E-29 | 7.30E-02 | 3.74E-14 | 7.43E-14 | 7.41E-14 | 2.21E-09 | 4.78E-02 |
| 457.27125 | 45.03  | 19.34 | 18.08 | 18.46 | 18.44 | 1.29E-39 | 3.65E-14 | 4.70E-14 | 4.79E-14 | 1.21E-05 | 1.03E-04 | 9.87E-01 |
| 457.28636 | 24.1   | 15.39 | 18.28 | 15.86 | 17.64 | 3.01E-23 | 7.12E-14 | 3.34E-01 | 1.33E-12 | 1.01E-13 | 1.37E-01 | 3.51E-08 |
| 457.40751 | 22.55  | 14.49 | 10.57 | 11.36 | 11.25 | 3.82E-19 | 7.43E-14 | 2.52E-12 | 2.60E-12 | 2.43E-01 | 4.06E-01 | 9.94E-01 |
| 457.53233 | 56.38  | 14.79 | 15.20 | 14.12 | 15.88 | 4.67E-03 | 8.13E-01 | 4.71E-01 | 1.05E-01 | 1.10E-01 | 5.15E-01 | 2.24E-03 |
| 457.72661 | 29.96  | 9.11  | 11.67 | 17.76 | 15.96 | 4.89E-34 | 3.40E-04 | 3.65E-14 | 6.56E-14 | 7.47E-14 | 3.57E-09 | 3.29E-02 |
| 457.77564 | 37.41  | 15.73 | 17.52 | 16.63 | 17.81 | 2.71E-06 | 1.00E-04 | 1.14E-01 | 7.38E-06 | 1.50E-01 | 9.04E-01 | 3.22E-02 |
| 457.79427 | 32.66  | 14.96 | 16.88 | 14.22 | 16.68 | 8.55E-10 | 8.16E-05 | 3.15E-01 | 8.10E-04 | 4.64E-08 | 9.71E-01 | 9.70E-07 |
| 457.81984 | 50.98  | 14.59 | 14.80 | 14.89 | 13.71 | 1.73E-02 | 9.39E-01 | 8.54E-01 | 1.14E-01 | 9.97E-01 | 3.51E-02 | 1.83E-02 |
| 457.82469 | 117.59 | 12.49 | 14.09 | 9.83  | 14.09 | 3.43E-23 | 5.15E-04 | 9.11E-10 | 7.56E-04 | 7.11E-14 | 1.00E+00 | 7.27E-14 |
| 457.89905 | 96.43  | 14.62 | 17.23 | 15.75 | 15.83 | 1.39E-17 | 7.38E-14 | 8.90E-05 | 5.13E-05 | 4.92E-07 | 4.51E-06 | 9.93E-01 |
| 457.90838 | 53.66  | 19.77 | 18.62 | 18.80 | 18.25 | 2.47E-09 | 4.68E-06 | 1.37E-04 | 2.86E-09 | 8.61E-01 | 4.30E-01 | 1.02E-01 |
| 457.92537 | 86.09  | 14.90 | 19.92 | 19.86 | 18.36 | 4.28E-39 | 3.65E-14 | 3.65E-14 | 7.35E-14 | 9.98E-01 | 1.53E-04 | 2.81E-04 |
| 457.97111 | 52.08  | 21.74 | 22.82 | 23.19 | 22.06 | 3.88E-15 | 2.88E-08 | 1.43E-13 | 2.76E-01 | 1.67E-01 | 4.77E-04 | 3.45E-08 |
| 458.01487 | 84.07  | 16.11 | 18.12 | 17.68 | 17.28 | 1.60E-09 | 1.43E-09 | 2.26E-06 | 1.27E-03 | 4.89E-01 | 4.46E-02 | 5.82E-01 |
| 458.07576 | 62.1   | 15.62 | 18.21 | 18.88 | 17.78 | 3.41E-32 | 6.05E-14 | 3.65E-14 | 7.35E-14 | 3.01E-02 | 3.13E-01 | 8.02E-05 |
| 458.23269 | 30.29  | 13.22 | 11.71 | 16.48 | 14.44 | 3.33E-16 | 1.56E-02 | 2.75E-09 | 9.21E-02 | 7.58E-14 | 4.23E-06 | 8.29E-04 |
| 458.27514 | 41.93  | 17.00 | 16.79 | 16.36 | 17.88 | 1.58E-07 | 8.21E-01 | 3.82E-02 | 2.27E-03 | 2.99E-01 | 1.48E-04 | 3.68E-08 |
| 458.34715 | 23.32  | 15.71 | 14.29 | 13.42 | 14.57 | 2.11E-07 | 1.42E-03 | 3.68E-08 | 2.11E-02 | 1.22E-01 | 8.96E-01 | 2.31E-02 |
| 458.59952 | 46.38  | 17.49 | 16.50 | 16.67 | 15.99 | 1.48E-11 | 2.90E-06 | 1.45E-04 | 4.14E-12 | 8.07E-01 | 6.23E-02 | 4.45E-03 |
| 458.69173 | 47.29  | 19.12 | 19.95 | 19.93 | 19.58 | 1.02E-09 | 2.05E-08 | 3.69E-08 | 5.73E-03 | 9.98E-01 | 4.90E-02 | 6.92E-02 |
| 458.73764 | 48.29  | 14.07 | 16.06 | 16.87 | 15.83 | 9.76E-15 | 2.17E-08 | 7.78E-14 | 1.72E-06 | 7.19E-02 | 9.07E-01 | 1.30E-02 |
| 458.76221 | 32.57  | 14.86 | 16.45 | 14.56 | 16.36 | 7.67E-07 | 5.72E-04 | 8.71E-01 | 1.97E-03 | 4.03E-05 | 9.96E-01 | 1.70E-04 |
| 458.77386 | 45.46  | 18.57 | 20.68 | 20.54 | 20.68 | 6.83E-46 | 3.65E-14 | 3.65E-14 | 3.65E-14 | 7.48E-01 | 1.00E+00 | 7.51E-01 |
| 458.78561 | 48.29  | 15.35 | 16.76 | 16.40 | 17.25 | 3.41E-07 | 1.29E-04 | 6.82E-03 | 2.18E-07 | 7.07E-01 | 4.77E-01 | 6.33E-02 |
| 458.80083 | 26.56  | 14.65 | 17.12 | 13.28 | 16.70 | 3.46E-21 | 2.79E-09 | 1.92E-03 | 2.00E-06 | 7.49E-14 | 7.15E-01 | 8.50E-14 |
| 458.8284  | 36.45  | 15.42 | 18.12 | 17.38 | 17.33 | 2.04E-21 | 6.49E-14 | 9.51E-13 | 1.84E-11 | 2.40E-02 | 1.69E-02 | 9.96E-01 |
| 458.90234 | 51.81  | 18.78 | 19.81 | 20.09 | 19.12 | 1.95E-08 | 4.64E-05 | 7.94E-08 | 4.63E-01 | 6.01E-01 | 2.09E-02 | 2.86E-04 |
| 458.93101 | 88.19  | 15.00 | 16.15 | 15.28 | 15.59 | 2.37E-05 | 1.03E-05 | 6.18E-01 | 6.74E-02 | 2.04E-03 | 1.14E-01 | 5.84E-01 |
| 458.94727 | 113.62 | 12.48 | 13.72 | 11.51 | 14.09 | 8.37E-07 | 4.78E-02 | 1.72E-01 | 6.59E-03 | 5.71E-05 | 8.90E-01 | 3.56E-06 |
| 458.97369 | 51.74  | 17.40 | 18.44 | 18.85 | 17.62 | 4.45E-12 | 5.05E-06 | 8.62E-11 | 7.39E-01 | 2.12E-01 | 1.07E-03 | 1.97E-07 |
| 459.01204 | 55.99  | 16.24 | 15.44 | 13.12 | 14.43 | 2.71E-08 | 3.89E-01 | 1.38E-08 | 3.27E-03 | 7.04E-05 | 2.38E-01 | 6.76E-02 |
| 459.03669 | 75.64  | 17.00 | 18.70 | 18.27 | 18.07 | 4.72E-16 | 7.39E-14 | 4.62E-10 | 4.24E-07 | 1.22E-01 | 1.05E-02 | 7.49E-01 |

|           |        |       |       |       |       |          |          |          |          |          |          |          |
|-----------|--------|-------|-------|-------|-------|----------|----------|----------|----------|----------|----------|----------|
| 459.05624 | 37.34  | 13.93 | 11.16 | 15.68 | 12.79 | 5.68E-20 | 1.74E-09 | 1.87E-04 | 4.22E-02 | 6.94E-14 | 1.74E-03 | 1.81E-09 |
| 459.08962 | 68.17  | 16.67 | 16.68 | 16.39 | 16.68 | 8.28E-01 | 1.00E+00 | 8.63E-01 | 1.00E+00 | 8.61E-01 | 1.00E+00 | 8.72E-01 |
| 459.11561 | 78.22  | 13.56 | 14.48 | 14.37 | 15.01 | 3.09E-02 | 2.22E-01 | 3.20E-01 | 1.70E-02 | 9.96E-01 | 7.08E-01 | 5.67E-01 |
| 459.21704 | 24.71  | 14.45 | 16.43 | 15.25 | 16.87 | 2.91E-07 | 6.21E-05 | 2.55E-01 | 1.09E-06 | 4.64E-02 | 7.70E-01 | 2.87E-03 |
| 459.59949 | 303.72 | 14.32 | 14.13 | 14.33 | 13.77 | 3.85E-01 | 9.42E-01 | 1.00E+00 | 4.05E-01 | 9.38E-01 | 7.64E-01 | 4.11E-01 |
| 459.61719 | 303.38 | 14.40 | 18.93 | 18.75 | 16.82 | 5.21E-50 | 3.65E-14 | 3.65E-14 | 7.56E-14 | 9.04E-01 | 1.02E-12 | 3.68E-11 |
| 459.7745  | 48.25  | 16.42 | 18.25 | 18.24 | 18.20 | 4.50E-36 | 3.65E-14 | 3.65E-14 | 3.72E-14 | 1.00E+00 | 9.91E-01 | 9.93E-01 |
| 459.90198 | 47.92  | 16.85 | 16.25 | 16.60 | 16.25 | 8.46E-02 | 1.18E-01 | 7.74E-01 | 1.39E-01 | 5.94E-01 | 1.00E+00 | 6.24E-01 |
| 459.95585 | 49.45  | 15.49 | 14.22 | 15.15 | 14.99 | 2.15E-03 | 8.87E-04 | 7.17E-01 | 4.43E-01 | 3.36E-02 | 1.30E-01 | 9.67E-01 |
| 459.9675  | 51.99  | 19.31 | 20.23 | 20.56 | 19.44 | 1.15E-14 | 2.81E-07 | 1.72E-12 | 8.63E-01 | 1.91E-01 | 4.43E-05 | 2.05E-09 |
| 459.98294 | 141.13 | 15.77 | 16.76 | 17.30 | 16.81 | 9.02E-13 | 3.06E-06 | 3.31E-13 | 1.62E-06 | 3.15E-02 | 9.94E-01 | 7.37E-02 |
| 460.03989 | 248.89 | 14.40 | 12.77 | 15.32 | 13.86 | 1.40E-12 | 1.82E-06 | 1.47E-02 | 3.19E-01 | 3.23E-13 | 5.62E-03 | 5.72E-05 |
| 460.11841 | 303.56 | 15.10 | 16.95 | 16.86 | 14.99 | 2.56E-18 | 1.31E-11 | 8.61E-11 | 9.72E-01 | 9.82E-01 | 1.22E-11 | 7.38E-11 |
| 460.21119 | 52.63  | 13.90 | 16.15 | 14.90 | 14.80 | 3.74E-07 | 4.79E-08 | 3.78E-02 | 9.60E-02 | 7.21E-03 | 4.20E-03 | 9.93E-01 |
| 460.27134 | 26.78  | 11.56 | 16.48 | 11.58 | 14.96 | 6.19E-15 | 6.89E-12 | 1.00E+00 | 4.62E-06 | 2.49E-11 | 1.27E-01 | 9.20E-06 |
| 460.54051 | 55.93  | 15.15 | 16.61 | 15.18 | 16.42 | 7.01E-08 | 1.01E-05 | 1.00E+00 | 2.41E-04 | 2.55E-05 | 9.35E-01 | 4.94E-04 |
| 460.63879 | 46.05  | 17.70 | 18.35 | 18.45 | 17.83 | 2.38E-08 | 2.74E-05 | 6.75E-07 | 8.07E-01 | 8.90E-01 | 2.47E-03 | 1.50E-04 |
| 460.64743 | 50.39  | 15.54 | 16.41 | 16.04 | 16.02 | 1.31E-01 | 8.09E-02 | 5.08E-01 | 5.65E-01 | 7.52E-01 | 7.47E-01 | 1.00E+00 |
| 460.69026 | 47.53  | 17.53 | 18.28 | 18.26 | 17.93 | 2.19E-06 | 1.32E-05 | 1.86E-05 | 5.41E-02 | 9.99E-01 | 1.53E-01 | 1.86E-01 |
| 460.73635 | 46.88  | 12.66 | 14.85 | 15.56 | 13.66 | 6.69E-12 | 4.21E-07 | 1.37E-11 | 6.34E-02 | 3.03E-01 | 2.46E-02 | 4.67E-05 |
| 460.77444 | 45.37  | 18.63 | 20.19 | 20.21 | 20.27 | 2.23E-40 | 3.65E-14 | 3.65E-14 | 3.65E-14 | 9.96E-01 | 9.00E-01 | 9.65E-01 |
| 460.78291 | 46.32  | 16.32 | 17.55 | 17.34 | 17.83 | 1.20E-07 | 2.12E-05 | 5.38E-04 | 2.28E-07 | 8.58E-01 | 7.29E-01 | 2.68E-01 |
| 460.822   | 44.41  | 16.00 | 17.71 | 17.39 | 17.27 | 2.70E-22 | 6.61E-14 | 7.74E-14 | 2.24E-12 | 2.06E-01 | 5.09E-02 | 9.01E-01 |
| 460.87011 | 32.55  | 17.04 | 13.51 | 13.63 | 14.31 | 1.14E-22 | 7.38E-14 | 7.49E-14 | 3.98E-12 | 9.85E-01 | 1.38E-01 | 2.62E-01 |
| 460.89945 | 51.88  | 17.95 | 18.54 | 18.85 | 17.90 | 3.92E-06 | 1.79E-02 | 5.81E-05 | 9.96E-01 | 4.46E-01 | 1.50E-02 | 6.62E-05 |
| 460.94254 | 54.24  | 14.99 | 15.71 | 14.03 | 13.77 | 9.88E-04 | 4.85E-01 | 2.21E-01 | 8.86E-02 | 7.17E-03 | 1.98E-03 | 9.62E-01 |
| 460.96723 | 249.31 | 13.39 | 15.94 | 16.21 | 14.50 | 1.87E-06 | 7.18E-05 | 7.04E-06 | 2.32E-01 | 9.67E-01 | 8.26E-02 | 2.39E-02 |
| 461.01987 | 84.25  | 16.46 | 17.93 | 17.95 | 17.50 | 1.22E-17 | 8.96E-14 | 7.76E-14 | 9.16E-08 | 9.99E-01 | 8.73E-02 | 6.27E-02 |
| 461.74597 | 31.92  | 12.68 | 14.94 | 17.29 | 16.14 | 4.36E-12 | 1.26E-03 | 2.40E-12 | 3.91E-07 | 1.05E-03 | 2.41E-01 | 2.67E-01 |
| 461.77189 | 49.24  | 16.65 | 18.40 | 18.50 | 18.37 | 3.35E-34 | 3.74E-14 | 3.65E-14 | 4.16E-14 | 9.02E-01 | 9.98E-01 | 8.36E-01 |
| 461.96368 | 52.29  | 14.05 | 14.29 | 15.07 | 14.24 | 1.12E-02 | 8.77E-01 | 8.13E-03 | 9.37E-01 | 8.42E-02 | 9.99E-01 | 6.86E-02 |
| 462.01102 | 95.52  | 16.07 | 15.13 | 15.76 | 15.50 | 1.11E-02 | 5.99E-03 | 6.93E-01 | 2.12E-01 | 1.35E-01 | 6.03E-01 | 8.21E-01 |
| 462.07136 | 270.68 | 14.82 | 14.70 | 16.33 | 15.16 | 1.09E-11 | 9.58E-01 | 8.84E-10 | 4.69E-01 | 1.85E-10 | 2.38E-01 | 9.75E-06 |
| 462.10212 | 141.66 | 16.53 | 16.45 | 17.14 | 17.00 | 1.55E-01 | 9.96E-01 | 2.97E-01 | 5.57E-01 | 2.26E-01 | 4.54E-01 | 9.82E-01 |
| 462.14619 | 20.54  | 16.34 | 12.98 | 13.44 | 14.67 | 3.25E-11 | 1.67E-10 | 2.61E-08 | 4.36E-03 | 7.86E-01 | 5.67E-03 | 7.25E-02 |
| 462.16765 | 101.14 | 14.98 | 15.44 | 14.39 | 15.39 | 4.06E-05 | 1.98E-01 | 5.38E-02 | 3.00E-01 | 9.41E-05 | 9.98E-01 | 3.03E-04 |
| 462.19405 | 96.93  | 14.83 | 16.70 | 16.21 | 15.88 | 7.33E-19 | 7.45E-14 | 1.14E-11 | 7.41E-07 | 5.10E-02 | 2.41E-04 | 3.26E-01 |
| 462.29614 | 28.02  | 17.31 | 14.98 | 15.69 | 15.63 | 1.66E-11 | 1.25E-11 | 2.37E-06 | 2.15E-06 | 1.21E-01 | 2.10E-01 | 9.97E-01 |
| 462.32075 | 23.35  | 16.62 | 17.72 | 16.74 | 15.88 | 3.89E-06 | 3.42E-03 | 9.79E-01 | 1.14E-01 | 1.53E-02 | 7.63E-07 | 5.27E-02 |
| 462.64055 | 49.6   | 19.59 | 19.99 | 20.01 | 19.39 | 4.57E-04 | 7.64E-02 | 5.16E-02 | 6.18E-01 | 9.99E-01 | 3.57E-03 | 2.08E-03 |
| 462.75313 | 31.59  | 12.04 | 15.68 | 16.46 | 15.00 | 3.28E-10 | 4.59E-07 | 5.58E-10 | 9.44E-05 | 6.57E-01 | 7.63E-01 | 1.53E-01 |
| 462.77404 | 44.87  | 16.64 | 18.21 | 18.31 | 18.43 | 1.47E-29 | 6.83E-14 | 5.10E-14 | 4.23E-14 | 9.19E-01 | 5.12E-01 | 8.68E-01 |
| 462.82618 | 39.04  | 15.21 | 16.06 | 16.45 | 15.84 | 1.91E-11 | 3.00E-06 | 4.54E-12 | 1.38E-03 | 9.81E-02 | 5.81E-01 | 2.73E-03 |
| 462.86125 | 49.93  | 18.08 | 17.65 | 18.12 | 17.97 | 2.80E-02 | 4.80E-02 | 9.95E-01 | 9.21E-01 | 3.09E-02 | 2.55E-01 | 8.36E-01 |
| 462.88497 | 39.47  | 16.33 | 20.37 | 19.96 | 19.73 | 4.39E-62 | 3.65E-14 | 3.65E-14 | 3.65E-14 | 1.42E-01 | 7.95E-03 | 6.55E-01 |
| 463.07    | 85.52  | 15.52 | 18.11 | 18.05 | 17.13 | 1.16E-23 | 7.14E-14 | 7.25E-14 | 7.50E-09 | 9.93E-01 | 1.35E-03 | 3.10E-03 |
| 463.15791 | 83.09  | 16.96 | 18.15 | 16.56 | 16.95 | 6.03E-11 | 5.68E-07 | 2.29E-01 | 1.00E+00 | 4.70E-11 | 1.86E-06 | 3.11E-01 |
| 463.23599 | 24.73  | 13.81 | 15.79 | 12.29 | 15.94 | 1.01E-10 | 2.05E-03 | 2.77E-02 | 1.10E-03 | 1.25E-08 | 9.94E-01 | 7.01E-09 |
| 463.25913 | 261.76 | 17.94 | 15.42 | 14.83 | 15.12 | 6.87E-20 | 2.63E-12 | 7.46E-14 | 1.10E-13 | 2.99E-01 | 8.28E-01 | 8.31E-01 |
| 463.25956 | 141.07 | 16.90 | 14.85 | 15.40 | 15.24 | 1.72E-05 | 1.89E-05 | 2.80E-03 | 1.22E-03 | 5.96E-01 | 8.23E-01 | 9.86E-01 |
| 463.32415 | 23.01  | 14.00 | 13.96 | 13.04 | 12.72 | 2.49E-03 | 1.00E+00 | 6.98E-02 | 9.59E-03 | 1.08E-01 | 1.76E-02 | 8.66E-01 |
| 463.37818 | 292    | 17.10 | 15.26 | 15.71 | 14.44 | 1.24E-17 | 3.74E-10 | 2.29E-06 | 7.34E-14 | 3.53E-01 | 2.07E-02 | 5.34E-05 |
| 463.58815 | 64.18  | 14.70 | 16.12 | 16.49 | 15.66 | 3.08E-14 | 2.32E-09 | 1.15E-13 | 1.19E-04 | 3.28E-01 | 2.03E-01 | 1.91E-03 |
| 463.77294 | 48.11  | 14.54 | 17.00 | 17.10 | 16.64 | 4.40E-31 | 3.96E-14 | 3.72E-14 | 7.53E-14 | 9.68E-01 | 3.43E-01 | 1.48E-01 |
| 463.85344 | 49.79  | 17.46 | 17.38 | 18.17 | 16.62 | 1.10E-05 | 9.91E-01 | 5.12E-02 | 2.05E-02 | 2.92E-02 | 5.67E-02 | 1.83E-06 |
| 463.88962 | 61.57  | 14.28 | 17.32 | 16.56 | 16.62 | 5.34E-19 | 7.55E-14 | 1.48E-11 | 2.36E-11 | 8.75E-02 | 1.53E-01 | 9.98E-01 |
| 463.97903 | 53.34  | 22.08 | 23.71 | 23.39 | 22.57 | 1.91E-11 | 1.69E-10 | 2.48E-07 | 1.71E-01 | 5.32E-01 | 3.69E-05 | 5.19E-03 |
| 464.0308  | 76.58  | 16.44 | 19.87 | 19.16 | 19.13 | 3.95E-35 | 3.65E-14 | 4.54E-14 | 5.81E-14 | 1.98E-02 | 1.85E-02 | 9.99E-01 |
| 464.08114 | 278.51 | 16.54 | 22.68 | 22.53 | 20.87 | 2.90E-58 | 3.65E-14 | 3.65E-14 | 3.65E-14 | 9.60E-01 | 2.78E-07 | 2.42E-06 |
| 464.11735 | 71.99  | 13.82 | 13.85 | 13.21 | 12.65 | 1.32E-02 | 1.00E+00 | 4.15E-01 | 2.34E-02 | 3.96E-01 | 2.39E-02 | 5.33E-01 |
| 464.26204 | 48.43  | 13.63 | 13.99 | 15.24 | 13.70 | 2.47E-02 | 9.23E-01 | 2.68E-02 | 9.99E-01 | 1.52E-01 | 9.66E-01 | 5.77E-02 |
| 464.3132  | 27.34  | 19.03 | 18.33 | 18.41 | 18.28 | 4.66E-08 | 2.50E-06 | 2.98E-05 | 8.89E-07 | 9.41E-01 | 9.87E-01 | 8.09E-01 |
| 464.33677 | 23.26  | 18.62 | 18.90 | 18.35 | 18.28 | 1.78E-02 | 5.13E-01 | 5.46E-01 | 3.71E-01 | 4.47E-02 | 2.32E-02 | 9.88E-01 |
| 464.38184 | 216.13 | 15.34 | 8.40  | 9.10  | 9.35  | 1.05E-38 | 3.65E-14 | 3.65E-14 | 3.72E-14 | 4.76E-01 | 2.35E-01 | 9.58E-01 |
| 464.63684 | 48.47  | 19.47 | 19.77 | 19.77 | 19.21 | 1.62E-03 | 2.23E-01 | 2.09E-01 | 3.69E-01 | 1.00E+00 | 4.67E-03 | 4.04E-03 |
| 464.72697 | 45.97  | 18.74 | 19.98 | 20.01 | 19.63 | 9.85E-24 | 7.38E-14 | 6.85E-14 | 9.04E-11 | 9.95E-01 | 3.41E-02 | 1.64E-02 |
| 464.80824 | 33.14  | 16.07 | 14.95 | 15.71 | 15.96 | 4.60E-04 | 4.00E-04 | 5.64E-01 | 9.80E-01 | 3.69E-02 | 3.66E-03 | 8.32E-01 |
| 464.84755 | 50.3   | 18.90 | 19.79 | 20.18 | 19.25 | 1.19E-06 | 1.42E-03 | 1.19E-06 | 4.79E-01 | 4.05E-01 | 1.48E-01 | 1.76E-03 |

|           |        |       |       |       |       |          |          |          |          |          |          |          |
|-----------|--------|-------|-------|-------|-------|----------|----------|----------|----------|----------|----------|----------|
| 464.87885 | 29.01  | 14.95 | 18.33 | 17.92 | 17.75 | 2.17E-82 | 3.65E-14 | 3.65E-14 | 3.65E-14 | 4.27E-03 | 2.22E-05 | 4.65E-01 |
| 464.90058 | 40.83  | 14.19 | 16.60 | 16.71 | 15.83 | 6.75E-35 | 3.65E-14 | 3.65E-14 | 8.00E-14 | 9.27E-01 | 6.70E-04 | 5.02E-05 |
| 464.91111 | 52.13  | 13.87 | 12.60 | 14.48 | 14.40 | 2.29E-05 | 9.79E-03 | 4.09E-01 | 5.58E-01 | 4.56E-05 | 1.84E-04 | 9.98E-01 |
| 464.92495 | 38.4   | 11.51 | 16.68 | 16.37 | 16.88 | 2.31E-34 | 3.70E-14 | 3.92E-14 | 3.67E-14 | 8.78E-01 | 9.68E-01 | 6.34E-01 |
| 464.92669 | 156.64 | 13.60 | 17.25 | 17.43 | 16.15 | 1.90E-15 | 2.12E-12 | 1.85E-13 | 1.93E-06 | 9.81E-01 | 1.25E-01 | 4.91E-02 |
| 464.98196 | 54.36  | 18.27 | 19.58 | 19.27 | 18.60 | 1.11E-09 | 5.87E-09 | 9.44E-06 | 3.95E-01 | 4.60E-01 | 6.29E-05 | 1.11E-02 |
| 465.04486 | 198.62 | 15.98 | 13.17 | 14.28 | 15.83 | 2.98E-12 | 8.35E-11 | 1.14E-04 | 9.83E-01 | 3.32E-02 | 6.08E-09 | 1.23E-03 |
| 465.09904 | 57.41  | 16.46 | 17.50 | 16.96 | 17.95 | 3.62E-07 | 4.00E-04 | 2.05E-01 | 3.27E-07 | 1.70E-01 | 3.66E-01 | 1.86E-03 |
| 465.31658 | 27.03  | 16.58 | 13.87 | 14.24 | 14.90 | 2.14E-14 | 2.44E-13 | 1.08E-10 | 1.05E-05 | 6.92E-01 | 1.93E-02 | 2.36E-01 |
| 465.33988 | 23.33  | 16.49 | 16.52 | 15.89 | 15.67 | 1.11E-02 | 1.00E+00 | 1.74E-01 | 3.79E-02 | 1.62E-01 | 3.62E-02 | 8.96E-01 |
| 465.71564 | 48.36  | 17.06 | 12.35 | 12.73 | 13.14 | 1.77E-23 | 7.16E-14 | 7.35E-14 | 9.75E-14 | 8.44E-01 | 3.55E-01 | 8.26E-01 |
| 465.81169 | 47.98  | 15.58 | 13.60 | 12.26 | 12.72 | 2.26E-16 | 1.91E-06 | 7.36E-14 | 1.57E-11 | 3.74E-03 | 1.25E-01 | 6.65E-01 |
| 465.85121 | 51.57  | 16.63 | 16.88 | 17.24 | 16.50 | 5.03E-03 | 6.34E-01 | 2.06E-02 | 9.25E-01 | 3.51E-01 | 3.12E-01 | 5.15E-03 |
| 465.97469 | 53.13  | 19.16 | 20.63 | 20.40 | 19.82 | 6.16E-14 | 5.87E-13 | 5.64E-10 | 2.92E-03 | 6.28E-01 | 3.20E-04 | 1.69E-02 |
| 465.98274 | 296.83 | 10.85 | 13.54 | 13.31 | 11.15 | 8.38E-09 | 1.30E-06 | 9.43E-06 | 9.38E-01 | 9.69E-01 | 6.69E-05 | 3.54E-04 |
| 465.9831  | 53     | 15.42 | 16.39 | 16.03 | 14.92 | 2.78E-04 | 2.25E-02 | 2.65E-01 | 4.70E-01 | 7.21E-01 | 3.05E-04 | 1.04E-02 |
| 466.045   | 206.31 | 16.53 | 14.14 | 15.30 | 15.94 | 4.10E-07 | 1.49E-07 | 1.53E-02 | 5.02E-01 | 3.39E-02 | 3.29E-04 | 4.55E-01 |
| 466.05398 | 188.43 | 15.11 | 12.91 | 13.29 | 13.82 | 8.57E-07 | 1.02E-06 | 6.07E-05 | 1.21E-02 | 8.01E-01 | 1.53E-01 | 6.01E-01 |
| 466.06238 | 167.02 | 13.41 | 18.30 | 17.91 | 16.68 | 2.44E-41 | 3.65E-14 | 3.65E-14 | 7.25E-14 | 6.21E-01 | 9.88E-06 | 1.13E-03 |
| 466.08559 | 302.01 | 10.63 | 16.08 | 16.21 | 13.60 | 5.62E-46 | 3.65E-14 | 3.65E-14 | 8.25E-14 | 9.84E-01 | 2.12E-10 | 1.90E-11 |
| 466.08583 | 174.61 | 11.31 | 15.25 | 14.20 | 12.79 | 2.77E-17 | 7.47E-14 | 2.74E-10 | 4.08E-03 | 7.42E-02 | 5.75E-07 | 8.75E-03 |
| 466.10618 | 229.16 | 14.82 | 16.59 | 16.88 | 16.41 | 5.78E-16 | 2.92E-11 | 8.52E-14 | 5.28E-09 | 6.52E-01 | 9.00E-01 | 2.62E-01 |
| 466.10921 | 76.73  | 9.54  | 15.34 | 14.43 | 13.94 | 8.15E-31 | 3.65E-14 | 5.67E-14 | 7.47E-14 | 2.00E-01 | 1.77E-02 | 7.15E-01 |
| 466.13241 | 114.56 | 12.77 | 11.98 | 10.61 | 12.45 | 2.89E-16 | 6.03E-03 | 7.42E-14 | 5.52E-01 | 5.12E-07 | 2.55E-01 | 3.82E-11 |
| 466.32906 | 27.02  | 17.29 | 16.00 | 15.68 | 16.26 | 2.13E-09 | 2.35E-06 | 2.32E-09 | 3.87E-04 | 6.06E-01 | 7.50E-01 | 1.23E-01 |
| 466.35185 | 23.26  | 17.67 | 18.23 | 17.24 | 17.26 | 7.18E-05 | 6.77E-02 | 2.19E-01 | 2.88E-01 | 1.65E-04 | 4.05E-04 | 1.00E+00 |
| 466.58469 | 45.61  | 18.71 | 17.86 | 17.95 | 17.62 | 4.56E-10 | 1.31E-06 | 1.50E-05 | 9.88E-10 | 9.47E-01 | 4.71E-01 | 1.92E-01 |
| 466.60876 | 54.71  | 14.84 | 16.32 | 16.77 | 15.79 | 1.79E-12 | 7.32E-08 | 1.58E-12 | 1.70E-03 | 2.96E-01 | 1.80E-01 | 1.22E-03 |
| 466.63507 | 49.74  | 18.50 | 18.61 | 18.62 | 18.04 | 2.63E-03 | 9.08E-01 | 8.81E-01 | 3.04E-02 | 1.00E+00 | 5.72E-03 | 4.28E-03 |
| 466.72397 | 47.24  | 19.05 | 20.47 | 20.46 | 20.13 | 1.23E-23 | 7.28E-14 | 7.07E-14 | 4.72E-12 | 1.00E+00 | 9.50E-02 | 1.03E-01 |
| 466.7735  | 40.79  | 15.67 | 17.00 | 17.40 | 17.77 | 1.40E-08 | 6.33E-04 | 2.95E-06 | 3.28E-08 | 6.49E-01 | 1.36E-01 | 7.23E-01 |
| 466.81252 | 47.4   | 16.38 | 13.23 | 12.30 | 12.58 | 2.67E-20 | 1.49E-11 | 7.26E-14 | 7.80E-14 | 1.41E-01 | 4.72E-01 | 9.20E-01 |
| 466.84479 | 36.35  | 18.48 | 19.70 | 20.00 | 19.19 | 5.09E-10 | 1.22E-06 | 6.36E-10 | 1.30E-02 | 5.49E-01 | 1.58E-01 | 4.35E-03 |
| 466.88326 | 36.04  | 15.74 | 9.76  | 11.72 | 10.79 | 1.08E-30 | 3.65E-14 | 7.44E-14 | 6.58E-14 | 1.81E-04 | 1.38E-01 | 2.01E-01 |
| 466.93987 | 39.57  | 17.32 | 21.80 | 21.29 | 20.43 | 8.29E-69 | 3.65E-14 | 3.65E-14 | 3.65E-14 | 3.69E-02 | 1.36E-10 | 7.29E-05 |
| 467.0902  | 234.41 | 15.24 | 19.68 | 20.06 | 18.77 | 2.25E-27 | 6.41E-14 | 4.12E-14 | 1.20E-13 | 8.14E-01 | 1.60E-01 | 1.74E-02 |
| 467.09975 | 51.58  | 15.58 | 13.81 | 13.92 | 14.97 | 3.21E-06 | 2.49E-05 | 7.41E-05 | 3.88E-01 | 9.92E-01 | 2.02E-02 | 4.11E-02 |
| 467.12732 | 99.56  | 14.38 | 15.14 | 15.51 | 15.17 | 9.62E-06 | 3.99E-03 | 4.23E-06 | 3.58E-03 | 3.87E-01 | 9.99E-01 | 4.80E-01 |
| 467.27862 | 33.57  | 17.49 | 16.27 | 15.90 | 17.44 | 1.60E-08 | 2.78E-04 | 7.70E-07 | 9.98E-01 | 6.09E-01 | 1.31E-03 | 7.76E-06 |
| 467.35578 | 23.01  | 15.23 | 15.51 | 14.07 | 14.00 | 1.05E-06 | 8.10E-01 | 1.79E-03 | 1.26E-03 | 9.55E-05 | 7.06E-05 | 9.96E-01 |
| 467.71329 | 48.41  | 17.67 | 14.61 | 14.79 | 14.00 | 3.14E-11 | 9.32E-08 | 3.98E-07 | 3.87E-10 | 9.88E-01 | 6.82E-01 | 4.75E-01 |
| 467.8467  | 31.95  | 13.82 | 14.17 | 15.17 | 12.32 | 8.45E-08 | 8.48E-01 | 1.00E-02 | 5.23E-03 | 1.13E-01 | 4.72E-04 | 1.28E-08 |
| 467.92659 | 53.99  | 16.57 | 11.28 | 11.83 | 12.78 | 2.46E-65 | 3.65E-14 | 3.65E-14 | 3.65E-14 | 9.04E-02 | 1.47E-08 | 5.36E-04 |
| 467.94169 | 40.66  | 14.98 | 18.56 | 17.96 | 17.20 | 5.64E-60 | 3.65E-14 | 3.65E-14 | 3.65E-14 | 2.03E-03 | 6.15E-13 | 6.71E-05 |
| 468.01655 | 142.33 | 14.63 | 15.84 | 14.29 | 14.05 | 1.38E-07 | 4.51E-04 | 6.68E-01 | 2.37E-01 | 6.05E-06 | 3.24E-07 | 8.67E-01 |
| 468.07087 | 86.06  | 18.65 | 13.76 | 14.75 | 14.26 | 3.63E-26 | 4.76E-14 | 7.25E-14 | 7.41E-14 | 1.15E-01 | 6.86E-01 | 7.07E-01 |
| 468.09358 | 228.5  | 11.74 | 15.60 | 16.31 | 15.11 | 1.71E-49 | 3.65E-14 | 3.65E-14 | 3.65E-14 | 2.50E-02 | 2.42E-01 | 3.18E-05 |
| 468.12154 | 129.41 | 13.93 | 13.82 | 14.07 | 15.95 | 2.45E-07 | 9.92E-01 | 9.83E-01 | 3.18E-06 | 9.19E-01 | 1.84E-06 | 2.69E-05 |
| 468.30839 | 28.56  | 21.14 | 20.38 | 20.27 | 19.98 | 7.76E-12 | 7.74E-06 | 1.22E-07 | 1.21E-11 | 8.67E-01 | 5.84E-02 | 2.78E-01 |
| 468.36811 | 23.19  | 17.71 | 17.64 | 17.46 | 17.20 | 3.23E-01 | 9.96E-01 | 8.08E-01 | 2.98E-01 | 9.18E-01 | 4.48E-01 | 8.19E-01 |
| 468.5819  | 45.57  | 19.60 | 19.24 | 19.32 | 18.77 | 3.44E-04 | 2.03E-01 | 4.16E-01 | 9.15E-05 | 9.73E-01 | 7.58E-02 | 2.34E-02 |
| 468.63297 | 48     | 16.42 | 15.41 | 15.10 | 15.21 | 1.86E-05 | 3.18E-03 | 4.13E-05 | 4.03E-04 | 7.27E-01 | 9.23E-01 | 9.81E-01 |
| 468.72061 | 47.28  | 18.28 | 19.48 | 19.50 | 19.28 | 7.88E-21 | 7.43E-14 | 7.47E-14 | 7.26E-12 | 9.98E-01 | 4.62E-01 | 3.56E-01 |
| 468.76696 | 46.09  | 14.15 | 16.82 | 17.34 | 16.03 | 2.34E-37 | 3.67E-14 | 3.65E-14 | 8.08E-14 | 7.51E-02 | 2.63E-03 | 6.31E-08 |
| 468.7853  | 27.92  | 13.50 | 18.32 | 16.42 | 17.61 | 3.62E-37 | 3.65E-14 | 7.51E-14 | 3.70E-14 | 1.19E-07 | 1.49E-01 | 2.70E-03 |
| 468.80991 | 57.85  | 17.81 | 18.95 | 19.20 | 19.43 | 6.31E-25 | 3.65E-13 | 7.44E-14 | 5.36E-14 | 3.25E-01 | 7.72E-03 | 3.83E-01 |
| 468.84151 | 42.01  | 16.91 | 17.76 | 17.98 | 16.51 | 3.52E-07 | 1.08E-02 | 5.22E-04 | 4.84E-01 | 8.51E-01 | 1.31E-04 | 3.33E-06 |
| 468.93324 | 49.06  | 20.51 | 21.07 | 21.04 | 20.03 | 3.49E-07 | 1.67E-02 | 2.54E-02 | 7.75E-02 | 9.98E-01 | 3.33E-06 | 5.84E-06 |
| 468.95983 | 84.48  | 15.05 | 17.95 | 17.17 | 16.53 | 8.37E-22 | 5.96E-14 | 2.54E-13 | 6.90E-07 | 2.46E-02 | 5.36E-06 | 9.68E-02 |
| 469.0001  | 193.72 | 12.47 | 14.88 | 15.16 | 12.79 | 1.32E-12 | 6.19E-08 | 1.09E-09 | 8.61E-01 | 9.12E-01 | 1.32E-05 | 5.03E-07 |
| 469.04787 | 59.42  | 15.99 | 17.43 | 18.14 | 17.73 | 4.99E-12 | 7.31E-06 | 7.32E-12 | 9.01E-08 | 7.61E-02 | 7.57E-01 | 5.22E-01 |
| 469.0491  | 246.01 | 13.63 | 13.81 | 12.55 | 13.55 | 2.10E-02 | 9.76E-01 | 5.49E-02 | 9.98E-01 | 2.28E-02 | 9.41E-01 | 1.19E-01 |
| 469.07206 | 88.65  | 14.98 | 16.06 | 15.99 | 14.71 | 1.15E-02 | 1.13E-01 | 1.46E-01 | 9.47E-01 | 9.99E-01 | 4.18E-02 | 5.58E-02 |
| 469.08603 | 222.95 | 8.77  | 13.64 | 12.19 | 11.49 | 5.18E-17 | 7.58E-14 | 7.21E-10 | 2.81E-06 | 3.12E-02 | 5.66E-04 | 5.61E-01 |
| 469.12473 | 129.39 | 15.24 | 16.72 | 16.06 | 16.73 | 3.43E-09 | 6.85E-08 | 5.70E-03 | 1.13E-07 | 5.15E-02 | 1.00E+00 | 5.26E-02 |
| 469.22494 | 29.83  | 14.17 | 12.50 | 17.32 | 15.61 | 1.48E-27 | 5.53E-05 | 8.25E-14 | 1.03E-03 | 3.67E-14 | 5.63E-13 | 8.34E-05 |
| 469.28755 | 26.62  | 15.30 | 17.09 | 14.60 | 16.97 | 5.04E-16 | 1.35E-07 | 1.04E-01 | 1.92E-06 | 9.73E-13 | 9.83E-01 | 2.88E-11 |
| 469.31185 | 27.85  | 19.06 | 18.00 | 17.96 | 17.66 | 8.41E-15 | 5.65E-09 | 9.33E-10 | 1.75E-13 | 9.94E-01 | 2.17E-01 | 3.23E-01 |

|           |        |       |       |       |       |          |          |          |          |          |          |          |
|-----------|--------|-------|-------|-------|-------|----------|----------|----------|----------|----------|----------|----------|
| 469.37133 | 23     | 15.41 | 14.02 | 13.93 | 14.43 | 1.07E-03 | 4.26E-03 | 1.67E-03 | 9.00E-02 | 9.96E-01 | 7.82E-01 | 6.45E-01 |
| 469.71039 | 48.36  | 17.14 | 11.79 | 12.30 | 11.98 | 6.18E-21 | 7.51E-14 | 8.37E-14 | 7.54E-14 | 8.19E-01 | 9.89E-01 | 9.51E-01 |
| 469.80446 | 46.35  | 16.56 | 18.46 | 18.00 | 18.20 | 9.10E-31 | 3.65E-14 | 7.25E-14 | 6.18E-14 | 1.40E-02 | 3.44E-01 | 5.73E-01 |
| 469.93694 | 49.81  | 16.46 | 16.16 | 15.38 | 14.28 | 3.05E-07 | 8.59E-01 | 2.20E-02 | 3.33E-07 | 1.83E-01 | 2.63E-05 | 3.04E-02 |
| 470.00446 | 305.45 | 9.58  | 18.95 | 17.42 | 13.72 | 2.11E-49 | 3.65E-14 | 3.65E-14 | 4.48E-13 | 1.72E-02 | 7.45E-14 | 1.82E-10 |
| 470.03387 | 55.26  | 16.28 | 17.26 | 15.89 | 16.55 | 5.81E-05 | 3.32E-03 | 5.08E-01 | 7.82E-01 | 2.22E-05 | 8.45E-02 | 1.18E-01 |
| 470.1285  | 135.44 | 9.09  | 12.44 | 11.82 | 12.29 | 1.00E-11 | 4.34E-10 | 3.23E-07 | 6.47E-09 | 6.01E-01 | 9.91E-01 | 7.97E-01 |
| 470.25125 | 280.66 | 14.27 | 14.37 | 15.19 | 14.24 | 1.28E-01 | 9.96E-01 | 1.66E-01 | 1.00E+00 | 2.81E-01 | 9.93E-01 | 1.82E-01 |
| 470.32555 | 23.09  | 16.31 | 14.17 | 16.21 | 16.00 | 1.78E-10 | 1.81E-09 | 9.89E-01 | 7.84E-01 | 2.27E-08 | 1.50E-06 | 9.25E-01 |
| 470.38375 | 23.06  | 18.25 | 17.58 | 17.39 | 17.66 | 2.97E-04 | 6.68E-03 | 2.17E-04 | 2.81E-02 | 8.18E-01 | 9.82E-01 | 6.06E-01 |
| 470.39458 | 281.07 | 15.67 | 15.61 | 15.73 | 15.20 | 5.69E-01 | 9.99E-01 | 9.99E-01 | 6.35E-01 | 9.90E-01 | 7.48E-01 | 5.57E-01 |
| 470.57906 | 45.59  | 19.66 | 19.18 | 19.33 | 18.60 | 1.54E-05 | 8.36E-02 | 3.39E-01 | 3.46E-06 | 8.95E-01 | 3.34E-02 | 3.72E-03 |
| 470.67237 | 46.91  | 18.65 | 19.53 | 19.54 | 19.01 | 2.17E-13 | 9.39E-11 | 4.67E-11 | 2.46E-02 | 1.00E+00 | 5.92E-04 | 4.33E-04 |
| 470.72254 | 48.28  | 15.73 | 16.64 | 16.11 | 16.60 | 1.62E-04 | 4.56E-04 | 3.33E-01 | 1.41E-03 | 1.02E-01 | 9.98E-01 | 1.74E-01 |
| 470.76619 | 46.36  | 13.73 | 14.82 | 15.43 | 13.88 | 6.71E-13 | 2.71E-05 | 1.74E-11 | 9.27E-01 | 5.32E-02 | 9.16E-04 | 6.31E-09 |
| 470.80715 | 46.2   | 16.62 | 18.72 | 18.52 | 18.85 | 5.99E-31 | 4.19E-14 | 6.58E-14 | 3.85E-14 | 6.73E-01 | 9.13E-01 | 2.95E-01 |
| 470.85497 | 47.76  | 13.68 | 15.53 | 15.77 | 15.19 | 1.99E-10 | 8.72E-08 | 1.08E-09 | 3.10E-05 | 8.87E-01 | 7.31E-01 | 3.01E-01 |
| 470.9281  | 53.21  | 17.64 | 17.41 | 16.94 | 16.03 | 8.16E-07 | 8.53E-01 | 6.70E-02 | 6.11E-07 | 3.76E-01 | 4.63E-05 | 1.37E-02 |
| 470.96882 | 48.07  | 13.99 | 14.41 | 15.60 | 16.17 | 5.57E-10 | 6.01E-01 | 1.28E-05 | 7.40E-09 | 3.20E-03 | 7.65E-06 | 3.74E-01 |
| 471.03124 | 55.47  | 16.21 | 14.95 | 15.78 | 14.94 | 7.42E-04 | 3.02E-03 | 6.12E-01 | 3.84E-03 | 1.15E-01 | 1.00E+00 | 1.24E-01 |
| 471.05321 | 70.53  | 17.70 | 19.36 | 20.09 | 18.71 | 2.85E-17 | 1.65E-09 | 7.36E-14 | 7.72E-04 | 2.80E-02 | 6.57E-02 | 2.26E-06 |
| 471.07676 | 270.44 | 10.99 | 16.90 | 17.89 | 16.13 | 8.83E-50 | 3.65E-14 | 3.65E-14 | 3.65E-14 | 4.99E-02 | 2.05E-01 | 6.30E-05 |
| 471.30356 | 32.06  | 14.31 | 15.42 | 13.33 | 15.63 | 6.33E-09 | 1.64E-02 | 4.07E-02 | 3.42E-03 | 6.36E-07 | 9.47E-01 | 7.58E-08 |
| 471.3871  | 22.86  | 16.08 | 14.42 | 14.38 | 14.90 | 2.83E-09 | 1.07E-07 | 3.56E-08 | 4.26E-04 | 9.99E-01 | 3.78E-01 | 2.94E-01 |
| 471.53162 | 55.27  | 14.56 | 16.51 | 15.93 | 15.98 | 3.96E-11 | 3.30E-11 | 3.01E-06 | 3.04E-06 | 1.53E-01 | 2.45E-01 | 9.98E-01 |
| 471.57826 | 270.46 | 14.25 | 14.05 | 15.77 | 14.45 | 5.29E-08 | 9.03E-01 | 2.28E-06 | 9.18E-01 | 1.94E-07 | 5.85E-01 | 1.42E-04 |
| 471.79637 | 50.44  | 15.74 | 14.96 | 15.19 | 14.52 | 2.60E-02 | 1.97E-01 | 5.00E-01 | 1.44E-02 | 9.37E-01 | 7.11E-01 | 3.57E-01 |
| 471.80677 | 48.02  | 14.40 | 17.43 | 17.42 | 16.96 | 9.95E-48 | 3.65E-14 | 3.65E-14 | 3.65E-14 | 1.00E+00 | 7.37E-02 | 7.73E-02 |
| 471.96597 | 53.97  | 14.58 | 14.87 | 14.64 | 14.28 | 4.97E-01 | 8.49E-01 | 9.99E-01 | 8.48E-01 | 9.20E-01 | 4.06E-01 | 7.79E-01 |
| 472.0564  | 65.61  | 14.39 | 14.06 | 15.66 | 14.48 | 2.05E-05 | 7.49E-01 | 6.46E-04 | 9.93E-01 | 1.89E-05 | 6.24E-01 | 3.75E-03 |
| 472.08917 | 91.25  | 14.21 | 15.26 | 12.96 | 14.25 | 8.09E-16 | 9.88E-05 | 1.70E-06 | 9.98E-01 | 7.44E-14 | 5.34E-04 | 3.10E-06 |
| 472.21342 | 27.79  | 13.85 | 18.17 | 17.04 | 17.40 | 9.59E-56 | 3.65E-14 | 3.65E-14 | 3.65E-14 | 1.57E-06 | 3.34E-03 | 3.42E-01 |
| 472.34183 | 23.14  | 18.94 | 17.69 | 18.42 | 18.47 | 1.43E-05 | 2.66E-06 | 1.35E-01 | 2.36E-01 | 1.68E-02 | 1.23E-02 | 9.97E-01 |
| 472.57646 | 45.64  | 19.07 | 18.32 | 18.47 | 18.12 | 6.48E-07 | 8.83E-05 | 2.34E-03 | 7.62E-07 | 8.27E-01 | 6.83E-01 | 2.08E-01 |
| 472.66851 | 46.68  | 19.45 | 20.46 | 20.43 | 19.99 | 5.62E-15 | 9.42E-13 | 2.03E-12 | 2.69E-04 | 9.97E-01 | 4.17E-03 | 7.22E-03 |
| 472.80779 | 48.74  | 14.28 | 16.03 | 16.43 | 16.63 | 8.58E-19 | 2.40E-10 | 8.28E-14 | 7.51E-14 | 4.20E-01 | 1.18E-01 | 8.74E-01 |
| 472.84975 | 45.84  | 12.80 | 15.03 | 17.12 | 15.23 | 1.04E-40 | 7.43E-14 | 3.65E-14 | 7.23E-14 | 2.06E-13 | 8.79E-01 | 4.59E-01 |
| 472.98734 | 42.94  | 14.91 | 17.51 | 18.56 | 18.10 | 2.01E-36 | 7.07E-14 | 3.65E-14 | 3.72E-14 | 3.27E-04 | 1.17E-01 | 2.99E-01 |
| 473.11901 | 232.03 | 12.45 | 14.92 | 14.97 | 16.01 | 3.96E-12 | 9.90E-07 | 4.26E-07 | 4.91E-12 | 9.99E-01 | 1.09E-01 | 1.34E-01 |
| 473.16548 | 81.37  | 16.00 | 16.08 | 15.22 | 15.45 | 4.66E-02 | 9.96E-01 | 1.11E-01 | 4.20E-01 | 7.98E-02 | 3.29E-01 | 9.21E-01 |
| 473.17779 | 40.71  | 17.74 | 14.73 | 16.05 | 16.38 | 5.93E-20 | 6.58E-14 | 2.31E-08 | 2.07E-05 | 4.06E-05 | 4.10E-07 | 6.67E-01 |
| 473.1974  | 27.86  | 14.60 | 18.23 | 15.48 | 17.59 | 5.01E-37 | 3.65E-14 | 3.51E-03 | 4.63E-14 | 6.87E-14 | 8.10E-02 | 6.64E-13 |
| 473.31727 | 23.06  | 16.21 | 13.31 | 14.74 | 13.78 | 4.09E-26 | 3.94E-14 | 2.75E-08 | 7.43E-14 | 1.96E-07 | 2.64E-01 | 1.30E-03 |
| 473.34524 | 23.03  | 17.31 | 14.89 | 16.21 | 16.43 | 7.72E-16 | 7.52E-14 | 1.26E-04 | 5.19E-03 | 7.55E-06 | 3.22E-07 | 8.45E-01 |
| 473.77055 | 37.3   | 12.66 | 10.72 | 16.25 | 12.79 | 6.46E-13 | 1.82E-02 | 5.80E-07 | 9.98E-01 | 1.81E-13 | 1.73E-02 | 6.29E-06 |
| 473.80012 | 50.52  | 10.62 | 16.57 | 16.12 | 15.71 | 3.78E-58 | 3.65E-14 | 3.65E-14 | 3.65E-14 | 4.61E-01 | 3.22E-02 | 5.33E-01 |
| 473.87847 | 33.81  | 18.73 | 17.75 | 18.69 | 17.18 | 8.48E-10 | 6.75E-04 | 9.98E-01 | 3.15E-08 | 1.74E-03 | 1.30E-01 | 1.48E-07 |
| 473.90246 | 100.62 | 16.07 | 18.36 | 18.69 | 18.07 | 1.31E-28 | 6.72E-14 | 3.72E-14 | 7.47E-14 | 4.47E-01 | 5.75E-01 | 3.30E-02 |
| 473.94522 | 50.9   | 20.60 | 20.29 | 21.10 | 19.82 | 7.77E-11 | 2.49E-01 | 1.43E-02 | 4.28E-05 | 2.17E-05 | 3.74E-02 | 2.23E-01 |
| 474.04906 | 47.36  | 14.23 | 15.68 | 10.55 | 12.22 | 4.53E-52 | 2.01E-07 | 3.65E-14 | 1.71E-12 | 3.65E-14 | 3.65E-14 | 9.46E-09 |
| 474.064   | 58.3   | 14.45 | 14.75 | 15.96 | 15.46 | 1.16E-02 | 9.26E-01 | 1.11E-02 | 1.89E-01 | 7.82E-02 | 5.26E-01 | 7.61E-01 |
| 474.35728 | 22.18  | 17.96 | 17.03 | 17.39 | 16.78 | 3.72E-06 | 2.70E-04 | 5.19E-02 | 4.00E-06 | 3.99E-01 | 7.29E-01 | 5.20E-02 |
| 474.57374 | 45.67  | 17.81 | 16.58 | 16.65 | 16.36 | 1.03E-11 | 3.11E-08 | 1.70E-07 | 2.00E-10 | 9.83E-01 | 7.34E-01 | 5.04E-01 |
| 474.66653 | 46.86  | 19.03 | 19.97 | 19.98 | 19.43 | 1.57E-10 | 1.47E-08 | 8.99E-09 | 5.32E-02 | 1.00E+00 | 4.59E-03 | 3.76E-03 |
| 474.71117 | 45.71  | 16.02 | 16.53 | 16.95 | 15.89 | 1.28E-03 | 2.75E-01 | 6.03E-03 | 9.72E-01 | 4.77E-01 | 1.48E-01 | 2.65E-03 |
| 474.75464 | 46.67  | 18.91 | 19.91 | 19.97 | 19.73 | 9.60E-18 | 1.57E-13 | 7.37E-14 | 1.91E-09 | 9.53E-01 | 4.91E-01 | 2.15E-01 |
| 474.84869 | 45.77  | 15.62 | 15.61 | 16.06 | 15.56 | 4.94E-02 | 1.00E+00 | 1.03E-01 | 9.93E-01 | 1.14E-01 | 9.95E-01 | 7.45E-02 |
| 474.87332 | 33.16  | 17.99 | 18.63 | 19.23 | 17.61 | 3.28E-07 | 1.01E-01 | 6.93E-05 | 5.56E-01 | 1.60E-01 | 3.79E-03 | 5.87E-07 |
| 474.94529 | 52.69  | 16.71 | 14.25 | 15.56 | 14.13 | 4.09E-08 | 1.22E-06 | 5.87E-02 | 7.02E-07 | 2.88E-02 | 9.95E-01 | 1.73E-02 |
| 474.9854  | 46.12  | 15.73 | 15.30 | 16.88 | 15.38 | 1.68E-05 | 5.89E-01 | 3.31E-03 | 7.52E-01 | 4.19E-05 | 9.96E-01 | 1.76E-04 |
| 475.04497 | 278.44 | 15.61 | 17.15 | 16.96 | 17.54 | 2.66E-07 | 5.17E-05 | 4.58E-04 | 4.55E-07 | 9.45E-01 | 6.94E-01 | 3.56E-01 |
| 475.0661  | 69.9   | 19.05 | 20.12 | 20.97 | 20.40 | 2.42E-11 | 2.32E-04 | 6.45E-12 | 3.47E-06 | 8.03E-03 | 7.32E-01 | 1.56E-01 |
| 475.09204 | 84.63  | 12.56 | 15.76 | 15.24 | 14.28 | 2.32E-10 | 5.68E-10 | 1.72E-07 | 2.62E-03 | 7.05E-01 | 1.67E-02 | 2.07E-01 |
| 475.09507 | 228.95 | 11.46 | 17.12 | 17.59 | 16.48 | 1.03E-39 | 3.65E-14 | 3.65E-14 | 3.92E-14 | 6.70E-01 | 4.57E-01 | 5.01E-02 |
| 475.11002 | 92.27  | 15.91 | 18.52 | 18.90 | 17.35 | 9.84E-36 | 3.70E-14 | 3.65E-14 | 8.72E-10 | 2.82E-01 | 1.68E-06 | 1.08E-10 |
| 475.14467 | 268.03 | 15.55 | 14.48 | 13.98 | 14.43 | 3.08E-04 | 2.10E-02 | 1.61E-04 | 1.74E-02 | 5.60E-01 | 9.99E-01 | 6.66E-01 |
| 475.21313 | 27.62  | 14.79 | 18.47 | 16.87 | 17.99 | 8.89E-52 | 3.65E-14 | 5.58E-14 | 3.65E-14 | 1.64E-13 | 7.99E-02 | 3.31E-07 |
| 475.28392 | 28.54  | 15.18 | 17.81 | 10.57 | 10.44 | 1.61E-39 | 1.77E-06 | 7.52E-14 | 7.48E-14 | 3.65E-14 | 3.65E-14 | 9.95E-01 |

|           |        |       |       |       |       |          |          |          |          |          |          |          |
|-----------|--------|-------|-------|-------|-------|----------|----------|----------|----------|----------|----------|----------|
| 475.36108 | 22.82  | 16.04 | 13.54 | 14.47 | 13.75 | 2.82E-13 | 3.70E-12 | 1.41E-05 | 4.84E-10 | 2.94E-02 | 9.30E-01 | 1.54E-01 |
| 475.74613 | 32.45  | 17.44 | 19.15 | 18.88 | 18.74 | 6.80E-22 | 7.07E-14 | 7.41E-14 | 2.41E-12 | 3.99E-01 | 9.36E-02 | 8.43E-01 |
| 475.91345 | 55.3   | 11.87 | 11.25 | 13.06 | 12.97 | 4.27E-05 | 4.44E-01 | 2.36E-02 | 5.43E-02 | 2.03E-04 | 7.72E-04 | 9.97E-01 |
| 475.93723 | 52.36  | 18.70 | 18.15 | 18.93 | 17.58 | 4.69E-09 | 3.85E-02 | 6.79E-01 | 1.63E-06 | 1.51E-03 | 4.81E-02 | 1.32E-08 |
| 476.03352 | 86.91  | 16.23 | 20.18 | 20.99 | 19.48 | 8.79E-44 | 3.65E-14 | 3.65E-14 | 5.03E-14 | 2.44E-02 | 9.03E-02 | 3.41E-06 |
| 476.27293 | 57.02  | 15.62 | 16.63 | 16.83 | 16.23 | 2.02E-05 | 6.41E-04 | 2.04E-05 | 9.20E-02 | 8.70E-01 | 4.71E-01 | 1.25E-01 |
| 476.31032 | 25.07  | 19.57 | 19.41 | 18.49 | 18.82 | 1.42E-12 | 7.16E-01 | 2.80E-11 | 8.69E-06 | 3.80E-08 | 1.07E-03 | 1.69E-01 |
| 476.37329 | 22.83  | 17.46 | 14.86 | 16.07 | 15.64 | 3.26E-17 | 7.45E-14 | 2.89E-06 | 2.03E-09 | 1.04E-04 | 3.54E-02 | 4.16E-01 |
| 476.58476 | 242.01 | 14.27 | 14.05 | 15.45 | 14.54 | 7.34E-04 | 9.30E-01 | 4.07E-03 | 8.74E-01 | 7.22E-04 | 5.60E-01 | 6.41E-02 |
| 476.61737 | 47.96  | 18.24 | 18.64 | 18.56 | 17.66 | 3.46E-04 | 3.02E-01 | 4.97E-01 | 7.18E-02 | 9.86E-01 | 4.62E-04 | 1.45E-03 |
| 476.66109 | 46.24  | 16.02 | 17.14 | 17.26 | 16.61 | 5.12E-18 | 2.29E-13 | 7.49E-14 | 2.33E-04 | 8.23E-01 | 1.90E-03 | 6.01E-05 |
| 476.70917 | 45.86  | 14.96 | 15.35 | 15.61 | 14.09 | 1.61E-04 | 6.39E-01 | 1.91E-01 | 5.42E-02 | 8.63E-01 | 2.25E-03 | 1.04E-04 |
| 476.75208 | 45.14  | 19.16 | 20.19 | 20.24 | 20.02 | 1.25E-19 | 7.54E-14 | 7.52E-14 | 6.25E-11 | 9.77E-01 | 5.08E-01 | 2.78E-01 |
| 476.79868 | 46.63  | 13.71 | 15.63 | 16.67 | 15.31 | 5.83E-11 | 1.53E-05 | 9.22E-12 | 6.78E-04 | 5.64E-02 | 8.73E-01 | 7.37E-03 |
| 476.84373 | 32.83  | 16.53 | 16.10 | 16.34 | 16.22 | 1.38E-01 | 1.03E-01 | 7.12E-01 | 3.73E-01 | 6.22E-01 | 9.32E-01 | 9.40E-01 |
| 476.86901 | 29.14  | 17.38 | 17.71 | 18.34 | 16.95 | 9.96E-08 | 4.19E-01 | 9.46E-05 | 2.33E-01 | 3.09E-02 | 6.45E-03 | 4.46E-08 |
| 476.8914  | 46.52  | 14.49 | 12.04 | 13.49 | 12.87 | 6.05E-07 | 1.92E-07 | 8.57E-02 | 1.52E-03 | 6.07E-03 | 2.65E-01 | 5.11E-01 |
| 477.03201 | 86.72  | 13.49 | 17.44 | 18.30 | 16.18 | 1.45E-33 | 4.43E-14 | 3.65E-14 | 2.97E-12 | 6.54E-02 | 3.38E-03 | 6.93E-08 |
| 477.06672 | 64.51  | 18.77 | 19.31 | 19.75 | 19.03 | 4.13E-06 | 2.23E-02 | 1.54E-06 | 5.11E-01 | 9.51E-02 | 5.12E-01 | 1.76E-03 |
| 477.16144 | 68.56  | 14.81 | 15.12 | 13.19 | 15.60 | 4.63E-06 | 8.99E-01 | 2.14E-03 | 3.17E-01 | 2.56E-04 | 7.45E-01 | 4.71E-06 |
| 477.22882 | 29.9   | 14.46 | 18.07 | 16.55 | 17.33 | 3.83E-43 | 3.65E-14 | 7.29E-14 | 3.65E-14 | 9.17E-11 | 5.36E-03 | 2.44E-03 |
| 477.31687 | 26.08  | 14.70 | 15.86 | 14.15 | 15.10 | 1.02E-04 | 7.87E-03 | 4.29E-01 | 6.94E-01 | 3.92E-05 | 1.97E-01 | 6.25E-02 |
| 477.74902 | 43.86  | 16.62 | 19.00 | 19.19 | 18.62 | 3.55E-39 | 3.65E-14 | 3.65E-14 | 5.18E-14 | 7.08E-01 | 1.50E-01 | 8.99E-03 |
| 477.88055 | 86.72  | 14.96 | 17.51 | 17.17 | 16.93 | 1.33E-14 | 3.54E-13 | 1.28E-10 | 3.42E-08 | 7.23E-01 | 3.06E-01 | 8.83E-01 |
| 478.03097 | 84.64  | 12.39 | 16.80 | 17.65 | 15.94 | 1.38E-36 | 3.72E-14 | 3.65E-14 | 7.56E-14 | 9.09E-02 | 1.02E-01 | 4.14E-05 |
| 478.07325 | 63.33  | 14.46 | 12.96 | 14.43 | 12.58 | 4.30E-05 | 8.55E-03 | 1.00E+00 | 7.08E-04 | 1.28E-02 | 8.69E-01 | 1.20E-03 |
| 478.10749 | 185    | 12.20 | 13.60 | 12.26 | 14.64 | 5.63E-05 | 6.48E-02 | 1.00E+00 | 2.00E-04 | 9.46E-02 | 3.00E-01 | 4.29E-04 |
| 478.23576 | 91.44  | 10.88 | 16.00 | 15.03 | 15.21 | 3.23E-20 | 7.47E-14 | 4.40E-13 | 3.23E-13 | 2.67E-01 | 4.84E-01 | 9.87E-01 |
| 478.29267 | 27.91  | 19.50 | 19.26 | 19.19 | 18.91 | 3.35E-05 | 1.60E-01 | 4.02E-02 | 6.83E-06 | 9.48E-01 | 2.27E-02 | 8.59E-02 |
| 478.3291  | 36.17  | 20.74 | 22.18 | 21.62 | 21.81 | 2.84E-30 | 3.65E-14 | 1.20E-13 | 7.56E-14 | 2.88E-06 | 6.20E-03 | 3.09E-01 |
| 478.34187 | 35.3   | 15.20 | 13.32 | 13.67 | 14.37 | 6.05E-02 | 5.48E-02 | 1.59E-01 | 6.93E-01 | 9.66E-01 | 5.32E-01 | 8.02E-01 |
| 478.48701 | 97.22  | 9.02  | 15.22 | 14.88 | 14.32 | 9.38E-36 | 3.65E-14 | 3.65E-14 | 4.92E-14 | 8.89E-01 | 2.49E-01 | 6.44E-01 |
| 478.61441 | 47.85  | 19.47 | 19.91 | 19.87 | 19.21 | 5.91E-04 | 7.55E-02 | 1.15E-01 | 5.15E-01 | 9.97E-01 | 2.02E-03 | 3.57E-03 |
| 478.74527 | 264.38 | 14.92 | 17.56 | 19.77 | 17.27 | 1.23E-22 | 7.75E-09 | 4.19E-14 | 6.33E-07 | 3.31E-06 | 9.13E-01 | 2.35E-07 |
| 478.77969 | 45.98  | 14.58 | 13.50 | 14.46 | 13.98 | 6.06E-02 | 6.05E-02 | 9.92E-01 | 5.26E-01 | 1.33E-01 | 7.17E-01 | 7.15E-01 |
| 478.79646 | 49.39  | 14.81 | 16.69 | 17.51 | 16.33 | 3.80E-15 | 1.79E-08 | 7.54E-14 | 1.41E-05 | 4.77E-02 | 6.63E-01 | 1.56E-03 |
| 478.83558 | 38.27  | 17.88 | 18.44 | 18.79 | 18.79 | 3.64E-07 | 9.74E-03 | 2.24E-06 | 5.79E-06 | 1.97E-01 | 2.30E-01 | 1.00E+00 |
| 478.88224 | 45.75  | 14.99 | 16.30 | 17.24 | 16.44 | 4.47E-16 | 1.02E-06 | 7.45E-14 | 1.08E-07 | 1.13E-03 | 9.42E-01 | 1.09E-02 |
| 478.89958 | 274.71 | 14.01 | 15.34 | 15.43 | 15.00 | 1.36E-07 | 3.88E-06 | 6.42E-07 | 1.56E-03 | 9.90E-01 | 5.92E-01 | 3.97E-01 |
| 478.91214 | 274.13 | 16.38 | 18.22 | 20.40 | 18.10 | 8.99E-28 | 3.38E-08 | 3.65E-14 | 4.93E-07 | 1.33E-10 | 9.85E-01 | 4.57E-11 |
| 479.02136 | 43.08  | 15.10 | 15.88 | 15.76 | 16.65 | 1.15E-10 | 7.94E-04 | 6.16E-03 | 9.32E-12 | 9.33E-01 | 2.16E-03 | 2.10E-04 |
| 479.04746 | 90.47  | 15.19 | 14.03 | 14.57 | 13.87 | 3.95E-02 | 8.85E-02 | 5.79E-01 | 4.61E-02 | 7.10E-01 | 9.89E-01 | 5.28E-01 |
| 479.06263 | 59.85  | 13.82 | 13.34 | 14.29 | 13.86 | 1.87E-01 | 6.65E-01 | 6.58E-01 | 1.00E+00 | 1.19E-01 | 6.49E-01 | 7.51E-01 |
| 479.07902 | 272.26 | 14.68 | 18.03 | 19.98 | 18.28 | 1.58E-28 | 1.34E-13 | 3.65E-14 | 8.05E-14 | 2.48E-05 | 9.41E-01 | 4.46E-04 |
| 479.11125 | 188.51 | 10.43 | 16.13 | 15.09 | 15.04 | 1.78E-24 | 5.50E-14 | 7.47E-14 | 7.79E-14 | 2.00E-01 | 1.91E-01 | 1.00E+00 |
| 479.13249 | 79.51  | 16.10 | 17.27 | 15.83 | 16.06 | 2.47E-09 | 1.81E-06 | 5.92E-01 | 9.97E-01 | 6.39E-09 | 2.90E-06 | 7.57E-01 |
| 479.24636 | 266.2  | 16.23 | 17.01 | 18.98 | 16.72 | 2.11E-19 | 2.43E-02 | 7.45E-14 | 2.98E-01 | 1.86E-10 | 7.53E-01 | 1.31E-12 |
| 479.29595 | 31.58  | 17.20 | 16.33 | 16.43 | 16.46 | 2.39E-02 | 3.32E-02 | 6.83E-02 | 1.07E-01 | 9.91E-01 | 9.80E-01 | 1.00E+00 |
| 479.33205 | 30.77  | 18.95 | 20.04 | 19.35 | 19.61 | 1.38E-16 | 7.32E-14 | 3.30E-03 | 4.61E-07 | 8.56E-08 | 2.48E-03 | 1.42E-01 |
| 479.35914 | 27     | 16.46 | 18.64 | 18.73 | 17.95 | 1.06E-15 | 1.02E-12 | 1.61E-13 | 2.34E-06 | 9.90E-01 | 8.74E-02 | 3.97E-02 |
| 479.41341 | 257.48 | 13.19 | 15.71 | 17.35 | 15.20 | 6.63E-14 | 2.67E-06 | 8.14E-14 | 4.10E-04 | 6.10E-03 | 7.57E-01 | 2.10E-04 |
| 479.58053 | 257.17 | 14.30 | 13.91 | 15.61 | 14.68 | 1.43E-06 | 5.83E-01 | 1.30E-04 | 6.23E-01 | 8.74E-07 | 8.61E-02 | 2.07E-02 |
| 479.74641 | 45.74  | 13.04 | 18.42 | 18.58 | 17.76 | 6.11E-53 | 3.65E-14 | 3.65E-14 | 3.65E-14 | 9.49E-01 | 1.79E-01 | 5.11E-02 |
| 479.83258 | 50.17  | 17.00 | 17.87 | 18.20 | 17.69 | 5.80E-09 | 2.74E-05 | 2.07E-09 | 1.86E-03 | 2.89E-01 | 8.05E-01 | 4.40E-02 |
| 479.95285 | 52.06  | 21.89 | 23.15 | 23.31 | 22.23 | 2.83E-13 | 5.95E-09 | 4.70E-11 | 3.40E-01 | 8.74E-01 | 9.55E-05 | 2.92E-06 |
| 480.1138  | 62.78  | 14.28 | 15.53 | 15.34 | 15.01 | 3.14E-04 | 3.39E-04 | 2.90E-03 | 9.23E-02 | 9.34E-01 | 3.79E-01 | 7.28E-01 |
| 480.30844 | 26.77  | 20.47 | 20.08 | 19.92 | 19.40 | 4.27E-09 | 5.62E-02 | 2.13E-03 | 5.59E-10 | 7.44E-01 | 2.30E-04 | 7.33E-03 |
| 480.34472 | 26.85  | 20.20 | 20.06 | 19.85 | 19.65 | 1.38E-02 | 8.47E-01 | 1.77E-01 | 1.05E-02 | 6.43E-01 | 1.09E-01 | 6.66E-01 |
| 480.40439 | 22.69  | 16.47 | 11.37 | 12.51 | 13.21 | 4.07E-35 | 3.65E-14 | 4.34E-14 | 7.36E-14 | 7.68E-03 | 5.53E-06 | 2.15E-01 |
| 480.61186 | 48.33  | 19.39 | 19.79 | 19.73 | 19.09 | 9.18E-04 | 1.17E-01 | 2.29E-01 | 3.80E-01 | 9.86E-01 | 1.76E-03 | 5.02E-03 |
| 480.70096 | 46.82  | 18.18 | 19.86 | 19.90 | 19.41 | 5.01E-20 | 7.41E-14 | 7.36E-14 | 2.28E-09 | 9.96E-01 | 1.04E-01 | 5.90E-02 |
| 480.7934  | 44.19  | 16.25 | 13.86 | 13.79 | 14.40 | 8.08E-11 | 7.86E-09 | 2.02E-09 | 1.99E-05 | 9.98E-01 | 5.26E-01 | 4.12E-01 |
| 480.82159 | 50.17  | 18.85 | 17.74 | 17.82 | 16.76 | 1.74E-06 | 1.22E-02 | 2.15E-02 | 2.72E-07 | 9.97E-01 | 5.14E-02 | 2.78E-02 |
| 480.8467  | 28.56  | 17.21 | 17.05 | 17.70 | 17.59 | 1.07E-02 | 8.70E-01 | 1.02E-01 | 3.12E-01 | 1.74E-02 | 8.06E-02 | 9.64E-01 |
| 480.88497 | 48.82  | 13.98 | 13.62 | 15.00 | 14.50 | 1.75E-03 | 7.47E-01 | 2.53E-02 | 4.99E-01 | 1.40E-03 | 9.94E-02 | 5.59E-01 |
| 480.91837 | 41.29  | 10.89 | 15.01 | 12.73 | 13.01 | 1.01E-13 | 8.07E-14 | 7.27E-04 | 1.28E-04 | 2.71E-05 | 5.14E-04 | 9.44E-01 |
| 480.958   | 143.24 | 11.59 | 14.75 | 16.05 | 14.68 | 1.79E-25 | 9.11E-14 | 3.85E-14 | 2.94E-13 | 4.33E-03 | 9.98E-01 | 2.99E-03 |
| 481.0824  | 66.48  | 17.27 | 17.63 | 16.83 | 16.54 | 3.48E-05 | 3.76E-01 | 1.95E-01 | 8.94E-03 | 3.21E-03 | 4.10E-05 | 6.05E-01 |

|           |        |       |       |       |       |          |          |          |          |          |          |          |
|-----------|--------|-------|-------|-------|-------|----------|----------|----------|----------|----------|----------|----------|
| 481.0964  | 195.91 | 11.66 | 13.87 | 15.30 | 12.43 | 3.75E-15 | 2.67E-06 | 8.12E-14 | 2.89E-01 | 7.02E-03 | 8.66E-03 | 5.44E-09 |
| 481.22485 | 29.78  | 14.80 | 13.54 | 17.81 | 17.22 | 1.52E-32 | 6.13E-04 | 7.33E-14 | 2.34E-11 | 3.65E-14 | 6.36E-14 | 2.97E-01 |
| 481.31168 | 27.22  | 18.30 | 17.56 | 17.57 | 17.38 | 2.59E-08 | 1.83E-05 | 1.82E-05 | 1.01E-07 | 1.00E+00 | 6.55E-01 | 6.23E-01 |
| 481.34825 | 27.21  | 18.19 | 17.73 | 17.52 | 17.37 | 7.23E-05 | 5.13E-02 | 1.17E-03 | 8.45E-05 | 6.69E-01 | 2.46E-01 | 8.65E-01 |
| 481.69002 | 47.02  | 15.79 | 8.05  | 8.57  | 9.69  | 4.86E-58 | 3.65E-14 | 3.65E-14 | 3.65E-14 | 5.42E-01 | 3.73E-04 | 2.78E-02 |
| 481.72692 | 30.05  | 14.36 | 11.84 | 16.20 | 15.38 | 4.37E-26 | 4.58E-11 | 1.48E-06 | 2.50E-02 | 3.76E-14 | 7.36E-14 | 1.15E-01 |
| 481.74408 | 49.6   | 14.65 | 16.52 | 16.67 | 15.92 | 4.55E-23 | 7.47E-14 | 6.81E-14 | 4.30E-09 | 8.67E-01 | 1.83E-02 | 1.39E-03 |
| 481.78805 | 46.3   | 16.51 | 12.07 | 11.77 | 12.73 | 1.65E-30 | 4.43E-14 | 3.70E-14 | 7.49E-14 | 8.65E-01 | 3.68E-01 | 8.13E-02 |
| 481.82582 | 50.5   | 15.32 | 12.96 | 12.98 | 12.75 | 4.28E-09 | 1.14E-06 | 1.07E-06 | 2.04E-07 | 1.00E+00 | 9.66E-01 | 9.58E-01 |
| 481.83699 | 35.77  | 14.83 | 17.76 | 18.06 | 17.11 | 1.69E-41 | 3.65E-14 | 3.65E-14 | 6.03E-14 | 4.84E-01 | 1.68E-02 | 1.01E-04 |
| 481.9483  | 51.52  | 19.43 | 20.53 | 20.79 | 19.73 | 8.07E-15 | 7.08E-09 | 5.99E-13 | 3.32E-01 | 4.40E-01 | 1.15E-04 | 9.86E-08 |
| 482.10205 | 240.04 | 14.22 | 15.19 | 15.40 | 13.80 | 3.17E-06 | 1.59E-02 | 1.64E-03 | 6.00E-01 | 9.21E-01 | 4.30E-04 | 2.82E-05 |
| 482.10727 | 84.16  | 16.32 | 14.54 | 13.93 | 14.85 | 6.14E-05 | 3.76E-03 | 3.08E-05 | 2.99E-02 | 6.58E-01 | 9.43E-01 | 3.32E-01 |
| 482.19838 | 153.68 | 17.50 | 19.29 | 18.79 | 18.75 | 1.65E-21 | 6.41E-14 | 1.06E-12 | 2.12E-11 | 1.95E-02 | 1.35E-02 | 9.96E-01 |
| 482.19843 | 283.2  | 11.88 | 13.35 | 13.33 | 12.10 | 1.26E-03 | 9.26E-03 | 9.54E-03 | 9.66E-01 | 1.00E+00 | 5.60E-02 | 5.83E-02 |
| 482.23272 | 30.24  | 13.05 | 12.71 | 15.30 | 14.78 | 1.87E-08 | 8.87E-01 | 1.01E-05 | 1.83E-03 | 7.46E-07 | 2.03E-04 | 7.09E-01 |
| 482.32402 | 26.16  | 20.83 | 20.43 | 20.28 | 19.88 | 5.05E-09 | 1.88E-02 | 4.84E-04 | 7.57E-10 | 7.48E-01 | 1.21E-03 | 2.67E-02 |
| 482.36051 | 27.89  | 20.14 | 20.15 | 19.94 | 19.68 | 6.94E-02 | 1.00E+00 | 7.03E-01 | 8.64E-02 | 6.97E-01 | 9.26E-02 | 5.66E-01 |
| 482.42005 | 22.63  | 16.51 | 10.26 | 11.92 | 12.76 | 4.19E-33 | 3.65E-14 | 6.58E-14 | 1.00E-13 | 1.29E-03 | 7.63E-07 | 2.53E-01 |
| 482.52195 | 54.4   | 15.62 | 17.50 | 16.99 | 16.49 | 8.68E-17 | 7.52E-14 | 4.48E-10 | 2.32E-04 | 6.20E-02 | 2.06E-05 | 8.83E-02 |
| 482.55817 | 45.07  | 19.63 | 16.71 | 16.47 | 16.52 | 1.50E-18 | 6.37E-13 | 7.96E-14 | 1.52E-13 | 9.16E-01 | 9.57E-01 | 9.99E-01 |
| 482.60932 | 48.52  | 18.47 | 18.77 | 18.70 | 18.16 | 2.85E-03 | 2.69E-01 | 5.19E-01 | 2.52E-01 | 9.71E-01 | 3.04E-03 | 1.15E-02 |
| 482.69837 | 46.88  | 18.98 | 20.44 | 20.45 | 20.00 | 2.06E-28 | 4.39E-14 | 4.19E-14 | 1.00E-12 | 1.00E+00 | 5.54E-03 | 4.63E-03 |
| 482.74292 | 42.24  | 15.80 | 17.26 | 17.24 | 16.12 | 1.37E-06 | 4.70E-05 | 5.19E-05 | 7.54E-01 | 1.00E+00 | 5.08E-03 | 5.69E-03 |
| 482.81867 | 49.85  | 18.59 | 17.69 | 17.79 | 16.51 | 1.10E-06 | 5.46E-02 | 1.04E-01 | 1.51E-07 | 9.92E-01 | 8.78E-03 | 3.24E-03 |
| 482.9341  | 41.11  | 12.46 | 17.97 | 18.71 | 15.85 | 1.08E-52 | 3.65E-14 | 3.65E-14 | 7.29E-14 | 1.13E-01 | 1.60E-08 | 9.96E-14 |
| 482.95275 | 51.85  | 12.07 | 13.83 | 13.42 | 12.46 | 2.63E-02 | 3.21E-02 | 1.43E-01 | 9.32E-01 | 9.27E-01 | 1.84E-01 | 4.79E-01 |
| 483.07623 | 41.62  | 14.98 | 14.32 | 13.18 | 14.73 | 9.16E-04 | 4.75E-01 | 6.29E-04 | 9.48E-01 | 7.95E-02 | 8.38E-01 | 8.89E-03 |
| 483.09009 | 69.39  | 15.46 | 13.58 | 16.71 | 14.36 | 1.49E-11 | 5.26E-05 | 1.30E-02 | 4.85E-02 | 1.65E-11 | 2.88E-01 | 8.69E-07 |
| 483.20127 | 149.81 | 14.43 | 16.13 | 15.24 | 15.66 | 2.83E-13 | 2.03E-13 | 6.27E-04 | 1.56E-07 | 2.41E-04 | 1.45E-01 | 2.20E-01 |
| 483.32746 | 27.25  | 18.58 | 18.17 | 17.99 | 17.86 | 5.12E-11 | 3.60E-04 | 5.39E-08 | 1.74E-10 | 2.79E-01 | 1.91E-02 | 6.21E-01 |
| 483.36383 | 27.74  | 18.19 | 17.77 | 17.59 | 17.35 | 9.77E-04 | 1.67E-01 | 1.84E-02 | 5.59E-04 | 8.39E-01 | 2.33E-01 | 6.90E-01 |
| 483.51911 | 72.22  | 14.73 | 15.02 | 14.21 | 14.41 | 1.20E-01 | 8.38E-01 | 4.27E-01 | 8.01E-01 | 1.04E-01 | 3.43E-01 | 9.47E-01 |
| 483.68729 | 47.88  | 17.08 | 11.35 | 11.63 | 12.97 | 3.26E-46 | 3.65E-14 | 3.65E-14 | 4.14E-14 | 8.48E-01 | 5.88E-05 | 1.21E-03 |
| 483.83216 | 38.78  | 14.25 | 15.61 | 15.72 | 15.39 | 5.23E-11 | 1.80E-08 | 7.50E-10 | 5.33E-06 | 9.60E-01 | 7.85E-01 | 4.82E-01 |
| 483.94591 | 52.56  | 15.04 | 15.64 | 15.25 | 14.54 | 1.39E-02 | 2.26E-01 | 9.09E-01 | 4.30E-01 | 6.14E-01 | 6.68E-03 | 1.53E-01 |
| 483.99407 | 244.38 | 15.13 | 15.52 | 13.70 | 14.70 | 1.74E-02 | 9.06E-01 | 6.35E-02 | 8.92E-01 | 1.26E-02 | 5.45E-01 | 3.49E-01 |
| 484.08256 | 85.74  | 14.10 | 17.07 | 15.72 | 16.15 | 3.20E-20 | 6.76E-14 | 9.76E-08 | 7.16E-11 | 2.37E-05 | 1.09E-02 | 4.61E-01 |
| 484.11672 | 237.28 | 21.28 | 24.63 | 24.79 | 23.75 | 7.91E-26 | 6.85E-14 | 5.23E-14 | 3.69E-12 | 9.60E-01 | 4.63E-02 | 1.08E-02 |
| 484.14277 | 90.68  | 14.52 | 15.42 | 14.52 | 15.01 | 9.12E-02 | 1.21E-01 | 1.00E+00 | 6.43E-01 | 1.31E-01 | 7.74E-01 | 6.49E-01 |
| 484.27682 | 61.58  | 16.96 | 19.40 | 19.04 | 18.29 | 8.58E-33 | 3.65E-14 | 4.14E-14 | 3.59E-11 | 1.85E-01 | 6.65E-08 | 4.58E-04 |
| 484.55589 | 44.97  | 20.88 | 18.40 | 18.16 | 18.04 | 1.07E-18 | 1.97E-12 | 8.43E-14 | 8.28E-14 | 8.86E-01 | 7.17E-01 | 9.85E-01 |
| 484.60755 | 46.82  | 15.43 | 16.41 | 15.95 | 15.74 | 2.23E-02 | 1.15E-02 | 3.40E-01 | 7.68E-01 | 4.93E-01 | 1.93E-01 | 9.21E-01 |
| 484.69493 | 46.8   | 18.25 | 19.66 | 19.68 | 19.23 | 1.11E-27 | 4.90E-14 | 4.43E-14 | 3.73E-12 | 9.99E-01 | 5.83E-03 | 3.62E-03 |
| 484.74059 | 45.84  | 14.90 | 17.43 | 17.82 | 16.74 | 3.54E-24 | 7.45E-14 | 5.25E-14 | 4.58E-10 | 4.61E-01 | 6.88E-02 | 7.04E-04 |
| 484.78362 | 47.76  | 18.05 | 19.40 | 19.49 | 19.44 | 1.06E-25 | 7.36E-14 | 6.72E-14 | 7.54E-14 | 9.12E-01 | 9.87E-01 | 9.90E-01 |
| 484.8159  | 50.02  | 16.71 | 14.40 | 14.44 | 13.30 | 3.39E-08 | 1.55E-04 | 1.88E-04 | 1.88E-08 | 1.00E+00 | 2.18E-01 | 1.80E-01 |
| 484.8634  | 123.3  | 11.01 | 13.15 | 9.89  | 12.96 | 1.90E-09 | 4.67E-04 | 1.50E-01 | 2.47E-03 | 5.51E-08 | 9.87E-01 | 6.58E-07 |
| 484.90522 | 53.4   | 19.32 | 18.66 | 19.50 | 17.95 | 5.23E-08 | 5.20E-02 | 9.07E-01 | 2.67E-06 | 9.51E-03 | 4.70E-02 | 2.04E-07 |
| 484.93734 | 113.85 | 10.82 | 13.90 | 10.95 | 12.49 | 3.28E-11 | 5.74E-10 | 9.91E-01 | 2.18E-03 | 6.99E-09 | 1.95E-02 | 7.34E-03 |
| 484.97795 | 281.88 | 16.45 | 18.89 | 18.99 | 18.36 | 2.21E-11 | 3.59E-09 | 5.75E-10 | 8.74E-06 | 9.94E-01 | 5.52E-01 | 3.94E-01 |
| 484.99764 | 143.85 | 9.92  | 13.22 | 11.87 | 11.77 | 2.94E-07 | 4.95E-08 | 2.42E-03 | 6.66E-03 | 8.09E-02 | 6.51E-02 | 9.98E-01 |
| 485.01467 | 257.13 | 17.27 | 17.51 | 17.59 | 17.10 | 5.78E-02 | 5.76E-01 | 3.19E-01 | 8.14E-01 | 9.77E-01 | 1.68E-01 | 6.60E-02 |
| 485.04415 | 72.77  | 17.08 | 10.01 | 13.22 | 12.77 | 1.17E-27 | 3.65E-14 | 3.13E-11 | 1.09E-12 | 1.05E-07 | 1.27E-05 | 8.56E-01 |
| 485.07143 | 65.14  | 14.28 | 16.74 | 16.89 | 16.54 | 3.94E-16 | 3.20E-12 | 1.73E-13 | 3.91E-10 | 9.67E-01 | 9.34E-01 | 7.20E-01 |
| 485.12047 | 236.56 | 18.40 | 21.52 | 22.19 | 20.80 | 5.52E-25 | 7.48E-14 | 4.30E-14 | 8.89E-11 | 1.94E-01 | 1.64E-01 | 4.33E-04 |
| 485.12058 | 125.61 | 14.03 | 15.92 | 15.43 | 16.77 | 1.95E-10 | 5.35E-06 | 1.17E-03 | 7.50E-11 | 5.74E-01 | 1.39E-01 | 4.03E-03 |
| 485.28091 | 54.94  | 15.76 | 16.75 | 16.27 | 15.57 | 1.33E-04 | 1.47E-03 | 2.15E-01 | 9.03E-01 | 3.00E-01 | 2.55E-04 | 6.31E-02 |
| 485.6843  | 47.68  | 16.18 | 10.25 | 10.93 | 11.71 | 4.00E-57 | 3.65E-14 | 3.65E-14 | 3.65E-14 | 1.04E-01 | 1.96E-05 | 5.07E-02 |
| 485.78348 | 49.01  | 14.90 | 17.94 | 18.11 | 17.20 | 1.31E-48 | 3.65E-14 | 3.65E-14 | 3.74E-14 | 7.87E-01 | 1.05E-03 | 2.19E-05 |
| 485.96091 | 64.81  | 15.50 | 15.44 | 14.26 | 13.35 | 1.13E-07 | 9.99E-01 | 8.28E-03 | 1.00E-06 | 1.74E-02 | 4.18E-06 | 1.12E-01 |
| 485.98235 | 182.08 | 12.46 | 14.69 | 15.31 | 13.66 | 1.23E-05 | 1.02E-03 | 1.03E-05 | 1.90E-01 | 7.31E-01 | 3.48E-01 | 3.93E-02 |
| 486.01278 | 57.25  | 17.97 | 16.63 | 17.28 | 16.00 | 9.77E-06 | 2.88E-03 | 2.62E-01 | 6.20E-06 | 3.42E-01 | 4.15E-01 | 8.96E-03 |
| 486.06325 | 168.68 | 7.67  | 13.31 | 12.65 | 8.91  | 3.15E-31 | 3.76E-14 | 6.21E-14 | 4.75E-02 | 5.16E-01 | 7.52E-14 | 2.51E-12 |
| 486.08673 | 89.08  | 14.25 | 15.67 | 14.52 | 15.87 | 6.42E-07 | 1.37E-04 | 8.31E-01 | 1.70E-05 | 4.45E-03 | 9.39E-01 | 7.47E-04 |
| 486.11257 | 233.56 | 17.11 | 20.85 | 21.20 | 19.94 | 2.73E-30 | 4.56E-14 | 3.67E-14 | 9.20E-14 | 7.23E-01 | 4.37E-02 | 1.65E-03 |
| 486.29237 | 27.43  | 14.81 | 17.65 | 15.20 | 16.49 | 4.26E-16 | 8.14E-14 | 6.26E-01 | 6.29E-06 | 3.09E-11 | 5.79E-03 | 1.18E-03 |
| 486.55313 | 44.97  | 20.83 | 18.42 | 18.27 | 17.75 | 2.18E-12 | 1.04E-07 | 1.10E-08 | 3.88E-11 | 9.85E-01 | 4.32E-01 | 6.41E-01 |

|           |        |       |       |       |       |          |          |          |          |          |          |          |
|-----------|--------|-------|-------|-------|-------|----------|----------|----------|----------|----------|----------|----------|
| 486.64751 | 46.9   | 18.36 | 19.40 | 19.34 | 18.76 | 9.99E-12 | 5.43E-10 | 4.36E-09 | 5.12E-02 | 9.75E-01 | 6.48E-04 | 2.58E-03 |
| 486.69367 | 47.07  | 15.96 | 17.69 | 17.61 | 17.21 | 7.83E-17 | 9.13E-14 | 1.77E-13 | 5.21E-08 | 9.84E-01 | 1.14E-01 | 2.27E-01 |
| 486.73778 | 45.85  | 12.81 | 15.01 | 15.59 | 13.84 | 2.70E-09 | 6.16E-06 | 5.15E-09 | 1.02E-01 | 5.67E-01 | 5.93E-02 | 1.04E-03 |
| 486.78089 | 47.15  | 17.39 | 19.31 | 19.68 | 19.33 | 1.51E-43 | 3.65E-14 | 3.65E-14 | 3.65E-14 | 5.11E-02 | 9.99E-01 | 8.26E-02 |
| 486.82821 | 47.28  | 13.42 | 15.05 | 15.86 | 15.07 | 3.51E-10 | 2.78E-05 | 1.18E-10 | 3.64E-05 | 1.11E-01 | 1.00E+00 | 1.42E-01 |
| 486.88345 | 20.77  | 15.52 | 17.17 | 17.45 | 16.54 | 7.61E-23 | 7.45E-14 | 6.34E-14 | 5.49E-07 | 4.40E-01 | 5.31E-03 | 1.48E-05 |
| 486.90375 | 51.89  | 16.98 | 15.95 | 16.09 | 14.62 | 2.25E-09 | 1.07E-02 | 3.66E-02 | 2.11E-10 | 9.72E-01 | 1.05E-03 | 1.74E-04 |
| 486.91978 | 44.71  | 14.05 | 12.77 | 14.31 | 13.91 | 6.42E-03 | 2.50E-02 | 9.40E-01 | 9.90E-01 | 5.56E-03 | 8.18E-02 | 8.36E-01 |
| 486.95855 | 73.74  | 14.24 | 15.96 | 14.76 | 14.35 | 3.38E-08 | 6.80E-08 | 2.69E-01 | 9.83E-01 | 4.31E-04 | 2.13E-06 | 5.29E-01 |
| 487.02617 | 59.04  | 16.75 | 15.50 | 16.80 | 17.31 | 1.10E-10 | 2.54E-06 | 9.96E-01 | 1.02E-01 | 1.60E-06 | 7.51E-11 | 1.79E-01 |
| 487.06457 | 256.76 | 10.47 | 14.18 | 10.53 | 11.00 | 1.68E-08 | 1.41E-07 | 1.00E+00 | 8.53E-01 | 4.45E-07 | 2.78E-05 | 8.98E-01 |
| 487.08972 | 88.95  | 14.17 | 15.72 | 12.97 | 14.94 | 2.15E-09 | 7.84E-04 | 1.46E-02 | 2.40E-01 | 9.26E-10 | 2.55E-01 | 2.81E-05 |
| 487.10013 | 87.48  | 15.26 | 18.28 | 17.88 | 17.15 | 1.68E-50 | 3.65E-14 | 3.65E-14 | 4.59E-14 | 7.18E-02 | 9.66E-10 | 1.06E-04 |
| 487.116   | 236.22 | 13.59 | 18.09 | 18.39 | 16.98 | 3.41E-31 | 3.92E-14 | 3.67E-14 | 7.69E-14 | 8.72E-01 | 2.89E-02 | 2.55E-03 |
| 487.16583 | 139.27 | 8.82  | 12.66 | 13.10 | 11.20 | 2.70E-10 | 7.21E-08 | 1.34E-09 | 2.44E-03 | 9.15E-01 | 1.47E-01 | 2.95E-02 |
| 487.19887 | 77.55  | 15.15 | 14.89 | 15.71 | 15.02 | 8.82E-02 | 8.55E-01 | 3.26E-01 | 9.81E-01 | 7.53E-02 | 9.80E-01 | 2.00E-01 |
| 487.21352 | 189.1  | 15.44 | 18.07 | 16.30 | 17.41 | 6.90E-18 | 7.45E-14 | 1.11E-02 | 3.72E-10 | 1.84E-08 | 1.19E-01 | 1.15E-03 |
| 487.77743 | 49.81  | 15.02 | 18.41 | 18.60 | 17.86 | 2.52E-42 | 3.65E-14 | 3.65E-14 | 3.87E-14 | 8.56E-01 | 1.05E-01 | 1.23E-02 |
| 488.07489 | 231.58 | 7.95  | 15.26 | 16.05 | 13.91 | 2.45E-60 | 3.65E-14 | 3.65E-14 | 3.65E-14 | 1.78E-01 | 4.55E-03 | 9.90E-07 |
| 488.20085 | 99.36  | 15.88 | 15.17 | 15.62 | 14.99 | 1.32E-02 | 7.37E-02 | 8.09E-01 | 1.71E-02 | 4.31E-01 | 9.37E-01 | 1.67E-01 |
| 488.23865 | 34.52  | 15.70 | 17.18 | 16.69 | 16.50 | 4.15E-09 | 9.57E-10 | 6.12E-05 | 2.74E-03 | 1.30E-01 | 2.07E-02 | 8.55E-01 |
| 488.55066 | 45.02  | 20.25 | 17.42 | 17.45 | 17.21 | 1.65E-15 | 2.19E-11 | 2.34E-11 | 2.61E-12 | 1.00E+00 | 9.53E-01 | 9.30E-01 |
| 488.64318 | 46.29  | 19.08 | 20.34 | 20.30 | 19.73 | 1.15E-16 | 1.05E-13 | 2.00E-13 | 1.89E-04 | 9.90E-01 | 8.99E-04 | 2.36E-03 |
| 488.74767 | 20.61  | 12.88 | 15.44 | 13.20 | 11.73 | 9.85E-08 | 8.58E-05 | 9.46E-01 | 2.14E-01 | 1.09E-03 | 3.35E-08 | 7.67E-02 |
| 488.78164 | 48.17  | 15.92 | 17.63 | 17.93 | 17.79 | 4.09E-38 | 3.74E-14 | 3.65E-14 | 3.65E-14 | 1.61E-01 | 7.04E-01 | 7.78E-01 |
| 488.82634 | 46.9   | 13.89 | 14.58 | 14.96 | 14.46 | 3.27E-03 | 8.16E-02 | 1.29E-03 | 2.13E-01 | 5.70E-01 | 9.82E-01 | 3.60E-01 |
| 488.8726  | 50.83  | 15.70 | 16.60 | 16.59 | 17.03 | 1.89E-03 | 4.47E-02 | 4.37E-02 | 1.16E-03 | 1.00E+00 | 6.42E-01 | 6.26E-01 |
| 488.91742 | 40.56  | 14.25 | 14.85 | 14.55 | 15.51 | 3.97E-03 | 2.84E-01 | 8.04E-01 | 2.00E-03 | 8.20E-01 | 2.61E-01 | 3.76E-02 |
| 488.95936 | 50.4   | 13.60 | 13.57 | 15.35 | 14.29 | 4.49E-07 | 1.00E+00 | 2.49E-06 | 1.94E-01 | 3.67E-06 | 1.84E-01 | 1.71E-02 |
| 489.08912 | 145.46 | 13.88 | 16.26 | 15.38 | 14.53 | 4.58E-15 | 7.95E-14 | 5.13E-07 | 9.58E-02 | 1.04E-02 | 5.83E-08 | 1.81E-02 |
| 489.11445 | 272.95 | 21.11 | 23.66 | 22.87 | 22.08 | 2.34E-24 | 4.16E-14 | 1.94E-13 | 1.20E-04 | 2.64E-03 | 3.56E-10 | 3.36E-03 |
| 489.5985  | 256.13 | 11.53 | 14.28 | 15.72 | 12.90 | 2.58E-13 | 1.59E-06 | 2.24E-13 | 5.06E-02 | 3.59E-02 | 6.11E-02 | 3.00E-06 |
| 489.61576 | 63.63  | 12.74 | 14.96 | 15.97 | 13.82 | 7.96E-14 | 3.26E-07 | 1.46E-13 | 4.04E-02 | 6.00E-02 | 3.44E-02 | 2.61E-06 |
| 489.77584 | 49.68  | 14.33 | 17.36 | 17.51 | 16.66 | 5.51E-60 | 3.65E-14 | 3.65E-14 | 3.65E-14 | 7.62E-01 | 1.13E-04 | 1.24E-06 |
| 489.86034 | 39.18  | 18.22 | 18.04 | 18.50 | 17.98 | 7.60E-03 | 6.55E-01 | 2.73E-01 | 4.32E-01 | 2.27E-02 | 9.82E-01 | 8.98E-03 |
| 489.91899 | 52.67  | 18.79 | 14.89 | 16.33 | 14.63 | 5.38E-18 | 8.87E-14 | 8.66E-07 | 7.45E-14 | 1.23E-02 | 9.52E-01 | 2.72E-03 |
| 489.951   | 58.05  | 14.10 | 14.38 | 15.32 | 14.41 | 9.02E-03 | 8.71E-01 | 5.62E-03 | 8.42E-01 | 6.68E-02 | 1.00E+00 | 9.39E-02 |
| 490.05022 | 271.62 | 14.05 | 15.28 | 16.51 | 15.39 | 6.86E-19 | 2.83E-06 | 7.07E-14 | 5.63E-07 | 4.85E-06 | 9.70E-01 | 6.50E-05 |
| 490.07362 | 228.83 | 12.23 | 20.61 | 19.52 | 18.42 | 2.81E-41 | 3.65E-14 | 3.65E-14 | 4.67E-14 | 1.82E-01 | 6.48E-04 | 1.95E-01 |
| 490.08473 | 100.75 | 15.11 | 13.67 | 13.74 | 13.85 | 4.06E-09 | 1.08E-07 | 3.46E-07 | 8.33E-06 | 9.93E-01 | 8.93E-01 | 9.69E-01 |
| 490.10628 | 83.47  | 13.13 | 15.45 | 14.02 | 14.90 | 3.53E-13 | 7.06E-13 | 1.26E-02 | 8.48E-08 | 1.96E-05 | 2.84E-01 | 2.40E-02 |
| 490.11817 | 267.38 | 17.55 | 20.72 | 19.96 | 18.99 | 9.00E-23 | 5.67E-14 | 8.86E-14 | 1.03E-05 | 5.00E-02 | 1.93E-07 | 7.10E-03 |
| 490.3526  | 23.1   | 16.70 | 16.36 | 16.11 | 16.25 | 1.29E-01 | 5.45E-01 | 9.82E-02 | 3.22E-01 | 7.84E-01 | 9.78E-01 | 9.56E-01 |
| 490.42531 | 22.4   | 16.07 | 10.08 | 10.81 | 11.33 | 7.19E-36 | 3.65E-14 | 3.67E-14 | 6.01E-14 | 3.30E-01 | 2.82E-02 | 6.45E-01 |
| 490.54819 | 45.04  | 18.92 | 15.28 | 15.04 | 15.35 | 1.34E-17 | 6.18E-13 | 8.78E-14 | 4.97E-12 | 9.59E-01 | 9.99E-01 | 9.21E-01 |
| 490.64078 | 46.43  | 18.69 | 19.97 | 19.93 | 19.34 | 1.31E-17 | 8.14E-14 | 9.47E-14 | 1.42E-04 | 9.95E-01 | 4.85E-04 | 1.07E-03 |
| 490.68879 | 46.44  | 14.40 | 13.76 | 15.24 | 13.24 | 3.61E-06 | 3.04E-01 | 1.01E-01 | 1.15E-02 | 6.62E-04 | 5.23E-01 | 2.63E-06 |
| 490.72953 | 46.82  | 17.90 | 19.79 | 19.85 | 19.49 | 1.10E-39 | 3.65E-14 | 3.65E-14 | 4.21E-14 | 9.73E-01 | 1.52E-01 | 5.48E-02 |
| 490.82331 | 43.06  | 15.98 | 15.64 | 14.91 | 15.41 | 1.57E-04 | 4.59E-01 | 4.95E-05 | 9.22E-02 | 1.68E-02 | 8.14E-01 | 1.85E-01 |
| 490.85278 | 40.18  | 17.66 | 19.16 | 19.34 | 18.61 | 2.09E-16 | 2.36E-12 | 7.74E-14 | 1.90E-05 | 7.99E-01 | 4.09E-02 | 2.40E-03 |
| 490.99551 | 198.82 | 11.96 | 13.29 | 14.16 | 13.94 | 2.49E-05 | 3.02E-02 | 3.60E-05 | 4.51E-04 | 2.89E-01 | 5.76E-01 | 9.72E-01 |
| 491.03765 | 55.99  | 17.03 | 14.11 | 14.68 | 16.22 | 8.10E-16 | 1.09E-13 | 5.05E-10 | 1.06E-01 | 3.81E-01 | 2.06E-07 | 2.18E-04 |
| 491.07616 | 190.39 | 7.40  | 16.59 | 15.43 | 13.48 | 9.13E-50 | 3.65E-14 | 3.65E-14 | 3.87E-14 | 1.04E-01 | 6.55E-08 | 1.24E-03 |
| 491.08758 | 98.04  | 18.57 | 18.61 | 18.88 | 18.08 | 1.26E-02 | 9.98E-01 | 5.10E-01 | 1.64E-01 | 6.57E-01 | 1.29E-01 | 5.47E-03 |
| 491.11928 | 259.55 | 15.27 | 17.50 | 15.78 | 15.16 | 1.68E-13 | 1.02E-11 | 3.16E-01 | 9.86E-01 | 3.02E-07 | 1.70E-11 | 2.08E-01 |
| 491.35576 | 22.8   | 13.95 | 12.40 | 12.59 | 12.76 | 3.80E-04 | 6.19E-04 | 3.14E-03 | 1.82E-02 | 9.66E-01 | 8.24E-01 | 9.76E-01 |
| 491.72698 | 49.1   | 15.64 | 17.98 | 18.21 | 17.19 | 8.25E-24 | 7.56E-14 | 6.07E-14 | 7.49E-09 | 7.74E-01 | 1.02E-02 | 3.33E-04 |
| 491.82478 | 46.92  | 15.32 | 14.00 | 13.95 | 14.40 | 4.42E-07 | 7.19E-06 | 2.14E-06 | 4.34E-03 | 9.97E-01 | 4.92E-01 | 3.68E-01 |
| 491.85981 | 50.72  | 15.26 | 17.14 | 17.36 | 16.92 | 1.88E-14 | 1.29E-10 | 5.71E-13 | 3.16E-08 | 8.45E-01 | 8.66E-01 | 3.92E-01 |
| 491.88773 | 49.85  | 13.82 | 13.01 | 15.06 | 13.59 | 3.42E-05 | 2.02E-01 | 1.37E-02 | 9.49E-01 | 1.25E-05 | 5.41E-01 | 4.34E-03 |
| 492.01105 | 246.97 | 14.86 | 14.29 | 13.30 | 14.34 | 2.40E-03 | 5.09E-01 | 8.82E-04 | 6.09E-01 | 8.60E-02 | 9.99E-01 | 7.40E-02 |
| 492.10752 | 67.11  | 11.99 | 16.66 | 15.71 | 15.69 | 4.61E-20 | 7.24E-14 | 5.09E-13 | 3.14E-12 | 2.04E-01 | 2.15E-01 | 1.00E+00 |
| 492.24629 | 44.17  | 16.30 | 17.49 | 17.24 | 16.55 | 2.94E-07 | 1.82E-06 | 1.97E-04 | 7.14E-01 | 7.12E-01 | 5.82E-04 | 1.80E-02 |
| 492.30756 | 34.82  | 17.85 | 16.13 | 17.00 | 17.20 | 5.98E-07 | 9.03E-08 | 1.86E-02 | 1.38E-01 | 2.18E-02 | 3.60E-03 | 9.09E-01 |
| 492.54486 | 45.1   | 17.32 | 10.92 | 10.94 | 11.40 | 2.40E-34 | 3.67E-14 | 3.67E-14 | 4.59E-14 | 1.00E+00 | 7.93E-01 | 8.15E-01 |
| 492.59099 | 45.85  | 19.57 | 18.55 | 18.21 | 17.90 | 3.91E-08 | 1.39E-03 | 7.39E-06 | 6.98E-08 | 6.39E-01 | 1.20E-01 | 6.96E-01 |
| 492.63814 | 46.5   | 17.42 | 18.62 | 18.52 | 18.02 | 3.83E-18 | 7.41E-14 | 1.12E-13 | 7.95E-05 | 8.78E-01 | 1.82E-04 | 2.54E-03 |
| 492.68642 | 46.27  | 14.32 | 13.14 | 14.16 | 12.96 | 1.05E-04 | 4.87E-03 | 9.72E-01 | 1.10E-03 | 2.34E-02 | 9.61E-01 | 6.32E-03 |

|           |        |       |       |       |       |          |          |          |          |          |          |          |
|-----------|--------|-------|-------|-------|-------|----------|----------|----------|----------|----------|----------|----------|
| 492.7272  | 46.78  | 18.27 | 20.16 | 20.31 | 19.84 | 3.38E-45 | 3.65E-14 | 3.65E-14 | 3.72E-14 | 6.51E-01 | 6.45E-02 | 1.89E-03 |
| 492.77175 | 45.86  | 14.48 | 17.57 | 18.06 | 16.73 | 7.65E-25 | 7.43E-14 | 4.79E-14 | 2.33E-10 | 4.45E-01 | 6.13E-02 | 5.30E-04 |
| 492.81755 | 47.71  | 16.16 | 16.11 | 15.79 | 16.07 | 4.57E-01 | 9.97E-01 | 4.26E-01 | 9.79E-01 | 5.85E-01 | 9.98E-01 | 7.19E-01 |
| 492.85336 | 40.48  | 18.52 | 19.45 | 19.67 | 19.07 | 1.63E-14 | 9.52E-10 | 1.19E-13 | 9.35E-04 | 4.22E-01 | 4.59E-02 | 2.92E-04 |
| 493.04227 | 64.43  | 18.41 | 18.76 | 19.09 | 18.22 | 2.18E-03 | 4.21E-01 | 1.80E-02 | 8.54E-01 | 5.22E-01 | 1.21E-01 | 2.43E-03 |
| 493.09146 | 63.94  | 17.19 | 18.60 | 18.38 | 17.96 | 5.35E-09 | 1.07E-08 | 1.43E-06 | 5.40E-03 | 7.65E-01 | 3.80E-02 | 2.93E-01 |
| 493.12076 | 85.22  | 14.97 | 16.05 | 15.61 | 14.95 | 1.76E-03 | 4.48E-03 | 1.74E-01 | 1.00E+00 | 5.42E-01 | 6.99E-03 | 1.96E-01 |
| 493.51354 | 54.21  | 15.89 | 18.08 | 17.55 | 17.07 | 1.32E-15 | 7.38E-14 | 4.75E-10 | 2.97E-05 | 1.69E-01 | 8.76E-04 | 2.42E-01 |
| 493.72403 | 49.33  | 16.13 | 18.76 | 19.05 | 18.39 | 7.20E-34 | 3.76E-14 | 3.65E-14 | 7.36E-14 | 5.67E-01 | 3.64E-01 | 2.08E-02 |
| 493.85877 | 51     | 12.64 | 13.47 | 13.09 | 13.99 | 1.07E-03 | 6.13E-02 | 5.30E-01 | 5.35E-04 | 6.65E-01 | 4.45E-01 | 4.66E-02 |
| 493.8827  | 44.57  | 14.06 | 14.02 | 14.91 | 15.13 | 1.11E-05 | 9.99E-01 | 5.26E-03 | 4.04E-04 | 4.66E-03 | 3.78E-04 | 8.52E-01 |
| 494.01434 | 62.02  | 12.28 | 14.42 | 12.84 | 12.95 | 4.27E-06 | 1.41E-06 | 4.89E-01 | 3.72E-01 | 9.32E-04 | 3.46E-03 | 9.95E-01 |
| 494.28921 | 27.67  | 9.32  | 18.09 | 16.04 | 15.80 | 3.79E-34 | 3.65E-14 | 5.63E-14 | 7.14E-14 | 6.72E-03 | 2.70E-03 | 9.81E-01 |
| 494.32414 | 28.59  | 23.45 | 22.98 | 22.92 | 22.72 | 4.63E-06 | 4.64E-03 | 7.60E-04 | 3.06E-06 | 9.68E-01 | 2.68E-01 | 5.09E-01 |
| 494.58954 | 45.98  | 20.64 | 19.90 | 19.66 | 19.33 | 2.54E-06 | 1.33E-02 | 3.30E-04 | 1.79E-06 | 7.59E-01 | 1.17E-01 | 5.67E-01 |
| 494.72438 | 46.6   | 16.82 | 19.19 | 19.40 | 18.70 | 2.55E-37 | 3.65E-14 | 3.65E-14 | 7.17E-14 | 6.67E-01 | 4.60E-02 | 1.27E-03 |
| 494.76855 | 45.32  | 15.00 | 16.91 | 17.61 | 16.36 | 1.42E-25 | 7.41E-14 | 3.76E-14 | 2.49E-08 | 1.03E-02 | 7.11E-02 | 5.30E-07 |
| 494.81287 | 46.83  | 17.37 | 18.97 | 19.02 | 19.05 | 7.24E-25 | 7.51E-14 | 7.43E-14 | 7.51E-14 | 9.89E-01 | 9.67E-01 | 9.98E-01 |
| 494.86063 | 37.34  | 18.16 | 18.10 | 18.42 | 17.82 | 2.68E-03 | 9.79E-01 | 2.75E-01 | 1.25E-01 | 1.47E-01 | 2.94E-01 | 8.69E-04 |
| 494.92239 | 269.18 | 16.15 | 17.58 | 20.10 | 18.00 | 3.27E-24 | 1.12E-04 | 3.76E-14 | 5.47E-07 | 8.71E-12 | 6.09E-01 | 3.01E-08 |
| 494.93761 | 271.25 | 16.44 | 16.06 | 16.24 | 16.53 | 7.08E-01 | 7.96E-01 | 9.63E-01 | 9.97E-01 | 9.74E-01 | 7.08E-01 | 9.11E-01 |
| 494.99738 | 40.23  | 13.40 | 15.78 | 15.19 | 15.37 | 4.87E-22 | 6.83E-14 | 4.76E-13 | 9.11E-14 | 5.47E-02 | 3.26E-01 | 8.65E-01 |
| 495.04186 | 62.46  | 14.26 | 13.81 | 14.16 | 13.34 | 3.31E-01 | 8.26E-01 | 9.98E-01 | 3.17E-01 | 9.11E-01 | 8.29E-01 | 4.34E-01 |
| 495.06716 | 121.02 | 12.44 | 15.15 | 10.19 | 12.68 | 1.25E-21 | 5.95E-09 | 1.24E-06 | 9.47E-01 | 4.79E-14 | 6.31E-07 | 3.87E-07 |
| 495.0894  | 265.95 | 16.76 | 18.98 | 21.00 | 19.46 | 6.67E-32 | 7.61E-12 | 3.65E-14 | 7.54E-14 | 1.02E-09 | 4.10E-01 | 7.82E-06 |
| 495.10991 | 60.77  | 14.31 | 12.97 | 12.93 | 13.59 | 9.95E-05 | 5.32E-04 | 2.74E-04 | 1.53E-01 | 9.99E-01 | 3.18E-01 | 2.51E-01 |
| 495.12339 | 160.96 | 10.37 | 16.81 | 10.76 | 14.41 | 2.59E-32 | 3.65E-14 | 8.63E-01 | 8.87E-13 | 4.07E-14 | 5.49E-05 | 2.04E-10 |
| 495.13549 | 81.71  | 14.29 | 16.91 | 14.95 | 16.69 | 8.53E-13 | 1.69E-10 | 2.83E-01 | 1.14E-08 | 3.96E-06 | 9.47E-01 | 8.29E-05 |
| 495.14821 | 80.11  | 15.16 | 17.26 | 15.21 | 16.32 | 3.77E-11 | 1.07E-09 | 9.99E-01 | 2.28E-03 | 5.40E-09 | 2.52E-02 | 4.69E-03 |
| 495.16021 | 184.64 | 13.59 | 13.00 | 12.86 | 12.84 | 1.34E-02 | 1.07E-01 | 2.56E-02 | 2.74E-02 | 9.54E-01 | 9.40E-01 | 1.00E+00 |
| 495.17973 | 98.32  | 14.39 | 16.10 | 15.93 | 15.38 | 1.31E-17 | 7.45E-14 | 1.73E-13 | 5.23E-06 | 8.41E-01 | 2.24E-03 | 2.70E-02 |
| 495.25643 | 266.27 | 16.75 | 18.32 | 20.64 | 18.85 | 5.83E-28 | 1.36E-06 | 3.65E-14 | 2.24E-10 | 2.33E-12 | 3.24E-01 | 1.23E-07 |
| 495.32742 | 28.06  | 21.53 | 20.88 | 20.84 | 20.60 | 1.51E-09 | 2.32E-05 | 6.27E-06 | 2.07E-09 | 9.95E-01 | 2.30E-01 | 3.31E-01 |
| 495.42356 | 268.72 | 15.25 | 17.37 | 19.70 | 17.58 | 4.16E-25 | 7.32E-08 | 3.70E-14 | 7.58E-09 | 6.76E-09 | 9.45E-01 | 3.01E-07 |
| 495.59043 | 260.33 | 15.90 | 16.37 | 18.40 | 16.45 | 3.64E-14 | 4.03E-01 | 1.37E-13 | 2.96E-01 | 3.01E-09 | 9.96E-01 | 2.57E-08 |
| 495.72117 | 49.22  | 14.94 | 18.21 | 18.51 | 17.26 | 2.39E-23 | 7.63E-14 | 6.54E-14 | 8.28E-10 | 8.14E-01 | 3.98E-02 | 2.56E-03 |
| 495.75764 | 252.13 | 15.33 | 13.77 | 16.76 | 14.51 | 5.72E-19 | 1.10E-06 | 7.96E-06 | 3.26E-02 | 7.38E-14 | 7.60E-02 | 1.96E-11 |
| 495.81046 | 50.15  | 16.53 | 18.28 | 18.51 | 17.98 | 9.71E-42 | 3.65E-14 | 3.65E-14 | 4.81E-14 | 2.42E-01 | 1.12E-01 | 3.31E-04 |
| 495.92697 | 53.48  | 21.08 | 21.28 | 22.00 | 20.65 | 5.45E-09 | 7.27E-01 | 1.77E-05 | 1.47E-01 | 2.04E-03 | 1.37E-02 | 1.75E-09 |
| 495.9994  | 57.36  | 16.70 | 14.32 | 12.42 | 13.58 | 4.40E-14 | 2.79E-05 | 9.20E-14 | 5.13E-08 | 1.83E-03 | 5.19E-01 | 1.32E-01 |
| 496.12064 | 73.54  | 12.01 | 12.28 | 13.81 | 14.28 | 6.10E-03 | 9.83E-01 | 6.88E-02 | 1.57E-02 | 1.84E-01 | 5.36E-02 | 9.28E-01 |
| 496.15665 | 184.63 | 14.35 | 15.38 | 14.92 | 14.67 | 1.19E-04 | 4.07E-05 | 5.22E-02 | 4.93E-01 | 1.87E-01 | 1.67E-02 | 7.23E-01 |
| 496.18311 | 98.19  | 17.86 | 19.84 | 19.91 | 18.88 | 3.52E-26 | 6.54E-14 | 5.34E-14 | 1.22E-06 | 9.87E-01 | 8.52E-06 | 1.50E-06 |
| 496.33946 | 27.77  | 27.02 | 26.95 | 26.71 | 26.46 | 2.28E-03 | 9.72E-01 | 1.65E-01 | 2.54E-03 | 3.93E-01 | 1.41E-02 | 4.25E-01 |
| 496.58643 | 46.05  | 20.56 | 19.82 | 19.54 | 19.10 | 1.36E-07 | 1.23E-02 | 1.55E-04 | 5.75E-08 | 6.65E-01 | 2.32E-02 | 2.85E-01 |
| 496.67646 | 46.68  | 18.24 | 19.77 | 19.75 | 19.23 | 3.32E-26 | 5.52E-14 | 5.76E-14 | 2.12E-10 | 9.97E-01 | 1.27E-03 | 2.23E-03 |
| 496.72266 | 46.55  | 14.32 | 16.10 | 17.11 | 16.47 | 1.55E-19 | 4.30E-09 | 7.25E-14 | 6.34E-12 | 2.50E-03 | 5.99E-01 | 1.20E-01 |
| 496.76637 | 43.76  | 12.78 | 12.15 | 14.08 | 11.97 | 3.08E-04 | 6.00E-01 | 4.93E-02 | 4.01E-01 | 1.42E-03 | 9.86E-01 | 5.44E-04 |
| 496.79477 | 49.58  | 17.88 | 12.65 | 12.61 | 12.67 | 3.07E-25 | 7.34E-14 | 7.09E-14 | 7.34E-14 | 1.00E+00 | 1.00E+00 | 9.99E-01 |
| 496.81328 | 48.82  | 15.58 | 18.09 | 18.17 | 18.10 | 8.11E-34 | 3.76E-14 | 3.67E-14 | 3.94E-14 | 9.82E-01 | 1.00E+00 | 9.90E-01 |
| 496.85973 | 46.31  | 15.99 | 15.03 | 16.03 | 15.40 | 1.01E-03 | 3.77E-03 | 9.99E-01 | 1.70E-01 | 3.27E-03 | 5.89E-01 | 1.46E-01 |
| 496.90777 | 23.87  | 13.56 | 12.93 | 14.20 | 13.16 | 1.28E-05 | 6.28E-02 | 5.49E-02 | 4.05E-01 | 1.06E-05 | 8.31E-01 | 6.50E-04 |
| 496.92978 | 52.75  | 17.04 | 16.59 | 17.19 | 15.38 | 1.09E-05 | 5.97E-01 | 9.74E-01 | 6.65E-05 | 3.63E-01 | 9.16E-03 | 1.76E-05 |
| 496.97064 | 85.71  | 15.02 | 18.55 | 18.31 | 17.64 | 3.90E-31 | 3.67E-14 | 3.94E-14 | 7.28E-14 | 8.24E-01 | 1.17E-02 | 1.05E-01 |
| 496.98358 | 53.99  | 14.97 | 16.75 | 15.02 | 14.53 | 9.77E-06 | 3.49E-04 | 1.00E+00 | 7.48E-01 | 7.54E-04 | 1.47E-05 | 7.02E-01 |
| 497.04868 | 56.57  | 15.15 | 11.62 | 16.20 | 13.34 | 1.08E-19 | 1.01E-12 | 8.62E-02 | 6.62E-04 | 7.38E-14 | 2.01E-03 | 3.24E-08 |
| 497.10538 | 68.31  | 16.10 | 16.89 | 17.95 | 16.95 | 4.31E-15 | 7.17E-04 | 7.27E-14 | 3.39E-04 | 5.02E-06 | 9.92E-01 | 3.25E-05 |
| 497.19699 | 27.73  | 15.15 | 18.87 | 18.04 | 18.27 | 1.08E-58 | 3.65E-14 | 3.65E-14 | 3.65E-14 | 3.52E-05 | 6.63E-03 | 6.14E-01 |
| 497.23582 | 30.73  | 16.05 | 16.27 | 15.32 | 17.67 | 1.54E-06 | 9.44E-01 | 2.52E-01 | 5.77E-04 | 9.26E-02 | 5.92E-03 | 3.41E-07 |
| 497.34289 | 27.12  | 24.89 | 25.10 | 24.80 | 24.40 | 1.44E-03 | 5.84E-01 | 9.46E-01 | 2.39E-02 | 2.90E-01 | 5.62E-04 | 1.07E-01 |
| 497.71755 | 49.09  | 14.49 | 16.58 | 16.71 | 15.65 | 2.13E-15 | 3.92E-12 | 1.87E-13 | 2.86E-04 | 9.64E-01 | 8.41E-03 | 1.56E-03 |
| 497.80746 | 50     | 15.33 | 18.29 | 18.57 | 17.74 | 6.39E-69 | 3.65E-14 | 3.65E-14 | 3.65E-14 | 1.79E-01 | 6.45E-04 | 6.28E-08 |
| 497.92381 | 51.66  | 19.15 | 18.96 | 19.81 | 18.23 | 7.81E-10 | 8.00E-01 | 9.58E-03 | 1.90E-04 | 6.11E-04 | 7.18E-03 | 8.43E-11 |
| 498.00002 | 305.73 | 15.12 | 19.15 | 17.70 | 16.36 | 1.46E-37 | 3.65E-14 | 7.31E-14 | 2.51E-05 | 4.29E-07 | 7.16E-14 | 7.12E-06 |
| 498.00202 | 85.39  | 10.90 | 15.14 | 15.88 | 14.56 | 1.37E-31 | 5.12E-14 | 3.65E-14 | 7.36E-14 | 2.23E-01 | 4.66E-01 | 5.39E-03 |
| 498.01825 | 87.19  | 11.13 | 18.53 | 17.85 | 16.84 | 3.61E-51 | 3.65E-14 | 3.65E-14 | 3.65E-14 | 3.51E-01 | 4.88E-04 | 7.50E-02 |
| 498.06194 | 271.56 | 15.57 | 16.26 | 16.59 | 14.96 | 6.07E-07 | 8.03E-02 | 2.57E-03 | 1.60E-01 | 6.90E-01 | 1.56E-04 | 1.03E-06 |
| 498.10165 | 92.22  | 12.12 | 13.18 | 12.70 | 11.30 | 5.72E-04 | 7.14E-02 | 5.25E-01 | 2.63E-01 | 7.06E-01 | 3.60E-04 | 1.27E-02 |

|           |        |       |       |       |       |           |          |          |          |          |          |          |
|-----------|--------|-------|-------|-------|-------|-----------|----------|----------|----------|----------|----------|----------|
| 498.12416 | 66.89  | 14.03 | 13.43 | 11.98 | 12.93 | 8.91E-08  | 2.83E-01 | 2.47E-08 | 9.25E-03 | 2.45E-04 | 5.07E-01 | 3.98E-02 |
| 498.26805 | 91.35  | 9.89  | 17.86 | 17.00 | 16.56 | 2.81E-41  | 3.65E-14 | 3.65E-14 | 3.67E-14 | 3.54E-01 | 8.03E-02 | 8.49E-01 |
| 498.34575 | 27.38  | 22.21 | 22.35 | 22.17 | 21.51 | 2.07E-04  | 8.76E-01 | 9.97E-01 | 2.02E-03 | 7.94E-01 | 2.04E-04 | 5.01E-03 |
| 498.5193  | 90.82  | 10.36 | 17.45 | 16.40 | 15.83 | 1.70E-56  | 3.65E-14 | 3.65E-14 | 3.65E-14 | 1.65E-02 | 7.81E-05 | 3.92E-01 |
| 498.58319 | 45.9   | 19.74 | 18.74 | 18.64 | 18.29 | 1.05E-07  | 3.09E-04 | 4.93E-05 | 1.32E-07 | 9.80E-01 | 3.08E-01 | 5.19E-01 |
| 498.67314 | 46.75  | 18.95 | 20.47 | 20.42 | 19.98 | 5.68E-26  | 5.50E-14 | 6.27E-14 | 1.84E-11 | 9.85E-01 | 5.14E-03 | 1.40E-02 |
| 498.77372 | 66.68  | 11.53 | 9.85  | 15.55 | 13.57 | 5.65E-25  | 2.62E-03 | 8.49E-14 | 2.13E-04 | 4.16E-14 | 1.34E-11 | 5.53E-04 |
| 498.7927  | 49.9   | 18.09 | 12.52 | 13.15 | 13.63 | 2.60E-30  | 3.70E-14 | 5.12E-14 | 7.49E-14 | 5.08E-01 | 8.58E-02 | 7.28E-01 |
| 498.8101  | 50.89  | 12.44 | 13.27 | 14.70 | 14.75 | 1.33E-08  | 1.92E-01 | 5.42E-07 | 7.86E-07 | 4.47E-03 | 4.42E-03 | 9.99E-01 |
| 498.90256 | 36.33  | 17.59 | 15.30 | 15.25 | 15.88 | 3.32E-10  | 2.08E-08 | 6.57E-09 | 6.63E-05 | 9.99E-01 | 4.65E-01 | 3.72E-01 |
| 498.92916 | 42.32  | 14.24 | 15.75 | 17.89 | 14.57 | 9.20E-24  | 4.75E-05 | 5.34E-14 | 7.54E-01 | 6.94E-09 | 5.13E-03 | 7.36E-14 |
| 499.05333 | 60.43  | 16.85 | 16.38 | 17.13 | 15.86 | 2.74E-04  | 3.56E-01 | 7.67E-01 | 5.37E-03 | 5.63E-02 | 3.34E-01 | 2.44E-04 |
| 499.32147 | 26.58  | 16.73 | 19.12 | 16.12 | 16.01 | 1.33E-102 | 3.65E-14 | 6.20E-12 | 8.25E-14 | 3.65E-14 | 3.65E-14 | 5.61E-01 |
| 499.34826 | 27.26  | 18.99 | 19.04 | 18.91 | 18.40 | 2.01E-03  | 9.86E-01 | 9.70E-01 | 5.64E-03 | 8.69E-01 | 2.65E-03 | 2.59E-02 |
| 499.80371 | 49.33  | 15.03 | 16.81 | 16.87 | 16.17 | 3.72E-35  | 3.65E-14 | 3.65E-14 | 1.65E-13 | 9.67E-01 | 6.46E-05 | 7.21E-06 |
| 499.89791 | 45.37  | 17.79 | 17.89 | 18.12 | 17.91 | 4.10E-01  | 9.61E-01 | 3.33E-01 | 9.32E-01 | 6.58E-01 | 9.99E-01 | 7.47E-01 |
| 499.92345 | 49.86  | 14.83 | 13.02 | 14.16 | 12.31 | 2.48E-07  | 3.45E-04 | 4.16E-01 | 4.91E-07 | 6.12E-02 | 4.32E-01 | 5.56E-04 |
| 499.97291 | 84.7   | 15.70 | 19.56 | 18.91 | 18.17 | 2.65E-35  | 3.65E-14 | 3.74E-14 | 7.44E-14 | 8.16E-02 | 8.31E-06 | 4.04E-02 |
| 499.98913 | 267.21 | 16.53 | 19.05 | 18.27 | 17.59 | 1.34E-22  | 5.10E-14 | 9.26E-13 | 3.67E-05 | 4.59E-03 | 1.96E-08 | 2.04E-02 |
| 500.04553 | 303.77 | 14.30 | 14.51 | 14.06 | 14.02 | 5.04E-01  | 9.23E-01 | 9.05E-01 | 8.65E-01 | 5.83E-01 | 5.34E-01 | 9.99E-01 |
| 500.08103 | 282.76 | 10.98 | 16.78 | 18.04 | 15.88 | 4.69E-40  | 3.65E-14 | 3.65E-14 | 6.49E-14 | 2.88E-02 | 2.22E-01 | 3.21E-05 |
| 500.09411 | 270.67 | 15.54 | 17.15 | 18.18 | 16.74 | 8.93E-20  | 4.65E-09 | 6.61E-14 | 3.07E-05 | 4.21E-04 | 4.12E-01 | 6.16E-07 |
| 500.26086 | 273.09 | 14.11 | 18.00 | 19.04 | 17.41 | 2.73E-28  | 7.34E-14 | 3.67E-14 | 1.69E-13 | 4.95E-02 | 4.79E-01 | 5.46E-04 |
| 500.27714 | 33.8   | 15.82 | 15.13 | 15.46 | 13.29 | 3.32E-04  | 6.47E-01 | 9.28E-01 | 2.28E-04 | 9.47E-01 | 1.76E-02 | 2.88E-03 |
| 500.29162 | 31.52  | 11.89 | 16.63 | 8.71  | 10.34 | 1.54E-39  | 7.38E-14 | 5.56E-10 | 8.14E-03 | 3.65E-14 | 3.67E-14 | 6.57E-03 |
| 500.42849 | 271.88 | 16.41 | 17.78 | 18.77 | 17.51 | 5.80E-17  | 3.85E-07 | 7.49E-14 | 1.08E-04 | 5.09E-04 | 7.25E-01 | 8.84E-06 |
| 500.58038 | 45.91  | 17.92 | 16.94 | 16.38 | 16.16 | 8.62E-07  | 1.67E-02 | 2.33E-05 | 2.55E-06 | 3.44E-01 | 1.17E-01 | 9.23E-01 |
| 500.58105 | 217.11 | 9.08  | 15.84 | 16.94 | 13.94 | 1.59E-37  | 3.65E-14 | 3.65E-14 | 7.41E-14 | 1.72E-01 | 3.91E-03 | 7.28E-07 |
| 500.5954  | 269.65 | 15.70 | 17.02 | 17.94 | 16.45 | 1.96E-16  | 6.50E-07 | 7.49E-14 | 1.35E-02 | 1.33E-03 | 1.19E-01 | 8.28E-08 |
| 500.67049 | 46.54  | 18.35 | 19.73 | 19.69 | 19.30 | 9.41E-23  | 7.33E-14 | 7.56E-14 | 4.03E-10 | 9.91E-01 | 1.64E-02 | 3.48E-02 |
| 500.72007 | 46.78  | 14.27 | 15.14 | 16.12 | 14.68 | 2.05E-08  | 1.69E-02 | 7.76E-09 | 5.10E-01 | 7.93E-03 | 4.58E-01 | 3.76E-05 |
| 500.75897 | 47.03  | 17.25 | 19.40 | 19.55 | 19.27 | 2.03E-46  | 3.65E-14 | 3.65E-14 | 3.65E-14 | 6.82E-01 | 8.27E-01 | 2.11E-01 |
| 500.76253 | 267.15 | 12.98 | 15.92 | 16.61 | 15.27 | 1.76E-19  | 3.77E-13 | 7.47E-14 | 2.74E-08 | 2.66E-01 | 3.33E-01 | 3.38E-03 |
| 500.78463 | 49.03  | 16.28 | 15.86 | 14.85 | 16.75 | 8.00E-09  | 4.52E-01 | 4.73E-06 | 3.66E-01 | 3.47E-03 | 1.71E-02 | 6.02E-09 |
| 500.84338 | 21.09  | 13.88 | 11.92 | 12.92 | 12.72 | 2.02E-10  | 2.20E-11 | 1.88E-03 | 1.83E-04 | 1.80E-03 | 2.62E-02 | 8.90E-01 |
| 500.8837  | 50.89  | 18.24 | 18.24 | 18.72 | 17.82 | 1.72E-03  | 1.00E+00 | 1.06E-01 | 2.41E-01 | 1.24E-01 | 2.68E-01 | 5.26E-04 |
| 500.9033  | 20.37  | 13.04 | 13.69 | 14.05 | 13.20 | 1.76E-02  | 2.41E-01 | 1.76E-02 | 9.69E-01 | 7.30E-01 | 5.44E-01 | 8.98E-02 |
| 500.92773 | 44.25  | 9.63  | 9.51  | 13.04 | 10.13 | 7.38E-13  | 9.95E-01 | 6.58E-11 | 7.39E-01 | 6.40E-11 | 6.15E-01 | 1.58E-07 |
| 500.94401 | 87.46  | 15.29 | 17.54 | 15.65 | 16.46 | 4.00E-16  | 7.58E-14 | 4.85E-01 | 6.22E-05 | 2.93E-11 | 4.40E-04 | 1.30E-02 |
| 500.96883 | 92.39  | 11.47 | 18.75 | 18.32 | 16.38 | 7.77E-55  | 3.65E-14 | 3.65E-14 | 3.67E-14 | 6.66E-01 | 4.10E-08 | 8.00E-06 |
| 501.06629 | 57.91  | 18.77 | 19.97 | 19.72 | 20.39 | 5.06E-04  | 1.08E-02 | 6.42E-02 | 3.24E-04 | 9.18E-01 | 7.30E-01 | 3.43E-01 |
| 501.29728 | 33.9   | 12.41 | 17.51 | 14.68 | 15.52 | 8.29E-20  | 6.63E-14 | 1.77E-05 | 7.99E-09 | 1.52E-07 | 6.33E-04 | 3.44E-01 |
| 501.75554 | 49.38  | 16.30 | 17.61 | 17.75 | 16.88 | 5.53E-12  | 8.10E-09 | 1.02E-10 | 3.33E-02 | 9.03E-01 | 5.74E-03 | 4.66E-04 |
| 501.88983 | 51.65  | 15.20 | 15.84 | 16.98 | 15.96 | 7.30E-04  | 4.29E-01 | 2.09E-04 | 3.08E-01 | 4.87E-02 | 9.94E-01 | 1.05E-01 |
| 501.96996 | 87.9   | 13.37 | 16.55 | 14.27 | 14.70 | 4.61E-14  | 8.02E-14 | 6.96E-02 | 3.09E-03 | 3.62E-08 | 2.10E-05 | 6.86E-01 |
| 501.99019 | 59.13  | 17.39 | 15.01 | 16.97 | 15.44 | 2.50E-09  | 6.35E-08 | 7.19E-01 | 2.15E-05 | 1.83E-05 | 7.44E-01 | 1.84E-03 |
| 502.01805 | 284.91 | 15.55 | 15.23 | 15.71 | 13.67 | 1.99E-06  | 8.30E-01 | 9.74E-01 | 1.70E-05 | 6.00E-01 | 8.74E-04 | 4.38E-06 |
| 502.06872 | 56.04  | 16.04 | 15.19 | 14.03 | 16.26 | 2.85E-06  | 2.05E-01 | 2.99E-05 | 9.56E-01 | 4.78E-02 | 9.01E-02 | 1.04E-05 |
| 502.10702 | 58.35  | 12.91 | 13.95 | 15.19 | 13.56 | 1.39E-05  | 9.43E-02 | 3.83E-06 | 4.91E-01 | 3.90E-02 | 8.41E-01 | 3.69E-03 |
| 502.29258 | 27.22  | 20.70 | 20.24 | 20.31 | 19.56 | 7.41E-11  | 9.73E-03 | 4.29E-02 | 6.95E-12 | 9.53E-01 | 1.30E-04 | 1.20E-05 |
| 502.32869 | 27.91  | 17.28 | 17.67 | 17.15 | 17.67 | 9.59E-03  | 1.51E-01 | 8.87E-01 | 1.69E-01 | 3.10E-02 | 1.00E+00 | 3.72E-02 |
| 502.62082 | 49.32  | 19.76 | 19.64 | 19.53 | 19.18 | 7.70E-02  | 9.40E-01 | 7.19E-01 | 5.08E-02 | 9.68E-01 | 2.05E-01 | 4.20E-01 |
| 502.66404 | 147.45 | 8.91  | 14.03 | 12.93 | 13.37 | 5.15E-48  | 3.65E-14 | 3.65E-14 | 3.65E-14 | 1.39E-03 | 1.34E-01 | 4.73E-01 |
| 502.66707 | 46.66  | 15.02 | 17.87 | 17.85 | 17.34 | 8.68E-42  | 3.65E-14 | 3.65E-14 | 3.90E-14 | 1.00E+00 | 4.07E-02 | 5.01E-02 |
| 502.75609 | 46.65  | 17.00 | 19.47 | 19.73 | 19.32 | 6.37E-53  | 3.65E-14 | 3.65E-14 | 3.65E-14 | 3.05E-01 | 7.58E-01 | 3.81E-02 |
| 502.79607 | 44.03  | 15.03 | 18.03 | 18.27 | 17.78 | 4.52E-31  | 4.56E-14 | 3.70E-14 | 7.11E-14 | 7.91E-01 | 8.13E-01 | 2.78E-01 |
| 502.80554 | 42.88  | 14.56 | 13.84 | 15.30 | 13.72 | 1.96E-05  | 1.45E-01 | 1.19E-01 | 7.27E-02 | 1.90E-04 | 9.86E-01 | 6.81E-05 |
| 502.86445 | 145.82 | 9.59  | 13.74 | 12.84 | 13.66 | 4.41E-20  | 7.36E-14 | 1.56E-11 | 7.43E-14 | 1.95E-01 | 9.98E-01 | 2.92E-01 |
| 502.8884  | 52.62  | 17.32 | 18.37 | 18.65 | 18.10 | 9.89E-12  | 9.54E-08 | 9.95E-12 | 1.96E-04 | 4.32E-01 | 4.77E-01 | 1.97E-02 |
| 502.99078 | 85.12  | 15.45 | 17.28 | 16.77 | 16.27 | 2.19E-13  | 2.08E-13 | 6.33E-08 | 2.49E-03 | 1.17E-01 | 1.69E-04 | 1.49E-01 |
| 503.2277  | 146.49 | 12.75 | 13.88 | 12.51 | 13.08 | 9.88E-04  | 6.57E-03 | 8.89E-01 | 7.94E-01 | 7.35E-04 | 1.25E-01 | 3.92E-01 |
| 503.29589 | 27.05  | 18.65 | 18.29 | 18.29 | 17.56 | 1.06E-08  | 1.09E-01 | 1.08E-01 | 1.52E-09 | 1.00E+00 | 1.59E-04 | 1.27E-04 |
| 503.75328 | 49.89  | 14.17 | 18.08 | 18.32 | 17.13 | 2.14E-43  | 3.65E-14 | 3.65E-14 | 5.30E-14 | 7.92E-01 | 3.41E-03 | 9.58E-05 |
| 504.06986 | 79.22  | 13.96 | 14.36 | 14.57 | 14.87 | 2.73E-02  | 5.51E-01 | 1.72E-01 | 1.67E-02 | 8.98E-01 | 3.56E-01 | 7.62E-01 |
| 504.30607 | 40.44  | 16.34 | 13.04 | 14.46 | 12.72 | 7.16E-07  | 1.59E-05 | 3.01E-02 | 3.21E-06 | 1.84E-01 | 9.69E-01 | 7.49E-02 |
| 504.34476 | 28.05  | 17.20 | 17.94 | 17.39 | 17.70 | 2.22E-07  | 2.28E-07 | 4.33E-01 | 1.32E-03 | 3.30E-04 | 2.97E-01 | 1.18E-01 |
| 504.50369 | 53.88  | 16.11 | 18.01 | 17.34 | 16.73 | 6.47E-12  | 3.45E-12 | 7.47E-06 | 7.65E-02 | 4.12E-02 | 1.13E-05 | 9.27E-02 |
| 504.61724 | 45.58  | 20.42 | 20.60 | 20.34 | 20.02 | 1.06E-01  | 8.53E-01 | 9.85E-01 | 2.93E-01 | 6.77E-01 | 6.76E-02 | 5.02E-01 |

|           |        |       |       |       |       |          |          |          |          |          |          |          |
|-----------|--------|-------|-------|-------|-------|----------|----------|----------|----------|----------|----------|----------|
| 504.75562 | 46.3   | 15.13 | 18.04 | 18.45 | 18.10 | 9.80E-56 | 3.65E-14 | 3.65E-14 | 3.65E-14 | 8.82E-02 | 9.86E-01 | 2.10E-01 |
| 504.79638 | 47.37  | 14.77 | 17.06 | 17.41 | 17.35 | 5.45E-28 | 7.43E-14 | 4.65E-14 | 6.36E-14 | 4.52E-01 | 6.28E-01 | 9.96E-01 |
| 504.84277 | 47.61  | 16.16 | 18.01 | 17.91 | 18.23 | 1.34E-20 | 7.98E-14 | 1.38E-13 | 7.29E-14 | 9.68E-01 | 7.62E-01 | 4.79E-01 |
| 504.89282 | 42.25  | 15.53 | 18.68 | 18.23 | 17.59 | 8.39E-32 | 3.65E-14 | 4.43E-14 | 8.66E-14 | 2.34E-01 | 1.09E-04 | 5.31E-02 |
| 505.00549 | 53.56  | 14.02 | 14.15 | 12.30 | 13.36 | 6.80E-07 | 9.84E-01 | 6.82E-06 | 2.50E-01 | 2.78E-06 | 1.43E-01 | 2.08E-02 |
| 505.05744 | 45.76  | 13.19 | 14.11 | 11.95 | 14.55 | 3.29E-07 | 1.76E-01 | 2.97E-02 | 1.79E-02 | 2.91E-05 | 7.83E-01 | 5.73E-07 |
| 505.06827 | 82.67  | 13.56 | 14.20 | 14.04 | 13.29 | 1.16E-02 | 1.22E-01 | 3.52E-01 | 7.97E-01 | 9.42E-01 | 1.69E-02 | 7.06E-02 |
| 505.08469 | 248.04 | 14.33 | 17.44 | 14.98 | 14.80 | 5.25E-28 | 3.70E-14 | 4.27E-02 | 2.53E-01 | 7.36E-14 | 7.36E-14 | 9.00E-01 |
| 505.50254 | 53.62  | 13.67 | 15.28 | 14.17 | 13.69 | 1.14E-04 | 1.86E-04 | 5.35E-01 | 1.00E+00 | 2.48E-02 | 6.03E-04 | 6.23E-01 |
| 505.69014 | 279.6  | 15.50 | 14.57 | 14.93 | 15.37 | 5.96E-03 | 6.42E-03 | 1.77E-01 | 9.72E-01 | 6.04E-01 | 3.93E-02 | 4.42E-01 |
| 505.74853 | 48.75  | 15.30 | 17.21 | 17.35 | 16.63 | 1.87E-32 | 3.74E-14 | 3.65E-14 | 1.22E-13 | 8.15E-01 | 3.37E-03 | 1.13E-04 |
| 505.8381  | 50.7   | 16.93 | 18.11 | 18.51 | 17.85 | 4.28E-16 | 8.43E-10 | 7.43E-14 | 3.76E-06 | 1.09E-01 | 5.09E-01 | 2.12E-03 |
| 505.92977 | 49.86  | 13.52 | 12.96 | 13.31 | 13.52 | 2.64E-01 | 2.77E-01 | 9.09E-01 | 1.00E+00 | 6.85E-01 | 3.19E-01 | 9.17E-01 |
| 505.96263 | 42.31  | 12.50 | 13.70 | 11.60 | 11.94 | 3.64E-08 | 2.49E-03 | 3.99E-02 | 3.67E-01 | 3.34E-08 | 9.06E-06 | 7.86E-01 |
| 506.26476 | 40.65  | 12.40 | 15.10 | 14.68 | 14.34 | 2.44E-07 | 4.87E-07 | 2.34E-05 | 7.89E-04 | 8.35E-01 | 4.51E-01 | 9.08E-01 |
| 506.28951 | 27.57  | 13.58 | 17.90 | 16.03 | 16.25 | 6.68E-26 | 3.67E-14 | 4.87E-11 | 4.85E-12 | 1.34E-06 | 5.14E-05 | 9.25E-01 |
| 506.36027 | 27.2   | 18.45 | 18.62 | 18.39 | 18.18 | 6.14E-02 | 6.87E-01 | 9.81E-01 | 3.01E-01 | 4.69E-01 | 3.34E-02 | 5.34E-01 |
| 506.50712 | 70.66  | 9.56  | 15.16 | 14.70 | 14.31 | 1.03E-38 | 3.65E-14 | 3.65E-14 | 3.87E-14 | 6.36E-01 | 1.50E-01 | 7.61E-01 |
| 506.61607 | 48.57  | 20.38 | 20.29 | 20.09 | 19.93 | 2.09E-01 | 9.80E-01 | 5.47E-01 | 2.03E-01 | 8.03E-01 | 4.15E-01 | 9.07E-01 |
| 506.70271 | 46.08  | 17.23 | 19.71 | 19.72 | 19.26 | 1.73E-40 | 3.65E-14 | 3.65E-14 | 4.21E-14 | 1.00E+00 | 5.64E-02 | 5.06E-02 |
| 506.75688 | 62.58  | 13.38 | 14.43 | 14.67 | 15.73 | 1.98E-06 | 4.98E-02 | 8.63E-03 | 3.37E-07 | 9.43E-01 | 1.56E-02 | 6.56E-02 |
| 506.78982 | 35.82  | 15.79 | 16.44 | 13.01 | 15.16 | 2.36E-13 | 4.09E-01 | 1.04E-09 | 4.61E-01 | 5.16E-13 | 2.23E-02 | 1.16E-05 |
| 506.82366 | 45.35  | 16.23 | 15.98 | 11.90 | 12.62 | 5.66E-27 | 9.36E-01 | 6.81E-14 | 8.65E-14 | 7.27E-14 | 2.10E-12 | 3.46E-01 |
| 506.83263 | 47.85  | 16.87 | 20.09 | 19.73 | 19.35 | 7.71E-51 | 3.65E-14 | 3.65E-14 | 3.65E-14 | 1.70E-01 | 4.20E-04 | 1.66E-01 |
| 506.89179 | 40.75  | 14.96 | 15.26 | 13.96 | 14.39 | 2.77E-03 | 8.39E-01 | 2.82E-02 | 4.14E-01 | 2.92E-03 | 1.06E-01 | 6.69E-01 |
| 506.99239 | 52.41  | 13.27 | 15.03 | 15.53 | 15.50 | 1.56E-08 | 8.91E-05 | 1.93E-07 | 7.74E-07 | 6.12E-01 | 6.83E-01 | 1.00E+00 |
| 507.00831 | 65.98  | 13.44 | 13.02 | 13.21 | 14.24 | 7.62E-02 | 8.00E-01 | 9.58E-01 | 3.30E-01 | 9.78E-01 | 6.29E-02 | 1.47E-01 |
| 507.07673 | 87.1   | 12.79 | 13.50 | 13.64 | 13.23 | 2.05E-01 | 3.50E-01 | 1.84E-01 | 7.55E-01 | 9.87E-01 | 9.31E-01 | 7.85E-01 |
| 507.12504 | 147.37 | 13.94 | 12.77 | 14.94 | 13.60 | 4.40E-10 | 5.93E-04 | 3.77E-03 | 6.86E-01 | 5.77E-11 | 4.11E-02 | 1.31E-04 |
| 507.26876 | 34.9   | 13.21 | 14.35 | 12.61 | 15.23 | 6.47E-05 | 1.83E-01 | 7.02E-01 | 3.23E-03 | 1.49E-02 | 4.55E-01 | 8.61E-05 |
| 507.29721 | 27.54  | 13.93 | 18.09 | 15.70 | 17.12 | 6.38E-29 | 3.65E-14 | 4.86E-07 | 7.38E-14 | 3.20E-11 | 2.34E-02 | 2.04E-04 |
| 507.32211 | 27.48  | 14.45 | 17.38 | 17.89 | 13.53 | 1.36E-37 | 7.45E-14 | 5.03E-14 | 2.02E-02 | 3.65E-01 | 4.05E-14 | 3.65E-14 |
| 507.58598 | 250.97 | 10.23 | 15.38 | 15.60 | 13.24 | 2.19E-27 | 5.65E-14 | 4.30E-14 | 8.89E-09 | 9.70E-01 | 1.18E-04 | 1.51E-05 |
| 507.70078 | 48.93  | 15.54 | 16.92 | 17.21 | 15.96 | 6.08E-07 | 1.80E-04 | 2.94E-06 | 5.92E-01 | 8.27E-01 | 2.81E-02 | 1.77E-03 |
| 507.79863 | 46.17  | 15.81 | 16.54 | 13.63 | 15.85 | 6.10E-10 | 3.01E-01 | 2.22E-06 | 1.00E+00 | 6.64E-10 | 4.04E-01 | 5.81E-06 |
| 507.83638 | 50.56  | 14.37 | 18.02 | 18.26 | 17.26 | 1.53E-44 | 3.65E-14 | 3.65E-14 | 4.01E-14 | 7.48E-01 | 1.39E-02 | 4.14E-04 |
| 507.99963 | 58.37  | 17.62 | 15.71 | 14.85 | 13.75 | 1.54E-13 | 2.72E-04 | 3.08E-08 | 1.81E-13 | 2.63E-01 | 4.23E-04 | 1.03E-01 |
| 508.08757 | 255.72 | 14.33 | 13.58 | 12.86 | 12.87 | 2.09E-04 | 1.92E-01 | 5.73E-04 | 1.05E-03 | 2.38E-01 | 2.76E-01 | 1.00E+00 |
| 508.1394  | 71.99  | 14.99 | 15.42 | 15.62 | 13.38 | 6.33E-09 | 5.91E-01 | 2.46E-01 | 5.02E-05 | 9.39E-01 | 3.65E-07 | 1.50E-08 |
| 508.30461 | 27.14  | 15.23 | 18.53 | 16.92 | 17.49 | 8.23E-32 | 3.65E-14 | 1.77E-11 | 7.44E-14 | 4.92E-10 | 1.81E-04 | 8.58E-02 |
| 508.33938 | 27.68  | 17.35 | 14.55 | 16.00 | 15.89 | 3.88E-14 | 7.57E-14 | 1.45E-04 | 7.30E-05 | 7.65E-05 | 4.78E-04 | 9.90E-01 |
| 508.37606 | 27.74  | 18.19 | 18.41 | 18.37 | 17.97 | 4.64E-01 | 8.78E-01 | 9.31E-01 | 8.64E-01 | 9.99E-01 | 4.64E-01 | 5.45E-01 |
| 508.56866 | 46.72  | 16.52 | 15.64 | 15.27 | 14.45 | 2.52E-09 | 1.77E-02 | 1.83E-04 | 4.71E-10 | 6.16E-01 | 9.63E-04 | 4.03E-02 |
| 508.61472 | 47.65  | 19.35 | 19.06 | 18.80 | 18.73 | 7.21E-03 | 4.29E-01 | 2.37E-02 | 9.74E-03 | 5.72E-01 | 3.65E-01 | 9.80E-01 |
| 508.69978 | 46.03  | 17.57 | 20.05 | 20.05 | 19.62 | 1.79E-50 | 3.65E-14 | 3.65E-14 | 3.65E-14 | 1.00E+00 | 2.50E-02 | 2.13E-02 |
| 508.79484 | 47.16  | 16.22 | 14.79 | 14.12 | 14.24 | 1.10E-13 | 2.34E-06 | 2.38E-12 | 1.62E-10 | 8.67E-02 | 2.46E-01 | 9.74E-01 |
| 508.80719 | 29.14  | 14.03 | 16.09 | 12.56 | 14.09 | 6.07E-16 | 2.92E-07 | 3.77E-04 | 9.99E-01 | 7.43E-14 | 2.82E-06 | 5.23E-04 |
| 508.8278  | 48.16  | 16.36 | 19.57 | 19.73 | 19.01 | 1.08E-44 | 3.65E-14 | 3.65E-14 | 3.72E-14 | 8.65E-01 | 5.85E-02 | 6.03E-03 |
| 509.01522 | 61.2   | 16.18 | 15.93 | 17.02 | 16.11 | 4.69E-03 | 8.52E-01 | 3.72E-02 | 9.97E-01 | 4.46E-03 | 9.42E-01 | 3.31E-02 |
| 509.09291 | 87.2   | 17.17 | 17.24 | 18.34 | 16.59 | 2.51E-09 | 9.92E-01 | 1.80E-05 | 1.10E-01 | 1.20E-04 | 6.81E-02 | 8.46E-10 |
| 509.37922 | 27.9   | 15.64 | 13.09 | 13.88 | 14.00 | 4.74E-09 | 1.84E-09 | 3.87E-05 | 2.92E-04 | 2.01E-01 | 1.21E-01 | 9.89E-01 |
| 509.69803 | 48.99  | 16.78 | 17.78 | 18.06 | 17.23 | 2.60E-06 | 4.93E-04 | 3.26E-06 | 2.97E-01 | 7.00E-01 | 1.64E-01 | 9.91E-03 |
| 509.83291 | 49.97  | 13.97 | 15.35 | 15.49 | 14.59 | 5.79E-10 | 1.93E-07 | 6.08E-09 | 5.98E-02 | 9.39E-01 | 1.72E-02 | 2.56E-03 |
| 509.92283 | 53.53  | 19.82 | 18.41 | 17.51 | 17.73 | 2.76E-19 | 1.22E-07 | 7.45E-14 | 1.02E-13 | 1.87E-03 | 3.92E-02 | 8.28E-01 |
| 510.35535 | 26.88  | 20.33 | 20.49 | 20.48 | 20.02 | 4.35E-02 | 8.12E-01 | 8.25E-01 | 2.91E-01 | 1.00E+00 | 5.50E-02 | 5.64E-02 |
| 510.45145 | 22.58  | 16.94 | 12.95 | 13.10 | 14.40 | 2.36E-18 | 7.54E-14 | 7.77E-14 | 4.44E-07 | 9.88E-01 | 1.21E-02 | 2.84E-02 |
| 510.56641 | 46.71  | 18.10 | 17.58 | 17.71 | 16.77 | 2.10E-09 | 3.05E-02 | 1.49E-01 | 3.04E-10 | 9.14E-01 | 3.63E-04 | 2.14E-05 |
| 510.61161 | 46.77  | 17.48 | 16.95 | 15.97 | 16.46 | 1.71E-06 | 2.32E-01 | 7.87E-07 | 2.70E-03 | 4.09E-03 | 3.57E-01 | 3.36E-01 |
| 510.70053 | 46.86  | 16.99 | 19.02 | 19.01 | 18.75 | 2.04E-27 | 5.63E-14 | 5.41E-14 | 7.52E-14 | 1.00E+00 | 5.11E-01 | 5.29E-01 |
| 510.75187 | 48.29  | 14.78 | 15.46 | 16.11 | 15.12 | 5.26E-08 | 1.07E-02 | 1.75E-08 | 4.30E-01 | 1.94E-02 | 4.48E-01 | 1.18E-04 |
| 510.78767 | 46.51  | 16.79 | 18.80 | 19.04 | 18.82 | 5.58E-34 | 4.10E-14 | 3.65E-14 | 4.39E-14 | 5.25E-01 | 1.00E+00 | 6.00E-01 |
| 510.82632 | 50.04  | 15.19 | 18.06 | 18.30 | 17.33 | 2.04E-44 | 3.65E-14 | 3.65E-14 | 5.54E-14 | 6.05E-01 | 1.64E-03 | 1.00E-05 |
| 510.91712 | 53.65  | 18.28 | 18.67 | 18.44 | 18.27 | 1.44E-01 | 1.58E-01 | 8.24E-01 | 1.00E+00 | 6.21E-01 | 1.91E-01 | 8.38E-01 |
| 511.07139 | 147.94 | 13.59 | 13.61 | 12.97 | 12.99 | 4.29E-02 | 1.00E+00 | 1.51E-01 | 1.96E-01 | 1.46E-01 | 1.88E-01 | 1.00E+00 |
| 511.09648 | 255.41 | 15.41 | 17.27 | 14.24 | 15.32 | 1.28E-08 | 2.82E-04 | 4.60E-02 | 9.98E-01 | 2.00E-09 | 3.53E-04 | 1.02E-01 |
| 511.11343 | 76.06  | 17.60 | 14.57 | 12.81 | 14.17 | 3.74E-18 | 1.65E-08 | 7.52E-14 | 4.85E-10 | 3.05E-03 | 8.69E-01 | 4.27E-02 |
| 511.3586  | 27.52  | 18.19 | 18.18 | 18.36 | 18.12 | 4.63E-01 | 1.00E+00 | 6.54E-01 | 9.71E-01 | 6.61E-01 | 9.78E-01 | 4.26E-01 |
| 511.69508 | 49.02  | 16.11 | 17.23 | 17.42 | 15.90 | 3.37E-06 | 4.76E-03 | 4.83E-04 | 9.22E-01 | 9.38E-01 | 1.06E-03 | 9.98E-05 |

|           |        |       |       |       |       |          |          |          |          |          |          |          |
|-----------|--------|-------|-------|-------|-------|----------|----------|----------|----------|----------|----------|----------|
| 511.78536 | 49.21  | 15.36 | 17.75 | 18.07 | 17.31 | 1.34E-25 | 7.43E-14 | 4.70E-14 | 4.98E-13 | 5.53E-01 | 3.11E-01 | 1.45E-02 |
| 511.90034 | 51.82  | 19.90 | 18.46 | 19.56 | 17.79 | 2.64E-13 | 1.68E-06 | 5.92E-01 | 6.25E-12 | 5.85E-04 | 9.45E-02 | 1.55E-08 |
| 512.00206 | 83.78  | 14.44 | 16.47 | 15.32 | 14.41 | 4.08E-11 | 6.67E-10 | 1.81E-02 | 1.00E+00 | 1.25E-03 | 3.29E-09 | 2.23E-02 |
| 512.05583 | 189.32 | 8.14  | 12.30 | 12.96 | 12.07 | 5.80E-19 | 3.90E-13 | 7.49E-14 | 1.48E-11 | 5.87E-01 | 9.78E-01 | 3.59E-01 |
| 512.33455 | 28.72  | 16.07 | 14.98 | 14.88 | 14.23 | 1.58E-05 | 1.28E-02 | 4.55E-03 | 5.73E-06 | 9.92E-01 | 1.96E-01 | 3.11E-01 |
| 512.46718 | 22.44  | 15.42 | 8.74  | 10.49 | 10.68 | 6.58E-22 | 6.36E-14 | 3.21E-13 | 8.86E-12 | 3.05E-02 | 1.73E-02 | 9.92E-01 |
| 512.49152 | 53.62  | 14.69 | 15.45 | 15.42 | 13.89 | 2.08E-06 | 6.13E-02 | 6.89E-02 | 5.21E-02 | 1.00E+00 | 1.30E-05 | 1.46E-01 |
| 512.56283 | 46.72  | 18.25 | 17.69 | 17.95 | 17.00 | 1.47E-06 | 5.27E-02 | 5.08E-01 | 4.67E-07 | 6.50E-01 | 1.77E-02 | 3.07E-04 |
| 512.65162 | 46.07  | 19.37 | 20.37 | 20.14 | 19.68 | 1.35E-03 | 1.44E-03 | 2.21E-02 | 6.63E-01 | 8.36E-01 | 7.90E-02 | 3.77E-01 |
| 512.70044 | 47.57  | 15.99 | 16.17 | 15.93 | 16.30 | 3.87E-01 | 8.48E-01 | 9.92E-01 | 5.52E-01 | 7.05E-01 | 9.57E-01 | 4.03E-01 |
| 512.77136 | 276.07 | 14.97 | 16.40 | 15.43 | 14.63 | 1.03E-01 | 1.88E-01 | 9.14E-01 | 9.68E-01 | 5.47E-01 | 9.20E-02 | 7.10E-01 |
| 512.78311 | 46.02  | 16.66 | 18.66 | 18.94 | 18.71 | 2.19E-22 | 7.56E-14 | 7.29E-14 | 7.67E-14 | 6.16E-01 | 9.97E-01 | 7.59E-01 |
| 512.8325  | 45.22  | 13.41 | 16.16 | 13.00 | 12.99 | 4.27E-12 | 2.22E-08 | 7.85E-01 | 7.89E-01 | 3.15E-10 | 1.00E-09 | 1.00E+00 |
| 512.86602 | 25.12  | 10.70 | 16.99 | 9.76  | 15.64 | 4.45E-42 | 3.65E-14 | 1.89E-01 | 7.35E-14 | 3.65E-14 | 3.83E-02 | 4.14E-14 |
| 512.91528 | 51.15  | 18.10 | 19.10 | 19.07 | 19.47 | 8.89E-18 | 1.52E-10 | 2.90E-10 | 7.46E-14 | 9.98E-01 | 5.94E-02 | 3.62E-02 |
| 512.93804 | 276.53 | 13.67 | 16.18 | 15.99 | 14.91 | 1.40E-04 | 3.15E-04 | 8.98E-04 | 1.97E-01 | 9.91E-01 | 2.05E-01 | 3.32E-01 |
| 512.95525 | 59.83  | 15.37 | 15.25 | 14.68 | 13.68 | 1.66E-03 | 9.93E-01 | 4.04E-01 | 1.65E-03 | 6.03E-01 | 6.00E-03 | 1.48E-01 |
| 513.07787 | 101.04 | 13.83 | 15.87 | 12.60 | 15.43 | 3.41E-22 | 1.47E-09 | 4.90E-04 | 4.93E-06 | 7.13E-14 | 5.32E-01 | 7.76E-14 |
| 513.10553 | 275.87 | 11.76 | 15.05 | 15.83 | 13.41 | 1.27E-06 | 1.82E-04 | 1.64E-06 | 1.65E-01 | 7.63E-01 | 1.88E-01 | 1.69E-02 |
| 513.23435 | 50.66  | 11.80 | 11.23 | 14.85 | 13.23 | 1.81E-11 | 6.69E-01 | 1.66E-08 | 2.72E-02 | 9.99E-11 | 1.07E-03 | 1.18E-02 |
| 513.27279 | 275.6  | 14.95 | 14.95 | 15.18 | 14.48 | 5.67E-01 | 1.00E+00 | 9.58E-01 | 7.72E-01 | 9.63E-01 | 7.84E-01 | 4.91E-01 |
| 513.69178 | 48.57  | 14.49 | 15.13 | 14.83 | 14.07 | 1.60E-01 | 4.99E-01 | 8.77E-01 | 8.09E-01 | 9.17E-01 | 1.30E-01 | 3.93E-01 |
| 513.78029 | 49.62  | 14.27 | 17.93 | 18.20 | 17.19 | 1.31E-40 | 3.65E-14 | 3.65E-14 | 5.65E-14 | 7.17E-01 | 3.59E-02 | 1.22E-03 |
| 513.87396 | 27.06  | 12.42 | 17.39 | 12.54 | 16.87 | 1.10E-29 | 6.45E-14 | 9.93E-01 | 7.52E-14 | 7.25E-14 | 7.08E-01 | 7.47E-14 |
| 513.8958  | 45.46  | 18.53 | 17.84 | 17.40 | 15.52 | 9.74E-12 | 2.62E-01 | 1.50E-02 | 2.42E-12 | 6.71E-01 | 1.70E-07 | 2.68E-05 |
| 513.92535 | 48.62  | 14.55 | 12.96 | 13.39 | 14.90 | 9.36E-11 | 5.63E-07 | 4.24E-04 | 6.34E-01 | 4.50E-01 | 6.59E-09 | 7.75E-06 |
| 514.00137 | 79.43  | 13.97 | 13.34 | 14.86 | 12.64 | 5.11E-07 | 3.17E-01 | 8.07E-02 | 3.23E-03 | 5.09E-04 | 2.95E-01 | 2.60E-07 |
| 514.04951 | 42.44  | 14.36 | 13.17 | 12.99 | 14.20 | 2.23E-04 | 8.19E-03 | 1.39E-03 | 9.76E-01 | 9.65E-01 | 4.45E-02 | 1.12E-02 |
| 514.15782 | 277.55 | 14.95 | 15.34 | 15.74 | 14.65 | 1.36E-03 | 4.91E-01 | 2.01E-02 | 7.15E-01 | 4.75E-01 | 8.73E-02 | 1.11E-03 |
| 514.30538 | 27.41  | 14.44 | 19.91 | 18.16 | 18.21 | 1.01E-30 | 3.65E-14 | 7.41E-14 | 7.57E-14 | 1.48E-04 | 4.36E-04 | 9.99E-01 |
| 514.3761  | 24.87  | 13.37 | 14.93 | 11.63 | 16.03 | 5.01E-19 | 1.88E-03 | 3.09E-04 | 3.19E-08 | 7.06E-12 | 7.16E-02 | 7.38E-14 |
| 514.56021 | 46.66  | 17.75 | 17.16 | 17.18 | 16.28 | 2.44E-11 | 8.71E-03 | 9.79E-03 | 1.76E-12 | 1.00E+00 | 5.87E-05 | 3.78E-05 |
| 514.64924 | 46.06  | 20.15 | 21.04 | 20.81 | 20.50 | 4.34E-04 | 3.00E-04 | 1.29E-02 | 4.05E-01 | 7.11E-01 | 8.21E-02 | 5.20E-01 |
| 514.7668  | 51.02  | 16.40 | 9.48  | 10.17 | 10.98 | 5.69E-65 | 3.65E-14 | 3.65E-14 | 3.65E-14 | 1.18E-01 | 2.93E-05 | 5.61E-02 |
| 514.78251 | 47.08  | 15.13 | 15.67 | 16.11 | 16.36 | 8.01E-07 | 7.33E-02 | 8.98E-05 | 1.17E-06 | 2.32E-01 | 2.08E-02 | 7.02E-01 |
| 514.80702 | 28.69  | 12.60 | 18.81 | 16.66 | 17.39 | 8.83E-45 | 3.65E-14 | 4.16E-14 | 3.65E-14 | 3.90E-08 | 8.73E-04 | 1.90E-01 |
| 514.87771 | 36.25  | 17.63 | 16.27 | 15.69 | 16.70 | 3.23E-11 | 2.86E-06 | 9.62E-12 | 3.27E-03 | 1.31E-01 | 4.28E-01 | 1.78E-03 |
| 514.9207  | 43.88  | 13.90 | 16.13 | 16.16 | 16.75 | 9.26E-26 | 7.39E-14 | 7.45E-14 | 4.67E-14 | 9.99E-01 | 7.89E-02 | 1.00E-01 |
| 514.99567 | 52.35  | 15.17 | 15.73 | 16.16 | 14.55 | 1.62E-08 | 1.11E-01 | 3.99E-04 | 6.91E-02 | 3.17E-01 | 5.96E-05 | 1.38E-08 |
| 515.02525 | 62.5   | 17.06 | 17.08 | 17.54 | 16.43 | 9.54E-03 | 1.00E+00 | 3.83E-01 | 1.89E-01 | 4.57E-01 | 1.86E-01 | 3.54E-03 |
| 515.14335 | 292.93 | 17.49 | 18.53 | 19.27 | 18.05 | 3.71E-10 | 3.22E-04 | 1.07E-10 | 1.45E-01 | 2.50E-02 | 2.70E-01 | 4.17E-05 |
| 515.21302 | 79.81  | 23.47 | 23.37 | 22.15 | 22.38 | 2.07E-05 | 9.88E-01 | 2.16E-04 | 4.96E-03 | 1.28E-03 | 1.82E-02 | 9.04E-01 |
| 515.21318 | 188.71 | 10.89 | 12.11 | 15.41 | 12.88 | 1.29E-11 | 1.69E-01 | 2.83E-12 | 6.61E-03 | 8.78E-07 | 6.08E-01 | 3.98E-04 |
| 515.31319 | 27.45  | 17.73 | 22.96 | 21.22 | 21.17 | 4.26E-52 | 3.65E-14 | 3.65E-14 | 3.65E-14 | 1.00E-09 | 1.31E-09 | 9.98E-01 |
| 515.49545 | 53.85  | 15.78 | 17.91 | 16.88 | 16.48 | 1.32E-11 | 1.94E-12 | 4.42E-04 | 7.05E-02 | 1.67E-03 | 8.67E-06 | 4.97E-01 |
| 515.64613 | 293.91 | 16.20 | 17.67 | 17.85 | 16.84 | 4.30E-14 | 7.54E-01 | 9.07E-03 | 3.24E-01 | 1.54E-01 | 8.91E-01 | 5.42E-01 |
| 515.64613 | 44.82  | 13.91 | 13.62 | 13.00 | 13.41 | 1.73E-02 | 3.47E-10 | 1.37E-12 | 1.88E-02 | 8.37E-01 | 1.82E-03 | 6.44E-05 |
| 515.77709 | 48.83  | 14.21 | 16.61 | 16.82 | 15.44 | 5.28E-13 | 5.58E-10 | 1.16E-11 | 4.24E-03 | 9.40E-01 | 1.09E-02 | 1.51E-03 |
| 515.81437 | 27.8   | 16.74 | 21.98 | 20.23 | 20.08 | 8.97E-43 | 3.65E-14 | 3.94E-14 | 5.92E-14 | 1.83E-07 | 3.69E-08 | 9.60E-01 |
| 515.86737 | 50.41  | 17.47 | 18.32 | 18.37 | 17.51 | 3.82E-05 | 2.36E-03 | 8.94E-04 | 9.97E-01 | 9.96E-01 | 8.74E-03 | 3.90E-03 |
| 515.95068 | 112.02 | 13.68 | 14.13 | 15.58 | 14.55 | 5.10E-05 | 6.90E-01 | 2.12E-05 | 1.59E-01 | 2.89E-03 | 7.56E-01 | 7.27E-02 |
| 516.0728  | 86.1   | 12.81 | 15.52 | 15.35 | 14.91 | 1.08E-09 | 1.64E-08 | 9.64E-08 | 2.97E-05 | 9.81E-01 | 5.51E-01 | 7.72E-01 |
| 516.14654 | 297.33 | 15.26 | 14.48 | 15.32 | 14.11 | 1.34E-03 | 1.11E-01 | 9.97E-01 | 7.42E-03 | 8.12E-02 | 7.45E-01 | 5.18E-03 |
| 516.21685 | 79.38  | 21.04 | 20.69 | 19.26 | 19.70 | 9.91E-08 | 7.00E-01 | 4.33E-07 | 4.18E-04 | 1.31E-04 | 2.14E-02 | 5.62E-01 |
| 516.30849 | 36.12  | 18.04 | 20.38 | 19.11 | 19.09 | 1.48E-16 | 7.27E-14 | 6.58E-05 | 1.85E-04 | 3.68E-06 | 5.36E-06 | 1.00E+00 |
| 516.49351 | 53.59  | 13.63 | 15.03 | 13.09 | 13.58 | 7.42E-06 | 1.10E-03 | 4.55E-01 | 9.99E-01 | 3.83E-06 | 1.50E-03 | 5.88E-01 |
| 516.55794 | 46.83  | 16.29 | 13.71 | 14.31 | 13.03 | 4.63E-12 | 3.17E-08 | 2.50E-05 | 1.07E-11 | 5.19E-01 | 4.35E-01 | 2.40E-02 |
| 516.6466  | 46.15  | 19.69 | 20.38 | 20.14 | 19.92 | 5.95E-03 | 3.54E-03 | 1.02E-01 | 6.69E-01 | 6.51E-01 | 1.34E-01 | 7.16E-01 |
| 516.69654 | 46.82  | 13.32 | 14.50 | 15.60 | 13.05 | 3.40E-08 | 3.34E-02 | 1.40E-06 | 9.31E-01 | 6.50E-02 | 9.30E-03 | 3.36E-07 |
| 516.73198 | 46.16  | 16.78 | 19.18 | 19.31 | 19.07 | 3.42E-51 | 3.65E-14 | 3.65E-14 | 3.65E-14 | 8.22E-01 | 8.73E-01 | 3.74E-01 |
| 516.83535 | 46.95  | 13.81 | 12.81 | 13.61 | 13.57 | 4.63E-02 | 3.38E-02 | 9.42E-01 | 9.19E-01 | 1.49E-01 | 2.06E-01 | 1.00E+00 |
| 516.85899 | 50.75  | 17.08 | 18.16 | 18.41 | 17.73 | 3.25E-09 | 2.70E-06 | 4.19E-09 | 1.28E-02 | 6.52E-01 | 2.17E-01 | 1.23E-02 |
| 516.94557 | 97.55  | 15.02 | 17.39 | 16.58 | 16.83 | 1.72E-17 | 7.29E-14 | 1.00E-08 | 1.37E-10 | 9.19E-03 | 1.48E-01 | 7.75E-01 |
| 516.97792 | 44.99  | 16.07 | 16.38 | 16.27 | 17.34 | 1.21E-06 | 5.31E-01 | 8.24E-01 | 8.69E-07 | 9.62E-01 | 5.19E-04 | 6.57E-05 |
| 517.2184  | 79.2   | 18.49 | 17.77 | 15.30 | 16.74 | 2.38E-13 | 2.71E-01 | 2.62E-13 | 1.50E-04 | 2.90E-08 | 6.97E-02 | 3.51E-03 |
| 517.30615 | 42.38  | 15.81 | 16.23 | 15.12 | 14.72 | 2.68E-03 | 7.38E-01 | 3.21E-01 | 4.92E-02 | 4.27E-02 | 3.38E-03 | 7.92E-01 |
| 517.73263 | 49.75  | 14.44 | 16.26 | 16.10 | 15.91 | 4.91E-11 | 1.01E-09 | 1.86E-08 | 2.04E-06 | 9.41E-01 | 6.06E-01 | 9.02E-01 |
| 517.86441 | 48.08  | 16.08 | 16.76 | 17.28 | 16.39 | 6.76E-05 | 4.56E-02 | 3.21E-05 | 6.53E-01 | 2.12E-01 | 5.29E-01 | 6.91E-03 |

|           |        |       |       |       |       |          |          |          |          |          |          |          |
|-----------|--------|-------|-------|-------|-------|----------|----------|----------|----------|----------|----------|----------|
| 517.88504 | 23.67  | 14.28 | 10.48 | 15.01 | 11.68 | 2.78E-41 | 3.65E-14 | 5.31E-02 | 7.58E-14 | 3.65E-14 | 5.73E-04 | 5.81E-14 |
| 517.96511 | 60.09  | 16.84 | 14.43 | 16.52 | 15.03 | 1.06E-11 | 4.98E-10 | 7.99E-01 | 7.10E-06 | 1.49E-07 | 3.78E-01 | 4.56E-04 |
| 518.12213 | 92.01  | 16.21 | 15.14 | 14.99 | 15.51 | 2.98E-02 | 7.47E-02 | 2.92E-02 | 4.14E-01 | 9.88E-01 | 8.55E-01 | 6.76E-01 |
| 518.16499 | 97.69  | 14.36 | 15.85 | 13.25 | 15.51 | 3.89E-26 | 4.88E-10 | 3.40E-06 | 4.06E-06 | 4.32E-14 | 4.44E-01 | 7.47E-14 |
| 518.29357 | 33.72  | 12.27 | 17.74 | 15.31 | 15.64 | 8.46E-18 | 7.56E-14 | 3.81E-07 | 4.59E-08 | 1.24E-04 | 2.07E-03 | 9.35E-01 |
| 518.3221  | 39.25  | 21.27 | 21.97 | 22.28 | 21.29 | 1.31E-10 | 1.17E-04 | 9.28E-09 | 9.99E-01 | 2.57E-01 | 5.39E-04 | 1.29E-07 |
| 518.60134 | 47.9   | 17.06 | 16.74 | 16.62 | 16.17 | 2.59E-05 | 2.61E-01 | 5.15E-02 | 5.63E-06 | 8.96E-01 | 9.71E-03 | 6.27E-02 |
| 518.64407 | 46.32  | 18.30 | 18.81 | 18.55 | 18.45 | 6.50E-02 | 3.82E-02 | 5.51E-01 | 8.63E-01 | 5.32E-01 | 2.83E-01 | 9.63E-01 |
| 518.69371 | 46.69  | 13.65 | 13.38 | 14.60 | 12.89 | 1.14E-04 | 8.81E-01 | 3.82E-02 | 1.68E-01 | 5.68E-03 | 5.63E-01 | 5.09E-05 |
| 518.73302 | 47     | 17.65 | 19.43 | 19.55 | 19.43 | 1.25E-44 | 3.65E-14 | 3.65E-14 | 3.65E-14 | 7.30E-01 | 1.00E+00 | 7.58E-01 |
| 518.74187 | 48.86  | 15.04 | 15.05 | 14.41 | 16.10 | 8.79E-03 | 1.00E+00 | 5.12E-01 | 1.22E-01 | 5.25E-01 | 1.48E-01 | 3.46E-03 |
| 518.78689 | 47.18  | 14.33 | 15.48 | 14.87 | 15.06 | 1.20E-01 | 7.66E-02 | 6.62E-01 | 4.44E-01 | 5.94E-01 | 8.36E-01 | 9.82E-01 |
| 518.85819 | 48.25  | 15.43 | 17.79 | 18.06 | 17.08 | 1.27E-31 | 4.16E-14 | 3.65E-14 | 4.08E-13 | 5.38E-01 | 5.80E-03 | 3.30E-05 |
| 518.99474 | 42.25  | 14.65 | 13.65 | 13.66 | 15.58 | 1.74E-06 | 4.17E-02 | 4.22E-02 | 8.01E-02 | 1.00E+00 | 1.47E-05 | 1.38E-05 |
| 519.04958 | 84.33  | 15.47 | 14.81 | 17.39 | 14.31 | 2.78E-12 | 3.29E-01 | 9.37E-06 | 2.17E-02 | 4.74E-09 | 6.25E-01 | 1.02E-11 |
| 519.05273 | 221.61 | 11.98 | 14.36 | 15.62 | 13.58 | 3.10E-17 | 1.09E-08 | 7.32E-14 | 3.29E-04 | 6.97E-03 | 2.12E-01 | 3.51E-06 |
| 519.07543 | 87.64  | 15.49 | 17.55 | 18.55 | 17.01 | 3.24E-37 | 6.49E-14 | 3.65E-14 | 2.47E-12 | 5.98E-06 | 4.20E-02 | 5.51E-12 |
| 519.13928 | 293.95 | 16.89 | 14.60 | 15.03 | 15.09 | 2.15E-23 | 6.12E-14 | 7.47E-14 | 1.15E-13 | 1.99E-01 | 1.34E-01 | 9.94E-01 |
| 519.26766 | 272.16 | 15.68 | 15.18 | 15.42 | 15.39 | 5.58E-01 | 4.72E-01 | 8.76E-01 | 8.47E-01 | 9.02E-01 | 9.40E-01 | 1.00E+00 |
| 519.32545 | 37.21  | 19.32 | 19.87 | 20.14 | 19.07 | 1.16E-08 | 8.77E-03 | 2.06E-05 | 4.98E-01 | 4.46E-01 | 1.10E-04 | 9.73E-08 |
| 519.43541 | 270.75 | 15.32 | 15.09 | 15.14 | 14.73 | 2.62E-01 | 8.57E-01 | 9.20E-01 | 1.89E-01 | 9.99E-01 | 6.31E-01 | 5.25E-01 |
| 519.55554 | 242.58 | 12.13 | 12.03 | 13.74 | 12.22 | 1.82E-05 | 9.94E-01 | 1.45E-04 | 9.96E-01 | 9.01E-05 | 9.66E-01 | 9.17E-04 |
| 519.73047 | 49.53  | 15.45 | 17.20 | 17.23 | 16.96 | 4.15E-18 | 9.46E-14 | 7.87E-14 | 9.59E-11 | 9.99E-01 | 6.70E-01 | 5.81E-01 |
| 519.82889 | 34.66  | 12.74 | 17.31 | 15.10 | 12.88 | 2.69E-23 | 6.94E-14 | 5.36E-07 | 9.90E-01 | 6.54E-06 | 7.41E-14 | 9.96E-06 |
| 520.03892 | 57.32  | 14.84 | 15.06 | 15.07 | 16.60 | 7.57E-05 | 9.47E-01 | 9.35E-01 | 9.41E-05 | 1.00E+00 | 1.24E-03 | 1.27E-03 |
| 520.13879 | 23.8   | 16.30 | 14.85 | 16.16 | 16.20 | 1.54E-04 | 3.06E-04 | 9.76E-01 | 9.93E-01 | 2.03E-03 | 2.00E-03 | 9.99E-01 |
| 520.13908 | 192.42 | 14.24 | 11.87 | 12.65 | 12.36 | 4.57E-07 | 4.05E-07 | 1.17E-03 | 1.39E-04 | 2.74E-01 | 6.96E-01 | 9.12E-01 |
| 520.33981 | 28.1   | 24.36 | 24.75 | 24.48 | 24.28 | 4.01E-02 | 8.76E-02 | 8.98E-01 | 9.60E-01 | 3.63E-01 | 3.62E-02 | 6.64E-01 |
| 520.59921 | 49.28  | 18.24 | 18.37 | 18.36 | 17.60 | 1.13E-02 | 9.49E-01 | 9.57E-01 | 5.95E-02 | 1.00E+00 | 1.82E-02 | 1.87E-02 |
| 520.63824 | 45.43  | 14.47 | 15.10 | 14.71 | 14.59 | 3.31E-01 | 2.79E-01 | 9.06E-01 | 9.89E-01 | 6.91E-01 | 5.07E-01 | 9.87E-01 |
| 520.73239 | 47.22  | 16.02 | 18.04 | 18.19 | 18.14 | 2.11E-30 | 5.81E-14 | 3.92E-14 | 5.14E-14 | 8.44E-01 | 9.53E-01 | 9.93E-01 |
| 520.78067 | 47.71  | 13.34 | 14.08 | 14.77 | 14.36 | 3.29E-04 | 1.24E-01 | 1.39E-04 | 1.65E-02 | 1.84E-01 | 8.51E-01 | 6.55E-01 |
| 520.82315 | 46.6   | 16.40 | 17.71 | 17.83 | 17.78 | 7.52E-16 | 4.11E-11 | 5.48E-13 | 1.37E-11 | 9.20E-01 | 9.84E-01 | 9.94E-01 |
| 520.85476 | 50.49  | 13.83 | 13.72 | 13.72 | 13.02 | 9.70E-02 | 9.89E-01 | 9.86E-01 | 9.02E-02 | 1.00E+00 | 1.98E-01 | 2.00E-01 |
| 520.88938 | 41.53  | 15.49 | 17.64 | 18.36 | 16.60 | 1.16E-37 | 4.45E-14 | 3.65E-14 | 1.19E-07 | 1.11E-03 | 1.89E-06 | 7.42E-14 |
| 520.94419 | 55.12  | 20.04 | 19.65 | 18.96 | 18.50 | 7.86E-08 | 4.34E-01 | 2.16E-04 | 1.68E-07 | 4.87E-02 | 2.68E-04 | 3.49E-01 |
| 521.03312 | 44.38  | 17.75 | 19.38 | 19.21 | 19.08 | 1.79E-18 | 7.56E-14 | 1.73E-13 | 4.82E-11 | 7.87E-01 | 3.82E-01 | 8.97E-01 |
| 521.06666 | 282.91 | 12.18 | 17.40 | 18.17 | 17.72 | 9.25E-19 | 1.32E-12 | 7.41E-14 | 3.09E-13 | 6.76E-01 | 9.69E-01 | 9.20E-01 |
| 521.10083 | 228.64 | 11.15 | 14.83 | 14.67 | 13.50 | 5.91E-18 | 7.34E-14 | 8.38E-14 | 5.53E-07 | 9.82E-01 | 1.39E-02 | 3.67E-02 |
| 521.13556 | 25.89  | 15.21 | 11.64 | 14.52 | 14.66 | 2.19E-08 | 2.88E-08 | 6.33E-01 | 7.97E-01 | 1.74E-05 | 1.26E-05 | 9.96E-01 |
| 521.19747 | 27.74  | 15.59 | 18.48 | 17.82 | 18.35 | 1.60E-56 | 3.65E-14 | 3.65E-14 | 3.65E-14 | 8.32E-05 | 8.17E-01 | 3.76E-03 |
| 521.33447 | 28.2   | 14.13 | 14.47 | 12.23 | 13.18 | 4.86E-09 | 7.83E-01 | 9.54E-07 | 4.49E-02 | 2.09E-08 | 3.88E-03 | 5.71E-02 |
| 521.34322 | 27.74  | 22.54 | 22.91 | 22.75 | 22.32 | 9.50E-03 | 1.44E-01 | 6.23E-01 | 5.80E-01 | 7.94E-01 | 7.11E-03 | 8.28E-02 |
| 521.72793 | 49.74  | 13.65 | 15.50 | 15.44 | 15.07 | 2.07E-08 | 2.71E-07 | 5.76E-07 | 1.95E-04 | 9.97E-01 | 5.99E-01 | 7.12E-01 |
| 521.81359 | 48.1   | 14.92 | 17.43 | 17.77 | 16.96 | 4.35E-31 | 4.76E-14 | 3.65E-14 | 7.37E-14 | 4.34E-01 | 1.92E-01 | 3.28E-03 |
| 521.84167 | 26.61  | 13.87 | 12.76 | 15.62 | 11.60 | 1.68E-16 | 4.09E-02 | 1.73E-04 | 1.47E-06 | 8.74E-10 | 4.31E-02 | 7.38E-14 |
| 521.94058 | 54.21  | 19.18 | 21.18 | 20.98 | 20.35 | 1.59E-15 | 1.17E-13 | 4.56E-12 | 1.94E-05 | 8.54E-01 | 6.75E-03 | 5.97E-02 |
| 522.0353  | 41.36  | 14.29 | 15.06 | 14.82 | 14.90 | 2.58E-02 | 2.11E-02 | 1.88E-01 | 1.10E-01 | 8.10E-01 | 9.48E-01 | 9.89E-01 |
| 522.12057 | 70.39  | 17.18 | 17.95 | 18.82 | 17.85 | 1.32E-12 | 9.48E-04 | 1.60E-13 | 7.80E-03 | 1.88E-04 | 9.61E-01 | 3.60E-05 |
| 522.15744 | 71.81  | 12.53 | 14.87 | 13.76 | 14.96 | 1.61E-11 | 1.67E-09 | 3.04E-03 | 9.58E-10 | 1.30E-02 | 9.94E-01 | 7.24E-03 |
| 522.20268 | 136.69 | 14.66 | 16.39 | 16.41 | 15.44 | 5.11E-07 | 7.99E-06 | 5.13E-06 | 1.30E-01 | 1.00E+00 | 5.20E-02 | 4.36E-02 |
| 522.34534 | 27.63  | 17.48 | 18.26 | 18.05 | 17.92 | 4.03E-04 | 2.03E-04 | 1.13E-02 | 1.03E-01 | 6.79E-01 | 2.91E-01 | 9.00E-01 |
| 522.35536 | 26.86  | 23.98 | 24.01 | 23.62 | 23.34 | 6.06E-04 | 9.98E-01 | 1.70E-01 | 2.30E-03 | 1.33E-01 | 1.79E-03 | 4.00E-01 |
| 522.59557 | 52.83  | 18.71 | 18.57 | 18.50 | 18.15 | 2.45E-02 | 8.58E-01 | 6.32E-01 | 1.30E-02 | 9.81E-01 | 1.20E-01 | 2.44E-01 |
| 522.67981 | 45.96  | 19.20 | 20.67 | 20.46 | 20.27 | 3.22E-14 | 4.41E-13 | 2.35E-10 | 2.45E-07 | 6.87E-01 | 1.68E-01 | 7.47E-01 |
| 522.80628 | 50.03  | 16.63 | 18.46 | 18.79 | 17.93 | 2.44E-17 | 2.54E-12 | 7.41E-14 | 1.36E-06 | 5.06E-01 | 1.54E-01 | 3.33E-03 |
| 522.81872 | 45.86  | 13.38 | 15.74 | 15.56 | 15.74 | 1.30E-10 | 1.70E-08 | 1.69E-07 | 3.92E-08 | 9.64E-01 | 1.00E+00 | 9.66E-01 |
| 522.87243 | 267.29 | 12.92 | 15.96 | 16.96 | 15.45 | 6.39E-20 | 2.62E-12 | 7.11E-14 | 1.15E-08 | 6.52E-02 | 6.23E-01 | 1.91E-03 |
| 522.88799 | 41.48  | 13.18 | 14.27 | 15.62 | 13.68 | 1.99E-12 | 3.16E-03 | 1.02E-12 | 4.02E-01 | 2.29E-04 | 2.82E-01 | 8.23E-08 |
| 522.93996 | 59.29  | 16.83 | 17.48 | 16.67 | 16.61 | 2.17E-02 | 1.30E-01 | 9.48E-01 | 8.78E-01 | 4.13E-02 | 2.91E-02 | 9.96E-01 |
| 523.03331 | 49.48  | 15.65 | 15.33 | 14.41 | 15.30 | 3.46E-02 | 8.82E-01 | 2.18E-02 | 8.61E-01 | 1.64E-01 | 1.00E+00 | 2.06E-01 |
| 523.04789 | 53.64  | 22.66 | 24.27 | 24.15 | 23.93 | 5.00E-19 | 7.52E-14 | 8.16E-14 | 1.04E-10 | 9.17E-01 | 2.72E-01 | 6.32E-01 |
| 523.0727  | 269.18 | 15.55 | 16.91 | 17.88 | 16.36 | 5.00E-10 | 3.30E-04 | 1.05E-10 | 8.70E-02 | 2.44E-02 | 3.89E-01 | 1.07E-04 |
| 523.10489 | 61.34  | 18.21 | 19.82 | 20.21 | 19.54 | 3.50E-22 | 8.20E-14 | 6.36E-14 | 2.24E-10 | 1.71E-01 | 4.93E-01 | 3.98E-03 |
| 523.15423 | 72.14  | 15.31 | 17.09 | 15.73 | 16.54 | 2.95E-07 | 4.56E-07 | 5.37E-01 | 1.22E-03 | 2.95E-04 | 3.77E-01 | 7.78E-02 |
| 523.24074 | 33.08  | 14.13 | 18.56 | 18.40 | 18.05 | 1.59E-52 | 3.65E-14 | 3.65E-14 | 3.65E-14 | 9.20E-01 | 2.01E-01 | 5.19E-01 |
| 523.27356 | 266.76 | 16.04 | 15.88 | 17.07 | 15.67 | 3.14E-07 | 9.22E-01 | 1.67E-04 | 4.72E-01 | 2.18E-05 | 8.51E-01 | 8.18E-07 |
| 523.29869 | 28.94  | 16.88 | 9.96  | 10.48 | 12.15 | 2.80E-19 | 7.49E-14 | 7.80E-14 | 1.15E-08 | 9.04E-01 | 2.76E-02 | 1.36E-01 |

|           |        |       |       |       |       |          |          |          |          |          |          |          |
|-----------|--------|-------|-------|-------|-------|----------|----------|----------|----------|----------|----------|----------|
| 523.35018 | 27.11  | 12.69 | 13.68 | 13.37 | 13.42 | 1.17E-01 | 9.29E-02 | 3.71E-01 | 3.29E-01 | 8.90E-01 | 9.42E-01 | 9.99E-01 |
| 523.35869 | 27.15  | 22.16 | 22.11 | 21.79 | 21.34 | 2.72E-04 | 9.94E-01 | 2.33E-01 | 3.49E-04 | 3.90E-01 | 1.41E-03 | 1.24E-01 |
| 523.47372 | 266.38 | 13.21 | 15.09 | 16.48 | 14.91 | 1.46E-18 | 7.65E-08 | 7.22E-14 | 2.94E-06 | 2.01E-04 | 9.44E-01 | 2.85E-05 |
| 523.48139 | 53.45  | 14.40 | 16.62 | 16.03 | 14.73 | 4.38E-09 | 4.89E-08 | 7.80E-05 | 8.26E-01 | 4.13E-01 | 1.51E-05 | 4.97E-03 |
| 523.54895 | 55.7   | 13.99 | 15.56 | 14.24 | 15.20 | 2.19E-05 | 8.58E-05 | 8.87E-01 | 5.28E-03 | 2.00E-03 | 7.81E-01 | 5.01E-02 |
| 523.67449 | 268.68 | 14.03 | 15.02 | 16.00 | 15.25 | 6.46E-07 | 2.11E-02 | 1.17E-07 | 3.16E-03 | 2.79E-02 | 9.16E-01 | 1.62E-01 |
| 523.67525 | 46.38  | 16.36 | 15.31 | 14.72 | 15.57 | 1.56E-06 | 2.55E-03 | 3.49E-07 | 4.97E-02 | 2.08E-01 | 8.31E-01 | 3.11E-02 |
| 523.80652 | 45.56  | 16.99 | 17.52 | 17.69 | 16.63 | 1.38E-05 | 7.02E-02 | 7.19E-03 | 3.86E-01 | 8.77E-01 | 8.55E-04 | 3.78E-05 |
| 523.87366 | 270.22 | 15.46 | 14.55 | 15.36 | 14.32 | 7.43E-04 | 2.62E-02 | 9.90E-01 | 3.59E-03 | 6.90E-02 | 9.03E-01 | 1.20E-02 |
| 523.93324 | 52.21  | 18.01 | 19.83 | 19.71 | 19.11 | 1.97E-14 | 8.45E-13 | 1.34E-11 | 3.74E-05 | 9.54E-01 | 1.68E-02 | 6.33E-02 |
| 523.97341 | 59.62  | 17.28 | 13.06 | 15.36 | 13.05 | 8.51E-14 | 1.56E-11 | 4.38E-03 | 4.55E-11 | 6.10E-04 | 1.00E+00 | 8.46E-04 |
| 524.00788 | 86.07  | 15.15 | 17.65 | 16.72 | 16.49 | 1.03E-17 | 7.26E-14 | 9.75E-09 | 2.81E-06 | 2.03E-03 | 1.16E-04 | 8.23E-01 |
| 524.05203 | 54.15  | 19.06 | 20.59 | 20.34 | 20.28 | 4.28E-12 | 3.58E-11 | 2.40E-08 | 3.12E-07 | 6.43E-01 | 4.97E-01 | 9.93E-01 |
| 524.2982  | 33.2   | 17.66 | 14.62 | 14.35 | 16.06 | 2.03E-18 | 1.18E-13 | 7.26E-14 | 1.63E-04 | 8.87E-01 | 1.29E-03 | 6.84E-05 |
| 524.37086 | 28.68  | 25.29 | 25.68 | 25.53 | 25.20 | 1.27E-02 | 5.28E-02 | 3.92E-01 | 9.50E-01 | 7.62E-01 | 1.87E-02 | 1.86E-01 |
| 524.54358 | 47.54  | 16.25 | 14.78 | 14.26 | 14.27 | 1.23E-08 | 1.89E-04 | 1.45E-07 | 5.03E-07 | 4.66E-01 | 5.22E-01 | 1.00E+00 |
| 524.59397 | 50.28  | 17.65 | 17.71 | 17.59 | 17.18 | 9.45E-02 | 9.92E-01 | 9.89E-01 | 1.44E-01 | 9.37E-01 | 9.24E-02 | 2.80E-01 |
| 524.67736 | 46.06  | 19.57 | 21.01 | 20.81 | 20.62 | 4.65E-14 | 6.35E-13 | 2.72E-10 | 2.80E-07 | 7.13E-01 | 1.82E-01 | 7.46E-01 |
| 524.80232 | 49.53  | 17.31 | 18.74 | 18.98 | 18.20 | 1.78E-13 | 9.95E-10 | 9.04E-13 | 4.10E-04 | 6.99E-01 | 7.88E-02 | 3.30E-03 |
| 524.86621 | 32.94  | 9.97  | 16.90 | 10.34 | 16.37 | 7.30E-39 | 3.65E-14 | 8.97E-01 | 4.16E-14 | 3.87E-14 | 7.89E-01 | 6.34E-14 |
| 524.94756 | 269.08 | 11.54 | 15.24 | 13.35 | 13.87 | 1.99E-06 | 4.27E-07 | 3.17E-02 | 4.03E-03 | 3.03E-02 | 2.13E-01 | 8.78E-01 |
| 525.04329 | 53.13  | 20.16 | 21.76 | 21.70 | 21.32 | 2.96E-20 | 7.64E-14 | 7.45E-14 | 8.91E-10 | 9.81E-01 | 6.74E-02 | 1.50E-01 |
| 525.3744  | 28.48  | 23.42 | 23.86 | 23.75 | 23.09 | 4.22E-04 | 8.27E-02 | 2.75E-01 | 2.93E-01 | 9.36E-01 | 5.74E-04 | 4.06E-03 |
| 525.67286 | 47.15  | 17.24 | 16.84 | 16.66 | 16.97 | 9.02E-02 | 3.09E-01 | 6.06E-02 | 6.64E-01 | 8.82E-01 | 9.52E-01 | 5.93E-01 |
| 525.75256 | 272.01 | 14.82 | 13.56 | 14.90 | 14.31 | 3.13E-03 | 7.32E-03 | 9.96E-01 | 5.83E-01 | 4.58E-03 | 2.60E-01 | 4.66E-01 |
| 525.80345 | 47.45  | 14.17 | 15.03 | 14.94 | 14.21 | 2.00E-02 | 6.26E-02 | 1.16E-01 | 1.00E+00 | 9.93E-01 | 1.09E-01 | 1.85E-01 |
| 525.87167 | 28.17  | 14.94 | 19.43 | 16.27 | 19.06 | 9.61E-44 | 3.65E-14 | 2.27E-05 | 3.65E-14 | 6.23E-14 | 5.97E-01 | 7.49E-14 |
| 525.89626 | 53.15  | 19.40 | 18.23 | 17.90 | 17.33 | 7.85E-15 | 6.23E-06 | 3.28E-09 | 8.25E-14 | 5.16E-01 | 1.98E-03 | 9.68E-02 |
| 526.04689 | 53.78  | 15.84 | 17.67 | 17.32 | 17.17 | 6.19E-15 | 1.08E-13 | 4.18E-10 | 5.94E-08 | 3.97E-01 | 1.38E-01 | 9.18E-01 |
| 526.29146 | 27.83  | 20.17 | 19.79 | 20.20 | 19.14 | 9.58E-06 | 2.86E-01 | 9.99E-01 | 3.26E-05 | 2.53E-01 | 2.57E-02 | 3.21E-05 |
| 526.31124 | 32.52  | 17.97 | 18.57 | 15.90 | 18.01 | 8.61E-14 | 2.55E-01 | 3.68E-09 | 9.99E-01 | 3.60E-13 | 3.64E-01 | 1.48E-08 |
| 526.37707 | 28.03  | 20.81 | 21.38 | 21.18 | 20.67 | 1.12E-03 | 1.30E-02 | 1.97E-01 | 8.86E-01 | 7.07E-01 | 2.23E-03 | 5.08E-02 |
| 526.4865  | 53.81  | 15.93 | 17.57 | 16.15 | 16.39 | 1.41E-06 | 1.25E-06 | 8.77E-01 | 4.47E-01 | 6.28E-05 | 2.06E-03 | 8.78E-01 |
| 526.54044 | 46.12  | 17.69 | 16.91 | 17.09 | 16.30 | 2.70E-07 | 3.72E-03 | 3.74E-02 | 4.34E-08 | 8.73E-01 | 5.18E-02 | 5.45E-03 |
| 526.55942 | 256    | 12.16 | 11.79 | 13.41 | 11.74 | 7.36E-04 | 8.35E-01 | 2.23E-02 | 7.80E-01 | 2.14E-03 | 9.99E-01 | 1.89E-03 |
| 526.59278 | 49.05  | 16.12 | 14.23 | 14.39 | 14.86 | 1.63E-09 | 1.10E-08 | 1.48E-07 | 4.00E-04 | 9.51E-01 | 1.93E-01 | 4.44E-01 |
| 526.67511 | 46.09  | 18.69 | 20.02 | 19.84 | 19.67 | 3.23E-12 | 2.94E-11 | 5.41E-09 | 1.86E-06 | 7.82E-01 | 2.83E-01 | 8.14E-01 |
| 526.72526 | 46.83  | 13.81 | 15.54 | 16.20 | 13.95 | 2.69E-19 | 3.74E-09 | 7.44E-14 | 9.60E-01 | 8.06E-02 | 3.26E-07 | 4.55E-13 |
| 526.76459 | 47.18  | 16.97 | 18.46 | 18.60 | 18.83 | 3.36E-21 | 3.17E-13 | 7.58E-14 | 7.43E-14 | 8.84E-01 | 2.47E-01 | 6.50E-01 |
| 526.80445 | 40.3   | 16.51 | 18.07 | 17.79 | 17.65 | 1.28E-17 | 7.41E-14 | 3.94E-12 | 1.88E-09 | 3.72E-01 | 9.61E-02 | 8.70E-01 |
| 526.88627 | 41.42  | 17.75 | 20.05 | 19.01 | 19.87 | 6.16E-24 | 6.21E-14 | 4.06E-08 | 7.56E-14 | 1.64E-05 | 8.43E-01 | 8.42E-04 |
| 526.95277 | 304.99 | 14.64 | 15.35 | 12.28 | 12.83 | 2.92E-23 | 7.44E-02 | 1.88E-13 | 3.12E-08 | 7.14E-14 | 2.02E-13 | 2.77E-01 |
| 527.00739 | 79.44  | 13.55 | 18.15 | 16.59 | 15.93 | 1.10E-18 | 7.42E-14 | 5.50E-10 | 3.67E-06 | 4.88E-03 | 3.35E-05 | 4.99E-01 |
| 527.03921 | 53.76  | 14.19 | 16.54 | 15.99 | 15.99 | 1.17E-06 | 1.40E-06 | 2.95E-04 | 5.18E-04 | 6.19E-01 | 6.45E-01 | 1.00E+00 |
| 527.05706 | 37.83  | 13.28 | 13.26 | 16.01 | 12.29 | 1.79E-13 | 1.00E+00 | 1.36E-08 | 1.30E-01 | 3.27E-08 | 1.63E-01 | 4.49E-13 |
| 527.05746 | 265.25 | 15.49 | 15.54 | 14.80 | 14.11 | 1.73E-04 | 9.99E-01 | 1.71E-01 | 6.08E-04 | 1.45E-01 | 5.62E-04 | 2.23E-01 |
| 527.15962 | 136    | 12.81 | 17.87 | 17.18 | 15.90 | 4.91E-17 | 7.52E-14 | 1.20E-12 | 1.25E-06 | 6.30E-01 | 6.18E-03 | 1.38E-01 |
| 527.16276 | 275.33 | 10.46 | 16.56 | 15.74 | 14.18 | 1.54E-20 | 7.34E-14 | 7.76E-14 | 5.46E-08 | 5.49E-01 | 1.43E-03 | 6.90E-02 |
| 527.29532 | 26.51  | 18.26 | 17.08 | 18.18 | 17.53 | 4.11E-06 | 1.70E-05 | 9.88E-01 | 2.04E-02 | 1.11E-04 | 3.20E-01 | 5.68E-01 |
| 527.31339 | 29.36  | 16.85 | 21.76 | 19.98 | 19.91 | 1.43E-32 | 3.65E-14 | 7.36E-14 | 7.43E-14 | 3.10E-06 | 2.96E-06 | 9.98E-01 |
| 527.38084 | 26.89  | 17.46 | 18.51 | 17.98 | 18.48 | 1.71E-06 | 8.28E-06 | 6.90E-02 | 3.16E-05 | 6.85E-02 | 9.98E-01 | 1.16E-01 |
| 527.38567 | 275.11 | 12.63 | 16.27 | 13.07 | 16.19 | 6.08E-13 | 3.07E-09 | 8.57E-01 | 1.70E-08 | 4.14E-07 | 9.99E-01 | 1.64E-06 |
| 527.48433 | 54.52  | 13.75 | 14.85 | 12.66 | 13.38 | 3.52E-06 | 2.78E-02 | 2.87E-02 | 7.94E-01 | 8.31E-07 | 2.71E-03 | 3.07E-01 |
| 527.66921 | 48.34  | 16.41 | 14.46 | 14.27 | 14.29 | 1.35E-08 | 5.93E-06 | 4.28E-07 | 1.32E-06 | 9.64E-01 | 9.73E-01 | 1.00E+00 |
| 527.76236 | 48.6   | 15.39 | 16.61 | 16.92 | 16.49 | 3.17E-05 | 1.56E-03 | 2.72E-05 | 7.30E-03 | 7.86E-01 | 9.86E-01 | 5.90E-01 |
| 527.81462 | 28.03  | 15.17 | 20.80 | 19.06 | 19.33 | 1.44E-47 | 3.65E-14 | 3.65E-14 | 3.65E-14 | 2.74E-07 | 4.07E-05 | 8.16E-01 |
| 527.87512 | 52.22  | 18.51 | 12.20 | 13.65 | 13.02 | 8.42E-36 | 3.65E-14 | 5.47E-14 | 3.83E-14 | 7.89E-03 | 2.94E-01 | 5.22E-01 |
| 527.8909  | 39.43  | 15.69 | 14.82 | 12.82 | 16.13 | 8.00E-10 | 2.84E-01 | 6.70E-08 | 8.18E-01 | 4.99E-04 | 5.78E-02 | 4.05E-09 |
| 528.00636 | 91.96  | 12.30 | 17.89 | 17.21 | 14.75 | 3.03E-39 | 3.65E-14 | 3.65E-14 | 2.74E-09 | 2.68E-01 | 3.10E-13 | 5.85E-09 |
| 528.16251 | 134.86 | 8.29  | 12.06 | 11.61 | 11.37 | 3.64E-13 | 1.02E-11 | 1.31E-09 | 5.83E-08 | 8.20E-01 | 5.71E-01 | 9.69E-01 |
| 528.27465 | 277.67 | 16.14 | 15.36 | 16.49 | 15.65 | 1.67E-02 | 1.50E-01 | 7.64E-01 | 5.67E-01 | 1.53E-02 | 8.79E-01 | 1.30E-01 |
| 528.32042 | 27.37  | 15.98 | 21.05 | 18.99 | 19.42 | 9.04E-46 | 3.65E-14 | 5.32E-14 | 3.72E-14 | 1.44E-11 | 2.49E-07 | 4.31E-01 |
| 528.38667 | 277.8  | 15.55 | 16.34 | 16.41 | 15.81 | 1.11E-01 | 2.17E-01 | 1.45E-01 | 9.23E-01 | 9.98E-01 | 6.16E-01 | 4.98E-01 |
| 528.4982  | 275.73 | 15.47 | 15.41 | 15.83 | 15.22 | 2.76E-01 | 9.98E-01 | 6.13E-01 | 8.58E-01 | 5.20E-01 | 9.36E-01 | 2.19E-01 |
| 528.53785 | 46.22  | 17.83 | 17.26 | 17.29 | 16.34 | 3.33E-07 | 8.54E-02 | 1.07E-01 | 4.52E-08 | 9.99E-01 | 2.32E-03 | 1.38E-03 |
| 528.60922 | 277.55 | 15.10 | 15.82 | 15.67 | 15.30 | 2.01E-01 | 2.06E-01 | 3.99E-01 | 9.48E-01 | 9.79E-01 | 5.49E-01 | 7.79E-01 |
| 528.63019 | 47.33  | 17.04 | 17.76 | 17.74 | 17.26 | 8.66E-06 | 1.02E-04 | 1.31E-04 | 5.53E-01 | 1.00E+00 | 2.30E-02 | 2.83E-02 |
| 528.67327 | 46.31  | 16.94 | 18.01 | 17.79 | 18.00 | 5.31E-14 | 7.87E-12 | 4.48E-08 | 4.33E-11 | 4.19E-01 | 1.00E+00 | 4.96E-01 |

|           |        |       |       |       |       |          |          |          |          |          |          |          |
|-----------|--------|-------|-------|-------|-------|----------|----------|----------|----------|----------|----------|----------|
| 528.72205 | 33.63  | 12.95 | 12.01 | 14.37 | 12.11 | 2.95E-05 | 2.64E-01 | 2.81E-02 | 3.85E-01 | 6.71E-05 | 9.98E-01 | 2.25E-04 |
| 528.76413 | 47.64  | 16.08 | 18.26 | 18.35 | 18.56 | 1.98E-28 | 7.11E-14 | 6.23E-14 | 4.74E-14 | 9.70E-01 | 5.26E-01 | 7.86E-01 |
| 528.82036 | 29.89  | 14.83 | 19.61 | 17.80 | 18.56 | 2.41E-49 | 3.65E-14 | 3.85E-14 | 3.65E-14 | 9.53E-11 | 5.34E-04 | 2.01E-02 |
| 528.88553 | 50.71  | 17.62 | 17.20 | 17.36 | 16.47 | 4.34E-07 | 1.32E-01 | 5.32E-01 | 1.35E-07 | 8.44E-01 | 2.50E-03 | 9.98E-05 |
| 529.00325 | 283.12 | 11.93 | 14.24 | 14.78 | 14.33 | 1.52E-07 | 6.75E-05 | 4.00E-07 | 5.67E-05 | 7.37E-01 | 9.99E-01 | 8.33E-01 |
| 529.00778 | 90.75  | 7.47  | 14.46 | 12.46 | 10.63 | 2.79E-27 | 3.67E-14 | 7.36E-14 | 3.80E-07 | 2.72E-03 | 2.17E-09 | 9.40E-03 |
| 529.02466 | 272.6  | 16.08 | 17.21 | 18.36 | 17.10 | 3.21E-11 | 1.05E-03 | 2.21E-12 | 5.70E-03 | 1.20E-03 | 9.82E-01 | 4.07E-04 |
| 529.05302 | 92     | 11.26 | 12.74 | 10.91 | 13.21 | 1.04E-08 | 1.24E-03 | 8.15E-01 | 1.45E-05 | 5.83E-05 | 6.65E-01 | 4.57E-07 |
| 529.27564 | 273.24 | 16.25 | 17.94 | 19.08 | 17.55 | 4.94E-17 | 1.52E-07 | 7.58E-14 | 1.33E-04 | 1.04E-03 | 5.88E-01 | 7.35E-06 |
| 529.31129 | 26.87  | 15.69 | 15.43 | 15.17 | 13.78 | 2.33E-03 | 9.56E-01 | 7.27E-01 | 1.64E-03 | 9.58E-01 | 1.22E-02 | 4.61E-02 |
| 529.32868 | 27.53  | 16.61 | 22.34 | 20.72 | 20.68 | 5.77E-61 | 3.65E-14 | 3.65E-14 | 3.65E-14 | 5.18E-09 | 8.24E-09 | 9.99E-01 |
| 529.52618 | 271.11 | 14.57 | 17.08 | 17.84 | 16.39 | 2.31E-16 | 2.11E-10 | 7.38E-14 | 9.93E-06 | 1.72E-01 | 2.69E-01 | 9.46E-04 |
| 529.666   | 48.07  | 15.29 | 12.26 | 11.71 | 12.40 | 3.21E-11 | 1.03E-07 | 2.16E-10 | 8.75E-07 | 7.34E-01 | 9.94E-01 | 5.85E-01 |
| 529.76039 | 49.74  | 14.07 | 16.87 | 16.67 | 16.26 | 5.34E-20 | 7.24E-14 | 7.58E-14 | 4.74E-11 | 9.08E-01 | 2.04E-01 | 5.46E-01 |
| 529.77629 | 174.37 | 7.16  | 16.59 | 14.06 | 15.81 | 9.79E-53 | 3.65E-14 | 3.65E-14 | 3.65E-14 | 5.85E-06 | 4.39E-01 | 4.42E-03 |
| 529.83057 | 27.59  | 15.05 | 21.45 | 19.83 | 19.65 | 2.90E-57 | 3.65E-14 | 3.65E-14 | 3.65E-14 | 1.12E-06 | 1.65E-07 | 9.43E-01 |
| 529.87257 | 51.67  | 17.04 | 10.55 | 11.03 | 11.95 | 1.27E-38 | 3.65E-14 | 3.65E-14 | 5.12E-14 | 7.05E-01 | 1.52E-02 | 1.95E-01 |
| 530.02808 | 186.87 | 6.83  | 13.57 | 12.76 | 12.44 | 5.90E-37 | 3.65E-14 | 3.67E-14 | 4.30E-14 | 3.27E-01 | 1.04E-01 | 9.16E-01 |
| 530.02883 | 83.83  | 9.03  | 15.81 | 15.09 | 13.09 | 1.59E-31 | 3.65E-14 | 4.05E-14 | 3.51E-12 | 5.14E-01 | 7.09E-06 | 1.59E-03 |
| 530.11562 | 72.32  | 17.46 | 19.96 | 19.64 | 19.10 | 1.70E-10 | 7.63E-10 | 6.38E-08 | 1.38E-04 | 8.34E-01 | 1.29E-01 | 5.09E-01 |
| 530.28837 | 26.39  | 15.79 | 18.30 | 17.17 | 16.77 | 3.75E-08 | 5.59E-09 | 2.74E-03 | 7.65E-02 | 2.65E-02 | 1.56E-03 | 7.64E-01 |
| 530.32353 | 25.46  | 17.35 | 11.52 | 14.95 | 12.66 | 6.33E-50 | 3.65E-14 | 7.20E-13 | 3.65E-14 | 6.05E-14 | 2.89E-03 | 8.66E-11 |
| 530.3322  | 27.24  | 13.51 | 19.51 | 17.04 | 17.87 | 1.12E-55 | 3.65E-14 | 3.65E-14 | 3.65E-14 | 7.80E-14 | 3.99E-07 | 2.27E-02 |
| 530.53478 | 46.18  | 17.53 | 16.48 | 16.59 | 15.90 | 1.03E-10 | 1.39E-05 | 1.03E-04 | 2.68E-11 | 9.62E-01 | 5.96E-02 | 1.50E-02 |
| 530.62795 | 47.14  | 18.26 | 19.07 | 19.04 | 18.47 | 7.80E-07 | 1.80E-05 | 3.27E-05 | 6.08E-01 | 9.98E-01 | 5.54E-03 | 8.78E-03 |
| 530.76373 | 48.22  | 13.99 | 15.73 | 15.83 | 16.38 | 1.70E-12 | 3.28E-07 | 4.54E-08 | 6.55E-12 | 9.89E-01 | 1.87E-01 | 3.17E-01 |
| 530.84513 | 30.79  | 17.21 | 15.97 | 15.16 | 15.80 | 3.33E-09 | 4.36E-04 | 8.82E-10 | 7.28E-05 | 5.30E-02 | 9.53E-01 | 2.01E-01 |
| 530.89313 | 21.95  | 13.46 | 11.01 | 15.10 | 12.21 | 2.88E-21 | 1.52E-09 | 7.06E-05 | 6.32E-03 | 6.54E-14 | 1.28E-02 | 1.30E-11 |
| 530.96999 | 51.91  | 14.51 | 14.30 | 15.59 | 12.54 | 5.12E-09 | 9.62E-01 | 5.58E-02 | 7.00E-05 | 1.91E-02 | 7.77E-04 | 6.40E-10 |
| 530.99665 | 59.6   | 16.26 | 16.50 | 17.83 | 16.73 | 4.06E-06 | 8.70E-01 | 3.23E-06 | 4.55E-01 | 1.88E-04 | 8.95E-01 | 3.98E-03 |
| 531.12483 | 73.35  | 14.75 | 13.24 | 13.70 | 12.63 | 4.57E-09 | 1.78E-05 | 4.98E-03 | 2.37E-09 | 4.84E-01 | 2.66E-01 | 7.74E-03 |
| 531.13663 | 159.76 | 15.06 | 17.10 | 16.94 | 15.81 | 6.17E-08 | 6.78E-07 | 4.43E-06 | 2.07E-01 | 9.74E-01 | 6.56E-03 | 2.17E-02 |
| 531.27307 | 41.85  | 11.13 | 10.03 | 10.26 | 13.85 | 8.33E-11 | 1.67E-01 | 3.53E-01 | 7.25E-06 | 9.75E-01 | 6.12E-10 | 4.53E-09 |
| 531.29336 | 43.8   | 13.74 | 14.55 | 11.89 | 12.21 | 6.85E-04 | 6.63E-01 | 4.07E-02 | 1.50E-01 | 1.56E-03 | 1.04E-02 | 9.71E-01 |
| 531.32557 | 27.21  | 15.21 | 16.03 | 15.75 | 14.24 | 4.96E-04 | 2.06E-01 | 5.69E-01 | 1.09E-01 | 9.10E-01 | 4.09E-04 | 3.92E-03 |
| 531.46945 | 53.66  | 14.03 | 13.21 | 14.27 | 12.19 | 9.36E-07 | 1.30E-01 | 9.17E-01 | 2.18E-05 | 3.16E-02 | 5.72E-02 | 2.12E-06 |
| 531.75909 | 49.92  | 13.96 | 15.11 | 14.08 | 14.18 | 7.93E-03 | 7.79E-03 | 9.85E-01 | 9.25E-01 | 2.72E-02 | 7.17E-02 | 9.92E-01 |
| 531.84134 | 50.06  | 16.99 | 17.02 | 17.45 | 16.58 | 6.51E-03 | 9.99E-01 | 1.83E-01 | 3.16E-01 | 2.73E-01 | 2.71E-01 | 2.30E-03 |
| 531.96483 | 65.05  | 20.17 | 21.04 | 20.38 | 19.74 | 4.40E-05 | 4.28E-03 | 8.32E-01 | 3.45E-01 | 6.13E-02 | 1.49E-05 | 7.50E-02 |
| 532.12068 | 294.26 | 12.70 | 16.30 | 14.78 | 14.08 | 2.67E-07 | 5.36E-08 | 3.27E-03 | 1.21E-01 | 6.86E-02 | 3.20E-03 | 6.77E-01 |
| 532.13935 | 150.5  | 13.90 | 12.77 | 12.78 | 12.58 | 2.05E-05 | 6.95E-04 | 6.76E-04 | 8.19E-05 | 1.00E+00 | 9.28E-01 | 9.17E-01 |
| 532.18745 | 197.3  | 16.12 | 17.73 | 16.78 | 17.14 | 3.06E-16 | 7.35E-14 | 7.50E-04 | 1.80E-07 | 1.03E-06 | 6.27E-03 | 2.13E-01 |
| 532.27569 | 278.77 | 13.45 | 15.85 | 16.39 | 14.94 | 9.69E-07 | 1.06E-04 | 9.44E-07 | 4.20E-02 | 7.73E-01 | 4.00E-01 | 6.04E-02 |
| 532.27964 | 34.09  | 16.96 | 19.02 | 18.46 | 18.71 | 4.41E-21 | 7.32E-14 | 7.22E-12 | 9.56E-14 | 3.76E-02 | 4.79E-01 | 6.38E-01 |
| 532.41947 | 278.85 | 14.68 | 16.06 | 16.67 | 15.60 | 2.09E-08 | 1.07E-04 | 6.65E-09 | 2.51E-02 | 2.40E-01 | 5.12E-01 | 7.80E-03 |
| 532.5324  | 46.33  | 16.35 | 13.41 | 14.02 | 13.44 | 1.43E-18 | 7.58E-14 | 9.61E-11 | 8.52E-14 | 2.71E-01 | 1.00E+00 | 3.38E-01 |
| 532.56248 | 278.6  | 15.40 | 15.04 | 15.45 | 14.88 | 1.24E-01 | 5.34E-01 | 9.98E-01 | 2.35E-01 | 4.41E-01 | 9.43E-01 | 1.81E-01 |
| 532.62499 | 47.27  | 18.18 | 18.88 | 18.83 | 18.49 | 1.56E-05 | 5.53E-05 | 1.85E-04 | 2.14E-01 | 9.89E-01 | 7.94E-02 | 1.53E-01 |
| 532.67052 | 46.06  | 14.35 | 14.62 | 15.77 | 13.71 | 4.08E-08 | 8.29E-01 | 5.24E-05 | 1.97E-01 | 2.49E-03 | 3.44E-02 | 1.39E-08 |
| 532.70963 | 46.07  | 18.62 | 20.56 | 20.36 | 20.27 | 4.03E-29 | 3.87E-14 | 6.16E-14 | 7.54E-14 | 6.12E-01 | 3.28E-01 | 9.55E-01 |
| 532.80885 | 47.99  | 12.62 | 14.80 | 14.01 | 12.72 | 8.03E-04 | 1.85E-03 | 8.85E-02 | 9.98E-01 | 5.74E-01 | 6.42E-03 | 1.69E-01 |
| 532.83585 | 49.64  | 16.13 | 17.42 | 17.46 | 16.22 | 2.47E-09 | 4.36E-06 | 1.40E-06 | 9.85E-01 | 9.98E-01 | 7.12E-05 | 2.78E-05 |
| 532.96901 | 55.88  | 16.43 | 16.75 | 15.30 | 14.57 | 1.13E-06 | 8.59E-01 | 2.91E-02 | 8.86E-05 | 3.49E-03 | 5.89E-06 | 3.29E-01 |
| 532.99725 | 67.51  | 11.90 | 10.55 | 13.08 | 12.55 | 1.68E-04 | 7.66E-02 | 1.48E-01 | 6.74E-01 | 9.20E-05 | 4.81E-03 | 8.02E-01 |
| 533.06688 | 272.98 | 15.42 | 15.94 | 17.43 | 15.82 | 5.78E-08 | 4.10E-01 | 3.74E-08 | 6.58E-01 | 1.30E-04 | 9.86E-01 | 4.60E-05 |
| 533.12406 | 190.87 | 9.34  | 14.39 | 15.88 | 11.35 | 4.32E-29 | 7.36E-14 | 3.67E-14 | 1.29E-03 | 3.02E-02 | 5.95E-07 | 1.56E-13 |
| 533.28359 | 31.9   | 14.94 | 16.65 | 15.99 | 16.22 | 4.50E-04 | 2.50E-04 | 5.06E-02 | 1.34E-02 | 3.94E-01 | 7.60E-01 | 9.47E-01 |
| 533.66309 | 170.79 | 7.46  | 11.90 | 11.05 | 10.80 | 2.01E-13 | 1.08E-12 | 5.16E-09 | 1.61E-07 | 4.56E-01 | 2.61E-01 | 9.76E-01 |
| 533.70831 | 47.15  | 15.53 | 17.20 | 16.78 | 17.01 | 6.17E-15 | 2.03E-13 | 1.77E-08 | 1.26E-10 | 1.87E-01 | 8.11E-01 | 7.10E-01 |
| 533.8331  | 42.01  | 16.23 | 15.92 | 16.54 | 15.93 | 2.55E-02 | 5.01E-01 | 5.15E-01 | 5.47E-01 | 3.74E-02 | 1.00E+00 | 4.91E-02 |
| 533.86421 | 169.55 | 8.37  | 13.56 | 12.29 | 12.77 | 1.25E-37 | 3.65E-14 | 4.72E-14 | 3.72E-14 | 2.14E-03 | 1.38E-01 | 5.36E-01 |
| 533.96155 | 54.66  | 17.08 | 17.49 | 16.33 | 15.99 | 3.66E-05 | 5.81E-01 | 8.75E-02 | 5.83E-03 | 2.85E-03 | 9.18E-05 | 7.42E-01 |
| 534.03903 | 54.78  | 13.53 | 18.11 | 17.57 | 16.91 | 2.35E-26 | 4.39E-14 | 7.12E-14 | 1.25E-13 | 5.41E-01 | 2.30E-02 | 3.84E-01 |
| 534.06409 | 173.12 | 7.57  | 10.72 | 11.00 | 9.78  | 2.54E-08 | 1.44E-06 | 1.02E-07 | 1.87E-03 | 9.68E-01 | 4.39E-01 | 2.07E-01 |
| 534.12957 | 99.35  | 16.35 | 11.85 | 14.24 | 12.96 | 1.76E-18 | 7.45E-14 | 3.09E-05 | 4.76E-11 | 4.08E-06 | 9.90E-02 | 4.16E-02 |
| 534.2956  | 34.17  | 21.13 | 23.49 | 23.16 | 22.53 | 1.12E-31 | 3.65E-14 | 4.39E-14 | 2.31E-12 | 2.57E-01 | 3.37E-06 | 4.39E-03 |
| 534.47301 | 53.42  | 15.21 | 17.28 | 16.75 | 15.66 | 1.31E-13 | 2.15E-12 | 1.34E-07 | 3.50E-01 | 2.11E-01 | 2.19E-07 | 8.65E-04 |
| 534.57657 | 46.95  | 16.44 | 15.21 | 15.65 | 14.97 | 2.07E-04 | 2.38E-03 | 9.50E-02 | 2.47E-04 | 6.00E-01 | 9.09E-01 | 2.36E-01 |

|           |        |       |       |       |       |          |          |          |          |          |          |          |
|-----------|--------|-------|-------|-------|-------|----------|----------|----------|----------|----------|----------|----------|
| 534.62296 | 47.25  | 17.00 | 17.80 | 17.61 | 17.19 | 1.21E-04 | 2.08E-04 | 6.90E-03 | 7.45E-01 | 7.71E-01 | 1.54E-02 | 1.58E-01 |
| 534.70704 | 46.08  | 18.70 | 20.55 | 20.39 | 20.30 | 9.29E-30 | 3.85E-14 | 5.34E-14 | 7.25E-14 | 7.44E-01 | 3.96E-01 | 9.31E-01 |
| 534.80466 | 46.9   | 14.88 | 13.96 | 13.63 | 13.92 | 2.98E-03 | 4.56E-02 | 2.25E-03 | 4.11E-02 | 7.97E-01 | 1.00E+00 | 8.60E-01 |
| 534.83087 | 65.42  | 15.84 | 18.01 | 17.96 | 16.68 | 1.06E-11 | 1.31E-09 | 2.12E-09 | 5.79E-02 | 9.99E-01 | 9.42E-04 | 1.41E-03 |
| 534.97644 | 39.02  | 14.57 | 15.62 | 15.47 | 15.64 | 1.01E-05 | 9.23E-05 | 9.70E-04 | 9.56E-05 | 9.28E-01 | 1.00E+00 | 8.97E-01 |
| 534.98938 | 41.68  | 14.91 | 15.14 | 15.20 | 17.00 | 2.02E-09 | 8.86E-01 | 7.94E-01 | 5.65E-09 | 9.98E-01 | 5.88E-07 | 1.11E-06 |
| 535.03703 | 54.38  | 14.63 | 15.65 | 14.80 | 15.35 | 9.93E-04 | 1.59E-03 | 9.27E-01 | 5.45E-02 | 1.54E-02 | 7.44E-01 | 2.25E-01 |
| 535.05324 | 97.95  | 17.64 | 11.45 | 15.47 | 13.96 | 5.20E-29 | 3.65E-14 | 1.92E-05 | 1.54E-12 | 8.94E-14 | 3.18E-06 | 1.11E-02 |
| 535.29925 | 33.35  | 19.30 | 21.39 | 21.11 | 20.55 | 2.13E-31 | 3.65E-14 | 4.43E-14 | 2.04E-12 | 3.03E-01 | 6.22E-06 | 5.00E-03 |
| 535.65769 | 293.65 | 16.82 | 19.02 | 19.24 | 17.83 | 3.74E-21 | 7.43E-14 | 7.29E-14 | 4.47E-04 | 8.22E-01 | 4.97E-05 | 8.20E-07 |
| 535.7067  | 48.75  | 14.06 | 17.88 | 17.84 | 17.62 | 2.80E-40 | 3.65E-14 | 3.65E-14 | 3.65E-14 | 9.98E-01 | 7.87E-01 | 8.62E-01 |
| 536.13567 | 59.81  | 17.11 | 17.47 | 18.76 | 18.04 | 1.57E-08 | 5.35E-01 | 1.15E-08 | 4.16E-03 | 2.20E-05 | 1.76E-01 | 5.24E-02 |
| 536.16039 | 280.39 | 15.51 | 13.73 | 14.16 | 15.53 | 2.18E-03 | 9.27E-03 | 7.64E-02 | 1.00E+00 | 8.73E-01 | 1.45E-02 | 9.77E-02 |
| 536.29753 | 35.28  | 16.61 | 19.10 | 18.69 | 18.01 | 2.06E-15 | 8.56E-14 | 4.53E-11 | 2.59E-05 | 5.19E-01 | 2.83E-03 | 1.20E-01 |
| 536.33477 | 27.86  | 15.63 | 16.13 | 14.67 | 14.88 | 2.43E-03 | 6.09E-01 | 9.07E-02 | 2.91E-01 | 3.48E-03 | 2.28E-02 | 9.63E-01 |
| 536.57316 | 49.31  | 17.67 | 18.15 | 18.14 | 16.83 | 4.69E-03 | 5.96E-01 | 6.18E-01 | 1.48E-01 | 1.00E+00 | 7.49E-03 | 7.88E-03 |
| 536.61916 | 46.65  | 15.81 | 14.53 | 14.50 | 14.39 | 3.36E-04 | 4.10E-03 | 2.58E-03 | 1.49E-03 | 1.00E+00 | 9.83E-01 | 9.93E-01 |
| 536.66034 | 297.77 | 15.01 | 15.01 | 14.80 | 14.40 | 9.20E-02 | 1.00E+00 | 8.37E-01 | 9.95E-02 | 8.54E-01 | 1.19E-01 | 4.60E-01 |
| 536.70434 | 46.15  | 17.49 | 19.25 | 19.19 | 19.09 | 1.78E-32 | 3.72E-14 | 3.79E-14 | 5.65E-14 | 9.77E-01 | 7.36E-01 | 9.21E-01 |
| 536.75507 | 47.1   | 12.86 | 14.36 | 15.30 | 13.72 | 2.19E-11 | 3.66E-05 | 5.61E-12 | 5.09E-02 | 2.73E-02 | 2.43E-01 | 3.67E-05 |
| 536.79834 | 47.72  | 16.37 | 17.46 | 17.80 | 17.74 | 4.08E-08 | 1.73E-04 | 2.92E-07 | 2.37E-06 | 5.64E-01 | 7.27E-01 | 9.96E-01 |
| 536.86562 | 24.6   | 9.23  | 16.31 | 9.23  | 15.62 | 4.54E-41 | 3.65E-14 | 1.00E+00 | 4.14E-14 | 3.65E-14 | 6.01E-01 | 4.56E-14 |
| 536.88496 | 41.59  | 14.95 | 14.85 | 16.91 | 15.11 | 3.64E-09 | 9.90E-01 | 1.33E-07 | 9.66E-01 | 7.74E-08 | 8.82E-01 | 6.32E-06 |
| 536.91797 | 53.6   | 19.56 | 19.09 | 19.08 | 18.02 | 1.04E-07 | 2.28E-01 | 1.93E-01 | 2.04E-08 | 1.00E+00 | 2.56E-04 | 2.88E-04 |
| 537.00797 | 59.73  | 16.41 | 14.38 | 14.86 | 14.48 | 3.65E-10 | 6.04E-09 | 9.24E-06 | 7.45E-08 | 4.66E-01 | 9.91E-01 | 6.75E-01 |
| 537.02647 | 42.37  | 14.43 | 16.86 | 18.47 | 16.60 | 4.35E-34 | 7.52E-14 | 3.65E-14 | 7.32E-13 | 8.85E-08 | 7.87E-01 | 1.15E-09 |
| 537.16659 | 29.03  | 20.81 | 19.57 | 20.12 | 20.28 | 4.95E-05 | 1.10E-05 | 3.12E-02 | 1.72E-01 | 1.53E-01 | 4.38E-02 | 9.31E-01 |
| 537.1952  | 77.84  | 20.82 | 21.49 | 18.82 | 20.06 | 8.07E-12 | 2.25E-01 | 9.36E-08 | 1.39E-01 | 6.96E-12 | 7.45E-04 | 3.93E-03 |
| 537.29695 | 32.95  | 7.00  | 15.97 | 14.92 | 13.74 | 8.19E-48 | 3.65E-14 | 3.65E-14 | 3.65E-14 | 1.77E-01 | 2.49E-04 | 1.21E-01 |
| 537.36737 | 24.6   | 12.94 | 15.75 | 10.98 | 15.49 | 3.63E-37 | 8.38E-14 | 3.55E-08 | 5.70E-12 | 3.65E-14 | 8.70E-01 | 3.65E-14 |
| 537.47672 | 53.75  | 16.00 | 17.49 | 15.81 | 16.25 | 1.47E-06 | 2.54E-05 | 9.27E-01 | 8.70E-01 | 2.73E-06 | 1.48E-03 | 5.46E-01 |
| 537.66096 | 304.26 | 15.07 | 18.13 | 18.21 | 17.69 | 2.28E-39 | 3.65E-14 | 3.65E-14 | 4.07E-14 | 9.84E-01 | 2.28E-01 | 1.07E-01 |
| 537.70449 | 51.25  | 15.06 | 17.18 | 17.16 | 16.89 | 1.03E-27 | 5.32E-14 | 5.25E-14 | 7.41E-14 | 1.00E+00 | 4.79E-01 | 5.19E-01 |
| 537.792   | 50.29  | 15.43 | 15.91 | 15.94 | 15.85 | 3.40E-01 | 4.34E-01 | 3.70E-01 | 5.83E-01 | 1.00E+00 | 9.97E-01 | 9.92E-01 |
| 537.87271 | 26.92  | 13.47 | 18.89 | 14.00 | 18.89 | 1.15E-33 | 4.43E-14 | 6.69E-01 | 5.12E-14 | 7.36E-14 | 1.00E+00 | 7.38E-14 |
| 537.91072 | 49.82  | 19.18 | 21.02 | 21.19 | 20.12 | 8.45E-16 | 5.12E-12 | 1.13E-13 | 1.05E-03 | 9.02E-01 | 3.26E-03 | 2.36E-04 |
| 538.02816 | 48.72  | 12.13 | 11.94 | 13.95 | 12.45 | 8.87E-03 | 9.90E-01 | 2.07E-02 | 9.61E-01 | 1.11E-02 | 8.70E-01 | 1.09E-01 |
| 538.08331 | 309.19 | 13.00 | 15.40 | 11.75 | 11.45 | 6.09E-14 | 7.69E-06 | 4.52E-02 | 1.02E-02 | 1.69E-11 | 2.09E-12 | 9.34E-01 |
| 538.12726 | 233.63 | 17.20 | 22.02 | 22.38 | 20.88 | 3.36E-27 | 6.41E-14 | 4.19E-14 | 3.71E-13 | 8.56E-01 | 7.76E-02 | 8.26E-03 |
| 538.16246 | 301.02 | 14.41 | 16.62 | 16.65 | 16.38 | 1.08E-15 | 2.04E-12 | 7.30E-13 | 7.77E-10 | 1.00E+00 | 8.64E-01 | 8.14E-01 |
| 538.16679 | 31.34  | 19.07 | 16.98 | 17.88 | 17.99 | 1.95E-07 | 2.73E-08 | 3.10E-03 | 1.31E-02 | 5.22E-02 | 2.85E-02 | 9.89E-01 |
| 538.19839 | 78.21  | 18.43 | 18.69 | 15.11 | 17.54 | 1.83E-22 | 8.72E-01 | 7.25E-14 | 5.33E-02 | 7.26E-14 | 8.42E-03 | 3.66E-10 |
| 538.30472 | 28.78  | 13.41 | 16.58 | 13.34 | 15.18 | 1.63E-12 | 2.13E-10 | 9.98E-01 | 1.10E-03 | 2.11E-10 | 2.06E-02 | 8.25E-04 |
| 538.3495  | 26.5   | 17.17 | 15.90 | 15.26 | 14.80 | 1.16E-06 | 2.02E-02 | 8.04E-05 | 1.53E-06 | 4.67E-01 | 8.01E-02 | 7.49E-01 |
| 538.38248 | 26.47  | 18.30 | 19.24 | 18.55 | 19.00 | 4.62E-05 | 5.91E-05 | 6.10E-01 | 6.92E-03 | 7.83E-03 | 6.87E-01 | 1.79E-01 |
| 538.53066 | 272.09 | 15.39 | 16.25 | 16.48 | 16.21 | 1.18E-03 | 1.70E-02 | 1.01E-03 | 3.04E-02 | 8.62E-01 | 9.99E-01 | 8.11E-01 |
| 538.57078 | 49.92  | 18.11 | 18.30 | 18.35 | 17.39 | 3.48E-03 | 9.00E-01 | 8.03E-01 | 4.65E-02 | 9.97E-01 | 8.83E-03 | 4.28E-03 |
| 538.61151 | 45.01  | 14.95 | 12.60 | 13.66 | 12.39 | 1.21E-04 | 7.62E-04 | 1.40E-01 | 3.17E-04 | 3.17E-01 | 9.89E-01 | 1.94E-01 |
| 538.6595  | 47.14  | 16.93 | 18.45 | 18.42 | 17.83 | 1.12E-13 | 1.08E-11 | 1.68E-11 | 1.42E-04 | 9.99E-01 | 2.26E-02 | 3.11E-02 |
| 538.70454 | 46.88  | 14.19 | 15.95 | 15.90 | 15.74 | 2.46E-08 | 5.91E-07 | 1.07E-06 | 2.47E-05 | 9.98E-01 | 9.23E-01 | 9.65E-01 |
| 538.78112 | 277.96 | 15.10 | 15.72 | 16.48 | 16.22 | 1.81E-03 | 3.50E-01 | 1.43E-03 | 2.12E-02 | 1.98E-01 | 5.98E-01 | 9.06E-01 |
| 538.79769 | 46.4   | 13.35 | 16.53 | 16.70 | 16.64 | 8.54E-14 | 5.31E-10 | 4.17E-11 | 4.02E-10 | 9.84E-01 | 9.96E-01 | 9.99E-01 |
| 538.83576 | 23.49  | 14.12 | 13.82 | 15.03 | 13.34 | 2.37E-04 | 8.51E-01 | 6.26E-02 | 1.70E-01 | 8.34E-03 | 6.07E-01 | 1.11E-04 |
| 538.8809  | 27.34  | 14.09 | 18.45 | 16.10 | 18.58 | 1.27E-40 | 3.65E-14 | 3.81E-10 | 3.65E-14 | 2.33E-12 | 9.76E-01 | 6.16E-13 |
| 538.91446 | 52.17  | 16.75 | 17.47 | 17.54 | 16.25 | 2.09E-05 | 5.21E-02 | 2.62E-02 | 2.94E-01 | 9.96E-01 | 2.89E-04 | 1.03E-04 |
| 539.01217 | 58.45  | 12.73 | 13.90 | 16.05 | 14.90 | 5.97E-04 | 4.70E-01 | 2.83E-04 | 4.66E-02 | 4.95E-02 | 6.49E-01 | 5.31E-01 |
| 539.02632 | 68.12  | 21.84 | 21.95 | 22.08 | 21.99 | 8.79E-01 | 9.85E-01 | 8.46E-01 | 9.64E-01 | 9.70E-01 | 9.99E-01 | 9.90E-01 |
| 539.0317  | 271.09 | 14.54 | 14.98 | 14.83 | 14.55 | 5.04E-01 | 5.49E-01 | 8.17E-01 | 1.00E+00 | 9.70E-01 | 6.18E-01 | 8.59E-01 |
| 539.1147  | 143.49 | 11.32 | 12.37 | 12.85 | 12.37 | 2.53E-05 | 5.37E-03 | 1.12E-05 | 7.09E-03 | 4.56E-01 | 1.00E+00 | 4.79E-01 |
| 539.13099 | 233.68 | 12.63 | 19.82 | 20.28 | 18.64 | 7.48E-42 | 3.65E-14 | 3.65E-14 | 3.96E-14 | 8.03E-01 | 1.05E-01 | 8.98E-03 |
| 539.16452 | 26.07  | 15.86 | 14.29 | 15.61 | 15.96 | 1.91E-03 | 4.46E-03 | 9.50E-01 | 9.96E-01 | 2.84E-02 | 4.14E-03 | 8.90E-01 |
| 539.20031 | 77.68  | 14.82 | 14.15 | 11.53 | 12.89 | 1.16E-14 | 3.20E-01 | 9.85E-14 | 1.85E-05 | 2.99E-09 | 1.48E-02 | 6.09E-03 |
| 539.28149 | 270.3  | 14.44 | 13.18 | 15.27 | 14.28 | 5.53E-03 | 1.16E-01 | 4.44E-01 | 9.92E-01 | 2.00E-03 | 2.56E-01 | 3.37E-01 |
| 539.28304 | 87.38  | 10.89 | 14.06 | 14.92 | 14.57 | 9.43E-10 | 9.45E-06 | 7.41E-09 | 4.00E-07 | 5.50E-01 | 8.73E-01 | 9.53E-01 |
| 539.3131  | 27.38  | 14.99 | 20.76 | 18.72 | 19.06 | 1.18E-35 | 3.65E-14 | 7.63E-14 | 6.96E-14 | 1.76E-06 | 1.71E-04 | 8.28E-01 |
| 539.38552 | 25.86  | 15.79 | 16.59 | 14.25 | 17.43 | 4.85E-14 | 1.21E-01 | 1.58E-04 | 8.64E-05 | 8.90E-09 | 1.26E-01 | 1.14E-13 |
| 539.70288 | 49.32  | 13.28 | 14.74 | 14.73 | 14.18 | 1.46E-06 | 1.03E-05 | 1.01E-05 | 1.82E-02 | 1.00E+00 | 2.87E-01 | 2.99E-01 |
| 539.78733 | 50.38  | 14.04 | 14.14 | 14.54 | 13.23 | 2.90E-01 | 9.99E-01 | 8.61E-01 | 6.16E-01 | 9.29E-01 | 5.47E-01 | 2.18E-01 |

|           |        |       |       |       |       |          |          |          |          |          |          |          |
|-----------|--------|-------|-------|-------|-------|----------|----------|----------|----------|----------|----------|----------|
| 539.81352 | 26.16  | 15.35 | 19.88 | 18.35 | 18.65 | 4.59E-37 | 3.65E-14 | 7.16E-14 | 5.72E-14 | 3.73E-06 | 4.77E-04 | 7.72E-01 |
| 539.8883  | 27.78  | 12.27 | 17.69 | 11.01 | 17.29 | 5.33E-39 | 5.03E-14 | 4.23E-02 | 7.47E-14 | 3.65E-14 | 8.55E-01 | 3.72E-14 |
| 539.90867 | 50.42  | 17.95 | 19.90 | 20.11 | 19.03 | 6.62E-14 | 1.63E-10 | 1.11E-12 | 1.12E-03 | 8.79E-01 | 1.80E-02 | 1.49E-03 |
| 539.94789 | 58.27  | 16.67 | 13.65 | 15.79 | 13.58 | 1.94E-09 | 2.78E-07 | 3.42E-01 | 2.94E-07 | 7.02E-04 | 9.99E-01 | 6.13E-04 |
| 539.94864 | 256.82 | 13.02 | 13.26 | 14.15 | 13.20 | 1.10E-01 | 9.62E-01 | 9.41E-02 | 9.83E-01 | 2.87E-01 | 1.00E+00 | 2.58E-01 |
| 540.02524 | 54.56  | 18.21 | 18.25 | 18.31 | 18.19 | 9.83E-01 | 9.99E-01 | 9.87E-01 | 1.00E+00 | 9.97E-01 | 9.98E-01 | 9.82E-01 |
| 540.12253 | 234.08 | 13.58 | 16.93 | 17.44 | 16.31 | 1.94E-22 | 7.43E-14 | 6.78E-14 | 4.05E-11 | 5.22E-01 | 3.79E-01 | 1.84E-02 |
| 540.1336  | 225.01 | 7.53  | 13.42 | 13.46 | 12.64 | 1.45E-30 | 4.03E-14 | 3.85E-14 | 7.39E-14 | 1.00E+00 | 4.48E-01 | 3.87E-01 |
| 540.14844 | 97.86  | 14.64 | 12.11 | 13.71 | 12.70 | 8.89E-10 | 1.25E-09 | 6.48E-02 | 8.29E-06 | 3.33E-04 | 4.48E-01 | 6.21E-02 |
| 540.31855 | 25.61  | 14.48 | 19.13 | 16.69 | 17.72 | 7.78E-46 | 3.65E-14 | 7.47E-14 | 3.67E-14 | 7.54E-14 | 1.32E-06 | 6.87E-04 |
| 540.39084 | 24.84  | 14.30 | 16.37 | 12.11 | 16.97 | 6.52E-33 | 5.36E-08 | 5.63E-09 | 8.25E-12 | 3.90E-14 | 3.57E-01 | 3.65E-14 |
| 540.5172  | 45.78  | 16.20 | 12.63 | 12.69 | 13.57 | 2.53E-19 | 7.47E-14 | 7.39E-14 | 2.39E-09 | 9.99E-01 | 1.06E-01 | 1.41E-01 |
| 540.56823 | 48.64  | 17.47 | 17.48 | 17.47 | 16.92 | 8.38E-02 | 1.00E+00 | 1.00E+00 | 1.20E-01 | 1.00E+00 | 1.26E-01 | 1.42E-01 |
| 540.65695 | 47.08  | 18.10 | 19.44 | 19.40 | 18.99 | 3.53E-19 | 7.34E-14 | 7.36E-14 | 5.85E-08 | 9.96E-01 | 2.25E-02 | 3.86E-02 |
| 540.7066  | 40.68  | 12.21 | 11.27 | 14.73 | 11.84 | 3.64E-12 | 1.58E-01 | 3.27E-07 | 8.47E-01 | 9.97E-12 | 6.36E-01 | 2.69E-08 |
| 540.7767  | 49.73  | 17.22 | 17.06 | 17.03 | 15.65 | 1.44E-03 | 9.81E-01 | 9.71E-01 | 1.72E-03 | 1.00E+00 | 8.66E-03 | 9.43E-03 |
| 540.82603 | 25.94  | 14.01 | 17.49 | 15.30 | 16.18 | 8.66E-20 | 6.89E-14 | 6.14E-04 | 6.07E-09 | 4.04E-09 | 1.28E-03 | 6.03E-02 |
| 540.91137 | 50.77  | 13.79 | 13.46 | 13.46 | 13.04 | 3.26E-01 | 8.27E-01 | 8.31E-01 | 2.36E-01 | 1.00E+00 | 7.37E-01 | 7.22E-01 |
| 541.00263 | 45.81  | 12.46 | 14.74 | 13.74 | 14.99 | 1.21E-07 | 4.69E-06 | 2.19E-02 | 6.36E-07 | 1.35E-01 | 9.53E-01 | 4.30E-02 |
| 541.01822 | 54.66  | 19.65 | 19.55 | 19.78 | 19.54 | 8.40E-01 | 9.85E-01 | 9.68E-01 | 9.82E-01 | 8.61E-01 | 1.00E+00 | 8.56E-01 |
| 541.12109 | 49.54  | 13.94 | 11.39 | 11.83 | 12.29 | 2.00E-06 | 2.37E-06 | 1.15E-04 | 6.50E-03 | 8.14E-01 | 2.99E-01 | 8.01E-01 |
| 541.12609 | 226.82 | 8.40  | 12.75 | 12.45 | 12.52 | 1.24E-18 | 7.77E-14 | 1.88E-13 | 3.69E-13 | 9.34E-01 | 9.71E-01 | 9.99E-01 |
| 541.32879 | 27.29  | 14.01 | 20.23 | 18.20 | 18.72 | 4.05E-59 | 3.65E-14 | 3.65E-14 | 3.65E-14 | 7.09E-11 | 3.42E-06 | 2.81E-01 |
| 541.64607 | 47.38  | 16.22 | 9.71  | 10.10 | 10.66 | 4.18E-30 | 3.83E-14 | 4.59E-14 | 7.25E-14 | 8.93E-01 | 3.39E-01 | 7.51E-01 |
| 541.83072 | 27.64  | 12.65 | 19.32 | 17.29 | 17.69 | 1.18E-60 | 3.65E-14 | 3.65E-14 | 3.65E-14 | 5.26E-10 | 1.60E-06 | 5.67E-01 |
| 541.87003 | 53.18  | 18.36 | 16.04 | 16.42 | 15.16 | 3.64E-09 | 1.23E-05 | 3.34E-04 | 2.42E-09 | 8.58E-01 | 3.04E-01 | 5.80E-02 |
| 541.90489 | 51.5   | 15.32 | 16.32 | 16.66 | 15.57 | 3.31E-06 | 1.92E-03 | 9.46E-06 | 8.04E-01 | 6.17E-01 | 5.34E-02 | 1.18E-03 |
| 542.02314 | 55.84  | 15.69 | 15.49 | 15.52 | 15.90 | 7.85E-01 | 9.67E-01 | 9.77E-01 | 9.59E-01 | 1.00E+00 | 7.92E-01 | 8.18E-01 |
| 542.06805 | 289.17 | 16.18 | 20.35 | 20.04 | 18.44 | 1.56E-46 | 3.65E-14 | 3.65E-14 | 7.47E-14 | 5.91E-01 | 1.21E-11 | 9.89E-09 |
| 542.32208 | 36.7   | 19.89 | 20.07 | 20.17 | 19.59 | 4.10E-03 | 6.73E-01 | 2.90E-01 | 2.40E-01 | 9.28E-01 | 2.22E-02 | 3.05E-03 |
| 542.33597 | 27.23  | 15.33 | 18.99 | 16.04 | 17.81 | 6.78E-34 | 3.65E-14 | 3.43E-02 | 7.47E-14 | 5.85E-14 | 1.77E-04 | 4.83E-09 |
| 542.45998 | 53.25  | 12.41 | 13.99 | 15.08 | 11.62 | 5.39E-10 | 1.09E-02 | 1.53E-06 | 4.34E-01 | 1.58E-01 | 9.44E-05 | 3.32E-09 |
| 542.50017 | 279.2  | 15.21 | 14.58 | 14.53 | 14.15 | 3.07E-03 | 1.10E-01 | 6.55E-02 | 1.46E-03 | 9.97E-01 | 4.61E-01 | 5.71E-01 |
| 542.51411 | 45.62  | 17.48 | 15.53 | 16.16 | 15.34 | 6.82E-09 | 3.93E-07 | 9.91E-04 | 5.50E-08 | 2.93E-01 | 9.57E-01 | 1.17E-01 |
| 542.56737 | 48.03  | 14.97 | 14.94 | 14.32 | 14.31 | 2.90E-01 | 1.00E+00 | 4.69E-01 | 4.88E-01 | 5.32E-01 | 5.48E-01 | 1.00E+00 |
| 542.65389 | 47.14  | 17.75 | 18.96 | 18.97 | 18.58 | 5.23E-17 | 1.10E-13 | 9.07E-14 | 4.22E-07 | 1.00E+00 | 6.00E-02 | 4.98E-02 |
| 542.69893 | 46.18  | 13.46 | 14.93 | 16.38 | 14.22 | 1.86E-20 | 1.58E-06 | 6.65E-14 | 4.03E-02 | 3.26E-06 | 7.49E-02 | 1.03E-11 |
| 542.73807 | 45.97  | 17.73 | 20.33 | 20.00 | 20.37 | 1.37E-33 | 3.67E-14 | 5.32E-14 | 3.70E-14 | 4.05E-01 | 9.98E-01 | 3.24E-01 |
| 542.77469 | 49.6   | 15.52 | 13.72 | 14.88 | 13.49 | 9.07E-03 | 3.65E-02 | 7.68E-01 | 1.71E-02 | 3.22E-01 | 9.88E-01 | 1.93E-01 |
| 542.79099 | 45.77  | 11.84 | 17.12 | 15.32 | 15.72 | 2.48E-31 | 3.65E-14 | 7.44E-14 | 7.36E-14 | 3.72E-05 | 3.27E-03 | 7.52E-01 |
| 542.83817 | 27.65  | 8.90  | 17.57 | 14.96 | 15.67 | 8.42E-50 | 3.65E-14 | 3.65E-14 | 3.65E-14 | 3.03E-07 | 5.46E-04 | 4.42E-01 |
| 542.86356 | 51.42  | 16.44 | 16.76 | 17.53 | 15.62 | 2.26E-04 | 8.56E-01 | 3.53E-02 | 2.02E-01 | 2.52E-01 | 4.12E-02 | 6.71E-05 |
| 542.89239 | 23.82  | 12.90 | 10.15 | 15.78 | 12.23 | 1.10E-31 | 4.19E-11 | 3.11E-12 | 3.16E-01 | 3.65E-14 | 2.98E-06 | 7.57E-14 |
| 542.94405 | 273.76 | 15.09 | 14.14 | 15.54 | 14.62 | 4.34E-06 | 1.91E-03 | 3.18E-01 | 3.06E-01 | 2.53E-06 | 2.99E-01 | 5.79E-03 |
| 543.01583 | 72.29  | 17.03 | 18.36 | 17.71 | 17.72 | 4.64E-05 | 8.88E-06 | 5.49E-02 | 6.32E-02 | 8.78E-02 | 1.13E-01 | 1.00E+00 |
| 543.07161 | 295.49 | 14.33 | 14.68 | 14.91 | 13.24 | 5.68E-04 | 8.20E-01 | 4.52E-01 | 3.71E-02 | 9.38E-01 | 3.85E-03 | 4.33E-04 |
| 543.13212 | 132.75 | 13.39 | 17.65 | 14.39 | 15.99 | 5.72E-20 | 7.41E-14 | 7.61E-02 | 3.08E-08 | 4.09E-12 | 1.26E-03 | 1.77E-03 |
| 543.17474 | 70.4   | 13.93 | 13.04 | 11.23 | 13.40 | 2.36E-09 | 1.33E-01 | 1.23E-09 | 5.97E-01 | 1.36E-04 | 8.33E-01 | 4.98E-06 |
| 543.32554 | 33.52  | 17.89 | 17.98 | 18.07 | 17.42 | 2.82E-02 | 9.72E-01 | 8.22E-01 | 1.56E-01 | 9.76E-01 | 7.13E-02 | 2.31E-02 |
| 543.34418 | 27.16  | 15.02 | 19.63 | 18.00 | 18.23 | 2.91E-58 | 3.65E-14 | 3.65E-14 | 3.65E-14 | 1.30E-12 | 3.57E-09 | 6.88E-01 |
| 543.64262 | 47.58  | 16.36 | 10.06 | 10.35 | 11.64 | 3.02E-43 | 3.65E-14 | 3.65E-14 | 4.32E-14 | 8.82E-01 | 1.11E-03 | 1.16E-02 |
| 543.73793 | 46.38  | 14.78 | 17.34 | 16.79 | 17.64 | 8.92E-31 | 4.30E-14 | 7.43E-14 | 3.67E-14 | 6.79E-02 | 5.89E-01 | 1.67E-03 |
| 543.85543 | 39.39  | 15.98 | 19.12 | 16.93 | 17.89 | 2.05E-28 | 3.65E-14 | 4.93E-04 | 2.21E-12 | 7.63E-14 | 1.27E-05 | 1.12E-03 |
| 543.94427 | 278.46 | 12.44 | 14.36 | 14.13 | 13.38 | 5.07E-05 | 8.61E-05 | 6.33E-04 | 1.50E-01 | 9.55E-01 | 1.47E-01 | 3.57E-01 |
| 543.98384 | 95.85  | 14.54 | 16.06 | 15.17 | 15.28 | 3.85E-13 | 9.89E-14 | 2.91E-03 | 4.35E-04 | 1.37E-05 | 3.70E-04 | 9.25E-01 |
| 544.01167 | 89     | 14.86 | 16.96 | 16.83 | 15.20 | 5.59E-10 | 1.45E-07 | 7.28E-07 | 8.04E-01 | 9.84E-01 | 4.35E-05 | 1.64E-04 |
| 544.05551 | 279.05 | 13.02 | 15.31 | 14.41 | 13.81 | 3.29E-06 | 1.06E-06 | 6.24E-03 | 2.73E-01 | 1.63E-01 | 5.36E-03 | 5.37E-01 |
| 544.10273 | 70.31  | 17.92 | 14.19 | 15.72 | 15.09 | 1.12E-20 | 6.85E-14 | 9.29E-09 | 1.35E-12 | 1.97E-04 | 7.78E-02 | 3.27E-01 |
| 544.16752 | 278.69 | 15.08 | 16.37 | 15.85 | 15.23 | 1.32E-05 | 2.25E-05 | 2.35E-02 | 9.49E-01 | 2.49E-01 | 5.97E-04 | 1.34E-01 |
| 544.33936 | 28.79  | 23.57 | 23.41 | 23.20 | 22.97 | 7.83E-03 | 7.87E-01 | 1.45E-01 | 5.31E-03 | 6.56E-01 | 8.78E-02 | 5.93E-01 |
| 544.50206 | 276.87 | 13.69 | 15.17 | 15.11 | 14.16 | 6.66E-06 | 6.69E-05 | 1.14E-04 | 4.99E-01 | 9.98E-01 | 2.23E-02 | 3.27E-02 |
| 544.5106  | 45.61  | 18.00 | 16.37 | 16.49 | 16.17 | 1.34E-08 | 2.17E-06 | 1.08E-05 | 1.93E-07 | 9.81E-01 | 9.31E-01 | 7.63E-01 |
| 544.60631 | 49.98  | 16.57 | 17.36 | 17.28 | 16.43 | 4.55E-04 | 1.36E-02 | 3.27E-02 | 9.47E-01 | 9.89E-01 | 4.25E-03 | 1.07E-02 |
| 544.61392 | 277.51 | 15.17 | 15.05 | 14.85 | 14.81 | 4.13E-01 | 9.53E-01 | 5.31E-01 | 4.53E-01 | 8.56E-01 | 7.85E-01 | 9.98E-01 |
| 544.65215 | 47.34  | 15.77 | 17.51 | 17.51 | 16.98 | 3.03E-14 | 5.58E-12 | 4.04E-12 | 3.51E-06 | 1.00E+00 | 1.33E-01 | 1.33E-01 |
| 544.6968  | 46.19  | 13.58 | 13.13 | 14.32 | 12.55 | 3.10E-06 | 4.92E-01 | 8.05E-02 | 9.34E-03 | 1.54E-03 | 3.07E-01 | 1.24E-06 |
| 544.73556 | 46     | 17.33 | 19.81 | 19.70 | 19.81 | 9.69E-36 | 3.65E-14 | 3.70E-14 | 3.67E-14 | 9.37E-01 | 1.00E+00 | 9.42E-01 |
| 544.78743 | 46.31  | 9.15  | 15.01 | 13.25 | 11.94 | 6.85E-15 | 7.77E-14 | 1.53E-08 | 3.73E-04 | 5.21E-02 | 1.21E-04 | 2.40E-01 |

|           |        |       |       |       |       |          |          |          |          |          |          |          |
|-----------|--------|-------|-------|-------|-------|----------|----------|----------|----------|----------|----------|----------|
| 544.8343  | 44.99  | 9.16  | 12.78 | 10.21 | 10.37 | 2.71E-06 | 7.11E-07 | 3.78E-01 | 2.80E-01 | 1.10E-03 | 3.94E-03 | 9.95E-01 |
| 544.86123 | 49.35  | 15.27 | 15.56 | 15.74 | 15.00 | 5.22E-01 | 9.42E-01 | 7.82E-01 | 9.51E-01 | 9.84E-01 | 7.20E-01 | 4.94E-01 |
| 545.02867 | 53.35  | 20.81 | 23.00 | 22.70 | 22.03 | 6.74E-28 | 3.74E-14 | 6.65E-14 | 1.22E-09 | 3.75E-01 | 4.32E-06 | 2.43E-03 |
| 545.34285 | 28.93  | 21.85 | 21.61 | 21.50 | 21.25 | 2.64E-03 | 4.05E-01 | 1.07E-01 | 1.01E-03 | 9.05E-01 | 1.20E-01 | 3.91E-01 |
| 545.46359 | 53.39  | 14.84 | 17.24 | 16.89 | 15.53 | 1.38E-08 | 1.39E-07 | 7.18E-06 | 3.74E-01 | 8.40E-01 | 7.01E-04 | 1.05E-02 |
| 545.50389 | 278.26 | 14.65 | 14.40 | 14.56 | 13.57 | 3.00E-02 | 9.04E-01 | 9.94E-01 | 2.71E-02 | 9.76E-01 | 1.61E-01 | 6.12E-02 |
| 545.53089 | 53.6   | 12.58 | 14.77 | 13.39 | 13.09 | 1.54E-06 | 5.18E-07 | 1.72E-01 | 6.03E-01 | 4.11E-03 | 4.46E-04 | 8.87E-01 |
| 545.61871 | 279.89 | 15.26 | 14.94 | 14.81 | 14.92 | 3.99E-01 | 6.49E-01 | 3.58E-01 | 6.27E-01 | 9.70E-01 | 1.00E+00 | 9.82E-01 |
| 545.72475 | 278.91 | 14.77 | 14.04 | 14.12 | 13.75 | 5.00E-02 | 1.99E-01 | 2.82E-01 | 3.67E-02 | 9.97E-01 | 8.76E-01 | 7.73E-01 |
| 545.73473 | 48.15  | 15.08 | 17.37 | 17.19 | 17.33 | 1.05E-24 | 7.12E-14 | 7.49E-14 | 7.54E-14 | 8.40E-01 | 9.97E-01 | 9.30E-01 |
| 545.83571 | 278.62 | 14.55 | 14.41 | 14.88 | 14.09 | 3.31E-02 | 9.41E-01 | 5.56E-01 | 2.93E-01 | 2.64E-01 | 6.45E-01 | 1.76E-02 |
| 545.86137 | 38.03  | 13.56 | 15.64 | 12.79 | 16.67 | 6.54E-25 | 2.46E-08 | 1.01E-01 | 7.54E-14 | 1.92E-13 | 2.27E-02 | 6.21E-14 |
| 545.87101 | 28.4   | 14.00 | 14.42 | 11.64 | 15.96 | 8.82E-20 | 7.08E-01 | 2.34E-08 | 9.97E-06 | 2.06E-10 | 1.24E-03 | 7.09E-14 |
| 545.94684 | 279.04 | 15.36 | 15.59 | 14.87 | 14.33 | 7.69E-03 | 9.23E-01 | 5.32E-01 | 3.44E-02 | 2.23E-01 | 7.56E-03 | 5.05E-01 |
| 546.03209 | 54.55  | 16.83 | 19.31 | 19.21 | 18.17 | 2.09E-15 | 3.41E-13 | 1.33E-12 | 1.99E-04 | 9.89E-01 | 2.90E-03 | 7.35E-03 |
| 546.08595 | 73.16  | 16.68 | 18.88 | 19.44 | 17.84 | 1.63E-16 | 9.36E-11 | 7.49E-14 | 1.85E-03 | 3.00E-01 | 9.08E-03 | 1.02E-05 |
| 546.16499 | 277.82 | 13.89 | 14.78 | 14.58 | 14.59 | 4.70E-02 | 4.39E-02 | 1.67E-01 | 1.78E-01 | 9.40E-01 | 9.54E-01 | 1.00E+00 |
| 546.20289 | 125.62 | 15.31 | 16.77 | 16.77 | 16.61 | 6.93E-12 | 1.42E-09 | 1.13E-09 | 1.59E-07 | 1.00E+00 | 9.05E-01 | 9.10E-01 |
| 546.2817  | 276.86 | 15.64 | 15.77 | 15.63 | 16.08 | 5.33E-01 | 9.79E-01 | 1.00E+00 | 5.49E-01 | 9.77E-01 | 8.01E-01 | 5.54E-01 |
| 546.2828  | 34.43  | 18.70 | 16.58 | 16.39 | 17.24 | 7.52E-18 | 1.50E-13 | 7.43E-14 | 5.36E-07 | 8.90E-01 | 6.98E-02 | 9.16E-03 |
| 546.34485 | 28.41  | 17.60 | 16.99 | 15.90 | 17.21 | 5.02E-07 | 1.71E-01 | 1.79E-07 | 5.88E-01 | 2.64E-03 | 8.90E-01 | 2.37E-04 |
| 546.35448 | 36.05  | 20.92 | 21.29 | 21.28 | 20.63 | 3.23E-03 | 2.16E-01 | 2.38E-01 | 4.74E-01 | 1.00E+00 | 7.81E-03 | 8.90E-03 |
| 546.44866 | 278.9  | 15.52 | 15.96 | 15.64 | 15.22 | 2.87E-01 | 6.08E-01 | 9.87E-01 | 8.53E-01 | 8.18E-01 | 2.14E-01 | 6.88E-01 |
| 546.46199 | 53.23  | 13.78 | 14.47 | 13.30 | 13.84 | 1.60E-02 | 1.91E-01 | 5.21E-01 | 9.98E-01 | 6.66E-03 | 3.16E-01 | 4.63E-01 |
| 546.50877 | 45.63  | 17.32 | 15.40 | 15.59 | 15.31 | 2.51E-09 | 2.45E-07 | 3.07E-06 | 1.27E-07 | 9.47E-01 | 9.93E-01 | 8.53E-01 |
| 546.60682 | 46.83  | 18.08 | 18.89 | 18.83 | 17.62 | 2.82E-05 | 2.33E-02 | 3.95E-02 | 3.88E-01 | 9.97E-01 | 1.85E-04 | 3.66E-04 |
| 546.61788 | 278.5  | 13.65 | 17.49 | 17.33 | 16.05 | 1.80E-23 | 7.05E-14 | 7.23E-14 | 5.44E-09 | 9.76E-01 | 1.56E-03 | 5.65E-03 |
| 546.64693 | 46.11  | 15.68 | 15.84 | 16.04 | 15.70 | 6.10E-01 | 9.46E-01 | 6.00E-01 | 1.00E+00 | 9.11E-01 | 9.71E-01 | 6.94E-01 |
| 546.73426 | 46.17  | 14.88 | 18.15 | 18.17 | 17.99 | 4.06E-32 | 3.87E-14 | 3.74E-14 | 5.36E-14 | 1.00E+00 | 9.44E-01 | 9.21E-01 |
| 546.78479 | 46.24  | 9.93  | 12.68 | 13.84 | 13.20 | 5.12E-17 | 7.58E-09 | 7.54E-14 | 2.23E-11 | 4.57E-02 | 6.66E-01 | 4.95E-01 |
| 546.78622 | 277.01 | 14.55 | 14.31 | 14.37 | 14.41 | 8.62E-01 | 8.44E-01 | 9.16E-01 | 9.66E-01 | 9.98E-01 | 9.88E-01 | 9.99E-01 |
| 546.82981 | 39.07  | 15.20 | 16.85 | 17.41 | 17.22 | 2.05E-09 | 3.85E-05 | 1.15E-08 | 5.66E-07 | 4.10E-01 | 7.57E-01 | 9.55E-01 |
| 546.95115 | 277.43 | 14.97 | 14.37 | 14.35 | 14.10 | 7.02E-03 | 8.25E-02 | 6.45E-02 | 5.30E-03 | 1.00E+00 | 7.56E-01 | 7.93E-01 |
| 546.96439 | 53.14  | 11.06 | 12.38 | 15.58 | 13.07 | 4.55E-15 | 4.94E-02 | 7.49E-14 | 8.56E-04 | 1.97E-08 | 5.70E-01 | 2.55E-05 |
| 547.02543 | 53.05  | 17.90 | 20.22 | 20.04 | 19.18 | 3.44E-22 | 7.27E-14 | 7.47E-14 | 6.21E-07 | 8.53E-01 | 1.05E-04 | 1.92E-03 |
| 547.13116 | 249.85 | 8.86  | 16.28 | 14.15 | 12.55 | 1.38E-39 | 3.65E-14 | 3.94E-14 | 4.49E-13 | 3.71E-05 | 1.09E-12 | 4.28E-03 |
| 547.17092 | 278.12 | 15.45 | 14.76 | 14.50 | 14.42 | 4.91E-04 | 4.95E-02 | 1.98E-03 | 1.09E-03 | 7.61E-01 | 6.09E-01 | 9.92E-01 |
| 547.24107 | 32.89  | 11.05 | 17.53 | 17.35 | 17.08 | 4.81E-50 | 3.65E-14 | 3.65E-14 | 3.65E-14 | 9.68E-01 | 6.74E-01 | 9.02E-01 |
| 547.2833  | 276.83 | 13.00 | 14.22 | 14.68 | 14.36 | 1.43E-03 | 3.68E-02 | 1.21E-03 | 1.89E-02 | 7.48E-01 | 9.91E-01 | 9.04E-01 |
| 547.28575 | 34.01  | 15.23 | 11.02 | 10.82 | 12.96 | 2.81E-25 | 7.16E-14 | 5.81E-14 | 7.03E-07 | 9.63E-01 | 4.96E-05 | 4.99E-06 |
| 547.357   | 34.33  | 19.25 | 19.22 | 19.42 | 18.59 | 8.71E-04 | 9.99E-01 | 8.34E-01 | 7.82E-03 | 7.74E-01 | 1.63E-02 | 6.07E-04 |
| 547.3944  | 277.94 | 15.61 | 16.66 | 16.14 | 15.45 | 4.71E-03 | 1.68E-02 | 4.26E-01 | 9.66E-01 | 4.78E-01 | 6.86E-03 | 2.34E-01 |
| 547.5055  | 277.8  | 14.97 | 16.19 | 15.80 | 15.21 | 2.71E-04 | 3.31E-04 | 2.88E-02 | 8.69E-01 | 5.60E-01 | 1.06E-02 | 2.38E-01 |
| 547.61677 | 277.53 | 14.49 | 15.77 | 15.30 | 14.78 | 2.02E-04 | 1.65E-04 | 3.31E-02 | 7.84E-01 | 4.26E-01 | 1.06E-02 | 3.42E-01 |
| 547.72736 | 278.16 | 14.60 | 14.50 | 14.83 | 14.17 | 1.06E-01 | 9.76E-01 | 8.10E-01 | 3.38E-01 | 5.86E-01 | 6.05E-01 | 6.60E-02 |
| 547.73294 | 49.27  | 14.17 | 15.90 | 16.04 | 15.95 | 9.25E-13 | 3.89E-09 | 1.44E-10 | 3.70E-09 | 9.59E-01 | 9.98E-01 | 9.89E-01 |
| 547.82245 | 49.38  | 16.12 | 15.49 | 15.77 | 15.64 | 2.60E-01 | 2.15E-01 | 6.94E-01 | 4.76E-01 | 8.38E-01 | 9.72E-01 | 9.82E-01 |
| 547.94055 | 61.27  | 19.60 | 20.11 | 20.23 | 18.49 | 1.14E-07 | 3.08E-01 | 1.32E-01 | 1.54E-03 | 9.76E-01 | 2.39E-06 | 2.61E-07 |
| 548.03161 | 47.81  | 10.77 | 15.42 | 14.81 | 15.09 | 8.66E-17 | 1.08E-13 | 1.94E-11 | 4.77E-12 | 7.09E-01 | 9.44E-01 | 9.64E-01 |
| 548.27644 | 278.37 | 15.65 | 16.35 | 15.82 | 15.75 | 2.31E-01 | 2.04E-01 | 9.67E-01 | 9.92E-01 | 4.57E-01 | 3.88E-01 | 9.98E-01 |
| 548.37103 | 26.96  | 18.99 | 18.53 | 18.37 | 18.28 | 7.70E-05 | 2.27E-02 | 6.97E-04 | 1.50E-04 | 7.64E-01 | 4.69E-01 | 9.56E-01 |
| 548.44264 | 278.4  | 14.09 | 14.01 | 13.72 | 13.64 | 4.78E-01 | 9.93E-01 | 6.64E-01 | 5.32E-01 | 8.32E-01 | 7.15E-01 | 9.95E-01 |
| 548.4587  | 279.79 | 15.61 | 17.41 | 16.90 | 15.80 | 4.47E-04 | 1.11E-03 | 3.26E-02 | 9.78E-01 | 7.25E-01 | 8.84E-03 | 1.27E-01 |
| 548.48507 | 265.18 | 14.65 | 14.12 | 15.79 | 14.75 | 1.07E-06 | 2.52E-01 | 5.75E-04 | 9.87E-01 | 3.06E-07 | 1.66E-01 | 4.20E-03 |
| 548.503   | 278.59 | 11.76 | 13.86 | 14.56 | 14.34 | 2.00E-11 | 3.12E-06 | 2.18E-10 | 1.77E-08 | 3.30E-01 | 6.82E-01 | 9.52E-01 |
| 548.50568 | 46.28  | 15.83 | 12.51 | 12.91 | 13.13 | 1.00E-13 | 3.14E-12 | 5.33E-10 | 2.94E-08 | 8.01E-01 | 5.33E-01 | 9.65E-01 |
| 548.60234 | 46.62  | 17.80 | 18.83 | 18.72 | 17.88 | 3.86E-06 | 1.18E-04 | 6.49E-04 | 9.87E-01 | 9.69E-01 | 1.09E-03 | 4.65E-03 |
| 548.62565 | 280.48 | 15.01 | 17.97 | 17.34 | 16.23 | 1.32E-06 | 1.49E-06 | 1.96E-04 | 1.44E-01 | 6.89E-01 | 1.81E-02 | 2.29E-01 |
| 548.6412  | 45.04  | 15.84 | 16.16 | 16.70 | 15.60 | 2.22E-02 | 8.10E-01 | 7.31E-02 | 9.10E-01 | 4.47E-01 | 4.48E-01 | 1.84E-02 |
| 548.68534 | 258.2  | 13.07 | 14.66 | 15.86 | 14.36 | 2.15E-07 | 3.86E-03 | 3.02E-08 | 3.57E-02 | 5.83E-02 | 9.27E-01 | 1.21E-02 |
| 548.68823 | 47.1   | 17.86 | 18.75 | 18.78 | 18.54 | 1.24E-16 | 2.33E-13 | 1.03E-13 | 3.09E-08 | 9.97E-01 | 2.73E-01 | 1.86E-01 |
| 548.72537 | 278.61 | 13.56 | 13.98 | 13.90 | 13.41 | 5.59E-01 | 7.70E-01 | 8.63E-01 | 9.88E-01 | 9.98E-01 | 6.10E-01 | 7.16E-01 |
| 548.73752 | 48.36  | 12.83 | 12.58 | 13.40 | 14.30 | 3.76E-04 | 9.23E-01 | 4.78E-01 | 2.36E-03 | 1.91E-01 | 3.90E-04 | 1.42E-01 |
| 548.78504 | 47.15  | 14.24 | 13.21 | 13.71 | 13.22 | 2.33E-02 | 3.52E-02 | 4.90E-01 | 4.53E-02 | 5.73E-01 | 1.00E+00 | 6.08E-01 |
| 548.79266 | 280.17 | 15.42 | 17.91 | 17.67 | 16.28 | 8.90E-07 | 5.57E-06 | 4.34E-05 | 3.23E-01 | 9.62E-01 | 1.12E-02 | 4.09E-02 |
| 548.82172 | 44     | 16.40 | 17.28 | 17.75 | 17.77 | 2.78E-13 | 2.00E-05 | 2.28E-11 | 4.91E-11 | 7.01E-02 | 6.30E-02 | 9.99E-01 |
| 548.83655 | 278.86 | 12.27 | 13.55 | 13.50 | 11.14 | 2.53E-03 | 2.46E-01 | 2.66E-01 | 3.78E-01 | 1.00E+00 | 5.81E-03 | 6.42E-03 |
| 548.86235 | 40.94  | 12.59 | 14.06 | 13.08 | 13.67 | 1.11E-03 | 8.97E-04 | 5.66E-01 | 3.08E-02 | 6.24E-02 | 7.78E-01 | 4.49E-01 |

|           |        |       |       |       |       |          |          |          |          |          |          |          |
|-----------|--------|-------|-------|-------|-------|----------|----------|----------|----------|----------|----------|----------|
| 548.88554 | 265.06 | 14.19 | 13.91 | 15.77 | 14.26 | 4.02E-09 | 7.78E-01 | 8.11E-07 | 9.95E-01 | 1.68E-08 | 6.75E-01 | 1.05E-05 |
| 548.94391 | 54.35  | 15.44 | 15.15 | 14.17 | 12.15 | 3.73E-08 | 9.50E-01 | 8.11E-02 | 5.41E-08 | 2.80E-01 | 1.79E-06 | 2.35E-03 |
| 548.96015 | 279.75 | 15.76 | 16.86 | 16.69 | 15.87 | 6.20E-02 | 1.13E-01 | 2.21E-01 | 9.96E-01 | 9.87E-01 | 2.24E-01 | 3.80E-01 |
| 549.08053 | 94.42  | 10.80 | 16.69 | 15.42 | 14.77 | 4.67E-48 | 3.65E-14 | 3.65E-14 | 3.74E-14 | 5.96E-04 | 1.69E-07 | 2.10E-01 |
| 549.08551 | 259.68 | 15.14 | 15.79 | 17.44 | 15.91 | 1.20E-16 | 4.12E-02 | 7.27E-14 | 1.33E-02 | 2.03E-09 | 9.70E-01 | 5.74E-08 |
| 549.12729 | 281.13 | 14.31 | 16.07 | 15.55 | 14.41 | 1.11E-02 | 2.11E-02 | 1.71E-01 | 9.99E-01 | 8.33E-01 | 4.95E-02 | 2.81E-01 |
| 549.17529 | 275.41 | 15.76 | 17.78 | 17.87 | 16.80 | 6.06E-14 | 3.77E-11 | 4.00E-12 | 2.05E-03 | 9.91E-01 | 5.16E-03 | 1.73E-03 |
| 549.25823 | 33     | 14.20 | 16.45 | 15.73 | 16.57 | 1.44E-21 | 7.47E-14 | 1.90E-09 | 7.48E-14 | 1.60E-02 | 9.62E-01 | 4.23E-03 |
| 549.28806 | 273.22 | 16.34 | 19.11 | 18.92 | 17.92 | 2.69E-21 | 7.63E-14 | 7.56E-14 | 5.08E-07 | 9.08E-01 | 3.94E-04 | 3.84E-03 |
| 549.37423 | 27.57  | 16.61 | 13.72 | 14.17 | 14.23 | 2.40E-14 | 6.22E-13 | 6.86E-10 | 5.98E-09 | 6.14E-01 | 5.48E-01 | 9.99E-01 |
| 549.39925 | 276.3  | 16.44 | 19.89 | 19.66 | 18.70 | 7.58E-32 | 3.65E-14 | 3.76E-14 | 1.39E-13 | 8.33E-01 | 2.07E-04 | 3.96E-03 |
| 549.48763 | 27.28  | 15.61 | 11.57 | 11.62 | 11.93 | 2.04E-11 | 3.42E-09 | 3.88E-09 | 1.73E-07 | 1.00E+00 | 9.47E-01 | 9.65E-01 |
| 549.48809 | 145.96 | 13.96 | 10.71 | 9.57  | 11.24 | 2.47E-11 | 7.39E-07 | 1.25E-11 | 8.01E-05 | 2.45E-01 | 8.31E-01 | 3.94E-02 |
| 549.51044 | 276.04 | 16.79 | 19.82 | 19.59 | 18.53 | 1.58E-26 | 4.56E-14 | 6.54E-14 | 3.93E-09 | 8.26E-01 | 3.64E-05 | 9.39E-04 |
| 549.62212 | 275.21 | 15.50 | 19.23 | 19.08 | 17.86 | 1.08E-33 | 3.65E-14 | 3.65E-14 | 1.81E-13 | 9.49E-01 | 3.41E-05 | 2.67E-04 |
| 549.68496 | 49.78  | 13.65 | 16.03 | 16.08 | 14.95 | 4.02E-18 | 8.14E-14 | 7.41E-14 | 4.64E-05 | 9.98E-01 | 1.53E-03 | 7.17E-04 |
| 549.73276 | 274.65 | 15.88 | 18.38 | 18.14 | 17.27 | 5.70E-19 | 7.54E-14 | 8.47E-14 | 4.48E-06 | 8.03E-01 | 5.75E-04 | 1.11E-02 |
| 549.81864 | 50     | 15.10 | 15.31 | 15.50 | 15.58 | 5.82E-01 | 9.37E-01 | 6.90E-01 | 5.79E-01 | 9.61E-01 | 9.02E-01 | 9.97E-01 |
| 549.8443  | 273.91 | 15.37 | 17.33 | 16.71 | 16.20 | 5.81E-11 | 2.27E-11 | 4.35E-06 | 1.44E-02 | 1.14E-01 | 4.88E-04 | 2.53E-01 |
| 549.87317 | 25.16  | 14.65 | 18.03 | 14.00 | 17.94 | 4.74E-42 | 3.87E-14 | 9.95E-02 | 4.76E-14 | 3.65E-14 | 9.92E-01 | 3.65E-14 |
| 549.93643 | 53.68  | 16.81 | 17.22 | 16.69 | 15.47 | 1.33E-04 | 6.78E-01 | 9.87E-01 | 2.75E-03 | 4.90E-01 | 6.87E-05 | 1.02E-02 |
| 549.95561 | 272.8  | 15.81 | 15.40 | 15.40 | 15.06 | 8.55E-02 | 4.66E-01 | 4.54E-01 | 4.94E-02 | 1.00E+00 | 6.66E-01 | 6.63E-01 |
| 549.97124 | 303.22 | 14.31 | 17.53 | 16.74 | 14.13 | 1.63E-33 | 3.87E-14 | 7.38E-14 | 9.21E-01 | 2.09E-02 | 3.90E-14 | 7.52E-14 |
| 550.06624 | 275.9  | 15.24 | 14.30 | 14.99 | 14.21 | 1.23E-04 | 1.87E-03 | 7.63E-01 | 8.59E-04 | 4.67E-02 | 9.91E-01 | 2.46E-02 |
| 550.17061 | 279.2  | 15.32 | 18.18 | 18.21 | 17.27 | 4.69E-27 | 5.36E-14 | 4.81E-14 | 1.26E-11 | 1.00E+00 | 4.98E-03 | 3.27E-03 |
| 550.28163 | 278.96 | 15.90 | 19.13 | 19.19 | 18.07 | 2.87E-29 | 4.19E-14 | 3.85E-14 | 2.98E-12 | 9.96E-01 | 1.90E-03 | 7.41E-04 |
| 550.38418 | 26.34  | 17.99 | 18.11 | 17.27 | 17.93 | 1.44E-03 | 9.58E-01 | 7.00E-03 | 9.94E-01 | 1.88E-03 | 8.85E-01 | 2.67E-02 |
| 550.39121 | 279.51 | 14.02 | 19.00 | 18.89 | 18.09 | 2.25E-36 | 3.65E-14 | 3.65E-14 | 5.98E-14 | 9.91E-01 | 8.62E-02 | 1.56E-01 |
| 550.50347 | 279.63 | 16.35 | 19.33 | 19.33 | 18.39 | 2.92E-28 | 4.43E-14 | 4.23E-14 | 2.01E-12 | 1.00E+00 | 3.97E-03 | 3.74E-03 |
| 550.55143 | 49.01  | 15.25 | 14.71 | 14.60 | 14.30 | 7.27E-02 | 4.35E-01 | 2.60E-01 | 4.96E-02 | 9.90E-01 | 6.97E-01 | 8.53E-01 |
| 550.60027 | 48.77  | 16.57 | 17.39 | 17.18 | 16.85 | 6.68E-03 | 5.35E-03 | 6.46E-02 | 6.74E-01 | 8.27E-01 | 1.68E-01 | 5.98E-01 |
| 550.61657 | 277.35 | 16.02 | 18.64 | 18.60 | 17.62 | 3.35E-22 | 7.66E-14 | 7.26E-14 | 6.57E-08 | 9.99E-01 | 1.72E-03 | 2.39E-03 |
| 550.63791 | 45.86  | 15.88 | 15.24 | 15.85 | 15.42 | 2.02E-01 | 2.60E-01 | 1.00E+00 | 5.81E-01 | 3.24E-01 | 9.59E-01 | 6.53E-01 |
| 550.68457 | 46.71  | 18.51 | 19.53 | 19.57 | 19.18 | 6.42E-16 | 6.96E-13 | 1.30E-13 | 5.34E-06 | 9.90E-01 | 4.92E-02 | 2.05E-02 |
| 550.72756 | 279.3  | 16.07 | 17.94 | 17.26 | 17.10 | 5.58E-10 | 9.46E-11 | 4.79E-05 | 1.03E-03 | 5.91E-02 | 1.47E-02 | 9.36E-01 |
| 550.72962 | 45.88  | 11.39 | 13.38 | 15.12 | 13.48 | 5.41E-16 | 6.57E-06 | 7.37E-14 | 3.78E-06 | 1.74E-04 | 9.95E-01 | 6.84E-04 |
| 550.77988 | 48.26  | 14.64 | 13.51 | 13.24 | 13.12 | 6.14E-05 | 8.06E-03 | 4.22E-04 | 2.13E-04 | 8.68E-01 | 7.22E-01 | 9.90E-01 |
| 550.81361 | 52.34  | 14.08 | 17.49 | 17.64 | 16.88 | 6.80E-28 | 5.72E-14 | 4.21E-14 | 7.38E-14 | 9.58E-01 | 2.50E-01 | 8.74E-02 |
| 550.83855 | 279.13 | 15.85 | 17.72 | 18.06 | 16.69 | 8.19E-18 | 3.77E-12 | 7.43E-14 | 5.42E-03 | 5.12E-01 | 5.23E-04 | 1.18E-06 |
| 550.88083 | 24.82  | 14.70 | 18.98 | 15.89 | 18.56 | 5.16E-28 | 4.56E-14 | 7.60E-03 | 7.32E-14 | 2.75E-13 | 7.19E-01 | 4.10E-10 |
| 550.95008 | 278.44 | 15.65 | 17.45 | 16.84 | 16.25 | 2.44E-07 | 1.22E-07 | 8.16E-04 | 2.35E-01 | 2.15E-01 | 1.74E-03 | 2.74E-01 |
| 551.06147 | 278.76 | 14.42 | 15.59 | 15.28 | 14.73 | 1.32E-04 | 1.58E-04 | 9.63E-03 | 6.93E-01 | 6.72E-01 | 1.64E-02 | 2.26E-01 |
| 551.06457 | 84.26  | 10.45 | 12.45 | 11.50 | 11.03 | 2.49E-02 | 1.36E-02 | 3.73E-01 | 8.26E-01 | 4.90E-01 | 1.74E-01 | 9.04E-01 |
| 551.12247 | 276.59 | 15.43 | 14.57 | 14.58 | 14.63 | 8.42E-04 | 3.43E-03 | 3.50E-03 | 1.03E-02 | 1.00E+00 | 9.95E-01 | 9.97E-01 |
| 551.28266 | 278.94 | 16.34 | 18.53 | 18.69 | 17.50 | 8.46E-18 | 1.59E-13 | 7.43E-14 | 1.72E-04 | 9.30E-01 | 1.75E-03 | 1.59E-04 |
| 551.29639 | 71.19  | 10.52 | 13.17 | 14.04 | 11.65 | 3.62E-11 | 1.57E-06 | 8.00E-11 | 1.22E-01 | 3.17E-01 | 2.32E-02 | 4.77E-05 |
| 551.31279 | 27.31  | 14.93 | 19.43 | 17.40 | 18.45 | 6.18E-44 | 3.65E-14 | 7.54E-14 | 3.65E-14 | 2.15E-12 | 2.21E-03 | 6.74E-04 |
| 551.38485 | 25.44  | 15.39 | 18.25 | 14.74 | 18.12 | 3.06E-26 | 9.13E-14 | 2.02E-01 | 8.01E-13 | 7.38E-14 | 9.82E-01 | 7.47E-14 |
| 551.44962 | 279.01 | 15.22 | 18.46 | 18.44 | 17.30 | 3.44E-27 | 5.03E-14 | 4.90E-14 | 9.05E-11 | 1.00E+00 | 1.05E-03 | 1.16E-03 |
| 551.62207 | 275.97 | 14.85 | 13.97 | 14.40 | 14.58 | 7.14E-03 | 3.17E-03 | 2.74E-01 | 7.17E-01 | 1.43E-01 | 1.06E-01 | 9.07E-01 |
| 551.68191 | 49.17  | 14.40 | 17.52 | 17.75 | 16.53 | 3.07E-31 | 3.92E-14 | 3.65E-14 | 6.29E-13 | 8.21E-01 | 2.54E-03 | 8.39E-05 |
| 551.78476 | 277.38 | 12.15 | 15.52 | 14.56 | 13.76 | 1.12E-06 | 4.79E-07 | 4.82E-04 | 5.01E-02 | 4.12E-01 | 3.38E-02 | 5.95E-01 |
| 551.81531 | 31.63  | 14.57 | 18.49 | 16.69 | 17.72 | 5.67E-42 | 3.65E-14 | 7.43E-14 | 3.65E-14 | 6.18E-12 | 1.06E-02 | 2.03E-04 |
| 551.88892 | 28.5   | 13.43 | 18.11 | 12.94 | 17.79 | 1.10E-38 | 3.92E-14 | 5.70E-01 | 6.16E-14 | 3.65E-14 | 8.73E-01 | 4.03E-14 |
| 551.95101 | 277.16 | 14.76 | 13.72 | 14.35 | 13.72 | 8.28E-03 | 1.81E-02 | 6.32E-01 | 2.20E-02 | 3.10E-01 | 1.00E+00 | 3.27E-01 |
| 552.0599  | 278.52 | 15.27 | 15.43 | 14.89 | 15.25 | 4.50E-01 | 9.64E-01 | 6.53E-01 | 1.00E+00 | 3.88E-01 | 9.55E-01 | 7.34E-01 |
| 552.09931 | 73.37  | 17.09 | 17.68 | 17.17 | 16.57 | 4.18E-03 | 1.57E-01 | 9.91E-01 | 2.76E-01 | 2.94E-01 | 1.40E-03 | 1.77E-01 |
| 552.17232 | 278.49 | 16.45 | 21.44 | 21.36 | 19.87 | 2.71E-45 | 3.65E-14 | 3.65E-14 | 6.01E-14 | 9.94E-01 | 1.30E-05 | 3.28E-05 |
| 552.28367 | 279.31 | 16.49 | 22.88 | 22.71 | 21.26 | 1.68E-45 | 3.65E-14 | 3.65E-14 | 3.92E-14 | 9.77E-01 | 6.64E-04 | 2.53E-03 |
| 552.31981 | 27.41  | 13.30 | 17.83 | 13.08 | 16.65 | 2.10E-28 | 6.52E-14 | 9.51E-01 | 1.96E-12 | 5.78E-14 | 4.34E-02 | 3.21E-13 |
| 552.39498 | 281.9  | 14.40 | 22.00 | 22.91 | 20.98 | 8.47E-45 | 3.65E-14 | 3.65E-14 | 3.67E-14 | 3.02E-01 | 2.34E-01 | 2.11E-03 |
| 552.39775 | 26.29  | 17.31 | 17.69 | 17.00 | 17.78 | 1.61E-06 | 5.33E-02 | 1.67E-01 | 1.16E-02 | 6.34E-05 | 9.37E-01 | 7.48E-06 |
| 552.50642 | 279.27 | 16.32 | 23.08 | 22.99 | 21.67 | 1.74E-49 | 3.65E-14 | 3.65E-14 | 3.65E-14 | 9.95E-01 | 3.89E-03 | 7.85E-03 |
| 552.54784 | 48.6   | 17.54 | 17.61 | 17.66 | 16.94 | 5.21E-02 | 9.93E-01 | 9.71E-01 | 1.40E-01 | 9.98E-01 | 9.24E-02 | 5.92E-02 |
| 552.59639 | 47.57  | 14.60 | 14.88 | 14.40 | 14.60 | 5.07E-01 | 7.89E-01 | 9.15E-01 | 1.00E+00 | 4.17E-01 | 8.17E-01 | 9.27E-01 |
| 552.61772 | 279.96 | 17.46 | 22.64 | 22.51 | 21.24 | 1.64E-44 | 3.65E-14 | 3.65E-14 | 4.59E-14 | 9.81E-01 | 2.99E-04 | 1.09E-03 |
| 552.68183 | 46.7   | 17.83 | 18.87 | 18.95 | 18.51 | 7.28E-17 | 3.24E-13 | 7.80E-14 | 3.68E-06 | 9.47E-01 | 4.18E-02 | 8.17E-03 |
| 552.72712 | 45.82  | 12.12 | 14.86 | 15.81 | 14.81 | 2.19E-19 | 1.58E-11 | 7.41E-14 | 1.15E-10 | 6.36E-02 | 9.99E-01 | 5.20E-02 |

|           |        |       |       |       |       |          |          |          |          |          |          |          |
|-----------|--------|-------|-------|-------|-------|----------|----------|----------|----------|----------|----------|----------|
| 552.72876 | 283.56 | 16.32 | 20.41 | 20.43 | 19.79 | 2.89E-30 | 4.01E-14 | 3.87E-14 | 7.46E-14 | 1.00E+00 | 3.22E-01 | 2.90E-01 |
| 552.77384 | 48.23  | 16.06 | 18.19 | 18.12 | 18.00 | 7.00E-22 | 7.47E-14 | 7.36E-14 | 8.93E-14 | 9.88E-01 | 8.46E-01 | 9.57E-01 |
| 552.81368 | 46.75  | 14.38 | 17.25 | 16.29 | 15.95 | 4.43E-19 | 7.09E-14 | 2.87E-10 | 6.50E-07 | 4.70E-03 | 8.98E-05 | 6.52E-01 |
| 552.82234 | 29.79  | 9.54  | 14.99 | 10.09 | 12.55 | 8.44E-12 | 6.16E-11 | 8.88E-01 | 8.36E-04 | 8.73E-09 | 1.41E-02 | 1.18E-02 |
| 552.84069 | 278.13 | 16.51 | 20.89 | 20.76 | 19.48 | 2.41E-40 | 3.65E-14 | 3.65E-14 | 7.36E-14 | 9.66E-01 | 3.83E-05 | 2.23E-04 |
| 552.8928  | 48.86  | 18.45 | 17.98 | 17.87 | 17.24 | 2.28E-04 | 2.68E-01 | 1.15E-01 | 5.32E-05 | 9.79E-01 | 3.82E-02 | 9.48E-02 |
| 552.95203 | 277.26 | 16.07 | 19.75 | 19.50 | 18.28 | 4.12E-34 | 3.65E-14 | 3.67E-14 | 4.99E-13 | 7.97E-01 | 3.67E-06 | 1.58E-04 |
| 552.97338 | 58.57  | 16.33 | 11.09 | 13.69 | 13.18 | 1.22E-19 | 6.74E-14 | 9.17E-07 | 1.24E-08 | 3.29E-06 | 4.93E-04 | 7.52E-01 |
| 553.01663 | 57.49  | 14.90 | 16.34 | 16.25 | 15.72 | 4.38E-10 | 5.08E-09 | 3.44E-08 | 2.54E-03 | 9.78E-01 | 4.77E-02 | 1.16E-01 |
| 553.06295 | 278.77 | 15.95 | 18.50 | 18.49 | 17.59 | 1.45E-20 | 7.32E-14 | 7.58E-14 | 6.98E-08 | 1.00E+00 | 8.37E-03 | 8.64E-03 |
| 553.16966 | 77.71  | 18.97 | 20.45 | 17.18 | 18.78 | 1.14E-09 | 6.12E-03 | 4.78E-04 | 9.76E-01 | 9.93E-11 | 2.93E-03 | 4.73E-03 |
| 553.17441 | 278.37 | 12.99 | 16.70 | 15.35 | 12.45 | 2.50E-13 | 9.96E-10 | 1.44E-04 | 7.79E-01 | 8.45E-02 | 4.13E-11 | 7.15E-06 |
| 553.28664 | 278.34 | 15.62 | 15.08 | 14.63 | 15.05 | 5.98E-02 | 4.40E-01 | 3.16E-02 | 4.17E-01 | 6.23E-01 | 1.00E+00 | 6.89E-01 |
| 553.32875 | 27.18  | 12.30 | 18.67 | 15.57 | 17.12 | 3.87E-44 | 3.65E-14 | 7.43E-14 | 3.65E-14 | 9.53E-14 | 3.30E-04 | 2.96E-04 |
| 553.45112 | 280.53 | 12.86 | 14.40 | 14.38 | 12.90 | 5.58E-04 | 9.20E-03 | 9.50E-03 | 1.00E+00 | 1.00E+00 | 1.93E-02 | 2.00E-02 |
| 553.45112 | 52.93  | 14.20 | 15.43 | 15.73 | 13.70 | 2.90E-08 | 3.26E-03 | 1.08E-04 | 4.95E-01 | 8.41E-01 | 3.21E-05 | 6.00E-07 |
| 553.61619 | 278.85 | 15.33 | 16.03 | 15.47 | 15.12 | 5.33E-02 | 1.36E-01 | 9.71E-01 | 9.20E-01 | 3.32E-01 | 4.11E-02 | 7.27E-01 |
| 553.67923 | 49.18  | 14.13 | 17.27 | 17.41 | 16.34 | 1.92E-33 | 3.67E-14 | 3.65E-14 | 7.89E-14 | 9.37E-01 | 2.78E-03 | 2.92E-04 |
| 553.77077 | 49.23  | 13.96 | 16.45 | 16.56 | 16.09 | 1.39E-28 | 5.32E-14 | 4.12E-14 | 7.53E-14 | 9.65E-01 | 4.15E-01 | 1.85E-01 |
| 553.78386 | 278.61 | 13.45 | 15.13 | 14.88 | 14.91 | 3.71E-03 | 5.89E-03 | 2.46E-02 | 2.70E-02 | 9.64E-01 | 9.78E-01 | 1.00E+00 |
| 553.88574 | 50.8   | 18.73 | 19.63 | 20.05 | 19.02 | 1.06E-07 | 8.47E-04 | 1.66E-07 | 6.16E-01 | 2.75E-01 | 6.80E-02 | 1.87E-04 |
| 553.95021 | 279.1  | 14.36 | 14.42 | 14.45 | 14.19 | 9.70E-01 | 9.99E-01 | 9.98E-01 | 9.90E-01 | 1.00E+00 | 9.76E-01 | 9.68E-01 |
| 554.06053 | 280.81 | 14.82 | 14.69 | 14.73 | 14.03 | 1.11E-01 | 9.80E-01 | 9.95E-01 | 1.04E-01 | 9.99E-01 | 2.54E-01 | 1.90E-01 |
| 554.07813 | 158.54 | 11.97 | 10.53 | 13.14 | 11.21 | 9.99E-12 | 1.61E-04 | 3.04E-03 | 1.23E-01 | 5.93E-12 | 2.31E-01 | 7.16E-07 |
| 554.10894 | 73.35  | 12.33 | 11.92 | 14.24 | 11.35 | 5.78E-10 | 7.39E-01 | 2.76E-05 | 9.44E-02 | 5.23E-07 | 5.66E-01 | 9.85E-10 |
| 554.17218 | 76.84  | 14.68 | 17.12 | 12.10 | 14.47 | 4.04E-10 | 1.95E-03 | 7.95E-04 | 9.91E-01 | 3.09E-11 | 1.42E-03 | 4.94E-03 |
| 554.17243 | 280.57 | 11.39 | 15.21 | 14.63 | 12.93 | 1.53E-11 | 1.15E-10 | 3.47E-08 | 2.96E-02 | 7.21E-01 | 5.27E-04 | 1.60E-02 |
| 554.25449 | 39.85  | 17.06 | 18.15 | 15.51 | 17.71 | 1.35E-04 | 2.47E-01 | 4.17E-02 | 7.00E-01 | 1.04E-04 | 8.94E-01 | 2.49E-03 |
| 554.28237 | 279.89 | 13.80 | 15.15 | 15.33 | 14.39 | 8.74E-03 | 3.54E-02 | 1.15E-02 | 6.55E-01 | 9.85E-01 | 4.72E-01 | 2.77E-01 |
| 554.28687 | 33.47  | 13.72 | 14.00 | 14.69 | 12.59 | 4.21E-02 | 9.79E-01 | 4.94E-01 | 3.86E-01 | 7.62E-01 | 2.24E-01 | 2.21E-02 |
| 554.39556 | 282.13 | 15.82 | 14.74 | 14.80 | 14.73 | 3.61E-05 | 3.30E-04 | 6.99E-04 | 4.57E-04 | 9.96E-01 | 1.00E+00 | 9.95E-01 |
| 554.54464 | 47.22  | 17.98 | 18.06 | 17.98 | 17.47 | 1.49E-02 | 9.75E-01 | 1.00E+00 | 4.25E-02 | 9.76E-01 | 1.74E-02 | 4.97E-02 |
| 554.6341  | 46.9   | 16.67 | 18.17 | 18.22 | 17.29 | 4.26E-15 | 7.70E-12 | 1.21E-12 | 1.41E-02 | 9.96E-01 | 2.58E-04 | 8.84E-05 |
| 554.68059 | 47.05  | 16.00 | 16.99 | 16.98 | 16.80 | 3.03E-16 | 2.64E-13 | 2.75E-13 | 6.04E-09 | 1.00E+00 | 4.46E-01 | 4.88E-01 |
| 554.76655 | 48.5   | 17.00 | 18.14 | 18.26 | 18.63 | 5.33E-22 | 3.69E-12 | 9.33E-14 | 6.83E-14 | 8.75E-01 | 1.21E-02 | 8.43E-02 |
| 554.88928 | 48.15  | 16.35 | 16.22 | 16.90 | 14.77 | 1.11E-06 | 9.83E-01 | 4.29E-01 | 1.82E-04 | 2.65E-01 | 1.16E-03 | 4.00E-07 |
| 554.93319 | 42.13  | 14.13 | 14.24 | 14.24 | 15.89 | 2.26E-10 | 9.71E-01 | 9.70E-01 | 2.62E-09 | 1.00E+00 | 7.41E-08 | 5.86E-08 |
| 554.98481 | 56.12  | 16.32 | 11.89 | 10.88 | 15.37 | 5.11E-19 | 3.10E-11 | 7.43E-14 | 4.23E-01 | 3.61E-01 | 9.61E-07 | 1.32E-10 |
| 555.06257 | 169.68 | 12.80 | 15.65 | 15.23 | 14.00 | 2.80E-24 | 5.72E-14 | 7.55E-14 | 5.45E-05 | 3.87E-01 | 3.54E-08 | 5.04E-05 |
| 555.16706 | 76.34  | 11.20 | 13.56 | 8.41  | 11.45 | 4.82E-10 | 4.51E-03 | 4.13E-04 | 9.86E-01 | 4.71E-11 | 2.33E-02 | 2.66E-04 |
| 555.39442 | 23.33  | 12.83 | 9.38  | 14.78 | 11.12 | 6.83E-46 | 3.87E-14 | 3.36E-10 | 1.30E-07 | 3.65E-14 | 2.12E-07 | 3.76E-14 |
| 555.58902 | 98.37  | 9.53  | 12.30 | 13.29 | 12.12 | 3.51E-12 | 3.36E-07 | 2.57E-12 | 3.80E-06 | 2.03E-01 | 9.86E-01 | 1.10E-01 |
| 555.67646 | 49.09  | 13.97 | 15.72 | 15.64 | 14.56 | 9.37E-13 | 1.79E-10 | 9.51E-10 | 1.08E-01 | 9.86E-01 | 9.46E-05 | 3.22E-04 |
| 555.76475 | 49.7   | 14.91 | 17.20 | 17.32 | 16.68 | 2.29E-29 | 4.67E-14 | 3.76E-14 | 8.25E-14 | 9.31E-01 | 6.69E-02 | 1.23E-02 |
| 555.88277 | 50.99  | 17.93 | 18.69 | 19.26 | 17.79 | 8.24E-08 | 1.95E-02 | 3.47E-06 | 9.47E-01 | 1.50E-01 | 6.19E-03 | 1.06E-06 |
| 556.01989 | 53.71  | 16.03 | 18.63 | 18.04 | 17.30 | 1.47E-19 | 7.47E-14 | 1.03E-12 | 1.59E-05 | 1.10E-01 | 1.20E-05 | 3.60E-02 |
| 556.1378  | 254.73 | 13.54 | 16.55 | 18.18 | 17.72 | 3.71E-23 | 2.46E-10 | 6.41E-14 | 7.49E-14 | 1.64E-03 | 5.43E-02 | 7.41E-01 |
| 556.17097 | 292.4  | 13.94 | 14.19 | 12.78 | 13.92 | 3.92E-03 | 9.24E-01 | 2.11E-02 | 1.00E+00 | 4.17E-03 | 9.19E-01 | 3.83E-02 |
| 556.2802  | 126.91 | 8.35  | 14.40 | 14.02 | 14.58 | 2.20E-51 | 3.65E-14 | 3.65E-14 | 3.65E-14 | 7.09E-01 | 9.63E-01 | 4.22E-01 |
| 556.28131 | 270.52 | 13.55 | 14.55 | 15.22 | 14.99 | 9.34E-04 | 1.04E-01 | 8.67E-04 | 8.25E-03 | 4.41E-01 | 7.77E-01 | 9.59E-01 |
| 556.48083 | 128.77 | 9.90  | 16.14 | 15.13 | 15.46 | 1.72E-55 | 3.65E-14 | 3.65E-14 | 3.65E-14 | 1.17E-02 | 1.78E-01 | 7.67E-01 |
| 556.4809  | 269.9  | 11.31 | 15.19 | 16.02 | 15.12 | 2.09E-18 | 3.56E-12 | 7.38E-14 | 2.79E-11 | 3.84E-01 | 9.99E-01 | 3.28E-01 |
| 556.49048 | 45.06  | 17.67 | 12.13 | 11.96 | 13.50 | 4.11E-19 | 7.53E-14 | 7.41E-14 | 3.34E-09 | 9.92E-01 | 1.68E-01 | 8.87E-02 |
| 556.52162 | 53.44  | 13.06 | 15.90 | 14.56 | 14.54 | 5.76E-11 | 4.45E-12 | 3.82E-04 | 8.70E-04 | 3.06E-03 | 3.58E-03 | 1.00E+00 |
| 556.54251 | 46.68  | 17.32 | 17.39 | 17.22 | 16.78 | 4.50E-02 | 9.88E-01 | 9.71E-01 | 7.78E-02 | 8.79E-01 | 4.32E-02 | 2.14E-01 |
| 556.63155 | 46.92  | 17.57 | 19.20 | 19.21 | 18.35 | 2.58E-12 | 4.01E-10 | 2.19E-10 | 8.91E-03 | 1.00E+00 | 4.50E-03 | 3.60E-03 |
| 556.67339 | 44.94  | 14.10 | 16.39 | 16.74 | 15.36 | 3.76E-09 | 1.10E-06 | 1.13E-08 | 2.20E-02 | 8.53E-01 | 1.04E-01 | 1.20E-02 |
| 556.67875 | 270.8  | 13.99 | 14.22 | 15.23 | 14.36 | 1.54E-02 | 9.42E-01 | 1.06E-02 | 7.99E-01 | 6.68E-02 | 9.86E-01 | 1.68E-01 |
| 556.68019 | 126.74 | 8.19  | 14.33 | 14.23 | 14.31 | 7.37E-49 | 3.65E-14 | 3.65E-14 | 3.65E-14 | 9.94E-01 | 1.00E+00 | 9.97E-01 |
| 556.75147 | 49.35  | 16.94 | 12.59 | 12.40 | 12.67 | 1.77E-19 | 8.94E-14 | 7.54E-14 | 2.24E-13 | 9.85E-01 | 9.99E-01 | 9.61E-01 |
| 556.76987 | 49.42  | 9.55  | 15.82 | 15.65 | 15.48 | 1.79E-30 | 4.12E-14 | 4.43E-14 | 6.27E-14 | 9.90E-01 | 9.29E-01 | 9.89E-01 |
| 556.80734 | 44.05  | 12.05 | 10.95 | 14.20 | 12.09 | 4.25E-09 | 9.87E-02 | 4.35E-05 | 1.00E+00 | 1.04E-09 | 1.10E-01 | 1.85E-04 |
| 556.85931 | 33.28  | 14.21 | 15.56 | 14.11 | 15.39 | 3.00E-04 | 6.04E-03 | 9.94E-01 | 2.67E-02 | 3.33E-03 | 9.80E-01 | 1.56E-02 |
| 556.88176 | 134.71 | 7.82  | 13.63 | 13.38 | 12.80 | 2.40E-38 | 3.65E-14 | 3.65E-14 | 3.94E-14 | 9.35E-01 | 2.25E-01 | 5.30E-01 |
| 556.94856 | 42.97  | 13.72 | 14.66 | 16.29 | 15.80 | 8.97E-19 | 3.24E-03 | 7.58E-14 | 9.51E-12 | 8.90E-08 | 5.61E-04 | 3.08E-01 |
| 557.01892 | 53.77  | 14.35 | 16.85 | 15.76 | 15.76 | 5.41E-13 | 1.22E-13 | 2.13E-05 | 4.24E-05 | 2.59E-03 | 3.99E-03 | 1.00E+00 |
| 557.08185 | 134.8  | 7.05  | 12.11 | 11.85 | 10.88 | 1.34E-21 | 7.37E-14 | 7.29E-14 | 2.67E-11 | 9.58E-01 | 1.10E-01 | 2.80E-01 |
| 557.09484 | 43.54  | 17.55 | 18.18 | 18.76 | 18.26 | 6.69E-08 | 7.64E-03 | 9.01E-09 | 2.29E-03 | 1.86E-02 | 9.74E-01 | 7.20E-02 |

|           |        |       |       |       |       |          |          |          |          |          |          |          |
|-----------|--------|-------|-------|-------|-------|----------|----------|----------|----------|----------|----------|----------|
| 557.12266 | 92     | 11.83 | 18.13 | 16.65 | 16.81 | 2.47E-27 | 3.76E-14 | 7.52E-14 | 7.49E-14 | 2.76E-02 | 7.72E-02 | 9.90E-01 |
| 557.14116 | 252.65 | 13.12 | 16.89 | 18.81 | 17.44 | 3.88E-38 | 7.12E-14 | 3.65E-14 | 4.34E-14 | 2.83E-06 | 4.81E-01 | 2.07E-03 |
| 557.76267 | 49.52  | 10.40 | 15.53 | 15.78 | 14.03 | 6.74E-31 | 3.90E-14 | 3.67E-14 | 1.53E-13 | 9.38E-01 | 5.99E-03 | 7.27E-04 |
| 557.85202 | 50.32  | 16.51 | 15.31 | 15.85 | 15.13 | 1.91E-03 | 9.79E-03 | 3.01E-01 | 2.63E-03 | 5.07E-01 | 9.67E-01 | 2.66E-01 |
| 557.87827 | 47.91  | 15.16 | 15.46 | 15.63 | 14.40 | 1.79E-02 | 8.59E-01 | 6.10E-01 | 2.25E-01 | 9.76E-01 | 4.84E-02 | 1.45E-02 |
| 557.96035 | 145.2  | 8.95  | 13.46 | 15.13 | 12.86 | 6.89E-40 | 3.90E-14 | 3.65E-14 | 7.29E-14 | 1.30E-04 | 4.37E-01 | 1.82E-07 |
| 558.09514 | 42.65  | 13.85 | 14.60 | 14.57 | 14.99 | 2.54E-01 | 5.47E-01 | 5.66E-01 | 2.03E-01 | 1.00E+00 | 9.13E-01 | 8.96E-01 |
| 558.12286 | 83.12  | 16.29 | 19.72 | 18.80 | 18.20 | 5.48E-20 | 7.16E-14 | 3.00E-12 | 3.02E-07 | 3.32E-02 | 1.11E-04 | 3.08E-01 |
| 558.29571 | 34.97  | 18.39 | 21.07 | 20.71 | 20.39 | 6.34E-40 | 3.65E-14 | 3.65E-14 | 5.03E-14 | 1.85E-01 | 1.43E-03 | 2.83E-01 |
| 558.48758 | 44.97  | 19.54 | 15.88 | 15.74 | 15.71 | 9.07E-17 | 3.56E-12 | 4.20E-13 | 1.51E-12 | 9.92E-01 | 9.88E-01 | 1.00E+00 |
| 558.54096 | 47.01  | 13.40 | 15.16 | 14.31 | 13.65 | 1.16E-03 | 9.28E-04 | 1.86E-01 | 9.47E-01 | 2.76E-01 | 1.20E-02 | 5.24E-01 |
| 558.62877 | 47.87  | 17.23 | 18.93 | 18.88 | 18.34 | 2.63E-14 | 2.62E-12 | 6.13E-12 | 1.02E-05 | 9.97E-01 | 6.03E-02 | 9.35E-02 |
| 558.67158 | 45.06  | 15.50 | 17.15 | 17.58 | 16.56 | 4.39E-11 | 2.57E-07 | 4.75E-11 | 2.67E-03 | 4.71E-01 | 2.21E-01 | 5.19E-03 |
| 558.71657 | 46.87  | 17.04 | 18.74 | 18.75 | 18.30 | 2.43E-15 | 1.05E-12 | 5.24E-13 | 2.98E-07 | 1.00E+00 | 2.09E-01 | 1.85E-01 |
| 558.74851 | 49     | 15.62 | 9.98  | 10.55 | 11.48 | 2.65E-35 | 3.65E-14 | 3.67E-14 | 7.41E-14 | 5.07E-01 | 2.68E-03 | 1.21E-01 |
| 558.84545 | 45.96  | 15.82 | 17.10 | 17.76 | 17.16 | 1.44E-09 | 7.40E-05 | 5.15E-10 | 4.81E-05 | 1.17E-01 | 9.97E-01 | 2.03E-01 |
| 558.87904 | 24.78  | 13.31 | 14.92 | 11.01 | 16.64 | 5.04E-33 | 1.48E-04 | 1.26E-08 | 7.90E-14 | 7.38E-14 | 1.10E-04 | 3.65E-14 |
| 558.94386 | 171.66 | 8.04  | 15.00 | 13.94 | 13.27 | 3.12E-34 | 3.65E-14 | 3.92E-14 | 7.35E-14 | 1.63E-01 | 6.66E-03 | 5.80E-01 |
| 558.99284 | 62.24  | 16.90 | 19.42 | 19.32 | 18.80 | 1.52E-22 | 7.27E-14 | 7.42E-14 | 1.36E-11 | 9.78E-01 | 8.57E-02 | 1.92E-01 |
| 559.01339 | 274.87 | 14.71 | 15.95 | 16.76 | 17.08 | 8.42E-05 | 1.01E-01 | 8.59E-04 | 1.44E-04 | 4.49E-01 | 1.90E-01 | 9.40E-01 |
| 559.09191 | 42.7   | 12.10 | 13.28 | 14.26 | 13.66 | 1.36E-02 | 2.97E-01 | 7.61E-03 | 1.10E-01 | 4.92E-01 | 9.51E-01 | 8.35E-01 |
| 559.12885 | 89.2   | 9.05  | 14.92 | 11.69 | 12.75 | 6.08E-16 | 7.27E-14 | 1.97E-04 | 2.00E-07 | 6.74E-06 | 7.17E-03 | 3.79E-01 |
| 559.29863 | 33.62  | 16.64 | 19.07 | 18.70 | 18.38 | 1.09E-26 | 4.01E-14 | 7.29E-14 | 1.43E-13 | 2.95E-01 | 8.82E-03 | 4.40E-01 |
| 559.71559 | 48.38  | 14.82 | 15.62 | 15.69 | 14.54 | 1.25E-06 | 4.45E-03 | 1.50E-03 | 6.39E-01 | 9.93E-01 | 1.20E-04 | 3.34E-05 |
| 559.77008 | 106.85 | 13.02 | 14.06 | 14.70 | 13.90 | 2.61E-04 | 3.39E-02 | 7.32E-05 | 1.13E-01 | 3.51E-01 | 9.78E-01 | 1.84E-01 |
| 559.84837 | 50.84  | 14.18 | 14.51 | 15.92 | 14.51 | 5.19E-05 | 8.23E-01 | 4.32E-05 | 8.35E-01 | 2.22E-03 | 1.00E+00 | 3.00E-03 |
| 559.96613 | 85.6   | 14.86 | 15.69 | 14.58 | 15.58 | 1.89E-03 | 5.23E-02 | 8.30E-01 | 1.36E-01 | 5.50E-03 | 9.88E-01 | 2.00E-02 |
| 559.98867 | 96.27  | 11.87 | 13.42 | 13.66 | 12.40 | 4.90E-04 | 6.68E-03 | 1.04E-03 | 6.90E-01 | 9.62E-01 | 1.81E-01 | 6.01E-02 |
| 560.07871 | 298.99 | 14.44 | 19.05 | 19.17 | 15.67 | 1.00E-15 | 1.33E-11 | 2.70E-12 | 2.19E-01 | 9.98E-01 | 3.31E-06 | 1.11E-06 |
| 560.29513 | 36.94  | 10.83 | 13.74 | 12.92 | 13.15 | 1.36E-05 | 1.34E-05 | 2.85E-03 | 1.17E-03 | 5.45E-01 | 7.91E-01 | 9.84E-01 |
| 560.31135 | 35.42  | 17.80 | 20.01 | 19.56 | 19.27 | 1.18E-27 | 3.72E-14 | 7.48E-14 | 3.54E-13 | 6.35E-02 | 5.66E-04 | 3.99E-01 |
| 560.48439 | 43.2   | 19.81 | 16.50 | 16.30 | 15.67 | 8.05E-12 | 1.74E-07 | 2.11E-08 | 1.69E-10 | 9.87E-01 | 5.23E-01 | 7.21E-01 |
| 560.5795  | 49.12  | 16.00 | 16.88 | 16.62 | 16.29 | 5.82E-04 | 4.07E-04 | 2.17E-02 | 5.46E-01 | 6.54E-01 | 5.69E-02 | 4.82E-01 |
| 560.62807 | 47.38  | 15.72 | 17.60 | 17.47 | 16.90 | 4.87E-17 | 7.87E-14 | 1.84E-13 | 1.42E-06 | 9.42E-01 | 1.31E-02 | 5.74E-02 |
| 560.6692  | 45.12  | 15.19 | 16.01 | 16.44 | 15.10 | 3.76E-05 | 4.33E-02 | 3.82E-04 | 9.92E-01 | 5.30E-01 | 3.07E-02 | 3.18E-04 |
| 560.71401 | 46.96  | 16.96 | 19.19 | 19.29 | 18.76 | 6.73E-28 | 5.65E-14 | 4.19E-14 | 7.78E-14 | 9.64E-01 | 1.76E-01 | 5.89E-02 |
| 560.84039 | 49.84  | 15.10 | 15.99 | 16.19 | 15.74 | 3.54E-03 | 2.37E-02 | 2.72E-03 | 1.85E-01 | 9.23E-01 | 8.77E-01 | 5.20E-01 |
| 560.9879  | 42.84  | 15.18 | 16.33 | 16.18 | 16.24 | 1.17E-08 | 1.81E-07 | 5.77E-06 | 2.76E-06 | 8.83E-01 | 9.80E-01 | 9.88E-01 |
| 561.00387 | 52.8   | 20.18 | 20.96 | 21.29 | 20.40 | 2.61E-13 | 9.90E-07 | 2.57E-12 | 4.54E-01 | 1.32E-01 | 1.68E-03 | 1.14E-07 |
| 561.04707 | 84.58  | 14.35 | 16.19 | 15.34 | 15.30 | 7.17E-04 | 1.91E-04 | 1.01E-01 | 1.48E-01 | 2.24E-01 | 2.13E-01 | 1.00E+00 |
| 561.08183 | 302.47 | 15.71 | 15.72 | 13.97 | 12.83 | 9.35E-18 | 1.00E+00 | 1.33E-06 | 8.92E-14 | 2.78E-06 | 1.39E-13 | 6.10E-03 |
| 561.12291 | 82.91  | 13.57 | 14.25 | 12.85 | 13.59 | 6.37E-04 | 1.44E-01 | 1.07E-01 | 1.00E+00 | 1.59E-04 | 2.03E-01 | 1.28E-01 |
| 561.13533 | 82.84  | 14.35 | 15.52 | 14.55 | 13.71 | 8.19E-07 | 6.95E-04 | 9.13E-01 | 1.55E-01 | 8.87E-03 | 1.91E-07 | 3.99E-02 |
| 561.19916 | 34.25  | 13.78 | 15.41 | 14.91 | 15.42 | 1.33E-06 | 9.36E-06 | 3.80E-03 | 1.34E-05 | 4.47E-01 | 1.00E+00 | 4.41E-01 |
| 561.28682 | 247.41 | 10.40 | 12.23 | 14.70 | 12.56 | 2.82E-08 | 3.32E-02 | 3.01E-09 | 9.90E-03 | 2.08E-03 | 9.66E-01 | 1.32E-02 |
| 561.3147  | 34.34  | 15.42 | 17.64 | 17.29 | 16.61 | 2.40E-12 | 8.47E-12 | 6.62E-09 | 6.80E-04 | 6.40E-01 | 6.19E-03 | 1.33E-01 |
| 561.53628 | 244.43 | 10.54 | 13.07 | 14.48 | 13.06 | 4.81E-15 | 2.42E-07 | 7.47E-14 | 5.67E-07 | 1.14E-02 | 1.00E+00 | 1.35E-02 |
| 561.71057 | 49.24  | 13.40 | 17.01 | 17.11 | 15.91 | 1.97E-34 | 3.65E-14 | 3.65E-14 | 7.43E-14 | 9.86E-01 | 1.26E-03 | 3.04E-04 |
| 561.78699 | 245.39 | 9.15  | 11.88 | 13.80 | 11.63 | 1.05E-10 | 1.25E-04 | 1.03E-11 | 9.13E-04 | 1.60E-02 | 9.82E-01 | 6.09E-03 |
| 561.86843 | 85.14  | 11.78 | 15.61 | 15.16 | 14.22 | 1.55E-15 | 1.01E-13 | 8.75E-12 | 2.12E-06 | 7.60E-01 | 2.21E-02 | 2.09E-01 |
| 562.00661 | 62.48  | 16.07 | 17.33 | 17.30 | 16.23 | 6.04E-09 | 2.05E-06 | 2.90E-06 | 9.17E-01 | 9.99E-01 | 1.28E-04 | 1.76E-04 |
| 562.04385 | 276.72 | 15.21 | 16.10 | 15.82 | 15.65 | 4.15E-02 | 2.55E-02 | 1.99E-01 | 5.20E-01 | 8.28E-01 | 5.31E-01 | 9.52E-01 |
| 562.15448 | 257.39 | 12.07 | 16.85 | 16.60 | 15.11 | 3.49E-20 | 7.47E-14 | 7.31E-14 | 6.59E-08 | 9.60E-01 | 6.04E-03 | 2.44E-02 |
| 562.16909 | 274.92 | 14.38 | 16.66 | 16.09 | 15.35 | 9.29E-10 | 8.07E-10 | 4.42E-06 | 2.76E-02 | 3.51E-01 | 1.88E-03 | 1.69E-01 |
| 562.29388 | 277.4  | 16.05 | 18.31 | 18.16 | 17.25 | 5.90E-18 | 7.47E-14 | 9.97E-14 | 3.49E-05 | 9.42E-01 | 5.93E-04 | 3.89E-03 |
| 562.32702 | 35.81  | 19.58 | 21.62 | 21.50 | 20.96 | 4.40E-24 | 6.61E-14 | 7.38E-14 | 1.37E-10 | 9.24E-01 | 5.89E-03 | 3.40E-02 |
| 562.42004 | 274.92 | 15.30 | 16.98 | 16.48 | 15.94 | 6.91E-07 | 3.85E-07 | 5.76E-04 | 1.67E-01 | 3.63E-01 | 6.54E-03 | 3.17E-01 |
| 562.48249 | 45     | 19.46 | 15.79 | 15.39 | 15.74 | 1.35E-16 | 1.03E-11 | 1.16E-13 | 1.84E-11 | 8.59E-01 | 1.00E+00 | 9.06E-01 |
| 562.54508 | 274.61 | 15.60 | 15.86 | 15.71 | 15.34 | 2.97E-01 | 7.49E-01 | 9.71E-01 | 7.65E-01 | 9.46E-01 | 2.36E-01 | 5.22E-01 |
| 562.57705 | 48.99  | 17.57 | 18.54 | 18.46 | 17.38 | 1.28E-04 | 8.17E-03 | 1.67E-02 | 9.22E-01 | 9.94E-01 | 1.88E-03 | 4.00E-03 |
| 562.62538 | 47.32  | 14.08 | 13.93 | 13.51 | 13.15 | 8.31E-03 | 9.54E-01 | 1.88E-01 | 8.41E-03 | 4.80E-01 | 4.70E-02 | 6.04E-01 |
| 562.6669  | 45.16  | 11.45 | 11.12 | 11.80 | 10.51 | 1.40E-02 | 8.25E-01 | 7.97E-01 | 8.06E-02 | 3.13E-01 | 4.34E-01 | 8.35E-03 |
| 562.66982 | 276.36 | 15.49 | 15.68 | 15.48 | 14.45 | 1.39E-03 | 9.36E-01 | 1.00E+00 | 7.72E-03 | 9.29E-01 | 1.63E-03 | 1.09E-02 |
| 562.71255 | 47.2   | 15.15 | 18.19 | 18.34 | 17.74 | 1.52E-38 | 3.65E-14 | 3.65E-14 | 4.72E-14 | 9.13E-01 | 2.09E-01 | 4.72E-02 |
| 562.79576 | 277.31 | 14.10 | 14.76 | 14.70 | 14.07 | 2.33E-01 | 4.06E-01 | 4.76E-01 | 1.00E+00 | 9.99E-01 | 4.23E-01 | 4.91E-01 |
| 562.8074  | 36.16  | 15.02 | 17.27 | 17.41 | 17.60 | 8.63E-20 | 2.90E-13 | 7.84E-14 | 7.41E-14 | 9.56E-01 | 6.74E-01 | 9.21E-01 |
| 562.88308 | 24.68  | 12.90 | 18.58 | 15.18 | 18.53 | 2.11E-37 | 3.65E-14 | 2.87E-07 | 3.65E-14 | 2.38E-13 | 1.00E+00 | 1.15E-12 |
| 562.99957 | 52.49  | 17.48 | 18.49 | 18.98 | 17.79 | 9.25E-11 | 4.10E-05 | 2.59E-10 | 5.08E-01 | 1.22E-01 | 1.57E-02 | 2.85E-06 |

|           |        |       |       |       |       |          |          |          |          |          |          |          |
|-----------|--------|-------|-------|-------|-------|----------|----------|----------|----------|----------|----------|----------|
| 563.08257 | 276.39 | 13.46 | 12.78 | 14.15 | 13.02 | 2.31E-02 | 4.49E-01 | 4.12E-01 | 7.84E-01 | 1.87E-02 | 9.61E-01 | 8.46E-02 |
| 563.12653 | 146.53 | 7.06  | 12.80 | 11.27 | 9.86  | 1.34E-21 | 6.14E-14 | 3.36E-13 | 3.07E-06 | 2.61E-02 | 1.88E-06 | 5.37E-02 |
| 563.28706 | 275.92 | 15.67 | 15.61 | 15.70 | 16.05 | 6.06E-01 | 9.98E-01 | 1.00E+00 | 6.78E-01 | 9.94E-01 | 5.99E-01 | 7.47E-01 |
| 563.33048 | 36.57  | 17.29 | 19.68 | 19.59 | 18.83 | 6.40E-27 | 4.74E-14 | 5.65E-14 | 6.75E-11 | 9.72E-01 | 8.36E-04 | 3.46E-03 |
| 563.38297 | 24.5   | 13.23 | 17.32 | 11.81 | 17.58 | 5.22E-37 | 7.22E-14 | 4.70E-03 | 7.32E-14 | 3.67E-14 | 9.37E-01 | 3.65E-14 |
| 563.48699 | 274.58 | 14.93 | 14.08 | 14.77 | 14.43 | 2.13E-05 | 1.97E-05 | 8.07E-01 | 3.55E-02 | 1.10E-03 | 2.43E-01 | 2.70E-01 |
| 563.70814 | 49.26  | 12.65 | 16.16 | 16.13 | 14.41 | 7.99E-29 | 4.19E-14 | 4.21E-14 | 2.26E-07 | 9.99E-01 | 5.47E-07 | 7.46E-07 |
| 563.79696 | 50.19  | 14.68 | 16.52 | 16.85 | 15.94 | 2.99E-14 | 3.45E-10 | 1.93E-13 | 4.23E-05 | 6.24E-01 | 1.73E-01 | 7.42E-03 |
| 563.89045 | 24.9   | 11.94 | 17.71 | 12.82 | 17.29 | 1.83E-33 | 3.74E-14 | 2.42E-01 | 5.74E-14 | 7.27E-14 | 8.35E-01 | 7.35E-14 |
| 563.91352 | 53.14  | 18.45 | 18.75 | 19.01 | 16.58 | 1.68E-09 | 8.34E-01 | 4.02E-01 | 4.98E-06 | 9.01E-01 | 2.15E-07 | 4.62E-09 |
| 563.98671 | 55.9   | 15.17 | 10.82 | 7.84  | 9.02  | 4.78E-24 | 1.09E-09 | 4.94E-14 | 7.45E-14 | 7.44E-05 | 4.75E-02 | 3.12E-01 |
| 564.0068  | 53.96  | 14.92 | 17.45 | 17.55 | 16.22 | 1.20E-18 | 8.29E-14 | 7.39E-14 | 1.40E-04 | 9.87E-01 | 5.35E-04 | 1.26E-04 |
| 564.11042 | 188.51 | 13.21 | 15.72 | 14.34 | 14.75 | 3.60E-12 | 5.24E-13 | 1.98E-03 | 1.78E-05 | 1.57E-04 | 2.13E-02 | 5.89E-01 |
| 564.14006 | 82.26  | 10.01 | 13.21 | 14.05 | 12.44 | 1.75E-20 | 2.23E-13 | 7.21E-14 | 3.59E-08 | 1.57E-01 | 2.56E-01 | 7.17E-04 |
| 564.26973 | 35.15  | 13.45 | 15.83 | 14.82 | 15.80 | 3.81E-10 | 7.30E-09 | 1.52E-03 | 2.67E-08 | 4.66E-02 | 1.00E+00 | 6.62E-02 |
| 564.3254  | 35.6   | 13.90 | 16.47 | 16.06 | 15.73 | 3.80E-21 | 7.27E-14 | 7.85E-14 | 9.20E-11 | 3.76E-01 | 2.72E-02 | 5.84E-01 |
| 564.35811 | 28.76  | 17.25 | 10.73 | 11.17 | 11.97 | 8.63E-65 | 3.65E-14 | 3.65E-14 | 3.65E-14 | 4.51E-01 | 4.48E-04 | 4.65E-02 |
| 564.39324 | 24.63  | 13.89 | 16.98 | 12.29 | 16.92 | 8.88E-43 | 7.29E-14 | 1.42E-06 | 7.49E-14 | 3.65E-14 | 9.98E-01 | 3.65E-14 |
| 564.48052 | 45.01  | 18.61 | 14.26 | 13.77 | 14.11 | 4.35E-19 | 3.39E-13 | 7.47E-14 | 2.54E-13 | 8.02E-01 | 9.94E-01 | 9.26E-01 |
| 564.57499 | 47.88  | 17.78 | 18.50 | 18.38 | 17.80 | 6.40E-04 | 4.12E-03 | 2.29E-02 | 9.99E-01 | 9.44E-01 | 1.15E-02 | 5.05E-02 |
| 564.66334 | 46.99  | 16.67 | 18.48 | 18.52 | 17.88 | 7.85E-28 | 5.01E-14 | 4.21E-14 | 1.59E-11 | 9.93E-01 | 2.90E-03 | 1.02E-03 |
| 564.71256 | 47.99  | 13.47 | 14.62 | 14.98 | 15.13 | 1.99E-09 | 1.17E-04 | 1.56E-07 | 2.26E-08 | 5.46E-01 | 2.59E-01 | 9.45E-01 |
| 564.79665 | 49.8   | 13.56 | 18.56 | 18.59 | 18.52 | 1.25E-40 | 3.65E-14 | 3.65E-14 | 3.65E-14 | 1.00E+00 | 1.00E+00 | 9.97E-01 |
| 564.89657 | 30.36  | 11.80 | 16.38 | 11.04 | 16.15 | 4.19E-41 | 3.87E-14 | 1.83E-01 | 5.43E-14 | 3.65E-14 | 9.35E-01 | 3.67E-14 |
| 564.96662 | 280.22 | 13.23 | 13.69 | 14.42 | 13.22 | 1.22E-01 | 8.36E-01 | 1.35E-01 | 1.00E+00 | 5.77E-01 | 8.51E-01 | 1.69E-01 |
| 565.00823 | 49.29  | 13.89 | 15.21 | 15.57 | 14.40 | 5.48E-06 | 8.91E-04 | 9.03E-06 | 4.66E-01 | 7.36E-01 | 1.20E-01 | 7.48E-03 |
| 565.08374 | 94.24  | 13.10 | 14.16 | 12.94 | 13.36 | 2.41E-03 | 8.87E-03 | 9.60E-01 | 8.69E-01 | 2.27E-03 | 1.09E-01 | 6.15E-01 |
| 565.28959 | 278.57 | 15.47 | 15.63 | 14.97 | 15.07 | 1.91E-01 | 9.67E-01 | 4.48E-01 | 6.51E-01 | 2.36E-01 | 4.01E-01 | 9.93E-01 |
| 565.32843 | 29.31  | 14.47 | 16.51 | 14.55 | 15.74 | 7.42E-11 | 2.56E-09 | 9.94E-01 | 6.32E-04 | 2.27E-08 | 8.87E-02 | 2.11E-03 |
| 565.39866 | 24.25  | 12.25 | 14.81 | 10.24 | 15.05 | 1.87E-37 | 1.41E-12 | 1.45E-08 | 1.35E-13 | 3.65E-14 | 9.06E-01 | 3.65E-14 |
| 565.60293 | 69.64  | 13.19 | 19.65 | 19.16 | 17.38 | 9.36E-28 | 4.03E-14 | 5.72E-14 | 8.87E-12 | 8.10E-01 | 5.99E-04 | 1.10E-02 |
| 565.65914 | 48.38  | 14.25 | 13.51 | 13.77 | 12.78 | 1.56E-02 | 3.33E-01 | 6.89E-01 | 7.31E-03 | 9.38E-01 | 4.07E-01 | 1.45E-01 |
| 565.79436 | 49.58  | 14.15 | 16.96 | 17.32 | 16.33 | 9.21E-29 | 6.03E-14 | 3.72E-14 | 1.55E-13 | 5.37E-01 | 9.79E-02 | 1.90E-03 |
| 565.91019 | 51.55  | 15.94 | 13.70 | 15.15 | 12.42 | 8.60E-08 | 1.03E-03 | 5.22E-01 | 1.14E-07 | 8.03E-02 | 1.70E-01 | 9.25E-05 |
| 565.93732 | 67.19  | 12.75 | 18.94 | 18.60 | 16.77 | 2.54E-21 | 7.23E-14 | 7.34E-14 | 9.83E-09 | 9.49E-01 | 6.45E-03 | 2.93E-02 |
| 566.27136 | 70.41  | 11.74 | 17.26 | 16.58 | 14.08 | 3.69E-11 | 3.80E-10 | 2.96E-08 | 2.50E-02 | 8.45E-01 | 1.36E-03 | 1.75E-02 |
| 566.32086 | 41.22  | 17.42 | 16.57 | 17.06 | 16.52 | 2.29E-02 | 4.98E-02 | 6.88E-01 | 4.02E-02 | 4.62E-01 | 9.99E-01 | 3.97E-01 |
| 566.45615 | 53.28  | 14.90 | 16.72 | 14.25 | 15.07 | 1.43E-07 | 6.64E-05 | 3.61E-01 | 9.79E-01 | 5.61E-08 | 8.59E-04 | 2.17E-01 |
| 566.47761 | 45.16  | 16.27 | 8.20  | 7.98  | 8.88  | 2.19E-31 | 4.01E-14 | 3.74E-14 | 6.94E-14 | 9.89E-01 | 7.85E-01 | 5.93E-01 |
| 566.5221  | 45.3   | 17.58 | 15.59 | 14.66 | 14.82 | 9.93E-09 | 4.29E-04 | 5.51E-08 | 8.12E-07 | 2.60E-01 | 4.60E-01 | 9.90E-01 |
| 566.5732  | 49.3   | 16.79 | 17.51 | 17.25 | 16.86 | 2.20E-02 | 2.69E-02 | 2.61E-01 | 9.91E-01 | 7.61E-01 | 8.47E-02 | 4.75E-01 |
| 566.66072 | 46.95  | 17.47 | 19.32 | 19.34 | 18.80 | 6.41E-30 | 3.92E-14 | 3.76E-14 | 1.22E-13 | 9.99E-01 | 8.44E-03 | 5.37E-03 |
| 566.68781 | 275.96 | 15.57 | 20.47 | 20.57 | 19.63 | 1.93E-42 | 3.65E-14 | 3.65E-14 | 3.76E-14 | 9.91E-01 | 7.36E-02 | 3.30E-02 |
| 566.69937 | 44.48  | 15.06 | 17.08 | 17.50 | 16.59 | 4.01E-20 | 1.28E-13 | 7.24E-14 | 2.23E-08 | 3.33E-01 | 2.25E-01 | 2.40E-03 |
| 566.79112 | 52.49  | 16.54 | 18.63 | 18.83 | 18.17 | 8.82E-31 | 4.39E-14 | 3.67E-14 | 7.61E-14 | 6.85E-01 | 8.00E-02 | 3.11E-03 |
| 566.88859 | 276.54 | 15.17 | 21.10 | 21.32 | 20.06 | 3.39E-40 | 3.65E-14 | 3.65E-14 | 4.50E-14 | 9.53E-01 | 8.27E-02 | 2.01E-02 |
| 567.01179 | 53.78  | 20.21 | 22.51 | 22.15 | 21.11 | 6.44E-19 | 7.43E-14 | 3.59E-13 | 2.21E-03 | 4.79E-01 | 8.37E-07 | 3.55E-04 |
| 567.08897 | 276.05 | 15.68 | 20.65 | 21.01 | 20.02 | 3.56E-45 | 3.65E-14 | 3.65E-14 | 3.65E-14 | 6.92E-01 | 2.58E-01 | 1.98E-02 |
| 567.14098 | 72.7   | 15.22 | 16.71 | 17.20 | 14.80 | 4.33E-17 | 9.98E-07 | 4.64E-11 | 4.60E-01 | 3.17E-01 | 2.75E-09 | 1.61E-13 |
| 567.28968 | 275.04 | 16.26 | 19.92 | 20.25 | 19.14 | 1.51E-37 | 3.65E-14 | 3.65E-14 | 7.29E-14 | 6.39E-01 | 3.81E-02 | 8.31E-04 |
| 567.45497 | 53.31  | 14.73 | 14.60 | 11.19 | 13.52 | 1.82E-09 | 9.96E-01 | 8.75E-09 | 1.63E-01 | 8.97E-08 | 2.79E-01 | 6.63E-04 |
| 567.48964 | 274.44 | 13.00 | 18.23 | 18.47 | 17.15 | 1.00E-36 | 3.65E-14 | 3.65E-14 | 7.25E-14 | 9.37E-01 | 4.40E-02 | 7.72E-03 |
| 567.51236 | 53.55  | 13.80 | 16.61 | 14.59 | 14.78 | 1.79E-11 | 3.54E-12 | 1.36E-01 | 4.79E-02 | 1.11E-06 | 2.60E-05 | 9.58E-01 |
| 567.65555 | 48.88  | 15.26 | 16.44 | 16.53 | 15.03 | 3.82E-05 | 8.83E-03 | 3.46E-03 | 9.34E-01 | 9.95E-01 | 2.32E-03 | 8.68E-04 |
| 567.69019 | 275.2  | 15.31 | 16.56 | 17.02 | 16.19 | 2.05E-08 | 4.81E-05 | 8.12E-09 | 9.81E-03 | 3.47E-01 | 5.92E-01 | 2.21E-02 |
| 567.7917  | 49.65  | 10.21 | 14.30 | 14.71 | 13.78 | 7.26E-32 | 4.16E-14 | 3.65E-14 | 7.64E-14 | 6.67E-01 | 4.97E-01 | 5.86E-02 |
| 567.88586 | 47.57  | 16.30 | 15.45 | 15.02 | 15.38 | 6.16E-04 | 3.74E-02 | 3.07E-04 | 2.47E-02 | 5.30E-01 | 9.97E-01 | 6.86E-01 |
| 568.01188 | 52.71  | 16.79 | 19.04 | 18.65 | 17.58 | 6.06E-18 | 7.45E-14 | 3.58E-12 | 1.02E-02 | 4.29E-01 | 4.06E-07 | 2.72E-04 |
| 568.07683 | 74.38  | 14.13 | 17.52 | 17.17 | 15.62 | 1.46E-11 | 2.21E-10 | 9.46E-09 | 1.74E-02 | 8.94E-01 | 1.52E-03 | 1.38E-02 |
| 568.17937 | 95.77  | 11.06 | 14.06 | 11.46 | 12.70 | 2.99E-05 | 3.57E-05 | 9.22E-01 | 6.63E-02 | 6.86E-04 | 2.00E-01 | 2.64E-01 |
| 568.33956 | 28.14  | 21.84 | 21.64 | 21.79 | 21.61 | 4.48E-01 | 5.94E-01 | 9.91E-01 | 5.36E-01 | 7.85E-01 | 9.99E-01 | 7.29E-01 |
| 568.52057 | 45.67  | 19.40 | 18.15 | 17.72 | 17.38 | 7.57E-09 | 6.84E-04 | 1.60E-06 | 2.03E-08 | 5.58E-01 | 1.08E-01 | 7.42E-01 |
| 568.658   | 46.91  | 16.56 | 18.78 | 18.86 | 18.12 | 1.02E-19 | 7.38E-14 | 7.42E-14 | 1.77E-08 | 9.87E-01 | 5.86E-02 | 2.27E-02 |
| 568.70014 | 44.96  | 15.48 | 17.23 | 17.76 | 16.67 | 7.67E-17 | 1.07E-10 | 7.34E-14 | 2.67E-05 | 1.62E-01 | 1.44E-01 | 2.38E-04 |
| 568.74575 | 46.91  | 16.01 | 18.42 | 18.40 | 18.17 | 1.50E-32 | 3.72E-14 | 3.72E-14 | 6.38E-14 | 1.00E+00 | 6.22E-01 | 6.65E-01 |
| 568.78956 | 47.71  | 16.74 | 17.76 | 18.00 | 17.03 | 1.25E-09 | 7.52E-06 | 1.39E-08 | 5.21E-01 | 6.52E-01 | 4.72E-03 | 5.40E-05 |
| 568.871   | 51.84  | 17.37 | 16.29 | 17.01 | 15.90 | 2.94E-05 | 4.29E-03 | 6.65E-01 | 5.36E-05 | 1.20E-01 | 6.37E-01 | 4.96E-03 |
| 568.87232 | 268.32 | 13.05 | 15.38 | 15.46 | 14.89 | 6.79E-10 | 4.93E-08 | 1.16E-08 | 4.19E-05 | 9.97E-01 | 6.26E-01 | 4.93E-01 |

|           |        |       |       |       |       |          |          |          |          |          |          |          |
|-----------|--------|-------|-------|-------|-------|----------|----------|----------|----------|----------|----------|----------|
| 569.00815 | 53.23  | 17.39 | 19.63 | 19.27 | 18.47 | 2.27E-20 | 7.28E-14 | 9.18E-14 | 2.48E-05 | 3.77E-01 | 8.92E-06 | 4.13E-03 |
| 569.1593  | 268.89 | 14.23 | 14.69 | 15.07 | 14.37 | 1.69E-03 | 1.80E-01 | 1.29E-03 | 9.28E-01 | 3.56E-01 | 5.49E-01 | 1.90E-02 |
| 569.34178 | 27.72  | 20.39 | 19.89 | 20.08 | 19.83 | 6.07E-03 | 1.95E-02 | 2.51E-01 | 7.90E-03 | 7.10E-01 | 9.84E-01 | 5.00E-01 |
| 569.65297 | 48.78  | 14.22 | 16.31 | 16.15 | 15.01 | 1.14E-07 | 1.07E-06 | 6.36E-06 | 1.94E-01 | 9.77E-01 | 9.62E-03 | 2.92E-02 |
| 569.74552 | 49.07  | 12.36 | 16.34 | 16.37 | 14.69 | 1.80E-39 | 3.65E-14 | 3.65E-14 | 1.23E-13 | 9.99E-01 | 2.45E-07 | 1.06E-07 |
| 569.85965 | 51.12  | 18.00 | 17.20 | 17.79 | 15.84 | 7.72E-06 | 2.32E-01 | 9.56E-01 | 7.54E-06 | 5.28E-01 | 1.41E-02 | 1.05E-04 |
| 570.05312 | 89.62  | 13.97 | 16.70 | 15.50 | 14.41 | 8.47E-18 | 7.54E-14 | 1.40E-06 | 4.40E-01 | 4.27E-04 | 1.29E-11 | 2.47E-03 |
| 570.10996 | 145.91 | 8.24  | 12.08 | 13.27 | 11.53 | 2.81E-30 | 7.35E-14 | 3.65E-14 | 9.17E-14 | 1.29E-02 | 5.10E-01 | 1.03E-04 |
| 570.11032 | 256.28 | 11.78 | 15.09 | 14.56 | 13.32 | 3.31E-07 | 6.06E-07 | 3.05E-05 | 6.40E-02 | 8.27E-01 | 2.95E-02 | 2.01E-01 |
| 570.2827  | 33.92  | 18.66 | 16.52 | 16.15 | 17.68 | 1.07E-13 | 1.85E-09 | 1.28E-12 | 1.89E-02 | 6.69E-01 | 4.73E-03 | 6.07E-05 |
| 570.35297 | 27.65  | 20.37 | 19.94 | 19.89 | 19.22 | 5.54E-07 | 1.12E-01 | 5.51E-02 | 7.44E-08 | 9.93E-01 | 2.16E-03 | 4.78E-03 |
| 570.51819 | 45.73  | 19.59 | 18.31 | 17.99 | 17.68 | 1.04E-09 | 8.90E-05 | 4.18E-07 | 4.01E-09 | 7.04E-01 | 1.63E-01 | 7.22E-01 |
| 570.60876 | 46.59  | 16.29 | 17.73 | 17.71 | 17.08 | 5.74E-14 | 8.57E-12 | 9.13E-12 | 4.72E-04 | 1.00E+00 | 8.38E-03 | 9.83E-03 |
| 570.61163 | 258.72 | 10.83 | 13.40 | 13.36 | 12.01 | 7.62E-07 | 8.07E-06 | 8.77E-06 | 1.21E-01 | 1.00E+00 | 5.67E-02 | 6.27E-02 |
| 570.65612 | 47.01  | 15.18 | 17.10 | 17.23 | 16.87 | 5.84E-27 | 6.83E-14 | 4.74E-14 | 7.54E-14 | 9.07E-01 | 6.19E-01 | 2.40E-01 |
| 570.69758 | 44.87  | 13.95 | 15.17 | 15.93 | 14.78 | 2.12E-10 | 8.13E-05 | 3.45E-11 | 1.87E-02 | 3.71E-02 | 5.35E-01 | 5.15E-04 |
| 570.74379 | 47.12  | 15.45 | 18.36 | 18.42 | 18.04 | 7.84E-35 | 3.65E-14 | 3.65E-14 | 5.43E-14 | 9.92E-01 | 5.36E-01 | 3.62E-01 |
| 570.78272 | 46.92  | 12.54 | 13.89 | 13.66 | 13.87 | 9.09E-04 | 2.55E-03 | 1.62E-02 | 4.21E-03 | 9.38E-01 | 1.00E+00 | 9.55E-01 |
| 570.79413 | 45.84  | 15.39 | 15.27 | 14.89 | 15.26 | 5.84E-01 | 9.87E-01 | 5.31E-01 | 9.86E-01 | 7.60E-01 | 1.00E+00 | 7.84E-01 |
| 570.80037 | 275.89 | 14.84 | 14.15 | 14.51 | 14.36 | 2.72E-01 | 2.14E-01 | 7.95E-01 | 5.50E-01 | 7.45E-01 | 9.46E-01 | 9.74E-01 |
| 570.87425 | 38.11  | 14.59 | 15.99 | 14.76 | 16.96 | 7.06E-10 | 9.41E-04 | 9.68E-01 | 8.51E-09 | 6.15E-03 | 6.17E-02 | 1.79E-07 |
| 571.24291 | 33.14  | 12.64 | 14.02 | 12.13 | 15.08 | 2.34E-11 | 4.23E-03 | 5.81E-01 | 8.02E-08 | 4.92E-05 | 6.30E-02 | 2.16E-10 |
| 571.28632 | 33.59  | 15.83 | 10.58 | 11.12 | 15.30 | 5.13E-28 | 6.56E-14 | 7.24E-14 | 7.19E-01 | 6.92E-01 | 7.47E-14 | 2.50E-13 |
| 571.3018  | 268.02 | 15.19 | 14.41 | 15.26 | 14.79 | 5.02E-02 | 8.99E-02 | 9.97E-01 | 6.42E-01 | 6.24E-02 | 7.02E-01 | 5.31E-01 |
| 571.35808 | 27.17  | 18.74 | 17.73 | 18.00 | 17.24 | 3.27E-09 | 4.32E-05 | 4.35E-03 | 1.00E-09 | 6.32E-01 | 1.38E-01 | 5.37E-03 |
| 571.65049 | 48.87  | 13.07 | 14.46 | 14.41 | 12.61 | 6.86E-06 | 4.61E-03 | 6.26E-03 | 6.96E-01 | 9.99E-01 | 1.80E-04 | 2.51E-04 |
| 571.73932 | 49.38  | 11.74 | 17.01 | 17.19 | 15.80 | 2.27E-42 | 3.65E-14 | 3.65E-14 | 4.94E-14 | 9.57E-01 | 6.96E-03 | 1.12E-03 |
| 571.85615 | 50.04  | 17.74 | 16.62 | 16.76 | 14.55 | 7.95E-10 | 5.32E-02 | 1.07E-01 | 1.07E-10 | 9.90E-01 | 7.97E-05 | 1.86E-05 |
| 571.99435 | 54.35  | 14.86 | 13.37 | 15.18 | 13.41 | 8.45E-12 | 2.09E-06 | 6.70E-01 | 7.90E-06 | 1.44E-08 | 9.99E-01 | 7.01E-08 |
| 572.29784 | 277.18 | 14.69 | 14.28 | 14.01 | 14.69 | 3.69E-01 | 7.86E-01 | 4.14E-01 | 1.00E+00 | 9.39E-01 | 8.17E-01 | 4.70E-01 |
| 572.29854 | 33.55  | 17.36 | 14.71 | 13.81 | 15.70 | 7.98E-23 | 1.30E-13 | 5.12E-14 | 4.51E-06 | 3.12E-02 | 1.98E-02 | 3.00E-07 |
| 572.37096 | 27.05  | 19.33 | 18.44 | 18.49 | 18.12 | 2.51E-07 | 1.48E-04 | 3.24E-04 | 2.63E-07 | 9.96E-01 | 4.79E-01 | 3.44E-01 |
| 572.51545 | 45.77  | 19.03 | 17.42 | 17.23 | 17.00 | 3.21E-08 | 4.22E-05 | 2.88E-06 | 3.21E-07 | 9.53E-01 | 6.80E-01 | 9.28E-01 |
| 572.51683 | 273.74 | 12.70 | 13.91 | 14.41 | 12.87 | 2.72E-03 | 8.75E-02 | 5.12E-03 | 9.88E-01 | 7.84E-01 | 2.24E-01 | 2.47E-02 |
| 572.6064  | 46.65  | 16.80 | 18.95 | 18.92 | 17.53 | 9.14E-07 | 1.72E-05 | 1.80E-05 | 3.94E-01 | 1.00E+00 | 1.55E-02 | 1.68E-02 |
| 572.72711 | 49.19  | 15.16 | 6.76  | 6.83  | 7.65  | 9.61E-30 | 3.65E-14 | 3.65E-14 | 3.65E-14 | 9.99E-01 | 1.92E-01 | 2.40E-01 |
| 572.74361 | 47.95  | 13.87 | 16.45 | 16.50 | 16.50 | 5.54E-36 | 3.67E-14 | 3.65E-14 | 3.67E-14 | 9.93E-01 | 9.93E-01 | 1.00E+00 |
| 572.79984 | 279    | 14.65 | 14.25 | 13.87 | 14.34 | 1.16E-01 | 6.01E-01 | 6.88E-02 | 7.89E-01 | 6.47E-01 | 9.93E-01 | 4.92E-01 |
| 572.83475 | 29.58  | 12.66 | 16.26 | 16.16 | 15.95 | 1.54E-16 | 3.24E-13 | 6.99E-13 | 5.40E-11 | 9.96E-01 | 9.15E-01 | 9.71E-01 |
| 573.06614 | 57.45  | 10.55 | 13.91 | 12.13 | 13.67 | 9.02E-08 | 4.63E-07 | 4.33E-02 | 5.66E-06 | 2.31E-02 | 9.84E-01 | 7.34E-02 |
| 573.0867  | 93.51  | 14.10 | 14.25 | 13.91 | 13.34 | 4.29E-02 | 9.63E-01 | 9.34E-01 | 9.06E-02 | 7.24E-01 | 3.44E-02 | 3.09E-01 |
| 573.15178 | 98.34  | 9.25  | 13.97 | 10.09 | 14.40 | 6.07E-16 | 1.03E-10 | 5.81E-01 | 7.38E-12 | 2.30E-07 | 9.31E-01 | 1.96E-08 |
| 573.37448 | 27.13  | 17.24 | 15.27 | 15.23 | 13.73 | 1.41E-08 | 1.15E-03 | 7.60E-04 | 2.33E-09 | 1.00E+00 | 2.96E-02 | 3.37E-02 |
| 573.7371  | 49.28  | 13.48 | 15.41 | 15.73 | 14.45 | 3.23E-21 | 7.92E-14 | 7.45E-14 | 1.91E-04 | 5.11E-01 | 3.21E-04 | 6.36E-07 |
| 573.82802 | 43.59  | 16.02 | 16.36 | 17.09 | 16.19 | 3.86E-05 | 4.53E-01 | 2.49E-05 | 8.86E-01 | 1.09E-02 | 9.01E-01 | 1.33E-03 |
| 574.00971 | 84.69  | 11.32 | 17.40 | 18.20 | 15.87 | 4.49E-40 | 3.65E-14 | 3.65E-14 | 7.36E-14 | 2.86E-01 | 6.65E-03 | 5.78E-06 |
| 574.08551 | 72     | 14.56 | 14.43 | 12.91 | 12.01 | 4.37E-06 | 9.94E-01 | 9.81E-03 | 2.74E-05 | 2.83E-02 | 1.44E-04 | 3.73E-01 |
| 574.29297 | 271.44 | 14.97 | 17.48 | 20.23 | 17.93 | 2.10E-30 | 9.99E-10 | 3.65E-14 | 2.49E-12 | 5.80E-11 | 6.59E-01 | 1.01E-07 |
| 574.31396 | 34.68  | 16.52 | 12.77 | 11.95 | 14.17 | 6.94E-23 | 7.45E-14 | 5.83E-14 | 6.88E-07 | 2.28E-01 | 9.99E-03 | 5.86E-06 |
| 574.44364 | 53.19  | 14.45 | 17.09 | 16.76 | 15.65 | 9.38E-10 | 5.30E-09 | 2.71E-07 | 2.52E-02 | 8.65E-01 | 6.22E-03 | 5.27E-02 |
| 574.47785 | 273.69 | 15.45 | 14.51 | 15.09 | 15.33 | 4.71E-04 | 3.45E-04 | 3.77E-01 | 9.59E-01 | 7.22E-02 | 4.68E-03 | 7.33E-01 |
| 574.49332 | 269    | 16.48 | 18.03 | 20.92 | 18.47 | 8.40E-28 | 4.40E-05 | 3.65E-14 | 1.93E-07 | 1.11E-13 | 6.13E-01 | 2.42E-10 |
| 574.51313 | 46.03  | 17.49 | 15.36 | 14.55 | 15.21 | 1.90E-09 | 2.56E-05 | 2.02E-09 | 1.02E-05 | 2.94E-01 | 9.89E-01 | 5.00E-01 |
| 574.60453 | 46.77  | 17.26 | 18.69 | 18.64 | 18.26 | 1.62E-10 | 3.64E-09 | 9.75E-09 | 9.45E-05 | 9.96E-01 | 2.58E-01 | 3.65E-01 |
| 574.65573 | 47.44  | 9.35  | 10.98 | 12.67 | 11.05 | 9.81E-12 | 8.08E-04 | 6.80E-13 | 6.28E-04 | 7.40E-04 | 9.99E-01 | 1.91E-03 |
| 574.69356 | 272.41 | 15.05 | 17.08 | 19.86 | 17.75 | 2.86E-23 | 7.88E-06 | 4.03E-14 | 4.76E-09 | 1.52E-09 | 4.20E-01 | 9.95E-06 |
| 574.69426 | 47.43  | 16.05 | 17.95 | 17.93 | 17.80 | 2.67E-19 | 7.63E-14 | 7.84E-14 | 9.26E-13 | 9.99E-01 | 9.00E-01 | 9.40E-01 |
| 574.82664 | 43.29  | 12.83 | 16.94 | 17.25 | 16.22 | 8.50E-26 | 7.14E-14 | 5.16E-14 | 1.23E-13 | 8.74E-01 | 3.18E-01 | 6.80E-02 |
| 574.89054 | 275.01 | 14.32 | 16.81 | 19.60 | 17.17 | 1.44E-22 | 7.30E-07 | 4.21E-14 | 2.76E-08 | 5.09E-08 | 8.76E-01 | 4.68E-06 |
| 574.9824  | 42.75  | 11.92 | 15.67 | 17.45 | 15.69 | 2.58E-38 | 6.38E-14 | 3.65E-14 | 6.78E-14 | 5.08E-06 | 1.00E+00 | 1.18E-05 |
| 575.00009 | 56.74  | 15.00 | 18.01 | 18.18 | 16.17 | 3.56E-14 | 9.21E-11 | 5.38E-12 | 3.69E-02 | 9.79E-01 | 3.37E-04 | 5.97E-05 |
| 575.0948  | 265.22 | 15.72 | 15.28 | 17.89 | 16.11 | 1.24E-18 | 3.49E-01 | 1.46E-13 | 4.64E-01 | 7.45E-14 | 1.69E-02 | 5.82E-09 |
| 575.12496 | 41.05  | 20.02 | 18.80 | 19.56 | 19.85 | 5.02E-05 | 3.36E-05 | 3.01E-01 | 9.22E-01 | 2.45E-02 | 1.15E-03 | 7.31E-01 |
| 575.29594 | 266.85 | 15.83 | 14.57 | 16.21 | 15.13 | 1.35E-05 | 1.18E-03 | 6.47E-01 | 1.80E-01 | 1.62E-05 | 3.84E-01 | 1.21E-02 |
| 575.38723 | 24.2   | 8.28  | 16.31 | 8.19  | 16.44 | 1.15E-43 | 3.65E-14 | 9.99E-01 | 3.65E-14 | 3.65E-14 | 9.97E-01 | 3.65E-14 |
| 575.44154 | 52.49  | 13.23 | 16.40 | 15.11 | 13.75 | 3.89E-06 | 4.50E-06 | 1.39E-02 | 8.48E-01 | 1.81E-01 | 4.62E-04 | 1.64E-01 |
| 575.50267 | 173.79 | 15.10 | 12.28 | 12.15 | 12.85 | 1.87E-10 | 2.31E-08 | 3.29E-09 | 1.89E-05 | 9.92E-01 | 6.52E-01 | 4.68E-01 |
| 575.82254 | 49.95  | 14.11 | 15.92 | 16.69 | 15.26 | 4.74E-16 | 6.26E-09 | 7.28E-14 | 6.37E-04 | 4.15E-02 | 1.25E-01 | 1.59E-05 |

|           |        |       |       |       |       |          |          |          |          |          |          |          |
|-----------|--------|-------|-------|-------|-------|----------|----------|----------|----------|----------|----------|----------|
| 575.99457 | 53.99  | 14.21 | 17.40 | 16.98 | 15.13 | 1.25E-12 | 6.84E-11 | 1.03E-08 | 1.86E-01 | 7.95E-01 | 1.62E-05 | 5.81E-04 |
| 576.12804 | 41.44  | 17.62 | 15.32 | 16.29 | 16.95 | 2.82E-06 | 1.05E-06 | 1.03E-02 | 4.20E-01 | 1.18E-01 | 2.13E-03 | 4.61E-01 |
| 576.39656 | 24.41  | 13.46 | 15.63 | 10.66 | 16.24 | 2.25E-35 | 1.59E-07 | 9.78E-12 | 5.56E-11 | 3.65E-14 | 4.20E-01 | 3.65E-14 |
| 576.47033 | 265.38 | 15.24 | 13.38 | 14.39 | 13.85 | 2.42E-04 | 1.39E-04 | 1.94E-01 | 9.86E-03 | 1.04E-01 | 7.37E-01 | 6.26E-01 |
| 576.50681 | 53.49  | 16.12 | 13.90 | 14.25 | 14.98 | 2.32E-04 | 2.45E-04 | 2.73E-03 | 1.59E-01 | 9.13E-01 | 2.23E-01 | 5.67E-01 |
| 576.55148 | 50.5   | 18.04 | 17.07 | 16.45 | 16.74 | 1.75E-04 | 4.36E-02 | 1.30E-04 | 4.08E-03 | 3.73E-01 | 8.43E-01 | 8.80E-01 |
| 576.60286 | 46.96  | 15.41 | 17.55 | 17.36 | 16.84 | 2.91E-12 | 4.40E-11 | 1.14E-09 | 2.28E-05 | 9.30E-01 | 1.15E-01 | 3.41E-01 |
| 576.63844 | 266.32 | 15.18 | 13.93 | 14.84 | 14.74 | 8.13E-02 | 5.15E-02 | 8.96E-01 | 8.14E-01 | 2.58E-01 | 3.93E-01 | 9.97E-01 |
| 576.69075 | 47.47  | 16.79 | 18.97 | 19.08 | 18.90 | 1.22E-34 | 3.72E-14 | 3.65E-14 | 4.19E-14 | 9.31E-01 | 9.82E-01 | 7.67E-01 |
| 576.72914 | 44.44  | 14.28 | 17.20 | 17.64 | 16.92 | 1.84E-21 | 7.69E-14 | 7.32E-14 | 2.19E-12 | 5.81E-01 | 8.46E-01 | 1.67E-01 |
| 576.80747 | 267.12 | 15.85 | 14.84 | 15.08 | 15.44 | 7.75E-02 | 6.38E-02 | 2.27E-01 | 7.59E-01 | 9.36E-01 | 5.00E-01 | 8.35E-01 |
| 576.82076 | 44.1   | 14.07 | 17.31 | 17.67 | 16.49 | 1.14E-16 | 1.23E-12 | 7.83E-14 | 2.41E-07 | 8.35E-01 | 2.36E-01 | 3.49E-02 |
| 576.8963  | 24.58  | 12.45 | 14.76 | 10.18 | 15.87 | 1.28E-43 | 6.27E-11 | 9.34E-11 | 7.27E-14 | 3.65E-14 | 6.98E-03 | 3.65E-14 |
| 576.97286 | 265.48 | 14.71 | 14.56 | 15.40 | 15.12 | 3.01E-01 | 9.89E-01 | 4.59E-01 | 8.37E-01 | 3.10E-01 | 6.83E-01 | 9.42E-01 |
| 576.97659 | 54.97  | 18.72 | 16.68 | 17.88 | 16.84 | 2.66E-09 | 2.73E-08 | 5.70E-02 | 6.55E-07 | 3.06E-03 | 9.71E-01 | 1.71E-02 |
| 577.30383 | 277.33 | 16.34 | 14.79 | 14.89 | 15.33 | 5.12E-04 | 9.49E-04 | 2.10E-03 | 7.57E-02 | 9.95E-01 | 5.83E-01 | 7.26E-01 |
| 577.36161 | 56.21  | 13.42 | 14.05 | 13.20 | 12.96 | 3.48E-02 | 3.12E-01 | 9.31E-01 | 6.05E-01 | 1.08E-01 | 2.61E-02 | 9.20E-01 |
| 577.51931 | 135.72 | 15.15 | 12.61 | 12.74 | 13.89 | 1.16E-13 | 7.67E-12 | 4.99E-11 | 1.84E-03 | 9.83E-01 | 2.42E-03 | 7.43E-03 |
| 577.68753 | 49.66  | 10.70 | 15.14 | 14.53 | 13.02 | 5.30E-14 | 5.27E-13 | 2.20E-10 | 3.67E-04 | 7.14E-01 | 2.28E-03 | 5.02E-02 |
| 577.8711  | 82.5   | 11.38 | 15.08 | 13.59 | 12.96 | 2.11E-08 | 3.52E-09 | 7.18E-04 | 3.75E-02 | 5.52E-02 | 3.08E-03 | 7.21E-01 |
| 577.91074 | 49.23  | 18.31 | 16.48 | 13.78 | 15.23 | 3.32E-19 | 3.32E-04 | 7.38E-14 | 8.41E-10 | 7.64E-08 | 4.23E-02 | 1.20E-02 |
| 577.96685 | 304.87 | 14.49 | 15.20 | 14.32 | 12.04 | 4.63E-15 | 1.67E-01 | 9.59E-01 | 2.20E-10 | 6.20E-02 | 7.89E-14 | 7.74E-09 |
| 578.00189 | 53.74  | 16.43 | 19.14 | 18.24 | 17.38 | 3.20E-12 | 1.81E-12 | 2.21E-06 | 4.02E-02 | 5.99E-02 | 2.17E-05 | 9.35E-02 |
| 578.05107 | 277.81 | 15.26 | 15.47 | 15.70 | 14.48 | 6.19E-02 | 9.66E-01 | 7.48E-01 | 3.13E-01 | 9.56E-01 | 1.52E-01 | 4.47E-02 |
| 578.17623 | 278.32 | 15.43 | 18.05 | 17.77 | 16.91 | 4.23E-14 | 6.77E-13 | 7.81E-11 | 1.08E-04 | 8.33E-01 | 7.12E-03 | 6.94E-02 |
| 578.30155 | 278.81 | 16.01 | 18.47 | 18.41 | 17.47 | 3.35E-14 | 3.42E-12 | 7.23E-12 | 8.74E-05 | 9.98E-01 | 1.86E-02 | 2.94E-02 |
| 578.42675 | 278.47 | 15.69 | 18.35 | 18.17 | 17.01 | 6.12E-15 | 4.79E-13 | 7.62E-12 | 8.19E-04 | 9.51E-01 | 1.03E-03 | 5.70E-03 |
| 578.50322 | 53.48  | 10.92 | 16.66 | 13.73 | 14.42 | 2.23E-17 | 7.53E-14 | 1.17E-05 | 9.91E-08 | 1.01E-05 | 1.86E-03 | 6.78E-01 |
| 578.55119 | 275.6  | 11.75 | 15.96 | 15.95 | 15.36 | 2.41E-15 | 2.03E-12 | 1.39E-12 | 3.43E-09 | 1.00E+00 | 7.29E-01 | 7.29E-01 |
| 578.55171 | 48.37  | 18.75 | 18.74 | 18.50 | 17.64 | 8.41E-02 | 1.00E+00 | 9.46E-01 | 9.10E-02 | 9.57E-01 | 1.12E-01 | 2.89E-01 |
| 578.67869 | 277.44 | 15.32 | 16.14 | 16.00 | 15.38 | 7.37E-03 | 2.14E-02 | 7.60E-02 | 9.96E-01 | 9.62E-01 | 5.98E-02 | 1.68E-01 |
| 578.6874  | 46.95  | 15.41 | 18.10 | 18.28 | 17.85 | 2.36E-36 | 3.65E-14 | 3.65E-14 | 4.65E-14 | 8.39E-01 | 6.80E-01 | 2.16E-01 |
| 578.72924 | 45.25  | 14.88 | 16.95 | 17.40 | 16.62 | 2.27E-25 | 7.47E-14 | 4.21E-14 | 1.30E-12 | 1.89E-01 | 4.81E-01 | 4.42E-03 |
| 578.7839  | 35.32  | 15.09 | 17.27 | 17.57 | 17.26 | 3.96E-18 | 1.29E-12 | 7.49E-14 | 5.92E-12 | 7.15E-01 | 1.00E+00 | 6.99E-01 |
| 578.80243 | 276.72 | 15.59 | 15.17 | 15.12 | 14.78 | 1.40E-01 | 5.92E-01 | 4.94E-01 | 8.97E-02 | 9.99E-01 | 6.94E-01 | 7.68E-01 |
| 578.81969 | 46.61  | 15.20 | 14.99 | 15.04 | 14.45 | 1.05E-01 | 9.02E-01 | 9.48E-01 | 7.45E-02 | 9.99E-01 | 3.22E-01 | 2.48E-01 |
| 578.90521 | 50.11  | 17.21 | 17.06 | 16.50 | 16.80 | 2.68E-02 | 9.37E-01 | 2.08E-02 | 3.68E-01 | 1.16E-01 | 7.38E-01 | 6.55E-01 |
| 578.97091 | 54.57  | 15.49 | 11.32 | 13.65 | 11.40 | 5.41E-09 | 1.01E-07 | 4.72E-02 | 3.87E-07 | 8.68E-03 | 1.00E+00 | 1.55E-02 |
| 579.00047 | 53.97  | 14.02 | 17.19 | 16.02 | 15.61 | 3.03E-11 | 4.52E-12 | 1.32E-05 | 1.46E-03 | 3.35E-02 | 2.26E-03 | 7.76E-01 |
| 579.0739  | 198.53 | 15.35 | 18.93 | 18.33 | 17.39 | 1.41E-39 | 3.65E-14 | 3.65E-14 | 7.58E-14 | 4.46E-02 | 4.16E-09 | 6.35E-04 |
| 579.47446 | 266.52 | 15.69 | 16.75 | 17.69 | 16.57 | 1.93E-11 | 3.58E-04 | 1.48E-12 | 6.12E-03 | 2.53E-03 | 9.13E-01 | 2.91E-04 |
| 579.67559 | 264.46 | 15.97 | 16.93 | 17.53 | 16.41 | 3.47E-07 | 3.00E-03 | 1.73E-07 | 4.03E-01 | 1.45E-01 | 2.74E-01 | 7.27E-04 |
| 579.6842  | 49.45  | 13.33 | 12.94 | 12.69 | 12.78 | 4.00E-01 | 7.69E-01 | 3.73E-01 | 5.51E-01 | 9.26E-01 | 9.83E-01 | 9.96E-01 |
| 579.77176 | 49.48  | 13.10 | 16.00 | 16.32 | 14.93 | 6.96E-32 | 4.05E-14 | 3.65E-14 | 3.15E-11 | 5.81E-01 | 2.94E-04 | 9.70E-07 |
| 579.87517 | 266.29 | 15.79 | 16.79 | 17.55 | 16.40 | 1.95E-10 | 3.04E-04 | 3.55E-11 | 7.08E-02 | 1.54E-02 | 4.27E-01 | 7.37E-05 |
| 579.89291 | 51.87  | 17.58 | 19.18 | 19.28 | 18.51 | 5.99E-18 | 1.04E-13 | 7.54E-14 | 2.28E-05 | 9.65E-01 | 5.07E-03 | 8.85E-04 |
| 580.0148  | 282.87 | 15.49 | 16.29 | 15.97 | 15.40 | 1.99E-02 | 4.98E-02 | 3.96E-01 | 9.92E-01 | 7.45E-01 | 3.47E-02 | 2.92E-01 |
| 580.07579 | 264.19 | 15.31 | 14.37 | 15.38 | 14.50 | 7.43E-04 | 9.61E-03 | 9.96E-01 | 4.24E-02 | 6.13E-03 | 9.76E-01 | 2.82E-02 |
| 580.10215 | 62.73  | 17.98 | 18.59 | 18.94 | 17.79 | 2.97E-05 | 7.36E-02 | 8.50E-04 | 8.77E-01 | 5.28E-01 | 1.46E-02 | 1.10E-04 |
| 580.20857 | 138.86 | 9.52  | 12.74 | 11.16 | 11.61 | 1.21E-06 | 2.78E-07 | 2.06E-02 | 2.37E-03 | 3.61E-02 | 2.41E-01 | 8.75E-01 |
| 580.29195 | 23.3   | 15.86 | 19.02 | 18.00 | 18.00 | 1.70E-16 | 7.34E-14 | 7.26E-09 | 2.42E-08 | 1.84E-02 | 2.43E-02 | 1.00E+00 |
| 580.54943 | 47.54  | 19.25 | 18.84 | 18.56 | 18.12 | 5.40E-03 | 5.36E-01 | 1.13E-01 | 2.67E-03 | 8.23E-01 | 1.36E-01 | 5.37E-01 |
| 580.63866 | 46.61  | 16.17 | 18.19 | 18.18 | 17.67 | 1.19E-25 | 6.27E-14 | 6.18E-14 | 1.21E-12 | 1.00E+00 | 4.08E-02 | 4.81E-02 |
| 580.6885  | 47.79  | 12.51 | 14.40 | 15.51 | 14.76 | 2.20E-12 | 1.13E-05 | 1.33E-12 | 2.62E-07 | 2.92E-02 | 8.17E-01 | 2.59E-01 |
| 580.77023 | 48.86  | 15.07 | 18.22 | 18.41 | 18.28 | 1.95E-58 | 3.65E-14 | 3.65E-14 | 3.65E-14 | 7.16E-01 | 9.91E-01 | 8.83E-01 |
| 580.90015 | 52.27  | 15.85 | 15.16 | 15.05 | 15.68 | 6.23E-02 | 1.85E-01 | 8.81E-02 | 9.58E-01 | 9.89E-01 | 4.91E-01 | 3.09E-01 |
| 581.10574 | 63.58  | 13.93 | 13.42 | 14.33 | 13.17 | 1.08E-02 | 4.88E-01 | 6.59E-01 | 1.69E-01 | 6.30E-02 | 9.13E-01 | 1.17E-02 |
| 581.16224 | 151.56 | 7.84  | 12.45 | 14.55 | 12.08 | 1.22E-48 | 3.65E-14 | 3.65E-14 | 3.94E-14 | 7.24E-08 | 7.45E-01 | 6.01E-10 |
| 581.177   | 307.09 | 14.60 | 17.37 | 17.25 | 17.04 | 2.39E-54 | 3.65E-14 | 3.65E-14 | 3.65E-14 | 8.75E-01 | 1.62E-01 | 5.23E-01 |
| 581.67854 | 307.04 | 14.07 | 15.44 | 15.44 | 14.86 | 2.04E-09 | 5.16E-08 | 4.20E-08 | 4.86E-03 | 1.00E+00 | 8.29E-02 | 8.23E-02 |
| 581.76844 | 49.51  | 12.89 | 16.69 | 16.83 | 15.39 | 1.87E-38 | 3.65E-14 | 3.65E-14 | 7.36E-14 | 9.60E-01 | 4.96E-05 | 4.65E-06 |
| 581.89182 | 51.12  | 15.98 | 18.63 | 18.57 | 17.80 | 1.02E-22 | 7.17E-14 | 7.45E-14 | 6.09E-10 | 9.96E-01 | 1.49E-02 | 2.64E-02 |
| 581.97122 | 143.23 | 10.90 | 16.07 | 14.79 | 14.00 | 1.47E-18 | 7.52E-14 | 9.39E-12 | 1.58E-07 | 8.06E-02 | 1.34E-03 | 4.80E-01 |
| 582.29536 | 35.02  | 17.10 | 19.60 | 18.85 | 18.94 | 2.85E-19 | 7.41E-14 | 9.06E-11 | 5.00E-11 | 1.96E-02 | 6.37E-02 | 9.86E-01 |
| 582.43016 | 51.4   | 14.90 | 16.48 | 16.31 | 14.58 | 2.30E-09 | 1.53E-05 | 1.29E-04 | 7.74E-01 | 9.54E-01 | 6.66E-07 | 6.14E-06 |
| 582.54688 | 48.53  | 18.61 | 19.10 | 18.38 | 18.84 | 1.13E-01 | 3.51E-01 | 8.62E-01 | 8.73E-01 | 8.56E-02 | 8.42E-01 | 4.51E-01 |
| 582.6365  | 46.78  | 17.34 | 19.10 | 19.09 | 18.71 | 2.04E-22 | 7.29E-14 | 7.24E-14 | 9.88E-12 | 1.00E+00 | 1.52E-01 | 1.66E-01 |
| 582.76223 | 49.7   | 15.20 | 18.08 | 18.37 | 17.33 | 6.34E-29 | 5.41E-14 | 3.72E-14 | 4.13E-13 | 7.04E-01 | 3.24E-02 | 9.71E-04 |

|           |        |       |       |       |       |          |          |          |          |          |          |          |
|-----------|--------|-------|-------|-------|-------|----------|----------|----------|----------|----------|----------|----------|
| 582.86236 | 53.87  | 16.48 | 13.76 | 12.52 | 13.63 | 9.64E-13 | 1.02E-06 | 6.23E-13 | 5.57E-07 | 7.59E-02 | 9.94E-01 | 1.54E-01 |
| 582.95585 | 252.49 | 11.54 | 15.52 | 16.96 | 15.76 | 1.36E-15 | 7.11E-09 | 7.69E-14 | 2.13E-09 | 1.11E-01 | 9.83E-01 | 2.61E-01 |
| 582.98552 | 52.62  | 19.69 | 20.94 | 21.27 | 19.99 | 3.89E-18 | 1.95E-10 | 7.43E-14 | 3.46E-01 | 2.55E-01 | 7.35E-06 | 4.89E-10 |
| 582.99101 | 255.42 | 15.42 | 15.80 | 16.09 | 15.61 | 4.48E-01 | 8.06E-01 | 3.85E-01 | 9.73E-01 | 9.10E-01 | 9.74E-01 | 7.02E-01 |
| 583.29895 | 35     | 14.30 | 17.16 | 16.72 | 16.91 | 3.09E-16 | 1.24E-13 | 9.58E-11 | 1.59E-11 | 5.83E-01 | 8.98E-01 | 9.50E-01 |
| 583.42887 | 52.56  | 14.42 | 15.72 | 15.61 | 13.60 | 8.29E-09 | 1.42E-03 | 3.99E-03 | 1.07E-01 | 9.89E-01 | 2.03E-07 | 7.58E-07 |
| 583.63078 | 48.8   | 14.80 | 14.50 | 14.31 | 13.81 | 1.49E-01 | 8.85E-01 | 6.40E-01 | 9.89E-02 | 9.74E-01 | 4.10E-01 | 6.62E-01 |
| 583.7657  | 49.41  | 13.64 | 13.71 | 13.62 | 12.82 | 9.37E-03 | 9.96E-01 | 1.00E+00 | 2.19E-02 | 9.92E-01 | 1.54E-02 | 3.18E-02 |
| 583.8552  | 51.33  | 16.02 | 14.76 | 15.43 | 15.30 | 1.75E-03 | 5.44E-04 | 2.36E-01 | 1.25E-01 | 1.71E-01 | 3.70E-01 | 9.82E-01 |
| 583.88958 | 45.6   | 13.17 | 15.50 | 14.90 | 15.48 | 3.35E-12 | 1.94E-10 | 2.17E-06 | 7.35E-10 | 3.00E-01 | 1.00E+00 | 3.49E-01 |
| 583.98667 | 53.31  | 16.06 | 17.29 | 17.63 | 15.89 | 2.18E-12 | 1.42E-05 | 1.18E-08 | 9.18E-01 | 5.47E-01 | 2.72E-06 | 2.57E-09 |
| 584.04905 | 68.8   | 14.34 | 14.14 | 13.04 | 13.75 | 1.04E-02 | 9.59E-01 | 7.74E-03 | 4.83E-01 | 4.43E-02 | 7.99E-01 | 3.52E-01 |
| 584.15886 | 122.57 | 12.55 | 12.41 | 11.07 | 12.60 | 3.05E-07 | 9.56E-01 | 3.21E-06 | 9.98E-01 | 6.59E-05 | 9.16E-01 | 5.78E-06 |
| 584.23867 | 34.84  | 12.88 | 14.90 | 14.28 | 15.67 | 8.46E-15 | 4.69E-09 | 7.04E-05 | 8.00E-14 | 2.13E-01 | 1.01E-01 | 2.12E-04 |
| 584.4988  | 46.51  | 16.60 | 14.99 | 14.97 | 14.08 | 1.59E-11 | 8.16E-06 | 4.86E-06 | 6.35E-12 | 1.00E+00 | 4.35E-02 | 4.81E-02 |
| 584.54434 | 47.23  | 16.79 | 15.87 | 14.60 | 15.57 | 2.58E-05 | 1.56E-01 | 5.40E-06 | 3.48E-02 | 2.56E-02 | 9.14E-01 | 1.55E-01 |
| 584.63501 | 46.93  | 16.65 | 18.67 | 18.58 | 18.11 | 4.55E-16 | 1.48E-13 | 4.90E-13 | 1.14E-07 | 9.86E-01 | 1.36E-01 | 2.55E-01 |
| 584.72801 | 46.5   | 15.75 | 18.19 | 18.06 | 17.96 | 3.96E-27 | 5.45E-14 | 6.72E-14 | 7.47E-14 | 9.38E-01 | 7.37E-01 | 9.67E-01 |
| 584.75879 | 49.84  | 14.45 | 17.23 | 17.35 | 15.74 | 1.37E-19 | 7.53E-14 | 7.44E-14 | 5.33E-04 | 9.86E-01 | 6.69E-05 | 1.28E-05 |
| 584.80436 | 265.59 | 12.96 | 13.90 | 15.07 | 14.58 | 6.11E-05 | 1.77E-01 | 3.80E-05 | 4.05E-03 | 6.58E-02 | 5.04E-01 | 7.42E-01 |
| 584.84723 | 51.33  | 15.79 | 16.78 | 17.02 | 16.32 | 1.90E-05 | 9.52E-04 | 1.87E-05 | 1.88E-01 | 8.12E-01 | 3.42E-01 | 5.54E-02 |
| 584.97208 | 265.57 | 15.14 | 14.67 | 15.55 | 14.89 | 4.31E-02 | 4.27E-01 | 5.38E-01 | 8.59E-01 | 2.99E-02 | 9.08E-01 | 1.78E-01 |
| 584.98226 | 53.08  | 17.18 | 18.50 | 18.87 | 17.48 | 2.45E-17 | 8.58E-10 | 7.92E-14 | 4.32E-01 | 2.54E-01 | 1.14E-05 | 8.44E-10 |
| 585.06266 | 85.13  | 11.47 | 17.03 | 14.99 | 14.56 | 1.82E-22 | 4.65E-14 | 2.31E-11 | 1.49E-08 | 3.17E-04 | 1.52E-05 | 8.28E-01 |
| 585.13927 | 264.25 | 13.95 | 14.77 | 15.79 | 14.79 | 2.82E-06 | 6.98E-02 | 3.99E-07 | 6.95E-02 | 1.55E-02 | 1.00E+00 | 2.32E-02 |
| 585.30615 | 269.66 | 15.48 | 14.75 | 15.74 | 15.60 | 1.04E-02 | 7.94E-02 | 8.23E-01 | 9.83E-01 | 9.01E-03 | 4.50E-02 | 9.69E-01 |
| 585.55458 | 54.89  | 15.91 | 19.86 | 18.86 | 19.24 | 2.10E-20 | 7.49E-14 | 6.29E-12 | 1.70E-13 | 6.89E-02 | 4.57E-01 | 7.95E-01 |
| 585.62757 | 47.19  | 14.65 | 14.44 | 13.80 | 12.70 | 1.93E-03 | 9.78E-01 | 3.46E-01 | 1.65E-03 | 6.19E-01 | 8.86E-03 | 1.80E-01 |
| 585.83602 | 52.68  | 17.43 | 12.72 | 14.41 | 13.83 | 1.11E-19 | 7.34E-14 | 1.72E-09 | 5.11E-12 | 2.44E-03 | 1.08E-01 | 6.32E-01 |
| 585.98836 | 55.74  | 16.45 | 18.81 | 18.73 | 17.01 | 1.30E-15 | 5.04E-12 | 1.81E-11 | 2.91E-01 | 9.93E-01 | 7.50E-07 | 2.21E-06 |
| 586.05657 | 69.77  | 13.99 | 18.44 | 17.57 | 17.63 | 9.29E-25 | 5.23E-14 | 7.45E-14 | 7.41E-14 | 1.47E-01 | 2.20E-01 | 9.99E-01 |
| 586.309   | 49.29  | 11.56 | 12.65 | 14.50 | 14.12 | 2.29E-06 | 2.55E-01 | 5.80E-06 | 1.98E-04 | 1.28E-02 | 8.82E-02 | 9.27E-01 |
| 586.49377 | 50.06  | 17.35 | 17.78 | 17.44 | 16.59 | 3.23E-04 | 3.49E-01 | 9.87E-01 | 2.28E-02 | 5.68E-01 | 1.20E-04 | 1.07E-02 |
| 586.55323 | 54.39  | 14.54 | 18.64 | 17.37 | 18.14 | 5.27E-18 | 7.54E-14 | 4.22E-09 | 7.57E-13 | 2.81E-02 | 7.12E-01 | 3.47E-01 |
| 586.5831  | 45.8   | 17.97 | 18.16 | 17.75 | 17.74 | 2.96E-01 | 8.54E-01 | 8.05E-01 | 7.95E-01 | 3.52E-01 | 3.55E-01 | 1.00E+00 |
| 586.63344 | 47.3   | 15.18 | 16.99 | 16.67 | 16.64 | 8.97E-10 | 3.85E-09 | 1.34E-06 | 5.34E-06 | 6.64E-01 | 6.25E-01 | 1.00E+00 |
| 586.7203  | 48.9   | 15.70 | 18.09 | 18.24 | 18.49 | 2.48E-34 | 4.50E-14 | 3.72E-14 | 3.65E-14 | 8.88E-01 | 2.64E-01 | 6.67E-01 |
| 586.75746 | 43.89  | 13.75 | 17.96 | 18.17 | 17.85 | 5.14E-61 | 3.65E-14 | 3.65E-14 | 3.65E-14 | 7.89E-01 | 9.65E-01 | 5.12E-01 |
| 586.85003 | 37.15  | 14.72 | 17.37 | 17.73 | 16.80 | 1.45E-22 | 7.44E-14 | 6.78E-14 | 9.63E-11 | 6.07E-01 | 2.42E-01 | 1.19E-02 |
| 586.88437 | 26.14  | 9.06  | 13.09 | 9.10  | 14.40 | 1.34E-21 | 1.26E-10 | 1.00E+00 | 7.57E-14 | 4.63E-10 | 1.37E-01 | 7.52E-14 |
| 586.98762 | 53.52  | 14.92 | 17.20 | 17.11 | 15.47 | 1.70E-12 | 1.11E-09 | 3.36E-09 | 3.98E-01 | 9.94E-01 | 1.79E-05 | 4.44E-05 |
| 587.05471 | 62.04  | 12.72 | 15.52 | 14.36 | 15.58 | 7.21E-10 | 2.21E-08 | 1.98E-03 | 2.45E-08 | 6.46E-02 | 9.99E-01 | 5.35E-02 |
| 587.0557  | 276.7  | 13.71 | 16.07 | 15.99 | 15.20 | 8.36E-07 | 4.87E-06 | 8.47E-06 | 1.05E-02 | 9.98E-01 | 2.97E-01 | 3.73E-01 |
| 587.17479 | 74.88  | 13.66 | 15.90 | 15.61 | 14.31 | 9.66E-04 | 2.18E-03 | 9.25E-03 | 7.38E-01 | 9.70E-01 | 7.74E-02 | 1.92E-01 |
| 587.18066 | 274.42 | 14.72 | 15.61 | 15.70 | 14.80 | 3.24E-02 | 1.40E-01 | 8.12E-02 | 9.98E-01 | 9.97E-01 | 2.51E-01 | 1.64E-01 |
| 587.30741 | 272.14 | 15.62 | 16.23 | 16.12 | 15.93 | 2.42E-01 | 2.20E-01 | 3.91E-01 | 7.83E-01 | 9.85E-01 | 8.01E-01 | 9.40E-01 |
| 587.43183 | 276.93 | 15.36 | 15.96 | 15.65 | 15.01 | 2.82E-02 | 2.02E-01 | 7.70E-01 | 6.89E-01 | 7.53E-01 | 1.95E-02 | 1.96E-01 |
| 587.45074 | 268.95 | 14.91 | 14.64 | 15.22 | 14.67 | 1.71E-01 | 7.62E-01 | 6.87E-01 | 8.38E-01 | 1.82E-01 | 9.99E-01 | 2.49E-01 |
| 587.55284 | 55.35  | 8.92  | 14.22 | 11.93 | 14.04 | 2.41E-12 | 6.76E-11 | 3.18E-04 | 7.60E-10 | 1.49E-02 | 9.96E-01 | 3.54E-02 |
| 587.55635 | 278.55 | 14.23 | 15.66 | 15.27 | 15.10 | 2.08E-03 | 1.15E-03 | 3.05E-02 | 1.12E-01 | 7.44E-01 | 5.11E-01 | 9.77E-01 |
| 587.71881 | 49.38  | 12.88 | 14.53 | 14.24 | 14.01 | 1.16E-04 | 1.23E-04 | 1.95E-03 | 2.04E-02 | 8.85E-01 | 5.76E-01 | 9.38E-01 |
| 587.83099 | 50.75  | 16.65 | 11.79 | 12.37 | 12.00 | 8.92E-27 | 5.65E-14 | 7.57E-14 | 7.12E-14 | 5.60E-01 | 9.68E-01 | 8.50E-01 |
| 587.89387 | 29.84  | 12.30 | 17.02 | 12.33 | 16.69 | 1.16E-40 | 3.65E-14 | 1.00E+00 | 3.94E-14 | 3.67E-14 | 8.11E-01 | 4.43E-14 |
| 588.10974 | 298.34 | 14.69 | 19.10 | 18.08 | 16.90 | 1.37E-16 | 7.36E-14 | 8.94E-11 | 7.52E-05 | 1.69E-01 | 1.34E-04 | 8.92E-02 |
| 588.17303 | 79.88  | 12.57 | 14.85 | 12.93 | 11.77 | 1.45E-10 | 4.23E-07 | 8.14E-01 | 2.32E-01 | 4.33E-05 | 9.69E-11 | 3.85E-01 |
| 588.40097 | 24.69  | 12.79 | 14.59 | 10.96 | 14.02 | 2.85E-16 | 5.95E-05 | 3.60E-05 | 1.51E-02 | 7.61E-14 | 5.35E-01 | 2.74E-11 |
| 588.49326 | 46.65  | 16.79 | 15.64 | 15.16 | 14.34 | 1.64E-13 | 4.54E-04 | 1.93E-07 | 1.27E-13 | 3.72E-01 | 1.64E-04 | 3.35E-02 |
| 588.5808  | 46.02  | 18.89 | 19.38 | 19.16 | 18.86 | 1.45E-01 | 1.91E-01 | 6.76E-01 | 1.00E+00 | 8.21E-01 | 2.00E-01 | 6.61E-01 |
| 588.68117 | 278.91 | 15.00 | 15.23 | 15.08 | 14.46 | 1.14E-01 | 8.75E-01 | 9.93E-01 | 3.31E-01 | 9.64E-01 | 8.99E-02 | 2.29E-01 |
| 588.72017 | 47.59  | 14.14 | 16.39 | 16.76 | 16.64 | 1.32E-19 | 9.41E-13 | 7.57E-14 | 9.09E-14 | 5.99E-01 | 8.47E-01 | 9.80E-01 |
| 588.75606 | 43.42  | 10.06 | 16.11 | 16.21 | 15.55 | 6.71E-42 | 3.65E-14 | 3.65E-14 | 3.65E-14 | 9.95E-01 | 5.74E-01 | 4.18E-01 |
| 588.80697 | 278.11 | 12.76 | 14.87 | 14.85 | 14.33 | 9.94E-06 | 5.64E-05 | 5.60E-05 | 6.45E-03 | 1.00E+00 | 6.93E-01 | 7.11E-01 |
| 588.80766 | 29.48  | 13.79 | 17.77 | 17.62 | 16.65 | 1.43E-21 | 7.52E-14 | 7.56E-14 | 2.69E-10 | 9.84E-01 | 4.68E-02 | 1.04E-01 |
| 588.85433 | 41.67  | 13.55 | 16.27 | 15.42 | 15.08 | 6.84E-21 | 6.36E-14 | 8.37E-12 | 6.85E-08 | 5.73E-03 | 6.56E-05 | 5.68E-01 |
| 588.93142 | 54.49  | 19.25 | 18.16 | 17.58 | 16.66 | 1.60E-07 | 5.17E-02 | 4.97E-04 | 5.14E-08 | 5.29E-01 | 4.89E-03 | 1.64E-01 |
| 588.93253 | 278.16 | 14.08 | 13.84 | 14.95 | 13.34 | 1.24E-01 | 9.83E-01 | 5.26E-01 | 6.83E-01 | 3.39E-01 | 8.86E-01 | 8.64E-02 |
| 588.99389 | 54.06  | 20.23 | 22.38 | 21.97 | 21.09 | 4.75E-17 | 7.38E-14 | 1.96E-11 | 2.95E-03 | 3.27E-01 | 3.73E-06 | 2.93E-03 |
| 589.30795 | 279.27 | 15.84 | 14.24 | 14.68 | 15.19 | 2.08E-06 | 1.27E-06 | 6.82E-04 | 1.54E-01 | 4.76E-01 | 1.51E-02 | 3.60E-01 |

|           |        |       |       |       |       |          |          |          |          |          |          |          |
|-----------|--------|-------|-------|-------|-------|----------|----------|----------|----------|----------|----------|----------|
| 589.49147 | 46.55  | 14.77 | 16.44 | 14.20 | 14.49 | 5.26E-05 | 3.75E-03 | 6.31E-01 | 9.39E-01 | 5.90E-05 | 1.01E-03 | 9.43E-01 |
| 589.60098 | 268.77 | 14.57 | 13.42 | 14.86 | 13.92 | 5.70E-04 | 8.74E-03 | 8.40E-01 | 3.00E-01 | 6.83E-04 | 5.53E-01 | 6.37E-02 |
| 589.80702 | 35.13  | 12.23 | 14.85 | 16.18 | 14.48 | 2.88E-13 | 6.88E-07 | 1.26E-13 | 4.59E-05 | 3.59E-02 | 8.82E-01 | 4.56E-03 |
| 589.92633 | 53.05  | 17.10 | 18.14 | 17.74 | 17.26 | 5.76E-04 | 6.37E-04 | 7.64E-02 | 9.41E-01 | 4.37E-01 | 9.47E-03 | 3.12E-01 |
| 589.98819 | 172.33 | 9.26  | 10.39 | 13.39 | 12.45 | 1.02E-08 | 3.53E-01 | 3.14E-08 | 5.43E-05 | 1.70E-04 | 2.50E-02 | 5.66E-01 |
| 590.0592  | 73.69  | 15.26 | 16.34 | 15.79 | 14.75 | 4.26E-04 | 1.65E-02 | 4.48E-01 | 5.32E-01 | 4.52E-01 | 2.99E-04 | 3.51E-02 |
| 590.11374 | 56.54  | 12.80 | 16.55 | 14.70 | 16.82 | 2.21E-14 | 1.91E-11 | 1.14E-03 | 2.60E-12 | 2.66E-03 | 9.58E-01 | 5.61E-04 |
| 590.3078  | 273.88 | 15.11 | 14.53 | 14.69 | 14.93 | 4.08E-01 | 3.80E-01 | 6.52E-01 | 9.65E-01 | 9.71E-01 | 7.18E-01 | 9.22E-01 |
| 590.41983 | 36.29  | 13.85 | 13.71 | 13.47 | 12.65 | 2.72E-01 | 9.96E-01 | 9.24E-01 | 2.39E-01 | 9.81E-01 | 3.75E-01 | 5.96E-01 |
| 590.49096 | 46.55  | 16.05 | 14.32 | 13.31 | 13.07 | 3.10E-16 | 7.20E-06 | 5.59E-13 | 1.08E-13 | 2.51E-02 | 3.99E-03 | 9.02E-01 |
| 590.57876 | 46.16  | 18.91 | 19.20 | 19.00 | 18.74 | 1.96E-01 | 4.68E-01 | 9.70E-01 | 8.54E-01 | 7.59E-01 | 1.42E-01 | 6.23E-01 |
| 590.66845 | 46.92  | 15.71 | 18.16 | 18.24 | 17.89 | 3.63E-27 | 6.41E-14 | 5.14E-14 | 7.54E-14 | 9.87E-01 | 6.79E-01 | 4.64E-01 |
| 590.80048 | 37.5   | 11.82 | 15.95 | 16.04 | 14.87 | 4.12E-25 | 6.85E-14 | 6.16E-14 | 4.92E-12 | 9.95E-01 | 4.78E-02 | 2.41E-02 |
| 590.97623 | 56.26  | 11.28 | 10.51 | 13.11 | 10.63 | 9.19E-04 | 6.77E-01 | 3.65E-02 | 7.94E-01 | 1.47E-03 | 9.98E-01 | 3.69E-03 |
| 590.98935 | 53.54  | 17.65 | 19.52 | 19.06 | 18.40 | 2.04E-16 | 7.43E-14 | 3.68E-10 | 2.57E-03 | 1.30E-01 | 4.29E-06 | 1.53E-02 |
| 591.1206  | 70.71  | 8.63  | 12.57 | 11.02 | 12.13 | 3.33E-10 | 1.27E-09 | 3.47E-04 | 1.60E-07 | 5.57E-02 | 8.97E-01 | 2.87E-01 |
| 591.30934 | 278.99 | 15.53 | 14.61 | 14.84 | 15.17 | 2.16E-02 | 1.71E-02 | 1.09E-01 | 6.71E-01 | 8.92E-01 | 3.20E-01 | 7.31E-01 |
| 591.49788 | 22.79  | 15.77 | 8.47  | 8.84  | 10.67 | 5.68E-26 | 5.32E-14 | 6.58E-14 | 4.04E-12 | 9.43E-01 | 8.69E-03 | 4.03E-02 |
| 591.79641 | 42.82  | 12.51 | 14.61 | 15.51 | 14.12 | 1.81E-14 | 4.20E-08 | 7.95E-14 | 6.57E-05 | 5.77E-02 | 5.44E-01 | 1.02E-03 |
| 591.92238 | 50.11  | 15.63 | 16.44 | 15.14 | 15.30 | 1.68E-03 | 8.52E-02 | 4.75E-01 | 7.78E-01 | 1.48E-03 | 9.60E-03 | 9.73E-01 |
| 591.967   | 54.2   | 12.93 | 12.78 | 13.32 | 10.84 | 1.39E-04 | 9.93E-01 | 8.85E-01 | 1.38E-03 | 7.68E-01 | 5.02E-03 | 1.30E-04 |
| 592.21022 | 39.62  | 16.13 | 18.99 | 16.23 | 18.12 | 8.88E-07 | 1.17E-05 | 9.99E-01 | 5.93E-03 | 3.93E-05 | 4.98E-01 | 1.22E-02 |
| 592.30697 | 279.3  | 15.85 | 15.40 | 15.33 | 15.54 | 3.58E-01 | 4.83E-01 | 3.41E-01 | 7.75E-01 | 9.96E-01 | 9.74E-01 | 9.17E-01 |
| 592.31797 | 280.75 | 15.61 | 14.75 | 14.90 | 14.80 | 5.29E-02 | 6.95E-02 | 1.79E-01 | 1.16E-01 | 9.72E-01 | 9.99E-01 | 9.93E-01 |
| 592.57639 | 46.26  | 18.00 | 18.12 | 17.88 | 17.79 | 3.78E-01 | 9.25E-01 | 9.04E-01 | 6.96E-01 | 5.86E-01 | 3.57E-01 | 9.74E-01 |
| 592.66684 | 47.16  | 16.66 | 18.73 | 18.82 | 18.50 | 1.38E-26 | 6.85E-14 | 5.32E-14 | 7.53E-14 | 9.70E-01 | 6.78E-01 | 4.00E-01 |
| 592.70825 | 281.55 | 16.27 | 14.99 | 14.54 | 14.76 | 6.39E-06 | 2.14E-03 | 1.11E-05 | 2.81E-04 | 6.20E-01 | 9.29E-01 | 9.42E-01 |
| 592.79035 | 50.27  | 12.33 | 16.19 | 15.66 | 14.54 | 3.47E-23 | 6.16E-14 | 7.38E-14 | 3.18E-08 | 4.51E-01 | 1.03E-04 | 1.66E-02 |
| 592.80825 | 273.78 | 13.14 | 16.10 | 15.92 | 15.18 | 8.39E-11 | 1.37E-09 | 9.06E-09 | 7.37E-05 | 9.80E-01 | 2.12E-01 | 3.90E-01 |
| 592.91476 | 39.17  | 12.06 | 14.18 | 13.43 | 12.99 | 1.73E-05 | 5.30E-06 | 6.21E-03 | 1.41E-01 | 3.01E-01 | 3.80E-02 | 7.44E-01 |
| 592.93144 | 276.99 | 15.51 | 17.92 | 17.66 | 16.82 | 2.34E-10 | 1.41E-09 | 5.43E-08 | 3.03E-03 | 8.94E-01 | 2.30E-02 | 1.24E-01 |
| 593.05913 | 273.94 | 15.42 | 16.30 | 16.14 | 15.81 | 2.64E-02 | 2.46E-02 | 8.61E-02 | 5.99E-01 | 9.61E-01 | 4.48E-01 | 7.39E-01 |
| 593.11226 | 83.23  | 10.22 | 14.65 | 14.20 | 13.76 | 2.25E-16 | 9.49E-14 | 2.76E-12 | 1.72E-09 | 8.39E-01 | 3.79E-01 | 8.52E-01 |
| 593.15727 | 288.04 | 16.52 | 13.93 | 14.31 | 14.68 | 2.18E-12 | 1.34E-11 | 5.24E-09 | 3.40E-06 | 7.11E-01 | 1.79E-01 | 7.44E-01 |
| 593.18425 | 273.55 | 15.94 | 15.82 | 15.92 | 15.17 | 1.74E-02 | 9.71E-01 | 1.00E+00 | 2.16E-02 | 9.85E-01 | 8.23E-02 | 3.20E-02 |
| 593.21364 | 39.62  | 12.60 | 15.70 | 12.06 | 14.76 | 2.52E-05 | 1.02E-03 | 9.10E-01 | 4.98E-02 | 1.14E-04 | 6.97E-01 | 9.63E-03 |
| 593.30475 | 263.07 | 15.60 | 16.32 | 17.73 | 17.40 | 5.48E-08 | 2.23E-01 | 1.92E-07 | 3.03E-05 | 1.70E-03 | 3.54E-02 | 8.35E-01 |
| 593.5137  | 22.91  | 16.08 | 7.42  | 7.50  | 9.22  | 3.71E-45 | 3.65E-14 | 3.65E-14 | 3.72E-14 | 9.99E-01 | 9.07E-03 | 1.32E-02 |
| 593.54251 | 56.16  | 12.65 | 16.01 | 14.65 | 16.82 | 5.12E-08 | 1.27E-05 | 2.03E-02 | 8.64E-08 | 2.17E-01 | 6.84E-01 | 1.56E-02 |
| 593.54935 | 252.04 | 10.48 | 15.54 | 17.66 | 15.72 | 9.34E-28 | 7.58E-14 | 3.67E-14 | 7.38E-14 | 1.91E-03 | 9.91E-01 | 7.07E-03 |
| 593.66704 | 49.43  | 13.86 | 14.68 | 14.75 | 14.72 | 7.06E-03 | 3.24E-02 | 1.51E-02 | 2.92E-02 | 9.96E-01 | 1.00E+00 | 9.99E-01 |
| 593.70559 | 265.57 | 16.17 | 16.64 | 19.36 | 17.51 | 3.36E-20 | 4.36E-01 | 7.25E-14 | 2.60E-04 | 9.71E-14 | 4.67E-02 | 3.35E-07 |
| 593.79988 | 254.22 | 15.12 | 14.62 | 17.39 | 16.88 | 4.86E-22 | 2.71E-01 | 1.58E-13 | 1.76E-08 | 7.56E-14 | 2.67E-12 | 3.03E-01 |
| 593.88397 | 54.96  | 18.00 | 15.16 | 13.57 | 14.40 | 1.56E-17 | 5.02E-08 | 7.49E-14 | 1.78E-11 | 7.24E-03 | 4.35E-01 | 3.52E-01 |
| 593.90588 | 273.14 | 15.93 | 17.74 | 20.22 | 18.47 | 3.16E-25 | 2.63E-06 | 3.72E-14 | 1.02E-10 | 2.32E-10 | 2.05E-01 | 1.68E-05 |
| 593.97661 | 53.17  | 14.73 | 17.39 | 17.83 | 15.57 | 4.56E-14 | 2.69E-09 | 3.33E-12 | 1.91E-01 | 7.24E-01 | 2.01E-04 | 1.82E-06 |
| 594.05382 | 268.04 | 14.89 | 18.48 | 18.71 | 17.33 | 4.93E-18 | 1.02E-13 | 7.43E-14 | 3.92E-07 | 9.53E-01 | 5.51E-02 | 1.22E-02 |
| 594.08481 | 245.76 | 9.56  | 14.05 | 13.35 | 12.76 | 2.63E-15 | 1.02E-13 | 5.86E-11 | 1.01E-07 | 5.74E-01 | 1.03E-01 | 7.14E-01 |
| 594.10678 | 266.24 | 16.44 | 17.39 | 20.10 | 18.07 | 2.10E-25 | 8.91E-03 | 3.74E-14 | 1.63E-06 | 7.77E-14 | 1.46E-01 | 4.73E-09 |
| 594.18392 | 277.03 | 16.18 | 19.54 | 19.67 | 18.40 | 1.68E-24 | 7.07E-14 | 6.36E-14 | 1.23E-09 | 9.81E-01 | 5.79E-03 | 1.43E-03 |
| 594.30821 | 274.91 | 16.58 | 20.33 | 21.01 | 19.48 | 3.84E-27 | 7.32E-14 | 3.76E-14 | 2.83E-12 | 2.66E-01 | 1.32E-01 | 5.47E-04 |
| 594.43398 | 279.63 | 15.71 | 20.08 | 20.11 | 18.85 | 2.32E-26 | 5.81E-14 | 5.34E-14 | 2.68E-12 | 1.00E+00 | 1.97E-02 | 1.48E-02 |
| 594.50743 | 246.79 | 14.42 | 14.78 | 17.58 | 15.59 | 9.56E-21 | 6.32E-01 | 7.23E-14 | 1.56E-03 | 7.58E-14 | 6.98E-02 | 2.28E-08 |
| 594.53392 | 51.45  | 16.72 | 17.68 | 17.32 | 17.39 | 1.07E-01 | 7.46E-02 | 4.31E-01 | 3.56E-01 | 8.01E-01 | 8.97E-01 | 9.98E-01 |
| 594.56038 | 279.12 | 16.16 | 19.08 | 19.28 | 18.04 | 2.21E-18 | 9.31E-14 | 7.52E-14 | 1.33E-06 | 9.35E-01 | 2.44E-02 | 3.72E-03 |
| 594.57569 | 46.51  | 12.14 | 15.09 | 13.32 | 14.21 | 2.43E-03 | 1.35E-03 | 4.32E-01 | 5.49E-02 | 1.30E-01 | 7.17E-01 | 7.09E-01 |
| 594.66533 | 47.31  | 15.87 | 18.05 | 18.15 | 17.88 | 2.60E-23 | 7.43E-14 | 7.45E-14 | 7.98E-14 | 9.75E-01 | 8.90E-01 | 6.68E-01 |
| 594.6848  | 279.9  | 15.68 | 18.09 | 18.05 | 16.70 | 2.26E-11 | 2.01E-09 | 2.89E-09 | 3.81E-02 | 9.99E-01 | 2.16E-03 | 2.96E-03 |
| 594.70824 | 248.25 | 11.46 | 12.94 | 15.08 | 13.13 | 6.28E-08 | 5.39E-02 | 7.15E-09 | 2.62E-02 | 1.88E-03 | 9.88E-01 | 7.75E-03 |
| 594.75556 | 46.05  | 14.07 | 16.81 | 16.65 | 16.85 | 5.90E-10 | 7.97E-08 | 3.46E-07 | 1.08E-07 | 9.88E-01 | 1.00E+00 | 9.76E-01 |
| 594.81055 | 276    | 15.79 | 16.41 | 16.37 | 16.11 | 1.14E-01 | 1.31E-01 | 1.71E-01 | 6.77E-01 | 9.99E-01 | 7.62E-01 | 8.33E-01 |
| 594.8769  | 52.16  | 16.97 | 17.03 | 17.18 | 16.78 | 5.67E-01 | 9.95E-01 | 8.53E-01 | 9.05E-01 | 9.50E-01 | 8.10E-01 | 4.88E-01 |
| 594.93592 | 277.06 | 15.60 | 16.03 | 15.78 | 15.59 | 5.44E-01 | 5.66E-01 | 9.44E-01 | 1.00E+00 | 8.87E-01 | 5.93E-01 | 9.44E-01 |
| 594.97493 | 53.28  | 14.28 | 15.56 | 16.36 | 13.89 | 2.97E-08 | 1.23E-02 | 5.69E-06 | 8.06E-01 | 2.45E-01 | 1.14E-03 | 3.16E-07 |
| 595.04541 | 55.4   | 11.43 | 14.90 | 11.69 | 14.43 | 2.00E-11 | 1.23E-08 | 9.66E-01 | 1.97E-06 | 2.92E-07 | 8.53E-01 | 2.66E-05 |
| 595.10504 | 186.83 | 8.12  | 14.75 | 15.03 | 11.82 | 2.94E-49 | 3.65E-14 | 3.65E-14 | 7.47E-14 | 8.97E-01 | 1.00E-10 | 1.18E-12 |
| 595.15377 | 76.58  | 12.80 | 14.75 | 10.95 | 13.89 | 9.10E-07 | 2.09E-02 | 2.94E-02 | 3.90E-01 | 5.35E-07 | 6.22E-01 | 2.48E-04 |
| 595.24209 | 32.42  | 14.35 | 16.92 | 16.84 | 17.75 | 5.74E-37 | 4.23E-14 | 4.79E-14 | 3.65E-14 | 9.84E-01 | 2.61E-03 | 6.38E-04 |

|           |        |       |       |       |       |          |          |          |          |          |          |          |
|-----------|--------|-------|-------|-------|-------|----------|----------|----------|----------|----------|----------|----------|
| 595.31366 | 278.5  | 15.55 | 14.93 | 14.81 | 14.98 | 1.29E-01 | 2.62E-01 | 1.24E-01 | 3.62E-01 | 9.86E-01 | 9.99E-01 | 9.62E-01 |
| 595.43613 | 52.51  | 13.68 | 13.15 | 11.17 | 13.50 | 2.32E-08 | 6.04E-01 | 6.74E-08 | 9.78E-01 | 5.61E-05 | 8.64E-01 | 2.62E-06 |
| 595.66344 | 49.64  | 8.87  | 14.68 | 14.43 | 13.44 | 6.50E-26 | 5.85E-14 | 6.63E-14 | 9.69E-14 | 9.68E-01 | 1.21E-01 | 2.78E-01 |
| 595.74743 | 49.56  | 11.65 | 12.11 | 11.88 | 12.58 | 3.27E-01 | 7.88E-01 | 9.65E-01 | 2.65E-01 | 9.69E-01 | 8.12E-01 | 5.41E-01 |
| 595.86969 | 51.06  | 17.27 | 19.41 | 19.50 | 18.39 | 2.76E-18 | 8.92E-14 | 7.47E-14 | 1.16E-04 | 9.83E-01 | 9.35E-04 | 2.05E-04 |
| 596.07102 | 64.28  | 15.30 | 15.72 | 17.48 | 15.62 | 5.91E-07 | 7.25E-01 | 7.53E-07 | 8.69E-01 | 1.73E-04 | 9.95E-01 | 9.72E-05 |
| 596.17059 | 301.43 | 15.82 | 18.29 | 18.59 | 17.01 | 9.86E-30 | 5.78E-14 | 3.70E-14 | 2.82E-06 | 5.51E-01 | 9.45E-07 | 7.72E-10 |
| 596.31053 | 280.68 | 15.46 | 14.61 | 14.95 | 14.89 | 7.20E-02 | 4.58E-02 | 3.85E-01 | 3.13E-01 | 7.38E-01 | 8.52E-01 | 9.98E-01 |
| 596.43449 | 52.25  | 11.65 | 12.59 | 10.35 | 12.97 | 1.94E-04 | 3.98E-01 | 1.33E-01 | 1.37E-01 | 1.92E-03 | 9.28E-01 | 2.57E-04 |
| 596.53513 | 51.5   | 16.53 | 19.35 | 18.98 | 17.79 | 2.41E-07 | 7.08E-07 | 1.70E-05 | 8.59E-02 | 8.97E-01 | 2.30E-02 | 1.22E-01 |
| 596.54635 | 54.4   | 14.20 | 18.80 | 18.18 | 17.90 | 4.19E-31 | 3.65E-14 | 5.12E-14 | 7.25E-14 | 3.37E-01 | 8.29E-02 | 8.69E-01 |
| 596.61269 | 46.5   | 17.05 | 18.75 | 18.51 | 17.99 | 1.17E-05 | 1.60E-05 | 2.66E-04 | 4.90E-02 | 9.04E-01 | 1.79E-01 | 5.09E-01 |
| 596.6648  | 47.27  | 13.73 | 15.85 | 16.00 | 16.06 | 1.57E-12 | 1.15E-08 | 6.11E-10 | 9.30E-10 | 9.69E-01 | 9.34E-01 | 9.99E-01 |
| 596.67107 | 302.29 | 14.55 | 16.65 | 17.03 | 15.68 | 1.11E-13 | 1.23E-09 | 7.36E-13 | 3.04E-03 | 6.55E-01 | 2.15E-02 | 4.12E-04 |
| 596.74717 | 47.82  | 15.19 | 17.80 | 17.98 | 18.16 | 2.57E-32 | 5.43E-14 | 3.87E-14 | 3.72E-14 | 8.66E-01 | 4.66E-01 | 8.92E-01 |
| 596.87819 | 47.63  | 16.09 | 17.90 | 17.95 | 18.25 | 8.13E-20 | 4.09E-13 | 1.17E-13 | 7.35E-14 | 9.95E-01 | 4.33E-01 | 5.75E-01 |
| 596.98202 | 70.93  | 15.74 | 19.39 | 18.87 | 17.98 | 2.33E-16 | 7.74E-14 | 4.47E-12 | 2.01E-06 | 6.14E-01 | 8.22E-03 | 1.74E-01 |
| 597.04707 | 54.28  | 14.41 | 16.52 | 15.67 | 15.94 | 1.82E-10 | 7.45E-11 | 1.55E-04 | 5.36E-06 | 2.59E-02 | 2.51E-01 | 8.09E-01 |
| 597.17341 | 302.81 | 14.33 | 14.79 | 15.23 | 14.46 | 6.02E-02 | 5.49E-01 | 5.00E-02 | 9.83E-01 | 6.20E-01 | 8.10E-01 | 1.63E-01 |
| 597.31157 | 275.75 | 16.31 | 15.60 | 15.66 | 16.23 | 1.10E-01 | 2.02E-01 | 2.63E-01 | 9.97E-01 | 9.99E-01 | 3.43E-01 | 4.22E-01 |
| 597.31637 | 108.8  | 8.26  | 17.27 | 16.06 | 16.27 | 1.68E-64 | 3.65E-14 | 3.65E-14 | 3.65E-14 | 1.97E-02 | 9.26E-02 | 9.60E-01 |
| 597.43989 | 279.4  | 15.76 | 14.81 | 14.80 | 14.94 | 1.40E-02 | 3.08E-02 | 2.62E-02 | 9.22E-02 | 1.00E+00 | 9.86E-01 | 9.81E-01 |
| 597.48142 | 52.46  | 13.37 | 16.77 | 15.58 | 15.39 | 6.19E-08 | 1.48E-08 | 3.64E-04 | 2.15E-03 | 1.48E-01 | 8.48E-02 | 9.88E-01 |
| 597.54465 | 54.24  | 13.38 | 17.32 | 16.24 | 16.18 | 1.16E-17 | 7.61E-14 | 1.86E-10 | 1.69E-09 | 5.74E-02 | 5.01E-02 | 9.99E-01 |
| 597.65185 | 107.78 | 9.95  | 15.21 | 14.44 | 14.48 | 6.98E-49 | 3.65E-14 | 3.65E-14 | 3.65E-14 | 5.41E-02 | 9.44E-02 | 9.99E-01 |
| 597.86844 | 49.48  | 16.71 | 19.08 | 19.20 | 18.54 | 1.38E-28 | 5.05E-14 | 3.90E-14 | 9.29E-14 | 9.48E-01 | 7.11E-02 | 1.58E-02 |
| 597.96593 | 253.71 | 11.86 | 16.35 | 12.55 | 15.13 | 1.02E-09 | 1.21E-08 | 7.65E-01 | 8.37E-05 | 3.17E-06 | 3.78E-01 | 4.12E-03 |
| 597.97916 | 53.19  | 15.74 | 17.59 | 17.26 | 16.26 | 3.17E-11 | 4.66E-10 | 2.45E-07 | 2.31E-01 | 6.42E-01 | 3.92E-05 | 3.07E-03 |
| 597.98602 | 112    | 12.35 | 13.00 | 12.97 | 12.69 | 2.20E-01 | 2.49E-01 | 2.83E-01 | 7.82E-01 | 1.00E+00 | 8.35E-01 | 8.71E-01 |
| 598.04497 | 57     | 11.47 | 13.24 | 11.73 | 12.43 | 1.14E-02 | 1.02E-02 | 9.68E-01 | 3.49E-01 | 4.51E-02 | 5.24E-01 | 6.34E-01 |
| 598.31134 | 281.33 | 16.28 | 14.79 | 14.77 | 15.35 | 7.27E-04 | 2.26E-03 | 1.56E-03 | 1.31E-01 | 1.00E+00 | 5.78E-01 | 5.30E-01 |
| 598.48204 | 46.11  | 13.95 | 12.43 | 11.27 | 12.29 | 2.37E-04 | 5.92E-02 | 6.75E-05 | 3.87E-02 | 2.40E-01 | 9.96E-01 | 3.75E-01 |
| 598.52686 | 48.99  | 16.78 | 16.32 | 16.36 | 16.00 | 8.42E-02 | 3.97E-01 | 4.72E-01 | 5.01E-02 | 9.99E-01 | 7.35E-01 | 6.50E-01 |
| 598.61033 | 46.11  | 18.36 | 19.67 | 19.48 | 19.09 | 2.54E-06 | 3.77E-06 | 8.87E-05 | 2.70E-02 | 8.86E-01 | 1.52E-01 | 4.87E-01 |
| 598.74133 | 49.3   | 15.92 | 17.03 | 17.14 | 17.06 | 9.67E-07 | 7.46E-05 | 7.74E-06 | 7.19E-05 | 9.69E-01 | 9.99E-01 | 9.89E-01 |
| 598.80343 | 279.68 | 16.02 | 14.48 | 14.72 | 15.17 | 2.94E-04 | 3.07E-04 | 2.99E-03 | 1.21E-01 | 9.23E-01 | 3.04E-01 | 6.61E-01 |
| 598.88009 | 43.39  | 10.84 | 14.04 | 13.78 | 15.26 | 8.36E-16 | 1.80E-09 | 2.36E-08 | 7.38E-14 | 9.56E-01 | 8.45E-02 | 2.14E-02 |
| 598.95853 | 52.9   | 18.51 | 18.01 | 18.83 | 17.49 | 4.40E-06 | 1.93E-01 | 5.69E-01 | 5.47E-04 | 8.58E-03 | 2.03E-01 | 4.24E-06 |
| 599.16542 | 304.8  | 13.64 | 15.29 | 14.73 | 15.25 | 1.50E-04 | 3.78E-04 | 3.58E-02 | 7.97E-04 | 5.32E-01 | 1.00E+00 | 6.08E-01 |
| 599.31383 | 279.68 | 16.88 | 15.17 | 15.29 | 15.72 | 9.54E-05 | 2.11E-04 | 5.87E-04 | 2.95E-02 | 9.92E-01 | 5.75E-01 | 7.43E-01 |
| 599.439   | 28.29  | 17.42 | 18.90 | 18.13 | 17.59 | 1.49E-05 | 1.51E-05 | 8.93E-02 | 9.50E-01 | 7.28E-02 | 4.26E-04 | 3.29E-01 |
| 599.50336 | 24     | 16.44 | 11.25 | 12.53 | 14.01 | 3.10E-20 | 7.21E-14 | 9.53E-13 | 2.45E-05 | 6.15E-02 | 2.44E-06 | 2.68E-02 |
| 599.66721 | 306.51 | 14.62 | 13.36 | 13.05 | 13.63 | 1.00E-05 | 5.61E-04 | 7.84E-06 | 1.45E-02 | 7.86E-01 | 8.48E-01 | 3.10E-01 |
| 599.73121 | 44.41  | 13.65 | 12.02 | 11.94 | 12.72 | 7.67E-05 | 4.78E-04 | 1.88E-04 | 1.19E-01 | 9.98E-01 | 3.64E-01 | 2.63E-01 |
| 599.82971 | 51.54  | 14.39 | 10.90 | 13.52 | 11.94 | 1.88E-08 | 3.43E-08 | 4.21E-01 | 2.73E-04 | 8.37E-05 | 3.26E-01 | 4.66E-02 |
| 599.86405 | 50.7   | 14.15 | 17.08 | 16.95 | 15.69 | 3.56E-31 | 3.67E-14 | 3.81E-14 | 4.09E-09 | 9.49E-01 | 2.96E-07 | 3.12E-06 |
| 599.9003  | 36.24  | 12.57 | 15.22 | 10.33 | 15.28 | 9.76E-20 | 4.84E-06 | 1.33E-04 | 5.25E-06 | 7.45E-14 | 1.00E+00 | 7.43E-14 |
| 599.91091 | 268.11 | 15.68 | 14.91 | 15.37 | 14.92 | 8.31E-02 | 1.17E-01 | 7.99E-01 | 1.42E-01 | 5.62E-01 | 1.00E+00 | 6.03E-01 |
| 599.95278 | 57.31  | 19.21 | 19.52 | 18.51 | 17.90 | 2.25E-06 | 7.33E-01 | 9.24E-02 | 1.79E-04 | 6.87E-03 | 4.39E-06 | 2.09E-01 |
| 599.98482 | 53.61  | 16.37 | 18.81 | 17.49 | 17.08 | 4.98E-10 | 8.62E-11 | 5.99E-03 | 1.87E-01 | 1.25E-03 | 1.89E-05 | 6.56E-01 |
| 600.07213 | 163.62 | 6.63  | 11.06 | 10.91 | 9.82  | 2.92E-17 | 8.29E-14 | 1.07E-13 | 3.74E-08 | 9.93E-01 | 1.10E-01 | 1.84E-01 |
| 600.11286 | 265.24 | 16.70 | 15.42 | 15.99 | 15.80 | 8.68E-03 | 4.50E-03 | 2.33E-01 | 9.76E-02 | 4.50E-01 | 7.72E-01 | 9.64E-01 |
| 600.15728 | 285.29 | 16.23 | 14.87 | 13.85 | 15.06 | 1.69E-03 | 1.12E-01 | 5.16E-04 | 2.36E-01 | 3.48E-01 | 9.91E-01 | 2.23E-01 |
| 600.19683 | 281.67 | 16.24 | 15.16 | 14.08 | 15.34 | 4.31E-03 | 2.58E-01 | 1.44E-03 | 4.43E-01 | 2.76E-01 | 9.92E-01 | 1.74E-01 |
| 600.23756 | 283.08 | 15.92 | 14.84 | 13.16 | 15.16 | 2.70E-04 | 3.18E-01 | 9.24E-05 | 6.39E-01 | 4.92E-02 | 9.64E-01 | 1.53E-02 |
| 600.31361 | 266.88 | 16.72 | 15.46 | 15.74 | 15.97 | 6.80E-03 | 4.79E-03 | 4.30E-02 | 2.02E-01 | 8.82E-01 | 5.79E-01 | 9.41E-01 |
| 600.32403 | 55.45  | 11.01 | 13.38 | 13.34 | 12.83 | 4.06E-06 | 2.58E-05 | 3.17E-05 | 2.91E-03 | 1.00E+00 | 7.29E-01 | 7.73E-01 |
| 600.40063 | 25.27  | 10.10 | 15.05 | 9.44  | 15.79 | 3.41E-21 | 7.34E-11 | 7.74E-01 | 4.56E-13 | 8.10E-13 | 7.42E-01 | 7.75E-14 |
| 600.44254 | 29.25  | 15.17 | 14.24 | 13.19 | 13.69 | 1.48E-05 | 9.61E-02 | 7.23E-06 | 2.29E-03 | 5.39E-02 | 5.73E-01 | 6.28E-01 |
| 600.4805  | 49.66  | 14.70 | 16.22 | 13.99 | 14.37 | 1.46E-03 | 4.17E-02 | 5.97E-01 | 9.41E-01 | 1.06E-03 | 1.31E-02 | 9.25E-01 |
| 600.51368 | 266.96 | 9.97  | 13.72 | 14.95 | 12.47 | 1.29E-10 | 1.45E-06 | 7.44E-11 | 3.59E-03 | 3.18E-01 | 3.38E-01 | 4.97E-03 |
| 600.52223 | 44.2   | 15.24 | 13.38 | 12.74 | 13.90 | 1.73E-06 | 4.50E-04 | 8.03E-07 | 2.59E-02 | 5.39E-01 | 7.15E-01 | 8.52E-02 |
| 600.60781 | 46.19  | 18.10 | 19.27 | 19.11 | 18.85 | 2.26E-07 | 4.44E-07 | 1.42E-05 | 3.50E-03 | 8.76E-01 | 2.32E-01 | 6.40E-01 |
| 600.65754 | 46.36  | 9.52  | 11.05 | 12.52 | 10.18 | 5.18E-08 | 1.16E-02 | 2.42E-08 | 5.63E-01 | 2.13E-02 | 3.43E-01 | 6.20E-05 |
| 600.69834 | 46.92  | 15.49 | 17.83 | 18.04 | 17.85 | 1.06E-16 | 5.64E-12 | 1.29E-13 | 1.28E-11 | 9.14E-01 | 1.00E+00 | 9.38E-01 |
| 600.73289 | 49.72  | 14.88 | 15.49 | 15.15 | 13.60 | 1.24E-03 | 5.52E-01 | 9.32E-01 | 3.74E-02 | 8.95E-01 | 8.52E-04 | 8.40E-03 |
| 600.80813 | 279.39 | 15.43 | 14.29 | 14.54 | 14.64 | 1.28E-02 | 1.04E-02 | 6.39E-02 | 1.46E-01 | 9.15E-01 | 8.07E-01 | 9.93E-01 |
| 600.82255 | 51.19  | 15.01 | 15.83 | 15.89 | 14.60 | 2.94E-04 | 6.84E-02 | 3.89E-02 | 6.09E-01 | 9.98E-01 | 2.93E-03 | 1.36E-03 |

|           |        |       |       |       |       |          |          |          |          |          |          |          |
|-----------|--------|-------|-------|-------|-------|----------|----------|----------|----------|----------|----------|----------|
| 600.95549 | 51.09  | 17.79 | 16.64 | 17.65 | 15.47 | 5.94E-13 | 9.60E-04 | 9.62E-01 | 7.27E-12 | 6.87E-03 | 1.58E-03 | 3.05E-10 |
| 600.98311 | 53.88  | 13.50 | 17.10 | 13.86 | 14.84 | 9.23E-10 | 1.85E-09 | 9.15E-01 | 8.27E-02 | 1.30E-07 | 6.91E-04 | 3.17E-01 |
| 601.05589 | 190.42 | 6.88  | 14.15 | 14.60 | 12.94 | 8.45E-52 | 3.65E-14 | 3.65E-14 | 3.65E-14 | 7.20E-01 | 3.55E-02 | 1.21E-03 |
| 601.1115  | 289.14 | 14.73 | 16.64 | 17.62 | 16.46 | 3.96E-10 | 3.09E-05 | 8.09E-11 | 3.08E-04 | 9.13E-02 | 9.76E-01 | 3.68E-02 |
| 601.30854 | 278.63 | 15.57 | 14.10 | 14.79 | 15.07 | 2.08E-05 | 5.19E-06 | 3.44E-02 | 3.28E-01 | 1.01E-01 | 1.04E-02 | 7.96E-01 |
| 601.31798 | 277.65 | 16.20 | 14.42 | 14.74 | 15.15 | 1.14E-08 | 1.60E-08 | 3.50E-06 | 2.65E-03 | 7.01E-01 | 7.63E-02 | 5.10E-01 |
| 601.52201 | 40.97  | 16.26 | 10.27 | 10.92 | 13.50 | 1.28E-12 | 2.04E-11 | 1.48E-09 | 5.96E-03 | 8.64E-01 | 1.28E-03 | 1.47E-02 |
| 601.95589 | 54     | 15.66 | 14.83 | 15.90 | 12.76 | 2.72E-06 | 4.95E-01 | 9.78E-01 | 1.89E-05 | 2.94E-01 | 6.11E-03 | 5.48E-06 |
| 602.08408 | 62.75  | 16.54 | 16.73 | 17.20 | 15.81 | 2.47E-04 | 9.21E-01 | 1.15E-01 | 7.65E-02 | 4.08E-01 | 1.88E-02 | 7.00E-05 |
| 602.11535 | 281.86 | 15.45 | 18.46 | 18.86 | 17.89 | 6.51E-21 | 7.53E-14 | 7.47E-14 | 1.92E-10 | 6.66E-01 | 3.92E-01 | 3.67E-02 |
| 602.12643 | 281.24 | 14.84 | 14.33 | 11.62 | 12.76 | 1.49E-05 | 8.81E-01 | 2.40E-05 | 1.88E-02 | 8.82E-04 | 1.40E-01 | 3.89E-01 |
| 602.31434 | 278.66 | 15.55 | 14.87 | 14.75 | 15.14 | 1.63E-01 | 2.83E-01 | 1.52E-01 | 7.28E-01 | 9.91E-01 | 9.04E-01 | 7.61E-01 |
| 602.47    | 46.02  | 16.71 | 14.55 | 14.95 | 12.70 | 6.41E-13 | 3.93E-05 | 1.06E-03 | 1.25E-13 | 8.41E-01 | 1.40E-03 | 4.86E-05 |
| 602.5232  | 42.75  | 16.16 | 10.20 | 10.19 | 12.83 | 2.27E-27 | 5.10E-14 | 4.72E-14 | 2.00E-08 | 1.00E+00 | 2.67E-05 | 2.01E-05 |
| 602.56498 | 50.6   | 14.75 | 14.78 | 14.37 | 13.41 | 1.18E-02 | 1.00E+00 | 8.13E-01 | 1.60E-02 | 7.92E-01 | 1.73E-02 | 1.58E-01 |
| 602.5651  | 277.1  | 11.08 | 14.16 | 14.25 | 12.78 | 4.34E-07 | 6.75E-06 | 2.60E-06 | 3.85E-02 | 9.99E-01 | 1.49E-01 | 1.04E-01 |
| 602.60625 | 46.39  | 16.29 | 17.92 | 17.66 | 17.30 | 9.62E-07 | 1.36E-06 | 5.23E-05 | 7.51E-03 | 8.47E-01 | 2.29E-01 | 6.74E-01 |
| 602.68603 | 278.64 | 12.41 | 14.11 | 14.58 | 13.97 | 1.56E-05 | 1.19E-03 | 1.27E-05 | 4.77E-03 | 7.34E-01 | 9.92E-01 | 5.69E-01 |
| 602.69613 | 47.12  | 16.22 | 18.45 | 18.56 | 18.27 | 1.37E-24 | 7.46E-14 | 7.03E-14 | 7.46E-14 | 9.64E-01 | 8.65E-01 | 5.95E-01 |
| 602.81408 | 277.93 | 14.64 | 14.64 | 14.80 | 14.18 | 4.12E-01 | 1.00E+00 | 9.69E-01 | 5.97E-01 | 9.71E-01 | 6.24E-01 | 3.55E-01 |
| 602.82485 | 25.6   | 14.13 | 16.59 | 17.27 | 14.86 | 9.42E-14 | 5.09E-08 | 2.19E-12 | 3.04E-01 | 3.59E-01 | 5.68E-04 | 3.81E-07 |
| 602.93868 | 278.98 | 15.83 | 16.00 | 15.48 | 15.65 | 4.06E-01 | 9.53E-01 | 6.57E-01 | 9.37E-01 | 3.64E-01 | 7.13E-01 | 9.55E-01 |
| 603.06135 | 279.11 | 13.86 | 16.84 | 16.08 | 15.20 | 2.70E-10 | 2.05E-10 | 2.12E-06 | 1.34E-02 | 3.08E-01 | 1.99E-03 | 2.04E-01 |
| 603.11904 | 297.4  | 11.18 | 14.65 | 14.67 | 14.07 | 1.87E-12 | 3.68E-10 | 1.98E-10 | 4.13E-07 | 1.00E+00 | 6.99E-01 | 6.70E-01 |
| 603.15293 | 137.11 | 12.86 | 17.22 | 17.53 | 15.12 | 1.58E-33 | 3.72E-14 | 3.65E-14 | 1.05E-08 | 8.27E-01 | 2.70E-07 | 2.38E-09 |
| 603.18534 | 278.71 | 14.98 | 16.21 | 15.73 | 15.62 | 1.42E-03 | 4.83E-04 | 6.62E-02 | 1.78E-01 | 4.29E-01 | 2.71E-01 | 9.86E-01 |
| 603.31074 | 277.71 | 15.63 | 14.27 | 14.71 | 15.30 | 1.28E-04 | 1.17E-04 | 1.76E-02 | 7.26E-01 | 5.07E-01 | 1.14E-02 | 2.86E-01 |
| 603.42354 | 49.57  | 14.28 | 15.61 | 14.57 | 14.39 | 5.22E-03 | 5.14E-03 | 8.77E-01 | 9.92E-01 | 5.49E-02 | 2.19E-02 | 9.74E-01 |
| 603.43402 | 279.13 | 15.17 | 14.87 | 14.58 | 14.67 | 3.69E-01 | 8.36E-01 | 3.42E-01 | 5.30E-01 | 8.56E-01 | 9.54E-01 | 9.94E-01 |
| 603.46252 | 280.2  | 14.41 | 15.28 | 14.71 | 14.59 | 2.54E-01 | 2.01E-01 | 8.98E-01 | 9.77E-01 | 5.94E-01 | 4.59E-01 | 9.94E-01 |
| 603.53456 | 22.96  | 14.78 | 5.49  | 5.74  | 8.22  | 1.06E-43 | 3.65E-14 | 3.65E-14 | 5.78E-14 | 9.75E-01 | 8.31E-05 | 3.80E-04 |
| 603.69598 | 49.16  | 8.98  | 14.02 | 14.00 | 13.57 | 1.09E-33 | 3.67E-14 | 3.67E-14 | 5.32E-14 | 1.00E+00 | 6.97E-01 | 7.29E-01 |
| 603.6988  | 274.67 | 15.64 | 14.28 | 14.60 | 14.66 | 7.77E-05 | 6.30E-05 | 3.34E-03 | 9.49E-03 | 7.31E-01 | 6.36E-01 | 9.98E-01 |
| 603.82456 | 273.12 | 15.85 | 14.31 | 14.60 | 14.52 | 9.35E-07 | 2.84E-06 | 1.96E-04 | 1.15E-04 | 7.66E-01 | 9.07E-01 | 9.93E-01 |
| 603.95131 | 272.37 | 15.21 | 14.67 | 14.81 | 14.85 | 4.72E-01 | 4.23E-01 | 6.64E-01 | 7.61E-01 | 9.80E-01 | 9.61E-01 | 9.99E-01 |
| 604.15501 | 140.27 | 7.30  | 10.84 | 11.39 | 9.20  | 3.98E-14 | 3.47E-10 | 4.50E-13 | 2.30E-03 | 7.33E-01 | 1.46E-02 | 4.00E-04 |
| 604.30991 | 278.74 | 16.07 | 14.71 | 14.81 | 15.57 | 1.04E-04 | 3.67E-04 | 9.40E-04 | 4.52E-01 | 9.93E-01 | 7.67E-02 | 1.34E-01 |
| 604.42307 | 49.48  | 12.28 | 15.20 | 14.52 | 14.02 | 4.54E-06 | 2.90E-06 | 4.57E-04 | 1.51E-02 | 6.45E-01 | 2.01E-01 | 8.32E-01 |
| 604.43396 | 278.89 | 15.79 | 14.45 | 14.64 | 14.60 | 1.45E-04 | 3.59E-04 | 2.82E-03 | 2.93E-03 | 9.40E-01 | 9.70E-01 | 1.00E+00 |
| 604.46775 | 46.05  | 16.40 | 13.27 | 13.61 | 13.30 | 4.06E-15 | 3.13E-12 | 2.86E-10 | 1.47E-11 | 8.53E-01 | 1.00E+00 | 8.86E-01 |
| 604.47495 | 268.47 | 14.89 | 14.27 | 15.13 | 14.51 | 3.97E-01 | 6.41E-01 | 9.67E-01 | 8.95E-01 | 3.81E-01 | 9.73E-01 | 6.73E-01 |
| 604.53253 | 55.28  | 13.71 | 16.26 | 15.88 | 16.09 | 2.70E-06 | 1.52E-05 | 2.92E-04 | 1.04E-04 | 8.91E-01 | 9.90E-01 | 9.80E-01 |
| 604.55467 | 274.78 | 14.65 | 14.73 | 15.09 | 15.23 | 5.31E-01 | 9.97E-01 | 7.45E-01 | 5.72E-01 | 8.63E-01 | 7.14E-01 | 9.90E-01 |
| 604.56122 | 47.79  | 16.53 | 17.72 | 17.63 | 16.34 | 8.69E-04 | 2.01E-02 | 3.41E-02 | 9.69E-01 | 9.97E-01 | 8.66E-03 | 1.49E-02 |
| 604.60891 | 46.52  | 14.19 | 14.46 | 14.18 | 14.52 | 7.18E-01 | 8.77E-01 | 1.00E+00 | 8.03E-01 | 8.78E-01 | 9.98E-01 | 8.06E-01 |
| 604.68785 | 276.36 | 14.05 | 15.16 | 14.78 | 14.85 | 1.76E-02 | 1.12E-02 | 1.66E-01 | 1.34E-01 | 7.27E-01 | 8.38E-01 | 9.98E-01 |
| 604.695   | 47.47  | 14.23 | 17.43 | 17.51 | 17.77 | 2.38E-34 | 3.90E-14 | 3.72E-14 | 3.67E-14 | 9.92E-01 | 6.47E-01 | 8.06E-01 |
| 604.74486 | 266.03 | 15.42 | 13.85 | 14.37 | 14.47 | 1.22E-05 | 4.10E-06 | 3.55E-03 | 1.48E-02 | 3.58E-01 | 2.32E-01 | 9.89E-01 |
| 604.81029 | 278.32 | 15.14 | 14.92 | 14.63 | 14.92 | 5.60E-01 | 9.26E-01 | 4.69E-01 | 9.33E-01 | 8.55E-01 | 1.00E+00 | 8.61E-01 |
| 604.90581 | 57.15  | 18.79 | 17.68 | 16.93 | 14.94 | 1.17E-10 | 1.35E-01 | 1.64E-03 | 2.15E-11 | 4.73E-01 | 4.64E-06 | 1.43E-03 |
| 604.9677  | 52.42  | 19.93 | 21.50 | 21.73 | 20.35 | 6.03E-17 | 3.64E-11 | 1.06E-13 | 2.24E-01 | 7.30E-01 | 6.59E-06 | 3.45E-08 |
| 605.03379 | 55.29  | 10.15 | 12.36 | 11.53 | 13.23 | 8.60E-06 | 1.30E-03 | 8.87E-02 | 5.03E-06 | 5.15E-01 | 5.16E-01 | 3.42E-02 |
| 605.06086 | 277.87 | 14.26 | 14.90 | 14.67 | 15.05 | 1.17E-01 | 2.38E-01 | 6.23E-01 | 1.06E-01 | 9.07E-01 | 9.73E-01 | 6.95E-01 |
| 605.1398  | 58.24  | 11.10 | 16.34 | 15.51 | 16.38 | 3.00E-28 | 4.76E-14 | 7.36E-14 | 5.36E-14 | 2.95E-01 | 1.00E+00 | 2.71E-01 |
| 605.17714 | 271.38 | 9.83  | 15.10 | 15.53 | 14.19 | 4.53E-22 | 7.46E-14 | 7.38E-14 | 6.83E-12 | 8.75E-01 | 4.28E-01 | 1.09E-01 |
| 605.19304 | 281.7  | 13.89 | 14.17 | 14.63 | 14.36 | 1.88E-01 | 8.55E-01 | 1.39E-01 | 5.39E-01 | 5.60E-01 | 9.48E-01 | 8.87E-01 |
| 605.31534 | 278.6  | 15.58 | 16.58 | 16.15 | 16.12 | 1.07E-01 | 6.28E-02 | 4.88E-01 | 5.53E-01 | 7.11E-01 | 7.00E-01 | 1.00E+00 |
| 605.32421 | 61.1   | 11.19 | 12.53 | 12.81 | 12.63 | 1.94E-03 | 2.16E-02 | 3.01E-03 | 1.50E-02 | 9.41E-01 | 9.97E-01 | 9.84E-01 |
| 605.4604  | 278.23 | 14.39 | 14.34 | 15.07 | 14.49 | 1.68E-01 | 9.99E-01 | 2.23E-01 | 9.94E-01 | 1.89E-01 | 9.79E-01 | 4.05E-01 |
| 605.53088 | 55.59  | 11.76 | 15.28 | 14.94 | 14.91 | 3.05E-08 | 4.02E-07 | 4.61E-06 | 1.25E-05 | 9.50E-01 | 9.45E-01 | 1.00E+00 |
| 605.56352 | 281.67 | 14.95 | 14.28 | 14.70 | 14.86 | 3.84E-01 | 3.45E-01 | 9.20E-01 | 9.97E-01 | 7.44E-01 | 5.21E-01 | 9.79E-01 |
| 605.60362 | 277.53 | 15.38 | 14.62 | 15.04 | 14.57 | 7.03E-02 | 1.21E-01 | 7.34E-01 | 9.71E-02 | 6.42E-01 | 9.99E-01 | 5.65E-01 |
| 605.69289 | 49.24  | 10.88 | 12.81 | 13.15 | 12.77 | 5.44E-11 | 1.57E-07 | 4.83E-10 | 5.93E-07 | 7.66E-01 | 1.00E+00 | 7.15E-01 |
| 605.69863 | 286.43 | 14.42 | 14.84 | 15.13 | 14.71 | 1.06E-01 | 4.62E-01 | 6.50E-02 | 7.61E-01 | 7.63E-01 | 9.73E-01 | 5.09E-01 |
| 605.7483  | 277.17 | 15.71 | 14.78 | 14.80 | 14.26 | 4.04E-04 | 2.91E-02 | 3.09E-02 | 1.77E-04 | 1.00E+00 | 4.43E-01 | 4.08E-01 |
| 605.89193 | 270.85 | 14.95 | 14.41 | 14.93 | 14.91 | 3.94E-01 | 4.27E-01 | 1.00E+00 | 1.00E+00 | 4.78E-01 | 5.42E-01 | 1.00E+00 |
| 605.89812 | 48.04  | 16.54 | 17.66 | 17.98 | 16.52 | 5.78E-05 | 1.47E-02 | 6.70E-04 | 1.00E+00 | 8.35E-01 | 2.03E-02 | 1.24E-03 |
| 605.96829 | 52.98  | 16.37 | 18.21 | 18.52 | 16.91 | 6.12E-15 | 1.02E-09 | 8.03E-13 | 2.24E-01 | 6.84E-01 | 7.36E-05 | 3.99E-07 |

|           |        |       |       |       |       |          |          |          |          |          |          |          |
|-----------|--------|-------|-------|-------|-------|----------|----------|----------|----------|----------|----------|----------|
| 606.03346 | 73.41  | 11.49 | 14.99 | 14.23 | 13.54 | 1.77E-09 | 1.62E-09 | 2.32E-06 | 1.14E-03 | 4.99E-01 | 5.07E-02 | 6.04E-01 |
| 606.0618  | 278.62 | 15.66 | 14.85 | 14.68 | 15.05 | 2.67E-03 | 1.86E-02 | 2.16E-03 | 1.33E-01 | 9.28E-01 | 9.08E-01 | 5.80E-01 |
| 606.15732 | 281.74 | 10.01 | 15.16 | 13.83 | 14.53 | 4.57E-18 | 7.47E-14 | 3.43E-10 | 9.91E-13 | 9.55E-02 | 7.12E-01 | 6.30E-01 |
| 606.17689 | 157.06 | 5.96  | 11.26 | 11.31 | 9.18  | 4.31E-27 | 5.32E-14 | 4.74E-14 | 1.39E-09 | 9.99E-01 | 2.80E-04 | 1.56E-04 |
| 606.1817  | 279.15 | 14.12 | 14.18 | 14.28 | 13.98 | 7.31E-01 | 9.96E-01 | 9.18E-01 | 9.52E-01 | 9.79E-01 | 8.83E-01 | 6.74E-01 |
| 606.29697 | 34.34  | 14.38 | 16.79 | 17.07 | 16.92 | 5.66E-15 | 2.73E-10 | 1.35E-12 | 8.60E-11 | 8.55E-01 | 9.83E-01 | 9.76E-01 |
| 606.31353 | 278.51 | 15.97 | 16.17 | 15.66 | 16.10 | 5.04E-01 | 9.44E-01 | 7.98E-01 | 9.83E-01 | 4.83E-01 | 9.98E-01 | 6.17E-01 |
| 606.43526 | 278.97 | 15.48 | 14.72 | 14.90 | 14.56 | 1.07E-02 | 4.07E-02 | 1.78E-01 | 1.08E-02 | 9.21E-01 | 9.56E-01 | 6.69E-01 |
| 606.46609 | 39.01  | 15.81 | 13.61 | 13.76 | 14.08 | 6.29E-08 | 5.12E-07 | 2.51E-06 | 1.86E-04 | 9.83E-01 | 6.81E-01 | 8.68E-01 |
| 606.55919 | 47.42  | 17.41 | 17.93 | 17.89 | 17.22 | 5.30E-03 | 9.77E-02 | 1.47E-01 | 8.49E-01 | 9.97E-01 | 1.72E-02 | 2.82E-02 |
| 606.56193 | 277.66 | 13.57 | 14.45 | 14.90 | 14.52 | 1.81E-02 | 1.78E-01 | 1.09E-02 | 1.42E-01 | 7.32E-01 | 9.99E-01 | 8.32E-01 |
| 606.64234 | 46.2   | 16.62 | 18.88 | 18.71 | 18.39 | 7.80E-17 | 8.60E-14 | 5.23E-13 | 2.53E-09 | 9.20E-01 | 2.99E-01 | 6.62E-01 |
| 606.68806 | 278.55 | 15.17 | 15.61 | 15.07 | 14.63 | 2.54E-02 | 4.60E-01 | 9.84E-01 | 2.90E-01 | 2.87E-01 | 1.16E-02 | 5.04E-01 |
| 606.69633 | 48.45  | 11.65 | 13.87 | 13.74 | 14.14 | 1.78E-08 | 2.87E-06 | 1.00E-05 | 2.70E-07 | 9.90E-01 | 9.34E-01 | 8.06E-01 |
| 606.78213 | 43.7   | 11.00 | 14.04 | 14.23 | 14.50 | 1.38E-09 | 1.58E-06 | 2.43E-07 | 6.29E-08 | 9.89E-01 | 8.77E-01 | 9.70E-01 |
| 606.81473 | 277.63 | 14.25 | 16.30 | 15.38 | 14.97 | 1.04E-06 | 2.22E-07 | 9.25E-03 | 2.03E-01 | 6.26E-02 | 3.37E-03 | 7.08E-01 |
| 606.9023  | 48.55  | 15.47 | 13.14 | 11.60 | 10.93 | 2.81E-11 | 1.69E-03 | 1.86E-08 | 1.94E-10 | 8.26E-02 | 6.08E-03 | 7.47E-01 |
| 606.9397  | 277.85 | 16.00 | 16.67 | 16.03 | 15.86 | 8.94E-02 | 1.78E-01 | 1.00E+00 | 9.71E-01 | 2.31E-01 | 9.02E-02 | 9.55E-01 |
| 606.96134 | 51.14  | 17.76 | 19.14 | 19.36 | 17.92 | 8.80E-11 | 2.01E-06 | 2.00E-08 | 9.35E-01 | 8.43E-01 | 1.00E-04 | 2.26E-06 |
| 607.06514 | 277.78 | 15.69 | 15.73 | 15.58 | 15.56 | 9.36E-01 | 1.00E+00 | 9.82E-01 | 9.70E-01 | 9.65E-01 | 9.50E-01 | 1.00E+00 |
| 607.16049 | 188.38 | 9.36  | 13.26 | 14.04 | 12.08 | 3.73E-25 | 7.45E-14 | 4.32E-14 | 2.30E-09 | 2.43E-01 | 3.20E-02 | 4.11E-05 |
| 607.18984 | 277.96 | 14.73 | 15.28 | 15.54 | 15.32 | 7.54E-02 | 3.17E-01 | 5.46E-02 | 2.75E-01 | 8.57E-01 | 9.99E-01 | 9.16E-01 |
| 607.31565 | 276.78 | 15.22 | 15.28 | 15.18 | 15.28 | 9.93E-01 | 9.99E-01 | 1.00E+00 | 9.99E-01 | 9.94E-01 | 1.00E+00 | 9.95E-01 |
| 607.53669 | 53.78  | 15.37 | 18.76 | 18.29 | 17.58 | 3.31E-25 | 4.67E-14 | 7.41E-14 | 3.04E-11 | 4.09E-01 | 1.29E-03 | 1.09E-01 |
| 607.68762 | 277.29 | 14.47 | 14.62 | 14.65 | 14.54 | 9.37E-01 | 9.60E-01 | 9.36E-01 | 9.96E-01 | 1.00E+00 | 9.95E-01 | 9.88E-01 |
| 607.77393 | 49.51  | 11.35 | 12.82 | 12.77 | 12.08 | 3.89E-02 | 5.59E-02 | 6.50E-02 | 6.05E-01 | 1.00E+00 | 6.24E-01 | 6.67E-01 |
| 607.81152 | 279.03 | 15.49 | 15.51 | 15.32 | 15.23 | 8.31E-01 | 1.00E+00 | 9.57E-01 | 8.78E-01 | 9.45E-01 | 8.60E-01 | 9.94E-01 |
| 607.89403 | 271.17 | 13.22 | 15.17 | 15.31 | 15.33 | 3.76E-06 | 2.01E-04 | 4.61E-05 | 7.99E-05 | 9.91E-01 | 9.89E-01 | 1.00E+00 |
| 607.89501 | 52.22  | 15.10 | 16.40 | 16.24 | 15.12 | 5.52E-04 | 5.32E-03 | 1.83E-02 | 1.00E+00 | 9.76E-01 | 1.09E-02 | 3.28E-02 |
| 607.93764 | 277.37 | 14.77 | 14.66 | 14.98 | 14.55 | 3.63E-01 | 9.69E-01 | 8.00E-01 | 8.16E-01 | 5.50E-01 | 9.74E-01 | 3.17E-01 |
| 607.97101 | 53.22  | 16.20 | 19.12 | 18.61 | 17.12 | 1.79E-10 | 1.57E-09 | 5.54E-07 | 1.78E-01 | 6.75E-01 | 1.62E-04 | 7.97E-03 |
| 608.03804 | 53.63  | 10.71 | 16.09 | 15.12 | 14.29 | 1.06E-18 | 7.39E-14 | 5.25E-13 | 1.21E-08 | 3.27E-01 | 1.35E-02 | 4.88E-01 |
| 608.06369 | 277.34 | 15.60 | 15.49 | 15.24 | 15.52 | 6.87E-01 | 9.85E-01 | 6.40E-01 | 9.94E-01 | 8.56E-01 | 1.00E+00 | 8.25E-01 |
| 608.08881 | 298.08 | 17.03 | 16.39 | 16.60 | 15.90 | 4.91E-02 | 3.68E-01 | 6.93E-01 | 2.72E-02 | 9.53E-01 | 6.31E-01 | 3.17E-01 |
| 608.18938 | 279.1  | 12.80 | 18.24 | 18.33 | 16.53 | 3.49E-30 | 3.87E-14 | 3.74E-14 | 4.42E-13 | 9.97E-01 | 2.46E-03 | 1.12E-03 |
| 608.23493 | 38.15  | 12.69 | 14.09 | 14.28 | 16.50 | 4.92E-08 | 7.74E-02 | 3.13E-02 | 5.65E-09 | 9.89E-01 | 6.82E-04 | 1.89E-03 |
| 608.30955 | 49.12  | 13.28 | 15.65 | 16.48 | 15.13 | 5.32E-13 | 7.10E-08 | 3.32E-13 | 6.57E-05 | 1.81E-01 | 6.04E-01 | 7.85E-03 |
| 608.31467 | 278.63 | 15.96 | 18.17 | 18.13 | 17.56 | 3.82E-13 | 3.74E-11 | 4.94E-11 | 3.47E-06 | 9.99E-01 | 2.42E-01 | 2.85E-01 |
| 608.33537 | 279.25 | 15.65 | 14.31 | 14.36 | 14.60 | 1.39E-03 | 3.17E-03 | 4.46E-03 | 3.96E-02 | 9.99E-01 | 8.94E-01 | 9.36E-01 |
| 608.38749 | 27.5   | 16.19 | 10.52 | 13.47 | 11.43 | 1.01E-28 | 3.67E-14 | 2.37E-08 | 7.17E-14 | 5.07E-09 | 2.24E-01 | 1.35E-04 |
| 608.4397  | 278.79 | 15.63 | 17.86 | 17.96 | 16.94 | 4.68E-12 | 9.50E-10 | 1.08E-10 | 8.66E-04 | 9.90E-01 | 4.83E-02 | 2.01E-02 |
| 608.47244 | 47.98  | 15.46 | 16.52 | 15.43 | 15.14 | 1.47E-03 | 1.47E-02 | 1.00E+00 | 8.17E-01 | 1.47E-02 | 1.51E-03 | 8.60E-01 |
| 608.53293 | 46.16  | 16.16 | 17.55 | 16.38 | 16.61 | 1.52E-02 | 1.09E-02 | 9.59E-01 | 7.51E-01 | 5.34E-02 | 1.98E-01 | 9.58E-01 |
| 608.55799 | 47.5   | 15.26 | 16.92 | 16.81 | 15.75 | 7.70E-04 | 2.60E-03 | 5.41E-03 | 7.39E-01 | 9.95E-01 | 8.60E-02 | 1.39E-01 |
| 608.56529 | 276.53 | 12.39 | 14.89 | 15.08 | 14.66 | 2.02E-08 | 2.02E-06 | 2.00E-07 | 3.18E-05 | 9.78E-01 | 9.70E-01 | 8.34E-01 |
| 608.63944 | 46.83  | 17.93 | 19.77 | 19.77 | 19.25 | 9.30E-21 | 7.27E-14 | 7.41E-14 | 1.45E-09 | 1.00E+00 | 5.85E-02 | 5.66E-02 |
| 608.69068 | 277.88 | 15.27 | 16.83 | 16.19 | 15.65 | 7.39E-05 | 4.29E-05 | 3.44E-02 | 7.00E-01 | 2.54E-01 | 6.38E-03 | 4.30E-01 |
| 608.69542 | 47.69  | 9.71  | 11.55 | 11.65 | 10.24 | 1.30E-10 | 9.14E-08 | 1.22E-08 | 3.45E-01 | 9.89E-01 | 6.35E-04 | 1.66E-04 |
| 608.77623 | 39.15  | 12.86 | 14.77 | 15.50 | 15.06 | 1.32E-11 | 2.60E-06 | 3.65E-11 | 1.06E-07 | 2.11E-01 | 8.76E-01 | 6.63E-01 |
| 608.81032 | 278.13 | 13.38 | 14.13 | 14.46 | 13.72 | 2.93E-02 | 1.95E-01 | 2.18E-02 | 8.10E-01 | 8.29E-01 | 7.39E-01 | 2.49E-01 |
| 608.94078 | 274.79 | 15.26 | 14.54 | 14.36 | 14.44 | 3.97E-02 | 1.62E-01 | 4.73E-02 | 1.04E-01 | 9.61E-01 | 9.94E-01 | 9.96E-01 |
| 608.9704  | 54.19  | 16.10 | 17.84 | 17.50 | 16.52 | 7.15E-12 | 1.54E-10 | 2.38E-07 | 3.53E-01 | 5.28E-01 | 5.82E-06 | 1.25E-03 |
| 609.06377 | 276.8  | 15.46 | 14.12 | 14.87 | 14.88 | 8.85E-04 | 2.30E-04 | 2.42E-01 | 2.92E-01 | 1.05E-01 | 1.13E-01 | 1.00E+00 |
| 609.08577 | 279.22 | 14.92 | 18.24 | 19.24 | 17.57 | 1.75E-20 | 5.75E-13 | 7.03E-14 | 1.55E-08 | 8.70E-02 | 4.34E-01 | 9.59E-04 |
| 609.31494 | 278.93 | 15.92 | 14.76 | 14.78 | 15.17 | 2.36E-04 | 6.55E-04 | 7.91E-04 | 6.58E-02 | 1.00E+00 | 5.60E-01 | 6.05E-01 |
| 609.43792 | 279.35 | 15.00 | 14.36 | 14.73 | 14.29 | 2.34E-02 | 6.05E-02 | 7.07E-01 | 3.56E-02 | 4.90E-01 | 9.94E-01 | 3.56E-01 |
| 609.55992 | 278.9  | 14.92 | 14.75 | 14.57 | 14.31 | 2.07E-01 | 9.33E-01 | 6.04E-01 | 1.62E-01 | 9.28E-01 | 4.67E-01 | 8.21E-01 |
| 609.6405  | 48.87  | 13.45 | 15.65 | 15.67 | 15.02 | 4.99E-13 | 7.48E-11 | 3.28E-11 | 8.35E-06 | 1.00E+00 | 2.12E-01 | 1.80E-01 |
| 609.68634 | 279.07 | 15.49 | 16.76 | 16.46 | 15.71 | 2.43E-04 | 5.61E-04 | 1.35E-02 | 9.04E-01 | 7.92E-01 | 1.21E-02 | 1.23E-01 |
| 609.75953 | 44.4   | 13.04 | 11.83 | 11.40 | 12.30 | 2.62E-05 | 2.67E-03 | 1.36E-05 | 1.49E-01 | 6.07E-01 | 5.69E-01 | 6.20E-02 |
| 609.81094 | 279.22 | 15.66 | 17.97 | 17.91 | 17.21 | 1.20E-12 | 6.53E-11 | 1.42E-10 | 2.82E-05 | 9.97E-01 | 1.19E-01 | 1.70E-01 |
| 609.85817 | 55.29  | 16.98 | 11.97 | 11.75 | 12.08 | 6.63E-22 | 7.27E-14 | 7.42E-14 | 7.70E-14 | 9.82E-01 | 9.97E-01 | 9.43E-01 |
| 609.93549 | 279.45 | 15.74 | 18.38 | 18.37 | 17.65 | 3.10E-15 | 9.83E-13 | 7.30E-13 | 4.73E-07 | 1.00E+00 | 1.72E-01 | 1.73E-01 |
| 610.06052 | 279.27 | 15.81 | 18.34 | 18.54 | 17.35 | 5.80E-23 | 7.32E-14 | 6.85E-14 | 1.78E-07 | 8.74E-01 | 2.26E-03 | 1.16E-04 |
| 610.08617 | 61.03  | 10.98 | 13.64 | 13.96 | 13.38 | 2.30E-09 | 6.61E-07 | 1.63E-08 | 1.57E-05 | 9.19E-01 | 9.57E-01 | 6.67E-01 |
| 610.08765 | 288.39 | 12.16 | 14.60 | 15.21 | 14.61 | 5.94E-07 | 1.58E-04 | 9.92E-07 | 2.34E-04 | 7.24E-01 | 1.00E+00 | 7.47E-01 |
| 610.18448 | 20.31  | 18.05 | 17.43 | 18.31 | 18.00 | 5.33E-04 | 1.45E-02 | 5.64E-01 | 9.95E-01 | 2.13E-04 | 4.55E-02 | 4.62E-01 |
| 610.18793 | 277.1  | 16.49 | 16.76 | 16.50 | 16.22 | 2.89E-01 | 7.18E-01 | 1.00E+00 | 7.47E-01 | 7.64E-01 | 2.03E-01 | 7.29E-01 |

|           |        |       |       |       |       |          |          |          |          |          |          |          |
|-----------|--------|-------|-------|-------|-------|----------|----------|----------|----------|----------|----------|----------|
| 610.3143  | 279.49 | 16.61 | 18.55 | 18.63 | 18.07 | 3.91E-11 | 5.36E-09 | 7.71E-10 | 2.62E-05 | 9.93E-01 | 4.48E-01 | 2.92E-01 |
| 610.43859 | 278.98 | 15.88 | 18.11 | 17.90 | 17.16 | 1.87E-15 | 1.30E-13 | 4.63E-12 | 3.07E-05 | 8.71E-01 | 5.51E-03 | 4.63E-02 |
| 610.49232 | 279.01 | 13.89 | 15.07 | 14.82 | 14.21 | 1.80E-03 | 2.51E-03 | 2.50E-02 | 7.83E-01 | 8.85E-01 | 7.03E-02 | 2.94E-01 |
| 610.50696 | 47.92  | 16.23 | 15.77 | 15.45 | 15.52 | 1.64E-01 | 6.13E-01 | 1.65E-01 | 2.57E-01 | 8.49E-01 | 9.22E-01 | 9.99E-01 |
| 610.55301 | 42.85  | 17.06 | 14.22 | 13.27 | 14.28 | 1.78E-14 | 1.19E-08 | 1.04E-13 | 5.77E-08 | 1.76E-01 | 9.99E-01 | 1.49E-01 |
| 610.56386 | 276.42 | 14.91 | 15.32 | 15.30 | 15.28 | 5.75E-01 | 6.23E-01 | 6.56E-01 | 7.22E-01 | 1.00E+00 | 9.99E-01 | 1.00E+00 |
| 610.63791 | 46.39  | 16.93 | 18.96 | 18.89 | 18.11 | 4.29E-11 | 1.20E-09 | 2.98E-09 | 1.15E-03 | 9.96E-01 | 4.40E-02 | 7.14E-02 |
| 610.65833 | 278.79 | 15.75 | 14.97 | 15.17 | 14.82 | 7.59E-02 | 1.58E-01 | 4.07E-01 | 7.43E-02 | 9.49E-01 | 9.82E-01 | 7.99E-01 |
| 610.68986 | 277.75 | 15.73 | 16.93 | 16.39 | 15.86 | 5.99E-04 | 6.64E-04 | 1.32E-01 | 9.74E-01 | 3.14E-01 | 6.24E-03 | 3.57E-01 |
| 610.69026 | 47.89  | 9.48  | 11.82 | 12.75 | 11.32 | 1.92E-12 | 3.28E-07 | 7.08E-13 | 1.38E-04 | 1.33E-01 | 6.73E-01 | 6.97E-03 |
| 610.72876 | 47.32  | 15.28 | 17.36 | 17.60 | 17.66 | 9.38E-20 | 5.21E-13 | 7.47E-14 | 7.34E-14 | 8.25E-01 | 7.08E-01 | 9.95E-01 |
| 610.8181  | 278.28 | 15.34 | 17.35 | 16.69 | 16.26 | 3.39E-08 | 9.98E-09 | 1.58E-04 | 2.62E-02 | 1.93E-01 | 8.49E-03 | 5.76E-01 |
| 610.85093 | 52     | 15.55 | 15.15 | 15.97 | 14.20 | 3.76E-04 | 7.54E-01 | 7.05E-01 | 5.98E-03 | 1.88E-01 | 1.08E-01 | 1.84E-04 |
| 610.97566 | 54.04  | 20.19 | 22.20 | 21.72 | 20.89 | 1.03E-12 | 3.23E-12 | 8.48E-08 | 5.19E-02 | 2.78E-01 | 2.14E-05 | 1.40E-02 |
| 611.06453 | 277.8  | 15.57 | 14.40 | 14.63 | 14.55 | 9.80E-03 | 1.23E-02 | 6.40E-02 | 4.66E-02 | 9.32E-01 | 9.82E-01 | 9.97E-01 |
| 611.08938 | 293.5  | 15.14 | 13.89 | 14.38 | 13.74 | 1.21E-03 | 5.36E-03 | 1.71E-01 | 1.90E-03 | 5.81E-01 | 9.82E-01 | 3.70E-01 |
| 611.12752 | 76.45  | 13.44 | 15.02 | 12.48 | 14.90 | 4.44E-11 | 2.38E-04 | 5.27E-02 | 1.18E-03 | 2.12E-09 | 9.91E-01 | 2.64E-08 |
| 611.14411 | 244.68 | 10.05 | 13.87 | 13.87 | 11.59 | 3.60E-08 | 1.09E-06 | 8.53E-07 | 1.49E-01 | 1.00E+00 | 1.44E-02 | 1.34E-02 |
| 611.16281 | 277.5  | 14.46 | 13.70 | 14.06 | 13.73 | 3.22E-01 | 3.47E-01 | 8.22E-01 | 4.06E-01 | 8.62E-01 | 1.00E+00 | 8.96E-01 |
| 611.18486 | 21.12  | 17.37 | 15.65 | 17.06 | 16.84 | 1.72E-10 | 1.18E-10 | 5.63E-01 | 1.50E-01 | 2.97E-07 | 3.74E-05 | 8.33E-01 |
| 611.18741 | 277.89 | 15.29 | 14.44 | 14.79 | 15.38 | 2.53E-02 | 5.62E-02 | 4.28E-01 | 9.94E-01 | 7.41E-01 | 4.31E-02 | 3.38E-01 |
| 611.31608 | 279.25 | 15.65 | 17.37 | 17.00 | 16.62 | 7.32E-05 | 5.16E-05 | 2.12E-03 | 6.26E-02 | 7.77E-01 | 2.42E-01 | 7.70E-01 |
| 611.40964 | 52.3   | 13.62 | 15.49 | 15.25 | 14.10 | 4.20E-08 | 5.80E-07 | 1.43E-05 | 5.15E-01 | 8.96E-01 | 8.09E-04 | 7.92E-03 |
| 611.441   | 278.22 | 15.34 | 16.33 | 16.21 | 15.87 | 1.95E-02 | 2.12E-02 | 4.97E-02 | 4.21E-01 | 9.88E-01 | 5.92E-01 | 7.78E-01 |
| 611.47665 | 53.67  | 13.89 | 14.89 | 12.08 | 14.30 | 6.78E-12 | 3.28E-02 | 5.08E-06 | 7.02E-01 | 5.67E-12 | 4.12E-01 | 1.13E-07 |
| 611.54369 | 22.45  | 15.58 | 8.04  | 8.47  | 9.69  | 4.44E-63 | 3.65E-14 | 3.65E-14 | 3.65E-14 | 6.26E-01 | 6.17E-05 | 4.79E-03 |
| 611.56178 | 279.2  | 15.62 | 17.34 | 16.83 | 16.39 | 5.21E-06 | 2.22E-06 | 1.45E-03 | 1.05E-01 | 4.26E-01 | 3.39E-02 | 5.81E-01 |
| 611.60481 | 265.44 | 13.44 | 14.22 | 14.65 | 14.38 | 4.14E-02 | 2.91E-01 | 2.99E-02 | 1.65E-01 | 7.71E-01 | 9.86E-01 | 9.34E-01 |
| 611.63788 | 49.03  | 13.71 | 15.63 | 15.88 | 14.85 | 2.82E-12 | 3.98E-09 | 1.75E-11 | 1.37E-03 | 8.32E-01 | 6.56E-02 | 5.62E-03 |
| 611.68703 | 279.35 | 15.38 | 17.90 | 17.80 | 16.72 | 2.17E-14 | 1.96E-12 | 9.23E-12 | 4.99E-04 | 9.89E-01 | 3.73E-03 | 9.46E-03 |
| 611.72784 | 48.87  | 9.60  | 12.37 | 12.54 | 12.60 | 3.53E-12 | 1.52E-08 | 1.18E-09 | 2.10E-09 | 9.80E-01 | 5.99E-01 | 9.99E-01 |
| 611.8117  | 279.13 | 15.79 | 18.29 | 18.34 | 17.44 | 4.79E-16 | 3.71E-13 | 1.43E-13 | 2.92E-06 | 9.99E-01 | 5.09E-02 | 3.20E-02 |
| 611.84361 | 50.35  | 17.48 | 18.39 | 18.69 | 17.72 | 2.12E-07 | 4.34E-04 | 8.28E-07 | 7.38E-01 | 5.48E-01 | 2.66E-02 | 2.89E-04 |
| 611.93548 | 279.49 | 15.70 | 18.85 | 18.84 | 17.91 | 6.17E-24 | 7.25E-14 | 7.18E-14 | 9.79E-11 | 1.00E+00 | 1.88E-02 | 1.98E-02 |
| 611.97681 | 53.67  | 16.55 | 18.96 | 18.22 | 17.14 | 6.44E-07 | 8.69E-07 | 1.11E-03 | 5.67E-01 | 3.59E-01 | 8.01E-04 | 9.88E-02 |
| 612.06387 | 283.79 | 11.19 | 19.43 | 19.48 | 18.18 | 5.18E-30 | 4.14E-14 | 3.92E-14 | 7.59E-14 | 1.00E+00 | 3.34E-01 | 2.89E-01 |
| 612.10066 | 83.91  | 9.11  | 12.92 | 10.16 | 9.69  | 7.08E-11 | 7.12E-11 | 1.91E-01 | 7.06E-01 | 5.35E-06 | 2.04E-07 | 8.36E-01 |
| 612.18212 | 22.34  | 16.46 | 14.25 | 15.90 | 15.74 | 6.80E-15 | 7.58E-14 | 1.10E-01 | 2.92E-02 | 4.41E-09 | 3.03E-07 | 9.35E-01 |
| 612.18586 | 279.74 | 14.50 | 19.35 | 18.79 | 18.23 | 1.16E-23 | 6.54E-14 | 7.55E-14 | 3.62E-13 | 6.26E-01 | 9.17E-02 | 6.34E-01 |
| 612.31278 | 279.23 | 16.56 | 19.68 | 19.66 | 18.93 | 6.27E-20 | 7.58E-14 | 7.52E-14 | 4.65E-10 | 1.00E+00 | 1.54E-01 | 1.72E-01 |
| 612.33346 | 276.04 | 15.73 | 14.32 | 14.76 | 14.81 | 1.48E-03 | 7.40E-04 | 3.73E-02 | 6.56E-02 | 6.31E-01 | 5.80E-01 | 9.99E-01 |
| 612.4075  | 48.77  | 14.59 | 16.23 | 15.78 | 15.69 | 9.30E-07 | 5.17E-07 | 3.85E-04 | 2.10E-03 | 4.55E-01 | 3.12E-01 | 9.90E-01 |
| 612.43752 | 279.37 | 15.99 | 19.37 | 19.37 | 18.50 | 1.50E-28 | 4.36E-14 | 4.19E-14 | 1.05E-13 | 1.00E+00 | 2.68E-02 | 2.51E-02 |
| 612.47613 | 267.66 | 15.40 | 14.36 | 14.97 | 14.67 | 9.11E-03 | 5.32E-03 | 5.13E-01 | 1.07E-01 | 2.18E-01 | 7.76E-01 | 7.93E-01 |
| 612.50788 | 50.19  | 17.34 | 17.31 | 17.18 | 17.47 | 6.98E-01 | 9.99E-01 | 8.87E-01 | 9.52E-01 | 9.40E-01 | 9.21E-01 | 6.28E-01 |
| 612.5608  | 278.54 | 16.29 | 19.01 | 18.97 | 18.11 | 1.07E-19 | 7.45E-14 | 7.43E-14 | 3.88E-08 | 9.99E-01 | 2.06E-02 | 2.89E-02 |
| 612.59429 | 47.3   | 15.08 | 16.69 | 16.59 | 16.26 | 3.77E-10 | 5.54E-09 | 3.51E-08 | 4.81E-05 | 9.80E-01 | 3.72E-01 | 5.96E-01 |
| 612.62437 | 270.17 | 15.57 | 16.33 | 16.10 | 15.73 | 1.27E-01 | 1.24E-01 | 4.15E-01 | 9.72E-01 | 9.10E-01 | 3.47E-01 | 7.34E-01 |
| 612.63654 | 46.8   | 14.05 | 17.26 | 17.11 | 16.95 | 1.41E-22 | 7.51E-14 | 7.47E-14 | 7.97E-14 | 9.70E-01 | 8.02E-01 | 9.65E-01 |
| 612.68977 | 278.34 | 16.01 | 18.77 | 18.49 | 18.03 | 5.94E-17 | 7.64E-14 | 6.99E-13 | 1.22E-08 | 8.15E-01 | 1.23E-01 | 5.18E-01 |
| 612.69381 | 48.69  | 8.55  | 8.78  | 9.14  | 9.47  | 1.31E-01 | 9.37E-01 | 4.47E-01 | 1.12E-01 | 8.20E-01 | 3.60E-01 | 8.54E-01 |
| 612.72575 | 48.07  | 14.89 | 17.68 | 17.87 | 18.14 | 7.63E-24 | 7.41E-14 | 7.48E-14 | 7.29E-14 | 9.32E-01 | 4.87E-01 | 8.31E-01 |
| 612.76614 | 265.1  | 15.76 | 16.24 | 16.47 | 15.79 | 1.89E-02 | 2.51E-01 | 3.16E-02 | 9.99E-01 | 8.26E-01 | 3.58E-01 | 6.38E-02 |
| 612.81458 | 277.59 | 14.93 | 14.51 | 14.88 | 15.07 | 1.81E-01 | 3.26E-01 | 9.96E-01 | 9.52E-01 | 4.76E-01 | 1.51E-01 | 8.85E-01 |
| 612.83804 | 270.79 | 16.03 | 16.32 | 16.22 | 16.29 | 7.63E-01 | 7.63E-01 | 9.19E-01 | 8.22E-01 | 9.87E-01 | 1.00E+00 | 9.95E-01 |
| 612.84673 | 51.96  | 15.06 | 13.70 | 13.81 | 12.80 | 1.01E-06 | 2.95E-03 | 6.72E-03 | 2.25E-07 | 9.93E-01 | 1.25E-01 | 6.50E-02 |
| 612.93877 | 42.07  | 7.89  | 10.17 | 14.19 | 10.73 | 7.36E-22 | 3.27E-04 | 4.76E-14 | 7.87E-06 | 1.48E-10 | 7.83E-01 | 7.52E-08 |
| 612.9709  | 53.65  | 17.51 | 19.32 | 18.76 | 18.00 | 5.50E-10 | 8.29E-10 | 2.92E-05 | 2.82E-01 | 1.73E-01 | 3.69E-05 | 4.04E-02 |
| 612.98089 | 270.51 | 16.46 | 15.55 | 15.10 | 15.34 | 1.54E-03 | 6.24E-02 | 1.24E-03 | 1.65E-02 | 6.31E-01 | 9.52E-01 | 9.22E-01 |
| 613.08002 | 42.34  | 17.44 | 16.47 | 17.19 | 18.16 | 7.16E-04 | 5.31E-02 | 9.04E-01 | 2.61E-01 | 2.55E-01 | 2.27E-04 | 7.38E-02 |
| 613.15916 | 272.67 | 19.41 | 22.66 | 23.38 | 22.63 | 1.06E-37 | 3.76E-14 | 3.65E-14 | 4.12E-14 | 4.40E-02 | 1.00E+00 | 4.10E-02 |
| 613.31555 | 279.24 | 16.13 | 18.30 | 18.20 | 17.58 | 2.65E-10 | 4.36E-09 | 1.68E-08 | 2.25E-04 | 9.91E-01 | 1.86E-01 | 3.06E-01 |
| 613.40724 | 48.14  | 13.07 | 13.57 | 11.98 | 13.06 | 4.84E-03 | 6.66E-01 | 5.76E-02 | 1.00E+00 | 2.53E-03 | 6.93E-01 | 8.58E-02 |
| 613.43984 | 279.32 | 15.61 | 18.17 | 18.11 | 17.30 | 2.31E-14 | 2.70E-12 | 4.86E-12 | 7.82E-06 | 9.98E-01 | 7.00E-02 | 9.77E-02 |
| 613.48104 | 23.13  | 14.06 | 6.17  | 6.54  | 7.63  | 4.25E-41 | 3.65E-14 | 3.65E-14 | 3.87E-14 | 8.98E-01 | 4.08E-02 | 1.88E-01 |
| 613.51794 | 54.04  | 11.90 | 10.00 | 9.70  | 12.41 | 9.40E-05 | 2.54E-02 | 5.85E-03 | 8.80E-01 | 9.72E-01 | 4.44E-03 | 8.76E-04 |
| 613.52109 | 276.42 | 13.86 | 14.43 | 14.18 | 14.78 | 3.61E-01 | 6.84E-01 | 9.25E-01 | 3.00E-01 | 9.63E-01 | 9.16E-01 | 6.75E-01 |
| 613.56447 | 279.35 | 16.01 | 18.44 | 18.40 | 17.22 | 2.90E-16 | 2.01E-13 | 2.46E-13 | 5.47E-04 | 9.99E-01 | 7.84E-04 | 1.08E-03 |

|           |        |       |       |       |       |          |          |          |          |          |          |          |
|-----------|--------|-------|-------|-------|-------|----------|----------|----------|----------|----------|----------|----------|
| 613.63562 | 48.82  | 10.43 | 13.00 | 13.01 | 11.80 | 1.12E-07 | 1.66E-06 | 1.18E-06 | 3.27E-02 | 1.00E+00 | 9.15E-02 | 8.38E-02 |
| 613.65926 | 280.39 | 15.29 | 14.97 | 14.82 | 14.58 | 3.12E-01 | 8.21E-01 | 5.81E-01 | 2.51E-01 | 9.81E-01 | 7.62E-01 | 9.28E-01 |
| 613.69425 | 279.2  | 15.72 | 18.77 | 18.61 | 17.52 | 3.36E-19 | 7.33E-14 | 7.36E-14 | 1.29E-06 | 9.60E-01 | 2.18E-03 | 9.94E-03 |
| 613.72344 | 49.48  | 11.22 | 14.30 | 14.98 | 14.48 | 3.83E-21 | 2.24E-13 | 7.36E-14 | 1.04E-13 | 2.92E-01 | 9.67E-01 | 5.90E-01 |
| 613.81582 | 279.38 | 16.22 | 18.69 | 18.74 | 17.85 | 5.03E-16 | 3.84E-13 | 1.46E-13 | 3.14E-06 | 9.99E-01 | 4.97E-02 | 3.12E-02 |
| 613.84043 | 50.78  | 16.97 | 18.15 | 18.56 | 17.41 | 1.81E-07 | 2.53E-04 | 3.17E-07 | 4.27E-01 | 5.15E-01 | 6.82E-02 | 9.55E-04 |
| 613.93356 | 279.23 | 16.01 | 19.20 | 19.04 | 18.01 | 1.35E-21 | 7.58E-14 | 7.36E-14 | 2.68E-08 | 9.61E-01 | 2.92E-03 | 1.28E-02 |
| 613.95268 | 53.15  | 13.56 | 13.02 | 14.53 | 11.70 | 7.28E-06 | 7.20E-01 | 2.24E-01 | 2.67E-03 | 2.26E-02 | 7.17E-02 | 1.89E-06 |
| 614.06219 | 279.28 | 15.32 | 19.24 | 19.28 | 17.96 | 1.54E-26 | 5.74E-14 | 5.14E-14 | 4.03E-11 | 1.00E+00 | 4.11E-03 | 2.66E-03 |
| 614.08329 | 42.48  | 14.10 | 11.32 | 12.54 | 14.15 | 4.98E-08 | 6.17E-07 | 1.11E-02 | 1.00E+00 | 8.84E-02 | 1.86E-06 | 1.48E-02 |
| 614.11957 | 278.83 | 15.35 | 14.83 | 15.01 | 15.14 | 4.54E-01 | 3.86E-01 | 7.21E-01 | 9.23E-01 | 9.50E-01 | 8.09E-01 | 9.82E-01 |
| 614.16236 | 271.97 | 17.74 | 20.17 | 21.35 | 20.30 | 2.56E-30 | 7.54E-14 | 3.65E-14 | 7.52E-14 | 1.44E-04 | 9.70E-01 | 1.27E-03 |
| 614.18844 | 279.33 | 16.19 | 19.14 | 19.15 | 18.13 | 6.70E-29 | 4.19E-14 | 3.94E-14 | 7.08E-12 | 1.00E+00 | 1.15E-03 | 8.60E-04 |
| 614.31426 | 279.39 | 16.27 | 19.26 | 19.22 | 18.49 | 2.62E-16 | 1.78E-13 | 1.95E-13 | 6.31E-08 | 1.00E+00 | 1.91E-01 | 2.22E-01 |
| 614.43725 | 279.31 | 16.21 | 18.62 | 18.68 | 17.79 | 2.54E-15 | 1.33E-12 | 3.24E-13 | 6.98E-06 | 9.98E-01 | 5.61E-02 | 3.35E-02 |
| 614.50149 | 46.97  | 16.41 | 16.41 | 15.87 | 15.83 | 1.97E-01 | 1.00E+00 | 4.07E-01 | 3.66E-01 | 4.52E-01 | 4.08E-01 | 9.99E-01 |
| 614.56188 | 279.17 | 15.49 | 18.18 | 18.11 | 17.25 | 5.63E-24 | 6.78E-14 | 7.23E-14 | 8.01E-10 | 9.93E-01 | 4.01E-03 | 8.67E-03 |
| 614.59039 | 47.2   | 16.81 | 18.41 | 18.40 | 17.64 | 6.71E-09 | 1.47E-07 | 1.37E-07 | 1.82E-02 | 1.00E+00 | 4.84E-02 | 5.06E-02 |
| 614.68912 | 277.03 | 15.88 | 14.61 | 15.06 | 14.89 | 5.65E-06 | 3.75E-06 | 5.79E-03 | 7.90E-04 | 2.76E-01 | 6.99E-01 | 9.11E-01 |
| 614.71216 | 48.68  | 15.56 | 12.50 | 11.60 | 12.44 | 2.30E-12 | 1.51E-07 | 6.50E-12 | 1.75E-07 | 3.44E-01 | 9.99E-01 | 4.34E-01 |
| 614.72144 | 48.72  | 14.66 | 16.59 | 16.54 | 17.19 | 1.71E-15 | 1.04E-09 | 1.94E-09 | 8.92E-14 | 9.98E-01 | 2.10E-01 | 1.46E-01 |
| 614.81289 | 279.03 | 13.17 | 16.17 | 15.93 | 15.68 | 2.50E-08 | 2.78E-07 | 1.93E-06 | 3.81E-05 | 9.73E-01 | 8.22E-01 | 9.69E-01 |
| 614.92416 | 274.89 | 15.60 | 16.47 | 16.17 | 15.42 | 6.76E-02 | 1.72E-01 | 5.22E-01 | 9.76E-01 | 9.03E-01 | 9.23E-02 | 3.30E-01 |
| 614.9288  | 73.38  | 16.21 | 13.03 | 12.15 | 12.10 | 4.72E-12 | 1.34E-06 | 3.41E-10 | 8.55E-10 | 4.72E-01 | 4.53E-01 | 1.00E+00 |
| 615.0638  | 279.08 | 16.04 | 16.26 | 15.70 | 15.92 | 4.86E-01 | 9.26E-01 | 7.62E-01 | 9.87E-01 | 4.10E-01 | 8.02E-01 | 9.32E-01 |
| 615.12461 | 275.33 | 15.15 | 17.19 | 16.99 | 16.25 | 8.57E-05 | 1.54E-04 | 7.12E-04 | 1.11E-01 | 9.76E-01 | 2.46E-01 | 4.52E-01 |
| 615.16296 | 273.71 | 17.04 | 15.62 | 16.50 | 17.17 | 4.17E-03 | 9.16E-03 | 6.27E-01 | 9.91E-01 | 2.14E-01 | 6.39E-03 | 4.86E-01 |
| 615.18812 | 274.5  | 14.94 | 17.19 | 16.63 | 16.79 | 2.72E-11 | 9.84E-11 | 1.05E-06 | 2.49E-07 | 3.16E-01 | 6.26E-01 | 9.67E-01 |
| 615.31865 | 279.04 | 16.50 | 19.10 | 18.84 | 18.33 | 2.00E-12 | 2.67E-11 | 1.38E-09 | 6.32E-06 | 8.88E-01 | 1.73E-01 | 5.23E-01 |
| 615.44057 | 279.31 | 15.88 | 18.68 | 18.80 | 17.47 | 3.84E-19 | 7.68E-14 | 7.41E-14 | 1.19E-05 | 9.80E-01 | 2.30E-03 | 5.03E-04 |
| 615.49772 | 22.49  | 17.03 | 9.80  | 11.07 | 12.59 | 3.28E-42 | 3.65E-14 | 3.65E-14 | 7.53E-14 | 2.36E-02 | 2.89E-08 | 5.18E-03 |
| 615.52388 | 53.82  | 13.57 | 17.28 | 17.46 | 16.49 | 4.25E-20 | 7.43E-14 | 7.49E-14 | 2.92E-10 | 9.73E-01 | 2.71E-01 | 1.13E-01 |
| 615.5249  | 274.57 | 13.56 | 16.10 | 15.54 | 14.39 | 1.06E-05 | 1.53E-05 | 1.07E-03 | 4.17E-01 | 7.27E-01 | 1.28E-02 | 1.62E-01 |
| 615.5659  | 279.33 | 15.89 | 19.33 | 19.32 | 18.17 | 6.43E-35 | 3.65E-14 | 3.65E-14 | 8.00E-14 | 1.00E+00 | 1.76E-04 | 1.77E-04 |
| 615.69166 | 277.63 | 16.17 | 19.43 | 19.41 | 17.95 | 1.15E-23 | 7.16E-14 | 7.23E-14 | 6.09E-07 | 1.00E+00 | 9.87E-05 | 9.90E-05 |
| 615.7223  | 49.39  | 10.69 | 12.86 | 13.18 | 12.84 | 5.54E-11 | 1.29E-07 | 7.95E-10 | 3.33E-07 | 8.30E-01 | 1.00E+00 | 8.23E-01 |
| 615.7256  | 275.95 | 14.84 | 15.46 | 15.11 | 14.54 | 2.34E-01 | 4.79E-01 | 9.25E-01 | 9.10E-01 | 8.55E-01 | 1.91E-01 | 6.04E-01 |
| 615.81634 | 277.69 | 16.03 | 19.35 | 19.22 | 18.14 | 5.48E-24 | 6.85E-14 | 7.16E-14 | 2.23E-09 | 9.78E-01 | 1.71E-03 | 5.96E-03 |
| 615.83774 | 50.89  | 15.62 | 16.31 | 16.10 | 14.85 | 1.17E-06 | 4.01E-02 | 2.50E-01 | 2.13E-02 | 8.48E-01 | 1.41E-06 | 4.47E-05 |
| 615.94103 | 277.32 | 15.13 | 18.67 | 18.76 | 17.83 | 1.63E-28 | 4.72E-14 | 4.10E-14 | 9.23E-14 | 9.93E-01 | 5.30E-02 | 2.47E-02 |
| 615.95729 | 52.96  | 16.12 | 17.93 | 18.14 | 16.36 | 1.93E-13 | 2.05E-08 | 2.49E-10 | 8.53E-01 | 8.95E-01 | 5.80E-06 | 1.61E-07 |
| 616.02493 | 53.95  | 10.87 | 13.01 | 13.11 | 12.23 | 8.16E-04 | 2.97E-03 | 1.46E-03 | 1.32E-01 | 9.99E-01 | 6.22E-01 | 5.16E-01 |
| 616.06602 | 279.27 | 15.37 | 18.86 | 18.94 | 17.96 | 1.90E-26 | 6.10E-14 | 5.12E-14 | 8.17E-13 | 9.94E-01 | 4.29E-02 | 2.03E-02 |
| 616.1292  | 95.62  | 7.87  | 12.33 | 12.53 | 10.67 | 1.83E-17 | 1.20E-13 | 7.65E-14 | 3.99E-06 | 9.82E-01 | 1.95E-02 | 5.72E-03 |
| 616.15599 | 284.96 | 15.86 | 16.74 | 17.39 | 17.16 | 1.26E-05 | 3.12E-02 | 1.22E-05 | 5.21E-04 | 1.85E-01 | 5.92E-01 | 8.96E-01 |
| 616.17833 | 53.03  | 20.38 | 18.78 | 16.67 | 20.75 | 1.30E-11 | 2.49E-02 | 1.31E-09 | 9.23E-01 | 1.78E-03 | 6.23E-03 | 3.35E-10 |
| 616.19121 | 279.22 | 16.56 | 18.18 | 18.10 | 17.39 | 1.93E-07 | 1.38E-06 | 3.65E-06 | 4.02E-02 | 9.95E-01 | 7.03E-02 | 1.17E-01 |
| 616.31769 | 278.1  | 15.52 | 14.93 | 15.02 | 15.53 | 2.04E-01 | 3.31E-01 | 4.73E-01 | 1.00E+00 | 9.94E-01 | 3.75E-01 | 5.15E-01 |
| 616.44036 | 279.48 | 15.92 | 15.91 | 15.39 | 15.54 | 3.53E-01 | 1.00E+00 | 4.24E-01 | 7.28E-01 | 4.69E-01 | 7.61E-01 | 9.74E-01 |
| 616.4479  | 46.96  | 15.65 | 11.50 | 12.21 | 11.83 | 4.17E-23 | 7.23E-14 | 8.16E-14 | 7.38E-14 | 3.03E-01 | 8.63E-01 | 7.97E-01 |
| 616.45685 | 52.92  | 10.72 | 11.47 | 12.58 | 9.93  | 5.21E-05 | 5.04E-01 | 3.24E-03 | 4.92E-01 | 1.86E-01 | 3.85E-02 | 3.02E-05 |
| 616.50019 | 39.77  | 16.10 | 12.85 | 12.26 | 13.14 | 5.14E-17 | 8.77E-12 | 7.45E-14 | 1.30E-09 | 5.43E-01 | 9.20E-01 | 2.13E-01 |
| 616.52252 | 57.61  | 14.41 | 15.48 | 15.66 | 15.25 | 2.72E-03 | 1.59E-02 | 2.58E-03 | 1.02E-01 | 9.56E-01 | 9.30E-01 | 6.84E-01 |
| 616.5661  | 279.56 | 15.84 | 17.09 | 16.53 | 16.31 | 5.32E-03 | 2.10E-03 | 1.87E-01 | 5.48E-01 | 3.90E-01 | 1.47E-01 | 9.32E-01 |
| 616.58762 | 47.34  | 16.51 | 18.39 | 18.33 | 17.55 | 3.07E-09 | 4.84E-08 | 9.40E-08 | 7.22E-03 | 9.98E-01 | 6.06E-02 | 8.78E-02 |
| 616.67239 | 46.41  | 15.99 | 18.70 | 18.43 | 18.57 | 9.58E-34 | 3.65E-14 | 4.14E-14 | 3.87E-14 | 6.14E-01 | 9.43E-01 | 9.24E-01 |
| 616.68845 | 285.56 | 15.84 | 17.48 | 17.56 | 16.84 | 3.77E-05 | 2.65E-04 | 9.52E-05 | 6.86E-02 | 9.97E-01 | 4.15E-01 | 3.00E-01 |
| 616.81369 | 49.64  | 9.39  | 10.06 | 9.86  | 12.25 | 9.66E-05 | 6.99E-01 | 8.64E-01 | 6.21E-05 | 9.90E-01 | 5.30E-03 | 1.70E-03 |
| 616.81511 | 279.47 | 13.38 | 18.35 | 18.51 | 17.48 | 6.05E-23 | 7.41E-14 | 7.36E-14 | 8.79E-13 | 9.89E-01 | 3.68E-01 | 2.14E-01 |
| 616.9392  | 279.38 | 15.99 | 18.38 | 18.37 | 17.78 | 2.89E-10 | 1.17E-08 | 9.77E-09 | 4.82E-05 | 1.00E+00 | 4.48E-01 | 4.55E-01 |
| 616.95601 | 52.83  | 13.98 | 16.73 | 16.75 | 15.01 | 3.32E-13 | 1.82E-10 | 9.56E-11 | 5.51E-02 | 1.00E+00 | 2.89E-04 | 2.13E-04 |
| 617.02091 | 196.12 | 10.13 | 13.39 | 14.91 | 12.97 | 8.22E-16 | 1.48E-08 | 7.26E-14 | 1.96E-06 | 2.72E-02 | 8.68E-01 | 2.93E-03 |
| 617.05354 | 86.58  | 9.83  | 17.28 | 17.81 | 15.63 | 4.91E-56 | 3.65E-14 | 3.65E-14 | 3.65E-14 | 5.71E-01 | 7.43E-04 | 2.88E-06 |
| 617.06673 | 279.53 | 16.40 | 18.21 | 18.27 | 17.45 | 9.85E-09 | 3.25E-07 | 9.50E-08 | 8.99E-03 | 9.98E-01 | 1.18E-01 | 7.52E-02 |
| 617.10649 | 277.54 | 15.64 | 14.66 | 15.72 | 15.68 | 2.95E-02 | 6.53E-02 | 9.97E-01 | 1.00E+00 | 4.66E-02 | 7.56E-02 | 1.00E+00 |
| 617.12214 | 67.26  | 8.75  | 11.93 | 10.87 | 11.27 | 2.62E-07 | 2.32E-07 | 9.55E-04 | 9.98E-05 | 2.50E-01 | 6.79E-01 | 9.03E-01 |
| 617.17432 | 57.65  | 17.99 | 16.08 | 12.44 | 18.45 | 2.60E-13 | 6.33E-02 | 2.96E-11 | 9.38E-01 | 3.68E-05 | 2.01E-02 | 1.17E-01 |
| 617.18381 | 286.34 | 15.90 | 15.36 | 14.87 | 15.75 | 4.11E-02 | 4.79E-01 | 3.41E-02 | 9.78E-01 | 6.01E-01 | 7.67E-01 | 1.30E-01 |

|           |        |       |       |       |       |          |          |          |          |          |          |          |
|-----------|--------|-------|-------|-------|-------|----------|----------|----------|----------|----------|----------|----------|
| 617.31616 | 279.53 | 16.53 | 18.62 | 18.68 | 17.86 | 7.65E-11 | 5.99E-09 | 1.46E-09 | 5.52E-04 | 9.98E-01 | 1.33E-01 | 8.45E-02 |
| 617.44027 | 279.51 | 15.96 | 19.03 | 19.02 | 17.68 | 4.03E-17 | 1.01E-13 | 9.38E-14 | 4.01E-05 | 1.00E+00 | 3.05E-03 | 2.99E-03 |
| 617.51333 | 23.12  | 18.30 | 15.14 | 15.92 | 16.61 | 2.79E-09 | 1.69E-09 | 6.32E-06 | 3.77E-03 | 3.81E-01 | 2.11E-02 | 5.21E-01 |
| 617.56614 | 279.26 | 16.37 | 18.63 | 18.69 | 17.42 | 1.61E-13 | 7.55E-11 | 1.65E-11 | 7.53E-03 | 9.98E-01 | 2.11E-03 | 9.89E-04 |
| 617.57183 | 65.48  | 12.71 | 11.97 | 12.42 | 12.00 | 6.42E-01 | 6.76E-01 | 9.72E-01 | 7.23E-01 | 9.08E-01 | 1.00E+00 | 9.29E-01 |
| 617.60828 | 279.21 | 14.34 | 13.13 | 14.16 | 13.86 | 6.32E-02 | 5.03E-02 | 9.81E-01 | 7.44E-01 | 1.39E-01 | 4.61E-01 | 9.23E-01 |
| 617.69332 | 277.73 | 15.66 | 19.82 | 19.56 | 18.92 | 1.63E-25 | 5.72E-14 | 7.14E-14 | 1.04E-13 | 9.05E-01 | 1.14E-01 | 3.78E-01 |
| 617.81187 | 54.08  | 12.02 | 12.71 | 13.33 | 13.38 | 1.24E-02 | 4.33E-01 | 2.29E-02 | 2.31E-02 | 5.60E-01 | 5.28E-01 | 1.00E+00 |
| 617.82202 | 275.1  | 16.41 | 20.57 | 20.41 | 19.17 | 1.08E-29 | 3.76E-14 | 4.07E-14 | 9.03E-13 | 9.65E-01 | 7.55E-04 | 3.54E-03 |
| 617.92283 | 279.51 | 12.19 | 13.52 | 13.05 | 12.32 | 2.34E-01 | 2.50E-01 | 6.16E-01 | 9.98E-01 | 9.21E-01 | 3.96E-01 | 7.67E-01 |
| 617.92446 | 53.73  | 15.84 | 14.63 | 12.85 | 12.30 | 2.63E-08 | 1.93E-01 | 6.65E-06 | 1.98E-07 | 2.14E-02 | 1.73E-03 | 8.19E-01 |
| 617.94831 | 275.52 | 16.49 | 21.31 | 21.09 | 19.82 | 4.28E-40 | 3.65E-14 | 3.65E-14 | 7.32E-14 | 9.04E-01 | 8.12E-05 | 9.93E-04 |
| 618.05863 | 65.53  | 14.13 | 15.12 | 15.98 | 13.27 | 2.51E-04 | 3.73E-01 | 1.33E-02 | 5.14E-01 | 5.13E-01 | 2.38E-02 | 1.98E-04 |
| 618.0736  | 275.13 | 16.55 | 21.13 | 20.80 | 19.75 | 1.94E-36 | 3.65E-14 | 3.65E-14 | 7.26E-14 | 7.49E-01 | 3.83E-04 | 1.08E-02 |
| 618.10975 | 275.39 | 12.82 | 16.11 | 15.69 | 15.30 | 1.70E-06 | 4.32E-06 | 6.55E-05 | 1.28E-03 | 9.22E-01 | 6.39E-01 | 9.39E-01 |
| 618.19849 | 274.08 | 16.41 | 20.62 | 20.48 | 19.24 | 7.95E-34 | 3.65E-14 | 3.65E-14 | 7.78E-14 | 9.74E-01 | 3.18E-04 | 1.35E-03 |
| 618.2568  | 42.49  | 10.37 | 14.86 | 14.78 | 15.62 | 2.38E-23 | 7.45E-14 | 7.43E-14 | 7.12E-14 | 9.98E-01 | 4.72E-01 | 3.71E-01 |
| 618.32421 | 274.04 | 16.47 | 19.91 | 19.69 | 18.73 | 3.77E-27 | 4.34E-14 | 5.78E-14 | 1.18E-11 | 8.88E-01 | 1.21E-03 | 1.19E-02 |
| 618.44482 | 45.68  | 16.49 | 13.60 | 13.37 | 13.78 | 5.16E-20 | 8.29E-14 | 7.47E-14 | 8.64E-13 | 9.11E-01 | 9.57E-01 | 6.52E-01 |
| 618.44815 | 275.6  | 15.57 | 18.86 | 18.58 | 18.09 | 4.00E-16 | 1.09E-13 | 1.81E-12 | 1.13E-08 | 9.04E-01 | 2.51E-01 | 6.25E-01 |
| 618.52488 | 45.15  | 17.50 | 18.92 | 18.32 | 18.40 | 4.35E-04 | 1.47E-04 | 5.86E-02 | 3.98E-02 | 2.96E-01 | 4.56E-01 | 9.96E-01 |
| 618.5693  | 270.18 | 16.61 | 18.11 | 18.35 | 18.02 | 2.77E-05 | 7.63E-04 | 5.34E-05 | 2.61E-03 | 9.33E-01 | 9.96E-01 | 8.48E-01 |
| 618.5858  | 47.36  | 15.90 | 17.33 | 17.22 | 16.89 | 2.71E-09 | 2.09E-08 | 1.97E-07 | 2.75E-04 | 9.66E-01 | 2.81E-01 | 5.34E-01 |
| 618.66952 | 46.51  | 16.44 | 19.16 | 19.08 | 18.65 | 5.92E-23 | 7.43E-14 | 7.36E-14 | 4.44E-13 | 9.91E-01 | 2.85E-01 | 4.35E-01 |
| 618.70197 | 273.32 | 15.99 | 14.87 | 15.20 | 14.88 | 2.63E-03 | 5.18E-03 | 8.26E-02 | 7.41E-03 | 7.70E-01 | 1.00E+00 | 7.95E-01 |
| 618.78483 | 279.75 | 15.36 | 14.03 | 14.66 | 14.97 | 3.07E-02 | 1.71E-02 | 3.89E-01 | 8.28E-01 | 5.19E-01 | 1.99E-01 | 9.12E-01 |
| 618.81757 | 278.14 | 16.02 | 19.63 | 19.33 | 18.98 | 4.85E-18 | 7.58E-14 | 1.72E-13 | 9.76E-11 | 8.87E-01 | 4.31E-01 | 8.45E-01 |
| 618.82878 | 277.56 | 15.61 | 14.22 | 14.61 | 14.84 | 1.39E-05 | 6.05E-06 | 1.77E-03 | 3.80E-02 | 5.20E-01 | 1.44E-01 | 8.44E-01 |
| 618.9031  | 280.63 | 15.02 | 14.44 | 14.25 | 14.27 | 1.67E-01 | 4.48E-01 | 1.93E-01 | 2.40E-01 | 9.64E-01 | 9.75E-01 | 1.00E+00 |
| 618.93968 | 279.76 | 17.15 | 20.51 | 20.53 | 19.66 | 1.35E-21 | 7.38E-14 | 7.45E-14 | 1.55E-10 | 1.00E+00 | 9.51E-02 | 8.16E-02 |
| 618.95965 | 52.33  | 16.17 | 18.67 | 18.07 | 17.69 | 6.86E-12 | 5.60E-12 | 1.28E-07 | 7.05E-05 | 2.84E-01 | 2.67E-02 | 6.87E-01 |
| 619.02923 | 53.71  | 12.82 | 16.10 | 14.68 | 14.95 | 3.04E-12 | 5.59E-13 | 5.20E-05 | 5.97E-06 | 4.60E-03 | 4.19E-02 | 9.24E-01 |
| 619.06739 | 279.75 | 15.85 | 20.84 | 20.77 | 20.11 | 2.01E-29 | 4.19E-14 | 4.30E-14 | 7.54E-14 | 9.98E-01 | 3.69E-01 | 4.58E-01 |
| 619.08102 | 278.23 | 15.31 | 14.25 | 14.73 | 14.64 | 5.37E-03 | 2.22E-03 | 1.91E-01 | 1.21E-01 | 3.93E-01 | 5.97E-01 | 9.92E-01 |
| 619.12231 | 285.08 | 16.00 | 16.90 | 17.49 | 17.26 | 1.13E-04 | 4.51E-02 | 1.04E-04 | 2.20E-03 | 3.38E-01 | 7.45E-01 | 9.26E-01 |
| 619.1635  | 25.49  | 11.81 | 6.46  | 6.88  | 11.98 | 7.21E-17 | 3.56E-11 | 7.08E-10 | 9.96E-01 | 9.43E-01 | 1.09E-10 | 1.81E-09 |
| 619.18862 | 279.76 | 16.60 | 20.83 | 20.72 | 19.98 | 7.92E-30 | 3.87E-14 | 4.12E-14 | 7.48E-14 | 9.90E-01 | 1.04E-01 | 1.88E-01 |
| 619.21987 | 280.01 | 13.63 | 14.25 | 13.87 | 14.56 | 2.43E-01 | 5.51E-01 | 9.52E-01 | 2.19E-01 | 8.66E-01 | 9.25E-01 | 5.10E-01 |
| 619.28895 | 279.31 | 15.95 | 14.52 | 14.84 | 14.72 | 3.25E-04 | 4.78E-04 | 9.92E-03 | 4.95E-03 | 8.21E-01 | 9.53E-01 | 9.89E-01 |
| 619.31847 | 280.12 | 17.18 | 20.69 | 20.63 | 20.03 | 2.35E-21 | 7.49E-14 | 7.49E-14 | 5.17E-12 | 9.99E-01 | 3.16E-01 | 3.90E-01 |
| 619.39797 | 51.28  | 13.11 | 14.45 | 14.08 | 12.11 | 2.65E-06 | 1.24E-02 | 1.14E-01 | 1.15E-01 | 8.38E-01 | 4.72E-06 | 1.43E-04 |
| 619.44355 | 280.27 | 16.44 | 20.29 | 20.15 | 19.59 | 4.29E-25 | 6.47E-14 | 7.18E-14 | 8.70E-14 | 9.82E-01 | 2.60E-01 | 4.48E-01 |
| 619.46459 | 53.28  | 13.36 | 13.32 | 12.63 | 12.79 | 2.46E-02 | 9.99E-01 | 5.03E-02 | 2.10E-01 | 8.79E-02 | 2.99E-01 | 9.51E-01 |
| 619.52714 | 44.31  | 18.13 | 17.52 | 16.69 | 17.40 | 3.25E-05 | 1.48E-01 | 6.11E-06 | 6.90E-02 | 2.93E-02 | 9.81E-01 | 9.29E-02 |
| 619.56848 | 279.98 | 16.02 | 19.87 | 19.82 | 19.03 | 2.94E-28 | 4.50E-14 | 4.59E-14 | 7.82E-14 | 9.99E-01 | 8.10E-02 | 1.08E-01 |
| 619.67001 | 48.96  | 10.59 | 15.11 | 14.75 | 14.41 | 3.82E-28 | 4.21E-14 | 6.18E-14 | 7.52E-14 | 8.05E-01 | 3.21E-01 | 8.32E-01 |
| 619.69197 | 279.59 | 16.39 | 19.27 | 19.33 | 18.69 | 4.50E-18 | 8.67E-14 | 7.69E-14 | 1.41E-09 | 9.98E-01 | 3.56E-01 | 2.66E-01 |
| 619.81813 | 279.51 | 16.34 | 18.70 | 18.49 | 17.88 | 6.49E-11 | 6.35E-10 | 1.24E-08 | 1.34E-04 | 9.39E-01 | 1.23E-01 | 3.43E-01 |
| 619.94263 | 279.4  | 15.49 | 17.70 | 17.36 | 17.00 | 9.48E-07 | 1.55E-06 | 5.33E-05 | 2.82E-03 | 8.57E-01 | 3.82E-01 | 8.37E-01 |
| 619.9602  | 57.67  | 15.36 | 17.22 | 16.44 | 15.96 | 3.32E-07 | 9.49E-08 | 4.07E-03 | 2.55E-01 | 7.64E-02 | 1.26E-03 | 4.84E-01 |
| 620.0249  | 53.12  | 10.99 | 12.46 | 11.13 | 12.31 | 2.13E-03 | 1.04E-02 | 9.90E-01 | 3.27E-02 | 3.14E-02 | 9.91E-01 | 8.14E-02 |
| 620.06922 | 279.54 | 15.41 | 15.47 | 15.17 | 15.85 | 2.83E-01 | 9.98E-01 | 8.83E-01 | 5.64E-01 | 8.17E-01 | 6.91E-01 | 2.05E-01 |
| 620.12502 | 284.79 | 16.35 | 18.87 | 18.83 | 17.85 | 1.00E-16 | 1.05E-13 | 1.27E-13 | 1.21E-05 | 9.99E-01 | 8.02E-03 | 1.18E-02 |
| 620.15164 | 280.62 | 13.48 | 14.48 | 14.28 | 14.44 | 1.28E-01 | 1.59E-01 | 3.28E-01 | 2.04E-01 | 9.78E-01 | 1.00E+00 | 9.89E-01 |
| 620.15852 | 70.64  | 12.99 | 15.77 | 11.84 | 15.62 | 1.62E-10 | 7.20E-05 | 2.49E-01 | 3.04E-04 | 1.97E-08 | 9.96E-01 | 1.47E-07 |
| 620.19813 | 279.48 | 15.78 | 14.77 | 14.83 | 15.21 | 4.98E-03 | 7.92E-03 | 1.22E-02 | 2.77E-01 | 9.98E-01 | 5.64E-01 | 6.58E-01 |
| 620.32582 | 279.48 | 15.49 | 16.36 | 15.80 | 16.78 | 5.12E-02 | 2.72E-01 | 9.12E-01 | 4.70E-02 | 6.72E-01 | 8.43E-01 | 2.18E-01 |
| 620.39082 | 276.32 | 13.19 | 15.85 | 15.48 | 14.94 | 1.38E-07 | 2.95E-07 | 1.01E-05 | 2.00E-03 | 8.73E-01 | 2.68E-01 | 6.94E-01 |
| 620.39562 | 50.16  | 13.24 | 13.16 | 13.61 | 11.88 | 2.94E-04 | 9.97E-01 | 7.72E-01 | 4.03E-03 | 6.69E-01 | 1.08E-02 | 1.80E-04 |
| 620.44053 | 38.37  | 16.67 | 12.08 | 12.49 | 13.57 | 4.32E-30 | 3.67E-14 | 4.45E-14 | 1.39E-13 | 6.82E-01 | 8.30E-04 | 2.72E-02 |
| 620.45108 | 277.62 | 16.44 | 15.75 | 15.32 | 15.81 | 3.83E-02 | 2.86E-01 | 1.97E-02 | 3.88E-01 | 6.94E-01 | 9.99E-01 | 6.22E-01 |
| 620.51604 | 279.24 | 16.55 | 15.65 | 15.06 | 15.72 | 2.80E-03 | 1.05E-01 | 9.90E-04 | 1.72E-01 | 4.60E-01 | 9.98E-01 | 3.82E-01 |
| 620.53392 | 46.71  | 17.89 | 17.30 | 17.34 | 17.42 | 5.28E-02 | 7.07E-02 | 9.40E-02 | 2.33E-01 | 9.99E-01 | 9.64E-01 | 9.86E-01 |
| 620.57761 | 278.43 | 15.86 | 15.43 | 14.83 | 15.57 | 6.85E-02 | 6.96E-01 | 4.13E-02 | 8.91E-01 | 4.33E-01 | 9.87E-01 | 2.70E-01 |
| 620.5792  | 46.14  | 13.48 | 11.59 | 11.61 | 11.78 | 6.17E-09 | 2.88E-07 | 2.97E-07 | 8.04E-06 | 1.00E+00 | 9.53E-01 | 9.65E-01 |
| 620.65872 | 279.94 | 13.85 | 14.04 | 14.34 | 14.41 | 5.55E-01 | 9.72E-01 | 6.63E-01 | 5.91E-01 | 9.04E-01 | 8.51E-01 | 9.99E-01 |
| 620.66692 | 46.56  | 14.95 | 18.31 | 18.32 | 18.11 | 4.94E-22 | 7.42E-14 | 7.36E-14 | 8.14E-14 | 1.00E+00 | 9.55E-01 | 9.42E-01 |
| 620.7609  | 47.1   | 12.76 | 16.02 | 16.47 | 16.79 | 3.92E-18 | 3.66E-11 | 1.20E-13 | 7.72E-14 | 7.61E-01 | 3.74E-01 | 9.09E-01 |

|           |        |       |       |       |       |          |          |          |          |          |          |          |
|-----------|--------|-------|-------|-------|-------|----------|----------|----------|----------|----------|----------|----------|
| 620.819   | 279.6  | 16.75 | 18.00 | 17.84 | 17.54 | 1.23E-03 | 1.43E-03 | 6.64E-03 | 1.01E-01 | 9.67E-01 | 5.73E-01 | 8.33E-01 |
| 620.87944 | 54.6   | 17.79 | 15.41 | 15.93 | 14.17 | 1.49E-09 | 3.69E-05 | 1.75E-03 | 3.93E-10 | 7.64E-01 | 1.05E-01 | 7.13E-03 |
| 620.90838 | 270.92 | 14.17 | 13.70 | 12.58 | 13.96 | 6.89E-02 | 8.79E-01 | 5.65E-02 | 9.88E-01 | 3.11E-01 | 9.81E-01 | 1.64E-01 |
| 620.94151 | 52.15  | 18.85 | 17.74 | 18.64 | 17.35 | 8.77E-11 | 1.04E-05 | 7.82E-01 | 3.13E-09 | 7.77E-04 | 3.46E-01 | 7.40E-07 |
| 620.94166 | 277.63 | 14.51 | 17.04 | 17.32 | 16.40 | 7.53E-11 | 2.74E-08 | 4.49E-10 | 8.51E-05 | 9.12E-01 | 4.60E-01 | 1.49E-01 |
| 620.98858 | 279.92 | 15.67 | 16.06 | 15.91 | 15.45 | 4.76E-01 | 7.53E-01 | 9.27E-01 | 9.45E-01 | 9.82E-01 | 4.52E-01 | 6.75E-01 |
| 621.06872 | 279.71 | 17.15 | 24.79 | 24.66 | 23.30 | 2.04E-44 | 3.65E-14 | 3.65E-14 | 3.70E-14 | 9.93E-01 | 1.83E-02 | 3.66E-02 |
| 621.1936  | 280.96 | 17.62 | 26.09 | 26.02 | 24.58 | 2.05E-46 | 3.65E-14 | 3.65E-14 | 3.65E-14 | 9.99E-01 | 3.12E-02 | 4.14E-02 |
| 621.31826 | 280.29 | 17.64 | 26.60 | 26.52 | 25.06 | 3.66E-46 | 3.65E-14 | 3.65E-14 | 3.65E-14 | 9.99E-01 | 4.31E-02 | 5.65E-02 |
| 621.44338 | 281.79 | 17.90 | 26.43 | 26.41 | 24.73 | 5.36E-47 | 3.65E-14 | 3.65E-14 | 3.65E-14 | 1.00E+00 | 1.11E-02 | 1.15E-02 |
| 621.56891 | 281.43 | 17.40 | 26.03 | 25.95 | 24.50 | 1.03E-47 | 3.65E-14 | 3.65E-14 | 3.65E-14 | 9.99E-01 | 2.84E-02 | 4.01E-02 |
| 621.6942  | 279.73 | 17.12 | 25.37 | 25.26 | 23.91 | 6.53E-46 | 3.65E-14 | 3.65E-14 | 3.65E-14 | 9.96E-01 | 3.41E-02 | 5.62E-02 |
| 621.81951 | 280.17 | 16.67 | 24.39 | 24.28 | 23.07 | 4.93E-45 | 3.65E-14 | 3.65E-14 | 3.65E-14 | 9.96E-01 | 4.88E-02 | 8.03E-02 |
| 621.87225 | 50.44  | 15.05 | 15.76 | 16.15 | 14.74 | 2.44E-02 | 4.63E-01 | 1.04E-01 | 9.26E-01 | 8.62E-01 | 1.99E-01 | 3.15E-02 |
| 621.94259 | 52.42  | 15.47 | 13.70 | 14.07 | 12.27 | 1.17E-07 | 3.03E-03 | 2.75E-02 | 1.71E-08 | 8.93E-01 | 3.86E-02 | 4.39E-03 |
| 621.94458 | 281.15 | 15.84 | 22.67 | 22.56 | 21.79 | 1.10E-37 | 3.65E-14 | 3.65E-14 | 4.12E-14 | 9.97E-01 | 3.28E-01 | 4.34E-01 |
| 622.03709 | 281.17 | 16.23 | 15.28 | 14.85 | 15.11 | 1.30E-02 | 1.43E-01 | 1.03E-02 | 7.09E-02 | 7.81E-01 | 9.85E-01 | 9.42E-01 |
| 622.0702  | 279.5  | 16.63 | 22.13 | 22.03 | 20.74 | 6.89E-45 | 3.65E-14 | 3.65E-14 | 4.10E-14 | 9.91E-01 | 8.19E-04 | 2.11E-03 |
| 622.19541 | 280.44 | 15.64 | 20.60 | 20.54 | 19.50 | 3.17E-37 | 3.65E-14 | 3.65E-14 | 7.01E-14 | 9.99E-01 | 1.95E-02 | 2.72E-02 |
| 622.32066 | 279.38 | 16.93 | 19.08 | 19.08 | 18.51 | 1.71E-10 | 8.08E-09 | 5.39E-09 | 5.47E-05 | 1.00E+00 | 3.93E-01 | 3.78E-01 |
| 622.4456  | 279.48 | 15.75 | 17.16 | 16.55 | 16.56 | 1.29E-02 | 5.51E-03 | 2.23E-01 | 2.46E-01 | 5.01E-01 | 5.38E-01 | 1.00E+00 |
| 622.5341  | 47.28  | 17.25 | 17.67 | 17.57 | 17.16 | 1.05E-01 | 2.66E-01 | 4.87E-01 | 9.82E-01 | 9.78E-01 | 1.62E-01 | 3.22E-01 |
| 622.57679 | 277.22 | 16.21 | 15.07 | 15.58 | 15.41 | 6.01E-02 | 3.80E-02 | 4.35E-01 | 2.60E-01 | 6.45E-01 | 8.70E-01 | 9.82E-01 |
| 622.57741 | 45.45  | 12.42 | 12.91 | 13.47 | 12.98 | 5.41E-01 | 9.00E-01 | 4.49E-01 | 8.71E-01 | 8.72E-01 | 1.00E+00 | 9.14E-01 |
| 622.62207 | 46.95  | 16.06 | 17.47 | 17.48 | 17.08 | 3.05E-08 | 5.68E-07 | 3.56E-07 | 7.89E-04 | 1.00E+00 | 4.69E-01 | 4.39E-01 |
| 622.67057 | 47.88  | 11.59 | 15.56 | 15.56 | 15.93 | 2.89E-27 | 7.21E-14 | 7.21E-14 | 5.76E-14 | 1.00E+00 | 7.92E-01 | 7.91E-01 |
| 622.75519 | 48.82  | 13.21 | 16.76 | 16.96 | 17.32 | 1.54E-38 | 3.67E-14 | 3.65E-14 | 3.65E-14 | 8.93E-01 | 2.41E-01 | 6.26E-01 |
| 622.82651 | 279.38 | 16.52 | 14.66 | 14.52 | 15.56 | 2.65E-05 | 2.90E-04 | 6.78E-05 | 1.61E-01 | 9.90E-01 | 2.37E-01 | 1.28E-01 |
| 622.93851 | 53.02  | 17.14 | 16.74 | 17.61 | 15.49 | 2.48E-08 | 5.99E-01 | 4.57E-01 | 7.13E-06 | 4.40E-02 | 1.75E-03 | 1.13E-08 |
| 622.94133 | 279.65 | 15.31 | 14.73 | 15.12 | 15.45 | 3.58E-01 | 4.78E-01 | 9.64E-01 | 9.86E-01 | 7.82E-01 | 3.31E-01 | 8.61E-01 |
| 623.06816 | 281.3  | 16.29 | 18.32 | 17.88 | 17.71 | 6.13E-06 | 5.51E-06 | 5.23E-04 | 3.77E-03 | 7.06E-01 | 4.83E-01 | 9.79E-01 |
| 623.19259 | 281.02 | 15.84 | 19.34 | 19.10 | 18.19 | 9.52E-20 | 7.58E-14 | 7.45E-14 | 1.41E-08 | 9.18E-01 | 1.77E-02 | 8.78E-02 |
| 623.31804 | 279.41 | 16.20 | 19.60 | 19.37 | 18.58 | 2.74E-21 | 7.32E-14 | 7.45E-14 | 6.17E-10 | 9.05E-01 | 2.58E-02 | 1.28E-01 |
| 623.44183 | 281.42 | 15.74 | 19.63 | 19.34 | 18.67 | 3.69E-19 | 7.38E-14 | 7.98E-14 | 5.13E-10 | 9.08E-01 | 1.34E-01 | 4.18E-01 |
| 623.50752 | 50.59  | 16.00 | 13.64 | 14.90 | 16.47 | 1.99E-06 | 6.37E-05 | 1.49E-01 | 8.21E-01 | 9.12E-02 | 4.45E-06 | 2.45E-02 |
| 623.56844 | 281.2  | 15.08 | 19.15 | 18.97 | 17.93 | 4.35E-31 | 3.67E-14 | 3.81E-14 | 8.39E-14 | 9.44E-01 | 2.28E-03 | 1.25E-02 |
| 623.69339 | 281.48 | 16.21 | 18.40 | 18.08 | 17.79 | 2.87E-09 | 9.68E-09 | 9.13E-07 | 8.21E-05 | 8.03E-01 | 3.59E-01 | 8.67E-01 |
| 623.75234 | 49.52  | 13.23 | 14.88 | 15.27 | 14.88 | 3.25E-07 | 9.50E-05 | 6.19E-07 | 1.62E-04 | 7.40E-01 | 1.00E+00 | 7.46E-01 |
| 623.81899 | 280.08 | 15.31 | 15.19 | 15.39 | 15.45 | 8.01E-01 | 9.72E-01 | 9.89E-01 | 9.47E-01 | 8.83E-01 | 7.79E-01 | 9.95E-01 |
| 623.86968 | 50.76  | 14.84 | 13.22 | 14.25 | 13.21 | 5.87E-03 | 1.50E-02 | 6.78E-01 | 1.76E-02 | 2.47E-01 | 1.00E+00 | 2.57E-01 |
| 623.89497 | 270.84 | 15.54 | 14.89 | 15.46 | 15.56 | 3.48E-02 | 5.00E-02 | 9.88E-01 | 1.00E+00 | 1.24E-01 | 6.09E-02 | 9.82E-01 |
| 623.94487 | 52.32  | 15.39 | 15.64 | 16.65 | 14.58 | 5.97E-05 | 9.29E-01 | 1.16E-02 | 2.14E-01 | 7.91E-02 | 6.97E-02 | 1.55E-05 |
| 623.94699 | 281.25 | 14.65 | 14.93 | 14.80 | 15.06 | 8.75E-01 | 9.44E-01 | 9.91E-01 | 8.57E-01 | 9.94E-01 | 9.95E-01 | 9.60E-01 |
| 624.03557 | 276.28 | 16.26 | 18.52 | 18.62 | 18.58 | 3.44E-10 | 1.55E-07 | 3.39E-08 | 1.69E-07 | 9.96E-01 | 9.99E-01 | 1.00E+00 |
| 624.06678 | 61.54  | 13.21 | 11.45 | 13.46 | 10.76 | 1.05E-04 | 3.92E-02 | 9.82E-01 | 1.94E-03 | 1.67E-02 | 7.53E-01 | 7.03E-04 |
| 624.07203 | 280.25 | 16.28 | 14.55 | 14.76 | 14.80 | 1.40E-03 | 2.52E-03 | 1.01E-02 | 1.77E-02 | 9.72E-01 | 9.61E-01 | 1.00E+00 |
| 624.0943  | 264.48 | 11.89 | 16.11 | 16.60 | 15.78 | 9.47E-15 | 1.01E-10 | 4.80E-13 | 6.29E-09 | 8.50E-01 | 9.53E-01 | 5.51E-01 |
| 624.17914 | 276.36 | 16.45 | 18.77 | 18.87 | 18.21 | 1.49E-09 | 9.43E-08 | 1.76E-08 | 1.26E-04 | 9.94E-01 | 5.41E-01 | 3.85E-01 |
| 624.3223  | 276.59 | 16.89 | 18.62 | 18.43 | 18.48 | 1.73E-06 | 1.18E-05 | 1.13E-04 | 1.16E-04 | 9.48E-01 | 9.80E-01 | 9.99E-01 |
| 624.41588 | 281.94 | 16.25 | 14.18 | 13.48 | 14.99 | 1.59E-06 | 4.66E-04 | 8.72E-07 | 8.18E-02 | 5.43E-01 | 4.53E-01 | 2.92E-02 |
| 624.46442 | 275.42 | 16.89 | 17.85 | 18.08 | 17.57 | 1.05E-02 | 5.19E-02 | 7.91E-03 | 2.87E-01 | 9.31E-01 | 8.94E-01 | 5.61E-01 |
| 624.52846 | 47.3   | 16.93 | 17.05 | 17.01 | 17.43 | 3.13E-01 | 9.73E-01 | 9.91E-01 | 2.74E-01 | 9.99E-01 | 5.38E-01 | 4.49E-01 |
| 624.53851 | 281.81 | 14.23 | 15.23 | 14.39 | 16.15 | 4.43E-02 | 5.03E-01 | 9.96E-01 | 4.65E-02 | 6.62E-01 | 6.16E-01 | 9.12E-02 |
| 624.57331 | 44.74  | 13.41 | 12.15 | 12.16 | 12.66 | 2.15E-01 | 2.56E-01 | 2.56E-01 | 7.11E-01 | 1.00E+00 | 8.94E-01 | 8.97E-01 |
| 624.61251 | 273.03 | 13.98 | 14.57 | 15.07 | 15.24 | 1.49E-01 | 7.48E-01 | 2.43E-01 | 1.57E-01 | 8.39E-01 | 6.99E-01 | 9.92E-01 |
| 624.61761 | 46.7   | 17.94 | 18.69 | 18.71 | 18.57 | 6.97E-09 | 2.93E-07 | 1.38E-07 | 4.30E-05 | 1.00E+00 | 8.14E-01 | 7.62E-01 |
| 624.75017 | 49.67  | 10.83 | 16.88 | 17.21 | 16.77 | 1.76E-42 | 3.65E-14 | 3.65E-14 | 3.65E-14 | 8.68E-01 | 9.95E-01 | 7.56E-01 |
| 624.75128 | 275.2  | 16.06 | 15.20 | 15.59 | 15.92 | 1.70E-01 | 1.49E-01 | 6.41E-01 | 9.88E-01 | 7.88E-01 | 3.35E-01 | 8.59E-01 |
| 624.82172 | 278.03 | 15.67 | 14.57 | 14.47 | 15.21 | 1.33E-02 | 4.17E-02 | 1.91E-02 | 6.92E-01 | 9.95E-01 | 4.71E-01 | 3.27E-01 |
| 624.94433 | 52.56  | 13.53 | 13.94 | 14.81 | 12.66 | 4.46E-04 | 8.26E-01 | 3.63E-02 | 2.87E-01 | 2.85E-01 | 5.74E-02 | 1.54E-04 |
| 624.94627 | 277.56 | 16.15 | 14.72 | 14.58 | 15.00 | 2.83E-05 | 3.63E-04 | 5.77E-05 | 8.77E-03 | 9.79E-01 | 8.71E-01 | 6.58E-01 |
| 625.03841 | 270.43 | 16.95 | 14.95 | 15.13 | 15.71 | 5.64E-05 | 1.08E-04 | 4.58E-04 | 4.40E-02 | 9.80E-01 | 3.93E-01 | 6.17E-01 |
| 625.08027 | 283.76 | 16.71 | 15.03 | 15.13 | 15.67 | 9.96E-03 | 1.41E-02 | 2.21E-02 | 2.60E-01 | 9.98E-01 | 6.95E-01 | 7.89E-01 |
| 625.12124 | 284.38 | 17.09 | 15.06 | 15.39 | 15.98 | 3.69E-04 | 3.68E-04 | 3.70E-03 | 1.32E-01 | 9.18E-01 | 3.07E-01 | 6.74E-01 |
| 625.16335 | 283.42 | 16.28 | 15.46 | 15.31 | 15.89 | 3.16E-01 | 4.67E-01 | 3.12E-01 | 9.07E-01 | 9.94E-01 | 8.89E-01 | 7.67E-01 |
| 625.2045  | 283.57 | 17.07 | 15.47 | 15.35 | 16.28 | 1.86E-03 | 8.05E-03 | 3.01E-03 | 4.13E-01 | 9.94E-01 | 4.14E-01 | 2.74E-01 |
| 625.24681 | 283.69 | 17.06 | 15.23 | 15.04 | 15.85 | 5.43E-04 | 3.17E-03 | 7.27E-04 | 1.09E-01 | 9.84E-01 | 6.88E-01 | 4.61E-01 |
| 625.2872  | 283.29 | 16.64 | 14.94 | 14.52 | 15.27 | 2.08E-03 | 1.94E-02 | 1.51E-03 | 9.97E-02 | 8.88E-01 | 9.51E-01 | 6.00E-01 |

|           |        |       |       |       |       |          |          |          |          |          |          |          |
|-----------|--------|-------|-------|-------|-------|----------|----------|----------|----------|----------|----------|----------|
| 625.31552 | 281.67 | 15.31 | 14.29 | 14.76 | 14.78 | 1.32E-04 | 2.94E-05 | 5.56E-02 | 8.39E-02 | 1.54E-01 | 1.52E-01 | 1.00E+00 |
| 625.32769 | 282.17 | 17.16 | 15.04 | 15.26 | 15.87 | 8.22E-06 | 1.64E-05 | 1.25E-04 | 2.46E-02 | 9.59E-01 | 2.84E-01 | 5.56E-01 |
| 625.41354 | 50.5   | 12.30 | 11.63 | 10.51 | 13.31 | 2.41E-06 | 5.14E-01 | 1.63E-03 | 1.89E-01 | 1.22E-01 | 7.37E-03 | 8.59E-07 |
| 625.61776 | 48.27  | 11.24 | 12.09 | 12.42 | 11.63 | 5.13E-02 | 2.31E-01 | 4.06E-02 | 8.28E-01 | 8.87E-01 | 7.70E-01 | 3.36E-01 |
| 625.74999 | 46.71  | 10.22 | 12.66 | 13.52 | 12.19 | 1.14E-08 | 2.72E-05 | 5.07E-09 | 1.56E-03 | 3.71E-01 | 8.28E-01 | 7.29E-02 |
| 625.81073 | 279.1  | 15.72 | 17.90 | 17.98 | 16.98 | 2.88E-13 | 9.65E-11 | 1.12E-11 | 4.93E-04 | 9.92E-01 | 2.58E-02 | 1.05E-02 |
| 625.83877 | 52.98  | 14.26 | 12.17 | 12.23 | 12.89 | 1.38E-03 | 2.95E-03 | 3.55E-03 | 1.12E-01 | 1.00E+00 | 6.67E-01 | 7.11E-01 |
| 625.90992 | 279.15 | 15.05 | 13.79 | 13.00 | 13.69 | 6.58E-03 | 1.45E-01 | 3.09E-03 | 1.14E-01 | 5.62E-01 | 9.99E-01 | 6.84E-01 |
| 625.93631 | 277.35 | 15.64 | 19.07 | 18.96 | 17.96 | 2.78E-32 | 3.65E-14 | 3.70E-14 | 9.49E-14 | 9.74E-01 | 5.81E-04 | 2.36E-03 |
| 626.06045 | 279.39 | 15.26 | 19.47 | 19.58 | 18.30 | 2.78E-31 | 3.76E-14 | 3.67E-14 | 8.34E-14 | 9.89E-01 | 8.14E-03 | 2.64E-03 |
| 626.08009 | 56.46  | 16.15 | 18.15 | 16.85 | 18.84 | 1.46E-05 | 2.32E-03 | 5.86E-01 | 2.82E-05 | 1.07E-01 | 6.53E-01 | 4.55E-03 |
| 626.18705 | 277.26 | 16.09 | 19.54 | 19.54 | 18.59 | 4.32E-33 | 3.65E-14 | 3.65E-14 | 7.38E-14 | 1.00E+00 | 4.88E-03 | 4.58E-03 |
| 626.31733 | 279.07 | 16.80 | 19.10 | 19.36 | 18.54 | 3.39E-13 | 5.26E-10 | 3.53E-12 | 6.49E-06 | 8.75E-01 | 3.94E-01 | 9.54E-01 |
| 626.4377  | 279.03 | 15.94 | 18.49 | 18.59 | 17.87 | 1.40E-25 | 6.87E-14 | 5.65E-14 | 1.60E-12 | 9.77E-01 | 7.15E-02 | 2.33E-02 |
| 626.48063 | 46.41  | 16.20 | 15.23 | 14.82 | 15.15 | 7.21E-04 | 2.86E-02 | 4.87E-04 | 1.78E-02 | 6.62E-01 | 9.96E-01 | 8.12E-01 |
| 626.51803 | 51.16  | 14.91 | 18.30 | 18.30 | 17.44 | 2.57E-23 | 7.25E-14 | 7.32E-14 | 1.71E-11 | 1.00E+00 | 7.15E-02 | 7.02E-02 |
| 626.5634  | 278.76 | 15.59 | 17.58 | 17.41 | 16.83 | 1.75E-09 | 1.15E-08 | 1.46E-07 | 1.09E-03 | 9.54E-01 | 1.16E-01 | 3.00E-01 |
| 626.61572 | 46.91  | 17.14 | 18.48 | 18.34 | 18.18 | 1.02E-07 | 5.20E-07 | 6.13E-06 | 2.21E-04 | 9.48E-01 | 6.57E-01 | 9.22E-01 |
| 626.66206 | 46.92  | 10.20 | 11.77 | 13.17 | 12.10 | 1.41E-06 | 1.75E-02 | 2.94E-07 | 3.20E-03 | 5.26E-02 | 9.36E-01 | 2.25E-01 |
| 626.69074 | 278.43 | 12.01 | 14.62 | 15.07 | 15.06 | 5.56E-09 | 1.16E-05 | 1.38E-07 | 4.41E-07 | 8.38E-01 | 8.62E-01 | 1.00E+00 |
| 626.69875 | 45.69  | 15.14 | 18.68 | 18.42 | 18.76 | 8.23E-35 | 3.67E-14 | 3.90E-14 | 3.67E-14 | 7.93E-01 | 9.93E-01 | 6.44E-01 |
| 626.74719 | 47.2   | 12.41 | 16.95 | 16.66 | 16.05 | 1.01E-40 | 3.65E-14 | 3.65E-14 | 3.94E-14 | 7.76E-01 | 2.50E-02 | 2.15E-01 |
| 626.81755 | 277.25 | 13.98 | 14.62 | 15.14 | 14.97 | 2.94E-02 | 4.07E-01 | 2.54E-02 | 9.35E-02 | 6.11E-01 | 8.57E-01 | 9.79E-01 |
| 626.9498  | 52.25  | 19.89 | 21.73 | 21.85 | 20.28 | 1.93E-12 | 1.40E-08 | 1.05E-09 | 5.88E-01 | 9.79E-01 | 3.23E-05 | 4.70E-06 |
| 627.12205 | 57.92  | 14.15 | 17.37 | 17.36 | 16.65 | 1.43E-24 | 6.98E-14 | 6.85E-14 | 7.33E-13 | 1.00E+00 | 1.15E-01 | 1.21E-01 |
| 627.20023 | 279.53 | 15.13 | 18.29 | 18.22 | 17.64 | 2.67E-22 | 7.27E-14 | 7.41E-14 | 3.06E-12 | 9.96E-01 | 2.17E-01 | 3.06E-01 |
| 627.47142 | 28     | 13.06 | 13.86 | 13.68 | 12.96 | 5.06E-01 | 6.51E-01 | 7.99E-01 | 9.99E-01 | 9.94E-01 | 6.00E-01 | 7.46E-01 |
| 627.51384 | 53.64  | 11.12 | 16.10 | 16.41 | 14.22 | 2.08E-15 | 2.93E-12 | 1.71E-13 | 3.22E-05 | 9.68E-01 | 3.28E-02 | 8.08E-03 |
| 627.5349  | 22.71  | 16.36 | 7.15  | 6.75  | 11.35 | 3.13E-43 | 3.65E-14 | 3.65E-14 | 3.05E-13 | 9.13E-01 | 2.04E-09 | 3.58E-11 |
| 627.61118 | 48.62  | 13.55 | 12.86 | 12.81 | 12.58 | 9.49E-03 | 9.50E-02 | 5.70E-02 | 8.50E-03 | 9.98E-01 | 8.02E-01 | 8.83E-01 |
| 627.66551 | 278.96 | 13.73 | 14.86 | 14.81 | 13.69 | 5.39E-03 | 4.18E-02 | 5.35E-02 | 1.00E+00 | 9.99E-01 | 4.77E-02 | 6.03E-02 |
| 627.69855 | 46.11  | 10.23 | 12.22 | 12.72 | 14.14 | 1.90E-14 | 5.06E-05 | 1.56E-07 | 7.76E-14 | 6.68E-01 | 2.56E-04 | 1.18E-02 |
| 627.82214 | 48.36  | 16.39 | 17.78 | 17.54 | 17.29 | 1.32E-06 | 1.53E-06 | 9.27E-05 | 5.59E-03 | 7.93E-01 | 2.78E-01 | 7.99E-01 |
| 627.83149 | 278.42 | 15.58 | 15.50 | 15.63 | 15.27 | 7.68E-01 | 9.95E-01 | 9.99E-01 | 8.10E-01 | 9.82E-01 | 9.23E-01 | 7.52E-01 |
| 627.95042 | 52.88  | 16.60 | 18.46 | 18.64 | 17.13 | 2.46E-13 | 2.72E-09 | 4.73E-11 | 2.67E-01 | 9.26E-01 | 9.83E-05 | 5.71E-06 |
| 628.07584 | 279.7  | 14.04 | 14.87 | 14.49 | 15.03 | 2.21E-01 | 3.48E-01 | 8.03E-01 | 2.20E-01 | 8.78E-01 | 9.91E-01 | 7.32E-01 |
| 628.13945 | 194.74 | 6.33  | 10.53 | 13.29 | 9.53  | 1.12E-23 | 7.40E-11 | 3.92E-14 | 1.63E-06 | 4.51E-05 | 3.73E-01 | 2.85E-08 |
| 628.20329 | 281.25 | 14.88 | 13.73 | 14.87 | 14.90 | 5.56E-03 | 1.33E-02 | 1.00E+00 | 1.00E+00 | 1.80E-02 | 1.83E-02 | 1.00E+00 |
| 628.2933  | 106.38 | 8.04  | 12.19 | 12.55 | 12.53 | 5.15E-18 | 1.78E-12 | 9.13E-14 | 2.04E-13 | 9.15E-01 | 9.34E-01 | 1.00E+00 |
| 628.32852 | 278.91 | 15.99 | 15.00 | 14.91 | 15.39 | 9.45E-03 | 2.60E-02 | 1.14E-02 | 3.32E-01 | 9.95E-01 | 7.29E-01 | 5.77E-01 |
| 628.47804 | 46.47  | 16.97 | 16.47 | 16.15 | 16.18 | 1.57E-02 | 2.98E-01 | 2.03E-02 | 3.62E-02 | 6.87E-01 | 7.67E-01 | 1.00E+00 |
| 628.53537 | 38.63  | 14.82 | 7.16  | 7.82  | 9.47  | 2.14E-38 | 3.65E-14 | 3.65E-14 | 7.26E-14 | 5.86E-01 | 1.77E-04 | 1.32E-02 |
| 628.56818 | 46.55  | 15.20 | 16.18 | 15.97 | 15.79 | 1.30E-03 | 9.14E-04 | 1.40E-02 | 1.12E-01 | 8.49E-01 | 4.75E-01 | 9.11E-01 |
| 628.61616 | 54.5   | 16.10 | 17.28 | 17.25 | 17.03 | 1.14E-10 | 4.34E-09 | 8.57E-09 | 1.00E-05 | 9.98E-01 | 5.54E-01 | 6.57E-01 |
| 628.69764 | 46.1   | 15.47 | 18.63 | 18.46 | 18.81 | 2.81E-41 | 3.65E-14 | 3.65E-14 | 3.65E-14 | 8.84E-01 | 8.56E-01 | 4.28E-01 |
| 628.94616 | 52.56  | 17.46 | 19.31 | 19.52 | 18.14 | 9.98E-15 | 2.04E-10 | 9.45E-13 | 6.40E-02 | 8.50E-01 | 2.47E-04 | 6.89E-06 |
| 629.32699 | 278.42 | 15.97 | 14.47 | 14.84 | 15.30 | 1.19E-04 | 7.71E-05 | 4.59E-03 | 2.13E-01 | 7.05E-01 | 9.50E-02 | 5.65E-01 |
| 629.51842 | 53.52  | 14.32 | 18.89 | 18.10 | 16.73 | 2.34E-15 | 8.57E-14 | 7.06E-11 | 9.75E-05 | 4.75E-01 | 9.72E-04 | 7.06E-02 |
| 629.60776 | 48.42  | 12.56 | 11.51 | 11.74 | 11.02 | 1.33E-03 | 3.26E-02 | 1.33E-01 | 6.32E-04 | 9.38E-01 | 6.14E-01 | 2.77E-01 |
| 629.69815 | 48.84  | 12.70 | 15.18 | 15.40 | 15.23 | 2.03E-22 | 7.43E-14 | 7.25E-14 | 7.38E-14 | 8.61E-01 | 9.99E-01 | 9.26E-01 |
| 629.81604 | 48.93  | 16.18 | 16.14 | 16.36 | 15.73 | 3.21E-01 | 9.99E-01 | 9.47E-01 | 5.23E-01 | 9.11E-01 | 6.32E-01 | 2.53E-01 |
| 629.94909 | 52.64  | 11.77 | 12.81 | 12.35 | 12.03 | 1.25E-01 | 9.23E-02 | 5.51E-01 | 9.38E-01 | 7.45E-01 | 3.55E-01 | 9.05E-01 |
| 630.01972 | 53.48  | 11.41 | 16.69 | 15.04 | 14.71 | 9.70E-20 | 7.12E-14 | 4.36E-11 | 7.38E-09 | 9.24E-03 | 1.58E-03 | 9.23E-01 |
| 630.08188 | 302.09 | 16.58 | 16.86 | 16.54 | 15.04 | 2.22E-04 | 9.07E-01 | 1.00E+00 | 1.98E-03 | 8.77E-01 | 2.71E-04 | 3.61E-03 |
| 630.31903 | 44.02  | 8.68  | 8.00  | 10.67 | 9.53  | 3.28E-07 | 4.54E-01 | 1.00E-04 | 2.77E-01 | 2.36E-07 | 1.04E-02 | 8.19E-02 |
| 630.33072 | 280.37 | 15.63 | 14.52 | 14.86 | 15.32 | 1.07E-02 | 8.69E-03 | 1.18E-01 | 8.18E-01 | 7.71E-01 | 1.35E-01 | 5.97E-01 |
| 630.42403 | 45.13  | 17.03 | 9.47  | 9.84  | 9.96  | 3.98E-49 | 3.65E-14 | 3.65E-14 | 3.65E-14 | 8.46E-01 | 7.20E-01 | 9.94E-01 |
| 630.4751  | 46.51  | 16.57 | 15.92 | 15.20 | 15.47 | 4.69E-03 | 3.64E-01 | 3.44E-03 | 3.94E-02 | 2.92E-01 | 7.16E-01 | 9.13E-01 |
| 630.51569 | 47.9   | 14.89 | 17.69 | 15.67 | 14.58 | 1.42E-04 | 5.84E-04 | 6.81E-01 | 9.73E-01 | 2.93E-02 | 2.69E-04 | 4.56E-01 |
| 630.56536 | 46.88  | 16.91 | 18.08 | 18.05 | 17.54 | 1.23E-09 | 2.43E-08 | 4.55E-08 | 8.02E-03 | 9.98E-01 | 4.07E-02 | 5.91E-02 |
| 630.6977  | 47.09  | 13.92 | 16.87 | 16.62 | 17.24 | 7.13E-25 | 7.49E-14 | 7.41E-14 | 6.43E-14 | 8.48E-01 | 6.56E-01 | 2.07E-01 |
| 630.70104 | 272.6  | 13.78 | 14.93 | 15.40 | 15.14 | 5.82E-04 | 2.95E-02 | 5.55E-04 | 7.94E-03 | 6.75E-01 | 9.61E-01 | 9.32E-01 |
| 630.78857 | 47.12  | 11.44 | 13.68 | 15.14 | 15.05 | 1.33E-12 | 1.13E-04 | 3.64E-11 | 4.30E-10 | 3.08E-02 | 6.01E-02 | 9.98E-01 |
| 630.90206 | 271.97 | 15.67 | 15.14 | 15.39 | 15.71 | 3.18E-01 | 3.77E-01 | 8.28E-01 | 1.00E+00 | 8.80E-01 | 3.71E-01 | 8.01E-01 |
| 631.01576 | 54.2   | 11.48 | 11.86 | 10.74 | 11.57 | 1.09E-01 | 8.45E-01 | 3.51E-01 | 9.98E-01 | 8.00E-02 | 9.30E-01 | 3.10E-01 |
| 631.06531 | 290.44 | 16.11 | 14.64 | 15.26 | 15.07 | 1.42E-03 | 6.61E-04 | 1.05E-01 | 3.70E-02 | 3.66E-01 | 6.97E-01 | 9.62E-01 |
| 631.10267 | 274.48 | 14.99 | 13.29 | 14.50 | 14.35 | 2.63E-03 | 1.07E-03 | 6.92E-01 | 5.10E-01 | 4.27E-02 | 1.14E-01 | 9.89E-01 |
| 631.11342 | 44.12  | 14.52 | 13.18 | 14.10 | 14.25 | 7.20E-02 | 5.07E-02 | 8.48E-01 | 9.58E-01 | 3.08E-01 | 2.10E-01 | 9.93E-01 |

|           |        |       |       |       |       |          |          |          |          |          |          |          |
|-----------|--------|-------|-------|-------|-------|----------|----------|----------|----------|----------|----------|----------|
| 631.1491  | 289.83 | 16.13 | 15.24 | 17.19 | 16.00 | 1.89E-10 | 3.67E-03 | 2.89E-04 | 9.61E-01 | 1.97E-11 | 2.93E-02 | 1.06E-04 |
| 631.31887 | 281.39 | 14.56 | 14.30 | 14.72 | 14.99 | 2.44E-01 | 8.59E-01 | 9.58E-01 | 5.59E-01 | 5.89E-01 | 1.86E-01 | 8.54E-01 |
| 631.69064 | 49.23  | 10.65 | 10.86 | 11.33 | 10.56 | 1.61E-02 | 8.35E-01 | 3.19E-02 | 9.87E-01 | 2.55E-01 | 6.79E-01 | 1.97E-02 |
| 631.78527 | 49.35  | 13.39 | 13.75 | 14.68 | 13.98 | 7.60E-04 | 6.77E-01 | 2.97E-04 | 2.68E-01 | 2.12E-02 | 8.96E-01 | 1.50E-01 |
| 631.81307 | 49.78  | 13.31 | 12.99 | 12.10 | 10.68 | 6.69E-04 | 9.61E-01 | 2.34E-01 | 5.65E-04 | 5.31E-01 | 4.67E-03 | 1.58E-01 |
| 631.90196 | 53.48  | 17.18 | 16.63 | 17.15 | 14.23 | 1.30E-08 | 6.74E-01 | 1.00E+00 | 7.55E-08 | 7.24E-01 | 3.11E-05 | 1.99E-07 |
| 632.10616 | 98.81  | 11.10 | 10.72 | 11.60 | 10.12 | 6.88E-02 | 8.98E-01 | 7.78E-01 | 2.89E-01 | 3.81E-01 | 7.14E-01 | 4.50E-02 |
| 632.13083 | 230.56 | 7.54  | 12.68 | 13.86 | 13.45 | 1.49E-32 | 6.85E-14 | 3.65E-14 | 4.10E-14 | 8.79E-02 | 4.40E-01 | 8.58E-01 |
| 632.3332  | 280.04 | 15.95 | 14.62 | 14.72 | 15.45 | 5.22E-04 | 1.34E-03 | 3.25E-03 | 5.13E-01 | 9.93E-01 | 1.28E-01 | 2.13E-01 |
| 632.41481 | 40.21  | 19.18 | 18.19 | 15.36 | 17.07 | 2.63E-27 | 6.80E-03 | 3.67E-14 | 5.99E-10 | 7.47E-14 | 3.16E-03 | 1.11E-06 |
| 632.47316 | 46.65  | 14.75 | 13.83 | 12.63 | 12.60 | 3.97E-04 | 3.76E-01 | 1.38E-03 | 1.78E-03 | 1.77E-01 | 1.80E-01 | 1.00E+00 |
| 632.52467 | 22.72  | 17.07 | 8.86  | 10.15 | 11.38 | 1.96E-34 | 3.65E-14 | 3.85E-14 | 7.45E-14 | 1.36E-01 | 3.30E-04 | 1.82E-01 |
| 632.56321 | 47.12  | 16.95 | 18.12 | 18.08 | 17.63 | 2.19E-10 | 4.66E-09 | 1.13E-08 | 1.80E-03 | 9.96E-01 | 5.85E-02 | 9.25E-02 |
| 632.60276 | 44.96  | 13.00 | 14.20 | 14.89 | 13.52 | 6.37E-03 | 1.40E-01 | 4.20E-03 | 8.02E-01 | 6.28E-01 | 6.54E-01 | 9.27E-02 |
| 632.65128 | 47.2   | 16.51 | 17.55 | 17.62 | 17.31 | 1.81E-08 | 9.69E-07 | 1.10E-07 | 3.71E-04 | 9.83E-01 | 6.53E-01 | 4.23E-01 |
| 632.78598 | 47.8   | 10.00 | 13.01 | 14.07 | 14.11 | 1.07E-13 | 6.94E-07 | 1.13E-11 | 3.48E-11 | 2.43E-01 | 2.39E-01 | 1.00E+00 |
| 632.91372 | 29.61  | 12.84 | 16.63 | 13.68 | 14.43 | 1.39E-13 | 1.30E-13 | 2.45E-01 | 4.39E-03 | 8.54E-09 | 4.92E-05 | 4.02E-01 |
| 633.02589 | 89.38  | 15.66 | 11.77 | 13.74 | 13.39 | 1.68E-08 | 2.12E-09 | 6.83E-03 | 1.36E-03 | 7.15E-03 | 5.03E-02 | 9.42E-01 |
| 633.15397 | 71.87  | 14.99 | 15.98 | 16.55 | 13.70 | 2.50E-08 | 1.16E-01 | 2.55E-03 | 2.69E-02 | 5.91E-01 | 1.41E-05 | 2.62E-08 |
| 633.33098 | 279.05 | 15.85 | 14.58 | 14.55 | 15.21 | 1.52E-04 | 7.38E-04 | 4.48E-04 | 2.20E-01 | 1.00E+00 | 2.69E-01 | 2.24E-01 |
| 633.41397 | 33.51  | 14.93 | 20.48 | 18.58 | 19.11 | 1.18E-50 | 3.65E-14 | 3.65E-14 | 3.65E-14 | 1.63E-09 | 4.12E-05 | 2.70E-01 |
| 633.52814 | 22.27  | 15.57 | 7.56  | 8.69  | 9.58  | 8.34E-40 | 3.65E-14 | 3.65E-14 | 4.94E-14 | 1.43E-01 | 1.50E-03 | 3.54E-01 |
| 633.7816  | 49.62  | 11.65 | 14.44 | 15.19 | 14.70 | 1.62E-18 | 2.97E-11 | 7.43E-14 | 1.61E-12 | 2.21E-01 | 9.15E-01 | 6.16E-01 |
| 633.9212  | 28     | 13.89 | 19.82 | 17.77 | 18.52 | 1.03E-56 | 3.65E-14 | 3.65E-14 | 3.65E-14 | 3.26E-11 | 7.54E-05 | 4.73E-02 |
| 634.3335  | 279.15 | 15.71 | 15.51 | 15.20 | 15.49 | 5.74E-01 | 9.43E-01 | 4.86E-01 | 9.30E-01 | 8.41E-01 | 1.00E+00 | 8.76E-01 |
| 634.4202  | 38.6   | 19.30 | 18.15 | 15.31 | 16.92 | 1.01E-18 | 2.26E-02 | 7.44E-14 | 1.51E-07 | 3.21E-10 | 2.23E-02 | 9.73E-04 |
| 634.50161 | 278.3  | 13.58 | 14.61 | 14.63 | 14.74 | 9.20E-03 | 4.17E-02 | 3.22E-02 | 1.95E-02 | 1.00E+00 | 9.88E-01 | 9.93E-01 |
| 634.50363 | 55.35  | 14.07 | 15.80 | 16.86 | 15.09 | 4.94E-09 | 3.32E-04 | 1.27E-09 | 8.82E-02 | 7.32E-02 | 3.87E-01 | 5.40E-04 |
| 634.54008 | 21.26  | 19.29 | 12.88 | 14.41 | 15.12 | 9.69E-40 | 3.65E-14 | 3.70E-14 | 7.09E-14 | 1.14E-03 | 1.13E-06 | 3.08E-01 |
| 634.56132 | 46.96  | 14.60 | 17.22 | 17.06 | 16.31 | 9.13E-09 | 7.11E-08 | 3.51E-07 | 1.22E-03 | 9.85E-01 | 2.11E-01 | 3.70E-01 |
| 634.60025 | 44.74  | 13.11 | 13.28 | 13.79 | 12.97 | 5.09E-01 | 9.90E-01 | 6.02E-01 | 9.95E-01 | 8.07E-01 | 9.51E-01 | 4.93E-01 |
| 634.63802 | 45.54  | 13.66 | 13.00 | 12.33 | 11.81 | 4.86E-03 | 5.86E-01 | 5.19E-02 | 3.89E-03 | 5.92E-01 | 1.45E-01 | 7.88E-01 |
| 634.64832 | 47.22  | 16.84 | 18.52 | 18.58 | 18.42 | 1.17E-32 | 3.85E-14 | 3.67E-14 | 5.61E-14 | 9.79E-01 | 9.09E-01 | 7.15E-01 |
| 634.7741  | 50.11  | 11.10 | 12.81 | 12.88 | 12.06 | 4.18E-05 | 2.70E-04 | 1.22E-04 | 1.11E-01 | 9.99E-01 | 3.08E-01 | 2.33E-01 |
| 634.93588 | 51.61  | 14.26 | 16.39 | 16.86 | 15.58 | 8.94E-11 | 2.06E-07 | 1.48E-10 | 3.67E-03 | 6.15E-01 | 1.72E-01 | 7.00E-03 |
| 635.1007  | 292.02 | 11.19 | 17.57 | 17.74 | 15.51 | 3.90E-30 | 3.94E-14 | 3.72E-14 | 9.90E-13 | 9.90E-01 | 1.87E-03 | 5.51E-04 |
| 635.14159 | 267.57 | 15.91 | 16.01 | 17.17 | 16.29 | 1.32E-03 | 9.91E-01 | 1.37E-03 | 6.85E-01 | 5.73E-03 | 8.56E-01 | 7.32E-02 |
| 635.16855 | 81.82  | 11.67 | 15.31 | 15.06 | 12.70 | 2.65E-07 | 4.61E-06 | 1.93E-05 | 5.05E-01 | 9.85E-01 | 3.66E-03 | 1.02E-02 |
| 635.33812 | 278.41 | 16.44 | 14.41 | 14.71 | 15.26 | 2.62E-08 | 5.40E-08 | 3.37E-06 | 4.41E-03 | 8.30E-01 | 9.03E-02 | 4.17E-01 |
| 635.49796 | 53.75  | 12.20 | 12.25 | 12.87 | 12.18 | 3.05E-01 | 1.00E+00 | 3.60E-01 | 1.00E+00 | 4.54E-01 | 9.99E-01 | 3.84E-01 |
| 635.54346 | 21.74  | 17.61 | 9.33  | 11.61 | 12.77 | 7.31E-34 | 3.65E-14 | 6.41E-14 | 1.09E-13 | 5.65E-04 | 1.50E-07 | 2.06E-01 |
| 635.93674 | 52.56  | 12.73 | 14.01 | 14.16 | 11.30 | 1.49E-06 | 8.48E-02 | 3.99E-02 | 5.04E-02 | 9.93E-01 | 2.17E-05 | 5.47E-06 |
| 636.0845  | 302.39 | 14.76 | 18.69 | 17.77 | 17.00 | 6.83E-25 | 4.10E-14 | 7.45E-14 | 2.06E-09 | 3.70E-02 | 1.77E-05 | 1.27E-01 |
| 636.10471 | 293.42 | 14.91 | 14.15 | 14.46 | 13.68 | 8.02E-03 | 1.40E-01 | 5.85E-01 | 4.20E-03 | 8.18E-01 | 5.78E-01 | 1.43E-01 |
| 636.14459 | 226.26 | 9.74  | 14.33 | 14.01 | 14.45 | 5.13E-16 | 1.81E-12 | 3.26E-11 | 1.86E-12 | 9.50E-01 | 9.98E-01 | 8.92E-01 |
| 636.33687 | 279.76 | 15.81 | 14.61 | 14.89 | 15.34 | 3.18E-03 | 2.61E-03 | 3.14E-02 | 5.21E-01 | 8.56E-01 | 1.80E-01 | 5.84E-01 |
| 636.41646 | 44.33  | 18.96 | 13.96 | 13.66 | 14.80 | 1.26E-17 | 1.71E-13 | 7.70E-14 | 1.21E-09 | 9.65E-01 | 5.55E-01 | 2.82E-01 |
| 636.51158 | 46.77  | 16.53 | 16.96 | 16.77 | 16.64 | 4.04E-01 | 3.44E-01 | 7.79E-01 | 9.73E-01 | 8.93E-01 | 6.54E-01 | 9.64E-01 |
| 636.55941 | 40.3   | 18.12 | 13.83 | 13.63 | 14.92 | 1.37E-26 | 6.38E-14 | 4.74E-14 | 1.00E-12 | 9.65E-01 | 7.73E-02 | 1.19E-02 |
| 636.64679 | 47.43  | 14.96 | 17.97 | 18.05 | 17.62 | 4.22E-19 | 8.05E-14 | 7.42E-14 | 9.71E-12 | 9.95E-01 | 4.84E-01 | 6.41E-01 |
| 636.73738 | 47.93  | 10.54 | 16.15 | 16.20 | 16.62 | 1.66E-23 | 7.52E-14 | 7.36E-14 | 7.32E-14 | 1.00E+00 | 8.82E-01 | 9.11E-01 |
| 636.85617 | 53.38  | 15.76 | 13.42 | 13.88 | 13.59 | 7.57E-06 | 2.75E-05 | 1.05E-03 | 1.94E-04 | 8.02E-01 | 9.88E-01 | 9.46E-01 |
| 636.91552 | 52.23  | 17.92 | 14.76 | 16.28 | 13.70 | 1.76E-11 | 3.86E-07 | 1.95E-02 | 3.37E-11 | 4.48E-02 | 2.87E-01 | 1.18E-04 |
| 637.08615 | 301.84 | 14.59 | 15.31 | 13.42 | 13.24 | 1.02E-03 | 5.63E-01 | 1.53E-01 | 8.95E-02 | 5.95E-03 | 3.03E-03 | 9.90E-01 |
| 637.15656 | 64.28  | 15.34 | 19.09 | 17.18 | 17.18 | 7.09E-09 | 6.40E-10 | 5.03E-03 | 7.34E-03 | 4.87E-03 | 7.05E-03 | 1.00E+00 |
| 637.3348  | 280.44 | 16.40 | 15.40 | 15.33 | 15.85 | 3.38E-02 | 6.76E-02 | 4.13E-02 | 5.52E-01 | 9.98E-01 | 7.18E-01 | 6.14E-01 |
| 637.50542 | 53.32  | 15.64 | 18.31 | 18.46 | 17.13 | 8.81E-29 | 4.94E-14 | 3.85E-14 | 1.96E-08 | 9.25E-01 | 2.25E-05 | 1.08E-06 |
| 637.55963 | 24.12  | 16.78 | 7.16  | 7.60  | 9.42  | 1.10E-56 | 3.65E-14 | 3.65E-14 | 3.65E-14 | 8.18E-01 | 9.86E-05 | 2.33E-03 |
| 637.62079 | 286.37 | 14.44 | 13.69 | 14.53 | 13.13 | 1.08E-02 | 3.46E-01 | 9.98E-01 | 2.71E-02 | 2.74E-01 | 6.54E-01 | 1.95E-02 |
| 637.64472 | 52.37  | 10.89 | 12.01 | 12.23 | 12.60 | 8.27E-03 | 1.33E-01 | 4.32E-02 | 7.23E-03 | 9.73E-01 | 6.92E-01 | 9.04E-01 |
| 637.73332 | 49.31  | 12.75 | 11.60 | 11.93 | 11.96 | 6.16E-05 | 3.49E-05 | 5.11E-03 | 1.07E-02 | 5.73E-01 | 5.30E-01 | 1.00E+00 |
| 637.74611 | 48.17  | 7.87  | 8.95  | 8.36  | 10.34 | 6.56E-04 | 2.56E-01 | 8.36E-01 | 3.38E-04 | 7.56E-01 | 1.18E-01 | 8.09E-03 |
| 637.74642 | 281.23 | 15.35 | 14.41 | 14.76 | 14.78 | 2.23E-02 | 1.15E-02 | 2.03E-01 | 2.63E-01 | 6.73E-01 | 6.53E-01 | 1.00E+00 |
| 637.85293 | 50.97  | 15.07 | 17.11 | 17.07 | 16.33 | 6.68E-14 | 6.39E-12 | 1.14E-11 | 5.20E-05 | 9.98E-01 | 3.43E-02 | 4.91E-02 |
| 637.95792 | 283.5  | 15.05 | 15.03 | 15.13 | 14.82 | 8.70E-01 | 1.00E+00 | 9.96E-01 | 9.23E-01 | 9.94E-01 | 9.43E-01 | 8.44E-01 |
| 638.00587 | 53.25  | 12.49 | 15.72 | 15.56 | 14.44 | 4.87E-13 | 1.91E-11 | 1.07E-10 | 1.22E-04 | 9.86E-01 | 3.21E-02 | 7.30E-02 |
| 638.07509 | 282.32 | 15.27 | 14.61 | 15.17 | 14.76 | 2.46E-01 | 2.88E-01 | 9.93E-01 | 5.29E-01 | 4.60E-01 | 9.84E-01 | 7.13E-01 |
| 638.15956 | 64.22  | 14.61 | 16.14 | 13.50 | 14.68 | 6.19E-06 | 8.22E-03 | 9.18E-02 | 9.99E-01 | 1.02E-06 | 2.25E-02 | 8.73E-02 |

|           |        |       |       |       |       |          |          |          |          |          |          |          |
|-----------|--------|-------|-------|-------|-------|----------|----------|----------|----------|----------|----------|----------|
| 638.30528 | 282    | 15.74 | 14.72 | 14.60 | 14.41 | 2.80E-04 | 1.06E-02 | 2.76E-03 | 5.49E-04 | 9.84E-01 | 8.07E-01 | 9.47E-01 |
| 638.33648 | 280.66 | 16.03 | 14.66 | 14.88 | 15.49 | 1.47E-03 | 1.87E-03 | 1.18E-02 | 5.10E-01 | 9.42E-01 | 1.56E-01 | 4.00E-01 |
| 638.34256 | 55.78  | 10.41 | 12.48 | 13.96 | 12.92 | 1.32E-08 | 1.39E-03 | 3.87E-09 | 9.81E-05 | 4.73E-02 | 8.79E-01 | 2.78E-01 |
| 638.41316 | 44.95  | 18.60 | 13.93 | 12.57 | 14.08 | 2.26E-31 | 7.24E-14 | 3.65E-14 | 7.38E-14 | 1.79E-02 | 9.90E-01 | 8.68E-03 |
| 638.45919 | 282.14 | 15.99 | 15.02 | 15.01 | 14.71 | 6.95E-03 | 5.59E-02 | 5.04E-02 | 7.19E-03 | 1.00E+00 | 8.77E-01 | 8.81E-01 |
| 638.50831 | 49.19  | 16.81 | 18.78 | 18.92 | 17.87 | 1.04E-09 | 1.19E-07 | 9.34E-09 | 1.32E-02 | 9.77E-01 | 5.72E-02 | 1.81E-02 |
| 638.59747 | 46.75  | 15.02 | 16.97 | 16.99 | 16.38 | 1.23E-10 | 6.64E-09 | 3.10E-09 | 1.38E-04 | 1.00E+00 | 2.64E-01 | 2.25E-01 |
| 638.60927 | 284.84 | 15.22 | 14.07 | 12.62 | 13.93 | 7.28E-04 | 2.48E-01 | 1.86E-04 | 1.78E-01 | 1.03E-01 | 9.96E-01 | 1.85E-01 |
| 638.64615 | 47.81  | 13.37 | 15.69 | 15.65 | 16.08 | 1.06E-18 | 6.31E-13 | 8.11E-13 | 7.36E-14 | 9.99E-01 | 5.91E-01 | 5.12E-01 |
| 638.72039 | 49.51  | 12.35 | 12.96 | 13.18 | 12.56 | 1.15E-01 | 3.44E-01 | 1.10E-01 | 9.41E-01 | 9.43E-01 | 7.37E-01 | 3.93E-01 |
| 638.73189 | 48.32  | 13.28 | 16.97 | 16.99 | 17.11 | 2.19E-45 | 3.65E-14 | 3.65E-14 | 3.65E-14 | 1.00E+00 | 9.56E-01 | 9.68E-01 |
| 638.84575 | 284.04 | 15.43 | 14.39 | 14.62 | 14.33 | 3.71E-02 | 6.62E-02 | 2.11E-01 | 5.49E-02 | 9.50E-01 | 9.99E-01 | 9.13E-01 |
| 638.85314 | 55.48  | 14.05 | 13.38 | 14.15 | 13.57 | 2.78E-01 | 4.42E-01 | 9.96E-01 | 7.22E-01 | 3.34E-01 | 9.79E-01 | 6.00E-01 |
| 638.91476 | 44.42  | 16.16 | 15.29 | 14.57 | 13.66 | 4.84E-07 | 1.80E-01 | 1.23E-03 | 2.12E-07 | 3.50E-01 | 2.04E-03 | 1.78E-01 |
| 639.09662 | 272.35 | 9.62  | 15.95 | 17.10 | 15.05 | 3.23E-31 | 5.54E-14 | 3.65E-14 | 7.34E-14 | 1.99E-01 | 4.40E-01 | 3.84E-03 |
| 639.33933 | 279.29 | 15.38 | 15.03 | 15.02 | 14.84 | 5.50E-01 | 7.96E-01 | 7.73E-01 | 4.92E-01 | 1.00E+00 | 9.58E-01 | 9.64E-01 |
| 639.43215 | 284.74 | 14.30 | 14.19 | 13.36 | 13.49 | 1.71E-01 | 9.96E-01 | 2.44E-01 | 4.06E-01 | 3.83E-01 | 5.62E-01 | 9.95E-01 |
| 639.49421 | 33.06  | 17.33 | 9.40  | 10.77 | 11.82 | 1.68E-33 | 3.65E-14 | 4.19E-14 | 7.29E-14 | 8.86E-02 | 4.26E-04 | 2.88E-01 |
| 639.54508 | 284.48 | 15.68 | 14.90 | 15.16 | 14.82 | 4.70E-02 | 8.61E-02 | 3.83E-01 | 5.70E-02 | 8.68E-01 | 9.96E-01 | 7.64E-01 |
| 639.65473 | 283.81 | 15.45 | 14.08 | 14.41 | 14.19 | 4.39E-04 | 7.95E-04 | 1.76E-02 | 3.42E-03 | 7.94E-01 | 9.91E-01 | 9.32E-01 |
| 639.68721 | 280.91 | 15.68 | 15.35 | 15.29 | 15.37 | 5.49E-01 | 6.82E-01 | 5.48E-01 | 7.29E-01 | 9.97E-01 | 1.00E+00 | 9.95E-01 |
| 639.72633 | 49.41  | 12.53 | 13.05 | 13.09 | 12.76 | 1.96E-01 | 2.94E-01 | 2.20E-01 | 8.70E-01 | 9.99E-01 | 7.93E-01 | 7.09E-01 |
| 639.75192 | 277.98 | 14.77 | 13.96 | 13.80 | 14.39 | 2.94E-02 | 9.85E-02 | 2.94E-02 | 7.09E-01 | 9.72E-01 | 6.60E-01 | 3.89E-01 |
| 639.76338 | 281.26 | 15.88 | 16.25 | 15.95 | 16.07 | 8.27E-01 | 8.04E-01 | 9.98E-01 | 9.69E-01 | 8.93E-01 | 9.77E-01 | 9.92E-01 |
| 639.83353 | 278.84 | 15.95 | 16.57 | 16.14 | 16.47 | 4.11E-01 | 4.18E-01 | 9.64E-01 | 6.07E-01 | 7.27E-01 | 9.94E-01 | 8.75E-01 |
| 639.8502  | 50.62  | 14.55 | 17.32 | 17.28 | 16.82 | 2.35E-26 | 6.03E-14 | 6.03E-14 | 7.64E-14 | 9.99E-01 | 2.45E-01 | 3.02E-01 |
| 639.90331 | 278.89 | 16.23 | 17.16 | 16.75 | 16.38 | 4.88E-02 | 4.13E-02 | 4.32E-01 | 9.75E-01 | 6.67E-01 | 1.55E-01 | 7.42E-01 |
| 639.95427 | 53.18  | 14.62 | 17.12 | 14.88 | 15.71 | 5.30E-05 | 5.66E-05 | 9.65E-01 | 2.23E-01 | 5.72E-04 | 7.66E-02 | 4.83E-01 |
| 639.97482 | 278.39 | 15.89 | 16.68 | 16.48 | 16.17 | 7.23E-02 | 6.15E-02 | 2.35E-01 | 8.24E-01 | 9.25E-01 | 4.21E-01 | 7.84E-01 |
| 640.03896 | 62.64  | 12.18 | 11.58 | 12.39 | 11.81 | 3.24E-01 | 5.59E-01 | 9.68E-01 | 8.59E-01 | 3.16E-01 | 9.66E-01 | 6.25E-01 |
| 640.04606 | 278.01 | 14.52 | 16.44 | 15.92 | 16.09 | 1.29E-03 | 1.22E-03 | 3.11E-02 | 1.61E-02 | 7.50E-01 | 9.15E-01 | 9.89E-01 |
| 640.12164 | 278.62 | 15.84 | 14.84 | 15.25 | 15.64 | 4.90E-03 | 3.83E-03 | 1.69E-01 | 9.12E-01 | 5.21E-01 | 4.70E-02 | 5.64E-01 |
| 640.19336 | 240.22 | 12.64 | 16.48 | 17.24 | 15.12 | 4.38E-19 | 2.91E-13 | 7.42E-14 | 4.13E-06 | 4.01E-01 | 3.69E-02 | 1.83E-04 |
| 640.33062 | 279.72 | 15.52 | 14.84 | 14.85 | 15.38 | 8.48E-02 | 1.64E-01 | 1.67E-01 | 9.77E-01 | 1.00E+00 | 4.03E-01 | 4.10E-01 |
| 640.38895 | 51.83  | 12.05 | 13.92 | 13.22 | 13.29 | 1.85E-03 | 8.26E-04 | 7.04E-02 | 6.16E-02 | 4.98E-01 | 6.13E-01 | 9.99E-01 |
| 640.41062 | 45.03  | 17.29 | 9.87  | 9.42  | 10.54 | 7.46E-48 | 3.65E-14 | 3.65E-14 | 3.65E-14 | 7.82E-01 | 5.17E-01 | 9.99E-02 |
| 640.45421 | 46.92  | 16.36 | 12.32 | 10.16 | 12.90 | 5.89E-19 | 1.21E-09 | 7.09E-14 | 4.44E-07 | 3.34E-03 | 8.03E-01 | 1.45E-04 |
| 640.50568 | 48.44  | 17.76 | 19.48 | 18.82 | 18.65 | 9.55E-08 | 1.65E-08 | 8.66E-04 | 1.13E-02 | 9.59E-02 | 2.52E-02 | 9.32E-01 |
| 640.59445 | 46.93  | 16.62 | 18.38 | 18.41 | 17.84 | 2.54E-15 | 1.16E-12 | 3.96E-13 | 1.56E-06 | 9.99E-01 | 1.11E-01 | 8.14E-02 |
| 640.60717 | 280.03 | 12.32 | 13.93 | 12.29 | 13.03 | 1.12E-01 | 1.35E-01 | 1.00E+00 | 7.85E-01 | 1.41E-01 | 6.66E-01 | 7.79E-01 |
| 640.63379 | 44.64  | 12.65 | 13.24 | 14.14 | 12.86 | 2.30E-02 | 6.50E-01 | 1.70E-02 | 9.76E-01 | 3.05E-01 | 8.98E-01 | 7.97E-02 |
| 640.69538 | 244.9  | 11.64 | 15.05 | 15.19 | 13.29 | 1.07E-05 | 1.10E-04 | 4.36E-05 | 1.66E-01 | 9.98E-01 | 1.48E-01 | 9.92E-02 |
| 640.72446 | 49.14  | 14.15 | 16.92 | 17.24 | 16.67 | 1.65E-28 | 6.47E-14 | 3.87E-14 | 7.23E-14 | 6.19E-01 | 7.94E-01 | 1.53E-01 |
| 640.8213  | 52.12  | 11.89 | 11.40 | 11.08 | 13.54 | 1.22E-03 | 8.56E-01 | 5.38E-01 | 4.63E-02 | 9.54E-01 | 6.38E-03 | 9.77E-04 |
| 640.89934 | 29.41  | 12.24 | 14.21 | 13.89 | 14.34 | 6.11E-07 | 1.36E-05 | 3.26E-04 | 5.62E-06 | 8.70E-01 | 9.90E-01 | 7.17E-01 |
| 640.90696 | 40.2   | 13.58 | 14.26 | 14.08 | 15.13 | 6.73E-05 | 1.36E-01 | 3.70E-01 | 1.59E-05 | 9.47E-01 | 4.55E-02 | 9.01E-03 |
| 640.95254 | 53.29  | 14.19 | 16.05 | 13.70 | 14.99 | 7.90E-05 | 1.85E-03 | 7.68E-01 | 4.15E-01 | 6.48E-05 | 2.09E-01 | 7.64E-02 |
| 641.0133  | 53.46  | 11.87 | 15.70 | 14.13 | 13.99 | 4.23E-10 | 5.08E-11 | 1.53E-04 | 7.68E-04 | 2.17E-02 | 1.37E-02 | 9.94E-01 |
| 641.19456 | 239.16 | 8.32  | 11.92 | 12.42 | 11.59 | 1.72E-09 | 7.26E-07 | 9.88E-09 | 1.43E-05 | 8.78E-01 | 9.65E-01 | 6.24E-01 |
| 641.33674 | 280.49 | 16.02 | 14.39 | 14.65 | 15.09 | 3.11E-03 | 2.95E-03 | 1.62E-02 | 2.10E-01 | 9.49E-01 | 4.81E-01 | 7.95E-01 |
| 641.38629 | 51.85  | 11.82 | 12.78 | 12.79 | 12.72 | 7.72E-02 | 1.32E-01 | 1.22E-01 | 1.94E-01 | 1.00E+00 | 9.99E-01 | 9.99E-01 |
| 641.40558 | 28.35  | 15.18 | 16.86 | 14.61 | 16.11 | 7.60E-09 | 1.91E-05 | 3.60E-01 | 5.27E-02 | 1.26E-08 | 1.83E-01 | 4.01E-04 |
| 641.51073 | 38.09  | 17.98 | 17.62 | 16.89 | 17.66 | 6.25E-03 | 6.66E-01 | 2.91E-03 | 7.54E-01 | 1.03E-01 | 9.99E-01 | 8.96E-02 |
| 641.7243  | 49.18  | 7.93  | 11.81 | 12.40 | 11.15 | 6.19E-18 | 6.40E-13 | 7.55E-14 | 4.70E-09 | 6.36E-01 | 5.77E-01 | 7.15E-02 |
| 641.81147 | 50.6   | 12.19 | 11.33 | 11.94 | 11.55 | 2.70E-01 | 2.57E-01 | 9.49E-01 | 5.32E-01 | 5.80E-01 | 9.73E-01 | 8.50E-01 |
| 641.84821 | 50.76  | 12.74 | 14.27 | 13.93 | 14.05 | 2.11E-04 | 3.09E-04 | 7.73E-03 | 3.91E-03 | 8.05E-01 | 9.43E-01 | 9.90E-01 |
| 641.90746 | 29.91  | 14.23 | 14.45 | 13.46 | 14.61 | 1.21E-02 | 9.30E-01 | 1.28E-01 | 7.38E-01 | 3.58E-02 | 9.75E-01 | 1.28E-02 |
| 642.00586 | 53.75  | 10.91 | 11.37 | 11.07 | 11.49 | 5.65E-01 | 7.26E-01 | 9.83E-01 | 5.79E-01 | 9.13E-01 | 9.94E-01 | 8.05E-01 |
| 642.1939  | 277.19 | 16.13 | 15.60 | 15.39 | 15.44 | 1.01E-01 | 3.85E-01 | 1.11E-01 | 1.74E-01 | 9.22E-01 | 9.63E-01 | 9.99E-01 |
| 642.33484 | 277.98 | 16.37 | 18.05 | 17.66 | 17.59 | 1.06E-04 | 8.70E-05 | 4.00E-03 | 1.08E-02 | 7.45E-01 | 6.55E-01 | 9.98E-01 |
| 642.4515  | 44.18  | 17.78 | 15.09 | 14.04 | 15.22 | 3.10E-08 | 8.65E-05 | 1.58E-08 | 3.31E-04 | 3.38E-01 | 9.97E-01 | 2.56E-01 |
| 642.48184 | 274.92 | 15.13 | 15.66 | 15.57 | 15.55 | 4.06E-01 | 4.06E-01 | 5.59E-01 | 6.18E-01 | 9.94E-01 | 9.91E-01 | 1.00E+00 |
| 642.49223 | 50.27  | 14.82 | 12.55 | 13.52 | 13.65 | 2.82E-06 | 4.81E-07 | 8.44E-03 | 2.89E-02 | 9.59E-02 | 5.70E-02 | 9.91E-01 |
| 642.51176 | 36.24  | 17.07 | 13.36 | 13.79 | 14.76 | 1.98E-14 | 3.24E-13 | 5.38E-11 | 1.05E-05 | 7.94E-01 | 2.30E-02 | 1.91E-01 |
| 642.58036 | 45.08  | 13.32 | 11.87 | 12.64 | 13.64 | 8.51E-05 | 1.19E-03 | 2.82E-01 | 8.48E-01 | 2.10E-01 | 1.22E-04 | 6.54E-02 |
| 642.5925  | 46.82  | 16.78 | 18.23 | 18.17 | 18.02 | 2.96E-14 | 6.86E-12 | 2.83E-11 | 1.02E-08 | 9.91E-01 | 7.29E-01 | 8.75E-01 |
| 642.59654 | 280.95 | 13.67 | 14.83 | 14.88 | 15.07 | 1.43E-01 | 3.02E-01 | 2.57E-01 | 1.70E-01 | 1.00E+00 | 9.86E-01 | 9.93E-01 |
| 642.62552 | 274.45 | 15.15 | 14.94 | 14.92 | 15.33 | 5.90E-01 | 9.16E-01 | 8.91E-01 | 9.46E-01 | 1.00E+00 | 6.61E-01 | 6.18E-01 |

|           |        |       |       |       |       |          |          |          |          |          |          |          |
|-----------|--------|-------|-------|-------|-------|----------|----------|----------|----------|----------|----------|----------|
| 642.63052 | 44.53  | 14.11 | 15.25 | 15.67 | 15.11 | 3.41E-05 | 3.38E-03 | 1.60E-05 | 1.74E-02 | 5.87E-01 | 9.77E-01 | 3.57E-01 |
| 642.66933 | 45.18  | 11.28 | 11.04 | 11.01 | 12.85 | 6.03E-04 | 9.56E-01 | 9.40E-01 | 6.85E-03 | 1.00E+00 | 1.85E-03 | 1.36E-03 |
| 642.6821  | 47.55  | 15.44 | 17.26 | 17.19 | 17.36 | 1.43E-20 | 7.55E-14 | 8.12E-14 | 7.52E-14 | 9.91E-01 | 9.61E-01 | 8.63E-01 |
| 642.71947 | 48.81  | 14.04 | 15.78 | 16.29 | 14.07 | 6.16E-07 | 1.65E-03 | 1.71E-05 | 1.00E+00 | 7.20E-01 | 4.03E-03 | 7.04E-05 |
| 642.76509 | 273.94 | 14.51 | 15.31 | 15.60 | 15.49 | 5.86E-03 | 8.34E-02 | 7.06E-03 | 2.51E-02 | 8.42E-01 | 9.58E-01 | 9.91E-01 |
| 642.81164 | 51.04  | 10.65 | 13.34 | 13.21 | 14.38 | 2.26E-11 | 9.52E-07 | 2.51E-06 | 2.86E-11 | 9.95E-01 | 2.01E-01 | 1.19E-01 |
| 642.91057 | 277.75 | 15.65 | 15.11 | 14.38 | 14.78 | 6.34E-02 | 6.74E-01 | 4.07E-02 | 2.97E-01 | 4.51E-01 | 9.19E-01 | 8.55E-01 |
| 642.92257 | 51.39  | 19.25 | 19.90 | 20.65 | 18.84 | 1.12E-10 | 4.51E-02 | 2.53E-07 | 3.82E-01 | 1.97E-02 | 4.41E-04 | 2.89E-10 |
| 643.09535 | 58.04  | 11.01 | 11.41 | 11.80 | 12.21 | 8.63E-02 | 8.25E-01 | 3.25E-01 | 6.55E-02 | 8.52E-01 | 3.85E-01 | 8.45E-01 |
| 643.33725 | 279.7  | 16.29 | 14.53 | 14.98 | 15.40 | 1.14E-09 | 6.67E-10 | 4.48E-06 | 5.20E-03 | 3.32E-01 | 9.97E-03 | 4.22E-01 |
| 643.33943 | 52.52  | 12.01 | 12.79 | 13.33 | 13.36 | 2.32E-03 | 2.02E-01 | 4.98E-03 | 5.67E-03 | 5.46E-01 | 5.25E-01 | 1.00E+00 |
| 643.52921 | 22.87  | 17.74 | 12.88 | 14.50 | 15.03 | 1.63E-23 | 4.19E-14 | 7.87E-13 | 5.98E-09 | 1.03E-03 | 1.10E-05 | 6.11E-01 |
| 643.78939 | 50.04  | 15.47 | 9.95  | 9.89  | 10.31 | 2.05E-24 | 7.31E-14 | 7.25E-14 | 7.28E-14 | 1.00E+00 | 9.26E-01 | 8.84E-01 |
| 643.92491 | 52.35  | 15.23 | 15.60 | 16.46 | 13.98 | 9.06E-05 | 8.81E-01 | 6.61E-02 | 7.17E-02 | 3.40E-01 | 1.28E-02 | 2.38E-05 |
| 644.05355 | 277.47 | 15.09 | 14.12 | 14.32 | 14.63 | 1.43E-01 | 1.22E-01 | 2.94E-01 | 7.38E-01 | 9.68E-01 | 6.88E-01 | 9.10E-01 |
| 644.3369  | 279.21 | 16.13 | 14.48 | 14.85 | 15.38 | 2.63E-07 | 2.30E-07 | 7.54E-05 | 5.65E-02 | 5.98E-01 | 2.02E-02 | 3.12E-01 |
| 644.4497  | 45.49  | 18.59 | 16.40 | 15.68 | 16.03 | 1.90E-11 | 1.94E-06 | 1.22E-10 | 4.48E-08 | 3.31E-01 | 8.29E-01 | 8.59E-01 |
| 644.46024 | 46.67  | 13.20 | 11.35 | 11.62 | 11.76 | 6.17E-05 | 1.05E-04 | 1.14E-03 | 5.72E-03 | 9.24E-01 | 7.93E-01 | 9.89E-01 |
| 644.53968 | 38.72  | 16.54 | 15.35 | 14.93 | 15.78 | 6.22E-04 | 1.65E-02 | 3.27E-04 | 2.44E-01 | 7.16E-01 | 7.45E-01 | 1.74E-01 |
| 644.58072 | 45.23  | 11.23 | 12.21 | 12.64 | 12.50 | 5.45E-05 | 1.37E-02 | 8.15E-05 | 8.51E-04 | 5.48E-01 | 8.23E-01 | 9.75E-01 |
| 644.59046 | 46.88  | 14.97 | 17.11 | 16.99 | 16.89 | 1.23E-13 | 2.55E-11 | 2.05E-10 | 5.49E-09 | 9.77E-01 | 8.89E-01 | 9.88E-01 |
| 644.63174 | 44.65  | 11.08 | 13.03 | 13.85 | 12.72 | 2.62E-05 | 3.84E-03 | 9.83E-06 | 2.72E-02 | 4.99E-01 | 9.54E-01 | 2.33E-01 |
| 644.67861 | 47.46  | 15.41 | 17.90 | 17.91 | 17.92 | 1.01E-32 | 3.87E-14 | 3.76E-14 | 4.10E-14 | 1.00E+00 | 1.00E+00 | 1.00E+00 |
| 644.80252 | 50.59  | 11.76 | 12.48 | 13.01 | 12.76 | 3.94E-04 | 8.21E-02 | 2.64E-04 | 7.78E-03 | 3.31E-01 | 8.19E-01 | 8.68E-01 |
| 644.91948 | 52.23  | 17.00 | 17.71 | 18.49 | 16.40 | 2.80E-10 | 6.76E-02 | 2.72E-06 | 1.79E-01 | 4.64E-02 | 1.48E-04 | 3.40E-10 |
| 645.33891 | 280.84 | 15.96 | 14.60 | 15.12 | 15.34 | 5.16E-04 | 1.69E-04 | 4.07E-02 | 2.36E-01 | 3.86E-01 | 1.26E-01 | 9.08E-01 |
| 645.42041 | 27.05  | 10.41 | 16.70 | 13.94 | 15.94 | 1.84E-34 | 3.65E-14 | 4.09E-13 | 3.83E-14 | 3.09E-08 | 3.64E-01 | 1.56E-04 |
| 645.49231 | 53.27  | 15.56 | 16.62 | 17.61 | 15.59 | 1.68E-13 | 7.36E-04 | 5.65E-12 | 9.99E-01 | 2.86E-03 | 2.54E-03 | 1.52E-10 |
| 645.54746 | 29.75  | 18.39 | 14.13 | 15.40 | 15.90 | 2.83E-15 | 7.57E-14 | 7.88E-09 | 4.51E-06 | 4.95E-02 | 3.15E-03 | 7.50E-01 |
| 645.66919 | 48.82  | 10.78 | 11.43 | 11.61 | 10.62 | 5.21E-02 | 3.82E-01 | 1.65E-01 | 9.80E-01 | 9.71E-01 | 2.37E-01 | 9.29E-02 |
| 645.8979  | 55.58  | 17.06 | 11.86 | 10.04 | 11.75 | 1.04E-25 | 7.58E-14 | 3.92E-14 | 7.76E-14 | 1.59E-02 | 9.98E-01 | 3.33E-02 |
| 645.90187 | 280.1  | 15.88 | 12.47 | 13.33 | 12.42 | 2.50E-06 | 1.89E-05 | 2.09E-03 | 2.38E-05 | 6.46E-01 | 1.00E+00 | 6.21E-01 |
| 645.91928 | 27.02  | 13.37 | 16.58 | 13.48 | 15.61 | 1.82E-24 | 7.11E-14 | 9.84E-01 | 1.52E-10 | 7.56E-14 | 1.77E-02 | 2.61E-09 |
| 645.93034 | 280.82 | 15.44 | 14.64 | 15.78 | 15.86 | 4.85E-02 | 3.02E-01 | 8.77E-01 | 8.05E-01 | 7.43E-02 | 5.92E-02 | 9.98E-01 |
| 645.99513 | 52.33  | 12.09 | 9.82  | 12.29 | 10.16 | 7.62E-06 | 5.38E-04 | 9.84E-01 | 6.36E-03 | 1.97E-04 | 9.41E-01 | 2.60E-03 |
| 646.06198 | 279.86 | 12.61 | 14.83 | 14.98 | 14.64 | 1.26E-04 | 1.15E-03 | 3.87E-04 | 4.97E-03 | 9.95E-01 | 9.90E-01 | 9.48E-01 |
| 646.19571 | 136.17 | 6.33  | 12.55 | 13.75 | 10.45 | 4.16E-52 | 3.65E-14 | 3.65E-14 | 6.98E-14 | 1.15E-02 | 2.31E-06 | 1.38E-13 |
| 646.2028  | 281.05 | 13.74 | 14.86 | 15.23 | 14.92 | 3.08E-03 | 4.20E-02 | 2.62E-03 | 3.67E-02 | 8.34E-01 | 9.99E-01 | 8.95E-01 |
| 646.33898 | 279.32 | 16.20 | 13.97 | 14.49 | 15.00 | 3.06E-11 | 2.66E-11 | 2.46E-07 | 9.14E-04 | 3.51E-01 | 8.66E-03 | 3.76E-01 |
| 646.42769 | 27.33  | 13.38 | 20.14 | 17.98 | 19.25 | 9.99E-69 | 3.65E-14 | 3.65E-14 | 3.65E-14 | 1.58E-12 | 1.16E-02 | 7.16E-05 |
| 646.44742 | 45.61  | 18.45 | 15.20 | 15.28 | 15.34 | 1.18E-14 | 1.43E-11 | 2.75E-11 | 2.74E-10 | 9.98E-01 | 9.91E-01 | 9.99E-01 |
| 646.49121 | 53.13  | 13.53 | 12.61 | 13.61 | 12.61 | 8.80E-03 | 7.62E-02 | 9.96E-01 | 8.71E-02 | 5.11E-02 | 1.00E+00 | 5.91E-02 |
| 646.54256 | 43.07  | 17.72 | 17.68 | 17.42 | 17.53 | 4.48E-01 | 9.98E-01 | 4.46E-01 | 8.11E-01 | 5.93E-01 | 9.04E-01 | 9.50E-01 |
| 646.67784 | 47.76  | 12.46 | 16.65 | 16.59 | 16.99 | 7.30E-34 | 3.85E-14 | 3.87E-14 | 3.67E-14 | 9.98E-01 | 7.96E-01 | 6.96E-01 |
| 646.77138 | 38.12  | 11.50 | 12.72 | 12.99 | 14.75 | 1.33E-06 | 1.25E-01 | 3.47E-02 | 1.96E-07 | 9.63E-01 | 3.47E-03 | 1.45E-02 |
| 646.89046 | 53.24  | 15.11 | 10.76 | 11.67 | 12.44 | 9.99E-20 | 7.46E-14 | 3.34E-13 | 3.58E-08 | 1.68E-01 | 1.64E-03 | 3.26E-01 |
| 646.92922 | 27.81  | 14.91 | 19.55 | 17.60 | 18.66 | 7.72E-61 | 3.65E-14 | 3.65E-14 | 3.65E-14 | 7.39E-14 | 2.77E-04 | 8.57E-06 |
| 647.02966 | 287.43 | 13.05 | 15.26 | 14.95 | 15.25 | 4.16E-05 | 2.35E-04 | 1.97E-03 | 3.91E-04 | 9.39E-01 | 1.00E+00 | 9.48E-01 |
| 647.13134 | 68.74  | 10.38 | 11.31 | 12.89 | 11.31 | 1.66E-05 | 2.37E-01 | 3.51E-06 | 2.61E-01 | 1.05E-02 | 1.00E+00 | 1.31E-02 |
| 647.33897 | 280.88 | 16.24 | 14.43 | 14.81 | 15.26 | 2.29E-07 | 1.96E-07 | 4.62E-05 | 1.44E-02 | 6.49E-01 | 6.71E-02 | 5.29E-01 |
| 647.45822 | 23.81  | 17.31 | 11.28 | 11.72 | 12.52 | 3.09E-38 | 3.65E-14 | 3.65E-14 | 5.07E-14 | 7.33E-01 | 2.56E-02 | 2.51E-01 |
| 647.75922 | 49.15  | 9.73  | 12.15 | 12.39 | 12.31 | 9.30E-09 | 3.95E-06 | 2.47E-07 | 1.53E-06 | 9.59E-01 | 9.89E-01 | 9.98E-01 |
| 647.87919 | 52.29  | 16.54 | 14.89 | 15.60 | 15.01 | 1.12E-04 | 2.06E-04 | 7.50E-02 | 9.38E-04 | 2.88E-01 | 9.93E-01 | 4.65E-01 |
| 647.94008 | 42.43  | 16.44 | 19.54 | 18.38 | 19.12 | 8.48E-39 | 3.65E-14 | 7.55E-14 | 3.65E-14 | 2.95E-07 | 2.02E-01 | 2.89E-03 |
| 648.06177 | 279.59 | 12.91 | 14.55 | 14.62 | 14.80 | 1.96E-03 | 1.62E-02 | 1.02E-02 | 5.09E-03 | 9.99E-01 | 9.74E-01 | 9.89E-01 |
| 648.06214 | 54.1   | 19.17 | 21.59 | 21.27 | 21.05 | 1.07E-16 | 7.82E-14 | 4.10E-12 | 1.84E-09 | 6.71E-01 | 2.56E-01 | 8.74E-01 |
| 648.11953 | 61.44  | 13.85 | 17.35 | 17.71 | 16.91 | 8.75E-19 | 1.32E-13 | 7.45E-14 | 1.09E-10 | 8.26E-01 | 7.58E-01 | 2.62E-01 |
| 648.33701 | 281.21 | 16.03 | 14.50 | 14.92 | 15.25 | 3.34E-06 | 1.50E-06 | 7.40E-04 | 4.22E-02 | 4.84E-01 | 7.01E-02 | 7.00E-01 |
| 648.44687 | 41.06  | 17.80 | 17.93 | 15.05 | 17.08 | 7.07E-14 | 9.82E-01 | 7.60E-12 | 2.32E-01 | 3.70E-12 | 1.28E-01 | 2.11E-06 |
| 648.49637 | 52.9   | 15.96 | 18.56 | 18.60 | 17.44 | 4.26E-21 | 7.48E-14 | 7.64E-14 | 1.90E-06 | 9.99E-01 | 8.23E-04 | 4.27E-04 |
| 648.55152 | 282.01 | 13.75 | 14.09 | 13.00 | 13.47 | 6.06E-01 | 9.75E-01 | 7.82E-01 | 9.86E-01 | 5.51E-01 | 8.87E-01 | 9.45E-01 |
| 648.56442 | 54.24  | 11.04 | 14.37 | 12.08 | 15.74 | 2.75E-08 | 1.70E-04 | 5.32E-01 | 9.58E-08 | 2.36E-02 | 3.50E-01 | 7.58E-05 |
| 648.61805 | 279.57 | 15.46 | 14.91 | 15.06 | 15.58 | 2.42E-01 | 4.24E-01 | 6.73E-01 | 9.90E-01 | 9.79E-01 | 3.05E-01 | 5.21E-01 |
| 648.62689 | 46.4   | 15.08 | 17.12 | 17.22 | 17.26 | 1.07E-31 | 4.94E-14 | 3.87E-14 | 4.05E-14 | 9.44E-01 | 8.69E-01 | 9.96E-01 |
| 648.7601  | 48.35  | 10.20 | 11.29 | 11.48 | 13.22 | 9.13E-12 | 1.83E-02 | 3.21E-03 | 7.38E-13 | 9.60E-01 | 1.12E-05 | 7.92E-05 |
| 648.76079 | 274.95 | 12.98 | 14.68 | 14.81 | 14.80 | 2.18E-03 | 1.50E-02 | 6.51E-03 | 1.03E-02 | 9.96E-01 | 9.97E-01 | 1.00E+00 |
| 648.93971 | 52.32  | 13.99 | 17.44 | 16.77 | 17.15 | 7.60E-12 | 1.79E-10 | 2.30E-07 | 1.33E-08 | 5.47E-01 | 9.42E-01 | 8.88E-01 |
| 648.93998 | 281.76 | 13.96 | 14.43 | 14.11 | 15.35 | 1.08E-01 | 8.46E-01 | 9.94E-01 | 9.19E-02 | 9.47E-01 | 4.40E-01 | 1.75E-01 |

|           |        |       |       |       |       |          |          |          |          |          |          |          |
|-----------|--------|-------|-------|-------|-------|----------|----------|----------|----------|----------|----------|----------|
| 648.99372 | 55.22  | 13.95 | 13.68 | 13.87 | 12.93 | 1.16E-01 | 9.25E-01 | 9.98E-01 | 1.08E-01 | 9.71E-01 | 3.72E-01 | 1.69E-01 |
| 649.07845 | 169.48 | 7.34  | 13.23 | 11.00 | 10.76 | 1.03E-14 | 7.58E-14 | 4.16E-07 | 6.09E-06 | 6.37E-03 | 2.83E-03 | 9.85E-01 |
| 649.18513 | 277.47 | 14.93 | 13.97 | 14.38 | 14.84 | 1.41E-01 | 1.43E-01 | 6.01E-01 | 9.97E-01 | 8.10E-01 | 2.59E-01 | 7.59E-01 |
| 649.22028 | 251.92 | 13.96 | 12.92 | 12.67 | 13.19 | 2.63E-01 | 4.30E-01 | 2.29E-01 | 6.98E-01 | 9.84E-01 | 9.82E-01 | 8.83E-01 |
| 649.34108 | 280.03 | 16.46 | 14.57 | 15.01 | 15.26 | 1.42E-05 | 9.40E-06 | 9.87E-04 | 1.36E-02 | 6.76E-01 | 3.24E-01 | 9.24E-01 |
| 649.37955 | 51.82  | 11.87 | 12.04 | 12.28 | 11.81 | 7.95E-01 | 9.87E-01 | 8.34E-01 | 9.99E-01 | 9.62E-01 | 9.73E-01 | 7.98E-01 |
| 649.43735 | 46.08  | 11.48 | 11.55 | 9.96  | 12.40 | 9.97E-05 | 9.99E-01 | 1.32E-02 | 2.84E-01 | 1.19E-02 | 3.80E-01 | 3.65E-05 |
| 649.49913 | 52.89  | 12.81 | 16.15 | 15.89 | 15.80 | 7.65E-13 | 7.93E-11 | 1.45E-09 | 1.50E-08 | 9.46E-01 | 8.90E-01 | 9.98E-01 |
| 649.55817 | 281.26 | 14.08 | 13.75 | 12.54 | 14.66 | 3.51E-02 | 9.67E-01 | 1.26E-01 | 8.54E-01 | 3.37E-01 | 6.20E-01 | 2.38E-02 |
| 649.56173 | 53.17  | 10.41 | 12.50 | 10.64 | 13.48 | 5.05E-05 | 1.87E-02 | 9.88E-01 | 2.24E-04 | 5.39E-02 | 5.68E-01 | 1.06E-03 |
| 649.7272  | 281.2  | 16.51 | 14.38 | 13.72 | 14.37 | 3.05E-07 | 1.82E-04 | 3.19E-07 | 2.58E-04 | 5.66E-01 | 1.00E+00 | 6.01E-01 |
| 649.75942 | 49.48  | 10.32 | 11.65 | 12.29 | 12.47 | 9.65E-08 | 3.31E-03 | 2.31E-06 | 6.39E-07 | 3.48E-01 | 1.78E-01 | 9.72E-01 |
| 649.87718 | 52.2   | 14.73 | 12.25 | 12.46 | 13.02 | 2.36E-16 | 8.76E-14 | 8.60E-13 | 1.78E-07 | 8.94E-01 | 6.20E-02 | 2.60E-01 |
| 649.9402  | 50.86  | 10.51 | 13.50 | 11.99 | 13.24 | 3.15E-05 | 6.27E-05 | 1.11E-01 | 4.73E-04 | 1.22E-01 | 9.83E-01 | 2.80E-01 |
| 650.05779 | 53.94  | 16.51 | 19.13 | 18.70 | 18.62 | 1.85E-19 | 7.54E-14 | 2.81E-13 | 7.70E-12 | 4.17E-01 | 2.86E-01 | 9.91E-01 |
| 650.34284 | 280.92 | 16.75 | 15.34 | 15.67 | 15.93 | 1.77E-03 | 1.12E-03 | 2.01E-02 | 1.42E-01 | 8.18E-01 | 4.40E-01 | 9.13E-01 |
| 650.37536 | 51.27  | 12.76 | 12.52 | 12.47 | 12.50 | 9.23E-01 | 9.59E-01 | 9.22E-01 | 9.52E-01 | 9.99E-01 | 1.00E+00 | 1.00E+00 |
| 650.4386  | 30.62  | 16.95 | 14.85 | 15.72 | 14.79 | 3.65E-06 | 2.57E-05 | 2.94E-02 | 2.47E-05 | 2.29E-01 | 9.99E-01 | 1.96E-01 |
| 650.48369 | 51.04  | 17.68 | 13.78 | 13.49 | 15.01 | 2.26E-17 | 1.89E-13 | 7.58E-14 | 7.09E-07 | 9.34E-01 | 7.19E-02 | 1.38E-02 |
| 650.53625 | 45.95  | 16.46 | 17.15 | 16.88 | 16.84 | 4.60E-02 | 2.49E-02 | 2.89E-01 | 4.11E-01 | 7.12E-01 | 6.36E-01 | 9.99E-01 |
| 650.62441 | 46.93  | 15.93 | 18.29 | 18.35 | 18.13 | 5.22E-25 | 7.32E-14 | 6.83E-14 | 7.56E-14 | 9.93E-01 | 9.18E-01 | 8.01E-01 |
| 650.66242 | 44.7   | 13.02 | 13.21 | 14.42 | 13.63 | 1.65E-03 | 9.53E-01 | 1.26E-03 | 3.84E-01 | 1.10E-02 | 7.21E-01 | 1.97E-01 |
| 650.74635 | 267.54 | 15.70 | 15.24 | 15.50 | 15.39 | 6.18E-01 | 5.57E-01 | 9.42E-01 | 8.26E-01 | 8.85E-01 | 9.77E-01 | 9.90E-01 |
| 650.82003 | 265.47 | 16.26 | 15.90 | 16.21 | 16.52 | 3.80E-01 | 6.93E-01 | 9.99E-01 | 8.75E-01 | 7.96E-01 | 2.94E-01 | 8.12E-01 |
| 650.90193 | 265.94 | 16.01 | 15.26 | 15.93 | 15.58 | 7.30E-02 | 7.77E-02 | 9.95E-01 | 5.23E-01 | 1.50E-01 | 7.74E-01 | 6.88E-01 |
| 650.97482 | 266.1  | 11.68 | 16.56 | 16.81 | 16.06 | 1.15E-14 | 2.69E-11 | 1.83E-12 | 5.29E-09 | 9.83E-01 | 8.95E-01 | 7.10E-01 |
| 651.03921 | 43.14  | 16.20 | 15.75 | 16.11 | 17.83 | 5.12E-05 | 7.20E-01 | 9.97E-01 | 1.63E-03 | 8.46E-01 | 4.92E-05 | 1.05E-03 |
| 651.04708 | 268.56 | 15.58 | 15.46 | 15.79 | 15.81 | 7.95E-01 | 9.90E-01 | 9.50E-01 | 9.36E-01 | 8.47E-01 | 8.28E-01 | 1.00E+00 |
| 651.06344 | 54.22  | 11.49 | 11.97 | 11.66 | 12.67 | 7.92E-02 | 7.24E-01 | 9.82E-01 | 6.20E-02 | 9.14E-01 | 4.75E-01 | 1.59E-01 |
| 651.08309 | 284.38 | 16.13 | 15.11 | 15.53 | 16.31 | 4.50E-02 | 1.09E-01 | 5.37E-01 | 9.80E-01 | 7.96E-01 | 5.96E-02 | 3.54E-01 |
| 651.10451 | 263.2  | 17.45 | 16.78 | 18.48 | 17.58 | 3.00E-05 | 1.86E-01 | 9.97E-03 | 9.78E-01 | 6.56E-06 | 1.04E-01 | 5.09E-02 |
| 651.13112 | 266.24 | 13.46 | 16.58 | 16.77 | 16.48 | 1.91E-09 | 4.14E-07 | 5.61E-08 | 2.09E-06 | 9.88E-01 | 9.98E-01 | 9.60E-01 |
| 651.14362 | 82.84  | 13.10 | 12.92 | 13.04 | 10.44 | 1.35E-03 | 9.95E-01 | 1.00E+00 | 2.63E-03 | 9.99E-01 | 8.23E-03 | 4.66E-03 |
| 651.2067  | 266.25 | 16.27 | 16.27 | 16.44 | 16.86 | 4.16E-01 | 1.00E+00 | 9.68E-01 | 4.29E-01 | 9.68E-01 | 4.48E-01 | 7.19E-01 |
| 651.2813  | 267.91 | 15.39 | 15.13 | 15.48 | 14.98 | 4.47E-01 | 8.57E-01 | 9.93E-01 | 6.14E-01 | 7.28E-01 | 9.73E-01 | 4.71E-01 |
| 651.34338 | 280.11 | 16.25 | 15.13 | 15.16 | 15.82 | 3.73E-02 | 6.32E-02 | 6.92E-02 | 7.84E-01 | 1.00E+00 | 4.71E-01 | 4.99E-01 |
| 651.35601 | 269.48 | 15.07 | 14.74 | 15.14 | 14.87 | 5.95E-01 | 7.28E-01 | 9.96E-01 | 9.23E-01 | 6.07E-01 | 9.82E-01 | 8.41E-01 |
| 651.43236 | 277.72 | 16.01 | 14.39 | 14.65 | 15.56 | 5.84E-03 | 9.31E-03 | 3.76E-02 | 8.25E-01 | 9.62E-01 | 1.37E-01 | 3.24E-01 |
| 651.501   | 53.23  | 14.83 | 18.77 | 17.29 | 17.36 | 3.23E-12 | 7.43E-13 | 7.03E-06 | 8.38E-06 | 2.09E-02 | 3.95E-02 | 9.99E-01 |
| 651.60439 | 279.77 | 16.30 | 15.33 | 14.62 | 15.79 | 2.35E-02 | 3.05E-01 | 1.35E-02 | 8.10E-01 | 5.95E-01 | 8.63E-01 | 1.88E-01 |
| 651.6473  | 282.06 | 16.78 | 15.08 | 14.33 | 15.79 | 2.33E-04 | 1.57E-02 | 1.09E-04 | 3.21E-01 | 5.63E-01 | 6.42E-01 | 6.98E-02 |
| 651.69158 | 283.17 | 16.86 | 15.70 | 14.65 | 16.27 | 5.68E-04 | 1.32E-01 | 2.44E-04 | 7.01E-01 | 2.25E-01 | 7.44E-01 | 2.21E-02 |
| 651.73253 | 281.92 | 16.17 | 15.42 | 15.51 | 15.91 | 5.16E-01 | 5.40E-01 | 6.32E-01 | 9.68E-01 | 9.99E-01 | 8.45E-01 | 9.06E-01 |
| 651.77984 | 282.74 | 16.84 | 15.26 | 15.50 | 16.02 | 8.52E-03 | 8.18E-03 | 3.32E-02 | 3.61E-01 | 9.63E-01 | 4.71E-01 | 7.56E-01 |
| 651.99883 | 52.98  | 13.73 | 14.98 | 13.53 | 14.45 | 9.80E-03 | 3.56E-02 | 9.76E-01 | 4.27E-01 | 1.34E-02 | 6.95E-01 | 2.41E-01 |
| 652.10847 | 237.26 | 12.11 | 13.27 | 14.34 | 13.11 | 4.74E-04 | 1.14E-01 | 1.18E-04 | 2.40E-01 | 1.84E-01 | 9.90E-01 | 1.07E-01 |
| 652.21445 | 284.21 | 16.67 | 15.57 | 15.32 | 16.23 | 3.87E-02 | 1.40E-01 | 4.04E-02 | 8.35E-01 | 9.64E-01 | 6.16E-01 | 3.28E-01 |
| 652.25723 | 283.92 | 17.04 | 16.09 | 15.28 | 16.87 | 1.18E-03 | 1.86E-01 | 1.34E-03 | 9.85E-01 | 3.52E-01 | 4.05E-01 | 9.02E-03 |
| 652.30036 | 284.55 | 17.00 | 15.65 | 15.36 | 16.39 | 1.30E-02 | 6.25E-02 | 1.34E-02 | 6.93E-01 | 9.56E-01 | 5.64E-01 | 2.71E-01 |
| 652.34238 | 37.32  | 15.05 | 9.42  | 9.58  | 11.74 | 2.46E-18 | 7.56E-14 | 7.62E-14 | 3.98E-06 | 9.95E-01 | 3.44E-03 | 6.85E-03 |
| 652.34371 | 283.49 | 16.77 | 15.56 | 15.58 | 16.42 | 8.91E-02 | 1.51E-01 | 1.55E-01 | 9.35E-01 | 1.00E+00 | 4.84E-01 | 4.95E-01 |
| 652.38774 | 282.94 | 16.95 | 15.39 | 15.33 | 15.82 | 1.01E-02 | 2.21E-02 | 1.49E-02 | 1.78E-01 | 1.00E+00 | 8.75E-01 | 8.26E-01 |
| 652.43184 | 282.3  | 17.13 | 15.61 | 15.09 | 15.87 | 9.69E-04 | 1.85E-02 | 5.33E-04 | 8.48E-02 | 7.65E-01 | 9.63E-01 | 4.79E-01 |
| 652.48787 | 48.68  | 18.71 | 18.46 | 17.01 | 18.23 | 5.33E-06 | 8.78E-01 | 4.37E-06 | 4.98E-01 | 2.24E-04 | 9.13E-01 | 3.90E-03 |
| 652.52479 | 43.02  | 12.13 | 10.95 | 10.55 | 12.08 | 3.57E-04 | 3.51E-02 | 1.66E-03 | 1.00E+00 | 8.04E-01 | 6.77E-02 | 4.91E-03 |
| 652.53886 | 42.61  | 15.04 | 13.44 | 12.46 | 13.81 | 6.17E-06 | 6.58E-03 | 1.34E-06 | 7.14E-02 | 2.04E-01 | 8.87E-01 | 4.25E-02 |
| 652.60892 | 44.06  | 12.92 | 10.99 | 11.77 | 12.62 | 5.16E-06 | 6.62E-06 | 1.60E-02 | 8.81E-01 | 1.93E-01 | 4.71E-04 | 1.55E-01 |
| 652.62256 | 47.12  | 15.55 | 17.92 | 17.96 | 17.68 | 1.63E-29 | 4.63E-14 | 4.14E-14 | 7.34E-14 | 9.98E-01 | 6.95E-01 | 5.73E-01 |
| 652.66146 | 44.65  | 11.32 | 14.41 | 15.17 | 14.41 | 5.09E-12 | 1.02E-07 | 2.28E-11 | 2.37E-07 | 5.06E-01 | 1.00E+00 | 5.19E-01 |
| 652.71199 | 47.84  | 13.55 | 15.82 | 15.75 | 16.10 | 1.25E-09 | 5.18E-07 | 1.03E-06 | 3.80E-08 | 9.98E-01 | 9.23E-01 | 8.48E-01 |
| 652.80746 | 64.26  | 10.02 | 12.08 | 11.15 | 10.82 | 1.92E-03 | 6.51E-04 | 1.32E-01 | 4.47E-01 | 3.11E-01 | 1.08E-01 | 9.31E-01 |
| 652.8353  | 51.31  | 12.08 | 12.36 | 12.86 | 11.93 | 2.64E-01 | 9.35E-01 | 3.62E-01 | 9.90E-01 | 7.46E-01 | 8.29E-01 | 2.57E-01 |
| 652.89146 | 49     | 16.04 | 8.99  | 9.71  | 10.70 | 1.01E-25 | 5.03E-14 | 7.38E-14 | 1.19E-13 | 6.72E-01 | 5.08E-02 | 4.37E-01 |
| 653.10464 | 288.1  | 14.81 | 12.22 | 13.56 | 13.19 | 2.96E-06 | 6.38E-07 | 4.06E-02 | 5.25E-03 | 2.94E-02 | 2.13E-01 | 8.74E-01 |
| 653.11345 | 299.21 | 12.52 | 16.28 | 17.05 | 14.54 | 4.62E-12 | 2.86E-08 | 1.50E-11 | 8.73E-03 | 6.12E-01 | 4.10E-02 | 7.89E-04 |
| 653.1263  | 64.74  | 13.41 | 16.67 | 14.57 | 15.14 | 3.36E-05 | 8.22E-06 | 2.85E-01 | 5.42E-02 | 1.09E-02 | 1.24E-01 | 8.45E-01 |
| 653.4796  | 53.39  | 14.27 | 12.32 | 14.99 | 12.54 | 1.10E-06 | 1.92E-03 | 5.35E-01 | 1.05E-02 | 1.35E-05 | 9.78E-01 | 1.31E-04 |
| 653.59228 | 156.01 | 7.19  | 12.52 | 11.29 | 11.66 | 1.66E-41 | 3.65E-14 | 3.70E-14 | 3.65E-14 | 1.88E-03 | 6.52E-02 | 7.19E-01 |

|           |        |       |       |       |       |          |          |          |          |          |          |          |
|-----------|--------|-------|-------|-------|-------|----------|----------|----------|----------|----------|----------|----------|
| 653.82843 | 50.74  | 14.32 | 17.86 | 17.91 | 16.74 | 2.90E-32 | 3.67E-14 | 3.65E-14 | 1.16E-13 | 9.99E-01 | 1.12E-03 | 5.55E-04 |
| 654.04674 | 269.79 | 15.82 | 14.46 | 15.15 | 15.23 | 1.67E-03 | 4.76E-04 | 1.99E-01 | 3.34E-01 | 1.90E-01 | 1.39E-01 | 9.96E-01 |
| 654.10415 | 266.8  | 12.21 | 13.98 | 15.41 | 13.57 | 3.36E-08 | 2.88E-03 | 4.29E-09 | 4.32E-02 | 2.89E-02 | 8.70E-01 | 3.19E-03 |
| 654.12815 | 274.31 | 12.24 | 14.79 | 13.74 | 14.82 | 2.77E-04 | 8.15E-04 | 1.03E-01 | 1.01E-03 | 4.01E-01 | 1.00E+00 | 3.99E-01 |
| 654.1836  | 144.53 | 9.16  | 15.14 | 12.00 | 12.73 | 2.87E-14 | 7.72E-14 | 2.01E-04 | 3.87E-06 | 6.31E-05 | 5.28E-03 | 7.38E-01 |
| 654.21199 | 70.77  | 9.45  | 11.14 | 11.45 | 9.47  | 1.22E-07 | 3.16E-04 | 9.79E-06 | 1.00E+00 | 8.79E-01 | 9.61E-04 | 4.43E-05 |
| 654.24562 | 74.25  | 11.96 | 13.78 | 12.69 | 12.55 | 1.62E-09 | 2.17E-10 | 2.73E-02 | 1.29E-01 | 3.59E-04 | 7.72E-05 | 9.56E-01 |
| 654.33198 | 25.77  | 14.55 | 7.85  | 10.25 | 10.46 | 9.70E-31 | 3.65E-14 | 7.46E-14 | 1.22E-13 | 1.03E-05 | 3.24E-06 | 9.77E-01 |
| 654.33682 | 276.5  | 14.98 | 15.06 | 15.41 | 15.57 | 5.77E-01 | 9.98E-01 | 7.97E-01 | 6.07E-01 | 8.91E-01 | 7.33E-01 | 9.86E-01 |
| 654.48213 | 48.69  | 18.79 | 17.68 | 17.66 | 17.42 | 2.62E-07 | 6.86E-05 | 4.56E-05 | 1.19E-06 | 1.00E+00 | 7.68E-01 | 7.90E-01 |
| 654.57093 | 45.37  | 15.06 | 16.47 | 16.29 | 16.06 | 9.50E-05 | 1.50E-04 | 1.03E-03 | 1.73E-02 | 9.56E-01 | 6.38E-01 | 9.00E-01 |
| 654.62193 | 47.44  | 14.16 | 15.78 | 15.87 | 16.01 | 4.95E-11 | 1.43E-07 | 2.14E-08 | 4.94E-09 | 9.91E-01 | 8.75E-01 | 9.65E-01 |
| 654.69497 | 48.61  | 12.15 | 12.29 | 11.07 | 11.74 | 3.94E-02 | 9.89E-01 | 7.43E-02 | 8.13E-01 | 4.11E-02 | 6.53E-01 | 4.83E-01 |
| 654.70899 | 48.05  | 13.49 | 16.62 | 16.54 | 16.98 | 2.34E-29 | 6.36E-14 | 6.65E-14 | 4.14E-14 | 9.94E-01 | 6.44E-01 | 4.76E-01 |
| 654.82986 | 51.15  | 13.41 | 12.48 | 12.75 | 12.87 | 1.09E-02 | 6.16E-03 | 8.90E-02 | 2.40E-01 | 7.81E-01 | 5.67E-01 | 9.80E-01 |
| 655.13413 | 72.59  | 15.01 | 15.96 | 16.02 | 13.74 | 6.21E-05 | 2.40E-01 | 1.89E-01 | 6.94E-02 | 1.00E+00 | 2.66E-04 | 1.53E-04 |
| 655.1506  | 139.11 | 6.21  | 10.71 | 8.44  | 8.76  | 6.24E-15 | 7.47E-14 | 5.41E-05 | 6.09E-06 | 7.20E-05 | 1.52E-03 | 9.22E-01 |
| 655.24621 | 75.85  | 10.51 | 17.04 | 15.38 | 14.30 | 9.21E-26 | 3.79E-14 | 7.36E-14 | 3.56E-10 | 1.48E-02 | 1.55E-05 | 2.24E-01 |
| 655.34535 | 276.39 | 16.23 | 15.22 | 15.32 | 15.59 | 3.92E-03 | 4.85E-03 | 1.35E-02 | 1.68E-01 | 9.86E-01 | 6.37E-01 | 8.24E-01 |
| 655.43517 | 266.38 | 15.03 | 15.19 | 15.17 | 14.53 | 5.71E-01 | 9.88E-01 | 9.92E-01 | 7.58E-01 | 1.00E+00 | 5.88E-01 | 6.06E-01 |
| 655.47003 | 36.39  | 16.86 | 13.29 | 14.03 | 14.93 | 3.99E-16 | 7.45E-14 | 7.14E-11 | 2.49E-05 | 2.66E-01 | 7.75E-04 | 1.43E-01 |
| 655.74136 | 278.51 | 15.99 | 14.84 | 15.15 | 15.70 | 1.39E-03 | 1.55E-03 | 3.48E-02 | 8.02E-01 | 7.64E-01 | 4.66E-02 | 3.33E-01 |
| 655.82515 | 50.7   | 14.01 | 18.18 | 18.22 | 17.27 | 4.23E-36 | 3.65E-14 | 3.65E-14 | 7.09E-14 | 9.99E-01 | 2.86E-02 | 1.93E-02 |
| 655.92887 | 52.48  | 15.72 | 17.78 | 17.79 | 16.72 | 9.16E-10 | 4.13E-08 | 2.66E-08 | 2.45E-02 | 1.00E+00 | 1.95E-02 | 1.69E-02 |
| 655.94798 | 278.83 | 15.02 | 15.18 | 15.31 | 15.17 | 7.93E-01 | 9.39E-01 | 7.37E-01 | 9.52E-01 | 9.74E-01 | 1.00E+00 | 9.70E-01 |
| 656.04913 | 55.88  | 13.11 | 16.34 | 14.68 | 16.90 | 2.43E-07 | 2.15E-05 | 9.51E-02 | 8.84E-07 | 8.22E-02 | 8.65E-01 | 1.12E-02 |
| 656.15073 | 273.33 | 15.47 | 14.96 | 15.12 | 15.17 | 2.40E-01 | 1.84E-01 | 4.97E-01 | 6.63E-01 | 9.28E-01 | 8.55E-01 | 9.97E-01 |
| 656.24209 | 75.49  | 8.94  | 12.45 | 10.38 | 11.92 | 1.14E-20 | 7.29E-14 | 2.44E-04 | 1.27E-13 | 1.38E-07 | 4.76E-01 | 2.23E-04 |
| 656.34021 | 278.61 | 16.38 | 14.84 | 15.01 | 15.61 | 2.83E-06 | 7.12E-06 | 6.20E-05 | 7.07E-02 | 9.56E-01 | 9.21E-02 | 2.49E-01 |
| 656.35828 | 271.21 | 15.67 | 14.65 | 14.98 | 15.29 | 3.65E-02 | 2.44E-02 | 2.04E-01 | 7.22E-01 | 8.13E-01 | 3.38E-01 | 8.40E-01 |
| 656.43393 | 52.89  | 13.67 | 11.98 | 11.94 | 12.40 | 1.27E-04 | 5.98E-04 | 3.58E-04 | 2.26E-02 | 1.00E+00 | 7.81E-01 | 7.26E-01 |
| 656.47959 | 49.22  | 18.30 | 18.67 | 18.89 | 17.63 | 1.05E-03 | 6.32E-01 | 2.18E-01 | 1.48E-01 | 8.95E-01 | 8.88E-03 | 7.31E-04 |
| 656.52447 | 22.54  | 16.30 | 7.88  | 9.38  | 11.35 | 2.65E-41 | 3.65E-14 | 3.65E-14 | 7.52E-14 | 2.43E-02 | 5.02E-09 | 1.61E-03 |
| 656.56607 | 48.22  | 16.44 | 18.49 | 18.37 | 18.46 | 2.37E-13 | 1.31E-10 | 8.94E-10 | 7.26E-10 | 9.80E-01 | 1.00E+00 | 9.94E-01 |
| 656.70228 | 49.03  | 13.97 | 15.72 | 15.47 | 16.24 | 5.11E-11 | 3.23E-07 | 1.25E-05 | 9.45E-11 | 8.61E-01 | 3.95E-01 | 8.90E-02 |
| 656.92361 | 53.64  | 17.93 | 17.95 | 17.62 | 16.59 | 2.61E-04 | 1.00E+00 | 7.69E-01 | 4.94E-04 | 7.61E-01 | 6.66E-04 | 1.57E-02 |
| 656.98488 | 52.94  | 10.14 | 11.87 | 13.81 | 11.78 | 1.24E-07 | 2.09E-02 | 1.35E-08 | 3.80E-02 | 8.71E-03 | 9.99E-01 | 7.23E-03 |
| 657.04856 | 55.75  | 12.24 | 14.71 | 12.96 | 15.73 | 8.42E-06 | 3.46E-03 | 7.37E-01 | 1.87E-05 | 7.97E-02 | 5.27E-01 | 1.47E-03 |
| 657.15392 | 79.08  | 9.97  | 12.56 | 11.07 | 10.51 | 2.47E-04 | 1.12E-04 | 2.41E-01 | 8.07E-01 | 7.06E-02 | 7.04E-03 | 8.08E-01 |
| 657.36256 | 52.09  | 12.41 | 11.76 | 12.71 | 10.88 | 4.40E-03 | 5.85E-01 | 9.30E-01 | 1.96E-02 | 2.65E-01 | 3.58E-01 | 3.92E-03 |
| 657.41904 | 27.21  | 13.56 | 16.22 | 13.58 | 15.14 | 4.84E-26 | 5.96E-14 | 1.00E+00 | 8.48E-09 | 6.81E-14 | 1.91E-04 | 2.71E-08 |
| 657.48399 | 50.75  | 15.75 | 15.67 | 16.57 | 14.69 | 3.44E-03 | 9.98E-01 | 3.00E-01 | 1.28E-01 | 2.47E-01 | 2.06E-01 | 1.09E-03 |
| 657.74727 | 278.95 | 15.81 | 14.63 | 14.93 | 15.15 | 5.84E-04 | 3.28E-04 | 1.18E-02 | 1.18E-01 | 7.40E-01 | 3.18E-01 | 8.81E-01 |
| 657.8219  | 50.72  | 13.78 | 14.04 | 13.91 | 13.97 | 5.62E-01 | 5.04E-01 | 8.93E-01 | 7.58E-01 | 9.07E-01 | 9.84E-01 | 9.91E-01 |
| 657.90541 | 53.15  | 14.29 | 11.72 | 11.37 | 12.29 | 2.20E-23 | 7.66E-14 | 6.18E-14 | 5.91E-11 | 6.03E-01 | 1.85E-01 | 7.46E-03 |
| 657.91442 | 48.57  | 16.12 | 17.43 | 14.90 | 16.19 | 1.89E-09 | 1.37E-03 | 3.17E-03 | 9.97E-01 | 1.55E-10 | 5.72E-03 | 3.10E-03 |
| 657.92607 | 39.16  | 12.83 | 13.61 | 12.22 | 13.37 | 2.49E-04 | 8.39E-02 | 2.24E-01 | 3.71E-01 | 2.47E-04 | 9.05E-01 | 4.59E-03 |
| 657.94758 | 280.09 | 15.82 | 16.45 | 16.35 | 15.88 | 1.47E-01 | 2.20E-01 | 3.67E-01 | 9.98E-01 | 9.90E-01 | 3.55E-01 | 5.28E-01 |
| 658.04678 | 54.97  | 11.03 | 10.43 | 9.37  | 11.99 | 1.80E-03 | 7.91E-01 | 4.88E-02 | 4.68E-01 | 3.76E-01 | 1.05E-01 | 8.16E-04 |
| 658.1517  | 279.32 | 15.74 | 16.62 | 16.47 | 16.15 | 6.85E-02 | 6.46E-02 | 1.57E-01 | 6.71E-01 | 9.78E-01 | 5.93E-01 | 8.19E-01 |
| 658.35303 | 279.28 | 16.09 | 16.30 | 16.25 | 16.22 | 9.35E-01 | 9.24E-01 | 9.64E-01 | 9.82E-01 | 9.99E-01 | 9.96E-01 | 1.00E+00 |
| 658.42894 | 29.27  | 16.23 | 19.82 | 17.80 | 18.76 | 7.61E-39 | 3.65E-14 | 5.47E-11 | 5.30E-14 | 7.41E-14 | 5.32E-05 | 2.59E-04 |
| 658.43559 | 265.53 | 13.12 | 15.01 | 15.09 | 13.57 | 3.72E-03 | 1.94E-02 | 1.24E-02 | 9.04E-01 | 9.99E-01 | 1.54E-01 | 1.16E-01 |
| 658.47507 | 46.77  | 17.54 | 13.52 | 13.05 | 14.39 | 7.30E-13 | 1.08E-09 | 7.36E-12 | 4.01E-06 | 8.73E-01 | 5.27E-01 | 1.53E-01 |
| 658.51857 | 266.95 | 14.37 | 14.66 | 15.24 | 14.82 | 1.68E-01 | 8.87E-01 | 1.14E-01 | 6.78E-01 | 4.61E-01 | 9.78E-01 | 7.35E-01 |
| 658.54046 | 21.8   | 19.01 | 13.75 | 15.44 | 15.90 | 1.01E-41 | 3.65E-14 | 3.94E-14 | 7.58E-14 | 8.19E-07 | 8.76E-10 | 4.56E-01 |
| 658.54749 | 279.67 | 14.60 | 15.49 | 15.37 | 15.60 | 1.09E-01 | 1.95E-01 | 3.03E-01 | 1.29E-01 | 9.94E-01 | 9.95E-01 | 9.60E-01 |
| 658.56758 | 46.77  | 16.14 | 18.17 | 18.05 | 17.48 | 8.08E-09 | 6.54E-08 | 3.16E-07 | 1.01E-03 | 9.85E-01 | 2.26E-01 | 3.88E-01 |
| 658.59341 | 266.51 | 15.25 | 14.72 | 14.76 | 14.87 | 5.12E-01 | 5.29E-01 | 5.89E-01 | 7.76E-01 | 1.00E+00 | 9.85E-01 | 9.94E-01 |
| 658.6574  | 47.28  | 14.90 | 16.80 | 16.82 | 16.90 | 5.15E-20 | 8.40E-14 | 7.69E-14 | 7.63E-14 | 1.00E+00 | 9.71E-01 | 9.83E-01 |
| 658.69447 | 49.29  | 12.79 | 12.26 | 12.33 | 12.06 | 2.58E-01 | 4.84E-01 | 5.88E-01 | 2.17E-01 | 9.98E-01 | 9.52E-01 | 8.97E-01 |
| 658.75123 | 280.74 | 15.52 | 15.36 | 15.61 | 15.82 | 4.45E-01 | 9.27E-01 | 9.88E-01 | 7.04E-01 | 7.98E-01 | 3.67E-01 | 8.77E-01 |
| 658.7935  | 287.32 | 15.33 | 14.18 | 15.03 | 14.49 | 7.73E-02 | 7.35E-02 | 9.18E-01 | 3.09E-01 | 2.97E-01 | 9.26E-01 | 6.97E-01 |
| 658.89709 | 52.11  | 18.43 | 15.95 | 18.26 | 14.74 | 1.57E-10 | 1.28E-04 | 9.92E-01 | 1.02E-08 | 5.93E-04 | 1.92E-01 | 9.29E-08 |
| 658.92931 | 28.05  | 14.40 | 19.47 | 17.11 | 18.30 | 2.35E-62 | 3.65E-14 | 3.67E-14 | 3.65E-14 | 6.36E-14 | 3.21E-06 | 1.53E-06 |
| 659.05288 | 54.05  | 13.02 | 18.56 | 17.37 | 17.73 | 7.33E-23 | 6.83E-14 | 1.03E-13 | 7.65E-14 | 1.16E-01 | 4.38E-01 | 9.09E-01 |
| 659.09848 | 83.91  | 9.60  | 13.71 | 13.70 | 12.15 | 4.25E-27 | 5.12E-14 | 4.92E-14 | 4.88E-10 | 1.00E+00 | 4.31E-04 | 4.00E-04 |
| 659.13843 | 64.38  | 11.10 | 15.58 | 11.62 | 12.29 | 1.40E-07 | 1.81E-07 | 9.06E-01 | 4.47E-01 | 8.56E-06 | 5.31E-04 | 8.47E-01 |

|           |        |       |       |       |       |          |          |          |          |          |          |          |
|-----------|--------|-------|-------|-------|-------|----------|----------|----------|----------|----------|----------|----------|
| 659.25926 | 37.58  | 15.74 | 16.74 | 16.38 | 17.64 | 1.20E-17 | 1.27E-06 | 3.83E-03 | 7.38E-14 | 2.31E-01 | 5.25E-05 | 4.38E-09 |
| 659.43924 | 268.58 | 13.24 | 16.00 | 15.45 | 15.65 | 3.55E-06 | 9.45E-06 | 5.26E-04 | 2.36E-04 | 7.72E-01 | 9.33E-01 | 9.87E-01 |
| 659.48738 | 52.99  | 16.11 | 18.81 | 18.51 | 17.11 | 1.70E-18 | 7.43E-14 | 2.39E-13 | 6.07E-03 | 7.49E-01 | 1.08E-06 | 7.70E-05 |
| 659.52007 | 264.85 | 16.22 | 15.60 | 15.72 | 15.79 | 2.23E-01 | 2.05E-01 | 3.74E-01 | 5.34E-01 | 9.84E-01 | 9.47E-01 | 9.97E-01 |
| 659.55029 | 39.93  | 18.20 | 15.91 | 15.40 | 16.36 | 3.35E-11 | 1.18E-07 | 5.49E-11 | 4.75E-05 | 5.78E-01 | 7.07E-01 | 9.49E-02 |
| 659.59481 | 276.03 | 16.81 | 18.24 | 18.18 | 17.76 | 8.93E-06 | 3.33E-05 | 6.66E-05 | 1.49E-02 | 9.97E-01 | 4.60E-01 | 5.73E-01 |
| 659.66984 | 276.65 | 16.78 | 18.72 | 18.88 | 18.30 | 2.63E-07 | 9.12E-06 | 9.84E-07 | 1.17E-03 | 9.77E-01 | 7.46E-01 | 4.93E-01 |
| 659.74742 | 272.92 | 16.68 | 19.43 | 19.09 | 18.79 | 2.67E-12 | 3.47E-11 | 4.43E-09 | 7.88E-07 | 8.15E-01 | 3.86E-01 | 8.79E-01 |
| 659.82415 | 276.72 | 17.00 | 18.73 | 19.27 | 18.50 | 8.88E-08 | 6.24E-05 | 5.72E-08 | 1.03E-03 | 5.20E-01 | 9.42E-01 | 2.29E-01 |
| 659.90152 | 276.04 | 14.00 | 18.51 | 18.81 | 17.86 | 1.41E-15 | 5.00E-12 | 2.16E-13 | 8.29E-09 | 9.63E-01 | 7.21E-01 | 4.22E-01 |
| 659.93822 | 27.42  | 13.43 | 16.38 | 13.45 | 15.66 | 4.64E-25 | 7.32E-14 | 1.00E+00 | 1.21E-11 | 7.47E-14 | 9.05E-02 | 4.29E-11 |
| 659.98092 | 274.58 | 16.09 | 18.41 | 18.46 | 17.82 | 7.26E-08 | 1.46E-06 | 6.32E-07 | 8.13E-04 | 9.99E-01 | 5.78E-01 | 5.00E-01 |
| 659.98861 | 53.11  | 11.16 | 16.58 | 15.25 | 13.82 | 2.65E-18 | 7.58E-14 | 1.31E-11 | 3.07E-05 | 9.18E-02 | 2.71E-05 | 7.00E-02 |
| 660.05369 | 54.35  | 12.36 | 17.14 | 15.76 | 16.45 | 7.04E-17 | 7.48E-14 | 4.75E-09 | 1.19E-11 | 5.89E-02 | 6.12E-01 | 6.10E-01 |
| 660.05558 | 267.02 | 14.68 | 17.33 | 17.17 | 17.23 | 1.68E-07 | 3.77E-06 | 1.23E-05 | 1.64E-05 | 9.91E-01 | 9.98E-01 | 1.00E+00 |
| 660.13595 | 271.25 | 16.04 | 17.04 | 16.70 | 16.89 | 2.20E-02 | 2.02E-02 | 2.11E-01 | 7.69E-02 | 7.69E-01 | 9.76E-01 | 9.53E-01 |
| 660.2069  | 268.2  | 15.30 | 14.67 | 15.10 | 14.82 | 3.00E-01 | 2.80E-01 | 9.36E-01 | 5.46E-01 | 6.39E-01 | 9.78E-01 | 8.79E-01 |
| 660.26469 | 37.98  | 9.04  | 10.67 | 10.29 | 13.27 | 9.86E-16 | 1.65E-03 | 2.43E-02 | 7.42E-14 | 8.38E-01 | 5.42E-07 | 5.82E-09 |
| 660.28872 | 266.02 | 14.35 | 15.69 | 15.38 | 14.88 | 9.84E-03 | 8.10E-03 | 6.30E-02 | 6.06E-01 | 8.88E-01 | 2.57E-01 | 6.59E-01 |
| 660.34772 | 277.16 | 15.46 | 14.93 | 15.40 | 15.59 | 3.51E-01 | 4.74E-01 | 9.98E-01 | 9.87E-01 | 5.95E-01 | 3.33E-01 | 9.63E-01 |
| 660.43841 | 33.15  | 15.91 | 18.80 | 16.34 | 18.06 | 3.28E-28 | 4.12E-14 | 2.87E-01 | 8.96E-14 | 7.49E-14 | 2.26E-02 | 1.25E-09 |
| 660.48502 | 276.77 | 12.37 | 15.73 | 15.55 | 14.63 | 2.92E-08 | 2.20E-07 | 7.96E-07 | 1.33E-03 | 9.91E-01 | 2.94E-01 | 4.48E-01 |
| 660.48589 | 52.94  | 14.53 | 17.58 | 16.79 | 15.69 | 1.45E-10 | 1.69E-10 | 2.19E-06 | 4.99E-02 | 2.88E-01 | 3.20E-04 | 7.70E-02 |
| 660.51196 | 51.85  | 16.64 | 15.24 | 13.89 | 15.70 | 5.98E-06 | 3.78E-02 | 1.28E-06 | 2.93E-01 | 5.55E-02 | 8.39E-01 | 5.68E-02 |
| 660.56331 | 44.22  | 18.40 | 17.45 | 17.11 | 17.82 | 9.03E-05 | 5.38E-03 | 4.86E-05 | 2.00E-01 | 6.56E-01 | 6.03E-01 | 8.48E-03 |
| 660.62827 | 276.11 | 16.06 | 16.22 | 16.29 | 16.08 | 8.54E-01 | 9.56E-01 | 8.69E-01 | 1.00E+00 | 9.95E-01 | 9.71E-01 | 9.04E-01 |
| 660.65449 | 47.24  | 14.92 | 17.88 | 17.92 | 17.92 | 2.68E-33 | 3.85E-14 | 3.72E-14 | 3.92E-14 | 9.98E-01 | 9.99E-01 | 1.00E+00 |
| 660.69073 | 44.97  | 12.05 | 14.11 | 14.46 | 14.02 | 4.31E-10 | 5.55E-07 | 2.55E-09 | 3.30E-06 | 7.89E-01 | 9.96E-01 | 6.73E-01 |
| 660.77065 | 276.22 | 15.71 | 15.87 | 16.03 | 15.38 | 2.64E-01 | 9.59E-01 | 7.46E-01 | 7.37E-01 | 9.62E-01 | 4.63E-01 | 2.11E-01 |
| 660.89549 | 46.75  | 16.86 | 16.03 | 16.60 | 14.76 | 8.55E-09 | 5.47E-02 | 8.59E-01 | 9.17E-09 | 3.11E-01 | 1.53E-03 | 9.30E-07 |
| 660.91546 | 276.36 | 15.46 | 16.62 | 16.44 | 16.06 | 3.26E-03 | 3.33E-03 | 1.61E-02 | 2.92E-01 | 9.58E-01 | 3.94E-01 | 6.91E-01 |
| 661.05574 | 275.93 | 15.19 | 15.34 | 15.60 | 15.79 | 4.15E-01 | 9.81E-01 | 6.88E-01 | 4.01E-01 | 8.99E-01 | 6.54E-01 | 9.62E-01 |
| 661.15026 | 279.26 | 15.46 | 14.89 | 15.21 | 15.45 | 2.69E-01 | 2.74E-01 | 8.55E-01 | 1.00E+00 | 7.56E-01 | 3.46E-01 | 8.93E-01 |
| 661.20173 | 277.97 | 15.65 | 15.26 | 15.45 | 15.59 | 6.59E-01 | 6.27E-01 | 9.25E-01 | 9.97E-01 | 9.41E-01 | 7.79E-01 | 9.78E-01 |
| 661.34995 | 279.5  | 16.18 | 17.14 | 17.20 | 16.88 | 4.93E-04 | 2.22E-03 | 8.95E-04 | 5.28E-02 | 9.97E-01 | 8.00E-01 | 6.78E-01 |
| 661.44811 | 27.48  | 9.71  | 14.09 | 11.22 | 14.01 | 6.86E-19 | 7.69E-14 | 1.28E-02 | 1.04E-13 | 3.20E-07 | 9.98E-01 | 1.43E-06 |
| 661.48034 | 277.6  | 15.42 | 15.30 | 15.05 | 15.57 | 6.49E-01 | 9.92E-01 | 7.92E-01 | 9.82E-01 | 9.28E-01 | 9.19E-01 | 6.01E-01 |
| 661.53035 | 278.88 | 14.93 | 14.45 | 14.53 | 14.63 | 3.48E-01 | 3.24E-01 | 4.86E-01 | 7.26E-01 | 9.92E-01 | 9.32E-01 | 9.88E-01 |
| 661.55528 | 277.52 | 13.58 | 14.82 | 15.19 | 14.80 | 9.83E-03 | 7.08E-02 | 7.92E-03 | 8.95E-02 | 8.88E-01 | 1.00E+00 | 8.81E-01 |
| 661.55867 | 24.31  | 17.20 | 9.40  | 11.16 | 11.82 | 2.29E-44 | 3.65E-14 | 3.65E-14 | 4.14E-14 | 7.81E-04 | 3.27E-06 | 4.91E-01 |
| 661.61481 | 276.26 | 15.09 | 15.60 | 15.83 | 15.53 | 1.88E-01 | 4.58E-01 | 1.37E-01 | 5.94E-01 | 9.13E-01 | 9.98E-01 | 8.47E-01 |
| 661.68392 | 276.73 | 15.80 | 16.36 | 16.02 | 16.35 | 2.25E-01 | 2.80E-01 | 9.03E-01 | 3.17E-01 | 6.97E-01 | 1.00E+00 | 7.30E-01 |
| 661.74507 | 279.11 | 15.51 | 16.71 | 16.48 | 16.77 | 4.96E-05 | 3.34E-04 | 5.25E-03 | 2.21E-04 | 8.69E-01 | 9.97E-01 | 7.77E-01 |
| 661.80887 | 43.18  | 8.56  | 9.80  | 8.91  | 11.47 | 1.65E-07 | 5.91E-02 | 8.87E-01 | 1.70E-07 | 2.94E-01 | 8.59E-03 | 8.99E-06 |
| 661.81243 | 277.05 | 15.09 | 15.44 | 15.33 | 15.88 | 2.73E-01 | 8.09E-01 | 9.30E-01 | 2.01E-01 | 9.92E-01 | 7.07E-01 | 5.28E-01 |
| 661.87224 | 55.44  | 16.56 | 11.71 | 10.13 | 11.01 | 6.63E-22 | 1.44E-12 | 7.21E-14 | 7.92E-14 | 6.48E-02 | 7.12E-01 | 5.30E-01 |
| 661.94953 | 279.24 | 15.37 | 14.99 | 15.07 | 15.68 | 2.14E-01 | 6.76E-01 | 8.09E-01 | 8.08E-01 | 9.95E-01 | 2.20E-01 | 3.19E-01 |
| 662.20576 | 75.43  | 14.90 | 19.30 | 16.70 | 17.98 | 1.17E-13 | 1.34E-13 | 3.95E-03 | 2.65E-07 | 1.76E-05 | 8.90E-02 | 1.00E-01 |
| 662.33329 | 119.79 | 7.49  | 14.57 | 13.84 | 13.78 | 2.96E-56 | 3.65E-14 | 3.65E-14 | 3.65E-14 | 2.00E-01 | 1.71E-01 | 9.99E-01 |
| 662.33769 | 265.77 | 13.29 | 14.85 | 15.28 | 15.06 | 2.86E-03 | 3.99E-02 | 3.77E-03 | 1.76E-02 | 8.88E-01 | 9.86E-01 | 9.85E-01 |
| 662.35032 | 272.39 | 15.75 | 14.87 | 15.00 | 15.30 | 2.87E-02 | 2.83E-02 | 7.62E-02 | 5.06E-01 | 9.79E-01 | 5.67E-01 | 7.93E-01 |
| 662.38054 | 51.74  | 11.79 | 12.35 | 11.79 | 12.63 | 1.74E-01 | 5.84E-01 | 1.00E+00 | 2.40E-01 | 6.07E-01 | 9.25E-01 | 2.62E-01 |
| 662.42728 | 47.14  | 15.44 | 12.14 | 11.49 | 12.59 | 3.37E-13 | 3.87E-09 | 1.47E-12 | 9.11E-07 | 6.02E-01 | 8.32E-01 | 1.68E-01 |
| 662.50811 | 49.34  | 18.08 | 19.46 | 18.50 | 18.57 | 1.60E-03 | 6.00E-04 | 6.23E-01 | 5.23E-01 | 3.82E-02 | 7.80E-02 | 9.97E-01 |
| 662.56979 | 30.24  | 18.70 | 12.45 | 14.22 | 13.59 | 1.27E-30 | 3.65E-14 | 7.42E-14 | 6.85E-14 | 1.89E-03 | 1.07E-01 | 5.89E-01 |
| 662.64514 | 46.21  | 10.03 | 12.65 | 13.16 | 13.41 | 6.77E-20 | 1.73E-11 | 7.53E-14 | 7.36E-14 | 4.87E-01 | 1.79E-01 | 9.11E-01 |
| 662.65639 | 62.94  | 14.69 | 17.73 | 17.24 | 17.63 | 1.68E-31 | 3.72E-14 | 6.85E-14 | 4.16E-14 | 2.09E-01 | 9.81E-01 | 4.26E-01 |
| 662.68409 | 44.82  | 8.89  | 11.42 | 11.99 | 12.26 | 2.80E-11 | 3.08E-06 | 5.66E-09 | 1.02E-09 | 6.68E-01 | 3.75E-01 | 9.55E-01 |
| 662.73908 | 62.39  | 13.60 | 12.11 | 11.73 | 13.69 | 2.83E-03 | 8.45E-02 | 1.47E-02 | 9.99E-01 | 9.31E-01 | 8.46E-02 | 1.65E-02 |
| 662.74758 | 50.51  | 10.72 | 11.02 | 10.64 | 12.80 | 1.81E-04 | 9.33E-01 | 9.99E-01 | 5.20E-04 | 8.81E-01 | 6.13E-03 | 4.09E-04 |
| 662.86341 | 52.53  | 14.56 | 12.99 | 13.16 | 12.70 | 9.49E-09 | 3.03E-06 | 3.15E-05 | 4.74E-08 | 9.49E-01 | 7.89E-01 | 4.60E-01 |
| 662.99298 | 53.6   | 11.57 | 14.75 | 12.43 | 13.22 | 5.07E-10 | 1.53E-10 | 2.26E-01 | 2.64E-03 | 6.50E-06 | 8.58E-03 | 3.44E-01 |
| 662.99998 | 121.59 | 11.44 | 13.44 | 12.93 | 13.20 | 5.75E-15 | 1.87E-13 | 1.65E-08 | 1.36E-10 | 1.84E-01 | 7.95E-01 | 7.24E-01 |
| 663.21406 | 75.1   | 10.76 | 12.35 | 9.85  | 10.72 | 4.59E-04 | 2.77E-02 | 3.75E-01 | 1.00E+00 | 1.51E-04 | 3.54E-02 | 4.69E-01 |
| 663.45353 | 22.32  | 19.58 | 17.90 | 18.93 | 18.42 | 4.14E-13 | 2.83E-13 | 9.14E-03 | 7.89E-07 | 1.40E-05 | 8.47E-02 | 9.39E-02 |
| 663.45393 | 195.31 | 15.71 | 11.52 | 12.90 | 11.56 | 1.01E-32 | 3.65E-14 | 7.72E-14 | 3.70E-14 | 2.49E-04 | 1.00E+00 | 5.60E-04 |
| 663.48421 | 53.6   | 7.48  | 12.32 | 10.63 | 11.27 | 2.06E-11 | 2.27E-11 | 1.50E-05 | 3.59E-07 | 6.19E-02 | 4.36E-01 | 7.91E-01 |
| 663.49313 | 46.66  | 15.92 | 16.65 | 14.09 | 14.97 | 2.56E-05 | 5.10E-01 | 2.82E-03 | 2.95E-01 | 2.01E-05 | 1.52E-02 | 3.75E-01 |

|           |        |       |       |       |       |          |          |          |          |          |          |          |
|-----------|--------|-------|-------|-------|-------|----------|----------|----------|----------|----------|----------|----------|
| 663.575   | 22.52  | 17.08 | 8.62  | 11.10 | 11.17 | 1.61E-36 | 3.65E-14 | 5.83E-14 | 7.03E-14 | 9.10E-05 | 1.04E-04 | 9.99E-01 |
| 663.68991 | 92.08  | 6.90  | 15.41 | 14.99 | 13.93 | 6.97E-62 | 3.65E-14 | 3.65E-14 | 3.65E-14 | 7.35E-01 | 3.11E-03 | 5.76E-02 |
| 663.85693 | 51.59  | 14.56 | 14.98 | 15.21 | 14.70 | 2.60E-01 | 6.20E-01 | 2.34E-01 | 9.77E-01 | 9.16E-01 | 8.79E-01 | 5.11E-01 |
| 663.91599 | 52.37  | 14.54 | 14.14 | 14.46 | 13.65 | 1.97E-02 | 5.27E-01 | 9.93E-01 | 1.85E-02 | 7.14E-01 | 3.95E-01 | 4.58E-02 |
| 664.01708 | 93.84  | 8.12  | 13.06 | 12.88 | 11.99 | 7.13E-36 | 3.65E-14 | 3.65E-14 | 7.01E-14 | 9.59E-01 | 2.69E-02 | 8.94E-02 |
| 664.03034 | 67.27  | 17.04 | 18.92 | 18.63 | 18.59 | 1.15E-03 | 1.69E-03 | 1.06E-02 | 1.83E-02 | 9.44E-01 | 9.29E-01 | 1.00E+00 |
| 664.11768 | 282.94 | 15.87 | 18.62 | 18.43 | 17.63 | 2.32E-18 | 7.49E-14 | 8.55E-14 | 2.44E-07 | 9.26E-01 | 1.14E-02 | 5.80E-02 |
| 664.14098 | 279.03 | 15.66 | 14.54 | 14.93 | 15.21 | 5.40E-03 | 2.71E-03 | 9.07E-02 | 5.03E-01 | 6.35E-01 | 1.94E-01 | 8.30E-01 |
| 664.17134 | 294.61 | 16.02 | 16.12 | 16.59 | 16.39 | 2.19E-01 | 9.87E-01 | 2.12E-01 | 6.14E-01 | 4.07E-01 | 8.21E-01 | 9.19E-01 |
| 664.35391 | 276.67 | 15.45 | 14.85 | 15.06 | 15.27 | 3.79E-01 | 3.30E-01 | 6.86E-01 | 9.59E-01 | 9.37E-01 | 6.80E-01 | 9.45E-01 |
| 664.35676 | 86.97  | 9.19  | 14.70 | 14.08 | 13.87 | 4.73E-32 | 3.65E-14 | 4.43E-14 | 6.61E-14 | 4.93E-01 | 2.65E-01 | 9.67E-01 |
| 664.42206 | 48.51  | 16.14 | 12.97 | 13.74 | 12.94 | 5.42E-18 | 7.93E-14 | 1.41E-09 | 8.67E-14 | 1.66E-01 | 1.00E+00 | 1.56E-01 |
| 664.46007 | 29.61  | 18.63 | 17.19 | 18.40 | 17.86 | 4.51E-11 | 8.09E-11 | 6.62E-01 | 1.52E-03 | 9.87E-08 | 9.96E-03 | 5.65E-02 |
| 664.51444 | 46.61  | 18.76 | 18.25 | 17.96 | 18.28 | 3.12E-03 | 8.57E-02 | 1.27E-03 | 1.26E-01 | 5.55E-01 | 1.00E+00 | 5.08E-01 |
| 664.54068 | 277.91 | 13.88 | 14.38 | 14.86 | 14.96 | 1.38E-01 | 7.54E-01 | 2.07E-01 | 1.62E-01 | 7.91E-01 | 7.01E-01 | 9.98E-01 |
| 664.60157 | 46.57  | 14.06 | 17.00 | 16.89 | 16.78 | 5.92E-20 | 7.41E-14 | 7.74E-14 | 2.10E-13 | 9.86E-01 | 9.21E-01 | 9.90E-01 |
| 664.65059 | 48.38  | 10.97 | 11.24 | 11.12 | 12.64 | 1.36E-04 | 8.95E-01 | 9.79E-01 | 1.70E-04 | 9.90E-01 | 3.45E-03 | 1.07E-03 |
| 664.74301 | 50.06  | 9.20  | 10.67 | 10.74 | 12.70 | 2.33E-11 | 5.00E-03 | 2.51E-03 | 1.54E-12 | 9.98E-01 | 1.06E-04 | 1.76E-04 |
| 664.90181 | 33.58  | 11.30 | 13.87 | 12.82 | 13.55 | 2.49E-05 | 3.21E-05 | 2.99E-02 | 5.61E-04 | 2.47E-01 | 9.45E-01 | 5.91E-01 |
| 664.91114 | 52.59  | 13.68 | 13.63 | 13.78 | 12.97 | 1.62E-01 | 9.99E-01 | 9.93E-01 | 2.38E-01 | 9.77E-01 | 3.35E-01 | 1.57E-01 |
| 664.9582  | 45.53  | 12.82 | 11.64 | 11.85 | 10.73 | 3.18E-03 | 1.28E-01 | 2.71E-01 | 1.13E-03 | 9.79E-01 | 3.83E-01 | 1.94E-01 |
| 665.03365 | 57.1   | 13.59 | 13.11 | 12.25 | 14.54 | 2.62E-02 | 9.07E-01 | 2.35E-01 | 5.75E-01 | 6.46E-01 | 2.40E-01 | 1.41E-02 |
| 665.12172 | 267.17 | 13.57 | 13.92 | 14.27 | 13.85 | 5.93E-01 | 8.99E-01 | 5.08E-01 | 9.48E-01 | 9.10E-01 | 9.99E-01 | 8.64E-01 |
| 665.17657 | 207.64 | 6.09  | 12.00 | 10.99 | 9.70  | 3.29E-19 | 7.45E-14 | 1.91E-13 | 1.12E-07 | 3.53E-01 | 2.13E-03 | 1.79E-01 |
| 665.46144 | 27.88  | 16.50 | 13.01 | 15.07 | 14.13 | 4.46E-17 | 7.51E-14 | 6.09E-04 | 9.37E-09 | 6.11E-07 | 2.07E-02 | 7.34E-02 |
| 665.47057 | 51.06  | 13.80 | 11.30 | 13.02 | 11.73 | 2.64E-06 | 6.93E-06 | 3.99E-01 | 4.32E-04 | 4.95E-03 | 8.50E-01 | 6.80E-02 |
| 665.51301 | 22.33  | 16.14 | 9.49  | 10.38 | 12.70 | 8.81E-32 | 3.65E-14 | 4.30E-14 | 8.82E-10 | 2.99E-01 | 3.13E-08 | 9.04E-05 |
| 665.85228 | 51.29  | 14.70 | 14.72 | 14.26 | 14.26 | 2.26E-01 | 1.00E+00 | 4.27E-01 | 4.59E-01 | 4.21E-01 | 4.51E-01 | 1.00E+00 |
| 665.91426 | 51     | 13.04 | 12.89 | 13.42 | 13.56 | 3.53E-01 | 9.84E-01 | 7.76E-01 | 5.87E-01 | 5.79E-01 | 3.99E-01 | 9.87E-01 |
| 666.03172 | 55.82  | 14.03 | 13.78 | 13.80 | 15.08 | 2.30E-01 | 9.82E-01 | 9.86E-01 | 4.21E-01 | 1.00E+00 | 2.60E-01 | 2.67E-01 |
| 666.51066 | 45.5   | 17.79 | 17.60 | 17.03 | 17.50 | 5.30E-02 | 9.08E-01 | 3.31E-02 | 7.38E-01 | 1.92E-01 | 9.85E-01 | 3.86E-01 |
| 666.59962 | 46.82  | 16.43 | 18.31 | 18.31 | 18.10 | 2.38E-27 | 5.67E-14 | 5.52E-14 | 7.47E-14 | 1.00E+00 | 6.24E-01 | 6.24E-01 |
| 667.03915 | 54.8   | 12.79 | 17.52 | 16.85 | 17.64 | 5.46E-17 | 1.93E-13 | 9.90E-11 | 2.02E-13 | 6.67E-01 | 9.97E-01 | 5.62E-01 |
| 667.14266 | 62.62  | 11.98 | 11.86 | 11.32 | 13.09 | 8.90E-03 | 9.95E-01 | 5.27E-01 | 1.27E-01 | 7.08E-01 | 8.67E-02 | 3.99E-03 |
| 667.2318  | 242.25 | 13.64 | 12.47 | 12.87 | 12.76 | 4.68E-02 | 3.42E-02 | 2.69E-01 | 1.89E-01 | 7.99E-01 | 9.21E-01 | 9.95E-01 |
| 667.4744  | 52.86  | 15.13 | 17.83 | 17.96 | 16.12 | 3.99E-15 | 1.92E-11 | 1.43E-12 | 4.66E-02 | 9.85E-01 | 8.56E-05 | 1.63E-05 |
| 667.53542 | 40.01  | 17.15 | 12.61 | 12.49 | 14.92 | 9.28E-12 | 1.63E-09 | 3.98E-10 | 9.60E-03 | 9.98E-01 | 8.94E-03 | 4.63E-03 |
| 667.9408  | 54.47  | 18.50 | 18.12 | 16.31 | 16.44 | 1.10E-08 | 7.83E-01 | 8.32E-07 | 9.70E-06 | 1.24E-04 | 7.67E-04 | 9.89E-01 |
| 667.97729 | 52.79  | 10.63 | 11.45 | 13.14 | 10.77 | 6.94E-06 | 3.85E-01 | 1.03E-05 | 9.93E-01 | 8.55E-03 | 6.06E-01 | 1.14E-04 |
| 668.03734 | 54.84  | 16.02 | 15.83 | 15.54 | 16.00 | 5.77E-01 | 9.62E-01 | 5.75E-01 | 1.00E+00 | 8.69E-01 | 9.75E-01 | 6.46E-01 |
| 668.35039 | 278.88 | 16.47 | 14.63 | 15.20 | 15.62 | 9.43E-07 | 3.45E-07 | 6.42E-04 | 5.60E-02 | 3.36E-01 | 2.52E-02 | 6.12E-01 |
| 668.47103 | 51.06  | 15.40 | 16.96 | 17.23 | 14.94 | 1.09E-05 | 1.23E-02 | 1.90E-03 | 8.11E-01 | 9.56E-01 | 1.19E-03 | 1.47E-04 |
| 668.50112 | 45.28  | 13.88 | 12.13 | 11.37 | 12.17 | 8.19E-07 | 8.05E-04 | 3.45E-07 | 1.55E-03 | 3.53E-01 | 1.00E+00 | 3.34E-01 |
| 668.51901 | 44.05  | 16.02 | 15.25 | 13.44 | 16.18 | 1.88E-09 | 2.80E-01 | 3.20E-08 | 9.84E-01 | 3.02E-04 | 1.77E-01 | 3.10E-08 |
| 668.59718 | 46.86  | 16.05 | 18.06 | 18.02 | 17.97 | 7.65E-28 | 5.72E-14 | 6.10E-14 | 7.27E-14 | 9.95E-01 | 9.59E-01 | 9.94E-01 |
| 668.68846 | 47.5   | 13.70 | 16.09 | 15.67 | 16.63 | 1.30E-11 | 4.16E-08 | 6.53E-06 | 5.30E-11 | 7.29E-01 | 5.66E-01 | 9.71E-02 |
| 668.93405 | 52.49  | 17.60 | 19.64 | 19.36 | 18.75 | 1.28E-13 | 1.02E-12 | 3.61E-10 | 1.33E-04 | 7.33E-01 | 7.55E-03 | 1.10E-01 |
| 669.54528 | 22.67  | 15.15 | 8.51  | 9.78  | 11.18 | 8.29E-25 | 4.39E-14 | 7.29E-14 | 7.09E-10 | 1.37E-01 | 9.54E-05 | 9.29E-02 |
| 669.59498 | 48.74  | 11.58 | 11.62 | 12.41 | 12.25 | 7.56E-02 | 9.99E-01 | 1.30E-01 | 3.25E-01 | 1.92E-01 | 4.18E-01 | 9.78E-01 |
| 669.80348 | 50.56  | 14.48 | 16.98 | 17.12 | 15.77 | 5.49E-19 | 8.12E-14 | 7.38E-14 | 1.16E-04 | 9.67E-01 | 5.75E-04 | 8.04E-05 |
| 669.92764 | 52.5   | 13.07 | 11.78 | 12.12 | 13.02 | 8.63E-03 | 2.04E-02 | 1.32E-01 | 9.99E-01 | 8.82E-01 | 4.41E-02 | 2.14E-01 |
| 669.93797 | 56.61  | 14.94 | 16.59 | 14.96 | 15.71 | 4.17E-03 | 6.43E-03 | 1.00E+00 | 4.39E-01 | 9.69E-03 | 3.53E-01 | 4.90E-01 |
| 670.04455 | 53.3   | 18.89 | 21.81 | 21.59 | 20.85 | 5.65E-23 | 6.98E-14 | 7.47E-14 | 3.81E-10 | 8.59E-01 | 6.92E-03 | 5.93E-02 |
| 670.36295 | 49.59  | 10.67 | 11.98 | 11.98 | 12.57 | 9.49E-04 | 2.91E-02 | 2.70E-02 | 6.21E-04 | 1.00E+00 | 6.36E-01 | 6.30E-01 |
| 670.42707 | 28.15  | 13.62 | 19.32 | 17.46 | 18.57 | 1.23E-68 | 3.65E-14 | 3.65E-14 | 3.65E-14 | 6.74E-13 | 1.21E-02 | 3.61E-05 |
| 670.47061 | 50.28  | 17.20 | 19.09 | 18.42 | 17.48 | 5.29E-06 | 1.00E-05 | 8.72E-03 | 8.97E-01 | 3.18E-01 | 5.63E-04 | 9.48E-02 |
| 670.5431  | 46.93  | 16.63 | 18.41 | 17.79 | 17.98 | 1.46E-05 | 8.82E-06 | 7.47E-03 | 1.77E-03 | 3.28E-01 | 6.76E-01 | 9.54E-01 |
| 670.59717 | 47.36  | 13.59 | 16.00 | 15.91 | 15.96 | 1.02E-13 | 9.13E-11 | 2.59E-10 | 5.14E-10 | 9.95E-01 | 1.00E+00 | 9.99E-01 |
| 670.68479 | 47.59  | 14.07 | 17.00 | 16.76 | 17.38 | 9.70E-21 | 7.74E-14 | 2.71E-13 | 7.49E-14 | 9.04E-01 | 7.01E-01 | 2.98E-01 |
| 670.71918 | 45.86  | 11.98 | 14.78 | 14.89 | 15.17 | 4.70E-14 | 1.15E-09 | 1.64E-10 | 1.61E-11 | 9.93E-01 | 8.18E-01 | 9.25E-01 |
| 670.77976 | 276.68 | 15.69 | 15.88 | 15.77 | 15.69 | 8.77E-01 | 8.78E-01 | 9.88E-01 | 1.00E+00 | 9.76E-01 | 9.02E-01 | 9.92E-01 |
| 670.81035 | 50.36  | 13.73 | 13.16 | 13.31 | 13.93 | 4.49E-02 | 2.04E-01 | 4.66E-01 | 9.08E-01 | 9.56E-01 | 6.13E-02 | 1.80E-01 |
| 670.92337 | 276.72 | 12.43 | 16.37 | 16.10 | 15.78 | 8.67E-13 | 6.79E-11 | 7.63E-10 | 6.42E-08 | 9.66E-01 | 7.45E-01 | 9.44E-01 |
| 670.92965 | 42.55  | 16.47 | 19.55 | 18.28 | 18.58 | 2.11E-21 | 5.78E-14 | 2.38E-09 | 2.07E-11 | 8.88E-05 | 6.83E-03 | 7.37E-01 |
| 671.04574 | 53.18  | 16.25 | 19.09 | 18.81 | 17.86 | 2.33E-19 | 7.45E-14 | 8.07E-14 | 1.85E-06 | 7.86E-01 | 7.07E-04 | 1.44E-02 |
| 671.06643 | 277.07 | 16.13 | 15.53 | 15.45 | 15.35 | 8.83E-02 | 2.69E-01 | 1.69E-01 | 1.04E-01 | 9.96E-01 | 9.58E-01 | 9.91E-01 |
| 671.09732 | 70.79  | 10.83 | 11.96 | 13.86 | 9.76  | 2.85E-08 | 2.84E-01 | 1.61E-05 | 3.60E-01 | 2.03E-02 | 6.76E-03 | 2.22E-08 |
| 671.10648 | 73.22  | 12.03 | 11.71 | 12.63 | 10.63 | 2.56E-04 | 8.82E-01 | 4.96E-01 | 9.23E-03 | 1.62E-01 | 8.39E-02 | 8.67E-05 |

|           |        |       |       |       |       |          |          |          |          |          |          |          |
|-----------|--------|-------|-------|-------|-------|----------|----------|----------|----------|----------|----------|----------|
| 671.12289 | 145.78 | 7.73  | 15.48 | 14.35 | 12.97 | 1.00E-49 | 3.65E-14 | 3.65E-14 | 3.72E-14 | 4.27E-02 | 2.16E-07 | 9.21E-03 |
| 671.20697 | 276.64 | 15.36 | 15.38 | 15.78 | 15.89 | 1.14E-01 | 1.00E+00 | 3.64E-01 | 1.96E-01 | 4.42E-01 | 2.54E-01 | 9.78E-01 |
| 671.37025 | 52.02  | 11.36 | 12.55 | 13.00 | 12.44 | 2.26E-03 | 3.80E-02 | 1.24E-03 | 8.22E-02 | 7.46E-01 | 9.96E-01 | 6.20E-01 |
| 671.43401 | 27.53  | 8.40  | 19.04 | 16.05 | 17.88 | 1.77E-56 | 3.65E-14 | 3.65E-14 | 3.65E-14 | 3.29E-07 | 1.54E-01 | 4.96E-03 |
| 671.47727 | 52.24  | 15.58 | 17.66 | 16.93 | 16.49 | 7.19E-11 | 1.62E-11 | 1.31E-05 | 1.00E-02 | 5.82E-02 | 6.19E-04 | 4.33E-01 |
| 671.79934 | 50.57  | 15.56 | 17.57 | 17.79 | 16.49 | 1.58E-16 | 3.48E-12 | 8.42E-14 | 3.83E-03 | 8.43E-01 | 7.31E-04 | 2.29E-05 |
| 671.90056 | 52.28  | 13.58 | 10.75 | 12.39 | 10.91 | 1.56E-08 | 1.61E-07 | 7.11E-02 | 1.61E-06 | 6.95E-03 | 9.90E-01 | 2.27E-02 |
| 671.93558 | 27.25  | 10.06 | 16.00 | 14.01 | 15.42 | 3.68E-28 | 3.76E-14 | 1.98E-13 | 6.45E-14 | 5.24E-04 | 6.75E-01 | 3.20E-02 |
| 672.03948 | 53.06  | 16.40 | 19.26 | 19.07 | 18.52 | 3.05E-20 | 7.53E-14 | 7.38E-14 | 2.83E-10 | 9.19E-01 | 8.66E-02 | 2.93E-01 |
| 672.10793 | 172.33 | 8.64  | 15.35 | 15.59 | 12.90 | 2.40E-31 | 3.76E-14 | 3.67E-14 | 6.72E-12 | 9.74E-01 | 2.15E-04 | 3.20E-05 |
| 672.12968 | 142.95 | 6.82  | 11.06 | 10.54 | 8.98  | 1.60E-20 | 7.37E-14 | 7.61E-14 | 8.90E-06 | 6.29E-01 | 3.77E-05 | 3.19E-03 |
| 672.43836 | 27.46  | 9.67  | 16.07 | 13.18 | 15.08 | 8.42E-37 | 3.65E-14 | 1.27E-13 | 3.72E-14 | 1.39E-09 | 1.31E-01 | 1.62E-04 |
| 672.45246 | 39.03  | 16.38 | 18.89 | 17.21 | 18.17 | 2.39E-22 | 5.12E-14 | 1.19E-03 | 1.31E-12 | 2.33E-11 | 1.37E-02 | 3.46E-04 |
| 672.54253 | 46.13  | 18.01 | 18.66 | 18.33 | 18.36 | 1.34E-02 | 5.26E-03 | 3.44E-01 | 3.06E-01 | 3.50E-01 | 4.54E-01 | 9.99E-01 |
| 672.63321 | 278.79 | 15.42 | 14.92 | 15.21 | 15.38 | 4.71E-01 | 4.47E-01 | 9.17E-01 | 9.99E-01 | 8.42E-01 | 5.80E-01 | 9.64E-01 |
| 672.68405 | 48.67  | 10.92 | 12.23 | 12.49 | 13.39 | 4.09E-09 | 1.81E-03 | 9.22E-05 | 9.16E-10 | 8.96E-01 | 1.32E-02 | 7.97E-02 |
| 672.71559 | 45.73  | 11.27 | 12.73 | 12.08 | 14.14 | 4.91E-06 | 3.04E-02 | 4.02E-01 | 1.46E-06 | 6.29E-01 | 5.62E-02 | 1.37E-03 |
| 672.77292 | 44.39  | 11.26 | 9.68  | 10.12 | 11.63 | 4.12E-03 | 3.55E-02 | 1.95E-01 | 9.27E-01 | 8.86E-01 | 9.62E-03 | 6.62E-02 |
| 672.77945 | 279.21 | 13.80 | 15.19 | 15.26 | 14.87 | 8.62E-03 | 2.11E-02 | 1.28E-02 | 1.32E-01 | 9.99E-01 | 9.23E-01 | 8.70E-01 |
| 672.81434 | 41.28  | 13.59 | 12.49 | 12.37 | 13.20 | 8.09E-05 | 1.51E-03 | 2.43E-04 | 5.74E-01 | 9.74E-01 | 1.12E-01 | 3.82E-02 |
| 672.8963  | 54.24  | 17.72 | 15.09 | 15.47 | 13.87 | 1.22E-07 | 2.24E-04 | 2.01E-03 | 4.83E-08 | 9.33E-01 | 2.55E-01 | 7.22E-02 |
| 672.94876 | 27.28  | 8.77  | 15.89 | 12.86 | 15.13 | 2.97E-36 | 3.65E-14 | 9.58E-14 | 3.67E-14 | 3.04E-08 | 4.52E-01 | 8.16E-05 |
| 673.04386 | 53.82  | 12.68 | 13.34 | 13.16 | 13.40 | 2.30E-01 | 3.09E-01 | 5.79E-01 | 2.52E-01 | 9.68E-01 | 9.99E-01 | 9.30E-01 |
| 673.09013 | 250.67 | 14.58 | 13.66 | 15.56 | 14.25 | 9.18E-03 | 3.36E-01 | 2.68E-01 | 9.36E-01 | 4.42E-03 | 7.39E-01 | 1.04E-01 |
| 673.11057 | 180.45 | 6.65  | 11.80 | 11.66 | 9.42  | 4.48E-33 | 3.65E-14 | 3.67E-14 | 5.17E-10 | 9.86E-01 | 2.30E-07 | 9.79E-07 |
| 673.12373 | 77.64  | 7.59  | 10.69 | 9.80  | 9.01  | 4.22E-08 | 1.83E-08 | 8.37E-05 | 3.13E-02 | 3.05E-01 | 9.75E-03 | 4.48E-01 |
| 673.44923 | 34.5   | 14.40 | 14.97 | 13.05 | 14.03 | 7.45E-04 | 5.99E-01 | 1.64E-02 | 8.61E-01 | 3.30E-04 | 2.16E-01 | 1.72E-01 |
| 673.4835  | 53.29  | 15.46 | 18.04 | 15.62 | 16.42 | 1.87E-08 | 4.98E-08 | 9.81E-01 | 1.36E-01 | 6.78E-07 | 2.54E-03 | 2.96E-01 |
| 673.7976  | 50.51  | 13.84 | 13.51 | 13.57 | 13.14 | 9.59E-02 | 6.12E-01 | 7.46E-01 | 5.40E-02 | 9.96E-01 | 5.49E-01 | 4.08E-01 |
| 673.88669 | 53.11  | 15.36 | 13.79 | 13.65 | 13.83 | 3.81E-13 | 1.50E-09 | 2.96E-11 | 9.01E-09 | 9.35E-01 | 9.99E-01 | 8.87E-01 |
| 673.98535 | 53.38  | 11.43 | 14.06 | 11.00 | 13.30 | 6.14E-07 | 8.92E-05 | 8.84E-01 | 1.31E-02 | 6.06E-06 | 6.21E-01 | 1.63E-03 |
| 674.09876 | 193.92 | 8.81  | 13.41 | 13.14 | 12.57 | 8.18E-19 | 7.41E-14 | 8.34E-14 | 5.58E-11 | 9.56E-01 | 4.05E-01 | 7.08E-01 |
| 674.10512 | 212.58 | 7.12  | 11.74 | 12.02 | 11.88 | 2.00E-23 | 7.38E-14 | 7.45E-14 | 7.47E-14 | 9.45E-01 | 9.93E-01 | 9.93E-01 |
| 674.12514 | 288.71 | 16.12 | 14.19 | 14.78 | 14.76 | 2.85E-04 | 1.56E-04 | 1.57E-02 | 1.93E-02 | 5.73E-01 | 6.21E-01 | 1.00E+00 |
| 674.28899 | 294.73 | 14.76 | 14.04 | 14.71 | 13.05 | 3.67E-03 | 4.66E-01 | 1.00E+00 | 4.75E-03 | 5.49E-01 | 2.31E-01 | 8.35E-03 |
| 674.4548  | 293.48 | 12.29 | 13.36 | 14.58 | 11.53 | 3.20E-04 | 4.26E-01 | 6.29E-03 | 7.13E-01 | 3.26E-01 | 6.82E-02 | 2.81E-04 |
| 674.45749 | 44.95  | 14.58 | 12.32 | 12.50 | 11.85 | 7.43E-06 | 3.57E-04 | 1.13E-03 | 1.68E-05 | 9.88E-01 | 8.54E-01 | 6.72E-01 |
| 674.48109 | 60.54  | 12.49 | 13.86 | 11.48 | 12.52 | 1.09E-05 | 1.19E-02 | 9.41E-02 | 1.00E+00 | 1.88E-06 | 2.32E-02 | 1.12E-01 |
| 674.54157 | 46.29  | 17.45 | 18.58 | 18.33 | 17.96 | 6.30E-03 | 4.82E-03 | 4.26E-02 | 4.45E-01 | 8.84E-01 | 3.05E-01 | 7.24E-01 |
| 674.63141 | 46.84  | 15.35 | 17.04 | 16.79 | 17.26 | 2.20E-16 | 2.91E-12 | 1.59E-09 | 1.00E-13 | 6.86E-01 | 7.92E-01 | 1.87E-01 |
| 674.87126 | 52.65  | 17.10 | 11.33 | 12.86 | 11.44 | 2.69E-20 | 7.65E-14 | 1.36E-10 | 7.47E-14 | 6.72E-02 | 9.98E-01 | 1.19E-01 |
| 675.02653 | 54.91  | 13.23 | 13.68 | 13.31 | 15.50 | 2.55E-02 | 9.40E-01 | 1.00E+00 | 2.80E-02 | 9.68E-01 | 1.33E-01 | 4.37E-02 |
| 675.11281 | 64.61  | 11.92 | 14.76 | 12.57 | 13.01 | 1.12E-05 | 4.25E-06 | 6.39E-01 | 2.30E-01 | 9.16E-04 | 1.70E-02 | 8.79E-01 |
| 675.45816 | 52.22  | 14.13 | 13.21 | 14.53 | 12.63 | 4.50E-05 | 1.15E-01 | 7.56E-01 | 2.44E-03 | 1.00E-02 | 5.37E-01 | 8.90E-05 |
| 675.88098 | 53.77  | 15.66 | 13.16 | 13.12 | 13.08 | 4.62E-13 | 1.08E-09 | 3.81E-10 | 8.60E-10 | 9.99E-01 | 9.97E-01 | 1.00E+00 |
| 676.02612 | 54.79  | 12.61 | 11.61 | 11.60 | 14.45 | 1.72E-03 | 5.70E-01 | 5.52E-01 | 9.45E-02 | 1.00E+00 | 3.39E-03 | 2.91E-03 |
| 676.08132 | 266.04 | 13.32 | 14.13 | 14.51 | 14.75 | 4.09E-02 | 4.07E-01 | 1.00E-01 | 3.96E-02 | 8.93E-01 | 6.73E-01 | 9.71E-01 |
| 676.33264 | 266.1  | 15.04 | 15.81 | 16.22 | 15.80 | 4.98E-04 | 3.36E-02 | 1.91E-04 | 4.66E-02 | 4.83E-01 | 1.00E+00 | 4.73E-01 |
| 676.3571  | 279.86 | 15.13 | 14.91 | 15.23 | 15.54 | 5.08E-01 | 9.44E-01 | 9.94E-01 | 7.36E-01 | 8.57E-01 | 4.27E-01 | 8.73E-01 |
| 676.40398 | 44.1   | 16.03 | 11.72 | 11.71 | 12.82 | 2.08E-28 | 4.45E-14 | 4.19E-14 | 1.15E-13 | 1.00E+00 | 2.77E-02 | 2.39E-02 |
| 676.45769 | 52.34  | 14.06 | 11.54 | 13.00 | 10.61 | 8.11E-09 | 3.36E-05 | 2.03E-01 | 1.71E-08 | 4.41E-02 | 3.75E-01 | 2.29E-04 |
| 676.49902 | 280.91 | 15.54 | 14.52 | 14.81 | 15.00 | 9.58E-02 | 6.69E-02 | 2.87E-01 | 5.75E-01 | 8.99E-01 | 6.94E-01 | 9.74E-01 |
| 676.53946 | 46.48  | 17.11 | 17.60 | 17.23 | 17.66 | 2.75E-02 | 9.41E-02 | 9.47E-01 | 5.87E-02 | 3.02E-01 | 9.95E-01 | 2.09E-01 |
| 676.58596 | 265.56 | 15.61 | 16.05 | 16.21 | 16.59 | 1.91E-02 | 4.68E-01 | 1.92E-01 | 9.55E-03 | 9.55E-01 | 3.29E-01 | 6.23E-01 |
| 676.62914 | 46.94  | 15.95 | 18.05 | 18.06 | 18.21 | 3.72E-40 | 3.65E-14 | 3.65E-14 | 3.65E-14 | 1.00E+00 | 7.88E-01 | 7.99E-01 |
| 676.63176 | 278.2  | 14.04 | 14.91 | 14.74 | 15.25 | 7.51E-02 | 2.43E-01 | 4.25E-01 | 5.43E-02 | 9.85E-01 | 8.93E-01 | 7.14E-01 |
| 676.87126 | 41.31  | 15.92 | 17.14 | 16.33 | 16.26 | 2.12E-03 | 8.79E-04 | 5.63E-01 | 7.23E-01 | 6.23E-02 | 4.55E-02 | 9.97E-01 |
| 676.92067 | 52.26  | 13.55 | 13.84 | 13.24 | 13.91 | 2.26E-01 | 8.28E-01 | 7.99E-01 | 7.30E-01 | 3.18E-01 | 9.97E-01 | 2.44E-01 |
| 677.04363 | 278.52 | 15.70 | 14.01 | 15.00 | 15.27 | 1.33E-03 | 5.47E-04 | 3.50E-01 | 7.63E-01 | 1.05E-01 | 2.76E-02 | 9.30E-01 |
| 677.19815 | 304.82 | 15.89 | 16.75 | 15.71 | 15.26 | 2.54E-04 | 4.12E-02 | 9.43E-01 | 2.17E-01 | 1.02E-02 | 1.03E-04 | 5.26E-01 |
| 677.35332 | 273.47 | 16.10 | 15.95 | 16.05 | 16.20 | 8.84E-01 | 9.58E-01 | 9.98E-01 | 9.87E-01 | 9.87E-01 | 8.55E-01 | 9.63E-01 |
| 677.49417 | 275.43 | 15.18 | 16.23 | 16.17 | 16.15 | 1.14E-02 | 2.32E-02 | 3.53E-02 | 5.10E-02 | 9.98E-01 | 9.97E-01 | 1.00E+00 |
| 677.64066 | 273.26 | 16.08 | 15.37 | 15.66 | 15.79 | 1.51E-01 | 9.98E-02 | 5.06E-01 | 7.93E-01 | 8.02E-01 | 5.75E-01 | 9.77E-01 |
| 677.69926 | 307.52 | 14.92 | 15.31 | 14.49 | 14.16 | 1.24E-02 | 6.75E-01 | 5.88E-01 | 1.44E-01 | 9.72E-02 | 1.05E-02 | 8.05E-01 |
| 677.77624 | 274.96 | 14.80 | 14.61 | 15.04 | 15.05 | 5.79E-01 | 9.44E-01 | 9.10E-01 | 9.01E-01 | 6.32E-01 | 6.29E-01 | 1.00E+00 |
| 677.91974 | 52.36  | 14.55 | 16.13 | 15.31 | 15.67 | 3.15E-03 | 1.59E-03 | 2.76E-01 | 5.53E-02 | 2.47E-01 | 7.41E-01 | 8.58E-01 |
| 677.92233 | 274.79 | 15.79 | 15.47 | 15.53 | 15.65 | 8.39E-01 | 8.30E-01 | 8.99E-01 | 9.86E-01 | 9.99E-01 | 9.65E-01 | 9.89E-01 |
| 678.03145 | 53.5   | 13.79 | 17.94 | 17.77 | 17.51 | 1.06E-23 | 7.29E-14 | 7.44E-14 | 7.67E-14 | 9.79E-01 | 7.60E-01 | 9.30E-01 |

|           |        |       |       |       |       |          |          |          |          |          |          |          |
|-----------|--------|-------|-------|-------|-------|----------|----------|----------|----------|----------|----------|----------|
| 678.1821  | 75.85  | 12.12 | 13.25 | 11.81 | 12.47 | 3.07E-02 | 9.64E-02 | 9.17E-01 | 8.96E-01 | 2.19E-02 | 4.32E-01 | 5.67E-01 |
| 678.213   | 290.55 | 12.24 | 12.68 | 13.49 | 13.43 | 2.78E-01 | 9.31E-01 | 3.19E-01 | 4.00E-01 | 7.09E-01 | 7.78E-01 | 1.00E+00 |
| 678.46964 | 53.65  | 15.54 | 17.53 | 17.64 | 16.04 | 6.41E-07 | 4.79E-05 | 1.33E-05 | 6.82E-01 | 9.95E-01 | 7.57E-03 | 3.19E-03 |
| 678.5013  | 35.87  | 18.93 | 17.31 | 17.08 | 17.07 | 4.36E-16 | 2.28E-10 | 4.63E-13 | 1.45E-12 | 7.76E-01 | 7.52E-01 | 1.00E+00 |
| 678.533   | 51.8   | 13.03 | 15.16 | 14.42 | 14.65 | 6.69E-05 | 4.09E-05 | 1.39E-02 | 4.30E-03 | 4.07E-01 | 7.22E-01 | 9.67E-01 |
| 678.62737 | 46.92  | 13.97 | 17.53 | 17.53 | 17.74 | 3.36E-21 | 7.58E-14 | 7.45E-14 | 7.47E-14 | 1.00E+00 | 9.56E-01 | 9.59E-01 |
| 678.71613 | 47.52  | 13.22 | 14.05 | 13.75 | 15.78 | 3.90E-05 | 3.79E-01 | 7.35E-01 | 1.63E-05 | 9.39E-01 | 9.94E-03 | 1.34E-01 |
| 678.72732 | 50.3   | 9.89  | 11.96 | 10.90 | 12.88 | 6.06E-06 | 2.09E-03 | 2.90E-01 | 4.57E-06 | 2.68E-01 | 4.28E-01 | 6.10E-03 |
| 678.7786  | 278.27 | 15.69 | 16.80 | 16.98 | 16.52 | 2.42E-04 | 2.64E-03 | 2.53E-04 | 5.07E-02 | 9.41E-01 | 8.32E-01 | 4.95E-01 |
| 678.8722  | 39.65  | 12.04 | 13.23 | 11.02 | 12.00 | 1.63E-03 | 1.24E-01 | 2.20E-01 | 1.00E+00 | 4.63E-04 | 1.40E-01 | 3.01E-01 |
| 678.91299 | 53.38  | 11.87 | 11.35 | 10.00 | 14.19 | 2.58E-07 | 8.60E-01 | 2.54E-02 | 4.41E-03 | 2.00E-01 | 4.27E-04 | 4.75E-08 |
| 678.92284 | 276.76 | 15.72 | 18.85 | 19.02 | 17.91 | 2.06E-21 | 7.54E-14 | 7.46E-14 | 5.17E-09 | 9.59E-01 | 3.88E-02 | 8.70E-03 |
| 678.96305 | 54.09  | 17.58 | 19.09 | 18.05 | 16.64 | 2.03E-04 | 1.99E-02 | 8.02E-01 | 2.84E-01 | 1.99E-01 | 6.74E-05 | 4.89E-02 |
| 679.03005 | 53.39  | 12.15 | 16.58 | 16.15 | 16.24 | 7.25E-14 | 1.28E-11 | 6.03E-10 | 1.05E-09 | 8.97E-01 | 9.49E-01 | 9.99E-01 |
| 679.06577 | 279.12 | 16.10 | 19.94 | 19.92 | 19.12 | 1.28E-25 | 6.43E-14 | 6.32E-14 | 1.54E-13 | 1.00E+00 | 1.36E-01 | 1.43E-01 |
| 679.21021 | 276.88 | 16.02 | 19.48 | 19.58 | 18.45 | 4.16E-24 | 7.29E-14 | 6.67E-14 | 1.41E-10 | 9.92E-01 | 2.19E-02 | 8.82E-03 |
| 679.35356 | 276.89 | 16.16 | 18.76 | 18.68 | 17.84 | 7.42E-13 | 3.79E-11 | 1.05E-10 | 4.83E-05 | 9.96E-01 | 7.36E-02 | 1.19E-01 |
| 679.45912 | 53.06  | 13.71 | 13.37 | 13.63 | 13.14 | 3.32E-01 | 7.23E-01 | 9.95E-01 | 3.30E-01 | 8.59E-01 | 9.14E-01 | 4.82E-01 |
| 679.46787 | 50.15  | 15.41 | 16.50 | 16.42 | 16.31 | 8.69E-04 | 1.88E-03 | 4.57E-03 | 1.95E-02 | 9.92E-01 | 9.31E-01 | 9.87E-01 |
| 679.49707 | 278.47 | 16.18 | 16.34 | 16.44 | 16.08 | 6.77E-01 | 9.56E-01 | 8.21E-01 | 9.89E-01 | 9.87E-01 | 8.56E-01 | 6.69E-01 |
| 679.50981 | 25.62  | 16.53 | 11.29 | 10.49 | 11.82 | 3.93E-30 | 6.03E-14 | 3.67E-14 | 7.54E-14 | 3.63E-01 | 7.25E-01 | 4.35E-02 |
| 679.53035 | 52.47  | 11.10 | 11.42 | 10.57 | 12.25 | 5.22E-02 | 9.49E-01 | 7.85E-01 | 2.17E-01 | 4.79E-01 | 5.23E-01 | 3.03E-02 |
| 679.64295 | 276.14 | 15.95 | 15.60 | 15.78 | 15.61 | 5.69E-01 | 5.98E-01 | 9.37E-01 | 6.45E-01 | 9.15E-01 | 1.00E+00 | 9.33E-01 |
| 679.78244 | 278.08 | 15.46 | 15.50 | 15.74 | 15.52 | 7.54E-01 | 9.99E-01 | 7.40E-01 | 9.97E-01 | 8.29E-01 | 1.00E+00 | 8.68E-01 |
| 679.83239 | 50.67  | 13.27 | 12.34 | 12.37 | 11.89 | 6.73E-02 | 2.71E-01 | 2.90E-01 | 4.86E-02 | 1.00E+00 | 8.50E-01 | 8.20E-01 |
| 679.94666 | 153.83 | 6.80  | 10.62 | 11.72 | 9.52  | 5.57E-18 | 1.44E-11 | 7.42E-14 | 3.20E-06 | 1.55E-01 | 1.88E-01 | 3.68E-04 |
| 679.96547 | 53.73  | 15.20 | 15.83 | 14.04 | 14.23 | 6.43E-04 | 5.28E-01 | 6.18E-02 | 1.80E-01 | 1.30E-03 | 7.25E-03 | 9.82E-01 |
| 679.9997  | 53     | 13.80 | 8.70  | 8.36  | 13.58 | 2.29E-20 | 1.31E-12 | 1.04E-13 | 9.88E-01 | 9.56E-01 | 1.14E-10 | 3.99E-12 |
| 680.48589 | 32.76  | 19.63 | 18.20 | 18.85 | 18.80 | 1.13E-11 | 1.16E-12 | 1.26E-04 | 7.73E-05 | 3.57E-03 | 1.20E-02 | 9.94E-01 |
| 680.57386 | 44.27  | 16.46 | 17.68 | 17.24 | 17.92 | 3.63E-04 | 3.55E-03 | 1.17E-01 | 4.23E-04 | 6.15E-01 | 9.17E-01 | 2.57E-01 |
| 680.58397 | 280.62 | 15.76 | 14.72 | 14.55 | 14.98 | 2.13E-01 | 3.33E-01 | 2.01E-01 | 6.06E-01 | 9.94E-01 | 9.79E-01 | 9.13E-01 |
| 680.62512 | 47.82  | 10.45 | 12.08 | 12.19 | 12.96 | 6.75E-06 | 4.25E-03 | 1.66E-03 | 3.65E-06 | 9.96E-01 | 2.97E-01 | 4.10E-01 |
| 680.6327  | 282.57 | 14.21 | 15.11 | 14.98 | 15.57 | 1.47E-01 | 4.12E-01 | 5.34E-01 | 1.05E-01 | 9.97E-01 | 8.74E-01 | 7.70E-01 |
| 680.70394 | 44.62  | 14.16 | 12.24 | 12.32 | 13.39 | 1.36E-06 | 1.23E-05 | 2.33E-05 | 2.30E-01 | 9.98E-01 | 3.15E-02 | 4.77E-02 |
| 680.71443 | 47.51  | 11.62 | 14.63 | 14.77 | 16.48 | 7.43E-15 | 4.05E-07 | 8.15E-08 | 7.80E-14 | 9.94E-01 | 7.41E-03 | 1.46E-02 |
| 680.84334 | 43.15  | 12.69 | 14.04 | 13.16 | 15.21 | 1.45E-07 | 8.91E-03 | 6.84E-01 | 1.23E-07 | 1.77E-01 | 4.47E-02 | 3.50E-05 |
| 680.92728 | 38.51  | 12.92 | 17.72 | 16.81 | 15.61 | 9.85E-29 | 3.67E-14 | 7.21E-14 | 1.85E-10 | 8.66E-02 | 1.74E-06 | 1.46E-02 |
| 680.93153 | 190.13 | 5.56  | 12.78 | 12.20 | 11.39 | 3.16E-55 | 3.65E-14 | 3.65E-14 | 3.65E-14 | 4.28E-01 | 2.78E-03 | 1.62E-01 |
| 680.96131 | 54.83  | 13.54 | 11.99 | 9.29  | 10.50 | 6.80E-10 | 6.67E-02 | 4.65E-10 | 2.50E-05 | 2.28E-04 | 1.17E-01 | 2.58E-01 |
| 681.03526 | 52.57  | 14.05 | 18.73 | 17.95 | 17.86 | 4.53E-20 | 7.49E-14 | 1.75E-13 | 1.91E-12 | 3.83E-01 | 3.18E-01 | 9.98E-01 |
| 681.17623 | 282.95 | 16.33 | 14.91 | 14.69 | 15.57 | 3.81E-02 | 1.00E-01 | 3.81E-02 | 6.30E-01 | 9.85E-01 | 7.40E-01 | 5.20E-01 |
| 681.2243  | 282.4  | 16.52 | 15.58 | 14.90 | 15.99 | 2.01E-02 | 2.79E-01 | 1.08E-02 | 7.58E-01 | 5.84E-01 | 8.81E-01 | 1.97E-01 |
| 681.2679  | 283.13 | 16.78 | 14.90 | 14.52 | 15.61 | 2.57E-04 | 3.66E-03 | 2.30E-04 | 1.59E-01 | 9.03E-01 | 6.05E-01 | 2.25E-01 |
| 681.33111 | 64.15  | 13.24 | 11.64 | 12.77 | 12.24 | 6.78E-06 | 3.53E-06 | 4.32E-01 | 1.03E-02 | 2.55E-03 | 2.69E-01 | 3.58E-01 |
| 681.36097 | 281.22 | 16.58 | 15.43 | 15.77 | 16.33 | 6.76E-02 | 6.76E-02 | 2.96E-01 | 9.56E-01 | 8.93E-01 | 2.59E-01 | 6.53E-01 |
| 681.46375 | 53.47  | 13.20 | 15.16 | 14.22 | 13.11 | 2.41E-04 | 7.90E-04 | 1.77E-01 | 9.98E-01 | 2.69E-01 | 9.62E-04 | 1.60E-01 |
| 681.47859 | 34.89  | 18.79 | 18.75 | 18.65 | 18.60 | 7.43E-01 | 9.95E-01 | 8.63E-01 | 7.50E-01 | 9.56E-01 | 8.83E-01 | 9.95E-01 |
| 681.48933 | 274.92 | 17.05 | 15.28 | 15.50 | 15.94 | 7.69E-06 | 1.30E-05 | 1.50E-04 | 1.80E-02 | 9.35E-01 | 3.12E-01 | 6.48E-01 |
| 681.53053 | 50.54  | 11.82 | 13.44 | 12.70 | 12.97 | 1.13E-02 | 6.15E-03 | 2.71E-01 | 1.07E-01 | 4.56E-01 | 7.99E-01 | 9.55E-01 |
| 681.53905 | 52.79  | 11.93 | 16.02 | 14.79 | 15.12 | 2.81E-12 | 4.44E-12 | 1.11E-06 | 1.50E-07 | 1.17E-01 | 3.83E-01 | 9.40E-01 |
| 681.61154 | 254.04 | 15.33 | 13.07 | 14.26 | 14.02 | 7.95E-12 | 7.62E-13 | 1.10E-03 | 7.67E-05 | 3.87E-04 | 9.74E-03 | 8.63E-01 |
| 681.71875 | 45.54  | 10.72 | 10.72 | 10.63 | 12.71 | 1.21E-04 | 1.00E+00 | 9.98E-01 | 6.31E-04 | 9.98E-01 | 1.01E-03 | 4.56E-04 |
| 681.76834 | 282.6  | 16.06 | 15.05 | 14.63 | 15.42 | 1.14E-01 | 3.39E-01 | 8.15E-02 | 7.28E-01 | 9.05E-01 | 9.39E-01 | 5.99E-01 |
| 681.81057 | 282.81 | 16.20 | 15.24 | 14.40 | 15.91 | 1.52E-02 | 3.59E-01 | 1.20E-02 | 9.62E-01 | 5.07E-01 | 7.05E-01 | 7.27E-02 |
| 681.83038 | 56.94  | 13.52 | 13.41 | 14.47 | 13.12 | 3.12E-04 | 9.83E-01 | 1.19E-02 | 5.93E-01 | 5.24E-03 | 8.20E-01 | 2.81E-04 |
| 681.85884 | 283.46 | 16.33 | 16.01 | 15.83 | 16.44 | 5.56E-01 | 8.98E-01 | 6.83E-01 | 9.96E-01 | 9.79E-01 | 8.18E-01 | 5.86E-01 |
| 681.90455 | 284.7  | 17.02 | 15.47 | 15.23 | 16.32 | 2.34E-03 | 1.51E-02 | 3.12E-03 | 5.50E-01 | 9.71E-01 | 4.00E-01 | 1.87E-01 |
| 681.93185 | 39.74  | 12.15 | 12.47 | 11.06 | 10.20 | 7.87E-07 | 8.70E-01 | 4.18E-02 | 4.54E-05 | 5.83E-03 | 3.21E-06 | 2.02E-01 |
| 681.95035 | 283.95 | 17.23 | 15.48 | 15.76 | 16.25 | 1.38E-03 | 1.30E-03 | 9.44E-03 | 1.77E-01 | 9.34E-01 | 4.03E-01 | 7.53E-01 |
| 681.96828 | 53.21  | 13.66 | 15.10 | 13.91 | 14.09 | 1.78E-04 | 1.16E-04 | 8.82E-01 | 5.98E-01 | 2.67E-03 | 2.06E-02 | 9.53E-01 |
| 681.99521 | 283.69 | 17.30 | 15.25 | 15.25 | 16.12 | 6.78E-05 | 2.82E-04 | 2.41E-04 | 9.67E-02 | 1.00E+00 | 3.45E-01 | 3.37E-01 |
| 682.03507 | 52.68  | 12.12 | 17.37 | 16.50 | 16.74 | 1.37E-18 | 7.32E-14 | 2.53E-12 | 1.10E-12 | 4.46E-01 | 7.24E-01 | 9.78E-01 |
| 682.0397  | 282.67 | 17.08 | 15.89 | 15.75 | 16.86 | 3.14E-03 | 2.81E-02 | 1.02E-02 | 9.59E-01 | 9.90E-01 | 1.37E-01 | 6.63E-02 |
| 682.08601 | 283.4  | 16.95 | 15.18 | 15.09 | 15.70 | 2.55E-03 | 7.75E-03 | 3.98E-03 | 1.22E-01 | 9.98E-01 | 8.04E-01 | 7.08E-01 |
| 682.35612 | 279.83 | 16.64 | 14.99 | 15.04 | 15.69 | 1.74E-06 | 9.84E-06 | 1.51E-05 | 3.11E-02 | 9.99E-01 | 2.03E-01 | 2.51E-01 |
| 682.43315 | 35.41  | 10.62 | 14.28 | 10.95 | 14.41 | 9.93E-12 | 8.42E-08 | 9.50E-01 | 6.40E-08 | 2.31E-06 | 9.97E-01 | 1.64E-06 |
| 682.46852 | 53.32  | 13.95 | 14.76 | 13.92 | 13.86 | 3.97E-02 | 8.48E-02 | 1.00E+00 | 9.96E-01 | 8.06E-02 | 6.77E-02 | 9.99E-01 |
| 682.48995 | 43.42  | 16.83 | 15.93 | 15.26 | 16.05 | 3.80E-05 | 2.59E-02 | 7.82E-06 | 7.95E-02 | 1.75E-01 | 9.86E-01 | 9.14E-02 |

|           |        |       |       |       |       |          |          |          |          |          |          |          |
|-----------|--------|-------|-------|-------|-------|----------|----------|----------|----------|----------|----------|----------|
| 682.49384 | 274.96 | 14.80 | 15.07 | 15.20 | 15.67 | 5.03E-01 | 9.62E-01 | 8.83E-01 | 4.20E-01 | 9.95E-01 | 7.35E-01 | 8.52E-01 |
| 682.53894 | 36.45  | 17.75 | 12.69 | 13.74 | 14.79 | 7.30E-21 | 7.09E-14 | 1.11E-13 | 5.56E-08 | 1.52E-01 | 3.35E-04 | 1.65E-01 |
| 682.57488 | 46.31  | 17.33 | 18.90 | 18.66 | 18.66 | 2.24E-08 | 1.30E-07 | 8.03E-06 | 1.67E-05 | 8.22E-01 | 8.42E-01 | 1.00E+00 |
| 682.63262 | 275.53 | 16.64 | 14.70 | 14.95 | 15.13 | 3.26E-05 | 6.70E-05 | 5.89E-04 | 4.26E-03 | 9.44E-01 | 7.86E-01 | 9.78E-01 |
| 682.71015 | 49.62  | 9.50  | 11.78 | 11.98 | 12.93 | 7.69E-22 | 1.80E-11 | 2.92E-13 | 6.49E-14 | 9.24E-01 | 3.12E-03 | 2.00E-02 |
| 682.83936 | 43.32  | 8.76  | 9.62  | 9.82  | 11.86 | 8.85E-10 | 1.95E-01 | 6.37E-02 | 1.55E-10 | 9.66E-01 | 9.46E-06 | 6.02E-05 |
| 682.92464 | 37.67  | 11.17 | 14.60 | 12.67 | 14.85 | 8.43E-24 | 7.38E-14 | 1.17E-04 | 7.09E-14 | 7.90E-07 | 9.04E-01 | 4.62E-08 |
| 683.03588 | 53.53  | 11.13 | 11.02 | 10.23 | 12.07 | 1.35E-03 | 9.94E-01 | 1.51E-01 | 1.49E-01 | 2.79E-01 | 1.01E-01 | 3.77E-04 |
| 683.13452 | 64.13  | 17.57 | 18.58 | 19.22 | 17.76 | 7.82E-08 | 3.85E-03 | 2.25E-07 | 9.20E-01 | 1.39E-01 | 4.48E-02 | 2.11E-05 |
| 683.35791 | 277.17 | 16.26 | 15.54 | 15.52 | 15.98 | 1.52E-01 | 2.29E-01 | 1.98E-01 | 8.90E-01 | 1.00E+00 | 6.88E-01 | 6.47E-01 |
| 683.43133 | 27.26  | 12.04 | 14.23 | 11.67 | 14.20 | 1.90E-17 | 9.78E-10 | 6.59E-01 | 3.95E-09 | 3.52E-12 | 1.00E+00 | 1.71E-11 |
| 683.44631 | 45.65  | 13.00 | 12.71 | 12.71 | 11.64 | 3.13E-01 | 9.78E-01 | 9.78E-01 | 2.65E-01 | 1.00E+00 | 5.08E-01 | 5.00E-01 |
| 683.50109 | 43.75  | 15.99 | 13.58 | 14.02 | 13.17 | 6.50E-07 | 3.74E-05 | 9.53E-04 | 1.76E-06 | 8.49E-01 | 8.73E-01 | 4.06E-01 |
| 683.52108 | 267.08 | 11.37 | 14.67 | 14.68 | 14.27 | 3.88E-07 | 7.41E-06 | 5.55E-06 | 1.67E-04 | 1.00E+00 | 9.42E-01 | 9.36E-01 |
| 683.54377 | 22.32  | 16.23 | 8.07  | 9.75  | 11.29 | 9.59E-39 | 3.65E-14 | 3.67E-14 | 7.47E-14 | 8.67E-03 | 7.50E-08 | 2.46E-02 |
| 683.61123 | 267.64 | 14.78 | 13.56 | 14.79 | 14.23 | 1.53E-03 | 2.96E-03 | 1.00E+00 | 4.07E-01 | 3.57E-03 | 2.69E-01 | 4.11E-01 |
| 683.70911 | 267.49 | 15.73 | 14.43 | 15.11 | 15.29 | 2.89E-04 | 7.97E-05 | 1.35E-01 | 4.50E-01 | 1.14E-01 | 3.10E-02 | 9.33E-01 |
| 683.79359 | 38.23  | 7.94  | 8.53  | 9.37  | 9.78  | 1.20E-02 | 7.46E-01 | 6.91E-02 | 1.33E-02 | 5.02E-01 | 1.86E-01 | 9.09E-01 |
| 683.79381 | 267.62 | 15.93 | 14.69 | 15.37 | 15.35 | 1.08E-03 | 2.84E-04 | 2.30E-01 | 2.31E-01 | 1.25E-01 | 1.66E-01 | 1.00E+00 |
| 683.88927 | 267.64 | 15.63 | 14.88 | 15.30 | 15.26 | 2.34E-01 | 1.56E-01 | 7.82E-01 | 7.49E-01 | 6.66E-01 | 7.42E-01 | 1.00E+00 |
| 683.91594 | 54.44  | 17.86 | 17.26 | 16.59 | 15.77 | 1.17E-04 | 5.54E-01 | 2.59E-02 | 6.42E-05 | 4.68E-01 | 1.09E-02 | 3.11E-01 |
| 683.98022 | 268.32 | 13.41 | 14.38 | 15.21 | 14.63 | 6.66E-03 | 2.44E-01 | 3.07E-03 | 1.02E-01 | 4.01E-01 | 9.67E-01 | 7.13E-01 |
| 684.01332 | 53.65  | 15.48 | 10.01 | 10.06 | 12.11 | 1.11E-17 | 8.16E-14 | 8.18E-14 | 2.63E-06 | 1.00E+00 | 1.04E-02 | 1.22E-02 |
| 684.13672 | 64.36  | 13.46 | 12.37 | 13.41 | 12.28 | 5.71E-03 | 5.02E-02 | 9.99E-01 | 3.52E-02 | 7.68E-02 | 9.97E-01 | 5.48E-02 |
| 684.19514 | 75.52  | 12.22 | 16.63 | 12.70 | 15.28 | 7.51E-12 | 2.46E-10 | 8.67E-01 | 2.66E-05 | 3.92E-08 | 1.90E-01 | 8.20E-04 |
| 684.36014 | 278.83 | 16.13 | 14.74 | 15.35 | 15.66 | 3.35E-04 | 1.14E-04 | 6.39E-02 | 4.62E-01 | 2.52E-01 | 3.68E-02 | 7.93E-01 |
| 684.44508 | 33.91  | 13.93 | 17.87 | 15.21 | 17.57 | 4.22E-17 | 9.59E-14 | 3.06E-02 | 4.19E-12 | 3.68E-07 | 9.26E-01 | 1.41E-05 |
| 684.46795 | 53.44  | 11.77 | 12.56 | 10.04 | 11.46 | 1.10E-04 | 4.46E-01 | 6.64E-03 | 9.41E-01 | 3.80E-05 | 2.08E-01 | 5.72E-02 |
| 684.48585 | 50.7   | 15.21 | 16.65 | 13.62 | 14.94 | 1.01E-04 | 9.87E-02 | 5.14E-02 | 9.77E-01 | 2.17E-05 | 5.11E-02 | 1.80E-01 |
| 684.49968 | 278.38 | 14.12 | 13.59 | 15.28 | 13.70 | 1.68E-02 | 7.82E-01 | 1.64E-01 | 8.85E-01 | 1.95E-02 | 9.98E-01 | 3.99E-02 |
| 684.56949 | 43.49  | 18.71 | 18.61 | 18.46 | 18.63 | 6.02E-01 | 9.44E-01 | 5.24E-01 | 9.72E-01 | 8.66E-01 | 1.00E+00 | 8.26E-01 |
| 684.65145 | 279.52 | 11.83 | 14.77 | 14.97 | 13.78 | 5.07E-08 | 1.79E-06 | 2.38E-07 | 4.25E-03 | 9.86E-01 | 3.34E-01 | 1.78E-01 |
| 684.66165 | 47.18  | 12.44 | 16.54 | 16.02 | 16.66 | 6.61E-19 | 7.94E-14 | 3.22E-12 | 7.80E-14 | 7.06E-01 | 9.95E-01 | 5.72E-01 |
| 684.70385 | 49.75  | 10.68 | 12.12 | 12.07 | 11.69 | 4.46E-03 | 7.98E-03 | 1.03E-02 | 1.25E-01 | 1.00E+00 | 8.04E-01 | 8.52E-01 |
| 684.80564 | 283.86 | 14.84 | 15.21 | 14.95 | 14.63 | 6.31E-01 | 8.15E-01 | 9.94E-01 | 9.64E-01 | 9.29E-01 | 5.67E-01 | 8.92E-01 |
| 684.91063 | 51.8   | 17.26 | 18.84 | 19.03 | 17.97 | 1.68E-11 | 2.15E-08 | 2.34E-10 | 4.01E-02 | 8.88E-01 | 8.05E-03 | 6.04E-04 |
| 684.94435 | 27.45  | 9.17  | 15.46 | 11.10 | 14.67 | 1.21E-27 | 4.23E-14 | 1.99E-03 | 7.27E-14 | 8.43E-13 | 5.04E-01 | 9.35E-09 |
| 685.13197 | 64.88  | 11.93 | 12.06 | 13.02 | 12.09 | 1.71E-01 | 9.95E-01 | 1.70E-01 | 9.92E-01 | 2.96E-01 | 1.00E+00 | 3.43E-01 |
| 685.35264 | 39.16  | 11.44 | 10.98 | 9.16  | 10.97 | 3.13E-02 | 9.41E-01 | 2.42E-02 | 9.42E-01 | 1.25E-01 | 1.00E+00 | 1.44E-01 |
| 685.35523 | 272.84 | 14.70 | 15.07 | 15.33 | 15.37 | 4.07E-01 | 8.38E-01 | 4.71E-01 | 4.41E-01 | 9.36E-01 | 9.11E-01 | 1.00E+00 |
| 685.44743 | 28.27  | 10.71 | 14.20 | 12.39 | 14.14 | 8.13E-10 | 1.80E-08 | 1.54E-02 | 6.89E-08 | 1.07E-02 | 1.00E+00 | 1.78E-02 |
| 685.77654 | 50.4   | 14.96 | 14.67 | 14.40 | 13.15 | 2.56E-03 | 9.30E-01 | 6.38E-01 | 1.57E-03 | 9.46E-01 | 1.54E-02 | 6.33E-02 |
| 685.91278 | 53.03  | 15.13 | 16.54 | 16.32 | 15.31 | 2.29E-04 | 1.24E-03 | 7.93E-03 | 9.64E-01 | 9.45E-01 | 1.22E-02 | 5.23E-02 |
| 686.01784 | 52.97  | 18.78 | 19.99 | 20.33 | 19.45 | 3.34E-08 | 2.72E-05 | 3.21E-08 | 5.66E-02 | 5.71E-01 | 2.01E-01 | 7.29E-03 |
| 686.35464 | 39.65  | 10.50 | 9.49  | 8.38  | 10.03 | 4.21E-02 | 5.51E-01 | 2.75E-02 | 9.34E-01 | 4.82E-01 | 9.08E-01 | 1.66E-01 |
| 686.35795 | 277.57 | 15.08 | 15.15 | 15.42 | 15.52 | 6.31E-01 | 9.97E-01 | 7.99E-01 | 6.68E-01 | 9.02E-01 | 7.98E-01 | 9.94E-01 |
| 686.43931 | 46.23  | 15.41 | 14.97 | 14.76 | 14.37 | 3.14E-01 | 8.49E-01 | 6.20E-01 | 2.46E-01 | 9.81E-01 | 7.26E-01 | 9.05E-01 |
| 686.45436 | 52.03  | 14.00 | 16.38 | 16.54 | 14.25 | 7.18E-08 | 3.75E-05 | 7.65E-06 | 9.65E-01 | 9.91E-01 | 7.04E-04 | 1.95E-04 |
| 686.52684 | 48.65  | 13.32 | 13.46 | 13.26 | 14.26 | 8.50E-02 | 9.86E-01 | 9.99E-01 | 1.15E-01 | 9.64E-01 | 2.54E-01 | 9.43E-02 |
| 686.57054 | 44.17  | 18.03 | 17.25 | 16.90 | 17.18 | 5.49E-06 | 2.89E-03 | 3.37E-06 | 1.24E-03 | 4.13E-01 | 9.89E-01 | 6.35E-01 |
| 686.65901 | 47.18  | 14.24 | 17.38 | 17.24 | 17.63 | 1.24E-35 | 3.67E-14 | 3.76E-14 | 3.65E-14 | 9.48E-01 | 7.71E-01 | 4.38E-01 |
| 686.90483 | 51.95  | 16.58 | 18.73 | 18.84 | 17.72 | 6.90E-15 | 8.07E-12 | 5.14E-13 | 7.18E-04 | 9.81E-01 | 5.77E-03 | 1.42E-03 |
| 687.01883 | 53.66  | 15.48 | 16.79 | 17.22 | 16.82 | 9.59E-06 | 1.54E-03 | 8.26E-06 | 1.74E-03 | 6.36E-01 | 1.00E+00 | 6.92E-01 |
| 687.45068 | 52.63  | 14.07 | 12.86 | 13.09 | 11.75 | 1.40E-04 | 6.53E-02 | 1.80E-01 | 3.23E-05 | 9.68E-01 | 1.35E-01 | 4.40E-02 |
| 687.57476 | 23.42  | 15.96 | 9.05  | 10.68 | 11.03 | 1.94E-24 | 4.54E-14 | 7.59E-14 | 4.33E-13 | 4.06E-02 | 1.08E-02 | 9.47E-01 |
| 687.77006 | 50.54  | 14.26 | 13.13 | 13.01 | 11.86 | 1.46E-07 | 1.69E-02 | 5.50E-03 | 1.83E-08 | 9.89E-01 | 9.12E-03 | 2.16E-02 |
| 688.01458 | 53.18  | 15.93 | 17.73 | 18.12 | 17.34 | 1.70E-08 | 6.62E-06 | 2.02E-08 | 1.03E-03 | 7.09E-01 | 7.26E-01 | 1.60E-01 |
| 688.1053  | 248.73 | 11.16 | 12.27 | 10.61 | 11.87 | 9.97E-02 | 3.73E-01 | 8.57E-01 | 7.47E-01 | 9.15E-02 | 9.47E-01 | 3.10E-01 |
| 688.357   | 276.97 | 16.29 | 14.93 | 15.39 | 15.81 | 2.78E-04 | 1.41E-04 | 2.15E-02 | 4.43E-01 | 4.93E-01 | 4.51E-02 | 5.82E-01 |
| 688.4289  | 47.14  | 14.45 | 11.68 | 11.18 | 11.72 | 3.36E-14 | 1.29E-09 | 7.10E-13 | 5.79E-09 | 6.46E-01 | 1.00E+00 | 6.04E-01 |
| 688.49925 | 276.54 | 12.29 | 14.08 | 13.70 | 14.27 | 2.56E-02 | 5.70E-02 | 1.83E-01 | 3.43E-02 | 9.53E-01 | 9.95E-01 | 8.71E-01 |
| 688.52446 | 47.02  | 15.68 | 16.90 | 16.66 | 16.37 | 5.98E-06 | 5.15E-06 | 3.26E-04 | 3.09E-02 | 7.66E-01 | 1.57E-01 | 6.46E-01 |
| 688.58365 | 40.9   | 15.72 | 8.66  | 7.16  | 9.75  | 3.93E-29 | 7.12E-14 | 3.67E-14 | 8.00E-14 | 1.33E-01 | 4.29E-01 | 1.84E-03 |
| 688.66043 | 47.92  | 11.99 | 16.10 | 15.93 | 16.42 | 7.89E-28 | 6.61E-14 | 7.12E-14 | 5.30E-14 | 9.74E-01 | 8.58E-01 | 6.19E-01 |
| 688.75    | 50.25  | 8.41  | 11.91 | 10.92 | 13.23 | 7.96E-16 | 1.08E-09 | 1.40E-05 | 7.49E-14 | 2.56E-01 | 8.07E-02 | 2.11E-04 |
| 688.82085 | 278.18 | 15.30 | 15.33 | 15.68 | 15.33 | 5.61E-01 | 9.99E-01 | 5.73E-01 | 1.00E+00 | 6.72E-01 | 1.00E+00 | 6.86E-01 |
| 688.89725 | 277.07 | 15.01 | 15.67 | 15.84 | 15.70 | 2.29E-02 | 1.14E-01 | 2.28E-02 | 1.00E-01 | 9.36E-01 | 1.00E+00 | 9.67E-01 |
| 688.90594 | 47.05  | 11.99 | 11.93 | 12.35 | 12.54 | 2.72E-01 | 9.98E-01 | 7.10E-01 | 4.01E-01 | 6.24E-01 | 3.34E-01 | 9.53E-01 |

|           |        |       |       |       |       |          |          |          |          |          |          |          |
|-----------|--------|-------|-------|-------|-------|----------|----------|----------|----------|----------|----------|----------|
| 688.96976 | 278.19 | 15.88 | 15.46 | 15.47 | 15.33 | 3.19E-01 | 5.19E-01 | 5.32E-01 | 3.07E-01 | 1.00E+00 | 9.80E-01 | 9.74E-01 |
| 689.02125 | 53.26  | 14.56 | 18.31 | 18.15 | 17.24 | 1.91E-17 | 7.92E-14 | 1.05E-13 | 3.48E-08 | 9.84E-01 | 9.08E-02 | 1.86E-01 |
| 689.04988 | 273.02 | 14.95 | 16.41 | 16.26 | 15.73 | 1.42E-02 | 1.69E-02 | 3.65E-02 | 4.13E-01 | 9.91E-01 | 5.54E-01 | 7.24E-01 |
| 689.12161 | 277.79 | 15.38 | 15.62 | 15.40 | 15.30 | 8.05E-01 | 8.78E-01 | 1.00E+00 | 9.95E-01 | 9.03E-01 | 7.85E-01 | 9.92E-01 |
| 689.19795 | 278.83 | 15.00 | 14.82 | 14.67 | 14.43 | 2.04E-01 | 8.99E-01 | 5.77E-01 | 1.54E-01 | 9.44E-01 | 5.08E-01 | 8.28E-01 |
| 689.2095  | 268.12 | 14.89 | 16.65 | 16.00 | 15.48 | 1.53E-03 | 7.64E-04 | 6.45E-02 | 5.75E-01 | 5.07E-01 | 7.46E-02 | 6.94E-01 |
| 689.28055 | 276.2  | 15.46 | 15.23 | 15.78 | 15.54 | 3.22E-01 | 8.58E-01 | 6.66E-01 | 9.93E-01 | 2.42E-01 | 7.40E-01 | 8.53E-01 |
| 689.34853 | 120.56 | 6.60  | 12.25 | 12.01 | 11.56 | 7.60E-61 | 3.65E-14 | 3.65E-14 | 3.65E-14 | 8.19E-01 | 7.98E-02 | 3.98E-01 |
| 689.35809 | 113.75 | 7.32  | 12.68 | 12.27 | 12.36 | 2.00E-42 | 3.65E-14 | 3.65E-14 | 3.65E-14 | 6.72E-01 | 8.24E-01 | 9.96E-01 |
| 689.36099 | 278.5  | 15.84 | 16.47 | 16.08 | 16.28 | 3.97E-01 | 3.48E-01 | 9.24E-01 | 6.63E-01 | 7.40E-01 | 9.68E-01 | 9.52E-01 |
| 689.45864 | 52.77  | 14.81 | 17.39 | 17.33 | 15.56 | 1.62E-10 | 2.91E-08 | 4.30E-08 | 3.21E-01 | 9.99E-01 | 3.40E-04 | 4.83E-04 |
| 689.52101 | 52.01  | 12.86 | 12.92 | 12.78 | 12.97 | 9.84E-01 | 9.99E-01 | 9.98E-01 | 9.96E-01 | 9.91E-01 | 1.00E+00 | 9.82E-01 |
| 689.59946 | 118.62 | 8.11  | 12.21 | 12.08 | 11.46 | 7.36E-28 | 4.72E-14 | 5.34E-14 | 7.43E-14 | 9.84E-01 | 1.99E-01 | 3.57E-01 |
| 689.76894 | 50.31  | 13.30 | 11.51 | 11.79 | 10.55 | 9.92E-07 | 1.21E-03 | 8.46E-03 | 2.91E-07 | 9.38E-01 | 2.22E-01 | 6.20E-02 |
| 689.8588  | 62.5   | 14.22 | 11.97 | 12.52 | 12.12 | 4.64E-10 | 5.45E-09 | 1.20E-05 | 1.21E-07 | 4.22E-01 | 9.78E-01 | 6.98E-01 |
| 689.95857 | 52.82  | 12.89 | 14.12 | 13.46 | 12.72 | 5.59E-03 | 1.55E-02 | 5.05E-01 | 9.79E-01 | 3.88E-01 | 8.01E-03 | 3.28E-01 |
| 690.02057 | 53.43  | 13.43 | 17.23 | 17.04 | 16.16 | 9.30E-20 | 7.49E-14 | 7.38E-14 | 1.96E-09 | 9.71E-01 | 6.23E-02 | 1.59E-01 |
| 690.21159 | 70.92  | 10.87 | 12.16 | 12.38 | 11.02 | 4.23E-03 | 5.25E-02 | 1.33E-02 | 9.92E-01 | 9.70E-01 | 1.41E-01 | 4.82E-02 |
| 690.45498 | 52.82  | 13.94 | 13.98 | 13.80 | 13.24 | 1.81E-01 | 1.00E+00 | 9.76E-01 | 2.12E-01 | 9.58E-01 | 1.96E-01 | 4.32E-01 |
| 690.52151 | 46.46  | 16.75 | 17.66 | 17.43 | 17.10 | 5.65E-05 | 4.35E-05 | 3.57E-03 | 3.20E-01 | 6.69E-01 | 3.97E-02 | 3.85E-01 |
| 690.60434 | 46.07  | 15.73 | 17.85 | 17.44 | 17.82 | 2.50E-27 | 4.94E-14 | 7.38E-14 | 6.16E-14 | 1.40E-01 | 9.98E-01 | 2.19E-01 |
| 690.61797 | 48.83  | 12.55 | 11.79 | 11.95 | 12.75 | 7.66E-02 | 2.50E-01 | 4.52E-01 | 9.62E-01 | 9.81E-01 | 1.20E-01 | 2.43E-01 |
| 690.74702 | 50.49  | 10.51 | 11.43 | 10.82 | 12.80 | 1.01E-04 | 2.52E-01 | 9.27E-01 | 7.30E-05 | 6.18E-01 | 5.06E-02 | 1.10E-03 |
| 691.07981 | 66.27  | 9.55  | 12.64 | 12.97 | 13.32 | 1.36E-14 | 3.42E-09 | 4.21E-11 | 2.54E-12 | 9.05E-01 | 5.30E-01 | 8.96E-01 |
| 691.74229 | 49.71  | 11.05 | 11.64 | 12.08 | 12.47 | 2.46E-03 | 4.03E-01 | 3.13E-02 | 1.74E-03 | 6.60E-01 | 1.63E-01 | 7.63E-01 |
| 692.02642 | 53.31  | 18.62 | 21.44 | 21.12 | 19.98 | 1.95E-19 | 7.41E-14 | 8.54E-14 | 5.76E-05 | 7.18E-01 | 3.34E-05 | 1.76E-03 |
| 692.21658 | 278.67 | 15.74 | 14.92 | 15.23 | 15.30 | 1.57E-01 | 1.05E-01 | 4.71E-01 | 6.24E-01 | 8.40E-01 | 7.56E-01 | 9.98E-01 |
| 692.36874 | 278.15 | 15.47 | 16.73 | 16.52 | 16.51 | 3.11E-03 | 4.23E-03 | 2.20E-02 | 3.12E-02 | 9.49E-01 | 9.48E-01 | 1.00E+00 |
| 692.46066 | 53.58  | 13.68 | 15.12 | 14.01 | 13.72 | 4.52E-03 | 5.59E-03 | 8.68E-01 | 1.00E+00 | 6.16E-02 | 1.34E-02 | 9.21E-01 |
| 692.51162 | 278.8  | 15.22 | 15.10 | 14.96 | 15.33 | 7.25E-01 | 9.83E-01 | 8.48E-01 | 9.87E-01 | 9.73E-01 | 9.10E-01 | 6.94E-01 |
| 692.52187 | 48.31  | 16.05 | 17.78 | 16.81 | 16.83 | 4.64E-05 | 8.52E-06 | 1.27E-01 | 1.34E-01 | 3.61E-02 | 5.21E-02 | 1.00E+00 |
| 692.60228 | 46.33  | 16.46 | 18.66 | 18.46 | 18.37 | 8.31E-35 | 3.65E-14 | 3.72E-14 | 4.74E-14 | 6.19E-01 | 3.40E-01 | 9.58E-01 |
| 692.65145 | 279    | 15.45 | 14.15 | 14.70 | 14.66 | 1.79E-04 | 5.16E-05 | 4.24E-02 | 3.57E-02 | 2.40E-01 | 3.44E-01 | 9.99E-01 |
| 692.78143 | 279.13 | 15.78 | 14.81 | 14.86 | 14.95 | 3.48E-03 | 7.65E-03 | 1.15E-02 | 3.75E-02 | 9.99E-01 | 9.72E-01 | 9.91E-01 |
| 692.89126 | 52.32  | 11.85 | 12.04 | 12.30 | 10.95 | 6.70E-02 | 9.79E-01 | 7.86E-01 | 2.97E-01 | 9.55E-01 | 1.64E-01 | 4.85E-02 |
| 692.9313  | 278.72 | 16.02 | 14.91 | 14.93 | 15.15 | 6.13E-04 | 1.78E-03 | 1.96E-03 | 2.87E-02 | 1.00E+00 | 8.77E-01 | 8.98E-01 |
| 692.96226 | 53.35  | 12.61 | 12.38 | 11.16 | 11.99 | 1.12E-03 | 9.25E-01 | 7.60E-04 | 3.73E-01 | 9.80E-03 | 7.63E-01 | 1.58E-01 |
| 693.02645 | 53.23  | 15.88 | 18.87 | 18.28 | 17.57 | 5.55E-22 | 6.41E-14 | 7.78E-14 | 6.77E-08 | 1.64E-01 | 8.74E-05 | 7.28E-02 |
| 693.07439 | 279.28 | 15.26 | 14.76 | 14.78 | 15.23 | 5.32E-01 | 6.64E-01 | 6.95E-01 | 1.00E+00 | 1.00E+00 | 7.37E-01 | 7.66E-01 |
| 693.21092 | 278.7  | 15.42 | 14.62 | 15.04 | 15.25 | 5.72E-02 | 3.87E-02 | 5.75E-01 | 9.44E-01 | 5.12E-01 | 1.93E-01 | 9.10E-01 |
| 693.35654 | 279.25 | 16.31 | 14.55 | 14.78 | 15.41 | 3.85E-08 | 1.03E-07 | 3.85E-06 | 1.94E-02 | 8.73E-01 | 3.84E-02 | 2.02E-01 |
| 693.45697 | 53.21  | 14.82 | 13.04 | 11.98 | 12.67 | 8.68E-15 | 1.15E-06 | 8.16E-14 | 8.38E-09 | 1.06E-02 | 7.19E-01 | 1.93E-01 |
| 693.50117 | 277.56 | 15.79 | 15.57 | 15.32 | 15.68 | 5.14E-01 | 9.00E-01 | 4.51E-01 | 9.87E-01 | 8.74E-01 | 9.88E-01 | 7.10E-01 |
| 693.89346 | 52.49  | 14.45 | 16.21 | 16.07 | 14.47 | 6.38E-09 | 3.23E-06 | 1.94E-05 | 1.00E+00 | 9.74E-01 | 1.71E-05 | 8.70E-05 |
| 694.01716 | 53.33  | 17.46 | 18.84 | 18.46 | 18.28 | 3.89E-07 | 1.70E-07 | 2.24E-04 | 5.24E-03 | 4.05E-01 | 1.29E-01 | 9.01E-01 |
| 694.35707 | 279.27 | 15.60 | 15.19 | 15.26 | 15.65 | 4.08E-01 | 5.88E-01 | 7.05E-01 | 9.98E-01 | 9.97E-01 | 5.33E-01 | 6.45E-01 |
| 694.47141 | 45.54  | 14.62 | 13.19 | 12.41 | 12.79 | 1.04E-05 | 9.45E-03 | 9.19E-06 | 6.07E-04 | 3.34E-01 | 8.37E-01 | 8.55E-01 |
| 694.49637 | 279.02 | 16.52 | 15.11 | 15.19 | 14.81 | 1.68E-05 | 7.01E-04 | 1.38E-03 | 3.73E-05 | 9.97E-01 | 8.59E-01 | 7.47E-01 |
| 694.51119 | 48.68  | 14.22 | 12.55 | 12.51 | 13.68 | 5.77E-06 | 1.11E-04 | 6.07E-05 | 5.19E-01 | 1.00E+00 | 2.82E-02 | 2.01E-02 |
| 694.58993 | 44.69  | 14.08 | 15.79 | 15.07 | 15.85 | 2.48E-14 | 6.62E-12 | 1.03E-04 | 4.24E-12 | 1.06E-02 | 9.94E-01 | 5.82E-03 |
| 694.60481 | 47.27  | 15.01 | 17.62 | 17.58 | 17.31 | 1.17E-24 | 7.22E-14 | 7.05E-14 | 7.58E-14 | 9.99E-01 | 6.63E-01 | 7.40E-01 |
| 694.64457 | 279.18 | 15.84 | 14.49 | 14.77 | 14.63 | 8.38E-06 | 2.19E-05 | 1.18E-03 | 3.03E-04 | 7.57E-01 | 9.63E-01 | 9.64E-01 |
| 694.69223 | 47.34  | 11.51 | 14.84 | 14.82 | 15.75 | 4.91E-17 | 6.76E-11 | 5.92E-11 | 7.56E-14 | 1.00E+00 | 2.50E-01 | 2.25E-01 |
| 694.79079 | 279.58 | 16.19 | 18.57 | 18.70 | 17.70 | 5.15E-18 | 9.63E-14 | 7.38E-14 | 2.34E-06 | 9.68E-01 | 1.93E-02 | 4.38E-03 |
| 694.8268  | 278.53 | 15.36 | 14.83 | 15.03 | 15.30 | 3.35E-01 | 3.37E-01 | 7.09E-01 | 9.97E-01 | 9.30E-01 | 5.09E-01 | 8.51E-01 |
| 694.88796 | 51.87  | 9.57  | 10.41 | 11.19 | 9.91  | 1.39E-02 | 3.53E-01 | 9.01E-03 | 9.16E-01 | 4.59E-01 | 7.89E-01 | 8.60E-02 |
| 694.92244 | 276.98 | 13.18 | 14.80 | 15.20 | 15.30 | 1.38E-07 | 2.79E-04 | 2.57E-06 | 1.89E-06 | 7.55E-01 | 6.30E-01 | 9.95E-01 |
| 694.93679 | 279.16 | 13.99 | 18.19 | 18.23 | 17.64 | 5.40E-17 | 2.06E-13 | 1.27E-13 | 2.67E-10 | 1.00E+00 | 7.44E-01 | 6.99E-01 |
| 694.9371  | 54.26  | 17.27 | 17.86 | 17.20 | 15.52 | 1.46E-04 | 6.32E-01 | 9.99E-01 | 3.75E-03 | 5.61E-01 | 7.41E-05 | 7.67E-03 |
| 694.95179 | 279.23 | 15.20 | 14.36 | 14.66 | 15.00 | 1.75E-02 | 1.42E-02 | 2.09E-01 | 9.08E-01 | 7.06E-01 | 1.22E-01 | 6.35E-01 |
| 695.06742 | 277.03 | 14.32 | 14.94 | 15.07 | 15.28 | 8.95E-02 | 3.77E-01 | 2.12E-01 | 7.86E-02 | 9.89E-01 | 8.47E-01 | 9.55E-01 |
| 695.08317 | 279.53 | 15.62 | 18.97 | 19.05 | 18.42 | 2.21E-30 | 4.05E-14 | 3.76E-14 | 7.52E-14 | 9.95E-01 | 2.50E-01 | 1.53E-01 |
| 695.09925 | 132.72 | 7.49  | 13.37 | 13.09 | 13.16 | 5.00E-68 | 3.65E-14 | 3.65E-14 | 3.65E-14 | 7.23E-01 | 8.83E-01 | 9.92E-01 |
| 695.11352 | 278.63 | 15.76 | 14.71 | 14.87 | 15.04 | 1.19E-03 | 1.24E-03 | 8.50E-03 | 6.33E-02 | 9.39E-01 | 6.70E-01 | 9.38E-01 |
| 695.13403 | 147.29 | 9.30  | 18.86 | 16.17 | 14.45 | 1.83E-28 | 3.65E-14 | 7.65E-14 | 3.64E-10 | 2.19E-03 | 2.07E-07 | 1.13E-01 |
| 695.2223  | 279.34 | 15.52 | 15.53 | 15.85 | 15.68 | 5.54E-01 | 1.00E+00 | 5.76E-01 | 9.26E-01 | 6.13E-01 | 9.37E-01 | 9.31E-01 |
| 695.35029 | 129.36 | 8.80  | 13.77 | 13.39 | 14.03 | 1.82E-44 | 3.65E-14 | 3.65E-14 | 3.65E-14 | 6.70E-01 | 8.69E-01 | 2.41E-01 |
| 695.36377 | 279.39 | 16.03 | 16.54 | 16.74 | 16.34 | 6.72E-02 | 2.47E-01 | 4.69E-02 | 6.87E-01 | 8.94E-01 | 9.01E-01 | 5.10E-01 |

|           |        |       |       |       |       |          |          |          |          |          |          |          |
|-----------|--------|-------|-------|-------|-------|----------|----------|----------|----------|----------|----------|----------|
| 695.50705 | 279.13 | 14.67 | 17.76 | 17.36 | 16.98 | 9.75E-10 | 5.18E-09 | 3.18E-07 | 3.15E-05 | 8.50E-01 | 4.20E-01 | 8.74E-01 |
| 695.59766 | 130.65 | 6.38  | 13.02 | 12.80 | 12.68 | 1.07E-46 | 3.65E-14 | 3.65E-14 | 3.65E-14 | 9.56E-01 | 8.64E-01 | 9.92E-01 |
| 695.6408  | 278.6  | 15.27 | 14.89 | 15.11 | 15.33 | 4.93E-01 | 5.75E-01 | 9.53E-01 | 9.97E-01 | 8.80E-01 | 4.93E-01 | 8.97E-01 |
| 695.81057 | 49.43  | 10.51 | 11.73 | 11.72 | 11.64 | 3.14E-03 | 9.84E-03 | 9.53E-03 | 2.52E-02 | 1.00E+00 | 9.96E-01 | 9.97E-01 |
| 695.84789 | 121.42 | 6.84  | 12.26 | 11.53 | 12.03 | 3.42E-27 | 5.16E-14 | 7.49E-14 | 6.94E-14 | 4.56E-01 | 9.71E-01 | 7.56E-01 |
| 695.93629 | 53.93  | 13.87 | 11.77 | 11.46 | 10.64 | 1.91E-10 | 3.37E-05 | 1.17E-06 | 2.26E-10 | 9.13E-01 | 8.86E-02 | 3.07E-01 |
| 696.11714 | 249.35 | 12.34 | 14.06 | 15.80 | 14.03 | 5.04E-07 | 1.93E-02 | 6.11E-08 | 2.74E-02 | 2.16E-02 | 1.00E+00 | 2.33E-02 |
| 696.13588 | 144.44 | 6.49  | 13.31 | 12.03 | 10.39 | 1.66E-33 | 3.65E-14 | 4.36E-14 | 8.51E-13 | 4.69E-02 | 1.75E-07 | 7.22E-03 |
| 696.4674  | 46.72  | 15.60 | 15.59 | 15.05 | 15.41 | 5.12E-01 | 1.00E+00 | 5.21E-01 | 9.68E-01 | 5.64E-01 | 9.74E-01 | 8.35E-01 |
| 696.55018 | 46.28  | 13.36 | 12.19 | 12.40 | 12.81 | 3.64E-04 | 3.63E-04 | 4.60E-03 | 2.48E-01 | 8.94E-01 | 1.73E-01 | 5.16E-01 |
| 696.60698 | 48.1   | 13.15 | 14.58 | 14.54 | 15.02 | 3.38E-08 | 3.33E-05 | 4.82E-05 | 6.59E-08 | 9.99E-01 | 5.24E-01 | 4.42E-01 |
| 696.67966 | 45.7   | 8.76  | 11.41 | 11.50 | 12.59 | 4.24E-09 | 4.69E-05 | 1.92E-05 | 4.10E-09 | 9.99E-01 | 2.17E-01 | 2.76E-01 |
| 696.69083 | 47.91  | 11.57 | 15.55 | 15.61 | 16.32 | 1.48E-27 | 7.59E-14 | 7.41E-14 | 4.43E-14 | 9.99E-01 | 2.74E-01 | 3.28E-01 |
| 696.92693 | 279.2  | 12.34 | 15.25 | 15.33 | 15.04 | 1.06E-07 | 4.63E-06 | 1.77E-06 | 4.17E-05 | 9.99E-01 | 9.86E-01 | 9.61E-01 |
| 696.93265 | 54.85  | 13.60 | 11.77 | 11.50 | 10.75 | 6.06E-06 | 4.91E-03 | 7.63E-04 | 4.41E-06 | 9.65E-01 | 2.96E-01 | 5.56E-01 |
| 697.00889 | 52.84  | 15.26 | 15.69 | 16.64 | 15.81 | 4.51E-04 | 5.42E-01 | 1.44E-04 | 3.44E-01 | 2.35E-02 | 9.85E-01 | 7.31E-02 |
| 697.07083 | 279.25 | 15.32 | 15.35 | 15.46 | 15.44 | 9.59E-01 | 1.00E+00 | 9.66E-01 | 9.79E-01 | 9.82E-01 | 9.90E-01 | 1.00E+00 |
| 697.10218 | 278.44 | 13.00 | 15.75 | 17.29 | 15.99 | 6.59E-12 | 1.04E-05 | 2.20E-12 | 2.53E-06 | 3.84E-02 | 9.76E-01 | 1.25E-01 |
| 697.11555 | 179.78 | 7.02  | 11.07 | 11.53 | 11.41 | 1.24E-14 | 5.97E-10 | 4.18E-12 | 6.56E-11 | 8.78E-01 | 9.50E-01 | 9.98E-01 |
| 697.21436 | 278.44 | 12.04 | 15.59 | 15.43 | 15.19 | 3.17E-09 | 1.05E-07 | 3.04E-07 | 5.09E-06 | 9.94E-01 | 9.28E-01 | 9.82E-01 |
| 697.21909 | 37.95  | 10.23 | 11.76 | 12.02 | 13.15 | 3.98E-12 | 1.65E-04 | 5.92E-06 | 6.73E-13 | 8.99E-01 | 1.78E-03 | 1.51E-02 |
| 697.36246 | 279.18 | 16.16 | 14.24 | 14.62 | 15.14 | 2.20E-07 | 2.14E-07 | 3.87E-05 | 1.82E-02 | 6.84E-01 | 5.79E-02 | 4.57E-01 |
| 697.4416  | 52.63  | 14.85 | 13.39 | 13.95 | 12.86 | 3.59E-12 | 1.59E-07 | 2.43E-03 | 3.71E-12 | 1.33E-01 | 2.04E-01 | 3.25E-04 |
| 697.49844 | 278.48 | 15.35 | 14.44 | 14.76 | 15.22 | 1.51E-02 | 1.66E-02 | 2.11E-01 | 9.75E-01 | 7.32E-01 | 7.81E-02 | 4.84E-01 |
| 697.64925 | 277.95 | 15.61 | 14.61 | 14.76 | 15.36 | 2.98E-03 | 5.96E-03 | 2.42E-02 | 8.45E-01 | 9.66E-01 | 9.39E-02 | 2.34E-01 |
| 697.6852  | 48.95  | 11.41 | 12.25 | 12.43 | 12.51 | 3.54E-03 | 5.56E-02 | 1.06E-02 | 7.15E-03 | 9.49E-01 | 8.77E-01 | 9.96E-01 |
| 697.78892 | 276.96 | 15.35 | 15.17 | 15.42 | 15.42 | 8.42E-01 | 9.39E-01 | 9.94E-01 | 9.95E-01 | 8.52E-01 | 8.62E-01 | 1.00E+00 |
| 697.80444 | 50.8   | 13.55 | 12.23 | 12.17 | 12.41 | 7.47E-05 | 5.78E-04 | 2.54E-04 | 5.47E-03 | 9.98E-01 | 9.57E-01 | 9.07E-01 |
| 697.95759 | 127.64 | 7.23  | 12.82 | 12.81 | 12.40 | 8.13E-45 | 3.65E-14 | 3.65E-14 | 3.65E-14 | 1.00E+00 | 6.81E-01 | 6.93E-01 |
| 698.01288 | 53.59  | 12.52 | 12.36 | 12.61 | 12.60 | 9.56E-01 | 9.88E-01 | 9.97E-01 | 9.98E-01 | 9.56E-01 | 9.64E-01 | 1.00E+00 |
| 698.10486 | 199.36 | 8.02  | 18.04 | 17.98 | 15.78 | 2.87E-54 | 3.65E-14 | 3.65E-14 | 3.65E-14 | 1.00E+00 | 4.89E-04 | 6.38E-04 |
| 698.15526 | 127.59 | 7.23  | 12.21 | 12.57 | 11.88 | 2.14E-38 | 3.65E-14 | 3.65E-14 | 3.76E-14 | 7.78E-01 | 8.40E-01 | 2.93E-01 |
| 698.44491 | 52.46  | 14.28 | 13.59 | 14.09 | 13.05 | 6.41E-03 | 2.34E-01 | 9.55E-01 | 5.89E-03 | 5.33E-01 | 4.86E-01 | 3.23E-02 |
| 698.46108 | 46.52  | 14.01 | 12.04 | 12.30 | 13.00 | 2.55E-06 | 4.78E-06 | 7.81E-05 | 5.71E-02 | 9.15E-01 | 9.26E-02 | 3.14E-01 |
| 698.55275 | 46.9   | 16.58 | 17.47 | 17.32 | 17.19 | 1.19E-10 | 3.39E-10 | 1.37E-07 | 3.79E-05 | 6.77E-01 | 1.81E-01 | 7.77E-01 |
| 698.68604 | 48.43  | 12.04 | 13.39 | 13.44 | 14.36 | 5.11E-12 | 2.61E-05 | 9.95E-06 | 9.71E-13 | 9.98E-01 | 8.80E-03 | 1.33E-02 |
| 698.77496 | 50.26  | 9.10  | 9.67  | 9.46  | 11.70 | 5.61E-05 | 7.33E-01 | 9.13E-01 | 4.49E-05 | 9.83E-01 | 3.46E-03 | 8.45E-04 |
| 698.92366 | 279.85 | 15.15 | 14.85 | 15.20 | 15.56 | 2.30E-01 | 7.82E-01 | 9.99E-01 | 5.94E-01 | 7.09E-01 | 1.55E-01 | 7.02E-01 |
| 699.06345 | 278.83 | 15.77 | 14.27 | 14.80 | 15.16 | 2.17E-05 | 7.51E-06 | 7.03E-03 | 2.06E-01 | 3.20E-01 | 2.80E-02 | 6.54E-01 |
| 699.1058  | 200.99 | 10.05 | 14.63 | 14.72 | 13.77 | 3.47E-13 | 1.06E-10 | 3.20E-11 | 3.56E-07 | 9.99E-01 | 5.91E-01 | 5.03E-01 |
| 699.21347 | 279.37 | 15.84 | 16.52 | 16.61 | 16.36 | 1.51E-02 | 4.38E-02 | 1.61E-02 | 2.02E-01 | 9.89E-01 | 9.37E-01 | 8.06E-01 |
| 699.35315 | 111.02 | 9.43  | 13.83 | 13.52 | 14.14 | 3.37E-43 | 3.65E-14 | 3.65E-14 | 3.65E-14 | 7.33E-01 | 7.62E-01 | 1.95E-01 |
| 699.35683 | 276.39 | 16.41 | 17.79 | 17.62 | 17.33 | 2.54E-07 | 6.04E-07 | 1.27E-05 | 2.46E-03 | 9.09E-01 | 3.05E-01 | 6.88E-01 |
| 699.36747 | 279.36 | 16.32 | 14.67 | 14.76 | 15.47 | 3.65E-08 | 2.96E-07 | 1.09E-06 | 2.51E-02 | 9.90E-01 | 5.12E-02 | 1.00E-01 |
| 699.50216 | 279.09 | 15.74 | 19.18 | 19.18 | 18.11 | 1.13E-30 | 3.74E-14 | 3.72E-14 | 1.80E-13 | 1.00E+00 | 2.23E-03 | 2.01E-03 |
| 699.60659 | 114.83 | 7.77  | 13.04 | 12.51 | 12.98 | 6.05E-29 | 4.59E-14 | 7.23E-14 | 5.74E-14 | 6.70E-01 | 9.99E-01 | 7.69E-01 |
| 699.64843 | 279.03 | 15.66 | 18.20 | 18.35 | 17.74 | 7.90E-21 | 7.47E-14 | 7.54E-14 | 3.09E-11 | 9.50E-01 | 4.10E-01 | 1.61E-01 |
| 699.78448 | 279.06 | 16.29 | 17.46 | 17.51 | 17.04 | 8.15E-06 | 6.97E-05 | 2.68E-05 | 2.82E-02 | 9.98E-01 | 4.29E-01 | 3.27E-01 |
| 699.89393 | 54.56  | 15.50 | 12.10 | 13.03 | 11.59 | 1.68E-10 | 5.77E-08 | 1.04E-04 | 1.12E-09 | 3.93E-01 | 8.33E-01 | 8.14E-02 |
| 699.92983 | 279.31 | 15.91 | 15.63 | 15.87 | 15.72 | 7.43E-01 | 7.52E-01 | 9.99E-01 | 9.20E-01 | 8.26E-01 | 9.88E-01 | 9.57E-01 |
| 700.01411 | 53.11  | 13.60 | 18.26 | 18.20 | 16.73 | 1.78E-20 | 7.27E-14 | 7.43E-14 | 1.48E-08 | 9.99E-01 | 1.94E-02 | 2.51E-02 |
| 700.07257 | 277.5  | 16.32 | 15.28 | 15.62 | 15.65 | 4.41E-03 | 2.26E-03 | 6.95E-02 | 1.14E-01 | 6.71E-01 | 6.18E-01 | 9.99E-01 |
| 700.16874 | 75.83  | 12.32 | 16.39 | 12.20 | 15.06 | 2.86E-13 | 2.18E-10 | 9.97E-01 | 4.71E-05 | 1.91E-10 | 1.41E-01 | 3.33E-05 |
| 700.22118 | 279.21 | 16.26 | 15.25 | 15.19 | 15.55 | 1.60E-03 | 5.76E-03 | 2.45E-03 | 1.04E-01 | 9.97E-01 | 7.96E-01 | 6.71E-01 |
| 700.36098 | 278.94 | 15.85 | 15.20 | 15.31 | 15.55 | 1.46E-01 | 1.37E-01 | 2.70E-01 | 7.62E-01 | 9.84E-01 | 6.93E-01 | 8.75E-01 |
| 700.41265 | 46.02  | 15.25 | 11.90 | 11.66 | 12.48 | 3.08E-18 | 1.15E-13 | 7.41E-14 | 8.04E-10 | 9.41E-01 | 5.18E-01 | 2.15E-01 |
| 700.44951 | 53.08  | 14.50 | 13.81 | 13.84 | 12.84 | 5.67E-04 | 2.59E-01 | 2.80E-01 | 1.41E-04 | 1.00E+00 | 7.14E-02 | 5.84E-02 |
| 700.46424 | 48.77  | 11.94 | 11.15 | 10.33 | 10.63 | 1.52E-01 | 7.14E-01 | 1.29E-01 | 3.17E-01 | 7.00E-01 | 9.10E-01 | 9.80E-01 |
| 700.51742 | 49.65  | 13.34 | 14.97 | 14.28 | 13.64 | 1.69E-02 | 1.35E-02 | 2.90E-01 | 9.48E-01 | 5.84E-01 | 8.91E-02 | 6.66E-01 |
| 700.54977 | 45.92  | 17.05 | 17.55 | 17.46 | 17.29 | 3.39E-03 | 3.02E-03 | 2.21E-02 | 3.73E-01 | 9.20E-01 | 3.00E-01 | 6.61E-01 |
| 700.63368 | 46.2   | 12.58 | 17.58 | 17.02 | 17.47 | 5.20E-30 | 4.01E-14 | 6.81E-14 | 5.03E-14 | 5.56E-01 | 9.94E-01 | 7.37E-01 |
| 700.65093 | 49.41  | 9.45  | 9.63  | 9.33  | 10.71 | 1.37E-01 | 9.91E-01 | 9.97E-01 | 1.88E-01 | 9.61E-01 | 3.44E-01 | 1.38E-01 |
| 700.67352 | 49.43  | 13.14 | 12.87 | 12.61 | 12.38 | 2.66E-01 | 8.99E-01 | 5.16E-01 | 2.32E-01 | 9.15E-01 | 6.37E-01 | 9.44E-01 |
| 700.77653 | 51.81  | 8.56  | 10.23 | 9.54  | 11.88 | 4.55E-08 | 7.52E-03 | 2.25E-01 | 1.03E-08 | 5.58E-01 | 1.43E-02 | 1.28E-04 |
| 700.8827  | 51.36  | 17.12 | 18.20 | 18.78 | 17.12 | 1.99E-09 | 1.01E-03 | 6.95E-08 | 1.00E+00 | 1.87E-01 | 2.22E-03 | 4.00E-07 |
| 700.93107 | 279.4  | 15.51 | 14.96 | 14.94 | 15.12 | 3.52E-01 | 4.18E-01 | 3.76E-01 | 7.12E-01 | 1.00E+00 | 9.75E-01 | 9.64E-01 |
| 701.01206 | 53.28  | 12.58 | 14.94 | 14.65 | 14.26 | 1.14E-07 | 3.44E-07 | 7.48E-06 | 7.36E-04 | 9.10E-01 | 4.23E-01 | 8.10E-01 |
| 701.07188 | 278.92 | 15.37 | 14.40 | 14.68 | 14.88 | 3.67E-02 | 2.35E-02 | 1.67E-01 | 4.98E-01 | 8.55E-01 | 5.36E-01 | 9.39E-01 |

|           |        |       |       |       |       |          |          |          |          |          |          |          |
|-----------|--------|-------|-------|-------|-------|----------|----------|----------|----------|----------|----------|----------|
| 701.2176  | 279.32 | 15.90 | 15.86 | 15.91 | 15.84 | 9.95E-01 | 9.99E-01 | 1.00E+00 | 9.97E-01 | 9.98E-01 | 1.00E+00 | 9.94E-01 |
| 701.36212 | 279.36 | 16.42 | 16.66 | 16.84 | 16.46 | 3.17E-01 | 7.54E-01 | 3.09E-01 | 9.97E-01 | 8.94E-01 | 8.77E-01 | 4.72E-01 |
| 701.44692 | 53.27  | 13.48 | 13.72 | 13.45 | 12.18 | 9.57E-03 | 9.51E-01 | 1.00E+00 | 3.29E-02 | 9.38E-01 | 9.55E-03 | 4.55E-02 |
| 701.498   | 279.34 | 13.63 | 17.45 | 17.58 | 16.92 | 1.32E-22 | 7.43E-14 | 7.25E-14 | 3.04E-13 | 9.88E-01 | 5.79E-01 | 3.78E-01 |
| 701.51796 | 52.74  | 8.31  | 10.73 | 10.09 | 9.73  | 7.61E-03 | 4.54E-03 | 6.14E-02 | 2.16E-01 | 8.12E-01 | 5.47E-01 | 9.65E-01 |
| 701.55844 | 27.88  | 18.84 | 16.91 | 17.23 | 17.28 | 4.45E-24 | 6.05E-14 | 7.54E-14 | 8.09E-14 | 3.04E-01 | 2.15E-01 | 9.94E-01 |
| 701.64014 | 279.25 | 14.85 | 15.99 | 16.23 | 15.83 | 2.34E-05 | 8.51E-04 | 2.48E-05 | 7.29E-03 | 8.56E-01 | 9.60E-01 | 5.78E-01 |
| 701.78482 | 279.06 | 15.39 | 16.17 | 16.45 | 16.08 | 3.86E-04 | 1.24E-02 | 2.06E-04 | 4.23E-02 | 7.04E-01 | 9.87E-01 | 5.06E-01 |
| 701.88462 | 52.19  | 14.37 | 13.33 | 13.46 | 12.32 | 4.79E-06 | 2.51E-02 | 6.11E-02 | 7.56E-07 | 9.86E-01 | 4.73E-02 | 1.73E-02 |
| 701.92347 | 279.32 | 16.07 | 18.11 | 18.17 | 17.66 | 7.96E-15 | 5.80E-12 | 8.94E-13 | 1.49E-07 | 9.95E-01 | 4.09E-01 | 2.79E-01 |
| 701.99221 | 54.06  | 16.18 | 12.59 | 13.48 | 13.73 | 1.10E-05 | 7.42E-06 | 1.13E-03 | 5.90E-03 | 6.23E-01 | 4.41E-01 | 9.87E-01 |
| 702.01068 | 52.83  | 8.60  | 11.95 | 11.53 | 10.75 | 9.88E-06 | 1.63E-05 | 1.87E-04 | 1.55E-02 | 9.34E-01 | 3.63E-01 | 7.10E-01 |
| 702.07182 | 279.24 | 15.38 | 15.24 | 15.56 | 15.43 | 7.68E-01 | 9.63E-01 | 9.28E-01 | 9.98E-01 | 7.12E-01 | 9.26E-01 | 9.76E-01 |
| 702.21393 | 41.97  | 9.37  | 8.81  | 8.88  | 10.89 | 9.11E-04 | 7.16E-01 | 7.82E-01 | 2.94E-02 | 9.99E-01 | 1.55E-03 | 2.11E-03 |
| 702.21658 | 279.13 | 14.20 | 16.21 | 16.04 | 15.87 | 1.01E-05 | 4.05E-05 | 1.73E-04 | 1.36E-03 | 9.82E-01 | 8.84E-01 | 9.82E-01 |
| 702.36152 | 279.16 | 15.12 | 14.60 | 15.00 | 15.42 | 2.23E-01 | 4.94E-01 | 9.87E-01 | 8.65E-01 | 7.15E-01 | 1.61E-01 | 7.07E-01 |
| 702.40964 | 46.04  | 16.14 | 14.39 | 13.51 | 14.82 | 6.61E-07 | 1.08E-03 | 1.62E-07 | 2.92E-02 | 2.44E-01 | 8.13E-01 | 3.58E-02 |
| 702.46515 | 51.15  | 9.63  | 12.47 | 7.98  | 12.32 | 4.69E-08 | 2.85E-03 | 1.71E-01 | 7.04E-03 | 8.70E-07 | 9.98E-01 | 3.84E-06 |
| 702.49808 | 280.93 | 14.03 | 15.25 | 15.52 | 15.22 | 1.91E-02 | 8.37E-02 | 1.91E-02 | 1.08E-01 | 9.55E-01 | 1.00E+00 | 9.46E-01 |
| 702.5034  | 32.17  | 17.61 | 13.89 | 14.55 | 14.39 | 3.37E-19 | 7.54E-14 | 1.49E-12 | 6.44E-13 | 3.53E-01 | 6.34E-01 | 9.77E-01 |
| 702.54136 | 42.5   | 16.08 | 12.31 | 12.60 | 13.47 | 8.34E-44 | 3.65E-14 | 3.65E-14 | 5.74E-14 | 6.15E-01 | 1.98E-05 | 2.05E-03 |
| 702.55142 | 39.3   | 18.12 | 16.39 | 16.18 | 16.66 | 4.36E-27 | 7.09E-14 | 4.10E-14 | 8.43E-14 | 6.22E-01 | 3.99E-01 | 3.16E-02 |
| 702.63265 | 46.52  | 13.98 | 18.08 | 17.87 | 18.18 | 1.50E-43 | 3.65E-14 | 3.65E-14 | 3.65E-14 | 8.76E-01 | 9.82E-01 | 6.83E-01 |
| 702.70144 | 63.19  | 11.09 | 11.82 | 12.04 | 11.64 | 1.32E-01 | 3.04E-01 | 1.03E-01 | 5.74E-01 | 9.55E-01 | 9.78E-01 | 8.01E-01 |
| 702.86781 | 54.21  | 14.79 | 13.17 | 13.65 | 12.89 | 3.85E-03 | 1.70E-02 | 1.52E-01 | 4.32E-03 | 8.25E-01 | 9.61E-01 | 5.41E-01 |
| 702.8776  | 51.53  | 15.20 | 16.24 | 16.65 | 15.24 | 1.62E-05 | 1.16E-02 | 1.21E-04 | 9.99E-01 | 6.40E-01 | 2.76E-02 | 5.31E-04 |
| 703.01746 | 53.49  | 14.02 | 18.42 | 17.42 | 17.13 | 9.55E-24 | 5.03E-14 | 7.65E-14 | 1.62E-12 | 6.01E-02 | 1.04E-02 | 8.93E-01 |
| 703.03669 | 63.03  | 10.78 | 11.98 | 13.46 | 11.87 | 2.74E-06 | 6.56E-02 | 4.09E-07 | 1.26E-01 | 1.69E-02 | 9.97E-01 | 1.10E-02 |
| 703.07575 | 279.46 | 15.95 | 15.83 | 15.50 | 15.83 | 5.43E-01 | 9.79E-01 | 4.81E-01 | 9.82E-01 | 7.50E-01 | 1.00E+00 | 7.61E-01 |
| 703.21909 | 279.05 | 15.91 | 15.39 | 15.68 | 15.75 | 3.01E-01 | 2.24E-01 | 8.27E-01 | 9.34E-01 | 7.24E-01 | 6.05E-01 | 9.96E-01 |
| 703.36311 | 279.4  | 16.78 | 19.09 | 19.07 | 18.42 | 3.01E-15 | 8.35E-13 | 7.57E-13 | 7.31E-07 | 1.00E+00 | 1.36E-01 | 1.47E-01 |
| 703.50391 | 279.14 | 13.35 | 19.30 | 19.33 | 18.21 | 2.89E-24 | 7.12E-14 | 7.12E-14 | 1.83E-13 | 1.00E+00 | 2.84E-01 | 2.54E-01 |
| 703.51296 | 50.5   | 15.91 | 16.09 | 13.92 | 14.91 | 4.80E-05 | 9.83E-01 | 3.34E-04 | 1.97E-01 | 1.36E-04 | 1.09E-01 | 2.18E-01 |
| 703.52452 | 53.33  | 10.74 | 12.19 | 10.78 | 12.35 | 1.24E-03 | 2.53E-02 | 1.00E+00 | 1.22E-02 | 3.67E-02 | 9.90E-01 | 1.83E-02 |
| 703.57419 | 27.71  | 20.04 | 18.11 | 18.05 | 18.73 | 3.56E-18 | 8.12E-14 | 7.54E-14 | 2.06E-07 | 9.93E-01 | 4.86E-02 | 2.24E-02 |
| 703.6451  | 279.01 | 16.54 | 19.50 | 19.49 | 18.55 | 3.36E-25 | 6.43E-14 | 6.38E-14 | 8.08E-11 | 1.00E+00 | 7.17E-03 | 7.59E-03 |
| 703.74986 | 49.9   | 14.53 | 10.96 | 10.01 | 9.83  | 9.38E-20 | 8.91E-11 | 7.55E-14 | 7.38E-14 | 2.50E-01 | 1.41E-01 | 9.85E-01 |
| 703.78875 | 279.1  | 16.17 | 17.60 | 17.71 | 17.02 | 6.68E-09 | 4.63E-07 | 3.75E-08 | 7.52E-03 | 9.75E-01 | 1.53E-01 | 5.69E-02 |
| 703.93309 | 279.41 | 16.28 | 18.81 | 18.86 | 17.85 | 1.59E-23 | 7.42E-14 | 7.09E-14 | 2.15E-08 | 9.98E-01 | 1.72E-03 | 8.29E-04 |
| 704.01884 | 54.8   | 12.48 | 17.00 | 15.03 | 15.77 | 3.40E-17 | 7.47E-14 | 8.30E-07 | 6.94E-10 | 3.89E-04 | 6.89E-02 | 4.51E-01 |
| 704.07448 | 279.31 | 15.62 | 16.48 | 16.61 | 16.36 | 8.37E-04 | 6.78E-03 | 9.95E-04 | 3.46E-02 | 9.59E-01 | 9.70E-01 | 7.85E-01 |
| 704.19232 | 67.29  | 9.92  | 14.80 | 13.96 | 13.21 | 5.00E-23 | 6.01E-14 | 7.41E-14 | 6.18E-11 | 2.63E-01 | 4.93E-03 | 3.74E-01 |
| 704.22283 | 279.24 | 15.98 | 14.83 | 15.29 | 15.50 | 9.68E-03 | 4.26E-03 | 1.69E-01 | 5.07E-01 | 5.40E-01 | 2.43E-01 | 9.37E-01 |
| 704.3595  | 278.27 | 15.68 | 15.10 | 15.31 | 15.60 | 3.53E-01 | 3.54E-01 | 7.09E-01 | 9.96E-01 | 9.39E-01 | 5.36E-01 | 8.58E-01 |
| 704.40737 | 46.31  | 15.67 | 13.20 | 11.82 | 13.28 | 4.21E-10 | 5.75E-05 | 8.15E-11 | 1.63E-04 | 6.55E-02 | 9.99E-01 | 5.54E-02 |
| 704.49892 | 46.11  | 15.87 | 16.45 | 16.16 | 15.90 | 1.14E-01 | 1.16E-01 | 6.66E-01 | 9.99E-01 | 6.98E-01 | 1.95E-01 | 7.80E-01 |
| 704.52193 | 26.96  | 21.52 | 21.26 | 21.02 | 20.80 | 1.00E-04 | 3.36E-01 | 7.99E-03 | 6.40E-05 | 4.56E-01 | 3.02E-02 | 5.24E-01 |
| 704.57803 | 28.19  | 18.92 | 13.70 | 14.80 | 15.62 | 2.70E-21 | 7.03E-14 | 1.01E-13 | 2.72E-09 | 1.31E-01 | 1.62E-03 | 3.88E-01 |
| 704.62253 | 45.22  | 9.66  | 12.20 | 11.78 | 12.68 | 4.90E-09 | 1.48E-06 | 6.60E-05 | 2.04E-08 | 8.30E-01 | 7.82E-01 | 2.86E-01 |
| 704.63863 | 48.34  | 8.01  | 15.55 | 15.12 | 15.62 | 1.35E-41 | 3.65E-14 | 3.65E-14 | 3.65E-14 | 8.48E-01 | 9.99E-01 | 7.93E-01 |
| 704.72041 | 48.09  | 8.99  | 11.22 | 11.60 | 12.49 | 6.62E-16 | 1.30E-07 | 4.20E-10 | 7.56E-14 | 7.73E-01 | 1.03E-02 | 1.18E-01 |
| 704.87147 | 55.82  | 10.21 | 10.99 | 11.43 | 10.75 | 1.82E-01 | 5.02E-01 | 1.28E-01 | 7.82E-01 | 8.73E-01 | 9.77E-01 | 6.59E-01 |
| 704.88502 | 266.25 | 15.98 | 14.12 | 15.39 | 14.79 | 1.14E-07 | 5.47E-08 | 2.24E-01 | 1.31E-03 | 5.41E-04 | 1.86E-01 | 2.52E-01 |
| 704.97161 | 268.66 | 15.86 | 14.95 | 14.97 | 15.27 | 1.46E-02 | 2.41E-02 | 2.47E-02 | 2.69E-01 | 1.00E+00 | 7.84E-01 | 7.98E-01 |
| 704.99507 | 53.82  | 12.76 | 10.72 | 11.48 | 11.87 | 3.21E-02 | 1.73E-02 | 2.38E-01 | 5.87E-01 | 7.03E-01 | 3.92E-01 | 9.49E-01 |
| 705.02758 | 262.44 | 16.09 | 14.46 | 15.19 | 15.05 | 5.16E-04 | 1.72E-04 | 8.29E-02 | 4.15E-02 | 2.49E-01 | 4.69E-01 | 9.85E-01 |
| 705.05564 | 264.83 | 16.36 | 16.62 | 16.57 | 16.92 | 4.75E-01 | 8.76E-01 | 9.21E-01 | 3.81E-01 | 9.99E-01 | 8.35E-01 | 7.70E-01 |
| 705.12346 | 62.71  | 14.62 | 13.15 | 14.23 | 13.36 | 8.99E-06 | 3.54E-05 | 5.95E-01 | 8.40E-04 | 5.80E-03 | 9.20E-01 | 4.90E-02 |
| 705.13776 | 265.74 | 16.69 | 16.76 | 16.73 | 17.29 | 2.80E-01 | 9.96E-01 | 9.99E-01 | 2.87E-01 | 1.00E+00 | 4.28E-01 | 3.64E-01 |
| 705.21909 | 274.9  | 17.19 | 18.26 | 18.10 | 17.93 | 1.92E-02 | 1.89E-02 | 6.00E-02 | 1.99E-01 | 9.72E-01 | 8.26E-01 | 9.71E-01 |
| 705.23057 | 261.66 | 13.08 | 15.34 | 15.44 | 14.97 | 4.53E-04 | 2.23E-03 | 1.09E-03 | 1.88E-02 | 9.99E-01 | 9.48E-01 | 8.95E-01 |
| 705.3088  | 264.77 | 14.93 | 16.14 | 16.44 | 16.50 | 4.12E-04 | 1.85E-02 | 1.48E-03 | 1.44E-03 | 8.93E-01 | 8.45E-01 | 9.99E-01 |
| 705.36112 | 276.85 | 16.94 | 17.45 | 17.91 | 17.28 | 2.46E-02 | 3.75E-01 | 1.20E-02 | 7.23E-01 | 4.90E-01 | 9.57E-01 | 2.33E-01 |
| 705.3812  | 267.54 | 15.45 | 13.35 | 14.11 | 14.54 | 1.23E-07 | 2.87E-08 | 6.97E-04 | 5.04E-02 | 1.36E-01 | 7.23E-03 | 6.50E-01 |
| 705.38981 | 263.94 | 16.60 | 16.09 | 16.25 | 16.62 | 2.35E-01 | 3.17E-01 | 6.29E-01 | 1.00E+00 | 9.55E-01 | 3.42E-01 | 6.42E-01 |
| 705.47045 | 267.27 | 16.02 | 14.61 | 14.79 | 15.11 | 1.62E-03 | 1.86E-03 | 8.24E-03 | 1.06E-01 | 9.68E-01 | 6.05E-01 | 8.55E-01 |
| 705.50601 | 277.52 | 15.70 | 16.05 | 15.80 | 15.78 | 7.81E-01 | 7.42E-01 | 9.91E-01 | 9.96E-01 | 8.96E-01 | 8.84E-01 | 1.00E+00 |
| 705.52565 | 24.73  | 20.56 | 19.79 | 19.60 | 19.37 | 1.05E-13 | 1.62E-06 | 1.10E-09 | 6.56E-13 | 5.72E-01 | 3.80E-02 | 4.64E-01 |

|           |        |       |       |       |       |          |          |          |          |          |          |          |
|-----------|--------|-------|-------|-------|-------|----------|----------|----------|----------|----------|----------|----------|
| 705.53592 | 267.79 | 16.70 | 14.82 | 15.15 | 14.84 | 3.59E-06 | 2.63E-05 | 6.68E-04 | 5.69E-05 | 8.54E-01 | 1.00E+00 | 8.87E-01 |
| 705.55597 | 266.62 | 16.17 | 14.42 | 14.71 | 14.93 | 1.88E-05 | 2.44E-05 | 5.49E-04 | 6.64E-03 | 8.69E-01 | 5.74E-01 | 9.47E-01 |
| 705.63526 | 275.79 | 15.21 | 14.03 | 14.48 | 14.81 | 3.65E-03 | 1.81E-03 | 1.07E-01 | 6.21E-01 | 5.19E-01 | 1.06E-01 | 7.71E-01 |
| 705.64792 | 278.78 | 16.64 | 18.43 | 18.44 | 17.67 | 7.89E-12 | 6.57E-10 | 3.56E-10 | 1.10E-03 | 1.00E+00 | 3.47E-02 | 2.92E-02 |
| 705.70215 | 261.76 | 16.22 | 14.13 | 14.66 | 15.08 | 2.44E-06 | 1.26E-06 | 4.39E-04 | 2.39E-02 | 5.45E-01 | 1.04E-01 | 7.44E-01 |
| 705.78076 | 279.46 | 14.82 | 14.47 | 14.14 | 14.69 | 1.84E-01 | 6.96E-01 | 1.49E-01 | 9.78E-01 | 7.56E-01 | 9.20E-01 | 3.76E-01 |
| 705.79125 | 277.43 | 16.31 | 19.09 | 18.81 | 18.39 | 8.20E-19 | 7.36E-14 | 1.01E-13 | 6.44E-10 | 7.97E-01 | 1.23E-01 | 5.38E-01 |
| 705.89947 | 52.4   | 11.22 | 12.28 | 11.22 | 12.55 | 8.82E-02 | 3.46E-01 | 1.00E+00 | 1.78E-01 | 3.67E-01 | 9.78E-01 | 1.94E-01 |
| 705.93904 | 273.11 | 16.51 | 20.41 | 20.08 | 19.24 | 1.54E-35 | 3.65E-14 | 3.65E-14 | 7.55E-14 | 6.47E-01 | 4.88E-04 | 2.13E-02 |
| 706.02614 | 51.37  | 9.31  | 11.26 | 10.28 | 11.54 | 8.75E-05 | 1.02E-03 | 2.30E-01 | 1.93E-04 | 2.40E-01 | 9.57E-01 | 9.07E-02 |
| 706.03033 | 184.14 | 6.84  | 12.15 | 11.74 | 12.17 | 3.73E-32 | 3.76E-14 | 4.90E-14 | 3.92E-14 | 7.87E-01 | 1.00E+00 | 7.74E-01 |
| 706.08247 | 273.97 | 16.58 | 20.96 | 20.68 | 19.78 | 5.43E-39 | 3.65E-14 | 3.65E-14 | 7.03E-14 | 7.81E-01 | 1.03E-03 | 2.01E-02 |
| 706.22563 | 273.61 | 16.52 | 20.88 | 20.61 | 19.69 | 1.73E-33 | 3.65E-14 | 3.67E-14 | 7.36E-14 | 8.43E-01 | 3.85E-03 | 4.09E-02 |
| 706.3546  | 44     | 17.88 | 9.38  | 8.70  | 11.67 | 1.14E-38 | 3.65E-14 | 3.65E-14 | 7.48E-14 | 7.05E-01 | 2.97E-03 | 4.32E-05 |
| 706.3687  | 273.3  | 16.91 | 20.42 | 20.18 | 19.33 | 3.37E-28 | 3.92E-14 | 5.30E-14 | 4.43E-13 | 8.47E-01 | 2.97E-03 | 3.25E-02 |
| 706.49669 | 46.68  | 14.81 | 16.93 | 16.60 | 16.15 | 2.73E-05 | 3.16E-05 | 5.71E-04 | 2.35E-02 | 8.89E-01 | 3.65E-01 | 7.83E-01 |
| 706.5083  | 275.38 | 14.25 | 19.49 | 19.19 | 17.87 | 2.40E-23 | 6.98E-14 | 7.54E-14 | 1.16E-10 | 9.35E-01 | 1.29E-02 | 6.00E-02 |
| 706.53778 | 26.49  | 22.77 | 21.41 | 21.28 | 21.69 | 7.52E-39 | 3.65E-14 | 3.65E-14 | 6.94E-14 | 5.65E-01 | 4.49E-02 | 6.85E-04 |
| 706.58364 | 46.08  | 12.89 | 14.37 | 13.84 | 14.11 | 7.18E-02 | 6.19E-02 | 3.64E-01 | 1.85E-01 | 8.21E-01 | 9.77E-01 | 9.73E-01 |
| 706.63728 | 49.39  | 7.92  | 10.04 | 8.96  | 11.11 | 2.96E-09 | 7.38E-05 | 1.20E-01 | 2.13E-09 | 1.23E-01 | 1.41E-01 | 1.36E-04 |
| 706.65796 | 274.29 | 16.55 | 17.98 | 17.77 | 17.36 | 2.07E-06 | 3.11E-06 | 7.62E-05 | 2.33E-02 | 8.84E-01 | 1.56E-01 | 4.97E-01 |
| 706.72135 | 48.74  | 9.52  | 11.51 | 11.28 | 13.47 | 5.90E-10 | 1.33E-03 | 5.32E-03 | 5.00E-11 | 9.75E-01 | 3.54E-03 | 7.29E-04 |
| 706.79758 | 273.04 | 16.44 | 16.78 | 16.13 | 16.42 | 2.55E-01 | 6.96E-01 | 7.41E-01 | 1.00E+00 | 1.74E-01 | 6.88E-01 | 8.13E-01 |
| 706.89714 | 51.21  | 12.92 | 12.74 | 11.82 | 12.51 | 1.35E-01 | 9.82E-01 | 1.08E-01 | 8.48E-01 | 2.64E-01 | 9.73E-01 | 5.35E-01 |
| 706.94368 | 273.06 | 16.72 | 15.44 | 15.70 | 15.52 | 3.10E-04 | 7.18E-04 | 9.94E-03 | 2.57E-03 | 8.70E-01 | 9.95E-01 | 9.58E-01 |
| 707.08037 | 279.02 | 16.06 | 14.84 | 14.83 | 15.36 | 3.18E-04 | 1.11E-03 | 8.29E-04 | 1.48E-01 | 1.00E+00 | 4.28E-01 | 3.97E-01 |
| 707.09591 | 256.02 | 14.58 | 12.72 | 13.25 | 13.70 | 1.49E-02 | 9.05E-03 | 1.00E-01 | 4.52E-01 | 8.16E-01 | 3.98E-01 | 8.86E-01 |
| 707.2212  | 279.35 | 15.65 | 18.16 | 18.21 | 17.34 | 2.73E-17 | 1.07E-13 | 8.06E-14 | 5.63E-07 | 9.98E-01 | 5.02E-02 | 2.87E-02 |
| 707.35639 | 279.27 | 15.88 | 15.88 | 16.16 | 15.83 | 5.87E-01 | 1.00E+00 | 6.82E-01 | 9.98E-01 | 6.98E-01 | 9.99E-01 | 6.18E-01 |
| 707.50825 | 278.86 | 15.73 | 18.50 | 18.60 | 17.98 | 8.66E-18 | 1.09E-13 | 7.82E-14 | 1.52E-09 | 9.90E-01 | 4.39E-01 | 2.72E-01 |
| 707.54072 | 24.91  | 21.50 | 20.03 | 19.87 | 20.19 | 1.01E-39 | 3.65E-14 | 3.65E-14 | 4.05E-14 | 4.98E-01 | 4.92E-01 | 2.86E-02 |
| 707.64811 | 279.3  | 16.61 | 19.35 | 19.30 | 18.72 | 3.62E-24 | 7.14E-14 | 7.16E-14 | 1.18E-12 | 9.98E-01 | 1.06E-01 | 1.46E-01 |
| 707.71614 | 49.03  | 9.93  | 11.46 | 12.06 | 12.16 | 1.23E-05 | 9.24E-03 | 7.77E-05 | 6.12E-05 | 6.20E-01 | 5.16E-01 | 9.97E-01 |
| 707.79011 | 277.57 | 16.29 | 18.90 | 18.72 | 18.00 | 7.28E-22 | 7.25E-14 | 7.46E-14 | 3.13E-09 | 9.12E-01 | 6.58E-03 | 4.12E-02 |
| 707.93219 | 279.32 | 15.70 | 19.14 | 19.13 | 18.15 | 1.61E-27 | 4.85E-14 | 4.72E-14 | 8.81E-13 | 1.00E+00 | 1.16E-02 | 1.22E-02 |
| 707.9994  | 52.6   | 18.62 | 20.12 | 20.39 | 19.24 | 5.46E-20 | 2.19E-13 | 7.49E-14 | 6.23E-03 | 4.73E-01 | 5.91E-05 | 5.65E-08 |
| 708.07202 | 279.08 | 13.58 | 18.07 | 18.11 | 17.43 | 2.70E-32 | 3.72E-14 | 3.67E-14 | 7.19E-14 | 9.99E-01 | 3.50E-01 | 2.82E-01 |
| 708.10934 | 274.32 | 15.92 | 16.29 | 16.64 | 16.59 | 4.31E-02 | 5.48E-01 | 4.89E-02 | 9.17E-02 | 6.16E-01 | 7.38E-01 | 9.99E-01 |
| 708.22182 | 279.21 | 16.04 | 16.17 | 16.12 | 16.31 | 8.06E-01 | 9.62E-01 | 9.92E-01 | 7.64E-01 | 9.97E-01 | 9.63E-01 | 9.01E-01 |
| 708.25716 | 233.11 | 15.93 | 14.10 | 14.40 | 14.25 | 7.98E-14 | 5.22E-12 | 5.76E-09 | 5.99E-10 | 6.06E-01 | 9.36E-01 | 9.29E-01 |
| 708.35082 | 44.84  | 18.76 | 12.52 | 11.18 | 12.92 | 1.13E-29 | 7.21E-14 | 3.67E-14 | 7.56E-14 | 1.25E-01 | 9.21E-01 | 2.90E-02 |
| 708.35894 | 274.95 | 16.29 | 19.59 | 19.84 | 19.21 | 3.16E-26 | 7.27E-14 | 5.12E-14 | 7.47E-14 | 8.81E-01 | 6.60E-01 | 2.40E-01 |
| 708.4339  | 52.52  | 12.60 | 14.39 | 14.49 | 12.50 | 9.52E-05 | 6.72E-03 | 3.20E-03 | 9.98E-01 | 9.98E-01 | 6.90E-03 | 3.45E-03 |
| 708.48379 | 42.59  | 12.59 | 11.40 | 11.17 | 12.43 | 5.05E-04 | 1.68E-02 | 2.24E-03 | 9.82E-01 | 9.41E-01 | 7.08E-02 | 1.46E-02 |
| 708.4971  | 45.42  | 14.90 | 16.44 | 16.28 | 15.84 | 4.10E-03 | 4.93E-03 | 1.43E-02 | 1.96E-01 | 9.85E-01 | 5.93E-01 | 7.95E-01 |
| 708.58206 | 47.21  | 16.12 | 17.51 | 17.37 | 17.67 | 9.05E-10 | 2.53E-07 | 3.39E-06 | 1.77E-08 | 9.43E-01 | 9.22E-01 | 6.37E-01 |
| 708.60662 | 276.18 | 14.13 | 19.18 | 19.44 | 18.55 | 2.85E-26 | 6.83E-14 | 5.36E-14 | 7.55E-14 | 9.51E-01 | 6.02E-01 | 2.90E-01 |
| 708.65715 | 276.98 | 16.09 | 15.17 | 14.44 | 15.61 | 1.44E-04 | 6.39E-02 | 5.58E-05 | 5.83E-01 | 2.10E-01 | 6.76E-01 | 1.42E-02 |
| 708.72314 | 273.14 | 14.24 | 14.66 | 15.21 | 14.87 | 1.15E-01 | 9.76E-01 | 7.50E-02 | 4.34E-01 | 5.33E-01 | 6.90E-01 | 8.47E-01 |
| 708.80578 | 277.33 | 15.32 | 15.41 | 15.43 | 15.89 | 5.23E-01 | 9.97E-01 | 9.93E-01 | 4.93E-01 | 1.00E+00 | 6.46E-01 | 6.76E-01 |
| 708.86632 | 276.34 | 15.87 | 17.94 | 18.14 | 18.26 | 3.75E-13 | 1.12E-08 | 2.45E-10 | 1.29E-10 | 9.32E-01 | 7.94E-01 | 9.86E-01 |
| 708.94707 | 277.98 | 16.29 | 15.25 | 15.57 | 15.75 | 1.19E-02 | 6.39E-03 | 1.03E-01 | 3.40E-01 | 7.53E-01 | 4.49E-01 | 9.53E-01 |
| 709.00095 | 52.91  | 14.94 | 17.30 | 17.81 | 15.85 | 2.27E-10 | 9.51E-07 | 1.44E-09 | 1.76E-01 | 6.69E-01 | 1.04E-02 | 1.70E-04 |
| 709.00932 | 275.42 | 14.23 | 14.56 | 15.01 | 15.30 | 2.72E-01 | 9.35E-01 | 5.00E-01 | 2.58E-01 | 8.64E-01 | 6.11E-01 | 9.64E-01 |
| 709.11172 | 273.04 | 15.27 | 14.47 | 15.46 | 15.20 | 1.90E-02 | 6.35E-02 | 9.33E-01 | 9.97E-01 | 1.52E-02 | 1.37E-01 | 8.73E-01 |
| 709.37015 | 279.85 | 15.57 | 14.77 | 15.03 | 15.27 | 1.28E-01 | 9.40E-02 | 3.97E-01 | 8.32E-01 | 8.73E-01 | 5.12E-01 | 9.14E-01 |
| 709.50592 | 279.27 | 15.21 | 18.90 | 18.87 | 18.32 | 4.22E-25 | 6.87E-14 | 6.92E-14 | 8.07E-14 | 1.00E+00 | 4.00E-01 | 4.51E-01 |
| 709.64812 | 279.74 | 16.82 | 24.36 | 24.28 | 23.10 | 1.80E-44 | 3.65E-14 | 3.65E-14 | 3.67E-14 | 9.98E-01 | 6.29E-02 | 8.82E-02 |
| 709.79138 | 279.86 | 17.42 | 25.70 | 25.64 | 24.31 | 2.58E-48 | 3.65E-14 | 3.65E-14 | 3.65E-14 | 1.00E+00 | 4.03E-02 | 5.03E-02 |
| 709.93428 | 281.67 | 17.84 | 26.00 | 25.91 | 24.65 | 1.57E-47 | 3.65E-14 | 3.65E-14 | 3.65E-14 | 9.98E-01 | 4.61E-02 | 6.76E-02 |
| 709.99726 | 52.79  | 15.97 | 17.42 | 15.93 | 16.53 | 2.30E-03 | 4.31E-03 | 1.00E+00 | 5.72E-01 | 4.23E-03 | 2.02E-01 | 5.37E-01 |
| 710.07702 | 280.21 | 17.75 | 26.07 | 26.04 | 24.70 | 7.97E-49 | 3.65E-14 | 3.65E-14 | 3.65E-14 | 1.00E+00 | 4.37E-02 | 4.83E-02 |
| 710.22071 | 279.75 | 17.46 | 25.64 | 25.58 | 24.31 | 2.65E-45 | 3.65E-14 | 3.65E-14 | 3.65E-14 | 9.99E-01 | 6.71E-02 | 8.61E-02 |
| 710.34975 | 44.08  | 19.11 | 13.00 | 13.52 | 14.58 | 6.78E-54 | 3.65E-14 | 3.65E-14 | 3.65E-14 | 3.77E-01 | 2.47E-05 | 8.73E-03 |
| 710.36372 | 280.13 | 17.88 | 24.92 | 24.89 | 23.61 | 8.56E-45 | 3.65E-14 | 3.65E-14 | 3.67E-14 | 1.00E+00 | 2.70E-02 | 3.11E-02 |
| 710.4489  | 55.74  | 15.80 | 16.36 | 14.47 | 15.18 | 3.74E-04 | 5.81E-01 | 1.34E-02 | 5.20E-01 | 2.29E-04 | 5.84E-02 | 4.13E-01 |
| 710.49795 | 45.78  | 13.04 | 12.54 | 12.15 | 12.79 | 3.35E-01 | 7.42E-01 | 2.73E-01 | 9.61E-01 | 8.73E-01 | 9.64E-01 | 6.14E-01 |
| 710.50647 | 280.3  | 16.56 | 23.94 | 23.90 | 22.73 | 4.71E-42 | 3.65E-14 | 3.65E-14 | 3.72E-14 | 1.00E+00 | 9.22E-02 | 1.05E-01 |

|           |        |       |       |       |       |          |          |          |          |          |          |          |
|-----------|--------|-------|-------|-------|-------|----------|----------|----------|----------|----------|----------|----------|
| 710.5775  | 49.11  | 15.97 | 18.66 | 18.13 | 18.66 | 1.50E-20 | 7.49E-14 | 4.49E-12 | 7.32E-14 | 2.71E-01 | 1.00E+00 | 2.88E-01 |
| 710.65027 | 285.26 | 16.65 | 20.98 | 21.78 | 20.27 | 5.67E-26 | 7.47E-14 | 4.16E-14 | 4.53E-13 | 2.89E-01 | 4.14E-01 | 6.45E-03 |
| 710.65172 | 43.62  | 11.51 | 15.64 | 14.83 | 16.70 | 3.19E-22 | 7.65E-14 | 1.03E-10 | 6.47E-14 | 3.32E-01 | 1.48E-01 | 1.10E-03 |
| 710.79341 | 279.12 | 16.92 | 21.64 | 21.65 | 20.29 | 5.08E-40 | 3.65E-14 | 3.65E-14 | 7.31E-14 | 1.00E+00 | 5.15E-04 | 3.97E-04 |
| 710.8775  | 274.51 | 15.49 | 14.02 | 13.83 | 15.01 | 2.67E-03 | 1.90E-02 | 5.36E-03 | 7.92E-01 | 9.84E-01 | 2.40E-01 | 1.13E-01 |
| 710.91446 | 53.66  | 16.10 | 14.55 | 15.14 | 13.79 | 4.79E-07 | 6.22E-04 | 6.67E-02 | 1.96E-07 | 4.66E-01 | 2.62E-01 | 6.89E-03 |
| 710.93718 | 279.52 | 16.42 | 20.03 | 19.98 | 19.35 | 5.34E-26 | 6.16E-14 | 6.41E-14 | 8.20E-14 | 9.99E-01 | 2.17E-01 | 2.72E-01 |
| 711.00291 | 52.66  | 14.98 | 18.52 | 18.36 | 17.30 | 1.09E-19 | 7.46E-14 | 7.39E-14 | 4.65E-08 | 9.75E-01 | 1.28E-02 | 3.84E-02 |
| 711.07719 | 277.73 | 16.67 | 18.21 | 18.19 | 17.59 | 2.39E-05 | 1.06E-04 | 1.07E-04 | 5.42E-02 | 1.00E+00 | 3.47E-01 | 3.62E-01 |
| 711.12762 | 269    | 13.22 | 16.07 | 15.91 | 15.36 | 1.17E-06 | 5.83E-06 | 1.86E-05 | 1.65E-03 | 9.91E-01 | 6.35E-01 | 7.98E-01 |
| 711.13898 | 262.15 | 15.24 | 12.76 | 12.65 | 14.07 | 1.87E-05 | 1.81E-04 | 7.18E-05 | 2.06E-01 | 9.98E-01 | 1.51E-01 | 9.97E-02 |
| 711.22481 | 277.23 | 15.90 | 15.20 | 15.50 | 15.78 | 1.14E-01 | 9.95E-02 | 5.37E-01 | 9.81E-01 | 7.75E-01 | 2.71E-01 | 8.08E-01 |
| 711.44632 | 52.33  | 12.05 | 12.48 | 10.97 | 12.06 | 1.04E-02 | 7.70E-01 | 7.65E-02 | 1.00E+00 | 6.56E-03 | 8.08E-01 | 1.01E-01 |
| 711.5024  | 53.01  | 13.36 | 13.21 | 12.79 | 12.78 | 2.56E-01 | 9.75E-01 | 3.55E-01 | 3.72E-01 | 6.38E-01 | 6.46E-01 | 1.00E+00 |
| 711.50317 | 274.33 | 15.41 | 15.28 | 15.54 | 15.33 | 9.01E-01 | 9.81E-01 | 9.83E-01 | 9.96E-01 | 8.88E-01 | 9.99E-01 | 9.43E-01 |
| 711.56898 | 52.95  | 14.65 | 15.53 | 13.20 | 16.60 | 1.43E-07 | 3.65E-01 | 3.88E-02 | 3.15E-03 | 2.38E-04 | 2.51E-01 | 6.12E-08 |
| 711.78514 | 47.92  | 12.00 | 13.88 | 13.50 | 14.25 | 2.06E-13 | 1.23E-09 | 1.33E-06 | 1.74E-12 | 5.39E-01 | 6.01E-01 | 5.40E-02 |
| 711.93295 | 280.08 | 16.00 | 15.64 | 15.95 | 15.73 | 5.16E-01 | 5.49E-01 | 9.97E-01 | 7.62E-01 | 6.91E-01 | 9.90E-01 | 8.69E-01 |
| 712.00209 | 52.65  | 13.11 | 17.30 | 17.05 | 15.97 | 1.18E-14 | 7.00E-13 | 8.32E-12 | 1.92E-06 | 9.64E-01 | 8.29E-02 | 2.14E-01 |
| 712.07563 | 280.09 | 13.61 | 18.33 | 17.55 | 17.33 | 1.09E-16 | 7.76E-14 | 1.58E-11 | 7.79E-10 | 4.89E-01 | 2.92E-01 | 9.79E-01 |
| 712.11229 | 261.99 | 13.82 | 18.10 | 18.20 | 17.12 | 8.87E-17 | 1.96E-13 | 9.63E-14 | 2.11E-08 | 9.98E-01 | 2.87E-01 | 1.99E-01 |
| 712.13435 | 266.64 | 15.20 | 13.38 | 14.21 | 14.71 | 1.08E-03 | 4.96E-04 | 1.31E-01 | 7.19E-01 | 2.79E-01 | 3.16E-02 | 7.31E-01 |
| 712.219   | 281.12 | 16.56 | 19.30 | 19.08 | 18.67 | 1.10E-13 | 4.91E-12 | 1.13E-10 | 2.26E-07 | 9.39E-01 | 3.50E-01 | 6.86E-01 |
| 712.34617 | 44     | 18.23 | 10.36 | 9.45  | 11.98 | 3.96E-36 | 3.67E-14 | 3.65E-14 | 7.28E-14 | 4.68E-01 | 6.29E-02 | 6.38E-04 |
| 712.3619  | 281.29 | 16.84 | 19.28 | 19.11 | 18.55 | 1.83E-13 | 6.16E-12 | 9.45E-11 | 2.99E-06 | 9.56E-01 | 1.48E-01 | 3.54E-01 |
| 712.44196 | 50.35  | 16.02 | 15.00 | 14.68 | 15.18 | 1.81E-03 | 2.40E-02 | 1.09E-03 | 1.00E-01 | 8.16E-01 | 9.66E-01 | 5.46E-01 |
| 712.50566 | 280.42 | 14.72 | 17.75 | 17.04 | 16.86 | 3.77E-10 | 4.64E-10 | 1.68E-06 | 2.67E-05 | 4.08E-01 | 2.31E-01 | 9.78E-01 |
| 712.52377 | 45.23  | 12.67 | 11.89 | 12.18 | 12.89 | 8.93E-02 | 2.34E-01 | 6.17E-01 | 9.55E-01 | 9.07E-01 | 1.04E-01 | 3.51E-01 |
| 712.57704 | 47.2   | 14.17 | 13.85 | 13.62 | 13.84 | 4.71E-01 | 7.96E-01 | 3.86E-01 | 7.89E-01 | 9.18E-01 | 1.00E+00 | 9.35E-01 |
| 712.64951 | 280.32 | 15.98 | 16.05 | 16.10 | 16.05 | 9.82E-01 | 9.95E-01 | 9.76E-01 | 9.95E-01 | 9.98E-01 | 1.00E+00 | 9.99E-01 |
| 712.66974 | 48.07  | 11.11 | 15.27 | 14.96 | 16.30 | 5.62E-19 | 1.11E-12 | 2.46E-11 | 7.54E-14 | 9.40E-01 | 2.62E-01 | 7.92E-02 |
| 712.79376 | 281.95 | 16.34 | 15.88 | 15.79 | 15.98 | 2.95E-01 | 4.33E-01 | 2.76E-01 | 6.56E-01 | 9.93E-01 | 9.90E-01 | 9.41E-01 |
| 712.94621 | 282.07 | 15.75 | 14.68 | 14.18 | 15.85 | 7.15E-03 | 2.11E-01 | 2.21E-02 | 9.98E-01 | 8.11E-01 | 1.86E-01 | 2.13E-02 |
| 712.99247 | 280.41 | 15.68 | 15.14 | 13.19 | 15.31 | 5.27E-04 | 8.27E-01 | 4.55E-04 | 9.41E-01 | 1.34E-02 | 9.94E-01 | 7.54E-03 |
| 713.04696 | 279.66 | 16.51 | 15.03 | 14.70 | 15.53 | 2.77E-04 | 4.27E-03 | 2.21E-04 | 1.28E-01 | 8.82E-01 | 6.93E-01 | 2.65E-01 |
| 713.06241 | 52.4   | 9.65  | 11.53 | 11.16 | 11.53 | 6.61E-05 | 2.89E-04 | 5.33E-03 | 4.36E-04 | 8.51E-01 | 1.00E+00 | 8.60E-01 |
| 713.11706 | 250.66 | 11.56 | 14.86 | 14.30 | 13.77 | 1.54E-08 | 2.72E-08 | 4.02E-06 | 5.27E-04 | 7.42E-01 | 2.30E-01 | 7.88E-01 |
| 713.13892 | 275.08 | 16.75 | 15.04 | 15.49 | 15.92 | 3.09E-04 | 1.70E-04 | 9.07E-03 | 1.83E-01 | 6.95E-01 | 1.66E-01 | 7.36E-01 |
| 713.20676 | 270.96 | 15.15 | 14.38 | 14.67 | 15.30 | 8.46E-03 | 3.67E-02 | 3.21E-01 | 9.63E-01 | 7.56E-01 | 1.47E-02 | 1.61E-01 |
| 713.2286  | 274.41 | 16.34 | 14.92 | 15.25 | 15.57 | 8.65E-04 | 5.67E-04 | 1.19E-02 | 1.60E-01 | 8.14E-01 | 3.15E-01 | 8.18E-01 |
| 713.3612  | 276.07 | 16.15 | 14.29 | 14.47 | 14.85 | 1.02E-09 | 7.15E-09 | 1.34E-07 | 1.26E-04 | 9.35E-01 | 2.81E-01 | 6.08E-01 |
| 713.37506 | 270.32 | 16.32 | 15.18 | 15.20 | 15.76 | 8.58E-03 | 1.64E-02 | 1.74E-02 | 4.80E-01 | 1.00E+00 | 4.80E-01 | 5.01E-01 |
| 713.4521  | 53.15  | 14.05 | 13.32 | 11.71 | 13.51 | 1.22E-14 | 3.67E-02 | 8.00E-14 | 2.16E-01 | 1.67E-07 | 9.05E-01 | 9.29E-09 |
| 713.47557 | 275.13 | 16.57 | 14.38 | 15.02 | 15.27 | 3.26E-05 | 1.35E-05 | 3.62E-03 | 2.78E-02 | 5.03E-01 | 2.46E-01 | 9.54E-01 |
| 713.50448 | 273.9  | 15.61 | 14.78 | 14.92 | 14.81 | 3.16E-02 | 4.85E-02 | 1.29E-01 | 7.22E-02 | 9.75E-01 | 1.00E+00 | 9.89E-01 |
| 713.56562 | 279.5  | 16.84 | 15.09 | 15.02 | 15.92 | 6.69E-05 | 4.37E-04 | 1.87E-04 | 1.68E-01 | 9.98E-01 | 2.72E-01 | 1.96E-01 |
| 713.61378 | 281.79 | 16.69 | 15.31 | 14.79 | 15.84 | 8.64E-04 | 2.22E-02 | 4.57E-04 | 3.10E-01 | 7.06E-01 | 7.23E-01 | 1.56E-01 |
| 713.64652 | 272.96 | 15.76 | 14.52 | 15.31 | 14.94 | 3.60E-04 | 1.71E-04 | 4.02E-01 | 3.23E-02 | 4.21E-02 | 5.25E-01 | 6.17E-01 |
| 713.66179 | 282.16 | 16.55 | 15.12 | 15.08 | 16.00 | 7.12E-03 | 2.11E-02 | 1.49E-02 | 7.04E-01 | 1.00E+00 | 3.27E-01 | 2.78E-01 |
| 713.66203 | 41.37  | 10.95 | 11.34 | 11.18 | 12.06 | 2.98E-01 | 9.08E-01 | 9.80E-01 | 2.42E-01 | 9.92E-01 | 6.39E-01 | 4.58E-01 |
| 713.70937 | 279.82 | 16.96 | 15.12 | 14.95 | 15.86 | 2.14E-05 | 2.57E-04 | 4.25E-05 | 7.63E-02 | 9.82E-01 | 3.86E-01 | 2.02E-01 |
| 713.77638 | 46.75  | 10.09 | 12.58 | 12.34 | 12.83 | 5.19E-13 | 8.82E-10 | 2.34E-08 | 4.98E-11 | 9.21E-01 | 9.17E-01 | 5.83E-01 |
| 713.78472 | 49.25  | 11.46 | 14.42 | 14.08 | 13.94 | 2.61E-28 | 3.94E-14 | 6.65E-14 | 7.25E-14 | 5.58E-01 | 2.66E-01 | 9.43E-01 |
| 713.78972 | 275.16 | 15.81 | 15.33 | 15.57 | 15.43 | 3.57E-01 | 3.21E-01 | 8.14E-01 | 5.39E-01 | 8.47E-01 | 9.89E-01 | 9.64E-01 |
| 713.88656 | 54.06  | 16.40 | 14.85 | 13.44 | 14.39 | 9.47E-14 | 9.69E-05 | 9.34E-14 | 4.56E-07 | 6.66E-04 | 6.07E-01 | 5.04E-02 |
| 713.93721 | 275.76 | 15.76 | 14.68 | 14.95 | 14.73 | 3.29E-03 | 5.76E-03 | 5.89E-02 | 1.16E-02 | 8.54E-01 | 9.99E-01 | 9.15E-01 |
| 714.00771 | 53.18  | 18.61 | 21.01 | 20.53 | 19.53 | 1.29E-17 | 7.41E-14 | 1.29E-11 | 3.71E-03 | 2.72E-01 | 1.18E-06 | 1.84E-03 |
| 714.19036 | 280.23 | 16.47 | 15.07 | 15.72 | 16.22 | 1.90E-02 | 1.44E-02 | 3.55E-01 | 9.54E-01 | 5.22E-01 | 8.85E-02 | 7.24E-01 |
| 714.23149 | 279.89 | 17.06 | 15.14 | 15.89 | 15.90 | 7.95E-04 | 2.75E-04 | 5.61E-02 | 7.15E-02 | 3.85E-01 | 4.10E-01 | 1.00E+00 |
| 714.28111 | 283.51 | 17.02 | 15.66 | 15.19 | 16.54 | 8.18E-04 | 2.62E-02 | 8.96E-04 | 7.63E-01 | 7.72E-01 | 3.14E-01 | 3.99E-02 |
| 714.30365 | 265.79 | 12.74 | 13.94 | 14.11 | 13.30 | 1.92E-02 | 6.11E-02 | 2.23E-02 | 6.64E-01 | 9.87E-01 | 5.87E-01 | 3.79E-01 |
| 714.32421 | 277.75 | 16.93 | 14.66 | 15.00 | 15.37 | 1.49E-04 | 1.80E-04 | 1.85E-03 | 2.51E-02 | 9.24E-01 | 5.87E-01 | 9.10E-01 |
| 714.3402  | 42.56  | 17.47 | 8.68  | 8.62  | 10.44 | 6.57E-41 | 3.65E-14 | 3.65E-14 | 4.47E-14 | 1.00E+00 | 2.73E-02 | 1.97E-02 |
| 714.38481 | 275.27 | 15.78 | 17.87 | 16.97 | 17.42 | 4.73E-03 | 3.24E-03 | 1.87E-01 | 3.93E-02 | 4.61E-01 | 8.98E-01 | 8.88E-01 |
| 714.39915 | 264.38 | 12.03 | 14.89 | 15.68 | 13.95 | 1.38E-14 | 1.82E-09 | 9.27E-14 | 1.41E-04 | 2.82E-01 | 1.73E-01 | 1.03E-03 |
| 714.4248  | 282.19 | 16.95 | 15.77 | 14.58 | 16.41 | 2.91E-05 | 8.18E-02 | 1.29E-05 | 7.11E-01 | 8.57E-02 | 6.12E-01 | 2.65E-03 |
| 714.44198 | 49.83  | 15.66 | 16.19 | 14.04 | 16.17 | 9.47E-05 | 7.16E-01 | 7.87E-03 | 7.51E-01 | 2.75E-04 | 1.00E+00 | 4.65E-04 |
| 714.47342 | 278.15 | 16.97 | 17.89 | 18.33 | 17.97 | 1.45E-02 | 1.48E-01 | 9.23E-03 | 1.16E-01 | 7.53E-01 | 9.98E-01 | 8.52E-01 |

|           |        |       |       |       |       |          |          |          |          |          |          |          |
|-----------|--------|-------|-------|-------|-------|----------|----------|----------|----------|----------|----------|----------|
| 714.50689 | 47.64  | 15.09 | 12.94 | 11.96 | 12.90 | 1.37E-13 | 3.18E-07 | 1.45E-13 | 3.72E-07 | 6.04E-02 | 1.00E+00 | 9.17E-02 |
| 714.52034 | 278.57 | 15.48 | 15.42 | 15.40 | 15.49 | 9.99E-01 | 1.00E+00 | 9.99E-01 | 1.00E+00 | 1.00E+00 | 1.00E+00 | 9.99E-01 |
| 714.52409 | 46.35  | 16.37 | 17.70 | 17.22 | 17.82 | 3.67E-08 | 1.33E-06 | 3.69E-03 | 2.51E-07 | 2.39E-01 | 9.68E-01 | 1.02E-01 |
| 714.53507 | 47.4   | 13.91 | 12.08 | 12.00 | 13.04 | 1.23E-11 | 3.02E-09 | 4.30E-10 | 1.48E-02 | 9.93E-01 | 8.04E-03 | 3.02E-03 |
| 714.55964 | 277.64 | 17.21 | 18.48 | 18.89 | 18.38 | 3.40E-04 | 9.75E-03 | 2.19E-04 | 2.70E-02 | 7.57E-01 | 9.94E-01 | 6.17E-01 |
| 714.56593 | 38.44  | 11.19 | 13.24 | 12.86 | 14.20 | 9.15E-08 | 1.90E-04 | 3.33E-03 | 3.33E-08 | 8.67E-01 | 2.41E-01 | 4.31E-02 |
| 714.64499 | 277.25 | 17.21 | 18.61 | 19.05 | 18.55 | 2.90E-05 | 2.39E-03 | 2.14E-05 | 5.36E-03 | 6.88E-01 | 9.99E-01 | 6.17E-01 |
| 714.65843 | 46.61  | 12.60 | 14.26 | 13.72 | 14.80 | 6.82E-05 | 2.74E-03 | 7.57E-02 | 4.65E-05 | 6.83E-01 | 6.94E-01 | 1.30E-01 |
| 714.67081 | 49.37  | 10.06 | 10.61 | 10.54 | 11.99 | 3.79E-04 | 5.92E-01 | 6.87E-01 | 1.54E-04 | 9.99E-01 | 1.70E-02 | 9.84E-03 |
| 714.72622 | 277.16 | 17.02 | 18.71 | 19.05 | 18.28 | 1.80E-06 | 1.19E-04 | 1.88E-06 | 9.81E-03 | 8.30E-01 | 7.18E-01 | 2.34E-01 |
| 714.80749 | 276.79 | 16.84 | 18.38 | 18.86 | 18.26 | 4.33E-06 | 7.13E-04 | 3.02E-06 | 2.95E-03 | 6.33E-01 | 9.92E-01 | 4.73E-01 |
| 714.88686 | 51.73  | 15.22 | 15.33 | 14.65 | 15.04 | 2.62E-01 | 9.89E-01 | 3.69E-01 | 9.65E-01 | 2.40E-01 | 8.73E-01 | 7.09E-01 |
| 714.89059 | 275.24 | 17.03 | 17.87 | 18.44 | 17.82 | 4.07E-03 | 1.30E-01 | 1.50E-03 | 1.84E-01 | 4.70E-01 | 1.00E+00 | 4.25E-01 |
| 714.97353 | 267.27 | 14.47 | 17.03 | 16.64 | 17.16 | 1.98E-07 | 4.88E-06 | 1.33E-04 | 2.95E-06 | 8.69E-01 | 9.96E-01 | 7.61E-01 |
| 715.00768 | 274.29 | 14.28 | 14.79 | 14.46 | 15.26 | 4.44E-01 | 8.40E-01 | 9.91E-01 | 4.04E-01 | 9.52E-01 | 8.86E-01 | 5.97E-01 |
| 715.00854 | 52.76  | 15.30 | 18.28 | 17.50 | 16.95 | 3.62E-10 | 1.95E-10 | 2.36E-06 | 1.16E-03 | 2.93E-01 | 1.90E-02 | 6.02E-01 |
| 715.06892 | 278.48 | 16.07 | 18.71 | 18.66 | 18.22 | 4.53E-23 | 7.49E-14 | 7.55E-14 | 4.86E-13 | 9.97E-01 | 2.81E-01 | 3.73E-01 |
| 715.14303 | 266.03 | 17.07 | 16.02 | 16.17 | 16.35 | 1.29E-02 | 1.33E-02 | 4.22E-02 | 1.70E-01 | 9.75E-01 | 8.10E-01 | 9.61E-01 |
| 715.21216 | 278.8  | 15.17 | 20.05 | 20.06 | 19.22 | 5.32E-51 | 3.65E-14 | 3.65E-14 | 3.65E-14 | 1.00E+00 | 2.77E-02 | 2.19E-02 |
| 715.23022 | 266.99 | 15.67 | 13.97 | 14.28 | 14.37 | 4.91E-04 | 5.68E-04 | 6.54E-03 | 1.81E-02 | 8.98E-01 | 8.14E-01 | 9.97E-01 |
| 715.35602 | 277.69 | 15.94 | 20.28 | 20.53 | 19.39 | 3.33E-49 | 3.65E-14 | 3.65E-14 | 3.65E-14 | 7.95E-01 | 7.12E-03 | 2.46E-04 |
| 715.49854 | 277.47 | 16.11 | 20.35 | 20.52 | 19.51 | 1.05E-43 | 3.65E-14 | 3.65E-14 | 3.87E-14 | 9.36E-01 | 2.25E-02 | 3.39E-03 |
| 715.64196 | 277.21 | 15.68 | 19.89 | 19.97 | 18.98 | 1.52E-38 | 3.65E-14 | 3.65E-14 | 6.56E-14 | 9.93E-01 | 2.24E-02 | 9.24E-03 |
| 715.78244 | 50.32  | 10.20 | 13.27 | 13.24 | 13.35 | 1.12E-13 | 2.42E-10 | 2.50E-10 | 2.41E-10 | 1.00E+00 | 9.98E-01 | 9.95E-01 |
| 715.78435 | 277.3  | 16.46 | 18.71 | 18.71 | 18.26 | 1.27E-15 | 7.77E-13 | 5.43E-13 | 1.93E-08 | 1.00E+00 | 4.41E-01 | 4.39E-01 |
| 715.93194 | 278.86 | 16.10 | 17.37 | 17.65 | 17.19 | 4.63E-10 | 6.91E-07 | 8.60E-10 | 4.62E-05 | 6.53E-01 | 8.82E-01 | 2.42E-01 |
| 716.001   | 53.12  | 16.42 | 18.31 | 17.84 | 17.10 | 4.23E-09 | 5.80E-09 | 1.36E-05 | 1.15E-01 | 4.12E-01 | 8.46E-04 | 8.26E-02 |
| 716.06675 | 278.78 | 15.66 | 15.08 | 15.16 | 15.63 | 1.25E-01 | 2.17E-01 | 3.37E-01 | 1.00E+00 | 9.94E-01 | 3.08E-01 | 4.44E-01 |
| 716.14097 | 76.23  | 8.94  | 11.74 | 8.93  | 11.24 | 5.93E-07 | 3.51E-05 | 1.00E+00 | 1.46E-03 | 5.42E-05 | 8.62E-01 | 1.91E-03 |
| 716.38323 | 44.89  | 17.52 | 12.48 | 11.78 | 13.43 | 9.31E-24 | 7.44E-14 | 5.96E-14 | 6.61E-12 | 5.74E-01 | 3.24E-01 | 1.73E-02 |
| 716.51033 | 44.64  | 10.06 | 10.54 | 10.43 | 11.39 | 9.05E-02 | 7.82E-01 | 8.88E-01 | 5.57E-02 | 9.96E-01 | 3.93E-01 | 2.72E-01 |
| 716.55888 | 27.71  | 19.13 | 16.98 | 17.28 | 17.80 | 1.87E-26 | 4.05E-14 | 7.29E-14 | 8.19E-11 | 3.64E-01 | 1.59E-04 | 3.41E-02 |
| 716.61683 | 47.46  | 11.66 | 14.56 | 13.79 | 15.25 | 3.65E-12 | 1.66E-08 | 4.66E-05 | 1.09E-11 | 3.67E-01 | 5.06E-01 | 1.63E-02 |
| 716.85658 | 51.51  | 15.63 | 14.18 | 14.75 | 12.80 | 7.52E-07 | 1.48E-02 | 2.53E-01 | 1.75E-07 | 6.52E-01 | 3.52E-02 | 8.04E-04 |
| 717.11552 | 146.98 | 7.94  | 11.17 | 10.02 | 9.62  | 5.54E-06 | 1.40E-06 | 3.49E-03 | 3.64E-02 | 2.50E-01 | 7.72E-02 | 9.24E-01 |
| 717.52522 | 25.52  | 17.79 | 12.39 | 13.33 | 14.63 | 1.44E-26 | 3.87E-14 | 7.36E-14 | 3.51E-10 | 1.79E-01 | 2.57E-05 | 3.09E-02 |
| 717.56186 | 25.46  | 17.72 | 12.17 | 13.13 | 14.49 | 3.83E-34 | 3.65E-14 | 3.94E-14 | 2.85E-13 | 7.88E-02 | 3.08E-07 | 5.38E-03 |
| 717.6093  | 260.95 | 14.16 | 13.44 | 13.99 | 14.18 | 3.00E-01 | 3.23E-01 | 9.77E-01 | 1.00E+00 | 5.84E-01 | 3.49E-01 | 9.72E-01 |
| 717.62091 | 221.02 | 6.73  | 12.06 | 12.82 | 11.98 | 9.76E-58 | 3.65E-14 | 3.65E-14 | 3.65E-14 | 6.66E-02 | 9.94E-01 | 4.03E-02 |
| 717.85893 | 52.93  | 13.32 | 10.35 | 11.63 | 10.13 | 5.08E-08 | 1.53E-06 | 1.32E-02 | 4.27E-07 | 1.17E-01 | 9.81E-01 | 5.32E-02 |
| 717.8623  | 262.91 | 16.24 | 14.58 | 15.76 | 15.18 | 1.14E-05 | 6.47E-06 | 4.59E-01 | 1.10E-02 | 3.39E-03 | 3.19E-01 | 3.46E-01 |
| 718.11772 | 249.86 | 15.51 | 13.38 | 15.13 | 14.49 | 2.28E-09 | 1.82E-09 | 6.35E-01 | 1.20E-02 | 1.72E-06 | 7.55E-03 | 2.31E-01 |
| 718.37359 | 238.9  | 12.58 | 11.48 | 13.10 | 12.91 | 4.91E-02 | 2.61E-01 | 8.16E-01 | 9.48E-01 | 4.38E-02 | 1.12E-01 | 9.91E-01 |
| 718.38151 | 45.72  | 17.79 | 13.62 | 13.53 | 14.11 | 2.15E-27 | 6.03E-14 | 5.07E-14 | 7.49E-14 | 9.96E-01 | 6.06E-01 | 4.62E-01 |
| 718.43683 | 52.25  | 12.20 | 12.62 | 12.19 | 12.09 | 6.30E-01 | 7.46E-01 | 1.00E+00 | 9.94E-01 | 7.47E-01 | 6.26E-01 | 9.96E-01 |
| 718.46537 | 78.29  | 8.51  | 12.17 | 9.91  | 10.50 | 1.34E-07 | 2.14E-08 | 8.28E-02 | 6.93E-03 | 1.56E-03 | 4.31E-02 | 7.84E-01 |
| 718.51716 | 46.02  | 9.35  | 13.01 | 12.90 | 12.98 | 7.23E-11 | 1.62E-08 | 3.25E-08 | 5.11E-08 | 9.98E-01 | 1.00E+00 | 9.99E-01 |
| 718.56918 | 35.58  | 20.49 | 18.47 | 18.29 | 19.30 | 3.12E-30 | 4.45E-14 | 3.67E-14 | 1.37E-09 | 7.62E-01 | 7.11E-05 | 7.26E-07 |
| 718.61322 | 47.39  | 11.76 | 16.98 | 16.39 | 16.71 | 7.53E-22 | 7.59E-14 | 7.70E-14 | 7.36E-14 | 7.12E-01 | 9.66E-01 | 9.41E-01 |
| 718.84787 | 51.64  | 14.55 | 11.73 | 11.86 | 11.38 | 2.87E-15 | 4.68E-11 | 2.20E-10 | 8.12E-13 | 9.89E-01 | 8.36E-01 | 6.54E-01 |
| 718.88401 | 38.84  | 9.85  | 12.88 | 10.79 | 11.33 | 9.09E-06 | 2.30E-06 | 3.63E-01 | 6.53E-02 | 2.81E-03 | 5.72E-02 | 8.11E-01 |
| 718.99062 | 52.9   | 13.61 | 17.07 | 17.40 | 14.84 | 3.07E-16 | 1.07E-11 | 1.54E-13 | 4.93E-02 | 8.98E-01 | 5.31E-05 | 1.98E-06 |
| 719.08329 | 199.55 | 7.27  | 12.49 | 12.83 | 11.60 | 1.09E-27 | 6.10E-14 | 4.19E-14 | 7.65E-14 | 8.98E-01 | 2.92E-01 | 6.91E-02 |
| 719.09101 | 197.48 | 6.45  | 10.71 | 11.41 | 9.70  | 9.03E-23 | 7.47E-14 | 6.36E-14 | 4.32E-10 | 4.47E-01 | 1.72E-01 | 2.92E-03 |
| 719.24222 | 285.38 | 15.59 | 14.77 | 14.77 | 15.16 | 1.28E-01 | 1.69E-01 | 1.62E-01 | 7.13E-01 | 1.00E+00 | 7.94E-01 | 7.91E-01 |
| 719.3663  | 283.38 | 16.34 | 15.20 | 15.45 | 15.64 | 2.95E-03 | 2.05E-03 | 2.53E-02 | 1.38E-01 | 8.60E-01 | 5.47E-01 | 9.41E-01 |
| 719.43279 | 52.17  | 13.38 | 12.44 | 12.80 | 12.60 | 4.02E-02 | 3.36E-02 | 3.17E-01 | 1.26E-01 | 7.42E-01 | 9.69E-01 | 9.51E-01 |
| 719.48916 | 285.1  | 11.98 | 14.96 | 14.19 | 13.27 | 4.50E-04 | 2.81E-04 | 1.19E-02 | 3.04E-01 | 7.17E-01 | 1.19E-01 | 6.18E-01 |
| 719.49062 | 52.64  | 10.88 | 12.15 | 13.07 | 11.55 | 8.94E-04 | 9.28E-02 | 3.91E-04 | 6.26E-01 | 3.55E-01 | 7.25E-01 | 4.19E-02 |
| 719.54613 | 35.48  | 19.07 | 16.32 | 17.13 | 18.15 | 1.99E-20 | 7.24E-14 | 1.78E-11 | 4.70E-03 | 1.72E-02 | 2.95E-09 | 1.73E-03 |
| 719.57735 | 25.55  | 18.90 | 14.02 | 14.93 | 15.92 | 1.68E-27 | 3.72E-14 | 7.25E-14 | 1.83E-11 | 1.13E-01 | 5.38E-05 | 8.27E-02 |
| 719.98985 | 52.95  | 12.86 | 13.71 | 13.98 | 13.11 | 1.86E-02 | 1.33E-01 | 2.16E-02 | 9.25E-01 | 9.07E-01 | 4.68E-01 | 1.49E-01 |
| 720.37703 | 274.75 | 14.44 | 15.11 | 15.45 | 15.65 | 8.05E-02 | 5.17E-01 | 1.61E-01 | 7.82E-02 | 9.07E-01 | 7.27E-01 | 9.80E-01 |
| 720.37945 | 44.94  | 18.08 | 13.46 | 11.85 | 14.23 | 1.75E-25 | 7.63E-14 | 3.83E-14 | 4.37E-11 | 1.41E-02 | 5.02E-01 | 1.10E-04 |
| 720.47595 | 48.77  | 14.82 | 15.46 | 15.25 | 14.94 | 5.71E-01 | 5.62E-01 | 8.05E-01 | 9.94E-01 | 9.78E-01 | 7.58E-01 | 9.32E-01 |
| 720.5226  | 46.57  | 10.45 | 11.84 | 9.88  | 10.76 | 3.01E-02 | 1.38E-01 | 8.08E-01 | 9.67E-01 | 1.71E-02 | 3.86E-01 | 5.66E-01 |
| 720.55382 | 31.56  | 19.07 | 15.45 | 15.48 | 17.12 | 6.65E-37 | 3.65E-14 | 3.65E-14 | 2.72E-11 | 9.99E-01 | 3.02E-08 | 4.46E-08 |
| 720.59674 | 38.7   | 14.11 | 11.78 | 11.69 | 12.27 | 6.29E-06 | 6.63E-05 | 2.55E-05 | 3.76E-03 | 9.98E-01 | 8.03E-01 | 7.04E-01 |

|           |        |       |       |       |       |          |          |          |          |          |          |          |
|-----------|--------|-------|-------|-------|-------|----------|----------|----------|----------|----------|----------|----------|
| 720.61201 | 47.69  | 12.47 | 16.22 | 15.97 | 16.47 | 3.46E-24 | 7.52E-14 | 7.39E-14 | 7.43E-14 | 9.25E-01 | 9.21E-01 | 5.99E-01 |
| 720.70055 | 49.38  | 10.21 | 10.55 | 10.71 | 11.64 | 2.76E-02 | 8.82E-01 | 6.98E-01 | 1.54E-02 | 9.87E-01 | 1.21E-01 | 2.24E-01 |
| 721.05926 | 65.17  | 9.68  | 11.70 | 11.08 | 11.42 | 2.06E-02 | 2.02E-02 | 1.74E-01 | 7.13E-02 | 8.22E-01 | 9.81E-01 | 9.68E-01 |
| 721.09002 | 65.47  | 13.66 | 11.01 | 13.72 | 10.95 | 1.57E-08 | 2.71E-05 | 9.99E-01 | 2.90E-05 | 2.71E-05 | 1.00E+00 | 2.86E-05 |
| 721.21648 | 285.63 | 14.93 | 15.05 | 15.26 | 15.27 | 6.99E-01 | 9.83E-01 | 7.50E-01 | 7.54E-01 | 9.29E-01 | 9.27E-01 | 1.00E+00 |
| 721.26712 | 263.47 | 15.96 | 14.21 | 15.33 | 14.52 | 1.36E-07 | 3.19E-07 | 1.72E-01 | 5.76E-05 | 2.97E-03 | 7.87E-01 | 6.45E-02 |
| 721.37687 | 267.74 | 15.22 | 13.99 | 14.79 | 14.70 | 2.35E-02 | 1.08E-02 | 6.87E-01 | 5.64E-01 | 1.97E-01 | 3.30E-01 | 9.96E-01 |
| 721.39327 | 64.26  | 10.45 | 11.51 | 11.05 | 11.42 | 3.25E-01 | 3.28E-01 | 7.66E-01 | 4.32E-01 | 8.90E-01 | 9.99E-01 | 9.43E-01 |
| 721.4412  | 52.93  | 13.64 | 16.99 | 15.45 | 15.46 | 5.54E-08 | 6.82E-09 | 3.45E-03 | 4.99E-03 | 2.44E-02 | 3.28E-02 | 1.00E+00 |
| 721.46992 | 263.82 | 12.73 | 15.02 | 15.44 | 14.40 | 2.43E-04 | 2.98E-03 | 2.29E-04 | 6.34E-02 | 9.23E-01 | 8.05E-01 | 4.28E-01 |
| 721.55979 | 44.87  | 17.95 | 17.11 | 15.75 | 17.34 | 2.49E-09 | 5.40E-02 | 5.33E-10 | 2.71E-01 | 3.47E-04 | 9.11E-01 | 3.24E-05 |
| 721.56775 | 263.79 | 15.24 | 14.97 | 15.26 | 14.46 | 3.61E-01 | 9.42E-01 | 1.00E+00 | 3.89E-01 | 9.30E-01 | 7.48E-01 | 3.79E-01 |
| 721.6727  | 261.89 | 15.84 | 13.86 | 14.58 | 14.56 | 3.80E-09 | 9.76E-10 | 1.44E-04 | 2.04E-04 | 8.37E-02 | 1.16E-01 | 1.00E+00 |
| 721.99472 | 53.01  | 13.98 | 18.50 | 18.13 | 17.15 | 6.88E-15 | 3.33E-13 | 1.07E-11 | 6.07E-07 | 9.14E-01 | 1.03E-01 | 3.41E-01 |
| 722.06054 | 54.2   | 10.12 | 12.54 | 10.56 | 13.05 | 8.83E-07 | 3.45E-04 | 8.73E-01 | 1.47E-05 | 6.95E-03 | 8.45E-01 | 4.78E-04 |
| 722.37569 | 44.87  | 17.23 | 12.62 | 12.02 | 12.54 | 3.12E-26 | 7.54E-14 | 5.23E-14 | 7.55E-14 | 5.86E-01 | 9.98E-01 | 7.11E-01 |
| 722.43703 | 52.69  | 14.51 | 15.24 | 14.13 | 14.67 | 1.45E-02 | 1.26E-01 | 6.51E-01 | 9.68E-01 | 6.72E-03 | 3.60E-01 | 4.14E-01 |
| 722.50466 | 35.51  | 19.05 | 16.97 | 16.96 | 17.23 | 2.46E-21 | 7.45E-14 | 7.49E-14 | 4.88E-13 | 1.00E+00 | 6.69E-01 | 6.34E-01 |
| 722.51882 | 24.71  | 16.22 | 13.54 | 13.02 | 14.01 | 1.77E-12 | 9.86E-09 | 5.61E-12 | 5.71E-06 | 6.34E-01 | 7.16E-01 | 1.19E-01 |
| 722.55922 | 51.01  | 13.75 | 15.91 | 15.05 | 15.80 | 2.92E-06 | 9.14E-06 | 1.58E-02 | 4.87E-05 | 2.22E-01 | 9.95E-01 | 3.63E-01 |
| 722.70139 | 49.18  | 11.46 | 10.98 | 11.49 | 12.58 | 7.35E-03 | 7.01E-01 | 1.00E+00 | 6.11E-02 | 6.65E-01 | 3.67E-03 | 8.58E-02 |
| 722.87108 | 51.65  | 13.21 | 12.55 | 13.02 | 12.53 | 5.44E-02 | 1.11E-01 | 9.08E-01 | 1.05E-01 | 4.06E-01 | 1.00E+00 | 3.81E-01 |
| 722.99543 | 53.19  | 14.59 | 17.16 | 16.80 | 16.22 | 4.40E-13 | 2.69E-12 | 1.06E-09 | 2.10E-05 | 7.20E-01 | 4.07E-02 | 3.45E-01 |
| 723.48957 | 52.7   | 12.34 | 10.95 | 11.09 | 11.73 | 8.42E-04 | 1.43E-03 | 4.77E-03 | 3.79E-01 | 9.83E-01 | 2.06E-01 | 3.70E-01 |
| 723.51331 | 26.58  | 17.61 | 11.54 | 12.31 | 13.54 | 3.77E-36 | 3.65E-14 | 3.67E-14 | 7.25E-14 | 2.74E-01 | 5.27E-05 | 2.63E-02 |
| 723.64116 | 278.59 | 14.93 | 15.34 | 15.23 | 15.65 | 1.43E-01 | 5.27E-01 | 7.41E-01 | 9.17E-02 | 9.86E-01 | 7.57E-01 | 5.44E-01 |
| 723.78979 | 279.17 | 16.29 | 18.13 | 18.14 | 17.14 | 7.26E-11 | 6.89E-09 | 3.46E-09 | 2.38E-02 | 1.00E+00 | 7.65E-03 | 5.74E-03 |
| 723.93014 | 278.93 | 15.62 | 19.39 | 19.31 | 17.60 | 1.49E-29 | 3.87E-14 | 4.05E-14 | 2.27E-08 | 9.94E-01 | 1.05E-06 | 2.82E-06 |
| 723.97427 | 52.92  | 17.58 | 16.25 | 17.31 | 15.46 | 1.16E-07 | 2.28E-03 | 8.82E-01 | 4.50E-07 | 2.88E-02 | 1.90E-01 | 2.21E-05 |
| 723.99382 | 52.81  | 10.73 | 11.19 | 10.78 | 12.81 | 1.45E-04 | 7.84E-01 | 1.00E+00 | 2.40E-04 | 8.46E-01 | 9.35E-03 | 5.08E-04 |
| 724.075   | 278.97 | 16.00 | 18.95 | 18.85 | 17.66 | 4.55E-24 | 7.03E-14 | 7.03E-14 | 1.42E-07 | 9.84E-01 | 9.96E-05 | 3.61E-04 |
| 724.21881 | 279.09 | 14.88 | 18.40 | 18.30 | 17.43 | 2.28E-24 | 6.85E-14 | 7.16E-14 | 9.21E-12 | 9.92E-01 | 3.14E-02 | 6.10E-02 |
| 724.36396 | 276.82 | 15.31 | 15.92 | 15.82 | 15.09 | 4.73E-02 | 2.41E-01 | 3.81E-01 | 9.20E-01 | 9.92E-01 | 8.18E-02 | 1.46E-01 |
| 724.41442 | 45.92  | 14.80 | 10.61 | 9.80  | 10.46 | 5.73E-16 | 1.71E-10 | 1.00E-13 | 1.21E-10 | 5.46E-01 | 9.96E-01 | 7.13E-01 |
| 724.45948 | 45.78  | 10.44 | 11.18 | 11.02 | 12.55 | 1.71E-02 | 6.56E-01 | 7.97E-01 | 8.32E-03 | 9.95E-01 | 1.84E-01 | 1.08E-01 |
| 724.47112 | 46.94  | 13.78 | 15.74 | 14.84 | 14.29 | 1.34E-02 | 7.64E-03 | 2.91E-01 | 8.43E-01 | 4.72E-01 | 1.12E-01 | 8.24E-01 |
| 724.50393 | 278.62 | 15.83 | 15.43 | 15.47 | 15.06 | 1.77E-01 | 6.25E-01 | 6.87E-01 | 1.13E-01 | 1.00E+00 | 7.23E-01 | 6.54E-01 |
| 724.52695 | 25.02  | 22.18 | 20.11 | 19.97 | 20.53 | 2.03E-59 | 3.65E-14 | 3.65E-14 | 3.65E-14 | 5.80E-01 | 1.32E-03 | 6.36E-06 |
| 724.55718 | 46.7   | 12.34 | 17.36 | 17.19 | 17.00 | 8.54E-30 | 4.21E-14 | 4.79E-14 | 7.05E-14 | 9.80E-01 | 8.59E-01 | 9.76E-01 |
| 724.90693 | 55.57  | 16.67 | 12.76 | 9.96  | 11.33 | 1.73E-17 | 7.40E-07 | 7.34E-14 | 3.40E-11 | 9.53E-04 | 2.32E-01 | 2.66E-01 |
| 724.99925 | 53.41  | 13.52 | 17.81 | 15.61 | 15.97 | 3.04E-11 | 2.72E-12 | 1.12E-03 | 1.51E-04 | 8.56E-04 | 1.13E-02 | 9.23E-01 |
| 725.49941 | 53.03  | 8.62  | 12.12 | 9.63  | 10.99 | 3.77E-07 | 3.06E-07 | 3.56E-01 | 1.44E-03 | 6.85E-04 | 3.14E-01 | 1.62E-01 |
| 725.53054 | 25.35  | 21.06 | 18.78 | 18.61 | 19.30 | 4.11E-57 | 3.65E-14 | 3.65E-14 | 3.65E-14 | 5.01E-01 | 4.49E-04 | 9.01E-07 |
| 725.89932 | 53.99  | 14.74 | 11.63 | 11.33 | 12.57 | 1.80E-16 | 1.18E-12 | 7.97E-14 | 1.43E-06 | 8.75E-01 | 1.16E-01 | 1.60E-02 |
| 725.97055 | 52.98  | 15.12 | 11.43 | 13.64 | 11.80 | 2.21E-08 | 1.30E-07 | 8.97E-02 | 4.42E-06 | 4.47E-03 | 9.48E-01 | 3.13E-02 |
| 725.99791 | 53.1   | 10.65 | 13.77 | 11.31 | 12.89 | 7.09E-09 | 2.71E-08 | 5.60E-01 | 1.59E-04 | 2.71E-05 | 3.73E-01 | 1.80E-02 |
| 726.4145  | 46.14  | 17.00 | 14.53 | 14.80 | 14.28 | 2.31E-06 | 6.46E-05 | 3.95E-04 | 1.44E-05 | 9.66E-01 | 9.71E-01 | 8.04E-01 |
| 726.46524 | 47.6   | 12.26 | 12.58 | 10.50 | 11.99 | 4.42E-04 | 9.23E-01 | 2.97E-03 | 9.51E-01 | 4.73E-04 | 6.85E-01 | 2.84E-02 |
| 726.50621 | 25.92  | 17.43 | 14.18 | 15.53 | 14.93 | 4.66E-15 | 7.88E-14 | 3.61E-06 | 2.65E-09 | 2.77E-03 | 2.32E-01 | 4.18E-01 |
| 726.50984 | 268.67 | 14.74 | 14.24 | 14.39 | 14.56 | 7.39E-01 | 7.08E-01 | 8.69E-01 | 9.82E-01 | 9.90E-01 | 9.16E-01 | 9.84E-01 |
| 726.54926 | 41.9   | 19.58 | 17.67 | 17.60 | 18.17 | 4.63E-27 | 5.81E-14 | 4.56E-14 | 8.15E-13 | 9.79E-01 | 3.33E-02 | 9.96E-03 |
| 726.58889 | 44.52  | 11.00 | 10.95 | 11.32 | 11.67 | 3.98E-01 | 1.00E+00 | 8.89E-01 | 4.57E-01 | 8.53E-01 | 4.23E-01 | 8.73E-01 |
| 726.64658 | 48.08  | 12.07 | 11.35 | 11.27 | 12.81 | 2.37E-04 | 2.06E-01 | 1.22E-01 | 2.10E-01 | 9.96E-01 | 1.31E-03 | 5.03E-04 |
| 726.89136 | 51.81  | 15.42 | 17.48 | 17.42 | 16.64 | 7.62E-11 | 2.19E-09 | 4.05E-09 | 1.07E-03 | 9.98E-01 | 6.01E-02 | 8.48E-02 |
| 726.98074 | 52.86  | 14.25 | 12.41 | 13.15 | 12.67 | 2.43E-04 | 2.53E-04 | 5.88E-02 | 3.11E-03 | 3.64E-01 | 9.48E-01 | 7.25E-01 |
| 727.10162 | 62.69  | 12.66 | 11.49 | 12.56 | 10.84 | 5.47E-04 | 7.06E-02 | 9.96E-01 | 1.50E-03 | 1.32E-01 | 5.78E-01 | 4.20E-03 |
| 727.12276 | 253.61 | 10.85 | 15.72 | 13.64 | 13.38 | 1.41E-14 | 7.52E-14 | 3.22E-06 | 5.87E-05 | 1.34E-03 | 3.90E-04 | 9.70E-01 |
| 727.33596 | 61.23  | 10.90 | 12.28 | 12.43 | 12.09 | 2.46E-03 | 1.14E-02 | 3.60E-03 | 4.77E-02 | 9.89E-01 | 9.77E-01 | 8.91E-01 |
| 727.76521 | 50.11  | 9.02  | 12.12 | 12.34 | 11.03 | 1.04E-10 | 1.65E-08 | 9.68E-10 | 6.77E-04 | 9.72E-01 | 1.72E-01 | 6.30E-02 |
| 727.83494 | 60.56  | 11.75 | 12.48 | 13.20 | 11.43 | 6.83E-03 | 5.07E-01 | 2.81E-02 | 9.37E-01 | 5.30E-01 | 2.41E-01 | 8.15E-03 |
| 727.87848 | 270    | 15.57 | 14.41 | 15.40 | 15.35 | 1.94E-03 | 1.68E-03 | 9.43E-01 | 9.01E-01 | 1.38E-02 | 2.80E-02 | 9.99E-01 |
| 727.8968  | 51.67  | 13.39 | 11.66 | 11.16 | 11.74 | 1.49E-05 | 1.35E-03 | 1.25E-05 | 3.49E-03 | 7.12E-01 | 9.98E-01 | 6.24E-01 |
| 728.00497 | 52.31  | 11.72 | 13.37 | 12.92 | 12.69 | 1.60E-03 | 8.59E-04 | 2.58E-02 | 1.24E-01 | 7.33E-01 | 4.37E-01 | 9.56E-01 |
| 728.04196 | 272.72 | 13.28 | 17.13 | 17.13 | 16.97 | 1.28E-14 | 2.18E-11 | 1.56E-11 | 3.98E-10 | 1.00E+00 | 9.91E-01 | 9.92E-01 |
| 728.12638 | 245.86 | 9.83  | 11.97 | 9.07  | 10.57 | 1.11E-03 | 1.61E-02 | 7.10E-01 | 7.39E-01 | 5.94E-04 | 2.58E-01 | 1.90E-01 |
| 728.20668 | 270.27 | 15.43 | 14.97 | 15.55 | 15.56 | 1.94E-01 | 4.11E-01 | 9.79E-01 | 9.71E-01 | 2.35E-01 | 2.36E-01 | 1.00E+00 |
| 728.37942 | 273.02 | 15.85 | 14.14 | 14.89 | 14.75 | 2.67E-05 | 7.27E-06 | 2.66E-02 | 1.08E-02 | 1.43E-01 | 3.35E-01 | 9.79E-01 |
| 728.4107  | 45.26  | 17.56 | 15.33 | 14.13 | 15.26 | 3.34E-11 | 1.47E-05 | 9.20E-12 | 1.33E-05 | 5.76E-02 | 9.99E-01 | 9.47E-02 |

|           |        |       |       |       |       |          |          |          |          |          |          |          |
|-----------|--------|-------|-------|-------|-------|----------|----------|----------|----------|----------|----------|----------|
| 728.52512 | 31.4   | 20.50 | 19.48 | 19.63 | 19.34 | 4.97E-13 | 1.26E-09 | 1.48E-07 | 1.38E-11 | 7.99E-01 | 7.98E-01 | 2.71E-01 |
| 728.54148 | 272.93 | 11.71 | 13.67 | 13.58 | 14.10 | 1.21E-02 | 5.54E-02 | 7.01E-02 | 1.51E-02 | 9.99E-01 | 9.55E-01 | 9.22E-01 |
| 728.55339 | 44.67  | 16.49 | 15.51 | 15.43 | 16.09 | 1.44E-02 | 4.33E-02 | 2.16E-02 | 7.17E-01 | 9.96E-01 | 4.56E-01 | 3.27E-01 |
| 728.64316 | 47.7   | 12.50 | 15.57 | 15.24 | 15.99 | 8.00E-15 | 6.75E-11 | 4.03E-09 | 7.02E-13 | 8.74E-01 | 7.93E-01 | 3.44E-01 |
| 728.89117 | 51.28  | 14.20 | 16.78 | 16.39 | 16.15 | 2.05E-10 | 1.06E-09 | 1.75E-07 | 9.12E-06 | 7.66E-01 | 4.20E-01 | 9.33E-01 |
| 729.4279  | 52.64  | 13.01 | 14.35 | 13.72 | 13.10 | 1.60E-02 | 1.77E-02 | 3.84E-01 | 9.97E-01 | 5.33E-01 | 4.84E-02 | 5.59E-01 |
| 729.53202 | 34.73  | 19.49 | 18.41 | 18.50 | 18.58 | 1.15E-10 | 3.08E-09 | 3.95E-08 | 1.33E-06 | 9.56E-01 | 7.72E-01 | 9.66E-01 |
| 729.75316 | 50.4   | 12.37 | 12.85 | 12.41 | 12.48 | 4.23E-01 | 4.06E-01 | 9.99E-01 | 9.83E-01 | 5.19E-01 | 6.83E-01 | 9.96E-01 |
| 729.85971 | 55.59  | 16.03 | 12.18 | 12.23 | 11.91 | 7.72E-18 | 4.61E-13 | 5.20E-13 | 1.17E-13 | 1.00E+00 | 9.49E-01 | 9.19E-01 |
| 729.98173 | 51.96  | 18.10 | 20.08 | 20.25 | 18.85 | 2.65E-19 | 1.11E-13 | 7.45E-14 | 1.08E-02 | 8.89E-01 | 1.13E-05 | 3.13E-07 |
| 730.15665 | 57.37  | 9.19  | 10.66 | 10.20 | 11.70 | 8.55E-06 | 9.83E-03 | 1.31E-01 | 2.14E-06 | 7.69E-01 | 1.54E-01 | 1.28E-02 |
| 730.41538 | 48.32  | 17.49 | 17.22 | 16.49 | 16.11 | 1.87E-03 | 8.90E-01 | 4.28E-02 | 2.92E-03 | 2.49E-01 | 3.39E-02 | 7.81E-01 |
| 730.42294 | 51.8   | 15.10 | 15.32 | 14.73 | 14.20 | 2.95E-02 | 9.39E-01 | 7.34E-01 | 8.56E-02 | 4.05E-01 | 2.49E-02 | 5.32E-01 |
| 730.53635 | 28.49  | 23.24 | 22.90 | 22.86 | 22.52 | 4.79E-04 | 1.46E-01 | 8.90E-02 | 1.23E-04 | 9.97E-01 | 1.26E-01 | 1.81E-01 |
| 730.64269 | 48.84  | 9.53  | 10.80 | 11.12 | 12.34 | 3.67E-05 | 1.01E-01 | 2.11E-02 | 8.35E-06 | 9.44E-01 | 4.44E-02 | 1.53E-01 |
| 730.85618 | 52.28  | 14.32 | 12.09 | 12.49 | 11.90 | 2.45E-08 | 1.24E-06 | 8.93E-05 | 2.96E-07 | 7.74E-01 | 9.76E-01 | 5.34E-01 |
| 730.9824  | 52.25  | 15.24 | 17.49 | 17.83 | 15.94 | 2.31E-13 | 6.43E-09 | 1.53E-11 | 2.16E-01 | 7.76E-01 | 2.86E-04 | 4.24E-06 |
| 731.42536 | 52.39  | 13.68 | 12.05 | 11.99 | 12.38 | 5.69E-06 | 6.51E-05 | 2.37E-05 | 3.00E-03 | 9.98E-01 | 8.34E-01 | 7.33E-01 |
| 731.54098 | 26.21  | 22.12 | 21.61 | 21.64 | 21.28 | 6.84E-06 | 6.46E-03 | 1.03E-02 | 1.82E-06 | 9.98E-01 | 1.85E-01 | 1.26E-01 |
| 731.75464 | 50.17  | 13.80 | 13.00 | 12.85 | 13.07 | 3.56E-03 | 2.38E-02 | 3.73E-03 | 5.41E-02 | 9.48E-01 | 9.96E-01 | 8.75E-01 |
| 731.98034 | 52.55  | 15.15 | 17.07 | 17.35 | 15.99 | 6.02E-10 | 4.53E-07 | 4.16E-09 | 8.27E-02 | 8.52E-01 | 1.88E-02 | 1.27E-03 |
| 732.40491 | 45.28  | 16.15 | 12.44 | 11.85 | 12.44 | 2.25E-17 | 6.76E-12 | 7.62E-14 | 2.19E-11 | 6.48E-01 | 1.00E+00 | 6.65E-01 |
| 732.50357 | 47.09  | 12.92 | 16.60 | 16.43 | 15.31 | 6.63E-06 | 2.50E-05 | 5.31E-05 | 1.62E-02 | 9.97E-01 | 4.06E-01 | 5.23E-01 |
| 732.55346 | 24.82  | 26.53 | 25.49 | 25.39 | 25.66 | 8.61E-20 | 8.02E-14 | 7.54E-14 | 1.50E-10 | 8.49E-01 | 5.09E-01 | 1.29E-01 |
| 732.83019 | 50.97  | 15.06 | 8.83  | 9.37  | 9.38  | 6.94E-23 | 7.28E-14 | 7.39E-14 | 7.44E-14 | 8.32E-01 | 8.36E-01 | 1.00E+00 |
| 732.98486 | 51.38  | 15.07 | 18.13 | 17.63 | 16.70 | 5.18E-17 | 7.49E-14 | 3.67E-12 | 2.82E-05 | 4.61E-01 | 4.43E-04 | 4.41E-02 |
| 733.04688 | 45.19  | 13.22 | 13.76 | 12.17 | 12.96 | 4.98E-02 | 7.61E-01 | 2.30E-01 | 9.70E-01 | 2.85E-02 | 5.25E-01 | 5.29E-01 |
| 733.13596 | 84.15  | 9.25  | 11.28 | 12.99 | 12.17 | 4.20E-06 | 2.75E-02 | 2.38E-06 | 6.43E-04 | 9.85E-02 | 6.53E-01 | 6.99E-01 |
| 733.55656 | 25.52  | 25.26 | 24.31 | 24.18 | 24.38 | 2.00E-18 | 4.80E-13 | 7.48E-14 | 3.23E-11 | 6.99E-01 | 9.61E-01 | 4.07E-01 |
| 733.97692 | 49.13  | 12.68 | 12.25 | 12.34 | 11.56 | 3.38E-02 | 6.52E-01 | 7.92E-01 | 1.72E-02 | 9.95E-01 | 2.83E-01 | 1.79E-01 |
| 733.98537 | 51.54  | 13.34 | 17.01 | 15.78 | 15.18 | 2.64E-12 | 6.15E-13 | 1.34E-06 | 7.74E-04 | 4.84E-02 | 1.28E-03 | 5.99E-01 |
| 734.06448 | 258.75 | 12.81 | 12.79 | 14.22 | 13.71 | 4.26E-02 | 1.00E+00 | 7.22E-02 | 4.30E-01 | 8.24E-02 | 4.43E-01 | 8.44E-01 |
| 734.50046 | 47.45  | 12.67 | 15.73 | 15.81 | 15.73 | 1.93E-07 | 1.09E-05 | 4.71E-06 | 1.99E-05 | 9.99E-01 | 1.00E+00 | 9.99E-01 |
| 734.56932 | 29.35  | 24.21 | 22.50 | 22.46 | 23.32 | 2.89E-28 | 4.76E-14 | 4.19E-14 | 1.28E-07 | 9.97E-01 | 3.60E-06 | 1.11E-06 |
| 735.04897 | 201.55 | 7.77  | 13.07 | 14.42 | 12.37 | 2.44E-38 | 3.72E-14 | 3.65E-14 | 7.16E-14 | 1.25E-02 | 4.01E-01 | 4.58E-05 |
| 735.57088 | 25.09  | 22.77 | 20.73 | 20.82 | 21.62 | 7.09E-27 | 4.74E-14 | 5.78E-14 | 1.13E-08 | 9.64E-01 | 2.42E-05 | 1.51E-04 |
| 735.92805 | 54.87  | 16.91 | 14.04 | 11.97 | 13.00 | 9.62E-11 | 3.23E-04 | 7.72E-11 | 7.57E-07 | 2.14E-02 | 4.93E-01 | 4.99E-01 |
| 735.99122 | 53.43  | 18.09 | 20.42 | 19.89 | 19.01 | 2.72E-13 | 7.44E-13 | 1.90E-08 | 1.37E-02 | 2.92E-01 | 5.67E-05 | 2.49E-02 |
| 736.44546 | 47.14  | 17.25 | 15.81 | 14.97 | 15.92 | 1.08E-07 | 8.35E-04 | 2.10E-08 | 3.54E-03 | 1.33E-01 | 9.91E-01 | 7.64E-02 |
| 736.49131 | 48.78  | 12.39 | 13.38 | 11.19 | 13.26 | 6.29E-05 | 1.85E-01 | 7.02E-02 | 3.14E-01 | 1.26E-04 | 9.95E-01 | 4.99E-04 |
| 736.58082 | 33.35  | 20.72 | 19.03 | 19.09 | 19.82 | 8.97E-22 | 7.28E-14 | 7.43E-14 | 3.68E-06 | 9.81E-01 | 9.18E-05 | 3.61E-04 |
| 736.92317 | 53.46  | 14.84 | 13.69 | 12.29 | 13.83 | 1.41E-10 | 5.61E-03 | 1.15E-11 | 2.44E-02 | 5.61E-04 | 9.81E-01 | 1.81E-04 |
| 736.99348 | 53.32  | 14.52 | 17.27 | 15.56 | 16.40 | 7.98E-09 | 3.54E-09 | 6.80E-02 | 1.46E-04 | 6.29E-04 | 2.12E-01 | 2.39E-01 |
| 737.41082 | 52.35  | 12.75 | 13.20 | 12.89 | 12.15 | 1.31E-01 | 6.99E-01 | 9.86E-01 | 5.11E-01 | 8.84E-01 | 8.68E-02 | 3.41E-01 |
| 737.53388 | 54.77  | 14.00 | 10.97 | 11.39 | 13.61 | 2.30E-05 | 2.29E-04 | 1.86E-03 | 9.51E-01 | 9.41E-01 | 3.76E-03 | 1.99E-02 |
| 737.57788 | 26.4   | 17.67 | 10.75 | 10.78 | 12.94 | 4.03E-21 | 7.45E-14 | 7.39E-14 | 5.23E-09 | 1.00E+00 | 2.24E-02 | 2.36E-02 |
| 737.98799 | 53.25  | 14.85 | 17.45 | 16.55 | 15.40 | 1.77E-07 | 2.53E-07 | 1.27E-03 | 6.47E-01 | 2.25E-01 | 1.99E-04 | 8.03E-02 |
| 738.41148 | 52.42  | 12.70 | 13.31 | 13.39 | 12.21 | 2.11E-02 | 4.43E-01 | 3.17E-01 | 6.37E-01 | 9.97E-01 | 5.39E-02 | 3.00E-02 |
| 738.4445  | 46.02  | 17.36 | 16.63 | 15.57 | 16.30 | 2.67E-03 | 4.15E-01 | 9.93E-04 | 1.30E-01 | 1.29E-01 | 9.10E-01 | 4.60E-01 |
| 738.50609 | 28.1   | 19.22 | 16.62 | 16.94 | 17.03 | 1.04E-34 | 3.65E-14 | 3.83E-14 | 5.14E-14 | 3.42E-01 | 1.74E-01 | 9.72E-01 |
| 738.53685 | 42.45  | 17.51 | 14.33 | 14.28 | 15.55 | 2.37E-17 | 9.79E-14 | 8.18E-14 | 4.72E-06 | 9.99E-01 | 1.29E-02 | 8.40E-03 |
| 738.58641 | 47.44  | 13.39 | 11.87 | 12.16 | 12.97 | 1.00E-06 | 3.47E-06 | 2.15E-04 | 5.08E-01 | 7.77E-01 | 2.97E-03 | 4.65E-02 |
| 738.67525 | 48.84  | 11.78 | 11.59 | 11.88 | 12.93 | 3.31E-03 | 9.57E-01 | 9.93E-01 | 1.20E-02 | 8.71E-01 | 3.39E-03 | 3.15E-02 |
| 738.9692  | 52.72  | 12.12 | 11.83 | 12.45 | 11.24 | 1.87E-01 | 9.45E-01 | 9.28E-01 | 3.79E-01 | 6.69E-01 | 7.32E-01 | 1.42E-01 |
| 739.51027 | 27.73  | 17.49 | 13.35 | 13.86 | 14.84 | 4.41E-23 | 6.45E-14 | 7.54E-14 | 9.40E-10 | 5.68E-01 | 1.75E-03 | 7.37E-02 |
| 740.18904 | 64.66  | 15.93 | 18.85 | 17.41 | 17.57 | 1.13E-08 | 1.26E-09 | 4.25E-03 | 1.94E-03 | 8.33E-03 | 3.09E-02 | 9.87E-01 |
| 740.44259 | 46.27  | 17.38 | 15.50 | 14.87 | 15.38 | 2.39E-07 | 2.22E-04 | 2.98E-07 | 1.18E-04 | 5.27E-01 | 9.94E-01 | 7.09E-01 |
| 740.53275 | 35.36  | 21.07 | 20.01 | 19.83 | 19.94 | 3.19E-20 | 2.75E-13 | 7.45E-14 | 1.02E-13 | 5.52E-01 | 9.56E-01 | 8.67E-01 |
| 740.66904 | 49.14  | 10.30 | 11.10 | 11.54 | 12.23 | 2.09E-04 | 2.40E-01 | 1.82E-02 | 8.47E-05 | 7.37E-01 | 5.87E-02 | 4.09E-01 |
| 740.97642 | 52.81  | 12.54 | 16.52 | 16.51 | 14.40 | 1.59E-19 | 7.36E-14 | 7.56E-14 | 3.20E-04 | 1.00E+00 | 5.11E-05 | 4.76E-05 |
| 741.03976 | 53.67  | 12.51 | 12.38 | 12.26 | 12.98 | 6.10E-01 | 9.95E-01 | 9.67E-01 | 8.21E-01 | 9.97E-01 | 7.09E-01 | 5.73E-01 |
| 741.19367 | 63.7   | 14.18 | 16.06 | 13.94 | 15.16 | 6.61E-04 | 3.76E-03 | 9.71E-01 | 3.04E-01 | 1.09E-03 | 4.00E-01 | 1.50E-01 |
| 741.52861 | 32.16  | 19.98 | 17.68 | 17.57 | 18.17 | 1.03E-38 | 3.65E-14 | 3.65E-14 | 6.61E-14 | 9.18E-01 | 2.78E-02 | 3.64E-03 |
| 741.87674 | 53.75  | 13.20 | 10.74 | 10.62 | 10.47 | 1.12E-08 | 4.09E-06 | 9.72E-07 | 5.25E-07 | 9.95E-01 | 9.50E-01 | 9.90E-01 |
| 741.87702 | 238.75 | 11.48 | 12.13 | 12.76 | 12.44 | 9.64E-02 | 6.04E-01 | 6.96E-02 | 2.88E-01 | 6.47E-01 | 9.46E-01 | 9.37E-01 |
| 741.9679  | 52.78  | 12.84 | 13.24 | 13.09 | 13.10 | 5.77E-01 | 5.12E-01 | 8.11E-01 | 8.13E-01 | 9.61E-01 | 9.70E-01 | 1.00E+00 |
| 742.13321 | 242.96 | 11.23 | 13.17 | 13.91 | 13.55 | 2.04E-06 | 1.57E-03 | 3.20E-06 | 1.48E-04 | 5.09E-01 | 9.04E-01 | 9.10E-01 |
| 742.19399 | 59.94  | 12.32 | 10.89 | 10.28 | 11.64 | 1.91E-03 | 4.91E-02 | 1.25E-03 | 6.22E-01 | 6.90E-01 | 5.77E-01 | 8.72E-02 |

|           |        |       |       |       |       |          |          |          |          |          |          |          |
|-----------|--------|-------|-------|-------|-------|----------|----------|----------|----------|----------|----------|----------|
| 742.20107 | 292.05 | 15.83 | 15.21 | 17.26 | 16.03 | 1.99E-06 | 3.16E-01 | 6.00E-04 | 9.57E-01 | 6.23E-07 | 1.51E-01 | 7.71E-03 |
| 742.3829  | 242.99 | 11.57 | 12.78 | 13.59 | 12.99 | 2.83E-03 | 1.25E-01 | 1.33E-03 | 5.74E-02 | 4.61E-01 | 9.82E-01 | 7.19E-01 |
| 742.43175 | 45.82  | 15.25 | 13.13 | 12.45 | 14.10 | 9.76E-18 | 8.30E-11 | 7.64E-14 | 1.23E-03 | 1.15E-01 | 1.20E-02 | 1.62E-06 |
| 742.48037 | 41.41  | 13.39 | 14.01 | 14.46 | 13.32 | 9.92E-02 | 6.18E-01 | 1.46E-01 | 9.99E-01 | 8.18E-01 | 5.80E-01 | 1.44E-01 |
| 742.53367 | 41.02  | 18.98 | 17.21 | 17.19 | 17.57 | 2.02E-37 | 3.65E-14 | 3.65E-14 | 6.41E-14 | 9.98E-01 | 3.80E-02 | 2.28E-02 |
| 742.57394 | 25.67  | 19.05 | 17.00 | 17.29 | 17.87 | 9.82E-27 | 3.94E-14 | 7.29E-14 | 9.28E-10 | 3.56E-01 | 1.97E-05 | 8.33E-03 |
| 742.6218  | 47.67  | 8.54  | 10.76 | 10.44 | 11.64 | 1.47E-06 | 5.11E-04 | 3.59E-03 | 8.22E-07 | 9.46E-01 | 4.36E-01 | 1.71E-01 |
| 742.6314  | 240.1  | 9.96  | 12.02 | 12.13 | 12.40 | 1.04E-03 | 1.26E-02 | 6.64E-03 | 2.59E-03 | 9.98E-01 | 9.49E-01 | 9.81E-01 |
| 742.8662  | 51.33  | 15.82 | 17.84 | 17.88 | 17.14 | 5.82E-16 | 4.29E-13 | 1.54E-13 | 3.71E-06 | 9.99E-01 | 4.79E-02 | 2.96E-02 |
| 743.54177 | 43.05  | 17.64 | 17.50 | 16.49 | 17.26 | 8.00E-04 | 9.60E-01 | 6.44E-04 | 5.92E-01 | 5.73E-03 | 8.76E-01 | 6.53E-02 |
| 743.57752 | 25.46  | 17.51 | 11.98 | 13.43 | 14.61 | 9.96E-32 | 3.65E-14 | 7.16E-14 | 7.23E-11 | 2.29E-03 | 8.94E-09 | 2.36E-02 |
| 743.86716 | 52.75  | 12.67 | 12.86 | 13.10 | 12.58 | 6.76E-01 | 9.74E-01 | 7.57E-01 | 9.97E-01 | 9.50E-01 | 9.31E-01 | 6.69E-01 |
| 743.97836 | 52.88  | 14.17 | 18.01 | 17.43 | 16.35 | 5.97E-20 | 7.22E-14 | 8.89E-14 | 6.03E-07 | 4.60E-01 | 3.83E-04 | 4.01E-02 |
| 744.04881 | 51.93  | 10.92 | 12.76 | 11.18 | 12.57 | 6.42E-03 | 2.02E-02 | 9.77E-01 | 5.48E-02 | 6.99E-02 | 9.92E-01 | 1.52E-01 |
| 744.47785 | 48.02  | 14.79 | 14.90 | 13.10 | 14.80 | 7.78E-04 | 9.96E-01 | 3.48E-03 | 1.00E+00 | 2.47E-03 | 9.97E-01 | 6.52E-03 |
| 744.4926  | 41.57  | 16.41 | 14.63 | 14.91 | 15.18 | 2.00E-03 | 2.07E-03 | 1.23E-02 | 7.31E-02 | 9.46E-01 | 7.17E-01 | 9.53E-01 |
| 744.5433  | 37.33  | 20.02 | 18.97 | 18.83 | 19.26 | 2.48E-18 | 2.10E-13 | 7.52E-14 | 1.22E-07 | 6.87E-01 | 1.62E-01 | 9.13E-03 |
| 744.58937 | 26.14  | 20.07 | 18.12 | 18.27 | 18.63 | 1.63E-37 | 3.65E-14 | 3.65E-14 | 7.05E-14 | 7.27E-01 | 2.67E-03 | 5.34E-02 |
| 744.6181  | 47.11  | 10.28 | 15.75 | 15.01 | 16.05 | 4.58E-20 | 7.49E-14 | 1.46E-12 | 7.47E-14 | 6.38E-01 | 9.64E-01 | 3.61E-01 |
| 744.86643 | 51.64  | 14.83 | 17.34 | 17.34 | 16.59 | 1.96E-15 | 6.94E-13 | 4.57E-13 | 9.06E-07 | 1.00E+00 | 1.16E-01 | 1.11E-01 |
| 744.97527 | 50.03  | 12.62 | 15.44 | 14.09 | 13.98 | 1.70E-06 | 2.39E-07 | 1.65E-02 | 3.95E-02 | 4.05E-02 | 3.00E-02 | 9.97E-01 |
| 744.98478 | 52.45  | 14.15 | 12.69 | 12.33 | 12.73 | 4.51E-08 | 2.75E-05 | 8.05E-08 | 8.06E-05 | 6.76E-01 | 9.99E-01 | 6.15E-01 |
| 745.39982 | 51.98  | 11.52 | 11.98 | 12.09 | 11.17 | 3.10E-01 | 8.13E-01 | 6.82E-01 | 9.11E-01 | 9.97E-01 | 4.53E-01 | 3.28E-01 |
| 745.55637 | 25.66  | 18.65 | 14.98 | 16.30 | 17.07 | 3.48E-36 | 3.65E-14 | 7.17E-14 | 1.60E-09 | 5.46E-07 | 1.02E-13 | 1.09E-02 |
| 745.59324 | 25.67  | 18.78 | 15.13 | 16.24 | 16.95 | 1.29E-29 | 3.65E-14 | 7.59E-14 | 1.77E-09 | 4.72E-04 | 5.74E-09 | 5.80E-02 |
| 745.73583 | 49.8   | 11.43 | 11.87 | 11.96 | 11.33 | 6.09E-01 | 8.49E-01 | 7.67E-01 | 9.98E-01 | 9.99E-01 | 7.78E-01 | 6.90E-01 |
| 745.95614 | 52.45  | 17.39 | 17.31 | 18.19 | 16.17 | 7.07E-09 | 9.92E-01 | 2.66E-02 | 2.33E-04 | 1.58E-02 | 1.07E-03 | 7.29E-10 |
| 746.21158 | 275.75 | 15.14 | 14.72 | 15.25 | 15.00 | 3.69E-01 | 5.07E-01 | 9.85E-01 | 9.68E-01 | 3.29E-01 | 8.21E-01 | 8.65E-01 |
| 746.30047 | 277.28 | 15.81 | 16.09 | 15.90 | 16.38 | 4.36E-01 | 8.64E-01 | 9.95E-01 | 4.00E-01 | 9.53E-01 | 8.63E-01 | 5.63E-01 |
| 746.38395 | 272.34 | 16.04 | 16.10 | 16.41 | 16.61 | 3.08E-01 | 9.98E-01 | 6.72E-01 | 3.34E-01 | 7.93E-01 | 4.58E-01 | 9.38E-01 |
| 746.39757 | 52.55  | 14.67 | 12.90 | 12.98 | 12.57 | 3.51E-06 | 2.12E-04 | 3.84E-04 | 1.23E-05 | 9.98E-01 | 8.79E-01 | 7.89E-01 |
| 746.51655 | 33.96  | 17.45 | 10.58 | 12.62 | 12.95 | 2.95E-22 | 5.47E-14 | 8.18E-13 | 9.17E-11 | 7.46E-03 | 1.95E-03 | 9.58E-01 |
| 746.53479 | 37.03  | 11.73 | 10.19 | 13.45 | 9.38  | 9.65E-05 | 3.08E-01 | 2.07E-01 | 5.04E-02 | 2.31E-03 | 8.21E-01 | 1.10E-04 |
| 746.5459  | 276.39 | 15.74 | 15.02 | 14.73 | 14.73 | 4.29E-02 | 2.79E-01 | 5.79E-02 | 7.41E-02 | 8.98E-01 | 9.11E-01 | 1.00E+00 |
| 746.56808 | 25.74  | 20.31 | 18.40 | 18.61 | 19.00 | 1.89E-42 | 3.65E-14 | 3.65E-14 | 6.27E-14 | 2.94E-01 | 1.38E-05 | 9.35E-03 |
| 746.61105 | 36.92  | 19.02 | 15.55 | 15.76 | 16.87 | 2.09E-23 | 6.85E-14 | 7.45E-14 | 6.23E-09 | 9.21E-01 | 1.05E-03 | 8.03E-03 |
| 746.63021 | 275.16 | 15.16 | 15.01 | 14.59 | 14.48 | 3.91E-01 | 9.87E-01 | 5.65E-01 | 4.52E-01 | 7.88E-01 | 6.77E-01 | 9.96E-01 |
| 746.79732 | 279.3  | 15.43 | 15.44 | 15.77 | 15.97 | 2.86E-01 | 1.00E+00 | 7.03E-01 | 3.39E-01 | 7.43E-01 | 3.84E-01 | 9.25E-01 |
| 746.85758 | 51.27  | 13.39 | 12.03 | 11.96 | 12.68 | 4.97E-05 | 3.54E-04 | 1.43E-04 | 1.62E-01 | 9.98E-01 | 2.56E-01 | 1.79E-01 |
| 746.94224 | 277.78 | 13.96 | 15.66 | 16.01 | 16.33 | 1.28E-06 | 1.22E-03 | 4.60E-05 | 3.96E-06 | 8.75E-01 | 4.95E-01 | 9.03E-01 |
| 746.95004 | 54.4   | 17.69 | 17.46 | 16.23 | 15.63 | 2.56E-05 | 9.59E-01 | 8.47E-03 | 1.09E-04 | 4.76E-02 | 1.19E-03 | 5.91E-01 |
| 746.98358 | 53.32  | 14.14 | 13.65 | 12.25 | 13.81 | 1.76E-08 | 3.81E-01 | 1.40E-08 | 7.15E-01 | 7.57E-05 | 9.63E-01 | 1.43E-05 |
| 747.08491 | 278.04 | 16.23 | 16.00 | 16.00 | 16.66 | 1.95E-01 | 8.88E-01 | 8.88E-01 | 5.78E-01 | 1.00E+00 | 2.22E-01 | 2.18E-01 |
| 747.2286  | 279.56 | 12.87 | 16.76 | 16.42 | 16.40 | 1.84E-14 | 4.06E-12 | 1.37E-10 | 7.28E-10 | 9.19E-01 | 9.12E-01 | 1.00E+00 |
| 747.372   | 279.32 | 15.72 | 16.65 | 16.26 | 16.68 | 1.06E-02 | 1.94E-02 | 3.13E-01 | 1.99E-02 | 6.32E-01 | 1.00E+00 | 6.09E-01 |
| 747.51222 | 279.57 | 15.89 | 16.67 | 16.05 | 16.06 | 3.78E-01 | 3.36E-01 | 9.86E-01 | 9.85E-01 | 5.59E-01 | 5.97E-01 | 1.00E+00 |
| 747.57223 | 25.71  | 19.08 | 15.87 | 16.93 | 17.48 | 1.63E-27 | 3.65E-14 | 7.80E-14 | 8.94E-09 | 2.37E-04 | 2.12E-08 | 1.50E-01 |
| 747.60866 | 26.35  | 17.63 | 9.70  | 11.89 | 12.06 | 5.96E-33 | 3.65E-14 | 7.14E-14 | 7.54E-14 | 9.02E-04 | 4.69E-04 | 9.91E-01 |
| 747.95153 | 53.33  | 15.56 | 14.03 | 13.80 | 12.94 | 5.02E-11 | 8.76E-05 | 3.73E-06 | 1.78E-11 | 9.19E-01 | 1.66E-02 | 8.31E-02 |
| 748.29334 | 186.68 | 11.92 | 12.61 | 12.15 | 13.20 | 9.13E-02 | 5.37E-01 | 9.71E-01 | 7.67E-02 | 8.12E-01 | 7.05E-01 | 2.11E-01 |
| 748.30569 | 174.4  | 7.41  | 11.00 | 11.05 | 10.99 | 1.34E-23 | 7.43E-14 | 7.36E-14 | 7.52E-14 | 9.99E-01 | 1.00E+00 | 9.99E-01 |
| 748.45885 | 44.79  | 13.80 | 12.86 | 11.33 | 12.99 | 1.77E-08 | 7.01E-02 | 2.82E-09 | 1.68E-01 | 7.06E-04 | 9.89E-01 | 2.95E-04 |
| 748.47548 | 45.82  | 16.26 | 17.25 | 16.47 | 17.15 | 1.66E-01 | 2.25E-01 | 9.76E-01 | 3.35E-01 | 4.59E-01 | 9.98E-01 | 5.94E-01 |
| 748.52747 | 27.85  | 22.58 | 20.67 | 20.78 | 21.34 | 6.06E-45 | 3.65E-14 | 3.65E-14 | 6.85E-14 | 7.75E-01 | 6.75E-07 | 4.21E-05 |
| 748.56058 | 45.34  | 9.90  | 13.85 | 12.88 | 13.01 | 2.47E-10 | 5.34E-10 | 2.81E-06 | 2.40E-06 | 3.63E-01 | 5.19E-01 | 9.97E-01 |
| 748.69916 | 47.6   | 8.77  | 10.47 | 9.98  | 12.52 | 1.76E-04 | 1.48E-01 | 4.24E-01 | 4.69E-05 | 9.32E-01 | 7.53E-02 | 1.44E-02 |
| 748.95783 | 52.43  | 13.68 | 14.98 | 15.74 | 13.01 | 1.19E-04 | 1.53E-01 | 4.80E-03 | 7.20E-01 | 6.24E-01 | 1.53E-02 | 2.15E-04 |
| 749.08297 | 240.72 | 14.67 | 17.04 | 17.47 | 17.18 | 1.11E-11 | 1.08E-07 | 2.17E-10 | 4.22E-08 | 7.30E-01 | 9.89E-01 | 9.02E-01 |
| 749.11938 | 111.45 | 11.01 | 12.94 | 12.28 | 12.84 | 7.13E-05 | 1.57E-04 | 2.51E-02 | 5.81E-04 | 4.76E-01 | 9.97E-01 | 6.33E-01 |
| 749.12778 | 117.04 | 8.76  | 12.49 | 12.19 | 12.47 | 5.20E-34 | 3.67E-14 | 4.05E-14 | 3.72E-14 | 7.41E-01 | 1.00E+00 | 8.05E-01 |
| 749.28446 | 173.06 | 12.42 | 12.55 | 12.36 | 12.96 | 4.11E-01 | 9.82E-01 | 9.99E-01 | 4.69E-01 | 9.55E-01 | 7.19E-01 | 4.00E-01 |
| 749.37682 | 118.74 | 7.83  | 13.83 | 13.28 | 13.23 | 3.34E-66 | 3.65E-14 | 3.65E-14 | 3.65E-14 | 1.94E-01 | 1.51E-01 | 9.98E-01 |
| 749.3901  | 276.14 | 16.08 | 15.84 | 16.04 | 16.36 | 6.94E-01 | 9.31E-01 | 1.00E+00 | 9.12E-01 | 9.63E-01 | 6.21E-01 | 8.77E-01 |
| 749.53028 | 26.36  | 21.42 | 19.46 | 19.62 | 20.31 | 2.14E-46 | 3.65E-14 | 3.65E-14 | 7.47E-14 | 5.02E-01 | 1.05E-10 | 1.43E-07 |
| 749.62464 | 118.26 | 8.81  | 13.65 | 13.12 | 12.35 | 7.50E-30 | 3.70E-14 | 5.10E-14 | 7.45E-14 | 5.33E-01 | 8.66E-03 | 2.29E-01 |
| 749.87397 | 118.21 | 7.64  | 12.31 | 12.39 | 11.18 | 4.79E-31 | 3.76E-14 | 3.70E-14 | 7.47E-14 | 9.97E-01 | 3.07E-02 | 1.61E-02 |
| 749.89328 | 281.87 | 17.13 | 16.20 | 16.20 | 16.74 | 2.49E-02 | 4.72E-02 | 4.44E-02 | 7.14E-01 | 1.00E+00 | 4.77E-01 | 4.71E-01 |
| 749.94407 | 282.93 | 16.28 | 15.56 | 15.30 | 15.49 | 3.43E-01 | 5.98E-01 | 3.18E-01 | 5.40E-01 | 9.71E-01 | 9.99E-01 | 9.90E-01 |

|           |        |       |       |       |       |          |          |          |          |          |          |          |
|-----------|--------|-------|-------|-------|-------|----------|----------|----------|----------|----------|----------|----------|
| 749.98538 | 51.2   | 11.96 | 16.00 | 14.70 | 15.75 | 2.85E-12 | 4.74E-11 | 8.80E-06 | 1.80E-09 | 1.08E-01 | 9.74E-01 | 2.84E-01 |
| 749.99292 | 282.96 | 15.53 | 16.00 | 15.77 | 15.95 | 8.22E-01 | 8.17E-01 | 9.69E-01 | 8.77E-01 | 9.75E-01 | 1.00E+00 | 9.90E-01 |
| 750.04861 | 277.19 | 15.41 | 14.54 | 14.20 | 15.22 | 2.35E-01 | 5.51E-01 | 2.51E-01 | 9.93E-01 | 9.58E-01 | 7.61E-01 | 4.52E-01 |
| 750.08066 | 229.06 | 8.97  | 11.61 | 11.92 | 11.76 | 9.90E-16 | 8.32E-11 | 3.67E-13 | 2.53E-11 | 8.41E-01 | 9.82E-01 | 9.73E-01 |
| 750.09022 | 240.15 | 12.28 | 13.04 | 13.00 | 14.64 | 1.02E-02 | 6.73E-01 | 7.03E-01 | 4.48E-03 | 1.00E+00 | 1.19E-01 | 1.01E-01 |
| 750.14368 | 281.75 | 17.01 | 15.71 | 15.34 | 16.27 | 9.64E-04 | 1.48E-02 | 6.93E-04 | 3.36E-01 | 8.38E-01 | 6.12E-01 | 1.73E-01 |
| 750.41891 | 54.05  | 12.53 | 14.52 | 12.93 | 13.66 | 4.04E-04 | 2.93E-04 | 8.38E-01 | 1.06E-01 | 7.76E-03 | 3.28E-01 | 4.77E-01 |
| 750.47274 | 46.18  | 16.06 | 16.11 | 15.51 | 16.43 | 7.63E-02 | 9.99E-01 | 3.54E-01 | 7.05E-01 | 3.08E-01 | 8.02E-01 | 4.77E-02 |
| 750.55317 | 35.16  | 21.88 | 20.22 | 20.08 | 20.39 | 8.44E-28 | 6.58E-14 | 4.16E-14 | 7.38E-14 | 8.03E-01 | 7.36E-01 | 2.25E-01 |
| 750.56769 | 47.55  | 12.44 | 16.37 | 15.87 | 15.45 | 8.79E-24 | 6.41E-14 | 7.49E-14 | 2.99E-13 | 5.31E-01 | 8.19E-02 | 6.95E-01 |
| 751.22611 | 276.83 | 15.85 | 15.95 | 15.76 | 15.92 | 9.29E-01 | 9.85E-01 | 9.92E-01 | 9.94E-01 | 9.27E-01 | 1.00E+00 | 9.54E-01 |
| 751.36846 | 278.04 | 15.31 | 16.09 | 16.75 | 16.03 | 7.19E-05 | 5.04E-02 | 1.45E-05 | 9.47E-02 | 1.39E-01 | 9.98E-01 | 1.04E-01 |
| 751.41817 | 52.33  | 11.93 | 13.63 | 11.36 | 13.51 | 2.28E-04 | 2.30E-02 | 7.69E-01 | 4.97E-02 | 1.34E-03 | 9.97E-01 | 3.81E-03 |
| 751.51634 | 277.89 | 15.63 | 15.13 | 15.24 | 15.34 | 5.34E-01 | 4.90E-01 | 6.90E-01 | 8.57E-01 | 9.89E-01 | 9.41E-01 | 9.94E-01 |
| 751.5395  | 30.91  | 20.92 | 19.71 | 19.12 | 19.61 | 1.69E-30 | 7.43E-14 | 3.65E-14 | 7.49E-14 | 1.07E-04 | 8.81E-01 | 2.86E-03 |
| 751.65735 | 278.18 | 15.31 | 15.98 | 15.61 | 15.94 | 9.06E-02 | 1.09E-01 | 7.40E-01 | 1.62E-01 | 6.08E-01 | 9.99E-01 | 7.03E-01 |
| 751.77627 | 266.59 | 15.62 | 13.96 | 15.20 | 14.81 | 2.44E-05 | 9.06E-06 | 5.80E-01 | 9.10E-02 | 2.26E-03 | 8.13E-02 | 6.95E-01 |
| 751.87578 | 267.16 | 15.60 | 15.43 | 15.52 | 15.84 | 5.73E-01 | 9.30E-01 | 9.93E-01 | 8.41E-01 | 9.87E-01 | 5.16E-01 | 7.14E-01 |
| 751.9047  | 54.79  | 15.71 | 14.26 | 12.40 | 13.03 | 2.29E-05 | 1.66E-01 | 2.06E-05 | 1.40E-03 | 5.09E-02 | 3.50E-01 | 8.31E-01 |
| 751.96486 | 52.62  | 17.84 | 19.94 | 20.00 | 18.51 | 2.15E-15 | 1.32E-11 | 2.12E-12 | 9.88E-02 | 9.96E-01 | 1.82E-05 | 5.52E-06 |
| 751.97499 | 265.36 | 15.56 | 15.51 | 16.21 | 15.91 | 7.54E-02 | 9.99E-01 | 1.19E-01 | 6.50E-01 | 1.00E-01 | 5.82E-01 | 7.70E-01 |
| 752.02878 | 31.08  | 12.11 | 18.28 | 13.39 | 16.86 | 1.25E-22 | 7.21E-14 | 1.36E-01 | 1.72E-12 | 4.27E-13 | 1.13E-01 | 4.61E-07 |
| 752.07778 | 267.4  | 15.82 | 15.41 | 15.44 | 15.73 | 4.94E-01 | 5.70E-01 | 6.22E-01 | 9.92E-01 | 1.00E+00 | 7.82E-01 | 8.25E-01 |
| 752.1332  | 57.74  | 9.56  | 10.86 | 11.53 | 11.06 | 1.82E-05 | 7.99E-03 | 1.07E-05 | 2.04E-03 | 3.80E-01 | 9.66E-01 | 6.98E-01 |
| 752.17616 | 267.19 | 15.36 | 14.77 | 14.93 | 14.54 | 1.13E-01 | 2.98E-01 | 5.82E-01 | 8.56E-02 | 9.63E-01 | 9.18E-01 | 6.78E-01 |
| 752.27847 | 266.95 | 15.61 | 14.73 | 15.31 | 15.14 | 5.09E-02 | 2.86E-02 | 7.75E-01 | 4.59E-01 | 2.74E-01 | 6.16E-01 | 9.51E-01 |
| 752.46001 | 50.44  | 14.37 | 12.69 | 12.29 | 13.19 | 1.58E-12 | 1.69E-08 | 2.40E-12 | 2.12E-04 | 4.87E-01 | 2.93E-01 | 9.44E-03 |
| 752.47441 | 48.64  | 12.75 | 14.31 | 11.69 | 13.11 | 1.04E-04 | 2.29E-02 | 2.02E-01 | 9.14E-01 | 2.55E-05 | 1.63E-01 | 6.28E-02 |
| 752.52373 | 39.04  | 17.77 | 16.88 | 16.75 | 16.53 | 2.52E-05 | 4.87E-03 | 6.59E-04 | 4.11E-05 | 9.57E-01 | 5.77E-01 | 8.57E-01 |
| 752.56151 | 32.64  | 20.89 | 19.33 | 18.85 | 19.39 | 1.62E-35 | 5.12E-14 | 3.65E-14 | 6.94E-14 | 4.86E-03 | 9.74E-01 | 1.43E-03 |
| 752.65102 | 47.92  | 8.89  | 11.08 | 10.79 | 11.27 | 8.19E-05 | 7.43E-04 | 4.30E-03 | 2.97E-04 | 9.57E-01 | 9.88E-01 | 8.43E-01 |
| 752.89766 | 54.08  | 13.56 | 12.63 | 11.83 | 12.36 | 8.28E-03 | 2.65E-01 | 4.07E-03 | 1.02E-01 | 4.20E-01 | 9.58E-01 | 7.57E-01 |
| 752.96329 | 52.83  | 13.56 | 17.27 | 17.31 | 14.99 | 2.28E-15 | 3.62E-12 | 1.50E-12 | 2.23E-02 | 1.00E+00 | 8.53E-05 | 5.36E-05 |
| 753.5248  | 35.88  | 16.12 | 12.41 | 13.50 | 12.95 | 4.63E-13 | 2.71E-12 | 6.42E-07 | 4.93E-09 | 1.24E-01 | 7.18E-01 | 6.95E-01 |
| 753.56168 | 25.05  | 19.85 | 16.46 | 16.49 | 17.22 | 1.24E-47 | 3.65E-14 | 3.65E-14 | 3.67E-14 | 9.98E-01 | 2.36E-03 | 3.71E-03 |
| 753.9607  | 52.52  | 14.66 | 15.15 | 15.05 | 14.32 | 1.64E-02 | 2.77E-01 | 4.68E-01 | 5.98E-01 | 9.85E-01 | 2.08E-02 | 4.99E-02 |
| 754.17751 | 217.87 | 7.58  | 13.39 | 11.38 | 12.13 | 4.99E-23 | 5.41E-14 | 1.87E-11 | 9.07E-14 | 1.18E-03 | 1.03E-01 | 5.21E-01 |
| 754.50261 | 45.01  | 12.15 | 13.77 | 12.21 | 14.72 | 3.05E-06 | 1.37E-02 | 1.00E+00 | 2.58E-05 | 2.31E-02 | 3.32E-01 | 6.36E-05 |
| 754.53612 | 35.87  | 21.36 | 20.44 | 20.18 | 20.28 | 2.43E-13 | 1.11E-07 | 5.30E-12 | 9.62E-10 | 3.58E-01 | 7.56E-01 | 9.31E-01 |
| 754.56579 | 39.85  | 16.31 | 12.83 | 11.97 | 14.13 | 3.01E-19 | 8.21E-13 | 7.22E-14 | 1.57E-05 | 2.27E-01 | 2.87E-02 | 2.96E-05 |
| 754.64603 | 47.75  | 11.71 | 12.28 | 12.38 | 13.56 | 5.63E-05 | 4.17E-01 | 2.75E-01 | 1.39E-05 | 9.95E-01 | 7.32E-03 | 1.41E-02 |
| 754.67914 | 43.35  | 9.99  | 11.53 | 10.67 | 12.78 | 3.36E-05 | 3.60E-02 | 6.23E-01 | 1.73E-05 | 4.51E-01 | 1.59E-01 | 2.61E-03 |
| 754.96471 | 53.34  | 12.48 | 13.88 | 13.09 | 12.05 | 2.51E-03 | 1.94E-02 | 5.77E-01 | 8.20E-01 | 3.66E-01 | 2.10E-03 | 1.70E-01 |
| 755.03433 | 53.18  | 12.56 | 12.72 | 12.14 | 12.47 | 6.78E-01 | 9.88E-01 | 8.01E-01 | 9.97E-01 | 6.29E-01 | 9.58E-01 | 9.12E-01 |
| 755.5392  | 34.18  | 20.28 | 19.29 | 19.09 | 19.01 | 4.13E-16 | 2.46E-09 | 8.53E-13 | 2.43E-13 | 5.95E-01 | 3.18E-01 | 9.57E-01 |
| 755.96785 | 53.13  | 12.90 | 13.06 | 12.06 | 12.49 | 6.11E-02 | 9.78E-01 | 1.32E-01 | 7.30E-01 | 6.24E-02 | 5.11E-01 | 7.23E-01 |
| 756.42709 | 47.28  | 13.22 | 12.51 | 11.40 | 11.54 | 6.88E-03 | 6.25E-01 | 1.05E-02 | 2.85E-02 | 2.50E-01 | 3.95E-01 | 9.96E-01 |
| 756.50604 | 46.19  | 17.03 | 17.76 | 17.20 | 17.38 | 1.43E-01 | 1.07E-01 | 9.54E-01 | 7.06E-01 | 3.17E-01 | 6.85E-01 | 9.44E-01 |
| 756.55338 | 28.64  | 23.34 | 22.35 | 22.45 | 22.25 | 1.58E-15 | 1.11E-11 | 8.26E-10 | 4.27E-13 | 8.64E-01 | 8.87E-01 | 4.45E-01 |
| 756.88552 | 265.19 | 15.16 | 14.37 | 15.01 | 14.22 | 7.01E-02 | 2.21E-01 | 9.83E-01 | 1.16E-01 | 4.25E-01 | 9.85E-01 | 2.57E-01 |
| 757.0792  | 59.58  | 11.82 | 11.71 | 11.53 | 11.11 | 2.96E-01 | 9.93E-01 | 8.68E-01 | 2.55E-01 | 9.64E-01 | 4.22E-01 | 7.04E-01 |
| 757.55602 | 27.61  | 21.84 | 21.15 | 21.30 | 21.06 | 1.93E-06 | 4.95E-05 | 2.51E-03 | 6.02E-06 | 7.46E-01 | 9.42E-01 | 4.07E-01 |
| 757.88903 | 48.28  | 12.18 | 12.28 | 12.94 | 12.59 | 3.76E-01 | 9.96E-01 | 3.54E-01 | 8.28E-01 | 5.18E-01 | 9.28E-01 | 8.89E-01 |
| 757.97127 | 53.49  | 18.07 | 20.27 | 19.69 | 18.66 | 3.18E-10 | 1.04E-09 | 7.37E-06 | 2.96E-01 | 3.18E-01 | 3.85E-05 | 1.65E-02 |
| 758.13838 | 47.7   | 12.37 | 12.83 | 13.36 | 12.91 | 1.22E-01 | 6.66E-01 | 7.18E-02 | 5.76E-01 | 5.94E-01 | 9.98E-01 | 7.18E-01 |
| 758.40318 | 52.38  | 12.97 | 12.64 | 12.59 | 12.41 | 5.30E-01 | 8.16E-01 | 7.47E-01 | 4.69E-01 | 9.99E-01 | 9.39E-01 | 9.65E-01 |
| 758.50423 | 46.04  | 17.18 | 17.99 | 17.35 | 17.65 | 1.76E-02 | 1.33E-02 | 9.12E-01 | 3.07E-01 | 9.07E-02 | 6.25E-01 | 7.05E-01 |
| 758.56932 | 24.78  | 25.81 | 24.81 | 24.86 | 25.06 | 2.05E-18 | 7.49E-14 | 8.20E-14 | 2.19E-09 | 9.68E-01 | 1.46E-01 | 3.23E-01 |
| 758.77581 | 252.79 | 15.55 | 14.84 | 15.37 | 15.61 | 1.30E-01 | 1.67E-01 | 9.51E-01 | 9.98E-01 | 4.38E-01 | 1.48E-01 | 9.06E-01 |
| 758.84061 | 51.27  | 14.86 | 14.56 | 14.33 | 13.79 | 3.35E-04 | 5.98E-01 | 1.17E-01 | 1.23E-04 | 7.81E-01 | 1.41E-02 | 1.43E-01 |
| 758.97201 | 254.58 | 13.46 | 15.19 | 17.59 | 16.65 | 2.67E-14 | 3.50E-03 | 1.17E-13 | 1.27E-08 | 2.64E-05 | 3.00E-02 | 2.82E-01 |
| 758.97336 | 53.5   | 14.61 | 16.32 | 14.92 | 15.28 | 1.56E-04 | 8.77E-05 | 8.51E-01 | 3.27E-01 | 2.70E-03 | 5.72E-02 | 8.05E-01 |
| 759.1661  | 251.42 | 14.89 | 12.72 | 13.74 | 13.76 | 2.98E-07 | 3.84E-08 | 7.56E-03 | 1.28E-02 | 3.09E-02 | 3.44E-02 | 1.00E+00 |
| 759.17477 | 255.12 | 12.50 | 14.48 | 16.98 | 16.02 | 4.66E-17 | 3.90E-04 | 7.45E-14 | 1.50E-10 | 6.53E-06 | 1.68E-02 | 2.37E-01 |
| 759.3778  | 250.53 | 14.48 | 13.29 | 14.40 | 13.78 | 2.84E-05 | 7.60E-05 | 9.91E-01 | 5.50E-02 | 3.80E-04 | 3.05E-01 | 1.22E-01 |
| 759.40478 | 52.77  | 11.89 | 13.38 | 12.94 | 12.94 | 6.36E-03 | 4.01E-03 | 7.31E-02 | 9.25E-02 | 7.55E-01 | 7.66E-01 | 1.00E+00 |
| 759.57212 | 24.63  | 24.59 | 23.72 | 23.74 | 23.86 | 3.96E-15 | 1.76E-12 | 2.84E-12 | 6.68E-09 | 9.99E-01 | 6.44E-01 | 7.26E-01 |
| 759.96957 | 53.65  | 14.30 | 14.67 | 13.91 | 13.72 | 8.20E-02 | 7.61E-01 | 7.13E-01 | 4.33E-01 | 1.97E-01 | 8.22E-02 | 9.65E-01 |

|           |        |       |       |       |       |          |          |          |          |          |          |          |
|-----------|--------|-------|-------|-------|-------|----------|----------|----------|----------|----------|----------|----------|
| 760.50671 | 47.06  | 12.79 | 15.44 | 15.11 | 15.86 | 4.98E-06 | 1.62E-04 | 1.15E-03 | 1.51E-05 | 9.53E-01 | 9.19E-01 | 6.55E-01 |
| 760.5838  | 25.4   | 24.70 | 23.34 | 23.29 | 23.67 | 5.47E-32 | 3.74E-14 | 3.65E-14 | 7.41E-14 | 9.73E-01 | 2.43E-02 | 6.16E-03 |
| 760.82657 | 54.11  | 13.70 | 14.56 | 14.28 | 13.32 | 9.26E-03 | 1.04E-01 | 4.12E-01 | 7.55E-01 | 8.81E-01 | 1.09E-02 | 7.52E-02 |
| 760.84015 | 51.23  | 15.25 | 16.40 | 16.52 | 15.05 | 8.70E-08 | 4.75E-04 | 7.31E-05 | 9.13E-01 | 9.77E-01 | 8.81E-05 | 1.31E-05 |
| 760.94898 | 52.03  | 11.89 | 11.80 | 12.33 | 11.86 | 6.85E-01 | 9.98E-01 | 7.82E-01 | 1.00E+00 | 6.96E-01 | 1.00E+00 | 7.75E-01 |
| 761.58766 | 25.34  | 23.62 | 22.11 | 22.14 | 22.46 | 2.58E-42 | 3.65E-14 | 3.65E-14 | 4.43E-14 | 9.95E-01 | 5.14E-03 | 1.02E-02 |
| 762.1729  | 64.35  | 12.54 | 13.65 | 12.05 | 11.97 | 3.83E-03 | 1.00E-01 | 7.45E-01 | 6.64E-01 | 7.89E-03 | 6.54E-03 | 9.98E-01 |
| 762.50904 | 41.34  | 18.05 | 16.90 | 17.15 | 16.65 | 6.62E-05 | 1.28E-03 | 1.71E-02 | 8.12E-05 | 8.61E-01 | 8.69E-01 | 4.15E-01 |
| 762.52695 | 52.3   | 14.11 | 14.32 | 13.91 | 14.05 | 7.80E-01 | 9.51E-01 | 9.50E-01 | 9.99E-01 | 7.27E-01 | 9.13E-01 | 9.85E-01 |
| 762.54225 | 24.55  | 16.25 | 8.91  | 9.95  | 11.78 | 1.65E-32 | 3.65E-14 | 4.12E-14 | 3.05E-13 | 2.33E-01 | 5.89E-06 | 7.76E-03 |
| 762.59249 | 29.16  | 21.77 | 20.07 | 20.07 | 20.22 | 3.55E-37 | 3.65E-14 | 3.65E-14 | 3.87E-14 | 1.00E+00 | 6.47E-01 | 6.31E-01 |
| 762.92802 | 54.39  | 16.28 | 15.32 | 14.11 | 12.24 | 4.89E-07 | 5.02E-01 | 9.56E-03 | 2.28E-07 | 3.29E-01 | 2.21E-04 | 5.02E-02 |
| 762.95008 | 52.99  | 13.45 | 12.78 | 12.68 | 12.58 | 1.08E-02 | 8.70E-02 | 3.23E-02 | 1.64E-02 | 9.85E-01 | 9.11E-01 | 9.88E-01 |
| 763.02355 | 52.71  | 13.17 | 12.76 | 12.95 | 13.38 | 4.86E-01 | 7.27E-01 | 9.44E-01 | 9.55E-01 | 9.65E-01 | 4.50E-01 | 7.30E-01 |
| 763.32482 | 275.42 | 15.62 | 15.70 | 16.25 | 16.00 | 2.34E-01 | 9.94E-01 | 2.26E-01 | 6.92E-01 | 3.84E-01 | 8.46E-01 | 8.84E-01 |
| 763.39893 | 275.86 | 16.66 | 16.21 | 16.12 | 16.60 | 2.98E-01 | 5.36E-01 | 3.76E-01 | 9.98E-01 | 9.95E-01 | 6.90E-01 | 5.34E-01 |
| 763.51593 | 48.39  | 14.49 | 13.33 | 13.06 | 13.75 | 3.05E-03 | 2.27E-02 | 2.35E-03 | 2.82E-01 | 9.13E-01 | 7.59E-01 | 3.62E-01 |
| 763.53295 | 27.81  | 13.14 | 13.21 | 10.52 | 13.24 | 1.16E-05 | 9.99E-01 | 1.29E-04 | 9.98E-01 | 1.46E-04 | 1.00E+00 | 1.83E-04 |
| 763.59438 | 25.9   | 19.37 | 15.87 | 16.43 | 17.17 | 5.73E-33 | 3.65E-14 | 4.16E-14 | 9.20E-14 | 1.40E-01 | 1.45E-05 | 3.00E-02 |
| 763.95505 | 52.88  | 12.36 | 12.73 | 12.90 | 12.34 | 3.55E-01 | 7.37E-01 | 4.35E-01 | 1.00E+00 | 9.68E-01 | 7.47E-01 | 4.63E-01 |
| 764.03153 | 28.63  | 12.64 | 14.42 | 11.27 | 13.78 | 5.23E-10 | 6.98E-04 | 1.38E-02 | 7.25E-02 | 7.09E-10 | 5.45E-01 | 2.04E-06 |
| 764.45851 | 47.35  | 14.06 | 13.62 | 13.08 | 13.44 | 1.22E-01 | 7.09E-01 | 7.74E-02 | 4.64E-01 | 5.69E-01 | 9.77E-01 | 8.30E-01 |
| 764.55673 | 27.04  | 18.65 | 16.76 | 16.98 | 17.19 | 1.60E-22 | 7.21E-14 | 7.43E-14 | 9.53E-13 | 6.35E-01 | 1.27E-01 | 7.15E-01 |
| 764.68207 | 48.39  | 9.54  | 10.97 | 11.23 | 12.22 | 9.70E-05 | 5.56E-02 | 1.39E-02 | 3.14E-05 | 9.69E-01 | 1.51E-01 | 3.30E-01 |
| 764.80554 | 43.42  | 10.20 | 10.58 | 10.71 | 12.48 | 7.61E-05 | 8.60E-01 | 7.19E-01 | 4.99E-05 | 9.95E-01 | 1.69E-03 | 3.54E-03 |
| 765.24596 | 73.3   | 11.52 | 12.29 | 10.64 | 10.53 | 1.37E-03 | 3.73E-01 | 2.50E-01 | 1.83E-01 | 4.85E-03 | 3.31E-03 | 9.96E-01 |
| 765.56046 | 25.21  | 17.47 | 11.84 | 13.93 | 14.47 | 3.36E-25 | 3.72E-14 | 1.08E-12 | 4.29E-09 | 6.59E-05 | 7.84E-07 | 6.81E-01 |
| 765.95666 | 52.93  | 10.52 | 13.20 | 12.61 | 12.07 | 2.28E-05 | 1.58E-05 | 1.06E-03 | 3.61E-02 | 7.33E-01 | 2.21E-01 | 7.85E-01 |
| 766.02495 | 52.98  | 12.52 | 12.44 | 11.90 | 12.40 | 3.16E-01 | 9.95E-01 | 2.98E-01 | 9.87E-01 | 4.58E-01 | 1.00E+00 | 5.46E-01 |
| 766.04336 | 26.36  | 14.18 | 16.61 | 13.63 | 16.55 | 3.86E-17 | 3.53E-09 | 4.54E-01 | 1.98E-08 | 2.02E-12 | 9.99E-01 | 1.52E-11 |
| 766.36927 | 63.87  | 10.37 | 11.81 | 12.30 | 11.29 | 8.54E-06 | 1.23E-03 | 4.40E-06 | 9.47E-02 | 5.91E-01 | 5.67E-01 | 5.77E-02 |
| 766.45339 | 46.95  | 14.29 | 14.03 | 12.91 | 13.70 | 2.62E-03 | 9.04E-01 | 1.60E-03 | 4.29E-01 | 2.10E-02 | 8.41E-01 | 1.92E-01 |
| 766.5174  | 52.39  | 11.89 | 13.65 | 12.77 | 14.25 | 1.55E-06 | 3.98E-04 | 1.66E-01 | 1.63E-06 | 2.07E-01 | 5.57E-01 | 7.65E-03 |
| 766.53596 | 33.85  | 20.79 | 20.29 | 19.84 | 19.90 | 1.53E-10 | 3.60E-03 | 1.14E-09 | 5.15E-08 | 1.23E-02 | 5.74E-02 | 9.69E-01 |
| 766.57417 | 25.56  | 22.44 | 21.36 | 21.27 | 21.25 | 3.59E-14 | 1.01E-09 | 2.91E-11 | 5.10E-11 | 9.53E-01 | 9.10E-01 | 9.99E-01 |
| 766.70255 | 63.31  | 10.74 | 12.06 | 12.82 | 11.99 | 2.48E-05 | 9.86E-03 | 6.74E-06 | 2.07E-02 | 2.94E-01 | 9.99E-01 | 2.40E-01 |
| 767.39246 | 51.96  | 12.15 | 12.84 | 13.12 | 12.28 | 3.01E-02 | 2.30E-01 | 3.90E-02 | 9.86E-01 | 8.82E-01 | 4.61E-01 | 1.27E-01 |
| 767.5404  | 25.13  | 19.80 | 17.44 | 17.48 | 17.73 | 1.91E-45 | 3.65E-14 | 3.65E-14 | 3.65E-14 | 9.94E-01 | 2.44E-01 | 3.63E-01 |
| 767.57735 | 25.16  | 21.35 | 20.19 | 20.14 | 20.09 | 9.87E-14 | 1.02E-09 | 1.09E-10 | 1.12E-10 | 9.90E-01 | 9.50E-01 | 9.95E-01 |
| 767.93615 | 52.21  | 16.39 | 16.52 | 17.20 | 15.57 | 2.10E-07 | 9.52E-01 | 7.61E-03 | 1.07E-02 | 4.72E-02 | 2.79E-03 | 2.66E-08 |
| 768.49377 | 39.64  | 17.03 | 17.82 | 18.37 | 17.75 | 5.91E-08 | 1.62E-03 | 8.12E-09 | 6.49E-03 | 5.94E-02 | 9.91E-01 | 3.15E-02 |
| 768.51722 | 44.55  | 10.66 | 11.68 | 11.34 | 12.08 | 5.56E-02 | 2.02E-01 | 5.50E-01 | 3.99E-02 | 9.17E-01 | 8.85E-01 | 5.21E-01 |
| 768.5437  | 34.81  | 20.80 | 19.20 | 19.02 | 19.44 | 1.48E-33 | 3.83E-14 | 3.65E-14 | 7.25E-14 | 5.46E-01 | 3.37E-01 | 1.63E-02 |
| 768.58982 | 25.26  | 21.78 | 20.62 | 20.50 | 20.33 | 4.35E-18 | 2.82E-11 | 2.46E-13 | 7.45E-14 | 8.84E-01 | 3.33E-01 | 7.58E-01 |
| 768.93524 | 53.28  | 13.59 | 11.73 | 12.14 | 10.45 | 1.53E-07 | 1.50E-03 | 2.05E-02 | 2.79E-08 | 8.53E-01 | 7.76E-02 | 8.08E-03 |
| 768.96811 | 264.76 | 15.66 | 14.73 | 15.39 | 15.29 | 5.37E-02 | 3.07E-02 | 8.51E-01 | 6.98E-01 | 2.21E-01 | 4.02E-01 | 9.91E-01 |
| 769.06105 | 262.18 | 14.71 | 15.60 | 16.24 | 16.06 | 1.77E-03 | 1.53E-01 | 1.81E-03 | 1.10E-02 | 4.55E-01 | 7.33E-01 | 9.78E-01 |
| 769.15273 | 264.97 | 16.05 | 15.35 | 16.02 | 15.38 | 3.71E-02 | 1.12E-01 | 1.00E+00 | 1.62E-01 | 1.53E-01 | 1.00E+00 | 2.11E-01 |
| 769.24209 | 263.19 | 16.38 | 16.00 | 16.10 | 16.50 | 4.41E-01 | 6.56E-01 | 8.29E-01 | 9.85E-01 | 9.90E-01 | 4.82E-01 | 6.61E-01 |
| 769.33144 | 262.74 | 14.15 | 15.52 | 15.77 | 16.26 | 8.84E-05 | 1.77E-02 | 2.68E-03 | 7.50E-05 | 9.50E-01 | 4.21E-01 | 7.38E-01 |
| 769.42187 | 262.02 | 15.07 | 15.18 | 15.65 | 15.01 | 2.75E-01 | 9.91E-01 | 3.37E-01 | 9.98E-01 | 5.43E-01 | 9.70E-01 | 2.98E-01 |
| 769.49904 | 43.96  | 16.11 | 15.15 | 16.02 | 14.58 | 7.88E-04 | 8.90E-02 | 9.96E-01 | 1.88E-03 | 1.63E-01 | 5.58E-01 | 5.23E-03 |
| 769.51776 | 263.63 | 16.12 | 14.31 | 14.51 | 15.08 | 4.75E-06 | 9.78E-06 | 8.63E-05 | 3.15E-02 | 9.54E-01 | 2.00E-01 | 4.50E-01 |
| 769.55659 | 25.65  | 19.98 | 17.05 | 17.31 | 17.60 | 1.44E-52 | 3.65E-14 | 3.65E-14 | 3.65E-14 | 3.89E-01 | 5.37E-03 | 2.65E-01 |
| 769.59308 | 25.29  | 20.81 | 19.39 | 19.28 | 19.33 | 8.63E-30 | 6.25E-14 | 4.07E-14 | 5.81E-14 | 8.36E-01 | 9.78E-01 | 9.76E-01 |
| 769.93202 | 52.43  | 14.79 | 12.54 | 13.06 | 12.53 | 2.14E-11 | 1.26E-09 | 2.96E-06 | 2.86E-09 | 4.42E-01 | 1.00E+00 | 4.49E-01 |
| 769.97755 | 255.75 | 15.40 | 12.89 | 14.15 | 13.99 | 5.69E-09 | 6.12E-10 | 4.27E-03 | 1.45E-03 | 5.55E-03 | 2.75E-02 | 9.76E-01 |
| 770.17573 | 255.29 | 14.78 | 14.14 | 15.36 | 14.65 | 2.91E-04 | 7.75E-02 | 1.31E-01 | 9.59E-01 | 7.44E-05 | 2.78E-01 | 5.57E-02 |
| 770.37652 | 256.02 | 14.84 | 14.18 | 15.48 | 14.68 | 1.32E-05 | 3.70E-02 | 4.29E-02 | 9.23E-01 | 2.73E-06 | 2.13E-01 | 1.13E-02 |
| 770.39668 | 46.02  | 12.04 | 11.31 | 10.72 | 11.42 | 9.93E-02 | 5.02E-01 | 5.64E-02 | 6.56E-01 | 6.93E-01 | 9.97E-01 | 5.83E-01 |
| 770.5091  | 37.41  | 20.56 | 20.98 | 21.42 | 21.01 | 1.61E-03 | 2.11E-01 | 4.58E-04 | 1.72E-01 | 1.96E-01 | 9.99E-01 | 2.83E-01 |
| 770.56711 | 27.78  | 18.09 | 11.90 | 12.66 | 14.72 | 1.53E-35 | 3.65E-14 | 3.67E-14 | 4.53E-12 | 3.18E-01 | 1.70E-08 | 4.74E-05 |
| 770.57375 | 259.88 | 14.64 | 13.53 | 13.85 | 14.31 | 2.95E-01 | 2.68E-01 | 5.61E-01 | 9.51E-01 | 9.56E-01 | 6.27E-01 | 8.93E-01 |
| 770.60145 | 26.3   | 18.81 | 15.78 | 16.05 | 16.82 | 3.95E-17 | 7.65E-14 | 2.69E-13 | 2.90E-07 | 8.74E-01 | 2.44E-02 | 1.44E-01 |
| 770.94224 | 52.58  | 13.79 | 12.04 | 12.88 | 12.02 | 4.29E-06 | 2.85E-05 | 6.87E-02 | 3.58E-05 | 1.28E-01 | 1.00E+00 | 1.24E-01 |
| 771.51243 | 38.25  | 19.40 | 19.66 | 20.22 | 19.55 | 9.16E-04 | 6.09E-01 | 5.51E-04 | 9.01E-01 | 4.34E-02 | 9.60E-01 | 1.25E-02 |
| 771.5722  | 29.51  | 15.84 | 8.79  | 9.04  | 10.50 | 6.66E-32 | 3.67E-14 | 3.72E-14 | 7.56E-14 | 9.71E-01 | 2.08E-02 | 6.31E-02 |
| 771.60815 | 25.48  | 16.72 | 9.91  | 10.07 | 12.76 | 2.55E-22 | 7.38E-14 | 7.36E-14 | 2.25E-07 | 9.95E-01 | 5.50E-04 | 1.16E-03 |

|           |        |       |       |       |       |          |          |          |          |          |          |          |
|-----------|--------|-------|-------|-------|-------|----------|----------|----------|----------|----------|----------|----------|
| 772.4813  | 46.35  | 13.35 | 11.56 | 11.42 | 12.26 | 2.95E-09 | 2.57E-07 | 1.70E-08 | 4.59E-03 | 9.70E-01 | 1.64E-01 | 5.80E-02 |
| 772.50715 | 41.41  | 11.99 | 12.74 | 13.72 | 11.13 | 2.72E-03 | 6.78E-01 | 4.64E-02 | 5.97E-01 | 4.77E-01 | 1.09E-01 | 1.60E-03 |
| 772.52822 | 32.13  | 20.24 | 17.83 | 18.44 | 18.95 | 7.15E-14 | 1.28E-13 | 1.05E-08 | 1.24E-04 | 1.70E-01 | 1.81E-03 | 3.38E-01 |
| 772.58442 | 25.2   | 18.53 | 14.57 | 16.33 | 16.84 | 7.32E-29 | 3.65E-14 | 3.43E-12 | 2.30E-07 | 6.77E-08 | 1.82E-11 | 3.47E-01 |
| 772.62186 | 38.73  | 16.47 | 12.51 | 12.25 | 13.47 | 1.19E-18 | 8.58E-14 | 7.42E-14 | 7.90E-09 | 9.47E-01 | 2.08E-01 | 6.15E-02 |
| 773.07635 | 55.65  | 19.24 | 21.92 | 21.57 | 21.62 | 7.67E-20 | 7.47E-14 | 1.51E-13 | 2.43E-13 | 6.33E-01 | 7.52E-01 | 9.99E-01 |
| 773.50375 | 52.37  | 14.30 | 13.53 | 13.35 | 12.91 | 4.25E-05 | 3.61E-02 | 4.51E-03 | 1.81E-05 | 9.21E-01 | 1.62E-01 | 4.51E-01 |
| 773.52444 | 37.18  | 19.16 | 18.21 | 17.94 | 18.51 | 2.25E-05 | 1.43E-03 | 1.32E-05 | 6.47E-02 | 7.10E-01 | 6.88E-01 | 1.40E-01 |
| 773.58794 | 25.41  | 17.03 | 9.67  | 10.35 | 12.45 | 5.30E-27 | 4.16E-14 | 6.41E-14 | 8.56E-11 | 7.13E-01 | 2.21E-04 | 8.40E-03 |
| 773.94691 | 52.78  | 16.55 | 17.59 | 17.70 | 16.72 | 3.16E-11 | 3.37E-07 | 9.14E-09 | 8.21E-01 | 9.29E-01 | 7.42E-05 | 4.32E-06 |
| 774.07829 | 54.56  | 15.55 | 19.46 | 18.96 | 18.98 | 3.86E-18 | 7.52E-14 | 1.04E-12 | 4.02E-12 | 6.77E-01 | 7.27E-01 | 1.00E+00 |
| 774.47999 | 46.53  | 13.32 | 14.94 | 14.27 | 14.29 | 5.17E-03 | 2.09E-03 | 1.39E-01 | 1.50E-01 | 4.72E-01 | 5.25E-01 | 1.00E+00 |
| 774.51656 | 51.27  | 11.51 | 13.03 | 12.93 | 13.39 | 1.62E-04 | 3.46E-03 | 6.92E-03 | 2.37E-04 | 9.96E-01 | 8.63E-01 | 7.42E-01 |
| 774.54909 | 29.15  | 21.34 | 19.23 | 19.46 | 19.87 | 5.72E-37 | 3.65E-14 | 3.65E-14 | 7.32E-14 | 3.78E-01 | 2.20E-04 | 3.97E-02 |
| 774.59876 | 28     | 15.48 | 8.00  | 7.32  | 8.97  | 1.64E-30 | 4.72E-14 | 3.67E-14 | 7.28E-14 | 7.43E-01 | 5.03E-01 | 8.10E-02 |
| 774.9477  | 53.05  | 13.52 | 13.87 | 13.58 | 12.58 | 1.71E-02 | 8.12E-01 | 9.99E-01 | 9.31E-02 | 8.87E-01 | 1.16E-02 | 7.64E-02 |
| 775.07297 | 55.1   | 17.10 | 19.97 | 19.52 | 19.58 | 4.30E-20 | 7.51E-14 | 1.87E-13 | 3.09E-13 | 4.58E-01 | 5.93E-01 | 9.98E-01 |
| 775.52416 | 28.82  | 11.30 | 13.84 | 10.39 | 13.47 | 2.58E-10 | 2.64E-05 | 3.24E-01 | 6.80E-04 | 1.30E-08 | 9.17E-01 | 8.43E-07 |
| 775.54432 | 25.16  | 20.38 | 17.96 | 17.87 | 18.72 | 6.46E-45 | 3.65E-14 | 3.65E-14 | 6.98E-14 | 9.42E-01 | 2.56E-05 | 1.62E-06 |
| 775.94165 | 53     | 14.47 | 14.95 | 14.81 | 13.94 | 8.77E-03 | 3.55E-01 | 6.47E-01 | 3.17E-01 | 9.64E-01 | 8.01E-03 | 2.98E-02 |
| 776.02584 | 25.96  | 11.10 | 13.50 | 9.42  | 12.75 | 3.13E-12 | 6.32E-05 | 8.83E-03 | 1.47E-02 | 1.03E-11 | 5.49E-01 | 5.81E-08 |
| 776.0753  | 54.94  | 12.89 | 16.71 | 15.56 | 16.12 | 9.03E-10 | 2.27E-09 | 3.69E-05 | 1.03E-06 | 2.20E-01 | 7.72E-01 | 7.99E-01 |
| 776.13605 | 193.71 | 6.77  | 9.81  | 10.53 | 9.88  | 1.51E-13 | 1.25E-08 | 1.35E-12 | 1.29E-08 | 4.62E-01 | 9.99E-01 | 5.80E-01 |
| 776.15052 | 195.84 | 9.22  | 12.25 | 13.09 | 12.55 | 1.22E-19 | 7.83E-12 | 7.23E-14 | 3.28E-13 | 1.72E-01 | 8.88E-01 | 5.79E-01 |
| 776.48474 | 44.8   | 13.27 | 14.13 | 12.03 | 13.29 | 3.05E-02 | 5.88E-01 | 2.52E-01 | 1.00E+00 | 1.48E-02 | 6.43E-01 | 2.95E-01 |
| 776.51344 | 53.15  | 12.70 | 14.04 | 12.93 | 13.73 | 5.74E-03 | 9.77E-03 | 9.47E-01 | 8.38E-02 | 5.49E-02 | 9.07E-01 | 2.71E-01 |
| 776.52772 | 38.2   | 11.24 | 19.13 | 14.58 | 17.92 | 2.93E-32 | 3.65E-14 | 1.57E-07 | 5.43E-14 | 4.43E-12 | 2.06E-01 | 7.66E-07 |
| 776.55239 | 34.51  | 20.87 | 20.11 | 19.21 | 19.96 | 4.18E-19 | 1.59E-05 | 6.78E-14 | 4.27E-07 | 6.29E-07 | 8.29E-01 | 6.37E-05 |
| 776.57368 | 46.26  | 9.63  | 13.28 | 13.08 | 13.68 | 6.99E-16 | 1.19E-11 | 9.52E-11 | 3.52E-13 | 9.77E-01 | 8.66E-01 | 6.43E-01 |
| 776.8068  | 51.24  | 13.76 | 12.18 | 11.96 | 11.19 | 2.53E-07 | 1.79E-03 | 2.18E-04 | 1.28E-07 | 9.59E-01 | 1.32E-01 | 3.20E-01 |
| 777.03576 | 27.12  | 13.96 | 18.75 | 14.77 | 18.14 | 1.04E-30 | 3.92E-14 | 1.78E-01 | 7.26E-14 | 7.35E-14 | 4.78E-01 | 5.05E-13 |
| 777.06987 | 55.08  | 13.56 | 14.15 | 13.44 | 15.01 | 3.45E-02 | 7.18E-01 | 9.96E-01 | 5.67E-02 | 6.05E-01 | 4.59E-01 | 3.88E-02 |
| 777.51042 | 53.27  | 10.47 | 12.20 | 10.73 | 11.36 | 7.77E-03 | 6.49E-03 | 9.60E-01 | 3.51E-01 | 3.45E-02 | 4.39E-01 | 6.60E-01 |
| 777.55425 | 25.31  | 19.57 | 18.43 | 16.33 | 18.23 | 4.19E-28 | 3.27E-05 | 3.65E-14 | 1.23E-06 | 1.04E-13 | 8.55E-01 | 1.64E-11 |
| 777.88283 | 144.84 | 7.18  | 13.05 | 12.04 | 12.43 | 3.36E-59 | 3.65E-14 | 3.65E-14 | 3.65E-14 | 2.99E-03 | 1.68E-01 | 5.36E-01 |
| 778.04366 | 27.23  | 14.46 | 18.07 | 13.92 | 17.83 | 2.51E-27 | 7.49E-14 | 5.11E-01 | 1.16E-13 | 7.05E-14 | 9.38E-01 | 7.27E-14 |
| 778.13589 | 145.57 | 7.31  | 13.28 | 12.59 | 12.84 | 8.04E-57 | 3.65E-14 | 3.65E-14 | 3.65E-14 | 1.22E-01 | 5.26E-01 | 8.59E-01 |
| 778.14494 | 64.66  | 10.22 | 11.10 | 10.44 | 11.13 | 1.44E-01 | 2.45E-01 | 9.65E-01 | 2.34E-01 | 5.23E-01 | 1.00E+00 | 4.99E-01 |
| 778.42773 | 45.99  | 12.46 | 11.46 | 11.31 | 12.09 | 5.60E-03 | 3.19E-02 | 8.23E-03 | 7.47E-01 | 9.76E-01 | 3.65E-01 | 1.74E-01 |
| 778.53924 | 28.64  | 19.43 | 18.13 | 18.73 | 18.57 | 2.90E-11 | 5.72E-12 | 2.93E-04 | 9.35E-06 | 4.39E-03 | 8.49E-02 | 7.93E-01 |
| 778.57046 | 36.34  | 19.59 | 16.42 | 16.50 | 17.61 | 4.33E-28 | 4.23E-14 | 4.59E-14 | 9.95E-11 | 9.92E-01 | 2.66E-04 | 6.76E-04 |
| 779.25015 | 266.57 | 15.81 | 13.70 | 14.68 | 14.97 | 1.96E-08 | 2.49E-09 | 2.83E-03 | 5.47E-02 | 1.71E-02 | 1.52E-03 | 8.38E-01 |
| 779.33919 | 266.1  | 13.81 | 16.15 | 16.23 | 16.44 | 6.26E-08 | 1.28E-05 | 4.81E-06 | 1.55E-06 | 9.99E-01 | 9.45E-01 | 9.78E-01 |
| 779.42538 | 268.82 | 16.40 | 16.58 | 16.36 | 16.63 | 7.68E-01 | 9.26E-01 | 9.99E-01 | 8.64E-01 | 8.86E-01 | 9.98E-01 | 8.14E-01 |
| 779.51853 | 273.63 | 15.85 | 18.30 | 18.41 | 17.83 | 2.23E-10 | 2.61E-08 | 4.20E-09 | 1.66E-05 | 9.93E-01 | 6.82E-01 | 5.11E-01 |
| 779.53999 | 26.14  | 18.59 | 16.53 | 17.32 | 17.01 | 5.57E-15 | 8.09E-14 | 1.02E-06 | 3.38E-09 | 7.33E-03 | 2.29E-01 | 5.98E-01 |
| 779.57714 | 24.28  | 18.21 | 12.46 | 11.95 | 13.64 | 1.24E-28 | 5.67E-14 | 3.76E-14 | 8.49E-14 | 7.72E-01 | 1.39E-01 | 1.12E-02 |
| 779.61086 | 269.85 | 16.66 | 18.02 | 17.59 | 17.54 | 8.30E-05 | 3.53E-05 | 8.64E-03 | 1.94E-02 | 4.76E-01 | 4.15E-01 | 9.99E-01 |
| 779.70584 | 273.06 | 15.88 | 17.68 | 17.46 | 17.35 | 4.35E-07 | 1.71E-06 | 3.10E-05 | 2.32E-04 | 9.14E-01 | 7.85E-01 | 9.90E-01 |
| 779.79053 | 267.02 | 16.03 | 17.54 | 17.06 | 17.33 | 1.84E-05 | 2.45E-05 | 7.39E-03 | 5.71E-04 | 4.56E-01 | 9.27E-01 | 8.47E-01 |
| 779.87182 | 264.82 | 15.35 | 13.84 | 14.01 | 14.13 | 5.87E-04 | 1.05E-03 | 4.59E-03 | 1.57E-02 | 9.72E-01 | 9.03E-01 | 9.94E-01 |
| 779.88372 | 269.39 | 16.57 | 17.98 | 17.34 | 17.47 | 8.84E-04 | 3.11E-04 | 1.08E-01 | 5.07E-02 | 2.64E-01 | 5.09E-01 | 9.81E-01 |
| 779.98007 | 265.66 | 16.25 | 15.32 | 15.44 | 15.70 | 5.71E-03 | 5.86E-03 | 2.19E-02 | 2.31E-01 | 9.71E-01 | 5.70E-01 | 8.21E-01 |
| 780.06522 | 264.89 | 15.53 | 14.21 | 15.19 | 14.76 | 1.88E-03 | 1.09E-03 | 7.55E-01 | 1.37E-01 | 3.28E-02 | 4.47E-01 | 6.41E-01 |
| 780.24949 | 71.79  | 9.42  | 10.66 | 10.05 | 10.42 | 1.68E-02 | 1.29E-02 | 3.96E-01 | 7.96E-02 | 4.56E-01 | 9.42E-01 | 8.23E-01 |
| 780.28585 | 45.09  | 15.72 | 7.57  | 7.42  | 8.01  | 2.68E-48 | 3.65E-14 | 3.65E-14 | 3.65E-14 | 9.91E-01 | 8.35E-01 | 6.65E-01 |
| 780.42505 | 46.17  | 14.17 | 12.17 | 12.37 | 13.09 | 1.16E-10 | 9.18E-10 | 2.56E-08 | 2.62E-03 | 9.18E-01 | 2.11E-02 | 1.01E-01 |
| 780.43826 | 47.74  | 13.67 | 12.81 | 12.10 | 12.73 | 1.30E-02 | 2.77E-01 | 5.49E-03 | 2.23E-01 | 4.57E-01 | 9.98E-01 | 5.83E-01 |
| 780.55254 | 30.67  | 23.04 | 22.41 | 22.53 | 22.17 | 6.63E-07 | 2.56E-04 | 4.29E-03 | 3.82E-07 | 8.67E-01 | 4.46E-01 | 1.12E-01 |
| 781.49847 | 52.89  | 12.34 | 12.71 | 13.64 | 11.85 | 3.94E-02 | 9.33E-01 | 1.38E-01 | 8.57E-01 | 4.34E-01 | 5.43E-01 | 2.71E-02 |
| 781.556   | 31.55  | 21.78 | 21.28 | 21.45 | 21.07 | 5.11E-04 | 1.63E-02 | 1.93E-01 | 2.69E-04 | 7.56E-01 | 6.24E-01 | 1.32E-01 |
| 782.06219 | 52.36  | 13.86 | 12.21 | 13.13 | 13.51 | 1.04E-01 | 7.33E-02 | 7.00E-01 | 9.59E-01 | 5.44E-01 | 2.69E-01 | 9.52E-01 |
| 782.28312 | 45.09  | 17.43 | 10.24 | 10.45 | 11.16 | 2.66E-58 | 3.65E-14 | 3.65E-14 | 3.65E-14 | 9.44E-01 | 8.19E-02 | 2.47E-01 |
| 782.43498 | 48.65  | 13.03 | 12.99 | 11.50 | 12.30 | 1.81E-02 | 1.00E+00 | 2.26E-02 | 5.45E-01 | 3.77E-02 | 6.26E-01 | 4.90E-01 |
| 782.51424 | 46.78  | 15.00 | 16.00 | 14.82 | 16.05 | 1.00E-02 | 1.15E-01 | 9.78E-01 | 1.03E-01 | 5.12E-02 | 1.00E+00 | 4.60E-02 |
| 782.56843 | 24.84  | 25.59 | 24.68 | 24.59 | 24.69 | 3.12E-14 | 3.21E-10 | 3.80E-12 | 1.23E-09 | 9.13E-01 | 1.00E+00 | 8.98E-01 |
| 783.57219 | 24.4   | 24.40 | 23.65 | 23.55 | 23.55 | 1.44E-09 | 3.20E-06 | 5.65E-08 | 1.72E-07 | 8.85E-01 | 8.97E-01 | 1.00E+00 |
| 783.91376 | 52.61  | 15.71 | 12.34 | 13.87 | 12.26 | 3.20E-09 | 8.31E-08 | 7.12E-03 | 8.82E-08 | 4.77E-02 | 9.99E-01 | 3.93E-02 |

|           |        |       |       |       |       |          |          |          |          |          |          |          |
|-----------|--------|-------|-------|-------|-------|----------|----------|----------|----------|----------|----------|----------|
| 783.94485 | 52.52  | 10.31 | 11.85 | 9.93  | 11.18 | 3.66E-04 | 6.15E-03 | 8.45E-01 | 2.71E-01 | 4.68E-04 | 5.25E-01 | 5.59E-02 |
| 784.15698 | 64.16  | 11.87 | 11.76 | 10.90 | 11.42 | 1.57E-01 | 9.95E-01 | 1.44E-01 | 7.74E-01 | 2.58E-01 | 8.95E-01 | 7.00E-01 |
| 784.28012 | 45.07  | 17.38 | 9.03  | 10.07 | 11.06 | 2.99E-48 | 3.65E-14 | 3.65E-14 | 3.65E-14 | 1.31E-01 | 3.06E-04 | 1.81E-01 |
| 784.49899 | 53.02  | 11.41 | 13.07 | 12.22 | 12.86 | 2.12E-02 | 2.13E-02 | 4.91E-01 | 6.93E-02 | 4.62E-01 | 9.85E-01 | 7.09E-01 |
| 784.51448 | 47.48  | 14.31 | 16.53 | 16.09 | 16.56 | 8.65E-09 | 2.26E-07 | 3.92E-05 | 3.28E-07 | 6.88E-01 | 1.00E+00 | 6.61E-01 |
| 784.58184 | 25.27  | 23.35 | 22.50 | 22.52 | 22.40 | 1.51E-08 | 3.10E-06 | 4.54E-06 | 3.27E-07 | 9.99E-01 | 9.40E-01 | 8.97E-01 |
| 784.94726 | 52.29  | 13.25 | 12.07 | 11.66 | 12.72 | 2.75E-06 | 1.01E-03 | 2.61E-06 | 3.48E-01 | 5.57E-01 | 1.93E-01 | 6.35E-03 |
| 785.00048 | 52.76  | 11.37 | 11.80 | 11.10 | 11.84 | 3.33E-01 | 7.69E-01 | 9.34E-01 | 7.36E-01 | 4.28E-01 | 1.00E+00 | 4.03E-01 |
| 785.46981 | 34.6   | 15.91 | 14.35 | 14.50 | 14.95 | 1.38E-11 | 1.36E-10 | 4.32E-09 | 2.10E-04 | 9.15E-01 | 5.25E-02 | 2.08E-01 |
| 785.49952 | 52.64  | 12.93 | 12.82 | 12.48 | 12.78 | 7.04E-01 | 9.93E-01 | 6.55E-01 | 9.83E-01 | 8.29E-01 | 1.00E+00 | 8.86E-01 |
| 785.58777 | 25.3   | 22.19 | 21.23 | 21.33 | 21.20 | 5.90E-10 | 6.88E-08 | 9.87E-07 | 5.49E-08 | 9.43E-01 | 9.98E-01 | 8.82E-01 |
| 786.16736 | 305.88 | 15.76 | 15.82 | 14.92 | 14.84 | 8.05E-03 | 9.98E-01 | 8.33E-02 | 6.12E-02 | 6.56E-02 | 4.82E-02 | 9.97E-01 |
| 786.27736 | 44.74  | 17.14 | 9.31  | 9.95  | 11.06 | 2.01E-51 | 3.65E-14 | 3.65E-14 | 3.65E-14 | 4.55E-01 | 6.69E-04 | 5.98E-02 |
| 786.48101 | 43.14  | 16.95 | 15.39 | 15.55 | 16.50 | 1.23E-10 | 5.06E-09 | 1.36E-07 | 2.65E-01 | 9.14E-01 | 1.55E-04 | 1.60E-03 |
| 786.50939 | 46.36  | 14.65 | 12.85 | 12.98 | 13.71 | 3.68E-06 | 1.26E-05 | 4.88E-05 | 6.76E-02 | 9.87E-01 | 1.25E-01 | 2.34E-01 |
| 786.59844 | 26.89  | 22.81 | 21.91 | 21.97 | 22.25 | 4.44E-13 | 1.35E-11 | 1.31E-10 | 5.50E-05 | 9.72E-01 | 4.54E-02 | 1.21E-01 |
| 786.84537 | 51.2   | 13.71 | 12.06 | 12.35 | 12.74 | 4.92E-06 | 5.33E-06 | 2.03E-04 | 2.19E-02 | 8.30E-01 | 2.01E-01 | 6.51E-01 |
| 787.21878 | 74.78  | 11.85 | 11.83 | 9.92  | 11.65 | 2.47E-04 | 1.00E+00 | 6.63E-04 | 9.79E-01 | 1.25E-03 | 9.86E-01 | 5.79E-03 |
| 787.48235 | 38.52  | 16.08 | 13.65 | 14.37 | 14.59 | 5.71E-09 | 2.20E-09 | 3.10E-05 | 6.17E-04 | 2.34E-01 | 8.47E-02 | 9.47E-01 |
| 787.4984  | 51.26  | 13.79 | 12.99 | 12.84 | 12.89 | 6.72E-02 | 2.04E-01 | 8.71E-02 | 1.37E-01 | 9.83E-01 | 9.95E-01 | 9.99E-01 |
| 787.60296 | 25.43  | 22.21 | 20.72 | 20.82 | 20.95 | 1.61E-30 | 3.74E-14 | 4.39E-14 | 7.25E-14 | 8.70E-01 | 2.97E-01 | 7.35E-01 |
| 788.27448 | 44.21  | 16.41 | 8.39  | 8.44  | 9.49  | 1.56E-57 | 3.65E-14 | 3.65E-14 | 3.65E-14 | 1.00E+00 | 6.02E-02 | 7.40E-02 |
| 788.37893 | 50.42  | 12.17 | 11.82 | 11.25 | 11.79 | 2.49E-01 | 8.69E-01 | 1.73E-01 | 8.44E-01 | 6.06E-01 | 1.00E+00 | 6.71E-01 |
| 788.45776 | 45.8   | 13.34 | 11.90 | 12.07 | 12.98 | 1.39E-04 | 5.39E-04 | 2.71E-03 | 7.62E-01 | 9.67E-01 | 2.74E-02 | 8.29E-02 |
| 788.50213 | 49.7   | 13.31 | 14.03 | 12.64 | 13.98 | 1.23E-02 | 4.03E-01 | 4.57E-01 | 4.84E-01 | 1.85E-02 | 1.00E+00 | 2.97E-02 |
| 788.52351 | 25.13  | 18.20 | 15.94 | 15.36 | 16.45 | 9.28E-26 | 7.34E-14 | 3.87E-14 | 7.09E-11 | 8.61E-02 | 1.88E-01 | 1.29E-04 |
| 788.54594 | 27.26  | 16.58 | 16.60 | 15.54 | 15.90 | 2.99E-03 | 1.00E+00 | 8.89E-03 | 1.82E-01 | 1.04E-02 | 1.85E-01 | 7.34E-01 |
| 788.61035 | 27.32  | 21.04 | 18.89 | 18.91 | 19.64 | 1.92E-41 | 3.65E-14 | 3.65E-14 | 7.37E-14 | 9.98E-01 | 4.99E-06 | 8.60E-06 |
| 789.03286 | 26.15  | 14.39 | 15.23 | 13.84 | 15.55 | 7.16E-09 | 1.22E-02 | 1.71E-01 | 2.72E-04 | 6.96E-06 | 6.82E-01 | 4.83E-08 |
| 789.04711 | 48.88  | 17.36 | 18.55 | 17.01 | 18.75 | 3.63E-04 | 5.11E-02 | 8.69E-01 | 1.86E-02 | 6.99E-03 | 9.75E-01 | 2.18E-03 |
| 789.41352 | 282.89 | 16.73 | 16.11 | 15.82 | 16.62 | 8.44E-02 | 3.99E-01 | 9.72E-02 | 9.94E-01 | 8.93E-01 | 6.11E-01 | 2.19E-01 |
| 789.53935 | 28.23  | 17.76 | 19.11 | 17.16 | 18.85 | 6.25E-09 | 2.21E-04 | 2.37E-01 | 6.03E-03 | 6.95E-08 | 8.69E-01 | 6.59E-06 |
| 789.61759 | 26.25  | 19.78 | 15.78 | 16.48 | 17.47 | 5.23E-35 | 3.65E-14 | 3.83E-14 | 2.13E-13 | 6.80E-02 | 1.20E-07 | 3.51E-03 |
| 789.91997 | 52.14  | 16.09 | 15.72 | 16.41 | 14.78 | 7.17E-09 | 4.22E-01 | 5.47E-01 | 1.74E-06 | 3.03E-02 | 1.63E-03 | 4.81E-09 |
| 790.04611 | 36.71  | 16.92 | 18.84 | 15.87 | 18.67 | 1.56E-13 | 1.30E-05 | 3.75E-02 | 1.37E-04 | 2.20E-11 | 9.78E-01 | 6.94E-10 |
| 790.46788 | 47.82  | 11.88 | 13.17 | 11.60 | 12.55 | 9.69E-02 | 2.05E-01 | 9.74E-01 | 7.52E-01 | 9.49E-02 | 8.11E-01 | 5.17E-01 |
| 790.57264 | 25.45  | 21.33 | 20.05 | 20.32 | 20.54 | 1.03E-11 | 1.40E-11 | 6.66E-08 | 7.15E-05 | 4.31E-01 | 3.93E-02 | 6.11E-01 |
| 790.92508 | 52.78  | 13.57 | 11.25 | 12.09 | 11.66 | 1.05E-05 | 9.90E-06 | 9.23E-03 | 5.87E-04 | 3.08E-01 | 8.48E-01 | 8.19E-01 |
| 791.54168 | 24.82  | 19.26 | 15.99 | 17.05 | 17.67 | 1.32E-33 | 3.65E-14 | 7.38E-14 | 1.50E-10 | 2.55E-05 | 5.10E-11 | 3.94E-02 |
| 791.57683 | 25.05  | 20.42 | 18.88 | 19.16 | 19.58 | 2.06E-18 | 7.48E-14 | 7.21E-13 | 4.53E-06 | 3.26E-01 | 2.99E-04 | 6.18E-02 |
| 791.91217 | 277.32 | 13.00 | 16.35 | 16.57 | 15.80 | 5.55E-10 | 8.25E-08 | 7.53E-09 | 1.62E-05 | 9.82E-01 | 8.04E-01 | 5.78E-01 |
| 791.91555 | 52.42  | 14.39 | 14.57 | 15.32 | 12.15 | 1.23E-06 | 9.87E-01 | 3.13E-01 | 5.10E-04 | 5.40E-01 | 2.33E-04 | 5.32E-07 |
| 792.05345 | 48.99  | 13.64 | 12.09 | 10.51 | 13.30 | 3.33E-05 | 1.10E-01 | 3.67E-05 | 9.65E-01 | 1.08E-01 | 3.38E-01 | 7.18E-04 |
| 792.06953 | 277.41 | 15.26 | 14.80 | 15.20 | 15.04 | 5.68E-01 | 5.44E-01 | 9.98E-01 | 9.20E-01 | 6.72E-01 | 9.19E-01 | 9.68E-01 |
| 792.24155 | 277.55 | 15.74 | 16.41 | 16.49 | 16.22 | 4.20E-02 | 9.17E-02 | 4.27E-02 | 3.57E-01 | 9.93E-01 | 9.25E-01 | 8.08E-01 |
| 792.31263 | 44.63  | 16.39 | 9.28  | 9.45  | 11.07 | 6.35E-45 | 3.65E-14 | 3.65E-14 | 4.05E-14 | 9.79E-01 | 7.85E-04 | 2.82E-03 |
| 792.40917 | 277.11 | 16.00 | 16.31 | 16.29 | 16.08 | 8.00E-01 | 8.38E-01 | 8.58E-01 | 9.97E-01 | 1.00E+00 | 9.35E-01 | 9.47E-01 |
| 792.46411 | 48.05  | 13.70 | 14.56 | 13.41 | 13.90 | 9.66E-02 | 2.33E-01 | 9.20E-01 | 9.74E-01 | 6.84E-02 | 5.15E-01 | 7.41E-01 |
| 792.49225 | 52.47  | 12.46 | 14.39 | 14.49 | 13.42 | 3.08E-04 | 1.63E-03 | 7.14E-04 | 2.85E-01 | 9.98E-01 | 2.99E-01 | 2.12E-01 |
| 792.5512  | 29.46  | 20.36 | 18.59 | 18.58 | 19.16 | 1.91E-29 | 4.03E-14 | 3.87E-14 | 1.34E-12 | 1.00E+00 | 1.97E-03 | 1.35E-03 |
| 792.58883 | 25.19  | 21.59 | 20.52 | 20.59 | 20.59 | 1.78E-12 | 3.19E-10 | 2.91E-09 | 9.19E-09 | 9.72E-01 | 9.77E-01 | 1.00E+00 |
| 793.55598 | 25.96  | 19.36 | 15.87 | 16.93 | 17.48 | 3.33E-42 | 3.65E-14 | 3.74E-14 | 7.49E-14 | 2.61E-06 | 5.17E-12 | 5.09E-02 |
| 793.59281 | 25.11  | 20.67 | 19.42 | 19.51 | 19.28 | 4.29E-11 | 3.12E-08 | 2.39E-07 | 1.98E-09 | 9.73E-01 | 9.19E-01 | 7.10E-01 |
| 794.30285 | 68.5   | 15.76 | 12.24 | 8.49  | 12.35 | 2.76E-21 | 8.81E-07 | 4.98E-14 | 3.72E-06 | 2.97E-07 | 9.99E-01 | 2.73E-01 |
| 794.50953 | 39.82  | 15.01 | 16.91 | 17.43 | 16.91 | 3.19E-08 | 3.26E-05 | 5.12E-08 | 5.69E-05 | 6.00E-01 | 1.00E+00 | 6.14E-01 |
| 794.56418 | 30.06  | 19.31 | 16.71 | 17.04 | 17.28 | 3.02E-36 | 3.65E-14 | 3.67E-14 | 6.03E-14 | 3.01E-01 | 1.68E-02 | 5.65E-01 |
| 794.60593 | 26.42  | 21.40 | 20.29 | 20.24 | 20.16 | 2.30E-15 | 1.23E-10 | 1.08E-11 | 2.50E-12 | 9.88E-01 | 8.51E-01 | 9.61E-01 |
| 794.94013 | 52.85  | 14.40 | 13.25 | 12.49 | 13.34 | 1.58E-08 | 6.53E-04 | 2.26E-09 | 2.91E-03 | 6.16E-02 | 9.91E-01 | 3.28E-02 |
| 795.05814 | 53.88  | 18.41 | 20.97 | 20.84 | 20.28 | 3.47E-24 | 6.67E-14 | 7.43E-14 | 5.38E-12 | 9.45E-01 | 3.32E-02 | 1.20E-01 |
| 795.11455 | 252.89 | 12.36 | 12.95 | 12.47 | 11.77 | 4.10E-01 | 7.99E-01 | 9.98E-01 | 8.14E-01 | 8.86E-01 | 3.18E-01 | 7.38E-01 |
| 795.11583 | 60.08  | 13.72 | 14.44 | 13.98 | 13.63 | 4.51E-01 | 5.13E-01 | 9.57E-01 | 9.98E-01 | 8.28E-01 | 4.60E-01 | 9.18E-01 |
| 795.39446 | 115.91 | 6.30  | 12.40 | 12.07 | 11.61 | 1.56E-40 | 3.65E-14 | 3.65E-14 | 3.67E-14 | 8.60E-01 | 2.71E-01 | 7.15E-01 |
| 795.49086 | 53     | 13.14 | 13.65 | 12.98 | 13.49 | 5.31E-02 | 2.09E-01 | 9.24E-01 | 5.60E-01 | 6.10E-02 | 9.38E-01 | 2.46E-01 |
| 795.51034 | 38.95  | 15.02 | 13.77 | 14.91 | 14.52 | 4.10E-03 | 3.95E-03 | 9.90E-01 | 5.35E-01 | 1.34E-02 | 2.15E-01 | 7.36E-01 |
| 795.57171 | 25.81  | 18.05 | 12.50 | 14.75 | 13.93 | 3.27E-35 | 3.65E-14 | 7.42E-14 | 6.03E-14 | 4.98E-08 | 1.68E-03 | 1.45E-01 |
| 795.60871 | 25.38  | 20.57 | 19.08 | 19.06 | 18.94 | 4.60E-21 | 7.74E-14 | 7.47E-14 | 7.45E-14 | 9.99E-01 | 8.80E-01 | 9.20E-01 |
| 795.93969 | 52.68  | 13.64 | 12.92 | 12.12 | 13.05 | 2.90E-04 | 1.58E-01 | 7.07E-05 | 3.37E-01 | 1.04E-01 | 9.85E-01 | 5.07E-02 |
| 796.06001 | 53.34  | 15.13 | 18.38 | 18.10 | 17.41 | 7.01E-21 | 7.38E-14 | 7.43E-14 | 6.41E-10 | 8.40E-01 | 2.91E-02 | 1.90E-01 |

|           |        |       |       |       |       |          |          |          |          |          |          |          |
|-----------|--------|-------|-------|-------|-------|----------|----------|----------|----------|----------|----------|----------|
| 796.39796 | 45.72  | 10.41 | 11.86 | 11.57 | 12.21 | 1.43E-03 | 1.22E-02 | 6.50E-02 | 1.37E-03 | 9.29E-01 | 8.96E-01 | 5.62E-01 |
| 796.41447 | 48.03  | 13.17 | 10.61 | 10.55 | 11.86 | 2.71E-05 | 1.79E-04 | 1.05E-04 | 1.49E-01 | 1.00E+00 | 2.05E-01 | 1.69E-01 |
| 796.52433 | 38.32  | 19.99 | 20.22 | 20.85 | 20.14 | 5.67E-05 | 6.15E-01 | 3.85E-05 | 8.73E-01 | 6.64E-03 | 9.76E-01 | 2.08E-03 |
| 796.58397 | 25.78  | 19.32 | 16.45 | 16.42 | 17.71 | 4.64E-22 | 7.42E-14 | 7.63E-14 | 1.31E-06 | 1.00E+00 | 3.79E-04 | 2.31E-04 |
| 796.62019 | 29.73  | 19.43 | 17.55 | 16.52 | 17.38 | 1.96E-12 | 4.94E-06 | 7.89E-13 | 1.07E-06 | 3.70E-02 | 9.73E-01 | 1.27E-01 |
| 797.05296 | 52.76  | 16.33 | 18.62 | 18.45 | 17.84 | 1.05E-23 | 6.63E-14 | 7.45E-14 | 3.89E-10 | 8.69E-01 | 3.65E-03 | 3.36E-02 |
| 797.52819 | 38.62  | 18.58 | 19.04 | 19.64 | 18.88 | 2.67E-05 | 1.45E-01 | 7.53E-06 | 5.20E-01 | 3.40E-02 | 9.01E-01 | 5.03E-03 |
| 797.58751 | 25.69  | 18.24 | 11.85 | 13.37 | 14.68 | 3.69E-30 | 3.65E-14 | 7.07E-14 | 3.12E-11 | 1.14E-02 | 3.40E-07 | 4.41E-02 |
| 797.62372 | 25.24  | 18.22 | 13.27 | 13.48 | 13.40 | 4.36E-18 | 1.03E-13 | 2.46E-13 | 4.75E-13 | 9.84E-01 | 9.97E-01 | 9.99E-01 |
| 798.05631 | 51.06  | 12.75 | 12.53 | 12.40 | 12.83 | 5.53E-01 | 8.98E-01 | 6.87E-01 | 9.95E-01 | 9.80E-01 | 8.11E-01 | 5.80E-01 |
| 798.39837 | 45.87  | 11.90 | 11.20 | 10.95 | 11.87 | 2.44E-02 | 2.26E-01 | 4.77E-02 | 1.00E+00 | 9.14E-01 | 3.11E-01 | 8.32E-02 |
| 798.41388 | 49.12  | 12.89 | 10.50 | 9.24  | 10.40 | 6.25E-08 | 5.16E-04 | 2.03E-08 | 4.00E-04 | 1.69E-01 | 9.98E-01 | 2.54E-01 |
| 798.48779 | 46.98  | 11.81 | 13.64 | 12.05 | 12.59 | 3.43E-04 | 2.81E-04 | 9.49E-01 | 3.20E-01 | 2.87E-03 | 1.12E-01 | 6.50E-01 |
| 798.49817 | 51.32  | 12.51 | 13.79 | 11.84 | 13.35 | 4.51E-04 | 3.77E-02 | 4.77E-01 | 3.16E-01 | 4.56E-04 | 8.15E-01 | 1.41E-02 |
| 798.53929 | 39.2   | 18.98 | 18.65 | 19.06 | 18.85 | 3.02E-01 | 4.43E-01 | 9.83E-01 | 9.43E-01 | 2.70E-01 | 8.23E-01 | 8.07E-01 |
| 799.54742 | 37.7   | 17.81 | 16.75 | 17.46 | 17.30 | 5.36E-04 | 1.64E-04 | 4.77E-01 | 1.95E-01 | 2.94E-02 | 1.52E-01 | 9.36E-01 |
| 800.3441  | 45.4   | 14.58 | 8.77  | 7.43  | 8.97  | 1.24E-22 | 8.27E-14 | 6.54E-14 | 2.49E-13 | 2.07E-01 | 9.92E-01 | 1.29E-01 |
| 800.49121 | 47.37  | 13.54 | 16.00 | 15.29 | 15.42 | 1.54E-15 | 7.64E-14 | 1.09E-08 | 3.01E-09 | 6.49E-02 | 2.04E-01 | 9.71E-01 |
| 800.54506 | 39.65  | 16.38 | 12.39 | 12.87 | 12.89 | 5.47E-12 | 1.86E-10 | 1.54E-08 | 5.95E-08 | 8.44E-01 | 8.40E-01 | 1.00E+00 |
| 800.82571 | 51.04  | 13.80 | 12.67 | 13.01 | 13.33 | 1.66E-03 | 9.11E-04 | 3.60E-02 | 4.16E-01 | 6.73E-01 | 1.45E-01 | 7.18E-01 |
| 801.41297 | 262.47 | 15.92 | 14.36 | 14.92 | 15.20 | 9.08E-05 | 2.86E-05 | 1.40E-02 | 1.57E-01 | 3.61E-01 | 8.14E-02 | 8.46E-01 |
| 801.51802 | 262.33 | 16.19 | 13.74 | 14.81 | 13.64 | 7.28E-11 | 4.83E-09 | 1.82E-03 | 2.97E-09 | 3.37E-02 | 9.95E-01 | 2.03E-02 |
| 801.53478 | 25.93  | 13.60 | 13.95 | 12.94 | 14.23 | 2.50E-02 | 8.28E-01 | 3.93E-01 | 4.60E-01 | 8.80E-02 | 9.28E-01 | 1.99E-02 |
| 801.63228 | 261    | 15.45 | 13.98 | 14.87 | 14.25 | 1.98E-04 | 2.20E-04 | 3.37E-01 | 4.98E-03 | 6.56E-02 | 8.92E-01 | 3.25E-01 |
| 802.04656 | 26.11  | 13.45 | 15.27 | 13.80 | 15.63 | 6.67E-07 | 2.41E-04 | 8.55E-01 | 1.28E-05 | 5.90E-03 | 8.69E-01 | 4.89E-04 |
| 802.34178 | 45.06  | 15.60 | 11.09 | 10.54 | 11.74 | 1.98E-25 | 7.49E-14 | 4.98E-14 | 1.23E-13 | 6.30E-01 | 5.25E-01 | 5.67E-02 |
| 802.48121 | 45.68  | 14.75 | 12.65 | 13.65 | 13.58 | 2.40E-09 | 2.46E-10 | 1.82E-03 | 1.22E-03 | 7.27E-03 | 2.05E-02 | 9.96E-01 |
| 802.49406 | 47.9   | 13.53 | 13.60 | 12.78 | 13.94 | 3.20E-02 | 9.97E-01 | 1.94E-01 | 7.25E-01 | 1.52E-01 | 8.41E-01 | 2.14E-02 |
| 802.53121 | 39.97  | 15.47 | 9.95  | 13.04 | 11.35 | 9.42E-27 | 3.72E-14 | 5.60E-07 | 7.43E-14 | 5.74E-10 | 1.62E-02 | 2.07E-03 |
| 802.54322 | 30.57  | 16.20 | 18.31 | 15.35 | 17.41 | 2.10E-14 | 3.66E-08 | 7.17E-02 | 4.42E-03 | 1.52E-13 | 7.65E-02 | 3.25E-07 |
| 802.55398 | 26.74  | 9.12  | 15.64 | 12.99 | 15.63 | 1.26E-19 | 7.38E-14 | 4.32E-07 | 7.36E-14 | 1.60E-03 | 1.00E+00 | 2.31E-03 |
| 802.58122 | 40.18  | 14.80 | 13.15 | 13.12 | 14.09 | 2.51E-03 | 7.70E-03 | 6.00E-03 | 5.31E-01 | 1.00E+00 | 3.05E-01 | 2.76E-01 |
| 802.81842 | 50.94  | 13.96 | 12.82 | 12.70 | 13.33 | 2.83E-06 | 6.79E-05 | 6.66E-06 | 7.20E-02 | 9.67E-01 | 2.44E-01 | 9.30E-02 |
| 802.92528 | 52.78  | 12.76 | 12.77 | 12.59 | 12.37 | 6.69E-01 | 1.00E+00 | 9.60E-01 | 6.98E-01 | 9.53E-01 | 6.91E-01 | 9.33E-01 |
| 803.04733 | 28.13  | 14.50 | 14.36 | 13.73 | 14.42 | 7.42E-02 | 9.74E-01 | 7.37E-02 | 9.96E-01 | 2.14E-01 | 9.98E-01 | 1.65E-01 |
| 803.48127 | 52.4   | 13.55 | 12.96 | 13.11 | 13.36 | 3.83E-01 | 3.61E-01 | 6.15E-01 | 9.62E-01 | 9.76E-01 | 7.08E-01 | 9.07E-01 |
| 803.55017 | 27.93  | 14.80 | 17.19 | 12.32 | 15.89 | 2.81E-17 | 1.51E-05 | 5.49E-06 | 1.41E-01 | 7.46E-14 | 6.61E-02 | 3.96E-10 |
| 803.92387 | 53.54  | 15.10 | 14.54 | 13.21 | 13.69 | 4.19E-07 | 3.71E-01 | 5.90E-07 | 5.22E-04 | 1.28E-03 | 9.27E-02 | 5.63E-01 |
| 804.056   | 26.19  | 10.82 | 14.18 | 10.37 | 13.78 | 1.84E-11 | 3.89E-07 | 8.77E-01 | 1.63E-05 | 1.77E-08 | 9.26E-01 | 9.69E-07 |
| 804.33935 | 45.13  | 14.89 | 10.71 | 9.26  | 11.24 | 1.16E-16 | 4.61E-10 | 7.41E-14 | 1.22E-07 | 9.85E-02 | 8.46E-01 | 1.24E-02 |
| 804.42957 | 45.69  | 8.94  | 11.98 | 11.94 | 13.08 | 2.10E-11 | 7.57E-07 | 8.58E-07 | 4.42E-11 | 1.00E+00 | 2.49E-01 | 2.11E-01 |
| 804.53188 | 42.51  | 14.70 | 13.79 | 14.22 | 13.81 | 9.07E-02 | 1.12E-01 | 6.35E-01 | 1.42E-01 | 7.19E-01 | 1.00E+00 | 7.63E-01 |
| 804.55059 | 34.33  | 21.24 | 20.54 | 20.82 | 20.47 | 2.21E-05 | 2.15E-04 | 5.63E-02 | 6.09E-05 | 3.51E-01 | 9.79E-01 | 1.86E-01 |
| 805.55552 | 31.17  | 20.34 | 19.39 | 19.78 | 19.66 | 1.90E-09 | 6.92E-10 | 4.48E-04 | 2.44E-05 | 3.59E-02 | 2.69E-01 | 8.46E-01 |
| 805.89202 | 52.36  | 14.65 | 12.10 | 13.01 | 10.79 | 4.45E-10 | 1.98E-05 | 1.17E-02 | 1.53E-10 | 3.48E-01 | 9.91E-02 | 6.12E-04 |
| 806.0547  | 52.02  | 9.83  | 12.79 | 11.06 | 12.19 | 1.87E-05 | 1.78E-05 | 1.90E-01 | 1.42E-03 | 3.32E-02 | 7.95E-01 | 3.01E-01 |
| 806.4265  | 45.73  | 10.52 | 11.94 | 11.75 | 12.47 | 2.36E-04 | 8.07E-03 | 2.83E-02 | 1.50E-04 | 9.73E-01 | 6.71E-01 | 4.02E-01 |
| 806.43982 | 47.3   | 12.92 | 13.33 | 13.28 | 13.64 | 5.12E-01 | 8.10E-01 | 8.57E-01 | 4.26E-01 | 1.00E+00 | 9.21E-01 | 8.82E-01 |
| 806.49039 | 50.97  | 12.47 | 14.93 | 12.50 | 12.73 | 1.74E-05 | 6.35E-05 | 1.00E+00 | 9.64E-01 | 1.29E-04 | 1.09E-03 | 9.78E-01 |
| 806.56774 | 25.42  | 24.64 | 24.00 | 24.07 | 24.29 | 1.60E-03 | 2.10E-03 | 6.99E-03 | 2.15E-01 | 9.82E-01 | 4.18E-01 | 6.39E-01 |
| 807.55731 | 26.23  | 16.21 | 14.75 | 15.01 | 13.97 | 1.69E-02 | 1.47E-01 | 2.88E-01 | 9.06E-03 | 9.84E-01 | 7.07E-01 | 4.80E-01 |
| 807.57225 | 24.94  | 23.76 | 22.99 | 23.14 | 23.03 | 1.51E-04 | 4.22E-04 | 7.09E-03 | 1.29E-03 | 8.56E-01 | 9.98E-01 | 9.35E-01 |
| 808.14712 | 65.36  | 12.55 | 11.61 | 12.97 | 11.59 | 5.64E-03 | 1.59E-01 | 7.85E-01 | 1.64E-01 | 1.85E-02 | 1.00E+00 | 2.05E-02 |
| 808.43762 | 47.55  | 12.42 | 12.70 | 12.45 | 12.99 | 7.37E-01 | 9.56E-01 | 1.00E+00 | 7.38E-01 | 9.71E-01 | 9.58E-01 | 7.84E-01 |
| 808.52355 | 47.59  | 13.30 | 15.07 | 14.56 | 14.83 | 2.67E-03 | 2.88E-03 | 5.88E-02 | 1.78E-02 | 7.50E-01 | 9.68E-01 | 9.56E-01 |
| 808.58403 | 25.54  | 23.70 | 22.98 | 22.89 | 22.51 | 1.81E-07 | 1.69E-03 | 2.52E-04 | 7.76E-08 | 9.70E-01 | 1.12E-01 | 2.58E-01 |
| 809.47963 | 44.65  | 14.21 | 12.09 | 12.80 | 13.06 | 1.50E-06 | 4.09E-07 | 1.28E-03 | 1.76E-02 | 2.64E-01 | 8.00E-02 | 9.19E-01 |
| 809.58692 | 25.95  | 22.68 | 21.88 | 21.79 | 21.45 | 2.96E-09 | 9.59E-05 | 1.11E-05 | 2.50E-09 | 9.73E-01 | 1.32E-01 | 2.89E-01 |
| 810.12722 | 248.74 | 14.92 | 12.54 | 13.52 | 13.55 | 1.75E-07 | 2.93E-08 | 2.09E-03 | 4.36E-03 | 7.07E-02 | 7.02E-02 | 1.00E+00 |
| 810.37449 | 45.06  | 14.52 | 12.08 | 10.62 | 12.46 | 3.73E-14 | 9.92E-07 | 7.78E-14 | 7.56E-05 | 9.41E-03 | 8.64E-01 | 7.99E-04 |
| 810.52527 | 48.02  | 13.44 | 14.55 | 14.59 | 14.71 | 3.89E-03 | 2.50E-02 | 1.66E-02 | 9.33E-03 | 1.00E+00 | 9.80E-01 | 9.92E-01 |
| 810.59914 | 24.66  | 23.80 | 22.65 | 22.55 | 22.57 | 8.71E-17 | 1.16E-11 | 1.91E-13 | 1.58E-12 | 9.16E-01 | 9.57E-01 | 9.99E-01 |
| 811.03206 | 54.12  | 17.82 | 18.87 | 19.14 | 18.61 | 2.36E-08 | 1.45E-05 | 1.80E-08 | 2.60E-03 | 5.92E-01 | 6.75E-01 | 8.82E-02 |
| 811.60277 | 24.88  | 22.86 | 21.57 | 21.51 | 21.39 | 5.02E-18 | 2.62E-12 | 2.27E-13 | 8.40E-14 | 9.83E-01 | 7.25E-01 | 8.99E-01 |
| 812.03389 | 54.05  | 14.72 | 14.30 | 15.29 | 15.06 | 9.22E-02 | 7.29E-01 | 4.55E-01 | 8.32E-01 | 7.32E-02 | 2.77E-01 | 9.43E-01 |
| 812.1267  | 174.65 | 6.43  | 10.80 | 9.89  | 8.32  | 3.44E-14 | 1.79E-13 | 2.16E-09 | 3.54E-03 | 3.40E-01 | 9.66E-05 | 2.75E-02 |
| 812.37184 | 45.2   | 15.30 | 12.15 | 11.54 | 12.98 | 3.82E-24 | 7.47E-14 | 4.92E-14 | 7.21E-10 | 2.81E-01 | 9.33E-02 | 3.34E-04 |
| 812.54339 | 135.67 | 13.82 | 13.05 | 13.29 | 13.62 | 4.69E-01 | 4.41E-01 | 7.29E-01 | 9.81E-01 | 9.67E-01 | 7.24E-01 | 9.31E-01 |

|           |        |       |       |       |       |          |          |          |          |          |          |          |
|-----------|--------|-------|-------|-------|-------|----------|----------|----------|----------|----------|----------|----------|
| 812.61031 | 25.64  | 21.18 | 19.47 | 19.49 | 19.65 | 1.80E-25 | 6.81E-14 | 6.83E-14 | 7.27E-14 | 1.00E+00 | 7.16E-01 | 7.67E-01 |
| 813.02919 | 54.05  | 16.09 | 16.47 | 16.80 | 16.38 | 1.70E-01 | 6.26E-01 | 1.09E-01 | 8.02E-01 | 7.39E-01 | 9.94E-01 | 5.94E-01 |
| 813.54434 | 26.27  | 16.67 | 16.02 | 15.14 | 16.19 | 7.12E-08 | 4.35E-02 | 1.23E-08 | 2.32E-01 | 3.50E-03 | 9.14E-01 | 4.21E-04 |
| 813.54738 | 131.99 | 12.71 | 11.72 | 11.08 | 13.07 | 7.05E-04 | 2.09E-01 | 7.38E-03 | 9.03E-01 | 6.08E-01 | 6.14E-02 | 1.38E-03 |
| 813.61649 | 25.38  | 19.56 | 16.79 | 17.16 | 17.73 | 5.23E-34 | 3.65E-14 | 3.74E-14 | 7.43E-14 | 2.80E-01 | 7.41E-05 | 3.19E-02 |
| 814.03781 | 42.86  | 14.21 | 16.62 | 14.06 | 16.15 | 4.23E-11 | 8.40E-08 | 9.85E-01 | 3.70E-05 | 2.90E-08 | 7.03E-01 | 1.34E-05 |
| 814.05718 | 276.14 | 15.76 | 16.04 | 16.10 | 16.04 | 7.31E-01 | 8.28E-01 | 7.29E-01 | 8.43E-01 | 9.98E-01 | 1.00E+00 | 9.98E-01 |
| 814.15225 | 277.18 | 16.03 | 15.21 | 15.90 | 15.21 | 1.32E-02 | 4.71E-02 | 9.74E-01 | 5.53E-02 | 1.44E-01 | 1.00E+00 | 1.59E-01 |
| 814.24363 | 275.27 | 15.73 | 15.28 | 15.80 | 15.33 | 2.17E-01 | 4.30E-01 | 9.95E-01 | 5.69E-01 | 3.20E-01 | 9.98E-01 | 4.45E-01 |
| 814.36905 | 45.1   | 15.49 | 12.07 | 11.79 | 13.61 | 3.37E-17 | 3.37E-13 | 7.67E-14 | 1.42E-04 | 9.16E-01 | 3.80E-03 | 3.30E-04 |
| 814.47204 | 50.73  | 13.37 | 13.93 | 13.76 | 13.52 | 2.18E-01 | 1.97E-01 | 5.09E-01 | 9.55E-01 | 9.33E-01 | 5.18E-01 | 8.53E-01 |
| 814.55529 | 24.64  | 14.57 | 14.48 | 14.12 | 14.34 | 7.95E-01 | 9.97E-01 | 7.65E-01 | 9.63E-01 | 8.80E-01 | 9.93E-01 | 9.70E-01 |
| 814.62493 | 26.04  | 16.96 | 8.01  | 8.97  | 11.30 | 1.03E-42 | 3.65E-14 | 3.65E-14 | 7.23E-14 | 3.13E-01 | 2.29E-07 | 3.87E-04 |
| 814.93832 | 54.93  | 15.08 | 12.97 | 11.02 | 11.72 | 1.49E-17 | 1.57E-05 | 7.43E-14 | 9.50E-12 | 1.19E-04 | 3.60E-02 | 4.31E-01 |
| 815.04756 | 25.63  | 12.58 | 13.40 | 10.26 | 13.86 | 1.54E-13 | 2.38E-01 | 1.61E-06 | 2.46E-02 | 2.14E-10 | 7.59E-01 | 1.60E-12 |
| 815.47255 | 52.51  | 13.42 | 12.06 | 12.10 | 12.10 | 4.57E-06 | 6.73E-05 | 8.99E-05 | 1.78E-04 | 1.00E+00 | 9.99E-01 | 1.00E+00 |
| 815.55918 | 25.61  | 14.32 | 16.15 | 13.05 | 14.98 | 4.43E-06 | 7.28E-03 | 1.06E-01 | 6.64E-01 | 1.16E-06 | 2.06E-01 | 6.91E-03 |
| 815.91798 | 279.09 | 14.46 | 15.23 | 15.18 | 14.98 | 9.71E-02 | 1.11E-01 | 1.49E-01 | 4.44E-01 | 9.99E-01 | 9.02E-01 | 9.48E-01 |
| 815.92893 | 52.5   | 15.02 | 14.97 | 14.40 | 14.77 | 5.49E-03 | 9.93E-01 | 5.46E-03 | 5.54E-01 | 1.76E-02 | 7.38E-01 | 2.47E-01 |
| 816.06339 | 26.06  | 13.79 | 13.04 | 10.97 | 13.74 | 1.82E-15 | 1.27E-01 | 1.27E-13 | 9.99E-01 | 7.56E-08 | 2.18E-01 | 2.52E-12 |
| 816.08226 | 278.97 | 11.55 | 15.37 | 15.46 | 14.12 | 4.59E-11 | 3.59E-09 | 1.05E-09 | 1.89E-04 | 9.99E-01 | 1.90E-01 | 1.35E-01 |
| 816.46555 | 46.95  | 13.55 | 15.24 | 14.37 | 14.94 | 4.07E-09 | 5.79E-09 | 1.04E-02 | 4.00E-06 | 8.39E-03 | 7.05E-01 | 1.76E-01 |
| 816.58821 | 26.59  | 18.40 | 15.07 | 16.52 | 17.31 | 3.06E-26 | 3.67E-14 | 6.67E-11 | 4.56E-04 | 1.07E-06 | 4.38E-13 | 2.58E-02 |
| 817.03993 | 53.43  | 17.23 | 20.53 | 20.29 | 19.23 | 3.63E-18 | 7.49E-14 | 9.34E-14 | 1.15E-06 | 9.18E-01 | 4.92E-03 | 3.08E-02 |
| 817.47003 | 53.04  | 12.51 | 12.20 | 11.46 | 11.72 | 1.76E-06 | 4.23E-01 | 2.37E-06 | 1.07E-03 | 2.50E-03 | 1.16E-01 | 6.16E-01 |
| 817.59241 | 25.01  | 17.25 | 11.53 | 13.57 | 14.72 | 8.95E-35 | 3.65E-14 | 7.26E-14 | 1.86E-09 | 1.48E-06 | 3.73E-13 | 1.96E-02 |
| 817.93122 | 52.52  | 13.31 | 13.22 | 12.66 | 13.20 | 2.83E-01 | 9.93E-01 | 2.67E-01 | 9.90E-01 | 4.39E-01 | 1.00E+00 | 4.87E-01 |
| 818.04893 | 53.32  | 13.62 | 15.20 | 14.70 | 14.59 | 1.55E-03 | 7.22E-04 | 3.73E-02 | 9.37E-02 | 6.27E-01 | 4.85E-01 | 9.93E-01 |
| 818.46972 | 48.64  | 13.84 | 13.84 | 12.31 | 14.09 | 5.41E-06 | 1.00E+00 | 1.39E-04 | 9.04E-01 | 2.55E-04 | 9.10E-01 | 2.27E-05 |
| 818.51003 | 40.31  | 15.60 | 16.34 | 17.70 | 15.76 | 5.23E-05 | 3.90E-01 | 5.88E-05 | 9.88E-01 | 2.62E-02 | 6.42E-01 | 6.20E-04 |
| 818.60442 | 25.11  | 19.34 | 17.75 | 17.92 | 18.27 | 6.26E-10 | 3.53E-09 | 1.11E-07 | 1.84E-04 | 9.05E-01 | 1.91E-01 | 5.30E-01 |
| 818.78757 | 52.99  | 11.27 | 11.51 | 11.18 | 10.92 | 4.78E-01 | 8.99E-01 | 9.94E-01 | 7.77E-01 | 7.93E-01 | 3.93E-01 | 9.00E-01 |
| 819.04002 | 53.23  | 14.72 | 17.98 | 17.64 | 16.51 | 2.21E-18 | 7.49E-14 | 1.14E-13 | 8.50E-06 | 7.76E-01 | 5.95E-04 | 1.33E-02 |
| 819.51697 | 40.49  | 15.70 | 13.79 | 14.95 | 13.65 | 2.73E-06 | 5.77E-05 | 2.76E-01 | 2.41E-05 | 3.95E-02 | 9.90E-01 | 2.00E-02 |
| 819.60811 | 24.73  | 18.53 | 14.92 | 16.37 | 17.00 | 1.54E-27 | 3.65E-14 | 7.36E-13 | 9.41E-07 | 3.12E-06 | 6.86E-11 | 1.31E-01 |
| 820.40776 | 45.11  | 13.05 | 13.07 | 13.08 | 13.00 | 9.99E-01 | 1.00E+00 | 1.00E+00 | 1.00E+00 | 1.00E+00 | 9.99E-01 | 9.98E-01 |
| 820.41679 | 278.03 | 16.08 | 15.26 | 15.57 | 15.20 | 3.09E-02 | 5.51E-02 | 3.91E-01 | 4.31E-02 | 7.72E-01 | 9.99E-01 | 6.94E-01 |
| 820.52466 | 38.6   | 19.25 | 19.95 | 20.48 | 19.69 | 2.77E-07 | 4.87E-03 | 5.83E-08 | 1.66E-01 | 6.66E-02 | 6.43E-01 | 2.20E-03 |
| 820.58402 | 25.04  | 17.62 | 13.40 | 14.78 | 16.36 | 6.39E-23 | 5.43E-14 | 5.93E-12 | 7.30E-03 | 2.40E-03 | 1.72E-11 | 5.58E-04 |
| 820.58591 | 278.32 | 13.92 | 16.46 | 15.86 | 15.83 | 1.44E-06 | 1.55E-06 | 3.25E-04 | 7.41E-04 | 6.18E-01 | 6.00E-01 | 1.00E+00 |
| 820.62003 | 25.06  | 18.82 | 16.46 | 16.96 | 17.09 | 8.61E-16 | 7.80E-14 | 2.34E-10 | 1.34E-08 | 2.80E-01 | 1.28E-01 | 9.66E-01 |
| 820.74506 | 278.37 | 15.55 | 14.70 | 15.06 | 15.11 | 6.92E-02 | 3.79E-02 | 3.90E-01 | 5.25E-01 | 6.91E-01 | 6.12E-01 | 9.98E-01 |
| 820.91529 | 278.38 | 15.01 | 15.30 | 15.51 | 15.06 | 4.40E-01 | 8.27E-01 | 4.36E-01 | 9.99E-01 | 9.25E-01 | 9.10E-01 | 5.78E-01 |
| 821.528   | 38.89  | 18.02 | 18.97 | 19.37 | 18.92 | 2.95E-09 | 3.43E-05 | 1.21E-09 | 1.46E-04 | 2.25E-01 | 9.97E-01 | 1.62E-01 |
| 821.58914 | 24.8   | 16.08 | 8.17  | 9.36  | 10.75 | 6.09E-41 | 3.65E-14 | 3.65E-14 | 6.87E-14 | 8.51E-02 | 7.90E-06 | 3.74E-02 |
| 821.62382 | 24.84  | 17.60 | 11.09 | 13.86 | 13.10 | 9.44E-20 | 7.05E-14 | 3.22E-08 | 1.32E-10 | 1.15E-04 | 1.29E-02 | 6.49E-01 |
| 822.40517 | 45.22  | 13.86 | 14.11 | 13.14 | 13.53 | 1.03E-01 | 9.23E-01 | 2.63E-01 | 8.57E-01 | 8.36E-02 | 5.24E-01 | 7.78E-01 |
| 822.42441 | 48.67  | 12.20 | 8.87  | 8.96  | 9.59  | 1.17E-09 | 3.04E-08 | 5.29E-08 | 3.48E-05 | 9.99E-01 | 5.98E-01 | 6.87E-01 |
| 822.52896 | 42.91  | 14.83 | 13.51 | 13.57 | 14.29 | 2.10E-05 | 1.04E-04 | 2.03E-04 | 3.05E-01 | 9.97E-01 | 6.98E-02 | 1.05E-01 |
| 822.54007 | 40.31  | 15.72 | 16.52 | 17.28 | 17.22 | 4.39E-06 | 7.10E-02 | 1.43E-05 | 7.34E-05 | 1.03E-01 | 1.84E-01 | 9.97E-01 |
| 822.55964 | 32.87  | 15.36 | 11.58 | 13.86 | 12.21 | 4.60E-11 | 1.88E-10 | 2.76E-02 | 2.51E-07 | 3.20E-04 | 6.91E-01 | 2.10E-02 |
| 822.59943 | 25.15  | 17.48 | 12.76 | 13.01 | 14.82 | 6.90E-22 | 7.33E-14 | 7.52E-14 | 5.14E-07 | 9.54E-01 | 2.79E-04 | 1.69E-03 |
| 822.63561 | 27.13  | 17.57 | 12.56 | 12.36 | 13.59 | 5.84E-20 | 7.43E-14 | 7.41E-14 | 2.12E-10 | 9.86E-01 | 2.98E-01 | 1.54E-01 |
| 823.26241 | 271.68 | 14.82 | 14.58 | 15.73 | 15.19 | 1.04E-02 | 9.10E-01 | 4.42E-02 | 7.25E-01 | 8.54E-03 | 3.59E-01 | 4.59E-01 |
| 823.42854 | 273.17 | 13.86 | 17.94 | 17.40 | 17.37 | 5.71E-18 | 7.51E-14 | 1.30E-12 | 9.69E-12 | 6.53E-01 | 6.39E-01 | 1.00E+00 |
| 823.42895 | 45.6   | 14.53 | 12.52 | 12.65 | 13.58 | 5.49E-05 | 1.60E-04 | 4.17E-04 | 2.04E-01 | 9.93E-01 | 1.44E-01 | 2.33E-01 |
| 823.54357 | 41.19  | 14.84 | 13.76 | 15.31 | 14.90 | 2.65E-03 | 4.11E-02 | 6.53E-01 | 9.99E-01 | 1.42E-03 | 4.24E-02 | 7.74E-01 |
| 823.58524 | 270.97 | 15.30 | 14.15 | 14.55 | 14.33 | 1.37E-02 | 1.23E-02 | 1.79E-01 | 5.67E-02 | 7.23E-01 | 9.70E-01 | 9.42E-01 |
| 823.59747 | 273.42 | 13.67 | 18.14 | 17.83 | 17.02 | 9.86E-16 | 1.65E-13 | 2.08E-12 | 4.22E-08 | 9.44E-01 | 2.10E-01 | 4.87E-01 |
| 823.63961 | 25.09  | 15.98 | 8.11  | 7.96  | 9.59  | 2.77E-45 | 3.65E-14 | 3.65E-14 | 3.70E-14 | 9.90E-01 | 2.54E-02 | 9.70E-03 |
| 823.76027 | 273.75 | 15.87 | 15.80 | 15.87 | 15.64 | 9.02E-01 | 9.97E-01 | 1.00E+00 | 9.05E-01 | 9.97E-01 | 9.65E-01 | 9.10E-01 |
| 823.92846 | 270.97 | 15.30 | 14.97 | 15.85 | 15.19 | 1.47E-01 | 8.16E-01 | 4.68E-01 | 9.92E-01 | 1.10E-01 | 9.46E-01 | 3.53E-01 |
| 824.09672 | 270.34 | 15.79 | 14.95 | 15.86 | 15.38 | 2.99E-02 | 5.67E-02 | 9.96E-01 | 6.12E-01 | 3.85E-02 | 6.20E-01 | 5.00E-01 |
| 824.26188 | 270.82 | 15.97 | 14.45 | 15.88 | 14.76 | 3.94E-06 | 6.27E-05 | 9.93E-01 | 3.14E-03 | 2.89E-04 | 8.23E-01 | 9.51E-03 |
| 824.39524 | 44.98  | 13.81 | 12.01 | 11.39 | 12.56 | 5.95E-09 | 1.72E-05 | 2.77E-09 | 6.96E-03 | 3.68E-01 | 5.19E-01 | 1.75E-02 |
| 824.49469 | 46.54  | 13.32 | 13.72 | 13.17 | 14.71 | 1.06E-04 | 6.28E-01 | 9.69E-01 | 5.03E-04 | 3.77E-01 | 3.31E-02 | 1.31E-04 |
| 824.55902 | 38.78  | 17.50 | 16.11 | 16.94 | 16.69 | 3.06E-05 | 7.52E-06 | 1.89E-01 | 2.77E-02 | 1.98E-02 | 1.97E-01 | 8.30E-01 |
| 824.6141  | 25.33  | 15.62 | 7.81  | 8.18  | 9.47  | 1.56E-70 | 3.65E-14 | 3.65E-14 | 3.65E-14 | 6.60E-01 | 1.26E-05 | 1.10E-03 |

|           |        |       |       |       |       |          |          |          |          |          |          |          |
|-----------|--------|-------|-------|-------|-------|----------|----------|----------|----------|----------|----------|----------|
| 825.25666 | 278.55 | 16.00 | 15.28 | 15.52 | 15.25 | 4.29E-02 | 6.67E-02 | 3.53E-01 | 6.23E-02 | 8.44E-01 | 1.00E+00 | 8.10E-01 |
| 825.42536 | 278.57 | 16.13 | 15.11 | 15.59 | 15.80 | 2.06E-02 | 1.03E-02 | 3.30E-01 | 7.48E-01 | 4.83E-01 | 1.94E-01 | 9.26E-01 |
| 825.56225 | 39.46  | 15.75 | 11.62 | 13.78 | 12.31 | 1.18E-11 | 3.05E-11 | 2.85E-03 | 6.78E-08 | 1.45E-03 | 6.62E-01 | 6.72E-02 |
| 825.58981 | 278.76 | 15.67 | 15.49 | 15.89 | 15.71 | 6.74E-01 | 9.42E-01 | 8.91E-01 | 9.99E-01 | 5.99E-01 | 9.09E-01 | 9.49E-01 |
| 825.96027 | 54.7   | 14.38 | 13.87 | 11.79 | 12.21 | 1.14E-05 | 8.20E-01 | 5.82E-05 | 1.77E-03 | 2.88E-03 | 3.46E-02 | 9.01E-01 |
| 826.49402 | 47.06  | 13.29 | 13.96 | 13.62 | 14.34 | 2.66E-03 | 7.49E-02 | 6.36E-01 | 1.67E-03 | 6.13E-01 | 5.82E-01 | 6.66E-02 |
| 827.58858 | 274.57 | 16.49 | 15.91 | 15.96 | 16.17 | 2.87E-01 | 2.98E-01 | 3.73E-01 | 7.89E-01 | 9.99E-01 | 8.74E-01 | 9.28E-01 |
| 827.75465 | 280.66 | 17.06 | 22.13 | 22.11 | 20.97 | 1.32E-34 | 3.65E-14 | 3.65E-14 | 7.23E-14 | 1.00E+00 | 2.32E-02 | 2.44E-02 |
| 827.92134 | 280.78 | 17.37 | 23.51 | 23.48 | 22.33 | 9.42E-44 | 3.65E-14 | 3.65E-14 | 3.74E-14 | 1.00E+00 | 2.35E-02 | 2.78E-02 |
| 828.08865 | 281.14 | 17.38 | 23.96 | 23.91 | 22.75 | 3.10E-45 | 3.65E-14 | 3.65E-14 | 3.67E-14 | 9.99E-01 | 2.87E-02 | 3.76E-02 |
| 828.25568 | 279.56 | 16.79 | 23.88 | 23.81 | 22.65 | 6.54E-45 | 3.65E-14 | 3.65E-14 | 3.67E-14 | 9.99E-01 | 4.52E-02 | 6.35E-02 |
| 828.42254 | 279.48 | 17.15 | 23.45 | 23.42 | 22.24 | 3.38E-45 | 3.65E-14 | 3.65E-14 | 3.67E-14 | 1.00E+00 | 2.05E-02 | 2.39E-02 |
| 828.55011 | 39.43  | 18.61 | 16.93 | 17.16 | 16.73 | 1.89E-10 | 6.81E-08 | 3.13E-06 | 3.49E-09 | 8.57E-01 | 9.05E-01 | 4.64E-01 |
| 828.58985 | 279.59 | 16.45 | 22.75 | 22.73 | 21.53 | 5.44E-46 | 3.65E-14 | 3.65E-14 | 3.67E-14 | 1.00E+00 | 1.68E-02 | 1.80E-02 |
| 828.59044 | 45.71  | 10.13 | 10.49 | 10.17 | 12.33 | 5.32E-05 | 8.80E-01 | 1.00E+00 | 1.13E-04 | 9.19E-01 | 2.78E-03 | 2.36E-04 |
| 828.75623 | 280.86 | 16.95 | 21.80 | 21.78 | 20.73 | 1.19E-40 | 3.65E-14 | 3.65E-14 | 5.01E-14 | 1.00E+00 | 1.22E-02 | 1.34E-02 |
| 828.9231  | 279.67 | 16.42 | 20.67 | 20.63 | 19.71 | 8.47E-39 | 3.65E-14 | 3.65E-14 | 6.29E-14 | 9.99E-01 | 1.16E-02 | 1.71E-02 |
| 829.09253 | 278.77 | 16.20 | 18.19 | 18.19 | 17.71 | 1.29E-14 | 3.90E-12 | 2.39E-12 | 2.64E-07 | 1.00E+00 | 3.15E-01 | 3.03E-01 |
| 829.26075 | 278.79 | 15.75 | 15.22 | 15.70 | 15.64 | 3.93E-01 | 3.80E-01 | 9.99E-01 | 9.87E-01 | 4.91E-01 | 6.35E-01 | 9.98E-01 |
| 829.55467 | 39.3   | 16.98 | 13.48 | 15.09 | 14.66 | 3.51E-19 | 7.21E-14 | 2.65E-07 | 9.33E-10 | 3.45E-05 | 6.41E-03 | 6.18E-01 |
| 830.42852 | 44.93  | 12.25 | 12.13 | 11.63 | 13.01 | 2.93E-02 | 9.92E-01 | 4.69E-01 | 3.18E-01 | 6.73E-01 | 2.19E-01 | 1.38E-02 |
| 830.5684  | 28.37  | 21.07 | 20.06 | 20.34 | 20.21 | 3.23E-09 | 8.59E-09 | 4.60E-05 | 2.34E-06 | 3.05E-01 | 8.06E-01 | 8.58E-01 |
| 830.91877 | 281.01 | 16.26 | 15.91 | 15.85 | 16.01 | 5.29E-01 | 6.43E-01 | 5.09E-01 | 8.51E-01 | 9.97E-01 | 9.88E-01 | 9.55E-01 |
| 831.57115 | 26.54  | 20.13 | 18.94 | 19.23 | 19.28 | 3.00E-11 | 3.64E-11 | 5.38E-07 | 5.86E-06 | 3.00E-01 | 1.96E-01 | 9.91E-01 |
| 831.90736 | 52.16  | 15.57 | 17.37 | 17.38 | 16.46 | 2.31E-11 | 1.93E-09 | 1.27E-09 | 8.74E-03 | 1.00E+00 | 1.07E-02 | 9.49E-03 |
| 832.43571 | 45.22  | 13.96 | 14.88 | 13.63 | 15.24 | 4.95E-04 | 1.15E-01 | 8.51E-01 | 1.39E-02 | 1.73E-02 | 8.40E-01 | 1.35E-03 |
| 832.58355 | 27.91  | 21.25 | 20.22 | 20.48 | 20.36 | 4.27E-06 | 8.42E-06 | 1.22E-03 | 2.39E-04 | 6.27E-01 | 9.24E-01 | 9.49E-01 |
| 832.90361 | 52.37  | 13.76 | 12.64 | 12.58 | 12.97 | 2.30E-05 | 1.85E-04 | 5.99E-05 | 2.14E-02 | 9.96E-01 | 6.25E-01 | 4.82E-01 |
| 833.01358 | 53.18  | 17.38 | 18.73 | 19.12 | 18.00 | 1.16E-16 | 2.98E-10 | 7.45E-14 | 1.16E-02 | 2.07E-01 | 2.87E-03 | 7.37E-07 |
| 833.46982 | 32.07  | 15.54 | 13.74 | 14.06 | 14.75 | 4.51E-10 | 1.24E-09 | 5.18E-07 | 2.58E-02 | 6.57E-01 | 2.64E-03 | 6.99E-02 |
| 833.58668 | 26.81  | 20.45 | 19.16 | 19.41 | 19.66 | 7.65E-16 | 7.65E-14 | 6.84E-11 | 2.16E-06 | 3.38E-01 | 7.45E-03 | 3.63E-01 |
| 833.90449 | 52.13  | 14.30 | 13.72 | 13.58 | 13.62 | 6.85E-03 | 5.99E-02 | 1.12E-02 | 2.38E-02 | 9.46E-01 | 9.79E-01 | 9.99E-01 |
| 834.01758 | 52.88  | 14.62 | 13.41 | 13.14 | 13.30 | 1.63E-07 | 8.35E-05 | 6.82E-07 | 2.48E-05 | 7.68E-01 | 9.81E-01 | 9.44E-01 |
| 834.14612 | 54.97  | 15.04 | 17.04 | 16.36 | 16.47 | 1.07E-08 | 5.03E-09 | 1.81E-04 | 7.40E-05 | 1.41E-01 | 3.11E-01 | 9.85E-01 |
| 834.24712 | 278.72 | 15.75 | 16.10 | 16.22 | 15.94 | 2.23E-01 | 4.59E-01 | 1.85E-01 | 8.63E-01 | 9.55E-01 | 9.23E-01 | 6.66E-01 |
| 834.42076 | 278.81 | 15.67 | 16.55 | 16.81 | 16.24 | 1.14E-04 | 4.00E-03 | 6.94E-05 | 1.33E-01 | 7.57E-01 | 6.72E-01 | 1.56E-01 |
| 834.42961 | 45.48  | 12.87 | 14.23 | 12.60 | 14.10 | 4.53E-03 | 5.94E-02 | 9.53E-01 | 1.17E-01 | 1.74E-02 | 9.96E-01 | 3.96E-02 |
| 834.58526 | 277.02 | 14.80 | 15.93 | 16.03 | 15.11 | 7.83E-03 | 3.68E-02 | 1.78E-02 | 8.95E-01 | 9.96E-01 | 2.44E-01 | 1.55E-01 |
| 834.59882 | 26.54  | 21.88 | 21.03 | 21.22 | 21.36 | 1.35E-06 | 9.36E-07 | 1.99E-04 | 7.78E-03 | 6.29E-01 | 1.96E-01 | 8.37E-01 |
| 834.75179 | 278.74 | 15.49 | 15.39 | 15.59 | 15.59 | 8.61E-01 | 9.80E-01 | 9.80E-01 | 9.82E-01 | 8.73E-01 | 8.85E-01 | 1.00E+00 |
| 834.91837 | 278.78 | 15.62 | 15.92 | 16.07 | 15.89 | 4.71E-01 | 7.15E-01 | 4.02E-01 | 7.87E-01 | 9.64E-01 | 1.00E+00 | 9.43E-01 |
| 835.01401 | 53.13  | 13.15 | 13.43 | 13.83 | 13.16 | 1.66E-01 | 8.38E-01 | 1.75E-01 | 1.00E+00 | 6.51E-01 | 8.72E-01 | 2.30E-01 |
| 835.2991  | 266.59 | 14.91 | 13.87 | 14.87 | 14.12 | 2.71E-03 | 9.25E-03 | 9.99E-01 | 8.95E-02 | 1.68E-02 | 8.90E-01 | 1.31E-01 |
| 835.42217 | 267.25 | 15.38 | 14.08 | 15.20 | 14.67 | 1.27E-03 | 1.26E-03 | 9.59E-01 | 2.01E-01 | 8.99E-03 | 3.63E-01 | 4.64E-01 |
| 835.5227  | 266.63 | 15.48 | 13.55 | 14.25 | 13.67 | 2.82E-06 | 8.27E-06 | 8.67E-03 | 5.28E-05 | 2.98E-01 | 9.92E-01 | 4.81E-01 |
| 835.60197 | 26.81  | 21.38 | 20.06 | 20.28 | 20.47 | 2.49E-18 | 7.41E-14 | 5.33E-13 | 6.70E-09 | 4.38E-01 | 3.20E-02 | 5.55E-01 |
| 835.64888 | 28.42  | 15.28 | 13.46 | 13.11 | 13.50 | 2.53E-07 | 5.11E-05 | 6.72E-07 | 1.28E-04 | 8.26E-01 | 1.00E+00 | 7.87E-01 |
| 836.01862 | 52.91  | 10.44 | 12.61 | 12.55 | 12.01 | 7.50E-05 | 2.51E-04 | 3.45E-04 | 1.89E-02 | 9.99E-01 | 6.95E-01 | 7.56E-01 |
| 836.5436  | 149.97 | 13.10 | 12.45 | 12.76 | 13.40 | 4.22E-01 | 6.63E-01 | 9.29E-01 | 9.54E-01 | 9.52E-01 | 3.88E-01 | 6.99E-01 |
| 836.61366 | 25.73  | 21.05 | 19.54 | 19.58 | 19.55 | 4.39E-23 | 7.41E-14 | 7.49E-14 | 7.41E-14 | 9.96E-01 | 1.00E+00 | 9.99E-01 |
| 837.54702 | 124.6  | 12.86 | 11.00 | 10.92 | 13.40 | 6.32E-06 | 5.23E-03 | 2.88E-03 | 7.79E-01 | 9.99E-01 | 3.62E-04 | 1.83E-04 |
| 837.61775 | 25.4   | 19.93 | 18.43 | 18.32 | 18.34 | 7.99E-18 | 1.32E-12 | 9.67E-14 | 3.91E-13 | 9.46E-01 | 9.77E-01 | 9.99E-01 |
| 838.55764 | 128.46 | 12.53 | 12.42 | 11.84 | 12.87 | 3.75E-01 | 9.97E-01 | 6.03E-01 | 9.37E-01 | 7.49E-01 | 8.75E-01 | 3.07E-01 |
| 838.62893 | 28.25  | 19.57 | 16.82 | 16.89 | 16.83 | 1.62E-33 | 3.72E-14 | 3.76E-14 | 3.87E-14 | 9.88E-01 | 1.00E+00 | 9.95E-01 |
| 839.0208  | 53.4   | 15.92 | 17.82 | 17.48 | 16.76 | 1.49E-18 | 7.54E-14 | 8.59E-13 | 3.10E-04 | 3.40E-01 | 6.47E-06 | 4.06E-03 |
| 839.63368 | 25.25  | 18.30 | 13.81 | 13.74 | 14.37 | 4.06E-28 | 5.36E-14 | 4.70E-14 | 7.56E-14 | 9.98E-01 | 5.50E-01 | 4.34E-01 |
| 840.0229  | 53.12  | 11.46 | 14.60 | 13.93 | 13.02 | 1.69E-10 | 1.98E-10 | 5.31E-07 | 4.96E-03 | 4.58E-01 | 5.48E-03 | 2.19E-01 |
| 840.46407 | 45.29  | 12.23 | 14.81 | 13.50 | 14.59 | 1.22E-11 | 1.31E-10 | 3.00E-03 | 1.02E-08 | 3.23E-03 | 9.41E-01 | 2.58E-02 |
| 840.639   | 34     | 15.39 | 8.00  | 7.67  | 10.08 | 1.08E-31 | 3.76E-14 | 3.65E-14 | 8.58E-14 | 9.52E-01 | 7.41E-03 | 1.12E-03 |
| 841.02438 | 53.18  | 12.30 | 16.67 | 16.01 | 14.45 | 7.06E-11 | 2.64E-10 | 6.53E-08 | 5.73E-03 | 7.35E-01 | 5.58E-03 | 8.85E-02 |
| 842.46331 | 45.74  | 13.59 | 15.46 | 14.59 | 15.06 | 2.65E-09 | 2.01E-09 | 2.60E-03 | 6.28E-06 | 1.64E-02 | 5.34E-01 | 4.06E-01 |
| 844.25029 | 278.59 | 15.57 | 16.41 | 16.25 | 15.68 | 5.48E-04 | 1.95E-03 | 1.73E-02 | 9.67E-01 | 9.06E-01 | 1.66E-02 | 9.02E-02 |
| 844.41488 | 278.55 | 15.06 | 16.87 | 16.61 | 15.39 | 4.67E-12 | 6.97E-10 | 1.08E-07 | 6.31E-01 | 7.75E-01 | 2.30E-06 | 1.24E-04 |
| 844.52417 | 39.15  | 18.36 | 19.17 | 19.87 | 19.00 | 1.44E-08 | 3.17E-03 | 1.62E-09 | 3.70E-02 | 1.64E-02 | 9.04E-01 | 2.19E-03 |
| 844.57895 | 278.53 | 15.19 | 18.02 | 17.74 | 16.35 | 2.44E-14 | 1.31E-12 | 9.04E-11 | 1.12E-02 | 8.74E-01 | 1.10E-04 | 1.69E-03 |
| 844.75087 | 278.58 | 15.87 | 16.35 | 16.30 | 15.92 | 1.41E-01 | 2.35E-01 | 3.11E-01 | 9.97E-01 | 9.98E-01 | 3.85E-01 | 4.79E-01 |
| 844.919   | 277.96 | 15.51 | 15.79 | 15.91 | 16.03 | 4.83E-01 | 8.38E-01 | 6.30E-01 | 4.51E-01 | 9.86E-01 | 9.16E-01 | 9.89E-01 |
| 845.52782 | 39.84  | 17.45 | 17.75 | 18.64 | 18.33 | 8.61E-10 | 3.53E-01 | 2.72E-09 | 3.06E-05 | 2.69E-05 | 1.73E-02 | 3.86E-01 |

|           |        |       |       |       |       |          |          |          |          |          |          |          |
|-----------|--------|-------|-------|-------|-------|----------|----------|----------|----------|----------|----------|----------|
| 845.86881 | 264.42 | 14.73 | 14.60 | 15.50 | 14.75 | 1.66E-01 | 9.90E-01 | 2.72E-01 | 1.00E+00 | 1.74E-01 | 9.89E-01 | 3.40E-01 |
| 845.9679  | 263.18 | 15.47 | 14.54 | 14.97 | 14.74 | 8.83E-02 | 6.84E-02 | 5.34E-01 | 2.40E-01 | 6.88E-01 | 9.57E-01 | 9.42E-01 |
| 846.06697 | 264.61 | 15.73 | 14.67 | 15.31 | 14.84 | 1.58E-02 | 1.58E-02 | 6.43E-01 | 7.48E-02 | 2.80E-01 | 9.64E-01 | 5.87E-01 |
| 846.16608 | 262.96 | 14.77 | 14.58 | 15.00 | 14.46 | 4.94E-01 | 9.55E-01 | 9.10E-01 | 8.30E-01 | 6.59E-01 | 9.87E-01 | 4.64E-01 |
| 846.54027 | 40.27  | 17.30 | 17.56 | 17.97 | 17.17 | 2.35E-03 | 6.18E-01 | 9.67E-03 | 9.39E-01 | 2.44E-01 | 3.23E-01 | 2.68E-03 |
| 847.00577 | 52.76  | 12.81 | 12.24 | 11.88 | 12.57 | 1.58E-02 | 2.30E-01 | 1.10E-02 | 8.72E-01 | 6.54E-01 | 7.14E-01 | 1.27E-01 |
| 847.54507 | 40.69  | 14.07 | 13.84 | 14.36 | 13.52 | 4.98E-01 | 9.73E-01 | 9.47E-01 | 7.44E-01 | 7.77E-01 | 9.41E-01 | 4.37E-01 |
| 847.87976 | 51.78  | 14.41 | 13.53 | 13.77 | 12.85 | 3.31E-05 | 2.21E-02 | 1.56E-01 | 8.08E-06 | 8.61E-01 | 1.60E-01 | 2.30E-02 |
| 848.40689 | 67.42  | 10.25 | 11.97 | 12.48 | 11.93 | 1.44E-04 | 5.66E-03 | 1.17E-04 | 9.90E-03 | 7.67E-01 | 1.00E+00 | 7.32E-01 |
| 848.555   | 41.01  | 17.83 | 17.25 | 17.71 | 16.86 | 1.90E-03 | 1.30E-01 | 9.70E-01 | 2.45E-03 | 3.26E-01 | 5.03E-01 | 1.29E-02 |
| 848.98604 | 53.51  | 14.53 | 12.19 | 13.05 | 11.67 | 2.39E-06 | 1.32E-04 | 3.11E-02 | 3.29E-06 | 4.08E-01 | 7.99E-01 | 7.38E-02 |
| 849.5485  | 44.42  | 14.02 | 11.23 | 11.67 | 12.25 | 7.30E-07 | 1.03E-06 | 4.58E-05 | 5.51E-03 | 8.35E-01 | 2.45E-01 | 7.13E-01 |
| 849.56465 | 41.12  | 16.00 | 13.65 | 14.75 | 14.22 | 5.29E-11 | 2.96E-11 | 7.12E-04 | 1.23E-06 | 5.14E-03 | 3.25E-01 | 4.06E-01 |
| 849.87121 | 51.75  | 14.28 | 12.49 | 12.43 | 11.60 | 5.67E-14 | 2.34E-07 | 5.60E-08 | 1.29E-13 | 9.97E-01 | 3.76E-02 | 6.11E-02 |
| 850.49229 | 45.2   | 14.49 | 14.07 | 13.29 | 13.92 | 1.07E-03 | 4.87E-01 | 3.35E-04 | 2.45E-01 | 5.14E-02 | 9.66E-01 | 1.75E-01 |
| 852.48897 | 45.29  | 12.55 | 12.46 | 11.68 | 12.74 | 1.45E-02 | 9.93E-01 | 4.49E-02 | 9.48E-01 | 1.06E-01 | 8.61E-01 | 1.51E-02 |
| 852.55357 | 35.39  | 15.99 | 10.17 | 12.17 | 12.52 | 1.37E-21 | 5.61E-14 | 1.95E-11 | 3.80E-09 | 1.38E-03 | 1.91E-04 | 9.20E-01 |
| 854.56784 | 25.79  | 19.25 | 18.03 | 18.37 | 18.34 | 7.57E-09 | 6.49E-09 | 4.11E-05 | 4.31E-05 | 2.93E-01 | 4.02E-01 | 9.99E-01 |
| 854.99491 | 52.85  | 16.60 | 18.67 | 18.91 | 17.37 | 2.15E-16 | 1.15E-11 | 1.09E-13 | 3.75E-02 | 8.40E-01 | 8.49E-05 | 1.81E-06 |
| 855.57123 | 25.06  | 18.37 | 15.97 | 17.03 | 16.94 | 8.93E-13 | 1.69E-13 | 3.25E-05 | 1.70E-05 | 2.71E-03 | 1.07E-02 | 9.91E-01 |
| 855.99518 | 52.76  | 13.82 | 12.57 | 13.04 | 12.68 | 5.99E-05 | 9.97E-05 | 3.07E-02 | 7.03E-04 | 3.73E-01 | 9.84E-01 | 6.21E-01 |
| 856.45558 | 48.83  | 9.56  | 10.16 | 8.75  | 9.78  | 7.96E-02 | 6.71E-01 | 4.31E-01 | 9.78E-01 | 5.27E-02 | 9.06E-01 | 2.65E-01 |
| 856.58235 | 27.1   | 17.76 | 14.58 | 15.82 | 15.08 | 5.75E-12 | 1.48E-11 | 4.72E-05 | 2.71E-08 | 2.64E-02 | 6.96E-01 | 3.50E-01 |
| 856.99086 | 52.88  | 14.18 | 13.48 | 13.61 | 13.20 | 3.08E-04 | 1.06E-02 | 5.09E-02 | 1.69E-04 | 9.44E-01 | 6.37E-01 | 3.06E-01 |
| 857.07298 | 263.05 | 12.63 | 14.50 | 14.55 | 14.35 | 1.62E-03 | 6.57E-03 | 4.43E-03 | 1.93E-02 | 1.00E+00 | 9.94E-01 | 9.86E-01 |
| 857.16257 | 266.07 | 15.45 | 13.58 | 14.68 | 13.94 | 5.24E-06 | 5.84E-06 | 1.59E-01 | 5.80E-04 | 2.16E-02 | 7.96E-01 | 2.32E-01 |
| 857.25668 | 264.75 | 14.42 | 13.53 | 14.40 | 13.65 | 5.24E-03 | 2.52E-02 | 1.00E+00 | 7.87E-02 | 3.41E-02 | 9.85E-01 | 9.83E-02 |
| 857.27199 | 268.84 | 16.07 | 16.62 | 16.33 | 16.56 | 2.83E-01 | 2.81E-01 | 8.28E-01 | 4.14E-01 | 7.94E-01 | 9.97E-01 | 8.97E-01 |
| 857.37479 | 270.27 | 16.37 | 15.64 | 15.59 | 16.11 | 2.47E-02 | 6.76E-02 | 3.89E-02 | 8.23E-01 | 9.98E-01 | 4.43E-01 | 3.33E-01 |
| 857.47248 | 270.47 | 16.15 | 16.08 | 16.16 | 16.25 | 9.57E-01 | 9.93E-01 | 1.00E+00 | 9.88E-01 | 9.91E-01 | 9.42E-01 | 9.92E-01 |
| 857.57809 | 263.4  | 12.62 | 14.50 | 15.68 | 14.83 | 6.50E-08 | 1.35E-03 | 2.43E-08 | 1.65E-04 | 1.06E-01 | 9.27E-01 | 3.80E-01 |
| 857.58615 | 24.83  | 15.86 | 11.34 | 11.74 | 12.47 | 1.88E-17 | 7.54E-14 | 2.47E-13 | 3.92E-09 | 8.73E-01 | 1.60E-01 | 5.22E-01 |
| 857.67297 | 267.04 | 15.84 | 15.94 | 15.74 | 16.19 | 5.69E-01 | 9.90E-01 | 9.88E-01 | 6.96E-01 | 9.25E-01 | 8.71E-01 | 5.17E-01 |
| 857.77243 | 264.74 | 16.12 | 14.44 | 15.25 | 15.06 | 8.76E-06 | 2.05E-06 | 3.41E-02 | 7.52E-03 | 6.41E-02 | 2.64E-01 | 9.36E-01 |
| 857.87357 | 263.06 | 14.35 | 14.44 | 15.73 | 14.84 | 3.18E-03 | 9.96E-01 | 3.42E-03 | 6.24E-01 | 1.03E-02 | 7.75E-01 | 1.56E-01 |
| 857.99506 | 52.7   | 13.26 | 12.18 | 11.95 | 12.10 | 8.04E-05 | 3.34E-03 | 1.66E-04 | 1.71E-03 | 8.83E-01 | 9.93E-01 | 9.71E-01 |
| 858.59892 | 24.86  | 17.73 | 14.65 | 15.70 | 15.92 | 6.51E-20 | 6.78E-14 | 1.45E-10 | 3.25E-08 | 2.84E-03 | 3.22E-04 | 8.95E-01 |
| 859.60568 | 24.39  | 15.70 | 11.51 | 12.25 | 13.45 | 2.94E-22 | 6.54E-14 | 7.44E-14 | 3.30E-07 | 2.57E-01 | 2.63E-05 | 1.84E-02 |
| 860.61534 | 24.64  | 16.85 | 12.68 | 13.16 | 13.76 | 3.44E-25 | 5.18E-14 | 7.41E-14 | 2.77E-13 | 5.83E-01 | 3.18E-02 | 4.14E-01 |
| 861.00879 | 53.36  | 16.38 | 18.78 | 18.38 | 17.47 | 1.03E-17 | 7.39E-14 | 1.65E-12 | 3.41E-04 | 4.52E-01 | 2.21E-05 | 5.34E-03 |
| 861.6181  | 24.8   | 16.28 | 10.16 | 11.06 | 11.50 | 3.09E-44 | 3.65E-14 | 3.65E-14 | 3.67E-14 | 7.49E-02 | 3.42E-03 | 6.68E-01 |
| 862.009   | 53.31  | 13.25 | 13.64 | 13.11 | 13.46 | 2.92E-01 | 5.15E-01 | 9.60E-01 | 8.90E-01 | 2.66E-01 | 9.31E-01 | 6.47E-01 |
| 862.6301  | 25.45  | 17.14 | 12.05 | 12.81 | 12.87 | 1.44E-26 | 4.47E-14 | 7.37E-14 | 7.44E-14 | 3.25E-01 | 2.91E-01 | 9.99E-01 |
| 862.99816 | 53.18  | 14.34 | 14.15 | 13.50 | 13.68 | 8.36E-04 | 8.27E-01 | 1.35E-03 | 2.51E-02 | 3.01E-02 | 2.12E-01 | 8.78E-01 |
| 865.20352 | 64.61  | 13.62 | 13.89 | 13.22 | 13.67 | 2.50E-01 | 8.42E-01 | 5.94E-01 | 9.99E-01 | 1.84E-01 | 9.14E-01 | 5.58E-01 |
| 870.96982 | 52.81  | 14.90 | 12.67 | 13.42 | 12.63 | 9.94E-13 | 8.45E-11 | 1.80E-05 | 1.26E-10 | 9.48E-02 | 1.00E+00 | 8.33E-02 |
| 871.43221 | 278.95 | 13.07 | 15.92 | 16.40 | 14.96 | 3.40E-15 | 5.93E-11 | 9.55E-14 | 3.40E-05 | 6.34E-01 | 1.05E-01 | 3.53E-03 |
| 871.59104 | 279.23 | 15.54 | 16.26 | 16.24 | 15.56 | 6.34E-03 | 3.99E-02 | 4.46E-02 | 1.00E+00 | 1.00E+00 | 7.08E-02 | 7.84E-02 |
| 872.55854 | 42.43  | 14.71 | 13.22 | 13.43 | 13.87 | 2.27E-04 | 2.76E-04 | 2.03E-03 | 1.05E-01 | 9.47E-01 | 3.23E-01 | 6.36E-01 |
| 876.97859 | 52.75  | 15.59 | 16.06 | 16.26 | 15.00 | 5.52E-08 | 9.72E-02 | 5.54E-03 | 2.76E-02 | 7.72E-01 | 1.04E-05 | 8.55E-08 |
| 877.97626 | 52.58  | 13.73 | 12.10 | 12.87 | 12.47 | 1.20E-06 | 7.15E-07 | 1.96E-02 | 3.09E-04 | 6.08E-02 | 6.44E-01 | 5.85E-01 |
| 878.56865 | 25.85  | 17.51 | 14.40 | 16.16 | 16.89 | 3.26E-21 | 6.36E-14 | 2.21E-05 | 1.54E-01 | 5.17E-08 | 2.04E-13 | 7.68E-02 |
| 878.97556 | 52.73  | 13.48 | 13.34 | 13.43 | 13.19 | 7.66E-01 | 9.60E-01 | 9.98E-01 | 7.35E-01 | 9.90E-01 | 9.53E-01 | 8.43E-01 |
| 879.39193 | 273.47 | 14.98 | 14.80 | 15.72 | 15.42 | 2.27E-02 | 9.38E-01 | 9.02E-02 | 5.36E-01 | 2.53E-02 | 2.53E-01 | 8.03E-01 |
| 879.57161 | 24.27  | 16.42 | 9.17  | 13.46 | 14.24 | 1.28E-39 | 3.65E-14 | 1.88E-10 | 8.46E-06 | 7.46E-14 | 5.36E-14 | 2.99E-01 |
| 879.64039 | 274.37 | 16.06 | 14.64 | 15.53 | 15.03 | 3.45E-04 | 2.28E-04 | 4.02E-01 | 1.71E-02 | 5.02E-02 | 7.01E-01 | 4.81E-01 |
| 879.88205 | 273.99 | 15.27 | 14.74 | 15.66 | 14.89 | 3.17E-02 | 3.66E-01 | 6.08E-01 | 6.64E-01 | 3.01E-02 | 9.73E-01 | 1.07E-01 |
| 880.58043 | 32.32  | 15.44 | 10.41 | 11.10 | 13.15 | 4.34E-19 | 7.52E-14 | 1.36E-13 | 1.98E-04 | 5.77E-01 | 1.07E-05 | 1.54E-03 |
| 882.98806 | 53.32  | 16.28 | 18.38 | 17.79 | 16.91 | 3.14E-09 | 4.61E-09 | 3.19E-05 | 2.33E-01 | 2.90E-01 | 1.94E-04 | 5.58E-02 |
| 883.99077 | 53.19  | 13.75 | 12.45 | 12.15 | 12.40 | 1.21E-08 | 1.50E-05 | 4.12E-08 | 1.09E-05 | 6.82E-01 | 9.98E-01 | 8.07E-01 |
| 884.98272 | 53.38  | 13.76 | 13.12 | 12.48 | 12.88 | 1.29E-06 | 3.23E-02 | 3.63E-07 | 1.47E-03 | 3.36E-02 | 7.49E-01 | 3.47E-01 |
| 885.66106 | 30.27  | 12.78 | 10.36 | 10.63 | 11.22 | 1.21E-04 | 1.86E-04 | 1.02E-03 | 4.03E-02 | 9.68E-01 | 4.87E-01 | 7.58E-01 |
| 887.18075 | 64.11  | 10.56 | 10.98 | 9.64  | 9.49  | 2.07E-03 | 7.73E-01 | 1.35E-01 | 7.21E-02 | 1.42E-02 | 6.72E-03 | 9.86E-01 |
| 892.9572  | 52.61  | 14.80 | 12.39 | 13.26 | 12.53 | 3.39E-14 | 1.07E-12 | 5.21E-06 | 4.77E-11 | 2.99E-02 | 9.75E-01 | 1.04E-01 |
| 898.0916  | 55.08  | 14.13 | 14.51 | 13.09 | 14.58 | 9.24E-04 | 7.62E-01 | 3.96E-02 | 6.68E-01 | 2.69E-03 | 9.98E-01 | 1.94E-03 |
| 898.96373 | 52.66  | 15.02 | 15.09 | 15.04 | 14.24 | 1.09E-03 | 9.86E-01 | 9.99E-01 | 5.28E-03 | 9.97E-01 | 2.47E-03 | 4.53E-03 |
| 900.95289 | 52.72  | 13.30 | 12.34 | 12.51 | 12.15 | 6.62E-04 | 6.10E-03 | 3.06E-02 | 8.31E-04 | 9.48E-01 | 9.23E-01 | 6.50E-01 |
| 904.96722 | 53.45  | 15.54 | 16.82 | 15.78 | 15.82 | 4.21E-08 | 3.45E-08 | 6.58E-01 | 5.51E-01 | 1.70E-05 | 8.14E-05 | 9.97E-01 |

|            |        |       |       |       |       |          |          |          |          |          |          |          |
|------------|--------|-------|-------|-------|-------|----------|----------|----------|----------|----------|----------|----------|
| 914.92929  | 52.48  | 13.65 | 11.86 | 12.65 | 11.24 | 8.33E-11 | 9.83E-07 | 1.36E-02 | 1.08E-10 | 9.44E-02 | 2.94E-01 | 4.08E-04 |
| 920.06842  | 53.47  | 13.66 | 13.45 | 13.09 | 13.55 | 1.77E-02 | 6.91E-01 | 1.16E-02 | 9.47E-01 | 2.19E-01 | 9.57E-01 | 8.15E-02 |
| 920.94168  | 52.87  | 14.65 | 14.60 | 14.28 | 13.82 | 2.09E-03 | 9.96E-01 | 3.59E-01 | 2.35E-03 | 5.22E-01 | 6.99E-03 | 2.08E-01 |
| 942.04918  | 53.11  | 13.21 | 13.28 | 12.80 | 13.11 | 1.06E-01 | 9.83E-01 | 1.81E-01 | 9.68E-01 | 9.69E-02 | 8.58E-01 | 4.61E-01 |
| 952.41247  | 263.44 | 15.06 | 14.73 | 15.90 | 14.85 | 3.20E-03 | 7.52E-01 | 5.16E-02 | 9.31E-01 | 3.55E-03 | 9.84E-01 | 1.49E-02 |
| 952.52688  | 263.93 | 14.06 | 14.46 | 15.45 | 14.47 | 1.93E-04 | 5.72E-01 | 7.33E-05 | 5.73E-01 | 1.29E-02 | 1.00E+00 | 1.78E-02 |
| 952.6334   | 264.32 | 11.13 | 15.04 | 15.90 | 13.91 | 4.27E-19 | 4.35E-13 | 7.56E-14 | 4.70E-07 | 3.19E-01 | 1.29E-01 | 7.84E-04 |
| 952.74795  | 262.55 | 13.51 | 14.33 | 15.36 | 14.27 | 1.30E-05 | 9.81E-02 | 2.21E-06 | 1.64E-01 | 2.74E-02 | 9.98E-01 | 2.03E-02 |
| 961.20977  | 213.47 | 13.20 | 12.69 | 12.74 | 12.96 | 1.66E-02 | 2.01E-02 | 4.42E-02 | 5.33E-01 | 9.91E-01 | 4.70E-01 | 6.47E-01 |
| 964.03146  | 53.05  | 12.90 | 12.91 | 12.14 | 12.40 | 1.72E-04 | 1.00E+00 | 9.51E-04 | 7.21E-02 | 1.12E-03 | 7.12E-02 | 6.11E-01 |
| 986.01065  | 52.92  | 11.96 | 11.72 | 10.67 | 11.25 | 5.86E-08 | 6.92E-01 | 5.58E-08 | 8.70E-03 | 2.65E-05 | 1.70E-01 | 6.08E-02 |
| 993.30534  | 278.47 | 14.95 | 15.93 | 16.19 | 15.36 | 9.90E-08 | 6.91E-05 | 2.04E-07 | 2.75E-01 | 6.56E-01 | 6.46E-02 | 1.95E-03 |
| 993.50282  | 278.77 | 15.23 | 16.40 | 16.42 | 16.20 | 1.65E-05 | 1.27E-04 | 8.20E-05 | 3.36E-03 | 1.00E+00 | 8.87E-01 | 8.59E-01 |
| 993.70458  | 278.59 | 14.93 | 16.33 | 16.43 | 15.41 | 1.68E-11 | 2.03E-08 | 1.07E-09 | 1.76E-01 | 9.68E-01 | 9.25E-04 | 1.39E-04 |
| 993.90221  | 278.51 | 15.45 | 15.68 | 15.70 | 15.57 | 7.90E-01 | 8.35E-01 | 7.99E-01 | 9.75E-01 | 1.00E+00 | 9.80E-01 | 9.70E-01 |
| 1059.84161 | 65.16  | 13.95 | 12.27 | 11.74 | 11.83 | 7.87E-22 | 4.88E-12 | 7.39E-14 | 7.29E-14 | 9.92E-02 | 2.54E-01 | 9.80E-01 |
| 1274.13292 | 31.99  | 15.53 | 15.04 | 13.15 | 13.76 | 2.24E-21 | 1.68E-01 | 7.33E-14 | 3.42E-11 | 1.65E-12 | 4.17E-06 | 7.19E-02 |
| 1274.16928 | 31.93  | 15.85 | 15.58 | 14.99 | 15.01 | 6.35E-12 | 1.62E-01 | 1.02E-09 | 7.95E-09 | 8.10E-05 | 2.53E-04 | 9.99E-01 |
