# Supplementary material
Source: PubMed Central journal article supplement (PMC9062885)
Supplement: NIHMS1790332-supplement-Table_S2.pdf [file NIHMS1790332-supplement-Table_S2.pdf]

Supplemental Table 2

Nellis et al, Lung metabolome of 1,3-butadiene exposed Collaborative Cross mice reflects metabolic phenotype of human lung cancer

High resolution metabolomics analysis of lung from collaborative-cross mice exposed to butadiene

One-way Anova Results\*, C18/ESI- data

\*values reported for data that was log<sub>2</sub>- transformed and quantile-normalized

| mz       | time   | mean -<br>Ctrl | mean -<br>2ppm | mean -<br>20ppm | mean -<br>200ppm | fdr_pvalue | p-value,<br>Ctrl vs<br>2ppm | p-value,<br>Ctrl vs<br>20ppm | p-value,<br>Ctrl vs<br>200ppm | p-value,<br>2ppm vs<br>20ppm | p-value,<br>2ppm vs<br>200ppm | p-value,<br>20ppm vs<br>200ppm |
|----------|--------|----------------|----------------|-----------------|------------------|------------|-----------------------------|------------------------------|-------------------------------|------------------------------|-------------------------------|--------------------------------|
| 85.02942 | 20.84  | 20.46          | 20.74          | 20.87           | 20.93            | 1.65E-15   | 4.40E-06                    | 3.56E-12                     | 1.03E-13                      | 7.27E-02                     | 7.14E-03                      | 8.04E-01                       |
| 86.02458 | 194.65 | 16.66          | 13.86          | 13.42           | 14.42            | 1.22E-18   | 1.99E-13                    | 4.36E-14                     | 6.90E-09                      | 5.79E-01                     | 4.10E-01                      | 2.77E-02                       |
| 86.05129 | 26.23  | 16.00          | 15.54          | 15.42           | 14.81            | 2.58E-08   | 4.64E-02                    | 6.42E-03                     | 2.76E-09                      | 9.24E-01                     | 8.33E-04                      | 6.41E-03                       |
| 87.0086  | 254.2  | 18.04          | 17.44          | 17.62           | 17.88            | 7.24E-08   | 9.21E-08                    | 2.61E-04                     | 4.02E-01                      | 3.18E-01                     | 4.11E-04                      | 7.82E-02                       |
| 87.00871 | 23.09  | 21.21          | 21.58          | 21.69           | 21.50            | 1.50E-17   | 2.01E-11                    | 4.40E-14                     | 4.67E-07                      | 1.78E-01                     | 3.91E-01                      | 2.36E-03                       |
| 87.0271  | 131.43 | 14.90          | 14.12          | 14.03           | 14.12            | 1.52E-13   | 1.20E-09                    | 9.05E-12                     | 3.34E-09                      | 8.78E-01                     | 1.00E+00                      | 8.81E-01                       |
| 87.02718 | 21.58  | 17.71          | 16.87          | 16.91           | 16.59            | 4.82E-09   | 1.15E-05                    | 2.43E-05                     | 6.92E-09                      | 9.97E-01                     | 4.10E-01                      | 2.93E-01                       |
| 87.04495 | 169.19 | 15.88          | 15.23          | 15.25           | 15.64            | 1.98E-06   | 2.05E-05                    | 3.25E-05                     | 3.22E-01                      | 9.99E-01                     | 2.43E-02                      | 3.37E-02                       |
| 87.21031 | 209.84 | 12.01          | 12.00          | 12.44           | 12.87            | 4.22E-04   | 1.00E+00                    | 2.12E-01                     | 1.03E-03                      | 2.18E-01                     | 1.31E-03                      | 2.33E-01                       |
| 88.00382 | 290.46 | 13.47          | 15.61          | 15.45           | 16.41            | 7.97E-21   | 1.19E-12                    | 2.75E-11                     | 3.83E-14                      | 9.39E-01                     | 2.89E-02                      | 4.76E-03                       |
| 88.00384 | 163.35 | 15.02          | 14.77          | 14.90           | 14.89            | 4.47E-01   | 3.54E-01                    | 8.52E-01                     | 8.30E-01                      | 8.39E-01                     | 8.83E-01                      | 1.00E+00                       |
| 88.01199 | 124.36 | 14.80          | 14.60          | 14.88           | 14.98            | 5.12E-02   | 4.59E-01                    | 9.17E-01                     | 5.26E-01                      | 1.68E-01                     | 3.59E-02                      | 8.88E-01                       |
| 88.0121  | 19.52  | 15.68          | 15.86          | 15.89           | 15.64            | 6.53E-03   | 1.37E-01                    | 4.33E-02                     | 9.83E-01                      | 9.70E-01                     | 7.79E-02                      | 2.34E-02                       |
| 88.04022 | 263    | 17.52          | 17.52          | 18.01           | 17.76            | 3.57E-07   | 1.00E+00                    | 2.13E-06                     | 6.58E-02                      | 4.62E-06                     | 7.94E-02                      | 5.68E-02                       |
| 88.04036 | 24.85  | 21.62          | 21.64          | 21.76           | 21.73            | 1.09E-01   | 9.92E-01                    | 1.47E-01                     | 3.57E-01                      | 2.84E-01                     | 5.49E-01                      | 9.78E-01                       |
| 88.16903 | 254.81 | 14.30          | 13.79          | 13.95           | 14.23            | 2.42E-01   | 2.61E-01                    | 5.89E-01                     | 9.96E-01                      | 9.41E-01                     | 4.29E-01                      | 7.65E-01                       |
| 89.01433 | 291.73 | 17.69          | 14.96          | 15.19           | 15.43            | 3.94E-19   | 4.23E-14                    | 5.81E-14                     | 1.24E-11                      | 8.71E-01                     | 4.36E-01                      | 8.66E-01                       |
| 89.02431 | 151.56 | 24.17          | 27.21          | 26.91           | 26.76            | 2.39E-16   | 7.99E-14                    | 3.75E-12                     | 2.00E-10                      | 8.57E-01                     | 6.54E-01                      | 9.79E-01                       |
| 89.02432 | 279.64 | 22.97          | 24.80          | 24.85           | 24.68            | 1.98E-38   | 5.11E-15                    | 5.11E-15                     | 5.77E-15                      | 9.87E-01                     | 8.17E-01                      | 6.18E-01                       |
| 89.04263 | 185.87 | 17.29          | 17.07          | 17.20           | 17.06            | 2.69E-01   | 3.36E-01                    | 9.12E-01                     | 3.51E-01                      | 7.45E-01                     | 1.00E+00                      | 7.51E-01                       |
| 89.23163 | 226    | 14.68          | 10.02          | 9.80            | 10.31            | 3.53E-101  | 5.11E-15                    | 5.11E-15                     | 5.11E-15                      | 4.06E-01                     | 2.00E-01                      | 3.03E-03                       |
| 90.00954 | 296.14 | 18.74          | 16.86          | 16.87           | 16.82            | 1.17E-35   | 5.11E-15                    | 5.11E-15                     | 5.33E-15                      | 1.00E+00                     | 9.91E-01                      | 9.89E-01                       |
| 90.00969 | 93.57  | 16.06          | 13.82          | 14.34           | 14.80            | 3.26E-45   | 5.11E-15                    | 5.11E-15                     | 4.35E-14                      | 3.50E-04                     | 1.08E-11                      | 2.64E-03                       |
| 90.01864 | 288.56 | 16.71          | 17.56          | 17.85           | 17.22            | 9.42E-14   | 2.66E-08                    | 1.10E-13                     | 2.33E-03                      | 1.68E-01                     | 9.98E-02                      | 1.27E-04                       |
| 90.02763 | 147.35 | 21.50          | 22.77          | 22.70           | 22.50            | 7.85E-14   | 5.36E-12                    | 4.57E-11                     | 1.29E-07                      | 9.76E-01                     | 4.13E-01                      | 6.58E-01                       |
| 90.02774 | 19.13  | 21.69          | 21.91          | 21.97           | 21.80            | 3.25E-03   | 2.62E-02                    | 2.89E-03                     | 5.01E-01                      | 9.15E-01                     | 5.52E-01                      | 2.05E-01                       |
| 90.03049 | 137.49 | 14.39          | 13.82          | 13.86           | 14.07            | 9.52E-04   | 1.58E-03                    | 3.43E-03                     | 1.66E-01                      | 9.95E-01                     | 4.48E-01                      | 5.91E-01                       |
| 90.8111  | 220.84 | 12.62          | 13.49          | 13.14           | 13.47            | 1.16E-09   | 1.36E-08                    | 1.18E-03                     | 6.96E-08                      | 7.12E-02                     | 9.99E-01                      | 1.15E-01                       |
| 90.93574 | 92.57  | 15.96          | 15.51          | 15.52           | 15.60            | 4.63E-07   | 3.54E-06                    | 7.24E-06                     | 5.23E-04                      | 9.97E-01                     | 7.51E-01                      | 8.47E-01                       |
| 91.02189 | 208.27 | 15.67          | 15.18          | 14.45           | 14.57            | 1.71E-04   | 3.65E-01                    | 3.18E-04                     | 2.30E-03                      | 8.01E-02                     | 2.11E-01                      | 9.82E-01                       |
| 91.03002 | 266.14 | 21.32          | 18.67          | 19.06           | 19.02            | 7.71E-53   | 5.11E-15                    | 5.11E-15                     | 5.11E-15                      | 3.19E-02                     | 8.72E-02                      | 9.90E-01                       |
| 91.03099 | 28.07  | 18.07          | 18.55          | 18.50           | 18.24            | 5.04E-02   | 6.65E-02                    | 1.19E-01                     | 8.41E-01                      | 9.94E-01                     | 4.14E-01                      | 5.65E-01                       |
| 91.0503  | 142.11 | 14.11          | 12.91          | 12.66           | 13.22            | 3.01E-16   | 2.75E-11                    | 4.31E-14                     | 1.77E-06                      | 4.21E-01                     | 2.78E-01                      | 6.06E-03                       |
| 91.05838 | 179.98 | 15.46          | 15.40          | 15.56           | 14.90            | 5.69E-06   | 9.68E-01                    | 8.41E-01                     | 1.21E-04                      | 5.94E-01                     | 1.07E-03                      | 5.42E-06                       |
| 92.02525 | 273.39 | 21.06          | 19.12          | 19.51           | 19.51            | 3.02E-24   | 2.18E-14                    | 4.24E-14                     | 4.66E-14                      | 1.30E-01                     | 1.51E-01                      | 1.00E+00                       |
| 92.02546 | 22.19  | 19.72          | 18.09          | 18.14           | 18.69            | 1.75E-30   | 5.77E-15                    | 6.66E-15                     | 3.40E-12                      | 9.78E-01                     | 1.31E-04                      | 5.40E-04                       |
| 92.03446 | 27.62  | 24.42          | 24.32          | 24.29           | 23.93            | 1.62E-02   | 9.15E-01                    | 8.17E-01                     | 1.01E-02                      | 9.97E-01                     | 7.18E-02                      | 1.11E-01                       |
| 92.4971  | 203    | 10.26          | 12.43          | 12.82           | 12.65            | 1.24E-19   | 9.43E-13                    | 4.22E-14                     | 6.91E-14                      | 5.06E-01                     | 8.76E-01                      | 9.32E-01                       |
| 92.92799 | 21.48  | 21.62          | 20.86          | 20.85           | 21.29            | 4.05E-05   | 2.84E-04                    | 1.76E-04                     | 2.88E-01                      | 1.00E+00                     | 1.26E-01                      | 1.03E-01                       |
| 92.93277 | 98.31  | 13.68          | 13.18          | 13.08           | 13.23            | 1.33E-01   | 2.70E-01                    | 1.23E-01                     | 3.88E-01                      | 9.82E-01                     | 9.98E-01                      | 9.49E-01                       |
| 93.00923 | 291.62 | 17.67          | 16.37          | 16.60           | 16.43            | 3.42E-26   | 2.33E-14                    | 4.27E-14                     | 4.02E-14                      | 2.29E-01                     | 9.65E-01                      | 5.11E-01                       |
| 93.00933 | 16.84  | 16.28          | 13.92          | 13.96           | 14.34            | 3.52E-47   | 5.11E-15                    | 5.11E-15                     | 5.11E-15                      | 9.93E-01                     | 3.01E-02                      | 5.70E-02                       |
| 93.03439 | 287.01 | 16.62          | 16.86          | 16.38           | 16.45            | 3.33E-02   | 5.00E-01                    | 4.61E-01                     | 7.50E-01                      | 2.87E-02                     | 1.01E-01                      | 9.77E-01                       |

|          |        |       |       |       |       |          |          |          |          |          |          |          |
|----------|--------|-------|-------|-------|-------|----------|----------|----------|----------|----------|----------|----------|
| 93.04576 | 33.87  | 15.49 | 14.85 | 14.90 | 14.83 | 1.47E-06 | 2.86E-05 | 1.04E-04 | 2.54E-05 | 9.87E-01 | 9.99E-01 | 9.66E-01 |
| 93.89662 | 297.31 | 14.40 | 13.97 | 14.85 | 14.78 | 1.73E-03 | 2.84E-01 | 2.26E-01 | 4.16E-01 | 2.17E-03 | 8.84E-03 | 9.90E-01 |
| 93.97264 | 105.13 | 14.56 | 13.34 | 13.26 | 13.68 | 2.08E-17 | 1.24E-13 | 4.47E-14 | 1.12E-07 | 9.51E-01 | 1.38E-01 | 3.77E-02 |
| 93.99101 | 56.64  | 14.38 | 14.23 | 14.31 | 14.95 | 3.53E-01 | 9.85E-01 | 9.98E-01 | 5.31E-01 | 9.98E-01 | 3.52E-01 | 4.45E-01 |
| 94.00449 | 292.69 | 16.22 | 15.69 | 15.68 | 15.07 | 6.39E-07 | 2.95E-02 | 2.32E-02 | 7.50E-08 | 1.00E+00 | 1.12E-02 | 1.22E-02 |
| 94.02971 | 215.63 | 18.14 | 16.25 | 16.16 | 16.91 | 4.49E-21 | 4.24E-14 | 4.09E-14 | 6.30E-08 | 9.68E-01 | 1.14E-02 | 2.37E-03 |
| 94.03859 | 24.93  | 16.14 | 15.45 | 15.34 | 15.31 | 1.63E-08 | 2.11E-05 | 5.55E-07 | 4.64E-07 | 8.96E-01 | 8.05E-01 | 9.96E-01 |
| 94.04092 | 286.27 | 16.59 | 14.54 | 14.70 | 14.15 | 1.39E-17 | 2.35E-12 | 6.19E-11 | 4.29E-14 | 9.32E-01 | 5.03E-01 | 1.94E-01 |
| 94.11284 | 227.87 | 15.29 | 11.23 | 10.81 | 11.49 | 4.57E-84 | 5.11E-15 | 5.11E-15 | 5.11E-15 | 4.16E-02 | 4.00E-01 | 2.51E-04 |
| 94.92504 | 22.1   | 21.07 | 20.30 | 20.28 | 20.72 | 2.98E-05 | 2.21E-04 | 1.29E-04 | 2.56E-01 | 1.00E+00 | 1.28E-01 | 1.01E-01 |
| 94.98049 | 156.77 | 20.06 | 20.44 | 20.44 | 20.62 | 2.82E-02 | 1.77E-01 | 1.75E-01 | 1.92E-02 | 1.00E+00 | 7.93E-01 | 7.82E-01 |
| 94.9806  | 294.23 | 18.76 | 19.55 | 19.57 | 19.92 | 3.33E-15 | 2.80E-08 | 7.77E-09 | 4.65E-14 | 9.98E-01 | 3.56E-02 | 5.25E-02 |
| 95.01374 | 127.62 | 15.21 | 14.35 | 14.17 | 14.83 | 4.82E-15 | 5.62E-10 | 9.81E-14 | 2.05E-02 | 4.90E-01 | 2.06E-03 | 5.99E-06 |
| 95.02491 | 271.98 | 18.88 | 17.70 | 17.88 | 18.04 | 9.77E-10 | 2.78E-09 | 4.38E-07 | 5.46E-05 | 7.59E-01 | 2.91E-01 | 8.43E-01 |
| 95.05008 | 156.09 | 15.41 | 13.96 | 14.15 | 14.68 | 2.92E-21 | 4.24E-14 | 4.43E-14 | 5.97E-06 | 5.41E-01 | 1.52E-05 | 2.49E-03 |
| 95.06761 | 268.78 | 19.07 | 17.82 | 18.07 | 18.71 | 5.88E-15 | 1.83E-13 | 1.70E-09 | 1.00E-01 | 3.84E-01 | 5.94E-07 | 4.96E-04 |
| 95.67016 | 239.81 | 15.49 | 14.08 | 14.69 | 14.56 | 6.58E-07 | 1.48E-07 | 6.14E-03 | 1.51E-03 | 6.85E-02 | 2.40E-01 | 9.57E-01 |
| 95.82431 | 213.25 | 12.31 | 12.36 | 12.61 | 13.43 | 3.17E-04 | 9.98E-01 | 6.76E-01 | 3.97E-04 | 7.98E-01 | 1.16E-03 | 2.02E-02 |
| 95.95206 | 290.81 | 12.25 | 17.13 | 17.06 | 16.43 | 1.92E-50 | 5.11E-15 | 5.11E-15 | 5.11E-15 | 9.94E-01 | 8.70E-02 | 1.44E-01 |
| 95.95218 | 86.66  | 16.54 | 16.82 | 16.54 | 16.46 | 8.15E-02 | 1.85E-01 | 1.00E+00 | 9.59E-01 | 2.07E-01 | 8.05E-02 | 9.57E-01 |
| 95.98005 | 158.18 | 15.37 | 14.67 | 14.82 | 15.08 | 2.91E-06 | 3.15E-06 | 2.68E-04 | 1.47E-01 | 7.33E-01 | 2.62E-02 | 2.54E-01 |
| 96.00893 | 283.66 | 17.77 | 17.17 | 17.52 | 17.27 | 1.21E-07 | 2.15E-07 | 7.90E-02 | 3.36E-05 | 6.97E-03 | 8.10E-01 | 1.05E-01 |
| 96.02027 | 211.33 | 13.76 | 9.72  | 10.93 | 9.20  | 5.20E-09 | 4.62E-07 | 6.41E-04 | 2.71E-08 | 3.64E-01 | 9.08E-01 | 1.10E-01 |
| 96.02035 | 25.8   | 14.96 | 12.20 | 13.49 | 13.55 | 7.04E-05 | 1.38E-05 | 4.79E-02 | 7.80E-02 | 1.20E-01 | 1.13E-01 | 1.00E+00 |
| 96.02833 | 101.49 | 14.76 | 13.33 | 13.44 | 13.93 | 7.08E-22 | 4.22E-14 | 4.46E-14 | 1.64E-07 | 8.65E-01 | 3.53E-04 | 4.95E-03 |
| 96.04537 | 187.22 | 16.87 | 14.70 | 14.74 | 15.47 | 4.28E-42 | 5.11E-15 | 5.11E-15 | 4.47E-14 | 9.95E-01 | 2.16E-06 | 5.38E-06 |
| 96.05661 | 258.15 | 19.80 | 17.79 | 17.98 | 17.76 | 1.69E-69 | 5.11E-15 | 5.11E-15 | 5.11E-15 | 1.44E-01 | 9.88E-01 | 7.65E-02 |
| 96.27362 | 239.38 | 18.85 | 17.87 | 18.20 | 18.48 | 1.14E-18 | 4.24E-14 | 8.63E-10 | 1.35E-03 | 5.59E-03 | 7.82E-08 | 3.63E-02 |
| 96.92212 | 25.71  | 18.31 | 17.26 | 17.20 | 17.81 | 3.38E-10 | 4.38E-08 | 5.64E-09 | 2.95E-02 | 9.89E-01 | 1.60E-02 | 5.66E-03 |
| 96.95179 | 18.97  | 14.21 | 14.88 | 14.55 | 14.55 | 7.69E-03 | 2.69E-03 | 2.85E-01 | 2.91E-01 | 3.03E-01 | 3.59E-01 | 1.00E+00 |
| 96.96036 | 17.22  | 24.50 | 25.73 | 25.57 | 25.47 | 4.44E-37 | 5.11E-15 | 5.11E-15 | 2.15E-14 | 2.22E-01 | 1.61E-02 | 6.62E-01 |
| 96.96938 | 22.95  | 25.09 | 26.21 | 26.32 | 26.23 | 2.73E-28 | 3.91E-14 | 1.09E-14 | 4.06E-14 | 7.13E-01 | 9.98E-01 | 8.24E-01 |
| 96.97632 | 113.21 | 18.89 | 18.02 | 18.31 | 18.94 | 3.94E-03 | 1.33E-02 | 1.68E-01 | 9.98E-01 | 7.54E-01 | 1.33E-02 | 1.51E-01 |
| 97.00416 | 290.8  | 18.26 | 17.20 | 17.40 | 17.03 | 5.58E-24 | 4.32E-14 | 6.21E-13 | 2.91E-14 | 3.00E-01 | 4.59E-01 | 8.86E-03 |
| 97.00423 | 84.13  | 16.03 | 13.99 | 14.26 | 14.58 | 9.68E-36 | 5.11E-15 | 5.33E-15 | 4.44E-14 | 2.23E-01 | 4.96E-04 | 1.37E-01 |
| 97.02933 | 291.97 | 16.68 | 16.19 | 16.15 | 16.46 | 1.06E-07 | 4.64E-06 | 7.13E-07 | 1.08E-01 | 9.88E-01 | 4.70E-02 | 1.80E-02 |
| 97.04055 | 281.44 | 17.96 | 16.68 | 16.82 | 16.74 | 1.44E-35 | 5.11E-15 | 7.11E-15 | 5.33E-15 | 4.51E-01 | 9.45E-01 | 8.13E-01 |
| 97.06573 | 180.38 | 15.97 | 15.54 | 15.59 | 16.04 | 3.26E-09 | 1.02E-05 | 1.16E-04 | 8.74E-01 | 9.37E-01 | 1.04E-06 | 1.24E-05 |
| 97.51646 | 226.43 | 13.53 | 10.77 | 11.68 | 13.22 | 1.01E-09 | 1.02E-08 | 1.75E-04 | 9.06E-01 | 1.82E-01 | 1.64E-06 | 4.82E-03 |
| 97.95936 | 107.58 | 15.07 | 15.38 | 15.46 | 15.13 | 1.00E-03 | 2.68E-02 | 2.55E-03 | 9.55E-01 | 9.00E-01 | 1.35E-01 | 2.35E-02 |
| 97.9594  | 20.79  | 17.11 | 18.10 | 17.89 | 17.79 | 3.71E-21 | 3.71E-14 | 7.88E-14 | 1.43E-10 | 1.36E-01 | 1.06E-02 | 7.25E-01 |
| 97.97379 | 19.7   | 15.30 | 15.46 | 15.46 | 15.47 | 6.16E-01 | 7.10E-01 | 6.88E-01 | 6.98E-01 | 1.00E+00 | 1.00E+00 | 1.00E+00 |
| 98.00699 | 23.74  | 14.92 | 14.97 | 15.26 | 14.91 | 1.96E-01 | 9.93E-01 | 2.40E-01 | 1.00E+00 | 4.02E-01 | 9.87E-01 | 2.48E-01 |
| 98.01212 | 209.98 | 14.55 | 8.56  | 8.88  | 9.11  | 5.91E-16 | 3.88E-13 | 3.20E-12 | 9.93E-11 | 9.75E-01 | 8.95E-01 | 9.91E-01 |
| 98.02455 | 288.9  | 18.74 | 18.41 | 18.36 | 18.45 | 6.23E-02 | 1.49E-01 | 6.20E-02 | 2.52E-01 | 9.85E-01 | 9.97E-01 | 9.45E-01 |

|           |        |       |       |       |       |           |          |          |          |          |          |          |
|-----------|--------|-------|-------|-------|-------|-----------|----------|----------|----------|----------|----------|----------|
| 98.03581  | 290.42 | 16.86 | 15.44 | 15.84 | 15.55 | 1.35E-20  | 4.37E-14 | 7.57E-11 | 4.29E-14 | 3.28E-02 | 8.81E-01 | 2.17E-01 |
| 98.03589  | 92.41  | 17.01 | 15.20 | 15.86 | 16.23 | 8.47E-37  | 5.11E-15 | 4.20E-14 | 1.14E-09 | 1.89E-07 | 4.88E-14 | 1.13E-02 |
| 98.04312  | 134.77 | 14.50 | 13.62 | 14.08 | 14.07 | 7.84E-06  | 1.15E-06 | 4.77E-02 | 5.35E-02 | 3.36E-02 | 4.81E-02 | 1.00E+00 |
| 98.06098  | 133.96 | 14.57 | 12.92 | 13.16 | 13.42 | 3.26E-25  | 1.53E-14 | 4.36E-14 | 1.68E-12 | 3.38E-01 | 5.50E-03 | 3.12E-01 |
| 98.94893  | 144    | 14.40 | 14.47 | 14.45 | 14.14 | 2.18E-01  | 9.75E-01 | 9.94E-01 | 4.03E-01 | 9.99E-01 | 2.25E-01 | 2.88E-01 |
| 98.96423  | 106.76 | 15.20 | 15.47 | 15.69 | 15.23 | 2.12E-04  | 1.11E-01 | 3.77E-04 | 9.96E-01 | 3.07E-01 | 2.23E-01 | 1.97E-03 |
| 98.96429  | 23.36  | 17.29 | 18.39 | 18.10 | 18.02 | 1.24E-25  | 7.11E-15 | 4.26E-14 | 1.35E-12 | 1.21E-02 | 8.08E-04 | 8.08E-01 |
| 98.97184  | 110.7  | 19.59 | 19.28 | 19.36 | 19.92 | 3.52E-02  | 4.87E-01 | 7.17E-01 | 4.84E-01 | 9.83E-01 | 3.37E-02 | 8.00E-02 |
| 98.9728   | 26.45  | 18.74 | 19.02 | 19.03 | 19.23 | 1.04E-06  | 5.09E-03 | 2.75E-03 | 2.28E-07 | 9.99E-01 | 8.75E-02 | 1.15E-01 |
| 99.00674  | 163.95 | 17.38 | 15.99 | 15.47 | 15.82 | 1.35E-08  | 7.47E-05 | 1.84E-08 | 1.20E-05 | 3.68E-01 | 9.56E-01 | 7.12E-01 |
| 99.00861  | 292.22 | 17.72 | 17.62 | 17.60 | 18.07 | 1.35E-05  | 6.70E-01 | 5.87E-01 | 2.86E-03 | 9.99E-01 | 6.37E-05 | 3.29E-05 |
| 99.01982  | 289.29 | 20.90 | 20.27 | 20.44 | 20.06 | 3.55E-08  | 2.48E-05 | 3.28E-03 | 2.43E-08 | 6.02E-01 | 4.47E-01 | 3.63E-02 |
| 99.02798  | 168.02 | 15.44 | 14.69 | 14.58 | 15.13 | 2.24E-10  | 2.37E-07 | 2.05E-09 | 1.03E-01 | 8.51E-01 | 9.52E-03 | 5.41E-04 |
| 99.04607  | 190.32 | 18.92 | 19.13 | 18.60 | 18.24 | 3.26E-02  | 9.02E-01 | 6.92E-01 | 1.21E-01 | 3.06E-01 | 2.74E-02 | 6.66E-01 |
| 99.04651  | 26.45  | 17.33 | 17.41 | 16.90 | 16.99 | 3.33E-04  | 9.21E-01 | 7.90E-03 | 7.78E-02 | 1.28E-03 | 1.85E-02 | 9.02E-01 |
| 99.05554  | 162.05 | 14.78 | 13.15 | 13.16 | 13.47 | 9.14E-17  | 1.12E-13 | 9.75E-14 | 3.09E-09 | 1.00E+00 | 4.20E-01 | 4.34E-01 |
| 99.08145  | 106.72 | 14.93 | 13.72 | 13.94 | 14.37 | 3.39E-19  | 4.37E-14 | 3.11E-13 | 9.78E-05 | 2.90E-01 | 6.54E-06 | 5.64E-03 |
| 99.80605  | 55.32  | 12.99 | 13.48 | 13.19 | 13.56 | 1.13E-01  | 2.26E-01 | 8.67E-01 | 1.34E-01 | 6.75E-01 | 9.90E-01 | 5.00E-01 |
| 99.92561  | 297.18 | 18.52 | 18.49 | 18.25 | 19.45 | 1.24E-05  | 9.99E-01 | 6.45E-01 | 7.19E-04 | 7.58E-01 | 6.14E-04 | 9.14E-06 |
| 99.92568  | 148.27 | 19.32 | 17.89 | 18.13 | 18.56 | 2.37E-12  | 6.33E-12 | 7.61E-09 | 6.94E-04 | 5.92E-01 | 5.00E-03 | 1.36E-01 |
| 99.97136  | 126.28 | 14.52 | 13.47 | 13.52 | 14.27 | 2.64E-15  | 6.41E-12 | 3.56E-11 | 2.93E-01 | 9.86E-01 | 7.98E-07 | 3.27E-06 |
| 100.00384 | 290.95 | 17.05 | 16.99 | 17.01 | 17.35 | 3.99E-04  | 8.89E-01 | 9.74E-01 | 5.68E-03 | 9.91E-01 | 6.86E-04 | 1.75E-03 |
| 100.01211 | 24.47  | 18.12 | 17.59 | 17.67 | 18.10 | 1.83E-06  | 6.92E-05 | 9.19E-04 | 9.99E-01 | 9.10E-01 | 3.03E-04 | 3.02E-03 |
| 100.02264 | 120.14 | 14.92 | 15.18 | 15.28 | 15.15 | 3.12E-01  | 5.51E-01 | 2.59E-01 | 6.61E-01 | 9.61E-01 | 9.99E-01 | 9.28E-01 |
| 100.03058 | 23.3   | 19.29 | 18.90 | 18.88 | 18.58 | 2.01E-04  | 5.88E-02 | 3.85E-02 | 5.37E-05 | 9.99E-01 | 1.82E-01 | 2.26E-01 |
| 100.04025 | 290.65 | 16.79 | 16.20 | 16.22 | 16.49 | 2.59E-09  | 5.28E-08 | 7.56E-08 | 1.79E-02 | 9.99E-01 | 2.89E-02 | 3.74E-02 |
| 100.25129 | 262.42 | 14.78 | 14.66 | 12.84 | 12.57 | 1.62E-11  | 9.87E-01 | 5.60E-07 | 3.54E-08 | 6.03E-06 | 4.36E-07 | 8.92E-01 |
| 100.92577 | 291.11 | 12.89 | 13.14 | 11.98 | 14.85 | 9.16E-08  | 9.38E-01 | 1.65E-01 | 1.35E-04 | 5.08E-02 | 1.80E-03 | 1.59E-08 |
| 100.92583 | 140.16 | 15.62 | 13.45 | 13.62 | 14.14 | 1.18E-39  | 5.11E-15 | 5.11E-15 | 4.13E-14 | 6.28E-01 | 3.82E-05 | 3.25E-03 |
| 100.9461  | 19.23  | 15.19 | 12.92 | 12.60 | 12.70 | 1.07E-09  | 1.66E-06 | 2.59E-08 | 2.60E-07 | 8.80E-01 | 9.60E-01 | 9.96E-01 |
| 100.96459 | 51     | 21.80 | 19.23 | 22.57 | 22.35 | 3.01E-110 | 5.11E-15 | 4.46E-14 | 7.14E-10 | 5.11E-15 | 5.11E-15 | 4.89E-02 |
| 100.96747 | 112.47 | 17.34 | 17.99 | 18.06 | 18.14 | 2.05E-05  | 1.60E-03 | 2.86E-04 | 8.08E-05 | 9.78E-01 | 8.41E-01 | 9.71E-01 |
| 100.98555 | 99.64  | 17.97 | 16.16 | 16.53 | 16.49 | 5.21E-21  | 4.22E-14 | 1.64E-13 | 2.88E-13 | 1.77E-01 | 2.74E-01 | 9.98E-01 |
| 100.99908 | 291.49 | 19.53 | 19.49 | 19.45 | 18.98 | 1.67E-08  | 9.80E-01 | 8.18E-01 | 6.19E-08 | 9.67E-01 | 9.35E-07 | 6.60E-06 |
| 101.00729 | 106.94 | 15.17 | 14.36 | 14.90 | 15.05 | 1.85E-04  | 1.17E-04 | 4.47E-01 | 9.17E-01 | 2.61E-02 | 3.07E-03 | 8.65E-01 |
| 101.02438 | 164.56 | 21.20 | 24.35 | 24.60 | 24.71 | 9.41E-27  | 4.22E-14 | 3.42E-14 | 3.35E-14 | 8.66E-01 | 7.04E-01 | 9.88E-01 |
| 101.03554 | 84.16  | 15.91 | 14.13 | 14.47 | 14.65 | 1.86E-24  | 1.69E-14 | 4.31E-14 | 8.22E-13 | 1.59E-01 | 1.06E-02 | 6.80E-01 |
| 101.06067 | 256    | 17.76 | 17.32 | 17.48 | 16.85 | 4.09E-05  | 7.30E-02 | 3.91E-01 | 1.06E-05 | 8.29E-01 | 6.85E-02 | 5.84E-03 |
| 101.06075 | 19.67  | 15.07 | 14.66 | 14.81 | 14.77 | 9.92E-02  | 7.16E-02 | 4.16E-01 | 3.09E-01 | 8.03E-01 | 9.21E-01 | 9.95E-01 |
| 101.58177 | 284.7  | 16.43 | 16.90 | 16.89 | 16.30 | 3.68E-02  | 2.19E-01 | 2.41E-01 | 9.60E-01 | 1.00E+00 | 9.87E-02 | 1.09E-01 |
| 101.96793 | 78.44  | 14.71 | 13.38 | 13.42 | 13.92 | 9.10E-15  | 9.54E-13 | 2.34E-12 | 4.37E-05 | 9.96E-01 | 1.57E-02 | 2.71E-02 |
| 101.98071 | 142.33 | 16.30 | 14.65 | 14.41 | 14.67 | 6.58E-32  | 2.04E-14 | 5.11E-15 | 3.22E-14 | 3.56E-01 | 9.99E-01 | 3.17E-01 |
| 102.00966 | 291.13 | 15.56 | 13.29 | 13.52 | 13.42 | 1.06E-06  | 9.52E-06 | 7.02E-05 | 5.89E-05 | 9.63E-01 | 9.93E-01 | 9.97E-01 |
| 102.01951 | 291.14 | 17.08 | 17.09 | 17.14 | 17.48 | 3.13E-03  | 1.00E+00 | 9.60E-01 | 4.69E-03 | 9.75E-01 | 7.73E-03 | 2.46E-02 |
| 102.02776 | 21.05  | 17.51 | 17.60 | 17.17 | 17.17 | 6.97E-07  | 7.52E-01 | 1.03E-03 | 2.32E-03 | 3.02E-05 | 8.64E-05 | 1.00E+00 |

|           |        |       |       |       |       |          |          |          |          |          |          |          |
|-----------|--------|-------|-------|-------|-------|----------|----------|----------|----------|----------|----------|----------|
| 102.04612 | 223.47 | 17.40 | 17.73 | 17.81 | 16.67 | 3.20E-16 | 4.35E-02 | 5.17E-03 | 2.74E-07 | 9.10E-01 | 4.31E-13 | 4.66E-14 |
| 102.04629 | 31     | 17.76 | 16.83 | 16.77 | 16.67 | 3.24E-11 | 1.67E-07 | 1.79E-08 | 1.69E-09 | 9.84E-01 | 7.66E-01 | 9.22E-01 |
| 102.05607 | 18.97  | 20.59 | 21.46 | 21.26 | 21.05 | 4.19E-19 | 4.40E-14 | 1.27E-12 | 2.93E-06 | 1.26E-01 | 8.40E-05 | 9.43E-02 |
| 102.77097 | 260.34 | 16.37 | 16.24 | 15.95 | 15.32 | 8.76E-05 | 9.36E-01 | 2.35E-01 | 6.46E-05 | 5.89E-01 | 9.84E-04 | 4.55E-02 |
| 102.81995 | 261.1  | 14.43 | 14.78 | 14.18 | 12.92 | 1.65E-05 | 7.66E-01 | 9.01E-01 | 3.43E-04 | 3.68E-01 | 1.08E-05 | 4.99E-03 |
| 102.95681 | 34.47  | 22.87 | 22.85 | 23.18 | 22.37 | 2.47E-06 | 9.98E-01 | 1.17E-01 | 2.68E-03 | 9.23E-02 | 6.46E-03 | 3.88E-07 |
| 102.96269 | 67.91  | 17.40 | 16.13 | 18.18 | 17.83 | 5.47E-30 | 8.09E-14 | 1.85E-06 | 2.66E-02 | 5.11E-15 | 3.51E-14 | 1.18E-01 |
| 103.00357 | 125.18 | 15.36 | 14.70 | 14.37 | 15.55 | 7.47E-19 | 1.69E-06 | 5.35E-13 | 4.68E-01 | 5.48E-02 | 4.56E-09 | 4.42E-14 |
| 103.00371 | 20.37  | 16.76 | 17.56 | 17.50 | 17.60 | 8.99E-11 | 2.15E-08 | 1.73E-07 | 1.01E-08 | 9.71E-01 | 9.92E-01 | 8.89E-01 |
| 103.01753 | 211.62 | 13.76 | 9.11  | 8.70  | 9.15  | 2.02E-27 | 4.02E-14 | 1.58E-14 | 4.21E-14 | 8.08E-01 | 1.00E+00 | 7.75E-01 |
| 103.02211 | 179.7  | 16.82 | 17.28 | 17.91 | 17.07 | 1.58E-04 | 2.38E-01 | 6.69E-05 | 7.63E-01 | 6.04E-02 | 8.38E-01 | 6.25E-03 |
| 103.02854 | 136.24 | 14.94 | 14.70 | 14.23 | 14.49 | 4.53E-03 | 6.31E-01 | 2.32E-03 | 1.32E-01 | 9.84E-02 | 7.57E-01 | 5.90E-01 |
| 103.03015 | 214.83 | 15.75 | 9.20  | 9.51  | 9.81  | 3.20E-42 | 5.11E-15 | 5.11E-15 | 5.11E-15 | 8.92E-01 | 5.37E-01 | 9.12E-01 |
| 103.03101 | 127.63 | 13.63 | 14.24 | 14.04 | 14.35 | 1.75E-03 | 9.47E-03 | 1.39E-01 | 1.95E-03 | 7.43E-01 | 9.51E-01 | 4.24E-01 |
| 103.03999 | 144.95 | 20.90 | 23.06 | 22.89 | 22.54 | 5.63E-10 | 6.21E-09 | 6.72E-08 | 2.33E-05 | 9.62E-01 | 4.75E-01 | 7.62E-01 |
| 103.05942 | 19.61  | 15.02 | 15.65 | 15.27 | 15.34 | 3.04E-06 | 4.74E-07 | 1.09E-01 | 3.13E-02 | 7.36E-03 | 5.13E-02 | 9.42E-01 |
| 103.48865 | 232.7  | 15.00 | 11.11 | 10.68 | 11.51 | 1.33E-64 | 5.11E-15 | 5.11E-15 | 5.11E-15 | 1.22E-01 | 2.05E-01 | 2.87E-04 |
| 103.9253  | 257.52 | 16.33 | 16.06 | 16.35 | 16.03 | 3.98E-02 | 2.07E-01 | 9.99E-01 | 1.44E-01 | 1.81E-01 | 9.96E-01 | 1.25E-01 |
| 103.96012 | 32.11  | 15.67 | 14.94 | 15.38 | 14.81 | 5.50E-10 | 5.50E-07 | 1.27E-01 | 6.95E-09 | 6.52E-03 | 7.79E-01 | 2.68E-04 |
| 103.97285 | 256.83 | 14.80 | 14.81 | 14.79 | 14.19 | 1.60E-01 | 1.00E+00 | 1.00E+00 | 2.11E-01 | 1.00E+00 | 2.18E-01 | 2.39E-01 |
| 104.02525 | 287.07 | 19.34 | 17.91 | 18.08 | 17.97 | 9.40E-30 | 7.77E-15 | 3.73E-14 | 2.31E-14 | 4.93E-01 | 9.61E-01 | 8.13E-01 |
| 104.02553 | 85.08  | 17.01 | 14.82 | 15.24 | 15.76 | 4.30E-44 | 5.11E-15 | 5.11E-15 | 4.23E-14 | 6.85E-03 | 1.03E-10 | 5.58E-04 |
| 104.02992 | 105.86 | 15.02 | 13.86 | 13.89 | 13.95 | 2.03E-09 | 1.11E-07 | 1.62E-07 | 2.13E-06 | 9.99E-01 | 9.73E-01 | 9.90E-01 |
| 104.03434 | 183.65 | 17.71 | 18.78 | 18.13 | 18.54 | 5.45E-02 | 4.49E-02 | 7.17E-01 | 1.98E-01 | 4.08E-01 | 9.42E-01 | 7.80E-01 |
| 104.0352  | 27.37  | 21.21 | 20.72 | 20.99 | 20.90 | 5.39E-07 | 1.13E-07 | 5.13E-02 | 2.36E-03 | 8.05E-03 | 1.73E-01 | 7.07E-01 |
| 104.0433  | 132.3  | 16.61 | 18.27 | 17.18 | 16.95 | 7.10E-08 | 2.87E-08 | 1.47E-01 | 6.20E-01 | 7.12E-04 | 4.18E-05 | 8.41E-01 |
| 104.04343 | 24.76  | 17.59 | 17.67 | 16.82 | 16.71 | 2.03E-13 | 9.53E-01 | 3.73E-07 | 1.69E-08 | 6.09E-08 | 2.77E-09 | 8.68E-01 |
| 104.06179 | 159.44 | 15.08 | 13.61 | 13.59 | 13.96 | 6.35E-24 | 3.94E-14 | 3.85E-14 | 3.91E-12 | 1.00E+00 | 9.15E-02 | 6.99E-02 |
| 104.06195 | 27.51  | 17.69 | 16.89 | 16.84 | 16.61 | 2.83E-09 | 1.81E-05 | 3.48E-06 | 6.58E-09 | 9.90E-01 | 3.51E-01 | 5.18E-01 |
| 104.95385 | 34.27  | 21.21 | 21.18 | 21.56 | 20.72 | 3.25E-06 | 9.97E-01 | 6.79E-02 | 6.42E-03 | 4.82E-02 | 1.59E-02 | 4.59E-07 |
| 104.96094 | 24.83  | 14.32 | 14.41 | 14.34 | 13.73 | 9.86E-02 | 9.90E-01 | 1.00E+00 | 1.81E-01 | 9.95E-01 | 1.11E-01 | 1.75E-01 |
| 105.01923 | 287.39 | 17.92 | 17.86 | 17.97 | 18.29 | 6.19E-04 | 9.43E-01 | 9.51E-01 | 3.00E-03 | 7.07E-01 | 6.01E-04 | 1.89E-02 |
| 105.01927 | 163.56 | 18.18 | 19.92 | 20.52 | 20.42 | 3.99E-13 | 6.12E-07 | 1.12E-11 | 3.22E-10 | 2.49E-01 | 4.41E-01 | 9.90E-01 |
| 105.03779 | 225.03 | 22.85 | 21.50 | 21.25 | 22.10 | 3.50E-06 | 1.75E-04 | 4.51E-06 | 9.91E-02 | 8.69E-01 | 2.79E-01 | 5.41E-02 |
| 105.04571 | 259.9  | 21.04 | 18.45 | 18.67 | 18.72 | 6.09E-68 | 5.11E-15 | 5.11E-15 | 5.11E-15 | 2.00E-01 | 9.79E-02 | 9.78E-01 |
| 105.95714 | 30.25  | 12.97 | 12.78 | 13.33 | 12.26 | 3.82E-02 | 9.54E-01 | 7.25E-01 | 2.05E-01 | 4.26E-01 | 4.90E-01 | 2.04E-02 |
| 105.96037 | 92.37  | 15.34 | 13.97 | 14.37 | 14.44 | 1.53E-12 | 7.59E-13 | 2.49E-07 | 5.15E-06 | 1.16E-01 | 5.14E-02 | 9.76E-01 |
| 106.00476 | 210.35 | 13.96 | 8.87  | 8.78  | 9.67  | 3.58E-18 | 5.50E-14 | 4.62E-14 | 1.57E-10 | 9.99E-01 | 5.73E-01 | 4.77E-01 |
| 106.04096 | 290.75 | 27.25 | 25.90 | 26.20 | 25.95 | 4.22E-24 | 3.69E-14 | 9.61E-14 | 4.22E-14 | 9.28E-02 | 9.81E-01 | 2.33E-01 |
| 106.0695  | 19.53  | 14.99 | 15.43 | 15.26 | 14.97 | 5.07E-02 | 8.67E-02 | 4.71E-01 | 9.99E-01 | 7.98E-01 | 8.85E-02 | 4.47E-01 |
| 106.4801  | 267.22 | 17.30 | 16.85 | 16.38 | 16.30 | 3.01E-10 | 1.70E-02 | 3.40E-08 | 6.44E-09 | 1.72E-02 | 4.77E-03 | 9.57E-01 |
| 106.98086 | 22.02  | 18.67 | 19.34 | 19.17 | 19.12 | 1.19E-16 | 4.33E-14 | 1.80E-10 | 2.79E-08 | 1.19E-01 | 2.85E-02 | 9.17E-01 |
| 106.98624 | 69.01  | 13.89 | 14.94 | 12.02 | 12.66 | 4.47E-89 | 7.55E-15 | 5.11E-15 | 5.11E-15 | 5.11E-15 | 5.11E-15 | 1.06E-10 |
| 107.02491 | 286.89 | 20.99 | 19.69 | 19.94 | 19.66 | 6.43E-26 | 3.22E-14 | 4.53E-14 | 3.33E-14 | 1.64E-01 | 9.98E-01 | 1.23E-01 |
| 107.02509 | 30.4   | 18.60 | 17.71 | 17.01 | 17.27 | 2.59E-38 | 5.01E-14 | 5.11E-15 | 5.33E-15 | 8.99E-10 | 3.83E-04 | 6.96E-02 |

|           |        |       |       |       |       |          |          |          |          |          |          |          |
|-----------|--------|-------|-------|-------|-------|----------|----------|----------|----------|----------|----------|----------|
| 107.03618 | 292.16 | 24.23 | 22.35 | 22.51 | 22.25 | 3.47E-46 | 5.11E-15 | 5.11E-15 | 5.11E-15 | 5.57E-01 | 8.64E-01 | 1.68E-01 |
| 107.03629 | 18.09  | 18.87 | 18.35 | 18.27 | 18.18 | 5.20E-10 | 9.09E-06 | 1.43E-07 | 4.96E-09 | 8.64E-01 | 4.04E-01 | 8.48E-01 |
| 107.04195 | 156.42 | 15.31 | 15.74 | 15.46 | 15.18 | 1.77E-02 | 6.24E-02 | 8.07E-01 | 9.02E-01 | 3.90E-01 | 1.40E-02 | 4.26E-01 |
| 107.04424 | 285.93 | 23.01 | 21.27 | 21.48 | 21.30 | 9.20E-54 | 5.11E-15 | 5.11E-15 | 5.11E-15 | 1.18E-01 | 9.81E-01 | 2.78E-01 |
| 107.05008 | 219.43 | 17.67 | 17.60 | 17.48 | 17.38 | 7.81E-02 | 9.36E-01 | 3.58E-01 | 6.93E-02 | 7.39E-01 | 2.59E-01 | 8.26E-01 |
| 107.05332 | 129.68 | 14.45 | 13.64 | 13.38 | 13.85 | 5.27E-10 | 3.03E-06 | 2.40E-10 | 1.15E-03 | 3.38E-01 | 6.09E-01 | 2.27E-02 |
| 107.06135 | 212.49 | 15.80 | 8.80  | 9.79  | 9.87  | 1.08E-21 | 4.21E-14 | 4.67E-14 | 8.78E-14 | 4.99E-01 | 4.56E-01 | 9.99E-01 |
| 107.93695 | 270.17 | 19.39 | 19.02 | 19.21 | 19.24 | 6.73E-02 | 3.51E-02 | 5.57E-01 | 7.00E-01 | 5.05E-01 | 4.24E-01 | 9.98E-01 |
| 107.99223 | 270.06 | 17.60 | 16.93 | 17.17 | 17.40 | 1.06E-05 | 5.73E-06 | 6.35E-03 | 4.48E-01 | 3.03E-01 | 5.51E-03 | 3.48E-01 |
| 108.00904 | 207.98 | 14.07 | 8.46  | 7.57  | 8.78  | 4.67E-35 | 7.11E-15 | 5.11E-15 | 2.53E-14 | 2.40E-01 | 9.15E-01 | 6.42E-02 |
| 108.00905 | 91.26  | 15.44 | 13.78 | 13.80 | 14.10 | 5.98E-26 | 3.00E-14 | 3.02E-14 | 5.48E-14 | 1.00E+00 | 1.94E-01 | 2.24E-01 |
| 108.01248 | 24.83  | 18.47 | 18.79 | 19.29 | 19.11 | 2.80E-05 | 2.74E-01 | 2.34E-05 | 2.50E-03 | 2.63E-02 | 2.97E-01 | 7.58E-01 |
| 108.02017 | 291.6  | 20.42 | 19.55 | 19.61 | 19.27 | 6.77E-24 | 4.55E-14 | 1.51E-13 | 1.91E-14 | 9.31E-01 | 3.68E-02 | 5.88E-03 |
| 108.0205  | 23.25  | 19.62 | 18.40 | 18.50 | 19.24 | 7.92E-17 | 9.35E-14 | 2.38E-12 | 5.77E-02 | 9.06E-01 | 8.22E-07 | 1.50E-05 |
| 108.02923 | 292.03 | 17.23 | 17.35 | 17.33 | 17.49 | 1.95E-01 | 7.22E-01 | 8.14E-01 | 1.27E-01 | 9.98E-01 | 6.62E-01 | 5.52E-01 |
| 108.0332  | 290.53 | 16.59 | 14.98 | 15.72 | 15.81 | 1.68E-03 | 4.86E-04 | 1.28E-01 | 2.31E-01 | 2.77E-01 | 2.10E-01 | 9.97E-01 |
| 108.03948 | 291.94 | 18.95 | 16.42 | 16.34 | 16.45 | 2.44E-66 | 5.11E-15 | 5.11E-15 | 5.11E-15 | 9.10E-01 | 9.95E-01 | 8.08E-01 |
| 108.04538 | 212.92 | 18.45 | 17.67 | 17.71 | 18.23 | 5.99E-06 | 6.55E-05 | 1.45E-04 | 6.09E-01 | 9.96E-01 | 1.29E-02 | 2.29E-02 |
| 108.05661 | 259.05 | 19.61 | 16.77 | 16.97 | 16.83 | 1.56E-74 | 5.11E-15 | 5.11E-15 | 5.11E-15 | 3.32E-01 | 9.62E-01 | 6.54E-01 |
| 108.05665 | 78.83  | 17.08 | 14.54 | 14.67 | 15.26 | 3.39E-43 | 5.11E-15 | 5.11E-15 | 2.20E-14 | 8.42E-01 | 1.20E-04 | 2.33E-03 |
| 108.41523 | 296.72 | 14.85 | 15.51 | 16.10 | 15.71 | 2.63E-11 | 5.08E-04 | 5.26E-12 | 5.07E-06 | 3.62E-03 | 6.64E-01 | 1.21E-01 |
| 108.47085 | 296.9  | 13.20 | 13.62 | 14.10 | 13.94 | 5.93E-04 | 2.56E-01 | 4.63E-04 | 9.61E-03 | 1.58E-01 | 5.46E-01 | 8.95E-01 |
| 108.90186 | 119.7  | 16.01 | 15.38 | 15.48 | 15.97 | 3.11E-09 | 5.23E-07 | 2.24E-05 | 9.91E-01 | 8.45E-01 | 8.27E-06 | 2.22E-04 |
| 108.90197 | 39.75  | 19.28 | 16.55 | 16.63 | 17.49 | 8.23E-13 | 3.83E-11 | 9.59E-11 | 3.66E-05 | 9.96E-01 | 8.36E-02 | 1.29E-01 |
| 108.9906  | 134.26 | 14.21 | 13.33 | 13.10 | 13.71 | 4.60E-11 | 3.23E-07 | 5.63E-11 | 1.08E-02 | 4.57E-01 | 1.01E-01 | 1.26E-03 |
| 109.00417 | 291.5  | 16.62 | 16.46 | 16.36 | 16.26 | 1.11E-01 | 7.31E-01 | 3.00E-01 | 8.76E-02 | 9.01E-01 | 5.52E-01 | 9.13E-01 |
| 109.00431 | 82.06  | 16.48 | 14.05 | 14.52 | 14.99 | 1.68E-31 | 5.11E-15 | 2.51E-14 | 2.08E-13 | 4.73E-02 | 6.32E-06 | 6.01E-02 |
| 109.02373 | 21.53  | 15.16 | 9.79  | 11.76 | 12.86 | 2.46E-10 | 4.45E-11 | 3.79E-05 | 1.51E-02 | 4.77E-02 | 6.51E-04 | 4.87E-01 |
| 109.02942 | 164.8  | 16.42 | 16.38 | 16.59 | 16.60 | 2.88E-01 | 9.90E-01 | 5.98E-01 | 5.89E-01 | 4.35E-01 | 4.31E-01 | 1.00E+00 |
| 109.04065 | 245    | 23.23 | 20.93 | 21.31 | 21.48 | 9.45E-29 | 5.33E-15 | 3.73E-14 | 4.40E-14 | 1.81E-01 | 2.56E-02 | 8.14E-01 |
| 109.04074 | 24.23  | 20.43 | 19.24 | 19.30 | 19.46 | 1.83E-23 | 4.15E-14 | 4.24E-14 | 1.43E-13 | 9.65E-01 | 2.72E-01 | 5.23E-01 |
| 109.06584 | 112.93 | 16.19 | 15.02 | 15.29 | 15.53 | 4.17E-18 | 4.13E-14 | 7.61E-12 | 1.25E-06 | 1.25E-01 | 5.06E-04 | 2.41E-01 |
| 109.23981 | 265.22 | 17.18 | 17.12 | 17.07 | 16.91 | 4.54E-01 | 9.86E-01 | 9.18E-01 | 3.92E-01 | 9.92E-01 | 6.18E-01 | 7.82E-01 |
| 109.29348 | 265.01 | 16.27 | 16.12 | 15.74 | 15.15 | 8.75E-03 | 9.68E-01 | 3.79E-01 | 6.92E-03 | 6.87E-01 | 3.35E-02 | 3.34E-01 |
| 109.98602 | 50.93  | 15.71 | 15.40 | 15.75 | 15.69 | 9.80E-03 | 3.00E-02 | 9.79E-01 | 9.99E-01 | 1.13E-02 | 6.25E-02 | 9.56E-01 |
| 110.0077  | 251.52 | 14.32 | 15.04 | 14.95 | 15.12 | 1.46E-04 | 1.21E-03 | 5.60E-03 | 4.36E-04 | 9.68E-01 | 9.85E-01 | 8.52E-01 |
| 110.02458 | 289.22 | 17.22 | 16.92 | 16.85 | 17.10 | 8.72E-04 | 1.34E-02 | 1.04E-03 | 6.17E-01 | 8.97E-01 | 3.20E-01 | 7.80E-02 |
| 110.0358  | 289.6  | 19.89 | 18.18 | 18.55 | 18.44 | 7.92E-33 | 5.11E-15 | 3.33E-14 | 2.02E-14 | 2.27E-02 | 2.29E-01 | 8.12E-01 |
| 110.03596 | 25.14  | 18.09 | 16.83 | 16.57 | 16.72 | 3.17E-38 | 6.22E-15 | 5.11E-15 | 5.11E-15 | 7.25E-02 | 7.70E-01 | 4.95E-01 |
| 110.04392 | 283.39 | 16.88 | 11.99 | 12.23 | 14.20 | 3.32E-31 | 5.33E-15 | 6.22E-15 | 5.85E-10 | 9.30E-01 | 9.18E-07 | 1.22E-05 |
| 110.07233 | 219.11 | 16.00 | 10.15 | 10.57 | 10.73 | 1.11E-16 | 1.00E-13 | 1.60E-12 | 3.12E-11 | 9.35E-01 | 8.60E-01 | 9.96E-01 |
| 110.5052  | 267.66 | 15.17 | 16.13 | 15.48 | 15.94 | 5.54E-03 | 6.02E-03 | 7.09E-01 | 5.10E-02 | 1.25E-01 | 9.24E-01 | 4.27E-01 |
| 110.60973 | 272.12 | 16.56 | 16.26 | 16.19 | 16.01 | 3.07E-02 | 3.57E-01 | 1.72E-01 | 1.82E-02 | 9.81E-01 | 5.54E-01 | 7.77E-01 |
| 110.89894 | 108.65 | 15.56 | 14.71 | 14.84 | 15.23 | 3.18E-15 | 1.21E-13 | 7.59E-11 | 9.86E-03 | 6.48E-01 | 1.93E-05 | 1.67E-03 |
| 110.97555 | 290.68 | 15.15 | 17.00 | 16.72 | 16.40 | 8.78E-14 | 5.12E-13 | 4.73E-10 | 1.94E-06 | 6.35E-01 | 7.21E-02 | 5.61E-01 |

|           |        |       |       |       |       |          |          |          |          |          |          |          |
|-----------|--------|-------|-------|-------|-------|----------|----------|----------|----------|----------|----------|----------|
| 110.97583 | 18     | 14.80 | 15.66 | 15.50 | 15.37 | 2.89E-05 | 2.60E-05 | 8.65E-04 | 1.33E-02 | 8.20E-01 | 4.45E-01 | 9.14E-01 |
| 111.00631 | 113.04 | 14.67 | 13.72 | 13.57 | 14.54 | 4.36E-08 | 5.88E-05 | 1.72E-06 | 9.27E-01 | 8.94E-01 | 1.62E-03 | 9.52E-05 |
| 111.00886 | 22.73  | 23.09 | 23.62 | 24.25 | 24.07 | 9.23E-42 | 1.10E-11 | 5.11E-15 | 5.11E-15 | 5.10E-14 | 3.23E-08 | 9.98E-02 |
| 111.01986 | 274.46 | 21.57 | 21.54 | 21.60 | 21.65 | 9.48E-01 | 9.99E-01 | 9.99E-01 | 9.71E-01 | 9.90E-01 | 9.38E-01 | 9.92E-01 |
| 111.03926 | 209.07 | 14.16 | 7.43  | 8.38  | 8.76  | 1.03E-24 | 2.51E-14 | 4.31E-14 | 4.79E-14 | 4.19E-01 | 1.64E-01 | 9.33E-01 |
| 111.04505 | 185    | 17.93 | 17.60 | 17.69 | 17.96 | 3.22E-05 | 7.60E-04 | 2.03E-02 | 9.78E-01 | 7.59E-01 | 3.70E-04 | 9.90E-03 |
| 111.05636 | 90.61  | 15.96 | 13.44 | 13.69 | 14.20 | 1.32E-43 | 5.11E-15 | 5.11E-15 | 2.02E-14 | 3.77E-01 | 2.38E-05 | 8.48E-03 |
| 111.08142 | 168.41 | 16.19 | 14.85 | 15.01 | 15.53 | 1.10E-27 | 7.33E-15 | 3.40E-14 | 1.75E-07 | 4.97E-01 | 1.16E-07 | 6.20E-05 |
| 111.94726 | 22.79  | 15.97 | 16.04 | 15.74 | 15.85 | 1.11E-04 | 6.73E-01 | 4.35E-03 | 3.37E-01 | 9.50E-05 | 3.70E-02 | 3.94E-01 |
| 112.00382 | 291    | 16.30 | 16.65 | 16.72 | 17.13 | 3.56E-07 | 4.83E-02 | 1.07E-02 | 4.40E-08 | 9.62E-01 | 4.63E-03 | 1.89E-02 |
| 112.01217 | 21.59  | 18.38 | 18.76 | 19.59 | 19.42 | 7.47E-38 | 3.60E-05 | 5.11E-15 | 6.22E-15 | 4.31E-14 | 9.76E-12 | 1.91E-01 |
| 112.01506 | 290.62 | 16.66 | 17.63 | 17.42 | 17.36 | 1.58E-16 | 4.29E-14 | 1.04E-10 | 8.44E-09 | 1.95E-01 | 7.31E-02 | 9.55E-01 |
| 112.01519 | 210.7  | 15.06 | 12.77 | 12.98 | 13.78 | 6.23E-06 | 1.47E-05 | 8.05E-05 | 4.47E-02 | 9.75E-01 | 1.82E-01 | 3.63E-01 |
| 112.02327 | 172.27 | 16.52 | 16.67 | 17.06 | 16.80 | 1.99E-05 | 5.47E-01 | 7.24E-06 | 6.25E-02 | 2.68E-03 | 6.43E-01 | 1.07E-01 |
| 112.02341 | 28.25  | 17.74 | 16.79 | 16.75 | 17.13 | 3.72E-15 | 2.02E-12 | 2.80E-13 | 1.30E-05 | 9.94E-01 | 4.63E-02 | 2.16E-02 |
| 112.04022 | 289.75 | 17.10 | 16.87 | 16.85 | 17.06 | 3.27E-02 | 1.13E-01 | 6.46E-02 | 9.70E-01 | 9.97E-01 | 3.25E-01 | 2.23E-01 |
| 112.05145 | 282.99 | 18.00 | 19.20 | 19.32 | 18.95 | 4.80E-23 | 4.43E-14 | 3.55E-14 | 1.72E-11 | 7.83E-01 | 2.27E-01 | 2.51E-02 |
| 112.05164 | 36.57  | 17.41 | 18.62 | 18.38 | 17.63 | 2.77E-13 | 2.17E-11 | 7.53E-08 | 5.70E-01 | 4.57E-01 | 2.04E-07 | 1.29E-04 |
| 112.91212 | 45.69  | 15.58 | 16.33 | 16.39 | 16.31 | 8.73E-26 | 4.12E-14 | 2.71E-14 | 4.37E-14 | 8.52E-01 | 9.92E-01 | 7.11E-01 |
| 112.91524 | 45.73  | 15.30 | 15.79 | 15.89 | 15.95 | 1.14E-11 | 1.55E-06 | 3.16E-09 | 3.54E-10 | 6.89E-01 | 3.48E-01 | 9.32E-01 |
| 112.94186 | 39.98  | 15.01 | 15.09 | 14.86 | 14.85 | 2.98E-01 | 9.49E-01 | 7.10E-01 | 6.83E-01 | 4.01E-01 | 3.86E-01 | 1.00E+00 |
| 112.94623 | 46     | 15.24 | 15.30 | 15.28 | 15.36 | 7.18E-01 | 9.45E-01 | 9.83E-01 | 6.57E-01 | 9.98E-01 | 9.33E-01 | 8.62E-01 |
| 112.96971 | 46.23  | 14.87 | 16.12 | 16.26 | 16.07 | 8.73E-26 | 4.49E-14 | 2.20E-14 | 4.33E-14 | 6.99E-01 | 9.83E-01 | 4.82E-01 |
| 112.98556 | 46.06  | 27.77 | 28.75 | 28.85 | 28.71 | 2.58E-34 | 6.66E-15 | 5.11E-15 | 1.84E-14 | 5.91E-01 | 9.61E-01 | 3.15E-01 |
| 112.98833 | 28.82  | 19.28 | 18.78 | 18.74 | 19.37 | 1.31E-02 | 1.43E-01 | 9.60E-02 | 9.78E-01 | 9.99E-01 | 7.53E-02 | 4.90E-02 |
| 112.99909 | 292.29 | 17.98 | 17.82 | 17.95 | 18.14 | 8.91E-02 | 4.87E-01 | 9.91E-01 | 5.82E-01 | 6.83E-01 | 5.05E-02 | 4.25E-01 |
| 113.01392 | 33.32  | 15.54 | 13.00 | 14.58 | 14.25 | 6.23E-14 | 4.73E-14 | 5.41E-03 | 1.37E-04 | 1.67E-06 | 3.96E-04 | 7.04E-01 |
| 113.02425 | 291.04 | 18.94 | 18.44 | 18.38 | 18.54 | 3.98E-06 | 1.12E-04 | 6.97E-06 | 3.52E-03 | 9.40E-01 | 8.68E-01 | 5.42E-01 |
| 113.02907 | 46.18  | 15.01 | 15.90 | 15.98 | 16.01 | 1.74E-15 | 1.55E-10 | 2.32E-12 | 3.30E-12 | 9.27E-01 | 8.54E-01 | 9.97E-01 |
| 113.03547 | 288.81 | 17.75 | 17.46 | 17.61 | 17.81 | 5.36E-03 | 2.26E-02 | 5.13E-01 | 9.34E-01 | 4.51E-01 | 6.04E-03 | 2.35E-01 |
| 113.03564 | 33.15  | 17.91 | 16.44 | 16.63 | 16.76 | 1.35E-33 | 5.11E-15 | 7.33E-15 | 4.00E-14 | 3.29E-01 | 3.08E-02 | 6.66E-01 |
| 113.0436  | 106.51 | 16.41 | 14.38 | 14.39 | 15.26 | 3.17E-19 | 4.37E-14 | 4.27E-14 | 6.26E-06 | 1.00E+00 | 1.43E-03 | 1.32E-03 |
| 113.04383 | 19.59  | 17.59 | 15.80 | 15.83 | 15.83 | 3.16E-17 | 2.44E-13 | 3.13E-13 | 1.74E-12 | 9.99E-01 | 9.99E-01 | 1.00E+00 |
| 113.06067 | 293.91 | 16.87 | 16.78 | 16.70 | 16.82 | 2.20E-01 | 7.17E-01 | 1.71E-01 | 9.59E-01 | 7.71E-01 | 9.55E-01 | 4.64E-01 |
| 113.09711 | 106.85 | 14.61 | 12.48 | 12.58 | 13.63 | 1.64E-16 | 8.22E-14 | 3.54E-13 | 1.39E-03 | 9.79E-01 | 1.39E-04 | 5.70E-04 |
| 113.98061 | 49.04  | 17.50 | 16.48 | 16.74 | 17.23 | 6.05E-18 | 4.40E-14 | 2.55E-10 | 8.90E-02 | 9.36E-02 | 3.43E-09 | 1.73E-04 |
| 113.98882 | 45.59  | 22.34 | 22.72 | 22.86 | 22.78 | 4.45E-19 | 2.85E-10 | 4.26E-14 | 5.44E-13 | 4.10E-02 | 6.32E-01 | 5.03E-01 |
| 113.99142 | 26.85  | 15.77 | 15.66 | 15.89 | 15.31 | 1.07E-01 | 9.66E-01 | 9.54E-01 | 2.14E-01 | 7.70E-01 | 4.72E-01 | 8.04E-02 |
| 114.00965 | 290.17 | 15.94 | 15.26 | 15.07 | 15.51 | 2.92E-01 | 4.79E-01 | 2.54E-01 | 8.10E-01 | 9.80E-01 | 9.60E-01 | 8.17E-01 |
| 114.0195  | 280.51 | 18.21 | 18.12 | 18.18 | 18.40 | 1.60E-01 | 8.63E-01 | 9.90E-01 | 4.40E-01 | 9.65E-01 | 1.27E-01 | 2.97E-01 |
| 114.02763 | 135.86 | 15.35 | 14.69 | 14.73 | 15.00 | 1.73E-08 | 1.28E-07 | 5.74E-07 | 1.47E-02 | 9.86E-01 | 5.27E-02 | 1.11E-01 |
| 114.02779 | 21.54  | 16.58 | 16.40 | 16.07 | 16.14 | 1.88E-06 | 2.74E-01 | 4.32E-06 | 2.16E-04 | 8.92E-03 | 8.26E-02 | 8.97E-01 |
| 114.03099 | 21.27  | 15.64 | 15.16 | 15.05 | 15.46 | 6.33E-06 | 6.35E-04 | 1.24E-05 | 4.51E-01 | 8.19E-01 | 1.03E-01 | 9.59E-03 |
| 114.05587 | 284.64 | 17.82 | 17.86 | 17.93 | 17.66 | 1.22E-01 | 9.88E-01 | 7.29E-01 | 4.75E-01 | 9.03E-01 | 3.20E-01 | 8.11E-02 |
| 114.06547 | 243.36 | 17.03 | 18.09 | 17.90 | 16.89 | 4.10E-16 | 1.39E-10 | 1.21E-07 | 7.97E-01 | 5.94E-01 | 6.09E-12 | 5.14E-09 |

|           |        |       |       |       |       |          |          |          |          |          |          |          |
|-----------|--------|-------|-------|-------|-------|----------|----------|----------|----------|----------|----------|----------|
| 114.90064 | 46.19  | 13.85 | 14.62 | 14.40 | 14.59 | 4.05E-06 | 1.42E-05 | 3.10E-03 | 5.96E-05 | 5.35E-01 | 9.97E-01 | 6.81E-01 |
| 114.93391 | 291.25 | 14.42 | 15.70 | 15.77 | 16.67 | 9.92E-07 | 5.66E-03 | 2.56E-03 | 2.14E-07 | 9.97E-01 | 7.91E-02 | 1.17E-01 |
| 114.93396 | 131.99 | 15.97 | 13.79 | 13.65 | 14.23 | 7.40E-40 | 5.11E-15 | 5.11E-15 | 2.58E-14 | 7.99E-01 | 3.57E-02 | 2.01E-03 |
| 114.9363  | 29.46  | 15.45 | 15.01 | 14.55 | 14.90 | 3.64E-01 | 8.25E-01 | 2.81E-01 | 7.14E-01 | 8.08E-01 | 9.96E-01 | 9.14E-01 |
| 114.98976 | 46.89  | 20.93 | 21.56 | 21.65 | 21.55 | 1.50E-36 | 5.77E-15 | 5.11E-15 | 7.55E-15 | 3.33E-01 | 9.99E-01 | 2.90E-01 |
| 115.00377 | 17.93  | 23.96 | 24.56 | 24.66 | 24.47 | 5.81E-22 | 4.37E-14 | 3.89E-14 | 1.21E-11 | 5.08E-01 | 5.85E-01 | 4.46E-02 |
| 115.0148  | 292.88 | 16.65 | 16.29 | 16.44 | 16.41 | 8.67E-02 | 5.57E-02 | 4.54E-01 | 3.37E-01 | 7.12E-01 | 8.63E-01 | 9.94E-01 |
| 115.01483 | 187.95 | 16.32 | 14.52 | 14.25 | 15.15 | 1.28E-19 | 6.38E-14 | 4.31E-14 | 1.04E-06 | 5.94E-01 | 2.82E-02 | 4.15E-04 |
| 115.02293 | 121.11 | 15.57 | 15.05 | 15.31 | 15.40 | 5.91E-03 | 2.38E-03 | 2.63E-01 | 6.54E-01 | 3.09E-01 | 1.09E-01 | 9.33E-01 |
| 115.03006 | 261.91 | 19.06 | 16.98 | 16.95 | 17.06 | 1.88E-53 | 5.11E-15 | 5.11E-15 | 5.11E-15 | 9.88E-01 | 9.17E-01 | 7.67E-01 |
| 115.03009 | 87.66  | 16.90 | 14.46 | 15.11 | 15.40 | 8.10E-54 | 5.11E-15 | 5.11E-15 | 5.33E-15 | 8.14E-07 | 2.96E-12 | 7.25E-02 |
| 115.03991 | 276.89 | 20.55 | 19.74 | 19.52 | 19.95 | 9.96E-05 | 2.76E-03 | 6.31E-05 | 5.71E-02 | 8.00E-01 | 8.12E-01 | 2.86E-01 |
| 115.05112 | 287.45 | 17.36 | 16.86 | 16.84 | 17.32 | 7.72E-07 | 1.35E-04 | 6.34E-05 | 9.84E-01 | 9.99E-01 | 1.27E-03 | 6.88E-04 |
| 115.07631 | 258.39 | 20.49 | 21.67 | 21.17 | 20.56 | 3.64E-09 | 2.45E-08 | 2.54E-03 | 9.83E-01 | 5.57E-02 | 7.94E-07 | 1.52E-02 |
| 115.92059 | 170.73 | 15.55 | 13.97 | 13.84 | 14.31 | 5.28E-27 | 3.44E-14 | 1.04E-14 | 1.31E-13 | 8.26E-01 | 1.40E-01 | 1.54E-02 |
| 116.00706 | 19.15  | 19.11 | 19.65 | 19.75 | 19.56 | 2.35E-16 | 2.05E-11 | 4.51E-14 | 5.14E-08 | 4.80E-01 | 6.51E-01 | 5.25E-02 |
| 116.02526 | 291.24 | 21.10 | 19.68 | 19.89 | 19.80 | 6.52E-28 | 1.07E-14 | 4.33E-14 | 4.00E-14 | 3.55E-01 | 7.79E-01 | 9.16E-01 |
| 116.02542 | 23.83  | 17.59 | 16.35 | 15.83 | 16.01 | 8.91E-28 | 6.64E-14 | 6.22E-15 | 3.65E-14 | 2.95E-03 | 1.17E-01 | 6.42E-01 |
| 116.03512 | 291.1  | 18.56 | 18.12 | 18.34 | 18.88 | 8.76E-03 | 1.71E-01 | 7.26E-01 | 4.80E-01 | 7.47E-01 | 5.35E-03 | 8.17E-02 |
| 116.05055 | 23.05  | 18.40 | 17.42 | 17.79 | 17.86 | 1.01E-24 | 6.00E-15 | 1.95E-12 | 1.92E-09 | 6.94E-05 | 2.55E-06 | 8.14E-01 |
| 116.07157 | 284.35 | 20.78 | 20.66 | 20.75 | 20.65 | 3.97E-01 | 5.57E-01 | 9.86E-01 | 4.70E-01 | 7.78E-01 | 9.98E-01 | 6.93E-01 |
| 116.07964 | 239.61 | 16.39 | 16.21 | 16.32 | 16.11 | 3.17E-01 | 6.25E-01 | 9.58E-01 | 2.88E-01 | 9.01E-01 | 9.36E-01 | 5.87E-01 |
| 116.27952 | 252.43 | 15.06 | 14.03 | 14.74 | 14.48 | 2.47E-03 | 1.11E-03 | 6.42E-01 | 1.63E-01 | 5.25E-02 | 3.98E-01 | 7.92E-01 |
| 116.9284  | 291.7  | 21.44 | 21.46 | 21.30 | 22.29 | 2.00E-05 | 9.99E-01 | 9.02E-01 | 3.10E-04 | 8.59E-01 | 7.61E-04 | 2.80E-05 |
| 116.92844 | 158.51 | 21.44 | 19.56 | 19.82 | 19.88 | 1.82E-16 | 5.18E-14 | 1.12E-11 | 2.39E-10 | 6.43E-01 | 5.08E-01 | 9.94E-01 |
| 116.93452 | 29.8   | 13.90 | 13.22 | 12.24 | 13.42 | 3.10E-02 | 6.12E-01 | 1.65E-02 | 8.36E-01 | 3.26E-01 | 9.86E-01 | 1.89E-01 |
| 116.97233 | 167.06 | 19.04 | 16.70 | 16.39 | 17.33 | 5.27E-37 | 5.11E-15 | 5.11E-15 | 4.25E-14 | 3.19E-01 | 5.90E-03 | 6.57E-06 |
| 117.0192  | 293.31 | 19.95 | 19.96 | 20.07 | 20.57 | 1.91E-04 | 1.00E+00 | 8.49E-01 | 3.54E-04 | 8.76E-01 | 6.29E-04 | 7.46E-03 |
| 117.03449 | 189.55 | 16.10 | 15.14 | 14.90 | 15.09 | 4.15E-19 | 4.80E-12 | 4.41E-14 | 1.54E-12 | 2.43E-01 | 9.82E-01 | 4.69E-01 |
| 117.03799 | 30.34  | 19.77 | 19.29 | 19.19 | 18.97 | 8.48E-06 | 1.02E-02 | 1.05E-03 | 4.59E-06 | 9.28E-01 | 2.02E-01 | 5.08E-01 |
| 117.03842 | 171.1  | 16.90 | 17.13 | 18.35 | 17.57 | 4.09E-19 | 4.21E-01 | 4.15E-14 | 9.54E-05 | 2.19E-13 | 2.54E-02 | 4.78E-06 |
| 117.04568 | 290.15 | 17.30 | 15.94 | 16.29 | 16.16 | 5.92E-18 | 4.17E-14 | 2.05E-10 | 4.59E-12 | 8.85E-02 | 4.84E-01 | 8.24E-01 |
| 117.05557 | 288.33 | 19.03 | 18.11 | 18.15 | 18.67 | 8.79E-12 | 6.94E-10 | 2.60E-09 | 5.58E-02 | 9.92E-01 | 6.28E-04 | 1.59E-03 |
| 117.07491 | 174.68 | 17.01 | 16.59 | 16.28 | 16.62 | 2.75E-02 | 2.99E-01 | 1.25E-02 | 3.97E-01 | 5.83E-01 | 9.99E-01 | 5.18E-01 |
| 117.92846 | 291.14 | 17.34 | 17.36 | 17.08 | 18.31 | 2.95E-05 | 1.00E+00 | 7.10E-01 | 9.25E-04 | 6.73E-01 | 1.89E-03 | 1.94E-05 |
| 117.92854 | 161.81 | 17.94 | 15.33 | 15.70 | 15.64 | 1.91E-40 | 5.11E-15 | 5.11E-15 | 5.11E-15 | 1.61E-01 | 3.14E-01 | 9.91E-01 |
| 117.95467 | 118.11 | 15.54 | 15.01 | 15.08 | 14.23 | 2.27E-15 | 1.06E-03 | 4.89E-03 | 4.41E-14 | 9.69E-01 | 1.04E-06 | 8.71E-08 |
| 118.00455 | 294.96 | 16.46 | 16.69 | 16.43 | 16.21 | 1.51E-01 | 6.49E-01 | 9.99E-01 | 5.85E-01 | 5.70E-01 | 9.27E-02 | 6.91E-01 |
| 118.02258 | 121.95 | 15.86 | 15.09 | 15.74 | 15.96 | 5.68E-11 | 8.74E-09 | 7.90E-01 | 8.36E-01 | 1.75E-06 | 5.67E-10 | 3.25E-01 |
| 118.02977 | 188.33 | 16.61 | 15.43 | 15.57 | 16.01 | 5.25E-19 | 4.53E-14 | 6.68E-14 | 2.91E-05 | 6.86E-01 | 7.63E-05 | 4.13E-03 |
| 118.0413  | 24.7   | 24.03 | 23.77 | 23.70 | 23.44 | 1.71E-03 | 2.94E-01 | 1.08E-01 | 5.42E-04 | 9.64E-01 | 1.27E-01 | 2.99E-01 |
| 118.05095 | 27.14  | 21.86 | 21.49 | 21.76 | 21.70 | 6.86E-05 | 2.30E-05 | 5.90E-01 | 2.07E-01 | 4.12E-03 | 5.06E-02 | 8.85E-01 |
| 118.05893 | 140.25 | 15.36 | 14.34 | 14.51 | 14.99 | 1.57E-11 | 1.22E-10 | 6.13E-08 | 6.42E-02 | 6.61E-01 | 1.64E-04 | 8.64E-03 |
| 118.91803 | 289.55 | 12.45 | 17.65 | 17.95 | 18.74 | 1.05E-55 | 5.11E-15 | 5.11E-15 | 5.11E-15 | 7.97E-01 | 6.29E-03 | 7.45E-02 |
| 118.92675 | 290.57 | 13.84 | 14.82 | 13.69 | 15.80 | 1.16E-06 | 6.90E-02 | 9.80E-01 | 1.69E-05 | 2.93E-02 | 9.19E-02 | 4.79E-06 |



|           |        |       |       |       |       |          |          |          |          |          |          |          |
|-----------|--------|-------|-------|-------|-------|----------|----------|----------|----------|----------|----------|----------|
| 118.9307  | 32.6   | 21.25 | 19.89 | 20.13 | 20.02 | 2.22E-08 | 1.56E-07 | 1.78E-05 | 4.38E-06 | 7.47E-01 | 9.56E-01 | 9.67E-01 |
| 118.94197 | 109.31 | 18.85 | 19.13 | 19.03 | 18.74 | 8.12E-02 | 2.85E-01 | 6.58E-01 | 8.93E-01 | 9.23E-01 | 8.39E-02 | 2.82E-01 |
| 118.95153 | 152.16 | 16.75 | 15.47 | 14.84 | 15.99 | 1.16E-26 | 8.13E-14 | 5.33E-15 | 1.14E-05 | 3.84E-04 | 8.82E-03 | 6.24E-11 |
| 118.9576  | 83.51  | 15.87 | 15.63 | 15.65 | 15.23 | 1.62E-06 | 1.24E-01 | 1.81E-01 | 2.56E-07 | 9.97E-01 | 4.00E-03 | 1.86E-03 |
| 118.96936 | 146.97 | 16.88 | 14.73 | 14.30 | 15.46 | 1.76E-44 | 5.11E-15 | 5.11E-15 | 4.42E-14 | 2.51E-02 | 3.27E-05 | 1.13E-11 |
| 118.97921 | 29.21  | 14.84 | 14.67 | 14.06 | 14.06 | 1.04E-03 | 8.93E-01 | 6.02E-03 | 7.82E-03 | 6.04E-02 | 6.83E-02 | 1.00E+00 |
| 119.01693 | 292.36 | 16.55 | 16.72 | 16.64 | 15.96 | 4.59E-07 | 5.80E-01 | 8.90E-01 | 1.40E-04 | 9.46E-01 | 9.93E-07 | 1.03E-05 |
| 119.02489 | 286.3  | 18.87 | 17.84 | 17.89 | 17.75 | 2.11E-22 | 4.46E-14 | 4.43E-14 | 4.35E-14 | 9.80E-01 | 8.30E-01 | 6.03E-01 |
| 119.03505 | 26.3   | 21.07 | 21.18 | 20.80 | 20.96 | 3.40E-03 | 6.73E-01 | 4.66E-02 | 7.31E-01 | 1.88E-03 | 1.65E-01 | 4.60E-01 |
| 119.03556 | 289.29 | 19.08 | 17.92 | 17.86 | 18.53 | 1.89E-20 | 4.33E-14 | 4.35E-14 | 2.20E-04 | 9.77E-01 | 5.85E-05 | 8.33E-06 |
| 119.0443  | 291.43 | 17.40 | 16.37 | 16.35 | 15.93 | 4.55E-09 | 3.56E-05 | 1.92E-05 | 4.22E-09 | 1.00E+00 | 2.41E-01 | 2.75E-01 |
| 119.04872 | 291.18 | 18.02 | 16.48 | 16.44 | 16.66 | 2.43E-33 | 5.33E-15 | 5.11E-15 | 3.35E-14 | 9.94E-01 | 5.15E-01 | 3.56E-01 |
| 119.05443 | 25.6   | 16.42 | 15.79 | 16.00 | 16.10 | 8.50E-09 | 1.94E-09 | 7.46E-05 | 7.01E-03 | 1.50E-01 | 1.27E-02 | 7.31E-01 |
| 119.06133 | 261.87 | 19.21 | 16.85 | 17.08 | 16.93 | 2.10E-62 | 5.11E-15 | 5.11E-15 | 5.11E-15 | 1.75E-01 | 9.14E-01 | 5.42E-01 |
| 119.94685 | 153.07 | 16.19 | 14.32 | 14.08 | 14.96 | 1.24E-25 | 4.20E-14 | 1.29E-14 | 3.25E-09 | 5.69E-01 | 5.68E-03 | 3.96E-05 |
| 119.97591 | 292.55 | 15.30 | 16.71 | 16.28 | 16.96 | 2.38E-06 | 7.60E-05 | 1.12E-02 | 4.16E-06 | 5.32E-01 | 8.81E-01 | 1.68E-01 |
| 120.01252 | 24.22  | 18.69 | 17.17 | 17.62 | 17.63 | 5.86E-14 | 8.35E-14 | 5.77E-08 | 2.11E-07 | 7.70E-02 | 8.40E-02 | 1.00E+00 |
| 120.02013 | 288.92 | 19.78 | 19.03 | 19.24 | 18.69 | 1.66E-21 | 2.65E-12 | 4.23E-07 | 2.69E-14 | 1.44E-01 | 4.55E-03 | 6.11E-07 |
| 120.03017 | 121.29 | 14.90 | 14.15 | 14.03 | 14.73 | 2.05E-11 | 3.19E-07 | 1.45E-09 | 5.95E-01 | 7.92E-01 | 3.05E-04 | 5.20E-06 |
| 120.0329  | 210.05 | 14.51 | 10.22 | 9.77  | 9.23  | 8.37E-11 | 7.60E-07 | 3.03E-08 | 2.45E-09 | 9.44E-01 | 6.33E-01 | 9.13E-01 |
| 120.03835 | 22.31  | 15.90 | 15.50 | 15.62 | 15.74 | 9.20E-03 | 5.35E-03 | 9.45E-02 | 5.51E-01 | 7.41E-01 | 2.38E-01 | 7.99E-01 |
| 120.04416 | 289.98 | 16.53 | 13.66 | 13.60 | 13.50 | 3.24E-27 | 4.02E-14 | 3.46E-14 | 3.49E-14 | 9.97E-01 | 9.42E-01 | 9.83E-01 |
| 120.04862 | 126.48 | 15.04 | 14.32 | 14.98 | 14.67 | 1.40E-04 | 1.94E-04 | 9.81E-01 | 1.54E-01 | 1.14E-03 | 2.03E-01 | 3.24E-01 |
| 120.05662 | 268.14 | 23.11 | 21.23 | 21.54 | 21.56 | 6.70E-36 | 5.11E-15 | 6.88E-15 | 1.42E-14 | 9.77E-02 | 7.83E-02 | 9.98E-01 |
| 120.05681 | 29.96  | 20.39 | 19.03 | 19.28 | 19.04 | 3.60E-20 | 4.33E-14 | 3.21E-12 | 4.33E-14 | 3.16E-01 | 1.00E+00 | 4.00E-01 |
| 120.06643 | 282.72 | 21.48 | 19.62 | 19.37 | 20.26 | 6.03E-17 | 1.11E-12 | 4.42E-14 | 7.13E-06 | 7.37E-01 | 5.04E-02 | 2.18E-03 |
| 120.92775 | 43.01  | 19.95 | 17.59 | 18.37 | 18.30 | 6.35E-21 | 3.40E-14 | 4.16E-11 | 2.74E-11 | 3.10E-03 | 1.25E-02 | 9.89E-01 |
| 120.94453 | 163.98 | 13.45 | 10.77 | 11.99 | 11.76 | 1.43E-11 | 1.77E-12 | 1.52E-04 | 1.89E-05 | 3.76E-03 | 3.54E-02 | 9.25E-01 |
| 120.94865 | 135.67 | 14.44 | 13.39 | 14.53 | 14.08 | 1.27E-04 | 5.47E-04 | 9.87E-01 | 5.56E-01 | 2.04E-04 | 6.37E-02 | 3.77E-01 |
| 121.00418 | 292.12 | 15.87 | 15.90 | 15.95 | 15.17 | 2.66E-03 | 9.99E-01 | 9.83E-01 | 1.16E-02 | 9.97E-01 | 9.71E-03 | 4.54E-03 |
| 121.0043  | 91.72  | 15.60 | 13.60 | 13.91 | 14.15 | 2.36E-38 | 5.11E-15 | 5.11E-15 | 3.29E-14 | 9.97E-02 | 4.53E-04 | 2.72E-01 |
| 121.01543 | 291.53 | 15.19 | 16.04 | 16.02 | 14.71 | 2.93E-05 | 2.73E-02 | 3.05E-02 | 4.13E-01 | 1.00E+00 | 2.56E-04 | 2.86E-04 |
| 121.0156  | 196.72 | 14.44 | 14.06 | 14.35 | 10.37 | 3.06E-14 | 8.82E-01 | 9.98E-01 | 1.80E-12 | 9.47E-01 | 4.08E-10 | 1.22E-11 |
| 121.01591 | 20.98  | 19.16 | 18.11 | 18.25 | 17.27 | 1.48E-20 | 1.35E-08 | 7.83E-07 | 2.71E-14 | 8.47E-01 | 1.71E-05 | 3.12E-07 |
| 121.02936 | 280.91 | 21.80 | 22.02 | 20.98 | 21.43 | 2.94E-08 | 5.43E-01 | 1.13E-05 | 1.39E-01 | 3.54E-08 | 5.08E-03 | 5.93E-02 |
| 121.03253 | 286.96 | 16.44 | 16.58 | 16.44 | 16.86 | 4.07E-03 | 6.84E-01 | 1.00E+00 | 5.51E-03 | 7.07E-01 | 1.29E-01 | 7.12E-03 |
| 121.03255 | 217.42 | 17.65 | 16.71 | 16.80 | 16.82 | 1.30E-09 | 2.47E-08 | 3.94E-07 | 1.80E-06 | 9.40E-01 | 9.10E-01 | 1.00E+00 |
| 121.04053 | 291.94 | 19.20 | 17.64 | 18.03 | 18.05 | 1.93E-30 | 5.11E-15 | 4.15E-14 | 4.37E-14 | 7.28E-03 | 5.89E-03 | 9.98E-01 |
| 121.04069 | 26.27  | 17.65 | 15.99 | 15.48 | 15.87 | 1.51E-46 | 5.11E-15 | 5.11E-15 | 5.11E-15 | 3.11E-04 | 7.89E-01 | 1.23E-02 |
| 121.05178 | 287.98 | 22.61 | 20.97 | 21.01 | 20.91 | 1.23E-35 | 5.11E-15 | 5.33E-15 | 5.11E-15 | 9.95E-01 | 9.64E-01 | 8.87E-01 |
| 121.05987 | 287.33 | 17.81 | 16.37 | 16.33 | 16.62 | 1.95E-32 | 5.77E-15 | 5.11E-15 | 4.13E-14 | 9.89E-01 | 1.53E-01 | 7.34E-02 |
| 121.05997 | 93     | 16.15 | 14.12 | 14.11 | 15.03 | 7.15E-38 | 5.11E-15 | 5.11E-15 | 4.32E-12 | 1.00E+00 | 4.94E-08 | 2.43E-08 |
| 121.06573 | 142.6  | 15.02 | 13.08 | 13.24 | 13.57 | 2.18E-30 | 5.33E-15 | 1.15E-14 | 4.22E-14 | 7.38E-01 | 1.46E-02 | 1.70E-01 |
| 121.06983 | 175.39 | 16.27 | 15.52 | 15.27 | 15.92 | 1.72E-12 | 2.28E-07 | 2.86E-12 | 4.67E-02 | 2.37E-01 | 2.39E-02 | 2.45E-05 |
| 121.94393 | 149.2  | 14.69 | 11.44 | 11.44 | 13.27 | 1.38E-11 | 1.58E-09 | 1.15E-09 | 2.60E-02 | 1.00E+00 | 2.85E-03 | 2.62E-03 |

|           |        |       |       |       |       |          |          |          |          |          |          |          |
|-----------|--------|-------|-------|-------|-------|----------|----------|----------|----------|----------|----------|----------|
| 121.99203 | 24.29  | 16.66 | 15.04 | 14.89 | 15.41 | 1.55E-11 | 6.10E-09 | 1.32E-10 | 1.70E-05 | 9.33E-01 | 5.15E-01 | 2.02E-01 |
| 121.99943 | 292.73 | 16.27 | 16.41 | 16.25 | 16.21 | 7.90E-01 | 8.89E-01 | 1.00E+00 | 9.92E-01 | 8.59E-01 | 7.76E-01 | 9.97E-01 |
| 122.02464 | 232.49 | 19.03 | 18.68 | 18.60 | 18.86 | 2.66E-01 | 4.53E-01 | 2.48E-01 | 8.96E-01 | 9.84E-01 | 8.90E-01 | 7.07E-01 |
| 122.03273 | 284.58 | 17.43 | 17.62 | 16.95 | 17.38 | 4.02E-07 | 3.74E-01 | 1.40E-04 | 9.69E-01 | 1.60E-07 | 2.03E-01 | 1.90E-03 |
| 122.03579 | 289.63 | 22.08 | 20.78 | 20.86 | 20.71 | 1.05E-35 | 5.11E-15 | 6.22E-15 | 5.11E-15 | 8.58E-01 | 9.22E-01 | 4.95E-01 |
| 122.03595 | 19.38  | 18.86 | 16.81 | 17.03 | 17.28 | 4.38E-43 | 5.11E-15 | 5.11E-15 | 6.22E-15 | 3.08E-01 | 2.55E-03 | 2.32E-01 |
| 122.04506 | 25.09  | 18.79 | 18.49 | 18.46 | 18.16 | 8.96E-04 | 1.88E-01 | 1.05E-01 | 2.43E-04 | 9.94E-01 | 1.37E-01 | 2.15E-01 |
| 122.05517 | 293.96 | 17.16 | 16.68 | 16.56 | 16.45 | 2.27E-03 | 6.88E-02 | 1.13E-02 | 2.75E-03 | 9.30E-01 | 6.86E-01 | 9.53E-01 |
| 122.06102 | 190.57 | 15.88 | 14.61 | 14.67 | 15.03 | 4.69E-21 | 4.22E-14 | 4.20E-14 | 5.55E-09 | 9.72E-01 | 1.17E-02 | 3.75E-02 |
| 122.92593 | 63.02  | 15.69 | 13.38 | 13.60 | 13.76 | 6.89E-26 | 2.24E-14 | 4.29E-14 | 4.34E-14 | 7.13E-01 | 3.10E-01 | 8.93E-01 |
| 122.96017 | 68.2   | 14.38 | 15.39 | 12.84 | 13.35 | 2.93E-94 | 5.11E-15 | 5.11E-15 | 5.11E-15 | 5.11E-15 | 5.11E-15 | 6.18E-10 |
| 122.96819 | 144.15 | 15.76 | 14.33 | 12.88 | 13.48 | 1.23E-15 | 1.07E-04 | 4.30E-14 | 6.05E-10 | 1.39E-04 | 6.99E-02 | 3.07E-01 |
| 122.97555 | 290.35 | 18.30 | 16.53 | 16.48 | 17.59 | 4.04E-27 | 3.26E-14 | 2.11E-14 | 1.94E-04 | 9.92E-01 | 2.09E-08 | 3.50E-09 |
| 122.97596 | 20.58  | 15.35 | 15.81 | 15.80 | 16.10 | 3.66E-07 | 1.48E-03 | 1.93E-03 | 8.95E-08 | 1.00E+00 | 1.25E-01 | 9.57E-02 |
| 122.98534 | 28.24  | 16.14 | 18.86 | 18.90 | 18.10 | 2.36E-62 | 5.11E-15 | 5.11E-15 | 5.11E-15 | 9.87E-01 | 4.88E-07 | 7.05E-08 |
| 123.00857 | 290.47 | 17.35 | 17.49 | 17.62 | 17.54 | 7.39E-02 | 5.53E-01 | 4.60E-02 | 3.11E-01 | 5.93E-01 | 9.73E-01 | 8.61E-01 |
| 123.01979 | 292.39 | 18.86 | 18.05 | 18.24 | 17.90 | 5.56E-15 | 6.06E-11 | 4.99E-07 | 1.01E-13 | 3.47E-01 | 5.77E-01 | 2.07E-02 |
| 123.03102 | 291.4  | 17.69 | 16.35 | 16.45 | 16.30 | 1.73E-33 | 5.33E-15 | 1.29E-14 | 5.33E-15 | 7.55E-01 | 9.83E-01 | 5.39E-01 |
| 123.0392  | 290.39 | 16.45 | 14.86 | 15.37 | 15.39 | 6.13E-07 | 2.21E-07 | 7.24E-04 | 1.53E-03 | 2.75E-01 | 2.72E-01 | 1.00E+00 |
| 123.04501 | 202.46 | 17.01 | 16.24 | 16.04 | 16.34 | 2.85E-11 | 1.95E-07 | 3.44E-11 | 1.45E-05 | 4.67E-01 | 8.87E-01 | 1.41E-01 |
| 123.04864 | 25.13  | 23.55 | 23.49 | 23.40 | 23.07 | 8.85E-03 | 9.68E-01 | 7.15E-01 | 6.30E-03 | 9.39E-01 | 3.09E-02 | 1.19E-01 |
| 123.05619 | 280.63 | 20.49 | 18.65 | 18.77 | 18.50 | 4.86E-44 | 5.11E-15 | 5.11E-15 | 5.11E-15 | 7.71E-01 | 6.72E-01 | 1.64E-01 |
| 123.05631 | 23.22  | 17.96 | 16.46 | 16.39 | 16.88 | 6.90E-36 | 5.11E-15 | 5.11E-15 | 4.39E-14 | 9.26E-01 | 3.28E-03 | 3.10E-04 |
| 123.06754 | 219.98 | 17.22 | 11.69 | 10.98 | 11.74 | 4.46E-26 | 4.23E-14 | 1.98E-14 | 4.24E-14 | 5.98E-01 | 1.00E+00 | 5.66E-01 |
| 123.08141 | 185.69 | 16.03 | 15.31 | 15.49 | 15.86 | 1.51E-12 | 1.72E-11 | 3.19E-07 | 3.33E-01 | 2.85E-01 | 1.17E-06 | 1.65E-03 |
| 123.90193 | 180.04 | 15.16 | 14.82 | 14.93 | 14.59 | 3.76E-02 | 2.92E-01 | 6.10E-01 | 2.03E-02 | 9.49E-01 | 6.52E-01 | 3.27E-01 |
| 123.90229 | 24.07  | 16.92 | 17.22 | 16.33 | 16.98 | 7.07E-02 | 8.15E-01 | 2.83E-01 | 9.99E-01 | 4.91E-02 | 9.05E-01 | 2.54E-01 |
| 123.92302 | 23.25  | 16.32 | 16.41 | 16.41 | 16.21 | 7.12E-03 | 5.10E-01 | 5.27E-01 | 2.57E-01 | 1.00E+00 | 1.15E-02 | 1.19E-02 |
| 123.92658 | 23.49  | 16.04 | 16.07 | 15.94 | 15.82 | 3.14E-02 | 9.90E-01 | 6.53E-01 | 6.24E-02 | 4.84E-01 | 3.48E-02 | 5.28E-01 |
| 123.9623  | 23.74  | 15.98 | 16.00 | 15.78 | 15.66 | 1.88E-02 | 9.98E-01 | 3.45E-01 | 4.53E-02 | 2.82E-01 | 3.51E-02 | 7.49E-01 |
| 123.98902 | 23.74  | 16.08 | 16.10 | 16.12 | 15.90 | 6.54E-01 | 1.00E+00 | 9.96E-01 | 7.66E-01 | 9.99E-01 | 7.35E-01 | 6.48E-01 |
| 124.00392 | 95.29  | 14.99 | 12.05 | 11.66 | 12.99 | 6.54E-23 | 4.31E-14 | 3.31E-14 | 1.27E-08 | 6.07E-01 | 2.24E-02 | 3.27E-04 |
| 124.00742 | 26.24  | 28.29 | 28.92 | 28.78 | 28.60 | 5.94E-16 | 4.40E-14 | 1.72E-10 | 1.86E-04 | 2.07E-01 | 1.24E-04 | 6.71E-02 |
| 124.01504 | 290.9  | 17.34 | 17.41 | 17.33 | 17.01 | 1.39E-02 | 9.27E-01 | 1.00E+00 | 5.13E-02 | 9.22E-01 | 1.19E-02 | 6.21E-02 |
| 124.01541 | 27.35  | 16.58 | 15.76 | 15.94 | 16.13 | 2.16E-04 | 1.36E-04 | 4.69E-03 | 1.05E-01 | 7.76E-01 | 2.41E-01 | 7.71E-01 |
| 124.0155  | 99.99  | 15.97 | 14.26 | 14.57 | 14.84 | 2.49E-31 | 5.11E-15 | 2.33E-14 | 4.86E-14 | 7.89E-02 | 1.26E-04 | 1.79E-01 |
| 124.02692 | 23.67  | 16.37 | 16.57 | 16.53 | 15.67 | 1.09E-04 | 7.58E-01 | 8.59E-01 | 5.01E-03 | 9.97E-01 | 2.21E-04 | 4.16E-04 |
| 124.0403  | 236.88 | 19.81 | 19.15 | 19.07 | 19.81 | 1.35E-04 | 9.12E-03 | 2.23E-03 | 1.00E+00 | 9.82E-01 | 1.46E-02 | 4.12E-03 |
| 124.05152 | 261.79 | 22.24 | 19.97 | 20.17 | 20.05 | 6.90E-65 | 5.11E-15 | 5.11E-15 | 5.11E-15 | 2.52E-01 | 8.80E-01 | 7.16E-01 |
| 124.05781 | 27.86  | 15.94 | 16.37 | 16.35 | 15.91 | 1.53E-02 | 8.51E-02 | 1.03E-01 | 9.99E-01 | 1.00E+00 | 8.23E-02 | 9.94E-02 |
| 124.08848 | 23.52  | 15.95 | 15.82 | 15.93 | 15.75 | 2.45E-01 | 6.23E-01 | 9.97E-01 | 2.73E-01 | 7.53E-01 | 9.28E-01 | 3.88E-01 |
| 124.09201 | 23.32  | 16.30 | 16.36 | 16.35 | 16.20 | 4.20E-02 | 7.03E-01 | 8.50E-01 | 3.31E-01 | 9.93E-01 | 4.05E-02 | 7.51E-02 |
| 124.98792 | 121.93 | 15.21 | 14.61 | 14.77 | 15.07 | 2.60E-05 | 4.19E-05 | 3.76E-03 | 6.95E-01 | 6.51E-01 | 6.18E-03 | 1.28E-01 |
| 124.98796 | 26.32  | 15.81 | 14.89 | 14.82 | 15.39 | 5.25E-13 | 5.61E-10 | 1.79E-11 | 1.34E-02 | 9.57E-01 | 3.35E-03 | 4.90E-04 |
| 124.99129 | 17.16  | 19.78 | 20.20 | 19.72 | 19.83 | 3.71E-05 | 3.82E-04 | 9.35E-01 | 9.55E-01 | 4.97E-05 | 5.14E-03 | 7.10E-01 |

|           |        |       |       |       |       |          |          |          |          |          |          |          |
|-----------|--------|-------|-------|-------|-------|----------|----------|----------|----------|----------|----------|----------|
| 124.99902 | 290.73 | 17.18 | 16.66 | 16.81 | 16.28 | 3.09E-06 | 6.58E-03 | 1.01E-01 | 6.79E-07 | 7.62E-01 | 1.20E-01 | 8.54E-03 |
| 125.00438 | 19.08  | 19.52 | 19.72 | 19.68 | 19.61 | 8.29E-05 | 9.49E-05 | 1.93E-03 | 2.82E-01 | 8.59E-01 | 7.22E-02 | 3.30E-01 |
| 125.00666 | 22.66  | 20.89 | 21.13 | 21.06 | 20.98 | 1.82E-06 | 1.33E-06 | 7.19E-04 | 2.47E-01 | 4.70E-01 | 7.10E-03 | 2.44E-01 |
| 125.01064 | 22.69  | 22.76 | 23.02 | 22.94 | 22.82 | 4.08E-05 | 4.12E-05 | 1.13E-02 | 7.32E-01 | 4.44E-01 | 4.99E-03 | 2.16E-01 |
| 125.01347 | 26.04  | 16.47 | 16.84 | 16.88 | 16.54 | 7.42E-03 | 4.99E-02 | 1.77E-02 | 9.56E-01 | 9.87E-01 | 2.09E-01 | 1.01E-01 |
| 125.01772 | 25.15  | 17.37 | 17.75 | 18.49 | 17.84 | 1.42E-16 | 7.14E-03 | 4.35E-14 | 7.53E-04 | 2.15E-08 | 8.96E-01 | 1.73E-06 |
| 125.02425 | 261.93 | 17.63 | 17.57 | 17.76 | 17.58 | 4.23E-01 | 9.59E-01 | 7.23E-01 | 9.75E-01 | 4.35E-01 | 1.00E+00 | 4.99E-01 |
| 125.03546 | 291.46 | 18.80 | 18.26 | 18.37 | 18.05 | 5.09E-06 | 8.54E-04 | 1.04E-02 | 2.60E-06 | 8.82E-01 | 4.96E-01 | 1.44E-01 |
| 125.03559 | 215.74 | 20.48 | 17.58 | 17.46 | 17.00 | 3.02E-34 | 1.47E-14 | 7.11E-15 | 5.11E-15 | 9.68E-01 | 1.40E-01 | 3.15E-01 |
| 125.03561 | 38.89  | 18.68 | 17.65 | 17.08 | 17.55 | 3.65E-16 | 7.98E-08 | 4.39E-14 | 1.03E-08 | 8.39E-03 | 9.54E-01 | 4.83E-02 |
| 125.04756 | 209.46 | 14.09 | 7.31  | 7.92  | 8.17  | 1.35E-26 | 2.00E-14 | 4.02E-14 | 4.33E-14 | 7.44E-01 | 5.28E-01 | 9.81E-01 |
| 125.05258 | 32.07  | 15.44 | 14.83 | 15.06 | 14.73 | 3.24E-03 | 1.48E-02 | 2.39E-01 | 3.64E-03 | 6.68E-01 | 9.60E-01 | 3.76E-01 |
| 125.06064 | 289.61 | 16.26 | 16.20 | 16.34 | 16.34 | 7.37E-01 | 9.80E-01 | 9.33E-01 | 9.39E-01 | 7.74E-01 | 7.90E-01 | 1.00E+00 |
| 125.07198 | 213.16 | 14.31 | 10.95 | 10.19 | 10.37 | 5.31E-07 | 2.38E-04 | 3.02E-06 | 1.92E-05 | 7.92E-01 | 9.05E-01 | 9.96E-01 |
| 125.097   | 295.24 | 16.78 | 16.76 | 16.70 | 16.83 | 6.50E-01 | 9.96E-01 | 8.35E-01 | 9.64E-01 | 9.33E-01 | 9.06E-01 | 5.86E-01 |
| 125.89984 | 29.91  | 15.72 | 16.15 | 14.68 | 15.51 | 1.05E-02 | 7.43E-01 | 7.70E-02 | 9.67E-01 | 5.46E-03 | 4.96E-01 | 2.60E-01 |
| 125.90248 | 118.4  | 12.74 | 13.96 | 14.00 | 14.00 | 8.28E-15 | 5.66E-11 | 1.08E-11 | 4.59E-11 | 9.97E-01 | 9.97E-01 | 1.00E+00 |
| 126.00312 | 23.14  | 23.98 | 24.23 | 24.18 | 24.04 | 1.55E-04 | 3.58E-04 | 5.11E-03 | 7.57E-01 | 8.79E-01 | 2.05E-02 | 1.23E-01 |
| 126.0115  | 23     | 20.81 | 21.05 | 20.98 | 20.86 | 2.37E-05 | 3.91E-05 | 4.37E-03 | 7.36E-01 | 6.15E-01 | 4.70E-03 | 1.21E-01 |
| 126.01947 | 293.51 | 16.95 | 16.93 | 16.79 | 17.33 | 5.05E-03 | 1.00E+00 | 7.00E-01 | 5.18E-02 | 7.69E-01 | 5.00E-02 | 2.61E-03 |
| 126.02775 | 116.44 | 14.47 | 12.68 | 12.95 | 13.37 | 5.28E-11 | 1.56E-10 | 3.68E-08 | 2.13E-04 | 7.42E-01 | 5.35E-02 | 3.83E-01 |
| 126.03069 | 290.74 | 16.92 | 16.86 | 16.97 | 16.60 | 3.23E-02 | 9.69E-01 | 9.76E-01 | 6.80E-02 | 8.33E-01 | 2.02E-01 | 2.73E-02 |
| 126.03078 | 174.15 | 17.43 | 16.22 | 14.55 | 14.80 | 2.56E-10 | 3.42E-02 | 2.27E-09 | 1.47E-07 | 1.58E-03 | 1.41E-02 | 9.50E-01 |
| 126.03899 | 93.83  | 15.65 | 12.78 | 13.02 | 13.65 | 1.48E-27 | 8.66E-15 | 2.89E-14 | 3.51E-13 | 7.46E-01 | 3.90E-03 | 6.52E-02 |
| 126.05592 | 208.88 | 17.53 | 16.85 | 16.68 | 16.99 | 3.04E-13 | 6.41E-09 | 4.54E-13 | 1.11E-05 | 4.23E-01 | 5.78E-01 | 3.01E-02 |
| 126.10044 | 131.71 | 15.00 | 13.25 | 13.23 | 13.84 | 6.89E-17 | 8.53E-14 | 5.82E-14 | 8.94E-07 | 1.00E+00 | 4.21E-02 | 3.17E-02 |
| 126.90483 | 290.93 | 19.00 | 19.45 | 18.94 | 19.65 | 4.53E-04 | 7.55E-02 | 9.89E-01 | 4.46E-03 | 3.93E-02 | 7.46E-01 | 1.99E-03 |
| 126.90496 | 175.34 | 17.65 | 20.73 | 14.72 | 15.71 | 5.95E-39 | 1.01E-13 | 5.28E-13 | 4.43E-06 | 5.11E-15 | 5.11E-15 | 5.42E-02 |
| 126.98729 | 21.15  | 15.06 | 14.88 | 14.22 | 14.60 | 1.37E-01 | 9.61E-01 | 1.09E-01 | 6.33E-01 | 3.15E-01 | 8.99E-01 | 7.62E-01 |
| 127.00126 | 51.54  | 24.57 | 23.99 | 24.23 | 24.28 | 2.12E-04 | 5.25E-05 | 4.02E-02 | 1.23E-01 | 2.47E-01 | 1.38E-01 | 9.84E-01 |
| 127.00339 | 135.19 | 15.65 | 16.15 | 15.56 | 15.90 | 9.59E-02 | 1.89E-01 | 9.83E-01 | 7.60E-01 | 9.60E-02 | 7.80E-01 | 5.57E-01 |
| 127.00655 | 23.05  | 17.64 | 17.82 | 17.83 | 17.60 | 7.41E-04 | 4.19E-02 | 1.83E-02 | 9.50E-01 | 9.94E-01 | 1.41E-02 | 5.75E-03 |
| 127.01472 | 291.9  | 17.95 | 17.95 | 17.72 | 18.39 | 2.79E-03 | 1.00E+00 | 5.12E-01 | 5.50E-02 | 5.29E-01 | 6.78E-02 | 1.03E-03 |
| 127.02321 | 21.96  | 14.54 | 14.50 | 13.00 | 14.08 | 2.79E-02 | 1.00E+00 | 3.26E-02 | 8.55E-01 | 4.82E-02 | 8.92E-01 | 2.66E-01 |
| 127.03991 | 287.62 | 17.45 | 17.24 | 17.23 | 17.43 | 3.20E-02 | 1.27E-01 | 9.48E-02 | 9.99E-01 | 1.00E+00 | 2.13E-01 | 1.69E-01 |
| 127.0508  | 199.65 | 18.61 | 16.20 | 15.81 | 16.59 | 1.41E-35 | 5.77E-15 | 5.11E-15 | 4.13E-14 | 2.07E-01 | 2.43E-01 | 1.08E-03 |
| 127.05116 | 291.46 | 17.27 | 17.03 | 17.13 | 17.29 | 4.01E-03 | 1.10E-02 | 2.88E-01 | 9.96E-01 | 5.43E-01 | 9.22E-03 | 2.30E-01 |
| 127.0595  | 20.08  | 14.18 | 14.29 | 13.95 | 13.65 | 5.81E-01 | 9.96E-01 | 9.55E-01 | 6.80E-01 | 8.91E-01 | 5.69E-01 | 9.30E-01 |
| 127.07629 | 292.36 | 16.89 | 16.75 | 16.80 | 16.78 | 6.30E-01 | 5.93E-01 | 8.59E-01 | 7.74E-01 | 9.67E-01 | 9.94E-01 | 9.98E-01 |
| 127.11269 | 172.09 | 16.95 | 16.02 | 16.23 | 16.41 | 2.22E-12 | 2.16E-12 | 3.13E-08 | 1.07E-04 | 3.35E-01 | 1.26E-02 | 4.63E-01 |
| 127.89733 | 29.26  | 14.42 | 13.97 | 13.05 | 13.90 | 2.53E-03 | 5.91E-01 | 9.21E-04 | 4.95E-01 | 6.34E-02 | 9.98E-01 | 1.12E-01 |
| 127.90174 | 107.85 | 12.97 | 14.94 | 15.28 | 15.01 | 7.97E-34 | 1.53E-14 | 5.11E-15 | 1.29E-14 | 2.16E-01 | 9.77E-01 | 4.54E-01 |
| 127.99903 | 20.37  | 14.48 | 16.55 | 15.42 | 16.18 | 1.89E-07 | 2.29E-07 | 4.49E-02 | 4.73E-05 | 1.43E-02 | 7.75E-01 | 1.93E-01 |
| 128.00446 | 183.29 | 17.66 | 16.80 | 16.85 | 17.25 | 1.18E-12 | 4.35E-11 | 4.12E-10 | 5.21E-03 | 9.72E-01 | 2.15E-03 | 8.24E-03 |
| 128.00756 | 23.63  | 16.14 | 15.93 | 15.73 | 16.01 | 2.26E-03 | 2.25E-01 | 8.68E-04 | 6.54E-01 | 2.45E-01 | 9.01E-01 | 6.02E-02 |

|           |        |       |       |       |       |          |          |          |          |          |          |          |
|-----------|--------|-------|-------|-------|-------|----------|----------|----------|----------|----------|----------|----------|
| 128.01815 | 137.78 | 14.80 | 14.24 | 14.18 | 14.92 | 4.53E-08 | 5.06E-04 | 6.82E-05 | 8.43E-01 | 9.71E-01 | 4.38E-05 | 5.29E-06 |
| 128.03514 | 291.92 | 20.51 | 21.41 | 21.42 | 21.06 | 6.48E-08 | 1.10E-06 | 4.79E-07 | 8.39E-03 | 9.99E-01 | 1.95E-01 | 1.51E-01 |
| 128.03545 | 17.36  | 23.56 | 23.57 | 23.57 | 24.00 | 3.24E-04 | 9.99E-01 | 1.00E+00 | 8.79E-04 | 1.00E+00 | 2.08E-03 | 1.65E-03 |
| 128.04477 | 170.05 | 21.52 | 20.77 | 20.84 | 21.21 | 2.33E-01 | 2.55E-01 | 3.41E-01 | 8.84E-01 | 9.98E-01 | 7.27E-01 | 8.22E-01 |
| 128.0448  | 234.29 | 18.89 | 19.27 | 18.97 | 19.37 | 5.75E-01 | 7.53E-01 | 9.96E-01 | 6.22E-01 | 8.75E-01 | 9.95E-01 | 7.66E-01 |
| 128.05279 | 199.87 | 18.30 | 19.98 | 19.95 | 19.70 | 4.48E-08 | 7.78E-07 | 9.60E-07 | 8.39E-05 | 1.00E+00 | 8.28E-01 | 8.67E-01 |
| 128.07154 | 290.5  | 16.28 | 16.05 | 16.13 | 16.27 | 3.66E-01 | 4.08E-01 | 7.44E-01 | 1.00E+00 | 9.49E-01 | 4.95E-01 | 8.09E-01 |
| 128.87005 | 60.8   | 14.54 | 12.98 | 14.02 | 14.07 | 3.12E-07 | 7.04E-08 | 2.00E-01 | 3.17E-01 | 7.63E-04 | 6.10E-04 | 9.98E-01 |
| 128.95953 | 50.19  | 27.15 | 27.54 | 28.01 | 27.88 | 5.85E-24 | 5.18E-06 | 2.18E-14 | 4.25E-14 | 8.02E-08 | 2.47E-04 | 4.13E-01 |
| 128.9797  | 63.17  | 18.82 | 19.00 | 18.42 | 18.71 | 3.26E-02 | 7.88E-01 | 1.60E-01 | 9.47E-01 | 1.89E-02 | 4.90E-01 | 4.76E-01 |
| 129.00542 | 180.48 | 15.46 | 14.35 | 14.35 | 14.68 | 2.01E-11 | 1.05E-09 | 7.82E-10 | 5.11E-05 | 1.00E+00 | 2.24E-01 | 2.21E-01 |
| 129.00693 | 33.33  | 18.72 | 18.63 | 18.54 | 18.27 | 2.99E-02 | 9.17E-01 | 6.18E-01 | 1.80E-02 | 9.47E-01 | 1.10E-01 | 3.01E-01 |
| 129.01681 | 175.79 | 16.66 | 18.61 | 17.80 | 18.35 | 1.38E-05 | 1.59E-05 | 2.63E-02 | 3.98E-04 | 1.99E-01 | 9.25E-01 | 5.61E-01 |
| 129.01692 | 62.63  | 17.07 | 16.67 | 16.61 | 16.65 | 2.79E-01 | 4.37E-01 | 3.15E-01 | 4.20E-01 | 9.97E-01 | 1.00E+00 | 9.99E-01 |
| 129.0194  | 25.2   | 23.83 | 24.65 | 24.72 | 24.73 | 5.16E-27 | 4.24E-14 | 2.89E-14 | 3.49E-14 | 8.57E-01 | 8.16E-01 | 1.00E+00 |
| 129.02913 | 291.93 | 16.79 | 17.15 | 17.30 | 17.02 | 1.59E-03 | 3.59E-02 | 7.66E-04 | 3.31E-01 | 6.80E-01 | 7.90E-01 | 1.82E-01 |
| 129.03259 | 20.3   | 15.20 | 13.68 | 13.90 | 14.02 | 2.54E-04 | 3.70E-04 | 2.91E-03 | 1.17E-02 | 9.39E-01 | 8.31E-01 | 9.91E-01 |
| 129.03308 | 291.44 | 17.44 | 15.88 | 15.84 | 15.45 | 7.72E-14 | 8.24E-09 | 2.62E-09 | 1.18E-12 | 9.99E-01 | 3.64E-01 | 4.36E-01 |
| 129.03874 | 20.31  | 19.13 | 18.99 | 19.02 | 19.43 | 2.07E-03 | 6.71E-01 | 7.85E-01 | 5.73E-02 | 9.97E-01 | 2.75E-03 | 4.80E-03 |
| 129.04177 | 140.15 | 15.01 | 15.01 | 15.16 | 14.41 | 3.76E-05 | 1.00E+00 | 7.71E-01 | 9.77E-04 | 7.95E-01 | 1.35E-03 | 3.19E-05 |
| 129.04551 | 59.97  | 15.44 | 12.52 | 14.53 | 14.63 | 2.00E-31 | 5.11E-15 | 7.19E-05 | 9.40E-04 | 4.26E-14 | 4.24E-14 | 9.64E-01 |
| 129.04564 | 290    | 17.68 | 16.16 | 16.13 | 16.16 | 3.28E-31 | 1.27E-14 | 7.33E-15 | 1.78E-14 | 9.91E-01 | 1.00E+00 | 9.96E-01 |
| 129.04916 | 62.21  | 15.01 | 14.84 | 14.23 | 14.37 | 1.10E-04 | 7.90E-01 | 2.77E-04 | 6.47E-03 | 1.10E-02 | 9.76E-02 | 8.94E-01 |
| 129.05555 | 279    | 20.79 | 21.07 | 20.86 | 21.02 | 4.77E-01 | 5.04E-01 | 9.84E-01 | 6.68E-01 | 7.40E-01 | 9.96E-01 | 8.67E-01 |
| 129.09194 | 271.74 | 18.53 | 19.77 | 19.84 | 19.37 | 1.01E-31 | 6.22E-15 | 5.11E-15 | 4.79E-13 | 9.00E-01 | 1.12E-03 | 6.64E-05 |
| 129.12827 | 291.39 | 16.32 | 16.15 | 16.77 | 16.63 | 9.58E-03 | 8.36E-01 | 9.18E-02 | 3.94E-01 | 1.18E-02 | 9.48E-02 | 9.08E-01 |
| 129.9546  | 55.91  | 16.35 | 14.68 | 15.80 | 16.21 | 6.14E-30 | 5.11E-15 | 1.24E-04 | 7.15E-01 | 5.80E-14 | 1.91E-14 | 1.26E-02 |
| 129.96277 | 46.62  | 21.62 | 21.61 | 22.40 | 22.14 | 5.77E-39 | 9.96E-01 | 5.11E-15 | 4.26E-14 | 5.11E-15 | 4.30E-14 | 9.06E-05 |
| 129.97566 | 150.11 | 17.82 | 16.45 | 16.28 | 16.25 | 1.11E-28 | 4.13E-14 | 1.51E-14 | 1.93E-14 | 6.07E-01 | 4.87E-01 | 9.96E-01 |
| 129.97572 | 19.88  | 16.45 | 14.24 | 14.14 | 14.65 | 1.15E-21 | 4.29E-14 | 4.47E-14 | 9.33E-12 | 9.73E-01 | 3.42E-01 | 1.55E-01 |
| 130.01442 | 291.86 | 14.35 | 15.92 | 15.86 | 16.12 | 6.51E-11 | 6.11E-08 | 1.57E-07 | 2.42E-09 | 9.96E-01 | 8.87E-01 | 7.74E-01 |
| 130.01447 | 104.63 | 15.48 | 14.35 | 14.56 | 15.10 | 1.36E-16 | 4.51E-14 | 5.57E-11 | 2.24E-02 | 3.82E-01 | 6.07E-07 | 5.11E-04 |
| 130.01454 | 196.63 | 14.91 | 13.00 | 13.03 | 14.43 | 5.18E-12 | 3.68E-09 | 4.13E-09 | 3.93E-01 | 1.00E+00 | 4.18E-05 | 4.94E-05 |
| 130.02272 | 18.23  | 19.14 | 20.05 | 20.12 | 20.15 | 4.61E-33 | 1.53E-14 | 5.33E-15 | 5.77E-15 | 7.98E-01 | 6.53E-01 | 9.93E-01 |
| 130.02575 | 87.61  | 15.31 | 14.12 | 14.19 | 13.94 | 2.57E-15 | 5.64E-11 | 4.13E-10 | 2.93E-13 | 9.79E-01 | 7.26E-01 | 4.78E-01 |
| 130.02836 | 290.8  | 16.12 | 14.96 | 15.35 | 14.95 | 4.27E-02 | 6.08E-02 | 3.34E-01 | 6.69E-02 | 8.42E-01 | 1.00E+00 | 8.40E-01 |
| 130.03299 | 95.11  | 15.67 | 14.74 | 15.27 | 14.60 | 1.39E-15 | 2.70E-11 | 9.28E-03 | 1.57E-13 | 3.41E-04 | 7.24E-01 | 5.55E-06 |
| 130.03664 | 80.63  | 15.59 | 13.99 | 14.40 | 14.59 | 1.94E-14 | 5.82E-14 | 4.86E-09 | 2.52E-06 | 1.47E-01 | 1.49E-02 | 7.68E-01 |
| 130.04094 | 291.49 | 23.26 | 21.97 | 22.11 | 21.96 | 3.49E-23 | 4.15E-14 | 4.35E-14 | 4.42E-14 | 7.14E-01 | 1.00E+00 | 6.82E-01 |
| 130.0508  | 288.7  | 18.86 | 18.46 | 18.54 | 19.01 | 1.34E-03 | 3.87E-02 | 1.33E-01 | 7.85E-01 | 9.54E-01 | 3.62E-03 | 1.68E-02 |
| 130.06041 | 240.64 | 20.77 | 20.14 | 20.13 | 20.22 | 1.76E-01 | 2.44E-01 | 2.21E-01 | 3.88E-01 | 1.00E+00 | 9.96E-01 | 9.94E-01 |
| 130.06604 | 180.4  | 15.15 | 14.78 | 14.86 | 14.70 | 8.46E-02 | 1.81E-01 | 3.77E-01 | 8.03E-02 | 9.74E-01 | 9.76E-01 | 8.40E-01 |
| 130.08722 | 220.28 | 23.52 | 22.86 | 22.80 | 22.31 | 3.04E-05 | 2.89E-02 | 1.22E-02 | 7.64E-06 | 9.94E-01 | 1.27E-01 | 2.05E-01 |
| 130.0874  | 27.32  | 23.47 | 22.44 | 22.47 | 22.41 | 1.83E-21 | 4.26E-14 | 4.31E-14 | 4.15E-14 | 9.91E-01 | 9.98E-01 | 9.63E-01 |
| 130.95756 | 45.93  | 23.58 | 23.57 | 24.35 | 24.08 | 2.35E-31 | 1.00E+00 | 6.66E-15 | 2.75E-12 | 8.66E-15 | 6.58E-12 | 5.74E-04 |

|           |        |       |       |       |       |          |          |          |          |          |          |          |
|-----------|--------|-------|-------|-------|-------|----------|----------|----------|----------|----------|----------|----------|
| 130.96364 | 48.19  | 20.04 | 19.84 | 20.80 | 20.57 | 7.40E-44 | 4.75E-03 | 5.11E-15 | 4.24E-14 | 5.11E-15 | 7.55E-15 | 1.39E-03 |
| 130.99922 | 20.82  | 15.87 | 16.01 | 15.92 | 15.80 | 6.06E-01 | 7.75E-01 | 9.81E-01 | 9.76E-01 | 9.42E-01 | 5.60E-01 | 8.69E-01 |
| 131.00972 | 289.51 | 14.79 | 16.16 | 16.50 | 16.34 | 1.56E-06 | 4.35E-04 | 4.60E-06 | 8.29E-05 | 7.58E-01 | 9.60E-01 | 9.67E-01 |
| 131.02384 | 20.98  | 15.78 | 16.47 | 16.56 | 16.68 | 4.44E-10 | 4.73E-06 | 1.80E-07 | 4.29E-09 | 9.33E-01 | 4.68E-01 | 8.15E-01 |
| 131.02499 | 210.13 | 14.14 | 6.96  | 6.97  | 7.10  | 1.48E-62 | 5.11E-15 | 5.11E-15 | 5.11E-15 | 1.00E+00 | 9.82E-01 | 9.86E-01 |
| 131.03514 | 21.12  | 20.39 | 20.55 | 20.42 | 20.68 | 2.02E-03 | 2.22E-01 | 9.90E-01 | 2.54E-03 | 3.89E-01 | 3.57E-01 | 8.45E-03 |
| 131.03568 | 293.44 | 22.79 | 20.93 | 21.05 | 21.18 | 2.09E-15 | 4.77E-13 | 7.77E-12 | 8.76E-10 | 9.53E-01 | 7.29E-01 | 9.51E-01 |
| 131.04431 | 286.59 | 19.23 | 18.48 | 18.71 | 18.09 | 4.21E-33 | 4.17E-14 | 2.61E-10 | 5.11E-15 | 1.64E-02 | 1.25E-05 | 1.28E-12 |
| 131.04542 | 25.33  | 21.60 | 21.14 | 21.21 | 21.23 | 2.03E-08 | 8.95E-08 | 4.59E-06 | 3.15E-05 | 8.43E-01 | 7.28E-01 | 9.95E-01 |
| 131.05415 | 157.52 | 16.63 | 15.86 | 16.06 | 16.24 | 1.57E-04 | 8.01E-05 | 5.80E-03 | 1.24E-01 | 6.66E-01 | 1.67E-01 | 7.64E-01 |
| 131.06135 | 285.63 | 17.11 | 16.05 | 15.84 | 16.15 | 1.58E-13 | 2.36E-09 | 8.78E-13 | 1.58E-07 | 6.03E-01 | 9.32E-01 | 2.70E-01 |
| 131.06566 | 24.67  | 15.94 | 15.28 | 15.28 | 15.55 | 5.02E-04 | 1.52E-03 | 1.17E-03 | 1.31E-01 | 1.00E+00 | 5.09E-01 | 4.80E-01 |
| 131.07116 | 282.22 | 20.88 | 18.99 | 18.97 | 19.69 | 8.11E-22 | 4.32E-14 | 4.26E-14 | 4.68E-08 | 1.00E+00 | 3.83E-03 | 2.59E-03 |
| 131.0826  | 36.12  | 18.71 | 18.57 | 18.42 | 18.76 | 4.21E-01 | 9.24E-01 | 5.24E-01 | 9.95E-01 | 8.93E-01 | 8.44E-01 | 4.27E-01 |
| 131.09055 | 234.15 | 17.88 | 17.64 | 17.27 | 17.17 | 7.48E-05 | 4.54E-01 | 1.25E-03 | 2.14E-04 | 1.26E-01 | 3.73E-02 | 9.39E-01 |
| 131.96088 | 56.63  | 17.02 | 16.94 | 17.77 | 17.52 | 1.50E-36 | 5.12E-01 | 5.11E-15 | 1.87E-13 | 5.11E-15 | 4.37E-14 | 3.47E-04 |
| 131.98321 | 26.5   | 16.31 | 15.26 | 15.81 | 15.29 | 1.63E-06 | 8.32E-06 | 8.30E-02 | 2.86E-05 | 5.57E-02 | 9.99E-01 | 9.22E-02 |
| 132.01255 | 24.24  | 15.29 | 12.87 | 13.97 | 15.36 | 4.37E-05 | 1.88E-04 | 9.18E-02 | 9.99E-01 | 2.37E-01 | 2.81E-04 | 9.21E-02 |
| 132.02012 | 289.26 | 18.79 | 17.68 | 17.71 | 17.44 | 9.70E-36 | 7.77E-15 | 9.77E-15 | 5.11E-15 | 9.96E-01 | 6.01E-02 | 3.27E-02 |
| 132.02032 | 19.65  | 15.75 | 13.88 | 13.95 | 14.28 | 1.52E-45 | 5.11E-15 | 5.11E-15 | 5.33E-15 | 9.44E-01 | 6.12E-03 | 2.94E-02 |
| 132.03026 | 18.67  | 25.40 | 25.80 | 25.96 | 25.70 | 2.21E-06 | 8.39E-04 | 7.37E-07 | 2.66E-02 | 4.27E-01 | 7.95E-01 | 7.81E-02 |
| 132.03898 | 198.29 | 16.69 | 13.63 | 12.12 | 12.62 | 6.31E-20 | 1.98E-09 | 4.24E-14 | 6.05E-14 | 9.63E-03 | 1.75E-01 | 7.37E-01 |
| 132.03942 | 291.98 | 18.26 | 14.50 | 15.12 | 14.64 | 6.07E-36 | 5.11E-15 | 1.29E-14 | 5.11E-15 | 1.15E-01 | 9.60E-01 | 3.32E-01 |
| 132.05658 | 283.36 | 22.69 | 21.15 | 21.42 | 21.56 | 1.04E-30 | 5.11E-15 | 2.91E-14 | 4.42E-14 | 1.01E-01 | 5.59E-03 | 6.82E-01 |
| 132.06644 | 188.74 | 16.12 | 15.11 | 15.26 | 15.54 | 4.29E-12 | 1.65E-11 | 5.54E-09 | 2.85E-04 | 7.23E-01 | 1.62E-02 | 1.92E-01 |
| 132.0746  | 187.48 | 16.18 | 15.46 | 15.24 | 16.13 | 9.20E-15 | 2.32E-07 | 7.04E-12 | 9.82E-01 | 3.04E-01 | 5.79E-06 | 6.44E-10 |
| 132.08591 | 73.87  | 13.54 | 13.51 | 13.89 | 14.66 | 1.86E-03 | 1.00E+00 | 6.62E-01 | 3.12E-03 | 6.24E-01 | 3.18E-03 | 9.00E-02 |
| 132.86769 | 195.45 | 17.98 | 17.64 | 17.82 | 17.53 | 5.22E-02 | 1.81E-01 | 7.60E-01 | 4.72E-02 | 7.29E-01 | 9.26E-01 | 3.63E-01 |
| 132.90008 | 136.49 | 15.71 | 14.02 | 14.12 | 14.37 | 1.53E-21 | 4.20E-14 | 4.42E-14 | 3.48E-12 | 9.30E-01 | 2.10E-01 | 5.17E-01 |
| 132.94646 | 22.64  | 20.12 | 21.17 | 21.09 | 21.12 | 2.29E-33 | 5.11E-15 | 7.99E-15 | 8.66E-15 | 7.59E-01 | 9.37E-01 | 9.82E-01 |
| 132.96173 | 57.51  | 15.31 | 14.75 | 15.67 | 15.60 | 1.76E-16 | 8.53E-07 | 2.09E-03 | 3.29E-02 | 4.44E-14 | 1.30E-12 | 8.85E-01 |
| 133.01419 | 19.15  | 26.08 | 27.05 | 27.07 | 27.05 | 3.95E-28 | 3.13E-14 | 2.31E-14 | 3.93E-14 | 9.98E-01 | 1.00E+00 | 9.98E-01 |
| 133.03337 | 22.31  | 20.41 | 20.77 | 20.81 | 20.57 | 5.82E-04 | 4.39E-03 | 1.02E-03 | 4.55E-01 | 9.83E-01 | 2.80E-01 | 1.36E-01 |
| 133.04054 | 281.55 | 19.11 | 17.74 | 17.86 | 18.01 | 2.13E-27 | 1.15E-14 | 3.35E-14 | 4.37E-14 | 7.59E-01 | 1.32E-01 | 6.02E-01 |
| 133.05183 | 282.04 | 23.04 | 21.67 | 21.81 | 21.55 | 3.07E-27 | 3.55E-14 | 4.20E-14 | 1.89E-14 | 7.33E-01 | 7.95E-01 | 2.19E-01 |
| 133.05993 | 257.88 | 19.01 | 16.82 | 16.95 | 16.96 | 1.03E-49 | 5.11E-15 | 5.11E-15 | 5.11E-15 | 7.28E-01 | 7.18E-01 | 1.00E+00 |
| 133.07706 | 211.61 | 15.34 | 11.61 | 11.20 | 12.03 | 3.96E-56 | 5.11E-15 | 5.11E-15 | 5.11E-15 | 2.22E-01 | 2.10E-01 | 9.16E-04 |
| 133.98032 | 32.75  | 13.74 | 13.65 | 13.90 | 13.49 | 7.38E-01 | 9.94E-01 | 9.67E-01 | 9.06E-01 | 8.97E-01 | 9.75E-01 | 6.88E-01 |
| 133.99946 | 292.19 | 15.45 | 16.23 | 16.46 | 14.62 | 3.31E-05 | 1.83E-01 | 4.32E-02 | 1.59E-01 | 9.37E-01 | 5.98E-04 | 5.08E-05 |
| 133.99959 | 210.56 | 13.59 | 6.95  | 7.04  | 7.24  | 6.60E-30 | 1.27E-14 | 1.38E-14 | 3.31E-14 | 9.99E-01 | 9.63E-01 | 9.88E-01 |
| 134.02466 | 185.67 | 15.53 | 14.63 | 14.51 | 15.33 | 3.66E-12 | 6.88E-08 | 5.18E-10 | 5.69E-01 | 8.50E-01 | 1.14E-04 | 2.82E-06 |
| 134.03566 | 25.81  | 19.73 | 18.93 | 18.87 | 18.64 | 4.15E-10 | 6.74E-06 | 8.18E-07 | 1.21E-09 | 9.81E-01 | 3.04E-01 | 5.09E-01 |
| 134.03583 | 290.45 | 22.64 | 21.61 | 21.62 | 21.51 | 2.22E-20 | 5.15E-14 | 5.02E-14 | 4.36E-14 | 1.00E+00 | 8.29E-01 | 7.92E-01 |
| 134.04712 | 243.12 | 20.08 | 21.19 | 21.17 | 20.96 | 1.88E-11 | 1.07E-09 | 1.45E-09 | 3.36E-06 | 9.99E-01 | 5.45E-01 | 6.07E-01 |
| 134.05512 | 290.22 | 17.97 | 16.44 | 16.39 | 16.50 | 2.51E-28 | 2.69E-14 | 1.60E-14 | 4.13E-14 | 9.91E-01 | 9.76E-01 | 8.94E-01 |

|           |        |       |       |       |       |          |          |          |          |          |          |          |
|-----------|--------|-------|-------|-------|-------|----------|----------|----------|----------|----------|----------|----------|
| 134.05959 | 289.52 | 20.13 | 18.44 | 18.77 | 18.42 | 3.15E-50 | 5.11E-15 | 5.11E-15 | 5.11E-15 | 4.59E-03 | 9.99E-01 | 3.86E-03 |
| 134.06096 | 20.68  | 14.29 | 17.25 | 12.17 | 13.17 | 1.39E-78 | 5.11E-15 | 5.33E-15 | 3.60E-09 | 5.11E-15 | 5.11E-15 | 2.83E-07 |
| 134.07224 | 258.23 | 20.55 | 18.15 | 18.36 | 18.25 | 5.82E-85 | 5.11E-15 | 5.11E-15 | 5.11E-15 | 8.12E-02 | 7.01E-01 | 5.99E-01 |
| 134.07355 | 20.03  | 16.86 | 18.20 | 17.16 | 17.18 | 3.13E-12 | 2.17E-12 | 3.03E-01 | 2.70E-01 | 8.47E-08 | 4.33E-07 | 9.99E-01 |
| 134.8654  | 185.77 | 16.57 | 15.98 | 15.65 | 15.56 | 1.13E-04 | 6.35E-02 | 6.54E-04 | 2.49E-04 | 5.19E-01 | 3.28E-01 | 9.82E-01 |
| 134.89452 | 169.33 | 20.43 | 19.15 | 19.20 | 19.51 | 6.47E-07 | 3.64E-06 | 7.89E-06 | 2.08E-03 | 9.97E-01 | 5.31E-01 | 6.52E-01 |
| 134.8946  | 243.68 | 17.46 | 17.49 | 17.93 | 18.39 | 8.41E-03 | 9.99E-01 | 3.66E-01 | 1.11E-02 | 4.69E-01 | 2.08E-02 | 4.30E-01 |
| 134.94337 | 16.91  | 18.50 | 19.47 | 19.45 | 19.47 | 3.35E-29 | 1.87E-14 | 2.24E-14 | 2.84E-14 | 9.96E-01 | 1.00E+00 | 9.99E-01 |
| 134.97296 | 173.12 | 16.11 | 15.90 | 15.83 | 16.30 | 2.12E-05 | 1.42E-01 | 2.07E-02 | 2.18E-01 | 8.88E-01 | 6.99E-04 | 3.37E-05 |
| 135.0189  | 21.67  | 19.22 | 19.91 | 20.07 | 19.97 | 4.05E-20 | 1.00E-12 | 4.33E-14 | 1.23E-13 | 2.79E-01 | 9.36E-01 | 6.53E-01 |
| 135.01976 | 289.85 | 17.95 | 14.43 | 14.47 | 14.70 | 4.77E-35 | 5.11E-15 | 5.11E-15 | 1.04E-14 | 9.99E-01 | 7.84E-01 | 8.50E-01 |
| 135.03057 | 22.25  | 25.05 | 24.78 | 24.90 | 25.18 | 1.18E-02 | 1.13E-01 | 6.01E-01 | 7.12E-01 | 7.50E-01 | 9.47E-03 | 1.21E-01 |
| 135.03917 | 291.5  | 17.25 | 16.15 | 16.25 | 16.19 | 1.21E-12 | 2.09E-10 | 5.17E-09 | 2.24E-09 | 9.28E-01 | 9.96E-01 | 9.83E-01 |
| 135.03928 | 80.14  | 16.27 | 14.70 | 14.89 | 15.09 | 4.67E-25 | 2.04E-14 | 4.51E-14 | 1.34E-13 | 5.43E-01 | 4.38E-02 | 5.25E-01 |
| 135.04497 | 267.55 | 20.22 | 19.77 | 19.80 | 19.85 | 6.46E-04 | 1.50E-03 | 3.13E-03 | 1.67E-02 | 9.95E-01 | 9.28E-01 | 9.80E-01 |
| 135.04961 | 151.71 | 15.04 | 15.34 | 15.83 | 15.66 | 3.76E-01 | 9.21E-01 | 3.48E-01 | 5.91E-01 | 7.54E-01 | 9.25E-01 | 9.87E-01 |
| 135.05622 | 275.05 | 18.08 | 16.96 | 17.08 | 16.85 | 1.78E-25 | 4.24E-14 | 4.29E-14 | 3.15E-14 | 7.09E-01 | 8.17E-01 | 2.21E-01 |
| 135.06748 | 257.83 | 19.40 | 17.10 | 17.33 | 17.04 | 7.95E-55 | 5.11E-15 | 5.11E-15 | 5.11E-15 | 2.66E-01 | 9.76E-01 | 1.28E-01 |
| 135.08147 | 108.52 | 14.80 | 13.74 | 13.94 | 13.97 | 8.38E-04 | 8.88E-04 | 1.07E-02 | 1.95E-02 | 8.82E-01 | 8.55E-01 | 1.00E+00 |
| 135.89465 | 131.23 | 17.10 | 15.04 | 15.34 | 15.71 | 6.78E-26 | 1.04E-14 | 4.11E-14 | 3.25E-12 | 3.28E-01 | 1.83E-03 | 1.81E-01 |
| 135.94494 | 291.24 | 15.81 | 16.56 | 16.48 | 16.28 | 9.93E-03 | 1.07E-02 | 2.91E-02 | 2.24E-01 | 9.84E-01 | 6.90E-01 | 8.71E-01 |
| 135.97087 | 96.83  | 15.39 | 14.31 | 14.31 | 14.62 | 5.26E-17 | 7.34E-14 | 5.93E-14 | 1.16E-07 | 1.00E+00 | 9.99E-02 | 8.90E-02 |
| 136.00733 | 19.12  | 12.54 | 14.34 | 13.71 | 15.11 | 1.33E-04 | 7.68E-03 | 1.49E-01 | 6.54E-05 | 6.86E-01 | 5.57E-01 | 7.97E-02 |
| 136.01504 | 290.3  | 17.41 | 17.40 | 17.53 | 17.08 | 6.65E-03 | 1.00E+00 | 7.91E-01 | 4.53E-02 | 7.50E-01 | 6.97E-02 | 3.69E-03 |
| 136.01518 | 94.72  | 16.31 | 14.53 | 14.72 | 15.20 | 2.43E-42 | 5.11E-15 | 5.11E-15 | 4.33E-14 | 3.31E-01 | 9.99E-08 | 1.76E-04 |
| 136.02827 | 25.17  | 17.59 | 15.80 | 15.84 | 16.60 | 9.05E-23 | 4.13E-14 | 4.30E-14 | 6.56E-07 | 9.96E-01 | 1.40E-04 | 2.95E-04 |
| 136.03407 | 21.36  | 20.44 | 19.88 | 20.05 | 20.37 | 7.18E-06 | 2.62E-05 | 5.29E-03 | 9.46E-01 | 5.23E-01 | 6.64E-04 | 4.52E-02 |
| 136.04027 | 258.63 | 17.64 | 17.29 | 17.31 | 17.68 | 1.96E-04 | 7.87E-03 | 1.26E-02 | 9.81E-01 | 9.98E-01 | 3.97E-03 | 6.38E-03 |
| 136.04836 | 216.81 | 17.46 | 17.72 | 17.60 | 17.56 | 3.02E-01 | 2.22E-01 | 7.40E-01 | 8.87E-01 | 8.08E-01 | 6.81E-01 | 9.94E-01 |
| 136.05163 | 218.89 | 22.30 | 19.36 | 19.50 | 19.42 | 2.73E-45 | 5.11E-15 | 5.11E-15 | 5.11E-15 | 8.83E-01 | 9.88E-01 | 9.80E-01 |
| 136.05178 | 26.99  | 22.65 | 22.40 | 22.31 | 22.05 | 1.00E-03 | 3.01E-01 | 7.99E-02 | 3.18E-04 | 9.27E-01 | 9.14E-02 | 2.94E-01 |
| 136.05963 | 208.74 | 15.09 | 9.06  | 9.07  | 9.59  | 6.99E-20 | 4.39E-14 | 4.31E-14 | 4.98E-13 | 1.00E+00 | 8.78E-01 | 8.82E-01 |
| 136.07092 | 211.29 | 14.02 | 9.16  | 9.39  | 8.69  | 3.50E-17 | 1.02E-12 | 6.40E-12 | 7.39E-14 | 9.83E-01 | 8.86E-01 | 6.94E-01 |
| 136.0713  | 21.85  | 15.03 | 16.06 | 14.92 | 15.56 | 4.50E-05 | 4.07E-04 | 9.75E-01 | 1.73E-01 | 1.09E-04 | 2.54E-01 | 7.87E-02 |
| 136.86297 | 188.75 | 15.35 | 15.39 | 15.07 | 15.15 | 4.32E-01 | 9.98E-01 | 5.76E-01 | 8.11E-01 | 4.96E-01 | 7.36E-01 | 9.86E-01 |
| 136.86315 | 17.95  | 16.85 | 16.57 | 16.41 | 16.78 | 9.68E-02 | 4.63E-01 | 9.28E-02 | 9.83E-01 | 8.36E-01 | 7.34E-01 | 2.52E-01 |
| 136.89154 | 136.83 | 19.28 | 17.20 | 17.77 | 17.64 | 4.47E-23 | 2.60E-14 | 2.27E-13 | 6.54E-14 | 1.76E-02 | 1.12E-01 | 9.26E-01 |
| 136.91768 | 25.02  | 16.44 | 16.02 | 16.02 | 16.54 | 9.99E-07 | 1.24E-03 | 1.32E-03 | 8.00E-01 | 1.00E+00 | 8.06E-05 | 8.48E-05 |
| 136.92265 | 94.31  | 15.50 | 14.93 | 15.11 | 15.27 | 2.98E-07 | 1.11E-07 | 4.67E-04 | 9.74E-02 | 2.65E-01 | 6.52E-03 | 4.20E-01 |
| 136.96431 | 290.95 | 16.59 | 18.95 | 18.99 | 18.49 | 1.91E-34 | 5.11E-15 | 5.11E-15 | 4.26E-14 | 9.98E-01 | 7.64E-02 | 4.54E-02 |
| 136.96452 | 18.97  | 16.65 | 20.80 | 20.69 | 19.81 | 5.56E-43 | 5.11E-15 | 5.11E-15 | 1.09E-14 | 9.78E-01 | 2.57E-03 | 8.56E-03 |
| 137.01033 | 293.15 | 12.80 | 16.46 | 16.40 | 15.13 | 1.01E-18 | 4.27E-14 | 4.26E-14 | 3.54E-07 | 9.99E-01 | 1.20E-02 | 1.63E-02 |
| 137.02424 | 292.43 | 21.08 | 22.14 | 21.64 | 20.81 | 2.69E-12 | 1.86E-08 | 6.43E-03 | 3.98E-01 | 2.36E-02 | 1.89E-11 | 3.33E-05 |
| 137.03546 | 288.17 | 18.97 | 18.96 | 19.15 | 18.38 | 2.40E-05 | 1.00E+00 | 6.47E-01 | 9.74E-04 | 6.01E-01 | 2.08E-03 | 1.32E-05 |
| 137.0436  | 137.18 | 15.02 | 13.62 | 14.19 | 14.48 | 4.02E-13 | 1.02E-13 | 7.25E-06 | 1.15E-02 | 6.04E-03 | 1.29E-05 | 3.36E-01 |

|           |        |       |       |       |       |          |          |          |          |          |          |          |
|-----------|--------|-------|-------|-------|-------|----------|----------|----------|----------|----------|----------|----------|
| 137.04668 | 290.89 | 17.93 | 16.61 | 16.96 | 16.73 | 6.43E-22 | 4.14E-14 | 3.89E-12 | 4.27E-14 | 4.32E-02 | 8.40E-01 | 3.05E-01 |
| 137.04681 | 80.55  | 16.88 | 14.62 | 14.70 | 15.25 | 1.57E-39 | 5.11E-15 | 5.11E-15 | 4.06E-14 | 9.51E-01 | 5.59E-04 | 3.30E-03 |
| 137.0549  | 90.26  | 16.12 | 14.05 | 14.08 | 14.53 | 4.28E-42 | 5.11E-15 | 5.11E-15 | 1.35E-14 | 9.93E-01 | 4.64E-03 | 1.02E-02 |
| 137.06059 | 180.97 | 16.25 | 15.54 | 15.80 | 15.84 | 4.94E-06 | 1.17E-06 | 3.86E-03 | 1.39E-02 | 2.19E-01 | 1.45E-01 | 9.93E-01 |
| 137.07196 | 246.28 | 17.46 | 16.25 | 16.29 | 15.42 | 1.19E-16 | 1.17E-07 | 2.27E-07 | 4.22E-14 | 9.98E-01 | 1.09E-03 | 4.98E-04 |
| 137.09705 | 136.12 | 15.07 | 13.58 | 13.53 | 13.88 | 1.34E-22 | 4.29E-14 | 4.19E-14 | 4.46E-12 | 9.90E-01 | 2.42E-01 | 1.29E-01 |
| 137.98645 | 291.09 | 16.80 | 16.48 | 16.34 | 16.85 | 1.58E-04 | 5.56E-02 | 1.79E-03 | 9.83E-01 | 7.17E-01 | 3.05E-02 | 9.69E-04 |
| 138.01949 | 292.54 | 17.29 | 17.05 | 16.98 | 17.34 | 1.57E-03 | 9.18E-02 | 1.53E-02 | 9.74E-01 | 9.23E-01 | 4.45E-02 | 6.83E-03 |
| 138.02758 | 291.35 | 16.32 | 16.51 | 16.49 | 15.03 | 1.51E-07 | 8.75E-01 | 9.10E-01 | 2.14E-05 | 1.00E+00 | 1.39E-06 | 1.73E-06 |
| 138.0276  | 180.8  | 16.27 | 15.59 | 15.56 | 15.87 | 2.21E-07 | 4.34E-06 | 1.02E-06 | 1.88E-02 | 9.95E-01 | 2.01E-01 | 1.19E-01 |
| 138.03068 | 292.58 | 18.88 | 18.01 | 18.22 | 17.90 | 2.16E-15 | 7.17E-12 | 2.14E-07 | 1.22E-13 | 2.55E-01 | 8.07E-01 | 3.68E-02 |
| 138.03889 | 107.78 | 15.46 | 13.80 | 13.55 | 14.00 | 4.03E-24 | 4.33E-14 | 2.62E-14 | 1.98E-13 | 5.14E-01 | 6.77E-01 | 6.68E-02 |
| 138.0559  | 276.74 | 17.25 | 16.89 | 16.75 | 17.53 | 3.45E-05 | 1.26E-01 | 1.21E-02 | 3.65E-01 | 8.35E-01 | 1.72E-03 | 5.89E-05 |
| 138.0671  | 288.56 | 19.93 | 18.23 | 18.57 | 18.40 | 2.77E-46 | 5.11E-15 | 5.11E-15 | 5.11E-15 | 4.94E-03 | 3.41E-01 | 3.82E-01 |
| 138.06722 | 27.28  | 17.41 | 16.58 | 16.05 | 16.39 | 4.89E-20 | 7.92E-09 | 4.09E-14 | 4.77E-12 | 6.57E-04 | 5.01E-01 | 7.59E-02 |
| 138.12878 | 64.41  | 14.82 | 15.90 | 13.54 | 13.95 | 7.32E-86 | 5.11E-15 | 5.11E-15 | 1.35E-14 | 5.11E-15 | 5.11E-15 | 1.30E-06 |
| 138.91476 | 27.45  | 14.04 | 14.71 | 14.86 | 15.13 | 2.60E-02 | 2.51E-01 | 1.06E-01 | 1.96E-02 | 9.79E-01 | 6.96E-01 | 8.92E-01 |
| 138.97048 | 291.04 | 16.60 | 16.77 | 16.79 | 16.91 | 3.33E-01 | 7.13E-01 | 6.50E-01 | 2.62E-01 | 1.00E+00 | 8.66E-01 | 8.99E-01 |
| 138.98007 | 129.12 | 15.60 | 16.19 | 16.34 | 17.27 | 3.94E-16 | 3.91E-03 | 1.15E-04 | 4.53E-14 | 8.20E-01 | 4.75E-08 | 2.65E-06 |
| 138.98018 | 27     | 17.34 | 18.08 | 18.16 | 18.23 | 1.63E-11 | 2.39E-07 | 5.37E-09 | 1.05E-09 | 9.19E-01 | 6.78E-01 | 9.58E-01 |
| 139.00349 | 290.18 | 16.13 | 16.74 | 16.55 | 16.79 | 4.22E-04 | 1.70E-03 | 5.25E-02 | 9.22E-04 | 6.87E-01 | 9.94E-01 | 5.43E-01 |
| 139.00358 | 134.46 | 16.91 | 17.02 | 17.25 | 17.30 | 1.20E-01 | 9.24E-01 | 2.37E-01 | 1.57E-01 | 6.15E-01 | 4.71E-01 | 9.93E-01 |
| 139.01471 | 291.28 | 16.29 | 16.81 | 16.58 | 16.73 | 3.09E-03 | 2.55E-03 | 1.84E-01 | 2.09E-02 | 4.22E-01 | 9.47E-01 | 7.84E-01 |
| 139.01485 | 200.74 | 16.03 | 14.47 | 13.20 | 14.45 | 1.75E-08 | 2.29E-03 | 1.87E-09 | 2.54E-03 | 2.22E-02 | 1.00E+00 | 3.23E-02 |
| 139.01499 | 63.79  | 17.71 | 17.16 | 14.19 | 15.22 | 6.15E-48 | 3.19E-02 | 5.11E-15 | 7.33E-15 | 5.11E-15 | 4.35E-14 | 1.10E-05 |
| 139.02621 | 19.48  | 12.33 | 7.23  | 7.13  | 7.99  | 3.32E-19 | 4.50E-14 | 4.29E-14 | 2.67E-11 | 9.98E-01 | 6.01E-01 | 4.81E-01 |
| 139.03993 | 292.07 | 17.02 | 16.87 | 16.79 | 17.11 | 1.24E-02 | 3.85E-01 | 9.50E-02 | 8.56E-01 | 8.97E-01 | 1.05E-01 | 1.65E-02 |
| 139.05113 | 278.13 | 18.02 | 17.23 | 17.40 | 17.39 | 3.83E-11 | 1.21E-10 | 3.68E-07 | 7.33E-07 | 4.47E-01 | 5.11E-01 | 1.00E+00 |
| 139.0625  | 88.6   | 15.42 | 13.81 | 14.02 | 14.40 | 1.30E-23 | 2.69E-14 | 4.36E-14 | 5.38E-10 | 4.67E-01 | 1.01E-03 | 7.46E-02 |
| 139.07061 | 213.45 | 15.89 | 10.25 | 10.45 | 9.51  | 2.74E-19 | 1.09E-13 | 3.06E-13 | 4.31E-14 | 9.91E-01 | 7.33E-01 | 5.48E-01 |
| 139.07635 | 178.19 | 16.61 | 16.38 | 16.41 | 16.59 | 1.86E-01 | 2.90E-01 | 4.15E-01 | 1.00E+00 | 9.95E-01 | 3.95E-01 | 5.30E-01 |
| 139.11271 | 178.61 | 16.39 | 15.71 | 15.56 | 15.93 | 4.33E-10 | 4.87E-07 | 5.36E-10 | 1.66E-03 | 6.42E-01 | 3.35E-01 | 2.49E-02 |
| 139.98463 | 23.99  | 17.30 | 16.45 | 16.82 | 17.05 | 1.30E-07 | 3.97E-08 | 4.65E-03 | 3.31E-01 | 4.49E-02 | 3.69E-04 | 4.12E-01 |
| 139.99875 | 291.82 | 15.18 | 16.37 | 16.36 | 16.91 | 2.03E-10 | 7.16E-06 | 7.32E-06 | 1.45E-10 | 1.00E+00 | 1.52E-01 | 1.32E-01 |
| 139.99882 | 131.72 | 14.46 | 13.77 | 13.71 | 14.57 | 1.64E-09 | 4.80E-05 | 7.62E-06 | 9.03E-01 | 9.84E-01 | 7.01E-06 | 1.09E-06 |
| 140.01186 | 27.52  | 22.45 | 24.24 | 24.36 | 23.78 | 5.83E-52 | 5.11E-15 | 5.11E-15 | 5.33E-15 | 6.47E-01 | 1.61E-04 | 7.64E-07 |
| 140.02528 | 289.88 | 16.80 | 16.08 | 16.43 | 16.67 | 1.93E-01 | 1.63E-01 | 7.06E-01 | 9.85E-01 | 7.53E-01 | 3.64E-01 | 9.07E-01 |
| 140.03515 | 290.96 | 17.18 | 17.13 | 17.05 | 17.24 | 3.17E-01 | 9.62E-01 | 5.51E-01 | 9.37E-01 | 8.52E-01 | 7.32E-01 | 2.64E-01 |
| 140.04635 | 287.63 | 18.04 | 17.45 | 17.66 | 17.44 | 4.66E-08 | 5.14E-07 | 2.67E-03 | 7.60E-07 | 1.96E-01 | 1.00E+00 | 1.92E-01 |
| 140.07162 | 190.6  | 15.90 | 15.14 | 14.83 | 15.72 | 2.36E-11 | 1.25E-05 | 2.18E-10 | 6.72E-01 | 1.94E-01 | 2.93E-03 | 6.47E-07 |
| 140.9071  | 117.42 | 13.37 | 15.05 | 15.14 | 15.04 | 3.65E-31 | 1.51E-14 | 6.00E-15 | 2.51E-14 | 9.23E-01 | 1.00E+00 | 8.96E-01 |
| 140.9805  | 34.53  | 14.97 | 15.49 | 15.83 | 16.06 | 3.11E-16 | 1.08E-04 | 4.55E-11 | 4.51E-14 | 3.40E-02 | 6.11E-05 | 2.37E-01 |
| 140.98596 | 163.84 | 16.39 | 16.38 | 16.23 | 16.27 | 5.68E-01 | 1.00E+00 | 6.26E-01 | 8.36E-01 | 6.80E-01 | 8.69E-01 | 9.89E-01 |
| 140.99399 | 292.42 | 12.30 | 16.32 | 16.30 | 16.13 | 6.83E-33 | 5.77E-15 | 5.77E-15 | 1.51E-14 | 1.00E+00 | 9.45E-01 | 9.58E-01 |
| 141.01674 | 292.21 | 20.98 | 20.75 | 20.69 | 20.92 | 8.73E-02 | 2.84E-01 | 1.05E-01 | 9.72E-01 | 9.66E-01 | 5.86E-01 | 3.10E-01 |

|           |        |       |       |       |       |          |          |          |          |          |          |          |
|-----------|--------|-------|-------|-------|-------|----------|----------|----------|----------|----------|----------|----------|
| 141.01686 | 46.67  | 20.69 | 19.57 | 20.13 | 19.89 | 2.52E-05 | 9.63E-06 | 6.26E-02 | 3.91E-03 | 7.94E-02 | 5.45E-01 | 7.48E-01 |
| 141.01916 | 287.58 | 18.11 | 16.88 | 17.18 | 17.50 | 3.62E-08 | 2.29E-08 | 2.53E-05 | 1.78E-02 | 4.76E-01 | 1.89E-02 | 4.03E-01 |
| 141.03035 | 290.91 | 16.91 | 17.27 | 17.21 | 17.23 | 1.74E-02 | 2.49E-02 | 6.96E-02 | 6.34E-02 | 9.78E-01 | 9.93E-01 | 9.99E-01 |
| 141.0458  | 211.7  | 14.88 | 9.37  | 9.53  | 9.31  | 1.31E-13 | 1.53E-10 | 3.35E-10 | 2.63E-10 | 9.97E-01 | 1.00E+00 | 9.93E-01 |
| 141.0491  | 125.61 | 14.93 | 14.53 | 15.97 | 14.89 | 2.79E-17 | 3.88E-02 | 1.64E-10 | 9.95E-01 | 4.31E-14 | 9.80E-02 | 3.68E-10 |
| 141.05555 | 288.88 | 17.32 | 17.06 | 17.15 | 17.25 | 1.27E-01 | 1.00E-01 | 4.28E-01 | 9.08E-01 | 8.62E-01 | 4.21E-01 | 8.64E-01 |
| 141.06677 | 287.19 | 16.74 | 16.27 | 16.42 | 16.53 | 2.18E-03 | 9.72E-04 | 5.03E-02 | 3.48E-01 | 6.04E-01 | 1.87E-01 | 8.44E-01 |
| 141.06687 | 207.18 | 17.82 | 15.47 | 15.25 | 15.70 | 6.25E-45 | 5.11E-15 | 5.11E-15 | 5.11E-15 | 4.99E-01 | 4.95E-01 | 2.91E-02 |
| 141.09193 | 282.44 | 17.22 | 16.93 | 16.93 | 17.06 | 2.92E-02 | 4.52E-02 | 4.45E-02 | 4.70E-01 | 1.00E+00 | 7.02E-01 | 7.07E-01 |
| 141.90783 | 113.15 | 13.34 | 14.90 | 14.97 | 14.93 | 3.04E-35 | 5.33E-15 | 5.11E-15 | 5.77E-15 | 9.55E-01 | 9.96E-01 | 9.93E-01 |
| 142.01207 | 30.07  | 20.80 | 20.58 | 20.99 | 20.52 | 5.21E-03 | 4.04E-01 | 5.15E-01 | 1.97E-01 | 2.34E-02 | 9.69E-01 | 7.20E-03 |
| 142.01443 | 291.92 | 14.96 | 16.52 | 16.02 | 15.61 | 7.36E-05 | 2.96E-05 | 8.65E-03 | 2.30E-01 | 4.49E-01 | 5.05E-02 | 6.53E-01 |
| 142.01451 | 111.02 | 15.47 | 14.51 | 14.59 | 15.07 | 1.86E-08 | 1.61E-07 | 1.30E-06 | 8.68E-02 | 9.68E-01 | 9.47E-03 | 3.27E-02 |
| 142.01547 | 18.3   | 14.96 | 16.10 | 16.26 | 15.58 | 7.85E-23 | 4.16E-14 | 3.46E-14 | 9.61E-06 | 5.90E-01 | 4.24E-04 | 1.64E-06 |
| 142.02012 | 203.91 | 18.15 | 17.35 | 17.36 | 17.55 | 1.89E-11 | 8.82E-10 | 1.20E-09 | 1.00E-05 | 9.99E-01 | 3.86E-01 | 4.44E-01 |
| 142.0202  | 40.63  | 15.95 | 13.17 | 13.52 | 13.72 | 4.30E-07 | 1.41E-06 | 2.76E-05 | 2.69E-04 | 9.09E-01 | 7.42E-01 | 9.83E-01 |
| 142.02262 | 121.94 | 14.55 | 13.55 | 13.56 | 13.83 | 1.66E-09 | 3.59E-08 | 3.71E-08 | 2.19E-04 | 1.00E+00 | 3.54E-01 | 3.80E-01 |
| 142.02616 | 18.45  | 14.25 | 11.51 | 10.96 | 12.41 | 1.90E-28 | 3.86E-14 | 5.33E-15 | 4.14E-10 | 1.75E-01 | 6.97E-03 | 1.81E-06 |
| 142.0409  | 287.27 | 19.60 | 18.04 | 18.35 | 18.35 | 5.36E-29 | 5.33E-15 | 4.22E-14 | 4.26E-14 | 7.54E-02 | 8.17E-02 | 1.00E+00 |
| 142.05077 | 283.29 | 19.97 | 19.38 | 19.43 | 19.54 | 1.48E-07 | 5.77E-07 | 5.60E-06 | 6.40E-04 | 9.57E-01 | 5.00E-01 | 7.95E-01 |
| 142.0605  | 19.16  | 14.62 | 14.22 | 14.26 | 13.93 | 4.19E-07 | 2.65E-03 | 9.19E-03 | 7.03E-08 | 9.79E-01 | 7.95E-02 | 2.77E-02 |
| 142.06625 | 25.97  | 17.15 | 16.16 | 16.46 | 16.55 | 2.03E-20 | 3.53E-14 | 1.11E-11 | 9.89E-09 | 8.18E-03 | 4.96E-04 | 8.04E-01 |
| 142.06939 | 122.83 | 14.41 | 12.96 | 13.48 | 13.38 | 9.75E-07 | 3.99E-07 | 1.90E-03 | 7.45E-04 | 2.13E-01 | 4.33E-01 | 9.82E-01 |
| 142.08733 | 102.38 | 15.25 | 13.78 | 13.87 | 14.01 | 5.85E-18 | 4.67E-14 | 1.07E-13 | 4.26E-11 | 9.48E-01 | 5.78E-01 | 8.74E-01 |
| 142.90527 | 91.66  | 13.51 | 16.70 | 16.80 | 16.46 | 2.56E-47 | 5.11E-15 | 5.11E-15 | 5.11E-15 | 9.57E-01 | 6.42E-01 | 3.36E-01 |
| 142.94922 | 150.3  | 15.99 | 14.71 | 14.92 | 15.35 | 2.19E-14 | 1.48E-13 | 2.63E-10 | 4.82E-04 | 5.50E-01 | 7.49E-04 | 4.40E-02 |
| 142.97468 | 37.43  | 23.57 | 21.96 | 23.55 | 23.38 | 8.74E-27 | 1.67E-14 | 9.99E-01 | 5.33E-01 | 2.60E-14 | 4.15E-14 | 6.35E-01 |
| 142.97505 | 228.94 | 18.79 | 20.66 | 20.55 | 20.18 | 7.87E-15 | 5.67E-13 | 6.66E-12 | 1.43E-07 | 9.65E-01 | 2.23E-01 | 4.54E-01 |
| 142.99607 | 152.64 | 15.95 | 15.87 | 15.27 | 16.10 | 7.92E-03 | 9.88E-01 | 3.00E-02 | 9.30E-01 | 8.39E-02 | 8.07E-01 | 7.84E-03 |
| 142.99613 | 54.66  | 18.13 | 18.31 | 18.86 | 19.32 | 3.40E-13 | 6.53E-01 | 1.18E-05 | 2.99E-12 | 2.17E-03 | 6.21E-09 | 2.03E-02 |
| 142.99862 | 22.7   | 23.33 | 23.14 | 23.09 | 23.42 | 6.10E-03 | 2.32E-01 | 8.91E-02 | 8.19E-01 | 9.74E-01 | 4.27E-02 | 1.22E-02 |
| 143.0155  | 36.21  | 14.83 | 14.29 | 14.46 | 14.61 | 6.31E-02 | 4.25E-02 | 2.64E-01 | 7.16E-01 | 8.43E-01 | 4.49E-01 | 9.00E-01 |
| 143.02107 | 186.41 | 15.65 | 15.41 | 15.50 | 15.47 | 8.49E-01 | 8.26E-01 | 9.52E-01 | 9.20E-01 | 9.88E-01 | 9.97E-01 | 9.99E-01 |
| 143.03504 | 26.82  | 21.39 | 21.59 | 21.21 | 21.24 | 7.68E-03 | 3.26E-01 | 3.95E-01 | 5.78E-01 | 8.65E-03 | 2.43E-02 | 9.95E-01 |
| 143.03535 | 265.84 | 19.42 | 18.68 | 18.35 | 18.47 | 1.49E-13 | 1.05E-06 | 1.03E-12 | 8.22E-10 | 9.07E-02 | 4.75E-01 | 8.37E-01 |
| 143.04568 | 194.81 | 17.27 | 15.38 | 15.09 | 15.91 | 2.90E-23 | 4.26E-14 | 2.86E-14 | 1.59E-09 | 5.04E-01 | 6.05E-02 | 7.44E-04 |
| 143.04887 | 216.86 | 15.61 | 6.51  | 8.15  | 8.95  | 9.28E-27 | 7.33E-15 | 4.11E-14 | 5.40E-14 | 1.48E-01 | 1.30E-02 | 7.41E-01 |
| 143.05422 | 165.64 | 16.66 | 16.14 | 16.60 | 16.37 | 3.30E-04 | 3.99E-04 | 9.62E-01 | 1.31E-01 | 3.08E-03 | 3.15E-01 | 3.34E-01 |
| 143.06144 | 211.82 | 16.04 | 12.78 | 13.35 | 13.53 | 1.52E-27 | 6.66E-15 | 4.31E-14 | 4.33E-14 | 1.58E-01 | 4.38E-02 | 9.26E-01 |
| 143.0712  | 262.82 | 19.96 | 19.42 | 19.25 | 19.70 | 6.50E-04 | 1.62E-02 | 4.99E-04 | 4.97E-01 | 7.77E-01 | 4.58E-01 | 7.82E-02 |
| 143.1076  | 264.9  | 19.08 | 21.43 | 21.42 | 20.48 | 3.63E-49 | 5.11E-15 | 5.11E-15 | 4.13E-14 | 1.00E+00 | 1.04E-09 | 1.07E-09 |
| 143.97851 | 63.77  | 18.18 | 16.16 | 17.59 | 17.57 | 8.72E-35 | 5.11E-15 | 6.89E-05 | 7.41E-05 | 3.91E-14 | 4.33E-14 | 9.99E-01 |
| 143.99136 | 140.88 | 15.21 | 14.19 | 13.83 | 14.07 | 2.28E-05 | 3.55E-03 | 2.46E-05 | 1.10E-03 | 6.34E-01 | 9.78E-01 | 8.75E-01 |
| 144.00205 | 25.27  | 18.59 | 18.28 | 18.31 | 18.68 | 5.69E-04 | 2.70E-02 | 5.54E-02 | 8.34E-01 | 9.92E-01 | 3.26E-03 | 7.48E-03 |
| 144.01234 | 157.64 | 15.72 | 15.40 | 15.45 | 15.76 | 7.55E-02 | 1.98E-01 | 3.51E-01 | 9.96E-01 | 9.87E-01 | 1.57E-01 | 2.83E-01 |



|           |        |       |       |       |       |           |          |          |          |          |          |          |
|-----------|--------|-------|-------|-------|-------|-----------|----------|----------|----------|----------|----------|----------|
| 144.02015 | 291.78 | 17.45 | 16.47 | 16.42 | 16.53 | 4.68E-15  | 1.72E-11 | 1.30E-12 | 5.98E-10 | 9.86E-01 | 9.78E-01 | 8.79E-01 |
| 144.03027 | 290.87 | 16.60 | 16.83 | 16.61 | 17.15 | 1.50E-03  | 3.97E-01 | 1.00E+00 | 2.25E-03 | 4.57E-01 | 1.88E-01 | 3.62E-03 |
| 144.03037 | 20.39  | 16.53 | 16.87 | 16.69 | 16.58 | 1.06E-04  | 7.25E-05 | 1.46E-01 | 9.08E-01 | 9.81E-02 | 2.32E-03 | 5.25E-01 |
| 144.04023 | 290.5  | 16.38 | 16.20 | 16.26 | 16.63 | 1.71E-01  | 7.79E-01 | 9.22E-01 | 5.97E-01 | 9.89E-01 | 1.53E-01 | 2.66E-01 |
| 144.04025 | 189.02 | 17.77 | 16.80 | 16.72 | 17.11 | 2.37E-10  | 3.62E-08 | 1.43E-09 | 4.50E-04 | 9.55E-01 | 2.66E-01 | 9.22E-02 |
| 144.0454  | 241.16 | 19.57 | 19.60 | 19.37 | 19.85 | 2.32E-01  | 9.98E-01 | 8.08E-01 | 5.81E-01 | 7.30E-01 | 7.02E-01 | 1.58E-01 |
| 144.05659 | 264.57 | 21.46 | 19.22 | 19.44 | 19.70 | 1.68E-41  | 5.11E-15 | 5.11E-15 | 7.33E-15 | 4.51E-01 | 9.96E-03 | 3.09E-01 |
| 144.06642 | 282.84 | 18.81 | 18.08 | 17.94 | 18.31 | 8.36E-06  | 2.97E-04 | 8.02E-06 | 3.17E-02 | 8.66E-01 | 6.06E-01 | 1.91E-01 |
| 144.07457 | 182.82 | 17.33 | 16.78 | 16.82 | 17.43 | 2.64E-10  | 5.46E-06 | 2.02E-05 | 8.10E-01 | 9.88E-01 | 2.87E-07 | 1.09E-06 |
| 144.10291 | 190.48 | 17.59 | 20.19 | 20.02 | 19.20 | 3.30E-44  | 5.11E-15 | 5.11E-15 | 4.13E-14 | 7.20E-01 | 5.17E-08 | 6.54E-06 |
| 144.11094 | 217.01 | 16.12 | 16.48 | 16.53 | 16.25 | 9.49E-03  | 4.16E-02 | 1.43E-02 | 7.79E-01 | 9.87E-01 | 3.81E-01 | 2.13E-01 |
| 144.90443 | 121.16 | 16.04 | 18.47 | 19.35 | 18.41 | 3.90E-47  | 5.11E-15 | 5.11E-15 | 5.11E-15 | 1.75E-05 | 9.90E-01 | 7.36E-06 |
| 144.95442 | 50.23  | 22.40 | 19.83 | 23.07 | 22.87 | 3.74E-115 | 5.11E-15 | 4.36E-14 | 1.52E-08 | 5.11E-15 | 5.11E-15 | 5.56E-02 |
| 144.96746 | 24.35  | 15.07 | 14.23 | 14.42 | 14.58 | 8.88E-04  | 5.88E-04 | 1.09E-02 | 1.12E-01 | 8.32E-01 | 4.04E-01 | 8.79E-01 |
| 144.97557 | 86.85  | 18.00 | 17.18 | 15.28 | 15.93 | 1.33E-18  | 2.63E-02 | 4.32E-14 | 1.59E-10 | 2.97E-09 | 2.71E-04 | 1.37E-01 |
| 144.98193 | 38.55  | 16.10 | 15.00 | 14.99 | 14.99 | 6.26E-06  | 1.19E-04 | 9.09E-05 | 1.61E-04 | 1.00E+00 | 1.00E+00 | 1.00E+00 |
| 144.9909  | 161.67 | 14.87 | 13.97 | 12.93 | 14.03 | 7.82E-06  | 6.89E-02 | 1.18E-06 | 1.12E-01 | 2.81E-02 | 9.99E-01 | 2.28E-02 |
| 145.00293 | 37.37  | 16.68 | 16.91 | 17.25 | 17.38 | 2.31E-17  | 1.38E-02 | 6.58E-12 | 4.40E-14 | 1.20E-04 | 2.06E-07 | 4.26E-01 |
| 145.01442 | 20     | 20.35 | 22.01 | 21.75 | 22.03 | 2.18E-25  | 3.75E-14 | 4.34E-14 | 3.75E-14 | 3.92E-01 | 9.98E-01 | 3.19E-01 |
| 145.01528 | 289.98 | 16.69 | 16.34 | 15.89 | 15.64 | 8.19E-03  | 6.98E-01 | 5.71E-02 | 8.44E-03 | 5.02E-01 | 1.61E-01 | 8.81E-01 |
| 145.02395 | 116.69 | 15.59 | 14.58 | 15.05 | 14.63 | 4.50E-09  | 3.33E-08 | 6.78E-03 | 3.41E-07 | 3.05E-02 | 9.92E-01 | 7.69E-02 |
| 145.02516 | 290.72 | 12.51 | 15.41 | 14.67 | 16.49 | 3.80E-16  | 5.20E-10 | 3.69E-06 | 4.44E-14 | 3.27E-01 | 8.02E-02 | 3.70E-04 |
| 145.02934 | 184.76 | 14.99 | 14.03 | 13.97 | 14.40 | 9.74E-11  | 1.03E-08 | 1.12E-09 | 1.14E-03 | 9.87E-01 | 1.06E-01 | 4.59E-02 |
| 145.03997 | 290.32 | 16.23 | 15.31 | 15.30 | 15.60 | 2.60E-04  | 8.96E-04 | 6.49E-04 | 5.09E-02 | 1.00E+00 | 6.68E-01 | 6.33E-01 |
| 145.0407  | 191.79 | 16.81 | 14.30 | 14.13 | 14.53 | 1.31E-34  | 5.33E-15 | 5.11E-15 | 2.42E-14 | 8.31E-01 | 7.04E-01 | 2.25E-01 |
| 145.05131 | 291.26 | 24.47 | 22.44 | 22.62 | 21.96 | 5.02E-36  | 7.33E-15 | 2.51E-14 | 5.11E-15 | 7.27E-01 | 3.53E-02 | 1.26E-03 |
| 145.0619  | 25.97  | 24.53 | 24.76 | 24.78 | 24.76 | 7.89E-04  | 6.48E-03 | 1.89E-03 | 8.22E-03 | 9.89E-01 | 1.00E+00 | 9.90E-01 |
| 145.06982 | 152.67 | 17.12 | 16.31 | 16.61 | 16.53 | 1.86E-06  | 7.84E-07 | 3.83E-03 | 8.17E-04 | 1.90E-01 | 4.97E-01 | 9.50E-01 |
| 145.07715 | 214.31 | 14.57 | 8.12  | 8.94  | 8.72  | 1.78E-21  | 4.33E-14 | 4.93E-14 | 4.76E-14 | 6.05E-01 | 8.16E-01 | 9.89E-01 |
| 145.08684 | 262.12 | 18.13 | 17.41 | 17.44 | 17.51 | 1.03E-05  | 5.54E-05 | 1.25E-04 | 1.08E-03 | 9.96E-01 | 9.30E-01 | 9.80E-01 |
| 145.09816 | 53.44  | 20.94 | 20.82 | 22.38 | 22.27 | 3.61E-13  | 9.53E-01 | 1.99E-08 | 7.35E-07 | 3.16E-09 | 1.25E-07 | 9.65E-01 |
| 145.10621 | 192.03 | 12.16 | 14.87 | 14.80 | 14.17 | 7.41E-11  | 2.34E-09 | 4.06E-09 | 2.40E-05 | 9.99E-01 | 3.72E-01 | 4.54E-01 |
| 145.94957 | 133.4  | 15.67 | 15.38 | 15.32 | 14.61 | 2.98E-15  | 6.13E-02 | 1.18E-02 | 4.26E-14 | 9.47E-01 | 4.57E-09 | 6.11E-08 |
| 145.95785 | 74.65  | 15.78 | 15.20 | 16.10 | 15.96 | 1.83E-19  | 1.66E-09 | 1.80E-03 | 1.88E-01 | 4.35E-14 | 1.46E-13 | 4.42E-01 |
| 145.97063 | 142.91 | 15.09 | 12.83 | 12.90 | 13.03 | 8.52E-11  | 7.63E-09 | 1.58E-08 | 2.86E-07 | 9.98E-01 | 9.57E-01 | 9.87E-01 |
| 145.99201 | 21.21  | 15.82 | 15.33 | 15.20 | 16.10 | 7.81E-02  | 5.57E-01 | 3.38E-01 | 8.81E-01 | 9.86E-01 | 2.06E-01 | 9.79E-02 |
| 145.99904 | 29.67  | 16.08 | 14.60 | 14.98 | 14.88 | 6.44E-14  | 3.19E-13 | 3.09E-08 | 5.70E-09 | 1.91E-01 | 4.83E-01 | 9.56E-01 |
| 146.01784 | 19.4   | 15.46 | 16.79 | 16.64 | 16.99 | 3.17E-13  | 1.02E-09 | 4.63E-08 | 9.45E-12 | 8.83E-01 | 7.83E-01 | 3.44E-01 |
| 146.02464 | 282.26 | 16.97 | 16.69 | 16.75 | 16.97 | 3.78E-04  | 3.24E-03 | 2.91E-02 | 1.00E+00 | 8.92E-01 | 4.59E-03 | 3.50E-02 |
| 146.02832 | 22.01  | 15.99 | 17.18 | 16.66 | 17.45 | 1.94E-08  | 5.39E-06 | 2.12E-02 | 3.91E-08 | 1.45E-01 | 7.00E-01 | 9.18E-03 |
| 146.0358  | 291.13 | 20.47 | 18.99 | 19.05 | 18.93 | 1.67E-36  | 5.11E-15 | 5.33E-15 | 5.11E-15 | 9.46E-01 | 9.57E-01 | 7.19E-01 |
| 146.03601 | 22.72  | 17.05 | 14.97 | 15.11 | 15.27 | 6.73E-54  | 5.11E-15 | 5.11E-15 | 5.11E-15 | 6.05E-01 | 6.03E-02 | 5.44E-01 |
| 146.04593 | 20.99  | 25.67 | 26.76 | 26.60 | 26.39 | 1.67E-26  | 7.99E-15 | 4.20E-14 | 4.84E-12 | 3.18E-01 | 7.44E-04 | 1.12E-01 |
| 146.05513 | 287.1  | 20.09 | 18.08 | 18.40 | 18.14 | 3.87E-48  | 5.11E-15 | 5.11E-15 | 5.11E-15 | 4.18E-02 | 9.72E-01 | 1.40E-01 |
| 146.05889 | 25.04  | 16.28 | 15.88 | 15.90 | 16.19 | 3.09E-05  | 3.91E-04 | 5.50E-04 | 8.14E-01 | 9.99E-01 | 1.62E-02 | 2.14E-02 |

|           |        |       |       |       |       |          |          |          |          |          |          |          |
|-----------|--------|-------|-------|-------|-------|----------|----------|----------|----------|----------|----------|----------|
| 146.06519 | 23.98  | 20.04 | 20.16 | 20.16 | 20.21 | 1.08E-01 | 2.93E-01 | 3.23E-01 | 9.19E-02 | 1.00E+00 | 9.30E-01 | 9.04E-01 |
| 146.07228 | 262.02 | 21.21 | 18.67 | 18.91 | 18.67 | 7.10E-74 | 5.11E-15 | 5.11E-15 | 5.11E-15 | 1.33E-01 | 1.00E+00 | 1.37E-01 |
| 146.08228 | 24.84  | 21.12 | 20.43 | 20.93 | 21.00 | 1.82E-14 | 6.46E-14 | 8.77E-02 | 4.97E-01 | 4.46E-08 | 1.24E-09 | 8.27E-01 |
| 146.09027 | 139.82 | 15.19 | 13.58 | 13.66 | 14.37 | 4.75E-19 | 4.35E-14 | 4.43E-14 | 4.59E-05 | 9.72E-01 | 1.69E-04 | 7.87E-04 |
| 146.09525 | 62.46  | 21.55 | 21.53 | 23.51 | 23.15 | 3.31E-22 | 1.00E+00 | 4.26E-14 | 5.54E-11 | 4.26E-14 | 1.07E-10 | 3.80E-01 |
| 146.10152 | 73.72  | 15.91 | 16.46 | 17.33 | 17.64 | 1.17E-16 | 2.98E-02 | 3.26E-11 | 5.11E-14 | 1.20E-04 | 1.88E-07 | 4.16E-01 |
| 146.45366 | 271.99 | 15.96 | 14.68 | 15.56 | 15.85 | 3.63E-05 | 3.82E-05 | 4.62E-01 | 9.81E-01 | 1.13E-02 | 4.78E-04 | 7.42E-01 |
| 146.90465 | 108.95 | 13.12 | 15.16 | 15.20 | 14.95 | 6.53E-34 | 5.33E-15 | 5.11E-15 | 2.53E-14 | 9.94E-01 | 6.25E-01 | 4.64E-01 |
| 146.94654 | 33.24  | 15.94 | 16.07 | 16.09 | 16.54 | 9.40E-08 | 5.54E-01 | 3.92E-01 | 4.12E-08 | 9.95E-01 | 3.90E-05 | 9.18E-05 |
| 146.95257 | 60.48  | 18.16 | 17.20 | 18.85 | 18.59 | 1.64E-27 | 1.70E-11 | 8.51E-07 | 6.95E-03 | 5.33E-15 | 4.12E-14 | 2.11E-01 |
| 146.96112 | 125.47 | 18.12 | 18.23 | 18.46 | 16.96 | 3.40E-07 | 9.66E-01 | 5.27E-01 | 9.94E-05 | 8.24E-01 | 2.47E-05 | 3.76E-07 |
| 146.96588 | 169.52 | 16.70 | 14.65 | 14.29 | 14.92 | 2.26E-17 | 2.60E-12 | 4.35E-14 | 2.87E-09 | 5.58E-01 | 7.67E-01 | 1.12E-01 |
| 146.9829  | 198.61 | 16.23 | 17.44 | 17.41 | 18.19 | 1.12E-25 | 1.03E-12 | 1.55E-12 | 5.77E-15 | 9.99E-01 | 3.45E-05 | 1.59E-05 |
| 146.98307 | 24.76  | 20.88 | 20.89 | 21.18 | 20.80 | 2.83E-01 | 1.00E+00 | 4.27E-01 | 9.83E-01 | 4.92E-01 | 9.76E-01 | 2.77E-01 |
| 146.98894 | 83.43  | 13.73 | 13.74 | 13.52 | 14.27 | 3.83E-03 | 1.00E+00 | 7.06E-01 | 3.88E-02 | 6.82E-01 | 5.63E-02 | 1.85E-03 |
| 146.99523 | 20.44  | 16.62 | 15.95 | 15.79 | 15.65 | 1.54E-06 | 1.75E-03 | 4.70E-05 | 4.01E-06 | 8.31E-01 | 4.37E-01 | 9.02E-01 |
| 147.02003 | 205    | 16.45 | 14.82 | 14.54 | 15.32 | 1.66E-21 | 4.44E-14 | 3.85E-14 | 5.14E-08 | 4.53E-01 | 4.68E-02 | 3.68E-04 |
| 147.02092 | 124.03 | 15.88 | 13.89 | 13.70 | 13.93 | 2.37E-18 | 2.95E-13 | 4.35E-14 | 2.53E-12 | 8.70E-01 | 9.99E-01 | 8.02E-01 |
| 147.03055 | 292.28 | 20.10 | 19.05 | 19.20 | 19.40 | 1.22E-13 | 6.72E-13 | 5.35E-10 | 3.54E-06 | 6.52E-01 | 5.96E-02 | 4.96E-01 |
| 147.03934 | 255.7  | 18.60 | 18.72 | 18.75 | 18.18 | 1.39E-04 | 7.88E-01 | 6.38E-01 | 9.72E-03 | 9.95E-01 | 5.95E-04 | 2.09E-04 |
| 147.04483 | 181.01 | 17.32 | 18.19 | 16.68 | 16.94 | 5.73E-18 | 2.70E-07 | 2.47E-04 | 7.31E-02 | 4.43E-14 | 2.14E-12 | 4.01E-01 |
| 147.04926 | 17.44  | 21.39 | 22.38 | 22.14 | 21.93 | 1.53E-25 | 7.33E-15 | 4.22E-14 | 3.10E-09 | 2.93E-02 | 4.21E-06 | 7.42E-02 |
| 147.05626 | 285.19 | 17.07 | 15.92 | 16.13 | 16.20 | 1.53E-11 | 5.78E-11 | 6.04E-08 | 1.50E-06 | 5.83E-01 | 3.56E-01 | 9.75E-01 |
| 147.06632 | 24.54  | 16.00 | 16.58 | 16.66 | 16.88 | 1.00E-03 | 4.70E-02 | 1.53E-02 | 7.05E-04 | 9.84E-01 | 5.47E-01 | 7.59E-01 |
| 147.06745 | 279.74 | 22.45 | 20.52 | 20.60 | 20.90 | 9.04E-40 | 5.11E-15 | 5.11E-15 | 1.22E-14 | 9.32E-01 | 2.92E-02 | 1.19E-01 |
| 147.07652 | 133.55 | 12.23 | 14.16 | 13.71 | 13.51 | 9.41E-10 | 7.79E-10 | 2.42E-06 | 1.11E-04 | 4.14E-01 | 1.42E-01 | 9.12E-01 |
| 147.08569 | 23.85  | 16.36 | 15.75 | 15.96 | 16.11 | 1.95E-06 | 5.71E-07 | 2.02E-03 | 1.17E-01 | 2.36E-01 | 1.32E-02 | 6.00E-01 |
| 147.09858 | 63.2   | 16.89 | 16.97 | 18.99 | 18.70 | 2.08E-28 | 9.77E-01 | 3.24E-14 | 4.29E-14 | 4.19E-14 | 9.53E-14 | 4.88E-01 |
| 147.98641 | 28.63  | 14.60 | 14.63 | 14.80 | 14.88 | 7.13E-01 | 1.00E+00 | 8.80E-01 | 7.47E-01 | 9.26E-01 | 8.15E-01 | 9.92E-01 |
| 148.01512 | 295.29 | 16.40 | 16.71 | 16.69 | 15.78 | 1.20E-04 | 4.60E-01 | 5.11E-01 | 2.45E-02 | 1.00E+00 | 2.63E-04 | 3.27E-04 |
| 148.01572 | 18.85  | 14.31 | 11.27 | 11.15 | 11.89 | 5.80E-26 | 3.46E-14 | 2.22E-14 | 1.09E-13 | 9.75E-01 | 1.75E-01 | 6.73E-02 |
| 148.04028 | 197.22 | 17.07 | 15.87 | 16.16 | 16.11 | 4.29E-11 | 9.97E-11 | 8.82E-07 | 6.49E-07 | 3.32E-01 | 5.06E-01 | 9.95E-01 |
| 148.04369 | 167.01 | 16.45 | 16.84 | 17.14 | 17.38 | 9.43E-06 | 1.48E-01 | 9.80E-04 | 7.22E-06 | 3.65E-01 | 2.52E-02 | 5.79E-01 |
| 148.04383 | 27.97  | 21.22 | 20.35 | 20.72 | 20.72 | 2.54E-15 | 4.37E-14 | 1.21E-06 | 4.04E-06 | 1.05E-03 | 1.32E-03 | 1.00E+00 |
| 148.05173 | 26.18  | 21.22 | 20.43 | 20.17 | 20.06 | 1.67E-24 | 4.26E-12 | 4.30E-14 | 3.13E-14 | 7.29E-02 | 5.33E-03 | 7.53E-01 |
| 148.06136 | 287.52 | 25.25 | 23.68 | 22.95 | 24.54 | 1.78E-21 | 3.39E-11 | 3.42E-14 | 7.63E-03 | 6.14E-03 | 1.24E-03 | 1.70E-10 |
| 148.0708  | 291.11 | 17.59 | 16.62 | 16.73 | 16.92 | 9.87E-13 | 9.06E-12 | 1.02E-09 | 5.03E-06 | 8.31E-01 | 1.31E-01 | 5.17E-01 |
| 148.0879  | 228.88 | 17.42 | 13.67 | 14.01 | 13.75 | 3.87E-23 | 4.53E-14 | 4.15E-14 | 4.52E-14 | 8.21E-01 | 9.97E-01 | 9.18E-01 |
| 148.09782 | 56.06  | 14.41 | 11.82 | 14.01 | 14.09 | 1.29E-21 | 4.06E-14 | 3.79E-01 | 5.98E-01 | 4.88E-14 | 5.17E-14 | 9.91E-01 |
| 148.14918 | 130.14 | 14.02 | 12.65 | 12.77 | 13.18 | 1.67E-12 | 2.17E-11 | 6.24E-10 | 9.37E-05 | 9.25E-01 | 3.88E-02 | 1.56E-01 |
| 148.98009 | 26.14  | 19.21 | 19.12 | 19.42 | 18.98 | 2.01E-01 | 9.76E-01 | 6.93E-01 | 6.87E-01 | 4.57E-01 | 9.05E-01 | 1.50E-01 |
| 148.99103 | 169.17 | 13.93 | 14.82 | 15.04 | 15.30 | 1.98E-06 | 3.65E-03 | 1.19E-04 | 2.54E-06 | 8.34E-01 | 2.78E-01 | 7.56E-01 |
| 149.0094  | 229.56 | 17.66 | 18.20 | 18.32 | 18.30 | 1.49E-07 | 1.04E-04 | 1.26E-06 | 6.15E-06 | 8.04E-01 | 8.85E-01 | 9.99E-01 |
| 149.00941 | 291.51 | 16.53 | 16.56 | 16.86 | 16.66 | 5.30E-02 | 9.96E-01 | 5.06E-02 | 7.40E-01 | 1.02E-01 | 8.62E-01 | 4.70E-01 |
| 149.01018 | 18.98  | 15.38 | 15.74 | 15.17 | 15.89 | 8.71E-03 | 3.90E-01 | 7.59E-01 | 1.19E-01 | 6.14E-02 | 9.10E-01 | 1.11E-02 |

|           |        |       |       |       |       |          |          |          |          |          |          |          |
|-----------|--------|-------|-------|-------|-------|----------|----------|----------|----------|----------|----------|----------|
| 149.02424 | 290.53 | 16.73 | 16.70 | 16.50 | 16.67 | 5.02E-01 | 9.96E-01 | 4.70E-01 | 9.81E-01 | 6.34E-01 | 9.98E-01 | 7.52E-01 |
| 149.02429 | 171.01 | 17.46 | 17.23 | 17.46 | 17.50 | 1.61E-01 | 2.67E-01 | 1.00E+00 | 9.91E-01 | 2.76E-01 | 1.85E-01 | 9.93E-01 |
| 149.03543 | 290.58 | 17.21 | 16.70 | 16.73 | 16.65 | 8.79E-06 | 2.27E-04 | 3.89E-04 | 5.14E-05 | 9.98E-01 | 9.70E-01 | 9.26E-01 |
| 149.0457  | 22     | 18.50 | 19.36 | 18.98 | 19.33 | 6.01E-05 | 1.43E-04 | 7.08E-02 | 4.37E-04 | 2.55E-01 | 9.98E-01 | 3.60E-01 |
| 149.04671 | 277.36 | 20.89 | 19.29 | 19.65 | 19.35 | 8.25E-26 | 2.51E-14 | 4.87E-14 | 4.06E-14 | 6.97E-02 | 9.81E-01 | 1.87E-01 |
| 149.05521 | 25.64  | 24.29 | 24.10 | 24.02 | 23.76 | 1.51E-02 | 6.30E-01 | 3.00E-01 | 6.70E-03 | 9.52E-01 | 1.73E-01 | 4.08E-01 |
| 149.05936 | 172.36 | 16.04 | 14.20 | 14.01 | 14.80 | 6.72E-09 | 6.05E-07 | 2.30E-08 | 2.00E-03 | 9.43E-01 | 3.31E-01 | 1.12E-01 |
| 149.06054 | 283.65 | 16.85 | 16.70 | 16.36 | 16.58 | 5.21E-04 | 5.82E-01 | 2.05E-04 | 1.11E-01 | 2.43E-02 | 7.55E-01 | 2.83E-01 |
| 149.06469 | 282.13 | 20.89 | 19.81 | 19.77 | 20.19 | 2.70E-04 | 1.14E-03 | 5.41E-04 | 8.08E-02 | 9.99E-01 | 5.92E-01 | 4.89E-01 |
| 149.08314 | 286.58 | 16.98 | 16.80 | 16.70 | 16.45 | 2.94E-01 | 9.02E-01 | 7.11E-01 | 2.22E-01 | 9.84E-01 | 6.15E-01 | 8.17E-01 |
| 149.09712 | 92.25  | 15.14 | 13.64 | 14.12 | 14.46 | 1.45E-21 | 2.66E-14 | 5.34E-12 | 1.14E-05 | 3.48E-03 | 1.98E-07 | 8.17E-02 |
| 149.99594 | 293.42 | 16.14 | 16.74 | 16.70 | 15.76 | 6.82E-04 | 9.71E-02 | 1.34E-01 | 4.69E-01 | 9.99E-01 | 2.14E-03 | 3.33E-03 |
| 150.00896 | 217.97 | 15.14 | 15.41 | 15.45 | 15.36 | 7.74E-01 | 8.34E-01 | 7.70E-01 | 9.11E-01 | 1.00E+00 | 9.99E-01 | 9.94E-01 |
| 150.01956 | 131.91 | 14.99 | 13.95 | 13.99 | 14.14 | 7.01E-12 | 3.89E-10 | 1.20E-09 | 8.30E-07 | 9.94E-01 | 6.16E-01 | 7.61E-01 |
| 150.03069 | 289.85 | 19.82 | 19.18 | 19.50 | 18.68 | 3.19E-18 | 2.87E-07 | 2.47E-02 | 4.22E-14 | 3.00E-02 | 1.60E-04 | 1.54E-10 |
| 150.03966 | 27.2   | 16.00 | 15.52 | 15.38 | 15.52 | 2.80E-04 | 8.93E-03 | 2.35E-04 | 1.03E-02 | 7.80E-01 | 1.00E+00 | 8.11E-01 |
| 150.04214 | 179.71 | 14.67 | 13.85 | 13.41 | 14.07 | 1.96E-05 | 6.34E-03 | 5.32E-06 | 9.50E-02 | 3.35E-01 | 8.27E-01 | 6.17E-02 |
| 150.04216 | 23.51  | 16.97 | 16.50 | 17.03 | 16.84 | 3.36E-02 | 6.47E-02 | 9.88E-01 | 9.20E-01 | 3.23E-02 | 3.07E-01 | 7.87E-01 |
| 150.05022 | 213.58 | 14.67 | 10.23 | 11.23 | 10.41 | 2.91E-08 | 2.58E-07 | 8.23E-05 | 1.61E-06 | 5.96E-01 | 9.96E-01 | 7.50E-01 |
| 150.05592 | 178.58 | 17.94 | 17.30 | 17.34 | 17.67 | 6.08E-10 | 1.15E-08 | 7.07E-08 | 4.73E-02 | 9.80E-01 | 4.39E-03 | 1.35E-02 |
| 150.05939 | 20.04  | 16.43 | 16.69 | 16.61 | 16.35 | 1.23E-01 | 3.28E-01 | 6.20E-01 | 9.51E-01 | 9.62E-01 | 1.48E-01 | 3.41E-01 |
| 150.06688 | 246.82 | 21.46 | 19.13 | 19.41 | 19.03 | 7.52E-56 | 5.11E-15 | 5.11E-15 | 5.11E-15 | 1.28E-01 | 8.62E-01 | 1.96E-02 |
| 150.54211 | 64.64  | 14.30 | 15.42 | 12.75 | 13.30 | 1.81E-88 | 5.11E-15 | 5.11E-15 | 6.00E-15 | 5.11E-15 | 5.11E-15 | 1.54E-09 |
| 150.88675 | 25.3   | 16.87 | 15.79 | 15.48 | 16.39 | 4.81E-09 | 1.24E-05 | 8.51E-09 | 1.54E-01 | 5.25E-01 | 5.26E-02 | 6.82E-04 |
| 150.94697 | 103.17 | 14.82 | 14.42 | 14.62 | 15.07 | 8.81E-06 | 6.11E-03 | 3.50E-01 | 1.86E-01 | 3.65E-01 | 4.60E-06 | 2.71E-03 |
| 150.96234 | 131.52 | 16.85 | 16.26 | 15.78 | 16.56 | 1.94E-09 | 1.74E-03 | 6.19E-10 | 2.90E-01 | 1.59E-02 | 3.00E-01 | 2.81E-05 |
| 150.98674 | 155.94 | 13.60 | 14.38 | 14.72 | 15.27 | 3.20E-06 | 4.95E-02 | 1.35E-03 | 1.12E-06 | 6.98E-01 | 3.00E-02 | 3.05E-01 |
| 151.00712 | 18.32  | 13.82 | 11.80 | 11.92 | 14.51 | 5.29E-28 | 6.27E-14 | 2.91E-13 | 2.77E-02 | 9.63E-01 | 3.22E-14 | 4.06E-14 |
| 151.01473 | 291.64 | 15.42 | 16.18 | 16.23 | 15.22 | 1.76E-04 | 2.26E-02 | 1.27E-02 | 8.84E-01 | 9.98E-01 | 3.83E-03 | 1.99E-03 |
| 151.02619 | 26.34  | 24.84 | 24.18 | 24.25 | 24.87 | 2.44E-04 | 4.40E-03 | 1.38E-02 | 9.99E-01 | 9.82E-01 | 5.03E-03 | 1.48E-02 |
| 151.03423 | 206.74 | 13.78 | 8.11  | 7.93  | 8.34  | 1.66E-16 | 1.26E-12 | 2.09E-13 | 2.70E-11 | 9.95E-01 | 9.91E-01 | 9.51E-01 |
| 151.03992 | 265.48 | 17.32 | 17.17 | 17.26 | 17.47 | 8.67E-02 | 5.48E-01 | 9.50E-01 | 5.50E-01 | 8.64E-01 | 5.63E-02 | 2.74E-01 |
| 151.04313 | 138.48 | 15.30 | 15.23 | 15.35 | 15.24 | 7.95E-01 | 9.49E-01 | 9.77E-01 | 9.78E-01 | 7.91E-01 | 9.99E-01 | 8.65E-01 |
| 151.05113 | 289.94 | 17.76 | 17.02 | 16.92 | 17.16 | 3.60E-15 | 2.62E-11 | 9.26E-14 | 1.57E-07 | 7.94E-01 | 5.44E-01 | 1.16E-01 |
| 151.06199 | 22.07  | 21.13 | 21.76 | 21.64 | 21.27 | 3.71E-05 | 1.25E-04 | 2.39E-03 | 7.91E-01 | 8.62E-01 | 8.05E-03 | 6.58E-02 |
| 151.06236 | 291.1  | 17.59 | 16.93 | 16.98 | 16.92 | 9.35E-10 | 7.89E-08 | 6.82E-07 | 1.18E-07 | 9.67E-01 | 1.00E+00 | 9.53E-01 |
| 151.07062 | 225.93 | 17.91 | 15.32 | 15.20 | 14.09 | 7.19E-35 | 4.13E-14 | 3.11E-14 | 5.11E-15 | 9.64E-01 | 3.11E-05 | 1.89E-04 |
| 151.07633 | 199.49 | 16.57 | 15.50 | 15.70 | 15.86 | 1.16E-16 | 4.27E-14 | 1.44E-11 | 1.05E-07 | 3.44E-01 | 2.15E-02 | 5.67E-01 |
| 151.11273 | 148.25 | 15.33 | 13.81 | 13.48 | 13.95 | 3.07E-25 | 4.31E-14 | 1.20E-14 | 8.73E-14 | 1.84E-01 | 8.41E-01 | 2.78E-02 |
| 152.00221 | 288.59 | 16.82 | 17.05 | 17.35 | 17.14 | 4.87E-02 | 6.41E-01 | 2.61E-02 | 3.66E-01 | 3.86E-01 | 9.67E-01 | 7.00E-01 |
| 152.00235 | 17.57  | 21.74 | 24.00 | 23.45 | 23.43 | 1.46E-25 | 9.10E-15 | 4.37E-14 | 5.00E-14 | 2.74E-02 | 2.42E-02 | 9.99E-01 |
| 152.00998 | 292.54 | 14.84 | 16.38 | 16.29 | 15.04 | 3.16E-07 | 2.01E-05 | 5.87E-05 | 9.33E-01 | 9.92E-01 | 6.32E-04 | 1.55E-03 |
| 152.02325 | 24.09  | 18.35 | 16.91 | 17.03 | 17.90 | 4.00E-17 | 7.01E-14 | 1.54E-12 | 5.22E-02 | 8.94E-01 | 6.14E-07 | 1.31E-05 |
| 152.02952 | 20.13  | 20.49 | 19.48 | 19.64 | 20.31 | 4.72E-09 | 1.54E-07 | 9.36E-06 | 7.48E-01 | 8.20E-01 | 6.43E-05 | 1.60E-03 |
| 152.03515 | 288.11 | 16.80 | 16.50 | 16.39 | 16.61 | 1.14E-01 | 3.20E-01 | 8.41E-02 | 7.17E-01 | 9.22E-01 | 9.33E-01 | 6.16E-01 |

|           |        |       |       |       |       |          |          |          |          |          |          |          |
|-----------|--------|-------|-------|-------|-------|----------|----------|----------|----------|----------|----------|----------|
| 152.03521 | 174.66 | 17.80 | 17.56 | 17.81 | 18.18 | 3.53E-07 | 6.59E-02 | 1.00E+00 | 1.27E-03 | 5.71E-02 | 4.76E-08 | 2.39E-03 |
| 152.04342 | 135.22 | 14.88 | 13.84 | 13.32 | 13.88 | 7.69E-17 | 8.27E-09 | 4.34E-14 | 8.55E-08 | 1.25E-02 | 9.93E-01 | 6.76E-03 |
| 152.0464  | 290.3  | 19.64 | 18.82 | 19.24 | 18.61 | 6.25E-10 | 1.20E-06 | 4.87E-02 | 2.03E-09 | 3.36E-02 | 5.56E-01 | 5.12E-04 |
| 152.07158 | 140.33 | 15.52 | 14.26 | 14.73 | 14.86 | 1.22E-09 | 1.70E-10 | 9.15E-05 | 2.52E-03 | 5.07E-02 | 9.01E-03 | 9.01E-01 |
| 152.88378 | 25.37  | 16.63 | 15.71 | 15.10 | 16.23 | 5.33E-07 | 4.84E-03 | 2.83E-07 | 4.97E-01 | 1.30E-01 | 2.62E-01 | 5.41E-04 |
| 152.9391  | 179.37 | 15.18 | 14.75 | 14.75 | 14.51 | 3.08E-04 | 2.49E-02 | 2.32E-02 | 1.33E-04 | 1.00E+00 | 4.31E-01 | 4.22E-01 |
| 152.97805 | 144.62 | 19.91 | 20.93 | 20.63 | 20.90 | 3.05E-05 | 8.73E-05 | 1.00E-02 | 2.50E-04 | 5.73E-01 | 9.99E-01 | 6.81E-01 |
| 152.97811 | 33.57  | 19.92 | 21.68 | 21.67 | 21.37 | 9.54E-22 | 4.26E-14 | 4.52E-14 | 1.68E-12 | 1.00E+00 | 3.81E-01 | 3.85E-01 |
| 152.98283 | 133.54 | 15.29 | 15.56 | 15.71 | 15.55 | 6.71E-04 | 3.83E-02 | 2.36E-04 | 6.81E-02 | 4.81E-01 | 9.99E-01 | 4.11E-01 |
| 152.99572 | 172.43 | 16.30 | 15.70 | 15.76 | 15.74 | 6.42E-17 | 8.37E-14 | 3.48E-12 | 5.00E-12 | 8.69E-01 | 9.48E-01 | 9.97E-01 |
| 152.99594 | 16.97  | 21.41 | 21.32 | 21.46 | 21.21 | 5.78E-02 | 8.06E-01 | 9.46E-01 | 1.47E-01 | 4.92E-01 | 6.14E-01 | 4.71E-02 |
| 153.00181 | 19.61  | 14.17 | 15.71 | 15.16 | 15.27 | 3.35E-08 | 1.29E-08 | 3.90E-04 | 1.33E-04 | 1.33E-01 | 3.21E-01 | 9.79E-01 |
| 153.00575 | 20.67  | 18.17 | 18.98 | 18.51 | 18.57 | 5.99E-04 | 1.52E-04 | 2.75E-01 | 1.63E-01 | 6.91E-02 | 1.73E-01 | 9.87E-01 |
| 153.01942 | 20.89  | 17.32 | 17.23 | 17.30 | 17.36 | 9.14E-01 | 9.55E-01 | 9.99E-01 | 9.96E-01 | 9.84E-01 | 8.96E-01 | 9.84E-01 |
| 153.03036 | 289.6  | 17.33 | 17.37 | 17.27 | 17.10 | 3.09E-01 | 9.94E-01 | 9.77E-01 | 3.94E-01 | 9.16E-01 | 2.87E-01 | 6.53E-01 |
| 153.04173 | 99.86  | 15.64 | 13.90 | 14.04 | 14.51 | 8.48E-30 | 5.33E-15 | 1.22E-14 | 7.42E-13 | 7.66E-01 | 2.62E-04 | 7.25E-03 |
| 153.04991 | 208.33 | 14.34 | 9.86  | 10.62 | 9.10  | 2.01E-10 | 1.06E-07 | 1.10E-05 | 1.29E-09 | 7.64E-01 | 7.86E-01 | 2.34E-01 |
| 153.05556 | 288.11 | 16.74 | 16.53 | 16.70 | 16.66 | 4.80E-01 | 4.29E-01 | 9.91E-01 | 9.46E-01 | 6.28E-01 | 8.03E-01 | 9.94E-01 |
| 153.05565 | 183.87 | 17.69 | 17.50 | 17.59 | 17.95 | 1.28E-05 | 1.37E-01 | 6.82E-01 | 1.43E-02 | 7.26E-01 | 6.89E-06 | 4.45E-04 |
| 153.05901 | 27.83  | 16.28 | 15.79 | 15.63 | 15.53 | 2.88E-06 | 5.10E-03 | 6.45E-05 | 6.57E-06 | 7.03E-01 | 3.30E-01 | 9.14E-01 |
| 153.06695 | 208.85 | 17.83 | 15.46 | 15.23 | 15.73 | 2.54E-41 | 5.11E-15 | 5.11E-15 | 6.22E-15 | 5.27E-01 | 4.30E-01 | 2.44E-02 |
| 153.07821 | 209.37 | 14.82 | 8.42  | 7.22  | 7.36  | 6.92E-27 | 4.40E-14 | 2.02E-14 | 3.57E-14 | 3.09E-01 | 4.49E-01 | 9.97E-01 |
| 153.09195 | 289.94 | 17.07 | 16.72 | 16.78 | 16.86 | 7.39E-03 | 6.89E-03 | 2.83E-02 | 2.20E-01 | 9.63E-01 | 6.14E-01 | 8.72E-01 |
| 153.12839 | 130.27 | 14.93 | 14.25 | 14.36 | 14.51 | 8.96E-07 | 9.72E-07 | 6.08E-05 | 8.46E-03 | 7.94E-01 | 1.86E-01 | 6.69E-01 |
| 153.98146 | 50.23  | 14.82 | 15.51 | 15.19 | 15.41 | 9.47E-04 | 8.50E-04 | 1.71E-01 | 8.92E-03 | 2.82E-01 | 9.43E-01 | 6.41E-01 |
| 153.9983  | 20.31  | 16.31 | 18.82 | 18.05 | 18.31 | 5.42E-23 | 2.46E-14 | 2.12E-12 | 5.23E-14 | 5.05E-03 | 1.38E-01 | 6.90E-01 |
| 154.00663 | 19.67  | 13.25 | 15.71 | 14.83 | 15.09 | 4.34E-11 | 2.53E-11 | 2.01E-05 | 1.32E-06 | 5.39E-02 | 3.00E-01 | 8.84E-01 |
| 154.01219 | 29.11  | 16.28 | 15.76 | 16.25 | 15.55 | 1.68E-06 | 3.59E-03 | 9.96E-01 | 2.47E-05 | 9.03E-03 | 5.57E-01 | 8.87E-05 |
| 154.01442 | 291.57 | 15.98 | 16.33 | 16.23 | 16.56 | 1.89E-02 | 2.00E-01 | 4.79E-01 | 9.30E-03 | 9.48E-01 | 6.20E-01 | 2.99E-01 |
| 154.01446 | 172.05 | 16.19 | 15.49 | 15.47 | 16.16 | 2.31E-14 | 2.75E-09 | 8.11E-10 | 9.87E-01 | 9.99E-01 | 1.00E-07 | 3.57E-08 |
| 154.01807 | 22.23  | 14.39 | 15.53 | 15.20 | 15.01 | 1.88E-05 | 7.29E-06 | 2.30E-03 | 4.22E-02 | 4.97E-01 | 1.41E-01 | 8.56E-01 |
| 154.02567 | 294.58 | 16.25 | 16.82 | 16.78 | 16.42 | 8.91E-05 | 3.96E-04 | 1.17E-03 | 6.34E-01 | 9.89E-01 | 3.82E-02 | 7.85E-02 |
| 154.02575 | 103.91 | 16.04 | 14.07 | 14.17 | 14.93 | 1.52E-32 | 5.11E-15 | 5.33E-15 | 4.83E-11 | 8.99E-01 | 9.87E-07 | 1.93E-05 |
| 154.03837 | 64.88  | 15.49 | 16.50 | 14.55 | 14.83 | 3.68E-76 | 5.11E-15 | 5.11E-15 | 4.29E-14 | 5.11E-15 | 5.11E-15 | 7.53E-04 |
| 154.04093 | 291.26 | 17.14 | 16.34 | 16.63 | 16.50 | 2.49E-02 | 1.93E-02 | 2.38E-01 | 1.01E-01 | 7.23E-01 | 9.49E-01 | 9.65E-01 |
| 154.05088 | 173.46 | 17.27 | 17.05 | 17.23 | 17.55 | 2.17E-04 | 1.55E-01 | 9.86E-01 | 4.61E-02 | 3.10E-01 | 5.36E-05 | 2.16E-02 |
| 154.05768 | 24.54  | 20.61 | 20.47 | 20.40 | 20.08 | 1.23E-02 | 8.09E-01 | 5.22E-01 | 5.89E-03 | 9.69E-01 | 8.45E-02 | 2.08E-01 |
| 154.06226 | 29.25  | 22.86 | 22.88 | 22.83 | 22.66 | 1.90E-01 | 9.99E-01 | 9.90E-01 | 2.38E-01 | 9.70E-01 | 2.00E-01 | 4.05E-01 |
| 154.08725 | 194.23 | 16.04 | 15.22 | 15.02 | 15.85 | 6.59E-10 | 7.80E-06 | 1.22E-08 | 6.75E-01 | 6.29E-01 | 2.04E-03 | 1.57E-05 |
| 154.88084 | 24.99  | 14.68 | 12.76 | 11.75 | 13.87 | 1.44E-14 | 5.29E-07 | 6.31E-14 | 1.06E-01 | 2.61E-02 | 1.45E-02 | 1.27E-07 |
| 154.91545 | 94.1   | 15.44 | 15.90 | 15.74 | 15.54 | 6.83E-06 | 7.14E-06 | 5.71E-03 | 6.93E-01 | 3.43E-01 | 1.72E-03 | 1.65E-01 |
| 154.91861 | 129.13 | 15.22 | 15.11 | 15.18 | 15.44 | 7.62E-03 | 6.29E-01 | 9.76E-01 | 9.67E-02 | 8.66E-01 | 4.55E-03 | 4.09E-02 |
| 154.92832 | 24.68  | 20.82 | 21.13 | 21.08 | 21.45 | 6.58E-07 | 1.77E-02 | 6.00E-02 | 8.40E-08 | 9.68E-01 | 1.97E-02 | 4.45E-03 |
| 154.94725 | 286.67 | 16.67 | 16.52 | 16.58 | 17.04 | 3.19E-02 | 8.24E-01 | 9.51E-01 | 1.83E-01 | 9.88E-01 | 2.94E-02 | 6.47E-02 |
| 154.97505 | 117.15 | 17.62 | 18.75 | 18.11 | 19.05 | 2.93E-07 | 8.19E-05 | 2.15E-01 | 6.99E-07 | 6.69E-02 | 6.81E-01 | 2.76E-03 |

|           |        |       |       |       |       |          |          |          |          |          |          |          |
|-----------|--------|-------|-------|-------|-------|----------|----------|----------|----------|----------|----------|----------|
| 154.9961  | 153.64 | 16.55 | 16.54 | 16.42 | 17.29 | 7.72E-09 | 1.00E+00 | 7.56E-01 | 1.50E-06 | 7.98E-01 | 2.41E-06 | 2.06E-08 |
| 154.99618 | 51.04  | 18.02 | 18.70 | 19.19 | 19.20 | 1.66E-28 | 8.11E-10 | 9.33E-15 | 1.47E-14 | 1.15E-05 | 1.68E-05 | 1.00E+00 |
| 155.00159 | 271.23 | 18.98 | 18.57 | 18.75 | 19.47 | 1.24E-03 | 2.34E-01 | 6.90E-01 | 1.44E-01 | 8.60E-01 | 8.00E-04 | 1.02E-02 |
| 155.00966 | 290.65 | 17.27 | 16.77 | 16.91 | 17.49 | 1.65E-06 | 1.55E-03 | 4.09E-02 | 3.84E-01 | 7.28E-01 | 5.32E-06 | 3.53E-04 |
| 155.00975 | 137.46 | 16.89 | 15.64 | 15.89 | 16.36 | 5.22E-18 | 4.29E-14 | 4.87E-12 | 6.70E-04 | 2.38E-01 | 3.45E-06 | 5.12E-03 |
| 155.00994 | 20.16  | 17.38 | 16.66 | 17.01 | 17.34 | 1.16E-07 | 3.68E-07 | 2.41E-02 | 9.92E-01 | 3.52E-02 | 5.70E-06 | 7.42E-02 |
| 155.03605 | 289.88 | 20.14 | 16.86 | 17.73 | 16.86 | 2.57E-28 | 1.04E-14 | 4.93E-14 | 1.64E-14 | 1.32E-02 | 1.00E+00 | 1.81E-02 |
| 155.04606 | 292.51 | 17.01 | 17.00 | 16.92 | 17.11 | 5.98E-01 | 1.00E+00 | 8.81E-01 | 8.99E-01 | 9.23E-01 | 8.71E-01 | 5.12E-01 |
| 155.04613 | 175.38 | 18.04 | 15.47 | 16.05 | 16.47 | 8.60E-19 | 4.24E-14 | 2.32E-12 | 8.88E-08 | 1.24E-01 | 1.70E-03 | 4.10E-01 |
| 155.05445 | 20.87  | 18.35 | 18.58 | 17.75 | 17.93 | 8.43E-03 | 8.06E-01 | 9.44E-02 | 3.92E-01 | 1.02E-02 | 8.22E-02 | 9.13E-01 |
| 155.05898 | 27.62  | 14.66 | 14.52 | 14.90 | 15.10 | 7.48E-02 | 9.20E-01 | 7.01E-01 | 2.31E-01 | 3.40E-01 | 7.07E-02 | 8.35E-01 |
| 155.0654  | 48.74  | 17.32 | 17.70 | 17.74 | 17.80 | 1.15E-04 | 4.79E-03 | 1.21E-03 | 3.02E-04 | 9.85E-01 | 8.47E-01 | 9.63E-01 |
| 155.07121 | 274.47 | 17.89 | 17.61 | 17.74 | 17.87 | 9.09E-02 | 9.80E-02 | 5.87E-01 | 9.99E-01 | 7.26E-01 | 1.70E-01 | 7.14E-01 |
| 155.08242 | 290.14 | 15.57 | 16.67 | 16.64 | 16.89 | 1.27E-09 | 1.20E-06 | 2.00E-06 | 1.09E-08 | 9.99E-01 | 7.40E-01 | 6.45E-01 |
| 155.08255 | 195.73 | 16.20 | 15.49 | 15.41 | 15.44 | 3.48E-07 | 4.52E-05 | 3.74E-06 | 1.99E-05 | 9.61E-01 | 9.91E-01 | 9.98E-01 |
| 155.10757 | 282.82 | 18.39 | 16.85 | 16.96 | 16.98 | 2.10E-21 | 4.40E-14 | 4.22E-14 | 5.02E-14 | 9.06E-01 | 8.79E-01 | 1.00E+00 |
| 155.94683 | 132.48 | 15.45 | 14.78 | 14.65 | 15.10 | 4.21E-06 | 2.14E-04 | 5.99E-06 | 1.44E-01 | 8.74E-01 | 2.25E-01 | 4.06E-02 |
| 155.99141 | 92.33  | 14.57 | 13.30 | 13.94 | 14.31 | 9.74E-09 | 4.93E-09 | 7.77E-03 | 5.78E-01 | 9.72E-03 | 1.42E-05 | 2.74E-01 |
| 156.00499 | 291.63 | 15.35 | 16.28 | 16.22 | 15.84 | 8.32E-04 | 1.58E-03 | 2.99E-03 | 2.29E-01 | 9.97E-01 | 3.54E-01 | 4.64E-01 |
| 156.02783 | 34.47  | 20.06 | 19.32 | 20.02 | 19.50 | 8.53E-08 | 2.27E-06 | 9.89E-01 | 8.21E-04 | 1.57E-05 | 6.28E-01 | 3.21E-03 |
| 156.03035 | 290.83 | 16.81 | 16.84 | 16.98 | 17.36 | 8.68E-05 | 9.92E-01 | 4.75E-01 | 9.89E-05 | 6.77E-01 | 4.78E-04 | 1.83E-02 |
| 156.04085 | 290.08 | 15.40 | 14.98 | 15.83 | 15.79 | 3.25E-03 | 3.34E-01 | 2.87E-01 | 4.07E-01 | 4.77E-03 | 1.13E-02 | 9.99E-01 |
| 156.04144 | 89.84  | 16.35 | 14.73 | 14.95 | 15.08 | 2.10E-29 | 5.77E-15 | 3.02E-14 | 4.25E-14 | 3.56E-01 | 5.96E-02 | 7.85E-01 |
| 156.05354 | 27.96  | 15.22 | 15.35 | 15.10 | 14.74 | 5.75E-02 | 9.25E-01 | 9.41E-01 | 1.45E-01 | 6.51E-01 | 4.06E-02 | 4.06E-01 |
| 156.05666 | 255.16 | 20.69 | 18.01 | 18.29 | 18.82 | 3.47E-58 | 5.11E-15 | 5.11E-15 | 5.11E-15 | 1.29E-01 | 4.27E-08 | 6.37E-04 |
| 156.05673 | 75.34  | 17.31 | 15.21 | 15.69 | 15.80 | 7.07E-43 | 5.11E-15 | 5.11E-15 | 7.55E-15 | 1.11E-03 | 6.30E-05 | 8.31E-01 |
| 156.06643 | 290.71 | 17.99 | 17.42 | 17.21 | 17.58 | 3.15E-07 | 2.11E-04 | 1.17E-07 | 1.84E-02 | 4.22E-01 | 6.73E-01 | 4.51E-02 |
| 156.07646 | 115.02 | 14.54 | 13.82 | 13.97 | 13.16 | 2.98E-06 | 1.79E-02 | 8.45E-02 | 4.72E-07 | 9.35E-01 | 4.84E-02 | 8.52E-03 |
| 156.10287 | 172.9  | 15.11 | 14.46 | 14.44 | 14.56 | 3.23E-06 | 4.18E-05 | 1.70E-05 | 1.12E-03 | 9.99E-01 | 9.05E-01 | 8.38E-01 |
| 156.13955 | 18.87  | 15.73 | 17.25 | 14.84 | 15.09 | 5.56E-79 | 5.11E-15 | 3.24E-14 | 9.87E-12 | 5.11E-15 | 5.11E-15 | 2.02E-02 |
| 156.89481 | 116.45 | 18.10 | 15.61 | 15.53 | 16.48 | 6.27E-39 | 5.11E-15 | 5.11E-15 | 4.29E-14 | 9.68E-01 | 2.21E-05 | 2.31E-06 |
| 156.92541 | 24.3   | 19.06 | 19.28 | 19.34 | 19.66 | 2.19E-06 | 1.59E-01 | 3.95E-02 | 3.37E-07 | 9.47E-01 | 3.29E-03 | 1.68E-02 |
| 156.95452 | 61.9   | 14.99 | 13.53 | 15.06 | 15.14 | 8.67E-10 | 1.96E-07 | 9.92E-01 | 9.39E-01 | 8.35E-08 | 4.99E-08 | 9.91E-01 |
| 156.9675  | 27.65  | 14.72 | 14.75 | 14.66 | 15.42 | 4.23E-03 | 9.99E-01 | 9.92E-01 | 1.22E-02 | 9.79E-01 | 2.20E-02 | 6.19E-03 |
| 156.9907  | 251.87 | 19.30 | 20.08 | 20.04 | 19.34 | 1.19E-05 | 4.71E-04 | 1.08E-03 | 9.98E-01 | 9.95E-01 | 1.97E-03 | 4.11E-03 |
| 156.99081 | 53.53  | 19.58 | 16.75 | 17.80 | 17.92 | 6.12E-19 | 3.93E-14 | 2.37E-09 | 7.08E-08 | 1.12E-03 | 4.08E-04 | 9.80E-01 |
| 157.01189 | 42.48  | 23.84 | 24.70 | 25.15 | 24.85 | 3.50E-33 | 4.37E-14 | 5.11E-15 | 3.49E-14 | 2.20E-05 | 4.41E-01 | 1.09E-02 |
| 157.02528 | 291.75 | 15.78 | 16.94 | 16.72 | 16.87 | 2.61E-09 | 3.25E-08 | 8.22E-06 | 4.70E-07 | 6.69E-01 | 9.85E-01 | 8.76E-01 |
| 157.03393 | 18.46  | 15.73 | 15.90 | 14.88 | 15.57 | 2.02E-02 | 9.58E-01 | 5.59E-02 | 9.67E-01 | 1.75E-02 | 7.88E-01 | 2.09E-01 |
| 157.03675 | 24.01  | 20.33 | 20.60 | 20.13 | 20.29 | 1.22E-06 | 5.40E-03 | 6.16E-02 | 9.69E-01 | 2.21E-07 | 2.17E-03 | 2.18E-01 |
| 157.05175 | 269.31 | 23.08 | 21.35 | 21.40 | 21.33 | 8.74E-30 | 1.62E-14 | 2.13E-14 | 2.04E-14 | 9.92E-01 | 9.99E-01 | 9.74E-01 |
| 157.0608  | 288.53 | 15.62 | 14.31 | 15.33 | 15.38 | 2.43E-02 | 1.84E-02 | 9.11E-01 | 9.52E-01 | 1.14E-01 | 1.06E-01 | 1.00E+00 |
| 157.06129 | 199.24 | 17.30 | 15.97 | 15.82 | 16.37 | 3.76E-24 | 4.37E-14 | 2.46E-14 | 7.88E-10 | 6.96E-01 | 2.78E-02 | 7.53E-04 |
| 157.0699  | 113.94 | 16.08 | 14.47 | 14.72 | 14.58 | 4.00E-18 | 4.33E-14 | 5.68E-12 | 2.98E-13 | 5.45E-01 | 9.48E-01 | 8.78E-01 |
| 157.08687 | 246.31 | 20.88 | 19.84 | 20.36 | 20.26 | 7.97E-05 | 1.84E-05 | 7.72E-02 | 2.92E-02 | 9.10E-02 | 2.65E-01 | 9.70E-01 |

|           |        |       |       |       |       |          |          |          |          |          |          |          |
|-----------|--------|-------|-------|-------|-------|----------|----------|----------|----------|----------|----------|----------|
| 157.12326 | 257.24 | 21.00 | 21.60 | 20.96 | 20.44 | 1.88E-08 | 1.95E-03 | 9.96E-01 | 7.81E-03 | 1.15E-03 | 1.98E-09 | 1.82E-02 |
| 157.94246 | 137.28 | 15.64 | 14.79 | 14.44 | 15.33 | 1.14E-21 | 1.65E-11 | 3.73E-14 | 4.28E-02 | 1.58E-02 | 8.20E-05 | 1.63E-11 |
| 157.98606 | 44.76  | 18.25 | 16.97 | 17.49 | 16.99 | 5.78E-07 | 3.02E-06 | 1.10E-02 | 8.63E-06 | 1.75E-01 | 1.00E+00 | 2.29E-01 |
| 158.00625 | 45.88  | 15.45 | 16.29 | 16.77 | 16.28 | 1.96E-15 | 1.82E-07 | 4.37E-14 | 4.75E-07 | 7.55E-03 | 1.00E+00 | 8.50E-03 |
| 158.01517 | 39.23  | 18.85 | 19.76 | 20.16 | 19.88 | 2.86E-30 | 4.25E-14 | 5.11E-15 | 4.20E-14 | 4.34E-04 | 6.42E-01 | 3.25E-02 |
| 158.03581 | 288.3  | 18.77 | 17.67 | 17.80 | 17.72 | 1.28E-28 | 1.15E-14 | 3.93E-14 | 3.15E-14 | 5.21E-01 | 9.63E-01 | 8.30E-01 |
| 158.03617 | 90.43  | 16.88 | 14.93 | 15.55 | 15.80 | 7.27E-54 | 5.11E-15 | 5.11E-15 | 1.53E-14 | 1.05E-09 | 4.26E-14 | 5.07E-02 |
| 158.04028 | 25.13  | 15.38 | 15.26 | 14.64 | 14.73 | 2.16E-02 | 9.73E-01 | 4.39E-02 | 1.12E-01 | 1.44E-01 | 2.83E-01 | 9.92E-01 |
| 158.04598 | 18.33  | 17.17 | 16.51 | 16.47 | 16.77 | 3.56E-04 | 1.65E-03 | 6.23E-04 | 1.28E-01 | 9.96E-01 | 5.28E-01 | 3.90E-01 |
| 158.04699 | 293.16 | 20.73 | 18.35 | 18.61 | 18.34 | 5.90E-61 | 5.11E-15 | 5.11E-15 | 5.11E-15 | 1.32E-01 | 1.00E+00 | 1.27E-01 |
| 158.05516 | 290.03 | 18.75 | 17.06 | 17.03 | 17.14 | 6.49E-52 | 5.11E-15 | 5.11E-15 | 5.11E-15 | 9.89E-01 | 8.43E-01 | 6.67E-01 |
| 158.06105 | 224.38 | 18.63 | 19.15 | 19.31 | 18.54 | 3.19E-06 | 8.61E-03 | 2.08E-04 | 9.50E-01 | 7.70E-01 | 2.62E-03 | 5.89E-05 |
| 158.07225 | 267.67 | 19.49 | 17.32 | 17.50 | 17.40 | 8.70E-62 | 5.11E-15 | 5.11E-15 | 5.11E-15 | 3.18E-01 | 8.67E-01 | 8.07E-01 |
| 158.08207 | 287.53 | 19.27 | 18.47 | 18.37 | 18.95 | 2.01E-06 | 1.02E-04 | 7.86E-06 | 3.33E-01 | 9.53E-01 | 5.93E-02 | 1.34E-02 |
| 158.12661 | 215.02 | 17.80 | 17.06 | 16.84 | 17.26 | 2.48E-11 | 3.08E-07 | 1.47E-11 | 4.47E-04 | 3.37E-01 | 4.82E-01 | 1.24E-02 |
| 158.89308 | 109.43 | 16.83 | 14.70 | 14.41 | 15.86 | 2.72E-32 | 1.33E-14 | 5.11E-15 | 3.94E-06 | 4.01E-01 | 5.43E-08 | 6.72E-12 |
| 158.89312 | 30.71  | 17.36 | 14.51 | 14.08 | 16.29 | 6.60E-75 | 5.11E-15 | 5.11E-15 | 1.54E-13 | 5.83E-03 | 5.11E-15 | 5.11E-15 |
| 158.9701  | 61.14  | 18.60 | 16.00 | 19.26 | 19.39 | 4.15E-68 | 5.11E-15 | 1.65E-05 | 5.88E-07 | 5.11E-15 | 5.11E-15 | 8.30E-01 |
| 158.97847 | 130.77 | 14.54 | 17.04 | 18.00 | 16.06 | 3.94E-19 | 3.55E-11 | 4.09E-14 | 1.41E-04 | 3.49E-02 | 3.70E-02 | 1.12E-06 |
| 158.98882 | 202.78 | 16.19 | 16.22 | 16.13 | 16.15 | 9.62E-01 | 9.98E-01 | 9.87E-01 | 9.98E-01 | 9.57E-01 | 9.85E-01 | 9.99E-01 |
| 158.98898 | 55.75  | 16.12 | 12.09 | 13.07 | 12.77 | 1.94E-13 | 1.15E-12 | 4.89E-08 | 6.95E-09 | 2.45E-01 | 5.94E-01 | 9.44E-01 |
| 159.01608 | 38.81  | 16.25 | 16.94 | 17.34 | 17.04 | 2.45E-20 | 1.40E-09 | 3.82E-14 | 1.83E-11 | 1.11E-03 | 8.11E-01 | 2.82E-02 |
| 159.03095 | 293.38 | 18.46 | 16.79 | 17.31 | 15.36 | 2.14E-15 | 4.84E-06 | 2.75E-03 | 4.13E-14 | 4.15E-01 | 3.00E-04 | 2.70E-07 |
| 159.04092 | 290.96 | 16.48 | 16.88 | 16.60 | 17.80 | 7.76E-10 | 1.73E-01 | 9.26E-01 | 1.39E-09 | 4.95E-01 | 5.86E-05 | 6.76E-08 |
| 159.04105 | 110.08 | 15.43 | 14.15 | 14.25 | 15.02 | 9.30E-22 | 4.43E-14 | 4.29E-14 | 1.30E-02 | 8.86E-01 | 1.14E-08 | 3.61E-07 |
| 159.06726 | 289.83 | 22.22 | 19.89 | 20.32 | 19.96 | 5.42E-21 | 4.30E-14 | 6.81E-13 | 4.35E-14 | 3.00E-01 | 9.94E-01 | 4.73E-01 |
| 159.07728 | 140.58 | 16.48 | 14.71 | 14.21 | 14.99 | 1.85E-25 | 4.44E-14 | 7.55E-15 | 4.85E-12 | 5.17E-02 | 5.22E-01 | 7.60E-04 |
| 159.08552 | 165.91 | 18.05 | 17.26 | 17.44 | 17.56 | 7.51E-06 | 4.51E-06 | 6.24E-04 | 1.31E-02 | 6.50E-01 | 2.53E-01 | 8.85E-01 |
| 159.10253 | 249.83 | 19.83 | 18.39 | 18.50 | 18.68 | 3.46E-13 | 1.44E-11 | 2.66E-10 | 1.62E-07 | 9.48E-01 | 4.81E-01 | 7.99E-01 |
| 159.11387 | 82.92  | 15.13 | 14.86 | 15.08 | 15.57 | 3.87E-02 | 6.56E-01 | 9.97E-01 | 2.49E-01 | 7.89E-01 | 2.11E-02 | 1.84E-01 |
| 159.89378 | 151.71 | 14.05 | 15.20 | 14.58 | 16.96 | 9.19E-17 | 1.16E-03 | 3.03E-01 | 4.35E-14 | 1.88E-01 | 5.79E-07 | 8.15E-12 |
| 159.89386 | 43.44  | 18.01 | 15.85 | 15.60 | 17.28 | 8.50E-61 | 5.11E-15 | 5.11E-15 | 2.42E-08 | 1.53E-01 | 1.07E-14 | 5.11E-15 |
| 159.93807 | 129.35 | 15.36 | 14.39 | 14.05 | 15.07 | 2.44E-17 | 2.05E-09 | 4.35E-14 | 2.18E-01 | 1.02E-01 | 1.18E-04 | 1.51E-09 |
| 159.98447 | 28.15  | 15.48 | 14.26 | 14.74 | 15.60 | 9.37E-03 | 2.69E-02 | 3.11E-01 | 9.93E-01 | 7.00E-01 | 1.92E-02 | 2.30E-01 |
| 160.02192 | 37.97  | 15.92 | 16.45 | 16.89 | 16.34 | 3.60E-11 | 2.47E-04 | 2.89E-12 | 8.81E-03 | 4.80E-03 | 8.27E-01 | 2.68E-04 |
| 160.02532 | 17.42  | 12.85 | 14.17 | 13.66 | 15.05 | 4.34E-04 | 4.39E-02 | 3.61E-01 | 1.64E-04 | 7.51E-01 | 3.47E-01 | 4.28E-02 |
| 160.04027 | 162.34 | 16.43 | 15.56 | 15.90 | 16.00 | 5.32E-09 | 6.92E-10 | 2.88E-04 | 6.61E-03 | 4.66E-02 | 7.78E-03 | 8.95E-01 |
| 160.04391 | 20.98  | 14.49 | 14.77 | 14.95 | 12.71 | 1.96E-04 | 9.47E-01 | 8.08E-01 | 5.03E-03 | 9.87E-01 | 1.11E-03 | 2.82E-04 |
| 160.05152 | 270.75 | 20.08 | 17.81 | 17.87 | 18.06 | 2.04E-43 | 5.11E-15 | 5.11E-15 | 5.11E-15 | 9.80E-01 | 3.95E-01 | 6.22E-01 |
| 160.06264 | 293.13 | 19.70 | 17.49 | 17.66 | 17.26 | 6.99E-39 | 5.11E-15 | 5.33E-15 | 5.11E-15 | 7.63E-01 | 5.43E-01 | 1.02E-01 |
| 160.07079 | 289.93 | 17.87 | 14.91 | 15.95 | 13.99 | 8.98E-20 | 6.24E-13 | 2.68E-06 | 4.13E-14 | 3.34E-02 | 9.19E-02 | 5.93E-06 |
| 160.10595 | 182.58 | 16.22 | 15.40 | 15.35 | 15.82 | 4.95E-12 | 1.90E-09 | 1.22E-10 | 9.90E-03 | 9.78E-01 | 9.00E-03 | 2.19E-03 |
| 160.89263 | 156.17 | 10.02 | 14.74 | 13.35 | 16.49 | 1.22E-29 | 4.51E-14 | 9.27E-11 | 5.11E-15 | 2.29E-02 | 2.86E-03 | 6.89E-09 |
| 160.89269 | 44.94  | 18.11 | 16.00 | 15.75 | 17.39 | 1.15E-58 | 5.11E-15 | 5.11E-15 | 4.97E-08 | 1.72E-01 | 1.91E-14 | 5.11E-15 |
| 160.91553 | 27.88  | 15.04 | 15.30 | 14.99 | 14.76 | 4.21E-01 | 8.16E-01 | 9.98E-01 | 8.17E-01 | 7.33E-01 | 3.34E-01 | 8.98E-01 |

|           |        |       |       |       |       |          |          |          |          |          |          |          |
|-----------|--------|-------|-------|-------|-------|----------|----------|----------|----------|----------|----------|----------|
| 160.93424 | 116.74 | 16.45 | 15.76 | 15.52 | 16.51 | 3.52E-10 | 1.74E-04 | 1.26E-07 | 9.85E-01 | 4.58E-01 | 1.07E-04 | 1.05E-07 |
| 160.97664 | 161.84 | 16.37 | 14.79 | 14.53 | 14.42 | 1.36E-16 | 4.04E-10 | 3.18E-13 | 1.38E-13 | 6.85E-01 | 4.32E-01 | 9.71E-01 |
| 160.99877 | 24     | 15.32 | 14.95 | 14.10 | 14.33 | 1.08E-04 | 5.70E-01 | 1.59E-04 | 5.28E-03 | 2.15E-02 | 1.80E-01 | 8.66E-01 |
| 161.00931 | 20.68  | 19.24 | 18.98 | 18.70 | 19.24 | 1.86E-04 | 2.28E-01 | 3.99E-04 | 1.00E+00 | 1.66E-01 | 2.74E-01 | 9.24E-04 |
| 161.02439 | 133.76 | 14.55 | 13.91 | 14.02 | 14.02 | 4.74E-06 | 9.44E-06 | 3.40E-04 | 6.06E-04 | 8.27E-01 | 8.38E-01 | 1.00E+00 |
| 161.03565 | 178.6  | 16.37 | 14.44 | 14.40 | 15.07 | 7.17E-31 | 6.22E-15 | 5.33E-15 | 4.90E-13 | 9.94E-01 | 1.10E-03 | 3.65E-04 |
| 161.04655 | 287.49 | 19.01 | 17.32 | 17.27 | 17.17 | 1.47E-08 | 3.05E-06 | 1.25E-06 | 7.02E-07 | 9.99E-01 | 9.75E-01 | 9.91E-01 |
| 161.06074 | 157.11 | 14.65 | 14.05 | 13.68 | 14.16 | 2.50E-06 | 4.23E-03 | 4.68E-07 | 3.27E-02 | 1.72E-01 | 9.43E-01 | 5.27E-02 |
| 161.06512 | 19.41  | 14.39 | 15.71 | 15.39 | 15.67 | 1.99E-03 | 3.76E-03 | 4.35E-02 | 7.19E-03 | 8.48E-01 | 1.00E+00 | 9.01E-01 |
| 161.07207 | 211.07 | 14.93 | 8.95  | 8.54  | 8.80  | 2.84E-21 | 4.43E-14 | 4.41E-14 | 4.46E-14 | 9.34E-01 | 9.97E-01 | 9.83E-01 |
| 161.08318 | 259.15 | 20.64 | 18.21 | 18.42 | 18.40 | 1.62E-73 | 5.11E-15 | 5.11E-15 | 5.11E-15 | 1.74E-01 | 2.61E-01 | 9.99E-01 |
| 161.89404 | 108.39 | 17.05 | 14.91 | 14.67 | 16.18 | 1.42E-38 | 5.11E-15 | 5.11E-15 | 2.93E-06 | 4.59E-01 | 1.31E-11 | 4.40E-14 |
| 161.89406 | 32.26  | 17.36 | 14.67 | 14.17 | 16.41 | 1.12E-69 | 5.11E-15 | 5.11E-15 | 1.52E-10 | 1.60E-03 | 5.77E-15 | 5.11E-15 |
| 161.94453 | 119.08 | 15.21 | 14.77 | 14.42 | 14.53 | 2.37E-05 | 4.96E-02 | 2.21E-05 | 7.38E-04 | 1.67E-01 | 5.42E-01 | 9.08E-01 |
| 161.99405 | 23.74  | 16.76 | 15.76 | 16.13 | 16.28 | 2.35E-07 | 4.57E-08 | 9.00E-04 | 2.79E-02 | 1.39E-01 | 1.74E-02 | 8.10E-01 |
| 162.0196  | 132.86 | 15.52 | 14.09 | 14.23 | 14.99 | 4.54E-15 | 4.42E-13 | 3.54E-11 | 2.17E-02 | 8.62E-01 | 1.91E-05 | 4.03E-04 |
| 162.02318 | 20.7   | 16.17 | 16.23 | 16.13 | 16.49 | 4.55E-02 | 9.61E-01 | 9.89E-01 | 7.92E-02 | 8.62E-01 | 2.43E-01 | 4.21E-02 |
| 162.03073 | 289.97 | 18.10 | 17.60 | 17.70 | 17.19 | 5.06E-11 | 1.72E-04 | 3.20E-03 | 4.35E-12 | 8.59E-01 | 4.83E-03 | 2.53E-04 |
| 162.04106 | 24.95  | 16.12 | 17.04 | 16.86 | 16.79 | 1.51E-18 | 4.37E-14 | 1.21E-12 | 5.86E-10 | 2.82E-01 | 6.63E-02 | 8.75E-01 |
| 162.04199 | 290.75 | 17.01 | 15.78 | 16.04 | 15.95 | 7.04E-03 | 8.53E-03 | 5.34E-02 | 3.70E-02 | 9.17E-01 | 9.78E-01 | 9.96E-01 |
| 162.04885 | 131.85 | 16.21 | 15.77 | 15.58 | 16.08 | 4.26E-07 | 1.31E-03 | 8.28E-07 | 7.16E-01 | 3.72E-01 | 5.94E-02 | 3.14E-04 |
| 162.0558  | 217.13 | 18.09 | 16.60 | 16.38 | 17.34 | 3.83E-11 | 4.65E-08 | 2.11E-10 | 1.84E-02 | 8.12E-01 | 2.63E-02 | 1.47E-03 |
| 162.06717 | 276.81 | 19.76 | 18.26 | 18.48 | 18.42 | 2.90E-32 | 5.11E-15 | 2.15E-14 | 1.82E-14 | 2.75E-01 | 5.98E-01 | 9.59E-01 |
| 162.06729 | 30.26  | 17.59 | 16.29 | 15.19 | 15.51 | 2.23E-39 | 6.46E-14 | 5.11E-15 | 5.11E-15 | 1.55E-10 | 1.73E-05 | 1.86E-01 |
| 162.07694 | 282.41 | 20.52 | 19.25 | 19.03 | 19.95 | 2.19E-21 | 5.12E-14 | 4.15E-14 | 1.25E-03 | 4.38E-01 | 6.36E-05 | 4.63E-08 |
| 162.08661 | 216.89 | 15.91 | 10.94 | 11.07 | 10.30 | 7.31E-13 | 2.89E-09 | 5.47E-09 | 6.60E-11 | 9.98E-01 | 8.54E-01 | 7.64E-01 |
| 162.89344 | 45.6   | 18.67 | 16.65 | 16.50 | 18.00 | 2.36E-56 | 5.11E-15 | 5.11E-15 | 1.58E-07 | 5.67E-01 | 1.91E-14 | 5.33E-15 |
| 162.9126  | 27.81  | 14.25 | 14.31 | 13.63 | 14.03 | 9.54E-02 | 9.98E-01 | 1.36E-01 | 8.74E-01 | 1.06E-01 | 8.01E-01 | 5.57E-01 |
| 162.94755 | 89.95  | 15.58 | 15.47 | 15.61 | 15.48 | 2.12E-01 | 4.56E-01 | 9.90E-01 | 5.78E-01 | 3.06E-01 | 9.99E-01 | 4.14E-01 |
| 162.95707 | 35.05  | 18.34 | 16.36 | 16.85 | 16.47 | 2.13E-06 | 7.99E-06 | 1.17E-03 | 4.76E-05 | 6.25E-01 | 9.93E-01 | 8.00E-01 |
| 162.96799 | 113.11 | 19.25 | 18.28 | 18.79 | 19.29 | 2.34E-12 | 1.14E-10 | 4.58E-03 | 9.95E-01 | 1.86E-03 | 2.48E-10 | 3.75E-03 |
| 163.02501 | 25.3   | 18.19 | 19.58 | 19.50 | 19.21 | 2.13E-16 | 6.51E-14 | 4.29E-13 | 3.20E-08 | 9.54E-01 | 1.49E-01 | 3.64E-01 |
| 163.03424 | 293.33 | 16.87 | 17.10 | 17.20 | 16.84 | 6.73E-02 | 4.18E-01 | 1.38E-01 | 9.98E-01 | 9.35E-01 | 3.71E-01 | 1.25E-01 |
| 163.03999 | 176.8  | 17.60 | 17.17 | 17.28 | 17.37 | 5.36E-04 | 3.08E-04 | 9.93E-03 | 1.36E-01 | 7.61E-01 | 2.76E-01 | 8.26E-01 |
| 163.0513  | 194.08 | 17.54 | 15.16 | 14.96 | 15.49 | 5.61E-37 | 5.11E-15 | 5.11E-15 | 2.64E-14 | 7.04E-01 | 3.01E-01 | 2.72E-02 |
| 163.06242 | 284.87 | 22.54 | 21.04 | 21.23 | 20.97 | 4.55E-33 | 5.77E-15 | 2.71E-14 | 5.33E-15 | 4.22E-01 | 9.39E-01 | 1.65E-01 |
| 163.07632 | 194.1  | 16.59 | 15.57 | 15.71 | 16.10 | 1.33E-13 | 1.16E-12 | 4.84E-10 | 1.70E-03 | 7.17E-01 | 8.41E-04 | 2.33E-02 |
| 163.08046 | 119.24 | 16.92 | 15.88 | 15.79 | 16.45 | 3.42E-19 | 5.72E-14 | 4.23E-14 | 1.15E-03 | 9.12E-01 | 8.90E-05 | 4.23E-06 |
| 163.09892 | 213.69 | 15.87 | 9.53  | 9.94  | 10.13 | 1.26E-43 | 5.11E-15 | 5.11E-15 | 5.11E-15 | 7.55E-01 | 4.98E-01 | 9.70E-01 |
| 163.11275 | 198.56 | 15.99 | 15.31 | 15.26 | 15.28 | 5.95E-08 | 8.59E-06 | 1.40E-06 | 4.99E-06 | 9.88E-01 | 9.95E-01 | 1.00E+00 |
| 163.11284 | 96.39  | 15.22 | 13.03 | 13.70 | 14.10 | 3.78E-19 | 4.14E-14 | 5.06E-11 | 3.63E-06 | 1.31E-02 | 2.23E-05 | 2.78E-01 |
| 163.99112 | 27.06  | 14.47 | 13.22 | 13.40 | 14.01 | 4.69E-05 | 9.82E-05 | 9.73E-04 | 3.90E-01 | 9.32E-01 | 4.46E-02 | 1.67E-01 |
| 163.99999 | 31.82  | 16.38 | 16.60 | 16.35 | 16.20 | 2.47E-02 | 2.84E-01 | 9.92E-01 | 4.82E-01 | 1.84E-01 | 1.23E-02 | 6.65E-01 |
| 164.02136 | 108.13 | 13.85 | 14.57 | 14.78 | 14.65 | 1.29E-02 | 9.44E-02 | 1.32E-02 | 5.70E-02 | 9.02E-01 | 9.94E-01 | 9.77E-01 |
| 164.02813 | 130.22 | 14.82 | 15.37 | 15.81 | 14.90 | 1.04E-10 | 1.43E-03 | 6.39E-10 | 9.55E-01 | 1.89E-02 | 1.47E-02 | 7.41E-08 |

|           |        |       |       |       |       |          |          |          |          |          |          |          |
|-----------|--------|-------|-------|-------|-------|----------|----------|----------|----------|----------|----------|----------|
| 164.0352  | 292.61 | 17.47 | 17.51 | 17.51 | 17.90 | 9.93E-04 | 9.81E-01 | 9.88E-01 | 1.40E-03 | 1.00E+00 | 7.02E-03 | 5.31E-03 |
| 164.03889 | 23.95  | 17.10 | 17.34 | 18.55 | 19.07 | 5.90E-41 | 2.54E-01 | 1.58E-14 | 5.11E-15 | 4.23E-14 | 5.11E-15 | 7.39E-04 |
| 164.04637 | 288.46 | 19.76 | 18.76 | 19.13 | 18.87 | 4.38E-17 | 4.40E-14 | 2.09E-07 | 1.31E-12 | 7.04E-03 | 7.99E-01 | 1.11E-01 |
| 164.04661 | 26.82  | 17.88 | 16.65 | 15.93 | 16.08 | 1.42E-34 | 4.53E-14 | 5.11E-15 | 5.33E-15 | 6.74E-06 | 9.46E-04 | 7.39E-01 |
| 164.05767 | 293.56 | 16.98 | 16.51 | 16.64 | 16.21 | 6.46E-04 | 4.26E-02 | 2.29E-01 | 2.26E-04 | 8.78E-01 | 3.96E-01 | 9.75E-02 |
| 164.06578 | 289.24 | 17.70 | 16.41 | 16.51 | 16.38 | 1.30E-18 | 5.71E-14 | 6.41E-13 | 5.48E-14 | 9.11E-01 | 9.96E-01 | 8.16E-01 |
| 164.06597 | 109.87 | 16.98 | 16.16 | 16.50 | 16.37 | 1.06E-10 | 4.54E-11 | 1.85E-04 | 2.33E-06 | 1.74E-02 | 2.90E-01 | 6.85E-01 |
| 164.07181 | 28.85  | 22.72 | 21.93 | 22.18 | 22.33 | 3.26E-14 | 5.14E-14 | 6.83E-08 | 2.24E-04 | 3.68E-02 | 3.36E-04 | 4.41E-01 |
| 164.08346 | 281.79 | 17.95 | 17.18 | 17.15 | 17.31 | 2.22E-07 | 5.00E-06 | 1.67E-06 | 3.08E-04 | 9.98E-01 | 8.56E-01 | 7.63E-01 |
| 164.83633 | 17.83  | 17.63 | 16.59 | 16.58 | 17.94 | 1.56E-12 | 3.58E-06 | 2.10E-06 | 4.33E-01 | 1.00E+00 | 7.58E-09 | 4.05E-09 |
| 164.89551 | 108.59 | 17.06 | 14.86 | 14.73 | 16.43 | 6.53E-41 | 5.11E-15 | 5.11E-15 | 9.10E-04 | 8.59E-01 | 4.20E-14 | 4.04E-14 |
| 164.89553 | 30.76  | 17.48 | 14.75 | 14.26 | 16.47 | 1.18E-73 | 5.11E-15 | 5.11E-15 | 1.42E-12 | 8.74E-04 | 5.11E-15 | 5.11E-15 |
| 164.9476  | 46.87  | 17.40 | 18.19 | 18.11 | 17.82 | 7.00E-15 | 1.87E-13 | 1.52E-11 | 1.61E-04 | 8.51E-01 | 2.35E-03 | 2.63E-02 |
| 164.95714 | 32.56  | 21.91 | 22.61 | 22.72 | 22.46 | 1.54E-20 | 4.85E-14 | 4.21E-14 | 1.27E-09 | 5.59E-01 | 2.93E-01 | 1.34E-02 |
| 164.96367 | 92     | 14.88 | 14.23 | 14.03 | 14.21 | 4.62E-02 | 1.81E-01 | 3.96E-02 | 1.80E-01 | 9.28E-01 | 1.00E+00 | 9.48E-01 |
| 164.97805 | 148.4  | 16.39 | 15.29 | 14.71 | 15.54 | 7.66E-18 | 4.39E-09 | 4.50E-14 | 1.25E-05 | 4.69E-03 | 5.21E-01 | 2.98E-05 |
| 165.00571 | 20.01  | 14.92 | 10.35 | 11.39 | 12.21 | 2.56E-24 | 1.20E-14 | 4.33E-14 | 9.20E-10 | 5.04E-02 | 6.42E-05 | 1.84E-01 |
| 165.01915 | 293.38 | 18.97 | 17.94 | 17.75 | 18.12 | 2.44E-21 | 4.70E-14 | 4.06E-14 | 1.38E-10 | 3.87E-01 | 4.92E-01 | 1.71E-02 |
| 165.01923 | 173.41 | 19.06 | 18.62 | 18.58 | 18.55 | 4.92E-02 | 1.54E-01 | 8.88E-02 | 8.27E-02 | 9.96E-01 | 9.88E-01 | 1.00E+00 |
| 165.03149 | 97.88  | 15.28 | 13.60 | 14.10 | 14.14 | 9.08E-17 | 4.31E-14 | 1.36E-09 | 1.53E-08 | 3.48E-02 | 2.55E-02 | 9.97E-01 |
| 165.03412 | 19.7   | 13.75 | 15.63 | 15.09 | 15.23 | 1.24E-08 | 1.36E-08 | 6.39E-05 | 1.96E-05 | 3.06E-01 | 5.84E-01 | 9.75E-01 |
| 165.04078 | 18.05  | 20.59 | 21.33 | 21.32 | 21.25 | 3.88E-18 | 5.35E-14 | 5.80E-14 | 1.21E-11 | 9.99E-01 | 8.15E-01 | 8.68E-01 |
| 165.0408  | 212.82 | 19.18 | 18.94 | 18.94 | 18.85 | 2.22E-02 | 1.19E-01 | 1.16E-01 | 1.93E-02 | 1.00E+00 | 8.81E-01 | 8.74E-01 |
| 165.04124 | 294.33 | 17.79 | 17.48 | 17.96 | 17.49 | 5.72E-06 | 1.70E-02 | 3.32E-01 | 2.58E-02 | 5.10E-05 | 1.00E+00 | 1.09E-04 |
| 165.04992 | 276.47 | 17.99 | 18.52 | 18.58 | 18.16 | 7.64E-06 | 3.06E-04 | 3.69E-05 | 5.43E-01 | 9.69E-01 | 4.70E-02 | 1.25E-02 |
| 165.05561 | 282.79 | 17.33 | 17.07 | 16.91 | 17.10 | 1.63E-04 | 3.09E-02 | 4.09E-05 | 8.42E-02 | 2.96E-01 | 9.90E-01 | 1.80E-01 |
| 165.0559  | 21.9   | 16.40 | 16.15 | 16.19 | 15.91 | 6.48E-03 | 2.39E-01 | 3.65E-01 | 2.27E-03 | 9.94E-01 | 3.20E-01 | 1.98E-01 |
| 165.06693 | 176.03 | 17.52 | 16.31 | 16.61 | 16.69 | 8.23E-19 | 4.29E-14 | 7.70E-12 | 1.38E-09 | 8.26E-02 | 2.03E-02 | 9.28E-01 |
| 165.07515 | 22.14  | 18.96 | 17.76 | 18.17 | 18.38 | 2.34E-23 | 1.07E-14 | 1.98E-12 | 6.62E-07 | 5.48E-04 | 1.44E-07 | 2.06E-01 |
| 165.07812 | 265.57 | 19.84 | 17.57 | 17.56 | 17.29 | 5.63E-62 | 5.11E-15 | 5.11E-15 | 5.11E-15 | 1.00E+00 | 1.21E-01 | 1.35E-01 |
| 165.08634 | 208.03 | 14.76 | 9.90  | 9.57  | 10.70 | 4.11E-17 | 2.97E-13 | 4.76E-14 | 2.02E-09 | 9.51E-01 | 5.89E-01 | 2.80E-01 |
| 165.092   | 191.88 | 16.44 | 15.54 | 15.87 | 16.00 | 3.52E-07 | 7.26E-08 | 9.35E-04 | 2.62E-02 | 1.63E-01 | 2.36E-02 | 8.25E-01 |
| 165.96052 | 31.6   | 15.51 | 15.03 | 14.93 | 15.11 | 4.66E-02 | 1.27E-01 | 4.02E-02 | 2.99E-01 | 9.71E-01 | 9.82E-01 | 8.50E-01 |
| 165.97125 | 26.65  | 14.45 | 14.17 | 14.69 | 14.91 | 1.49E-01 | 8.12E-01 | 8.73E-01 | 4.92E-01 | 3.79E-01 | 1.22E-01 | 9.08E-01 |
| 166.0144  | 290.7  | 16.76 | 17.31 | 17.66 | 17.22 | 5.21E-10 | 1.17E-04 | 5.81E-11 | 2.78E-03 | 3.60E-02 | 8.99E-01 | 5.28E-03 |
| 166.01457 | 112.43 | 16.22 | 15.95 | 15.93 | 15.95 | 1.27E-01 | 2.18E-01 | 1.73E-01 | 2.54E-01 | 1.00E+00 | 1.00E+00 | 9.99E-01 |
| 166.01817 | 17.26  | 20.23 | 21.06 | 20.58 | 20.40 | 1.77E-16 | 4.23E-14 | 5.56E-04 | 2.56E-01 | 1.99E-06 | 1.54E-10 | 2.09E-01 |
| 166.0228  | 16.78  | 14.30 | 13.34 | 11.82 | 13.78 | 7.80E-10 | 4.03E-02 | 3.05E-10 | 5.00E-01 | 3.47E-04 | 6.47E-01 | 3.09E-06 |
| 166.02566 | 294.09 | 16.26 | 16.83 | 17.03 | 16.29 | 1.49E-05 | 8.44E-03 | 1.17E-04 | 9.98E-01 | 6.93E-01 | 2.37E-02 | 5.98E-04 |
| 166.02945 | 20.37  | 16.12 | 15.83 | 15.47 | 15.75 | 7.38E-03 | 4.04E-01 | 2.81E-03 | 2.01E-01 | 2.31E-01 | 9.71E-01 | 4.96E-01 |
| 166.03919 | 21.69  | 13.96 | 14.14 | 14.20 | 15.03 | 1.11E-02 | 9.43E-01 | 8.78E-01 | 7.93E-03 | 9.98E-01 | 4.82E-02 | 7.03E-02 |
| 166.04033 | 218.17 | 15.29 | 14.95 | 14.25 | 14.37 | 7.68E-04 | 6.28E-01 | 1.40E-03 | 9.28E-03 | 7.23E-02 | 2.11E-01 | 9.76E-01 |
| 166.04424 | 20.47  | 15.69 | 16.20 | 16.14 | 16.09 | 7.87E-05 | 1.37E-04 | 1.02E-03 | 7.30E-03 | 9.51E-01 | 7.85E-01 | 9.74E-01 |
| 166.05088 | 180.77 | 18.54 | 18.18 | 18.18 | 18.51 | 1.33E-05 | 6.53E-04 | 5.37E-04 | 9.87E-01 | 1.00E+00 | 4.38E-03 | 3.80E-03 |
| 166.06206 | 288.73 | 18.46 | 17.70 | 17.62 | 17.89 | 7.72E-10 | 1.53E-07 | 3.02E-09 | 2.06E-04 | 9.13E-01 | 5.19E-01 | 1.83E-01 |



|           |        |       |       |       |       |          |          |          |          |          |          |          |
|-----------|--------|-------|-------|-------|-------|----------|----------|----------|----------|----------|----------|----------|
| 166.07211 | 20.4   | 16.36 | 13.91 | 13.40 | 15.19 | 1.59E-60 | 5.11E-15 | 5.11E-15 | 7.15E-14 | 1.68E-03 | 4.37E-14 | 5.33E-15 |
| 166.08159 | 188.81 | 16.06 | 15.78 | 15.47 | 15.00 | 7.36E-05 | 5.74E-01 | 3.89E-02 | 3.27E-05 | 5.34E-01 | 5.91E-03 | 1.81E-01 |
| 166.0873  | 136.16 | 15.01 | 14.19 | 14.01 | 14.09 | 1.48E-13 | 1.82E-08 | 4.94E-12 | 6.98E-10 | 5.48E-01 | 8.88E-01 | 9.43E-01 |
| 166.93636 | 168.16 | 9.67  | 18.31 | 17.80 | 10.98 | 5.30E-37 | 5.11E-15 | 5.77E-15 | 2.23E-01 | 8.76E-01 | 4.02E-14 | 4.31E-14 |
| 166.95735 | 145.91 | 14.85 | 13.93 | 13.37 | 14.18 | 9.09E-07 | 2.50E-03 | 1.81E-07 | 6.18E-02 | 1.62E-01 | 7.82E-01 | 1.66E-02 |
| 166.96138 | 31.39  | 15.25 | 14.74 | 14.86 | 14.97 | 2.30E-02 | 1.58E-02 | 1.01E-01 | 3.70E-01 | 8.95E-01 | 5.83E-01 | 9.34E-01 |
| 166.97528 | 21.86  | 19.42 | 23.92 | 23.84 | 23.08 | 4.56E-43 | 5.11E-15 | 5.11E-15 | 5.77E-15 | 9.92E-01 | 3.25E-02 | 6.25E-02 |
| 166.99492 | 48.69  | 18.52 | 18.26 | 18.24 | 18.60 | 1.24E-03 | 6.83E-02 | 3.74E-02 | 8.80E-01 | 9.97E-01 | 1.32E-02 | 6.49E-03 |
| 167.0212  | 17.77  | 24.64 | 24.41 | 24.88 | 24.91 | 5.34E-04 | 2.65E-01 | 2.39E-01 | 1.68E-01 | 2.10E-03 | 1.34E-03 | 9.95E-01 |
| 167.0461  | 290.74 | 16.53 | 16.38 | 16.35 | 16.57 | 3.55E-01 | 7.43E-01 | 5.80E-01 | 9.89E-01 | 9.95E-01 | 5.83E-01 | 4.27E-01 |
| 167.0462  | 181.11 | 17.65 | 15.65 | 15.47 | 16.03 | 9.36E-34 | 5.77E-15 | 5.11E-15 | 4.26E-14 | 7.17E-01 | 1.17E-01 | 6.49E-03 |
| 167.05432 | 119.1  | 14.67 | 14.08 | 13.89 | 14.21 | 1.53E-07 | 8.39E-05 | 7.14E-08 | 5.29E-03 | 5.00E-01 | 7.76E-01 | 9.47E-02 |
| 167.06151 | 196.04 | 16.81 | 16.07 | 15.90 | 16.11 | 1.73E-08 | 1.01E-05 | 2.97E-08 | 6.55E-05 | 6.95E-01 | 9.92E-01 | 5.28E-01 |
| 167.06569 | 253.12 | 21.75 | 22.46 | 21.95 | 22.46 | 1.16E-04 | 9.00E-04 | 7.03E-01 | 1.28E-03 | 3.50E-02 | 1.00E+00 | 4.17E-02 |
| 167.06582 | 27.59  | 24.05 | 23.91 | 23.84 | 23.48 | 8.27E-04 | 7.38E-01 | 4.03E-01 | 3.25E-04 | 9.55E-01 | 1.44E-02 | 5.50E-02 |
| 167.07123 | 289.28 | 17.52 | 17.14 | 17.13 | 17.31 | 8.21E-05 | 3.83E-04 | 2.45E-04 | 1.30E-01 | 1.00E+00 | 3.12E-01 | 2.70E-01 |
| 167.10765 | 167.9  | 16.85 | 15.80 | 15.58 | 16.13 | 4.95E-09 | 2.11E-06 | 6.07E-09 | 3.00E-03 | 7.20E-01 | 4.03E-01 | 4.86E-02 |
| 167.14412 | 143.36 | 14.93 | 13.60 | 13.71 | 14.03 | 1.01E-13 | 2.32E-12 | 6.32E-11 | 4.99E-06 | 9.31E-01 | 8.10E-02 | 2.64E-01 |
| 167.99739 | 23.56  | 16.45 | 16.15 | 16.36 | 16.67 | 2.20E-02 | 2.31E-01 | 9.31E-01 | 5.28E-01 | 5.78E-01 | 1.09E-02 | 2.31E-01 |
| 168.01427 | 20.71  | 14.79 | 15.27 | 14.44 | 14.21 | 1.71E-03 | 2.89E-01 | 5.45E-01 | 1.59E-01 | 1.45E-02 | 1.45E-03 | 8.58E-01 |
| 168.01825 | 20.23  | 17.76 | 17.07 | 17.75 | 17.81 | 1.21E-05 | 1.17E-04 | 1.00E+00 | 9.94E-01 | 2.26E-04 | 1.04E-04 | 9.88E-01 |
| 168.02468 | 19.86  | 20.50 | 20.20 | 20.52 | 20.60 | 6.59E-03 | 4.61E-02 | 9.99E-01 | 8.34E-01 | 3.67E-02 | 6.09E-03 | 9.00E-01 |
| 168.02859 | 34.38  | 18.87 | 19.39 | 19.48 | 18.86 | 2.70E-06 | 2.12E-03 | 1.25E-04 | 9.99E-01 | 9.05E-01 | 2.74E-03 | 2.00E-04 |
| 168.03013 | 154.81 | 16.09 | 14.35 | 14.70 | 15.55 | 2.97E-16 | 5.13E-14 | 2.18E-10 | 4.72E-02 | 3.19E-01 | 2.75E-07 | 4.26E-04 |
| 168.04309 | 29.31  | 21.29 | 23.16 | 23.22 | 22.52 | 3.03E-74 | 5.11E-15 | 5.11E-15 | 5.11E-15 | 8.63E-01 | 4.06E-13 | 4.37E-14 |
| 168.05683 | 216.56 | 16.28 | 10.31 | 10.71 | 10.59 | 1.77E-19 | 4.41E-14 | 6.72E-14 | 9.41E-14 | 9.36E-01 | 9.78E-01 | 9.98E-01 |
| 168.06657 | 161.62 | 16.67 | 15.84 | 15.73 | 16.06 | 4.73E-12 | 4.88E-09 | 2.15E-11 | 4.50E-05 | 8.29E-01 | 3.64E-01 | 6.67E-02 |
| 168.10292 | 168.7  | 16.89 | 16.58 | 16.47 | 17.23 | 3.42E-07 | 9.90E-02 | 9.12E-03 | 5.42E-02 | 8.44E-01 | 3.00E-05 | 5.70E-07 |
| 168.91319 | 93.35  | 13.32 | 14.11 | 14.15 | 14.36 | 1.73E-02 | 1.02E-01 | 7.38E-02 | 1.79E-02 | 9.99E-01 | 8.96E-01 | 9.33E-01 |
| 168.93461 | 96.65  | 14.86 | 14.15 | 14.10 | 14.69 | 1.55E-06 | 1.07E-04 | 2.40E-05 | 7.30E-01 | 9.91E-01 | 1.01E-02 | 3.56E-03 |
| 168.95206 | 56.81  | 20.57 | 18.23 | 21.22 | 21.16 | 2.80E-83 | 5.11E-15 | 4.69E-09 | 2.64E-07 | 5.11E-15 | 5.11E-15 | 9.53E-01 |
| 168.99093 | 17.92  | 21.39 | 22.68 | 22.74 | 22.93 | 1.33E-14 | 9.75E-10 | 1.22E-10 | 1.55E-12 | 9.92E-01 | 6.13E-01 | 7.77E-01 |
| 168.99734 | 170.06 | 16.46 | 17.50 | 17.80 | 18.24 | 7.69E-17 | 4.45E-07 | 5.50E-11 | 4.42E-14 | 4.17E-01 | 1.43E-03 | 1.13E-01 |
| 169.00093 | 18.29  | 15.22 | 12.27 | 11.29 | 14.12 | 3.77E-10 | 7.91E-06 | 1.04E-09 | 2.71E-01 | 3.63E-01 | 1.82E-02 | 4.83E-05 |
| 169.00798 | 22.7   | 16.08 | 16.20 | 16.74 | 16.34 | 3.29E-08 | 7.03E-01 | 2.02E-08 | 9.69E-02 | 9.82E-06 | 6.07E-01 | 2.53E-03 |
| 169.01202 | 155.93 | 15.82 | 14.95 | 15.39 | 15.46 | 4.42E-10 | 3.46E-11 | 2.29E-03 | 2.06E-02 | 1.84E-03 | 3.75E-04 | 9.48E-01 |
| 169.02557 | 19.95  | 16.39 | 16.48 | 16.40 | 16.67 | 2.53E-01 | 9.40E-01 | 1.00E+00 | 2.52E-01 | 9.60E-01 | 5.92E-01 | 3.01E-01 |
| 169.03126 | 30.57  | 13.85 | 13.94 | 14.06 | 13.61 | 4.61E-01 | 9.88E-01 | 8.56E-01 | 8.34E-01 | 9.69E-01 | 6.72E-01 | 3.91E-01 |
| 169.04665 | 26.34  | 15.97 | 17.84 | 18.06 | 17.09 | 5.70E-68 | 5.11E-15 | 5.11E-15 | 5.33E-15 | 7.84E-02 | 1.16E-13 | 3.51E-14 |
| 169.05184 | 287.19 | 19.79 | 17.34 | 17.67 | 16.41 | 2.86E-15 | 2.53E-09 | 2.10E-07 | 4.71E-14 | 8.26E-01 | 9.26E-02 | 8.61E-03 |
| 169.06177 | 290.92 | 16.98 | 16.69 | 16.73 | 16.92 | 6.34E-02 | 9.39E-02 | 1.79E-01 | 9.59E-01 | 9.90E-01 | 3.14E-01 | 4.79E-01 |
| 169.06986 | 135.08 | 15.31 | 14.73 | 14.72 | 14.70 | 1.50E-06 | 6.70E-05 | 3.47E-05 | 3.18E-05 | 1.00E+00 | 9.92E-01 | 9.98E-01 |
| 169.07005 | 25.21  | 16.75 | 16.05 | 15.74 | 15.72 | 1.21E-12 | 1.05E-05 | 7.56E-11 | 1.46E-10 | 1.47E-01 | 1.29E-01 | 9.99E-01 |
| 169.08687 | 267.48 | 18.43 | 18.73 | 18.73 | 18.65 | 1.39E-01 | 1.83E-01 | 1.72E-01 | 4.56E-01 | 1.00E+00 | 9.62E-01 | 9.59E-01 |
| 169.12331 | 208.02 | 17.70 | 16.84 | 16.83 | 17.26 | 3.65E-10 | 1.89E-08 | 8.94E-09 | 1.29E-02 | 1.00E+00 | 2.32E-02 | 1.74E-02 |

|           |        |       |       |       |       |          |          |          |          |          |          |          |
|-----------|--------|-------|-------|-------|-------|----------|----------|----------|----------|----------|----------|----------|
| 169.98623 | 65.46  | 15.41 | 13.01 | 14.40 | 14.77 | 7.63E-18 | 4.14E-14 | 2.10E-04 | 5.42E-02 | 3.20E-07 | 2.86E-10 | 4.48E-01 |
| 169.99452 | 19.99  | 15.76 | 16.56 | 16.63 | 17.06 | 1.18E-06 | 2.77E-03 | 8.24E-04 | 4.62E-07 | 9.91E-01 | 1.71E-01 | 2.80E-01 |
| 170.04705 | 290.56 | 18.74 | 15.41 | 15.82 | 15.05 | 7.10E-33 | 7.11E-15 | 3.53E-14 | 5.11E-15 | 4.66E-01 | 6.00E-01 | 3.99E-02 |
| 170.05698 | 187.12 | 16.12 | 14.03 | 13.94 | 14.58 | 6.73E-16 | 8.46E-13 | 9.10E-14 | 2.56E-07 | 9.83E-01 | 2.05E-01 | 9.25E-02 |
| 170.05982 | 211.28 | 14.88 | 9.79  | 10.84 | 10.91 | 9.93E-14 | 5.20E-13 | 5.72E-09 | 3.47E-08 | 3.72E-01 | 3.42E-01 | 1.00E+00 |
| 170.07226 | 279.45 | 18.51 | 16.65 | 16.47 | 16.72 | 8.51E-43 | 5.11E-15 | 5.11E-15 | 5.11E-15 | 5.48E-01 | 9.56E-01 | 2.71E-01 |
| 170.08211 | 293.73 | 17.66 | 18.47 | 18.82 | 18.34 | 2.77E-22 | 1.13E-12 | 1.91E-14 | 5.51E-09 | 6.40E-03 | 6.18E-01 | 8.62E-05 |
| 170.0903  | 183.91 | 15.94 | 15.34 | 15.30 | 15.80 | 2.74E-10 | 2.78E-07 | 3.61E-08 | 5.74E-01 | 9.88E-01 | 3.13E-04 | 7.22E-05 |
| 170.83348 | 17.95  | 16.51 | 16.86 | 16.97 | 17.05 | 5.65E-03 | 1.39E-01 | 2.25E-02 | 6.01E-03 | 9.03E-01 | 6.44E-01 | 9.55E-01 |
| 170.89262 | 108.03 | 13.37 | 14.24 | 14.37 | 14.47 | 4.37E-04 | 1.28E-02 | 2.39E-03 | 1.12E-03 | 9.66E-01 | 8.66E-01 | 9.88E-01 |
| 170.90215 | 108.52 | 16.21 | 16.01 | 16.00 | 16.78 | 4.07E-07 | 4.78E-01 | 4.42E-01 | 6.06E-04 | 1.00E+00 | 2.66E-06 | 1.75E-06 |
| 170.94432 | 29.78  | 18.88 | 19.01 | 19.30 | 18.54 | 7.16E-05 | 8.43E-01 | 2.95E-02 | 1.28E-01 | 2.33E-01 | 2.04E-02 | 1.82E-05 |
| 170.95026 | 83.97  | 15.83 | 15.30 | 15.92 | 15.71 | 6.03E-09 | 6.07E-07 | 7.85E-01 | 6.34E-01 | 9.29E-09 | 3.92E-04 | 1.71E-01 |
| 170.97017 | 57.83  | 17.32 | 16.22 | 18.41 | 18.55 | 7.52E-50 | 4.66E-14 | 4.42E-14 | 4.30E-14 | 5.11E-15 | 5.11E-15 | 6.92E-01 |
| 171.00634 | 171.4  | 11.88 | 15.65 | 15.73 | 15.02 | 2.04E-21 | 4.20E-14 | 4.46E-14 | 2.84E-12 | 9.98E-01 | 4.40E-01 | 3.33E-01 |
| 171.00688 | 20.74  | 21.74 | 22.21 | 22.21 | 22.08 | 3.34E-03 | 7.55E-03 | 6.44E-03 | 9.48E-02 | 1.00E+00 | 8.52E-01 | 8.41E-01 |
| 171.02739 | 294.28 | 14.83 | 17.13 | 17.08 | 17.15 | 1.57E-18 | 7.37E-14 | 9.86E-14 | 1.10E-13 | 9.98E-01 | 1.00E+00 | 9.94E-01 |
| 171.04099 | 293.51 | 15.97 | 17.20 | 17.22 | 17.41 | 3.17E-13 | 4.53E-09 | 1.89E-09 | 2.24E-11 | 1.00E+00 | 7.18E-01 | 7.65E-01 |
| 171.04155 | 18.26  | 16.43 | 17.02 | 17.02 | 16.96 | 5.99E-21 | 4.37E-14 | 4.27E-14 | 2.67E-13 | 1.00E+00 | 7.61E-01 | 7.91E-01 |
| 171.06747 | 258.18 | 22.67 | 21.02 | 21.22 | 21.02 | 1.98E-19 | 4.26E-14 | 7.20E-13 | 4.60E-14 | 6.89E-01 | 1.00E+00 | 7.04E-01 |
| 171.07751 | 174.83 | 16.44 | 15.87 | 16.02 | 16.20 | 3.43E-04 | 2.07E-04 | 1.03E-02 | 3.02E-01 | 6.97E-01 | 1.01E-01 | 5.89E-01 |
| 171.10256 | 242.67 | 23.27 | 23.23 | 22.46 | 21.66 | 4.00E-07 | 9.99E-01 | 3.12E-02 | 1.86E-06 | 5.43E-02 | 6.60E-06 | 5.39E-02 |
| 171.13895 | 270.54 | 19.16 | 18.53 | 18.68 | 18.57 | 5.66E-09 | 4.39E-08 | 3.11E-05 | 7.73E-07 | 5.23E-01 | 9.79E-01 | 7.87E-01 |
| 171.13907 | 77.42  | 17.25 | 15.23 | 15.34 | 16.08 | 2.04E-52 | 5.11E-15 | 5.11E-15 | 3.69E-14 | 7.70E-01 | 1.06E-11 | 1.79E-09 |
| 171.83449 | 17.9   | 10.51 | 11.22 | 10.41 | 10.43 | 6.58E-02 | 1.57E-01 | 9.89E-01 | 9.94E-01 | 8.84E-02 | 1.18E-01 | 1.00E+00 |
| 171.94683 | 163.06 | 13.80 | 13.04 | 13.59 | 14.51 | 5.31E-02 | 4.19E-01 | 9.70E-01 | 5.15E-01 | 7.08E-01 | 2.88E-02 | 2.89E-01 |
| 171.96544 | 81.51  | 14.87 | 14.07 | 13.99 | 14.62 | 7.27E-06 | 3.14E-04 | 4.09E-05 | 5.97E-01 | 9.72E-01 | 3.83E-02 | 1.04E-02 |
| 172.00183 | 47.16  | 17.75 | 15.92 | 16.51 | 16.06 | 4.36E-15 | 1.55E-13 | 3.34E-07 | 1.58E-11 | 5.02E-02 | 9.40E-01 | 2.13E-01 |
| 172.01034 | 20.04  | 16.17 | 16.13 | 16.13 | 16.13 | 9.93E-01 | 9.96E-01 | 9.95E-01 | 9.96E-01 | 1.00E+00 | 1.00E+00 | 1.00E+00 |
| 172.02325 | 30.92  | 19.41 | 18.98 | 19.52 | 19.16 | 4.78E-04 | 7.32E-03 | 8.67E-01 | 2.53E-01 | 6.51E-04 | 5.77E-01 | 5.60E-02 |
| 172.04034 | 156.58 | 15.31 | 14.27 | 14.35 | 14.37 | 2.92E-15 | 7.55E-13 | 2.28E-11 | 2.67E-10 | 9.25E-01 | 8.73E-01 | 9.99E-01 |
| 172.04042 | 55.51  | 15.59 | 14.60 | 15.41 | 15.29 | 7.04E-06 | 4.00E-06 | 7.73E-01 | 4.36E-01 | 3.58E-04 | 4.62E-03 | 9.41E-01 |
| 172.0515  | 290.18 | 17.97 | 16.89 | 16.85 | 16.87 | 2.34E-24 | 4.41E-14 | 4.19E-14 | 4.26E-14 | 9.85E-01 | 9.99E-01 | 9.97E-01 |
| 172.05173 | 89.95  | 16.64 | 14.35 | 14.83 | 14.90 | 1.75E-43 | 5.11E-15 | 5.11E-15 | 5.33E-15 | 3.84E-03 | 9.30E-04 | 9.56E-01 |
| 172.06278 | 288.8  | 22.92 | 20.92 | 21.04 | 20.95 | 1.59E-76 | 5.11E-15 | 5.11E-15 | 5.11E-15 | 4.07E-01 | 9.69E-01 | 7.14E-01 |
| 172.07086 | 287.87 | 18.68 | 17.06 | 17.12 | 17.26 | 6.22E-39 | 5.11E-15 | 5.11E-15 | 6.00E-15 | 9.40E-01 | 3.32E-01 | 6.63E-01 |
| 172.08802 | 226.22 | 17.00 | 10.41 | 10.45 | 10.55 | 2.33E-39 | 5.11E-15 | 5.11E-15 | 5.11E-15 | 1.00E+00 | 9.92E-01 | 9.97E-01 |
| 172.09781 | 291.06 | 18.09 | 17.68 | 17.56 | 18.17 | 4.46E-05 | 2.39E-02 | 1.52E-03 | 9.48E-01 | 8.56E-01 | 7.54E-03 | 4.25E-04 |
| 172.10591 | 265.83 | 18.94 | 18.20 | 18.23 | 18.54 | 2.37E-16 | 8.17E-14 | 2.42E-13 | 1.13E-04 | 9.88E-01 | 1.56E-03 | 4.33E-03 |
| 172.89947 | 25.54  | 15.75 | 14.45 | 14.47 | 14.61 | 1.11E-02 | 2.34E-02 | 2.43E-02 | 7.02E-02 | 1.00E+00 | 9.88E-01 | 9.91E-01 |
| 172.94142 | 30.31  | 17.22 | 17.09 | 17.40 | 16.69 | 1.07E-03 | 8.53E-01 | 7.01E-01 | 1.38E-02 | 2.59E-01 | 1.26E-01 | 4.79E-04 |
| 172.94944 | 83.79  | 14.59 | 14.30 | 14.51 | 14.59 | 8.98E-01 | 8.99E-01 | 9.97E-01 | 1.00E+00 | 9.60E-01 | 9.17E-01 | 9.98E-01 |
| 172.95785 | 290.38 | 15.32 | 15.29 | 15.93 | 16.63 | 5.65E-05 | 1.00E+00 | 1.76E-01 | 1.83E-04 | 1.64E-01 | 2.02E-04 | 1.16E-01 |
| 172.98583 | 47.88  | 22.80 | 22.37 | 22.83 | 23.43 | 2.05E-08 | 2.88E-02 | 9.96E-01 | 4.37E-04 | 1.80E-02 | 2.12E-09 | 1.32E-03 |
| 172.98983 | 159.37 | 15.66 | 16.57 | 13.99 | 15.62 | 7.22E-05 | 3.16E-01 | 9.59E-03 | 1.00E+00 | 2.12E-05 | 3.22E-01 | 2.03E-02 |

|           |        |       |       |       |       |          |          |          |          |          |          |          |
|-----------|--------|-------|-------|-------|-------|----------|----------|----------|----------|----------|----------|----------|
| 172.99132 | 180.55 | 13.66 | 13.63 | 13.37 | 13.67 | 7.93E-01 | 1.00E+00 | 8.17E-01 | 1.00E+00 | 8.73E-01 | 9.99E-01 | 8.29E-01 |
| 173.0084  | 25.89  | 23.84 | 23.82 | 24.02 | 24.21 | 5.05E-06 | 9.95E-01 | 1.00E-01 | 3.44E-05 | 6.68E-02 | 2.17E-05 | 8.47E-02 |
| 173.02546 | 30.27  | 16.07 | 15.91 | 16.24 | 15.92 | 2.01E-02 | 5.52E-01 | 3.98E-01 | 6.22E-01 | 2.71E-02 | 1.00E+00 | 4.01E-02 |
| 173.03432 | 31.5   | 12.61 | 13.58 | 14.22 | 13.27 | 6.26E-03 | 1.50E-01 | 2.59E-03 | 4.99E-01 | 5.17E-01 | 9.17E-01 | 1.95E-01 |
| 173.04665 | 288.47 | 20.65 | 19.06 | 19.45 | 18.35 | 2.74E-16 | 2.07E-09 | 6.75E-06 | 4.35E-14 | 3.90E-01 | 2.92E-02 | 1.18E-04 |
| 173.05672 | 114.35 | 14.40 | 14.43 | 14.49 | 14.97 | 8.91E-04 | 9.98E-01 | 9.28E-01 | 1.25E-03 | 9.76E-01 | 3.32E-03 | 1.14E-02 |
| 173.05795 | 290.34 | 17.49 | 16.19 | 16.36 | 16.10 | 1.30E-11 | 4.23E-09 | 2.56E-07 | 8.50E-10 | 8.51E-01 | 9.72E-01 | 6.09E-01 |
| 173.06615 | 294.11 | 18.22 | 16.55 | 16.92 | 16.75 | 2.88E-28 | 6.66E-15 | 4.40E-14 | 4.06E-14 | 4.30E-02 | 5.33E-01 | 6.14E-01 |
| 173.0831  | 282.05 | 20.39 | 16.74 | 16.29 | 16.09 | 1.67E-35 | 1.27E-14 | 5.11E-15 | 5.11E-15 | 4.87E-01 | 2.02E-01 | 9.31E-01 |
| 173.09338 | 23.23  | 17.22 | 16.97 | 16.76 | 16.87 | 1.97E-03 | 1.65E-01 | 1.05E-03 | 3.01E-02 | 3.46E-01 | 8.82E-01 | 8.17E-01 |
| 173.10135 | 145.53 | 15.66 | 14.39 | 14.12 | 14.68 | 7.13E-14 | 1.25E-09 | 1.96E-13 | 6.42E-06 | 5.05E-01 | 4.77E-01 | 2.75E-02 |
| 173.10447 | 66.18  | 21.16 | 20.77 | 22.90 | 23.12 | 4.68E-25 | 3.15E-01 | 1.57E-12 | 7.04E-14 | 4.42E-14 | 4.40E-14 | 8.04E-01 |
| 173.10929 | 155.48 | 14.91 | 13.91 | 13.92 | 13.44 | 8.82E-09 | 6.88E-05 | 6.80E-05 | 4.98E-09 | 1.00E+00 | 1.94E-01 | 1.74E-01 |
| 173.11818 | 265.73 | 18.13 | 17.64 | 17.63 | 17.98 | 3.61E-04 | 2.68E-03 | 1.55E-03 | 7.04E-01 | 9.99E-01 | 9.80E-02 | 7.16E-02 |
| 173.12947 | 130.94 | 9.52  | 15.12 | 15.27 | 13.37 | 3.09E-27 | 2.24E-14 | 1.29E-14 | 9.65E-12 | 9.91E-01 | 5.93E-03 | 2.01E-03 |
| 173.47321 | 20.54  | 18.03 | 18.63 | 18.24 | 18.17 | 1.77E-06 | 6.01E-07 | 2.25E-01 | 5.96E-01 | 2.74E-03 | 4.87E-04 | 9.36E-01 |
| 173.83145 | 17.73  | 10.55 | 11.14 | 11.34 | 10.96 | 1.97E-01 | 4.14E-01 | 1.54E-01 | 7.26E-01 | 9.51E-01 | 9.70E-01 | 7.64E-01 |
| 173.95746 | 141.23 | 15.22 | 14.58 | 14.93 | 15.13 | 4.35E-05 | 3.09E-05 | 1.36E-01 | 9.10E-01 | 6.68E-02 | 1.15E-03 | 5.02E-01 |
| 173.98038 | 76.64  | 14.99 | 14.09 | 16.08 | 15.16 | 1.12E-13 | 4.59E-04 | 1.29E-05 | 8.85E-01 | 5.04E-14 | 5.89E-05 | 7.55E-04 |
| 173.98842 | 31.4   | 17.60 | 17.06 | 16.88 | 17.22 | 5.06E-04 | 1.19E-02 | 2.60E-04 | 1.51E-01 | 7.43E-01 | 8.18E-01 | 2.45E-01 |
| 174.0019  | 201.66 | 13.52 | 15.71 | 15.72 | 15.90 | 7.83E-11 | 5.85E-08 | 4.20E-08 | 9.78E-09 | 1.00E+00 | 9.65E-01 | 9.66E-01 |
| 174.01275 | 23.25  | 19.39 | 19.33 | 19.64 | 19.83 | 2.94E-08 | 8.62E-01 | 1.46E-02 | 4.08E-06 | 1.51E-03 | 2.09E-07 | 1.40E-01 |
| 174.01731 | 16.77  | 20.34 | 20.54 | 20.37 | 20.10 | 3.36E-03 | 2.73E-01 | 9.95E-01 | 1.44E-01 | 4.22E-01 | 1.10E-03 | 9.36E-02 |
| 174.02347 | 22.09  | 15.13 | 15.48 | 16.19 | 16.36 | 1.63E-04 | 6.39E-01 | 2.64E-03 | 5.36E-04 | 1.04E-01 | 3.22E-02 | 9.48E-01 |
| 174.03077 | 291.65 | 16.65 | 16.38 | 16.30 | 15.78 | 6.99E-04 | 5.29E-01 | 2.82E-01 | 2.09E-04 | 9.77E-01 | 2.67E-02 | 7.17E-02 |
| 174.04205 | 290.11 | 17.99 | 17.65 | 17.28 | 16.85 | 3.35E-04 | 5.80E-01 | 3.20E-02 | 1.97E-04 | 4.85E-01 | 2.07E-02 | 4.14E-01 |
| 174.05597 | 171.87 | 16.22 | 15.16 | 15.12 | 15.34 | 1.66E-16 | 3.58E-13 | 7.86E-14 | 3.33E-09 | 9.94E-01 | 5.55E-01 | 3.91E-01 |
| 174.05921 | 180.75 | 16.14 | 15.62 | 15.70 | 15.85 | 3.55E-04 | 3.63E-04 | 3.15E-03 | 1.13E-01 | 9.31E-01 | 3.38E-01 | 6.87E-01 |
| 174.06721 | 264.62 | 19.14 | 17.14 | 17.20 | 16.99 | 2.00E-39 | 5.11E-15 | 5.11E-15 | 5.11E-15 | 9.79E-01 | 7.45E-01 | 5.01E-01 |
| 174.06734 | 78.71  | 17.42 | 15.16 | 15.50 | 15.87 | 7.59E-44 | 5.11E-15 | 5.11E-15 | 1.93E-14 | 5.75E-02 | 3.97E-06 | 3.82E-02 |
| 174.07822 | 262.58 | 19.53 | 17.25 | 17.67 | 17.29 | 1.31E-31 | 5.33E-15 | 3.99E-14 | 7.55E-15 | 1.13E-01 | 9.98E-01 | 1.88E-01 |
| 174.08631 | 209.24 | 16.41 | 13.34 | 12.09 | 13.76 | 9.24E-13 | 2.53E-07 | 3.21E-13 | 2.02E-05 | 1.09E-01 | 8.77E-01 | 1.76E-02 |
| 174.10149 | 83.84  | 14.36 | 13.79 | 14.14 | 15.27 | 3.00E-07 | 9.14E-02 | 7.91E-01 | 1.48E-03 | 5.01E-01 | 1.16E-07 | 6.01E-05 |
| 174.10781 | 75.97  | 16.16 | 17.00 | 18.10 | 18.48 | 5.86E-24 | 4.86E-04 | 4.24E-14 | 3.46E-14 | 3.04E-06 | 1.01E-09 | 3.20E-01 |
| 174.12165 | 144.38 | 15.41 | 14.67 | 14.59 | 14.70 | 5.43E-08 | 6.69E-06 | 3.81E-07 | 2.91E-05 | 9.52E-01 | 9.98E-01 | 8.94E-01 |
| 174.88933 | 17.64  | 15.28 | 13.49 | 13.35 | 13.08 | 9.41E-08 | 4.91E-05 | 7.67E-06 | 7.22E-07 | 9.84E-01 | 7.52E-01 | 9.15E-01 |
| 174.90776 | 60.91  | 15.85 | 14.85 | 16.81 | 16.57 | 7.12E-17 | 2.77E-05 | 4.82E-05 | 6.34E-03 | 4.27E-14 | 3.71E-12 | 6.91E-01 |
| 174.95582 | 174.52 | 19.21 | 18.79 | 19.44 | 18.21 | 1.18E-07 | 1.61E-01 | 6.47E-01 | 1.69E-05 | 9.16E-03 | 3.73E-02 | 1.23E-07 |
| 174.98394 | 44.86  | 18.43 | 18.15 | 19.01 | 19.19 | 1.29E-11 | 2.04E-01 | 4.96E-04 | 4.82E-06 | 1.29E-07 | 5.72E-10 | 6.33E-01 |
| 174.99131 | 26.66  | 17.42 | 17.05 | 16.65 | 17.16 | 2.78E-03 | 2.66E-01 | 9.77E-04 | 5.88E-01 | 2.20E-01 | 9.59E-01 | 8.32E-02 |
| 175.02497 | 22.45  | 27.87 | 28.81 | 28.54 | 28.29 | 2.57E-19 | 4.26E-14 | 2.38E-11 | 8.83E-05 | 2.21E-02 | 1.11E-06 | 4.69E-02 |
| 175.03998 | 143.02 | 15.30 | 12.23 | 12.84 | 13.43 | 4.44E-18 | 4.26E-14 | 1.80E-12 | 2.44E-07 | 2.58E-01 | 2.69E-03 | 2.85E-01 |
| 175.05151 | 207.71 | 15.73 | 8.39  | 8.15  | 10.87 | 4.21E-36 | 5.11E-15 | 5.11E-15 | 4.64E-14 | 9.73E-01 | 1.29E-04 | 1.80E-05 |
| 175.06232 | 257.89 | 21.42 | 19.05 | 19.21 | 19.47 | 4.93E-33 | 5.11E-15 | 6.00E-15 | 3.91E-14 | 8.09E-01 | 1.16E-01 | 5.09E-01 |
| 175.0625  | 25.23  | 18.11 | 16.64 | 15.95 | 16.18 | 8.52E-39 | 3.99E-14 | 5.11E-15 | 5.11E-15 | 2.10E-05 | 1.42E-02 | 3.92E-01 |

|           |        |       |       |       |       |          |          |          |          |          |          |          |
|-----------|--------|-------|-------|-------|-------|----------|----------|----------|----------|----------|----------|----------|
| 175.07106 | 207.77 | 15.85 | 11.46 | 12.39 | 12.29 | 4.27E-18 | 4.39E-14 | 1.49E-11 | 1.92E-11 | 2.10E-01 | 3.38E-01 | 9.97E-01 |
| 175.08155 | 196.99 | 14.23 | 8.93  | 9.09  | 8.84  | 1.33E-45 | 5.11E-15 | 5.11E-15 | 5.11E-15 | 9.68E-01 | 9.95E-01 | 8.98E-01 |
| 175.0985  | 220.73 | 18.04 | 13.96 | 12.94 | 14.23 | 2.73E-22 | 5.60E-14 | 3.44E-14 | 1.53E-12 | 1.56E-01 | 9.53E-01 | 5.11E-02 |
| 175.16669 | 20.17  | 15.40 | 15.84 | 15.40 | 15.08 | 3.13E-02 | 2.54E-01 | 1.00E+00 | 5.66E-01 | 2.79E-01 | 1.53E-02 | 5.71E-01 |
| 175.98861 | 22.86  | 15.07 | 15.72 | 15.57 | 15.89 | 4.23E-06 | 2.61E-04 | 7.17E-03 | 4.24E-06 | 7.93E-01 | 7.38E-01 | 2.19E-01 |
| 175.99595 | 65     | 15.26 | 13.89 | 15.39 | 14.88 | 2.47E-07 | 3.62E-06 | 9.65E-01 | 5.08E-01 | 6.35E-07 | 2.92E-03 | 2.70E-01 |
| 176.00093 | 27.42  | 17.31 | 17.80 | 18.20 | 18.27 | 2.46E-05 | 9.48E-02 | 1.67E-04 | 8.93E-05 | 2.45E-01 | 1.57E-01 | 9.91E-01 |
| 176.00976 | 27.45  | 16.86 | 15.95 | 16.28 | 16.50 | 2.35E-06 | 7.15E-07 | 2.63E-03 | 1.56E-01 | 2.24E-01 | 1.02E-02 | 5.63E-01 |
| 176.02823 | 20.13  | 24.05 | 24.72 | 24.60 | 24.26 | 5.00E-15 | 1.60E-13 | 6.72E-10 | 5.68E-02 | 4.61E-01 | 1.60E-06 | 6.65E-04 |
| 176.03524 | 138.85 | 15.69 | 14.15 | 14.14 | 15.21 | 2.66E-22 | 4.31E-14 | 4.24E-14 | 2.40E-02 | 1.00E+00 | 1.84E-08 | 1.11E-08 |
| 176.04635 | 290.54 | 18.06 | 17.47 | 17.60 | 17.10 | 4.33E-13 | 1.91E-06 | 2.97E-04 | 1.03E-13 | 6.55E-01 | 1.20E-02 | 1.89E-04 |
| 176.05758 | 293.5  | 17.41 | 15.45 | 15.26 | 15.38 | 9.24E-15 | 1.91E-10 | 2.24E-12 | 1.19E-10 | 9.13E-01 | 9.94E-01 | 9.80E-01 |
| 176.06601 | 96.69  | 15.81 | 13.84 | 14.17 | 14.66 | 4.58E-26 | 7.99E-15 | 4.35E-14 | 6.79E-10 | 2.11E-01 | 2.68E-05 | 2.52E-02 |
| 176.0717  | 170.89 | 15.38 | 14.16 | 14.06 | 14.50 | 1.31E-04 | 8.84E-04 | 2.20E-04 | 3.63E-02 | 9.90E-01 | 7.41E-01 | 5.47E-01 |
| 176.08285 | 282.67 | 17.32 | 15.60 | 16.17 | 15.90 | 1.92E-14 | 9.97E-14 | 3.80E-07 | 1.07E-09 | 3.53E-02 | 5.14E-01 | 5.87E-01 |
| 176.09415 | 288.53 | 16.91 | 11.50 | 12.04 | 11.37 | 2.31E-24 | 4.16E-14 | 4.42E-14 | 4.06E-14 | 7.53E-01 | 9.95E-01 | 6.23E-01 |
| 176.90507 | 71.78  | 15.20 | 14.37 | 14.60 | 14.52 | 4.01E-04 | 3.82E-04 | 1.68E-02 | 7.25E-03 | 6.94E-01 | 8.99E-01 | 9.83E-01 |
| 176.91033 | 30.28  | 14.94 | 14.58 | 14.75 | 14.78 | 3.59E-01 | 2.70E-01 | 7.72E-01 | 8.58E-01 | 8.33E-01 | 7.78E-01 | 9.99E-01 |
| 176.93598 | 19.57  | 20.74 | 23.13 | 23.13 | 22.79 | 9.97E-27 | 2.86E-14 | 2.62E-14 | 4.31E-14 | 1.00E+00 | 4.37E-01 | 4.36E-01 |
| 176.97807 | 157.33 | 15.70 | 15.01 | 15.35 | 16.55 | 2.79E-14 | 4.75E-04 | 1.66E-01 | 1.50E-05 | 2.22E-01 | 6.24E-14 | 1.03E-09 |
| 176.98366 | 176.72 | 16.60 | 15.88 | 15.85 | 16.26 | 9.97E-16 | 2.22E-12 | 1.58E-13 | 2.20E-03 | 9.80E-01 | 9.49E-04 | 1.91E-04 |
| 177.00579 | 21.25  | 16.49 | 17.74 | 17.05 | 16.83 | 2.11E-02 | 1.10E-02 | 4.93E-01 | 8.43E-01 | 3.34E-01 | 1.40E-01 | 9.52E-01 |
| 177.01929 | 130.99 | 14.93 | 14.20 | 14.10 | 14.45 | 5.26E-10 | 1.51E-07 | 1.59E-09 | 1.69E-03 | 8.70E-01 | 2.29E-01 | 4.07E-02 |
| 177.02979 | 19.92  | 21.30 | 22.05 | 21.92 | 21.59 | 2.88E-18 | 4.27E-14 | 1.62E-12 | 2.20E-03 | 3.68E-01 | 1.12E-06 | 9.04E-04 |
| 177.04027 | 266.58 | 18.85 | 19.72 | 19.66 | 19.35 | 7.03E-12 | 1.23E-10 | 1.21E-09 | 5.78E-04 | 9.70E-01 | 2.48E-02 | 7.41E-02 |
| 177.05562 | 185.58 | 16.49 | 16.10 | 16.05 | 16.18 | 1.58E-03 | 8.81E-03 | 1.71E-03 | 7.05E-02 | 9.72E-01 | 9.20E-01 | 7.07E-01 |
| 177.07817 | 256.12 | 20.98 | 18.40 | 18.62 | 18.90 | 5.67E-59 | 5.11E-15 | 5.11E-15 | 5.11E-15 | 3.41E-01 | 1.23E-03 | 1.37E-01 |
| 177.0872  | 156.58 | 15.24 | 14.73 | 14.71 | 14.63 | 7.26E-06 | 5.10E-04 | 2.10E-04 | 3.18E-05 | 9.98E-01 | 8.76E-01 | 9.38E-01 |
| 177.09203 | 201.91 | 16.92 | 16.15 | 16.63 | 16.52 | 1.24E-06 | 1.97E-07 | 1.19E-01 | 2.21E-02 | 3.69E-03 | 4.57E-02 | 8.88E-01 |
| 177.16491 | 216.97 | 15.77 | 14.16 | 15.18 | 15.43 | 6.24E-06 | 2.43E-06 | 2.17E-01 | 7.00E-01 | 7.46E-03 | 7.44E-04 | 8.69E-01 |
| 178.00685 | 21.76  | 15.58 | 14.54 | 14.88 | 15.28 | 1.16E-03 | 8.00E-04 | 4.31E-02 | 6.80E-01 | 6.08E-01 | 4.99E-02 | 4.94E-01 |
| 178.01798 | 20.91  | 17.02 | 16.93 | 16.83 | 17.55 | 8.54E-05 | 9.36E-01 | 6.23E-01 | 4.82E-03 | 9.33E-01 | 9.27E-04 | 7.93E-05 |
| 178.02569 | 292.02 | 15.02 | 16.50 | 16.49 | 15.45 | 1.18E-09 | 1.54E-07 | 1.43E-07 | 3.56E-01 | 1.00E+00 | 8.01E-04 | 8.18E-04 |
| 178.03266 | 17.08  | 16.48 | 17.03 | 16.85 | 16.53 | 6.51E-11 | 1.49E-09 | 6.36E-05 | 9.47E-01 | 1.47E-01 | 1.70E-07 | 1.39E-03 |
| 178.04381 | 165.37 | 15.22 | 14.16 | 14.08 | 14.48 | 3.82E-11 | 8.32E-09 | 3.07E-10 | 1.46E-04 | 9.57E-01 | 2.72E-01 | 9.63E-02 |
| 178.05095 | 171.65 | 18.58 | 18.60 | 18.41 | 18.38 | 6.22E-02 | 9.96E-01 | 3.14E-01 | 1.90E-01 | 2.35E-01 | 1.38E-01 | 9.87E-01 |
| 178.05109 | 23.23  | 18.55 | 23.27 | 17.97 | 17.86 | 3.73E-79 | 5.11E-15 | 1.74E-02 | 4.64E-03 | 5.11E-15 | 5.11E-15 | 9.57E-01 |
| 178.06208 | 285.32 | 18.81 | 17.69 | 17.88 | 17.65 | 2.99E-34 | 5.11E-15 | 3.24E-14 | 5.11E-15 | 1.52E-01 | 9.59E-01 | 5.28E-02 |
| 178.06235 | 35.46  | 17.48 | 15.85 | 15.18 | 15.64 | 4.84E-25 | 1.31E-13 | 1.04E-14 | 4.26E-14 | 6.35E-03 | 7.49E-01 | 1.26E-01 |
| 178.07343 | 289.46 | 15.87 | 11.54 | 10.63 | 11.31 | 5.33E-39 | 5.77E-15 | 5.11E-15 | 5.33E-15 | 5.23E-02 | 9.23E-01 | 2.42E-01 |
| 178.08738 | 144.16 | 14.93 | 14.29 | 14.34 | 14.58 | 4.60E-07 | 1.62E-06 | 1.01E-05 | 2.86E-02 | 9.74E-01 | 9.85E-02 | 2.24E-01 |
| 178.09866 | 210.55 | 16.08 | 9.24  | 8.63  | 9.43  | 2.94E-43 | 5.11E-15 | 5.11E-15 | 5.11E-15 | 5.85E-01 | 9.83E-01 | 3.76E-01 |
| 178.93399 | 154.62 | 10.10 | 18.01 | 17.87 | 15.68 | 2.80E-47 | 5.11E-15 | 5.11E-15 | 1.13E-14 | 9.89E-01 | 2.08E-05 | 6.61E-05 |
| 178.94207 | 91.97  | 19.83 | 19.72 | 20.32 | 20.45 | 6.32E-10 | 7.77E-01 | 1.96E-04 | 4.14E-06 | 5.66E-06 | 9.32E-08 | 7.48E-01 |
| 178.97271 | 129.52 | 15.35 | 13.83 | 14.04 | 14.76 | 5.38E-19 | 4.39E-14 | 1.70E-13 | 2.91E-03 | 5.92E-01 | 6.81E-07 | 1.47E-04 |

|           |        |       |       |       |       |          |          |          |          |          |          |          |
|-----------|--------|-------|-------|-------|-------|----------|----------|----------|----------|----------|----------|----------|
| 178.99376 | 162.67 | 17.94 | 18.98 | 18.94 | 19.35 | 9.19E-18 | 8.18E-11 | 2.75E-10 | 4.31E-14 | 9.93E-01 | 7.56E-02 | 3.68E-02 |
| 179.00752 | 38.82  | 17.60 | 16.88 | 17.24 | 17.34 | 2.96E-04 | 7.73E-05 | 1.12E-01 | 3.89E-01 | 1.32E-01 | 3.90E-02 | 9.39E-01 |
| 179.02165 | 21.51  | 14.74 | 14.00 | 12.85 | 14.49 | 4.23E-02 | 7.05E-01 | 3.35E-02 | 9.85E-01 | 3.78E-01 | 9.07E-01 | 1.15E-01 |
| 179.03498 | 141.32 | 16.53 | 16.23 | 16.21 | 16.22 | 7.91E-03 | 3.20E-02 | 1.71E-02 | 3.08E-02 | 9.98E-01 | 1.00E+00 | 1.00E+00 |
| 179.04631 | 201.48 | 16.28 | 14.50 | 13.92 | 14.72 | 9.76E-14 | 1.74E-08 | 1.16E-13 | 1.74E-06 | 2.00E-01 | 8.89E-01 | 4.21E-02 |
| 179.05636 | 23.42  | 23.50 | 23.95 | 23.66 | 23.58 | 5.80E-03 | 3.39E-03 | 6.03E-01 | 9.18E-01 | 1.25E-01 | 4.02E-02 | 9.49E-01 |
| 179.06565 | 211.59 | 14.81 | 9.81  | 9.32  | 9.69  | 3.63E-15 | 8.69E-11 | 8.11E-13 | 9.85E-11 | 9.01E-01 | 9.99E-01 | 9.55E-01 |
| 179.0713  | 289.78 | 16.67 | 16.21 | 16.46 | 16.50 | 1.21E-02 | 4.96E-03 | 4.08E-01 | 6.50E-01 | 2.80E-01 | 1.70E-01 | 9.88E-01 |
| 179.0714  | 179.44 | 17.25 | 16.83 | 16.99 | 17.24 | 6.25E-06 | 2.99E-05 | 2.30E-02 | 1.00E+00 | 2.78E-01 | 1.34E-04 | 4.71E-02 |
| 179.09391 | 233.15 | 17.92 | 14.67 | 14.80 | 14.64 | 8.07E-07 | 1.89E-05 | 3.60E-05 | 2.71E-05 | 9.98E-01 | 1.00E+00 | 9.96E-01 |
| 179.10775 | 176.94 | 16.42 | 15.12 | 15.18 | 15.43 | 1.84E-11 | 5.47E-10 | 2.34E-09 | 5.40E-06 | 9.90E-01 | 4.15E-01 | 5.96E-01 |
| 179.1078  | 112.25 | 17.06 | 15.12 | 15.91 | 16.47 | 2.75E-19 | 4.17E-14 | 1.80E-08 | 1.30E-02 | 3.78E-04 | 7.11E-10 | 2.44E-02 |
| 179.94164 | 91.16  | 14.13 | 13.47 | 13.89 | 14.40 | 8.04E-04 | 1.56E-02 | 6.92E-01 | 6.13E-01 | 2.40E-01 | 4.32E-04 | 1.16E-01 |
| 179.94442 | 127.87 | 15.34 | 14.60 | 14.48 | 15.46 | 2.10E-09 | 1.34E-04 | 5.10E-06 | 8.84E-01 | 9.06E-01 | 1.62E-05 | 5.75E-07 |
| 180.0302  | 166.47 | 16.27 | 15.01 | 15.21 | 15.77 | 4.86E-21 | 4.09E-14 | 5.15E-14 | 6.68E-04 | 3.86E-01 | 1.35E-07 | 1.51E-04 |
| 180.04139 | 290.89 | 17.23 | 16.97 | 16.72 | 16.74 | 6.28E-05 | 1.45E-01 | 1.55E-04 | 5.12E-04 | 1.65E-01 | 2.48E-01 | 9.99E-01 |
| 180.0415  | 106.99 | 17.04 | 15.03 | 15.65 | 16.05 | 3.55E-39 | 5.11E-15 | 1.27E-14 | 4.91E-13 | 9.27E-06 | 8.50E-13 | 1.01E-02 |
| 180.05273 | 56.1   | 13.80 | 15.66 | 16.49 | 14.81 | 8.14E-09 | 8.71E-05 | 3.75E-09 | 9.34E-02 | 2.14E-01 | 2.19E-01 | 9.28E-04 |
| 180.05971 | 27.79  | 19.16 | 19.57 | 19.27 | 19.19 | 3.69E-02 | 3.57E-02 | 8.74E-01 | 9.98E-01 | 2.20E-01 | 7.90E-02 | 9.47E-01 |
| 180.06678 | 27.79  | 21.68 | 21.10 | 21.37 | 21.43 | 3.00E-08 | 3.28E-09 | 2.69E-03 | 2.86E-02 | 1.98E-02 | 3.90E-03 | 9.28E-01 |
| 180.07781 | 284.98 | 17.56 | 16.28 | 16.42 | 16.42 | 9.66E-14 | 6.43E-12 | 7.27E-10 | 2.91E-09 | 8.32E-01 | 8.40E-01 | 1.00E+00 |
| 180.07793 | 83.44  | 17.12 | 14.93 | 15.10 | 15.89 | 8.24E-34 | 5.11E-15 | 5.33E-15 | 1.13E-11 | 7.35E-01 | 2.93E-07 | 2.72E-05 |
| 180.08762 | 276.82 | 18.11 | 16.52 | 16.54 | 17.11 | 2.42E-30 | 6.00E-15 | 6.00E-15 | 7.88E-12 | 9.99E-01 | 1.54E-04 | 2.08E-04 |
| 180.10299 | 143.14 | 15.62 | 14.42 | 14.53 | 14.72 | 1.10E-16 | 4.97E-14 | 8.33E-13 | 9.29E-09 | 8.39E-01 | 1.59E-01 | 5.66E-01 |
| 180.9219  | 30.51  | 14.91 | 13.95 | 13.74 | 14.37 | 1.53E-15 | 1.44E-10 | 4.97E-14 | 8.07E-04 | 4.25E-01 | 2.09E-02 | 9.19E-05 |
| 180.92615 | 160.05 | 18.26 | 16.53 | 16.01 | 17.27 | 1.66E-43 | 5.11E-15 | 5.11E-15 | 1.83E-11 | 7.75E-04 | 1.03E-06 | 4.24E-14 |
| 180.9311  | 32.83  | 19.91 | 20.03 | 19.91 | 19.81 | 8.85E-01 | 9.65E-01 | 1.00E+00 | 9.82E-01 | 9.70E-01 | 8.49E-01 | 9.81E-01 |
| 180.94039 | 122.5  | 16.80 | 16.33 | 16.28 | 16.94 | 2.94E-05 | 1.45E-02 | 4.68E-03 | 8.14E-01 | 9.89E-01 | 1.38E-03 | 3.80E-04 |
| 180.9521  | 150.35 | 15.60 | 16.19 | 16.00 | 15.91 | 1.12E-04 | 3.82E-05 | 9.99E-03 | 8.39E-02 | 4.56E-01 | 1.68E-01 | 9.16E-01 |
| 180.97315 | 44.79  | 24.15 | 25.24 | 25.32 | 25.16 | 1.08E-38 | 5.11E-15 | 5.11E-15 | 6.22E-15 | 7.59E-01 | 7.57E-01 | 2.08E-01 |
| 180.98935 | 146.18 | 14.96 | 14.23 | 14.15 | 14.48 | 8.48E-10 | 1.25E-07 | 3.66E-09 | 1.42E-03 | 9.37E-01 | 2.33E-01 | 6.58E-02 |
| 181.00945 | 173.15 | 16.03 | 14.58 | 14.06 | 14.60 | 5.18E-15 | 9.04E-09 | 4.87E-14 | 3.52E-08 | 1.12E-01 | 1.00E+00 | 1.04E-01 |
| 181.01421 | 139    | 15.59 | 15.07 | 15.25 | 15.20 | 7.73E-05 | 4.25E-05 | 1.43E-02 | 5.07E-03 | 4.04E-01 | 6.95E-01 | 9.75E-01 |
| 181.02556 | 136.12 | 14.77 | 14.19 | 14.07 | 14.37 | 9.57E-05 | 1.81E-03 | 7.82E-05 | 6.81E-02 | 8.80E-01 | 7.10E-01 | 2.76E-01 |
| 181.02904 | 18.91  | 17.47 | 17.95 | 17.91 | 17.54 | 5.05E-10 | 7.45E-08 | 1.16E-06 | 7.94E-01 | 9.38E-01 | 2.55E-05 | 2.37E-04 |
| 181.03862 | 23.76  | 16.93 | 16.84 | 16.73 | 17.24 | 2.44E-02 | 9.53E-01 | 5.87E-01 | 2.46E-01 | 8.93E-01 | 9.82E-02 | 1.46E-02 |
| 181.05094 | 19.84  | 16.47 | 16.48 | 16.68 | 16.97 | 7.92E-05 | 1.00E+00 | 2.61E-01 | 1.49E-04 | 3.23E-01 | 3.18E-04 | 6.51E-02 |
| 181.05191 | 290.77 | 18.84 | 16.88 | 16.75 | 16.72 | 1.33E-38 | 5.11E-15 | 5.11E-15 | 5.11E-15 | 8.35E-01 | 7.23E-01 | 9.95E-01 |
| 181.0634  | 22.85  | 22.25 | 22.01 | 21.92 | 21.65 | 2.50E-03 | 4.07E-01 | 1.33E-01 | 8.69E-04 | 9.35E-01 | 1.07E-01 | 3.16E-01 |
| 181.07235 | 177.26 | 17.71 | 15.99 | 15.86 | 15.84 | 1.69E-23 | 4.37E-14 | 4.36E-14 | 4.42E-14 | 8.96E-01 | 8.65E-01 | 1.00E+00 |
| 181.08127 | 204.6  | 14.25 | 8.39  | 7.82  | 8.61  | 4.69E-44 | 5.11E-15 | 5.11E-15 | 5.11E-15 | 5.07E-01 | 9.52E-01 | 2.35E-01 |
| 181.08694 | 290.44 | 17.87 | 17.29 | 17.42 | 17.51 | 5.43E-07 | 3.72E-07 | 9.89E-05 | 4.63E-03 | 6.15E-01 | 1.84E-01 | 8.33E-01 |
| 181.12338 | 179.46 | 16.12 | 15.22 | 15.35 | 15.77 | 2.43E-11 | 2.07E-10 | 4.15E-08 | 4.22E-02 | 7.57E-01 | 4.36E-04 | 1.15E-02 |
| 181.1347  | 34.75  | 13.48 | 14.08 | 11.50 | 12.19 | 7.69E-65 | 5.90E-07 | 5.11E-15 | 1.62E-14 | 5.11E-15 | 5.11E-15 | 3.64E-08 |
| 181.15971 | 189.77 | 15.58 | 14.63 | 14.63 | 14.67 | 3.20E-22 | 4.11E-14 | 4.43E-14 | 4.34E-14 | 1.00E+00 | 9.81E-01 | 9.78E-01 |

|           |        |       |       |       |       |          |          |          |          |          |          |          |
|-----------|--------|-------|-------|-------|-------|----------|----------|----------|----------|----------|----------|----------|
| 181.96622 | 24.8   | 23.56 | 23.09 | 23.05 | 23.25 | 1.22E-04 | 7.55E-04 | 2.17E-04 | 6.17E-02 | 9.93E-01 | 5.95E-01 | 4.23E-01 |
| 181.97644 | 38.88  | 18.91 | 20.02 | 20.09 | 19.96 | 4.48E-39 | 5.11E-15 | 5.11E-15 | 5.33E-15 | 8.17E-01 | 8.96E-01 | 4.01E-01 |
| 182.00948 | 145.89 | 15.64 | 14.68 | 14.61 | 14.52 | 8.16E-12 | 2.46E-01 | 5.37E-01 | 3.55E-03 | 9.53E-01 | 3.80E-01 | 1.47E-01 |
| 182.00948 | 290.35 | 16.36 | 15.87 | 16.01 | 15.41 | 8.77E-03 | 6.16E-08 | 4.46E-09 | 7.90E-10 | 9.75E-01 | 7.94E-01 | 9.54E-01 |
| 182.01323 | 20.32  | 15.69 | 16.09 | 15.69 | 15.81 | 1.08E-01 | 1.27E-01 | 1.00E+00 | 9.26E-01 | 1.33E-01 | 4.50E-01 | 9.23E-01 |
| 182.0225  | 172.83 | 15.66 | 15.13 | 15.02 | 15.83 | 2.85E-04 | 5.64E-02 | 1.11E-02 | 8.60E-01 | 9.51E-01 | 9.19E-03 | 1.41E-03 |
| 182.04702 | 208.16 | 17.69 | 16.32 | 15.84 | 16.72 | 2.60E-10 | 2.48E-06 | 1.12E-10 | 2.34E-03 | 2.93E-01 | 4.63E-01 | 8.69E-03 |
| 182.0471  | 290.87 | 19.56 | 17.47 | 17.45 | 16.97 | 3.59E-50 | 5.11E-15 | 5.11E-15 | 5.11E-15 | 9.99E-01 | 3.85E-03 | 5.61E-03 |
| 182.05724 | 189.29 | 17.25 | 16.38 | 18.47 | 18.49 | 2.47E-03 | 5.02E-01 | 1.97E-01 | 2.15E-01 | 6.23E-03 | 8.20E-03 | 1.00E+00 |
| 182.0672  | 24.96  | 18.39 | 18.03 | 17.98 | 17.66 | 3.75E-04 | 1.23E-01 | 5.43E-02 | 9.96E-05 | 9.89E-01 | 1.32E-01 | 2.34E-01 |
| 182.07252 | 212.22 | 15.82 | 9.61  | 9.02  | 9.93  | 2.18E-39 | 5.11E-15 | 5.11E-15 | 5.33E-15 | 5.88E-01 | 9.13E-01 | 2.33E-01 |
| 182.08229 | 152.84 | 15.61 | 14.68 | 14.67 | 15.01 | 2.20E-11 | 1.17E-09 | 7.28E-10 | 2.34E-04 | 1.00E+00 | 1.12E-01 | 1.03E-01 |
| 182.09044 | 117.28 | 14.91 | 13.65 | 14.12 | 14.33 | 8.42E-15 | 4.33E-14 | 3.54E-07 | 4.30E-04 | 5.67E-03 | 4.99E-05 | 5.29E-01 |
| 182.11874 | 115.73 | 15.40 | 23.20 | 16.81 | 14.32 | 9.40E-92 | 5.11E-15 | 6.02E-07 | 3.39E-04 | 5.11E-15 | 5.11E-15 | 4.23E-14 |
| 182.91962 | 94.1   | 14.09 | 14.01 | 13.79 | 14.62 | 1.45E-03 | 9.83E-01 | 4.25E-01 | 5.27E-02 | 6.78E-01 | 2.49E-02 | 5.78E-04 |
| 182.92329 | 153.3  | 15.64 | 14.11 | 14.14 | 14.87 | 9.57E-13 | 8.44E-11 | 1.17E-10 | 3.28E-03 | 9.99E-01 | 4.90E-03 | 6.56E-03 |
| 182.93063 | 103.94 | 15.88 | 16.12 | 16.14 | 16.07 | 4.65E-01 | 5.59E-01 | 4.75E-01 | 7.30E-01 | 9.99E-01 | 9.95E-01 | 9.85E-01 |
| 182.96909 | 38.32  | 18.39 | 17.42 | 17.25 | 17.77 | 1.20E-08 | 2.50E-06 | 2.01E-08 | 7.21E-03 | 8.20E-01 | 2.85E-01 | 4.29E-02 |
| 182.97738 | 44.94  | 17.06 | 18.24 | 18.32 | 18.19 | 9.08E-40 | 5.11E-15 | 5.11E-15 | 5.11E-15 | 7.78E-01 | 9.44E-01 | 4.44E-01 |
| 182.98869 | 158.84 | 15.87 | 14.83 | 14.60 | 14.91 | 4.10E-17 | 1.69E-11 | 4.37E-14 | 1.39E-09 | 3.78E-01 | 9.46E-01 | 1.50E-01 |
| 182.99076 | 26.88  | 15.50 | 15.02 | 14.83 | 15.27 | 3.13E-05 | 4.82E-03 | 2.18E-05 | 4.17E-01 | 5.61E-01 | 3.24E-01 | 1.63E-02 |
| 183.00654 | 159.1  | 15.03 | 14.64 | 14.63 | 14.73 | 1.12E-02 | 2.19E-02 | 1.84E-02 | 1.43E-01 | 1.00E+00 | 9.14E-01 | 9.00E-01 |
| 183.01651 | 25.56  | 16.16 | 13.30 | 13.53 | 15.66 | 1.96E-16 | 1.16E-12 | 3.44E-11 | 5.33E-01 | 9.27E-01 | 2.47E-08 | 4.30E-07 |
| 183.02759 | 43.64  | 15.77 | 15.84 | 16.27 | 16.24 | 9.96E-07 | 9.18E-01 | 3.13E-05 | 2.26E-04 | 7.29E-04 | 3.41E-03 | 9.91E-01 |
| 183.03002 | 161.25 | 15.27 | 14.16 | 13.67 | 14.00 | 2.23E-16 | 1.57E-08 | 4.27E-14 | 2.60E-10 | 3.52E-02 | 8.23E-01 | 2.85E-01 |
| 183.03579 | 24.32  | 15.08 | 14.56 | 14.18 | 15.01 | 3.98E-03 | 2.31E-01 | 5.09E-03 | 9.95E-01 | 5.02E-01 | 4.04E-01 | 1.92E-02 |
| 183.04114 | 116.39 | 15.10 | 14.26 | 14.07 | 15.04 | 1.06E-13 | 1.92E-07 | 1.21E-10 | 9.82E-01 | 5.99E-01 | 4.92E-06 | 8.07E-09 |
| 183.05253 | 204.94 | 14.21 | 11.98 | 9.51  | 10.99 | 5.52E-07 | 3.43E-02 | 1.46E-07 | 9.50E-04 | 1.88E-02 | 6.66E-01 | 3.15E-01 |
| 183.06057 | 160.16 | 16.60 | 15.89 | 15.85 | 16.00 | 2.97E-10 | 3.72E-08 | 5.36E-09 | 7.51E-06 | 9.91E-01 | 8.12E-01 | 6.41E-01 |
| 183.06755 | 285.27 | 20.42 | 18.60 | 18.85 | 18.95 | 1.56E-29 | 5.77E-15 | 3.09E-14 | 4.31E-14 | 3.40E-01 | 9.90E-02 | 8.98E-01 |
| 183.06974 | 29.76  | 14.61 | 15.54 | 15.25 | 15.20 | 3.85E-05 | 1.52E-05 | 4.73E-03 | 1.71E-02 | 4.69E-01 | 3.34E-01 | 9.92E-01 |
| 183.07747 | 289.79 | 15.55 | 16.22 | 16.49 | 16.42 | 3.30E-05 | 8.51E-03 | 6.62E-05 | 4.10E-04 | 6.10E-01 | 8.01E-01 | 9.92E-01 |
| 183.07753 | 161.87 | 15.54 | 14.52 | 14.36 | 14.74 | 1.33E-12 | 2.88E-09 | 6.00E-12 | 8.60E-06 | 7.70E-01 | 5.26E-01 | 9.82E-02 |
| 183.08222 | 277.94 | 17.18 | 17.30 | 17.27 | 16.49 | 2.41E-02 | 9.73E-01 | 9.88E-01 | 8.19E-02 | 1.00E+00 | 3.39E-02 | 4.18E-02 |
| 183.10259 | 261.3  | 20.77 | 18.46 | 18.60 | 18.72 | 6.68E-32 | 5.33E-15 | 7.99E-15 | 3.11E-14 | 8.74E-01 | 5.44E-01 | 9.30E-01 |
| 183.12209 | 56.93  | 8.64  | 19.73 | 10.37 | 7.50  | 5.63E-73 | 5.11E-15 | 1.06E-03 | 7.62E-02 | 5.11E-15 | 5.11E-15 | 5.51E-08 |
| 183.139   | 210.8  | 18.07 | 17.12 | 16.96 | 17.35 | 7.79E-15 | 9.39E-11 | 8.17E-14 | 2.49E-06 | 6.49E-01 | 3.43E-01 | 2.67E-02 |
| 183.96334 | 24.93  | 21.82 | 21.28 | 21.25 | 21.47 | 1.08E-05 | 8.86E-05 | 3.04E-05 | 3.04E-02 | 9.97E-01 | 4.41E-01 | 3.24E-01 |
| 184.00191 | 52.66  | 16.55 | 15.91 | 15.57 | 15.33 | 1.58E-04 | 9.44E-02 | 2.39E-03 | 1.51E-04 | 6.34E-01 | 2.02E-01 | 8.41E-01 |
| 184.01989 | 16.91  | 13.82 | 11.65 | 11.24 | 12.54 | 1.12E-05 | 3.81E-04 | 1.23E-05 | 9.43E-02 | 8.78E-01 | 3.86E-01 | 9.39E-02 |
| 184.03816 | 289.11 | 18.91 | 18.42 | 17.74 | 19.14 | 3.25E-23 | 5.38E-04 | 4.40E-14 | 2.58E-01 | 1.23E-06 | 4.61E-07 | 3.26E-14 |
| 184.03819 | 162.75 | 19.96 | 18.70 | 18.40 | 19.51 | 5.35E-09 | 1.02E-05 | 2.48E-08 | 3.17E-01 | 6.73E-01 | 1.62E-02 | 3.16E-04 |
| 184.03852 | 20.02  | 19.62 | 19.18 | 18.97 | 19.63 | 1.42E-23 | 6.71E-10 | 4.33E-14 | 1.00E+00 | 1.18E-02 | 2.77E-09 | 4.31E-14 |
| 184.05179 | 216.76 | 15.24 | 8.05  | 8.81  | 8.81  | 4.51E-33 | 5.11E-15 | 1.02E-14 | 1.73E-14 | 5.27E-01 | 5.59E-01 | 1.00E+00 |
| 184.05965 | 29.56  | 19.05 | 18.27 | 18.66 | 18.19 | 1.78E-07 | 6.76E-06 | 5.69E-02 | 1.04E-06 | 7.24E-02 | 9.58E-01 | 2.18E-02 |

|           |        |       |       |       |       |          |          |          |          |          |          |          |
|-----------|--------|-------|-------|-------|-------|----------|----------|----------|----------|----------|----------|----------|
| 184.06279 | 291.62 | 21.36 | 19.26 | 19.50 | 19.32 | 6.54E-49 | 5.11E-15 | 5.11E-15 | 5.11E-15 | 2.25E-01 | 9.56E-01 | 5.33E-01 |
| 184.07313 | 30     | 22.13 | 22.22 | 22.18 | 21.76 | 8.45E-03 | 9.16E-01 | 9.86E-01 | 4.76E-02 | 9.91E-01 | 9.90E-03 | 2.21E-02 |
| 184.08815 | 211.77 | 15.23 | 9.76  | 9.93  | 10.09 | 7.56E-44 | 5.11E-15 | 5.11E-15 | 5.11E-15 | 9.67E-01 | 8.16E-01 | 9.72E-01 |
| 184.09791 | 176.73 | 16.37 | 15.97 | 16.17 | 16.22 | 2.67E-02 | 1.23E-02 | 3.85E-01 | 6.54E-01 | 4.55E-01 | 2.78E-01 | 9.82E-01 |
| 184.10598 | 187.6  | 16.88 | 15.49 | 15.52 | 16.02 | 2.88E-20 | 4.50E-14 | 4.29E-14 | 2.02E-07 | 9.95E-01 | 3.69E-03 | 7.16E-03 |
| 184.90861 | 90.35  | 15.09 | 15.35 | 15.45 | 15.42 | 1.11E-03 | 3.89E-02 | 1.54E-03 | 6.45E-03 | 7.71E-01 | 9.15E-01 | 9.92E-01 |
| 184.9261  | 53.04  | 19.83 | 17.62 | 20.70 | 20.49 | 7.07E-62 | 5.11E-15 | 3.16E-09 | 1.94E-05 | 5.11E-15 | 5.11E-15 | 4.56E-01 |
| 184.94995 | 174.86 | 14.65 | 14.13 | 13.92 | 14.22 | 7.56E-03 | 7.45E-02 | 3.96E-03 | 2.06E-01 | 7.77E-01 | 9.79E-01 | 5.47E-01 |
| 184.96014 | 30.58  | 15.13 | 14.15 | 14.45 | 13.97 | 4.86E-05 | 7.37E-04 | 3.30E-02 | 6.43E-05 | 6.55E-01 | 9.03E-01 | 2.68E-01 |
| 184.96669 | 29.11  | 15.80 | 15.68 | 15.42 | 15.85 | 4.75E-01 | 9.73E-01 | 5.47E-01 | 9.98E-01 | 8.23E-01 | 9.37E-01 | 4.80E-01 |
| 184.9859  | 26.11  | 19.78 | 22.51 | 22.18 | 22.14 | 7.09E-22 | 4.20E-14 | 4.40E-14 | 6.53E-14 | 6.35E-01 | 5.67E-01 | 9.99E-01 |
| 185.00387 | 24.29  | 15.06 | 16.14 | 16.25 | 16.06 | 1.96E-06 | 7.05E-05 | 7.07E-06 | 4.61E-04 | 9.68E-01 | 9.87E-01 | 8.60E-01 |
| 185.00692 | 39.09  | 15.23 | 14.83 | 15.02 | 14.96 | 5.88E-01 | 5.21E-01 | 8.89E-01 | 8.02E-01 | 9.18E-01 | 9.76E-01 | 9.97E-01 |
| 185.01242 | 74.86  | 13.57 | 13.74 | 13.89 | 14.46 | 4.69E-01 | 9.92E-01 | 9.38E-01 | 4.14E-01 | 9.92E-01 | 6.11E-01 | 7.70E-01 |
| 185.02032 | 294.33 | 14.74 | 16.31 | 16.96 | 16.96 | 1.18E-18 | 7.15E-09 | 4.37E-14 | 4.65E-14 | 5.02E-02 | 6.62E-02 | 1.00E+00 |
| 185.02249 | 22.59  | 17.19 | 17.21 | 16.52 | 17.05 | 1.18E-04 | 9.99E-01 | 3.75E-04 | 8.47E-01 | 3.37E-04 | 7.86E-01 | 1.33E-02 |
| 185.04678 | 290.12 | 18.32 | 17.09 | 16.90 | 16.64 | 3.81E-23 | 3.54E-13 | 4.44E-14 | 3.55E-14 | 6.45E-01 | 3.10E-02 | 3.55E-01 |
| 185.05683 | 145.56 | 15.68 | 14.66 | 14.53 | 15.32 | 1.14E-16 | 1.12E-11 | 6.22E-14 | 4.66E-02 | 7.86E-01 | 5.51E-05 | 6.63E-07 |
| 185.05701 | 20.1   | 17.34 | 17.66 | 17.93 | 18.43 | 7.61E-06 | 3.97E-01 | 1.95E-02 | 2.46E-06 | 5.61E-01 | 2.30E-03 | 9.07E-02 |
| 185.05788 | 290.42 | 17.45 | 16.40 | 16.47 | 16.79 | 2.69E-04 | 5.14E-04 | 1.20E-03 | 6.68E-02 | 9.94E-01 | 5.15E-01 | 6.64E-01 |
| 185.06623 | 289.34 | 16.76 | 14.82 | 14.73 | 15.22 | 1.80E-08 | 6.81E-07 | 1.48E-07 | 1.89E-04 | 9.95E-01 | 7.08E-01 | 5.54E-01 |
| 185.07065 | 290.03 | 17.23 | 16.49 | 15.95 | 16.21 | 6.27E-05 | 4.38E-02 | 3.83E-05 | 2.55E-03 | 2.31E-01 | 7.72E-01 | 8.13E-01 |
| 185.07638 | 27.77  | 25.91 | 26.10 | 26.15 | 25.72 | 2.03E-02 | 5.46E-01 | 3.48E-01 | 5.46E-01 | 9.90E-01 | 5.50E-02 | 2.30E-02 |
| 185.08302 | 289.66 | 19.97 | 17.37 | 16.27 | 17.26 | 2.13E-17 | 1.52E-09 | 4.44E-14 | 8.46E-10 | 3.23E-02 | 9.93E-01 | 7.67E-02 |
| 185.09316 | 189.33 | 15.87 | 15.70 | 15.64 | 16.17 | 1.06E-04 | 4.57E-01 | 1.73E-01 | 6.34E-02 | 9.46E-01 | 9.88E-04 | 1.03E-04 |
| 185.11177 | 198.55 | 16.45 | 15.78 | 15.94 | 15.79 | 1.28E-03 | 2.76E-03 | 3.33E-02 | 4.71E-03 | 8.52E-01 | 1.00E+00 | 8.89E-01 |
| 185.11828 | 263.42 | 19.35 | 19.01 | 19.16 | 19.03 | 8.95E-02 | 1.03E-01 | 5.74E-01 | 1.47E-01 | 7.49E-01 | 1.00E+00 | 8.20E-01 |
| 185.1185  | 24.23  | 17.70 | 17.03 | 16.53 | 17.04 | 3.36E-17 | 3.73E-07 | 4.40E-14 | 9.64E-07 | 3.37E-04 | 1.00E+00 | 4.16E-04 |
| 185.15464 | 262.5  | 18.20 | 17.47 | 17.42 | 17.66 | 1.16E-14 | 1.34E-11 | 3.62E-13 | 1.34E-06 | 9.54E-01 | 2.51E-01 | 8.48E-02 |
| 185.95907 | 26.22  | 16.44 | 15.58 | 15.49 | 15.78 | 5.26E-12 | 3.00E-09 | 4.36E-11 | 1.39E-05 | 9.15E-01 | 4.67E-01 | 1.55E-01 |
| 185.99416 | 24.34  | 15.13 | 12.42 | 11.99 | 14.71 | 1.15E-19 | 4.67E-12 | 4.24E-14 | 6.72E-01 | 6.51E-01 | 2.54E-08 | 3.01E-11 |
| 186.03565 | 20.52  | 17.77 | 17.36 | 17.23 | 17.60 | 7.10E-10 | 5.40E-06 | 1.54E-09 | 1.64E-01 | 4.49E-01 | 3.07E-02 | 1.91E-04 |
| 186.03971 | 29.51  | 19.68 | 19.40 | 19.84 | 19.56 | 1.43E-02 | 1.51E-01 | 6.52E-01 | 7.87E-01 | 8.48E-03 | 6.90E-01 | 1.86E-01 |
| 186.04213 | 291.7  | 17.86 | 16.50 | 16.35 | 16.12 | 2.37E-23 | 6.39E-14 | 4.31E-14 | 3.80E-14 | 8.22E-01 | 1.18E-01 | 4.99E-01 |
| 186.06734 | 286.22 | 16.81 | 16.04 | 16.13 | 16.23 | 1.57E-03 | 2.11E-03 | 7.95E-03 | 4.61E-02 | 9.76E-01 | 8.17E-01 | 9.63E-01 |
| 186.07175 | 61.73  | 15.70 | 13.35 | 14.37 | 14.80 | 3.16E-16 | 4.22E-14 | 9.65E-07 | 2.66E-03 | 4.49E-04 | 5.44E-07 | 3.55E-01 |
| 186.07855 | 253.58 | 22.07 | 21.30 | 21.52 | 21.45 | 2.76E-06 | 2.74E-06 | 1.24E-03 | 3.95E-04 | 4.74E-01 | 7.62E-01 | 9.75E-01 |
| 186.08258 | 29.85  | 15.29 | 14.87 | 14.77 | 14.23 | 2.66E-06 | 1.04E-01 | 2.41E-02 | 4.00E-07 | 9.51E-01 | 6.82E-03 | 3.01E-02 |
| 186.08612 | 208.01 | 16.38 | 15.72 | 15.21 | 15.90 | 2.38E-03 | 1.38E-01 | 8.06E-04 | 4.33E-01 | 3.56E-01 | 9.38E-01 | 1.30E-01 |
| 186.10014 | 36.63  | 15.26 | 15.26 | 15.31 | 14.85 | 1.44E-01 | 1.00E+00 | 9.96E-01 | 2.24E-01 | 9.96E-01 | 2.51E-01 | 1.58E-01 |
| 186.11355 | 175.12 | 18.73 | 18.06 | 18.23 | 18.36 | 2.50E-09 | 1.30E-09 | 5.85E-06 | 1.82E-03 | 3.61E-01 | 3.19E-02 | 6.37E-01 |
| 186.12163 | 201.94 | 17.40 | 16.60 | 16.46 | 17.25 | 1.84E-11 | 4.53E-07 | 2.23E-09 | 7.48E-01 | 7.95E-01 | 1.50E-04 | 2.32E-06 |
| 186.50284 | 276.36 | 19.21 | 18.86 | 19.16 | 18.54 | 1.18E-02 | 3.46E-01 | 9.95E-01 | 1.40E-02 | 5.06E-01 | 5.13E-01 | 3.25E-02 |
| 186.91831 | 38.3   | 17.94 | 16.79 | 17.38 | 16.86 | 1.53E-05 | 3.92E-05 | 1.06E-01 | 2.18E-04 | 9.84E-02 | 9.92E-01 | 2.02E-01 |
| 186.92436 | 67.16  | 16.23 | 16.21 | 17.12 | 16.84 | 2.10E-33 | 9.79E-01 | 5.77E-15 | 1.89E-13 | 5.77E-15 | 1.00E-13 | 1.23E-03 |

|           |        |       |       |       |       |          |          |          |          |          |          |          |
|-----------|--------|-------|-------|-------|-------|----------|----------|----------|----------|----------|----------|----------|
| 186.92961 | 40.61  | 18.10 | 18.43 | 18.74 | 18.32 | 3.85E-05 | 5.57E-02 | 9.38E-06 | 3.56E-01 | 1.02E-01 | 8.48E-01 | 1.32E-02 |
| 186.93907 | 42.08  | 18.57 | 19.32 | 19.47 | 19.34 | 7.01E-23 | 4.46E-14 | 3.73E-14 | 4.75E-14 | 3.15E-01 | 9.98E-01 | 4.31E-01 |
| 186.96587 | 27.75  | 14.66 | 13.80 | 12.40 | 13.27 | 8.97E-09 | 6.40E-02 | 1.85E-09 | 6.84E-04 | 5.76E-04 | 4.70E-01 | 7.93E-02 |
| 187.00175 | 22.54  | 19.19 | 20.19 | 20.23 | 19.94 | 2.23E-16 | 2.92E-13 | 7.17E-14 | 7.77E-08 | 9.93E-01 | 2.23E-01 | 1.28E-01 |
| 187.0073  | 22.54  | 16.16 | 17.87 | 15.66 | 17.46 | 1.13E-07 | 1.65E-04 | 5.94E-01 | 9.42E-03 | 9.86E-07 | 7.65E-01 | 1.53E-04 |
| 187.00963 | 189.17 | 15.08 | 14.29 | 15.08 | 13.92 | 1.85E-04 | 4.30E-02 | 1.00E+00 | 1.09E-03 | 5.23E-02 | 6.39E-01 | 1.54E-03 |
| 187.02446 | 157.06 | 13.44 | 14.75 | 15.01 | 14.83 | 7.77E-07 | 1.47E-04 | 2.57E-06 | 8.04E-05 | 8.35E-01 | 9.95E-01 | 9.41E-01 |
| 187.03834 | 18.25  | 16.41 | 16.64 | 16.71 | 16.49 | 2.57E-02 | 1.49E-01 | 2.69E-02 | 8.97E-01 | 9.14E-01 | 5.43E-01 | 1.98E-01 |
| 187.04094 | 290.81 | 14.01 | 18.55 | 17.40 | 15.11 | 5.85E-57 | 5.11E-15 | 5.11E-15 | 1.03E-05 | 3.91E-06 | 5.11E-15 | 4.22E-14 |
| 187.06228 | 285.82 | 20.01 | 18.39 | 18.68 | 18.31 | 4.70E-26 | 3.60E-14 | 4.32E-14 | 2.71E-14 | 2.49E-01 | 9.44E-01 | 8.41E-02 |
| 187.07278 | 18.57  | 16.47 | 16.48 | 16.50 | 16.86 | 8.15E-03 | 1.00E+00 | 9.95E-01 | 1.32E-02 | 9.97E-01 | 1.87E-02 | 3.10E-02 |
| 187.07349 | 294.47 | 19.88 | 17.40 | 17.72 | 17.62 | 1.26E-53 | 5.11E-15 | 5.11E-15 | 5.11E-15 | 8.20E-02 | 3.57E-01 | 9.06E-01 |
| 187.08069 | 29.32  | 19.28 | 19.27 | 19.24 | 18.75 | 2.32E-03 | 1.00E+00 | 9.92E-01 | 4.31E-03 | 9.96E-01 | 6.86E-03 | 1.24E-02 |
| 187.08173 | 290.97 | 18.80 | 17.11 | 16.93 | 17.24 | 9.77E-42 | 5.11E-15 | 5.11E-15 | 5.33E-15 | 4.64E-01 | 7.43E-01 | 7.20E-02 |
| 187.1088  | 139.04 | 15.67 | 14.09 | 14.32 | 14.51 | 1.07E-25 | 1.35E-14 | 4.37E-14 | 1.25E-13 | 3.78E-01 | 2.04E-02 | 5.17E-01 |
| 187.10901 | 19.5   | 16.72 | 16.33 | 16.32 | 16.38 | 1.98E-04 | 9.62E-04 | 7.02E-04 | 8.29E-03 | 1.00E+00 | 9.57E-01 | 9.45E-01 |
| 187.11697 | 121.66 | 14.84 | 13.88 | 14.08 | 14.37 | 2.30E-06 | 1.94E-06 | 2.06E-04 | 6.25E-02 | 7.11E-01 | 5.35E-02 | 4.12E-01 |
| 187.13395 | 238.15 | 18.71 | 17.37 | 17.18 | 17.65 | 1.55E-15 | 1.77E-11 | 6.04E-14 | 2.29E-07 | 7.35E-01 | 4.60E-01 | 6.64E-02 |
| 187.99676 | 37.72  | 16.78 | 15.65 | 15.79 | 15.54 | 2.14E-06 | 4.65E-05 | 4.66E-04 | 1.27E-05 | 9.37E-01 | 9.79E-01 | 7.66E-01 |
| 188.00151 | 27.04  | 16.36 | 14.93 | 14.72 | 15.55 | 1.41E-05 | 3.24E-04 | 1.97E-05 | 1.06E-01 | 9.31E-01 | 3.38E-01 | 1.05E-01 |
| 188.02142 | 21.84  | 17.55 | 17.24 | 17.28 | 17.61 | 6.75E-03 | 6.17E-02 | 1.16E-01 | 9.70E-01 | 9.92E-01 | 2.75E-02 | 5.44E-02 |
| 188.03537 | 27.56  | 14.35 | 12.49 | 13.59 | 14.23 | 3.56E-04 | 4.00E-04 | 3.35E-01 | 9.94E-01 | 9.18E-02 | 2.20E-03 | 5.34E-01 |
| 188.04623 | 31.36  | 17.33 | 15.04 | 15.28 | 15.15 | 4.94E-28 | 1.55E-14 | 4.04E-14 | 3.73E-14 | 6.22E-01 | 9.48E-01 | 9.23E-01 |
| 188.05767 | 288.2  | 20.24 | 18.88 | 19.17 | 18.37 | 1.80E-41 | 5.33E-15 | 4.25E-14 | 5.11E-15 | 4.65E-02 | 6.01E-05 | 9.71E-11 |
| 188.08311 | 61.61  | 15.30 | 13.93 | 14.09 | 14.91 | 3.97E-04 | 1.08E-03 | 4.76E-03 | 7.14E-01 | 9.71E-01 | 5.29E-02 | 1.38E-01 |
| 188.09319 | 20.63  | 16.71 | 16.38 | 16.49 | 16.77 | 8.10E-03 | 3.62E-02 | 2.68E-01 | 9.73E-01 | 8.09E-01 | 1.63E-02 | 1.42E-01 |
| 188.09409 | 290.9  | 20.08 | 17.95 | 18.39 | 18.37 | 1.43E-29 | 5.11E-15 | 4.29E-14 | 4.34E-14 | 4.55E-02 | 8.49E-02 | 9.98E-01 |
| 188.10089 | 176.68 | 18.81 | 18.03 | 18.48 | 18.44 | 2.19E-05 | 3.69E-06 | 1.21E-01 | 7.97E-02 | 2.28E-02 | 5.79E-02 | 9.94E-01 |
| 188.13735 | 143.21 | 15.21 | 14.24 | 14.21 | 14.15 | 1.61E-09 | 7.34E-07 | 2.08E-07 | 1.32E-07 | 9.97E-01 | 9.67E-01 | 9.92E-01 |
| 188.91547 | 32.63  | 16.51 | 15.01 | 15.30 | 15.64 | 1.44E-09 | 1.60E-09 | 1.17E-06 | 1.42E-03 | 5.81E-01 | 4.19E-02 | 4.78E-01 |
| 188.93941 | 92.2   | 18.32 | 10.32 | 11.14 | 10.93 | 1.14E-33 | 5.11E-15 | 9.10E-15 | 1.02E-14 | 5.56E-01 | 7.79E-01 | 9.88E-01 |
| 188.98084 | 61.81  | 18.20 | 18.95 | 19.82 | 19.50 | 3.46E-41 | 3.50E-12 | 5.11E-15 | 5.11E-15 | 4.97E-14 | 2.13E-06 | 1.09E-02 |
| 188.98668 | 18.94  | 19.25 | 19.91 | 19.43 | 19.38 | 1.18E-01 | 9.12E-02 | 9.11E-01 | 9.71E-01 | 3.51E-01 | 2.81E-01 | 9.97E-01 |
| 188.99991 | 41.11  | 16.49 | 14.60 | 14.35 | 15.71 | 1.16E-19 | 9.57E-14 | 4.46E-14 | 5.22E-03 | 7.02E-01 | 3.48E-05 | 1.89E-07 |
| 189.00413 | 17.13  | 20.96 | 21.00 | 20.62 | 21.27 | 1.66E-08 | 9.66E-01 | 1.97E-03 | 8.76E-03 | 5.27E-04 | 4.15E-02 | 2.15E-09 |
| 189.01707 | 43.38  | 16.62 | 20.04 | 15.88 | 15.94 | 3.78E-56 | 5.11E-15 | 2.07E-03 | 9.24E-03 | 5.11E-15 | 5.11E-15 | 9.89E-01 |
| 189.03458 | 20.86  | 15.25 | 15.56 | 14.98 | 15.79 | 5.32E-02 | 7.24E-01 | 7.92E-01 | 2.84E-01 | 2.22E-01 | 8.79E-01 | 4.55E-02 |
| 189.0408  | 17.15  | 19.67 | 19.95 | 19.88 | 20.03 | 4.20E-04 | 7.34E-03 | 5.88E-02 | 2.97E-04 | 8.85E-01 | 7.83E-01 | 3.47E-01 |
| 189.04135 | 182.42 | 17.61 | 17.33 | 17.28 | 17.06 | 4.81E-03 | 2.41E-01 | 1.06E-01 | 1.92E-03 | 9.82E-01 | 2.95E-01 | 4.93E-01 |
| 189.04181 | 289.76 | 17.75 | 16.94 | 17.61 | 17.00 | 4.93E-04 | 2.85E-03 | 9.29E-01 | 8.68E-03 | 2.35E-02 | 9.95E-01 | 5.45E-02 |
| 189.05207 | 19.34  | 15.36 | 16.64 | 16.56 | 16.58 | 1.62E-24 | 4.09E-14 | 4.42E-14 | 4.37E-14 | 9.06E-01 | 9.67E-01 | 9.97E-01 |
| 189.06702 | 53.29  | 18.21 | 19.47 | 20.61 | 19.96 | 3.27E-20 | 6.26E-07 | 3.91E-14 | 1.38E-11 | 1.12E-05 | 1.84E-01 | 3.34E-02 |
| 189.06705 | 186.2  | 15.67 | 15.30 | 14.89 | 15.88 | 1.11E-05 | 2.35E-01 | 4.50E-04 | 7.18E-01 | 1.71E-01 | 2.71E-02 | 1.41E-05 |
| 189.07802 | 249.47 | 20.68 | 18.25 | 18.37 | 18.71 | 3.54E-49 | 5.11E-15 | 5.11E-15 | 5.11E-15 | 8.47E-01 | 1.04E-02 | 8.64E-02 |
| 189.08848 | 22.61  | 16.34 | 16.05 | 15.99 | 15.95 | 5.44E-02 | 2.30E-01 | 1.08E-01 | 6.66E-02 | 9.86E-01 | 9.30E-01 | 9.92E-01 |



|           |        |       |       |       |       |          |          |          |          |          |          |          |
|-----------|--------|-------|-------|-------|-------|----------|----------|----------|----------|----------|----------|----------|
| 189.0894  | 289.08 | 16.67 | 13.64 | 13.94 | 14.15 | 3.61E-13 | 1.36E-11 | 7.56E-10 | 3.91E-08 | 8.84E-01 | 6.42E-01 | 9.65E-01 |
| 189.09647 | 193.85 | 14.96 | 15.33 | 15.21 | 14.91 | 1.06E-01 | 2.13E-01 | 5.47E-01 | 9.92E-01 | 9.27E-01 | 1.52E-01 | 4.21E-01 |
| 189.11325 | 124.56 | 16.78 | 16.30 | 16.61 | 16.34 | 1.18E-03 | 2.25E-03 | 5.54E-01 | 8.94E-03 | 1.14E-01 | 9.90E-01 | 2.40E-01 |
| 189.12455 | 70.42  | 15.09 | 14.83 | 15.22 | 14.99 | 4.93E-01 | 7.32E-01 | 9.53E-01 | 9.81E-01 | 4.28E-01 | 9.29E-01 | 8.21E-01 |
| 189.12877 | 25.53  | 16.42 | 14.29 | 15.48 | 16.99 | 2.80E-09 | 1.40E-06 | 8.03E-02 | 5.12E-01 | 2.12E-02 | 5.46E-09 | 2.01E-03 |
| 189.97593 | 81.38  | 14.22 | 13.90 | 13.37 | 13.76 | 1.90E-01 | 8.46E-01 | 1.29E-01 | 6.61E-01 | 5.47E-01 | 9.86E-01 | 7.78E-01 |
| 189.98939 | 23.88  | 17.97 | 17.21 | 17.01 | 17.64 | 1.72E-09 | 5.74E-06 | 3.93E-09 | 1.49E-01 | 5.43E-01 | 3.60E-02 | 4.33E-04 |
| 190.00776 | 20.88  | 16.38 | 16.30 | 16.06 | 16.53 | 5.10E-03 | 9.24E-01 | 5.54E-02 | 6.44E-01 | 2.47E-01 | 3.09E-01 | 2.50E-03 |
| 190.01833 | 26.28  | 17.16 | 16.40 | 16.66 | 16.99 | 2.89E-05 | 3.08E-05 | 1.09E-02 | 7.57E-01 | 4.12E-01 | 3.51E-03 | 1.95E-01 |
| 190.03674 | 17.14  | 16.75 | 18.63 | 18.59 | 18.18 | 9.77E-32 | 5.33E-15 | 5.77E-15 | 4.13E-14 | 9.94E-01 | 2.18E-02 | 4.15E-02 |
| 190.04385 | 22.97  | 16.03 | 16.68 | 16.52 | 16.54 | 3.91E-03 | 3.32E-03 | 4.27E-02 | 4.25E-02 | 8.34E-01 | 8.88E-01 | 1.00E+00 |
| 190.05097 | 160.5  | 15.84 | 14.79 | 14.71 | 14.89 | 8.05E-14 | 1.43E-10 | 4.91E-12 | 2.11E-08 | 9.63E-01 | 9.01E-01 | 6.49E-01 |
| 190.05464 | 20.93  | 19.28 | 18.48 | 18.82 | 19.01 | 7.52E-09 | 1.56E-09 | 9.77E-04 | 1.29E-01 | 2.98E-02 | 2.76E-04 | 4.56E-01 |
| 190.06214 | 289.85 | 17.55 | 16.78 | 16.88 | 16.71 | 4.99E-11 | 1.23E-08 | 8.97E-07 | 1.97E-09 | 8.26E-01 | 9.64E-01 | 5.51E-01 |
| 190.07319 | 287.18 | 19.43 | 17.01 | 16.87 | 16.64 | 1.29E-24 | 4.17E-14 | 4.11E-14 | 3.91E-14 | 9.51E-01 | 5.11E-01 | 8.18E-01 |
| 190.09876 | 210.51 | 15.59 | 10.14 | 10.75 | 10.43 | 1.63E-30 | 6.22E-15 | 2.95E-14 | 2.04E-14 | 5.46E-01 | 9.33E-01 | 8.99E-01 |
| 190.10998 | 211.81 | 15.18 | 9.22  | 9.09  | 9.48  | 1.88E-28 | 2.60E-14 | 1.64E-14 | 3.97E-14 | 9.95E-01 | 9.67E-01 | 8.97E-01 |
| 190.9551  | 40.67  | 18.29 | 18.27 | 17.53 | 18.09 | 3.62E-02 | 1.00E+00 | 4.21E-02 | 9.09E-01 | 6.11E-02 | 9.37E-01 | 2.49E-01 |
| 190.97292 | 26.17  | 16.60 | 15.75 | 16.09 | 15.71 | 9.46E-14 | 2.09E-11 | 6.72E-05 | 8.36E-12 | 2.39E-02 | 9.88E-01 | 1.09E-02 |
| 190.97898 | 81.67  | 13.73 | 12.71 | 13.89 | 13.40 | 7.28E-05 | 6.29E-04 | 9.26E-01 | 6.08E-01 | 7.63E-05 | 5.69E-02 | 2.80E-01 |
| 191.01994 | 21.68  | 25.52 | 27.31 | 27.74 | 27.49 | 6.83E-47 | 5.11E-15 | 5.11E-15 | 5.11E-15 | 6.11E-03 | 5.35E-01 | 2.46E-01 |
| 191.03505 | 139.62 | 14.81 | 14.24 | 14.03 | 14.28 | 6.04E-06 | 1.26E-03 | 2.98E-06 | 4.20E-03 | 5.33E-01 | 9.95E-01 | 4.06E-01 |
| 191.03588 | 30.22  | 15.49 | 15.34 | 15.53 | 14.90 | 7.26E-03 | 8.57E-01 | 9.95E-01 | 1.37E-02 | 7.45E-01 | 1.23E-01 | 8.19E-03 |
| 191.05626 | 19.38  | 16.58 | 16.19 | 16.26 | 16.18 | 3.24E-01 | 3.87E-01 | 5.51E-01 | 3.93E-01 | 9.93E-01 | 1.00E+00 | 9.91E-01 |
| 191.05716 | 284.38 | 18.69 | 17.71 | 17.83 | 17.55 | 4.92E-19 | 1.27E-13 | 2.68E-11 | 4.42E-14 | 7.58E-01 | 5.63E-01 | 1.07E-01 |
| 191.0673  | 19.72  | 14.80 | 14.89 | 14.67 | 14.29 | 6.39E-01 | 9.97E-01 | 9.92E-01 | 7.12E-01 | 9.65E-01 | 6.14E-01 | 8.68E-01 |
| 191.0714  | 154.04 | 15.82 | 14.37 | 14.55 | 15.00 | 2.94E-17 | 4.24E-14 | 5.14E-13 | 6.90E-06 | 6.82E-01 | 1.50E-03 | 4.21E-02 |
| 191.07544 | 148.02 | 15.96 | 14.69 | 14.60 | 15.41 | 1.29E-15 | 6.95E-12 | 1.94E-13 | 9.39E-03 | 9.52E-01 | 3.75E-04 | 3.78E-05 |
| 191.09381 | 281.65 | 18.23 | 16.51 | 16.91 | 17.09 | 1.91E-26 | 6.00E-15 | 4.13E-14 | 7.71E-13 | 2.77E-02 | 6.57E-04 | 6.12E-01 |
| 191.09395 | 90.13  | 16.48 | 14.46 | 14.95 | 15.37 | 1.57E-32 | 5.11E-15 | 3.02E-14 | 4.05E-12 | 5.41E-03 | 4.00E-08 | 2.61E-02 |
| 191.10774 | 259.41 | 17.75 | 17.50 | 17.60 | 17.68 | 2.13E-01 | 1.67E-01 | 6.21E-01 | 9.43E-01 | 8.29E-01 | 4.93E-01 | 9.34E-01 |
| 191.18058 | 231.54 | 19.85 | 18.60 | 19.44 | 19.79 | 1.84E-28 | 5.77E-15 | 3.98E-04 | 9.43E-01 | 1.56E-13 | 2.22E-14 | 6.34E-03 |
| 191.98633 | 19.87  | 15.83 | 13.23 | 13.07 | 14.75 | 3.05E-11 | 1.18E-08 | 1.05E-09 | 5.90E-02 | 9.83E-01 | 3.35E-03 | 8.34E-04 |
| 191.99496 | 26.46  | 23.67 | 23.77 | 23.84 | 23.38 | 2.25E-04 | 7.47E-01 | 3.29E-01 | 3.40E-02 | 9.12E-01 | 2.13E-03 | 1.59E-04 |
| 192.01827 | 58.04  | 15.77 | 13.15 | 13.82 | 15.83 | 6.35E-26 | 3.94E-14 | 1.92E-12 | 9.96E-01 | 5.11E-02 | 4.42E-14 | 6.15E-12 |
| 192.02332 | 20.29  | 21.38 | 23.16 | 23.85 | 23.42 | 1.52E-47 | 5.11E-15 | 5.11E-15 | 5.11E-15 | 7.97E-06 | 2.62E-01 | 1.56E-02 |
| 192.03037 | 135.14 | 14.83 | 13.35 | 12.77 | 14.35 | 1.10E-18 | 8.19E-10 | 4.46E-14 | 1.49E-01 | 4.31E-02 | 1.36E-04 | 2.58E-10 |
| 192.03049 | 17.68  | 13.44 | 9.86  | 9.95  | 11.37 | 2.40E-19 | 4.46E-14 | 4.34E-14 | 2.60E-06 | 9.95E-01 | 1.58E-03 | 3.20E-03 |
| 192.03378 | 18.45  | 16.60 | 16.63 | 16.13 | 17.32 | 2.70E-05 | 9.99E-01 | 1.43E-01 | 1.15E-02 | 1.24E-01 | 2.15E-02 | 4.87E-06 |
| 192.04147 | 291.49 | 16.18 | 16.26 | 16.38 | 15.84 | 7.20E-02 | 9.79E-01 | 7.54E-01 | 3.36E-01 | 9.40E-01 | 1.87E-01 | 5.00E-02 |
| 192.05162 | 170.67 | 17.32 | 17.02 | 16.97 | 17.47 | 5.74E-03 | 2.14E-01 | 1.06E-01 | 7.86E-01 | 9.90E-01 | 3.24E-02 | 1.26E-02 |
| 192.06662 | 285.87 | 16.74 | 16.88 | 16.73 | 16.92 | 4.70E-01 | 7.55E-01 | 1.00E+00 | 6.20E-01 | 7.21E-01 | 9.95E-01 | 5.87E-01 |
| 192.06663 | 168.63 | 18.46 | 17.20 | 17.60 | 17.72 | 1.81E-24 | 7.55E-15 | 1.03E-13 | 3.07E-10 | 1.62E-03 | 3.36E-05 | 6.93E-01 |
| 192.07792 | 286.08 | 17.49 | 16.82 | 16.91 | 16.91 | 9.45E-06 | 2.96E-05 | 3.79E-04 | 5.70E-04 | 9.21E-01 | 9.38E-01 | 1.00E+00 |
| 192.08797 | 169.93 | 17.56 | 16.55 | 16.71 | 16.77 | 3.39E-13 | 3.14E-12 | 2.62E-09 | 1.08E-07 | 6.39E-01 | 3.84E-01 | 9.69E-01 |

|           |        |       |       |       |       |          |          |          |          |          |          |          |
|-----------|--------|-------|-------|-------|-------|----------|----------|----------|----------|----------|----------|----------|
| 192.09735 | 209.15 | 14.92 | 8.84  | 9.27  | 8.77  | 2.02E-23 | 4.31E-14 | 4.34E-14 | 4.45E-14 | 9.03E-01 | 1.00E+00 | 8.63E-01 |
| 192.10299 | 184.91 | 16.08 | 15.44 | 15.37 | 15.67 | 2.07E-05 | 2.54E-04 | 3.49E-05 | 4.93E-02 | 9.75E-01 | 4.82E-01 | 2.52E-01 |
| 192.11111 | 183.35 | 16.19 | 15.97 | 16.00 | 16.10 | 2.61E-03 | 3.55E-03 | 1.31E-02 | 4.91E-01 | 9.75E-01 | 2.28E-01 | 4.33E-01 |
| 192.18392 | 227.18 | 16.48 | 15.16 | 15.88 | 16.33 | 2.74E-21 | 3.79E-14 | 1.93E-05 | 6.45E-01 | 2.71E-07 | 4.47E-14 | 4.83E-03 |
| 192.95227 | 83.89  | 15.71 | 16.01 | 16.82 | 16.86 | 1.43E-22 | 5.14E-02 | 4.32E-14 | 4.33E-14 | 1.44E-09 | 9.62E-10 | 9.91E-01 |
| 192.95793 | 93.87  | 15.43 | 14.57 | 14.95 | 15.50 | 3.39E-13 | 1.40E-10 | 5.70E-04 | 9.40E-01 | 1.34E-02 | 4.54E-11 | 1.39E-04 |
| 192.99207 | 29.93  | 18.07 | 16.47 | 16.58 | 17.03 | 8.83E-20 | 4.26E-14 | 4.31E-14 | 3.14E-08 | 9.21E-01 | 9.77E-03 | 5.31E-02 |
| 192.99942 | 25.7   | 19.43 | 19.26 | 19.11 | 18.87 | 2.03E-05 | 4.12E-01 | 1.95E-02 | 7.42E-06 | 5.45E-01 | 4.65E-03 | 1.51E-01 |
| 193.00952 | 170.03 | 15.20 | 14.40 | 14.47 | 14.46 | 1.06E-08 | 2.01E-07 | 1.99E-06 | 3.77E-06 | 9.59E-01 | 9.72E-01 | 1.00E+00 |
| 193.01385 | 21.63  | 16.37 | 16.00 | 16.12 | 16.22 | 4.41E-02 | 2.77E-02 | 2.47E-01 | 7.15E-01 | 7.82E-01 | 3.63E-01 | 8.87E-01 |
| 193.02424 | 20.2   | 18.82 | 20.58 | 21.33 | 20.90 | 1.92E-45 | 6.00E-15 | 5.11E-15 | 5.11E-15 | 3.79E-06 | 1.49E-01 | 2.36E-02 |
| 193.03547 | 163.15 | 19.64 | 20.36 | 20.25 | 20.19 | 1.94E-03 | 2.23E-03 | 1.24E-02 | 4.19E-02 | 9.50E-01 | 8.42E-01 | 9.90E-01 |
| 193.05061 | 154.29 | 16.06 | 14.50 | 14.76 | 15.08 | 2.16E-15 | 5.28E-14 | 4.55E-11 | 1.67E-06 | 5.06E-01 | 1.65E-02 | 3.51E-01 |
| 193.06197 | 184.33 | 15.96 | 15.37 | 15.32 | 15.39 | 1.12E-07 | 8.75E-06 | 1.00E-06 | 3.64E-05 | 9.79E-01 | 9.98E-01 | 9.40E-01 |
| 193.07311 | 293.14 | 17.86 | 17.08 | 17.28 | 17.02 | 4.84E-12 | 1.14E-09 | 5.70E-06 | 1.41E-10 | 3.51E-01 | 9.55E-01 | 1.45E-01 |
| 193.08225 | 126.41 | 16.29 | 15.78 | 15.99 | 16.05 | 1.20E-04 | 2.88E-05 | 3.03E-02 | 1.34E-01 | 2.32E-01 | 9.47E-02 | 9.60E-01 |
| 193.08705 | 187.17 | 17.50 | 17.15 | 17.22 | 17.33 | 1.80E-02 | 1.55E-02 | 6.42E-02 | 4.66E-01 | 9.52E-01 | 4.80E-01 | 7.89E-01 |
| 193.1096  | 210.37 | 16.31 | 12.35 | 12.56 | 13.03 | 9.02E-46 | 5.11E-15 | 5.11E-15 | 5.11E-15 | 8.33E-01 | 3.78E-02 | 2.33E-01 |
| 193.12339 | 293.27 | 17.23 | 16.84 | 16.93 | 16.83 | 8.18E-04 | 2.17E-03 | 2.77E-02 | 2.79E-03 | 8.50E-01 | 1.00E+00 | 8.51E-01 |
| 193.99079 | 31.69  | 18.71 | 18.81 | 18.89 | 18.39 | 6.68E-05 | 8.03E-01 | 2.92E-01 | 1.59E-02 | 8.39E-01 | 1.18E-03 | 3.92E-05 |
| 193.99928 | 32.74  | 16.07 | 15.96 | 16.06 | 15.57 | 1.58E-05 | 7.38E-01 | 1.00E+00 | 3.36E-05 | 8.04E-01 | 2.57E-03 | 7.46E-05 |
| 194.01299 | 290.52 | 14.98 | 7.99  | 8.19  | 8.42  | 2.42E-47 | 5.11E-15 | 5.11E-15 | 5.11E-15 | 9.70E-01 | 7.84E-01 | 9.57E-01 |
| 194.01304 | 17.17  | 10.80 | 15.46 | 13.54 | 15.17 | 2.56E-09 | 1.56E-08 | 1.58E-03 | 2.43E-07 | 6.26E-02 | 9.85E-01 | 1.62E-01 |
| 194.02738 | 18.88  | 14.31 | 15.89 | 16.38 | 16.10 | 2.20E-27 | 4.37E-14 | 7.33E-15 | 4.20E-14 | 2.92E-02 | 6.63E-01 | 4.00E-01 |
| 194.03399 | 74.21  | 15.74 | 17.10 | 17.78 | 18.09 | 1.44E-29 | 9.41E-12 | 1.87E-14 | 5.33E-15 | 1.90E-03 | 3.89E-06 | 3.73E-01 |
| 194.03879 | 126.63 | 14.98 | 14.40 | 14.14 | 14.41 | 3.43E-07 | 4.87E-04 | 1.27E-07 | 1.06E-03 | 3.17E-01 | 1.00E+00 | 2.87E-01 |
| 194.04595 | 138.5  | 15.99 | 14.50 | 13.95 | 15.33 | 3.45E-29 | 4.36E-14 | 5.11E-15 | 3.45E-04 | 5.15E-03 | 9.27E-06 | 1.33E-13 |
| 194.05715 | 290.7  | 16.55 | 16.34 | 16.20 | 16.12 | 1.39E-01 | 6.78E-01 | 2.48E-01 | 1.34E-01 | 8.93E-01 | 7.18E-01 | 9.83E-01 |
| 194.05736 | 83     | 17.21 | 14.85 | 14.83 | 15.21 | 1.93E-35 | 5.11E-15 | 5.11E-15 | 2.86E-14 | 9.99E-01 | 2.22E-01 | 1.58E-01 |
| 194.08229 | 148.69 | 16.50 | 16.59 | 16.22 | 16.62 | 1.16E-01 | 9.58E-01 | 3.74E-01 | 9.12E-01 | 1.69E-01 | 9.98E-01 | 1.34E-01 |
| 194.10359 | 48.79  | 23.21 | 22.83 | 23.70 | 23.85 | 1.11E-19 | 1.27E-03 | 1.63E-05 | 2.51E-08 | 9.06E-14 | 4.54E-14 | 4.72E-01 |
| 194.90591 | 146.93 | 20.74 | 18.68 | 18.69 | 19.31 | 1.26E-21 | 4.31E-14 | 4.41E-14 | 1.37E-09 | 1.00E+00 | 2.71E-02 | 2.87E-02 |
| 194.93722 | 17.43  | 19.86 | 22.61 | 22.39 | 21.99 | 7.39E-32 | 5.11E-15 | 7.33E-15 | 4.42E-14 | 7.32E-01 | 3.05E-02 | 2.81E-01 |
| 194.94678 | 19.82  | 21.44 | 23.98 | 23.94 | 23.62 | 3.67E-28 | 1.62E-14 | 1.80E-14 | 4.29E-14 | 9.99E-01 | 4.32E-01 | 5.15E-01 |
| 194.96775 | 173.37 | 12.52 | 15.71 | 12.92 | 13.56 | 6.86E-04 | 5.55E-04 | 9.59E-01 | 5.84E-01 | 4.33E-03 | 5.79E-02 | 8.68E-01 |
| 194.98166 | 39.83  | 15.01 | 12.75 | 15.29 | 14.88 | 1.72E-09 | 2.24E-07 | 8.87E-01 | 9.90E-01 | 9.89E-09 | 4.16E-06 | 7.57E-01 |
| 194.98881 | 46.15  | 21.26 | 21.34 | 21.44 | 21.45 | 3.25E-01 | 8.97E-01 | 3.98E-01 | 3.83E-01 | 8.36E-01 | 8.11E-01 | 1.00E+00 |
| 195.02992 | 141.46 | 14.82 | 14.10 | 13.90 | 14.10 | 1.18E-06 | 3.11E-04 | 1.33E-06 | 3.99E-04 | 6.56E-01 | 1.00E+00 | 6.99E-01 |
| 195.03367 | 21.42  | 14.55 | 16.15 | 12.77 | 13.49 | 6.56E-16 | 1.21E-04 | 1.33E-05 | 2.84E-02 | 4.40E-14 | 4.44E-10 | 2.50E-01 |
| 195.04122 | 142.2  | 14.68 | 14.12 | 13.89 | 14.24 | 1.12E-07 | 1.69E-04 | 3.37E-08 | 6.36E-03 | 3.23E-01 | 8.32E-01 | 6.00E-02 |
| 195.05136 | 20.76  | 21.19 | 21.55 | 21.45 | 21.83 | 1.15E-08 | 1.16E-03 | 3.16E-02 | 1.59E-09 | 7.37E-01 | 2.37E-02 | 7.81E-04 |
| 195.06061 | 176.93 | 15.53 | 15.57 | 15.59 | 15.40 | 4.16E-01 | 9.82E-01 | 9.47E-01 | 7.06E-01 | 9.98E-01 | 5.02E-01 | 3.96E-01 |
| 195.06754 | 288.71 | 18.40 | 16.61 | 16.54 | 16.84 | 6.33E-37 | 5.11E-15 | 5.11E-15 | 1.62E-14 | 9.67E-01 | 3.65E-01 | 1.59E-01 |
| 195.07757 | 177.57 | 15.23 | 15.06 | 14.70 | 15.08 | 1.87E-04 | 4.92E-01 | 6.93E-05 | 6.17E-01 | 1.74E-02 | 9.99E-01 | 1.34E-02 |
| 195.08681 | 80.72  | 14.00 | 14.60 | 15.38 | 16.16 | 1.19E-13 | 9.70E-02 | 1.09E-06 | 1.94E-13 | 1.78E-02 | 1.81E-07 | 2.08E-02 |

|           |        |       |       |       |       |          |          |          |          |          |          |          |
|-----------|--------|-------|-------|-------|-------|----------|----------|----------|----------|----------|----------|----------|
| 195.10266 | 285.32 | 17.58 | 17.25 | 17.32 | 17.41 | 1.16E-03 | 8.11E-04 | 1.31E-02 | 2.31E-01 | 8.43E-01 | 2.65E-01 | 7.28E-01 |
| 195.10691 | 49.25  | 19.08 | 18.13 | 19.52 | 19.69 | 1.02E-27 | 3.25E-12 | 1.58E-03 | 1.11E-05 | 2.51E-14 | 7.33E-15 | 5.60E-01 |
| 195.13902 | 294.82 | 17.47 | 17.23 | 17.19 | 17.28 | 8.85E-02 | 1.68E-01 | 8.68E-02 | 4.05E-01 | 9.93E-01 | 9.71E-01 | 8.92E-01 |
| 195.90586 | 133.27 | 17.72 | 14.82 | 14.77 | 15.54 | 1.82E-40 | 5.11E-15 | 5.11E-15 | 3.31E-14 | 9.94E-01 | 3.05E-03 | 1.13E-03 |
| 195.99221 | 35.06  | 16.15 | 16.26 | 16.58 | 16.67 | 1.79E-02 | 9.38E-01 | 8.82E-02 | 3.28E-02 | 3.15E-01 | 1.49E-01 | 9.68E-01 |
| 196.00207 | 19.2   | 14.04 | 15.64 | 14.06 | 15.78 | 1.69E-05 | 2.04E-03 | 1.00E+00 | 9.15E-04 | 3.04E-03 | 9.90E-01 | 1.39E-03 |
| 196.02312 | 32.32  | 16.54 | 15.37 | 15.91 | 15.62 | 2.08E-06 | 1.35E-06 | 2.03E-02 | 3.10E-04 | 7.87E-02 | 7.16E-01 | 5.75E-01 |
| 196.02503 | 290.98 | 11.42 | 11.40 | 14.07 | 17.40 | 6.83E-29 | 1.00E+00 | 4.71E-07 | 7.11E-15 | 9.21E-07 | 9.77E-15 | 1.64E-09 |
| 196.0289  | 20.55  | 16.47 | 16.54 | 16.40 | 16.51 | 4.56E-01 | 8.45E-01 | 8.70E-01 | 9.67E-01 | 4.12E-01 | 9.88E-01 | 6.42E-01 |
| 196.03743 | 186.35 | 14.80 | 10.74 | 9.94  | 12.52 | 3.15E-20 | 8.44E-14 | 4.39E-14 | 4.65E-05 | 3.76E-01 | 3.31E-03 | 4.73E-06 |
| 196.04027 | 36.05  | 16.47 | 16.36 | 16.43 | 16.14 | 8.85E-02 | 8.48E-01 | 9.89E-01 | 7.27E-02 | 9.62E-01 | 3.80E-01 | 1.60E-01 |
| 196.04636 | 137    | 16.07 | 15.72 | 14.93 | 16.32 | 5.19E-27 | 8.34E-03 | 3.71E-14 | 1.29E-01 | 1.16E-10 | 3.12E-06 | 6.88E-15 |
| 196.05486 | 20.5   | 16.49 | 16.65 | 16.60 | 16.99 | 1.06E-04 | 4.48E-01 | 7.33E-01 | 4.40E-05 | 9.68E-01 | 1.34E-02 | 2.85E-03 |
| 196.0628  | 293.39 | 20.63 | 18.18 | 18.55 | 18.29 | 7.02E-53 | 5.11E-15 | 5.11E-15 | 5.11E-15 | 3.46E-02 | 8.48E-01 | 2.57E-01 |
| 196.0728  | 288.62 | 18.24 | 17.43 | 16.40 | 14.02 | 1.20E-13 | 3.56E-01 | 1.24E-03 | 1.07E-13 | 1.77E-01 | 2.86E-09 | 4.47E-05 |
| 196.07449 | 19.92  | 20.26 | 19.94 | 20.36 | 20.48 | 1.93E-07 | 2.28E-03 | 6.41E-01 | 6.82E-02 | 3.20E-05 | 1.35E-07 | 5.62E-01 |
| 196.09798 | 160.41 | 15.33 | 14.54 | 14.46 | 14.80 | 9.54E-12 | 4.41E-09 | 6.23E-11 | 2.55E-04 | 9.11E-01 | 1.73E-01 | 3.60E-02 |
| 196.10615 | 158.84 | 14.82 | 13.47 | 12.15 | 12.31 | 6.01E-16 | 2.13E-04 | 6.84E-14 | 3.65E-12 | 3.68E-04 | 3.71E-03 | 9.60E-01 |
| 196.1076  | 60.28  | 14.91 | 12.38 | 14.71 | 14.87 | 1.11E-16 | 7.05E-14 | 9.07E-01 | 9.99E-01 | 4.52E-12 | 1.10E-12 | 9.62E-01 |
| 196.13441 | 139.2  | 14.73 | 13.72 | 13.91 | 14.29 | 1.45E-08 | 2.28E-08 | 6.82E-06 | 4.98E-02 | 6.53E-01 | 6.15E-03 | 1.27E-01 |
| 196.90055 | 116.48 | 17.87 | 16.48 | 16.54 | 17.50 | 7.61E-11 | 1.24E-08 | 4.62E-08 | 3.79E-01 | 9.91E-01 | 1.13E-04 | 3.14E-04 |
| 196.91056 | 292.36 | 17.64 | 17.39 | 17.34 | 17.49 | 1.50E-01 | 2.89E-01 | 1.32E-01 | 7.28E-01 | 9.81E-01 | 9.07E-01 | 7.21E-01 |
| 196.92554 | 97.09  | 15.13 | 15.57 | 15.67 | 15.34 | 3.60E-01 | 5.41E-01 | 3.45E-01 | 9.26E-01 | 9.90E-01 | 9.10E-01 | 7.67E-01 |
| 196.93293 | 17.69  | 15.82 | 17.43 | 17.21 | 17.01 | 3.53E-25 | 1.78E-14 | 4.26E-14 | 1.51E-13 | 4.17E-01 | 2.91E-02 | 5.55E-01 |
| 196.9414  | 18.3   | 14.24 | 15.57 | 15.87 | 15.60 | 1.30E-12 | 3.31E-08 | 9.71E-12 | 3.82E-08 | 5.47E-01 | 9.99E-01 | 6.47E-01 |
| 196.94713 | 44.97  | 23.72 | 24.16 | 24.67 | 24.50 | 2.90E-36 | 2.77E-10 | 5.11E-15 | 9.55E-15 | 1.15E-12 | 9.81E-06 | 3.85E-02 |
| 196.95118 | 16.72  | 15.55 | 16.87 | 16.79 | 16.58 | 2.13E-11 | 5.71E-10 | 3.69E-09 | 3.26E-06 | 9.81E-01 | 4.83E-01 | 7.10E-01 |
| 196.96598 | 92.71  | 14.03 | 14.01 | 14.01 | 14.44 | 3.76E-01 | 1.00E+00 | 1.00E+00 | 4.60E-01 | 1.00E+00 | 4.57E-01 | 4.32E-01 |
| 196.99552 | 32.39  | 16.06 | 16.36 | 15.98 | 15.88 | 3.65E-02 | 2.64E-01 | 9.55E-01 | 6.97E-01 | 1.03E-01 | 2.91E-02 | 9.39E-01 |
| 197.00439 | 148.26 | 16.51 | 17.04 | 17.42 | 17.85 | 7.89E-16 | 1.65E-03 | 8.48E-09 | 4.29E-14 | 5.82E-02 | 1.54E-06 | 2.16E-02 |
| 197.02232 | 167.99 | 15.25 | 14.80 | 14.56 | 15.23 | 1.68E-06 | 1.00E-02 | 1.29E-05 | 1.00E+00 | 3.60E-01 | 2.25E-02 | 6.45E-05 |
| 197.02257 | 19.64  | 16.69 | 16.91 | 16.81 | 16.82 | 3.67E-01 | 2.85E-01 | 7.52E-01 | 7.27E-01 | 8.63E-01 | 9.05E-01 | 1.00E+00 |
| 197.0459  | 171.4  | 15.78 | 14.89 | 14.46 | 14.85 | 5.04E-11 | 9.43E-06 | 1.85E-11 | 6.84E-06 | 9.30E-02 | 9.98E-01 | 1.60E-01 |
| 197.04694 | 290.99 | 16.39 | 15.51 | 14.69 | 14.04 | 3.06E-08 | 9.38E-02 | 4.84E-05 | 2.96E-08 | 1.41E-01 | 1.47E-03 | 3.53E-01 |
| 197.05696 | 149.68 | 15.36 | 14.24 | 14.16 | 14.89 | 6.30E-13 | 7.87E-10 | 3.25E-11 | 3.22E-02 | 9.66E-01 | 1.44E-03 | 2.20E-04 |
| 197.05802 | 290.83 | 18.35 | 16.77 | 16.90 | 16.98 | 5.59E-24 | 3.90E-14 | 4.44E-14 | 4.44E-14 | 8.52E-01 | 5.82E-01 | 9.60E-01 |
| 197.06103 | 85.55  | 13.18 | 13.33 | 13.53 | 13.69 | 3.59E-01 | 9.53E-01 | 6.30E-01 | 3.28E-01 | 9.17E-01 | 6.57E-01 | 9.51E-01 |
| 197.06741 | 27.72  | 14.94 | 15.20 | 15.15 | 14.77 | 3.80E-01 | 7.61E-01 | 8.51E-01 | 9.15E-01 | 9.98E-01 | 4.02E-01 | 4.99E-01 |
| 197.07833 | 23.15  | 16.18 | 15.94 | 15.96 | 16.05 | 5.96E-01 | 6.06E-01 | 6.65E-01 | 9.11E-01 | 1.00E+00 | 9.53E-01 | 9.73E-01 |
| 197.08313 | 285.57 | 18.53 | 17.04 | 16.80 | 16.90 | 1.44E-24 | 4.33E-14 | 3.42E-14 | 4.50E-14 | 4.51E-01 | 8.45E-01 | 9.27E-01 |
| 197.09324 | 148.01 | 14.66 | 14.29 | 14.02 | 14.33 | 1.26E-04 | 4.06E-02 | 2.80E-05 | 9.28E-02 | 2.14E-01 | 9.94E-01 | 1.40E-01 |
| 197.09355 | 20.4   | 13.61 | 16.45 | 10.77 | 11.64 | 1.51E-60 | 1.58E-14 | 1.27E-14 | 1.81E-12 | 5.11E-15 | 5.11E-15 | 4.97E-03 |
| 197.09713 | 192.5  | 16.10 | 15.29 | 15.16 | 15.54 | 4.13E-06 | 1.33E-04 | 5.07E-06 | 2.23E-02 | 9.05E-01 | 5.65E-01 | 2.02E-01 |
| 197.1183  | 273.64 | 19.08 | 18.30 | 18.40 | 18.31 | 3.91E-14 | 1.22E-11 | 2.38E-09 | 5.53E-11 | 7.80E-01 | 1.00E+00 | 8.25E-01 |
| 197.12981 | 23.66  | 9.98  | 15.97 | 8.89  | 9.68  | 1.13E-88 | 5.11E-15 | 8.36E-06 | 5.73E-01 | 5.11E-15 | 5.11E-15 | 3.91E-03 |

|           |        |       |       |       |       |           |          |          |          |          |          |          |
|-----------|--------|-------|-------|-------|-------|-----------|----------|----------|----------|----------|----------|----------|
| 197.15472 | 184.6  | 17.75 | 16.58 | 16.39 | 16.86 | 1.47E-13  | 7.25E-10 | 6.38E-13 | 7.57E-06 | 6.98E-01 | 4.01E-01 | 4.39E-02 |
| 197.94025 | 26.98  | 20.84 | 18.41 | 18.88 | 19.03 | 4.03E-10  | 8.50E-10 | 7.39E-07 | 1.26E-05 | 5.69E-01 | 3.55E-01 | 9.78E-01 |
| 197.95051 | 45.37  | 18.19 | 18.71 | 19.32 | 19.12 | 1.63E-41  | 1.01E-11 | 5.11E-15 | 5.11E-15 | 4.46E-14 | 3.01E-07 | 2.35E-02 |
| 197.97074 | 25.89  | 18.00 | 19.83 | 19.97 | 19.46 | 6.06E-45  | 5.11E-15 | 5.11E-15 | 7.55E-15 | 6.20E-01 | 1.79E-02 | 2.58E-04 |
| 198.04186 | 292.03 | 17.21 | 16.89 | 16.88 | 17.09 | 5.42E-02  | 9.95E-02 | 8.40E-02 | 8.25E-01 | 1.00E+00 | 5.33E-01 | 4.95E-01 |
| 198.05216 | 168.13 | 18.34 | 18.39 | 18.54 | 18.49 | 7.56E-01  | 9.94E-01 | 7.51E-01 | 8.86E-01 | 8.90E-01 | 9.67E-01 | 9.96E-01 |
| 198.0675  | 212    | 14.59 | 7.80  | 8.04  | 8.26  | 9.67E-28  | 2.20E-14 | 3.00E-14 | 4.04E-14 | 9.78E-01 | 8.86E-01 | 9.86E-01 |
| 198.0737  | 27.07  | 20.94 | 20.19 | 20.45 | 20.38 | 6.59E-08  | 3.52E-08 | 4.79E-04 | 9.71E-05 | 1.75E-01 | 4.64E-01 | 9.54E-01 |
| 198.07838 | 258.2  | 21.62 | 20.36 | 20.58 | 20.35 | 1.66E-16  | 1.61E-13 | 4.19E-10 | 3.70E-13 | 5.12E-01 | 1.00E+00 | 5.04E-01 |
| 198.08851 | 179.8  | 15.31 | 14.18 | 14.03 | 14.30 | 4.59E-07  | 3.17E-05 | 1.22E-06 | 3.68E-04 | 9.20E-01 | 9.69E-01 | 7.01E-01 |
| 198.11364 | 190.59 | 16.40 | 16.14 | 15.98 | 16.08 | 4.82E-03  | 1.42E-01 | 2.80E-03 | 4.98E-02 | 5.46E-01 | 9.62E-01 | 8.53E-01 |
| 198.12165 | 189.96 | 16.55 | 15.69 | 15.59 | 15.92 | 2.09E-09  | 3.35E-07 | 6.99E-09 | 4.00E-04 | 9.12E-01 | 5.10E-01 | 1.76E-01 |
| 198.89245 | 151.03 | 14.78 | 11.85 | 10.27 | 14.01 | 4.77E-27  | 2.17E-12 | 7.33E-15 | 1.95E-01 | 3.53E-04 | 1.01E-06 | 4.35E-14 |
| 198.89737 | 106.7  | 17.40 | 15.75 | 15.60 | 16.32 | 1.96E-22  | 4.45E-14 | 3.77E-14 | 2.80E-08 | 8.19E-01 | 1.17E-02 | 5.47E-04 |
| 198.90539 | 96.84  | 15.68 | 16.27 | 16.29 | 16.03 | 5.42E-11  | 3.96E-09 | 1.13E-09 | 1.52E-03 | 9.99E-01 | 5.94E-02 | 3.76E-02 |
| 198.91822 | 23.08  | 17.25 | 18.57 | 18.77 | 18.72 | 7.54E-24  | 4.31E-14 | 4.02E-14 | 4.14E-14 | 5.33E-01 | 7.75E-01 | 9.85E-01 |
| 198.94457 | 57.48  | 19.62 | 20.08 | 20.53 | 20.40 | 2.20E-38  | 1.25E-12 | 5.11E-15 | 5.11E-15 | 1.76E-11 | 5.57E-06 | 1.49E-01 |
| 198.95131 | 51.62  | 16.29 | 16.68 | 17.18 | 17.03 | 6.35E-33  | 2.70E-08 | 5.11E-15 | 2.22E-14 | 8.07E-12 | 4.33E-06 | 1.28E-01 |
| 199.00163 | 25.43  | 17.32 | 17.37 | 17.72 | 18.15 | 2.28E-03  | 9.95E-01 | 2.76E-01 | 2.76E-03 | 4.35E-01 | 8.32E-03 | 2.93E-01 |
| 199.00742 | 22.13  | 10.61 | 12.00 | 11.79 | 11.84 | 1.76E-01  | 1.97E-01 | 3.26E-01 | 3.24E-01 | 9.91E-01 | 9.96E-01 | 1.00E+00 |
| 199.02221 | 25.52  | 14.77 | 14.43 | 14.38 | 14.47 | 4.79E-01  | 6.07E-01 | 4.75E-01 | 7.11E-01 | 9.98E-01 | 9.99E-01 | 9.89E-01 |
| 199.03387 | 32.4   | 17.05 | 16.52 | 16.88 | 16.80 | 5.00E-04  | 1.62E-04 | 5.35E-01 | 1.96E-01 | 2.19E-02 | 1.48E-01 | 9.06E-01 |
| 199.03813 | 21.49  | 18.69 | 21.12 | 20.72 | 20.97 | 8.28E-19  | 4.35E-14 | 3.50E-12 | 1.03E-13 | 4.64E-01 | 9.54E-01 | 8.05E-01 |
| 199.05318 | 32.36  | 15.22 | 14.86 | 14.43 | 14.55 | 7.18E-02  | 6.86E-01 | 6.71E-02 | 1.78E-01 | 5.53E-01 | 7.88E-01 | 9.86E-01 |
| 199.06241 | 289.27 | 18.48 | 17.18 | 17.33 | 17.17 | 7.11E-29  | 1.42E-14 | 4.24E-14 | 2.02E-14 | 5.36E-01 | 1.00E+00 | 5.23E-01 |
| 199.07115 | 44.93  | 15.34 | 16.48 | 16.83 | 16.78 | 7.01E-05  | 8.11E-03 | 1.82E-04 | 5.72E-04 | 7.62E-01 | 8.50E-01 | 9.99E-01 |
| 199.07365 | 290.47 | 20.21 | 18.00 | 18.22 | 18.17 | 1.21E-66  | 5.11E-15 | 5.11E-15 | 5.11E-15 | 1.25E-01 | 3.67E-01 | 9.56E-01 |
| 199.07835 | 32.59  | 16.40 | 14.91 | 15.15 | 14.81 | 3.65E-15  | 4.82E-12 | 5.03E-09 | 9.35E-13 | 6.10E-01 | 9.69E-01 | 3.51E-01 |
| 199.08183 | 290.3  | 18.11 | 16.31 | 16.33 | 16.63 | 5.18E-32  | 5.33E-15 | 5.77E-15 | 4.33E-14 | 9.98E-01 | 1.50E-01 | 1.99E-01 |
| 199.09766 | 273.51 | 18.05 | 17.50 | 17.63 | 17.72 | 2.60E-03  | 1.56E-03 | 2.69E-02 | 1.44E-01 | 8.11E-01 | 4.85E-01 | 9.41E-01 |
| 199.10886 | 151.88 | 15.06 | 14.96 | 14.63 | 15.39 | 8.81E-06  | 9.00E-01 | 1.03E-02 | 8.60E-02 | 8.55E-02 | 1.78E-02 | 1.68E-06 |
| 199.13396 | 112.92 | 20.53 | 16.85 | 18.33 | 19.86 | 3.96E-12  | 8.63E-12 | 5.34E-05 | 5.39E-01 | 1.83E-02 | 1.24E-07 | 1.63E-02 |
| 199.134   | 259.52 | 19.41 | 18.16 | 18.32 | 18.72 | 1.09E-12  | 6.69E-12 | 1.40E-09 | 3.99E-04 | 7.77E-01 | 8.10E-03 | 9.78E-02 |
| 199.14559 | 18.65  | 5.89  | 19.99 | 5.71  | 5.44  | 3.67E-137 | 5.11E-15 | 9.06E-01 | 3.93E-01 | 5.11E-15 | 5.11E-15 | 8.01E-01 |
| 199.17036 | 247.21 | 19.90 | 18.65 | 18.77 | 18.86 | 1.32E-19  | 4.37E-14 | 5.13E-14 | 4.90E-12 | 8.24E-01 | 4.29E-01 | 9.02E-01 |
| 199.93743 | 26.86  | 19.04 | 16.94 | 17.01 | 17.10 | 6.56E-09  | 2.51E-07 | 4.94E-07 | 3.99E-06 | 9.98E-01 | 9.77E-01 | 9.96E-01 |
| 199.9685  | 24.25  | 16.21 | 17.98 | 18.20 | 18.23 | 8.35E-40  | 5.33E-15 | 5.11E-15 | 5.11E-15 | 3.92E-01 | 3.05E-01 | 9.96E-01 |
| 200.01793 | 26.36  | 16.64 | 16.89 | 17.24 | 16.58 | 9.19E-04  | 4.62E-01 | 2.85E-03 | 9.87E-01 | 1.95E-01 | 3.18E-01 | 1.71E-03 |
| 200.03325 | 51.26  | 17.34 | 15.21 | 15.70 | 15.51 | 2.36E-21  | 4.23E-14 | 5.68E-13 | 5.47E-14 | 1.01E-01 | 5.19E-01 | 8.25E-01 |
| 200.04146 | 20.28  | 14.49 | 15.95 | 15.05 | 15.89 | 2.51E-04  | 7.90E-04 | 4.34E-01 | 1.90E-03 | 9.26E-02 | 9.99E-01 | 1.43E-01 |
| 200.05764 | 288.9  | 19.70 | 18.25 | 18.41 | 17.84 | 1.75E-50  | 5.11E-15 | 5.11E-15 | 5.11E-15 | 3.78E-01 | 2.88E-04 | 1.85E-07 |
| 200.08318 | 211.38 | 15.25 | 8.76  | 8.65  | 8.75  | 6.56E-47  | 5.11E-15 | 5.11E-15 | 5.11E-15 | 9.95E-01 | 1.00E+00 | 9.97E-01 |
| 200.09423 | 267.22 | 20.98 | 18.80 | 19.21 | 19.43 | 1.48E-33  | 5.11E-15 | 1.31E-14 | 4.42E-14 | 5.22E-02 | 8.53E-04 | 5.11E-01 |
| 200.10105 | 141.52 | 15.58 | 14.66 | 14.74 | 15.24 | 2.91E-13  | 1.81E-11 | 5.40E-10 | 3.83E-02 | 9.23E-01 | 1.03E-04 | 1.01E-03 |
| 200.12921 | 186.88 | 16.63 | 16.14 | 15.93 | 16.37 | 4.58E-09  | 6.05E-05 | 2.36E-09 | 9.73E-02 | 2.16E-01 | 1.81E-01 | 6.45E-04 |

|           |        |       |       |       |       |          |          |          |          |          |          |          |
|-----------|--------|-------|-------|-------|-------|----------|----------|----------|----------|----------|----------|----------|
| 200.13733 | 194.39 | 18.23 | 16.92 | 16.52 | 17.93 | 9.75E-16 | 1.26E-08 | 1.31E-13 | 5.14E-01 | 2.35E-01 | 4.53E-05 | 3.85E-09 |
| 200.14892 | 22.31  | 14.61 | 15.96 | 13.17 | 13.63 | 3.67E-83 | 5.11E-15 | 5.11E-15 | 3.38E-14 | 5.11E-15 | 5.11E-15 | 1.18E-05 |
| 200.17373 | 200.04 | 17.66 | 16.28 | 15.95 | 16.68 | 9.43E-24 | 4.34E-14 | 1.62E-14 | 1.12E-08 | 1.33E-01 | 6.12E-02 | 3.33E-05 |
| 200.17395 | 85.72  | 15.65 | 11.88 | 12.44 | 13.44 | 1.95E-24 | 1.89E-14 | 4.50E-14 | 3.32E-09 | 3.58E-01 | 8.85E-05 | 2.36E-02 |
| 200.88959 | 26.85  | 11.92 | 11.44 | 12.10 | 10.08 | 3.89E-02 | 9.10E-01 | 9.95E-01 | 6.24E-02 | 8.10E-01 | 2.75E-01 | 3.87E-02 |
| 200.89255 | 124.26 | 16.41 | 15.26 | 15.18 | 15.56 | 2.11E-08 | 9.58E-07 | 1.01E-07 | 7.02E-04 | 9.81E-01 | 5.46E-01 | 3.21E-01 |
| 200.90817 | 29.82  | 14.21 | 13.89 | 14.45 | 13.76 | 1.64E-01 | 7.42E-01 | 8.81E-01 | 5.20E-01 | 3.21E-01 | 9.82E-01 | 1.75E-01 |
| 200.92393 | 161.92 | 14.74 | 15.29 | 15.09 | 15.21 | 1.90E-04 | 1.92E-04 | 3.62E-02 | 2.66E-03 | 4.26E-01 | 9.41E-01 | 7.98E-01 |
| 200.97305 | 19.61  | 12.64 | 16.72 | 16.56 | 16.31 | 4.80E-26 | 3.22E-14 | 3.80E-14 | 4.09E-14 | 9.74E-01 | 7.24E-01 | 9.20E-01 |
| 201.00196 | 29.55  | 16.25 | 15.47 | 14.92 | 15.43 | 2.10E-09 | 4.77E-04 | 2.83E-10 | 3.05E-04 | 2.89E-02 | 9.97E-01 | 6.09E-02 |
| 201.03879 | 203.93 | 16.03 | 17.70 | 17.87 | 18.08 | 5.86E-19 | 5.12E-12 | 6.93E-14 | 4.33E-14 | 8.74E-01 | 3.54E-01 | 7.92E-01 |
| 201.04177 | 290.98 | 16.52 | 14.72 | 12.79 | 11.65 | 1.97E-20 | 9.70E-04 | 3.91E-13 | 4.22E-14 | 4.13E-04 | 1.42E-08 | 9.42E-02 |
| 201.05213 | 291.4  | 15.73 | 16.28 | 16.13 | 16.88 | 5.17E-06 | 4.35E-02 | 2.08E-01 | 9.37E-07 | 9.01E-01 | 3.10E-02 | 3.55E-03 |
| 201.05245 | 19.17  | 15.34 | 15.59 | 15.36 | 15.64 | 2.06E-01 | 4.71E-01 | 9.99E-01 | 3.07E-01 | 5.60E-01 | 9.89E-01 | 3.84E-01 |
| 201.06492 | 91.46  | 14.20 | 14.38 | 14.29 | 14.42 | 7.40E-01 | 8.34E-01 | 9.72E-01 | 7.31E-01 | 9.78E-01 | 9.97E-01 | 9.32E-01 |
| 201.07123 | 177.23 | 8.09  | 13.40 | 12.79 | 11.10 | 1.49E-19 | 4.16E-14 | 5.03E-14 | 1.21E-06 | 6.89E-01 | 5.27E-04 | 1.86E-02 |
| 201.07163 | 19.96  | 15.21 | 16.33 | 14.97 | 15.14 | 1.24E-02 | 5.23E-02 | 9.48E-01 | 9.99E-01 | 1.36E-02 | 5.06E-02 | 9.83E-01 |
| 201.07793 | 285.47 | 18.80 | 17.49 | 17.39 | 17.53 | 1.39E-23 | 4.24E-14 | 4.13E-14 | 4.31E-14 | 9.08E-01 | 9.88E-01 | 7.62E-01 |
| 201.08865 | 289.13 | 19.29 | 18.05 | 18.10 | 18.24 | 8.65E-44 | 5.11E-15 | 5.11E-15 | 5.11E-15 | 9.10E-01 | 1.04E-01 | 3.49E-01 |
| 201.09761 | 287.36 | 16.99 | 15.89 | 16.15 | 16.11 | 1.14E-02 | 1.04E-02 | 7.94E-02 | 6.98E-02 | 8.81E-01 | 9.37E-01 | 9.99E-01 |
| 201.11319 | 290.21 | 18.38 | 17.81 | 17.91 | 18.24 | 7.14E-05 | 2.09E-04 | 2.75E-03 | 7.43E-01 | 8.97E-01 | 1.51E-02 | 8.85E-02 |
| 201.12484 | 21.69  | 14.47 | 16.24 | 15.01 | 15.56 | 3.92E-04 | 1.89E-04 | 5.60E-01 | 5.67E-02 | 2.19E-02 | 4.09E-01 | 5.93E-01 |
| 201.13593 | 85.96  | 14.96 | 15.20 | 14.88 | 16.28 | 1.36E-11 | 5.55E-01 | 9.80E-01 | 6.03E-10 | 3.46E-01 | 1.23E-06 | 1.53E-10 |
| 201.14966 | 282.7  | 17.32 | 16.68 | 16.68 | 16.99 | 2.97E-04 | 1.04E-03 | 8.37E-04 | 2.12E-01 | 1.00E+00 | 3.18E-01 | 3.00E-01 |
| 201.14968 | 169.12 | 18.16 | 17.21 | 17.23 | 17.98 | 1.46E-09 | 4.02E-07 | 5.45E-07 | 7.31E-01 | 1.00E+00 | 1.53E-04 | 2.05E-04 |
| 201.7443  | 227.47 | 15.33 | 12.14 | 12.09 | 13.40 | 8.56E-15 | 2.48E-12 | 8.40E-13 | 5.09E-05 | 1.00E+00 | 2.22E-02 | 1.53E-02 |
| 201.80243 | 19.26  | 16.16 | 15.83 | 15.77 | 16.20 | 4.79E-01 | 7.52E-01 | 6.44E-01 | 9.99E-01 | 9.98E-01 | 7.09E-01 | 6.04E-01 |
| 201.98861 | 248.85 | 18.86 | 18.14 | 18.14 | 18.36 | 8.56E-08 | 1.14E-06 | 7.32E-07 | 1.97E-03 | 1.00E+00 | 4.01E-01 | 3.72E-01 |
| 202.01254 | 31.83  | 17.19 | 15.96 | 16.07 | 15.85 | 1.53E-07 | 7.65E-06 | 4.24E-05 | 1.94E-06 | 9.76E-01 | 9.77E-01 | 8.47E-01 |
| 202.03931 | 29.47  | 15.57 | 14.96 | 15.51 | 16.35 | 3.41E-07 | 2.87E-02 | 9.94E-01 | 3.53E-03 | 6.55E-02 | 4.29E-08 | 1.84E-03 |
| 202.04906 | 30.19  | 16.53 | 15.37 | 15.63 | 16.03 | 2.18E-15 | 4.87E-14 | 5.24E-10 | 1.76E-03 | 2.32E-01 | 3.03E-05 | 2.36E-02 |
| 202.06211 | 92.36  | 15.62 | 15.80 | 15.98 | 16.23 | 3.61E-04 | 5.71E-01 | 5.07E-02 | 1.70E-04 | 5.99E-01 | 1.94E-02 | 3.04E-01 |
| 202.07331 | 289.96 | 20.08 | 18.06 | 18.46 | 18.28 | 1.26E-39 | 5.11E-15 | 5.77E-15 | 5.11E-15 | 2.08E-02 | 4.16E-01 | 5.74E-01 |
| 202.09111 | 22.38  | 8.89  | 16.12 | 16.55 | 10.37 | 2.43E-19 | 2.60E-13 | 4.96E-14 | 3.68E-01 | 9.64E-01 | 2.70E-08 | 1.58E-09 |
| 202.10895 | 19.01  | 16.51 | 16.57 | 16.37 | 16.49 | 6.05E-01 | 9.74E-01 | 7.80E-01 | 9.99E-01 | 5.41E-01 | 9.51E-01 | 8.71E-01 |
| 202.10911 | 175.55 | 15.64 | 14.85 | 14.63 | 14.74 | 1.80E-08 | 3.92E-05 | 7.07E-08 | 4.36E-06 | 6.08E-01 | 9.37E-01 | 9.29E-01 |
| 202.11667 | 150.74 | 16.02 | 15.49 | 15.47 | 15.74 | 5.04E-04 | 2.03E-03 | 1.11E-03 | 2.62E-01 | 9.99E-01 | 3.49E-01 | 2.79E-01 |
| 202.89239 | 54.11  | 17.00 | 15.11 | 15.37 | 15.62 | 6.98E-20 | 4.27E-14 | 5.86E-14 | 1.88E-10 | 5.35E-01 | 6.10E-02 | 6.15E-01 |
| 202.90443 | 42.14  | 15.00 | 16.66 | 12.53 | 12.76 | 1.14E-34 | 4.50E-07 | 8.43E-14 | 2.51E-11 | 5.11E-15 | 5.77E-15 | 8.84E-01 |
| 202.91311 | 52.81  | 17.97 | 16.32 | 16.98 | 17.62 | 1.01E-24 | 1.15E-14 | 1.42E-10 | 8.41E-02 | 4.53E-05 | 4.66E-14 | 1.29E-04 |
| 202.98744 | 196.58 | 19.09 | 17.86 | 17.98 | 17.07 | 6.08E-15 | 3.40E-07 | 3.87E-06 | 4.40E-14 | 9.51E-01 | 4.31E-03 | 5.88E-04 |
| 202.99787 | 33.38  | 16.15 | 14.64 | 16.24 | 16.16 | 7.84E-06 | 1.01E-04 | 9.93E-01 | 1.00E+00 | 4.83E-05 | 2.10E-04 | 9.97E-01 |
| 203.01967 | 29.6   | 20.14 | 19.12 | 19.16 | 19.63 | 1.24E-13 | 8.62E-12 | 3.78E-11 | 1.65E-03 | 9.90E-01 | 2.71E-03 | 6.76E-03 |
| 203.04243 | 159.63 | 15.73 | 15.79 | 15.62 | 16.08 | 3.96E-03 | 9.52E-01 | 8.13E-01 | 2.58E-02 | 5.15E-01 | 1.12E-01 | 2.08E-03 |
| 203.04274 | 17.08  | 17.97 | 18.24 | 17.96 | 18.13 | 1.10E-02 | 2.93E-02 | 9.97E-01 | 3.58E-01 | 1.98E-02 | 7.23E-01 | 2.77E-01 |

|           |        |       |       |       |       |          |          |          |          |          |          |          |
|-----------|--------|-------|-------|-------|-------|----------|----------|----------|----------|----------|----------|----------|
| 203.04589 | 30.38  | 17.16 | 16.57 | 16.41 | 16.14 | 1.19E-06 | 6.70E-03 | 2.32E-04 | 7.32E-07 | 8.24E-01 | 1.22E-01 | 5.05E-01 |
| 203.05735 | 289.52 | 18.12 | 17.58 | 17.53 | 17.16 | 1.97E-15 | 1.78E-06 | 1.29E-07 | 4.35E-14 | 9.68E-01 | 8.08E-04 | 3.63E-03 |
| 203.07836 | 132.2  | 13.88 | 14.47 | 14.72 | 15.13 | 7.11E-09 | 9.24E-03 | 4.46E-05 | 2.33E-09 | 5.37E-01 | 4.92E-03 | 1.60E-01 |
| 203.08286 | 22.08  | 21.49 | 20.83 | 21.08 | 21.21 | 2.37E-12 | 3.89E-13 | 5.75E-06 | 5.63E-03 | 1.69E-02 | 1.09E-04 | 4.33E-01 |
| 203.09378 | 281.95 | 18.16 | 16.91 | 16.96 | 16.85 | 2.11E-25 | 4.22E-14 | 4.37E-14 | 4.02E-14 | 9.73E-01 | 9.67E-01 | 8.11E-01 |
| 203.10419 | 18.36  | 16.65 | 17.38 | 17.61 | 17.18 | 3.41E-16 | 4.32E-10 | 4.20E-14 | 1.07E-05 | 1.29E-01 | 3.14E-01 | 8.09E-04 |
| 203.10657 | 176.44 | 14.88 | 13.51 | 13.84 | 13.29 | 1.15E-05 | 2.25E-04 | 8.31E-03 | 2.06E-05 | 7.48E-01 | 9.16E-01 | 3.62E-01 |
| 203.12902 | 155.54 | 14.96 | 14.28 | 14.74 | 14.68 | 1.59E-04 | 4.35E-05 | 4.51E-01 | 2.46E-01 | 1.31E-02 | 5.69E-02 | 9.74E-01 |
| 203.18058 | 209.05 | 15.65 | 14.54 | 14.97 | 14.62 | 2.29E-03 | 2.89E-03 | 1.38E-01 | 9.69E-03 | 5.28E-01 | 9.93E-01 | 7.18E-01 |
| 203.18066 | 99.36  | 11.28 | 7.54  | 11.21 | 10.28 | 4.21E-11 | 4.55E-10 | 9.99E-01 | 2.81E-01 | 2.07E-09 | 2.21E-05 | 3.64E-01 |
| 204.00502 | 20.41  | 18.46 | 18.38 | 17.88 | 18.57 | 9.22E-06 | 9.16E-01 | 1.39E-04 | 8.89E-01 | 2.58E-03 | 5.53E-01 | 1.75E-05 |
| 204.02182 | 35.6   | 15.52 | 11.44 | 11.04 | 12.67 | 2.99E-48 | 5.11E-15 | 5.11E-15 | 2.60E-14 | 4.04E-01 | 3.27E-05 | 1.50E-08 |
| 204.03392 | 18.43  | 17.01 | 17.06 | 17.49 | 17.76 | 2.71E-04 | 9.94E-01 | 5.21E-02 | 7.40E-04 | 1.16E-01 | 2.71E-03 | 5.09E-01 |
| 204.05212 | 186.57 | 17.44 | 16.15 | 15.88 | 16.38 | 5.69E-19 | 4.08E-13 | 4.35E-14 | 5.17E-09 | 3.59E-01 | 5.20E-01 | 1.68E-02 |
| 204.05266 | 291.49 | 16.63 | 16.63 | 16.59 | 16.15 | 3.03E-02 | 1.00E+00 | 9.94E-01 | 4.08E-02 | 9.97E-01 | 5.47E-02 | 8.64E-02 |
| 204.06109 | 207.78 | 13.88 | 7.95  | 8.27  | 8.33  | 1.24E-32 | 5.33E-15 | 7.55E-15 | 1.55E-14 | 9.12E-01 | 8.71E-01 | 9.99E-01 |
| 204.06704 | 22.3   | 16.36 | 16.33 | 15.51 | 15.61 | 1.58E-03 | 9.99E-01 | 9.34E-03 | 3.91E-02 | 1.77E-02 | 6.32E-02 | 9.82E-01 |
| 204.07114 | 19.06  | 15.19 | 13.22 | 14.10 | 15.50 | 6.27E-07 | 2.61E-05 | 4.39E-02 | 8.88E-01 | 1.72E-01 | 3.19E-06 | 8.33E-03 |
| 204.07808 | 212.89 | 16.39 | 9.92  | 10.17 | 9.87  | 1.94E-18 | 6.71E-14 | 1.56E-13 | 1.09E-13 | 9.89E-01 | 1.00E+00 | 9.83E-01 |
| 204.08901 | 286.51 | 18.94 | 17.47 | 17.72 | 17.49 | 6.50E-25 | 3.60E-14 | 4.49E-14 | 4.26E-14 | 2.83E-01 | 9.99E-01 | 3.72E-01 |
| 204.12443 | 23.49  | 15.39 | 15.72 | 15.38 | 14.64 | 1.86E-02 | 7.40E-01 | 1.00E+00 | 1.14E-01 | 7.44E-01 | 1.00E-02 | 1.29E-01 |
| 204.8898  | 43.09  | 15.27 | 10.99 | 14.68 | 14.97 | 5.80E-25 | 2.26E-14 | 4.11E-01 | 8.73E-01 | 4.30E-14 | 4.35E-14 | 8.88E-01 |
| 204.91338 | 167.36 | 17.45 | 20.70 | 20.93 | 20.43 | 4.21E-49 | 5.11E-15 | 5.11E-15 | 5.11E-15 | 6.58E-01 | 5.90E-01 | 8.13E-02 |
| 204.94412 | 20.19  | 14.04 | 8.48  | 8.54  | 11.51 | 2.84E-43 | 5.11E-15 | 5.11E-15 | 3.06E-10 | 9.98E-01 | 3.71E-13 | 6.54E-13 |
| 204.97077 | 151.39 | 18.17 | 16.62 | 16.04 | 16.93 | 2.76E-27 | 4.26E-14 | 5.11E-15 | 6.64E-11 | 4.74E-03 | 2.90E-01 | 4.73E-06 |
| 204.99116 | 53.5   | 15.90 | 17.95 | 12.17 | 13.39 | 5.14E-52 | 1.10E-10 | 5.11E-15 | 7.29E-14 | 5.11E-15 | 5.11E-15 | 4.51E-04 |
| 204.99914 | 18.47  | 12.85 | 15.99 | 15.50 | 15.74 | 1.93E-15 | 2.73E-13 | 3.04E-10 | 3.68E-11 | 6.11E-01 | 9.31E-01 | 9.36E-01 |
| 205.01798 | 22.81  | 16.86 | 16.67 | 16.54 | 16.94 | 5.19E-02 | 5.76E-01 | 1.41E-01 | 9.65E-01 | 8.40E-01 | 3.39E-01 | 6.26E-02 |
| 205.0363  | 143.82 | 16.40 | 16.12 | 15.42 | 16.33 | 1.65E-07 | 3.87E-01 | 2.91E-07 | 9.76E-01 | 6.51E-04 | 6.88E-01 | 8.89E-06 |
| 205.06203 | 91.15  | 14.96 | 13.33 | 14.41 | 14.19 | 5.42E-11 | 5.94E-12 | 5.04E-02 | 3.20E-03 | 1.04E-05 | 1.14E-03 | 7.62E-01 |
| 205.07307 | 286.85 | 20.98 | 19.20 | 19.52 | 19.21 | 7.99E-50 | 5.11E-15 | 5.11E-15 | 5.11E-15 | 1.20E-02 | 9.99E-01 | 2.41E-02 |
| 205.08716 | 176.46 | 16.29 | 15.34 | 15.97 | 15.81 | 6.57E-07 | 1.19E-07 | 1.90E-01 | 2.44E-02 | 1.21E-03 | 3.26E-02 | 8.04E-01 |
| 205.09269 | 208.3  | 14.75 | 9.19  | 8.43  | 9.94  | 7.90E-32 | 1.31E-14 | 5.11E-15 | 4.51E-14 | 4.08E-01 | 4.49E-01 | 1.53E-02 |
| 205.12352 | 189.75 | 16.83 | 16.21 | 16.21 | 16.06 | 2.73E-06 | 3.29E-04 | 2.84E-04 | 6.31E-06 | 1.00E+00 | 7.54E-01 | 7.49E-01 |
| 205.15987 | 218.29 | 19.28 | 20.04 | 20.24 | 19.19 | 9.90E-22 | 3.18E-10 | 4.62E-14 | 8.80E-01 | 2.87E-01 | 3.78E-11 | 4.25E-14 |
| 205.19639 | 234.15 | 17.43 | 16.27 | 16.71 | 17.00 | 7.60E-21 | 3.13E-14 | 3.98E-10 | 5.68E-04 | 5.33E-04 | 4.38E-09 | 4.72E-02 |
| 205.91693 | 92.69  | 14.73 | 13.44 | 13.71 | 13.78 | 1.25E-02 | 1.07E-02 | 6.26E-02 | 1.15E-01 | 9.20E-01 | 8.63E-01 | 9.98E-01 |
| 206.00223 | 25.35  | 17.27 | 16.32 | 16.16 | 16.80 | 4.22E-12 | 1.56E-08 | 2.42E-11 | 1.64E-02 | 7.25E-01 | 1.67E-02 | 4.56E-04 |
| 206.01106 | 30.6   | 17.99 | 16.90 | 16.83 | 16.80 | 3.88E-23 | 4.22E-14 | 4.26E-14 | 4.26E-14 | 9.51E-01 | 8.64E-01 | 9.93E-01 |
| 206.05785 | 109.39 | 15.72 | 13.80 | 14.18 | 14.35 | 3.89E-25 | 1.15E-14 | 4.39E-14 | 2.65E-13 | 1.08E-01 | 9.54E-03 | 7.63E-01 |
| 206.06714 | 210.82 | 19.96 | 19.00 | 18.80 | 19.33 | 6.43E-04 | 6.66E-03 | 5.19E-04 | 1.52E-01 | 9.11E-01 | 7.20E-01 | 3.23E-01 |
| 206.08426 | 148.99 | 14.78 | 13.42 | 13.86 | 14.56 | 1.37E-06 | 3.25E-06 | 2.86E-03 | 8.47E-01 | 3.62E-01 | 3.39E-04 | 5.68E-02 |
| 206.09375 | 213.16 | 15.24 | 10.43 | 10.13 | 10.91 | 7.17E-12 | 3.78E-09 | 2.61E-10 | 2.67E-07 | 9.79E-01 | 9.26E-01 | 7.44E-01 |
| 206.10377 | 25.34  | 20.59 | 20.19 | 20.69 | 20.64 | 7.67E-06 | 4.78E-04 | 7.94E-01 | 9.76E-01 | 1.56E-05 | 2.20E-04 | 9.67E-01 |
| 206.10422 | 193.75 | 16.21 | 16.39 | 15.41 | 15.30 | 7.14E-10 | 7.58E-01 | 8.68E-05 | 1.16E-05 | 1.95E-06 | 2.40E-07 | 9.32E-01 |

|           |        |       |       |       |       |          |          |          |          |          |          |          |
|-----------|--------|-------|-------|-------|-------|----------|----------|----------|----------|----------|----------|----------|
| 206.16326 | 215.18 | 15.98 | 16.62 | 16.96 | 15.80 | 1.37E-19 | 1.38E-06 | 1.28E-13 | 4.90E-01 | 2.94E-02 | 4.41E-09 | 4.33E-14 |
| 206.91151 | 106.8  | 17.16 | 15.65 | 15.98 | 15.98 | 2.05E-19 | 4.37E-14 | 2.31E-12 | 9.47E-12 | 1.42E-01 | 1.76E-01 | 1.00E+00 |
| 206.96783 | 105.35 | 15.96 | 15.08 | 15.17 | 16.26 | 1.48E-10 | 1.85E-05 | 1.27E-04 | 3.79E-01 | 9.64E-01 | 2.90E-08 | 2.49E-07 |
| 206.98906 | 27.73  | 15.40 | 15.38 | 14.27 | 14.77 | 1.07E-04 | 1.00E+00 | 3.14E-04 | 1.26E-01 | 6.32E-04 | 1.62E-01 | 3.05E-01 |
| 207.05107 | 290.27 | 17.85 | 17.79 | 17.69 | 17.87 | 2.11E-01 | 9.05E-01 | 2.71E-01 | 9.97E-01 | 6.95E-01 | 8.39E-01 | 2.29E-01 |
| 207.05113 | 194.68 | 19.01 | 19.32 | 19.08 | 18.70 | 6.51E-02 | 4.86E-01 | 9.86E-01 | 4.96E-01 | 7.13E-01 | 3.54E-02 | 3.24E-01 |
| 207.06647 | 161.35 | 15.87 | 15.54 | 15.53 | 15.55 | 5.42E-03 | 1.94E-02 | 1.35E-02 | 2.70E-02 | 1.00E+00 | 1.00E+00 | 9.99E-01 |
| 207.07053 | 158.1  | 16.27 | 14.44 | 14.43 | 15.00 | 1.56E-26 | 2.51E-14 | 1.98E-14 | 8.63E-12 | 1.00E+00 | 8.27E-03 | 5.75E-03 |
| 207.07793 | 23.69  | 15.49 | 14.45 | 14.12 | 14.20 | 3.42E-03 | 5.76E-02 | 4.93E-03 | 1.37E-02 | 8.60E-01 | 9.43E-01 | 9.97E-01 |
| 207.08883 | 90.83  | 16.12 | 14.25 | 14.39 | 14.74 | 2.27E-30 | 5.33E-15 | 1.04E-14 | 4.24E-14 | 7.86E-01 | 1.21E-02 | 1.26E-01 |
| 207.10282 | 212.82 | 17.87 | 17.78 | 18.02 | 17.79 | 5.97E-02 | 7.48E-01 | 4.07E-01 | 8.45E-01 | 6.40E-02 | 9.99E-01 | 1.07E-01 |
| 207.10727 | 26.54  | 16.46 | 15.68 | 16.14 | 16.19 | 4.84E-10 | 4.88E-11 | 1.77E-02 | 6.58E-02 | 2.22E-04 | 8.51E-05 | 9.82E-01 |
| 207.13923 | 167.68 | 15.94 | 13.81 | 14.60 | 14.72 | 1.15E-25 | 5.33E-15 | 4.84E-13 | 1.61E-10 | 5.85E-05 | 5.43E-06 | 9.04E-01 |
| 207.93252 | 86.98  | 16.07 | 14.50 | 14.63 | 14.94 | 1.57E-19 | 4.11E-14 | 4.51E-14 | 1.21E-09 | 8.78E-01 | 5.99E-02 | 2.71E-01 |
| 207.96903 | 37.07  | 21.45 | 20.73 | 21.20 | 20.31 | 8.62E-04 | 5.83E-02 | 8.17E-01 | 7.84E-04 | 3.66E-01 | 5.13E-01 | 1.69E-02 |
| 207.99016 | 27.74  | 13.81 | 14.28 | 14.42 | 14.33 | 1.24E-01 | 3.28E-01 | 1.22E-01 | 2.59E-01 | 9.61E-01 | 9.98E-01 | 9.91E-01 |
| 207.99959 | 31.39  | 19.67 | 21.34 | 21.54 | 20.61 | 1.95E-48 | 5.11E-15 | 5.11E-15 | 4.54E-14 | 2.36E-01 | 1.60E-09 | 6.02E-14 |
| 208.01831 | 18.92  | 17.47 | 18.57 | 18.63 | 18.52 | 3.00E-18 | 1.43E-13 | 4.60E-14 | 3.30E-12 | 9.63E-01 | 9.87E-01 | 8.50E-01 |
| 208.03877 | 17.45  | 16.56 | 16.75 | 16.52 | 16.53 | 6.91E-01 | 8.07E-01 | 9.98E-01 | 9.99E-01 | 7.12E-01 | 7.47E-01 | 1.00E+00 |
| 208.05457 | 133.64 | 15.45 | 14.43 | 13.86 | 14.65 | 8.25E-19 | 2.32E-09 | 3.97E-14 | 6.87E-06 | 2.17E-03 | 5.33E-01 | 1.22E-05 |
| 208.06288 | 292.65 | 17.70 | 16.54 | 16.67 | 16.88 | 4.31E-19 | 4.12E-14 | 5.80E-14 | 2.22E-09 | 7.39E-01 | 4.64E-02 | 3.55E-01 |
| 208.08269 | 274.29 | 18.63 | 17.71 | 17.40 | 18.01 | 1.79E-13 | 3.24E-08 | 1.35E-13 | 4.43E-04 | 1.72E-01 | 2.58E-01 | 8.62E-04 |
| 208.09173 | 153.74 | 14.29 | 14.34 | 13.93 | 13.26 | 1.51E-02 | 9.99E-01 | 7.27E-01 | 2.29E-02 | 6.62E-01 | 1.96E-02 | 2.59E-01 |
| 208.09864 | 163.33 | 15.05 | 14.30 | 14.27 | 14.82 | 6.01E-09 | 8.79E-07 | 3.13E-07 | 4.05E-01 | 9.99E-01 | 1.96E-03 | 1.02E-03 |
| 208.11935 | 56.53  | 18.46 | 16.96 | 17.90 | 18.35 | 3.06E-17 | 4.31E-14 | 3.74E-03 | 9.07E-01 | 3.49E-07 | 4.26E-13 | 4.78E-02 |
| 208.92124 | 142.9  | 18.55 | 16.90 | 16.70 | 17.69 | 6.35E-24 | 4.29E-14 | 2.86E-14 | 1.21E-05 | 6.57E-01 | 9.31E-05 | 4.28E-07 |
| 208.92139 | 30.48  | 16.44 | 17.00 | 17.17 | 16.34 | 7.75E-05 | 2.78E-02 | 1.95E-03 | 9.64E-01 | 8.64E-01 | 1.08E-02 | 7.06E-04 |
| 208.93458 | 148.12 | 15.55 | 13.89 | 14.01 | 15.29 | 2.69E-11 | 1.31E-08 | 1.12E-07 | 7.71E-01 | 9.70E-01 | 7.57E-06 | 4.45E-05 |
| 208.97381 | 125.51 | 10.75 | 14.58 | 14.52 | 14.35 | 4.10E-27 | 2.93E-14 | 3.15E-14 | 4.46E-14 | 9.99E-01 | 9.22E-01 | 9.62E-01 |
| 208.98529 | 29.63  | 23.23 | 23.26 | 23.23 | 23.67 | 5.64E-04 | 9.94E-01 | 1.00E+00 | 1.30E-03 | 9.97E-01 | 4.47E-03 | 2.08E-03 |
| 209.00435 | 192.16 | 16.51 | 15.26 | 15.22 | 15.80 | 4.27E-17 | 1.04E-13 | 5.13E-14 | 4.08E-05 | 9.94E-01 | 4.45E-03 | 1.67E-03 |
| 209.00447 | 45.79  | 18.42 | 17.12 | 17.22 | 17.16 | 2.85E-06 | 2.99E-05 | 1.13E-04 | 9.59E-05 | 9.86E-01 | 9.99E-01 | 9.98E-01 |
| 209.01956 | 17.95  | 14.96 | 15.69 | 15.57 | 15.96 | 2.08E-04 | 7.15E-03 | 3.51E-02 | 1.20E-04 | 9.47E-01 | 6.59E-01 | 3.30E-01 |
| 209.0307  | 19.04  | 19.99 | 22.41 | 22.21 | 22.15 | 9.96E-50 | 5.11E-15 | 5.11E-15 | 5.11E-15 | 5.21E-01 | 3.01E-01 | 9.73E-01 |
| 209.04571 | 146    | 14.86 | 14.42 | 13.90 | 14.44 | 1.43E-07 | 3.01E-02 | 1.53E-08 | 4.82E-02 | 5.97E-03 | 1.00E+00 | 5.57E-03 |
| 209.05814 | 290.53 | 17.03 | 15.73 | 15.83 | 15.80 | 1.81E-07 | 2.83E-06 | 1.46E-05 | 1.74E-05 | 9.80E-01 | 9.94E-01 | 9.99E-01 |
| 209.06683 | 162.57 | 19.76 | 19.76 | 20.09 | 19.60 | 3.13E-01 | 1.00E+00 | 5.57E-01 | 9.33E-01 | 5.73E-01 | 9.42E-01 | 2.64E-01 |
| 209.0833  | 156.8  | 16.37 | 14.25 | 13.79 | 14.65 | 3.76E-26 | 4.33E-14 | 7.33E-15 | 1.88E-12 | 1.68E-01 | 3.11E-01 | 1.25E-03 |
| 209.08359 | 289.21 | 16.60 | 11.68 | 11.30 | 12.18 | 4.96E-33 | 6.88E-15 | 5.11E-15 | 3.69E-14 | 8.00E-01 | 6.50E-01 | 1.69E-01 |
| 209.11839 | 272.71 | 18.16 | 17.23 | 17.31 | 17.19 | 4.68E-24 | 4.26E-14 | 4.34E-14 | 4.14E-14 | 8.35E-01 | 9.70E-01 | 5.82E-01 |
| 209.15488 | 167.28 | 15.44 | 14.59 | 14.57 | 14.65 | 5.92E-08 | 2.46E-06 | 1.16E-06 | 2.41E-05 | 1.00E+00 | 9.85E-01 | 9.69E-01 |
| 209.96728 | 31.5   | 16.75 | 16.12 | 16.04 | 15.52 | 5.36E-04 | 1.11E-01 | 5.17E-02 | 1.57E-04 | 9.92E-01 | 1.79E-01 | 2.92E-01 |
| 209.98978 | 26.54  | 18.79 | 18.74 | 18.78 | 19.24 | 3.55E-04 | 9.66E-01 | 9.99E-01 | 2.66E-03 | 9.89E-01 | 7.48E-04 | 2.09E-03 |
| 209.99954 | 32.94  | 17.38 | 17.28 | 17.39 | 17.07 | 3.85E-02 | 8.29E-01 | 1.00E+00 | 5.22E-02 | 7.81E-01 | 3.30E-01 | 4.51E-02 |
| 210.03435 | 19.24  | 15.60 | 17.60 | 17.46 | 17.44 | 5.20E-35 | 5.11E-15 | 5.33E-15 | 7.77E-15 | 7.82E-01 | 7.23E-01 | 9.99E-01 |

|           |        |       |       |       |       |          |          |          |          |          |          |          |
|-----------|--------|-------|-------|-------|-------|----------|----------|----------|----------|----------|----------|----------|
| 210.05407 | 160.77 | 16.66 | 15.58 | 15.45 | 16.24 | 3.42E-17 | 2.84E-12 | 4.77E-14 | 2.00E-02 | 7.98E-01 | 7.86E-05 | 1.12E-06 |
| 210.05986 | 27.7   | 13.90 | 14.62 | 12.07 | 12.71 | 1.19E-45 | 4.93E-06 | 5.11E-15 | 3.65E-13 | 5.11E-15 | 5.33E-15 | 1.74E-04 |
| 210.06564 | 24.07  | 16.17 | 15.98 | 15.80 | 16.14 | 3.58E-02 | 5.20E-01 | 3.69E-02 | 9.97E-01 | 5.75E-01 | 6.86E-01 | 8.66E-02 |
| 210.07034 | 125.12 | 15.93 | 15.43 | 15.69 | 15.50 | 1.43E-04 | 1.68E-04 | 1.64E-01 | 2.21E-03 | 1.35E-01 | 9.47E-01 | 4.01E-01 |
| 210.0704  | 22.55  | 15.99 | 15.88 | 15.94 | 15.77 | 6.14E-01 | 9.14E-01 | 9.92E-01 | 5.68E-01 | 9.83E-01 | 9.20E-01 | 7.48E-01 |
| 210.07857 | 270.91 | 20.61 | 19.06 | 19.46 | 19.31 | 1.18E-22 | 3.40E-14 | 4.07E-13 | 4.60E-14 | 3.24E-02 | 3.62E-01 | 7.28E-01 |
| 210.08923 | 179.69 | 17.86 | 16.88 | 17.17 | 17.35 | 1.21E-09 | 3.55E-10 | 1.27E-05 | 2.96E-03 | 1.83E-01 | 1.14E-02 | 6.53E-01 |
| 210.11377 | 135.6  | 14.81 | 14.00 | 13.57 | 13.86 | 2.93E-13 | 2.41E-06 | 2.40E-13 | 5.34E-08 | 3.10E-02 | 8.23E-01 | 2.63E-01 |
| 210.12184 | 145.57 | 15.17 | 13.93 | 13.80 | 13.67 | 4.53E-15 | 1.20E-09 | 1.31E-11 | 1.15E-12 | 9.02E-01 | 5.60E-01 | 9.17E-01 |
| 210.88214 | 88.63  | 15.03 | 15.62 | 15.51 | 15.29 | 8.04E-07 | 1.09E-06 | 8.15E-05 | 9.98E-02 | 7.70E-01 | 2.35E-02 | 2.11E-01 |
| 210.91833 | 151.17 | 16.22 | 14.99 | 14.57 | 15.35 | 8.73E-30 | 4.13E-14 | 5.11E-15 | 3.97E-10 | 5.18E-03 | 3.23E-02 | 3.77E-08 |
| 210.93707 | 28.95  | 17.25 | 17.73 | 18.30 | 17.08 | 1.56E-13 | 9.10E-03 | 1.91E-10 | 6.92E-01 | 1.70E-03 | 3.65E-04 | 2.82E-12 |
| 210.96283 | 45.17  | 20.65 | 20.09 | 20.61 | 20.61 | 1.39E-06 | 5.78E-06 | 9.81E-01 | 9.87E-01 | 4.82E-05 | 7.98E-05 | 1.00E+00 |
| 210.9834  | 26.42  | 21.42 | 21.43 | 21.44 | 21.90 | 1.82E-04 | 9.99E-01 | 9.97E-01 | 4.84E-04 | 1.00E+00 | 1.20E-03 | 1.34E-03 |
| 210.99109 | 22.36  | 16.20 | 15.33 | 15.04 | 15.89 | 8.71E-06 | 2.03E-03 | 1.31E-05 | 6.00E-01 | 6.47E-01 | 1.20E-01 | 4.66E-03 |
| 211.02859 | 20.99  | 16.18 | 16.99 | 16.00 | 15.76 | 2.17E-06 | 1.88E-03 | 8.46E-01 | 2.51E-01 | 1.14E-04 | 2.04E-06 | 7.23E-01 |
| 211.04661 | 158.41 | 14.90 | 13.87 | 13.67 | 14.09 | 3.69E-10 | 3.53E-07 | 5.87E-10 | 1.49E-04 | 6.91E-01 | 6.66E-01 | 1.21E-01 |
| 211.05582 | 32.1   | 16.19 | 16.32 | 16.28 | 16.30 | 8.79E-01 | 8.70E-01 | 9.50E-01 | 9.26E-01 | 9.96E-01 | 9.99E-01 | 1.00E+00 |
| 211.06174 | 178.06 | 16.16 | 15.07 | 15.31 | 15.36 | 8.34E-13 | 1.81E-12 | 2.49E-08 | 5.15E-07 | 3.42E-01 | 2.00E-01 | 9.83E-01 |
| 211.07377 | 278.02 | 20.35 | 18.89 | 19.06 | 18.85 | 1.52E-33 | 5.33E-15 | 1.98E-14 | 5.33E-15 | 4.83E-01 | 9.87E-01 | 3.10E-01 |
| 211.08201 | 290.01 | 16.72 | 14.39 | 15.05 | 15.27 | 1.81E-09 | 7.17E-10 | 1.16E-05 | 3.21E-04 | 2.39E-01 | 7.78E-02 | 9.33E-01 |
| 211.09778 | 286.54 | 17.15 | 17.10 | 17.02 | 17.18 | 6.20E-01 | 9.70E-01 | 7.23E-01 | 9.95E-01 | 9.39E-01 | 9.11E-01 | 6.07E-01 |
| 211.09783 | 21.44  | 16.33 | 15.58 | 15.57 | 15.64 | 1.70E-16 | 6.27E-13 | 2.04E-13 | 7.74E-11 | 9.99E-01 | 9.37E-01 | 8.92E-01 |
| 211.10912 | 47.27  | 14.08 | 14.79 | 10.45 | 10.24 | 5.47E-19 | 5.46E-01 | 5.20E-10 | 2.18E-10 | 7.29E-13 | 3.75E-13 | 9.81E-01 |
| 211.13401 | 264.74 | 18.84 | 18.24 | 18.19 | 18.03 | 3.70E-10 | 5.05E-06 | 4.72E-07 | 1.60E-09 | 9.74E-01 | 3.60E-01 | 6.06E-01 |
| 211.17047 | 181.68 | 16.69 | 14.86 | 14.82 | 15.93 | 6.18E-23 | 4.35E-14 | 4.17E-14 | 5.36E-04 | 9.97E-01 | 1.00E-06 | 2.83E-07 |
| 211.97104 | 29.53  | 15.21 | 15.31 | 15.02 | 15.26 | 7.05E-01 | 9.75E-01 | 8.83E-01 | 9.97E-01 | 6.74E-01 | 9.97E-01 | 8.11E-01 |
| 211.98674 | 26.69  | 16.83 | 16.61 | 16.58 | 17.13 | 1.03E-03 | 4.03E-01 | 2.82E-01 | 1.73E-01 | 9.97E-01 | 3.42E-03 | 1.51E-03 |
| 212.00278 | 19     | 20.82 | 20.89 | 21.03 | 21.36 | 1.43E-02 | 9.70E-01 | 6.00E-01 | 1.03E-02 | 8.68E-01 | 4.49E-02 | 2.30E-01 |
| 212.0217  | 27.41  | 15.87 | 16.79 | 16.90 | 15.98 | 8.26E-09 | 1.54E-05 | 8.83E-07 | 9.44E-01 | 9.48E-01 | 4.42E-04 | 4.30E-05 |
| 212.0333  | 176.09 | 16.03 | 15.48 | 15.00 | 16.42 | 9.90E-09 | 6.13E-02 | 2.09E-05 | 3.05E-01 | 1.37E-01 | 3.77E-04 | 1.53E-08 |
| 212.05104 | 158.06 | 14.63 | 12.18 | 8.92  | 12.15 | 4.81E-23 | 5.26E-06 | 8.88E-15 | 7.37E-06 | 1.96E-09 | 1.00E+00 | 6.55E-09 |
| 212.05776 | 290.85 | 18.44 | 17.02 | 16.98 | 17.04 | 1.34E-32 | 7.33E-15 | 5.77E-15 | 1.35E-14 | 9.93E-01 | 9.98E-01 | 9.72E-01 |
| 212.06803 | 290.72 | 16.98 | 16.80 | 16.57 | 17.11 | 2.66E-03 | 5.94E-01 | 2.10E-02 | 8.20E-01 | 3.86E-01 | 1.78E-01 | 2.18E-03 |
| 212.07724 | 290.14 | 16.40 | 14.35 | 13.44 | 14.23 | 1.33E-12 | 9.42E-07 | 8.59E-13 | 3.89E-07 | 8.88E-02 | 9.90E-01 | 1.95E-01 |
| 212.09425 | 266.56 | 20.47 | 18.68 | 19.04 | 19.29 | 5.61E-24 | 1.64E-14 | 4.19E-14 | 2.89E-11 | 1.09E-01 | 1.58E-03 | 4.31E-01 |
| 212.10414 | 163.91 | 15.00 | 14.15 | 13.86 | 14.63 | 8.50E-11 | 2.55E-06 | 1.47E-10 | 1.20E-01 | 3.14E-01 | 3.01E-02 | 6.96E-05 |
| 212.12938 | 154.73 | 15.25 | 14.70 | 13.96 | 14.52 | 1.48E-11 | 6.76E-03 | 1.33E-12 | 1.72E-04 | 1.04E-04 | 7.21E-01 | 7.92E-03 |
| 212.13736 | 189.67 | 17.41 | 16.31 | 16.37 | 16.42 | 2.31E-17 | 7.13E-14 | 2.43E-13 | 1.45E-11 | 9.81E-01 | 8.66E-01 | 9.77E-01 |
| 212.88733 | 25.77  | 16.68 | 16.60 | 16.16 | 17.09 | 4.38E-05 | 9.67E-01 | 1.85E-02 | 1.29E-01 | 7.90E-02 | 5.22E-02 | 9.15E-06 |
| 212.92121 | 48.66  | 22.46 | 22.48 | 23.17 | 23.04 | 4.16E-24 | 9.98E-01 | 4.51E-14 | 1.96E-12 | 4.32E-14 | 2.02E-11 | 3.69E-01 |
| 212.9341  | 35.4   | 15.75 | 15.56 | 16.13 | 14.80 | 7.02E-07 | 8.21E-01 | 3.06E-01 | 2.35E-04 | 5.68E-02 | 7.21E-03 | 1.71E-07 |
| 212.94149 | 81.14  | 15.36 | 14.03 | 14.83 | 15.50 | 4.48E-18 | 5.03E-14 | 3.95E-03 | 7.99E-01 | 4.09E-06 | 4.29E-14 | 2.81E-04 |
| 212.96102 | 43.82  | 15.92 | 15.22 | 15.61 | 15.85 | 1.12E-07 | 1.70E-07 | 5.10E-02 | 9.59E-01 | 1.04E-02 | 7.90E-06 | 2.09E-01 |
| 212.96976 | 37.97  | 14.90 | 15.08 | 15.41 | 14.36 | 5.61E-03 | 9.13E-01 | 2.59E-01 | 2.43E-01 | 6.66E-01 | 7.18E-02 | 2.40E-03 |



|           |        |       |       |       |       |          |          |          |          |          |          |          |
|-----------|--------|-------|-------|-------|-------|----------|----------|----------|----------|----------|----------|----------|
| 212.97857 | 114.31 | 12.03 | 14.05 | 16.71 | 14.94 | 1.21E-13 | 1.84E-03 | 5.81E-14 | 3.91E-06 | 2.60E-05 | 4.26E-01 | 1.33E-02 |
| 212.98074 | 20.04  | 15.82 | 17.00 | 17.26 | 17.08 | 3.08E-13 | 1.97E-08 | 4.69E-12 | 4.18E-09 | 5.33E-01 | 9.73E-01 | 8.14E-01 |
| 213.00081 | 25.04  | 15.83 | 15.92 | 16.18 | 17.04 | 3.56E-07 | 9.73E-01 | 3.54E-01 | 5.01E-07 | 6.40E-01 | 7.37E-06 | 7.94E-04 |
| 213.0063  | 19.2   | 16.86 | 16.97 | 17.03 | 17.35 | 1.11E-02 | 8.77E-01 | 6.45E-01 | 5.94E-03 | 9.78E-01 | 6.09E-02 | 1.44E-01 |
| 213.0073  | 162.2  | 14.24 | 14.71 | 14.58 | 15.03 | 3.11E-02 | 2.59E-01 | 5.51E-01 | 1.62E-02 | 9.55E-01 | 6.47E-01 | 3.34E-01 |
| 213.01538 | 290.62 | 14.50 | 13.94 | 15.69 | 17.12 | 3.47E-24 | 1.51E-01 | 6.81E-05 | 4.46E-14 | 4.64E-09 | 2.04E-14 | 4.49E-06 |
| 213.01677 | 172.64 | 14.24 | 13.66 | 12.74 | 13.87 | 3.30E-04 | 3.48E-01 | 1.31E-04 | 7.31E-01 | 5.09E-02 | 9.41E-01 | 1.20E-02 |
| 213.01752 | 21.74  | 16.92 | 16.79 | 15.34 | 15.30 | 2.56E-10 | 9.72E-01 | 5.51E-07 | 7.17E-07 | 9.35E-06 | 1.06E-05 | 9.99E-01 |
| 213.02565 | 293.66 | 17.52 | 17.39 | 17.43 | 17.79 | 1.52E-02 | 7.15E-01 | 9.02E-01 | 1.56E-01 | 9.83E-01 | 1.37E-02 | 3.61E-02 |
| 213.04098 | 167.28 | 14.27 | 14.26 | 14.16 | 14.36 | 8.30E-01 | 1.00E+00 | 9.47E-01 | 9.73E-01 | 9.60E-01 | 9.68E-01 | 7.82E-01 |
| 213.04962 | 30.52  | 20.82 | 21.03 | 21.15 | 20.88 | 4.67E-02 | 3.36E-01 | 4.46E-02 | 9.71E-01 | 8.01E-01 | 6.51E-01 | 1.71E-01 |
| 213.05514 | 169.42 | 15.48 | 14.64 | 14.44 | 14.97 | 9.33E-15 | 7.52E-10 | 6.31E-14 | 5.26E-04 | 3.64E-01 | 5.87E-02 | 2.90E-04 |
| 213.05548 | 29.42  | 19.88 | 17.88 | 17.56 | 17.58 | 3.52E-28 | 4.33E-14 | 1.42E-14 | 2.64E-14 | 4.23E-01 | 4.97E-01 | 1.00E+00 |
| 213.06707 | 193.85 | 19.49 | 18.13 | 18.18 | 18.64 | 2.35E-53 | 5.11E-15 | 5.11E-15 | 1.53E-14 | 8.95E-01 | 6.26E-10 | 2.09E-08 |
| 213.07144 | 55.23  | 20.06 | 20.24 | 20.08 | 19.86 | 3.03E-01 | 7.73E-01 | 9.99E-01 | 7.19E-01 | 8.42E-01 | 2.18E-01 | 6.64E-01 |
| 213.07785 | 289.52 | 17.65 | 16.80 | 16.75 | 16.97 | 8.72E-12 | 2.05E-09 | 1.76E-10 | 4.98E-06 | 9.85E-01 | 5.62E-01 | 3.47E-01 |
| 213.08586 | 44.84  | 19.28 | 20.35 | 21.36 | 20.87 | 6.24E-13 | 3.38E-04 | 4.09E-13 | 6.71E-08 | 1.18E-03 | 2.36E-01 | 2.88E-01 |
| 213.08932 | 282.75 | 22.50 | 20.68 | 20.81 | 20.68 | 5.53E-77 | 5.11E-15 | 5.11E-15 | 5.11E-15 | 2.72E-01 | 1.00E+00 | 3.24E-01 |
| 213.09754 | 287.88 | 17.01 | 15.40 | 16.09 | 15.84 | 2.90E-03 | 1.47E-03 | 1.45E-01 | 4.49E-02 | 4.02E-01 | 7.72E-01 | 9.45E-01 |
| 213.11334 | 245.78 | 19.20 | 17.56 | 17.46 | 17.69 | 6.25E-18 | 1.47E-13 | 4.51E-14 | 1.88E-11 | 9.70E-01 | 9.28E-01 | 7.17E-01 |
| 213.14963 | 283.45 | 18.60 | 18.19 | 18.07 | 18.35 | 4.74E-04 | 9.52E-03 | 2.91E-04 | 2.17E-01 | 7.97E-01 | 6.78E-01 | 1.84E-01 |
| 213.18605 | 249.4  | 19.60 | 18.05 | 17.75 | 18.23 | 1.08E-31 | 2.26E-14 | 5.11E-15 | 4.34E-14 | 1.49E-01 | 6.08E-01 | 5.91E-03 |
| 213.9247  | 52.57  | 16.82 | 16.29 | 17.53 | 17.35 | 2.70E-29 | 5.10E-07 | 8.11E-12 | 1.38E-06 | 5.33E-15 | 4.06E-14 | 2.36E-01 |
| 213.94486 | 26.64  | 14.88 | 15.15 | 15.87 | 14.87 | 2.72E-01 | 9.67E-01 | 2.95E-01 | 1.00E+00 | 5.93E-01 | 9.66E-01 | 3.28E-01 |
| 213.97713 | 26.78  | 15.33 | 15.71 | 15.34 | 14.94 | 6.24E-02 | 4.71E-01 | 1.00E+00 | 4.83E-01 | 5.24E-01 | 3.15E-02 | 4.67E-01 |
| 213.99866 | 22.58  | 15.93 | 15.16 | 15.47 | 15.90 | 2.08E-02 | 2.90E-02 | 3.31E-01 | 9.99E-01 | 6.94E-01 | 5.80E-02 | 4.48E-01 |
| 214.01831 | 27.89  | 12.76 | 13.39 | 13.92 | 12.71 | 2.96E-04 | 1.80E-01 | 1.03E-03 | 9.98E-01 | 3.21E-01 | 1.56E-01 | 1.12E-03 |
| 214.02427 | 36.82  | 16.88 | 16.19 | 16.12 | 15.94 | 3.26E-02 | 1.66E-01 | 1.02E-01 | 3.33E-02 | 9.97E-01 | 8.95E-01 | 9.56E-01 |
| 214.03253 | 158.88 | 13.71 | 13.76 | 14.32 | 13.75 | 5.53E-02 | 9.97E-01 | 6.73E-02 | 9.98E-01 | 1.29E-01 | 1.00E+00 | 1.38E-01 |
| 214.03383 | 25.69  | 18.08 | 18.94 | 18.98 | 18.38 | 1.29E-10 | 4.64E-08 | 6.74E-09 | 1.70E-01 | 9.91E-01 | 1.59E-03 | 4.83E-04 |
| 214.04906 | 22.97  | 23.57 | 24.15 | 24.09 | 23.90 | 1.09E-08 | 3.60E-08 | 9.00E-07 | 4.90E-03 | 9.10E-01 | 6.88E-02 | 2.60E-01 |
| 214.07344 | 291.42 | 20.07 | 17.97 | 18.28 | 18.07 | 2.12E-53 | 5.11E-15 | 5.11E-15 | 5.11E-15 | 3.52E-02 | 8.36E-01 | 2.72E-01 |
| 214.083   | 56.77  | 20.41 | 21.85 | 22.52 | 21.78 | 1.05E-16 | 5.07E-09 | 4.24E-14 | 6.75E-08 | 2.10E-02 | 9.90E-01 | 1.02E-02 |
| 214.08916 | 52.91  | 15.09 | 15.98 | 16.56 | 16.33 | 4.89E-08 | 2.40E-03 | 5.45E-08 | 1.26E-05 | 1.02E-01 | 5.33E-01 | 8.15E-01 |
| 214.09292 | 293.58 | 17.96 | 17.13 | 16.99 | 16.98 | 2.60E-11 | 4.07E-07 | 1.87E-09 | 5.23E-09 | 7.90E-01 | 7.83E-01 | 1.00E+00 |
| 214.10301 | 138.31 | 15.06 | 16.48 | 16.69 | 16.06 | 1.49E-19 | 6.31E-14 | 4.40E-14 | 1.34E-07 | 6.11E-01 | 7.83E-02 | 2.01E-03 |
| 214.10985 | 287.23 | 18.29 | 16.76 | 16.67 | 16.77 | 8.33E-37 | 5.11E-15 | 5.11E-15 | 5.77E-15 | 8.84E-01 | 1.00E+00 | 8.44E-01 |
| 214.11664 | 177.54 | 16.58 | 15.29 | 15.63 | 15.87 | 2.38E-22 | 2.31E-14 | 9.35E-14 | 5.36E-08 | 2.51E-02 | 2.01E-05 | 1.78E-01 |
| 214.14502 | 158.44 | 16.75 | 16.22 | 16.52 | 16.40 | 4.72E-03 | 2.12E-03 | 3.83E-01 | 9.79E-02 | 1.95E-01 | 6.45E-01 | 8.73E-01 |
| 214.15308 | 185.85 | 16.79 | 15.64 | 15.72 | 16.28 | 1.68E-10 | 3.42E-09 | 2.36E-08 | 2.67E-02 | 9.78E-01 | 4.33E-03 | 1.39E-02 |
| 214.18945 | 197.98 | 17.27 | 15.24 | 15.19 | 16.01 | 1.22E-23 | 4.31E-14 | 3.70E-14 | 1.87E-08 | 9.94E-01 | 1.69E-03 | 6.07E-04 |
| 214.87156 | 88.97  | 16.02 | 15.75 | 15.88 | 15.98 | 4.76E-02 | 4.05E-02 | 5.37E-01 | 9.86E-01 | 5.57E-01 | 1.28E-01 | 7.86E-01 |
| 214.88459 | 25.87  | 15.70 | 16.07 | 15.64 | 16.51 | 8.11E-03 | 4.88E-01 | 9.97E-01 | 1.70E-02 | 3.93E-01 | 4.11E-01 | 1.16E-02 |
| 214.89206 | 97.1   | 9.41  | 12.87 | 13.83 | 13.63 | 3.13E-15 | 1.01E-08 | 2.69E-13 | 1.09E-11 | 3.25E-01 | 5.59E-01 | 9.86E-01 |
| 214.92126 | 37.31  | 19.44 | 18.99 | 20.16 | 20.02 | 1.59E-14 | 9.36E-03 | 5.07E-06 | 6.47E-04 | 4.02E-13 | 4.88E-10 | 7.83E-01 |

|           |        |       |       |       |       |          |          |          |          |          |          |          |
|-----------|--------|-------|-------|-------|-------|----------|----------|----------|----------|----------|----------|----------|
| 214.9343  | 31.53  | 16.45 | 17.29 | 17.44 | 17.11 | 5.33E-25 | 4.19E-14 | 1.31E-14 | 1.41E-11 | 3.15E-01 | 2.03E-01 | 1.74E-03 |
| 214.95504 | 168.3  | 14.70 | 14.28 | 14.42 | 15.35 | 9.77E-07 | 1.17E-01 | 4.60E-01 | 4.81E-03 | 8.68E-01 | 1.01E-06 | 2.73E-05 |
| 214.97097 | 28.63  | 14.87 | 15.20 | 15.05 | 15.04 | 5.22E-01 | 4.33E-01 | 8.39E-01 | 8.68E-01 | 9.08E-01 | 9.03E-01 | 1.00E+00 |
| 214.99664 | 82.9   | 11.11 | 12.88 | 13.78 | 14.95 | 5.59E-11 | 3.54E-03 | 1.82E-06 | 2.49E-11 | 3.09E-01 | 8.78E-04 | 1.28E-01 |
| 215.02317 | 286.04 | 20.44 | 21.04 | 20.66 | 21.22 | 4.71E-12 | 2.40E-07 | 1.58E-01 | 4.71E-11 | 2.71E-03 | 3.59E-01 | 4.18E-06 |
| 215.0331  | 22.57  | 25.26 | 25.90 | 25.64 | 25.79 | 5.72E-07 | 5.24E-07 | 7.20E-03 | 7.97E-05 | 1.09E-01 | 7.95E-01 | 5.73E-01 |
| 215.04425 | 66.8   | 15.31 | 15.85 | 17.31 | 17.42 | 1.47E-12 | 3.03E-01 | 2.40E-09 | 1.17E-09 | 3.39E-05 | 1.43E-05 | 9.86E-01 |
| 215.05699 | 198.92 | 17.25 | 13.08 | 13.06 | 13.54 | 3.35E-16 | 5.68E-13 | 3.14E-13 | 3.23E-10 | 1.00E+00 | 8.36E-01 | 8.19E-01 |
| 215.05748 | 289.09 | 16.77 | 16.67 | 16.64 | 16.51 | 5.23E-01 | 9.30E-01 | 8.66E-01 | 4.34E-01 | 9.99E-01 | 8.09E-01 | 8.78E-01 |
| 215.06841 | 291.47 | 18.14 | 16.82 | 16.60 | 16.98 | 7.33E-35 | 7.11E-15 | 5.11E-15 | 4.13E-14 | 1.89E-01 | 5.04E-01 | 5.02E-03 |
| 215.08636 | 54.03  | 16.25 | 17.36 | 17.98 | 17.50 | 1.53E-15 | 1.96E-07 | 4.31E-14 | 9.66E-09 | 1.06E-02 | 8.99E-01 | 8.97E-02 |
| 215.09304 | 180.74 | 18.38 | 18.28 | 18.23 | 17.72 | 5.97E-04 | 9.15E-01 | 7.67E-01 | 4.11E-04 | 9.90E-01 | 5.73E-03 | 1.34E-02 |
| 215.09324 | 286.38 | 17.40 | 16.85 | 16.89 | 17.05 | 7.16E-04 | 1.24E-03 | 2.64E-03 | 8.88E-02 | 9.95E-01 | 5.81E-01 | 7.20E-01 |
| 215.10518 | 291.66 | 17.78 | 16.53 | 16.63 | 16.72 | 2.64E-16 | 9.45E-14 | 2.28E-12 | 3.13E-10 | 9.09E-01 | 6.36E-01 | 9.47E-01 |
| 215.12898 | 288.91 | 17.95 | 17.79 | 17.70 | 18.17 | 1.74E-03 | 5.52E-01 | 1.42E-01 | 2.95E-01 | 8.59E-01 | 1.76E-02 | 1.24E-03 |
| 215.16538 | 182.94 | 18.90 | 17.75 | 17.99 | 18.39 | 2.51E-23 | 2.35E-14 | 4.45E-14 | 1.68E-05 | 1.12E-01 | 8.64E-08 | 1.34E-03 |
| 216.03157 | 30.28  | 18.88 | 17.94 | 18.40 | 18.21 | 4.76E-08 | 1.50E-08 | 8.64E-03 | 1.40E-04 | 1.62E-02 | 3.28E-01 | 6.23E-01 |
| 216.03665 | 18.2   | 21.11 | 21.69 | 21.32 | 21.49 | 4.97E-05 | 1.96E-05 | 3.18E-01 | 1.68E-02 | 1.53E-02 | 3.67E-01 | 5.65E-01 |
| 216.05257 | 21.36  | 16.97 | 16.92 | 16.87 | 17.10 | 1.98E-01 | 9.49E-01 | 7.51E-01 | 6.49E-01 | 9.72E-01 | 3.54E-01 | 1.60E-01 |
| 216.05278 | 291.08 | 17.07 | 16.93 | 16.86 | 16.54 | 3.09E-02 | 8.41E-01 | 6.20E-01 | 1.64E-02 | 9.83E-01 | 1.49E-01 | 2.84E-01 |
| 216.07827 | 210.39 | 15.08 | 9.52  | 9.20  | 9.60  | 8.63E-62 | 5.11E-15 | 5.11E-15 | 5.11E-15 | 6.89E-01 | 9.91E-01 | 5.17E-01 |
| 216.08908 | 284.42 | 19.64 | 18.13 | 18.37 | 18.10 | 3.59E-32 | 5.77E-15 | 3.70E-14 | 5.77E-15 | 2.03E-01 | 9.96E-01 | 1.42E-01 |
| 216.16906 | 100.43 | 15.31 | 15.01 | 13.77 | 14.45 | 1.37E-13 | 4.14E-01 | 2.54E-13 | 1.23E-04 | 6.75E-09 | 3.11E-02 | 4.15E-03 |
| 216.89816 | 80.12  | 16.70 | 17.67 | 17.84 | 17.94 | 1.33E-30 | 4.33E-14 | 1.02E-14 | 5.77E-15 | 3.09E-01 | 4.38E-02 | 7.66E-01 |
| 216.91911 | 113.13 | 15.64 | 15.61 | 15.74 | 16.12 | 1.19E-05 | 9.96E-01 | 7.24E-01 | 4.63E-05 | 6.07E-01 | 3.16E-05 | 3.11E-03 |
| 216.92897 | 23.72  | 18.13 | 18.99 | 19.07 | 19.32 | 9.40E-15 | 2.23E-08 | 5.96E-10 | 1.09E-13 | 9.39E-01 | 1.14E-01 | 3.23E-01 |
| 216.9707  | 162.91 | 14.88 | 14.95 | 14.70 | 15.80 | 1.62E-06 | 9.85E-01 | 7.89E-01 | 5.94E-05 | 5.96E-01 | 3.94E-04 | 1.56E-06 |
| 216.97905 | 19.28  | 15.06 | 13.99 | 14.68 | 15.19 | 8.78E-03 | 1.98E-02 | 7.18E-01 | 9.83E-01 | 2.56E-01 | 1.07E-02 | 5.29E-01 |
| 217.00315 | 201.41 | 18.87 | 17.36 | 17.43 | 16.59 | 1.06E-16 | 6.04E-09 | 2.09E-08 | 4.37E-14 | 9.92E-01 | 1.18E-02 | 4.50E-03 |
| 217.01239 | 61.85  | 17.26 | 17.67 | 18.76 | 18.53 | 2.31E-14 | 1.48E-01 | 1.02E-12 | 5.62E-09 | 4.82E-07 | 2.20E-04 | 6.43E-01 |
| 217.03029 | 21.6   | 23.64 | 24.24 | 23.89 | 24.04 | 2.48E-05 | 9.24E-06 | 1.62E-01 | 6.73E-03 | 2.68E-02 | 4.41E-01 | 6.03E-01 |
| 217.03672 | 22.49  | 17.90 | 18.34 | 18.19 | 18.09 | 8.04E-03 | 3.90E-03 | 1.16E-01 | 5.07E-01 | 6.31E-01 | 2.29E-01 | 8.74E-01 |
| 217.04899 | 22.82  | 17.23 | 17.30 | 17.02 | 17.55 | 1.28E-02 | 9.67E-01 | 4.80E-01 | 1.82E-01 | 2.55E-01 | 4.22E-01 | 5.34E-03 |
| 217.05548 | 17.16  | 16.88 | 16.27 | 15.91 | 15.95 | 2.24E-06 | 1.09E-02 | 6.08E-06 | 3.96E-05 | 2.66E-01 | 4.22E-01 | 9.95E-01 |
| 217.0731  | 289.21 | 17.47 | 16.71 | 16.90 | 16.78 | 1.50E-09 | 8.47E-09 | 2.09E-05 | 4.64E-07 | 3.94E-01 | 9.37E-01 | 7.79E-01 |
| 217.08353 | 19.26  | 17.70 | 17.99 | 18.25 | 18.44 | 6.24E-07 | 1.17E-01 | 1.69E-04 | 6.36E-07 | 2.08E-01 | 7.76E-03 | 5.34E-01 |
| 217.08439 | 289.31 | 17.51 | 16.41 | 16.68 | 16.26 | 4.04E-10 | 8.35E-08 | 6.31E-05 | 2.86E-09 | 4.99E-01 | 8.75E-01 | 1.48E-01 |
| 217.09273 | 209.53 | 15.28 | 8.96  | 9.65  | 9.82  | 1.56E-30 | 5.77E-15 | 2.20E-14 | 3.89E-14 | 5.43E-01 | 3.77E-01 | 9.89E-01 |
| 217.10917 | 203.59 | 17.35 | 16.92 | 16.79 | 16.55 | 4.82E-08 | 4.21E-03 | 7.56E-05 | 1.89E-08 | 7.57E-01 | 3.07E-02 | 2.62E-01 |
| 217.11984 | 22.26  | 16.76 | 17.03 | 17.18 | 17.26 | 2.57E-08 | 5.88E-03 | 2.81E-06 | 6.50E-08 | 2.80E-01 | 4.39E-02 | 7.98E-01 |
| 217.47588 | 18.11  | 13.35 | 15.35 | 17.46 | 17.33 | 2.79E-31 | 2.45E-08 | 5.33E-15 | 7.99E-15 | 7.48E-09 | 1.52E-07 | 9.84E-01 |
| 217.5816  | 66.1   | 14.04 | 15.27 | 12.34 | 12.93 | 2.47E-61 | 4.26E-14 | 5.11E-15 | 5.02E-14 | 5.11E-15 | 5.11E-15 | 5.90E-05 |
| 218.00886 | 70.09  | 13.90 | 14.71 | 14.96 | 14.98 | 2.07E-08 | 1.67E-04 | 3.01E-07 | 5.00E-07 | 5.68E-01 | 5.36E-01 | 1.00E+00 |
| 218.03521 | 20.66  | 19.68 | 20.81 | 20.52 | 20.41 | 2.11E-26 | 5.77E-15 | 4.41E-14 | 1.23E-12 | 1.10E-02 | 3.49E-04 | 7.01E-01 |
| 218.06732 | 192.3  | 20.62 | 21.30 | 21.07 | 21.85 | 1.82E-06 | 9.25E-03 | 1.49E-01 | 3.82E-07 | 7.21E-01 | 7.31E-02 | 3.34E-03 |

|           |        |       |       |       |       |          |          |          |          |          |          |          |
|-----------|--------|-------|-------|-------|-------|----------|----------|----------|----------|----------|----------|----------|
| 218.0939  | 209.18 | 13.93 | 10.75 | 11.26 | 8.99  | 4.94E-08 | 2.82E-04 | 3.00E-03 | 1.16E-08 | 9.15E-01 | 1.36E-01 | 2.68E-02 |
| 218.10396 | 17.47  | 21.83 | 22.12 | 22.17 | 22.39 | 5.66E-04 | 1.20E-01 | 3.92E-02 | 1.83E-04 | 9.75E-01 | 1.81E-01 | 3.63E-01 |
| 218.87783 | 74.76  | 15.94 | 17.35 | 18.02 | 17.23 | 3.33E-47 | 5.11E-15 | 5.11E-15 | 1.53E-14 | 5.19E-08 | 7.38E-01 | 3.98E-10 |
| 218.8873  | 77.95  | 16.00 | 15.71 | 16.11 | 16.47 | 5.17E-13 | 4.67E-03 | 6.11E-01 | 1.74E-06 | 6.32E-05 | 8.95E-14 | 4.43E-04 |
| 218.95022 | 36.14  | 21.11 | 22.09 | 21.75 | 21.68 | 1.17E-05 | 3.19E-06 | 4.35E-03 | 1.90E-02 | 2.97E-01 | 1.77E-01 | 9.86E-01 |
| 218.96358 | 145.7  | 16.31 | 14.74 | 15.41 | 15.88 | 8.12E-15 | 4.55E-14 | 5.35E-06 | 9.19E-02 | 1.72E-03 | 4.31E-08 | 6.40E-02 |
| 218.98595 | 164.05 | 14.97 | 15.06 | 14.83 | 15.10 | 4.66E-01 | 9.65E-01 | 8.43E-01 | 8.90E-01 | 5.88E-01 | 9.94E-01 | 4.48E-01 |
| 218.99445 | 31.8   | 17.37 | 14.38 | 13.96 | 15.84 | 1.55E-14 | 1.34E-10 | 2.52E-13 | 3.02E-03 | 7.69E-01 | 6.76E-03 | 1.91E-04 |
| 219.01507 | 26.12  | 21.89 | 21.28 | 21.53 | 21.78 | 2.89E-05 | 2.76E-05 | 2.58E-02 | 8.45E-01 | 2.52E-01 | 1.82E-03 | 2.40E-01 |
| 219.0365  | 22.22  | 18.56 | 17.80 | 17.46 | 17.82 | 3.31E-18 | 6.00E-10 | 4.20E-14 | 4.11E-09 | 1.72E-02 | 9.98E-01 | 1.30E-02 |
| 219.04681 | 21.75  | 19.05 | 19.11 | 19.03 | 18.93 | 5.78E-01 | 9.62E-01 | 1.00E+00 | 7.70E-01 | 9.39E-01 | 5.02E-01 | 8.32E-01 |
| 219.0519  | 167.06 | 15.69 | 15.64 | 15.52 | 15.47 | 2.19E-01 | 9.75E-01 | 4.27E-01 | 2.55E-01 | 7.11E-01 | 5.02E-01 | 9.82E-01 |
| 219.07077 | 20.88  | 16.48 | 14.89 | 14.29 | 15.24 | 1.69E-41 | 5.77E-15 | 5.11E-15 | 4.40E-14 | 5.07E-05 | 5.24E-02 | 1.47E-10 |
| 219.08875 | 288.41 | 17.53 | 16.31 | 16.70 | 16.41 | 6.84E-14 | 1.18E-12 | 1.01E-06 | 1.51E-10 | 7.26E-02 | 9.34E-01 | 2.84E-01 |
| 219.10236 | 169.44 | 16.05 | 14.94 | 15.36 | 15.49 | 4.32E-11 | 5.38E-12 | 1.86E-05 | 1.42E-03 | 2.87E-02 | 2.42E-03 | 8.16E-01 |
| 219.10752 | 20.23  | 18.02 | 18.15 | 18.24 | 18.49 | 2.66E-02 | 7.97E-01 | 4.30E-01 | 1.38E-02 | 9.40E-01 | 1.58E-01 | 4.09E-01 |
| 219.13928 | 184.29 | 16.24 | 15.75 | 15.94 | 15.70 | 2.67E-04 | 1.33E-03 | 1.06E-01 | 5.59E-04 | 4.68E-01 | 9.89E-01 | 3.08E-01 |
| 219.17573 | 218.14 | 16.33 | 16.57 | 16.52 | 16.41 | 2.44E-01 | 2.33E-01 | 4.61E-01 | 9.35E-01 | 9.72E-01 | 6.14E-01 | 8.51E-01 |
| 219.95359 | 34.26  | 14.99 | 16.31 | 16.29 | 16.10 | 4.67E-09 | 1.35E-07 | 1.64E-07 | 1.89E-05 | 1.00E+00 | 8.31E-01 | 8.68E-01 |
| 219.979   | 22.92  | 16.78 | 17.42 | 17.56 | 17.25 | 8.44E-07 | 7.09E-05 | 8.08E-07 | 7.93E-03 | 8.04E-01 | 6.83E-01 | 1.91E-01 |
| 219.99022 | 21.85  | 14.03 | 11.29 | 14.79 | 16.13 | 2.03E-30 | 1.67E-13 | 1.00E-01 | 2.67E-08 | 4.16E-14 | 5.11E-15 | 1.02E-03 |
| 220.01842 | 30.09  | 17.58 | 16.78 | 17.08 | 17.31 | 2.46E-06 | 8.95E-07 | 3.85E-03 | 2.76E-01 | 1.99E-01 | 4.50E-03 | 4.43E-01 |
| 220.02812 | 76.74  | 10.53 | 14.55 | 14.45 | 15.32 | 6.68E-29 | 4.04E-14 | 4.06E-14 | 6.88E-15 | 9.96E-01 | 2.31E-01 | 1.43E-01 |
| 220.03319 | 21.43  | 17.13 | 18.73 | 18.47 | 18.43 | 1.57E-40 | 5.11E-15 | 5.11E-15 | 5.77E-15 | 7.49E-02 | 2.83E-02 | 9.68E-01 |
| 220.0501  | 18.24  | 24.02 | 24.21 | 24.14 | 23.96 | 3.12E-01 | 5.34E-01 | 8.37E-01 | 9.68E-01 | 9.57E-01 | 3.15E-01 | 6.03E-01 |
| 220.07344 | 207.24 | 16.48 | 13.67 | 14.03 | 14.48 | 3.39E-19 | 4.42E-14 | 7.28E-14 | 1.36E-09 | 6.07E-01 | 4.36E-02 | 4.63E-01 |
| 220.08275 | 273.04 | 20.92 | 20.68 | 20.42 | 20.82 | 6.78E-02 | 5.86E-01 | 4.88E-02 | 9.55E-01 | 5.75E-01 | 8.99E-01 | 2.09E-01 |
| 220.09249 | 175.86 | 13.84 | 13.62 | 15.05 | 11.17 | 1.64E-09 | 9.76E-01 | 1.04E-01 | 1.31E-05 | 4.53E-02 | 1.27E-04 | 2.62E-10 |
| 220.14697 | 291.2  | 16.62 | 16.90 | 16.84 | 17.08 | 2.30E-02 | 2.11E-01 | 4.04E-01 | 1.14E-02 | 9.79E-01 | 6.44E-01 | 3.97E-01 |
| 220.14714 | 200.03 | 16.84 | 15.53 | 15.51 | 15.47 | 9.70E-16 | 1.11E-11 | 3.65E-12 | 5.37E-12 | 1.00E+00 | 9.90E-01 | 9.97E-01 |
| 220.85261 | 20.06  | 15.00 | 11.92 | 11.08 | 12.53 | 5.14E-12 | 6.82E-08 | 4.69E-12 | 3.57E-05 | 3.94E-01 | 6.81E-01 | 4.13E-02 |
| 220.94478 | 155.89 | 16.65 | 16.75 | 16.87 | 17.55 | 2.45E-04 | 9.68E-01 | 7.08E-01 | 2.16E-04 | 9.34E-01 | 1.76E-03 | 1.11E-02 |
| 220.96586 | 37.27  | 22.16 | 23.63 | 23.44 | 23.35 | 2.37E-25 | 2.09E-14 | 4.29E-14 | 4.52E-14 | 4.81E-01 | 1.96E-01 | 9.30E-01 |
| 221.01236 | 288.98 | 10.40 | 19.35 | 19.29 | 11.75 | 5.32E-92 | 5.11E-15 | 5.11E-15 | 2.60E-04 | 9.98E-01 | 5.11E-15 | 5.11E-15 |
| 221.02151 | 31.31  | 15.78 | 15.14 | 14.66 | 15.25 | 1.42E-05 | 1.85E-02 | 2.58E-06 | 8.65E-02 | 1.35E-01 | 9.61E-01 | 4.70E-02 |
| 221.03932 | 93.13  | 14.84 | 14.49 | 14.92 | 15.47 | 1.58E-02 | 6.14E-01 | 9.90E-01 | 1.36E-01 | 4.41E-01 | 6.92E-03 | 2.62E-01 |
| 221.04843 | 23.56  | 16.13 | 16.70 | 15.76 | 16.59 | 3.67E-02 | 3.47E-01 | 7.17E-01 | 5.67E-01 | 4.23E-02 | 9.89E-01 | 1.08E-01 |
| 221.0533  | 19.07  | 27.60 | 28.12 | 27.87 | 27.81 | 4.43E-03 | 1.56E-03 | 1.99E-01 | 4.81E-01 | 3.25E-01 | 1.53E-01 | 9.66E-01 |
| 221.06705 | 201.82 | 18.42 | 16.96 | 16.54 | 16.92 | 4.89E-27 | 4.44E-14 | 6.22E-15 | 4.31E-14 | 3.86E-02 | 9.94E-01 | 8.89E-02 |
| 221.06709 | 288.04 | 17.05 | 16.86 | 16.84 | 17.06 | 2.90E-01 | 5.68E-01 | 4.84E-01 | 9.99E-01 | 9.99E-01 | 5.32E-01 | 4.54E-01 |
| 221.07724 | 184.06 | 19.09 | 18.65 | 18.29 | 18.54 | 1.42E-02 | 2.93E-01 | 6.98E-03 | 1.43E-01 | 4.78E-01 | 9.77E-01 | 7.56E-01 |
| 221.07741 | 19.63  | 17.87 | 16.55 | 16.36 | 16.77 | 1.34E-35 | 5.33E-15 | 5.11E-15 | 4.02E-14 | 2.94E-01 | 2.01E-01 | 1.48E-03 |
| 221.08234 | 284.52 | 18.63 | 17.57 | 17.76 | 17.65 | 1.58E-17 | 4.53E-14 | 2.92E-11 | 7.77E-13 | 4.47E-01 | 9.30E-01 | 8.36E-01 |
| 221.08624 | 174.03 | 19.15 | 18.13 | 18.13 | 18.40 | 1.23E-21 | 4.10E-14 | 4.33E-14 | 1.66E-10 | 1.00E+00 | 8.19E-02 | 7.02E-02 |
| 221.11851 | 292.09 | 17.33 | 17.19 | 17.28 | 17.21 | 6.00E-01 | 6.09E-01 | 9.73E-01 | 7.33E-01 | 8.62E-01 | 9.98E-01 | 9.32E-01 |

|           |        |       |       |       |       |          |          |          |          |          |          |          |
|-----------|--------|-------|-------|-------|-------|----------|----------|----------|----------|----------|----------|----------|
| 221.15479 | 286.23 | 18.00 | 18.22 | 18.24 | 18.35 | 1.59E-02 | 1.81E-01 | 1.32E-01 | 9.23E-03 | 9.99E-01 | 6.50E-01 | 7.21E-01 |
| 221.89082 | 93.73  | 15.46 | 14.53 | 13.87 | 14.19 | 4.07E-05 | 3.34E-02 | 2.50E-05 | 1.94E-03 | 2.33E-01 | 7.83E-01 | 8.04E-01 |
| 221.96912 | 41.31  | 16.70 | 18.11 | 17.87 | 17.81 | 1.58E-25 | 1.55E-14 | 4.33E-14 | 4.41E-14 | 2.30E-01 | 1.02E-01 | 9.68E-01 |
| 221.97566 | 20.52  | 19.18 | 20.34 | 20.07 | 20.03 | 4.74E-34 | 5.11E-15 | 2.51E-14 | 4.15E-14 | 5.64E-03 | 1.73E-03 | 9.69E-01 |
| 221.9848  | 21.4   | 22.95 | 24.72 | 24.72 | 24.41 | 1.38E-44 | 5.11E-15 | 5.11E-15 | 5.33E-15 | 1.00E+00 | 4.53E-02 | 4.42E-02 |
| 221.99999 | 27.61  | 17.38 | 17.77 | 18.27 | 17.09 | 1.17E-11 | 5.54E-02 | 8.12E-08 | 2.67E-01 | 7.72E-03 | 2.40E-04 | 2.03E-11 |
| 222.03071 | 27.7   | 16.54 | 14.16 | 14.86 | 15.45 | 3.16E-15 | 4.22E-14 | 7.42E-09 | 5.88E-04 | 5.51E-02 | 4.62E-05 | 1.47E-01 |
| 222.04931 | 22.59  | 22.49 | 22.66 | 22.48 | 22.68 | 1.29E-01 | 3.55E-01 | 1.00E+00 | 3.08E-01 | 3.30E-01 | 9.99E-01 | 2.86E-01 |
| 222.05388 | 22.26  | 16.64 | 16.70 | 16.53 | 16.33 | 2.28E-02 | 9.72E-01 | 7.46E-01 | 5.37E-02 | 4.97E-01 | 2.09E-02 | 4.04E-01 |
| 222.05919 | 20.1   | 18.05 | 18.11 | 18.03 | 17.76 | 2.29E-01 | 9.88E-01 | 9.99E-01 | 3.39E-01 | 9.73E-01 | 2.14E-01 | 4.18E-01 |
| 222.07706 | 21.91  | 17.49 | 17.38 | 17.42 | 17.32 | 6.61E-01 | 8.63E-01 | 9.55E-01 | 6.00E-01 | 9.94E-01 | 9.66E-01 | 8.85E-01 |
| 222.07857 | 289.93 | 18.56 | 16.66 | 16.68 | 16.51 | 4.26E-12 | 6.13E-09 | 6.52E-09 | 9.34E-10 | 1.00E+00 | 9.62E-01 | 9.45E-01 |
| 222.0894  | 153.8  | 16.22 | 14.75 | 15.08 | 14.86 | 4.86E-16 | 7.39E-14 | 2.03E-09 | 6.31E-12 | 2.49E-01 | 9.26E-01 | 6.34E-01 |
| 222.09855 | 290.15 | 17.27 | 16.45 | 16.15 | 16.86 | 4.02E-09 | 2.72E-05 | 3.21E-09 | 1.04E-01 | 3.24E-01 | 1.18E-01 | 7.03E-04 |
| 222.1139  | 143.2  | 14.54 | 12.12 | 12.08 | 13.11 | 3.69E-19 | 4.40E-14 | 4.24E-14 | 2.98E-06 | 9.99E-01 | 3.41E-03 | 1.78E-03 |
| 222.15832 | 187.11 | 15.47 | 13.57 | 13.72 | 14.53 | 5.52E-11 | 7.88E-10 | 9.78E-09 | 7.07E-03 | 9.59E-01 | 7.81E-03 | 3.10E-02 |
| 222.91608 | 30.74  | 16.90 | 17.49 | 17.48 | 17.57 | 7.40E-07 | 5.04E-05 | 6.29E-05 | 6.07E-06 | 1.00E+00 | 9.41E-01 | 9.10E-01 |
| 222.92649 | 119    | 14.91 | 13.98 | 14.03 | 14.12 | 1.36E-11 | 6.62E-10 | 3.81E-09 | 4.12E-07 | 9.84E-01 | 7.53E-01 | 9.16E-01 |
| 222.93706 | 150.22 | 15.67 | 14.30 | 13.80 | 14.71 | 8.26E-15 | 6.53E-09 | 4.62E-14 | 1.26E-04 | 1.15E-01 | 2.69E-01 | 4.62E-04 |
| 222.94226 | 85.29  | 15.78 | 15.97 | 16.06 | 16.84 | 5.43E-13 | 4.59E-01 | 1.20E-01 | 4.19E-13 | 8.88E-01 | 5.24E-09 | 1.69E-07 |
| 222.9615  | 44.03  | 15.84 | 16.55 | 16.56 | 16.76 | 9.93E-24 | 5.01E-14 | 4.44E-14 | 2.73E-14 | 9.98E-01 | 6.86E-02 | 9.66E-02 |
| 222.97007 | 42.06  | 15.75 | 16.41 | 16.10 | 16.21 | 1.50E-04 | 5.63E-05 | 6.72E-02 | 1.18E-02 | 1.76E-01 | 5.74E-01 | 8.98E-01 |
| 222.98408 | 28.87  | 16.25 | 17.34 | 17.64 | 17.31 | 1.03E-35 | 1.40E-14 | 5.11E-15 | 3.02E-14 | 1.29E-02 | 9.86E-01 | 5.51E-03 |
| 222.98821 | 18.13  | 16.86 | 18.55 | 18.56 | 18.26 | 2.40E-42 | 5.11E-15 | 5.11E-15 | 6.00E-15 | 1.00E+00 | 6.44E-02 | 5.28E-02 |
| 223.02013 | 192.03 | 15.75 | 14.11 | 14.54 | 14.75 | 6.76E-07 | 3.06E-07 | 2.43E-04 | 5.22E-03 | 4.57E-01 | 1.59E-01 | 9.07E-01 |
| 223.02035 | 38.41  | 14.35 | 11.17 | 12.29 | 11.78 | 1.81E-04 | 1.38E-04 | 2.59E-02 | 4.28E-03 | 4.49E-01 | 8.64E-01 | 9.11E-01 |
| 223.02857 | 248.85 | 18.34 | 19.21 | 19.43 | 18.72 | 6.77E-10 | 2.39E-06 | 1.86E-09 | 1.22E-01 | 5.76E-01 | 2.83E-02 | 3.74E-04 |
| 223.03694 | 20.34  | 16.37 | 18.13 | 17.36 | 17.88 | 2.37E-07 | 3.33E-07 | 7.93E-03 | 2.51E-05 | 8.30E-02 | 8.79E-01 | 3.94E-01 |
| 223.05033 | 21.7   | 26.06 | 26.42 | 26.41 | 26.21 | 2.31E-02 | 3.88E-02 | 4.82E-02 | 7.21E-01 | 1.00E+00 | 4.24E-01 | 4.78E-01 |
| 223.05674 | 24.02  | 19.47 | 20.60 | 20.47 | 20.34 | 9.83E-18 | 4.29E-14 | 3.66E-13 | 8.96E-10 | 7.11E-01 | 1.76E-01 | 7.37E-01 |
| 223.07382 | 281.85 | 19.77 | 17.75 | 18.03 | 17.99 | 1.19E-48 | 5.11E-15 | 5.11E-15 | 5.11E-15 | 7.96E-02 | 2.13E-01 | 9.81E-01 |
| 223.08243 | 274.48 | 18.08 | 17.61 | 17.63 | 17.19 | 1.45E-10 | 4.76E-04 | 6.93E-04 | 1.16E-11 | 9.99E-01 | 3.63E-03 | 2.09E-03 |
| 223.09297 | 167.8  | 20.06 | 19.08 | 19.34 | 19.40 | 7.29E-06 | 3.96E-06 | 1.10E-03 | 4.97E-03 | 5.40E-01 | 3.92E-01 | 9.92E-01 |
| 223.09789 | 190.69 | 17.12 | 16.47 | 16.55 | 16.55 | 3.56E-07 | 1.90E-06 | 3.19E-05 | 7.52E-05 | 9.18E-01 | 9.13E-01 | 1.00E+00 |
| 223.10896 | 164.53 | 14.20 | 17.73 | 15.39 | 13.18 | 7.95E-32 | 1.98E-14 | 9.04E-04 | 9.04E-03 | 2.56E-11 | 5.11E-15 | 7.25E-10 |
| 223.10908 | 47     | 9.80  | 19.41 | 12.99 | 8.21  | 9.87E-60 | 5.11E-15 | 2.04E-09 | 9.24E-03 | 5.11E-15 | 5.11E-15 | 4.37E-14 |
| 223.13412 | 290.24 | 18.04 | 17.32 | 17.44 | 17.19 | 1.22E-10 | 9.47E-08 | 8.46E-06 | 6.86E-10 | 7.83E-01 | 7.37E-01 | 2.11E-01 |
| 223.17056 | 190.36 | 16.97 | 16.84 | 17.03 | 16.98 | 6.64E-01 | 8.41E-01 | 9.73E-01 | 1.00E+00 | 6.07E-01 | 8.35E-01 | 9.85E-01 |
| 223.90669 | 81.4   | 16.41 | 16.31 | 16.48 | 16.24 | 9.35E-04 | 3.42E-01 | 6.05E-01 | 3.55E-02 | 2.55E-02 | 7.14E-01 | 9.32E-04 |
| 223.96419 | 43.57  | 15.19 | 12.14 | 12.14 | 12.40 | 1.38E-12 | 4.37E-10 | 3.18E-10 | 2.90E-08 | 1.00E+00 | 9.43E-01 | 9.44E-01 |
| 223.97361 | 42.86  | 17.67 | 18.38 | 18.33 | 17.85 | 4.78E-04 | 1.94E-03 | 4.45E-03 | 7.95E-01 | 9.93E-01 | 5.46E-02 | 9.71E-02 |
| 223.98067 | 21.36  | 17.98 | 19.73 | 19.72 | 19.44 | 3.74E-47 | 5.11E-15 | 5.11E-15 | 5.11E-15 | 1.00E+00 | 4.09E-02 | 5.12E-02 |
| 223.98884 | 21.32  | 16.22 | 17.70 | 17.71 | 17.43 | 2.94E-37 | 5.11E-15 | 5.11E-15 | 2.64E-14 | 1.00E+00 | 8.40E-02 | 7.37E-02 |
| 223.99459 | 28.73  | 13.95 | 13.60 | 14.49 | 14.53 | 8.23E-02 | 8.26E-01 | 5.25E-01 | 4.92E-01 | 1.37E-01 | 1.29E-01 | 1.00E+00 |
| 224.01554 | 33.43  | 16.13 | 15.46 | 15.75 | 15.38 | 2.27E-05 | 2.61E-04 | 8.70E-02 | 5.47E-05 | 2.83E-01 | 9.66E-01 | 1.23E-01 |

|           |        |       |       |       |       |           |          |          |          |          |          |          |
|-----------|--------|-------|-------|-------|-------|-----------|----------|----------|----------|----------|----------|----------|
| 224.02405 | 18.48  | 14.62 | 15.68 | 15.74 | 15.54 | 8.63E-10  | 9.60E-08 | 1.43E-08 | 9.14E-06 | 9.91E-01 | 8.74E-01 | 7.20E-01 |
| 224.02783 | 25.92  | 14.99 | 11.46 | 12.47 | 13.82 | 2.01E-13  | 3.58E-13 | 1.35E-07 | 5.00E-02 | 1.13E-01 | 4.15E-06 | 1.80E-02 |
| 224.0318  | 152.54 | 12.40 | 14.31 | 14.50 | 14.12 | 1.75E-05  | 3.09E-04 | 4.62E-05 | 2.11E-03 | 9.77E-01 | 9.79E-01 | 8.58E-01 |
| 224.05653 | 22.32  | 16.77 | 16.23 | 16.26 | 16.39 | 1.50E-09  | 1.33E-08 | 9.90E-08 | 1.47E-04 | 9.74E-01 | 3.12E-01 | 5.46E-01 |
| 224.05769 | 289.4  | 16.97 | 16.17 | 15.92 | 15.39 | 7.28E-09  | 4.34E-03 | 5.39E-05 | 2.04E-09 | 7.06E-01 | 9.31E-03 | 1.40E-01 |
| 224.06906 | 290.18 | 16.50 | 15.64 | 15.68 | 15.87 | 2.12E-02  | 2.93E-02 | 4.14E-02 | 1.93E-01 | 9.99E-01 | 8.96E-01 | 9.43E-01 |
| 224.07894 | 78.59  | 13.28 | 10.02 | 13.36 | 13.45 | 1.19E-16  | 4.87E-13 | 9.98E-01 | 9.77E-01 | 4.53E-13 | 5.49E-13 | 9.96E-01 |
| 224.09431 | 287.07 | 19.49 | 17.49 | 17.11 | 17.58 | 1.13E-54  | 5.11E-15 | 5.11E-15 | 5.11E-15 | 1.22E-02 | 8.91E-01 | 1.37E-03 |
| 224.1125  | 52.25  | 13.81 | 15.66 | 11.96 | 12.56 | 5.36E-88  | 5.11E-15 | 5.11E-15 | 2.69E-14 | 5.11E-15 | 5.11E-15 | 3.67E-06 |
| 224.13767 | 138.73 | 14.78 | 11.11 | 13.84 | 13.84 | 2.33E-68  | 5.11E-15 | 9.67E-10 | 2.86E-09 | 5.11E-15 | 5.11E-15 | 1.00E+00 |
| 224.14075 | 33.19  | 14.04 | 22.45 | 12.05 | 12.61 | 2.71E-146 | 5.11E-15 | 7.33E-15 | 9.19E-14 | 5.11E-15 | 5.11E-15 | 7.83E-03 |
| 224.17393 | 173.96 | 11.63 | 8.29  | 12.73 | 11.77 | 7.04E-11  | 6.46E-07 | 2.61E-01 | 9.95E-01 | 7.06E-11 | 8.47E-07 | 4.38E-01 |
| 224.17406 | 82.3   | 13.21 | 8.50  | 12.88 | 12.75 | 4.97E-19  | 4.15E-14 | 9.11E-01 | 8.09E-01 | 6.36E-14 | 5.46E-13 | 9.95E-01 |
| 224.89541 | 164.83 | 10.36 | 18.32 | 18.65 | 17.17 | 3.30E-45  | 5.11E-15 | 5.11E-15 | 5.11E-15 | 9.22E-01 | 1.44E-01 | 3.04E-02 |
| 224.91312 | 29.14  | 15.20 | 15.52 | 15.56 | 15.51 | 2.39E-01  | 3.86E-01 | 2.57E-01 | 4.18E-01 | 9.96E-01 | 1.00E+00 | 9.95E-01 |
| 224.91838 | 55.77  | 13.86 | 17.93 | 11.92 | 12.56 | 6.84E-138 | 5.11E-15 | 5.11E-15 | 5.77E-15 | 5.11E-15 | 5.11E-15 | 4.73E-08 |
| 224.92425 | 66.2   | 17.38 | 18.81 | 16.87 | 16.95 | 1.82E-91  | 5.11E-15 | 4.57E-14 | 1.13E-10 | 5.11E-15 | 5.11E-15 | 5.39E-01 |
| 224.94821 | 104.21 | 14.08 | 14.05 | 14.77 | 14.71 | 7.01E-03  | 9.99E-01 | 4.28E-02 | 9.41E-02 | 3.71E-02 | 8.13E-02 | 9.96E-01 |
| 224.95774 | 57.58  | 16.40 | 15.05 | 15.66 | 16.06 | 6.13E-04  | 2.95E-04 | 1.03E-01 | 7.30E-01 | 2.64E-01 | 2.04E-02 | 6.55E-01 |
| 224.97896 | 43.12  | 17.74 | 12.86 | 15.43 | 16.57 | 7.75E-30  | 5.11E-15 | 2.97E-09 | 8.87E-03 | 1.46E-10 | 4.30E-14 | 1.40E-02 |
| 224.99991 | 35.53  | 19.30 | 19.28 | 20.47 | 20.15 | 2.28E-13  | 9.99E-01 | 2.77E-10 | 1.21E-05 | 3.97E-10 | 1.20E-05 | 2.88E-01 |
| 225.02467 | 33.43  | 15.38 | 13.56 | 15.12 | 15.13 | 1.91E-09  | 5.62E-09 | 8.04E-01 | 8.31E-01 | 1.06E-06 | 2.26E-06 | 1.00E+00 |
| 225.02541 | 144.09 | 14.75 | 12.75 | 15.80 | 14.44 | 5.90E-15  | 3.95E-08 | 8.47E-03 | 7.92E-01 | 4.27E-14 | 1.56E-05 | 6.31E-04 |
| 225.05382 | 32.84  | 19.50 | 19.63 | 19.53 | 19.40 | 4.31E-01  | 7.53E-01 | 9.95E-01 | 8.81E-01 | 8.82E-01 | 3.47E-01 | 7.74E-01 |
| 225.06207 | 24.14  | 23.35 | 23.94 | 23.82 | 23.69 | 3.98E-05  | 2.66E-05 | 1.40E-03 | 4.75E-02 | 7.54E-01 | 2.22E-01 | 7.67E-01 |
| 225.07762 | 174.16 | 15.90 | 13.67 | 14.72 | 15.00 | 2.36E-13  | 6.03E-14 | 5.49E-05 | 4.95E-03 | 6.22E-04 | 1.72E-05 | 7.52E-01 |
| 225.0896  | 274.82 | 21.77 | 20.26 | 20.45 | 20.32 | 3.00E-33  | 5.11E-15 | 1.73E-14 | 7.33E-15 | 3.55E-01 | 9.53E-01 | 7.05E-01 |
| 225.0997  | 22.76  | 12.05 | 13.07 | 15.37 | 15.20 | 6.44E-07  | 4.27E-01 | 6.69E-06 | 4.57E-05 | 4.85E-03 | 1.51E-02 | 9.95E-01 |
| 225.11353 | 214.69 | 18.70 | 7.78  | 14.96 | 18.17 | 3.60E-64  | 5.11E-15 | 4.00E-13 | 6.86E-01 | 5.11E-15 | 5.11E-15 | 2.89E-09 |
| 225.11975 | 73.17  | 12.73 | 20.35 | 11.13 | 11.15 | 1.88E-122 | 5.11E-15 | 2.20E-13 | 1.78E-12 | 5.11E-15 | 5.11E-15 | 1.00E+00 |
| 225.1246  | 253.84 | 18.43 | 26.61 | 22.85 | 15.94 | 6.79E-59  | 5.11E-15 | 4.15E-14 | 3.16E-06 | 1.26E-12 | 5.11E-15 | 5.11E-15 |
| 225.14385 | 28.87  | 17.57 | 18.99 | 17.08 | 17.16 | 4.75E-88  | 5.11E-15 | 1.41E-13 | 7.13E-10 | 5.11E-15 | 5.11E-15 | 6.49E-01 |
| 225.14962 | 198.95 | 19.08 | 15.61 | 18.45 | 18.42 | 2.68E-35  | 5.11E-15 | 3.74E-02 | 3.41E-02 | 9.55E-15 | 1.91E-14 | 9.99E-01 |
| 225.14971 | 289.43 | 17.04 | 15.05 | 16.94 | 16.70 | 3.00E-12  | 4.32E-11 | 9.84E-01 | 6.34E-01 | 7.65E-10 | 2.16E-07 | 8.41E-01 |
| 225.16687 | 67.07  | 12.83 | 17.10 | 10.66 | 11.33 | 1.17E-68  | 5.11E-15 | 5.17E-14 | 1.52E-07 | 5.11E-15 | 5.11E-15 | 5.90E-02 |
| 225.18616 | 268.22 | 18.76 | 17.70 | 17.44 | 17.92 | 3.55E-19  | 9.01E-13 | 4.44E-14 | 2.90E-08 | 2.01E-01 | 4.11E-01 | 3.28E-03 |
| 225.22256 | 153.25 | 16.20 | 11.45 | 14.35 | 15.04 | 4.48E-45  | 5.11E-15 | 4.14E-11 | 1.04E-04 | 2.71E-14 | 5.11E-15 | 5.33E-02 |
| 225.23564 | 57.43  | 15.92 | 17.36 | 15.15 | 15.37 | 6.64E-47  | 7.77E-15 | 4.09E-09 | 8.98E-05 | 5.11E-15 | 5.11E-15 | 2.89E-01 |
| 225.24754 | 65.74  | 17.22 | 18.62 | 16.68 | 16.77 | 1.77E-75  | 5.11E-15 | 3.26E-12 | 2.18E-08 | 5.11E-15 | 5.11E-15 | 6.05E-01 |
| 225.32368 | 67.21  | 16.02 | 17.54 | 15.26 | 15.47 | 5.14E-92  | 5.11E-15 | 1.27E-14 | 3.52E-13 | 5.11E-15 | 5.11E-15 | 1.28E-02 |
| 225.33165 | 64.79  | 8.61  | 17.94 | 8.02  | 8.24  | 1.85E-144 | 5.11E-15 | 3.14E-03 | 1.43E-01 | 5.11E-15 | 5.11E-15 | 6.19E-01 |
| 225.97338 | 41.65  | 15.65 | 13.21 | 14.71 | 14.31 | 1.18E-11  | 1.25E-12 | 1.40E-02 | 2.24E-04 | 2.44E-05 | 5.43E-03 | 6.01E-01 |
| 225.98679 | 27.62  | 16.77 | 17.61 | 17.13 | 17.27 | 1.06E-05  | 2.21E-06 | 1.04E-01 | 1.49E-02 | 2.03E-02 | 1.80E-01 | 8.56E-01 |
| 226.00291 | 32.51  | 14.27 | 13.20 | 15.30 | 14.87 | 9.31E-13  | 3.32E-04 | 4.69E-04 | 1.14E-01 | 7.40E-13 | 3.19E-08 | 3.82E-01 |
| 226.01276 | 21.01  | 16.95 | 17.20 | 17.19 | 17.79 | 7.36E-05  | 4.75E-01 | 4.98E-01 | 2.29E-05 | 1.00E+00 | 7.42E-03 | 5.80E-03 |

|           |        |       |       |       |       |          |          |          |          |          |          |          |
|-----------|--------|-------|-------|-------|-------|----------|----------|----------|----------|----------|----------|----------|
| 226.04898 | 17.97  | 13.78 | 7.75  | 10.78 | 13.13 | 2.20E-25 | 1.15E-14 | 1.06E-07 | 6.06E-01 | 1.84E-07 | 4.37E-14 | 1.33E-04 |
| 226.06532 | 27.92  | 19.33 | 19.90 | 19.81 | 19.63 | 2.11E-04 | 2.32E-04 | 2.23E-03 | 1.49E-01 | 9.27E-01 | 2.28E-01 | 5.49E-01 |
| 226.07351 | 290.15 | 18.59 | 17.11 | 17.14 | 17.23 | 1.20E-43 | 5.11E-15 | 5.11E-15 | 5.11E-15 | 9.83E-01 | 6.00E-01 | 8.07E-01 |
| 226.08381 | 70.49  | 15.31 | 13.32 | 14.14 | 14.79 | 1.49E-23 | 1.42E-14 | 4.47E-10 | 1.89E-02 | 3.45E-05 | 3.30E-13 | 2.21E-03 |
| 226.08435 | 290.48 | 19.13 | 17.42 | 17.49 | 17.36 | 1.85E-56 | 5.11E-15 | 5.11E-15 | 5.11E-15 | 8.60E-01 | 9.41E-01 | 5.37E-01 |
| 226.09287 | 290.31 | 18.11 | 15.00 | 16.49 | 16.69 | 1.71E-23 | 7.33E-15 | 8.23E-09 | 1.14E-06 | 2.90E-07 | 1.84E-08 | 8.90E-01 |
| 226.10991 | 288.49 | 18.30 | 16.70 | 16.65 | 16.91 | 7.24E-31 | 8.88E-15 | 5.77E-15 | 4.27E-14 | 9.83E-01 | 4.39E-01 | 2.44E-01 |
| 226.12099 | 271.96 | 15.75 | 18.17 | 16.09 | 16.26 | 4.95E-15 | 6.51E-14 | 6.37E-01 | 3.15E-01 | 7.34E-11 | 6.93E-09 | 9.42E-01 |
| 226.12794 | 257.35 | 13.98 | 18.57 | 19.91 | 9.01  | 1.10E-26 | 2.57E-06 | 5.65E-10 | 6.29E-07 | 4.39E-01 | 4.13E-14 | 9.55E-15 |
| 226.1452  | 153.63 | 14.86 | 8.40  | 14.54 | 14.52 | 9.45E-70 | 5.11E-15 | 6.36E-01 | 6.11E-01 | 5.11E-15 | 5.11E-15 | 1.00E+00 |
| 226.18951 | 174.09 | 17.93 | 14.85 | 16.02 | 16.38 | 2.98E-19 | 3.91E-14 | 1.80E-09 | 3.07E-06 | 8.00E-04 | 1.02E-05 | 6.42E-01 |
| 226.89201 | 104.55 | 17.28 | 15.33 | 16.23 | 16.86 | 5.20E-21 | 3.51E-14 | 1.28E-07 | 1.06E-01 | 1.48E-05 | 7.46E-13 | 6.81E-03 |
| 226.91105 | 42.48  | 17.07 | 16.30 | 17.49 | 16.45 | 6.56E-08 | 1.41E-03 | 1.82E-01 | 1.97E-02 | 3.50E-07 | 9.03E-01 | 1.83E-05 |
| 226.93674 | 53.29  | 19.18 | 17.28 | 19.03 | 19.06 | 1.88E-42 | 5.11E-15 | 5.62E-01 | 7.51E-01 | 5.11E-15 | 5.11E-15 | 9.94E-01 |
| 226.99666 | 24     | 25.85 | 25.94 | 25.98 | 26.39 | 2.42E-05 | 8.15E-01 | 6.01E-01 | 1.40E-05 | 9.86E-01 | 7.86E-04 | 2.38E-03 |
| 227.04138 | 276.37 | 19.55 | 18.91 | 19.16 | 19.48 | 2.81E-05 | 5.05E-05 | 2.76E-02 | 9.61E-01 | 3.06E-01 | 9.16E-04 | 1.33E-01 |
| 227.05677 | 169.9  | 15.24 | 12.20 | 13.72 | 13.60 | 6.53E-09 | 6.02E-10 | 3.87E-03 | 2.42E-03 | 5.78E-03 | 1.76E-02 | 9.95E-01 |
| 227.06641 | 31.32  | 16.53 | 16.84 | 16.65 | 16.61 | 2.58E-01 | 1.94E-01 | 8.71E-01 | 9.54E-01 | 6.21E-01 | 5.13E-01 | 9.97E-01 |
| 227.06854 | 291.04 | 18.21 | 16.38 | 16.88 | 15.84 | 1.75E-14 | 1.35E-09 | 1.17E-05 | 7.42E-14 | 2.88E-01 | 2.35E-01 | 1.93E-03 |
| 227.08691 | 269.69 | 16.87 | 17.07 | 16.87 | 16.70 | 2.94E-02 | 3.14E-01 | 1.00E+00 | 4.62E-01 | 3.19E-01 | 1.33E-02 | 4.93E-01 |
| 227.09303 | 290.11 | 16.73 | 16.11 | 16.61 | 16.54 | 4.02E-02 | 2.77E-02 | 9.39E-01 | 8.37E-01 | 1.29E-01 | 2.54E-01 | 9.93E-01 |
| 227.0932  | 169.01 | 17.05 | 17.08 | 17.40 | 17.10 | 2.74E-02 | 9.92E-01 | 2.87E-02 | 9.70E-01 | 7.38E-02 | 9.98E-01 | 1.24E-01 |
| 227.10506 | 281.52 | 19.94 | 17.75 | 18.06 | 18.23 | 1.90E-41 | 5.11E-15 | 5.11E-15 | 6.22E-15 | 1.39E-01 | 6.72E-03 | 6.28E-01 |
| 227.12933 | 286.16 | 18.17 | 19.13 | 18.04 | 17.85 | 3.85E-28 | 4.39E-14 | 5.12E-01 | 8.54E-03 | 3.33E-14 | 6.22E-15 | 2.62E-01 |
| 227.1402  | 152.61 | 15.16 | 13.84 | 13.85 | 14.85 | 1.65E-16 | 2.06E-12 | 2.23E-12 | 2.84E-01 | 1.00E+00 | 3.59E-07 | 4.27E-07 |
| 227.14052 | 22.78  | 16.85 | 12.05 | 12.14 | 13.76 | 1.03E-26 | 1.91E-14 | 2.20E-14 | 9.45E-11 | 9.97E-01 | 1.06E-03 | 1.99E-03 |
| 227.16541 | 268.92 | 18.11 | 17.65 | 17.51 | 17.83 | 1.83E-06 | 3.50E-04 | 1.14E-06 | 8.20E-02 | 6.19E-01 | 4.08E-01 | 3.25E-02 |
| 227.20181 | 230.16 | 26.33 | 24.12 | 24.37 | 25.02 | 8.19E-12 | 5.44E-11 | 3.90E-09 | 2.50E-04 | 8.60E-01 | 3.07E-02 | 1.82E-01 |
| 227.98394 | 27.55  | 13.46 | 15.31 | 14.94 | 14.80 | 5.39E-09 | 8.18E-09 | 4.16E-06 | 7.41E-05 | 6.01E-01 | 3.51E-01 | 9.69E-01 |
| 228.00031 | 20.73  | 21.88 | 21.78 | 21.77 | 22.25 | 3.54E-04 | 8.24E-01 | 7.79E-01 | 1.22E-02 | 1.00E+00 | 9.93E-04 | 6.66E-04 |
| 228.03401 | 20.97  | 15.14 | 16.94 | 14.05 | 14.36 | 2.42E-62 | 5.11E-15 | 4.53E-14 | 2.48E-08 | 5.11E-15 | 5.11E-15 | 7.50E-02 |
| 228.05276 | 291.33 | 15.90 | 16.67 | 16.56 | 14.87 | 2.80E-11 | 1.12E-02 | 3.76E-02 | 3.42E-04 | 9.73E-01 | 2.65E-10 | 2.12E-09 |
| 228.06469 | 28.17  | 21.25 | 23.71 | 23.77 | 22.83 | 1.26E-77 | 5.11E-15 | 5.11E-15 | 5.11E-15 | 9.36E-01 | 4.66E-14 | 4.24E-14 |
| 228.08174 | 24.45  | 17.14 | 17.86 | 18.40 | 17.70 | 1.01E-20 | 1.13E-08 | 2.60E-14 | 2.19E-05 | 4.34E-05 | 5.48E-01 | 1.26E-07 |
| 228.08912 | 286.33 | 19.22 | 17.74 | 17.99 | 17.77 | 7.54E-39 | 5.11E-15 | 6.22E-15 | 5.11E-15 | 8.67E-02 | 9.92E-01 | 1.85E-01 |
| 228.09956 | 20.02  | 16.10 | 16.14 | 15.96 | 15.73 | 2.23E-01 | 9.97E-01 | 9.01E-01 | 2.88E-01 | 8.21E-01 | 2.22E-01 | 6.96E-01 |
| 228.10043 | 289.46 | 17.91 | 15.87 | 16.34 | 15.73 | 7.54E-18 | 7.15E-14 | 2.36E-09 | 4.56E-14 | 2.28E-01 | 9.40E-01 | 7.32E-02 |
| 228.12455 | 160.93 | 16.71 | 16.79 | 16.88 | 17.02 | 6.65E-02 | 8.85E-01 | 4.21E-01 | 4.60E-02 | 8.67E-01 | 2.49E-01 | 6.77E-01 |
| 228.13227 | 179.61 | 16.26 | 17.17 | 15.84 | 15.57 | 5.24E-23 | 1.62E-09 | 1.43E-02 | 1.66E-05 | 4.35E-14 | 2.93E-14 | 2.55E-01 |
| 228.16075 | 154.65 | 16.48 | 16.26 | 16.46 | 16.26 | 1.97E-01 | 3.41E-01 | 9.99E-01 | 3.80E-01 | 4.45E-01 | 1.00E+00 | 4.83E-01 |
| 228.16898 | 160.46 | 16.05 | 14.89 | 14.88 | 15.54 | 2.15E-12 | 5.03E-10 | 1.83E-10 | 1.90E-02 | 1.00E+00 | 2.12E-03 | 1.30E-03 |
| 228.20512 | 291.67 | 19.49 | 18.36 | 18.43 | 18.78 | 4.80E-39 | 5.11E-15 | 5.11E-15 | 4.13E-14 | 8.26E-01 | 1.86E-06 | 6.88E-05 |
| 228.84812 | 93.09  | 16.18 | 16.74 | 16.92 | 16.84 | 2.90E-13 | 2.31E-07 | 2.85E-12 | 1.52E-09 | 2.36E-01 | 7.20E-01 | 8.62E-01 |
| 228.90329 | 30.47  | 16.27 | 16.41 | 16.62 | 16.10 | 1.95E-01 | 9.24E-01 | 4.29E-01 | 9.06E-01 | 8.24E-01 | 5.97E-01 | 1.56E-01 |
| 228.90813 | 43.04  | 15.38 | 14.12 | 15.14 | 14.18 | 3.71E-06 | 7.43E-05 | 8.21E-01 | 2.81E-04 | 2.77E-03 | 9.97E-01 | 7.36E-03 |

|           |        |       |       |       |       |          |          |          |          |          |          |          |
|-----------|--------|-------|-------|-------|-------|----------|----------|----------|----------|----------|----------|----------|
| 228.91623 | 69.5   | 17.48 | 17.40 | 18.68 | 18.50 | 2.93E-18 | 9.55E-01 | 1.84E-12 | 6.27E-09 | 3.56E-13 | 1.07E-09 | 6.90E-01 |
| 228.97616 | 70.83  | 14.18 | 12.07 | 13.62 | 15.37 | 7.30E-17 | 3.31E-09 | 3.03E-01 | 2.58E-03 | 3.10E-05 | 4.40E-14 | 3.60E-06 |
| 229.0005  | 24.25  | 19.23 | 19.12 | 19.13 | 19.45 | 3.98E-02 | 8.17E-01 | 8.44E-01 | 2.69E-01 | 1.00E+00 | 4.89E-02 | 5.40E-02 |
| 229.01236 | 20.19  | 22.23 | 23.64 | 23.67 | 23.50 | 2.92E-25 | 4.07E-14 | 3.49E-14 | 4.42E-14 | 9.96E-01 | 7.67E-01 | 6.29E-01 |
| 229.02361 | 30.82  | 18.21 | 17.65 | 17.78 | 17.35 | 4.41E-02 | 2.40E-01 | 4.57E-01 | 2.57E-02 | 9.76E-01 | 7.63E-01 | 5.09E-01 |
| 229.04878 | 22.14  | 19.01 | 19.07 | 18.96 | 18.66 | 6.54E-02 | 9.84E-01 | 9.84E-01 | 1.16E-01 | 8.96E-01 | 5.97E-02 | 2.51E-01 |
| 229.05986 | 50.21  | 19.20 | 19.24 | 21.22 | 21.05 | 3.90E-29 | 9.96E-01 | 3.71E-14 | 4.40E-14 | 4.20E-14 | 4.44E-14 | 8.33E-01 |
| 229.07245 | 194.17 | 17.32 | 16.90 | 16.95 | 16.44 | 3.63E-05 | 7.34E-02 | 1.33E-01 | 6.45E-06 | 9.93E-01 | 5.24E-02 | 2.39E-02 |
| 229.07291 | 290.17 | 16.63 | 16.67 | 16.72 | 16.56 | 8.24E-01 | 9.96E-01 | 9.47E-01 | 9.75E-01 | 9.89E-01 | 9.24E-01 | 7.86E-01 |
| 229.08418 | 289.77 | 19.65 | 17.75 | 18.13 | 17.90 | 9.73E-66 | 5.11E-15 | 5.11E-15 | 5.11E-15 | 7.78E-05 | 2.84E-01 | 5.55E-02 |
| 229.08422 | 93.07  | 16.06 | 13.70 | 14.68 | 15.31 | 1.31E-27 | 5.11E-15 | 3.82E-12 | 4.83E-04 | 1.71E-06 | 7.58E-14 | 5.95E-03 |
| 229.09284 | 210.25 | 15.35 | 9.28  | 9.95  | 10.32 | 1.67E-25 | 2.31E-14 | 4.33E-14 | 4.26E-14 | 6.25E-01 | 2.74E-01 | 9.17E-01 |
| 229.10855 | 172.56 | 17.20 | 17.36 | 17.38 | 17.11 | 5.15E-02 | 4.65E-01 | 3.02E-01 | 8.57E-01 | 9.93E-01 | 1.40E-01 | 7.39E-02 |
| 229.14463 | 287.34 | 17.39 | 17.24 | 17.19 | 17.52 | 5.52E-02 | 6.26E-01 | 3.71E-01 | 7.40E-01 | 9.79E-01 | 1.47E-01 | 5.82E-02 |
| 229.15635 | 18.75  | 14.89 | 15.94 | 15.26 | 16.00 | 4.74E-02 | 9.67E-02 | 8.46E-01 | 8.28E-02 | 4.51E-01 | 9.99E-01 | 4.00E-01 |
| 229.18103 | 191.97 | 18.51 | 17.25 | 17.14 | 17.88 | 1.21E-18 | 7.34E-14 | 4.42E-14 | 3.06E-04 | 8.93E-01 | 5.42E-04 | 2.66E-05 |
| 229.19656 | 226.84 | 18.20 | 17.02 | 17.89 | 18.03 | 3.21E-26 | 7.11E-15 | 7.70E-03 | 3.18E-01 | 4.64E-14 | 4.35E-14 | 5.15E-01 |
| 229.20566 | 208.37 | 14.26 | 14.02 | 14.13 | 14.32 | 9.09E-01 | 9.41E-01 | 9.90E-01 | 9.99E-01 | 9.94E-01 | 9.09E-01 | 9.75E-01 |
| 229.20857 | 202.82 | 19.44 | 17.70 | 17.79 | 18.31 | 5.09E-25 | 2.66E-14 | 3.64E-14 | 1.90E-10 | 9.51E-01 | 2.03E-03 | 1.05E-02 |
| 229.98158 | 32.54  | 15.77 | 17.39 | 17.60 | 16.69 | 6.53E-39 | 5.11E-15 | 5.11E-15 | 1.41E-11 | 3.18E-01 | 4.81E-07 | 3.65E-11 |
| 229.99729 | 24.27  | 20.06 | 19.95 | 19.92 | 20.38 | 3.97E-04 | 7.42E-01 | 5.85E-01 | 2.51E-02 | 9.95E-01 | 1.41E-03 | 5.23E-04 |
| 230.00775 | 20.54  | 18.09 | 19.89 | 19.90 | 19.54 | 2.75E-24 | 3.96E-14 | 3.87E-14 | 1.99E-13 | 1.00E+00 | 2.26E-01 | 2.13E-01 |
| 230.01578 | 19.04  | 17.38 | 18.91 | 18.99 | 18.80 | 4.39E-24 | 4.31E-14 | 3.93E-14 | 4.31E-14 | 9.59E-01 | 9.20E-01 | 6.72E-01 |
| 230.05705 | 45.57  | 20.07 | 20.81 | 22.42 | 21.87 | 1.21E-25 | 1.84E-03 | 1.02E-14 | 5.13E-14 | 1.38E-12 | 8.43E-06 | 4.57E-02 |
| 230.06702 | 29.03  | 16.16 | 16.28 | 16.73 | 15.92 | 5.04E-06 | 8.38E-01 | 7.09E-04 | 3.85E-01 | 1.69E-02 | 9.24E-02 | 1.99E-06 |
| 230.0684  | 289.72 | 17.87 | 17.30 | 17.22 | 17.02 | 9.42E-12 | 5.70E-06 | 9.38E-08 | 1.60E-11 | 8.72E-01 | 7.46E-02 | 3.22E-01 |
| 230.07875 | 26.81  | 20.98 | 21.26 | 21.28 | 20.68 | 1.48E-03 | 3.09E-01 | 2.52E-01 | 2.68E-01 | 1.00E+00 | 4.27E-03 | 2.77E-03 |
| 230.10488 | 289.63 | 18.39 | 16.70 | 16.57 | 16.95 | 4.35E-40 | 5.11E-15 | 5.11E-15 | 1.07E-14 | 7.05E-01 | 2.17E-01 | 1.59E-02 |
| 230.14821 | 146.73 | 15.37 | 15.04 | 15.15 | 15.15 | 5.76E-02 | 3.67E-02 | 2.72E-01 | 3.15E-01 | 8.07E-01 | 8.10E-01 | 1.00E+00 |
| 230.15141 | 67.34  | 14.11 | 14.32 | 15.18 | 15.31 | 2.08E-09 | 7.52E-01 | 2.38E-06 | 2.84E-07 | 3.38E-04 | 5.00E-05 | 9.32E-01 |
| 230.53029 | 24.18  | 20.13 | 24.59 | 24.61 | 23.53 | 2.22E-49 | 5.11E-15 | 5.11E-15 | 5.11E-15 | 1.00E+00 | 7.43E-04 | 4.98E-04 |
| 230.84556 | 95.72  | 14.42 | 14.61 | 14.69 | 14.56 | 5.98E-01 | 8.00E-01 | 5.31E-01 | 9.07E-01 | 9.75E-01 | 9.97E-01 | 9.26E-01 |
| 230.90034 | 26.16  | 15.34 | 15.37 | 15.69 | 15.02 | 1.10E-01 | 9.99E-01 | 5.10E-01 | 6.25E-01 | 6.21E-01 | 5.63E-01 | 6.36E-02 |
| 230.914   | 86.87  | 14.74 | 13.97 | 15.25 | 15.14 | 8.95E-10 | 4.47E-04 | 4.07E-02 | 1.81E-01 | 2.59E-09 | 1.44E-07 | 9.50E-01 |
| 230.9291  | 149.19 | 15.29 | 16.39 | 16.17 | 16.28 | 1.23E-17 | 4.46E-14 | 4.25E-11 | 1.36E-12 | 3.23E-01 | 8.29E-01 | 8.52E-01 |
| 230.95901 | 147.4  | 10.67 | 13.50 | 13.92 | 14.63 | 5.13E-15 | 2.89E-08 | 1.25E-10 | 1.05E-13 | 8.12E-01 | 1.00E-01 | 4.64E-01 |
| 230.98647 | 153.36 | 15.76 | 14.39 | 14.52 | 15.54 | 6.79E-16 | 2.71E-12 | 1.31E-10 | 6.04E-01 | 8.98E-01 | 2.83E-08 | 7.27E-07 |
| 230.99789 | 21.84  | 18.22 | 18.27 | 18.07 | 18.73 | 1.33E-05 | 9.81E-01 | 6.30E-01 | 5.74E-04 | 4.19E-01 | 3.18E-03 | 6.29E-06 |
| 231.01679 | 19.32  | 15.73 | 16.57 | 16.53 | 16.56 | 8.07E-10 | 7.47E-08 | 2.74E-07 | 2.00E-07 | 9.91E-01 | 1.00E+00 | 9.94E-01 |
| 231.03106 | 19.47  | 17.77 | 21.85 | 21.78 | 20.88 | 1.09E-49 | 5.11E-15 | 5.11E-15 | 5.11E-15 | 9.92E-01 | 6.48E-04 | 1.60E-03 |
| 231.04591 | 19.16  | 17.05 | 16.71 | 16.58 | 16.65 | 9.62E-02 | 3.29E-01 | 8.91E-02 | 2.20E-01 | 9.24E-01 | 9.93E-01 | 9.86E-01 |
| 231.05128 | 136.46 | 15.54 | 15.78 | 15.86 | 15.41 | 9.83E-04 | 1.81E-01 | 3.55E-02 | 6.92E-01 | 9.15E-01 | 1.64E-02 | 1.85E-03 |
| 231.06048 | 62.18  | 15.12 | 15.73 | 17.41 | 16.96 | 8.58E-24 | 2.48E-02 | 3.24E-14 | 7.88E-14 | 2.17E-12 | 7.33E-07 | 1.78E-01 |
| 231.08208 | 30.68  | 24.91 | 25.31 | 25.34 | 24.76 | 3.26E-04 | 4.74E-02 | 2.47E-02 | 7.78E-01 | 9.97E-01 | 4.47E-03 | 2.01E-03 |
| 231.08852 | 204.03 | 18.07 | 12.54 | 11.95 | 14.86 | 2.59E-25 | 4.15E-14 | 1.75E-14 | 1.70E-07 | 7.19E-01 | 4.00E-04 | 4.01E-06 |

|           |        |       |       |       |       |          |          |          |          |          |          |          |
|-----------|--------|-------|-------|-------|-------|----------|----------|----------|----------|----------|----------|----------|
| 231.09931 | 18.38  | 15.08 | 15.57 | 15.31 | 15.83 | 2.45E-05 | 7.26E-03 | 4.38E-01 | 1.64E-05 | 3.13E-01 | 3.80E-01 | 6.19E-03 |
| 231.10008 | 289.45 | 17.36 | 15.55 | 16.34 | 15.86 | 4.37E-13 | 8.86E-13 | 7.06E-05 | 6.63E-09 | 4.67E-03 | 5.73E-01 | 1.90E-01 |
| 231.10856 | 208.52 | 15.09 | 9.62  | 9.76  | 10.11 | 9.28E-36 | 5.11E-15 | 5.11E-15 | 9.33E-15 | 9.89E-01 | 6.67E-01 | 8.38E-01 |
| 231.12401 | 190.22 | 16.48 | 16.20 | 16.17 | 16.14 | 3.08E-03 | 2.86E-02 | 1.18E-02 | 6.72E-03 | 9.93E-01 | 9.51E-01 | 9.92E-01 |
| 231.13924 | 195.51 | 16.58 | 16.21 | 15.94 | 15.96 | 1.45E-03 | 1.80E-01 | 2.41E-03 | 5.15E-03 | 4.50E-01 | 5.39E-01 | 1.00E+00 |
| 231.98779 | 33.27  | 16.21 | 17.34 | 17.08 | 16.60 | 5.43E-14 | 2.73E-13 | 1.03E-08 | 3.52E-02 | 2.60E-01 | 6.01E-06 | 6.47E-03 |
| 232.00558 | 59.93  | 16.79 | 14.89 | 15.05 | 15.45 | 7.12E-15 | 2.66E-13 | 1.07E-11 | 4.37E-07 | 9.04E-01 | 1.10E-01 | 3.72E-01 |
| 232.02716 | 28.22  | 14.34 | 12.81 | 14.69 | 15.34 | 3.26E-14 | 9.82E-07 | 6.01E-01 | 3.91E-03 | 3.06E-09 | 6.57E-14 | 1.28E-01 |
| 232.03851 | 110.12 | 17.89 | 17.24 | 17.14 | 16.82 | 1.04E-04 | 2.36E-02 | 6.41E-03 | 5.08E-05 | 9.80E-01 | 3.17E-01 | 5.29E-01 |
| 232.05529 | 60.79  | 15.69 | 15.94 | 17.86 | 17.53 | 8.13E-34 | 4.58E-01 | 5.33E-15 | 3.95E-14 | 3.20E-14 | 4.71E-14 | 2.76E-01 |
| 232.05951 | 25.27  | 19.82 | 18.93 | 19.19 | 19.32 | 1.71E-10 | 5.44E-11 | 3.37E-06 | 6.04E-04 | 1.70E-01 | 1.64E-02 | 7.46E-01 |
| 232.06543 | 19.93  | 13.92 | 12.24 | 12.96 | 16.25 | 4.92E-42 | 9.59E-12 | 1.34E-04 | 4.19E-14 | 1.01E-02 | 5.11E-15 | 5.11E-15 |
| 232.08292 | 255.23 | 20.65 | 18.99 | 18.57 | 19.14 | 1.96E-27 | 4.33E-14 | 5.77E-15 | 4.93E-14 | 7.50E-02 | 8.28E-01 | 7.73E-03 |
| 232.09432 | 20.66  | 14.56 | 15.29 | 16.09 | 15.26 | 6.53E-03 | 3.24E-01 | 2.20E-03 | 3.95E-01 | 2.64E-01 | 1.00E+00 | 2.46E-01 |
| 232.12014 | 200.32 | 16.11 | 14.81 | 14.58 | 14.38 | 1.57E-09 | 1.89E-05 | 2.33E-07 | 1.61E-08 | 8.33E-01 | 4.37E-01 | 9.00E-01 |
| 232.66793 | 261.02 | 15.17 | 15.02 | 14.76 | 14.96 | 5.35E-01 | 9.51E-01 | 4.52E-01 | 8.83E-01 | 7.98E-01 | 9.97E-01 | 9.04E-01 |
| 232.89306 | 98.39  | 14.97 | 15.50 | 15.65 | 15.69 | 6.61E-06 | 2.96E-03 | 5.32E-05 | 3.59E-05 | 7.69E-01 | 6.43E-01 | 9.95E-01 |
| 232.90278 | 97.7   | 14.99 | 14.71 | 14.34 | 15.29 | 1.00E-04 | 4.83E-01 | 6.18E-03 | 4.82E-01 | 2.75E-01 | 3.30E-02 | 5.78E-05 |
| 232.94471 | 164.14 | 15.45 | 18.00 | 18.27 | 19.08 | 1.72E-38 | 2.24E-14 | 5.33E-15 | 5.11E-15 | 6.34E-01 | 6.02E-05 | 4.49E-03 |
| 232.94489 | 40.47  | 19.46 | 20.46 | 20.55 | 20.34 | 1.26E-36 | 5.11E-15 | 5.11E-15 | 2.26E-14 | 6.66E-01 | 4.54E-01 | 4.86E-02 |
| 232.96575 | 170.99 | 19.32 | 18.02 | 17.83 | 18.53 | 2.57E-25 | 4.44E-14 | 1.42E-14 | 6.14E-08 | 5.01E-01 | 1.63E-03 | 4.77E-06 |
| 232.96587 | 71.23  | 17.98 | 16.69 | 16.14 | 16.35 | 7.45E-15 | 1.87E-07 | 1.09E-13 | 1.08E-10 | 7.39E-02 | 4.66E-01 | 8.02E-01 |
| 232.97581 | 207.68 | 14.74 | 7.74  | 8.17  | 9.86  | 4.09E-41 | 5.11E-15 | 5.11E-15 | 3.69E-14 | 7.85E-01 | 7.52E-05 | 2.31E-03 |
| 232.98404 | 26.12  | 16.55 | 15.85 | 15.55 | 15.78 | 7.14E-09 | 9.86E-05 | 4.91E-09 | 2.16E-05 | 2.22E-01 | 9.70E-01 | 4.87E-01 |
| 233.00882 | 25.28  | 15.21 | 14.08 | 14.93 | 15.58 | 7.83E-04 | 8.77E-03 | 8.52E-01 | 7.40E-01 | 9.09E-02 | 4.73E-04 | 2.96E-01 |
| 233.03139 | 24.86  | 16.28 | 16.59 | 16.08 | 16.65 | 2.72E-03 | 2.43E-01 | 5.91E-01 | 1.33E-01 | 1.34E-02 | 9.86E-01 | 5.68E-03 |
| 233.06296 | 25.71  | 15.75 | 14.33 | 14.83 | 15.09 | 1.87E-09 | 3.51E-10 | 6.64E-05 | 1.07E-02 | 8.24E-02 | 3.28E-03 | 6.36E-01 |
| 233.07856 | 18.99  | 16.44 | 16.94 | 17.30 | 17.41 | 7.51E-07 | 3.10E-02 | 1.97E-05 | 2.38E-06 | 2.22E-01 | 6.89E-02 | 9.29E-01 |
| 233.08647 | 29.38  | 18.98 | 18.85 | 18.92 | 18.63 | 7.43E-02 | 7.46E-01 | 9.71E-01 | 5.51E-02 | 9.45E-01 | 4.23E-01 | 1.62E-01 |
| 233.08699 | 191.44 | 19.41 | 19.22 | 18.95 | 19.56 | 5.20E-06 | 3.59E-01 | 4.19E-04 | 5.57E-01 | 9.64E-02 | 2.61E-02 | 4.02E-06 |
| 233.10408 | 177.55 | 17.22 | 16.83 | 16.85 | 16.52 | 5.62E-08 | 1.75E-03 | 3.02E-03 | 7.87E-09 | 9.98E-01 | 3.84E-02 | 2.18E-02 |
| 233.11809 | 176.26 | 15.72 | 14.92 | 15.15 | 15.00 | 1.46E-08 | 5.69E-08 | 1.64E-04 | 1.88E-06 | 3.29E-01 | 9.53E-01 | 6.76E-01 |
| 233.11886 | 89.68  | 15.41 | 13.60 | 14.67 | 14.88 | 1.55E-21 | 2.20E-14 | 3.48E-05 | 8.60E-03 | 3.60E-09 | 8.46E-12 | 5.89E-01 |
| 233.11894 | 21.9   | 16.98 | 15.12 | 16.04 | 17.24 | 1.29E-09 | 1.54E-07 | 1.89E-02 | 8.60E-01 | 2.77E-02 | 1.32E-08 | 2.58E-03 |
| 233.15482 | 290.9  | 19.06 | 19.01 | 19.05 | 19.27 | 2.66E-01 | 9.75E-01 | 1.00E+00 | 4.36E-01 | 9.89E-01 | 2.48E-01 | 3.98E-01 |
| 234.00852 | 20.5   | 18.35 | 17.57 | 17.51 | 17.96 | 1.81E-05 | 2.09E-04 | 5.00E-05 | 1.71E-01 | 9.91E-01 | 1.91E-01 | 1.00E-01 |
| 234.02613 | 19.94  | 15.36 | 16.98 | 16.55 | 17.03 | 6.00E-17 | 8.77E-14 | 1.71E-08 | 7.46E-14 | 1.32E-01 | 9.94E-01 | 8.28E-02 |
| 234.0356  | 151.26 | 16.20 | 15.04 | 14.73 | 15.48 | 2.99E-16 | 1.18E-10 | 4.25E-14 | 1.78E-04 | 2.55E-01 | 5.33E-02 | 1.05E-04 |
| 234.06236 | 173.15 | 17.56 | 17.18 | 17.17 | 17.63 | 1.11E-02 | 1.11E-01 | 9.32E-02 | 9.83E-01 | 1.00E+00 | 6.29E-02 | 5.21E-02 |
| 234.09028 | 187.15 | 16.93 | 16.27 | 15.94 | 16.60 | 3.13E-18 | 3.20E-09 | 4.29E-14 | 1.05E-02 | 9.48E-03 | 1.12E-02 | 1.41E-08 |
| 234.09856 | 253.22 | 21.99 | 19.53 | 19.44 | 19.78 | 1.00E-23 | 4.24E-14 | 4.06E-14 | 5.00E-14 | 9.83E-01 | 7.76E-01 | 5.53E-01 |
| 234.15821 | 205.9  | 17.68 | 17.47 | 17.47 | 17.48 | 1.70E-02 | 4.49E-02 | 3.54E-02 | 5.95E-02 | 1.00E+00 | 1.00E+00 | 1.00E+00 |
| 234.87106 | 20.11  | 16.47 | 16.05 | 16.00 | 16.86 | 4.93E-05 | 1.19E-01 | 6.41E-02 | 1.93E-01 | 9.95E-01 | 4.07E-04 | 1.40E-04 |
| 234.92418 | 34.59  | 21.78 | 22.06 | 21.07 | 21.30 | 2.00E-02 | 8.42E-01 | 1.42E-01 | 4.99E-01 | 2.17E-02 | 1.41E-01 | 9.13E-01 |
| 234.96073 | 103.88 | 15.71 | 15.66 | 16.35 | 16.07 | 3.05E-06 | 9.80E-01 | 4.68E-05 | 6.92E-02 | 1.56E-05 | 3.14E-02 | 2.23E-01 |



|           |        |       |       |       |       |          |          |          |          |          |          |          |
|-----------|--------|-------|-------|-------|-------|----------|----------|----------|----------|----------|----------|----------|
| 234.98145 | 170.48 | 16.30 | 15.91 | 15.86 | 16.37 | 9.05E-07 | 1.90E-03 | 2.67E-04 | 9.19E-01 | 9.66E-01 | 3.73E-04 | 4.89E-05 |
| 235.01169 | 17.35  | 19.01 | 18.51 | 18.10 | 17.85 | 1.06E-05 | 1.37E-01 | 5.64E-04 | 1.17E-05 | 3.10E-01 | 3.70E-02 | 7.28E-01 |
| 235.03169 | 33.17  | 16.51 | 17.00 | 16.82 | 16.61 | 8.45E-05 | 7.72E-05 | 2.64E-02 | 8.14E-01 | 3.66E-01 | 4.90E-03 | 2.71E-01 |
| 235.04006 | 20.62  | 16.42 | 16.49 | 16.42 | 16.63 | 2.44E-01 | 9.27E-01 | 1.00E+00 | 2.59E-01 | 9.31E-01 | 6.25E-01 | 2.75E-01 |
| 235.04626 | 138.72 | 15.53 | 15.13 | 15.18 | 15.17 | 9.14E-03 | 1.40E-02 | 4.02E-02 | 4.59E-02 | 9.81E-01 | 9.87E-01 | 1.00E+00 |
| 235.07376 | 293.75 | 17.71 | 17.16 | 16.90 | 17.13 | 5.71E-10 | 3.21E-05 | 2.59E-10 | 1.33E-05 | 1.35E-01 | 9.90E-01 | 2.73E-01 |
| 235.08336 | 17.83  | 16.29 | 14.55 | 13.66 | 14.33 | 1.44E-12 | 3.00E-06 | 8.48E-13 | 2.40E-07 | 4.96E-02 | 9.24E-01 | 2.32E-01 |
| 235.09286 | 263.13 | 17.49 | 16.56 | 16.67 | 16.53 | 2.18E-15 | 3.28E-12 | 4.09E-10 | 1.98E-12 | 8.26E-01 | 9.93E-01 | 6.84E-01 |
| 235.09804 | 153.26 | 15.30 | 14.14 | 13.68 | 14.09 | 1.41E-20 | 1.09E-11 | 3.91E-14 | 5.90E-12 | 2.47E-02 | 9.92E-01 | 6.40E-02 |
| 235.10191 | 279.03 | 18.07 | 17.06 | 17.03 | 17.30 | 1.29E-19 | 4.25E-14 | 4.33E-14 | 9.19E-10 | 9.96E-01 | 1.79E-01 | 1.09E-01 |
| 235.12164 | 170.79 | 16.48 | 16.09 | 16.08 | 15.89 | 1.79E-27 | 5.62E-14 | 4.29E-14 | 5.33E-15 | 9.80E-01 | 1.77E-04 | 6.80E-04 |
| 235.13427 | 190.63 | 17.61 | 17.32 | 17.27 | 17.21 | 1.09E-03 | 2.86E-02 | 7.01E-03 | 1.59E-03 | 9.74E-01 | 7.83E-01 | 9.51E-01 |
| 235.17055 | 209.73 | 18.74 | 18.13 | 18.17 | 18.03 | 9.05E-07 | 5.88E-05 | 1.76E-04 | 3.98E-06 | 9.91E-01 | 9.00E-01 | 7.58E-01 |
| 235.92734 | 59.93  | 17.90 | 16.46 | 17.25 | 17.11 | 9.07E-17 | 4.44E-14 | 7.74E-05 | 2.42E-06 | 2.30E-06 | 2.56E-04 | 8.04E-01 |
| 236.01577 | 31.61  | 18.06 | 19.06 | 19.24 | 18.09 | 2.29E-18 | 4.29E-10 | 1.71E-13 | 9.98E-01 | 6.05E-01 | 8.07E-09 | 5.40E-12 |
| 236.02169 | 23.78  | 20.26 | 20.44 | 20.58 | 20.26 | 7.83E-02 | 5.81E-01 | 1.03E-01 | 1.00E+00 | 7.63E-01 | 6.17E-01 | 1.32E-01 |
| 236.03103 | 30.09  | 13.07 | 13.93 | 14.46 | 13.71 | 1.26E-04 | 2.39E-02 | 3.43E-05 | 1.73E-01 | 3.22E-01 | 8.91E-01 | 8.23E-02 |
| 236.07796 | 185.37 | 17.58 | 17.61 | 17.26 | 17.93 | 1.88E-05 | 9.93E-01 | 5.25E-02 | 2.94E-02 | 3.12E-02 | 7.11E-02 | 3.17E-06 |
| 236.0941  | 17.81  | 15.80 | 10.19 | 9.06  | 13.18 | 1.32E-24 | 4.20E-14 | 1.98E-14 | 1.90E-04 | 2.62E-01 | 2.67E-05 | 2.70E-09 |
| 236.0956  | 172.52 | 15.98 | 15.34 | 15.52 | 15.08 | 2.15E-07 | 1.56E-04 | 1.33E-02 | 9.74E-08 | 6.04E-01 | 3.59E-01 | 2.40E-02 |
| 236.09573 | 289.44 | 16.36 | 17.42 | 18.26 | 17.24 | 7.39E-14 | 1.52E-05 | 4.70E-14 | 7.04E-04 | 1.37E-03 | 8.66E-01 | 9.03E-05 |
| 236.10561 | 289.78 | 19.06 | 19.09 | 19.17 | 19.43 | 3.14E-03 | 9.92E-01 | 6.77E-01 | 2.85E-03 | 8.50E-01 | 9.59E-03 | 8.01E-02 |
| 236.86154 | 75.74  | 21.22 | 22.26 | 22.13 | 21.77 | 1.04E-18 | 4.22E-14 | 8.74E-14 | 1.27E-05 | 6.51E-01 | 1.90E-04 | 1.02E-02 |
| 236.86638 | 24.02  | 14.74 | 15.66 | 15.23 | 15.58 | 1.69E-02 | 1.94E-02 | 3.94E-01 | 4.55E-02 | 5.37E-01 | 9.96E-01 | 7.01E-01 |
| 236.90577 | 136.81 | 15.94 | 14.88 | 15.10 | 15.64 | 3.77E-12 | 3.88E-11 | 1.22E-07 | 1.84E-01 | 4.60E-01 | 9.97E-06 | 2.79E-03 |
| 236.9224  | 58.13  | 18.79 | 17.19 | 17.67 | 17.55 | 7.33E-10 | 7.22E-10 | 2.13E-05 | 4.25E-06 | 1.87E-01 | 4.73E-01 | 9.58E-01 |
| 236.92845 | 81.21  | 16.08 | 13.99 | 15.19 | 14.99 | 1.81E-23 | 7.55E-15 | 3.03E-06 | 2.58E-08 | 8.21E-10 | 8.83E-07 | 6.91E-01 |
| 236.93986 | 39.88  | 23.00 | 23.63 | 23.80 | 23.65 | 4.73E-29 | 4.10E-14 | 5.33E-15 | 4.31E-14 | 5.34E-02 | 9.98E-01 | 9.86E-02 |
| 236.95286 | 25.23  | 14.73 | 15.26 | 15.54 | 14.79 | 5.78E-03 | 1.64E-01 | 9.14E-03 | 9.95E-01 | 7.19E-01 | 3.11E-01 | 3.08E-02 |
| 236.97886 | 25.52  | 15.61 | 15.41 | 15.42 | 16.01 | 1.85E-02 | 7.36E-01 | 7.79E-01 | 2.12E-01 | 1.00E+00 | 2.37E-02 | 2.78E-02 |
| 236.97914 | 138.19 | 14.97 | 14.54 | 14.35 | 14.66 | 1.72E-05 | 3.31E-03 | 5.78E-06 | 7.62E-02 | 4.53E-01 | 7.78E-01 | 8.03E-02 |
| 236.99978 | 33.96  | 14.25 | 14.11 | 14.72 | 14.35 | 2.43E-01 | 9.67E-01 | 4.04E-01 | 9.90E-01 | 2.03E-01 | 8.82E-01 | 6.42E-01 |
| 237.01906 | 30.98  | 12.71 | 13.78 | 14.29 | 12.54 | 4.16E-11 | 3.11E-04 | 2.71E-08 | 9.30E-01 | 2.34E-01 | 6.63E-05 | 6.24E-09 |
| 237.02569 | 23.35  | 18.71 | 18.71 | 18.57 | 18.97 | 5.97E-02 | 1.00E+00 | 7.58E-01 | 2.58E-01 | 7.68E-01 | 2.86E-01 | 3.37E-02 |
| 237.06204 | 146.88 | 16.54 | 15.98 | 16.10 | 16.37 | 5.97E-05 | 8.97E-05 | 2.69E-03 | 5.28E-01 | 8.08E-01 | 2.29E-02 | 1.81E-01 |
| 237.07898 | 130.5  | 14.36 | 11.21 | 12.59 | 13.32 | 9.84E-28 | 5.11E-15 | 1.36E-11 | 2.07E-04 | 3.20E-07 | 9.88E-14 | 2.10E-02 |
| 237.09051 | 287.61 | 20.71 | 18.26 | 18.11 | 19.20 | 3.76E-14 | 2.43E-11 | 1.11E-12 | 9.86E-05 | 9.73E-01 | 3.94E-02 | 1.10E-02 |
| 237.10863 | 269.47 | 18.79 | 17.51 | 17.42 | 17.45 | 2.58E-25 | 4.26E-14 | 3.73E-14 | 4.42E-14 | 9.20E-01 | 9.77E-01 | 9.97E-01 |
| 237.11357 | 184.75 | 16.89 | 16.25 | 16.59 | 16.41 | 8.63E-07 | 4.54E-07 | 4.32E-02 | 3.55E-04 | 2.21E-02 | 5.64E-01 | 4.36E-01 |
| 237.14986 | 169.35 | 16.90 | 15.62 | 15.79 | 15.78 | 7.54E-12 | 1.70E-10 | 2.46E-08 | 6.12E-08 | 7.91E-01 | 8.28E-01 | 1.00E+00 |
| 237.18633 | 170.61 | 16.15 | 14.84 | 14.74 | 14.91 | 2.13E-12 | 2.90E-09 | 1.03E-10 | 4.44E-08 | 9.58E-01 | 9.88E-01 | 8.45E-01 |
| 237.22233 | 257.76 | 17.34 | 16.61 | 16.79 | 16.66 | 1.30E-05 | 3.39E-05 | 2.94E-03 | 2.22E-04 | 6.65E-01 | 9.89E-01 | 8.58E-01 |
| 237.86479 | 91.35  | 14.44 | 14.89 | 15.12 | 14.71 | 1.15E-02 | 1.40E-01 | 6.15E-03 | 5.98E-01 | 6.94E-01 | 8.40E-01 | 2.29E-01 |
| 237.94329 | 42.65  | 17.22 | 17.87 | 17.98 | 17.82 | 1.47E-27 | 4.17E-14 | 7.11E-15 | 4.26E-14 | 3.32E-01 | 8.89E-01 | 8.52E-02 |
| 237.97402 | 36.82  | 17.03 | 15.94 | 17.04 | 15.94 | 1.88E-05 | 1.35E-03 | 1.00E+00 | 2.07E-03 | 1.56E-03 | 1.00E+00 | 2.34E-03 |

|           |        |       |       |       |       |          |          |          |          |          |          |          |
|-----------|--------|-------|-------|-------|-------|----------|----------|----------|----------|----------|----------|----------|
| 237.98936 | 19.24  | 17.98 | 20.52 | 20.48 | 20.17 | 9.00E-34 | 5.11E-15 | 5.11E-15 | 3.29E-14 | 9.98E-01 | 3.32E-01 | 4.18E-01 |
| 238.01044 | 28.09  | 14.21 | 13.01 | 13.63 | 14.56 | 6.05E-06 | 3.75E-04 | 1.88E-01 | 6.61E-01 | 1.76E-01 | 7.71E-06 | 1.46E-02 |
| 238.01864 | 35.54  | 15.37 | 12.79 | 13.20 | 14.13 | 3.54E-07 | 5.77E-07 | 2.85E-05 | 5.08E-02 | 8.28E-01 | 3.55E-02 | 2.28E-01 |
| 238.02482 | 31.65  | 17.06 | 16.75 | 16.24 | 18.54 | 2.27E-18 | 4.83E-01 | 1.31E-03 | 2.81E-09 | 1.17E-01 | 2.81E-12 | 4.14E-14 |
| 238.03975 | 19.2   | 13.49 | 11.66 | 15.22 | 17.20 | 7.49E-70 | 4.36E-14 | 4.66E-14 | 5.11E-15 | 5.11E-15 | 5.11E-15 | 4.22E-14 |
| 238.04905 | 163.44 | 15.24 | 14.46 | 14.83 | 15.04 | 2.00E-03 | 9.42E-04 | 1.83E-01 | 7.67E-01 | 2.79E-01 | 3.82E-02 | 7.70E-01 |
| 238.07356 | 290.63 | 16.99 | 16.49 | 16.12 | 15.57 | 2.32E-07 | 1.56E-01 | 1.26E-03 | 7.79E-08 | 3.88E-01 | 1.26E-03 | 1.16E-01 |
| 238.08435 | 128.31 | 15.37 | 14.59 | 14.46 | 14.82 | 4.60E-11 | 4.74E-08 | 1.06E-10 | 2.85E-04 | 7.47E-01 | 3.47E-01 | 4.21E-02 |
| 238.08476 | 291.48 | 19.50 | 17.13 | 17.02 | 17.31 | 5.93E-73 | 5.11E-15 | 5.11E-15 | 5.11E-15 | 6.97E-01 | 3.60E-01 | 3.59E-02 |
| 238.09335 | 293.96 | 17.81 | 17.81 | 17.51 | 18.23 | 1.01E-06 | 1.00E+00 | 6.29E-02 | 3.13E-03 | 7.18E-02 | 4.61E-03 | 1.36E-07 |
| 238.09354 | 196.94 | 17.43 | 17.92 | 17.92 | 18.54 | 4.75E-12 | 1.70E-03 | 1.55E-03 | 2.96E-13 | 1.00E+00 | 1.07E-04 | 8.81E-05 |
| 238.11014 | 288.32 | 16.88 | 13.61 | 13.34 | 13.99 | 2.05E-13 | 3.19E-10 | 7.54E-12 | 6.57E-08 | 9.47E-01 | 8.69E-01 | 5.58E-01 |
| 238.13005 | 55.46  | 17.01 | 15.63 | 18.23 | 18.39 | 2.33E-45 | 4.91E-14 | 1.55E-12 | 6.43E-14 | 5.11E-15 | 5.11E-15 | 7.80E-01 |
| 238.85974 | 77.21  | 18.79 | 19.66 | 19.61 | 19.27 | 9.95E-17 | 5.44E-14 | 1.80E-13 | 4.25E-05 | 9.68E-01 | 1.82E-03 | 7.53E-03 |
| 238.87728 | 64.26  | 21.41 | 22.34 | 22.38 | 21.97 | 1.59E-24 | 4.01E-14 | 2.93E-14 | 3.20E-08 | 9.57E-01 | 8.47E-04 | 1.03E-04 |
| 238.91716 | 91.46  | 14.54 | 13.13 | 14.17 | 14.06 | 3.49E-03 | 1.60E-03 | 7.63E-01 | 6.03E-01 | 4.05E-02 | 1.03E-01 | 9.91E-01 |
| 238.92141 | 145.72 | 16.19 | 15.60 | 15.88 | 16.10 | 3.46E-04 | 2.91E-04 | 1.23E-01 | 9.35E-01 | 2.29E-01 | 5.26E-03 | 4.28E-01 |
| 238.9321  | 27.6   | 19.68 | 20.00 | 20.52 | 19.60 | 1.73E-08 | 1.48E-01 | 3.40E-07 | 9.61E-01 | 4.82E-03 | 6.36E-02 | 1.32E-07 |
| 238.93798 | 47.49  | 18.76 | 19.41 | 19.51 | 19.35 | 6.12E-30 | 2.95E-14 | 5.33E-15 | 4.37E-14 | 3.39E-01 | 7.53E-01 | 4.40E-02 |
| 238.94404 | 50.23  | 15.64 | 16.23 | 16.31 | 16.13 | 1.34E-12 | 2.61E-09 | 9.80E-12 | 1.58E-06 | 8.21E-01 | 7.34E-01 | 2.38E-01 |
| 238.95803 | 36.07  | 16.25 | 15.61 | 15.61 | 15.65 | 8.63E-03 | 2.17E-02 | 2.09E-02 | 4.62E-02 | 1.00E+00 | 9.97E-01 | 9.98E-01 |
| 238.99477 | 30.5   | 16.45 | 15.54 | 15.59 | 15.30 | 1.04E-09 | 1.89E-06 | 5.51E-06 | 3.45E-09 | 9.93E-01 | 5.59E-01 | 3.92E-01 |
| 239.01571 | 33.63  | 16.84 | 16.52 | 16.18 | 16.61 | 1.66E-01 | 6.96E-01 | 1.09E-01 | 8.66E-01 | 6.69E-01 | 9.92E-01 | 5.08E-01 |
| 239.02291 | 26.53  | 16.94 | 16.24 | 16.04 | 16.00 | 9.89E-07 | 1.14E-03 | 9.20E-06 | 9.14E-06 | 6.97E-01 | 6.15E-01 | 9.98E-01 |
| 239.03153 | 26.9   | 15.16 | 15.54 | 15.52 | 16.21 | 9.49E-04 | 4.33E-01 | 4.64E-01 | 2.84E-04 | 1.00E+00 | 4.87E-02 | 3.90E-02 |
| 239.035   | 19.08  | 17.89 | 18.75 | 18.66 | 18.33 | 6.36E-25 | 2.11E-14 | 4.20E-14 | 5.24E-07 | 6.06E-01 | 1.96E-06 | 3.26E-04 |
| 239.0601  | 249.48 | 18.29 | 19.08 | 19.33 | 18.71 | 2.21E-09 | 9.32E-06 | 1.91E-09 | 5.37E-02 | 4.03E-01 | 1.30E-01 | 1.38E-03 |
| 239.0681  | 19.07  | 14.42 | 13.51 | 13.55 | 14.83 | 1.75E-04 | 3.53E-02 | 4.32E-02 | 6.17E-01 | 1.00E+00 | 1.23E-03 | 1.55E-03 |
| 239.0688  | 206.77 | 17.00 | 13.76 | 13.97 | 14.30 | 1.40E-28 | 9.33E-15 | 2.26E-14 | 4.33E-14 | 8.79E-01 | 2.43E-01 | 6.51E-01 |
| 239.06885 | 291.08 | 17.69 | 16.73 | 16.76 | 16.93 | 8.70E-10 | 1.94E-08 | 4.73E-08 | 1.97E-05 | 9.96E-01 | 6.22E-01 | 7.47E-01 |
| 239.07753 | 190.23 | 19.41 | 19.92 | 19.90 | 19.28 | 2.61E-06 | 1.67E-03 | 2.99E-03 | 7.97E-01 | 9.97E-01 | 1.09E-04 | 2.04E-04 |
| 239.0888  | 290.17 | 16.84 | 11.40 | 11.27 | 13.16 | 1.64E-37 | 5.11E-15 | 5.11E-15 | 4.33E-14 | 9.87E-01 | 1.55E-04 | 3.36E-05 |
| 239.0928  | 154.4  | 15.47 | 14.58 | 14.96 | 14.99 | 1.23E-04 | 2.85E-05 | 3.53E-02 | 7.23E-02 | 2.09E-01 | 1.67E-01 | 9.98E-01 |
| 239.09703 | 66.42  | 14.77 | 13.30 | 15.41 | 15.97 | 1.98E-33 | 1.05E-13 | 1.96E-03 | 2.01E-09 | 1.15E-14 | 5.11E-15 | 1.51E-02 |
| 239.10434 | 48.08  | 14.63 | 20.02 | 13.95 | 12.95 | 1.96E-64 | 5.11E-15 | 9.34E-02 | 3.62E-07 | 5.11E-15 | 5.11E-15 | 6.33E-03 |
| 239.10527 | 280.43 | 20.11 | 18.41 | 18.61 | 18.71 | 9.54E-32 | 5.11E-15 | 1.35E-14 | 3.99E-14 | 4.33E-01 | 1.23E-01 | 8.73E-01 |
| 239.11562 | 26.49  | 13.98 | 15.93 | 15.82 | 15.93 | 1.31E-09 | 1.05E-07 | 4.75E-07 | 2.48E-07 | 9.86E-01 | 1.00E+00 | 9.89E-01 |
| 239.12923 | 188.89 | 17.69 | 17.12 | 17.16 | 17.15 | 1.75E-08 | 4.24E-07 | 2.86E-06 | 3.43E-06 | 9.73E-01 | 9.92E-01 | 9.99E-01 |
| 239.12926 | 290.86 | 16.98 | 16.32 | 16.60 | 16.60 | 3.71E-03 | 1.34E-03 | 1.27E-01 | 1.52E-01 | 4.22E-01 | 4.46E-01 | 1.00E+00 |
| 239.14053 | 84.32  | 9.55  | 19.12 | 11.69 | 8.22  | 3.68E-49 | 5.11E-15 | 1.04E-03 | 1.04E-01 | 5.11E-15 | 5.11E-15 | 1.05E-07 |
| 239.16554 | 187.84 | 17.62 | 17.01 | 16.98 | 17.27 | 2.31E-05 | 1.84E-04 | 6.00E-05 | 8.59E-02 | 9.96E-01 | 3.14E-01 | 2.09E-01 |
| 239.20178 | 289.77 | 17.78 | 17.42 | 16.92 | 17.47 | 1.53E-14 | 1.38E-03 | 4.40E-14 | 1.01E-02 | 6.19E-06 | 9.65E-01 | 1.13E-06 |
| 239.80641 | 243.15 | 16.04 | 14.91 | 15.46 | 14.96 | 2.39E-06 | 8.70E-06 | 5.46E-02 | 4.17E-05 | 8.55E-02 | 9.96E-01 | 1.58E-01 |
| 239.88063 | 85.39  | 15.00 | 15.25 | 15.42 | 15.21 | 7.44E-05 | 2.99E-02 | 1.62E-05 | 1.11E-01 | 2.10E-01 | 9.72E-01 | 9.12E-02 |
| 239.91158 | 128.07 | 16.95 | 16.36 | 16.04 | 17.36 | 1.46E-12 | 2.85E-03 | 7.82E-07 | 8.63E-02 | 2.58E-01 | 2.97E-07 | 9.95E-12 |

|           |        |       |       |       |       |          |          |          |          |          |          |          |
|-----------|--------|-------|-------|-------|-------|----------|----------|----------|----------|----------|----------|----------|
| 239.92537 | 21.78  | 18.41 | 17.97 | 17.67 | 18.16 | 1.01E-03 | 7.81E-02 | 4.20E-04 | 5.55E-01 | 4.01E-01 | 7.46E-01 | 5.66E-02 |
| 239.93544 | 31.25  | 14.09 | 13.84 | 14.35 | 13.35 | 1.44E-02 | 8.41E-01 | 8.06E-01 | 8.01E-02 | 3.35E-01 | 4.10E-01 | 8.38E-03 |
| 240.01064 | 32.95  | 15.11 | 14.39 | 14.68 | 14.58 | 3.10E-02 | 1.99E-02 | 2.82E-01 | 1.59E-01 | 6.71E-01 | 8.82E-01 | 9.84E-01 |
| 240.02125 | 23.64  | 16.64 | 14.37 | 14.76 | 16.47 | 6.83E-10 | 9.58E-08 | 1.10E-05 | 9.73E-01 | 7.54E-01 | 3.56E-06 | 2.10E-04 |
| 240.05949 | 146.68 | 14.34 | 14.65 | 15.63 | 14.42 | 8.01E-05 | 7.34E-01 | 1.16E-04 | 9.94E-01 | 7.76E-03 | 8.87E-01 | 7.88E-04 |
| 240.06347 | 151.93 | 14.98 | 14.54 | 14.97 | 14.47 | 4.70E-03 | 6.23E-02 | 1.00E+00 | 2.91E-02 | 7.22E-02 | 9.86E-01 | 3.47E-02 |
| 240.08096 | 137.94 | 15.64 | 15.34 | 15.71 | 15.10 | 2.52E-05 | 9.43E-02 | 9.38E-01 | 4.69E-04 | 2.47E-02 | 3.28E-01 | 6.78E-05 |
| 240.08939 | 293.21 | 17.85 | 16.85 | 17.03 | 17.05 | 2.12E-14 | 2.70E-13 | 1.05E-09 | 7.68E-09 | 4.77E-01 | 4.32E-01 | 9.99E-01 |
| 240.10035 | 284.33 | 19.23 | 17.39 | 17.50 | 17.53 | 1.24E-51 | 5.11E-15 | 5.11E-15 | 5.11E-15 | 6.96E-01 | 5.90E-01 | 9.97E-01 |
| 240.12446 | 128.61 | 15.12 | 14.12 | 14.02 | 14.22 | 2.75E-14 | 1.20E-10 | 9.79E-13 | 1.79E-08 | 8.92E-01 | 9.02E-01 | 5.08E-01 |
| 240.14379 | 96.39  | 14.57 | 15.47 | 13.15 | 13.61 | 8.50E-80 | 1.42E-14 | 5.11E-15 | 7.77E-15 | 5.11E-15 | 5.11E-15 | 3.34E-07 |
| 240.1692  | 30.82  | 14.23 | 14.47 | 14.40 | 14.28 | 9.21E-01 | 9.22E-01 | 9.65E-01 | 9.99E-01 | 9.99E-01 | 9.66E-01 | 9.89E-01 |
| 240.20528 | 194.44 | 17.98 | 16.63 | 15.98 | 17.42 | 3.13E-18 | 3.96E-09 | 4.25E-14 | 4.34E-02 | 1.30E-02 | 2.61E-03 | 2.11E-09 |
| 240.85793 | 92.76  | 14.70 | 13.92 | 14.21 | 14.35 | 1.21E-05 | 2.93E-06 | 6.97E-03 | 1.06E-01 | 2.26E-01 | 3.77E-02 | 8.29E-01 |
| 240.8711  | 18.08  | 16.65 | 12.25 | 11.92 | 14.78 | 1.09E-41 | 5.11E-15 | 5.11E-15 | 6.02E-08 | 7.29E-01 | 1.42E-12 | 4.22E-14 |
| 240.87532 | 74.13  | 18.93 | 19.69 | 19.81 | 19.46 | 4.78E-21 | 4.57E-14 | 3.96E-14 | 5.45E-08 | 4.86E-01 | 5.77E-02 | 6.22E-04 |
| 240.88094 | 100.32 | 15.49 | 15.55 | 16.14 | 15.54 | 5.60E-09 | 9.46E-01 | 4.02E-08 | 9.61E-01 | 1.55E-06 | 1.00E+00 | 2.32E-06 |
| 240.9292  | 32.61  | 17.79 | 18.13 | 18.73 | 17.65 | 6.00E-10 | 1.52E-01 | 5.88E-08 | 8.16E-01 | 1.45E-03 | 2.41E-02 | 3.05E-09 |
| 240.95269 | 53.1   | 16.11 | 11.90 | 12.88 | 13.74 | 1.94E-24 | 1.07E-14 | 4.29E-14 | 5.06E-09 | 3.89E-02 | 1.30E-05 | 1.04E-01 |
| 240.97371 | 48.43  | 18.18 | 18.85 | 19.46 | 19.15 | 2.40E-18 | 3.26E-06 | 4.33E-14 | 4.13E-11 | 5.35E-05 | 1.37E-01 | 1.13E-01 |
| 240.99704 | 31.55  | 16.82 | 16.36 | 16.22 | 16.92 | 1.49E-07 | 2.89E-03 | 4.94E-05 | 8.61E-01 | 7.63E-01 | 3.32E-04 | 4.54E-06 |
| 241.03906 | 38.76  | 15.87 | 13.25 | 13.87 | 14.49 | 3.37E-14 | 7.26E-14 | 3.63E-09 | 1.47E-04 | 2.04E-01 | 1.09E-03 | 2.27E-01 |
| 241.05788 | 136.28 | 13.00 | 11.65 | 13.46 | 12.44 | 5.60E-02 | 1.80E-01 | 9.02E-01 | 8.41E-01 | 4.18E-02 | 6.78E-01 | 4.62E-01 |
| 241.06004 | 23.36  | 15.10 | 18.04 | 17.93 | 17.28 | 6.32E-26 | 2.49E-14 | 3.35E-14 | 3.71E-13 | 9.77E-01 | 3.48E-02 | 8.99E-02 |
| 241.07266 | 165.21 | 15.61 | 15.78 | 15.77 | 15.39 | 3.48E-03 | 4.40E-01 | 4.92E-01 | 2.05E-01 | 1.00E+00 | 5.57E-03 | 6.93E-03 |
| 241.08412 | 22.4   | 16.46 | 15.16 | 14.75 | 15.38 | 2.40E-06 | 4.32E-04 | 1.23E-06 | 6.99E-03 | 5.95E-01 | 9.14E-01 | 2.40E-01 |
| 241.08453 | 288.68 | 19.36 | 17.73 | 18.01 | 17.74 | 2.10E-47 | 5.11E-15 | 5.11E-15 | 5.11E-15 | 2.54E-02 | 9.99E-01 | 4.77E-02 |
| 241.09224 | 62.85  | 18.69 | 18.96 | 20.47 | 20.38 | 5.60E-15 | 7.05E-01 | 3.01E-11 | 9.16E-10 | 3.92E-08 | 5.73E-07 | 9.88E-01 |
| 241.12058 | 288.38 | 17.97 | 18.49 | 17.31 | 16.90 | 5.57E-24 | 9.00E-04 | 9.02E-06 | 2.55E-12 | 5.46E-14 | 2.33E-14 | 2.22E-02 |
| 241.14481 | 292.6  | 17.81 | 17.56 | 17.48 | 17.70 | 2.13E-03 | 2.91E-02 | 2.08E-03 | 6.65E-01 | 8.65E-01 | 4.18E-01 | 9.97E-02 |
| 241.18113 | 287.04 | 18.72 | 18.31 | 18.09 | 18.61 | 3.58E-06 | 7.34E-03 | 5.79E-06 | 8.51E-01 | 3.20E-01 | 1.03E-01 | 5.41E-04 |
| 241.2177  | 253.28 | 24.14 | 24.44 | 23.83 | 24.28 | 8.57E-06 | 4.89E-02 | 4.11E-02 | 5.90E-01 | 3.77E-06 | 6.04E-01 | 1.25E-03 |
| 241.9072  | 132.04 | 15.23 | 14.44 | 14.11 | 15.33 | 2.50E-09 | 8.99E-04 | 5.37E-07 | 9.63E-01 | 3.80E-01 | 3.19E-04 | 2.17E-07 |
| 241.92228 | 25.61  | 17.72 | 17.16 | 16.86 | 17.40 | 6.39E-05 | 1.47E-02 | 2.37E-05 | 3.23E-01 | 3.65E-01 | 6.22E-01 | 2.78E-02 |
| 241.96086 | 28.14  | 15.54 | 16.37 | 16.56 | 16.00 | 5.90E-03 | 3.65E-02 | 4.86E-03 | 4.60E-01 | 9.25E-01 | 6.65E-01 | 2.98E-01 |
| 242.01607 | 17.64  | 15.02 | 16.43 | 16.15 | 16.10 | 1.56E-13 | 7.57E-13 | 5.27E-09 | 7.27E-08 | 4.18E-01 | 3.03E-01 | 9.94E-01 |
| 242.04443 | 19.51  | 13.65 | 16.33 | 15.35 | 14.88 | 2.72E-05 | 7.31E-06 | 8.50E-03 | 1.19E-01 | 2.85E-01 | 5.33E-02 | 8.32E-01 |
| 242.06729 | 174.87 | 19.77 | 18.72 | 18.87 | 19.17 | 5.26E-08 | 9.79E-08 | 4.89E-06 | 6.57E-03 | 8.45E-01 | 8.63E-02 | 3.87E-01 |
| 242.08039 | 18.79  | 24.93 | 25.37 | 25.42 | 25.17 | 1.11E-05 | 2.03E-04 | 2.22E-05 | 1.29E-01 | 9.67E-01 | 2.41E-01 | 9.11E-02 |
| 242.096   | 55.59  | 12.14 | 11.82 | 15.15 | 14.37 | 2.19E-10 | 9.34E-01 | 2.19E-07 | 3.50E-04 | 2.51E-08 | 5.44E-05 | 5.05E-01 |
| 242.10482 | 288    | 17.77 | 16.72 | 16.85 | 16.83 | 4.89E-15 | 5.78E-13 | 1.36E-10 | 2.34E-10 | 7.73E-01 | 8.63E-01 | 9.99E-01 |
| 242.11499 | 130.99 | 14.86 | 9.19  | 14.17 | 14.71 | 2.13E-59 | 5.11E-15 | 5.11E-02 | 9.42E-01 | 5.11E-15 | 5.11E-15 | 2.36E-01 |
| 242.11702 | 23.13  | 14.11 | 15.86 | 9.26  | 9.31  | 6.11E-95 | 1.01E-13 | 5.11E-15 | 5.11E-15 | 5.11E-15 | 5.11E-15 | 9.97E-01 |
| 242.12324 | 26.2   | 11.18 | 21.00 | 13.77 | 9.99  | 2.78E-92 | 5.11E-15 | 1.36E-13 | 1.87E-03 | 5.11E-15 | 5.11E-15 | 1.71E-14 |
| 242.14003 | 144.63 | 15.58 | 14.90 | 14.71 | 15.14 | 2.69E-07 | 7.27E-05 | 1.81E-07 | 2.77E-02 | 6.31E-01 | 4.34E-01 | 3.86E-02 |

|           |        |       |       |       |       |          |          |          |          |          |          |          |
|-----------|--------|-------|-------|-------|-------|----------|----------|----------|----------|----------|----------|----------|
| 242.14825 | 149.76 | 15.21 | 14.94 | 14.67 | 15.15 | 4.36E-05 | 1.12E-01 | 4.34E-05 | 9.53E-01 | 1.14E-01 | 3.65E-01 | 9.38E-04 |
| 242.17657 | 276.23 | 17.15 | 16.65 | 16.96 | 17.03 | 2.59E-02 | 1.50E-02 | 6.39E-01 | 9.04E-01 | 2.71E-01 | 1.27E-01 | 9.70E-01 |
| 242.18453 | 151.69 | 16.83 | 16.84 | 16.42 | 16.97 | 4.00E-03 | 1.00E+00 | 3.42E-02 | 8.03E-01 | 3.62E-02 | 8.44E-01 | 3.44E-03 |
| 242.22088 | 251.02 | 21.28 | 21.48 | 20.95 | 21.30 | 3.79E-03 | 4.91E-01 | 8.59E-02 | 9.99E-01 | 1.61E-03 | 6.37E-01 | 7.97E-02 |
| 242.87357 | 88.34  | 15.00 | 14.47 | 14.93 | 14.97 | 2.42E-05 | 5.36E-05 | 9.38E-01 | 9.92E-01 | 7.62E-04 | 4.48E-04 | 9.93E-01 |
| 242.88513 | 51.7   | 17.27 | 15.68 | 17.04 | 17.28 | 1.69E-30 | 5.77E-15 | 2.86E-01 | 1.00E+00 | 3.95E-14 | 8.66E-15 | 2.92E-01 |
| 242.8963  | 93.95  | 15.49 | 14.70 | 14.99 | 15.14 | 3.53E-06 | 8.44E-07 | 3.54E-03 | 8.80E-02 | 2.04E-01 | 2.38E-02 | 7.69E-01 |
| 242.90542 | 108.83 | 15.89 | 15.02 | 14.78 | 15.60 | 8.79E-15 | 7.16E-09 | 1.99E-13 | 1.54E-01 | 3.28E-01 | 5.57E-04 | 2.81E-07 |
| 242.98551 | 190.58 | 16.03 | 14.94 | 14.74 | 15.06 | 1.54E-03 | 1.23E-02 | 1.55E-03 | 4.08E-02 | 9.41E-01 | 9.88E-01 | 8.11E-01 |
| 242.99199 | 19.46  | 18.53 | 18.07 | 17.91 | 18.13 | 1.42E-09 | 8.80E-06 | 6.18E-10 | 2.29E-04 | 3.05E-01 | 9.29E-01 | 9.81E-02 |
| 243.01162 | 28.51  | 16.13 | 17.66 | 17.04 | 16.79 | 1.05E-11 | 1.21E-12 | 2.41E-05 | 5.67E-03 | 1.19E-02 | 2.30E-04 | 6.19E-01 |
| 243.03954 | 18.61  | 17.82 | 19.70 | 19.62 | 19.52 | 3.73E-35 | 5.11E-15 | 5.11E-15 | 1.02E-14 | 9.38E-01 | 6.29E-01 | 9.18E-01 |
| 243.06286 | 22.09  | 22.42 | 21.75 | 22.00 | 22.15 | 2.10E-04 | 7.25E-05 | 2.35E-02 | 2.80E-01 | 3.79E-01 | 6.29E-02 | 7.74E-01 |
| 243.07079 | 144.05 | 16.98 | 15.52 | 15.30 | 15.94 | 1.67E-28 | 3.26E-14 | 5.33E-15 | 1.31E-11 | 3.77E-01 | 1.70E-02 | 4.81E-05 |
| 243.07958 | 180.35 | 15.65 | 15.91 | 16.02 | 15.46 | 1.42E-13 | 1.04E-03 | 8.58E-07 | 3.99E-02 | 4.12E-01 | 1.55E-08 | 1.80E-12 |
| 243.08393 | 18.41  | 20.86 | 21.24 | 21.27 | 21.02 | 5.71E-04 | 3.68E-03 | 1.23E-03 | 4.85E-01 | 9.93E-01 | 2.36E-01 | 1.37E-01 |
| 243.0882  | 174.83 | 16.11 | 16.14 | 16.37 | 15.72 | 4.50E-05 | 9.92E-01 | 1.39E-01 | 1.86E-02 | 2.69E-01 | 1.05E-02 | 9.55E-06 |
| 243.09999 | 288.89 | 19.40 | 17.57 | 17.83 | 17.87 | 8.93E-48 | 5.11E-15 | 5.11E-15 | 5.11E-15 | 7.78E-02 | 3.56E-02 | 9.80E-01 |
| 243.12402 | 172.59 | 17.79 | 17.42 | 17.51 | 17.12 | 1.02E-05 | 1.58E-02 | 9.54E-02 | 1.99E-06 | 9.03E-01 | 1.07E-01 | 1.77E-02 |
| 243.13569 | 26.78  | 11.43 | 16.63 | 8.10  | 8.87  | 3.45E-37 | 4.34E-14 | 4.04E-08 | 6.93E-05 | 5.11E-15 | 5.11E-15 | 5.55E-01 |
| 243.16038 | 188.53 | 19.11 | 18.22 | 18.29 | 18.58 | 1.91E-10 | 1.70E-09 | 2.03E-08 | 9.20E-04 | 9.60E-01 | 5.78E-02 | 1.67E-01 |
| 243.16071 | 18.5   | 17.23 | 16.67 | 16.28 | 17.06 | 2.14E-14 | 1.56E-05 | 9.95E-14 | 4.69E-01 | 5.11E-03 | 9.67E-03 | 3.95E-09 |
| 243.19687 | 287.25 | 17.46 | 17.23 | 17.17 | 17.48 | 9.89E-02 | 4.16E-01 | 2.00E-01 | 9.99E-01 | 9.76E-01 | 3.86E-01 | 1.89E-01 |
| 243.19688 | 179.93 | 19.20 | 20.26 | 19.02 | 18.95 | 1.21E-16 | 9.71E-11 | 5.88E-01 | 3.30E-01 | 1.71E-13 | 8.08E-14 | 9.66E-01 |
| 243.22482 | 235.56 | 17.70 | 17.34 | 17.77 | 17.73 | 2.80E-02 | 8.69E-02 | 9.74E-01 | 9.98E-01 | 3.44E-02 | 7.50E-02 | 9.97E-01 |
| 243.95747 | 24.09  | 18.98 | 19.01 | 18.96 | 19.20 | 1.97E-01 | 9.95E-01 | 9.98E-01 | 2.57E-01 | 9.77E-01 | 4.03E-01 | 2.01E-01 |
| 243.96725 | 21.87  | 22.03 | 22.45 | 22.57 | 22.62 | 1.59E-10 | 1.79E-05 | 2.47E-08 | 2.24E-09 | 5.96E-01 | 2.57E-01 | 9.20E-01 |
| 244.02353 | 16.71  | 18.87 | 21.61 | 21.27 | 20.86 | 2.64E-33 | 5.11E-15 | 7.33E-15 | 4.27E-14 | 3.34E-01 | 2.59E-03 | 2.13E-01 |
| 244.03199 | 31.69  | 15.32 | 16.82 | 16.34 | 16.95 | 5.80E-09 | 2.73E-07 | 7.91E-04 | 4.97E-08 | 2.83E-01 | 9.68E-01 | 1.25E-01 |
| 244.06631 | 21.81  | 18.63 | 17.61 | 18.04 | 18.14 | 4.36E-06 | 7.59E-07 | 8.57E-03 | 5.37E-02 | 1.14E-01 | 3.87E-02 | 9.55E-01 |
| 244.07282 | 82.48  | 14.68 | 12.36 | 13.65 | 15.22 | 4.30E-19 | 1.17E-13 | 1.53E-03 | 2.47E-01 | 5.87E-05 | 4.31E-14 | 1.43E-06 |
| 244.08364 | 197.98 | 18.53 | 16.73 | 16.57 | 16.62 | 3.74E-55 | 5.11E-15 | 5.11E-15 | 5.11E-15 | 4.62E-01 | 7.60E-01 | 9.72E-01 |
| 244.08403 | 290.1  | 17.64 | 17.05 | 17.07 | 16.93 | 6.33E-08 | 1.61E-05 | 2.69E-05 | 3.09E-07 | 9.99E-01 | 7.93E-01 | 7.02E-01 |
| 244.1382  | 25.96  | 16.09 | 16.22 | 15.91 | 16.09 | 6.09E-01 | 9.42E-01 | 8.44E-01 | 1.00E+00 | 5.30E-01 | 9.51E-01 | 8.63E-01 |
| 244.16384 | 141.96 | 15.17 | 14.02 | 13.68 | 14.32 | 3.23E-08 | 2.52E-05 | 1.72E-08 | 4.31E-03 | 5.07E-01 | 6.55E-01 | 5.93E-02 |
| 244.2002  | 175.53 | 16.48 | 17.48 | 16.14 | 16.22 | 1.55E-15 | 5.24E-09 | 1.41E-01 | 3.68E-01 | 8.55E-14 | 3.66E-12 | 9.71E-01 |
| 244.87736 | 31.39  | 15.91 | 14.73 | 15.40 | 14.50 | 4.99E-04 | 6.03E-03 | 4.78E-01 | 8.20E-04 | 2.55E-01 | 9.22E-01 | 7.32E-02 |
| 244.88245 | 67.6   | 15.79 | 15.87 | 14.87 | 15.08 | 1.90E-08 | 9.69E-01 | 5.17E-06 | 1.11E-03 | 1.27E-06 | 3.19E-04 | 7.03E-01 |
| 244.89811 | 29.47  | 17.63 | 18.42 | 18.68 | 18.24 | 1.51E-13 | 1.97E-08 | 1.27E-13 | 3.36E-05 | 1.99E-01 | 5.50E-01 | 6.95E-03 |
| 244.90617 | 152.42 | 18.92 | 18.68 | 18.25 | 18.40 | 3.05E-05 | 3.42E-01 | 2.80E-05 | 2.96E-03 | 2.01E-02 | 2.58E-01 | 7.53E-01 |
| 244.91105 | 90.47  | 14.28 | 14.44 | 14.90 | 14.79 | 1.22E-01 | 9.52E-01 | 1.36E-01 | 3.27E-01 | 3.90E-01 | 6.60E-01 | 9.80E-01 |
| 244.93195 | 289.81 | 17.54 | 17.61 | 17.35 | 17.51 | 1.49E-01 | 9.35E-01 | 3.17E-01 | 9.94E-01 | 1.14E-01 | 8.50E-01 | 5.16E-01 |
| 244.96954 | 24.08  | 15.83 | 15.99 | 15.98 | 16.24 | 3.45E-01 | 8.88E-01 | 9.05E-01 | 2.60E-01 | 1.00E+00 | 6.90E-01 | 6.54E-01 |
| 244.98551 | 152.58 | 16.65 | 15.22 | 16.38 | 17.01 | 2.67E-07 | 2.02E-05 | 7.96E-01 | 6.40E-01 | 1.15E-03 | 2.71E-07 | 1.81E-01 |
| 244.98914 | 19.72  | 16.34 | 14.73 | 14.76 | 15.24 | 4.36E-09 | 6.53E-08 | 9.22E-08 | 5.66E-04 | 9.99E-01 | 2.89E-01 | 3.41E-01 |

|           |        |       |       |       |       |          |          |          |          |          |          |          |
|-----------|--------|-------|-------|-------|-------|----------|----------|----------|----------|----------|----------|----------|
| 244.99778 | 143.97 | 15.80 | 12.30 | 13.59 | 13.00 | 1.29E-29 | 5.11E-15 | 7.44E-14 | 4.17E-14 | 2.26E-05 | 6.27E-02 | 1.55E-01 |
| 245.00762 | 24.84  | 17.39 | 17.51 | 17.40 | 17.94 | 7.97E-06 | 6.71E-01 | 9.99E-01 | 1.60E-05 | 7.74E-01 | 2.10E-03 | 4.62E-05 |
| 245.01331 | 19.22  | 17.39 | 17.38 | 17.42 | 17.35 | 9.98E-01 | 1.00E+00 | 1.00E+00 | 1.00E+00 | 9.99E-01 | 1.00E+00 | 9.97E-01 |
| 245.04388 | 21.14  | 24.25 | 24.84 | 24.68 | 24.45 | 9.25E-11 | 1.34E-10 | 2.69E-06 | 1.03E-01 | 2.47E-01 | 7.77E-05 | 3.95E-02 |
| 245.06734 | 17.94  | 15.70 | 15.20 | 15.48 | 14.87 | 2.13E-01 | 5.89E-01 | 9.48E-01 | 1.79E-01 | 8.95E-01 | 8.63E-01 | 4.53E-01 |
| 245.06743 | 165.58 | 15.31 | 15.18 | 16.36 | 14.85 | 5.77E-06 | 9.64E-01 | 1.57E-03 | 3.86E-01 | 4.02E-04 | 6.93E-01 | 5.24E-06 |
| 245.0788  | 198.97 | 15.75 | 9.51  | 10.29 | 10.34 | 1.17E-39 | 5.11E-15 | 5.11E-15 | 5.33E-15 | 2.52E-01 | 2.22E-01 | 9.99E-01 |
| 245.09788 | 32.28  | 16.58 | 14.21 | 14.61 | 14.35 | 1.63E-11 | 5.46E-10 | 2.07E-07 | 1.29E-08 | 6.76E-01 | 9.81E-01 | 8.93E-01 |
| 245.10396 | 178.6  | 16.33 | 16.16 | 16.63 | 15.94 | 1.78E-02 | 8.51E-01 | 4.70E-01 | 2.80E-01 | 1.27E-01 | 7.62E-01 | 1.06E-02 |
| 245.14152 | 25.37  | 17.48 | 17.56 | 16.95 | 16.58 | 4.67E-05 | 9.86E-01 | 7.04E-02 | 4.73E-04 | 3.56E-02 | 2.01E-04 | 3.73E-01 |
| 245.1915  | 195.68 | 15.62 | 14.62 | 14.26 | 14.45 | 1.26E-03 | 3.44E-02 | 1.31E-03 | 1.12E-02 | 7.72E-01 | 9.71E-01 | 9.61E-01 |
| 245.95488 | 38.43  | 14.88 | 14.92 | 14.90 | 14.68 | 9.02E-01 | 1.00E+00 | 1.00E+00 | 9.34E-01 | 1.00E+00 | 9.07E-01 | 9.22E-01 |
| 245.9628  | 25.1   | 16.81 | 17.06 | 17.21 | 17.36 | 5.06E-07 | 4.02E-02 | 1.56E-04 | 3.33E-07 | 4.11E-01 | 1.89E-02 | 4.66E-01 |
| 245.97123 | 26.06  | 14.78 | 15.05 | 15.20 | 15.36 | 2.99E-01 | 8.23E-01 | 5.10E-01 | 2.57E-01 | 9.59E-01 | 7.66E-01 | 9.61E-01 |
| 246.03906 | 27.31  | 15.36 | 15.12 | 12.06 | 13.81 | 2.02E-28 | 7.97E-01 | 5.77E-15 | 4.08E-07 | 2.60E-14 | 4.85E-05 | 1.58E-08 |
| 246.04895 | 23.68  | 19.94 | 20.47 | 20.29 | 20.11 | 7.06E-08 | 4.09E-08 | 4.75E-04 | 2.66E-01 | 1.86E-01 | 6.20E-04 | 1.87E-01 |
| 246.06259 | 192.56 | 16.81 | 16.27 | 15.77 | 16.54 | 4.20E-16 | 2.32E-05 | 4.42E-14 | 1.01E-01 | 1.33E-04 | 1.13E-01 | 3.27E-09 |
| 246.0753  | 75.15  | 14.93 | 11.52 | 13.80 | 15.38 | 4.13E-14 | 1.84E-11 | 6.67E-02 | 7.81E-01 | 1.46E-05 | 7.36E-13 | 6.81E-03 |
| 246.0988  | 259.58 | 18.32 | 17.17 | 16.95 | 17.30 | 3.05E-31 | 2.46E-14 | 5.11E-15 | 4.42E-14 | 1.78E-01 | 5.90E-01 | 7.14E-03 |
| 246.14254 | 257.65 | 16.29 | 15.65 | 15.94 | 16.21 | 4.59E-03 | 4.32E-03 | 2.30E-01 | 9.73E-01 | 4.45E-01 | 2.74E-02 | 5.13E-01 |
| 246.87447 | 31.6   | 15.69 | 14.15 | 14.85 | 14.43 | 2.41E-06 | 1.97E-06 | 2.17E-02 | 2.34E-04 | 8.96E-02 | 7.97E-01 | 5.19E-01 |
| 246.89809 | 163.97 | 16.71 | 13.25 | 11.94 | 14.79 | 3.34E-21 | 2.39E-12 | 3.38E-14 | 2.58E-04 | 2.40E-02 | 6.80E-03 | 3.06E-08 |
| 246.90341 | 160.66 | 12.87 | 15.10 | 12.81 | 13.62 | 3.97E-05 | 1.24E-04 | 9.99E-01 | 4.86E-01 | 1.12E-04 | 3.39E-02 | 4.36E-01 |
| 246.92994 | 86.11  | 14.47 | 14.13 | 14.26 | 14.76 | 4.55E-01 | 8.27E-01 | 9.49E-01 | 8.82E-01 | 9.89E-01 | 4.22E-01 | 6.07E-01 |
| 246.96126 | 47.73  | 14.89 | 14.67 | 14.65 | 14.65 | 6.58E-01 | 7.71E-01 | 7.00E-01 | 7.38E-01 | 1.00E+00 | 1.00E+00 | 1.00E+00 |
| 246.98157 | 170.1  | 16.27 | 15.89 | 15.73 | 16.72 | 2.03E-10 | 3.89E-02 | 6.53E-04 | 8.33E-03 | 6.37E-01 | 2.75E-07 | 3.94E-10 |
| 246.98177 | 35.81  | 17.28 | 18.95 | 18.96 | 18.57 | 4.23E-34 | 5.11E-15 | 5.11E-15 | 4.30E-14 | 1.00E+00 | 2.43E-02 | 1.82E-02 |
| 246.99268 | 19.61  | 15.18 | 13.51 | 14.09 | 14.77 | 1.11E-05 | 9.14E-06 | 7.35E-03 | 6.39E-01 | 3.31E-01 | 2.79E-03 | 2.25E-01 |
| 247.00464 | 26.57  | 15.28 | 14.61 | 14.34 | 15.30 | 1.74E-04 | 3.94E-02 | 1.23E-03 | 1.00E+00 | 7.34E-01 | 4.33E-02 | 1.74E-03 |
| 247.04556 | 20.82  | 18.12 | 18.08 | 17.93 | 18.00 | 3.71E-01 | 9.77E-01 | 3.41E-01 | 7.11E-01 | 6.13E-01 | 9.16E-01 | 9.49E-01 |
| 247.06635 | 181.73 | 16.48 | 17.56 | 17.44 | 17.44 | 7.69E-27 | 1.80E-14 | 4.30E-14 | 4.35E-14 | 6.23E-01 | 6.65E-01 | 1.00E+00 |
| 247.0839  | 166.23 | 17.41 | 16.50 | 16.44 | 16.51 | 1.98E-11 | 1.62E-08 | 1.23E-09 | 6.79E-08 | 9.79E-01 | 1.00E+00 | 9.60E-01 |
| 247.09432 | 18.76  | 15.84 | 15.84 | 16.04 | 16.51 | 8.10E-04 | 1.00E+00 | 6.62E-01 | 1.31E-03 | 6.65E-01 | 1.72E-03 | 4.99E-02 |
| 247.10252 | 196.06 | 16.73 | 15.73 | 16.29 | 15.19 | 7.38E-22 | 4.39E-11 | 8.16E-03 | 3.33E-14 | 5.44E-04 | 1.82E-03 | 6.29E-12 |
| 247.10664 | 66.07  | 17.10 | 18.66 | 16.51 | 16.61 | 1.56E-79 | 5.11E-15 | 7.37E-13 | 8.86E-09 | 5.11E-15 | 5.11E-15 | 5.59E-01 |
| 247.11917 | 188.23 | 16.42 | 16.20 | 16.18 | 16.06 | 1.14E-02 | 1.58E-01 | 1.16E-01 | 6.33E-03 | 9.99E-01 | 6.17E-01 | 6.85E-01 |
| 247.13432 | 186.61 | 16.76 | 16.46 | 16.24 | 15.87 | 7.07E-06 | 2.72E-01 | 9.33E-03 | 2.25E-06 | 5.60E-01 | 4.71E-03 | 1.45E-01 |
| 247.17064 | 189.65 | 16.02 | 15.45 | 16.48 | 15.92 | 1.83E-08 | 1.39E-03 | 1.45E-02 | 9.32E-01 | 1.88E-09 | 1.83E-02 | 3.65E-03 |
| 247.96186 | 36.28  | 15.53 | 15.37 | 15.16 | 14.67 | 3.45E-04 | 8.45E-01 | 2.34E-01 | 1.77E-04 | 7.29E-01 | 4.95E-03 | 8.30E-02 |
| 248.02423 | 17.9   | 15.60 | 16.01 | 15.49 | 16.07 | 1.74E-02 | 2.12E-01 | 9.61E-01 | 1.28E-01 | 8.31E-02 | 9.92E-01 | 4.64E-02 |
| 248.03369 | 30.65  | 17.46 | 15.49 | 15.91 | 15.99 | 3.01E-12 | 7.24E-12 | 5.31E-08 | 6.78E-07 | 3.89E-01 | 2.69E-01 | 9.92E-01 |
| 248.05466 | 25.06  | 18.01 | 17.11 | 17.42 | 17.49 | 3.07E-12 | 5.68E-13 | 1.86E-06 | 6.60E-05 | 3.92E-02 | 9.13E-03 | 9.35E-01 |
| 248.07005 | 182.69 | 14.14 | 13.14 | 13.70 | 13.97 | 2.74E-02 | 1.93E-02 | 5.48E-01 | 9.62E-01 | 3.87E-01 | 9.95E-02 | 8.65E-01 |
| 248.07243 | 26.09  | 14.39 | 14.44 | 12.67 | 13.17 | 1.27E-04 | 1.00E+00 | 9.80E-04 | 4.44E-02 | 1.07E-03 | 4.29E-02 | 7.28E-01 |
| 248.08014 | 289.58 | 14.18 | 16.34 | 16.57 | 15.09 | 2.42E-10 | 1.25E-07 | 2.99E-09 | 7.87E-02 | 9.26E-01 | 9.27E-03 | 1.05E-03 |

|           |        |       |       |       |       |          |          |          |          |          |          |          |
|-----------|--------|-------|-------|-------|-------|----------|----------|----------|----------|----------|----------|----------|
| 248.08043 | 24.97  | 18.48 | 19.76 | 18.36 | 19.48 | 1.44E-06 | 1.20E-04 | 9.76E-01 | 6.07E-03 | 3.13E-05 | 7.98E-01 | 1.97E-03 |
| 248.11518 | 206.87 | 17.18 | 15.94 | 15.59 | 15.57 | 9.21E-13 | 5.59E-07 | 7.37E-11 | 2.03E-10 | 4.19E-01 | 4.06E-01 | 1.00E+00 |
| 248.5825  | 23.52  | 17.22 | 17.99 | 16.72 | 17.96 | 1.04E-07 | 6.86E-03 | 1.28E-01 | 1.26E-02 | 1.43E-06 | 1.00E+00 | 4.44E-06 |
| 248.90149 | 93.05  | 14.26 | 14.44 | 15.06 | 14.84 | 3.29E-05 | 7.65E-01 | 5.29E-05 | 8.63E-03 | 3.59E-03 | 1.30E-01 | 6.46E-01 |
| 248.90923 | 96.56  | 14.75 | 15.21 | 15.12 | 15.04 | 3.03E-02 | 2.50E-02 | 9.51E-02 | 2.90E-01 | 9.52E-01 | 7.65E-01 | 9.66E-01 |
| 248.914   | 152.06 | 17.35 | 14.78 | 14.87 | 15.92 | 6.96E-42 | 5.11E-15 | 5.11E-15 | 6.85E-14 | 9.59E-01 | 2.60E-09 | 2.80E-08 |
| 248.91903 | 51.86  | 18.67 | 18.56 | 18.91 | 18.82 | 9.76E-02 | 8.49E-01 | 3.68E-01 | 7.70E-01 | 8.59E-02 | 3.22E-01 | 9.35E-01 |
| 248.94021 | 57.18  | 18.11 | 15.68 | 11.43 | 13.56 | 6.10E-19 | 1.88E-03 | 4.15E-14 | 1.41E-09 | 1.37E-08 | 1.54E-02 | 1.37E-02 |
| 248.95486 | 43.77  | 11.71 | 13.72 | 14.05 | 12.46 | 7.03E-16 | 8.84E-11 | 8.44E-14 | 5.13E-02 | 6.61E-01 | 1.88E-04 | 1.03E-06 |
| 248.96097 | 44.4   | 24.02 | 25.72 | 25.77 | 25.63 | 1.59E-35 | 5.11E-15 | 5.11E-15 | 7.99E-15 | 9.79E-01 | 9.22E-01 | 7.35E-01 |
| 248.97915 | 25.16  | 15.69 | 14.88 | 15.70 | 16.17 | 1.42E-05 | 4.37E-03 | 1.00E+00 | 2.17E-01 | 4.85E-03 | 4.21E-06 | 2.48E-01 |
| 249.00447 | 22.26  | 16.44 | 17.20 | 17.43 | 18.12 | 1.11E-08 | 1.23E-02 | 4.17E-04 | 1.67E-09 | 8.01E-01 | 3.00E-03 | 4.18E-02 |
| 249.02286 | 18.73  | 24.03 | 24.81 | 24.65 | 24.45 | 2.43E-08 | 2.04E-08 | 1.03E-05 | 7.27E-03 | 5.86E-01 | 3.94E-02 | 4.59E-01 |
| 249.05163 | 28.58  | 18.43 | 18.38 | 18.22 | 17.80 | 1.66E-02 | 9.95E-01 | 7.16E-01 | 1.49E-02 | 8.58E-01 | 3.62E-02 | 2.06E-01 |
| 249.05598 | 19.49  | 15.54 | 15.18 | 15.78 | 15.65 | 5.98E-01 | 8.45E-01 | 9.51E-01 | 9.95E-01 | 5.51E-01 | 7.41E-01 | 9.93E-01 |
| 249.08139 | 168.94 | 16.79 | 15.48 | 15.52 | 15.92 | 7.64E-10 | 1.20E-08 | 2.68E-08 | 4.25E-04 | 9.97E-01 | 1.91E-01 | 2.66E-01 |
| 249.08973 | 290.53 | 18.62 | 15.72 | 16.46 | 16.67 | 7.03E-38 | 5.11E-15 | 8.88E-15 | 3.99E-14 | 6.07E-04 | 1.00E-05 | 6.84E-01 |
| 249.09982 | 209.47 | 15.95 | 9.40  | 11.12 | 10.68 | 9.69E-32 | 5.11E-15 | 4.29E-14 | 3.69E-14 | 3.17E-03 | 5.94E-02 | 8.21E-01 |
| 249.11639 | 178.69 | 15.76 | 12.10 | 14.52 | 12.22 | 1.59E-35 | 5.11E-15 | 4.74E-05 | 5.33E-15 | 4.82E-14 | 9.73E-01 | 3.42E-13 |
| 249.14996 | 202.03 | 17.34 | 16.94 | 16.95 | 16.69 | 3.55E-05 | 1.23E-02 | 1.46E-02 | 1.07E-05 | 1.00E+00 | 2.53E-01 | 2.11E-01 |
| 249.18654 | 174.2  | 20.12 | 17.41 | 18.51 | 18.90 | 2.86E-43 | 5.11E-15 | 2.98E-14 | 6.71E-13 | 4.71E-11 | 4.49E-14 | 5.52E-02 |
| 249.18682 | 231.1  | 17.91 | 16.59 | 17.54 | 17.65 | 1.97E-36 | 5.11E-15 | 1.21E-04 | 1.42E-02 | 3.02E-14 | 1.11E-14 | 6.64E-01 |
| 249.9541  | 28.5   | 17.55 | 17.87 | 17.83 | 17.49 | 1.74E-02 | 1.03E-01 | 1.96E-01 | 9.73E-01 | 9.89E-01 | 4.96E-02 | 1.00E-01 |
| 249.96431 | 44.81  | 19.33 | 21.03 | 21.02 | 20.90 | 2.45E-36 | 5.11E-15 | 5.11E-15 | 7.33E-15 | 9.99E-01 | 7.72E-01 | 8.26E-01 |
| 249.97994 | 18.38  | 9.08  | 16.11 | 15.39 | 14.90 | 9.52E-30 | 5.77E-15 | 2.26E-14 | 4.06E-14 | 6.03E-01 | 1.82E-01 | 8.38E-01 |
| 250.02197 | 23.31  | 17.26 | 17.72 | 17.69 | 17.76 | 8.07E-13 | 1.02E-09 | 1.19E-08 | 1.08E-10 | 9.61E-01 | 9.48E-01 | 7.33E-01 |
| 250.02624 | 18.85  | 18.99 | 19.69 | 19.52 | 19.34 | 2.04E-06 | 1.16E-06 | 3.41E-04 | 5.07E-02 | 5.70E-01 | 5.07E-02 | 5.35E-01 |
| 250.0399  | 17.83  | 18.73 | 19.78 | 19.28 | 19.69 | 6.30E-05 | 1.06E-04 | 9.45E-02 | 7.29E-04 | 1.78E-01 | 9.84E-01 | 3.69E-01 |
| 250.07636 | 19.68  | 10.98 | 8.00  | 10.25 | 16.19 | 1.78E-38 | 1.07E-08 | 4.11E-01 | 3.35E-14 | 3.35E-05 | 5.11E-15 | 7.55E-15 |
| 250.08493 | 291.25 | 18.57 | 16.93 | 16.43 | 16.65 | 2.39E-42 | 5.77E-15 | 5.11E-15 | 5.11E-15 | 1.83E-03 | 2.03E-01 | 3.92E-01 |
| 250.09375 | 176.72 | 17.89 | 17.01 | 16.90 | 17.19 | 1.79E-15 | 1.30E-11 | 7.13E-14 | 1.67E-07 | 8.07E-01 | 4.67E-01 | 9.20E-02 |
| 250.1303  | 24.37  | 16.51 | 16.32 | 16.93 | 16.76 | 8.45E-06 | 3.61E-01 | 3.32E-03 | 2.02E-01 | 7.46E-06 | 3.51E-03 | 5.22E-01 |
| 250.14521 | 211.27 | 17.60 | 18.75 | 18.41 | 18.90 | 1.51E-32 | 7.11E-15 | 5.16E-14 | 5.11E-15 | 3.12E-03 | 4.12E-01 | 7.84E-06 |
| 250.18975 | 131.87 | 17.18 | 13.92 | 15.16 | 15.27 | 4.22E-30 | 5.11E-15 | 4.75E-14 | 5.47E-13 | 2.49E-06 | 7.23E-07 | 9.74E-01 |
| 250.84338 | 30.6   | 14.86 | 13.66 | 13.65 | 14.40 | 1.11E-04 | 6.72E-04 | 5.51E-04 | 4.65E-01 | 1.00E+00 | 1.01E-01 | 9.35E-02 |
| 250.89832 | 45.48  | 23.94 | 23.93 | 24.36 | 23.95 | 5.96E-03 | 1.00E+00 | 1.40E-02 | 1.00E+00 | 1.57E-02 | 9.99E-01 | 2.79E-02 |
| 250.91106 | 143.96 | 15.22 | 11.85 | 11.61 | 13.27 | 2.24E-22 | 4.44E-14 | 4.11E-14 | 9.76E-07 | 9.13E-01 | 9.12E-04 | 6.08E-05 |
| 250.917   | 101.35 | 14.79 | 14.32 | 14.60 | 15.05 | 1.32E-06 | 1.17E-03 | 3.86E-01 | 1.88E-01 | 1.39E-01 | 5.34E-07 | 3.42E-03 |
| 250.92157 | 152.91 | 15.28 | 14.85 | 14.84 | 14.94 | 3.01E-03 | 7.95E-03 | 5.68E-03 | 6.73E-02 | 1.00E+00 | 9.15E-01 | 8.87E-01 |
| 250.93479 | 78.54  | 15.69 | 16.49 | 17.19 | 16.69 | 3.48E-34 | 2.97E-13 | 5.11E-15 | 4.27E-14 | 5.33E-10 | 2.42E-01 | 2.10E-05 |
| 250.93832 | 73.96  | 15.08 | 9.74  | 11.24 | 13.07 | 1.43E-23 | 1.67E-14 | 1.17E-13 | 2.24E-04 | 1.01E-02 | 8.48E-10 | 1.42E-03 |
| 250.95559 | 44.89  | 19.73 | 19.34 | 19.76 | 19.77 | 1.98E-05 | 3.14E-04 | 9.93E-01 | 9.84E-01 | 1.49E-04 | 1.82E-04 | 1.00E+00 |
| 250.96517 | 44.38  | 17.49 | 19.32 | 19.36 | 19.25 | 2.34E-36 | 5.11E-15 | 5.11E-15 | 6.00E-15 | 9.95E-01 | 9.65E-01 | 8.91E-01 |
| 250.97349 | 19.8   | 15.85 | 16.31 | 16.55 | 16.06 | 2.65E-04 | 2.73E-02 | 1.51E-04 | 5.82E-01 | 4.91E-01 | 4.83E-01 | 2.66E-02 |
| 251.01865 | 22.09  | 20.20 | 20.95 | 20.76 | 20.61 | 2.13E-07 | 9.92E-08 | 1.03E-04 | 1.29E-02 | 4.50E-01 | 5.21E-02 | 6.60E-01 |

|           |        |       |       |       |       |          |          |          |          |          |          |          |
|-----------|--------|-------|-------|-------|-------|----------|----------|----------|----------|----------|----------|----------|
| 251.02693 | 22.48  | 16.87 | 17.42 | 17.22 | 17.16 | 1.58E-03 | 5.69E-04 | 5.49E-02 | 1.66E-01 | 4.95E-01 | 3.03E-01 | 9.80E-01 |
| 251.03269 | 28.24  | 16.67 | 15.76 | 16.17 | 16.00 | 1.92E-10 | 7.72E-11 | 6.40E-04 | 3.48E-06 | 8.98E-03 | 2.92E-01 | 5.50E-01 |
| 251.04328 | 20.95  | 19.13 | 20.90 | 20.10 | 19.32 | 1.78E-03 | 1.96E-03 | 1.88E-01 | 9.84E-01 | 3.74E-01 | 1.20E-02 | 4.12E-01 |
| 251.07102 | 286.86 | 18.21 | 13.19 | 13.18 | 14.13 | 1.08E-33 | 5.11E-15 | 5.11E-15 | 4.14E-14 | 1.00E+00 | 1.04E-01 | 9.26E-02 |
| 251.07815 | 193.56 | 16.35 | 15.41 | 15.39 | 15.57 | 5.57E-12 | 1.02E-09 | 3.06E-10 | 7.75E-07 | 9.99E-01 | 7.24E-01 | 6.32E-01 |
| 251.08803 | 141.97 | 16.08 | 15.24 | 15.36 | 15.57 | 3.65E-10 | 9.50E-10 | 1.42E-07 | 5.31E-04 | 7.74E-01 | 6.44E-02 | 3.93E-01 |
| 251.09746 | 73.31  | 16.71 | 16.21 | 16.76 | 17.30 | 2.30E-08 | 9.49E-03 | 9.88E-01 | 1.73E-03 | 4.16E-03 | 2.15E-09 | 6.34E-03 |
| 251.10536 | 282.07 | 19.65 | 17.59 | 17.79 | 17.95 | 3.47E-56 | 5.11E-15 | 5.11E-15 | 5.11E-15 | 2.43E-01 | 7.75E-03 | 4.82E-01 |
| 251.11571 | 208.38 | 15.19 | 9.41  | 9.68  | 11.03 | 9.55E-27 | 1.62E-14 | 2.71E-14 | 4.44E-13 | 9.50E-01 | 1.37E-02 | 5.51E-02 |
| 251.12928 | 193.15 | 16.46 | 15.67 | 15.93 | 15.86 | 4.02E-09 | 2.95E-09 | 8.63E-05 | 1.37E-05 | 1.63E-01 | 4.67E-01 | 9.43E-01 |
| 251.14857 | 211.77 | 14.51 | 15.22 | 15.25 | 15.43 | 7.81E-07 | 2.44E-04 | 9.58E-05 | 1.85E-06 | 9.98E-01 | 6.45E-01 | 7.47E-01 |
| 251.16566 | 169.22 | 16.27 | 15.16 | 15.50 | 15.47 | 2.59E-11 | 1.55E-11 | 3.21E-06 | 2.67E-06 | 1.12E-01 | 2.03E-01 | 9.97E-01 |
| 251.20214 | 202.09 | 23.70 | 21.14 | 21.61 | 22.07 | 3.81E-47 | 5.11E-15 | 5.11E-15 | 1.82E-14 | 6.91E-03 | 1.10E-08 | 1.02E-02 |
| 251.23838 | 267.77 | 16.67 | 13.90 | 14.09 | 13.33 | 4.61E-08 | 1.16E-05 | 4.29E-05 | 1.75E-07 | 9.88E-01 | 7.71E-01 | 5.69E-01 |
| 251.2384  | 153.02 | 13.84 | 12.76 | 13.13 | 13.36 | 8.33E-02 | 5.35E-02 | 3.31E-01 | 6.94E-01 | 8.20E-01 | 5.22E-01 | 9.52E-01 |
| 251.95113 | 29.19  | 15.69 | 15.87 | 15.68 | 15.62 | 3.02E-01 | 5.29E-01 | 1.00E+00 | 9.46E-01 | 4.97E-01 | 2.66E-01 | 9.67E-01 |
| 251.98064 | 21.98  | 14.68 | 11.04 | 11.08 | 11.49 | 7.56E-44 | 5.11E-15 | 5.11E-15 | 5.11E-15 | 9.99E-01 | 2.64E-01 | 3.31E-01 |
| 251.98984 | 30.01  | 18.38 | 18.02 | 18.39 | 17.83 | 5.02E-03 | 1.75E-01 | 1.00E+00 | 1.44E-02 | 1.82E-01 | 7.43E-01 | 1.61E-02 |
| 251.99561 | 26.2   | 17.83 | 17.24 | 17.40 | 16.87 | 5.93E-02 | 3.20E-01 | 5.79E-01 | 3.43E-02 | 9.72E-01 | 7.30E-01 | 4.58E-01 |
| 252.02371 | 24.55  | 15.71 | 17.96 | 18.30 | 17.53 | 1.64E-49 | 5.11E-15 | 5.11E-15 | 5.33E-15 | 9.16E-02 | 2.07E-02 | 2.47E-06 |
| 252.04682 | 23.49  | 16.16 | 16.51 | 16.33 | 16.11 | 2.94E-01 | 3.88E-01 | 8.48E-01 | 9.96E-01 | 8.70E-01 | 3.18E-01 | 7.58E-01 |
| 252.06529 | 18.71  | 14.32 | 13.15 | 13.82 | 14.13 | 3.00E-01 | 2.59E-01 | 8.59E-01 | 9.92E-01 | 7.29E-01 | 4.63E-01 | 9.67E-01 |
| 252.07089 | 21.64  | 15.16 | 16.98 | 13.98 | 14.33 | 5.35E-74 | 5.11E-15 | 3.04E-14 | 1.74E-11 | 5.11E-15 | 5.11E-15 | 1.32E-02 |
| 252.09105 | 165.45 | 17.25 | 16.88 | 16.99 | 16.77 | 1.32E-06 | 1.69E-04 | 1.46E-02 | 1.03E-06 | 5.97E-01 | 6.25E-01 | 7.42E-02 |
| 252.10066 | 278.25 | 20.72 | 18.96 | 19.19 | 19.15 | 1.89E-40 | 5.11E-15 | 5.11E-15 | 5.11E-15 | 2.25E-01 | 3.87E-01 | 9.94E-01 |
| 252.1095  | 76.43  | 14.55 | 11.27 | 13.85 | 14.65 | 2.37E-24 | 3.33E-14 | 1.04E-01 | 9.85E-01 | 1.08E-13 | 3.80E-14 | 6.14E-02 |
| 252.20539 | 190.95 | 21.04 | 18.20 | 18.89 | 19.29 | 8.78E-51 | 5.11E-15 | 5.11E-15 | 8.88E-15 | 2.37E-05 | 4.60E-11 | 3.91E-02 |
| 252.89661 | 62.62  | 20.75 | 20.56 | 21.33 | 21.10 | 7.32E-09 | 4.18E-01 | 1.60E-05 | 3.16E-02 | 1.82E-08 | 2.88E-04 | 2.50E-01 |
| 252.90276 | 73.14  | 16.49 | 15.98 | 16.57 | 16.21 | 2.91E-15 | 3.89E-11 | 6.54E-01 | 6.86E-04 | 1.39E-13 | 1.26E-02 | 9.19E-06 |
| 252.91392 | 47.81  | 23.18 | 23.43 | 23.94 | 23.73 | 7.28E-35 | 1.50E-05 | 5.11E-15 | 3.97E-14 | 4.37E-14 | 7.92E-07 | 9.93E-04 |
| 252.9268  | 40.65  | 12.89 | 13.57 | 14.49 | 10.99 | 1.71E-08 | 5.61E-01 | 1.17E-02 | 2.49E-03 | 3.10E-01 | 2.64E-05 | 4.58E-09 |
| 252.9478  | 32.42  | 16.67 | 15.20 | 15.89 | 15.14 | 5.71E-21 | 4.17E-14 | 5.27E-06 | 4.26E-14 | 1.07E-04 | 9.88E-01 | 4.20E-05 |
| 252.95359 | 59.73  | 15.74 | 15.52 | 15.05 | 15.31 | 2.56E-01 | 9.28E-01 | 2.06E-01 | 6.38E-01 | 5.61E-01 | 9.41E-01 | 8.99E-01 |
| 252.97161 | 225.91 | 16.36 | 14.80 | 14.36 | 15.02 | 4.36E-11 | 3.66E-07 | 3.88E-11 | 2.66E-05 | 4.06E-01 | 8.81E-01 | 1.10E-01 |
| 252.98064 | 17.48  | 9.51  | 13.39 | 14.00 | 12.45 | 4.92E-12 | 7.78E-09 | 1.72E-11 | 2.91E-05 | 7.66E-01 | 4.69E-01 | 7.78E-02 |
| 252.98169 | 225.96 | 14.92 | 13.16 | 13.14 | 14.00 | 4.92E-04 | 1.65E-03 | 1.24E-03 | 2.38E-01 | 1.00E+00 | 3.48E-01 | 3.19E-01 |
| 253.05097 | 27.7   | 19.64 | 20.20 | 20.58 | 20.03 | 1.45E-08 | 8.38E-04 | 2.12E-09 | 4.08E-02 | 4.94E-02 | 7.08E-01 | 2.14E-03 |
| 253.06434 | 34.11  | 15.89 | 16.05 | 16.05 | 15.49 | 4.23E-03 | 7.35E-01 | 7.32E-01 | 8.99E-02 | 1.00E+00 | 7.05E-03 | 6.55E-03 |
| 253.07025 | 226.1  | 15.98 | 13.09 | 12.77 | 13.72 | 6.18E-16 | 4.02E-12 | 5.65E-14 | 1.32E-07 | 8.47E-01 | 3.85E-01 | 7.96E-02 |
| 253.08449 | 282.56 | 18.34 | 17.00 | 16.95 | 16.80 | 2.33E-35 | 7.33E-15 | 5.33E-15 | 5.11E-15 | 9.75E-01 | 3.30E-01 | 5.67E-01 |
| 253.08526 | 19.22  | 15.15 | 10.21 | 10.45 | 11.95 | 2.57E-45 | 5.11E-15 | 5.11E-15 | 3.66E-14 | 8.59E-01 | 3.93E-07 | 1.26E-05 |
| 253.09312 | 283.85 | 18.16 | 18.29 | 18.54 | 17.84 | 2.77E-13 | 4.20E-01 | 1.54E-05 | 6.89E-04 | 8.93E-03 | 2.02E-06 | 7.42E-14 |
| 253.10401 | 289.54 | 16.87 | 14.11 | 14.36 | 15.36 | 1.14E-10 | 8.92E-10 | 2.02E-08 | 2.34E-03 | 9.29E-01 | 2.19E-02 | 9.65E-02 |
| 253.10849 | 157.72 | 16.37 | 15.92 | 16.11 | 15.75 | 2.21E-06 | 5.22E-04 | 8.90E-02 | 1.46E-06 | 3.68E-01 | 4.99E-01 | 1.60E-02 |
| 253.121   | 282.34 | 18.40 | 16.75 | 16.52 | 16.69 | 4.93E-23 | 4.30E-14 | 4.02E-14 | 4.33E-14 | 6.33E-01 | 9.92E-01 | 8.16E-01 |

|           |        |       |       |       |       |          |          |          |          |          |          |          |
|-----------|--------|-------|-------|-------|-------|----------|----------|----------|----------|----------|----------|----------|
| 253.1448  | 160.37 | 17.27 | 16.43 | 16.72 | 16.53 | 2.25E-05 | 3.05E-05 | 1.20E-02 | 4.80E-04 | 3.92E-01 | 9.52E-01 | 7.45E-01 |
| 253.14492 | 289.85 | 16.91 | 16.48 | 16.58 | 16.64 | 8.53E-02 | 6.86E-02 | 2.14E-01 | 4.21E-01 | 9.52E-01 | 8.32E-01 | 9.87E-01 |
| 253.1562  | 73.72  | 15.64 | 17.18 | 14.75 | 15.01 | 1.35E-94 | 5.11E-15 | 5.11E-15 | 4.22E-14 | 5.11E-15 | 5.11E-15 | 1.72E-03 |
| 253.18131 | 163.19 | 16.37 | 14.54 | 13.92 | 15.11 | 1.12E-11 | 3.40E-07 | 5.44E-12 | 1.22E-03 | 2.49E-01 | 3.43E-01 | 3.20E-03 |
| 253.21071 | 212.87 | 17.45 | 16.11 | 15.81 | 16.99 | 1.92E-06 | 3.73E-04 | 5.37E-06 | 5.28E-01 | 7.97E-01 | 5.62E-02 | 3.64E-03 |
| 253.21784 | 228.91 | 29.17 | 28.80 | 28.61 | 28.98 | 1.43E-05 | 5.39E-03 | 6.95E-06 | 3.45E-01 | 3.92E-01 | 4.11E-01 | 1.16E-02 |
| 253.46463 | 225.86 | 16.55 | 14.89 | 15.12 | 15.17 | 3.42E-10 | 2.91E-09 | 2.71E-07 | 1.98E-06 | 8.13E-01 | 7.17E-01 | 9.97E-01 |
| 253.80986 | 291.78 | 14.22 | 16.66 | 16.72 | 16.48 | 4.01E-20 | 4.46E-14 | 4.27E-14 | 3.22E-13 | 9.96E-01 | 9.28E-01 | 8.41E-01 |
| 253.89988 | 76.86  | 14.81 | 12.80 | 14.35 | 14.38 | 1.59E-16 | 4.15E-14 | 1.62E-01 | 2.33E-01 | 2.12E-10 | 4.16E-10 | 9.99E-01 |
| 253.91738 | 56.39  | 17.67 | 17.59 | 18.45 | 18.24 | 1.62E-35 | 5.75E-01 | 6.00E-15 | 4.95E-14 | 5.11E-15 | 4.42E-14 | 9.05E-03 |
| 253.94808 | 58.9   | 16.13 | 13.18 | 14.71 | 14.85 | 6.75E-21 | 2.22E-14 | 8.49E-07 | 2.49E-05 | 2.40E-07 | 4.30E-08 | 9.54E-01 |
| 254.01618 | 25.51  | 16.00 | 15.87 | 15.01 | 16.05 | 2.10E-03 | 9.71E-01 | 5.02E-03 | 9.98E-01 | 2.59E-02 | 9.38E-01 | 5.26E-03 |
| 254.02634 | 32.29  | 15.57 | 14.50 | 15.01 | 15.09 | 9.10E-07 | 1.18E-07 | 1.30E-02 | 5.52E-02 | 3.37E-02 | 1.39E-02 | 9.78E-01 |
| 254.03484 | 21.03  | 16.44 | 18.41 | 18.44 | 18.34 | 1.94E-33 | 5.77E-15 | 5.33E-15 | 1.20E-14 | 9.95E-01 | 9.84E-01 | 9.34E-01 |
| 254.05446 | 35.28  | 16.01 | 16.22 | 16.80 | 15.78 | 9.15E-03 | 8.97E-01 | 4.11E-02 | 8.69E-01 | 2.31E-01 | 4.94E-01 | 6.67E-03 |
| 254.07895 | 19.21  | 18.32 | 18.89 | 18.78 | 18.63 | 5.60E-03 | 4.25E-03 | 3.15E-02 | 2.68E-01 | 9.11E-01 | 4.59E-01 | 8.39E-01 |
| 254.07975 | 290.28 | 16.85 | 16.81 | 16.66 | 16.60 | 3.23E-01 | 9.94E-01 | 5.80E-01 | 3.72E-01 | 7.58E-01 | 5.46E-01 | 9.82E-01 |
| 254.10695 | 122.27 | 15.67 | 13.10 | 13.82 | 14.17 | 4.89E-19 | 4.21E-14 | 1.90E-11 | 1.63E-07 | 2.82E-02 | 4.38E-04 | 5.41E-01 |
| 254.11612 | 290.1  | 18.29 | 16.88 | 16.52 | 16.77 | 1.84E-33 | 3.24E-14 | 5.11E-15 | 1.62E-14 | 3.50E-02 | 8.44E-01 | 2.63E-01 |
| 254.2144  | 223.74 | 16.93 | 13.97 | 13.48 | 14.97 | 4.14E-21 | 4.53E-14 | 4.09E-14 | 2.51E-07 | 4.87E-01 | 2.58E-02 | 1.89E-04 |
| 254.22076 | 228.81 | 26.74 | 26.19 | 26.21 | 26.54 | 2.78E-06 | 2.67E-05 | 4.94E-05 | 3.72E-01 | 9.98E-01 | 2.21E-02 | 3.37E-02 |
| 254.8753  | 92.5   | 15.80 | 16.07 | 16.29 | 16.40 | 8.72E-12 | 5.20E-03 | 2.50E-08 | 3.69E-11 | 4.14E-02 | 7.42E-04 | 5.42E-01 |
| 254.88524 | 94.96  | 14.85 | 13.09 | 13.76 | 14.47 | 8.61E-13 | 1.49E-12 | 1.41E-05 | 3.62E-01 | 1.88E-02 | 1.31E-07 | 1.65E-02 |
| 254.89455 | 76.35  | 14.94 | 13.63 | 14.29 | 14.54 | 3.35E-08 | 6.30E-09 | 8.86E-03 | 2.35E-01 | 9.85E-03 | 2.22E-04 | 6.51E-01 |
| 254.9062  | 37.03  | 19.56 | 19.20 | 19.86 | 19.21 | 6.16E-04 | 1.73E-01 | 3.02E-01 | 2.21E-01 | 1.52E-03 | 1.00E+00 | 2.71E-03 |
| 254.91215 | 50.59  | 20.11 | 20.35 | 20.84 | 20.65 | 2.15E-39 | 2.94E-06 | 5.11E-15 | 1.75E-14 | 4.06E-14 | 2.26E-08 | 4.81E-04 |
| 254.91697 | 132.01 | 16.30 | 16.24 | 16.32 | 16.32 | 8.96E-01 | 9.38E-01 | 1.00E+00 | 9.99E-01 | 9.09E-01 | 9.12E-01 | 1.00E+00 |
| 254.92702 | 34.87  | 20.34 | 21.39 | 21.58 | 21.41 | 2.19E-33 | 1.67E-14 | 5.11E-15 | 2.18E-14 | 1.86E-01 | 9.99E-01 | 2.54E-01 |
| 254.93225 | 65.34  | 15.34 | 12.50 | 14.55 | 15.24 | 4.82E-19 | 4.44E-14 | 4.03E-02 | 9.89E-01 | 7.95E-10 | 4.69E-14 | 1.21E-01 |
| 254.94498 | 32.07  | 14.63 | 12.22 | 14.72 | 12.88 | 6.22E-17 | 1.10E-12 | 9.90E-01 | 4.73E-07 | 4.97E-13 | 1.77E-01 | 1.89E-07 |
| 254.95183 | 20.37  | 17.59 | 18.21 | 18.08 | 18.11 | 1.32E-07 | 2.72E-07 | 7.92E-05 | 4.92E-05 | 6.08E-01 | 7.88E-01 | 9.94E-01 |
| 254.99203 | 17.86  | 16.64 | 16.42 | 16.27 | 16.81 | 2.40E-03 | 4.25E-01 | 4.33E-02 | 6.78E-01 | 7.06E-01 | 5.77E-02 | 2.20E-03 |
| 254.99466 | 258.14 | 17.66 | 16.94 | 17.01 | 17.27 | 6.32E-06 | 1.29E-05 | 9.84E-05 | 4.86E-02 | 9.60E-01 | 1.62E-01 | 3.71E-01 |
| 255.00996 | 27.05  | 13.56 | 13.52 | 14.58 | 13.98 | 1.85E-02 | 9.99E-01 | 2.99E-02 | 6.87E-01 | 2.65E-02 | 6.31E-01 | 4.10E-01 |
| 255.06685 | 275.68 | 18.27 | 16.82 | 17.17 | 17.17 | 1.40E-12 | 2.72E-12 | 8.71E-08 | 2.61E-07 | 2.60E-01 | 2.84E-01 | 1.00E+00 |
| 255.08591 | 263.61 | 17.11 | 15.98 | 16.15 | 16.17 | 1.22E-08 | 6.56E-08 | 3.61E-06 | 1.58E-05 | 8.39E-01 | 7.82E-01 | 9.99E-01 |
| 255.08801 | 159.2  | 15.10 | 15.66 | 15.62 | 14.97 | 4.71E-03 | 6.81E-02 | 9.81E-02 | 9.40E-01 | 9.98E-01 | 2.16E-02 | 3.23E-02 |
| 255.10029 | 269.23 | 18.99 | 17.48 | 17.79 | 17.54 | 1.98E-40 | 5.11E-15 | 6.88E-15 | 5.11E-15 | 1.36E-02 | 9.49E-01 | 7.41E-02 |
| 255.10685 | 29.46  | 15.01 | 15.05 | 13.27 | 15.62 | 1.81E-07 | 1.00E+00 | 7.41E-05 | 4.30E-01 | 8.30E-05 | 5.17E-01 | 2.08E-07 |
| 255.12408 | 163.88 | 16.67 | 15.96 | 16.25 | 15.69 | 1.35E-02 | 8.76E-02 | 5.06E-01 | 9.60E-03 | 7.70E-01 | 8.37E-01 | 2.83E-01 |
| 255.17927 | 257.99 | 18.50 | 17.43 | 17.66 | 17.60 | 8.14E-10 | 2.85E-09 | 3.78E-06 | 1.66E-06 | 4.95E-01 | 7.36E-01 | 9.86E-01 |
| 255.19705 | 276.08 | 18.10 | 17.53 | 17.46 | 17.91 | 2.04E-10 | 2.95E-07 | 4.03E-09 | 2.37E-01 | 8.84E-01 | 2.91E-03 | 1.73E-04 |
| 255.22569 | 237.76 | 23.22 | 22.33 | 22.30 | 22.61 | 1.27E-14 | 4.51E-12 | 8.66E-13 | 4.82E-06 | 9.97E-01 | 1.05E-01 | 6.35E-02 |
| 255.23363 | 257.84 | 31.04 | 31.16 | 31.04 | 30.96 | 1.22E-03 | 4.13E-02 | 9.99E-01 | 4.06E-01 | 6.93E-02 | 4.33E-04 | 3.41E-01 |
| 255.36717 | 258.02 | 17.66 | 16.76 | 16.85 | 16.73 | 8.49E-21 | 4.21E-14 | 9.59E-14 | 4.37E-14 | 8.10E-01 | 9.88E-01 | 6.29E-01 |



|           |        |       |       |       |       |          |          |          |          |          |          |          |
|-----------|--------|-------|-------|-------|-------|----------|----------|----------|----------|----------|----------|----------|
| 255.37786 | 263.34 | 16.48 | 15.01 | 15.37 | 15.68 | 7.93E-13 | 5.62E-13 | 3.52E-08 | 2.25E-04 | 2.20E-01 | 3.50E-03 | 3.71E-01 |
| 255.38195 | 257.9  | 18.78 | 17.36 | 17.66 | 17.65 | 2.93E-24 | 2.02E-14 | 4.29E-14 | 4.91E-14 | 9.65E-02 | 1.22E-01 | 1.00E+00 |
| 255.40066 | 257.83 | 17.05 | 16.23 | 16.09 | 16.14 | 8.71E-09 | 8.09E-06 | 1.20E-07 | 1.29E-06 | 8.60E-01 | 9.59E-01 | 9.93E-01 |
| 255.47318 | 258.06 | 18.15 | 17.06 | 17.29 | 17.26 | 1.40E-26 | 8.88E-15 | 4.17E-14 | 4.40E-14 | 7.55E-02 | 1.62E-01 | 9.94E-01 |
| 255.4833  | 258.19 | 18.65 | 17.77 | 17.91 | 17.93 | 4.09E-25 | 1.95E-14 | 4.44E-14 | 4.36E-14 | 2.67E-01 | 1.89E-01 | 9.95E-01 |
| 255.89953 | 26.45  | 16.73 | 14.58 | 14.09 | 15.14 | 1.02E-07 | 2.15E-05 | 9.06E-08 | 4.00E-03 | 7.20E-01 | 6.47E-01 | 1.25E-01 |
| 255.93049 | 28.69  | 14.46 | 15.85 | 15.92 | 16.04 | 7.75E-17 | 1.46E-11 | 8.61E-13 | 1.37E-13 | 9.80E-01 | 7.60E-01 | 9.28E-01 |
| 255.98606 | 22.07  | 15.58 | 14.72 | 15.00 | 16.02 | 7.74E-03 | 1.18E-01 | 4.32E-01 | 6.77E-01 | 8.90E-01 | 8.39E-03 | 5.80E-02 |
| 256.05979 | 173.34 | 15.67 | 15.01 | 15.08 | 15.62 | 1.32E-07 | 1.01E-05 | 8.46E-05 | 9.80E-01 | 9.56E-01 | 1.58E-04 | 9.85E-04 |
| 256.0603  | 22.9   | 19.43 | 18.54 | 18.62 | 19.31 | 1.78E-13 | 3.39E-10 | 6.23E-09 | 7.83E-01 | 9.43E-01 | 3.42E-07 | 3.99E-06 |
| 256.07804 | 18.89  | 14.23 | 14.56 | 14.98 | 15.61 | 5.07E-03 | 8.28E-01 | 2.04E-01 | 2.99E-03 | 7.07E-01 | 4.76E-02 | 3.89E-01 |
| 256.08301 | 267.07 | 17.95 | 16.53 | 16.65 | 16.85 | 3.32E-28 | 7.99E-15 | 2.60E-14 | 4.26E-14 | 7.93E-01 | 6.40E-02 | 3.74E-01 |
| 256.09483 | 18.74  | 16.36 | 17.00 | 17.22 | 17.51 | 9.34E-07 | 9.92E-03 | 1.73E-04 | 6.07E-07 | 7.19E-01 | 8.63E-02 | 5.25E-01 |
| 256.09539 | 289.72 | 17.28 | 16.44 | 16.77 | 16.70 | 5.97E-06 | 1.87E-06 | 7.60E-03 | 3.08E-03 | 1.80E-01 | 3.85E-01 | 9.82E-01 |
| 256.10723 | 64.03  | 17.10 | 18.43 | 16.55 | 16.65 | 2.95E-85 | 5.11E-15 | 4.27E-14 | 4.49E-11 | 5.11E-15 | 5.11E-15 | 4.00E-01 |
| 256.12054 | 213.55 | 16.97 | 15.52 | 15.59 | 15.57 | 6.16E-16 | 1.10E-12 | 5.36E-12 | 1.46E-11 | 9.88E-01 | 9.96E-01 | 1.00E+00 |
| 256.20024 | 157.5  | 15.90 | 14.14 | 13.53 | 15.28 | 1.26E-15 | 9.46E-09 | 5.54E-14 | 1.37E-01 | 1.46E-01 | 8.19E-04 | 5.21E-08 |
| 256.22694 | 227.68 | 17.84 | 16.58 | 16.63 | 16.82 | 2.55E-07 | 2.37E-06 | 4.61E-06 | 2.92E-04 | 9.98E-01 | 7.87E-01 | 8.72E-01 |
| 256.23516 | 262.62 | 28.72 | 28.48 | 28.44 | 28.53 | 8.97E-07 | 7.25E-05 | 9.29E-07 | 4.32E-03 | 8.16E-01 | 7.90E-01 | 2.80E-01 |
| 256.84354 | 69.85  | 17.97 | 18.43 | 18.76 | 18.63 | 1.74E-14 | 1.75E-05 | 7.46E-14 | 9.68E-10 | 3.56E-03 | 1.99E-01 | 5.12E-01 |
| 256.85465 | 99.34  | 15.29 | 14.99 | 15.42 | 14.81 | 1.59E-06 | 4.14E-02 | 6.93E-01 | 3.26E-04 | 1.72E-03 | 4.55E-01 | 5.10E-06 |
| 256.86431 | 104.42 | 14.93 | 14.44 | 14.12 | 14.52 | 9.29E-07 | 3.52E-03 | 1.52E-07 | 2.91E-02 | 1.23E-01 | 9.40E-01 | 3.37E-02 |
| 256.87726 | 28.2   | 11.55 | 14.13 | 14.01 | 14.79 | 6.43E-12 | 6.78E-08 | 2.15E-07 | 3.82E-11 | 9.93E-01 | 4.75E-01 | 3.17E-01 |
| 256.89092 | 90.61  | 15.04 | 14.62 | 15.14 | 15.38 | 3.78E-14 | 5.93E-06 | 6.49E-01 | 5.93E-04 | 3.39E-08 | 5.03E-14 | 3.03E-02 |
| 256.90359 | 35.1   | 17.89 | 17.49 | 18.26 | 17.37 | 3.19E-05 | 1.52E-01 | 2.15E-01 | 3.79E-02 | 5.94E-04 | 9.27E-01 | 7.09E-05 |
| 256.92255 | 131.86 | 15.54 | 14.92 | 14.99 | 15.89 | 1.13E-03 | 8.79E-02 | 1.43E-01 | 5.72E-01 | 9.96E-01 | 3.26E-03 | 6.32E-03 |
| 256.9491  | 27.84  | 18.20 | 18.34 | 18.23 | 18.50 | 4.42E-02 | 5.72E-01 | 9.93E-01 | 4.19E-02 | 7.47E-01 | 5.24E-01 | 8.92E-02 |
| 256.9711  | 41.44  | 15.51 | 14.43 | 15.17 | 15.33 | 2.71E-02 | 1.88E-02 | 7.82E-01 | 9.59E-01 | 2.03E-01 | 1.01E-01 | 9.78E-01 |
| 256.99119 | 30.87  | 13.52 | 12.88 | 13.86 | 13.24 | 3.35E-02 | 2.21E-01 | 7.18E-01 | 8.49E-01 | 2.08E-02 | 7.29E-01 | 2.80E-01 |
| 257.06649 | 56.63  | 18.52 | 18.65 | 20.40 | 20.37 | 2.64E-22 | 9.27E-01 | 4.37E-14 | 7.51E-14 | 4.75E-13 | 5.20E-12 | 9.99E-01 |
| 257.07739 | 25.87  | 17.65 | 18.41 | 18.60 | 18.63 | 3.77E-10 | 9.90E-06 | 1.65E-08 | 1.82E-08 | 6.31E-01 | 5.34E-01 | 9.97E-01 |
| 257.07949 | 290.48 | 16.94 | 14.38 | 14.56 | 14.76 | 1.48E-07 | 1.32E-06 | 6.34E-06 | 8.08E-05 | 9.83E-01 | 8.79E-01 | 9.80E-01 |
| 257.09763 | 165.24 | 14.07 | 14.94 | 14.83 | 15.00 | 2.44E-06 | 4.13E-05 | 4.07E-04 | 1.94E-05 | 9.39E-01 | 9.92E-01 | 8.32E-01 |
| 257.10375 | 186.95 | 16.13 | 16.43 | 16.53 | 16.19 | 5.04E-03 | 8.66E-02 | 8.26E-03 | 9.70E-01 | 8.56E-01 | 2.71E-01 | 4.82E-02 |
| 257.11365 | 43.98  | 9.09  | 14.56 | 15.10 | 13.16 | 2.03E-17 | 2.37E-13 | 4.33E-14 | 8.54E-08 | 8.64E-01 | 2.01E-01 | 3.26E-02 |
| 257.11565 | 289.16 | 17.92 | 16.54 | 16.68 | 16.67 | 4.76E-21 | 4.24E-14 | 4.62E-14 | 5.96E-14 | 7.51E-01 | 8.14E-01 | 1.00E+00 |
| 257.13968 | 185.72 | 17.43 | 16.87 | 16.91 | 16.90 | 7.20E-09 | 2.26E-07 | 1.24E-06 | 2.05E-06 | 9.81E-01 | 9.91E-01 | 1.00E+00 |
| 257.15102 | 161.24 | 14.17 | 15.33 | 14.35 | 14.30 | 3.43E-05 | 4.97E-05 | 8.87E-01 | 9.65E-01 | 1.21E-03 | 8.43E-04 | 9.96E-01 |
| 257.17608 | 287.81 | 17.46 | 18.08 | 18.05 | 17.72 | 2.62E-08 | 4.21E-07 | 9.33E-07 | 1.08E-01 | 9.97E-01 | 1.24E-02 | 2.10E-02 |
| 257.17682 | 25.04  | 17.16 | 16.97 | 17.16 | 17.08 | 5.04E-01 | 5.25E-01 | 1.00E+00 | 9.38E-01 | 5.52E-01 | 8.86E-01 | 9.46E-01 |
| 257.21267 | 201.36 | 18.22 | 17.49 | 17.15 | 17.83 | 2.43E-13 | 5.59E-07 | 1.63E-13 | 2.21E-02 | 5.52E-02 | 7.49E-02 | 9.35E-06 |
| 257.22781 | 208.41 | 20.65 | 19.99 | 20.16 | 20.13 | 1.36E-04 | 1.28E-04 | 6.80E-03 | 5.11E-03 | 7.04E-01 | 8.31E-01 | 9.97E-01 |
| 257.23909 | 258.12 | 25.09 | 24.54 | 24.68 | 24.74 | 4.67E-15 | 4.46E-14 | 3.13E-09 | 8.71E-07 | 1.06E-01 | 1.45E-02 | 8.41E-01 |
| 257.97557 | 238.25 | 17.07 | 16.44 | 16.77 | 17.09 | 4.07E-07 | 2.56E-06 | 5.89E-02 | 9.99E-01 | 4.19E-02 | 5.24E-06 | 6.08E-02 |
| 258.03936 | 19.19  | 16.34 | 16.59 | 16.49 | 16.64 | 4.94E-01 | 6.20E-01 | 8.80E-01 | 4.81E-01 | 9.66E-01 | 9.95E-01 | 8.96E-01 |

|           |        |       |       |       |       |          |          |          |          |          |          |          |
|-----------|--------|-------|-------|-------|-------|----------|----------|----------|----------|----------|----------|----------|
| 258.05231 | 189.88 | 18.54 | 19.18 | 19.25 | 19.10 | 5.54E-50 | 5.11E-15 | 5.11E-15 | 5.11E-15 | 2.54E-01 | 3.01E-01 | 2.50E-03 |
| 258.0572  | 20.23  | 17.28 | 15.90 | 15.98 | 16.72 | 7.33E-20 | 4.43E-14 | 4.37E-14 | 1.72E-03 | 9.46E-01 | 1.86E-06 | 1.86E-05 |
| 258.06043 | 24     | 13.54 | 15.21 | 14.74 | 14.25 | 1.06E-07 | 5.36E-08 | 1.26E-04 | 6.78E-02 | 3.56E-01 | 6.86E-03 | 3.31E-01 |
| 258.06975 | 59.32  | 13.86 | 13.79 | 15.41 | 14.94 | 1.54E-08 | 9.94E-01 | 1.24E-06 | 2.30E-03 | 7.99E-07 | 1.39E-03 | 4.06E-01 |
| 258.07579 | 18.95  | 18.61 | 18.86 | 19.37 | 19.36 | 2.21E-14 | 7.43E-02 | 9.83E-12 | 9.20E-11 | 1.15E-05 | 3.86E-05 | 9.99E-01 |
| 258.09887 | 195.64 | 18.38 | 15.84 | 15.79 | 15.53 | 3.78E-44 | 5.11E-15 | 5.11E-15 | 5.11E-15 | 9.95E-01 | 3.51E-01 | 4.84E-01 |
| 258.10959 | 60.84  | 11.88 | 14.60 | 15.26 | 15.88 | 2.18E-17 | 9.60E-09 | 7.89E-13 | 4.24E-14 | 4.36E-01 | 2.76E-02 | 5.23E-01 |
| 258.11154 | 210.15 | 14.23 | 7.55  | 6.81  | 7.77  | 1.67E-41 | 5.11E-15 | 5.11E-15 | 5.11E-15 | 4.35E-01 | 9.72E-01 | 2.27E-01 |
| 258.15385 | 38.09  | 13.75 | 14.08 | 14.24 | 14.41 | 1.14E-01 | 6.20E-01 | 2.65E-01 | 9.32E-02 | 9.37E-01 | 6.75E-01 | 9.42E-01 |
| 258.17955 | 149.83 | 15.07 | 14.27 | 13.97 | 14.67 | 2.32E-09 | 1.93E-05 | 2.03E-09 | 1.04E-01 | 3.22E-01 | 1.01E-01 | 5.25E-04 |
| 258.23127 | 207.41 | 17.99 | 17.27 | 17.47 | 17.38 | 2.63E-04 | 2.85E-04 | 1.48E-02 | 4.32E-03 | 6.74E-01 | 9.28E-01 | 9.63E-01 |
| 258.23141 | 98.25  | 11.91 | 8.15  | 10.93 | 11.77 | 7.92E-11 | 4.54E-10 | 2.77E-01 | 9.95E-01 | 8.29E-06 | 1.25E-08 | 4.61E-01 |
| 258.2417  | 259.18 | 20.01 | 19.14 | 19.29 | 19.33 | 2.89E-26 | 1.04E-14 | 4.33E-14 | 4.35E-14 | 2.04E-01 | 8.61E-02 | 9.65E-01 |
| 258.84087 | 81.06  | 16.45 | 16.62 | 17.15 | 17.00 | 1.60E-09 | 4.25E-01 | 9.76E-09 | 1.82E-05 | 3.85E-05 | 8.13E-03 | 5.86E-01 |
| 258.85941 | 68.35  | 16.94 | 15.89 | 17.18 | 17.18 | 2.84E-38 | 7.33E-15 | 2.91E-02 | 3.03E-02 | 5.11E-15 | 5.11E-15 | 1.00E+00 |
| 258.87056 | 91.93  | 14.71 | 15.34 | 15.93 | 15.38 | 8.53E-22 | 8.19E-08 | 1.53E-14 | 2.58E-08 | 1.30E-06 | 9.84E-01 | 1.33E-05 |
| 258.87993 | 97.19  | 15.28 | 14.73 | 14.88 | 15.25 | 4.68E-05 | 2.27E-04 | 1.42E-02 | 9.94E-01 | 6.48E-01 | 1.39E-03 | 4.58E-02 |
| 258.91806 | 128.17 | 17.24 | 17.03 | 17.03 | 17.89 | 7.33E-04 | 7.77E-01 | 7.72E-01 | 2.31E-02 | 1.00E+00 | 1.57E-03 | 1.40E-03 |
| 258.94276 | 172.08 | 19.38 | 18.13 | 17.65 | 18.54 | 9.75E-24 | 9.17E-14 | 1.09E-14 | 6.43E-07 | 9.65E-03 | 5.26E-02 | 2.61E-07 |
| 258.96081 | 31.16  | 13.87 | 15.11 | 15.25 | 14.82 | 1.60E-07 | 8.15E-06 | 3.92E-07 | 1.41E-03 | 9.43E-01 | 7.00E-01 | 3.57E-01 |
| 258.99284 | 18.85  | 15.72 | 15.10 | 14.94 | 15.30 | 1.03E-01 | 2.40E-01 | 8.29E-02 | 6.13E-01 | 9.65E-01 | 9.35E-01 | 7.15E-01 |
| 259.0082  | 29.68  | 16.27 | 15.63 | 16.27 | 16.61 | 2.49E-09 | 3.72E-05 | 1.00E+00 | 6.98E-02 | 4.58E-05 | 6.66E-10 | 8.68E-02 |
| 259.02332 | 20.83  | 23.71 | 24.04 | 23.94 | 24.43 | 1.81E-02 | 4.14E-01 | 6.91E-01 | 8.18E-03 | 9.70E-01 | 3.46E-01 | 1.52E-01 |
| 259.05582 | 185.66 | 14.89 | 15.20 | 15.26 | 15.18 | 7.89E-06 | 4.22E-04 | 1.06E-05 | 1.86E-03 | 8.53E-01 | 9.92E-01 | 7.08E-01 |
| 259.06461 | 58.74  | 13.71 | 11.44 | 14.93 | 15.00 | 2.10E-32 | 5.25E-14 | 2.72E-05 | 1.83E-05 | 5.11E-15 | 5.11E-15 | 9.95E-01 |
| 259.08306 | 165.32 | 15.61 | 15.96 | 15.90 | 15.68 | 2.19E-03 | 5.23E-03 | 2.57E-02 | 9.19E-01 | 9.51E-01 | 5.47E-02 | 1.71E-01 |
| 259.09406 | 126.82 | 16.14 | 15.27 | 15.11 | 15.41 | 4.82E-13 | 2.81E-09 | 1.87E-12 | 1.93E-06 | 6.61E-01 | 7.17E-01 | 1.31E-01 |
| 259.09498 | 289.36 | 16.93 | 16.02 | 16.28 | 16.17 | 8.61E-06 | 1.06E-05 | 2.53E-03 | 4.85E-04 | 5.30E-01 | 8.74E-01 | 9.44E-01 |
| 259.11915 | 157.15 | 16.15 | 15.64 | 15.41 | 16.02 | 6.36E-02 | 3.29E-01 | 6.57E-02 | 9.73E-01 | 8.78E-01 | 6.35E-01 | 2.20E-01 |
| 259.15717 | 38.78  | 15.28 | 15.79 | 15.14 | 14.88 | 5.32E-04 | 6.32E-02 | 9.10E-01 | 2.48E-01 | 1.19E-02 | 2.47E-04 | 6.31E-01 |
| 259.2323  | 234.45 | 17.39 | 15.75 | 16.53 | 16.82 | 1.14E-15 | 4.33E-14 | 1.03E-05 | 1.04E-02 | 1.38E-04 | 1.83E-07 | 3.94E-01 |
| 259.24375 | 233.22 | 21.87 | 21.12 | 21.49 | 21.76 | 4.42E-11 | 5.58E-11 | 1.46E-03 | 6.92E-01 | 3.72E-03 | 1.67E-07 | 7.20E-02 |
| 259.94098 | 26.51  | 19.10 | 17.57 | 17.93 | 18.12 | 1.04E-04 | 6.54E-05 | 3.30E-03 | 2.73E-02 | 7.36E-01 | 4.23E-01 | 9.49E-01 |
| 259.9716  | 25.89  | 16.36 | 18.77 | 19.01 | 18.44 | 4.24E-46 | 5.11E-15 | 5.11E-15 | 5.11E-15 | 4.19E-01 | 1.94E-01 | 3.08E-03 |
| 259.98288 | 31.64  | 19.97 | 20.35 | 20.35 | 19.88 | 4.29E-06 | 2.69E-03 | 2.53E-03 | 8.28E-01 | 1.00E+00 | 2.35E-04 | 2.16E-04 |
| 260.00648 | 43.97  | 15.12 | 13.02 | 12.68 | 15.74 | 9.36E-22 | 1.08E-09 | 1.10E-12 | 2.13E-01 | 7.10E-01 | 1.41E-13 | 4.40E-14 |
| 260.04219 | 17.86  | 15.59 | 13.20 | 13.01 | 14.80 | 1.44E-12 | 4.04E-09 | 1.43E-10 | 1.67E-01 | 9.57E-01 | 3.23E-04 | 3.50E-05 |
| 260.07806 | 202.3  | 18.54 | 17.40 | 17.28 | 17.90 | 2.93E-30 | 1.53E-14 | 5.33E-15 | 1.31E-08 | 6.63E-01 | 1.76E-05 | 6.14E-08 |
| 260.08974 | 18.79  | 16.93 | 17.74 | 17.73 | 18.26 | 1.79E-18 | 6.33E-09 | 9.86E-09 | 4.20E-14 | 9.99E-01 | 1.02E-03 | 5.41E-04 |
| 260.10897 | 32.44  | 17.74 | 17.65 | 17.73 | 17.40 | 4.65E-01 | 9.77E-01 | 1.00E+00 | 4.65E-01 | 9.85E-01 | 7.32E-01 | 5.12E-01 |
| 260.11487 | 193.5  | 17.32 | 15.40 | 14.99 | 15.33 | 2.07E-33 | 2.38E-14 | 5.11E-15 | 2.02E-14 | 8.42E-02 | 9.79E-01 | 2.22E-01 |
| 260.24677 | 238.9  | 19.25 | 18.27 | 18.73 | 19.01 | 3.45E-14 | 6.08E-14 | 5.09E-05 | 1.99E-01 | 6.75E-04 | 2.21E-08 | 8.55E-02 |
| 260.8567  | 69.61  | 15.58 | 14.69 | 15.38 | 15.54 | 2.70E-11 | 1.56E-10 | 3.56E-01 | 9.85E-01 | 1.75E-06 | 8.66E-09 | 6.21E-01 |
| 260.86415 | 22.19  | 14.38 | 14.63 | 13.80 | 13.75 | 2.00E-01 | 9.52E-01 | 6.02E-01 | 5.56E-01 | 3.14E-01 | 2.86E-01 | 9.99E-01 |
| 260.87301 | 23.77  | 17.09 | 17.11 | 17.69 | 17.06 | 1.24E-02 | 1.00E+00 | 2.70E-02 | 9.99E-01 | 4.18E-02 | 9.98E-01 | 2.98E-02 |

|           |        |       |       |       |       |           |          |          |          |          |          |          |
|-----------|--------|-------|-------|-------|-------|-----------|----------|----------|----------|----------|----------|----------|
| 260.88017 | 143.8  | 10.38 | 19.68 | 19.54 | 18.57 | 8.29E-53  | 5.11E-15 | 5.11E-15 | 5.11E-15 | 9.93E-01 | 1.73E-01 | 2.75E-01 |
| 260.8931  | 28.27  | 14.87 | 15.61 | 15.91 | 15.68 | 2.86E-15  | 2.90E-08 | 4.71E-14 | 2.66E-09 | 6.37E-02 | 9.39E-01 | 2.52E-01 |
| 260.91422 | 135.9  | 15.43 | 14.32 | 14.10 | 15.05 | 1.75E-11  | 1.71E-07 | 2.47E-10 | 2.12E-01 | 6.87E-01 | 2.50E-03 | 3.05E-05 |
| 260.97854 | 28.67  | 15.71 | 13.46 | 13.34 | 14.81 | 3.96E-16  | 2.57E-12 | 1.45E-13 | 1.49E-02 | 9.74E-01 | 1.10E-04 | 1.53E-05 |
| 260.98628 | 32.17  | 14.51 | 13.99 | 14.07 | 13.77 | 3.22E-01  | 5.61E-01 | 6.76E-01 | 2.71E-01 | 9.98E-01 | 9.53E-01 | 8.91E-01 |
| 261.04222 | 22.05  | 17.80 | 17.39 | 17.09 | 17.36 | 1.07E-07  | 2.67E-03 | 1.75E-08 | 1.39E-03 | 5.76E-02 | 9.93E-01 | 1.25E-01 |
| 261.07374 | 17.89  | 16.11 | 17.36 | 17.38 | 17.50 | 3.72E-16  | 1.79E-11 | 5.44E-12 | 3.83E-13 | 9.99E-01 | 8.50E-01 | 8.99E-01 |
| 261.08199 | 191.26 | 14.52 | 11.73 | 12.22 | 11.07 | 2.21E-09  | 1.40E-06 | 8.34E-05 | 4.78E-09 | 7.95E-01 | 6.32E-01 | 1.57E-01 |
| 261.093   | 27.57  | 16.07 | 15.46 | 15.33 | 15.59 | 4.67E-09  | 2.08E-06 | 6.15E-09 | 5.10E-04 | 7.23E-01 | 6.93E-01 | 1.49E-01 |
| 261.09889 | 161.96 | 15.73 | 15.16 | 15.62 | 15.31 | 7.65E-05  | 1.54E-04 | 8.50E-01 | 1.32E-02 | 4.12E-03 | 6.94E-01 | 1.17E-01 |
| 261.11153 | 203.95 | 14.82 | 8.32  | 8.20  | 8.42  | 2.43E-48  | 5.11E-15 | 5.11E-15 | 5.11E-15 | 9.91E-01 | 9.95E-01 | 9.52E-01 |
| 261.13482 | 144.98 | 16.18 | 16.27 | 16.22 | 16.05 | 3.73E-01  | 8.82E-01 | 9.87E-01 | 7.23E-01 | 9.79E-01 | 3.19E-01 | 5.35E-01 |
| 261.15026 | 207.63 | 16.29 | 14.45 | 15.09 | 14.62 | 8.80E-10  | 4.05E-09 | 1.78E-04 | 1.96E-07 | 1.28E-01 | 9.47E-01 | 3.87E-01 |
| 261.18654 | 40.02  | 16.20 | 14.10 | 14.82 | 16.34 | 6.78E-11  | 1.78E-08 | 3.50E-04 | 9.77E-01 | 1.59E-01 | 1.17E-08 | 1.65E-04 |
| 261.22285 | 225.92 | 16.76 | 16.20 | 16.22 | 16.23 | 9.39E-03  | 2.17E-02 | 2.72E-02 | 4.21E-02 | 1.00E+00 | 9.99E-01 | 1.00E+00 |
| 261.9789  | 32.68  | 15.21 | 14.79 | 14.77 | 14.47 | 4.64E-05  | 2.57E-02 | 1.36E-02 | 1.29E-05 | 9.98E-01 | 1.74E-01 | 2.38E-01 |
| 261.99279 | 28.66  | 13.99 | 14.13 | 14.17 | 13.84 | 7.69E-01  | 9.72E-01 | 9.41E-01 | 9.72E-01 | 9.99E-01 | 8.35E-01 | 7.67E-01 |
| 262.05757 | 25.86  | 15.78 | 14.97 | 15.76 | 15.72 | 3.54E-02  | 4.98E-02 | 1.00E+00 | 9.97E-01 | 6.80E-02 | 1.09E-01 | 9.99E-01 |
| 262.08505 | 289.8  | 17.15 | 16.37 | 15.79 | 16.11 | 3.05E-05  | 3.26E-02 | 1.43E-05 | 2.58E-03 | 1.89E-01 | 8.29E-01 | 6.92E-01 |
| 262.0935  | 286.62 | 19.40 | 18.83 | 18.90 | 18.85 | 2.64E-04  | 8.95E-04 | 4.63E-03 | 2.12E-03 | 9.63E-01 | 9.99E-01 | 9.87E-01 |
| 262.0939  | 32.39  | 19.19 | 19.71 | 19.52 | 19.75 | 7.45E-04  | 2.52E-03 | 1.12E-01 | 1.58E-03 | 5.63E-01 | 9.96E-01 | 4.48E-01 |
| 262.10306 | 178.77 | 17.00 | 15.83 | 15.77 | 16.03 | 5.85E-25  | 4.00E-14 | 2.91E-14 | 9.73E-14 | 9.59E-01 | 3.43E-01 | 1.35E-01 |
| 262.86972 | 31.57  | 15.06 | 14.68 | 15.12 | 14.69 | 6.32E-02  | 2.44E-01 | 9.90E-01 | 3.02E-01 | 1.46E-01 | 1.00E+00 | 1.89E-01 |
| 262.87234 | 154.64 | 16.86 | 16.77 | 16.47 | 16.67 | 4.77E-02  | 9.26E-01 | 3.23E-02 | 5.58E-01 | 1.68E-01 | 9.02E-01 | 5.50E-01 |
| 262.87795 | 77.13  | 17.42 | 18.39 | 18.75 | 18.39 | 2.49E-39  | 1.02E-14 | 5.11E-15 | 1.58E-14 | 2.31E-04 | 1.00E+00 | 3.19E-04 |
| 262.90407 | 81.41  | 16.00 | 16.18 | 16.97 | 17.02 | 2.91E-34  | 1.37E-01 | 7.99E-15 | 6.66E-15 | 4.31E-14 | 4.40E-14 | 9.19E-01 |
| 262.93492 | 88.24  | 15.10 | 11.35 | 11.07 | 13.00 | 3.22E-52  | 5.11E-15 | 5.11E-15 | 4.34E-14 | 5.92E-01 | 3.23E-11 | 5.37E-14 |
| 262.95561 | 167.2  | 14.73 | 15.63 | 15.77 | 15.86 | 6.90E-12  | 3.56E-07 | 2.25E-09 | 3.76E-10 | 8.20E-01 | 5.21E-01 | 9.52E-01 |
| 262.95583 | 56.02  | 17.78 | 19.00 | 19.14 | 18.95 | 2.24E-26  | 4.34E-14 | 1.67E-14 | 4.24E-14 | 6.57E-01 | 9.82E-01 | 4.37E-01 |
| 262.97672 | 46.05  | 21.57 | 22.37 | 22.34 | 22.44 | 9.26E-11  | 4.55E-08 | 1.39E-07 | 6.46E-09 | 9.94E-01 | 9.59E-01 | 8.72E-01 |
| 263.04128 | 24.83  | 20.71 | 20.81 | 21.19 | 20.91 | 6.97E-02  | 9.54E-01 | 4.98E-02 | 7.42E-01 | 1.89E-01 | 9.61E-01 | 4.64E-01 |
| 263.08096 | 66.56  | 9.78  | 20.23 | 6.28  | 6.39  | 4.77E-101 | 5.11E-15 | 4.24E-14 | 4.71E-14 | 5.11E-15 | 5.11E-15 | 9.94E-01 |
| 263.09719 | 162.53 | 17.33 | 16.66 | 16.72 | 16.84 | 6.41E-06  | 1.60E-05 | 9.55E-05 | 4.44E-03 | 9.71E-01 | 5.89E-01 | 8.35E-01 |
| 263.10474 | 20.24  | 10.00 | 7.53  | 5.90  | 7.03  | 6.54E-13  | 1.38E-05 | 2.59E-13 | 2.49E-07 | 1.10E-02 | 7.89E-01 | 1.55E-01 |
| 263.1055  | 291.76 | 17.96 | 17.16 | 17.06 | 16.84 | 8.44E-09  | 5.92E-05 | 3.51E-06 | 2.18E-08 | 9.42E-01 | 3.29E-01 | 6.54E-01 |
| 263.11508 | 183.3  | 15.72 | 14.10 | 14.52 | 14.59 | 3.70E-14  | 8.58E-14 | 1.06E-08 | 2.20E-07 | 1.56E-01 | 8.38E-02 | 9.85E-01 |
| 263.1294  | 161.79 | 16.44 | 15.15 | 15.38 | 15.19 | 6.94E-13  | 5.92E-11 | 4.95E-08 | 5.30E-10 | 6.09E-01 | 9.98E-01 | 7.44E-01 |
| 263.16572 | 177.46 | 16.07 | 15.53 | 15.43 | 15.36 | 4.27E-05  | 4.31E-03 | 4.05E-04 | 1.36E-04 | 9.33E-01 | 7.63E-01 | 9.78E-01 |
| 263.20205 | 186.45 | 16.56 | 14.45 | 14.06 | 15.05 | 2.33E-19  | 1.27E-13 | 4.29E-14 | 1.65E-07 | 4.32E-01 | 1.20E-01 | 1.44E-03 |
| 263.2384  | 253.76 | 17.63 | 16.39 | 16.41 | 16.86 | 3.95E-03  | 7.24E-03 | 8.27E-03 | 2.11E-01 | 1.00E+00 | 6.36E-01 | 6.73E-01 |
| 263.98006 | 39.79  | 16.90 | 17.43 | 17.51 | 17.66 | 2.16E-07  | 4.12E-04 | 3.25E-05 | 3.81E-07 | 9.45E-01 | 3.76E-01 | 7.02E-01 |
| 264.0449  | 30.07  | 16.96 | 16.98 | 17.38 | 17.10 | 1.73E-01  | 1.00E+00 | 1.73E-01 | 9.15E-01 | 2.39E-01 | 9.52E-01 | 5.62E-01 |
| 264.05885 | 21.88  | 15.76 | 16.59 | 16.97 | 16.61 | 3.87E-12  | 1.79E-06 | 1.55E-12 | 2.10E-06 | 8.23E-02 | 1.00E+00 | 1.18E-01 |
| 264.08454 | 72.25  | 14.49 | 15.62 | 13.02 | 13.50 | 2.93E-94  | 5.11E-15 | 5.11E-15 | 5.11E-15 | 5.11E-15 | 5.11E-15 | 7.73E-09 |
| 264.10048 | 289.54 | 20.10 | 17.60 | 17.96 | 18.01 | 5.58E-75  | 5.11E-15 | 5.11E-15 | 5.11E-15 | 1.65E-03 | 3.60E-04 | 9.53E-01 |

|           |        |       |       |       |       |           |          |          |          |          |          |          |
|-----------|--------|-------|-------|-------|-------|-----------|----------|----------|----------|----------|----------|----------|
| 264.10116 | 62.09  | 16.12 | 10.69 | 14.68 | 15.60 | 1.91E-53  | 5.11E-15 | 1.18E-06 | 2.48E-01 | 5.11E-15 | 5.11E-15 | 7.00E-03 |
| 264.10924 | 289.77 | 17.17 | 16.81 | 16.53 | 16.91 | 4.92E-05  | 3.12E-02 | 1.14E-05 | 2.21E-01 | 1.76E-01 | 8.77E-01 | 3.29E-02 |
| 264.10936 | 191.73 | 17.21 | 16.32 | 16.10 | 16.26 | 3.33E-09  | 7.29E-06 | 1.22E-08 | 3.46E-06 | 6.38E-01 | 9.92E-01 | 8.18E-01 |
| 264.1612  | 226.87 | 17.07 | 17.88 | 18.08 | 17.67 | 8.58E-22  | 5.13E-14 | 3.40E-14 | 1.61E-08 | 1.72E-01 | 1.49E-01 | 2.81E-04 |
| 264.83768 | 258.59 | 17.32 | 15.36 | 15.46 | 16.41 | 2.66E-07  | 1.87E-06 | 5.50E-06 | 8.11E-02 | 9.93E-01 | 4.00E-02 | 7.38E-02 |
| 264.87438 | 86.87  | 12.85 | 13.25 | 14.69 | 14.29 | 3.79E-10  | 5.09E-01 | 3.81E-09 | 1.09E-05 | 1.01E-05 | 3.68E-03 | 5.54E-01 |
| 264.8836  | 91.63  | 13.37 | 11.43 | 14.70 | 13.32 | 6.79E-13  | 5.17E-06 | 3.21E-03 | 9.99E-01 | 8.99E-14 | 3.03E-05 | 3.93E-03 |
| 264.88788 | 158.39 | 17.02 | 16.47 | 16.50 | 17.07 | 2.30E-04  | 7.57E-03 | 1.14E-02 | 9.92E-01 | 9.99E-01 | 5.33E-03 | 7.99E-03 |
| 264.89262 | 42.4   | 18.98 | 17.29 | 18.13 | 18.45 | 5.47E-09  | 9.12E-10 | 4.38E-03 | 1.69E-01 | 6.49E-03 | 1.15E-04 | 6.28E-01 |
| 264.93509 | 41.25  | 24.29 | 25.54 | 25.78 | 25.62 | 8.63E-48  | 5.11E-15 | 5.11E-15 | 5.11E-15 | 3.17E-02 | 7.86E-01 | 3.02E-01 |
| 264.95287 | 19.76  | 21.60 | 26.48 | 26.49 | 25.67 | 3.45E-48  | 5.11E-15 | 5.11E-15 | 5.11E-15 | 1.00E+00 | 4.05E-02 | 3.77E-02 |
| 264.98226 | 38.72  | 15.10 | 14.76 | 14.37 | 14.93 | 8.04E-02  | 6.54E-01 | 5.54E-02 | 9.45E-01 | 5.38E-01 | 9.45E-01 | 2.45E-01 |
| 264.98975 | 20.78  | 18.53 | 19.64 | 19.90 | 19.69 | 3.12E-13  | 1.92E-08 | 2.98E-12 | 9.24E-09 | 4.91E-01 | 9.92E-01 | 6.93E-01 |
| 264.99882 | 20.61  | 17.63 | 18.93 | 19.44 | 19.16 | 7.52E-15  | 5.88E-08 | 8.06E-14 | 4.24E-10 | 1.01E-01 | 7.40E-01 | 6.16E-01 |
| 265.00339 | 21.56  | 16.87 | 16.93 | 17.05 | 17.14 | 3.79E-01  | 9.79E-01 | 6.80E-01 | 3.60E-01 | 8.98E-01 | 6.15E-01 | 9.47E-01 |
| 265.02163 | 26.86  | 17.31 | 18.02 | 18.02 | 18.27 | 5.59E-14  | 1.69E-08 | 1.46E-08 | 2.42E-13 | 1.00E+00 | 1.81E-01 | 1.64E-01 |
| 265.02696 | 25.38  | 17.67 | 19.03 | 19.01 | 18.35 | 1.11E-17  | 5.08E-14 | 5.22E-14 | 2.46E-04 | 1.00E+00 | 3.33E-04 | 4.25E-04 |
| 265.04849 | 23.87  | 16.82 | 15.90 | 16.45 | 16.15 | 8.21E-11  | 4.84E-11 | 1.82E-02 | 4.46E-06 | 2.12E-04 | 2.34E-01 | 1.26E-01 |
| 265.05035 | 287    | 17.10 | 10.39 | 10.36 | 11.21 | 5.51E-41  | 5.11E-15 | 5.11E-15 | 5.33E-15 | 1.00E+00 | 3.26E-01 | 2.79E-01 |
| 265.0847  | 290.56 | 16.83 | 15.96 | 16.00 | 15.57 | 3.40E-04  | 1.54E-02 | 2.24E-02 | 1.86E-04 | 9.99E-01 | 5.77E-01 | 4.78E-01 |
| 265.09461 | 118.7  | 15.56 | 14.11 | 14.20 | 14.43 | 4.92E-21  | 4.31E-14 | 4.37E-14 | 1.23E-11 | 9.32E-01 | 1.80E-01 | 4.61E-01 |
| 265.09477 | 21.03  | 14.63 | 12.84 | 12.90 | 13.59 | 2.50E-16  | 8.35E-14 | 1.88E-13 | 2.26E-05 | 9.93E-01 | 5.62E-03 | 1.21E-02 |
| 265.096   | 289.39 | 16.81 | 15.21 | 15.07 | 15.13 | 1.17E-08  | 3.26E-06 | 2.78E-07 | 1.97E-06 | 9.72E-01 | 9.96E-01 | 9.97E-01 |
| 265.10868 | 157.91 | 15.15 | 14.35 | 14.19 | 14.35 | 3.54E-07  | 7.26E-05 | 8.91E-07 | 1.03E-04 | 8.12E-01 | 1.00E+00 | 8.38E-01 |
| 265.1175  | 64.28  | 13.97 | 17.77 | 12.11 | 12.72 | 1.86E-137 | 5.11E-15 | 5.11E-15 | 5.33E-15 | 5.11E-15 | 5.11E-15 | 2.59E-08 |
| 265.12119 | 288.63 | 17.86 | 16.00 | 16.67 | 16.72 | 1.97E-11  | 3.35E-12 | 9.57E-06 | 5.08E-05 | 3.44E-02 | 2.54E-02 | 9.97E-01 |
| 265.14835 | 290.01 | 22.17 | 22.65 | 24.07 | 22.13 | 9.74E-45  | 3.06E-04 | 5.11E-15 | 9.83E-01 | 7.33E-15 | 1.72E-04 | 5.11E-15 |
| 265.14854 | 74.02  | 21.75 | 21.06 | 20.12 | 21.73 | 7.72E-16  | 2.94E-03 | 7.31E-14 | 1.00E+00 | 2.43E-05 | 7.49E-03 | 9.61E-13 |
| 265.18142 | 152.27 | 15.65 | 15.43 | 15.31 | 15.19 | 5.62E-03  | 3.13E-01 | 4.11E-02 | 3.92E-03 | 8.08E-01 | 3.23E-01 | 8.31E-01 |
| 265.21784 | 222.26 | 20.98 | 20.37 | 20.47 | 20.82 | 1.35E-10  | 2.22E-09 | 5.08E-07 | 3.03E-01 | 7.19E-01 | 5.83E-05 | 2.77E-03 |
| 265.9282  | 29.31  | 16.60 | 14.91 | 14.74 | 14.86 | 1.70E-07  | 2.16E-05 | 1.65E-06 | 2.00E-05 | 9.61E-01 | 9.99E-01 | 9.86E-01 |
| 265.93843 | 41.45  | 19.55 | 20.79 | 21.00 | 20.85 | 2.68E-44  | 5.11E-15 | 5.11E-15 | 5.11E-15 | 1.08E-01 | 9.44E-01 | 3.54E-01 |
| 265.95614 | 17.17  | 16.26 | 21.33 | 21.26 | 20.38 | 1.60E-46  | 5.11E-15 | 5.11E-15 | 5.11E-15 | 9.97E-01 | 2.03E-02 | 3.41E-02 |
| 265.9946  | 19.61  | 15.70 | 15.10 | 15.11 | 14.78 | 2.46E-03  | 6.39E-02 | 6.30E-02 | 1.22E-03 | 1.00E+00 | 5.64E-01 | 5.47E-01 |
| 266.00557 | 22.61  | 17.53 | 18.28 | 17.79 | 18.22 | 9.04E-12  | 2.97E-10 | 7.26E-02 | 2.08E-08 | 9.49E-05 | 9.42E-01 | 1.39E-03 |
| 266.02649 | 30.04  | 13.61 | 13.62 | 13.76 | 13.86 | 8.92E-01  | 1.00E+00 | 9.74E-01 | 9.08E-01 | 9.77E-01 | 9.17E-01 | 9.94E-01 |
| 266.03779 | 32.55  | 15.72 | 16.14 | 16.06 | 16.15 | 6.35E-04  | 2.41E-03 | 1.61E-02 | 2.02E-03 | 9.33E-01 | 9.99E-01 | 8.89E-01 |
| 266.06295 | 32.21  | 17.06 | 16.04 | 16.08 | 16.11 | 6.88E-13  | 1.57E-10 | 6.47E-10 | 6.83E-09 | 9.90E-01 | 9.65E-01 | 9.98E-01 |
| 266.07658 | 30.89  | 14.12 | 15.87 | 15.99 | 15.80 | 4.32E-20  | 4.87E-14 | 4.27E-14 | 2.53E-13 | 9.37E-01 | 9.86E-01 | 7.96E-01 |
| 266.09009 | 29.63  | 19.30 | 20.50 | 20.43 | 19.93 | 2.42E-13  | 8.62E-12 | 8.68E-11 | 7.98E-04 | 9.71E-01 | 5.21E-03 | 1.86E-02 |
| 266.10546 | 163.13 | 15.07 | 14.36 | 14.18 | 14.43 | 2.22E-07  | 6.38E-05 | 2.11E-07 | 5.84E-04 | 6.68E-01 | 9.75E-01 | 4.22E-01 |
| 266.11621 | 281.47 | 20.11 | 17.82 | 18.09 | 18.21 | 1.36E-54  | 5.11E-15 | 5.11E-15 | 5.11E-15 | 1.10E-01 | 1.13E-02 | 7.89E-01 |
| 266.15155 | 287.29 | 18.13 | 18.62 | 20.41 | 18.22 | 2.66E-43  | 3.06E-03 | 5.11E-15 | 9.08E-01 | 5.33E-15 | 4.01E-02 | 5.11E-15 |
| 266.15188 | 77.16  | 18.54 | 17.50 | 16.91 | 18.56 | 2.23E-10  | 6.44E-04 | 1.31E-08 | 1.00E+00 | 1.25E-01 | 1.05E-03 | 5.10E-08 |
| 266.22091 | 218.42 | 18.14 | 17.26 | 17.46 | 17.88 | 3.56E-13  | 2.68E-12 | 4.60E-08 | 1.21E-01 | 3.16E-01 | 3.52E-06 | 3.01E-03 |

|           |        |       |       |       |       |          |          |          |          |          |          |          |
|-----------|--------|-------|-------|-------|-------|----------|----------|----------|----------|----------|----------|----------|
| 266.87248 | 54.42  | 22.85 | 23.30 | 23.72 | 23.44 | 3.04E-24 | 1.99E-08 | 7.33E-15 | 1.44E-12 | 2.94E-07 | 3.00E-01 | 1.30E-03 |
| 266.88052 | 28.72  | 13.38 | 13.82 | 14.04 | 13.18 | 3.19E-01 | 8.03E-01 | 5.33E-01 | 9.78E-01 | 9.74E-01 | 5.99E-01 | 3.43E-01 |
| 266.88683 | 120.65 | 15.07 | 12.92 | 11.82 | 13.58 | 1.36E-19 | 3.72E-10 | 3.80E-14 | 3.42E-05 | 3.51E-03 | 1.91E-01 | 1.03E-06 |
| 266.91131 | 87.34  | 16.45 | 15.14 | 15.51 | 15.81 | 2.49E-19 | 4.19E-14 | 1.75E-11 | 1.32E-05 | 2.27E-02 | 6.91E-06 | 1.17E-01 |
| 266.93219 | 43.19  | 20.19 | 21.47 | 21.62 | 21.50 | 3.95E-39 | 5.11E-15 | 5.11E-15 | 5.11E-15 | 4.60E-01 | 9.92E-01 | 6.60E-01 |
| 266.93919 | 47.82  | 17.61 | 18.85 | 19.09 | 18.95 | 8.93E-49 | 5.11E-15 | 5.11E-15 | 5.11E-15 | 3.39E-02 | 7.18E-01 | 3.79E-01 |
| 266.96865 | 20.06  | 17.68 | 20.01 | 20.10 | 20.29 | 1.88E-17 | 3.49E-12 | 3.32E-13 | 8.26E-14 | 9.89E-01 | 8.12E-01 | 9.36E-01 |
| 266.98544 | 20.33  | 15.10 | 15.44 | 16.13 | 15.63 | 8.10E-04 | 5.33E-01 | 2.73E-04 | 1.75E-01 | 3.63E-02 | 8.93E-01 | 2.19E-01 |
| 267.00126 | 21.33  | 17.47 | 17.27 | 17.42 | 17.49 | 6.12E-01 | 6.63E-01 | 9.91E-01 | 9.99E-01 | 8.37E-01 | 6.22E-01 | 9.78E-01 |
| 267.02554 | 159    | 14.19 | 11.52 | 12.81 | 13.13 | 4.15E-13 | 7.37E-14 | 9.53E-05 | 7.28E-03 | 5.42E-04 | 1.52E-05 | 7.56E-01 |
| 267.06611 | 289.42 | 21.89 | 17.58 | 17.88 | 18.40 | 1.40E-58 | 5.11E-15 | 5.11E-15 | 5.11E-15 | 4.95E-01 | 1.49E-03 | 8.68E-02 |
| 267.06709 | 79.92  | 15.78 | 12.57 | 14.69 | 13.59 | 3.18E-12 | 2.17E-12 | 4.25E-02 | 3.52E-06 | 6.55E-06 | 9.37E-02 | 5.71E-02 |
| 267.07431 | 22.07  | 25.34 | 25.05 | 25.56 | 25.62 | 4.51E-02 | 5.20E-01 | 7.09E-01 | 5.58E-01 | 8.42E-02 | 5.24E-02 | 9.93E-01 |
| 267.10014 | 290.53 | 18.29 | 16.67 | 16.57 | 16.90 | 3.19E-27 | 3.29E-14 | 1.29E-14 | 4.29E-14 | 8.98E-01 | 4.74E-01 | 1.45E-01 |
| 267.11181 | 289.86 | 16.54 | 12.52 | 12.82 | 14.28 | 3.51E-15 | 1.78E-13 | 4.10E-12 | 7.05E-05 | 9.30E-01 | 4.42E-03 | 2.55E-02 |
| 267.12439 | 132.59 | 15.07 | 14.47 | 14.59 | 14.70 | 4.45E-03 | 3.32E-03 | 2.74E-02 | 1.69E-01 | 9.03E-01 | 5.67E-01 | 9.19E-01 |
| 267.13719 | 219.58 | 15.92 | 9.54  | 9.39  | 10.15 | 7.65E-88 | 5.11E-15 | 5.11E-15 | 5.11E-15 | 9.25E-01 | 4.50E-02 | 7.09E-03 |
| 267.14462 | 69.9   | 16.66 | 14.05 | 14.92 | 16.49 | 6.24E-14 | 5.83E-12 | 4.28E-06 | 9.64E-01 | 6.73E-02 | 9.17E-10 | 1.14E-04 |
| 267.16058 | 191.54 | 16.77 | 15.98 | 16.36 | 16.33 | 7.12E-07 | 9.48E-08 | 1.39E-02 | 9.93E-03 | 2.83E-02 | 6.27E-02 | 9.97E-01 |
| 267.19716 | 190.44 | 18.34 | 17.66 | 17.60 | 17.38 | 1.42E-07 | 2.76E-04 | 4.46E-05 | 1.93E-07 | 9.80E-01 | 3.57E-01 | 5.76E-01 |
| 267.23357 | 252.38 | 24.99 | 24.64 | 24.49 | 25.03 | 9.45E-08 | 3.02E-03 | 5.68E-06 | 9.87E-01 | 4.66E-01 | 1.85E-03 | 4.33E-06 |
| 267.87586 | 58.42  | 17.37 | 17.44 | 18.31 | 17.93 | 1.34E-27 | 8.43E-01 | 1.02E-14 | 6.28E-10 | 3.71E-14 | 1.23E-07 | 6.24E-05 |
| 267.93651 | 47.6   | 14.87 | 16.00 | 16.18 | 16.15 | 7.37E-25 | 4.41E-14 | 3.51E-14 | 4.26E-14 | 4.72E-01 | 6.63E-01 | 9.94E-01 |
| 267.96244 | 32.31  | 16.02 | 14.52 | 14.95 | 14.83 | 7.46E-03 | 6.03E-03 | 8.29E-02 | 5.39E-02 | 7.92E-01 | 9.17E-01 | 9.94E-01 |
| 268.04685 | 130.36 | 16.09 | 15.30 | 15.11 | 15.60 | 1.32E-13 | 3.62E-09 | 2.76E-13 | 8.17E-04 | 4.31E-01 | 8.52E-02 | 8.18E-04 |
| 268.0715  | 24.92  | 18.56 | 17.77 | 18.35 | 18.46 | 5.31E-05 | 4.24E-05 | 5.95E-01 | 9.32E-01 | 6.33E-03 | 1.17E-03 | 9.33E-01 |
| 268.07763 | 23.34  | 21.94 | 21.50 | 21.99 | 22.10 | 6.91E-02 | 2.20E-01 | 9.97E-01 | 9.03E-01 | 1.62E-01 | 6.40E-02 | 9.63E-01 |
| 268.09581 | 294.28 | 17.82 | 17.11 | 17.00 | 16.93 | 1.43E-13 | 3.35E-08 | 1.13E-10 | 1.57E-11 | 7.89E-01 | 4.63E-01 | 9.42E-01 |
| 268.10455 | 27.21  | 14.42 | 14.43 | 14.52 | 14.58 | 9.68E-01 | 1.00E+00 | 9.92E-01 | 9.69E-01 | 9.95E-01 | 9.79E-01 | 9.98E-01 |
| 268.11675 | 167.71 | 15.83 | 18.61 | 18.90 | 18.31 | 2.72E-34 | 6.00E-15 | 5.11E-15 | 3.35E-14 | 5.93E-01 | 5.99E-01 | 6.60E-02 |
| 268.13187 | 289.85 | 16.97 | 16.38 | 15.94 | 15.25 | 6.40E-04 | 4.59E-01 | 4.99E-02 | 2.73E-04 | 7.04E-01 | 4.27E-02 | 3.69E-01 |
| 268.20003 | 174.42 | 15.16 | 15.09 | 14.72 | 14.58 | 3.96E-03 | 9.78E-01 | 6.58E-02 | 9.15E-03 | 1.86E-01 | 3.63E-02 | 8.69E-01 |
| 268.20047 | 48.61  | 14.61 | 14.04 | 14.42 | 14.42 | 6.27E-01 | 5.54E-01 | 9.68E-01 | 9.72E-01 | 8.34E-01 | 8.45E-01 | 1.00E+00 |
| 268.23691 | 252.89 | 22.53 | 22.13 | 21.96 | 22.49 | 6.40E-08 | 9.98E-04 | 8.65E-07 | 9.87E-01 | 4.19E-01 | 6.31E-03 | 1.60E-05 |
| 268.8438  | 240.03 | 15.96 | 14.53 | 15.38 | 16.02 | 2.51E-05 | 8.44E-05 | 2.70E-01 | 9.98E-01 | 5.01E-02 | 1.06E-04 | 2.33E-01 |
| 268.87065 | 63.4   | 20.45 | 20.76 | 21.31 | 21.01 | 1.43E-23 | 2.85E-04 | 1.09E-14 | 4.63E-11 | 3.49E-11 | 1.13E-02 | 5.68E-04 |
| 268.87671 | 82.19  | 15.26 | 15.21 | 15.43 | 15.27 | 2.13E-01 | 9.66E-01 | 3.72E-01 | 9.98E-01 | 1.81E-01 | 9.28E-01 | 5.26E-01 |
| 268.88803 | 52.24  | 22.43 | 22.67 | 23.36 | 23.13 | 1.76E-31 | 4.41E-03 | 5.11E-15 | 4.37E-14 | 4.30E-14 | 2.40E-08 | 9.89E-03 |
| 268.89615 | 25.73  | 15.19 | 15.45 | 15.54 | 14.75 | 5.59E-03 | 6.61E-01 | 3.90E-01 | 2.32E-01 | 9.76E-01 | 1.93E-02 | 5.00E-03 |
| 268.92521 | 159.31 | 12.67 | 13.42 | 12.23 | 14.09 | 1.17E-03 | 3.77E-01 | 7.85E-01 | 1.78E-02 | 6.51E-02 | 5.28E-01 | 1.10E-03 |
| 268.93236 | 148.17 | 15.17 | 14.97 | 15.06 | 15.15 | 6.29E-01 | 6.20E-01 | 9.21E-01 | 9.99E-01 | 9.40E-01 | 7.28E-01 | 9.62E-01 |
| 268.94197 | 30.65  | 15.62 | 15.41 | 15.49 | 15.54 | 6.08E-01 | 5.42E-01 | 8.45E-01 | 9.60E-01 | 9.56E-01 | 8.62E-01 | 9.91E-01 |
| 268.97472 | 18.53  | 15.77 | 17.61 | 17.42 | 17.06 | 2.00E-11 | 1.69E-10 | 7.32E-09 | 1.87E-05 | 8.93E-01 | 1.92E-01 | 5.51E-01 |
| 268.98429 | 19.61  | 16.51 | 18.63 | 18.62 | 18.47 | 2.12E-19 | 4.53E-14 | 4.46E-14 | 6.13E-13 | 1.00E+00 | 9.23E-01 | 9.25E-01 |
| 269.04593 | 41.75  | 15.44 | 15.07 | 16.05 | 14.95 | 3.56E-02 | 7.77E-01 | 4.02E-01 | 6.16E-01 | 7.09E-02 | 9.92E-01 | 3.97E-02 |

|           |        |       |       |       |       |          |          |          |          |          |          |          |
|-----------|--------|-------|-------|-------|-------|----------|----------|----------|----------|----------|----------|----------|
| 269.05398 | 39.98  | 11.84 | 13.13 | 11.87 | 14.02 | 1.21E-02 | 2.97E-01 | 1.00E+00 | 2.19E-02 | 3.38E-01 | 6.63E-01 | 2.91E-02 |
| 269.07876 | 24.03  | 17.86 | 16.83 | 17.47 | 17.63 | 3.82E-06 | 1.35E-06 | 1.78E-01 | 6.48E-01 | 7.00E-03 | 6.52E-04 | 8.62E-01 |
| 269.07992 | 214.58 | 14.38 | 8.82  | 8.92  | 9.47  | 1.87E-30 | 7.55E-15 | 8.88E-15 | 3.92E-14 | 9.97E-01 | 5.58E-01 | 6.70E-01 |
| 269.08867 | 27.5   | 21.49 | 22.29 | 22.09 | 21.84 | 1.10E-04 | 6.90E-05 | 4.62E-03 | 2.31E-01 | 6.86E-01 | 7.95E-02 | 5.36E-01 |
| 269.10361 | 152.65 | 15.16 | 14.70 | 15.37 | 14.91 | 4.47E-03 | 6.89E-02 | 6.83E-01 | 5.68E-01 | 3.24E-03 | 7.05E-01 | 9.63E-02 |
| 269.11608 | 289.29 | 17.53 | 15.44 | 16.32 | 15.47 | 1.12E-10 | 2.22E-09 | 9.83E-04 | 9.60E-09 | 3.51E-02 | 1.00E+00 | 5.38E-02 |
| 269.1222  | 31.11  | 16.21 | 17.75 | 16.36 | 17.47 | 5.43E-08 | 1.82E-06 | 9.49E-01 | 2.09E-04 | 3.34E-05 | 8.03E-01 | 2.00E-03 |
| 269.13998 | 185.69 | 16.63 | 16.51 | 16.62 | 16.43 | 2.63E-01 | 6.88E-01 | 9.98E-01 | 2.82E-01 | 7.96E-01 | 8.99E-01 | 3.84E-01 |
| 269.21259 | 269.39 | 22.22 | 22.72 | 22.83 | 22.52 | 5.56E-03 | 3.45E-02 | 4.32E-03 | 3.90E-01 | 9.21E-01 | 7.23E-01 | 3.41E-01 |
| 269.24024 | 247.81 | 18.41 | 17.69 | 17.49 | 18.11 | 9.33E-12 | 3.10E-07 | 3.38E-11 | 1.04E-01 | 4.12E-01 | 1.10E-02 | 3.32E-05 |
| 269.24897 | 277.45 | 25.42 | 24.92 | 25.04 | 25.47 | 1.84E-10 | 1.72E-07 | 8.14E-05 | 9.65E-01 | 5.49E-01 | 7.44E-08 | 3.01E-05 |
| 269.87396 | 75.72  | 14.93 | 13.97 | 14.94 | 14.61 | 3.59E-11 | 7.61E-10 | 9.99E-01 | 1.35E-01 | 8.19E-10 | 1.56E-04 | 1.13E-01 |
| 269.89152 | 60.51  | 16.92 | 16.50 | 17.92 | 17.60 | 3.29E-31 | 6.47E-04 | 4.35E-14 | 1.08E-08 | 5.11E-15 | 4.23E-14 | 2.22E-02 |
| 270.04959 | 70.76  | 13.48 | 14.36 | 15.46 | 15.83 | 3.58E-12 | 3.06E-02 | 1.15E-08 | 5.46E-11 | 4.91E-03 | 1.06E-04 | 6.69E-01 |
| 270.06247 | 132.93 | 15.82 | 14.04 | 14.32 | 15.06 | 4.14E-17 | 4.34E-14 | 4.16E-12 | 1.29E-03 | 4.95E-01 | 1.18E-05 | 2.63E-03 |
| 270.07542 | 171    | 13.50 | 12.99 | 13.17 | 13.58 | 4.87E-01 | 6.20E-01 | 8.55E-01 | 9.97E-01 | 9.76E-01 | 5.35E-01 | 7.76E-01 |
| 270.07555 | 19.89  | 15.16 | 16.70 | 16.30 | 16.54 | 1.30E-12 | 1.40E-11 | 5.06E-07 | 3.42E-09 | 2.30E-01 | 8.82E-01 | 6.81E-01 |
| 270.09211 | 28.06  | 17.70 | 18.50 | 18.23 | 17.98 | 1.02E-03 | 5.29E-04 | 4.11E-02 | 5.20E-01 | 5.51E-01 | 7.18E-02 | 6.41E-01 |
| 270.09962 | 207.33 | 17.55 | 15.64 | 15.62 | 16.24 | 1.34E-23 | 4.21E-14 | 3.91E-14 | 4.49E-10 | 9.99E-01 | 1.29E-02 | 7.72E-03 |
| 270.11099 | 293.59 | 17.45 | 17.08 | 17.06 | 17.14 | 3.89E-03 | 1.24E-02 | 6.55E-03 | 5.61E-02 | 9.98E-01 | 9.71E-01 | 9.28E-01 |
| 270.20818 | 149.96 | 15.25 | 14.54 | 14.35 | 14.62 | 3.86E-09 | 5.26E-06 | 3.79E-09 | 1.12E-04 | 5.50E-01 | 9.48E-01 | 2.58E-01 |
| 270.20831 | 23.04  | 14.12 | 12.91 | 11.88 | 14.13 | 4.98E-10 | 4.46E-03 | 9.32E-09 | 1.00E+00 | 2.89E-02 | 7.65E-03 | 5.22E-08 |
| 270.21595 | 234.16 | 19.36 | 18.93 | 19.11 | 18.98 | 2.85E-02 | 2.70E-02 | 3.41E-01 | 7.94E-02 | 6.68E-01 | 9.87E-01 | 8.66E-01 |
| 270.25229 | 278.95 | 22.96 | 22.42 | 22.50 | 22.90 | 8.36E-09 | 4.97E-07 | 2.53E-05 | 9.30E-01 | 8.27E-01 | 3.11E-05 | 8.17E-04 |
| 270.84931 | 80.13  | 15.65 | 16.83 | 17.04 | 16.97 | 7.92E-29 | 4.37E-14 | 7.77E-15 | 2.91E-14 | 2.87E-01 | 6.66E-01 | 9.37E-01 |
| 270.86875 | 73.84  | 16.06 | 15.50 | 16.53 | 16.19 | 1.35E-29 | 3.92E-12 | 3.07E-09 | 2.88E-01 | 5.11E-15 | 4.26E-14 | 9.11E-05 |
| 270.88029 | 45.99  | 19.17 | 18.03 | 18.93 | 18.51 | 3.35E-09 | 3.09E-09 | 4.99E-01 | 1.60E-03 | 6.55E-06 | 5.15E-02 | 1.03E-01 |
| 270.88628 | 52.16  | 20.01 | 20.17 | 20.93 | 20.67 | 2.71E-31 | 1.16E-01 | 5.11E-15 | 4.40E-14 | 4.00E-14 | 1.65E-09 | 3.59E-03 |
| 270.89205 | 50.71  | 17.54 | 18.51 | 18.93 | 18.62 | 7.44E-20 | 1.35E-10 | 4.20E-14 | 2.59E-12 | 1.60E-02 | 8.47E-01 | 1.56E-01 |
| 270.90109 | 37.01  | 20.77 | 21.14 | 21.47 | 21.45 | 7.98E-11 | 2.92E-03 | 1.19E-09 | 1.23E-08 | 1.45E-02 | 3.29E-02 | 9.98E-01 |
| 270.94306 | 164.56 | 16.60 | 13.41 | 12.70 | 14.33 | 1.06E-31 | 2.33E-14 | 5.11E-15 | 2.37E-12 | 7.85E-02 | 1.35E-02 | 8.99E-07 |
| 270.9871  | 23.59  | 17.46 | 19.33 | 19.29 | 19.50 | 1.53E-23 | 4.16E-14 | 4.40E-14 | 4.31E-14 | 9.98E-01 | 8.31E-01 | 7.40E-01 |
| 271.00533 | 24.94  | 24.54 | 24.20 | 24.34 | 24.24 | 2.35E-03 | 2.66E-03 | 1.45E-01 | 1.13E-02 | 4.99E-01 | 9.87E-01 | 7.33E-01 |
| 271.05945 | 17.01  | 19.45 | 18.69 | 18.43 | 18.19 | 3.96E-09 | 6.02E-04 | 1.68E-06 | 6.52E-09 | 5.82E-01 | 7.07E-02 | 6.08E-01 |
| 271.0706  | 23.8   | 18.57 | 17.85 | 18.08 | 18.26 | 3.15E-08 | 1.01E-08 | 1.36E-04 | 4.28E-02 | 2.04E-01 | 4.62E-03 | 4.42E-01 |
| 271.09514 | 289.69 | 16.90 | 12.49 | 13.77 | 13.40 | 7.20E-15 | 6.42E-14 | 2.90E-08 | 2.17E-09 | 7.89E-02 | 3.46E-01 | 9.08E-01 |
| 271.0954  | 214.83 | 16.73 | 8.99  | 9.55  | 10.14 | 1.42E-42 | 5.11E-15 | 5.11E-15 | 5.11E-15 | 6.77E-01 | 1.22E-01 | 6.63E-01 |
| 271.10556 | 17.17  | 15.08 | 13.59 | 15.23 | 15.12 | 6.10E-05 | 6.65E-04 | 9.79E-01 | 9.99E-01 | 2.00E-04 | 9.51E-04 | 9.94E-01 |
| 271.11896 | 174.28 | 16.08 | 15.77 | 16.16 | 15.84 | 1.85E-01 | 4.16E-01 | 9.79E-01 | 6.33E-01 | 2.35E-01 | 9.91E-01 | 4.14E-01 |
| 271.15568 | 176.43 | 16.95 | 16.56 | 16.80 | 16.41 | 1.25E-05 | 2.73E-03 | 4.68E-01 | 1.45E-05 | 1.70E-01 | 5.31E-01 | 4.85E-03 |
| 271.19221 | 18.28  | 16.58 | 15.67 | 16.08 | 16.02 | 1.51E-08 | 2.09E-09 | 2.33E-03 | 6.83E-04 | 1.77E-02 | 7.61E-02 | 9.70E-01 |
| 271.20774 | 25.63  | 16.69 | 13.97 | 15.41 | 16.98 | 1.97E-11 | 2.74E-09 | 1.20E-02 | 9.02E-01 | 4.50E-03 | 4.25E-10 | 2.20E-03 |
| 271.21966 | 180.74 | 16.01 | 15.28 | 15.09 | 15.61 | 1.26E-10 | 5.87E-07 | 1.66E-10 | 1.72E-02 | 4.95E-01 | 9.33E-02 | 1.39E-03 |
| 271.22833 | 209.59 | 21.94 | 21.68 | 20.78 | 20.74 | 3.38E-21 | 2.20E-01 | 4.22E-14 | 4.29E-14 | 7.98E-10 | 5.47E-10 | 9.92E-01 |
| 271.2558  | 278.71 | 18.68 | 17.76 | 17.87 | 18.44 | 2.22E-14 | 3.58E-12 | 7.79E-10 | 2.07E-01 | 7.76E-01 | 1.29E-06 | 7.36E-05 |

|           |        |       |       |       |       |          |          |          |          |          |          |          |
|-----------|--------|-------|-------|-------|-------|----------|----------|----------|----------|----------|----------|----------|
| 271.88953 | 65.66  | 14.62 | 12.38 | 14.32 | 14.66 | 6.89E-28 | 1.15E-14 | 3.92E-01 | 9.97E-01 | 4.33E-14 | 2.07E-14 | 3.31E-01 |
| 272.00159 | 17.78  | 18.97 | 19.18 | 19.25 | 19.63 | 9.00E-03 | 6.70E-01 | 4.02E-01 | 3.65E-03 | 9.77E-01 | 1.04E-01 | 2.26E-01 |
| 272.00833 | 24.68  | 19.96 | 19.56 | 19.68 | 19.62 | 6.76E-05 | 7.10E-05 | 1.26E-02 | 1.57E-03 | 4.99E-01 | 9.15E-01 | 8.93E-01 |
| 272.0551  | 20.95  | 16.42 | 16.81 | 16.67 | 16.61 | 4.57E-03 | 1.88E-03 | 9.06E-02 | 3.21E-01 | 5.68E-01 | 2.79E-01 | 9.47E-01 |
| 272.06502 | 20.84  | 15.81 | 16.14 | 16.27 | 16.12 | 1.43E-01 | 3.66E-01 | 1.10E-01 | 4.44E-01 | 9.30E-01 | 1.00E+00 | 9.04E-01 |
| 272.07833 | 148.67 | 16.64 | 14.93 | 14.74 | 15.53 | 1.99E-21 | 4.24E-14 | 4.11E-14 | 1.48E-07 | 7.47E-01 | 1.32E-02 | 3.86E-04 |
| 272.11616 | 214.98 | 15.42 | 7.80  | 7.85  | 8.65  | 4.06E-64 | 5.11E-15 | 5.11E-15 | 5.11E-15 | 9.99E-01 | 1.13E-01 | 1.44E-01 |
| 272.12588 | 290.06 | 15.41 | 14.20 | 14.54 | 15.96 | 9.04E-03 | 1.14E-01 | 3.69E-01 | 7.55E-01 | 9.24E-01 | 1.19E-02 | 6.14E-02 |
| 272.2317  | 200.26 | 19.37 | 19.14 | 18.29 | 18.44 | 8.19E-16 | 3.23E-01 | 3.05E-13 | 9.22E-10 | 1.95E-08 | 1.01E-05 | 7.16E-01 |
| 272.8385  | 96.59  | 14.96 | 14.59 | 14.96 | 15.08 | 9.12E-04 | 1.12E-02 | 1.00E+00 | 7.72E-01 | 1.48E-02 | 7.79E-04 | 7.67E-01 |
| 272.84741 | 91.78  | 13.34 | 13.89 | 13.74 | 13.88 | 3.62E-03 | 6.71E-03 | 7.76E-02 | 9.78E-03 | 8.22E-01 | 1.00E+00 | 8.49E-01 |
| 272.86514 | 88.72  | 14.04 | 14.83 | 15.22 | 15.37 | 3.51E-06 | 1.48E-02 | 5.28E-05 | 9.55E-06 | 4.68E-01 | 2.18E-01 | 9.52E-01 |
| 272.87762 | 47.29  | 17.64 | 16.02 | 17.08 | 16.55 | 5.94E-12 | 3.19E-12 | 3.69E-02 | 5.61E-06 | 1.11E-05 | 8.62E-02 | 8.20E-02 |
| 272.88413 | 34.58  | 15.72 | 14.15 | 15.95 | 15.70 | 6.40E-17 | 1.21E-12 | 6.66E-01 | 1.00E+00 | 4.66E-14 | 2.70E-11 | 6.37E-01 |
| 272.89345 | 139.2  | 13.51 | 13.29 | 12.70 | 14.63 | 1.38E-03 | 9.65E-01 | 2.88E-01 | 8.56E-02 | 5.88E-01 | 3.21E-02 | 4.84E-04 |
| 272.90118 | 138.4  | 21.45 | 19.90 | 19.28 | 20.26 | 3.37E-36 | 2.62E-14 | 5.11E-15 | 1.39E-13 | 1.67E-04 | 6.45E-02 | 1.16E-09 |
| 272.94494 | 19.28  | 16.86 | 16.55 | 16.82 | 17.32 | 2.53E-03 | 3.68E-01 | 9.97E-01 | 8.45E-02 | 5.12E-01 | 8.83E-04 | 5.74E-02 |
| 272.95856 | 152.2  | 17.81 | 15.73 | 15.34 | 16.59 | 8.24E-27 | 4.34E-14 | 7.33E-15 | 1.49E-07 | 2.63E-01 | 5.89E-04 | 1.57E-07 |
| 273.00289 | 19.74  | 21.38 | 21.71 | 21.76 | 21.67 | 3.46E-07 | 2.14E-05 | 9.25E-07 | 4.52E-04 | 9.30E-01 | 9.35E-01 | 6.37E-01 |
| 273.0091  | 24.35  | 17.48 | 16.75 | 17.00 | 16.92 | 1.60E-10 | 1.25E-10 | 3.35E-05 | 1.54E-06 | 7.85E-02 | 4.24E-01 | 8.49E-01 |
| 273.0863  | 72.01  | 13.43 | 13.18 | 14.61 | 15.33 | 3.02E-10 | 8.64E-01 | 1.59E-03 | 1.90E-07 | 1.23E-04 | 8.62E-09 | 1.46E-01 |
| 273.09322 | 22.75  | 18.88 | 19.17 | 19.24 | 18.89 | 3.48E-02 | 2.17E-01 | 7.86E-02 | 1.00E+00 | 9.71E-01 | 2.81E-01 | 1.16E-01 |
| 273.09869 | 151.78 | 15.24 | 15.81 | 16.00 | 15.56 | 3.72E-10 | 2.74E-06 | 2.95E-10 | 2.40E-02 | 3.68E-01 | 1.41E-01 | 1.29E-03 |
| 273.0998  | 17.62  | 14.53 | 14.19 | 14.15 | 13.95 | 3.19E-02 | 2.80E-01 | 1.93E-01 | 1.89E-02 | 9.98E-01 | 6.51E-01 | 7.52E-01 |
| 273.11129 | 212.06 | 17.13 | 12.59 | 11.92 | 13.66 | 9.20E-27 | 3.99E-14 | 7.55E-15 | 2.59E-12 | 4.49E-01 | 9.92E-02 | 1.17E-03 |
| 273.11142 | 33.2   | 15.57 | 10.29 | 10.19 | 11.69 | 4.17E-26 | 3.02E-14 | 2.18E-14 | 1.55E-12 | 9.97E-01 | 3.28E-02 | 1.79E-02 |
| 273.13495 | 166.28 | 16.32 | 16.18 | 16.55 | 15.82 | 1.26E-05 | 7.46E-01 | 3.04E-01 | 2.44E-03 | 3.95E-02 | 5.96E-02 | 3.37E-06 |
| 273.17132 | 155.41 | 15.10 | 14.35 | 14.33 | 14.46 | 8.31E-06 | 8.93E-05 | 4.09E-05 | 1.53E-03 | 9.99E-01 | 9.34E-01 | 8.85E-01 |
| 273.18669 | 114.6  | 15.38 | 13.70 | 14.46 | 14.23 | 1.01E-18 | 4.20E-14 | 3.45E-07 | 6.91E-10 | 5.26E-05 | 1.20E-02 | 5.51E-01 |
| 273.20775 | 200.87 | 19.40 | 18.65 | 18.80 | 19.07 | 2.85E-09 | 4.47E-09 | 2.77E-06 | 3.65E-02 | 5.85E-01 | 3.49E-03 | 1.10E-01 |
| 273.2352  | 166.79 | 14.90 | 14.58 | 14.55 | 14.77 | 2.29E-01 | 3.32E-01 | 2.61E-01 | 9.03E-01 | 9.99E-01 | 7.87E-01 | 7.13E-01 |
| 273.97196 | 28.82  | 14.02 | 14.42 | 14.74 | 14.88 | 3.75E-02 | 5.67E-01 | 9.72E-02 | 3.78E-02 | 7.61E-01 | 5.05E-01 | 9.70E-01 |
| 273.99766 | 23.36  | 16.77 | 16.90 | 16.90 | 16.59 | 2.01E-01 | 8.44E-01 | 8.13E-01 | 6.83E-01 | 1.00E+00 | 2.48E-01 | 2.20E-01 |
| 274.00558 | 21.87  | 17.03 | 17.32 | 17.32 | 17.25 | 1.67E-03 | 4.60E-03 | 3.48E-03 | 5.57E-02 | 1.00E+00 | 8.83E-01 | 8.60E-01 |
| 274.02197 | 29.26  | 13.88 | 14.77 | 14.93 | 14.51 | 2.35E-04 | 2.81E-03 | 2.12E-04 | 7.26E-02 | 9.22E-01 | 7.64E-01 | 3.82E-01 |
| 274.08377 | 76.44  | 14.34 | 15.24 | 16.41 | 16.63 | 1.01E-32 | 2.37E-06 | 6.88E-15 | 5.11E-15 | 1.32E-09 | 4.73E-12 | 6.38E-01 |
| 274.09371 | 287.63 | 19.09 | 18.15 | 18.13 | 18.63 | 1.02E-18 | 4.62E-14 | 4.27E-14 | 2.68E-04 | 9.98E-01 | 1.90E-04 | 7.59E-05 |
| 274.10551 | 18.71  | 21.23 | 21.91 | 22.00 | 21.84 | 6.32E-08 | 6.80E-06 | 2.46E-07 | 1.03E-04 | 9.27E-01 | 9.65E-01 | 7.03E-01 |
| 274.12475 | 31.91  | 17.43 | 16.62 | 17.08 | 16.77 | 5.84E-04 | 5.10E-04 | 2.96E-01 | 9.47E-03 | 1.25E-01 | 8.94E-01 | 4.76E-01 |
| 274.13181 | 209.78 | 15.17 | 10.22 | 10.22 | 11.76 | 8.43E-20 | 4.42E-14 | 4.35E-14 | 1.51E-08 | 1.00E+00 | 3.49E-02 | 3.19E-02 |
| 274.14193 | 21.88  | 16.14 | 17.02 | 17.09 | 16.85 | 3.26E-08 | 1.65E-06 | 1.64E-07 | 2.86E-04 | 9.78E-01 | 7.50E-01 | 5.02E-01 |
| 274.17812 | 27.06  | 12.97 | 13.83 | 14.20 | 13.98 | 3.01E-04 | 2.15E-02 | 2.50E-04 | 5.88E-03 | 6.18E-01 | 9.64E-01 | 8.96E-01 |
| 274.21101 | 201.76 | 16.27 | 15.10 | 15.12 | 15.60 | 7.62E-13 | 4.90E-11 | 7.61E-11 | 4.26E-04 | 9.99E-01 | 2.02E-02 | 2.77E-02 |
| 274.84466 | 92.94  | 13.57 | 14.19 | 13.96 | 13.95 | 3.75E-03 | 1.57E-03 | 8.69E-02 | 1.26E-01 | 5.48E-01 | 5.26E-01 | 1.00E+00 |
| 274.88888 | 19.44  | 15.51 | 16.30 | 15.69 | 17.11 | 5.46E-13 | 6.31E-04 | 8.08E-01 | 2.33E-12 | 1.62E-02 | 1.13E-03 | 8.46E-10 |

|           |        |       |       |       |       |          |          |          |          |          |          |          |
|-----------|--------|-------|-------|-------|-------|----------|----------|----------|----------|----------|----------|----------|
| 274.89946 | 118.56 | 16.36 | 14.58 | 14.74 | 14.94 | 4.89E-26 | 2.00E-14 | 4.09E-14 | 4.69E-14 | 7.72E-01 | 1.38E-01 | 6.01E-01 |
| 274.91685 | 134.19 | 19.18 | 19.09 | 19.87 | 19.16 | 6.53E-02 | 9.92E-01 | 1.35E-01 | 1.00E+00 | 8.41E-02 | 9.97E-01 | 1.53E-01 |
| 274.95586 | 27.59  | 14.80 | 15.87 | 15.99 | 15.20 | 4.27E-05 | 9.17E-04 | 1.25E-04 | 5.03E-01 | 9.69E-01 | 1.05E-01 | 3.30E-02 |
| 274.98901 | 18.66  | 13.48 | 14.82 | 13.50 | 13.06 | 3.86E-06 | 3.26E-04 | 1.00E+00 | 5.86E-01 | 5.50E-04 | 3.86E-06 | 5.70E-01 |
| 275.05514 | 23.29  | 17.05 | 17.10 | 17.03 | 17.15 | 4.91E-01 | 9.08E-01 | 9.99E-01 | 5.80E-01 | 8.54E-01 | 9.31E-01 | 5.07E-01 |
| 275.08938 | 18.17  | 20.02 | 21.79 | 21.89 | 22.06 | 6.19E-18 | 3.64E-12 | 1.67E-13 | 5.17E-14 | 9.68E-01 | 6.82E-01 | 9.05E-01 |
| 275.09704 | 155.44 | 16.94 | 15.06 | 15.32 | 15.59 | 1.91E-26 | 1.02E-14 | 4.22E-14 | 1.22E-13 | 3.81E-01 | 1.08E-02 | 3.86E-01 |
| 275.1087  | 23.53  | 24.22 | 24.52 | 24.66 | 24.06 | 1.08E-03 | 2.09E-01 | 2.45E-02 | 7.65E-01 | 8.29E-01 | 2.84E-02 | 1.82E-03 |
| 275.11421 | 155.06 | 14.95 | 14.02 | 14.81 | 14.26 | 5.27E-04 | 1.14E-03 | 9.40E-01 | 3.51E-02 | 9.95E-03 | 7.84E-01 | 1.48E-01 |
| 275.115   | 17.6   | 15.26 | 14.31 | 13.71 | 14.53 | 1.05E-02 | 1.70E-01 | 4.40E-03 | 4.16E-01 | 5.73E-01 | 9.69E-01 | 3.20E-01 |
| 275.15048 | 144.67 | 15.05 | 12.64 | 12.87 | 13.29 | 1.05E-16 | 4.92E-14 | 6.74E-13 | 1.58E-08 | 8.50E-01 | 1.28E-01 | 4.85E-01 |
| 275.16911 | 106.53 | 14.74 | 15.54 | 14.70 | 16.66 | 3.28E-05 | 2.46E-01 | 1.00E+00 | 1.06E-04 | 2.18E-01 | 6.31E-02 | 9.80E-05 |
| 275.20213 | 186.49 | 23.19 | 20.41 | 20.97 | 21.28 | 6.57E-55 | 5.11E-15 | 5.11E-15 | 5.11E-15 | 3.84E-04 | 2.38E-08 | 1.22E-01 |
| 275.92049 | 63.55  | 13.98 | 10.62 | 11.51 | 11.47 | 1.23E-05 | 9.27E-06 | 1.70E-03 | 2.24E-03 | 5.81E-01 | 6.39E-01 | 1.00E+00 |
| 275.9568  | 35.4   | 19.04 | 18.62 | 19.00 | 18.25 | 8.95E-03 | 3.37E-01 | 9.99E-01 | 1.24E-02 | 4.40E-01 | 4.98E-01 | 2.27E-02 |
| 275.9802  | 64.41  | 13.97 | 11.10 | 11.43 | 14.48 | 9.41E-32 | 4.15E-14 | 4.33E-14 | 2.84E-01 | 6.62E-01 | 1.53E-14 | 3.99E-14 |
| 275.98731 | 31.25  | 16.89 | 19.04 | 19.23 | 18.34 | 4.49E-55 | 5.11E-15 | 5.11E-15 | 7.77E-15 | 3.68E-01 | 3.64E-07 | 4.49E-11 |
| 275.99499 | 23.21  | 11.98 | 13.20 | 13.57 | 14.34 | 1.95E-06 | 2.06E-02 | 9.26E-04 | 6.58E-07 | 8.19E-01 | 5.10E-02 | 3.00E-01 |
| 276.00775 | 28.06  | 13.95 | 14.04 | 14.43 | 13.57 | 1.72E-02 | 9.87E-01 | 2.29E-01 | 4.57E-01 | 4.28E-01 | 3.00E-01 | 7.33E-03 |
| 276.01974 | 20.28  | 15.73 | 16.17 | 15.54 | 16.78 | 2.48E-06 | 2.22E-01 | 8.46E-01 | 6.99E-05 | 3.97E-02 | 5.67E-02 | 3.10E-06 |
| 276.04019 | 22.48  | 17.88 | 18.35 | 18.14 | 18.80 | 2.43E-11 | 6.04E-04 | 1.18E-01 | 5.15E-12 | 3.24E-01 | 1.87E-03 | 1.37E-06 |
| 276.07318 | 135.79 | 15.41 | 14.83 | 14.64 | 14.85 | 8.64E-09 | 1.89E-05 | 7.13E-09 | 7.80E-05 | 4.49E-01 | 9.97E-01 | 3.55E-01 |
| 276.086   | 25.84  | 15.95 | 15.24 | 15.68 | 15.71 | 1.16E-01 | 7.14E-02 | 7.76E-01 | 8.47E-01 | 4.56E-01 | 4.24E-01 | 1.00E+00 |
| 276.0927  | 17.68  | 16.41 | 18.20 | 18.31 | 18.49 | 1.10E-16 | 3.24E-11 | 1.10E-12 | 1.28E-13 | 9.64E-01 | 6.77E-01 | 9.10E-01 |
| 276.10092 | 294.14 | 18.40 | 16.86 | 16.95 | 16.84 | 1.20E-46 | 5.11E-15 | 5.11E-15 | 5.11E-15 | 7.61E-01 | 9.99E-01 | 6.81E-01 |
| 276.10933 | 207.83 | 20.09 | 19.69 | 19.71 | 19.65 | 1.03E-03 | 6.88E-03 | 9.25E-03 | 2.84E-03 | 9.99E-01 | 9.87E-01 | 9.69E-01 |
| 276.11199 | 23.26  | 18.29 | 19.12 | 19.26 | 18.51 | 2.94E-06 | 3.82E-04 | 1.69E-05 | 7.07E-01 | 9.05E-01 | 2.72E-02 | 3.14E-03 |
| 276.11884 | 189.29 | 16.18 | 15.79 | 15.58 | 15.94 | 1.94E-02 | 1.88E-01 | 1.05E-02 | 6.27E-01 | 7.05E-01 | 8.83E-01 | 2.80E-01 |
| 276.20545 | 176.34 | 20.68 | 17.78 | 18.43 | 18.70 | 1.78E-56 | 5.11E-15 | 5.11E-15 | 5.11E-15 | 2.54E-05 | 5.46E-09 | 2.50E-01 |
| 276.84639 | 95.89  | 15.31 | 14.58 | 14.75 | 15.27 | 4.99E-08 | 1.41E-06 | 3.57E-04 | 9.91E-01 | 5.87E-01 | 2.02E-05 | 2.42E-03 |
| 276.85427 | 76.79  | 18.98 | 19.51 | 19.54 | 19.24 | 1.36E-10 | 2.38E-08 | 2.08E-09 | 1.91E-02 | 9.82E-01 | 1.80E-02 | 5.27E-03 |
| 276.86596 | 29.25  | 12.10 | 14.03 | 15.12 | 13.89 | 3.51E-07 | 1.25E-03 | 6.94E-08 | 4.57E-03 | 1.65E-01 | 9.93E-01 | 1.03E-01 |
| 276.87499 | 133.88 | 18.14 | 16.13 | 16.23 | 16.82 | 1.37E-19 | 4.36E-14 | 4.24E-14 | 3.84E-08 | 9.67E-01 | 1.30E-02 | 4.37E-02 |
| 276.90894 | 148.67 | 16.89 | 14.77 | 14.76 | 15.89 | 2.24E-39 | 5.11E-15 | 5.11E-15 | 1.59E-09 | 1.00E+00 | 4.78E-11 | 2.26E-11 |
| 276.90916 | 27.9   | 16.77 | 17.51 | 17.81 | 16.76 | 7.65E-06 | 1.10E-02 | 9.20E-05 | 1.00E+00 | 6.07E-01 | 1.57E-02 | 2.00E-04 |
| 276.91472 | 81.94  | 16.72 | 14.46 | 15.91 | 15.97 | 2.32E-29 | 5.11E-15 | 9.11E-06 | 9.15E-05 | 4.98E-14 | 4.66E-14 | 9.86E-01 |
| 276.92091 | 73.41  | 15.21 | 13.42 | 14.75 | 14.64 | 1.85E-06 | 6.02E-07 | 4.78E-01 | 3.25E-01 | 4.92E-04 | 2.49E-03 | 9.90E-01 |
| 276.97147 | 37.34  | 15.61 | 16.45 | 16.59 | 16.38 | 1.61E-12 | 7.91E-09 | 1.25E-11 | 2.48E-07 | 7.34E-01 | 9.64E-01 | 4.51E-01 |
| 276.99235 | 46.61  | 19.05 | 18.32 | 18.53 | 18.60 | 2.93E-02 | 1.84E-02 | 1.48E-01 | 2.89E-01 | 8.42E-01 | 7.07E-01 | 9.93E-01 |
| 277.01243 | 21.26  | 15.46 | 14.25 | 14.04 | 14.49 | 4.52E-11 | 5.29E-08 | 1.26E-10 | 2.98E-05 | 7.52E-01 | 6.78E-01 | 1.56E-01 |
| 277.02273 | 19.58  | 16.13 | 15.81 | 15.20 | 15.68 | 1.33E-03 | 5.24E-01 | 4.36E-04 | 2.44E-01 | 5.09E-02 | 9.52E-01 | 1.96E-01 |
| 277.03389 | 22.53  | 19.45 | 21.33 | 20.86 | 20.82 | 1.15E-28 | 5.11E-15 | 4.36E-14 | 4.31E-14 | 1.20E-02 | 6.63E-03 | 9.91E-01 |
| 277.05987 | 22.99  | 18.64 | 18.09 | 18.29 | 18.39 | 8.31E-04 | 2.87E-04 | 4.39E-02 | 2.50E-01 | 4.41E-01 | 1.50E-01 | 9.06E-01 |
| 277.08582 | 22.19  | 16.56 | 15.48 | 15.74 | 15.54 | 2.66E-04 | 5.76E-04 | 1.41E-02 | 1.77E-03 | 7.86E-01 | 9.97E-01 | 8.91E-01 |
| 277.09612 | 289.92 | 17.04 | 13.48 | 12.89 | 13.60 | 5.15E-34 | 1.04E-14 | 5.11E-15 | 2.60E-14 | 2.31E-01 | 9.85E-01 | 1.23E-01 |



|           |        |       |       |       |       |          |          |          |          |          |          |          |
|-----------|--------|-------|-------|-------|-------|----------|----------|----------|----------|----------|----------|----------|
| 277.11273 | 189.42 | 16.38 | 15.13 | 15.47 | 15.72 | 4.09E-08 | 1.73E-08 | 4.69E-05 | 8.92E-03 | 3.66E-01 | 3.07E-02 | 6.23E-01 |
| 277.11296 | 24.31  | 17.83 | 18.10 | 18.10 | 17.53 | 2.61E-03 | 3.45E-01 | 3.24E-01 | 2.84E-01 | 1.00E+00 | 5.91E-03 | 4.98E-03 |
| 277.12303 | 173.22 | 15.58 | 15.43 | 15.86 | 15.33 | 8.65E-06 | 4.50E-01 | 3.35E-02 | 7.72E-02 | 3.23E-04 | 7.81E-01 | 8.26E-06 |
| 277.12349 | 26.65  | 18.20 | 16.08 | 16.29 | 16.52 | 5.04E-17 | 4.71E-14 | 7.31E-13 | 8.32E-10 | 8.27E-01 | 3.18E-01 | 8.08E-01 |
| 277.14492 | 285.73 | 21.38 | 20.83 | 21.01 | 20.64 | 2.30E-06 | 3.90E-04 | 3.16E-02 | 1.40E-06 | 5.63E-01 | 5.39E-01 | 4.60E-02 |
| 277.14517 | 20.89  | 19.62 | 20.15 | 19.15 | 19.26 | 5.39E-07 | 2.02E-02 | 4.09E-02 | 2.02E-01 | 8.21E-07 | 2.92E-05 | 9.35E-01 |
| 277.18147 | 159.44 | 15.86 | 14.65 | 15.04 | 15.02 | 7.38E-15 | 4.64E-14 | 5.07E-08 | 6.61E-08 | 3.26E-02 | 6.18E-02 | 9.99E-01 |
| 277.18167 | 37.8   | 16.39 | 15.27 | 16.12 | 16.50 | 1.31E-03 | 3.54E-03 | 8.28E-01 | 9.87E-01 | 5.29E-02 | 2.11E-03 | 6.66E-01 |
| 277.20963 | 193.22 | 17.05 | 14.13 | 14.32 | 15.99 | 1.08E-19 | 4.29E-14 | 4.85E-14 | 7.19E-03 | 9.34E-01 | 4.29E-07 | 5.62E-06 |
| 277.21788 | 222.89 | 27.72 | 26.97 | 27.17 | 27.55 | 7.20E-12 | 5.86E-11 | 1.21E-06 | 3.86E-01 | 2.57E-01 | 1.92E-06 | 2.91E-03 |
| 277.85297 | 240.05 | 16.47 | 13.36 | 14.77 | 15.31 | 1.85E-15 | 4.31E-14 | 5.00E-06 | 5.44E-03 | 3.23E-04 | 6.55E-07 | 4.23E-01 |
| 277.912   | 30.25  | 14.02 | 14.62 | 15.30 | 14.79 | 1.87E-05 | 8.61E-02 | 3.91E-06 | 1.62E-02 | 4.24E-02 | 9.11E-01 | 2.24E-01 |
| 277.98755 | 30.34  | 17.04 | 17.32 | 17.68 | 17.16 | 8.10E-05 | 1.93E-01 | 4.28E-05 | 8.41E-01 | 6.17E-02 | 6.99E-01 | 2.73E-03 |
| 278.03743 | 22.48  | 14.80 | 16.67 | 16.20 | 16.19 | 5.89E-18 | 4.37E-14 | 5.50E-11 | 3.24E-10 | 8.72E-02 | 9.25E-02 | 1.00E+00 |
| 278.04379 | 27.74  | 15.89 | 14.87 | 15.11 | 15.29 | 2.80E-10 | 1.91E-10 | 1.01E-06 | 4.78E-04 | 3.77E-01 | 3.46E-02 | 6.38E-01 |
| 278.05594 | 23.17  | 16.94 | 15.68 | 15.93 | 16.41 | 1.71E-07 | 2.20E-07 | 4.33E-05 | 9.65E-02 | 6.69E-01 | 9.88E-03 | 1.65E-01 |
| 278.08874 | 116.87 | 15.50 | 13.73 | 13.66 | 13.85 | 5.62E-26 | 4.02E-14 | 2.93E-14 | 4.29E-14 | 9.81E-01 | 9.03E-01 | 7.12E-01 |
| 278.09811 | 128.57 | 15.83 | 13.97 | 13.94 | 14.00 | 2.70E-14 | 6.63E-11 | 1.86E-11 | 3.49E-10 | 9.99E-01 | 1.00E+00 | 9.95E-01 |
| 278.11648 | 284.1  | 19.32 | 17.17 | 17.27 | 17.58 | 2.91E-60 | 5.11E-15 | 5.11E-15 | 5.11E-15 | 7.50E-01 | 1.31E-03 | 2.80E-02 |
| 278.14826 | 294.37 | 17.78 | 17.53 | 17.45 | 17.34 | 5.85E-04 | 9.44E-02 | 1.13E-02 | 3.46E-04 | 8.82E-01 | 2.89E-01 | 7.09E-01 |
| 278.2211  | 217.42 | 25.39 | 24.49 | 24.79 | 25.13 | 1.01E-14 | 5.66E-14 | 2.18E-07 | 7.77E-02 | 2.54E-02 | 1.68E-07 | 1.40E-02 |
| 278.84638 | 154.41 | 12.58 | 17.01 | 17.17 | 16.21 | 3.27E-28 | 2.00E-14 | 1.02E-14 | 4.35E-14 | 9.79E-01 | 2.24E-01 | 9.70E-02 |
| 278.85229 | 90.62  | 16.21 | 16.50 | 16.63 | 16.29 | 2.36E-06 | 2.77E-03 | 4.88E-06 | 7.94E-01 | 4.62E-01 | 6.97E-02 | 7.22E-04 |
| 278.85927 | 25.14  | 13.28 | 14.68 | 15.08 | 15.38 | 4.30E-07 | 1.62E-03 | 1.90E-05 | 1.08E-06 | 7.34E-01 | 3.02E-01 | 8.72E-01 |
| 278.90644 | 37.47  | 14.64 | 15.73 | 15.58 | 14.18 | 1.78E-05 | 7.86E-03 | 2.67E-02 | 5.52E-01 | 9.75E-01 | 1.27E-04 | 5.74E-04 |
| 278.92503 | 32.62  | 17.16 | 17.96 | 18.45 | 17.18 | 3.99E-14 | 3.77E-05 | 5.62E-12 | 1.00E+00 | 2.59E-02 | 1.46E-04 | 9.97E-11 |
| 278.92973 | 47.69  | 19.09 | 18.61 | 18.91 | 18.97 | 1.66E-01 | 1.19E-01 | 8.27E-01 | 9.48E-01 | 5.31E-01 | 3.90E-01 | 9.92E-01 |
| 278.95064 | 42.86  | 21.87 | 22.09 | 22.34 | 22.34 | 1.70E-05 | 1.62E-01 | 7.56E-05 | 1.45E-04 | 1.03E-01 | 1.22E-01 | 1.00E+00 |
| 278.9601  | 240.59 | 18.25 | 17.06 | 17.56 | 17.77 | 1.09E-17 | 4.20E-14 | 1.07E-07 | 6.14E-04 | 3.33E-04 | 3.41E-07 | 3.44E-01 |
| 279.02739 | 26.03  | 18.66 | 18.18 | 18.36 | 18.38 | 4.41E-02 | 2.42E-02 | 2.75E-01 | 3.63E-01 | 7.20E-01 | 6.77E-01 | 1.00E+00 |
| 279.03987 | 20.47  | 23.05 | 22.43 | 22.78 | 22.95 | 1.07E-03 | 6.81E-04 | 3.27E-01 | 9.31E-01 | 1.28E-01 | 1.07E-02 | 7.41E-01 |
| 279.04814 | 62.23  | 11.81 | 12.22 | 15.34 | 16.92 | 1.69E-14 | 9.18E-01 | 7.04E-07 | 3.62E-12 | 2.87E-05 | 4.66E-10 | 9.56E-02 |
| 279.08109 | 240.21 | 17.88 | 16.41 | 17.00 | 17.21 | 4.54E-14 | 4.66E-14 | 1.91E-06 | 8.65E-04 | 3.94E-03 | 5.89E-05 | 6.21E-01 |
| 279.1004  | 217.68 | 14.86 | 6.83  | 6.75  | 7.89  | 6.23E-35 | 5.11E-15 | 5.11E-15 | 2.60E-14 | 9.99E-01 | 3.59E-01 | 2.89E-01 |
| 279.11319 | 264.14 | 18.31 | 13.88 | 13.93 | 14.90 | 2.38E-45 | 5.11E-15 | 5.11E-15 | 6.22E-15 | 9.98E-01 | 2.77E-03 | 4.66E-03 |
| 279.16374 | 136.84 | 18.22 | 15.84 | 15.43 | 18.33 | 8.09E-11 | 1.04E-05 | 1.22E-07 | 9.96E-01 | 8.36E-01 | 1.25E-05 | 1.95E-07 |
| 279.16989 | 239.62 | 18.54 | 16.22 | 17.21 | 17.47 | 6.50E-13 | 9.25E-14 | 1.61E-05 | 1.33E-03 | 3.10E-03 | 1.68E-04 | 8.10E-01 |
| 279.19669 | 34.53  | 21.29 | 20.30 | 20.83 | 21.77 | 6.26E-08 | 1.57E-04 | 1.93E-01 | 1.76E-01 | 1.09E-01 | 3.68E-08 | 7.56E-04 |
| 279.22527 | 222.11 | 22.17 | 21.07 | 21.45 | 21.92 | 3.61E-12 | 7.43E-12 | 8.54E-06 | 3.35E-01 | 5.16E-02 | 5.98E-07 | 1.39E-02 |
| 279.2336  | 245.96 | 31.05 | 31.00 | 31.08 | 31.21 | 8.06E-03 | 8.30E-01 | 9.51E-01 | 4.17E-02 | 5.31E-01 | 4.54E-03 | 1.56E-01 |
| 279.38667 | 240.16 | 17.85 | 16.78 | 17.06 | 17.28 | 2.37E-13 | 1.72E-13 | 2.54E-08 | 1.63E-04 | 1.61E-01 | 2.20E-03 | 3.82E-01 |
| 279.40329 | 240.37 | 18.96 | 17.31 | 17.85 | 18.24 | 5.80E-17 | 4.33E-14 | 3.59E-09 | 4.07E-04 | 1.24E-02 | 3.95E-06 | 1.38E-01 |
| 279.41111 | 246.16 | 16.60 | 15.72 | 15.71 | 16.08 | 1.68E-08 | 3.40E-07 | 1.68E-07 | 6.83E-03 | 1.00E+00 | 1.41E-01 | 1.13E-01 |
| 279.42499 | 240.16 | 16.83 | 15.70 | 16.09 | 16.26 | 1.88E-09 | 3.55E-10 | 5.05E-05 | 4.63E-03 | 9.59E-02 | 7.63E-03 | 7.52E-01 |
| 279.50803 | 240.62 | 18.24 | 17.04 | 17.47 | 17.75 | 1.01E-17 | 4.31E-14 | 6.43E-09 | 6.26E-04 | 3.36E-03 | 5.74E-07 | 1.35E-01 |

|           |        |       |       |       |       |          |          |          |          |          |          |          |
|-----------|--------|-------|-------|-------|-------|----------|----------|----------|----------|----------|----------|----------|
| 279.51959 | 239.71 | 18.64 | 17.75 | 18.10 | 18.32 | 1.20E-15 | 4.26E-14 | 4.32E-07 | 9.22E-03 | 2.54E-03 | 3.99E-07 | 1.37E-01 |
| 279.9089  | 23.38  | 15.00 | 14.45 | 15.68 | 15.54 | 2.90E-05 | 1.63E-01 | 4.54E-02 | 1.89E-01 | 4.48E-05 | 6.77E-04 | 9.54E-01 |
| 279.95399 | 48.48  | 17.08 | 17.17 | 17.47 | 17.51 | 2.71E-04 | 8.83E-01 | 3.83E-03 | 1.93E-03 | 4.59E-02 | 2.51E-02 | 9.90E-01 |
| 280.0118  | 26.67  | 13.92 | 14.00 | 13.94 | 14.89 | 1.62E-02 | 9.95E-01 | 1.00E+00 | 2.37E-02 | 9.98E-01 | 5.35E-02 | 3.22E-02 |
| 280.03659 | 25.21  | 17.86 | 19.90 | 19.81 | 19.54 | 5.48E-42 | 5.11E-15 | 5.11E-15 | 5.77E-15 | 9.22E-01 | 5.33E-02 | 2.03E-01 |
| 280.04311 | 20.06  | 19.38 | 18.70 | 19.09 | 19.24 | 4.72E-04 | 2.28E-04 | 2.66E-01 | 8.37E-01 | 9.09E-02 | 9.50E-03 | 8.03E-01 |
| 280.09571 | 290.27 | 17.48 | 16.81 | 16.66 | 16.12 | 2.84E-09 | 3.08E-03 | 1.62E-04 | 4.25E-10 | 8.89E-01 | 5.31E-03 | 4.04E-02 |
| 280.10456 | 78.26  | 14.48 | 10.76 | 13.31 | 14.09 | 1.64E-17 | 4.14E-14 | 1.72E-02 | 7.78E-01 | 1.21E-08 | 7.41E-13 | 2.38E-01 |
| 280.11381 | 163.2  | 19.79 | 19.12 | 19.09 | 19.16 | 8.27E-10 | 1.28E-07 | 2.90E-08 | 1.55E-06 | 9.96E-01 | 9.87E-01 | 9.44E-01 |
| 280.13239 | 294.27 | 17.84 | 16.82 | 16.83 | 16.95 | 3.25E-13 | 7.75E-11 | 8.90E-11 | 3.42E-08 | 1.00E+00 | 8.17E-01 | 8.56E-01 |
| 280.2     | 34.41  | 18.55 | 17.03 | 17.94 | 18.80 | 3.46E-06 | 5.58E-05 | 2.61E-01 | 8.89E-01 | 4.09E-02 | 7.01E-06 | 7.25E-02 |
| 280.22744 | 222.11 | 16.68 | 15.03 | 15.12 | 15.73 | 1.82E-12 | 4.69E-11 | 3.32E-10 | 3.73E-04 | 9.80E-01 | 2.18E-02 | 5.73E-02 |
| 280.23574 | 247.55 | 28.82 | 28.53 | 28.69 | 28.93 | 3.38E-08 | 2.85E-05 | 1.36E-01 | 3.39E-01 | 6.41E-02 | 3.24E-08 | 1.56E-03 |
| 280.62555 | 240.16 | 16.96 | 15.16 | 16.17 | 15.99 | 4.37E-07 | 5.81E-08 | 4.46E-02 | 9.91E-03 | 6.37E-03 | 5.02E-02 | 9.32E-01 |
| 280.84304 | 108.43 | 16.27 | 15.78 | 15.82 | 16.00 | 5.10E-03 | 6.49E-03 | 1.53E-02 | 2.85E-01 | 9.91E-01 | 5.13E-01 | 6.88E-01 |
| 280.86184 | 149.73 | 10.45 | 17.86 | 17.60 | 17.48 | 9.04E-59 | 5.11E-15 | 5.11E-15 | 5.11E-15 | 9.02E-01 | 7.77E-01 | 9.91E-01 |
| 280.88807 | 68.99  | 18.59 | 18.40 | 19.03 | 18.89 | 7.10E-10 | 1.99E-01 | 2.78E-05 | 9.98E-03 | 3.24E-09 | 9.16E-06 | 5.29E-01 |
| 280.90899 | 46.13  | 24.04 | 24.76 | 25.30 | 25.09 | 1.63E-44 | 4.29E-14 | 5.11E-15 | 5.11E-15 | 2.17E-11 | 8.77E-05 | 3.59E-02 |
| 280.92172 | 26.79  | 15.25 | 16.27 | 16.63 | 15.38 | 2.02E-09 | 1.06E-04 | 4.42E-08 | 9.45E-01 | 4.13E-01 | 2.09E-03 | 3.38E-06 |
| 280.92757 | 55.16  | 15.02 | 14.41 | 15.14 | 15.28 | 3.02E-04 | 1.47E-02 | 9.27E-01 | 5.86E-01 | 2.52E-03 | 3.40E-04 | 9.13E-01 |
| 280.93144 | 191.99 | 12.97 | 12.30 | 13.13 | 13.34 | 1.76E-01 | 4.78E-01 | 9.87E-01 | 8.69E-01 | 3.08E-01 | 1.53E-01 | 9.72E-01 |
| 280.94879 | 48.33  | 17.30 | 17.57 | 17.94 | 17.93 | 8.25E-09 | 6.78E-02 | 1.42E-07 | 5.13E-07 | 8.40E-03 | 1.36E-02 | 1.00E+00 |
| 280.957   | 39.54  | 14.68 | 14.20 | 13.59 | 14.39 | 9.21E-03 | 4.45E-01 | 4.45E-03 | 8.15E-01 | 2.58E-01 | 9.45E-01 | 8.91E-02 |
| 280.96093 | 264.74 | 18.72 | 17.73 | 17.90 | 18.33 | 1.21E-09 | 3.71E-09 | 1.11E-06 | 5.99E-02 | 6.81E-01 | 1.62E-03 | 4.49E-02 |
| 280.97272 | 264.99 | 18.18 | 16.14 | 16.68 | 17.68 | 7.48E-14 | 7.15E-13 | 8.87E-08 | 2.33E-01 | 1.71E-01 | 2.66E-07 | 1.47E-03 |
| 280.98344 | 290.32 | 16.31 | 16.70 | 16.69 | 16.83 | 1.10E-02 | 7.26E-02 | 8.25E-02 | 9.70E-03 | 1.00E+00 | 8.72E-01 | 8.36E-01 |
| 280.98981 | 32.33  | 16.34 | 16.78 | 17.74 | 18.30 | 7.95E-31 | 1.41E-02 | 4.31E-14 | 5.11E-15 | 9.13E-09 | 4.26E-14 | 1.79E-03 |
| 281.032   | 23.16  | 11.33 | 16.33 | 16.78 | 14.52 | 1.58E-44 | 5.11E-15 | 5.11E-15 | 4.42E-14 | 5.13E-01 | 2.05E-06 | 1.37E-09 |
| 281.03708 | 23.38  | 21.31 | 20.74 | 21.05 | 21.23 | 8.75E-04 | 6.30E-04 | 2.65E-01 | 9.48E-01 | 1.59E-01 | 8.40E-03 | 6.33E-01 |
| 281.04545 | 20.09  | 15.02 | 12.98 | 15.36 | 15.70 | 7.92E-08 | 7.01E-05 | 8.80E-01 | 4.68E-01 | 4.12E-06 | 2.78E-07 | 8.88E-01 |
| 281.05289 | 27.27  | 20.38 | 20.57 | 20.67 | 20.56 | 3.18E-01 | 6.31E-01 | 2.47E-01 | 6.98E-01 | 9.19E-01 | 1.00E+00 | 8.97E-01 |
| 281.07371 | 43.27  | 13.66 | 15.75 | 16.30 | 15.29 | 3.33E-07 | 6.94E-05 | 2.30E-07 | 4.57E-03 | 6.66E-01 | 7.76E-01 | 1.66E-01 |
| 281.07671 | 270.2  | 17.05 | 16.24 | 16.82 | 16.88 | 1.71E-02 | 1.10E-02 | 8.07E-01 | 9.24E-01 | 1.30E-01 | 9.04E-02 | 9.95E-01 |
| 281.09172 | 62.76  | 9.85  | 16.61 | 6.33  | 6.95  | 1.29E-44 | 1.64E-14 | 4.83E-08 | 2.00E-05 | 5.11E-15 | 5.11E-15 | 7.48E-01 |
| 281.09474 | 264.79 | 17.77 | 16.31 | 17.38 | 17.42 | 7.49E-11 | 3.17E-11 | 2.00E-01 | 3.23E-01 | 2.32E-06 | 2.06E-06 | 9.97E-01 |
| 281.10822 | 63.33  | 18.09 | 17.53 | 18.23 | 18.88 | 5.80E-08 | 3.13E-02 | 8.97E-01 | 9.03E-04 | 4.59E-03 | 6.91E-09 | 1.14E-02 |
| 281.12973 | 174.88 | 9.64  | 13.19 | 12.55 | 14.02 | 3.96E-12 | 1.86E-08 | 3.99E-06 | 1.36E-11 | 6.99E-01 | 5.14E-01 | 7.11E-02 |
| 281.13986 | 152.72 | 15.17 | 13.92 | 14.20 | 14.19 | 3.96E-05 | 4.21E-05 | 2.27E-03 | 2.97E-03 | 7.38E-01 | 7.83E-01 | 1.00E+00 |
| 281.21266 | 191.14 | 16.22 | 14.42 | 14.92 | 16.31 | 5.04E-08 | 3.60E-06 | 1.40E-03 | 9.94E-01 | 4.89E-01 | 4.02E-06 | 1.16E-03 |
| 281.24012 | 246.25 | 25.45 | 24.87 | 25.17 | 25.43 | 2.04E-11 | 1.80E-10 | 3.71E-03 | 9.93E-01 | 3.01E-03 | 6.58E-09 | 1.60E-02 |
| 281.24915 | 264.68 | 31.36 | 31.42 | 31.34 | 31.51 | 7.82E-02 | 7.63E-01 | 9.97E-01 | 1.19E-01 | 6.58E-01 | 6.01E-01 | 8.48E-02 |
| 281.40381 | 264.5  | 17.59 | 16.41 | 16.83 | 17.10 | 5.21E-07 | 1.43E-07 | 1.14E-03 | 9.55E-02 | 1.89E-01 | 7.77E-03 | 5.64E-01 |
| 281.42159 | 270.32 | 16.99 | 15.72 | 16.40 | 16.75 | 1.47E-06 | 7.32E-07 | 5.49E-02 | 7.43E-01 | 2.24E-02 | 2.26E-04 | 4.85E-01 |
| 281.42859 | 264.79 | 16.79 | 14.36 | 15.16 | 16.22 | 9.49E-12 | 2.22E-11 | 8.20E-06 | 3.41E-01 | 8.19E-02 | 1.33E-06 | 1.31E-02 |
| 281.44251 | 264.69 | 16.81 | 14.84 | 15.35 | 16.11 | 1.93E-06 | 1.69E-06 | 5.91E-04 | 2.63E-01 | 5.31E-01 | 7.39E-03 | 2.09E-01 |

|           |        |       |       |       |       |          |          |          |          |          |          |          |
|-----------|--------|-------|-------|-------|-------|----------|----------|----------|----------|----------|----------|----------|
| 281.52589 | 270.03 | 17.09 | 15.99 | 16.33 | 16.80 | 1.32E-05 | 1.25E-05 | 4.58E-03 | 5.90E-01 | 4.49E-01 | 4.51E-03 | 2.01E-01 |
| 281.53801 | 264.51 | 18.72 | 17.70 | 17.81 | 18.41 | 9.18E-12 | 4.55E-10 | 2.12E-08 | 1.87E-01 | 8.84E-01 | 5.65E-05 | 8.68E-04 |
| 281.91235 | 53.41  | 19.29 | 19.96 | 20.52 | 20.34 | 1.45E-44 | 4.42E-14 | 5.11E-15 | 5.11E-15 | 3.20E-12 | 5.33E-06 | 8.22E-02 |
| 282.02866 | 26.65  | 18.12 | 16.26 | 16.72 | 17.20 | 1.43E-22 | 2.35E-14 | 6.57E-14 | 1.18E-06 | 3.57E-02 | 1.28E-06 | 3.24E-02 |
| 282.03819 | 28.19  | 18.63 | 18.51 | 18.64 | 18.60 | 5.68E-01 | 6.17E-01 | 1.00E+00 | 9.92E-01 | 5.73E-01 | 8.19E-01 | 9.82E-01 |
| 282.05093 | 22.74  | 18.16 | 19.74 | 19.57 | 19.17 | 1.56E-21 | 4.14E-14 | 4.45E-14 | 5.72E-09 | 6.94E-01 | 2.91E-03 | 6.51E-02 |
| 282.05566 | 25.11  | 16.18 | 16.37 | 16.55 | 16.44 | 3.98E-01 | 8.16E-01 | 3.34E-01 | 6.46E-01 | 8.66E-01 | 9.90E-01 | 9.70E-01 |
| 282.07024 | 48.73  | 16.21 | 18.82 | 18.46 | 17.18 | 4.14E-35 | 5.11E-15 | 6.22E-15 | 5.44E-06 | 2.46E-01 | 9.06E-14 | 1.79E-09 |
| 282.08521 | 20.17  | 21.50 | 21.72 | 22.19 | 21.75 | 1.22E-02 | 7.15E-01 | 5.63E-03 | 6.63E-01 | 1.28E-01 | 1.00E+00 | 1.80E-01 |
| 282.11126 | 290.56 | 18.00 | 16.62 | 16.73 | 16.89 | 3.90E-30 | 5.77E-15 | 1.51E-14 | 4.25E-14 | 7.32E-01 | 8.66E-02 | 5.12E-01 |
| 282.11183 | 80.82  | 15.40 | 13.82 | 14.42 | 15.28 | 5.60E-14 | 2.14E-12 | 1.55E-05 | 9.48E-01 | 2.10E-02 | 5.44E-10 | 4.33E-04 |
| 282.15627 | 76.41  | 13.75 | 12.46 | 15.65 | 15.49 | 5.46E-29 | 8.83E-06 | 2.21E-11 | 3.19E-09 | 7.55E-15 | 2.71E-14 | 9.35E-01 |
| 282.21581 | 45.2   | 16.11 | 13.70 | 14.00 | 15.42 | 1.95E-12 | 1.16E-10 | 1.13E-08 | 2.01E-01 | 8.31E-01 | 1.82E-05 | 4.96E-04 |
| 282.24244 | 245.45 | 20.80 | 20.08 | 20.35 | 20.62 | 5.06E-16 | 4.40E-14 | 3.29E-07 | 1.35E-01 | 5.38E-03 | 5.34E-09 | 8.48E-03 |
| 282.25173 | 264.48 | 29.35 | 28.94 | 29.00 | 29.30 | 1.24E-05 | 1.36E-04 | 1.57E-03 | 9.59E-01 | 9.15E-01 | 2.11E-03 | 1.54E-02 |
| 282.85433 | 45.07  | 10.84 | 10.26 | 13.53 | 10.10 | 5.48E-06 | 8.40E-01 | 8.16E-04 | 7.32E-01 | 4.73E-05 | 9.97E-01 | 3.01E-05 |
| 282.85951 | 86.57  | 16.73 | 15.46 | 16.18 | 16.17 | 5.11E-21 | 2.13E-14 | 1.23E-05 | 1.67E-05 | 1.09E-08 | 5.56E-08 | 1.00E+00 |
| 282.86732 | 68.36  | 19.34 | 19.96 | 20.27 | 19.96 | 1.03E-16 | 9.51E-09 | 4.20E-14 | 3.28E-08 | 1.48E-02 | 1.00E+00 | 1.50E-02 |
| 282.88654 | 80.23  | 16.05 | 15.08 | 16.03 | 15.94 | 1.03E-19 | 4.40E-14 | 9.97E-01 | 7.52E-01 | 4.33E-14 | 6.78E-13 | 8.63E-01 |
| 282.90713 | 46.23  | 20.96 | 21.76 | 22.29 | 22.10 | 1.80E-44 | 4.12E-14 | 5.11E-15 | 5.11E-15 | 1.17E-09 | 2.57E-04 | 9.88E-02 |
| 282.91149 | 139.19 | 13.91 | 13.67 | 13.88 | 14.08 | 6.58E-01 | 8.63E-01 | 1.00E+00 | 9.48E-01 | 9.12E-01 | 5.83E-01 | 9.20E-01 |
| 282.91289 | 51.68  | 17.05 | 17.65 | 18.28 | 18.06 | 3.26E-43 | 1.04E-13 | 5.11E-15 | 5.11E-15 | 6.13E-14 | 1.30E-06 | 2.08E-02 |
| 282.92201 | 132.53 | 15.75 | 15.34 | 15.04 | 16.12 | 3.35E-07 | 1.21E-01 | 7.41E-04 | 2.01E-01 | 3.76E-01 | 4.53E-04 | 3.29E-07 |
| 282.95811 | 20.87  | 17.41 | 19.35 | 19.25 | 18.79 | 4.89E-13 | 1.78E-11 | 1.20E-10 | 4.17E-06 | 9.81E-01 | 1.77E-01 | 3.33E-01 |
| 282.9732  | 296.97 | 14.56 | 13.26 | 14.35 | 14.45 | 2.54E-05 | 4.22E-05 | 8.72E-01 | 9.83E-01 | 1.20E-03 | 4.97E-04 | 9.84E-01 |
| 283.04524 | 20.36  | 14.43 | 16.94 | 15.96 | 15.91 | 5.98E-24 | 7.33E-15 | 1.67E-11 | 3.45E-10 | 4.41E-05 | 2.85E-05 | 9.94E-01 |
| 283.05403 | 22.63  | 22.26 | 23.75 | 23.60 | 23.20 | 2.48E-19 | 4.33E-14 | 4.95E-14 | 9.41E-08 | 7.62E-01 | 4.62E-03 | 6.89E-02 |
| 283.06929 | 28.42  | 17.79 | 15.82 | 13.94 | 16.17 | 9.63E-10 | 2.14E-03 | 8.09E-11 | 2.11E-02 | 4.49E-03 | 9.33E-01 | 6.97E-04 |
| 283.08273 | 145.04 | 17.07 | 15.67 | 14.69 | 15.17 | 6.08E-20 | 4.85E-08 | 4.15E-14 | 6.99E-13 | 3.31E-04 | 1.81E-01 | 2.07E-01 |
| 283.08864 | 20.63  | 17.94 | 17.82 | 18.45 | 18.06 | 2.45E-02 | 9.39E-01 | 7.23E-02 | 9.50E-01 | 1.91E-02 | 7.10E-01 | 2.82E-01 |
| 283.09562 | 216.24 | 15.32 | 7.96  | 8.05  | 8.81  | 1.60E-57 | 5.11E-15 | 5.11E-15 | 5.11E-15 | 9.96E-01 | 1.53E-01 | 2.28E-01 |
| 283.10433 | 25.33  | 16.08 | 17.08 | 15.00 | 14.86 | 2.82E-07 | 6.37E-02 | 3.72E-02 | 1.94E-02 | 5.13E-06 | 2.53E-06 | 9.89E-01 |
| 283.11065 | 187.96 | 14.62 | 16.00 | 17.62 | 16.28 | 1.77E-29 | 8.40E-09 | 5.11E-15 | 1.49E-11 | 2.56E-11 | 6.11E-01 | 7.44E-08 |
| 283.11919 | 153.05 | 15.27 | 13.32 | 14.54 | 14.26 | 9.48E-07 | 1.55E-07 | 1.33E-01 | 2.03E-02 | 2.67E-03 | 4.40E-02 | 8.54E-01 |
| 283.13187 | 212.69 | 15.40 | 9.45  | 9.31  | 9.75  | 8.12E-70 | 5.11E-15 | 5.11E-15 | 5.11E-15 | 9.56E-01 | 7.22E-01 | 4.06E-01 |
| 283.13753 | 38.55  | 15.77 | 17.09 | 15.97 | 17.31 | 2.21E-06 | 4.81E-04 | 9.32E-01 | 5.20E-05 | 5.26E-03 | 9.24E-01 | 7.41E-04 |
| 283.15541 | 158.85 | 16.00 | 15.21 | 15.43 | 15.40 | 6.76E-03 | 4.85E-03 | 7.34E-02 | 6.67E-02 | 7.84E-01 | 8.59E-01 | 9.99E-01 |
| 283.19191 | 264.64 | 17.89 | 17.38 | 17.32 | 17.40 | 4.93E-08 | 5.53E-06 | 3.42E-07 | 3.33E-05 | 9.57E-01 | 9.94E-01 | 8.73E-01 |
| 283.22837 | 292.59 | 17.82 | 17.47 | 17.37 | 17.52 | 8.56E-06 | 8.57E-04 | 5.05E-06 | 7.35E-03 | 6.66E-01 | 9.59E-01 | 3.72E-01 |
| 283.2438  | 226.78 | 23.95 | 22.90 | 23.62 | 23.91 | 1.84E-26 | 9.99E-15 | 1.10E-03 | 9.58E-01 | 9.28E-13 | 3.53E-14 | 1.18E-02 |
| 283.25563 | 268.99 | 25.84 | 25.16 | 25.31 | 25.66 | 3.07E-10 | 1.95E-09 | 3.06E-06 | 3.33E-01 | 4.81E-01 | 4.13E-05 | 7.34E-03 |
| 283.26459 | 285.47 | 27.23 | 27.32 | 27.81 | 27.52 | 2.78E-03 | 9.39E-01 | 2.09E-03 | 3.09E-01 | 1.87E-02 | 6.66E-01 | 3.14E-01 |
| 283.55667 | 297.07 | 14.16 | 13.29 | 14.28 | 14.29 | 3.52E-03 | 2.11E-02 | 9.80E-01 | 9.76E-01 | 7.94E-03 | 9.80E-03 | 1.00E+00 |
| 283.91049 | 53.56  | 15.84 | 16.27 | 16.92 | 16.76 | 4.96E-33 | 8.93E-07 | 5.11E-15 | 1.98E-14 | 4.62E-13 | 1.14E-07 | 2.22E-01 |
| 284.03099 | 25.3   | 14.89 | 14.52 | 14.31 | 15.15 | 2.31E-02 | 5.49E-01 | 1.51E-01 | 8.14E-01 | 8.73E-01 | 1.52E-01 | 2.32E-02 |

|           |        |       |       |       |       |          |          |          |          |          |          |          |
|-----------|--------|-------|-------|-------|-------|----------|----------|----------|----------|----------|----------|----------|
| 284.08914 | 25.32  | 14.06 | 14.34 | 14.52 | 13.61 | 5.33E-01 | 9.70E-01 | 8.76E-01 | 8.91E-01 | 9.92E-01 | 6.77E-01 | 4.93E-01 |
| 284.09949 | 28.3   | 15.51 | 15.42 | 15.22 | 15.33 | 7.84E-01 | 9.91E-01 | 7.46E-01 | 9.39E-01 | 9.02E-01 | 9.92E-01 | 9.80E-01 |
| 284.11445 | 189.78 | 14.80 | 13.43 | 14.33 | 12.95 | 3.20E-07 | 3.03E-04 | 4.76E-01 | 8.45E-07 | 4.29E-02 | 5.14E-01 | 5.53E-04 |
| 284.12655 | 290.02 | 16.91 | 16.51 | 16.15 | 16.30 | 7.55E-03 | 3.05E-01 | 5.30E-03 | 4.90E-02 | 4.14E-01 | 8.17E-01 | 9.25E-01 |
| 284.19507 | 187.17 | 17.14 | 16.16 | 16.29 | 16.40 | 1.07E-11 | 7.97E-11 | 1.27E-08 | 2.09E-06 | 7.87E-01 | 3.48E-01 | 8.71E-01 |
| 284.22382 | 75.15  | 15.15 | 11.11 | 12.38 | 13.44 | 4.80E-23 | 1.49E-14 | 7.32E-13 | 2.55E-05 | 2.63E-03 | 1.01E-08 | 2.26E-02 |
| 284.23204 | 167.12 | 16.39 | 15.23 | 15.16 | 15.85 | 2.42E-17 | 2.44E-13 | 4.70E-14 | 1.73E-03 | 9.56E-01 | 2.99E-04 | 3.18E-05 |
| 284.24701 | 231.58 | 21.60 | 20.52 | 21.30 | 21.57 | 2.57E-26 | 1.15E-14 | 5.74E-03 | 9.89E-01 | 1.62E-13 | 3.46E-14 | 2.57E-02 |
| 284.2576  | 265.76 | 21.15 | 20.28 | 20.47 | 20.84 | 1.04E-12 | 4.08E-12 | 3.24E-08 | 3.61E-02 | 3.88E-01 | 4.18E-05 | 1.19E-02 |
| 284.26752 | 282.27 | 24.98 | 24.91 | 25.57 | 25.22 | 9.63E-04 | 9.83E-01 | 3.53E-03 | 5.16E-01 | 1.39E-03 | 3.31E-01 | 2.17E-01 |
| 284.86542 | 82.07  | 16.70 | 17.27 | 17.75 | 17.34 | 1.97E-22 | 1.80E-08 | 1.29E-14 | 4.23E-10 | 2.82E-06 | 8.51E-01 | 1.83E-04 |
| 284.86998 | 32.1   | 14.71 | 13.94 | 14.73 | 13.89 | 1.28E-03 | 2.61E-02 | 1.00E+00 | 1.83E-02 | 2.49E-02 | 9.98E-01 | 1.74E-02 |
| 284.88506 | 61.88  | 16.46 | 16.15 | 17.09 | 17.16 | 3.88E-25 | 5.09E-03 | 3.41E-10 | 1.93E-11 | 4.53E-14 | 4.13E-14 | 8.93E-01 |
| 284.90346 | 51.73  | 15.82 | 14.95 | 15.89 | 15.80 | 6.87E-10 | 6.47E-08 | 9.75E-01 | 9.99E-01 | 1.40E-08 | 6.70E-07 | 9.48E-01 |
| 284.9065  | 40.66  | 16.40 | 16.40 | 17.19 | 17.00 | 2.23E-16 | 1.00E+00 | 1.62E-12 | 1.99E-07 | 5.74E-12 | 4.02E-07 | 2.96E-01 |
| 284.91722 | 118.78 | 15.75 | 15.50 | 15.45 | 16.52 | 3.07E-03 | 8.39E-01 | 7.41E-01 | 5.79E-02 | 9.98E-01 | 7.23E-03 | 3.79E-03 |
| 284.95855 | 167.64 | 14.10 | 13.78 | 12.20 | 13.88 | 4.15E-04 | 9.12E-01 | 4.97E-04 | 9.70E-01 | 7.56E-03 | 9.97E-01 | 5.18E-03 |
| 284.96969 | 17.77  | 13.08 | 13.88 | 13.78 | 14.64 | 1.46E-03 | 1.52E-01 | 2.42E-01 | 4.09E-04 | 9.95E-01 | 2.15E-01 | 1.27E-01 |
| 285.05849 | 22.55  | 15.94 | 17.16 | 17.01 | 16.75 | 1.38E-12 | 9.69E-12 | 1.40E-09 | 1.62E-05 | 8.09E-01 | 7.62E-02 | 3.98E-01 |
| 285.06557 | 182.36 | 19.21 | 18.67 | 18.86 | 18.86 | 1.12E-04 | 4.23E-05 | 1.45E-02 | 1.81E-02 | 4.01E-01 | 4.48E-01 | 1.00E+00 |
| 285.07381 | 17.25  | 14.81 | 15.90 | 16.36 | 16.95 | 2.95E-10 | 1.63E-03 | 1.99E-06 | 1.72E-10 | 4.39E-01 | 5.63E-03 | 2.34E-01 |
| 285.09844 | 150.21 | 15.13 | 14.20 | 14.08 | 14.26 | 1.02E-09 | 3.91E-07 | 8.12E-09 | 5.50E-06 | 9.11E-01 | 9.80E-01 | 7.26E-01 |
| 285.1136  | 23.07  | 20.04 | 19.86 | 20.25 | 20.21 | 2.26E-03 | 3.36E-01 | 2.07E-01 | 4.25E-01 | 2.66E-03 | 1.25E-02 | 9.84E-01 |
| 285.12701 | 27.62  | 13.76 | 14.26 | 14.67 | 13.44 | 3.33E-03 | 4.50E-01 | 3.40E-02 | 7.95E-01 | 6.27E-01 | 1.01E-01 | 3.24E-03 |
| 285.13477 | 186.19 | 16.38 | 16.06 | 16.40 | 15.86 | 9.39E-06 | 3.06E-02 | 9.99E-01 | 1.05E-04 | 2.33E-02 | 3.59E-01 | 7.98E-05 |
| 285.17113 | 183.42 | 16.51 | 16.02 | 16.19 | 16.01 | 6.85E-04 | 1.90E-03 | 7.54E-02 | 1.81E-03 | 6.18E-01 | 1.00E+00 | 5.70E-01 |
| 285.20729 | 293.81 | 17.47 | 17.43 | 17.30 | 17.61 | 4.00E-02 | 9.85E-01 | 3.26E-01 | 5.38E-01 | 5.60E-01 | 3.60E-01 | 1.98E-02 |
| 285.2225  | 238.73 | 18.84 | 18.03 | 18.46 | 18.53 | 1.69E-08 | 1.79E-09 | 9.67E-03 | 6.74E-02 | 4.38E-03 | 8.67E-04 | 9.41E-01 |
| 285.24394 | 179.24 | 18.03 | 17.04 | 17.20 | 17.57 | 2.31E-09 | 5.54E-09 | 9.45E-07 | 1.99E-02 | 7.42E-01 | 7.88E-03 | 1.10E-01 |
| 285.25031 | 231.96 | 17.97 | 16.60 | 17.53 | 17.86 | 2.30E-27 | 6.22E-15 | 5.90E-04 | 7.68E-01 | 2.03E-13 | 3.53E-14 | 2.84E-02 |
| 285.25874 | 245.32 | 19.06 | 17.99 | 18.42 | 18.31 | 1.08E-13 | 7.26E-14 | 5.63E-06 | 2.16E-07 | 4.94E-03 | 7.30E-02 | 8.43E-01 |
| 285.27076 | 290.12 | 21.34 | 21.35 | 22.02 | 21.58 | 1.46E-03 | 1.00E+00 | 2.20E-03 | 6.25E-01 | 3.85E-03 | 6.80E-01 | 1.18E-01 |
| 286.02399 | 38.6   | 14.66 | 16.09 | 16.40 | 15.45 | 1.14E-20 | 8.14E-14 | 4.15E-14 | 5.75E-05 | 2.93E-01 | 2.70E-03 | 1.72E-06 |
| 286.05126 | 17.26  | 13.99 | 15.74 | 15.18 | 14.95 | 3.92E-08 | 9.89E-09 | 1.35E-04 | 4.88E-03 | 2.03E-01 | 3.85E-02 | 8.59E-01 |
| 286.06137 | 16.78  | 17.49 | 18.65 | 18.06 | 18.13 | 3.58E-13 | 6.42E-14 | 2.45E-04 | 5.74E-05 | 1.83E-04 | 1.96E-03 | 9.63E-01 |
| 286.06475 | 174.24 | 15.35 | 12.87 | 13.88 | 14.04 | 2.41E-19 | 3.66E-14 | 8.50E-09 | 8.54E-07 | 1.96E-04 | 2.23E-05 | 9.14E-01 |
| 286.08197 | 23.7   | 13.74 | 15.14 | 15.59 | 14.88 | 1.19E-15 | 8.86E-10 | 4.27E-14 | 1.39E-06 | 1.51E-01 | 6.38E-01 | 7.08E-03 |
| 286.09384 | 197.34 | 16.92 | 15.68 | 15.38 | 15.88 | 1.62E-22 | 4.66E-14 | 2.82E-14 | 7.46E-11 | 1.54E-01 | 5.54E-01 | 4.70E-03 |
| 286.09401 | 66.3   | 15.49 | 13.36 | 14.86 | 15.52 | 6.88E-40 | 5.11E-15 | 4.71E-05 | 9.97E-01 | 3.66E-14 | 5.11E-15 | 5.46E-05 |
| 286.11692 | 23.14  | 16.19 | 15.52 | 16.32 | 16.30 | 5.72E-06 | 4.03E-04 | 8.65E-01 | 9.16E-01 | 2.40E-05 | 7.26E-05 | 1.00E+00 |
| 286.21096 | 147.79 | 15.48 | 14.97 | 14.90 | 14.98 | 5.65E-05 | 1.25E-03 | 1.22E-04 | 2.35E-03 | 9.49E-01 | 1.00E+00 | 9.30E-01 |
| 286.21564 | 258.49 | 19.42 | 17.83 | 17.93 | 17.48 | 1.98E-38 | 5.33E-15 | 7.33E-15 | 5.11E-15 | 8.71E-01 | 3.82E-02 | 3.64E-03 |
| 286.26214 | 246.18 | 16.29 | 14.75 | 15.08 | 14.86 | 7.09E-06 | 2.26E-05 | 1.26E-03 | 1.60E-04 | 7.49E-01 | 9.88E-01 | 9.16E-01 |
| 286.27414 | 297.11 | 15.38 | 16.48 | 17.26 | 16.80 | 2.02E-07 | 4.38E-03 | 8.49E-08 | 1.56E-04 | 8.28E-02 | 7.79E-01 | 5.19E-01 |
| 286.85422 | 53.75  | 18.25 | 16.15 | 17.87 | 17.98 | 1.47E-39 | 5.11E-15 | 2.36E-02 | 1.95E-01 | 5.33E-15 | 5.11E-15 | 8.72E-01 |

|           |        |       |       |       |       |          |          |          |          |          |          |          |
|-----------|--------|-------|-------|-------|-------|----------|----------|----------|----------|----------|----------|----------|
| 286.86473 | 37.64  | 18.40 | 18.14 | 20.07 | 18.90 | 1.30E-21 | 4.92E-01 | 4.15E-14 | 3.90E-02 | 3.99E-14 | 6.07E-04 | 1.65E-08 |
| 286.87496 | 47.45  | 20.89 | 19.70 | 19.75 | 19.62 | 2.60E-17 | 4.68E-13 | 2.22E-12 | 1.22E-13 | 9.88E-01 | 9.67E-01 | 8.60E-01 |
| 286.89102 | 162.27 | 15.56 | 11.24 | 10.45 | 13.89 | 7.84E-16 | 1.29E-10 | 7.34E-14 | 4.13E-02 | 5.87E-01 | 3.31E-04 | 1.18E-06 |
| 286.91688 | 150.86 | 16.93 | 16.42 | 15.93 | 16.35 | 6.27E-07 | 1.64E-02 | 8.76E-08 | 6.19E-03 | 2.94E-02 | 9.82E-01 | 9.26E-02 |
| 286.93616 | 28.59  | 20.69 | 23.24 | 22.95 | 22.95 | 4.12E-37 | 5.11E-15 | 5.33E-15 | 6.00E-15 | 3.87E-01 | 4.30E-01 | 1.00E+00 |
| 286.97235 | 20.8   | 16.35 | 16.61 | 16.61 | 16.47 | 2.48E-01 | 3.07E-01 | 2.99E-01 | 8.58E-01 | 1.00E+00 | 8.16E-01 | 8.13E-01 |
| 286.97895 | 26.04  | 21.67 | 19.33 | 19.69 | 19.82 | 3.90E-13 | 4.19E-12 | 2.70E-09 | 8.91E-08 | 6.65E-01 | 4.31E-01 | 9.76E-01 |
| 287.00932 | 25.67  | 19.60 | 21.29 | 21.54 | 20.73 | 4.40E-55 | 5.11E-15 | 5.11E-15 | 1.60E-14 | 5.36E-02 | 3.65E-07 | 2.05E-13 |
| 287.04474 | 34.96  | 16.24 | 12.69 | 12.77 | 14.39 | 5.11E-25 | 3.46E-14 | 3.71E-14 | 6.71E-07 | 9.94E-01 | 1.11E-05 | 2.84E-05 |
| 287.05323 | 16.75  | 18.67 | 19.63 | 19.45 | 19.11 | 1.12E-04 | 1.07E-04 | 2.28E-03 | 2.09E-01 | 8.51E-01 | 1.13E-01 | 4.49E-01 |
| 287.06257 | 172.23 | 14.91 | 11.76 | 12.35 | 13.25 | 2.44E-31 | 5.11E-15 | 2.46E-14 | 2.38E-10 | 6.61E-02 | 3.12E-08 | 1.46E-03 |
| 287.08941 | 23.44  | 16.33 | 14.22 | 13.31 | 14.62 | 9.25E-08 | 1.99E-04 | 2.47E-08 | 5.35E-03 | 2.76E-01 | 8.73E-01 | 5.94E-02 |
| 287.09962 | 69.89  | 13.56 | 16.81 | 11.38 | 12.50 | 4.77E-75 | 5.11E-15 | 1.07E-14 | 6.13E-07 | 5.11E-15 | 5.11E-15 | 2.30E-07 |
| 287.10922 | 25.06  | 15.79 | 15.01 | 15.66 | 15.68 | 6.37E-04 | 6.41E-04 | 9.15E-01 | 9.46E-01 | 7.89E-03 | 8.71E-03 | 1.00E+00 |
| 287.11421 | 152.1  | 15.46 | 15.70 | 15.97 | 15.50 | 6.73E-05 | 1.76E-01 | 7.95E-05 | 9.84E-01 | 9.61E-02 | 3.91E-01 | 8.48E-04 |
| 287.12696 | 210.18 | 16.01 | 9.36  | 9.83  | 10.61 | 3.14E-36 | 5.11E-15 | 5.11E-15 | 2.51E-14 | 7.56E-01 | 6.31E-02 | 4.08E-01 |
| 287.15056 | 164.78 | 16.23 | 15.96 | 16.35 | 15.76 | 2.85E-05 | 1.37E-01 | 7.56E-01 | 1.44E-03 | 1.24E-02 | 4.00E-01 | 4.50E-05 |
| 287.1881  | 114.49 | 14.88 | 13.86 | 12.99 | 13.56 | 2.47E-08 | 4.24E-03 | 5.99E-09 | 1.49E-04 | 2.41E-02 | 7.78E-01 | 2.63E-01 |
| 287.20201 | 174.78 | 17.28 | 14.01 | 15.53 | 15.18 | 2.22E-55 | 5.11E-15 | 7.99E-15 | 5.11E-15 | 4.20E-14 | 1.01E-11 | 1.07E-01 |
| 287.22344 | 216.54 | 16.72 | 17.11 | 16.58 | 16.63 | 2.47E-02 | 1.40E-01 | 8.67E-01 | 9.70E-01 | 2.39E-02 | 6.65E-02 | 9.91E-01 |
| 287.94005 | 23.39  | 16.22 | 18.46 | 18.47 | 17.86 | 1.31E-28 | 1.18E-14 | 9.55E-15 | 1.05E-13 | 1.00E+00 | 1.76E-02 | 1.39E-02 |
| 287.98245 | 25.74  | 16.64 | 13.86 | 13.79 | 14.39 | 1.63E-11 | 2.19E-09 | 5.76E-10 | 3.09E-06 | 9.98E-01 | 6.32E-01 | 5.21E-01 |
| 287.98757 | 28.19  | 15.59 | 17.07 | 16.58 | 16.76 | 9.65E-16 | 4.40E-14 | 4.79E-08 | 5.69E-10 | 2.47E-02 | 2.90E-01 | 7.54E-01 |
| 288.0129  | 22.19  | 13.22 | 15.44 | 15.90 | 15.03 | 5.21E-27 | 4.33E-14 | 6.22E-15 | 5.31E-13 | 1.74E-01 | 2.99E-01 | 1.21E-03 |
| 288.01985 | 27.51  | 14.58 | 15.13 | 14.94 | 15.13 | 9.07E-02 | 1.19E-01 | 4.52E-01 | 1.27E-01 | 8.77E-01 | 1.00E+00 | 8.74E-01 |
| 288.05673 | 19.75  | 15.19 | 15.71 | 15.13 | 14.84 | 1.86E-01 | 5.16E-01 | 9.99E-01 | 8.10E-01 | 4.46E-01 | 1.35E-01 | 8.82E-01 |
| 288.08469 | 20.69  | 17.91 | 18.45 | 18.22 | 18.33 | 6.06E-04 | 3.61E-04 | 9.92E-02 | 1.19E-02 | 2.96E-01 | 8.25E-01 | 8.31E-01 |
| 288.10926 | 259.56 | 18.87 | 17.14 | 17.00 | 17.47 | 3.54E-38 | 5.11E-15 | 5.11E-15 | 3.33E-14 | 7.02E-01 | 7.29E-02 | 3.01E-03 |
| 288.12117 | 18.74  | 18.39 | 19.40 | 19.09 | 19.75 | 3.53E-10 | 1.67E-06 | 1.64E-03 | 2.58E-10 | 3.71E-01 | 3.12E-01 | 5.76E-03 |
| 288.20555 | 183.1  | 14.58 | 11.07 | 12.14 | 11.98 | 2.10E-32 | 5.11E-15 | 4.24E-14 | 4.16E-14 | 2.09E-04 | 3.30E-03 | 9.32E-01 |
| 288.77852 | 289.87 | 17.27 | 18.50 | 18.13 | 19.00 | 1.87E-33 | 3.60E-14 | 7.20E-12 | 5.11E-15 | 1.10E-02 | 3.57E-04 | 7.07E-11 |
| 288.77957 | 21.7   | 10.11 | 8.53  | 7.23  | 11.62 | 2.11E-08 | 9.47E-02 | 1.67E-04 | 1.38E-01 | 2.45E-01 | 1.45E-04 | 1.97E-08 |
| 288.8517  | 55.76  | 16.98 | 15.12 | 16.17 | 16.34 | 1.34E-24 | 6.00E-15 | 1.03E-06 | 3.34E-04 | 5.27E-10 | 3.25E-12 | 6.97E-01 |
| 288.86357 | 74.35  | 15.39 | 14.77 | 15.48 | 14.83 | 3.03E-04 | 9.34E-03 | 9.68E-01 | 3.24E-02 | 2.61E-03 | 9.88E-01 | 1.05E-02 |
| 288.88813 | 29.52  | 14.44 | 15.40 | 15.71 | 15.46 | 4.41E-13 | 1.07E-07 | 1.25E-12 | 2.87E-08 | 2.43E-01 | 9.80E-01 | 4.78E-01 |
| 288.91165 | 79.69  | 14.71 | 14.16 | 14.49 | 14.46 | 8.18E-02 | 4.44E-02 | 6.98E-01 | 6.57E-01 | 4.23E-01 | 5.16E-01 | 1.00E+00 |
| 288.92396 | 27.88  | 14.45 | 13.48 | 13.78 | 14.26 | 1.93E-02 | 2.05E-02 | 1.74E-01 | 9.44E-01 | 8.22E-01 | 1.22E-01 | 5.07E-01 |
| 288.95359 | 39.2   | 20.98 | 22.83 | 22.56 | 22.56 | 9.45E-26 | 1.98E-14 | 4.40E-14 | 4.23E-14 | 3.85E-01 | 3.90E-01 | 1.00E+00 |
| 288.97536 | 25.81  | 17.69 | 14.37 | 14.92 | 15.22 | 2.78E-13 | 1.75E-12 | 2.20E-09 | 2.85E-07 | 5.98E-01 | 2.44E-01 | 9.09E-01 |
| 288.98819 | 17.95  | 15.31 | 18.59 | 18.85 | 18.32 | 5.04E-31 | 1.35E-14 | 5.33E-15 | 3.92E-14 | 7.95E-01 | 7.98E-01 | 2.68E-01 |
| 288.9977  | 18.79  | 15.22 | 19.28 | 19.23 | 18.94 | 2.07E-37 | 5.11E-15 | 5.11E-15 | 6.00E-15 | 9.99E-01 | 7.07E-01 | 7.84E-01 |
| 289.00807 | 21.71  | 14.73 | 16.89 | 17.52 | 16.58 | 3.39E-35 | 1.60E-14 | 5.11E-15 | 4.37E-14 | 5.89E-03 | 4.09E-01 | 1.76E-05 |
| 289.034   | 17.18  | 22.05 | 23.26 | 23.57 | 23.30 | 6.80E-18 | 2.43E-11 | 4.35E-14 | 1.84E-11 | 2.71E-01 | 9.96E-01 | 4.17E-01 |
| 289.06863 | 25.31  | 20.63 | 20.24 | 20.47 | 20.58 | 4.72E-02 | 3.95E-02 | 6.99E-01 | 9.91E-01 | 3.98E-01 | 1.12E-01 | 8.80E-01 |
| 289.08751 | 184    | 17.97 | 17.58 | 17.61 | 17.69 | 4.12E-14 | 1.08E-12 | 3.99E-11 | 1.12E-06 | 9.14E-01 | 1.23E-01 | 3.84E-01 |

|           |        |       |       |       |       |           |          |          |          |          |          |          |
|-----------|--------|-------|-------|-------|-------|-----------|----------|----------|----------|----------|----------|----------|
| 289.10532 | 16.94  | 13.76 | 9.12  | 9.29  | 10.30 | 8.51E-13  | 4.67E-11 | 1.43E-10 | 2.02E-06 | 9.94E-01 | 3.07E-01 | 4.34E-01 |
| 289.10631 | 207.31 | 14.37 | 7.76  | 8.01  | 8.41  | 6.06E-32  | 5.77E-15 | 7.33E-15 | 2.91E-14 | 9.68E-01 | 6.63E-01 | 8.95E-01 |
| 289.11318 | 186.16 | 15.12 | 10.20 | 9.60  | 10.91 | 2.22E-43  | 5.11E-15 | 5.11E-15 | 6.22E-15 | 3.05E-01 | 1.93E-01 | 1.48E-03 |
| 289.12441 | 25.14  | 18.74 | 19.38 | 18.35 | 18.31 | 3.34E-06  | 1.36E-02 | 2.50E-01 | 2.02E-01 | 1.79E-05 | 1.67E-05 | 9.98E-01 |
| 289.12993 | 153.03 | 15.43 | 14.89 | 15.51 | 14.97 | 5.56E-05  | 2.88E-03 | 9.55E-01 | 2.00E-02 | 5.92E-04 | 9.59E-01 | 5.14E-03 |
| 289.21762 | 215.78 | 19.52 | 18.48 | 19.18 | 19.12 | 5.82E-15  | 4.30E-14 | 1.64E-02 | 5.05E-03 | 6.13E-08 | 1.71E-06 | 9.66E-01 |
| 289.87868 | 91.64  | 16.42 | 15.60 | 15.91 | 15.68 | 1.29E-17  | 4.27E-14 | 1.61E-07 | 3.51E-13 | 5.78E-03 | 8.56E-01 | 7.37E-02 |
| 289.94667 | 30.96  | 15.61 | 16.13 | 16.06 | 15.46 | 6.47E-05  | 7.28E-03 | 2.58E-02 | 7.93E-01 | 9.73E-01 | 5.45E-04 | 2.31E-03 |
| 289.95707 | 39.35  | 16.37 | 17.76 | 17.48 | 17.50 | 9.99E-16  | 5.57E-14 | 2.80E-10 | 7.49E-10 | 3.46E-01 | 4.14E-01 | 1.00E+00 |
| 289.98798 | 32.07  | 15.52 | 15.77 | 16.53 | 14.69 | 6.40E-13  | 6.36E-01 | 1.50E-05 | 9.70E-04 | 2.85E-03 | 1.41E-05 | 9.86E-14 |
| 290.02042 | 17.46  | 15.44 | 13.23 | 14.54 | 14.41 | 2.83E-07  | 3.35E-08 | 6.34E-02 | 3.17E-02 | 2.89E-03 | 1.28E-02 | 9.86E-01 |
| 290.03759 | 21.24  | 18.13 | 19.26 | 19.58 | 19.44 | 1.31E-16  | 9.38E-10 | 4.86E-14 | 5.37E-12 | 2.49E-01 | 7.39E-01 | 8.60E-01 |
| 290.07207 | 27.68  | 17.03 | 16.20 | 16.34 | 16.64 | 7.53E-05  | 8.42E-05 | 1.36E-03 | 1.79E-01 | 8.88E-01 | 1.18E-01 | 4.13E-01 |
| 290.08978 | 176.02 | 17.02 | 16.29 | 16.31 | 16.53 | 8.53E-08  | 7.33E-07 | 1.13E-06 | 2.09E-03 | 9.99E-01 | 3.44E-01 | 4.10E-01 |
| 290.10044 | 18.59  | 15.01 | 15.33 | 15.36 | 15.78 | 2.13E-03  | 3.54E-01 | 2.48E-01 | 6.18E-04 | 9.97E-01 | 1.07E-01 | 1.54E-01 |
| 290.11962 | 27.59  | 18.58 | 18.11 | 18.49 | 18.09 | 5.80E-04  | 6.13E-03 | 9.34E-01 | 4.96E-03 | 4.17E-02 | 9.99E-01 | 3.35E-02 |
| 290.12626 | 206.57 | 15.41 | 10.26 | 10.99 | 12.18 | 8.54E-14  | 5.18E-13 | 3.03E-10 | 1.23E-05 | 6.83E-01 | 2.64E-02 | 2.93E-01 |
| 290.17288 | 76.97  | 7.53  | 8.63  | 13.80 | 12.70 | 2.33E-31  | 1.37E-01 | 5.77E-15 | 4.22E-14 | 4.53E-14 | 5.25E-12 | 1.63E-01 |
| 290.21317 | 186.17 | 16.04 | 15.80 | 15.53 | 15.56 | 1.30E-01  | 7.57E-01 | 1.46E-01 | 2.14E-01 | 6.87E-01 | 7.76E-01 | 9.99E-01 |
| 290.22098 | 212.89 | 16.87 | 15.44 | 16.23 | 16.24 | 5.32E-20  | 3.02E-14 | 1.05E-05 | 3.55E-05 | 7.50E-08 | 1.22E-07 | 1.00E+00 |
| 290.23847 | 239.81 | 16.64 | 14.76 | 15.94 | 16.19 | 5.65E-07  | 1.71E-07 | 1.34E-01 | 5.43E-01 | 2.83E-03 | 2.65E-04 | 8.76E-01 |
| 290.77594 | 291.59 | 14.23 | 16.34 | 15.90 | 16.56 | 2.95E-26  | 3.66E-14 | 6.57E-14 | 1.80E-14 | 1.52E-01 | 7.25E-01 | 1.11E-02 |
| 290.89102 | 50.25  | 21.65 | 20.99 | 21.65 | 20.61 | 2.89E-02  | 3.39E-01 | 1.00E+00 | 5.39E-02 | 3.60E-01 | 8.04E-01 | 6.19E-02 |
| 290.92333 | 29.32  | 11.45 | 9.16  | 9.54  | 10.51 | 3.60E-02  | 3.59E-02 | 1.06E-01 | 6.99E-01 | 9.70E-01 | 4.29E-01 | 6.93E-01 |
| 290.92486 | 155.31 | 15.38 | 11.43 | 10.14 | 13.77 | 6.57E-25  | 5.15E-14 | 1.47E-14 | 4.28E-03 | 3.31E-02 | 1.45E-05 | 6.63E-12 |
| 290.93028 | 66.81  | 15.86 | 15.54 | 14.90 | 15.45 | 1.60E-05  | 3.41E-01 | 3.58E-06 | 1.55E-01 | 5.17E-03 | 9.67E-01 | 2.79E-02 |
| 290.94928 | 42.73  | 16.77 | 18.40 | 18.50 | 18.63 | 3.67E-44  | 5.11E-15 | 5.11E-15 | 5.11E-15 | 8.49E-01 | 2.40E-01 | 6.88E-01 |
| 290.95782 | 39.27  | 14.03 | 16.10 | 15.43 | 15.88 | 5.14E-14  | 5.65E-13 | 8.08E-07 | 2.52E-10 | 5.98E-02 | 8.56E-01 | 3.51E-01 |
| 291.00786 | 44.98  | 16.81 | 14.98 | 15.30 | 15.78 | 2.13E-06  | 2.17E-06 | 1.14E-04 | 2.13E-02 | 8.04E-01 | 1.40E-01 | 5.70E-01 |
| 291.03836 | 18.68  | 15.64 | 16.56 | 17.02 | 16.54 | 2.94E-09  | 7.50E-05 | 7.59E-10 | 1.71E-04 | 1.32E-01 | 1.00E+00 | 1.24E-01 |
| 291.07821 | 17.05  | 14.99 | 16.09 | 15.72 | 15.42 | 1.11E-04  | 4.66E-05 | 1.29E-02 | 3.12E-01 | 4.35E-01 | 4.17E-02 | 6.21E-01 |
| 291.09681 | 50.64  | 13.41 | 16.19 | 11.34 | 12.11 | 1.83E-103 | 5.11E-15 | 5.11E-15 | 3.69E-14 | 5.11E-15 | 5.11E-15 | 2.15E-08 |
| 291.11174 | 293.9  | 18.29 | 16.82 | 16.95 | 16.60 | 5.66E-28  | 3.80E-14 | 4.10E-14 | 9.55E-15 | 8.00E-01 | 4.36E-01 | 7.91E-02 |
| 291.12363 | 169.21 | 15.11 | 14.08 | 14.19 | 13.96 | 2.61E-07  | 1.25E-05 | 1.10E-04 | 1.92E-06 | 9.52E-01 | 9.57E-01 | 7.33E-01 |
| 291.14547 | 142.42 | 15.36 | 14.37 | 14.31 | 14.50 | 4.78E-13  | 3.93E-10 | 2.02E-11 | 1.28E-07 | 9.74E-01 | 8.27E-01 | 5.77E-01 |
| 291.16052 | 288.85 | 20.11 | 18.17 | 18.43 | 18.40 | 5.83E-37  | 5.11E-15 | 5.77E-15 | 6.00E-15 | 2.12E-01 | 3.50E-01 | 9.96E-01 |
| 291.19747 | 180.78 | 16.06 | 14.76 | 14.45 | 15.55 | 2.77E-13  | 1.93E-08 | 2.62E-12 | 8.96E-02 | 4.77E-01 | 2.53E-03 | 7.14E-06 |
| 291.23381 | 238.08 | 19.97 | 19.27 | 19.44 | 19.63 | 2.49E-10  | 1.56E-10 | 1.63E-06 | 6.73E-03 | 3.08E-01 | 3.39E-03 | 2.69E-01 |
| 291.48986 | 233.11 | 15.32 | 13.60 | 14.82 | 15.49 | 1.17E-08  | 2.45E-07 | 3.47E-01 | 9.46E-01 | 5.82E-04 | 7.00E-08 | 1.51E-01 |
| 291.89438 | 82.25  | 16.59 | 14.83 | 15.82 | 15.63 | 6.31E-13  | 8.44E-14 | 1.47E-03 | 8.13E-05 | 4.20E-05 | 2.12E-03 | 8.33E-01 |
| 291.96134 | 51.86  | 16.29 | 17.74 | 17.97 | 17.02 | 3.06E-21  | 4.70E-14 | 4.31E-14 | 1.61E-04 | 5.54E-01 | 2.68E-04 | 7.07E-07 |
| 292.00335 | 34.9   | 16.12 | 15.19 | 15.95 | 15.38 | 5.35E-05  | 1.94E-04 | 8.75E-01 | 6.22E-03 | 4.12E-03 | 8.50E-01 | 5.95E-02 |
| 292.03684 | 22.06  | 20.59 | 20.81 | 21.26 | 21.07 | 3.99E-07  | 2.64E-01 | 3.18E-07 | 6.75E-04 | 1.64E-03 | 1.61E-01 | 4.45E-01 |
| 292.05947 | 27.13  | 19.61 | 19.43 | 19.50 | 19.40 | 7.20E-02  | 1.44E-01 | 5.69E-01 | 7.45E-02 | 8.34E-01 | 9.87E-01 | 6.53E-01 |
| 292.0733  | 20.75  | 21.95 | 22.70 | 22.63 | 22.49 | 2.94E-11  | 2.70E-10 | 9.07E-09 | 1.72E-05 | 9.09E-01 | 2.30E-01 | 5.86E-01 |

|           |        |       |       |       |       |           |          |          |          |          |          |          |
|-----------|--------|-------|-------|-------|-------|-----------|----------|----------|----------|----------|----------|----------|
| 292.0813  | 19.09  | 19.21 | 20.32 | 19.82 | 19.46 | 1.09E-06  | 5.97E-07 | 1.34E-02 | 6.40E-01 | 7.39E-02 | 3.72E-04 | 3.08E-01 |
| 292.10463 | 127.7  | 16.23 | 14.35 | 14.73 | 14.97 | 3.68E-21  | 3.64E-14 | 7.01E-14 | 3.88E-10 | 1.48E-01 | 6.09E-03 | 5.90E-01 |
| 292.13197 | 290.19 | 17.50 | 12.06 | 13.70 | 14.53 | 4.58E-23  | 1.42E-14 | 2.27E-13 | 2.33E-08 | 4.33E-03 | 8.17E-06 | 3.34E-01 |
| 292.16405 | 160.54 | 16.67 | 12.20 | 13.25 | 13.55 | 2.45E-32  | 5.11E-15 | 3.38E-14 | 4.36E-14 | 7.85E-03 | 4.89E-04 | 8.09E-01 |
| 292.82836 | 78.84  | 16.16 | 17.59 | 17.66 | 17.21 | 9.88E-23  | 4.29E-14 | 4.10E-14 | 1.68E-10 | 9.59E-01 | 6.79E-02 | 1.69E-02 |
| 292.88309 | 132.5  | 16.04 | 15.95 | 16.12 | 16.59 | 6.23E-02  | 9.78E-01 | 9.90E-01 | 1.18E-01 | 9.01E-01 | 5.52E-02 | 2.32E-01 |
| 292.89443 | 59.75  | 14.73 | 14.14 | 14.58 | 14.06 | 6.25E-02  | 1.64E-01 | 9.53E-01 | 1.07E-01 | 4.23E-01 | 9.95E-01 | 3.07E-01 |
| 292.89954 | 149.15 | 15.83 | 14.68 | 14.51 | 15.95 | 8.97E-15  | 1.42E-07 | 7.27E-10 | 9.39E-01 | 8.12E-01 | 3.62E-08 | 2.18E-10 |
| 292.91499 | 17.94  | 14.43 | 16.68 | 16.27 | 16.36 | 2.30E-23  | 3.42E-14 | 4.35E-14 | 4.42E-14 | 2.29E-01 | 4.58E-01 | 9.82E-01 |
| 292.92447 | 20.94  | 17.83 | 21.07 | 21.00 | 20.66 | 3.12E-27  | 2.29E-14 | 2.66E-14 | 4.11E-14 | 9.95E-01 | 5.34E-01 | 6.79E-01 |
| 292.94557 | 69.89  | 15.78 | 15.07 | 15.71 | 16.01 | 1.15E-09  | 1.55E-06 | 9.47E-01 | 3.12E-01 | 2.98E-05 | 9.18E-10 | 1.23E-01 |
| 292.96645 | 48.76  | 19.24 | 18.05 | 18.50 | 18.51 | 2.83E-04  | 9.18E-05 | 2.96E-02 | 4.26E-02 | 3.66E-01 | 3.75E-01 | 1.00E+00 |
| 292.98752 | 33.91  | 19.45 | 20.31 | 20.48 | 20.27 | 1.13E-22  | 4.37E-14 | 3.55E-14 | 1.35E-13 | 3.26E-01 | 9.83E-01 | 1.80E-01 |
| 293.01772 | 20.06  | 15.31 | 17.17 | 15.75 | 16.24 | 8.40E-06  | 3.57E-06 | 6.16E-01 | 6.35E-02 | 8.66E-04 | 7.13E-02 | 5.68E-01 |
| 293.03417 | 19.05  | 15.53 | 12.77 | 12.99 | 14.47 | 1.24E-09  | 2.11E-08 | 2.21E-07 | 1.03E-01 | 9.61E-01 | 2.17E-03 | 9.77E-03 |
| 293.04299 | 25.11  | 19.06 | 19.46 | 19.25 | 19.24 | 1.13E-02  | 4.16E-03 | 3.45E-01 | 4.35E-01 | 3.09E-01 | 2.89E-01 | 1.00E+00 |
| 293.05051 | 34.18  | 16.49 | 16.87 | 16.77 | 16.24 | 7.24E-02  | 4.09E-01 | 6.50E-01 | 7.66E-01 | 9.80E-01 | 7.74E-02 | 1.72E-01 |
| 293.06356 | 30.62  | 15.43 | 15.52 | 15.83 | 15.45 | 6.82E-02  | 9.45E-01 | 7.02E-02 | 9.99E-01 | 2.58E-01 | 9.80E-01 | 1.30E-01 |
| 293.07686 | 21.17  | 18.08 | 18.72 | 18.71 | 18.50 | 2.48E-08  | 3.10E-07 | 3.26E-07 | 2.45E-03 | 1.00E+00 | 2.43E-01 | 2.63E-01 |
| 293.11425 | 34.91  | 16.15 | 25.47 | 17.76 | 16.13 | 2.37E-105 | 5.11E-15 | 2.13E-09 | 1.00E+00 | 5.11E-15 | 5.11E-15 | 8.88E-09 |
| 293.12738 | 293.58 | 18.42 | 16.74 | 16.89 | 16.88 | 2.46E-31  | 5.77E-15 | 1.62E-14 | 2.40E-14 | 7.28E-01 | 7.94E-01 | 1.00E+00 |
| 293.14005 | 157.9  | 15.19 | 13.22 | 14.37 | 14.60 | 1.28E-17  | 4.13E-14 | 2.26E-04 | 2.05E-02 | 2.86E-07 | 2.01E-09 | 6.77E-01 |
| 293.14027 | 20.54  | 13.24 | 8.27  | 10.30 | 10.85 | 4.60E-21  | 2.33E-14 | 1.26E-09 | 2.47E-06 | 7.82E-05 | 6.55E-07 | 6.33E-01 |
| 293.17734 | 273.02 | 20.19 | 20.38 | 20.22 | 19.86 | 3.40E-02  | 6.58E-01 | 9.98E-01 | 2.27E-01 | 7.80E-01 | 1.83E-02 | 1.72E-01 |
| 293.2128  | 197.91 | 19.42 | 18.19 | 18.15 | 18.22 | 3.74E-19  | 6.08E-14 | 4.30E-14 | 2.38E-13 | 9.93E-01 | 9.98E-01 | 9.73E-01 |
| 293.24934 | 260.47 | 21.38 | 20.88 | 21.05 | 21.31 | 7.42E-07  | 2.10E-06 | 3.57E-03 | 9.07E-01 | 2.83E-01 | 1.36E-04 | 4.63E-02 |
| 293.96129 | 36.19  | 16.94 | 16.61 | 17.14 | 16.29 | 5.98E-03  | 5.27E-01 | 8.34E-01 | 4.72E-02 | 1.41E-01 | 5.95E-01 | 5.07E-03 |
| 293.97478 | 30.18  | 13.96 | 14.72 | 13.92 | 13.57 | 5.30E-05  | 6.04E-03 | 9.99E-01 | 3.55E-01 | 4.81E-03 | 2.32E-05 | 4.50E-01 |
| 294.00659 | 21     | 18.05 | 19.30 | 19.45 | 19.64 | 1.84E-19  | 6.22E-12 | 5.77E-14 | 4.33E-14 | 8.17E-01 | 2.20E-01 | 6.97E-01 |
| 294.02995 | 19.43  | 20.91 | 20.90 | 20.75 | 21.16 | 8.20E-02  | 1.00E+00 | 6.96E-01 | 3.71E-01 | 7.57E-01 | 3.57E-01 | 4.62E-02 |
| 294.07024 | 17.61  | 20.20 | 20.88 | 20.84 | 20.70 | 2.37E-10  | 3.09E-09 | 2.38E-08 | 3.41E-05 | 9.75E-01 | 3.55E-01 | 5.97E-01 |
| 294.07719 | 20.57  | 15.64 | 16.32 | 16.03 | 15.84 | 3.54E-03  | 1.70E-03 | 1.46E-01 | 6.97E-01 | 4.21E-01 | 7.56E-02 | 7.77E-01 |
| 294.09678 | 25.86  | 16.39 | 16.83 | 17.33 | 16.81 | 4.10E-04  | 1.70E-01 | 9.41E-05 | 2.23E-01 | 1.09E-01 | 1.00E+00 | 1.02E-01 |
| 294.11121 | 289.54 | 17.49 | 15.83 | 15.73 | 14.95 | 5.82E-10  | 3.84E-05 | 9.24E-06 | 3.17E-10 | 9.93E-01 | 9.28E-02 | 1.57E-01 |
| 294.11325 | 51.07  | 11.27 | 22.43 | 7.68  | 6.92  | 1.01E-93  | 5.11E-15 | 3.72E-13 | 4.42E-14 | 5.11E-15 | 5.11E-15 | 3.81E-01 |
| 294.12948 | 263.02 | 18.80 | 16.93 | 17.06 | 16.84 | 9.05E-44  | 5.11E-15 | 5.11E-15 | 5.11E-15 | 7.27E-01 | 9.17E-01 | 3.45E-01 |
| 294.1798  | 287.82 | 17.36 | 17.69 | 17.47 | 18.06 | 5.58E-07  | 3.82E-02 | 7.92E-01 | 4.12E-07 | 3.05E-01 | 2.25E-02 | 4.15E-05 |
| 294.21602 | 180.71 | 15.74 | 15.03 | 15.14 | 15.23 | 2.10E-07  | 4.19E-07 | 1.74E-05 | 6.75E-04 | 8.50E-01 | 4.54E-01 | 8.98E-01 |
| 294.25239 | 256    | 18.61 | 17.97 | 18.25 | 18.49 | 1.04E-06  | 8.05E-07 | 1.21E-02 | 7.42E-01 | 9.19E-02 | 2.44E-04 | 2.17E-01 |
| 294.81968 | 64.45  | 17.82 | 18.07 | 18.30 | 18.16 | 3.75E-07  | 1.41E-02 | 1.03E-07 | 5.54E-04 | 3.67E-02 | 7.59E-01 | 3.55E-01 |
| 294.826   | 91.09  | 14.62 | 15.03 | 15.00 | 14.68 | 1.07E-01  | 1.94E-01 | 2.36E-01 | 9.92E-01 | 9.99E-01 | 3.72E-01 | 4.31E-01 |
| 294.88038 | 42.06  | 14.15 | 15.39 | 15.17 | 14.03 | 5.63E-05  | 1.70E-03 | 1.31E-02 | 9.85E-01 | 9.24E-01 | 9.71E-04 | 7.31E-03 |
| 294.90412 | 160.7  | 16.53 | 14.89 | 14.35 | 15.43 | 2.05E-27  | 4.15E-14 | 5.33E-15 | 1.62E-08 | 1.38E-02 | 1.78E-02 | 6.10E-08 |
| 294.91047 | 28.51  | 14.24 | 13.98 | 14.68 | 14.13 | 3.24E-01  | 9.04E-01 | 6.55E-01 | 9.91E-01 | 2.81E-01 | 9.84E-01 | 5.12E-01 |
| 294.92464 | 44.73  | 21.53 | 21.22 | 21.97 | 21.94 | 1.95E-15  | 4.67E-03 | 1.16E-05 | 1.00E-04 | 3.31E-13 | 1.03E-11 | 9.89E-01 |

|           |        |       |       |       |       |           |          |          |          |          |          |          |
|-----------|--------|-------|-------|-------|-------|-----------|----------|----------|----------|----------|----------|----------|
| 294.94117 | 17.69  | 13.26 | 10.66 | 14.24 | 15.26 | 3.94E-19  | 6.08E-08 | 1.08E-01 | 7.55E-05 | 3.68E-13 | 4.49E-14 | 1.19E-01 |
| 294.94775 | 151.27 | 15.34 | 14.82 | 15.04 | 15.15 | 1.08E-02  | 4.92E-03 | 2.14E-01 | 6.36E-01 | 4.91E-01 | 1.77E-01 | 9.06E-01 |
| 294.96445 | 42.68  | 14.84 | 14.19 | 14.88 | 14.30 | 3.17E-01  | 4.74E-01 | 1.00E+00 | 6.45E-01 | 4.45E-01 | 9.96E-01 | 6.11E-01 |
| 294.98472 | 19.32  | 17.10 | 16.20 | 15.84 | 16.72 | 6.24E-08  | 2.12E-04 | 6.30E-08 | 3.02E-01 | 3.56E-01 | 1.02E-01 | 6.79E-04 |
| 295.02204 | 83.21  | 13.43 | 14.49 | 15.70 | 15.73 | 3.74E-12  | 8.84E-03 | 2.98E-10 | 7.04E-10 | 2.29E-03 | 2.54E-03 | 1.00E+00 |
| 295.03313 | 19.41  | 21.60 | 21.99 | 21.45 | 21.28 | 2.66E-02  | 3.35E-01 | 9.08E-01 | 5.07E-01 | 1.01E-01 | 1.85E-02 | 8.86E-01 |
| 295.07372 | 21.68  | 16.18 | 16.48 | 16.51 | 16.34 | 9.62E-02  | 1.68E-01 | 1.05E-01 | 7.20E-01 | 9.97E-01 | 7.86E-01 | 6.70E-01 |
| 295.10888 | 168.76 | 14.66 | 13.29 | 13.12 | 14.93 | 1.27E-07  | 8.02E-04 | 1.01E-04 | 8.79E-01 | 9.66E-01 | 9.98E-05 | 1.14E-05 |
| 295.11738 | 62.32  | 9.02  | 17.87 | 8.46  | 8.24  | 6.62E-68  | 5.11E-15 | 5.15E-01 | 2.50E-01 | 5.11E-15 | 5.11E-15 | 9.55E-01 |
| 295.13202 | 211.93 | 15.33 | 9.33  | 10.05 | 9.73  | 9.46E-26  | 2.89E-14 | 4.29E-14 | 4.11E-14 | 5.64E-01 | 8.95E-01 | 9.44E-01 |
| 295.15553 | 172.79 | 15.93 | 15.43 | 16.06 | 15.85 | 4.30E-05  | 1.13E-03 | 7.24E-01 | 9.42E-01 | 2.46E-05 | 1.41E-02 | 4.14E-01 |
| 295.17532 | 167.66 | 15.86 | 15.12 | 14.83 | 15.68 | 1.42E-05  | 5.93E-03 | 2.92E-05 | 8.50E-01 | 5.63E-01 | 8.96E-02 | 1.91E-03 |
| 295.18948 | 201.59 | 18.77 | 17.42 | 17.62 | 18.40 | 1.40E-15  | 1.92E-13 | 2.09E-10 | 1.28E-01 | 6.08E-01 | 3.62E-07 | 7.80E-05 |
| 295.20115 | 66.73  | 13.25 | 11.35 | 14.20 | 14.88 | 7.47E-34  | 2.81E-13 | 3.37E-04 | 5.32E-10 | 7.99E-15 | 5.11E-15 | 2.80E-02 |
| 295.22814 | 262.02 | 21.16 | 19.64 | 19.79 | 20.09 | 4.02E-19  | 4.20E-14 | 5.14E-14 | 3.07E-09 | 7.88E-01 | 4.22E-02 | 2.92E-01 |
| 295.26451 | 286.48 | 24.16 | 23.44 | 23.71 | 24.12 | 2.99E-09  | 3.78E-08 | 9.52E-04 | 9.89E-01 | 1.25E-01 | 9.10E-07 | 5.78E-03 |
| 295.92788 | 53.02  | 16.65 | 15.73 | 16.72 | 16.71 | 2.23E-15  | 1.08E-11 | 9.55E-01 | 9.66E-01 | 1.29E-12 | 7.15E-12 | 1.00E+00 |
| 296.00929 | 20.21  | 16.08 | 18.67 | 17.64 | 18.08 | 5.86E-12  | 4.29E-12 | 3.50E-05 | 1.74E-07 | 1.73E-02 | 3.61E-01 | 5.97E-01 |
| 296.02289 | 20.98  | 17.05 | 18.15 | 18.13 | 17.88 | 7.65E-13  | 6.34E-11 | 8.43E-11 | 2.11E-06 | 9.99E-01 | 3.27E-01 | 3.79E-01 |
| 296.03695 | 19.86  | 17.85 | 17.74 | 17.28 | 17.35 | 2.83E-03  | 9.17E-01 | 7.17E-03 | 3.12E-02 | 5.87E-02 | 1.64E-01 | 9.83E-01 |
| 296.05242 | 25.17  | 15.74 | 18.34 | 18.58 | 17.13 | 5.87E-57  | 5.11E-15 | 5.11E-15 | 4.26E-14 | 3.30E-01 | 1.77E-13 | 4.24E-14 |
| 296.10921 | 142.34 | 15.97 | 13.33 | 13.93 | 14.30 | 1.16E-21  | 3.44E-14 | 7.25E-14 | 1.14E-09 | 7.80E-02 | 1.33E-03 | 4.88E-01 |
| 296.12683 | 289.92 | 17.15 | 14.39 | 15.60 | 15.78 | 2.05E-10  | 1.73E-11 | 2.24E-04 | 2.35E-03 | 9.33E-03 | 2.84E-03 | 9.67E-01 |
| 296.13481 | 24.58  | 15.32 | 13.31 | 14.32 | 13.48 | 1.30E-04  | 2.20E-04 | 1.55E-01 | 1.29E-03 | 1.63E-01 | 9.86E-01 | 3.35E-01 |
| 296.19294 | 202.57 | 15.72 | 13.78 | 13.91 | 15.10 | 5.93E-12  | 5.86E-10 | 5.84E-09 | 1.52E-01 | 9.68E-01 | 1.04E-04 | 5.44E-04 |
| 296.22368 | 148.66 | 14.94 | 14.28 | 13.96 | 14.45 | 3.15E-10  | 2.06E-05 | 5.77E-11 | 3.64E-03 | 9.65E-02 | 6.58E-01 | 4.07E-03 |
| 296.23159 | 202.65 | 18.42 | 18.16 | 18.04 | 17.93 | 4.79E-05  | 5.45E-02 | 1.47E-03 | 3.75E-05 | 6.89E-01 | 1.64E-01 | 7.37E-01 |
| 296.2678  | 286.4  | 21.74 | 21.01 | 21.29 | 21.71 | 6.62E-09  | 8.76E-08 | 1.88E-03 | 9.98E-01 | 1.19E-01 | 1.04E-06 | 6.84E-03 |
| 296.81775 | 92.06  | 16.30 | 16.42 | 16.68 | 16.63 | 7.02E-05  | 5.38E-01 | 1.78E-04 | 1.96E-03 | 2.67E-02 | 1.10E-01 | 9.66E-01 |
| 296.86493 | 91.22  | 14.02 | 13.20 | 13.82 | 15.06 | 9.82E-07  | 4.13E-02 | 9.06E-01 | 6.03E-03 | 2.09E-01 | 1.87E-07 | 7.82E-04 |
| 296.88296 | 51.23  | 22.99 | 23.11 | 23.91 | 23.78 | 9.36E-26  | 5.14E-01 | 3.91E-14 | 4.71E-14 | 4.40E-14 | 6.60E-11 | 4.47E-01 |
| 296.89341 | 33.04  | 15.75 | 16.37 | 17.02 | 15.53 | 2.04E-07  | 8.45E-02 | 9.68E-06 | 8.47E-01 | 7.01E-02 | 1.37E-02 | 7.36E-07 |
| 296.90247 | 70.58  | 15.69 | 15.07 | 16.56 | 16.42 | 8.94E-26  | 1.63E-05 | 4.00E-10 | 5.55E-07 | 1.73E-14 | 4.11E-14 | 7.01E-01 |
| 296.9199  | 164.18 | 18.28 | 13.17 | 12.20 | 13.46 | 3.22E-36  | 6.22E-15 | 5.11E-15 | 2.22E-14 | 1.09E-01 | 9.16E-01 | 2.36E-02 |
| 296.93767 | 34.54  | 13.93 | 13.36 | 13.73 | 15.09 | 2.24E-03  | 5.66E-01 | 9.69E-01 | 4.99E-02 | 8.40E-01 | 1.29E-03 | 1.73E-02 |
| 296.96371 | 59.11  | 17.05 | 16.45 | 16.98 | 17.84 | 1.05E-07  | 2.69E-02 | 9.87E-01 | 1.73E-03 | 7.35E-02 | 1.33E-08 | 6.86E-04 |
| 297.00007 | 20.77  | 15.98 | 16.05 | 16.02 | 16.44 | 6.90E-02  | 9.82E-01 | 9.97E-01 | 7.02E-02 | 9.98E-01 | 1.80E-01 | 1.24E-01 |
| 297.01235 | 30.85  | 15.90 | 16.22 | 16.32 | 16.60 | 2.11E-01  | 7.59E-01 | 5.54E-01 | 1.49E-01 | 9.89E-01 | 6.70E-01 | 8.37E-01 |
| 297.02915 | 19.8   | 16.56 | 16.45 | 15.71 | 15.89 | 1.87E-04  | 9.53E-01 | 6.37E-04 | 1.64E-02 | 5.99E-03 | 7.82E-02 | 8.55E-01 |
| 297.04752 | 200.39 | 15.60 | 15.16 | 15.48 | 15.48 | 4.79E-04  | 1.92E-04 | 6.07E-01 | 6.34E-01 | 1.79E-02 | 2.37E-02 | 1.00E+00 |
| 297.04759 | 53.77  | 15.60 | 16.13 | 17.24 | 17.03 | 7.12E-10  | 1.81E-01 | 6.80E-09 | 1.28E-06 | 2.35E-04 | 6.41E-03 | 8.67E-01 |
| 297.06269 | 20.61  | 14.56 | 18.55 | 12.11 | 12.86 | 1.89E-101 | 5.11E-15 | 5.11E-15 | 4.46E-14 | 5.11E-15 | 5.11E-15 | 1.39E-04 |
| 297.07134 | 22.45  | 14.89 | 14.64 | 15.04 | 16.19 | 1.88E-03  | 9.27E-01 | 9.78E-01 | 8.61E-03 | 7.53E-01 | 1.59E-03 | 3.21E-02 |
| 297.08427 | 151.43 | 9.37  | 14.03 | 13.11 | 10.82 | 8.79E-21  | 4.29E-14 | 2.39E-13 | 1.36E-02 | 2.13E-01 | 2.53E-09 | 2.69E-05 |
| 297.10408 | 32.78  | 16.57 | 14.63 | 14.61 | 15.19 | 4.39E-11  | 2.42E-09 | 1.29E-09 | 5.70E-05 | 1.00E+00 | 2.75E-01 | 2.46E-01 |



|           |        |       |       |       |       |           |          |          |          |          |          |          |
|-----------|--------|-------|-------|-------|-------|-----------|----------|----------|----------|----------|----------|----------|
| 297.11141 | 212.22 | 15.10 | 8.48  | 8.47  | 8.24  | 4.50E-41  | 5.11E-15 | 5.11E-15 | 5.11E-15 | 1.00E+00 | 9.61E-01 | 9.64E-01 |
| 297.13478 | 157.81 | 15.32 | 14.52 | 14.94 | 14.44 | 1.02E-05  | 1.56E-04 | 1.76E-01 | 3.85E-05 | 1.20E-01 | 9.74E-01 | 4.86E-02 |
| 297.13646 | 24.46  | 13.07 | 14.47 | 14.84 | 12.03 | 5.20E-08  | 1.81E-02 | 1.17E-03 | 1.45E-01 | 8.68E-01 | 1.21E-05 | 2.66E-07 |
| 297.15324 | 150.35 | 15.68 | 15.52 | 15.60 | 14.89 | 3.40E-02  | 9.41E-01 | 9.90E-01 | 3.09E-02 | 9.93E-01 | 1.40E-01 | 7.44E-02 |
| 297.15325 | 288.59 | 17.18 | 18.18 | 18.75 | 17.67 | 7.05E-29  | 9.79E-14 | 5.11E-15 | 4.75E-04 | 3.14E-05 | 5.13E-04 | 5.37E-14 |
| 297.17121 | 169.96 | 16.40 | 15.25 | 15.82 | 15.50 | 2.42E-06  | 1.48E-06 | 3.78E-02 | 4.26E-04 | 4.82E-02 | 6.79E-01 | 4.93E-01 |
| 297.20766 | 187.83 | 17.66 | 16.74 | 17.02 | 17.12 | 3.42E-16  | 4.31E-14 | 2.60E-09 | 2.01E-06 | 3.22E-02 | 1.64E-03 | 7.33E-01 |
| 297.22324 | 226.89 | 16.64 | 15.14 | 16.38 | 16.58 | 7.09E-22  | 4.16E-14 | 2.59E-01 | 9.73E-01 | 1.13E-13 | 4.15E-14 | 5.55E-01 |
| 297.23541 | 71.13  | 16.18 | 14.35 | 15.61 | 16.79 | 1.86E-08  | 8.84E-06 | 4.05E-01 | 3.72E-01 | 5.45E-03 | 1.18E-08 | 1.32E-02 |
| 297.24391 | 227.42 | 22.69 | 22.16 | 22.25 | 22.69 | 4.70E-02  | 1.08E-01 | 2.28E-01 | 1.00E+00 | 9.82E-01 | 1.50E-01 | 2.90E-01 |
| 297.27131 | 284    | 17.62 | 16.63 | 16.92 | 17.46 | 5.06E-08  | 2.35E-07 | 4.05E-04 | 8.15E-01 | 3.55E-01 | 5.43E-05 | 1.71E-02 |
| 297.28015 | 291.89 | 18.02 | 18.11 | 18.51 | 18.50 | 5.57E-06  | 8.61E-01 | 1.27E-04 | 3.10E-04 | 3.83E-03 | 6.94E-03 | 1.00E+00 |
| 297.28017 | 195.3  | 17.41 | 17.03 | 17.01 | 17.06 | 6.46E-04  | 3.29E-03 | 1.87E-03 | 1.08E-02 | 9.99E-01 | 9.94E-01 | 9.80E-01 |
| 297.88528 | 37.72  | 18.73 | 18.47 | 19.45 | 19.23 | 4.71E-26  | 1.24E-02 | 4.69E-14 | 1.06E-07 | 1.53E-14 | 5.11E-14 | 5.85E-02 |
| 297.96919 | 32.67  | 17.95 | 20.07 | 20.26 | 19.48 | 8.26E-50  | 5.11E-15 | 5.11E-15 | 1.02E-14 | 4.57E-01 | 8.50E-05 | 7.78E-08 |
| 298.02467 | 23.44  | 18.87 | 19.37 | 19.50 | 19.44 | 9.10E-13  | 9.63E-08 | 1.45E-11 | 3.48E-09 | 4.63E-01 | 8.79E-01 | 9.07E-01 |
| 298.04474 | 55.01  | 16.44 | 18.10 | 18.80 | 18.06 | 2.95E-25  | 7.24E-14 | 6.88E-15 | 3.56E-13 | 3.18E-03 | 9.98E-01 | 2.40E-03 |
| 298.0697  | 19.28  | 16.91 | 16.60 | 16.35 | 17.33 | 1.28E-04  | 4.70E-01 | 3.74E-02 | 2.07E-01 | 6.27E-01 | 6.58E-03 | 7.10E-05 |
| 298.11483 | 28.39  | 16.31 | 16.22 | 16.16 | 16.30 | 8.46E-01  | 9.57E-01 | 8.59E-01 | 1.00E+00 | 9.93E-01 | 9.71E-01 | 8.95E-01 |
| 298.1574  | 63.54  | 15.52 | 16.34 | 15.19 | 16.85 | 1.66E-04  | 1.48E-01 | 8.19E-01 | 4.96E-03 | 1.94E-02 | 5.91E-01 | 3.02E-04 |
| 298.24711 | 281.03 | 20.87 | 19.66 | 19.74 | 20.04 | 7.41E-14  | 2.31E-12 | 3.74E-11 | 3.49E-06 | 9.55E-01 | 9.62E-02 | 2.59E-01 |
| 298.2838  | 292.78 | 15.62 | 14.60 | 15.20 | 15.33 | 1.48E-01  | 9.99E-02 | 7.79E-01 | 9.23E-01 | 5.39E-01 | 3.95E-01 | 9.92E-01 |
| 298.80776 | 105.2  | 16.60 | 15.55 | 16.06 | 17.25 | 5.08E-25  | 1.70E-12 | 3.91E-04 | 3.59E-05 | 1.65E-03 | 8.66E-15 | 7.84E-14 |
| 298.8336  | 75.92  | 16.68 | 16.52 | 16.97 | 16.89 | 2.37E-08  | 1.40E-01 | 5.80E-04 | 3.28E-02 | 6.11E-08 | 2.57E-05 | 7.16E-01 |
| 298.84429 | 90.49  | 12.34 | 14.14 | 13.63 | 14.11 | 2.56E-06  | 1.23E-05 | 2.99E-03 | 2.97E-05 | 5.21E-01 | 1.00E+00 | 5.87E-01 |
| 298.86211 | 96.88  | 14.47 | 13.99 | 14.36 | 14.22 | 4.37E-02  | 2.93E-02 | 8.98E-01 | 4.60E-01 | 1.71E-01 | 6.17E-01 | 8.65E-01 |
| 298.88041 | 50.11  | 20.66 | 20.80 | 21.67 | 21.50 | 1.32E-30  | 3.36E-01 | 7.33E-15 | 4.31E-14 | 4.26E-14 | 1.45E-12 | 2.19E-01 |
| 298.88714 | 40.89  | 16.34 | 15.49 | 16.63 | 16.46 | 6.35E-21  | 1.21E-12 | 2.87E-02 | 6.96E-01 | 3.95E-14 | 6.46E-14 | 3.93E-01 |
| 298.90163 | 85.03  | 14.92 | 14.84 | 14.11 | 14.51 | 3.18E-05  | 9.63E-01 | 4.17E-05 | 1.06E-01 | 5.10E-04 | 2.95E-01 | 1.50E-01 |
| 298.93287 | 32.6   | 15.95 | 14.29 | 15.16 | 14.89 | 5.32E-05  | 1.43E-05 | 9.44E-02 | 1.51E-02 | 6.52E-02 | 3.49E-01 | 8.76E-01 |
| 298.9535  | 30.99  | 15.89 | 16.74 | 17.10 | 16.63 | 6.95E-19  | 9.90E-11 | 4.13E-14 | 4.67E-08 | 1.96E-02 | 8.08E-01 | 1.26E-03 |
| 298.97303 | 37.55  | 13.61 | 14.58 | 14.76 | 14.09 | 1.03E-05  | 4.22E-04 | 1.45E-05 | 1.99E-01 | 8.82E-01 | 2.28E-01 | 4.34E-02 |
| 299.05782 | 64.23  | 13.78 | 18.68 | 11.70 | 12.48 | 5.23E-131 | 5.11E-15 | 5.11E-15 | 4.37E-14 | 5.11E-15 | 5.11E-15 | 1.10E-07 |
| 299.0698  | 35.43  | 19.40 | 19.72 | 20.08 | 19.14 | 3.92E-05  | 3.35E-01 | 2.39E-03 | 5.61E-01 | 2.65E-01 | 2.35E-02 | 3.12E-05 |
| 299.0787  | 24.66  | 15.49 | 17.44 | 14.56 | 14.83 | 5.15E-97  | 5.11E-15 | 7.77E-15 | 2.54E-13 | 5.11E-15 | 5.11E-15 | 4.86E-03 |
| 299.08115 | 290.58 | 17.81 | 15.16 | 16.97 | 17.12 | 9.55E-29  | 5.11E-15 | 1.70E-04 | 4.74E-03 | 4.46E-14 | 4.35E-14 | 8.86E-01 |
| 299.10243 | 23.04  | 16.15 | 17.04 | 16.95 | 16.82 | 8.02E-10  | 6.32E-09 | 1.21E-07 | 3.05E-05 | 9.34E-01 | 4.40E-01 | 7.88E-01 |
| 299.11401 | 153.3  | 15.13 | 14.44 | 13.93 | 14.44 | 2.04E-10  | 2.46E-04 | 1.94E-11 | 3.33E-04 | 1.28E-02 | 1.00E+00 | 1.76E-02 |
| 299.15044 | 157.4  | 15.84 | 15.33 | 15.76 | 15.38 | 1.14E-03  | 4.80E-03 | 9.51E-01 | 1.90E-02 | 2.90E-02 | 9.86E-01 | 8.42E-02 |
| 299.18695 | 194.27 | 17.16 | 16.45 | 16.73 | 16.60 | 3.84E-07  | 2.63E-07 | 3.24E-03 | 1.09E-04 | 1.35E-01 | 6.78E-01 | 7.56E-01 |
| 299.20201 | 194.19 | 18.17 | 15.87 | 16.75 | 16.86 | 3.22E-30  | 5.11E-15 | 4.65E-14 | 1.57E-12 | 2.19E-06 | 2.33E-07 | 9.23E-01 |
| 299.20224 | 53.51  | 16.12 | 12.88 | 14.83 | 14.99 | 4.25E-14  | 4.51E-14 | 3.10E-03 | 1.70E-02 | 2.86E-06 | 9.56E-07 | 9.78E-01 |
| 299.22335 | 234.39 | 21.86 | 21.87 | 21.91 | 21.95 | 7.88E-01  | 9.99E-01 | 9.45E-01 | 7.78E-01 | 9.79E-01 | 8.61E-01 | 9.78E-01 |
| 299.25101 | 178.36 | 17.73 | 17.27 | 16.97 | 17.39 | 6.78E-08  | 1.13E-03 | 1.06E-08 | 3.65E-02 | 8.24E-02 | 7.75E-01 | 6.31E-03 |
| 299.25957 | 206.19 | 21.60 | 20.47 | 21.01 | 21.03 | 9.73E-13  | 9.94E-14 | 8.67E-05 | 2.74E-04 | 8.61E-04 | 8.72E-04 | 9.99E-01 |

|           |        |       |       |       |       |          |          |          |          |          |          |          |
|-----------|--------|-------|-------|-------|-------|----------|----------|----------|----------|----------|----------|----------|
| 299.88181 | 30.52  | 17.10 | 15.51 | 16.66 | 16.99 | 2.55E-14 | 2.33E-13 | 1.18E-01 | 9.59E-01 | 1.37E-07 | 5.06E-11 | 3.68E-01 |
| 299.97516 | 33.79  | 17.75 | 18.70 | 18.66 | 18.00 | 1.63E-20 | 4.29E-14 | 4.73E-14 | 1.03E-01 | 9.68E-01 | 5.59E-09 | 4.62E-08 |
| 300.04048 | 21.3   | 20.19 | 21.35 | 21.20 | 20.78 | 1.21E-33 | 5.11E-15 | 6.22E-15 | 5.20E-10 | 3.18E-01 | 3.46E-09 | 1.28E-05 |
| 300.04986 | 18.39  | 20.50 | 20.98 | 20.95 | 21.23 | 4.50E-05 | 8.59E-03 | 1.30E-02 | 1.70E-05 | 9.99E-01 | 3.57E-01 | 2.71E-01 |
| 300.0595  | 18.33  | 16.58 | 16.11 | 16.89 | 16.72 | 2.06E-02 | 2.37E-01 | 5.93E-01 | 9.48E-01 | 1.30E-02 | 9.70E-02 | 9.15E-01 |
| 300.20196 | 166.51 | 16.06 | 15.76 | 15.55 | 15.11 | 5.75E-04 | 5.25E-01 | 8.82E-02 | 2.13E-04 | 7.74E-01 | 2.75E-02 | 2.31E-01 |
| 300.22646 | 223.35 | 19.29 | 19.17 | 19.30 | 19.38 | 2.16E-01 | 5.74E-01 | 1.00E+00 | 7.96E-01 | 5.29E-01 | 1.53E-01 | 8.52E-01 |
| 300.25483 | 181.25 | 14.84 | 14.12 | 14.74 | 14.85 | 1.07E-04 | 2.84E-04 | 9.32E-01 | 1.00E+00 | 3.39E-03 | 6.18E-04 | 9.36E-01 |
| 300.26288 | 201.66 | 19.57 | 18.78 | 18.91 | 18.94 | 4.90E-09 | 1.72E-08 | 2.81E-06 | 1.58E-05 | 7.33E-01 | 6.39E-01 | 9.98E-01 |
| 300.8599  | 74.81  | 17.10 | 17.56 | 18.30 | 18.24 | 1.43E-37 | 1.20E-06 | 5.11E-15 | 5.11E-15 | 5.12E-14 | 2.75E-12 | 9.21E-01 |
| 300.8752  | 130.44 | 16.89 | 15.81 | 15.31 | 16.67 | 1.82E-11 | 2.36E-05 | 2.05E-10 | 7.84E-01 | 1.44E-01 | 2.44E-03 | 2.40E-07 |
| 300.88504 | 43.85  | 12.73 | 11.21 | 14.54 | 14.33 | 1.46E-12 | 4.25E-03 | 3.48E-04 | 3.20E-03 | 2.83E-11 | 1.51E-09 | 9.70E-01 |
| 300.89055 | 92.78  | 16.97 | 15.33 | 15.90 | 16.54 | 8.36E-39 | 5.11E-15 | 3.86E-14 | 3.92E-04 | 1.06E-06 | 2.51E-14 | 6.15E-08 |
| 300.93243 | 165.5  | 12.97 | 15.53 | 15.58 | 15.68 | 2.80E-25 | 4.13E-14 | 4.33E-14 | 4.24E-14 | 9.99E-01 | 9.49E-01 | 9.80E-01 |
| 300.95356 | 154.26 | 17.32 | 15.72 | 15.38 | 16.58 | 1.57E-22 | 4.59E-14 | 3.53E-14 | 6.54E-04 | 2.79E-01 | 7.28E-05 | 1.19E-08 |
| 301.00943 | 27.76  | 16.49 | 16.21 | 16.30 | 16.28 | 3.37E-01 | 3.02E-01 | 6.11E-01 | 5.52E-01 | 9.54E-01 | 9.82E-01 | 9.99E-01 |
| 301.02366 | 24.72  | 16.03 | 16.70 | 15.65 | 15.76 | 1.24E-06 | 3.64E-03 | 1.96E-01 | 5.34E-01 | 1.54E-06 | 4.44E-05 | 9.44E-01 |
| 301.04412 | 16.83  | 17.26 | 18.26 | 18.45 | 18.31 | 7.52E-17 | 4.59E-11 | 4.88E-14 | 1.16E-11 | 5.33E-01 | 9.78E-01 | 8.00E-01 |
| 301.0538  | 28.53  | 17.11 | 17.82 | 16.88 | 17.17 | 3.95E-08 | 2.07E-05 | 4.07E-01 | 9.81E-01 | 1.90E-08 | 2.87E-04 | 2.54E-01 |
| 301.05969 | 29.4   | 16.25 | 16.99 | 17.10 | 16.30 | 5.41E-12 | 5.94E-07 | 4.63E-09 | 9.82E-01 | 8.33E-01 | 1.31E-05 | 2.00E-07 |
| 301.06654 | 18.11  | 16.04 | 12.69 | 12.31 | 13.44 | 1.89E-25 | 4.04E-14 | 1.60E-14 | 2.94E-12 | 6.56E-01 | 1.38E-01 | 6.11E-03 |
| 301.0759  | 28.4   | 13.52 | 15.11 | 11.35 | 12.04 | 6.11E-63 | 4.44E-14 | 5.11E-15 | 4.31E-14 | 5.11E-15 | 5.11E-15 | 2.38E-04 |
| 301.09249 | 88.45  | 10.89 | 12.93 | 13.46 | 14.91 | 4.40E-09 | 3.06E-03 | 7.90E-05 | 9.28E-10 | 8.12E-01 | 8.23E-03 | 8.52E-02 |
| 301.10582 | 208.77 | 14.96 | 9.05  | 8.99  | 9.20  | 1.01E-44 | 5.11E-15 | 5.11E-15 | 5.11E-15 | 9.99E-01 | 9.84E-01 | 9.58E-01 |
| 301.11846 | 26.91  | 14.76 | 16.84 | 17.42 | 16.46 | 1.72E-34 | 1.62E-14 | 5.11E-15 | 4.35E-14 | 1.09E-02 | 2.01E-01 | 5.86E-06 |
| 301.12976 | 157.12 | 14.46 | 14.41 | 15.52 | 14.13 | 3.68E-06 | 9.99E-01 | 3.52E-04 | 6.31E-01 | 3.09E-04 | 7.41E-01 | 5.66E-06 |
| 301.13033 | 18.94  | 12.59 | 12.72 | 12.60 | 11.86 | 1.43E-01 | 9.86E-01 | 1.00E+00 | 2.49E-01 | 9.90E-01 | 1.45E-01 | 2.51E-01 |
| 301.15797 | 31.04  | 15.67 | 16.76 | 17.11 | 16.26 | 1.22E-13 | 2.17E-08 | 2.00E-13 | 7.44E-03 | 2.33E-01 | 3.98E-02 | 5.30E-05 |
| 301.16661 | 214.07 | 18.32 | 19.63 | 19.66 | 18.68 | 5.38E-31 | 1.47E-14 | 9.33E-15 | 1.18E-02 | 9.96E-01 | 8.42E-13 | 1.84E-13 |
| 301.20384 | 154.93 | 14.97 | 16.22 | 15.44 | 14.48 | 2.53E-11 | 3.73E-07 | 1.47E-01 | 1.39E-01 | 4.08E-03 | 1.63E-11 | 2.98E-04 |
| 301.20976 | 207.76 | 16.26 | 15.41 | 15.12 | 16.08 | 1.36E-04 | 1.43E-02 | 3.22E-04 | 9.26E-01 | 7.39E-01 | 1.07E-01 | 6.42E-03 |
| 301.21779 | 214.6  | 27.54 | 27.42 | 27.46 | 27.48 | 8.42E-01 | 8.04E-01 | 9.36E-01 | 9.75E-01 | 9.89E-01 | 9.70E-01 | 9.99E-01 |
| 301.21807 | 101.39 | 21.05 | 19.51 | 20.40 | 20.88 | 3.62E-21 | 3.93E-14 | 7.98E-05 | 6.93E-01 | 6.44E-08 | 4.31E-14 | 1.03E-02 |
| 301.23901 | 257.26 | 23.94 | 24.14 | 24.17 | 24.07 | 3.34E-04 | 3.26E-03 | 3.23E-04 | 1.13E-01 | 9.41E-01 | 6.79E-01 | 3.35E-01 |
| 301.92582 | 22.27  | 18.40 | 18.64 | 18.51 | 18.92 | 2.12E-03 | 3.05E-01 | 8.59E-01 | 1.14E-03 | 7.84E-01 | 1.81E-01 | 1.77E-02 |
| 302.02913 | 19.4   | 14.73 | 14.40 | 14.61 | 15.69 | 4.15E-04 | 6.78E-01 | 9.76E-01 | 1.08E-02 | 8.99E-01 | 3.37E-04 | 3.65E-03 |
| 302.03624 | 20.82  | 14.49 | 15.67 | 15.48 | 14.54 | 1.76E-06 | 5.50E-05 | 8.52E-04 | 9.97E-01 | 8.97E-01 | 3.31E-04 | 3.64E-03 |
| 302.05584 | 20.25  | 16.26 | 16.54 | 16.37 | 16.24 | 4.33E-01 | 4.84E-01 | 9.45E-01 | 9.99E-01 | 8.26E-01 | 4.57E-01 | 9.17E-01 |
| 302.06707 | 23.1   | 20.52 | 22.15 | 22.03 | 20.98 | 4.19E-06 | 3.80E-05 | 1.41E-04 | 5.85E-01 | 9.86E-01 | 9.96E-03 | 2.50E-02 |
| 302.08876 | 141.02 | 14.69 | 11.43 | 11.47 | 12.80 | 6.90E-39 | 5.11E-15 | 5.11E-15 | 1.34E-13 | 9.97E-01 | 1.18E-07 | 2.60E-07 |
| 302.10139 | 173.95 | 14.98 | 16.12 | 16.63 | 16.19 | 1.26E-14 | 9.12E-08 | 5.05E-14 | 2.88E-08 | 4.81E-02 | 9.84E-01 | 1.32E-01 |
| 302.10177 | 22     | 22.66 | 23.22 | 23.18 | 22.86 | 2.78E-06 | 1.71E-05 | 6.64E-05 | 3.25E-01 | 9.86E-01 | 2.14E-02 | 5.02E-02 |
| 302.15577 | 29.69  | 17.24 | 15.58 | 15.70 | 15.53 | 2.69E-08 | 1.35E-06 | 6.85E-06 | 1.17E-06 | 9.81E-01 | 9.99E-01 | 9.51E-01 |
| 302.16849 | 215.77 | 13.55 | 15.87 | 15.91 | 14.34 | 3.16E-18 | 9.43E-14 | 5.23E-14 | 3.12E-02 | 9.98E-01 | 2.49E-06 | 8.92E-07 |
| 302.22103 | 209.95 | 25.34 | 25.13 | 25.33 | 25.23 | 4.40E-01 | 4.58E-01 | 1.00E+00 | 8.71E-01 | 5.23E-01 | 9.15E-01 | 9.07E-01 |

|           |        |       |       |       |       |          |          |          |          |          |          |          |
|-----------|--------|-------|-------|-------|-------|----------|----------|----------|----------|----------|----------|----------|
| 302.22126 | 97.43  | 18.59 | 16.51 | 17.69 | 18.01 | 3.56E-18 | 4.22E-14 | 1.08E-04 | 3.47E-02 | 3.53E-07 | 3.43E-10 | 4.55E-01 |
| 302.24236 | 263.82 | 21.32 | 21.60 | 21.66 | 21.52 | 5.42E-07 | 4.62E-05 | 5.68E-07 | 9.81E-03 | 8.19E-01 | 5.83E-01 | 1.46E-01 |
| 302.53453 | 17.52  | 15.41 | 16.69 | 16.84 | 16.39 | 4.13E-11 | 1.68E-08 | 2.35E-10 | 4.02E-05 | 9.04E-01 | 5.07E-01 | 1.68E-01 |
| 302.83861 | 45.73  | 17.93 | 16.72 | 19.69 | 19.05 | 6.01E-33 | 9.97E-08 | 5.22E-14 | 1.89E-06 | 5.11E-15 | 3.55E-14 | 1.75E-02 |
| 302.84893 | 45.7   | 19.82 | 17.56 | 19.61 | 19.98 | 4.72E-35 | 5.11E-15 | 5.85E-01 | 8.18E-01 | 1.02E-14 | 5.11E-15 | 1.70E-01 |
| 302.85785 | 82.52  | 14.85 | 14.27 | 15.09 | 15.23 | 9.84E-03 | 1.86E-01 | 8.36E-01 | 5.71E-01 | 2.93E-02 | 9.55E-03 | 9.65E-01 |
| 302.8649  | 159.66 | 16.69 | 15.22 | 15.05 | 15.95 | 2.94E-24 | 4.44E-14 | 2.69E-14 | 1.86E-05 | 6.82E-01 | 4.25E-05 | 2.04E-07 |
| 302.91072 | 37.79  | 21.81 | 22.30 | 21.71 | 21.40 | 4.92E-03 | 1.68E-01 | 9.75E-01 | 3.22E-01 | 7.46E-02 | 2.08E-03 | 5.78E-01 |
| 302.91121 | 239.47 | 18.16 | 16.96 | 17.41 | 17.52 | 9.31E-14 | 5.25E-14 | 9.65E-07 | 6.97E-05 | 9.47E-03 | 1.13E-03 | 8.86E-01 |
| 302.92456 | 234.09 | 17.64 | 16.49 | 17.09 | 17.11 | 1.31E-13 | 5.02E-14 | 2.13E-04 | 7.39E-04 | 9.68E-05 | 8.82E-05 | 9.98E-01 |
| 302.96926 | 41.46  | 18.41 | 19.53 | 19.30 | 19.47 | 7.69E-08 | 5.38E-07 | 8.74E-05 | 4.85E-06 | 6.78E-01 | 9.90E-01 | 8.61E-01 |
| 302.9832  | 25.54  | 16.32 | 16.53 | 17.09 | 16.01 | 1.22E-01 | 9.60E-01 | 2.90E-01 | 9.05E-01 | 6.04E-01 | 6.72E-01 | 9.11E-02 |
| 303.01633 | 26.32  | 16.20 | 18.40 | 18.60 | 18.12 | 3.67E-24 | 4.40E-14 | 3.26E-14 | 8.70E-14 | 8.22E-01 | 6.32E-01 | 1.74E-01 |
| 303.01885 | 233.67 | 16.09 | 14.49 | 15.24 | 15.71 | 2.12E-11 | 8.80E-12 | 4.47E-04 | 2.93E-01 | 3.74E-03 | 1.01E-06 | 1.61E-01 |
| 303.03704 | 187.7  | 10.41 | 13.02 | 13.00 | 13.07 | 6.26E-18 | 1.58E-13 | 1.60E-13 | 2.12E-13 | 1.00E+00 | 9.99E-01 | 9.96E-01 |
| 303.04358 | 239.87 | 16.61 | 15.18 | 15.51 | 15.97 | 3.21E-08 | 2.55E-08 | 2.54E-05 | 4.36E-02 | 4.89E-01 | 7.70E-03 | 2.42E-01 |
| 303.05115 | 18.87  | 20.81 | 20.57 | 20.97 | 21.19 | 2.37E-02 | 6.17E-01 | 8.30E-01 | 2.18E-01 | 1.84E-01 | 1.43E-02 | 6.96E-01 |
| 303.06072 | 233.8  | 17.22 | 16.29 | 16.66 | 16.55 | 4.47E-09 | 1.68E-09 | 4.13E-04 | 3.01E-05 | 5.51E-02 | 3.15E-01 | 8.75E-01 |
| 303.06859 | 23.71  | 16.40 | 16.85 | 18.49 | 16.90 | 1.34E-03 | 8.45E-01 | 8.54E-04 | 8.10E-01 | 1.87E-02 | 1.00E+00 | 2.97E-02 |
| 303.0725  | 70.75  | 11.17 | 19.82 | 5.01  | 5.37  | 1.18E-58 | 5.77E-15 | 4.35E-14 | 2.27E-13 | 5.11E-15 | 5.11E-15 | 9.60E-01 |
| 303.08436 | 18.92  | 15.50 | 15.97 | 16.38 | 17.11 | 7.69E-07 | 3.31E-01 | 8.00E-03 | 2.42E-07 | 4.58E-01 | 6.52E-04 | 5.79E-02 |
| 303.10524 | 25.71  | 18.98 | 19.47 | 19.47 | 19.14 | 7.53E-05 | 6.17E-04 | 5.33E-04 | 6.09E-01 | 1.00E+00 | 5.61E-02 | 5.30E-02 |
| 303.10548 | 226.25 | 16.60 | 15.60 | 16.18 | 16.33 | 4.20E-05 | 1.22E-05 | 1.67E-01 | 5.57E-01 | 3.06E-02 | 5.24E-03 | 9.07E-01 |
| 303.11171 | 289.34 | 17.19 | 14.75 | 13.65 | 14.47 | 1.37E-14 | 1.13E-07 | 5.95E-14 | 8.14E-09 | 5.43E-02 | 9.24E-01 | 2.46E-01 |
| 303.11967 | 200.85 | 16.51 | 15.42 | 14.20 | 14.54 | 3.86E-07 | 5.06E-02 | 5.32E-07 | 5.20E-05 | 2.53E-02 | 2.00E-01 | 8.65E-01 |
| 303.16453 | 231.81 | 17.40 | 16.40 | 16.76 | 17.41 | 2.28E-02 | 4.03E-02 | 3.14E-01 | 1.00E+00 | 7.81E-01 | 5.76E-02 | 3.62E-01 |
| 303.20019 | 171.92 | 15.42 | 16.20 | 14.58 | 15.89 | 1.25E-04 | 1.31E-01 | 8.57E-02 | 5.83E-01 | 8.33E-05 | 8.38E-01 | 3.24E-03 |
| 303.22453 | 216.33 | 21.93 | 21.72 | 21.97 | 21.80 | 5.05E-01 | 6.38E-01 | 9.97E-01 | 8.88E-01 | 5.31E-01 | 9.75E-01 | 8.07E-01 |
| 303.23351 | 239.28 | 30.78 | 30.81 | 31.05 | 31.12 | 2.96E-04 | 9.79E-01 | 1.39E-02 | 1.55E-03 | 5.35E-02 | 7.96E-03 | 8.77E-01 |
| 303.40689 | 233.98 | 17.05 | 16.13 | 16.49 | 16.66 | 1.82E-09 | 2.79E-10 | 2.12E-04 | 2.67E-02 | 3.76E-02 | 9.75E-04 | 6.11E-01 |
| 303.42692 | 240.03 | 16.60 | 15.63 | 15.88 | 16.12 | 1.98E-11 | 1.06E-11 | 4.29E-07 | 2.11E-03 | 2.24E-01 | 2.41E-03 | 3.07E-01 |
| 303.43458 | 234.04 | 16.66 | 15.01 | 15.73 | 15.98 | 2.86E-16 | 4.46E-14 | 9.03E-07 | 9.28E-04 | 3.82E-04 | 1.69E-06 | 5.17E-01 |
| 303.54383 | 234.04 | 17.49 | 16.39 | 16.89 | 17.09 | 1.09E-12 | 1.61E-13 | 6.44E-05 | 2.19E-02 | 1.72E-03 | 8.12E-06 | 4.83E-01 |
| 303.55718 | 234.25 | 18.15 | 17.38 | 17.82 | 17.92 | 8.82E-10 | 1.33E-10 | 1.18E-02 | 1.73E-01 | 7.12E-04 | 2.77E-05 | 7.93E-01 |
| 303.91503 | 35.58  | 16.99 | 17.71 | 17.57 | 17.14 | 1.26E-07 | 1.02E-06 | 9.98E-05 | 7.05E-01 | 7.36E-01 | 3.72E-04 | 1.13E-02 |
| 303.9228  | 26.17  | 16.55 | 16.71 | 16.44 | 17.08 | 6.79E-05 | 6.16E-01 | 8.22E-01 | 9.40E-04 | 1.78E-01 | 5.17E-02 | 4.53E-05 |
| 304.00313 | 32.71  | 15.92 | 17.23 | 17.49 | 16.07 | 1.01E-27 | 4.37E-14 | 2.64E-14 | 7.47E-01 | 2.96E-01 | 3.23E-12 | 4.29E-14 |
| 304.00932 | 29.36  | 15.85 | 16.27 | 16.21 | 16.04 | 8.51E-03 | 9.29E-03 | 3.24E-02 | 5.01E-01 | 9.72E-01 | 3.55E-01 | 6.07E-01 |
| 304.03506 | 18.29  | 18.23 | 19.46 | 19.44 | 19.21 | 6.26E-15 | 1.90E-12 | 1.90E-12 | 3.66E-08 | 1.00E+00 | 4.56E-01 | 4.91E-01 |
| 304.0547  | 22.64  | 17.27 | 16.62 | 17.11 | 17.43 | 7.21E-05 | 8.77E-04 | 7.75E-01 | 8.23E-01 | 2.47E-02 | 6.68E-05 | 2.99E-01 |
| 304.06261 | 20.13  | 19.89 | 21.44 | 21.27 | 20.89 | 2.95E-15 | 9.23E-14 | 9.60E-12 | 1.93E-06 | 8.03E-01 | 2.94E-02 | 2.19E-01 |
| 304.0717  | 24.32  | 18.02 | 19.64 | 19.04 | 19.03 | 6.08E-19 | 4.06E-14 | 1.86E-09 | 1.07E-08 | 1.58E-03 | 1.80E-03 | 1.00E+00 |
| 304.10577 | 27.25  | 16.48 | 16.18 | 16.30 | 16.04 | 8.34E-03 | 8.75E-02 | 4.68E-01 | 4.91E-03 | 8.03E-01 | 7.28E-01 | 2.19E-01 |
| 304.13513 | 27.1   | 18.82 | 18.46 | 18.74 | 18.41 | 1.20E-02 | 5.89E-02 | 9.44E-01 | 3.05E-02 | 2.17E-01 | 9.90E-01 | 1.29E-01 |
| 304.2276  | 211.68 | 18.23 | 18.04 | 18.22 | 18.14 | 5.82E-01 | 5.77E-01 | 9.99E-01 | 9.21E-01 | 6.67E-01 | 9.34E-01 | 9.57E-01 |

|           |        |       |       |       |       |          |          |          |          |          |          |          |
|-----------|--------|-------|-------|-------|-------|----------|----------|----------|----------|----------|----------|----------|
| 304.23604 | 240.03 | 28.74 | 28.56 | 28.91 | 29.02 | 5.11E-06 | 1.72E-01 | 1.89E-01 | 8.74E-03 | 5.86E-04 | 5.49E-06 | 6.07E-01 |
| 304.83771 | 69.93  | 15.33 | 15.32 | 16.51 | 15.57 | 1.37E-16 | 1.00E+00 | 6.59E-14 | 3.56E-01 | 1.06E-13 | 3.36E-01 | 5.27E-09 |
| 304.84924 | 86.41  | 22.05 | 22.28 | 22.52 | 22.14 | 1.68E-06 | 4.53E-02 | 9.13E-07 | 7.45E-01 | 3.80E-02 | 4.34E-01 | 2.79E-04 |
| 304.86211 | 128.39 | 14.94 | 13.44 | 13.30 | 14.33 | 2.65E-15 | 2.68E-11 | 3.00E-13 | 2.27E-02 | 9.10E-01 | 2.81E-04 | 1.52E-05 |
| 304.87006 | 105.03 | 15.84 | 15.19 | 15.45 | 15.46 | 8.52E-08 | 1.42E-08 | 1.12E-03 | 2.23E-03 | 7.54E-02 | 7.93E-02 | 1.00E+00 |
| 304.88618 | 92.28  | 13.85 | 14.43 | 14.98 | 14.52 | 4.44E-10 | 1.72E-03 | 4.26E-11 | 2.71E-04 | 3.87E-03 | 9.43E-01 | 2.92E-02 |
| 304.91208 | 34.11  | 17.62 | 18.15 | 17.72 | 18.02 | 3.09E-02 | 3.80E-02 | 9.57E-01 | 2.11E-01 | 1.42E-01 | 9.13E-01 | 4.81E-01 |
| 304.92758 | 36.87  | 21.98 | 23.25 | 23.13 | 23.04 | 2.40E-32 | 5.11E-15 | 7.99E-15 | 3.67E-14 | 6.45E-01 | 1.63E-01 | 7.75E-01 |
| 304.94061 | 25.16  | 12.97 | 14.53 | 14.93 | 13.72 | 1.54E-10 | 7.74E-07 | 3.26E-10 | 5.22E-02 | 5.31E-01 | 4.02E-02 | 4.76E-04 |
| 304.96494 | 37.65  | 14.23 | 14.33 | 15.43 | 15.18 | 3.91E-02 | 9.97E-01 | 6.98E-02 | 2.40E-01 | 1.30E-01 | 3.61E-01 | 9.63E-01 |
| 304.9843  | 21.17  | 17.40 | 19.76 | 19.75 | 19.30 | 1.43E-31 | 5.77E-15 | 5.77E-15 | 4.24E-14 | 1.00E+00 | 1.01E-01 | 1.18E-01 |
| 304.99233 | 16.9   | 12.63 | 14.99 | 15.18 | 15.08 | 2.52E-23 | 4.24E-14 | 4.20E-14 | 4.42E-14 | 8.87E-01 | 9.89E-01 | 9.80E-01 |
| 305.0184  | 18.97  | 17.72 | 18.27 | 18.37 | 18.33 | 6.80E-03 | 4.60E-02 | 1.08E-02 | 2.76E-02 | 9.66E-01 | 9.95E-01 | 9.97E-01 |
| 305.03847 | 17.8   | 14.21 | 14.31 | 14.51 | 14.16 | 7.87E-01 | 9.93E-01 | 8.29E-01 | 9.99E-01 | 9.44E-01 | 9.80E-01 | 7.85E-01 |
| 305.04798 | 22.08  | 19.23 | 19.10 | 19.35 | 19.57 | 9.00E-02 | 8.88E-01 | 9.09E-01 | 2.49E-01 | 5.28E-01 | 6.39E-02 | 6.33E-01 |
| 305.06938 | 20.69  | 18.73 | 21.23 | 21.40 | 21.23 | 6.17E-20 | 5.45E-14 | 4.29E-14 | 9.64E-14 | 9.47E-01 | 1.00E+00 | 9.46E-01 |
| 305.12704 | 291.43 | 18.32 | 15.81 | 16.07 | 16.31 | 2.14E-15 | 1.56E-13 | 1.33E-11 | 5.52E-09 | 8.44E-01 | 4.05E-01 | 8.68E-01 |
| 305.17629 | 292.6  | 17.47 | 16.47 | 16.95 | 16.41 | 2.07E-04 | 1.00E-03 | 1.91E-01 | 5.89E-04 | 2.77E-01 | 9.96E-01 | 1.96E-01 |
| 305.23965 | 240.64 | 25.50 | 25.09 | 25.49 | 25.65 | 1.59E-06 | 2.81E-04 | 1.00E+00 | 4.43E-01 | 5.02E-04 | 1.11E-06 | 4.22E-01 |
| 305.24896 | 256.95 | 28.39 | 27.88 | 28.08 | 28.42 | 1.33E-11 | 2.27E-09 | 4.24E-04 | 9.88E-01 | 6.19E-02 | 2.60E-09 | 2.79E-04 |
| 305.57143 | 18.05  | 16.12 | 18.81 | 18.88 | 18.96 | 6.39E-17 | 2.20E-12 | 4.40E-13 | 5.75E-13 | 9.97E-01 | 9.77E-01 | 9.96E-01 |
| 305.85269 | 84.44  | 16.49 | 16.60 | 16.99 | 16.58 | 6.83E-11 | 3.51E-01 | 7.31E-11 | 5.75E-01 | 1.47E-06 | 9.89E-01 | 5.69E-07 |
| 305.91164 | 30.58  | 11.59 | 13.83 | 14.55 | 13.66 | 5.31E-08 | 5.44E-05 | 3.45E-08 | 3.43E-04 | 4.78E-01 | 9.89E-01 | 3.14E-01 |
| 305.92064 | 32.22  | 15.05 | 14.53 | 14.77 | 14.44 | 1.08E-01 | 1.95E-01 | 7.03E-01 | 1.16E-01 | 8.03E-01 | 9.91E-01 | 6.43E-01 |
| 305.93089 | 43.78  | 17.05 | 18.36 | 18.21 | 18.12 | 2.90E-40 | 5.11E-15 | 5.11E-15 | 6.22E-15 | 3.06E-01 | 3.87E-02 | 7.42E-01 |
| 305.96169 | 34.02  | 15.77 | 15.21 | 16.00 | 15.34 | 3.73E-03 | 8.02E-02 | 7.43E-01 | 2.89E-01 | 5.53E-03 | 9.46E-01 | 3.76E-02 |
| 306.04035 | 285.6  | 16.41 | 16.50 | 16.62 | 17.47 | 5.46E-03 | 9.92E-01 | 9.03E-01 | 5.44E-03 | 9.80E-01 | 1.68E-02 | 4.53E-02 |
| 306.06877 | 19.71  | 15.26 | 16.11 | 16.45 | 16.16 | 1.45E-03 | 3.53E-02 | 9.60E-04 | 2.79E-02 | 7.19E-01 | 9.99E-01 | 8.18E-01 |
| 306.07741 | 22.4   | 25.38 | 26.54 | 26.13 | 25.56 | 3.23E-05 | 4.76E-05 | 1.64E-02 | 8.90E-01 | 3.93E-01 | 1.95E-03 | 1.48E-01 |
| 306.11161 | 212.7  | 15.54 | 10.01 | 10.07 | 11.03 | 3.79E-51 | 5.11E-15 | 5.11E-15 | 5.11E-15 | 9.97E-01 | 1.10E-02 | 1.81E-02 |
| 306.24162 | 233.76 | 21.15 | 20.60 | 20.97 | 21.10 | 7.45E-08 | 9.25E-08 | 2.19E-01 | 9.44E-01 | 7.73E-04 | 6.16E-06 | 5.78E-01 |
| 306.25232 | 251.7  | 26.26 | 25.61 | 26.02 | 26.19 | 1.60E-10 | 2.47E-10 | 5.27E-02 | 8.92E-01 | 1.40E-04 | 8.40E-08 | 3.09E-01 |
| 306.85299 | 102.18 | 14.53 | 14.11 | 14.04 | 13.96 | 3.12E-02 | 1.75E-01 | 8.06E-02 | 3.57E-02 | 9.88E-01 | 8.95E-01 | 9.79E-01 |
| 306.86491 | 71.18  | 22.27 | 22.40 | 22.94 | 22.53 | 2.58E-17 | 2.56E-01 | 4.51E-14 | 2.97E-03 | 1.35E-11 | 3.40E-01 | 4.44E-07 |
| 306.87755 | 30.1   | 12.87 | 14.70 | 14.45 | 14.00 | 9.14E-04 | 9.82E-04 | 5.52E-03 | 1.02E-01 | 9.57E-01 | 5.07E-01 | 8.03E-01 |
| 306.8987  | 33.35  | 13.73 | 14.04 | 14.68 | 14.26 | 6.43E-03 | 6.59E-01 | 2.94E-03 | 2.25E-01 | 1.04E-01 | 8.68E-01 | 4.66E-01 |
| 306.90465 | 83.9   | 16.24 | 15.09 | 15.75 | 16.19 | 3.43E-33 | 5.11E-15 | 1.08E-07 | 9.49E-01 | 2.31E-12 | 5.77E-15 | 6.71E-06 |
| 306.92257 | 36.1   | 18.68 | 19.75 | 19.97 | 19.41 | 4.02E-23 | 4.45E-14 | 2.53E-14 | 3.02E-08 | 2.47E-01 | 3.58E-02 | 5.09E-05 |
| 306.93143 | 44.84  | 15.96 | 16.53 | 16.41 | 16.37 | 8.55E-13 | 1.68E-12 | 2.11E-08 | 9.29E-07 | 3.51E-01 | 1.55E-01 | 9.56E-01 |
| 306.94122 | 20.92  | 13.27 | 12.67 | 13.93 | 14.07 | 3.71E-04 | 3.03E-01 | 2.17E-01 | 1.06E-01 | 2.30E-03 | 8.18E-04 | 9.78E-01 |
| 306.9815  | 43.7   | 16.66 | 13.80 | 14.77 | 14.10 | 9.11E-06 | 1.52E-05 | 7.94E-03 | 2.09E-04 | 3.78E-01 | 9.65E-01 | 6.97E-01 |
| 307.00395 | 27.24  | 16.36 | 17.97 | 17.81 | 17.75 | 7.55E-20 | 4.36E-14 | 5.62E-14 | 5.96E-13 | 7.96E-01 | 6.40E-01 | 9.91E-01 |
| 307.07466 | 25.53  | 19.71 | 21.14 | 20.86 | 20.53 | 1.21E-24 | 1.22E-14 | 4.41E-14 | 4.24E-09 | 1.16E-01 | 2.24E-05 | 4.87E-02 |
| 307.08084 | 19.4   | 22.03 | 23.03 | 22.59 | 22.05 | 4.71E-04 | 1.04E-03 | 1.33E-01 | 1.00E+00 | 3.72E-01 | 2.76E-03 | 1.95E-01 |
| 307.11534 | 22.37  | 17.72 | 18.93 | 18.34 | 18.03 | 7.41E-21 | 3.24E-14 | 4.20E-07 | 3.38E-02 | 2.80E-06 | 5.03E-12 | 4.85E-02 |

|           |        |       |       |       |       |           |          |          |          |          |          |          |
|-----------|--------|-------|-------|-------|-------|-----------|----------|----------|----------|----------|----------|----------|
| 307.12849 | 62.44  | 17.44 | 19.13 | 16.93 | 17.01 | 9.92E-93  | 5.11E-15 | 1.03E-12 | 4.09E-09 | 5.11E-15 | 5.11E-15 | 6.80E-01 |
| 307.14295 | 290.28 | 16.43 | 11.35 | 10.62 | 11.85 | 2.85E-34  | 7.33E-15 | 5.11E-15 | 3.94E-14 | 3.24E-01 | 6.73E-01 | 2.84E-02 |
| 307.15874 | 288.42 | 17.25 | 18.36 | 18.67 | 17.25 | 1.37E-14  | 3.33E-07 | 4.25E-11 | 1.00E+00 | 4.25E-01 | 1.35E-06 | 3.79E-10 |
| 307.19481 | 176.47 | 17.95 | 17.48 | 17.78 | 17.86 | 5.56E-02  | 3.81E-02 | 7.60E-01 | 9.56E-01 | 3.34E-01 | 1.73E-01 | 9.74E-01 |
| 307.19513 | 289.92 | 17.05 | 17.29 | 18.22 | 16.96 | 8.55E-11  | 5.52E-01 | 4.04E-09 | 9.63E-01 | 7.74E-06 | 3.17E-01 | 1.96E-09 |
| 307.22832 | 84.17  | 18.15 | 15.69 | 17.33 | 17.97 | 3.07E-15  | 6.43E-14 | 2.53E-02 | 9.32E-01 | 4.54E-07 | 1.15E-11 | 1.56E-01 |
| 307.25574 | 255.14 | 22.96 | 22.10 | 22.46 | 22.66 | 8.53E-14  | 5.80E-14 | 8.89E-06 | 2.31E-02 | 2.49E-03 | 1.66E-06 | 2.45E-01 |
| 307.26459 | 272.1  | 26.97 | 26.41 | 26.78 | 26.86 | 3.50E-06  | 1.56E-06 | 2.64E-01 | 7.35E-01 | 3.92E-03 | 4.25E-04 | 8.87E-01 |
| 307.86847 | 70.94  | 16.84 | 16.45 | 17.34 | 16.91 | 1.04E-28  | 4.20E-08 | 4.37E-13 | 6.85E-01 | 5.11E-15 | 6.16E-10 | 3.17E-09 |
| 307.91293 | 29.52  | 14.57 | 15.06 | 14.76 | 15.10 | 1.23E-01  | 2.07E-01 | 8.70E-01 | 1.65E-01 | 6.42E-01 | 9.98E-01 | 5.57E-01 |
| 307.93528 | 67.03  | 15.23 | 14.82 | 16.32 | 15.85 | 3.22E-09  | 2.79E-01 | 1.75E-05 | 4.65E-02 | 5.06E-09 | 1.87E-04 | 2.00E-01 |
| 307.97722 | 37.51  | 15.81 | 14.22 | 14.94 | 14.41 | 3.99E-05  | 5.16E-05 | 5.97E-02 | 7.00E-04 | 1.85E-01 | 9.57E-01 | 4.69E-01 |
| 308.03311 | 28.67  | 16.44 | 13.51 | 13.57 | 14.36 | 1.07E-11  | 4.62E-10 | 6.82E-10 | 2.20E-05 | 9.99E-01 | 2.45E-01 | 2.97E-01 |
| 308.06365 | 26.99  | 14.73 | 16.77 | 16.89 | 16.11 | 1.22E-31  | 6.66E-15 | 5.11E-15 | 3.85E-13 | 8.82E-01 | 1.53E-03 | 7.86E-05 |
| 308.07332 | 18.94  | 20.57 | 21.58 | 21.03 | 20.61 | 2.38E-03  | 2.92E-03 | 3.67E-01 | 9.99E-01 | 2.43E-01 | 8.69E-03 | 5.04E-01 |
| 308.12711 | 216.94 | 14.60 | 7.70  | 7.62  | 8.10  | 8.49E-61  | 5.11E-15 | 5.11E-15 | 5.11E-15 | 9.95E-01 | 7.00E-01 | 5.47E-01 |
| 308.12724 | 25.84  | 12.17 | 6.98  | 7.11  | 8.36  | 9.36E-29  | 9.10E-15 | 1.15E-14 | 6.52E-14 | 9.91E-01 | 1.64E-02 | 3.50E-02 |
| 308.25869 | 256.09 | 18.37 | 16.94 | 17.51 | 17.84 | 2.06E-16  | 4.31E-14 | 1.99E-07 | 4.06E-03 | 1.52E-03 | 3.27E-07 | 1.68E-01 |
| 308.26793 | 276.24 | 24.85 | 24.10 | 24.47 | 24.57 | 4.67E-09  | 5.31E-10 | 3.88E-03 | 7.23E-02 | 5.36E-03 | 3.56E-04 | 8.25E-01 |
| 308.84567 | 88.61  | 15.07 | 14.75 | 15.09 | 14.81 | 3.57E-04  | 4.71E-03 | 9.96E-01 | 4.13E-02 | 2.74E-03 | 9.27E-01 | 2.59E-02 |
| 308.85707 | 52.59  | 17.63 | 16.12 | 16.21 | 16.07 | 6.48E-12  | 2.78E-09 | 1.68E-08 | 2.05E-09 | 9.82E-01 | 9.97E-01 | 9.37E-01 |
| 308.86884 | 85.81  | 15.51 | 14.49 | 15.28 | 15.12 | 8.06E-10  | 2.81E-10 | 4.00E-01 | 5.05E-02 | 1.96E-06 | 4.08E-04 | 7.19E-01 |
| 308.9164  | 146.42 | 13.49 | 17.36 | 17.01 | 17.46 | 4.55E-23  | 4.29E-14 | 4.35E-14 | 4.27E-14 | 8.23E-01 | 9.95E-01 | 6.97E-01 |
| 308.91675 | 27.65  | 17.61 | 20.36 | 20.37 | 19.89 | 2.33E-47  | 5.11E-15 | 5.11E-15 | 5.11E-15 | 1.00E+00 | 3.75E-02 | 2.80E-02 |
| 308.94001 | 49.18  | 18.76 | 16.66 | 17.66 | 17.67 | 2.06E-09  | 1.73E-10 | 1.56E-03 | 2.73E-03 | 6.58E-03 | 8.49E-03 | 1.00E+00 |
| 308.96138 | 42.05  | 19.32 | 19.96 | 20.32 | 20.09 | 9.56E-16  | 2.29E-07 | 4.31E-14 | 1.06E-09 | 1.12E-02 | 6.83E-01 | 2.24E-01 |
| 308.98444 | 32.99  | 16.44 | 16.07 | 15.91 | 16.53 | 1.34E-06  | 1.57E-02 | 9.98E-05 | 8.96E-01 | 5.46E-01 | 2.84E-03 | 1.36E-05 |
| 309.02016 | 38.95  | 16.61 | 15.49 | 16.23 | 16.47 | 7.94E-03  | 6.13E-03 | 6.71E-01 | 9.80E-01 | 1.44E-01 | 3.21E-02 | 9.00E-01 |
| 309.07026 | 21.03  | 14.26 | 15.49 | 15.46 | 14.03 | 1.53E-05  | 3.25E-03 | 3.89E-03 | 9.18E-01 | 1.00E+00 | 6.48E-04 | 7.76E-04 |
| 309.07789 | 25     | 17.63 | 17.95 | 18.01 | 17.56 | 1.23E-01  | 4.56E-01 | 3.06E-01 | 9.89E-01 | 9.95E-01 | 3.27E-01 | 2.09E-01 |
| 309.08759 | 38.72  | 17.42 | 26.20 | 18.21 | 17.35 | 2.55E-125 | 5.11E-15 | 1.75E-04 | 9.85E-01 | 5.11E-15 | 5.11E-15 | 1.07E-04 |
| 309.10948 | 22.4   | 15.54 | 20.16 | 14.71 | 14.92 | 1.87E-42  | 5.11E-15 | 6.59E-02 | 2.76E-01 | 5.11E-15 | 5.11E-15 | 9.37E-01 |
| 309.12212 | 290.28 | 17.08 | 12.56 | 15.48 | 13.80 | 1.88E-22  | 2.66E-14 | 6.58E-04 | 1.58E-12 | 2.10E-10 | 2.41E-02 | 6.66E-04 |
| 309.16913 | 37.61  | 14.89 | 15.05 | 14.12 | 14.49 | 2.10E-03  | 9.15E-01 | 1.42E-02 | 4.40E-01 | 2.31E-03 | 1.64E-01 | 4.97E-01 |
| 309.17451 | 287.46 | 17.92 | 20.03 | 20.53 | 18.93 | 1.60E-65  | 5.11E-15 | 5.11E-15 | 4.42E-14 | 7.19E-05 | 4.29E-14 | 5.11E-15 |
| 309.1747  | 154.12 | 19.61 | 19.12 | 18.40 | 20.34 | 4.38E-10  | 2.51E-01 | 3.56E-05 | 3.56E-02 | 3.88E-02 | 9.86E-05 | 1.31E-10 |
| 309.20695 | 185.77 | 18.57 | 16.75 | 17.10 | 17.42 | 2.25E-21  | 3.93E-14 | 5.08E-14 | 3.30E-09 | 1.82E-01 | 1.39E-03 | 2.83E-01 |
| 309.22284 | 233.45 | 16.48 | 14.46 | 15.76 | 15.80 | 3.29E-15  | 4.39E-14 | 6.31E-03 | 1.64E-02 | 1.84E-07 | 1.85E-07 | 9.98E-01 |
| 309.24395 | 172.09 | 15.59 | 13.37 | 13.76 | 14.59 | 1.11E-16  | 4.29E-14 | 1.31E-11 | 6.70E-04 | 4.03E-01 | 2.90E-05 | 8.50E-03 |
| 309.27125 | 276.14 | 21.30 | 20.45 | 20.83 | 20.96 | 2.00E-08  | 2.71E-09 | 1.78E-03 | 5.96E-02 | 2.50E-02 | 1.35E-03 | 7.52E-01 |
| 309.28032 | 295.53 | 20.68 | 21.21 | 22.29 | 20.88 | 3.22E-06  | 3.24E-01 | 2.77E-06 | 9.22E-01 | 4.82E-03 | 7.48E-01 | 1.48E-04 |
| 309.9483  | 23.32  | 14.73 | 15.04 | 14.32 | 14.47 | 3.35E-02  | 6.06E-01 | 3.51E-01 | 7.26E-01 | 2.72E-02 | 1.32E-01 | 9.48E-01 |
| 309.96948 | 25.76  | 14.26 | 14.94 | 14.28 | 14.36 | 6.99E-03  | 1.03E-02 | 1.00E+00 | 9.71E-01 | 1.62E-02 | 5.60E-02 | 9.85E-01 |
| 310.00143 | 20.76  | 13.66 | 15.42 | 13.45 | 13.97 | 2.35E-05  | 2.01E-04 | 9.57E-01 | 8.80E-01 | 3.55E-05 | 6.41E-03 | 6.22E-01 |
| 310.02478 | 18.29  | 17.32 | 18.82 | 18.26 | 17.83 | 5.33E-06  | 2.00E-06 | 5.51E-03 | 3.07E-01 | 2.22E-01 | 6.15E-03 | 4.67E-01 |

|           |        |       |       |       |       |          |          |          |          |          |          |          |
|-----------|--------|-------|-------|-------|-------|----------|----------|----------|----------|----------|----------|----------|
| 310.0822  | 49.7   | 14.05 | 17.89 | 12.02 | 12.79 | 3.28E-79 | 5.11E-15 | 4.04E-14 | 1.54E-08 | 5.11E-15 | 5.11E-15 | 1.53E-03 |
| 310.09151 | 30.59  | 20.97 | 23.11 | 21.97 | 21.56 | 2.24E-31 | 5.11E-15 | 7.69E-10 | 9.05E-04 | 1.57E-11 | 4.43E-14 | 4.57E-02 |
| 310.11095 | 29.23  | 14.56 | 16.40 | 13.08 | 13.55 | 1.65E-86 | 5.11E-15 | 5.11E-15 | 4.31E-14 | 5.11E-15 | 5.11E-15 | 9.10E-05 |
| 310.11521 | 26.13  | 16.22 | 14.51 | 15.10 | 15.51 | 1.98E-08 | 5.16E-09 | 1.99E-04 | 4.79E-02 | 1.33E-01 | 2.69E-03 | 4.69E-01 |
| 310.12652 | 25.03  | 12.05 | 15.49 | 12.00 | 12.85 | 4.81E-06 | 1.94E-05 | 1.00E+00 | 7.06E-01 | 2.11E-05 | 3.34E-03 | 6.72E-01 |
| 310.15167 | 27.9   | 16.11 | 15.42 | 14.37 | 14.39 | 1.69E-06 | 2.25E-01 | 1.27E-05 | 3.78E-05 | 2.45E-02 | 3.89E-02 | 1.00E+00 |
| 310.17792 | 143.71 | 16.55 | 16.22 | 15.51 | 16.98 | 9.20E-07 | 5.31E-01 | 2.39E-04 | 3.56E-01 | 3.35E-02 | 2.24E-02 | 4.24E-07 |
| 310.23921 | 116.85 | 15.74 | 12.26 | 13.13 | 14.08 | 1.26E-30 | 5.11E-15 | 4.04E-14 | 7.54E-09 | 5.32E-03 | 8.15E-10 | 2.77E-03 |
| 310.28357 | 300.42 | 17.21 | 18.98 | 19.99 | 18.35 | 1.89E-07 | 1.12E-03 | 4.34E-08 | 8.51E-02 | 1.46E-01 | 5.77E-01 | 4.86E-03 |
| 310.79452 | 91.12  | 15.95 | 16.79 | 16.99 | 16.91 | 2.06E-17 | 1.16E-10 | 4.45E-14 | 1.01E-12 | 3.56E-01 | 7.82E-01 | 9.14E-01 |
| 310.85845 | 60.34  | 15.36 | 12.53 | 15.52 | 15.32 | 1.71E-27 | 2.69E-14 | 9.28E-01 | 9.99E-01 | 1.71E-14 | 4.04E-14 | 8.90E-01 |
| 310.87284 | 42.61  | 17.60 | 17.03 | 17.53 | 16.80 | 7.44E-09 | 2.38E-04 | 9.59E-01 | 1.98E-07 | 2.06E-03 | 3.79E-01 | 3.48E-06 |
| 310.88372 | 45.29  | 9.84  | 13.28 | 13.18 | 10.75 | 3.60E-09 | 3.16E-07 | 5.61E-07 | 4.62E-01 | 9.98E-01 | 6.79E-04 | 1.09E-03 |
| 310.90051 | 48.69  | 20.47 | 19.67 | 20.07 | 20.65 | 1.25E-05 | 3.70E-04 | 1.68E-01 | 7.99E-01 | 1.95E-01 | 2.17E-05 | 2.47E-02 |
| 310.95679 | 44.89  | 13.86 | 13.91 | 14.61 | 13.89 | 7.15E-02 | 9.98E-01 | 9.14E-02 | 9.99E-01 | 1.51E-01 | 1.00E+00 | 1.54E-01 |
| 310.97954 | 22.63  | 13.64 | 12.13 | 14.56 | 15.42 | 7.85E-09 | 1.17E-02 | 2.28E-01 | 2.39E-03 | 1.17E-05 | 5.05E-09 | 3.24E-01 |
| 311.02826 | 18.06  | 17.79 | 19.87 | 18.85 | 17.88 | 1.02E-08 | 4.88E-08 | 1.20E-02 | 9.94E-01 | 2.28E-02 | 8.61E-07 | 3.96E-02 |
| 311.05057 | 31.07  | 16.78 | 15.86 | 15.80 | 16.23 | 4.56E-05 | 3.50E-04 | 9.57E-05 | 8.29E-02 | 9.93E-01 | 4.05E-01 | 2.60E-01 |
| 311.06926 | 27.97  | 16.58 | 15.04 | 15.39 | 15.18 | 1.18E-14 | 4.29E-13 | 1.21E-08 | 9.55E-11 | 2.85E-01 | 9.04E-01 | 7.20E-01 |
| 311.08494 | 62.56  | 8.85  | 22.24 | 10.34 | 9.24  | 1.78E-83 | 5.11E-15 | 7.36E-03 | 8.44E-01 | 5.11E-15 | 5.11E-15 | 1.09E-01 |
| 311.09378 | 41.64  | 12.79 | 18.93 | 14.06 | 13.38 | 2.89E-45 | 5.11E-15 | 2.05E-03 | 3.73E-01 | 5.11E-15 | 5.11E-15 | 2.55E-01 |
| 311.09988 | 242.07 | 17.95 | 17.73 | 17.82 | 17.30 | 1.34E-01 | 8.55E-01 | 9.62E-01 | 9.83E-02 | 9.90E-01 | 4.44E-01 | 2.73E-01 |
| 311.15139 | 161.39 | 15.27 | 14.60 | 14.51 | 14.51 | 2.03E-06 | 2.51E-04 | 1.96E-05 | 3.74E-05 | 9.48E-01 | 9.48E-01 | 1.00E+00 |
| 311.16365 | 198.75 | 16.41 | 14.97 | 15.67 | 15.56 | 1.77E-04 | 4.40E-05 | 8.00E-02 | 4.12E-02 | 1.36E-01 | 2.95E-01 | 9.87E-01 |
| 311.16895 | 288.22 | 19.33 | 20.53 | 21.06 | 20.09 | 9.44E-48 | 5.11E-15 | 5.11E-15 | 1.96E-13 | 2.16E-07 | 4.78E-05 | 4.16E-14 |
| 311.16925 | 145.43 | 21.05 | 21.45 | 20.73 | 21.43 | 1.03E-03 | 1.75E-01 | 3.60E-01 | 2.42E-01 | 2.27E-03 | 9.99E-01 | 4.56E-03 |
| 311.17628 | 225.68 | 16.69 | 15.81 | 15.54 | 16.45 | 4.26E-07 | 4.25E-04 | 1.52E-06 | 6.96E-01 | 6.24E-01 | 3.07E-02 | 5.62E-04 |
| 311.18498 | 171.37 | 14.82 | 14.52 | 14.22 | 14.22 | 5.28E-03 | 4.03E-01 | 9.84E-03 | 1.31E-02 | 4.19E-01 | 4.39E-01 | 1.00E+00 |
| 311.20213 | 219.82 | 14.28 | 13.67 | 15.47 | 12.05 | 4.20E-24 | 1.11E-01 | 9.41E-05 | 4.40E-13 | 3.22E-09 | 2.94E-07 | 7.33E-15 |
| 311.22348 | 237.24 | 19.42 | 18.55 | 18.74 | 18.61 | 1.27E-09 | 1.22E-08 | 1.15E-05 | 2.80E-07 | 5.12E-01 | 9.74E-01 | 7.94E-01 |
| 311.25963 | 192.2  | 17.10 | 16.05 | 16.40 | 16.45 | 1.78E-10 | 4.23E-11 | 1.25E-05 | 1.03E-04 | 8.53E-02 | 4.86E-02 | 9.90E-01 |
| 311.28691 | 297.82 | 15.41 | 14.90 | 16.30 | 15.04 | 4.18E-06 | 2.50E-01 | 6.22E-03 | 5.57E-01 | 6.30E-06 | 9.62E-01 | 9.57E-05 |
| 311.29586 | 277.66 | 17.54 | 17.33 | 17.52 | 17.37 | 4.38E-02 | 8.34E-02 | 9.96E-01 | 2.25E-01 | 1.49E-01 | 9.79E-01 | 3.43E-01 |
| 311.90204 | 57.36  | 15.64 | 15.36 | 15.34 | 15.39 | 4.25E-01 | 5.28E-01 | 4.48E-01 | 6.48E-01 | 9.99E-01 | 9.99E-01 | 9.94E-01 |
| 311.95454 | 28.77  | 17.38 | 18.20 | 18.21 | 18.04 | 2.91E-23 | 4.22E-14 | 4.17E-14 | 1.02E-12 | 1.00E+00 | 2.33E-01 | 1.84E-01 |
| 311.97563 | 34.15  | 13.05 | 12.03 | 12.07 | 13.44 | 9.22E-02 | 3.99E-01 | 4.25E-01 | 9.32E-01 | 1.00E+00 | 1.66E-01 | 1.79E-01 |
| 312.01972 | 33.04  | 14.51 | 15.98 | 15.36 | 16.60 | 5.63E-21 | 2.79E-12 | 7.11E-05 | 3.66E-14 | 8.57E-03 | 1.32E-02 | 1.61E-08 |
| 312.02788 | 19.92  | 16.92 | 18.82 | 18.71 | 18.40 | 1.18E-31 | 5.33E-15 | 6.66E-15 | 4.15E-14 | 8.96E-01 | 4.36E-02 | 1.99E-01 |
| 312.08791 | 32.51  | 15.89 | 18.77 | 16.62 | 16.23 | 4.82E-31 | 5.11E-15 | 3.92E-03 | 4.01E-01 | 4.29E-14 | 2.22E-14 | 3.17E-01 |
| 312.09586 | 24.71  | 21.15 | 22.59 | 22.48 | 21.56 | 1.70E-06 | 1.70E-05 | 7.26E-05 | 5.29E-01 | 9.83E-01 | 7.57E-03 | 2.08E-02 |
| 312.17234 | 290.71 | 15.07 | 17.17 | 17.54 | 16.60 | 3.49E-24 | 4.42E-14 | 1.82E-14 | 6.23E-10 | 3.44E-01 | 7.32E-02 | 3.61E-04 |
| 312.1726  | 131.32 | 18.56 | 18.63 | 17.76 | 18.67 | 7.38E-05 | 9.88E-01 | 1.20E-03 | 9.59E-01 | 5.34E-04 | 9.98E-01 | 3.98E-04 |
| 312.22666 | 179.36 | 17.88 | 16.91 | 17.00 | 17.21 | 3.45E-11 | 3.27E-10 | 8.18E-09 | 3.23E-05 | 9.26E-01 | 1.88E-01 | 4.87E-01 |
| 312.23076 | 272.84 | 18.63 | 17.28 | 17.63 | 16.97 | 1.27E-08 | 3.43E-06 | 8.88E-04 | 2.20E-08 | 5.58E-01 | 6.92E-01 | 8.32E-02 |
| 312.25499 | 159.28 | 17.93 | 17.17 | 17.87 | 17.43 | 6.70E-11 | 2.15E-09 | 9.67E-01 | 1.89E-04 | 5.07E-08 | 1.56E-01 | 1.41E-03 |

|           |        |       |       |       |       |           |          |          |          |          |          |          |
|-----------|--------|-------|-------|-------|-------|-----------|----------|----------|----------|----------|----------|----------|
| 312.46454 | 16.78  | 13.25 | 13.70 | 14.85 | 12.78 | 1.14E-08  | 4.80E-01 | 3.82E-06 | 4.61E-01 | 2.42E-03 | 2.98E-02 | 1.00E-08 |
| 312.79203 | 91.89  | 14.97 | 15.25 | 15.48 | 15.51 | 1.25E-03  | 2.34E-01 | 3.80E-03 | 2.68E-03 | 4.46E-01 | 3.51E-01 | 9.96E-01 |
| 312.81023 | 82.16  | 16.33 | 16.68 | 17.12 | 17.01 | 9.02E-15  | 2.02E-03 | 1.13E-13 | 3.59E-10 | 6.57E-05 | 7.00E-03 | 6.91E-01 |
| 312.82311 | 288.15 | 17.45 | 18.25 | 18.07 | 18.59 | 2.09E-14  | 1.73E-08 | 1.75E-05 | 5.18E-14 | 4.95E-01 | 6.34E-02 | 7.58E-04 |
| 312.82353 | 213.94 | 16.35 | 13.40 | 12.39 | 15.28 | 4.14E-23  | 3.93E-13 | 3.04E-14 | 2.57E-02 | 3.70E-02 | 1.34E-05 | 7.64E-12 |
| 312.86504 | 27.48  | 15.34 | 14.78 | 15.18 | 14.84 | 3.02E-01  | 3.47E-01 | 9.67E-01 | 4.75E-01 | 6.42E-01 | 9.98E-01 | 7.64E-01 |
| 312.87019 | 35.93  | 16.18 | 15.79 | 15.31 | 14.97 | 3.34E-12  | 5.92E-02 | 3.37E-07 | 8.01E-12 | 1.64E-02 | 9.63E-06 | 1.71E-01 |
| 312.8777  | 58.96  | 16.46 | 14.87 | 17.35 | 17.31 | 1.38E-38  | 4.31E-14 | 5.52E-07 | 4.93E-06 | 5.11E-15 | 5.11E-15 | 9.94E-01 |
| 312.88582 | 24.1   | 15.77 | 17.29 | 17.67 | 16.96 | 8.12E-28  | 4.40E-14 | 5.33E-15 | 3.73E-12 | 6.46E-02 | 1.77E-01 | 6.98E-05 |
| 312.89556 | 81.51  | 18.05 | 16.14 | 17.79 | 17.52 | 7.55E-23  | 2.64E-14 | 4.36E-01 | 1.67E-02 | 4.41E-14 | 7.02E-12 | 4.40E-01 |
| 312.93786 | 70.95  | 16.84 | 15.06 | 16.69 | 18.11 | 1.16E-34  | 4.30E-14 | 8.40E-01 | 1.54E-09 | 5.51E-14 | 5.11E-15 | 3.31E-11 |
| 312.94884 | 22.37  | 13.60 | 11.62 | 13.25 | 14.54 | 1.21E-09  | 8.64E-06 | 8.08E-01 | 1.06E-01 | 5.26E-04 | 3.02E-10 | 1.23E-02 |
| 312.97404 | 84.38  | 15.38 | 14.40 | 14.03 | 15.25 | 5.27E-07  | 1.72E-03 | 3.94E-06 | 9.65E-01 | 5.16E-01 | 1.49E-02 | 1.04E-04 |
| 313.02212 | 52.73  | 15.34 | 14.88 | 16.80 | 16.92 | 3.49E-23  | 1.06E-01 | 5.58E-11 | 9.03E-12 | 4.26E-14 | 4.27E-14 | 9.48E-01 |
| 313.03147 | 30.87  | 14.86 | 14.82 | 14.70 | 14.32 | 3.60E-01  | 9.99E-01 | 9.54E-01 | 3.42E-01 | 9.82E-01 | 4.39E-01 | 6.62E-01 |
| 313.04535 | 18.29  | 14.94 | 14.52 | 16.28 | 16.26 | 3.87E-08  | 5.76E-01 | 4.01E-04 | 9.06E-04 | 2.80E-06 | 8.63E-06 | 1.00E+00 |
| 313.07887 | 269.59 | 15.57 | 16.74 | 18.32 | 16.16 | 9.94E-14  | 2.70E-03 | 8.35E-14 | 3.04E-01 | 3.25E-05 | 3.46E-01 | 1.46E-08 |
| 313.08563 | 38.16  | 14.65 | 14.27 | 14.28 | 13.21 | 1.69E-02  | 8.28E-01 | 8.31E-01 | 9.45E-03 | 1.00E+00 | 1.08E-01 | 1.00E-01 |
| 313.09333 | 144.21 | 14.93 | 14.45 | 14.72 | 14.80 | 7.17E-03  | 3.37E-03 | 4.12E-01 | 8.11E-01 | 2.27E-01 | 7.35E-02 | 9.34E-01 |
| 313.09339 | 26.55  | 14.49 | 15.72 | 15.80 | 15.18 | 6.46E-04  | 2.86E-03 | 1.11E-03 | 2.23E-01 | 9.96E-01 | 4.54E-01 | 3.23E-01 |
| 313.09932 | 23.26  | 18.47 | 19.22 | 19.20 | 18.40 | 2.19E-03  | 3.07E-02 | 3.73E-02 | 9.94E-01 | 1.00E+00 | 2.29E-02 | 2.78E-02 |
| 313.11411 | 27.67  | 13.49 | 13.39 | 13.44 | 14.32 | 3.72E-02  | 9.91E-01 | 9.99E-01 | 8.68E-02 | 9.99E-01 | 5.10E-02 | 7.04E-02 |
| 313.12043 | 25.07  | 15.90 | 17.49 | 17.59 | 17.67 | 3.45E-15  | 1.37E-10 | 8.17E-12 | 4.34E-12 | 9.79E-01 | 8.83E-01 | 9.84E-01 |
| 313.12988 | 154.34 | 15.30 | 14.89 | 15.15 | 14.93 | 9.34E-03  | 1.36E-02 | 6.90E-01 | 4.07E-02 | 2.22E-01 | 9.91E-01 | 3.95E-01 |
| 313.13012 | 28.18  | 16.06 | 16.67 | 16.81 | 16.16 | 5.37E-08  | 1.17E-04 | 8.38E-07 | 8.73E-01 | 7.43E-01 | 4.49E-03 | 9.48E-05 |
| 313.16543 | 143.73 | 17.03 | 16.91 | 16.40 | 17.00 | 1.51E-03  | 8.98E-01 | 2.08E-03 | 9.98E-01 | 2.61E-02 | 9.59E-01 | 6.94E-03 |
| 313.17596 | 144.46 | 14.71 | 14.30 | 13.04 | 14.49 | 2.25E-05  | 6.63E-01 | 2.18E-05 | 9.36E-01 | 3.26E-03 | 9.56E-01 | 6.79E-04 |
| 313.19272 | 251.02 | 17.11 | 16.83 | 16.79 | 17.35 | 1.12E-02  | 4.05E-01 | 2.76E-01 | 5.57E-01 | 9.96E-01 | 3.23E-02 | 1.62E-02 |
| 313.20264 | 159.93 | 16.19 | 15.45 | 15.70 | 15.69 | 6.36E-07  | 2.08E-07 | 1.11E-03 | 1.36E-03 | 2.20E-01 | 2.82E-01 | 1.00E+00 |
| 313.2176  | 208.18 | 16.45 | 14.99 | 16.33 | 15.75 | 3.03E-16  | 4.87E-14 | 9.01E-01 | 4.33E-04 | 1.15E-12 | 1.43E-04 | 6.06E-03 |
| 313.23884 | 257.22 | 19.56 | 18.78 | 18.85 | 18.83 | 5.76E-10  | 2.42E-08 | 2.63E-07 | 3.51E-07 | 9.59E-01 | 9.86E-01 | 9.99E-01 |
| 313.25838 | 167.2  | 15.48 | 13.88 | 14.86 | 14.54 | 1.93E-22  | 1.49E-14 | 7.39E-05 | 2.21E-09 | 2.61E-10 | 5.88E-05 | 1.24E-01 |
| 313.27531 | 189.32 | 15.91 | 15.03 | 14.55 | 15.00 | 1.35E-19  | 9.78E-10 | 4.09E-14 | 6.13E-10 | 2.42E-03 | 9.95E-01 | 7.51E-03 |
| 313.93393 | 35.87  | 16.01 | 16.30 | 16.13 | 15.58 | 4.40E-05  | 1.86E-01 | 8.23E-01 | 1.85E-02 | 6.69E-01 | 1.93E-05 | 1.49E-03 |
| 313.94328 | 40.41  | 18.34 | 19.91 | 20.09 | 19.35 | 2.10E-34  | 5.33E-15 | 5.11E-15 | 1.23E-12 | 5.15E-01 | 1.80E-04 | 3.19E-07 |
| 314.01944 | 29.63  | 17.98 | 19.06 | 18.57 | 19.35 | 1.30E-13  | 3.90E-09 | 2.73E-03 | 5.53E-13 | 2.14E-02 | 3.65E-01 | 7.43E-05 |
| 314.02924 | 21     | 14.41 | 15.80 | 16.11 | 16.00 | 1.78E-21  | 3.14E-13 | 4.51E-14 | 4.29E-14 | 2.84E-01 | 6.79E-01 | 9.28E-01 |
| 314.04101 | 34.57  | 15.82 | 15.04 | 14.95 | 15.24 | 2.01E-05  | 2.55E-04 | 3.44E-05 | 1.55E-02 | 9.74E-01 | 7.34E-01 | 4.70E-01 |
| 314.07542 | 21.11  | 14.29 | 15.58 | 15.37 | 15.27 | 1.67E-04  | 2.07E-04 | 2.60E-03 | 1.09E-02 | 9.02E-01 | 7.69E-01 | 9.90E-01 |
| 314.10121 | 26.1   | 15.46 | 14.00 | 15.44 | 14.98 | 4.46E-03  | 6.15E-03 | 1.00E+00 | 7.25E-01 | 8.82E-03 | 1.51E-01 | 7.62E-01 |
| 314.12038 | 23.98  | 16.85 | 16.24 | 16.41 | 16.86 | 6.99E-03  | 1.93E-02 | 1.48E-01 | 1.00E+00 | 8.49E-01 | 2.92E-02 | 1.84E-01 |
| 314.17298 | 28.08  | 9.18  | 15.97 | 8.48  | 8.97  | 4.26E-121 | 5.11E-15 | 1.66E-04 | 6.03E-01 | 5.11E-15 | 5.11E-15 | 2.57E-02 |
| 314.21662 | 176.38 | 14.25 | 14.90 | 15.27 | 13.81 | 1.69E-07  | 4.86E-02 | 3.05E-04 | 3.05E-01 | 4.65E-01 | 2.68E-04 | 3.54E-07 |
| 314.24287 | 161.84 | 16.24 | 15.30 | 15.49 | 15.81 | 1.23E-03  | 1.00E-03 | 1.27E-02 | 3.26E-01 | 8.74E-01 | 2.05E-01 | 6.00E-01 |
| 314.24603 | 299.15 | 15.77 | 15.91 | 16.64 | 15.59 | 1.54E-02  | 9.78E-01 | 4.59E-02 | 9.47E-01 | 1.40E-01 | 7.97E-01 | 1.49E-02 |

|           |        |       |       |       |       |           |          |          |          |          |          |          |
|-----------|--------|-------|-------|-------|-------|-----------|----------|----------|----------|----------|----------|----------|
| 314.80746 | 86.66  | 15.04 | 15.16 | 15.60 | 15.50 | 5.20E-03  | 9.00E-01 | 8.64E-03 | 5.70E-02 | 7.55E-02 | 2.70E-01 | 9.50E-01 |
| 314.86195 | 30.89  | 15.31 | 14.11 | 15.02 | 14.27 | 1.31E-04  | 4.50E-04 | 7.74E-01 | 4.54E-03 | 1.50E-02 | 9.55E-01 | 7.61E-02 |
| 314.87572 | 77.06  | 15.26 | 14.89 | 15.77 | 15.95 | 4.01E-11  | 6.07E-02 | 2.98E-03 | 5.54E-05 | 9.26E-08 | 6.00E-10 | 6.77E-01 |
| 314.88426 | 30.23  | 14.23 | 15.48 | 15.49 | 14.71 | 4.30E-05  | 3.20E-04 | 2.47E-04 | 4.10E-01 | 1.00E+00 | 8.14E-02 | 7.32E-02 |
| 314.8923  | 118.2  | 14.75 | 12.21 | 13.51 | 14.37 | 3.21E-17  | 4.14E-14 | 4.25E-05 | 5.14E-01 | 2.98E-05 | 9.26E-12 | 1.58E-02 |
| 314.90649 | 19.12  | 16.64 | 16.72 | 16.89 | 16.99 | 1.56E-01  | 9.63E-01 | 4.10E-01 | 1.62E-01 | 7.31E-01 | 3.99E-01 | 9.40E-01 |
| 314.92757 | 34.76  | 16.04 | 15.99 | 16.25 | 16.07 | 3.76E-01  | 9.84E-01 | 5.23E-01 | 9.97E-01 | 3.39E-01 | 9.52E-01 | 6.90E-01 |
| 314.96907 | 162.5  | 14.78 | 11.36 | 11.26 | 14.14 | 8.66E-24  | 4.17E-14 | 4.24E-14 | 3.22E-01 | 9.93E-01 | 6.47E-11 | 9.04E-12 |
| 314.96934 | 34.83  | 16.71 | 18.13 | 18.13 | 17.78 | 9.48E-21  | 4.17E-14 | 4.27E-14 | 2.38E-10 | 1.00E+00 | 1.20E-01 | 1.16E-01 |
| 315.02544 | 27.51  | 17.78 | 18.43 | 18.08 | 18.03 | 1.29E-05  | 2.26E-06 | 7.74E-02 | 2.19E-01 | 2.92E-02 | 1.21E-02 | 9.79E-01 |
| 315.04341 | 34.05  | 18.89 | 18.49 | 19.01 | 18.33 | 3.93E-02  | 3.97E-01 | 9.68E-01 | 1.53E-01 | 1.97E-01 | 9.43E-01 | 6.23E-02 |
| 315.09611 | 40.89  | 15.17 | 21.32 | 15.13 | 14.61 | 5.82E-72  | 5.11E-15 | 9.99E-01 | 1.74E-01 | 5.11E-15 | 5.11E-15 | 2.38E-01 |
| 315.14418 | 21.68  | 12.96 | 14.87 | 15.44 | 13.32 | 5.05E-10  | 1.83E-05 | 1.07E-08 | 8.16E-01 | 4.98E-01 | 1.63E-03 | 4.66E-06 |
| 315.14517 | 156.82 | 14.18 | 14.62 | 15.08 | 14.24 | 3.68E-04  | 2.09E-01 | 4.73E-04 | 9.94E-01 | 1.98E-01 | 3.83E-01 | 2.70E-03 |
| 315.1815  | 285.62 | 14.25 | 17.05 | 17.30 | 16.62 | 2.24E-33  | 6.00E-15 | 5.11E-15 | 4.09E-14 | 6.97E-01 | 2.75E-01 | 2.25E-02 |
| 315.18154 | 169.55 | 16.91 | 17.00 | 17.70 | 16.48 | 4.70E-15  | 9.02E-01 | 2.44E-08 | 7.58E-03 | 1.89E-06 | 1.07E-03 | 4.24E-14 |
| 315.19733 | 26.7   | 19.14 | 17.51 | 18.62 | 19.94 | 2.37E-08  | 6.67E-05 | 4.71E-01 | 1.40E-01 | 1.59E-02 | 7.13E-09 | 3.32E-03 |
| 315.21058 | 239.83 | 19.39 | 18.13 | 18.34 | 18.86 | 1.19E-30  | 5.11E-15 | 2.69E-14 | 1.22E-06 | 1.55E-01 | 7.58E-11 | 3.32E-06 |
| 315.21903 | 175.04 | 16.29 | 16.91 | 16.83 | 15.97 | 3.80E-12  | 1.64E-05 | 1.98E-04 | 8.45E-02 | 9.30E-01 | 3.81E-10 | 7.70E-09 |
| 315.23334 | 228.2  | 22.78 | 22.13 | 22.34 | 22.03 | 3.07E-10  | 7.47E-08 | 4.14E-04 | 1.66E-09 | 2.45E-01 | 8.41E-01 | 4.18E-02 |
| 315.25427 | 273.59 | 18.95 | 18.66 | 18.81 | 19.09 | 3.28E-03  | 5.60E-02 | 6.12E-01 | 6.06E-01 | 5.61E-01 | 2.11E-03 | 8.58E-02 |
| 315.70235 | 233.1  | 15.50 | 13.66 | 14.32 | 15.92 | 6.76E-10  | 9.79E-07 | 3.17E-03 | 6.43E-01 | 2.28E-01 | 1.12E-08 | 7.50E-05 |
| 315.94121 | 34.41  | 13.81 | 14.68 | 15.00 | 14.03 | 3.44E-07  | 7.67E-04 | 1.14E-06 | 7.76E-01 | 4.93E-01 | 3.18E-02 | 2.66E-04 |
| 315.94922 | 35.96  | 17.88 | 18.15 | 18.32 | 17.51 | 5.64E-05  | 3.91E-01 | 4.55E-02 | 1.33E-01 | 7.50E-01 | 2.07E-03 | 3.81E-05 |
| 315.98833 | 24.27  | 16.24 | 16.09 | 16.37 | 17.01 | 5.58E-04  | 9.06E-01 | 9.30E-01 | 3.32E-03 | 5.96E-01 | 4.45E-04 | 2.49E-02 |
| 316.01481 | 44.08  | 10.06 | 11.50 | 12.56 | 14.03 | 3.06E-09  | 6.32E-02 | 1.08E-04 | 1.05E-09 | 2.74E-01 | 2.78E-04 | 7.56E-02 |
| 316.03986 | 20.84  | 19.14 | 20.30 | 20.28 | 20.29 | 2.80E-28  | 2.49E-14 | 2.93E-14 | 3.49E-14 | 9.95E-01 | 9.99E-01 | 9.99E-01 |
| 316.08125 | 19.98  | 15.10 | 16.58 | 16.57 | 16.73 | 8.78E-18  | 8.10E-13 | 6.30E-13 | 5.95E-14 | 1.00E+00 | 8.55E-01 | 8.38E-01 |
| 316.09845 | 53.88  | 14.58 | 17.91 | 12.87 | 13.44 | 5.57E-113 | 5.11E-15 | 5.11E-15 | 4.27E-14 | 5.11E-15 | 5.11E-15 | 1.33E-05 |
| 316.10339 | 172.17 | 10.79 | 6.38  | 16.35 | 9.31  | 6.22E-34  | 7.09E-10 | 5.04E-14 | 1.23E-01 | 5.11E-15 | 1.75E-04 | 3.93E-14 |
| 316.1175  | 28.77  | 16.03 | 15.53 | 15.29 | 14.98 | 2.50E-03  | 2.65E-01 | 3.44E-02 | 1.41E-03 | 8.24E-01 | 2.33E-01 | 7.09E-01 |
| 316.14648 | 25.31  | 17.81 | 18.26 | 18.14 | 18.00 | 3.24E-02  | 2.23E-02 | 1.51E-01 | 6.11E-01 | 8.68E-01 | 4.15E-01 | 8.53E-01 |
| 316.17162 | 26.86  | 19.13 | 18.02 | 18.15 | 17.78 | 3.80E-15  | 1.52E-10 | 1.31E-08 | 9.10E-14 | 8.40E-01 | 4.65E-01 | 1.06E-01 |
| 316.20065 | 25.51  | 16.67 | 14.56 | 15.56 | 17.27 | 3.62E-12  | 3.37E-08 | 7.71E-03 | 3.44E-01 | 2.76E-02 | 2.03E-11 | 2.78E-05 |
| 316.2372  | 233.61 | 20.42 | 19.70 | 19.94 | 19.57 | 3.12E-12  | 5.51E-09 | 1.10E-04 | 1.49E-11 | 1.82E-01 | 6.57E-01 | 1.03E-02 |
| 316.24962 | 215.41 | 13.61 | 12.67 | 11.96 | 14.97 | 1.00E-15  | 1.97E-02 | 3.43E-06 | 2.99E-04 | 1.46E-01 | 6.11E-10 | 4.44E-14 |
| 316.60522 | 171.97 | 13.38 | 11.69 | 13.84 | 12.13 | 4.44E-62  | 5.11E-15 | 3.02E-05 | 5.77E-15 | 5.11E-15 | 1.56E-04 | 5.11E-15 |
| 316.85476 | 78.47  | 15.17 | 15.38 | 16.26 | 15.99 | 5.06E-16  | 3.84E-01 | 7.15E-14 | 2.42E-08 | 1.53E-09 | 7.99E-05 | 1.99E-01 |
| 316.86454 | 86.08  | 15.34 | 13.78 | 14.86 | 15.50 | 2.75E-12  | 2.87E-10 | 1.39E-01 | 8.99E-01 | 2.79E-05 | 4.51E-11 | 3.52E-02 |
| 316.88938 | 143.92 | 16.92 | 15.92 | 15.35 | 17.09 | 5.58E-15  | 4.20E-05 | 2.66E-11 | 8.56E-01 | 4.80E-02 | 3.67E-06 | 2.46E-12 |
| 316.90125 | 23.95  | 14.52 | 12.23 | 12.60 | 11.55 | 6.65E-05  | 2.30E-03 | 1.39E-02 | 5.40E-05 | 9.43E-01 | 7.40E-01 | 3.96E-01 |
| 316.90658 | 32.97  | 16.96 | 17.69 | 18.03 | 17.83 | 5.53E-13  | 1.20E-06 | 1.08E-12 | 1.56E-08 | 8.65E-02 | 7.76E-01 | 5.34E-01 |
| 316.90749 | 194.19 | 15.27 | 15.97 | 15.95 | 15.69 | 8.10E-14  | 7.01E-12 | 1.14E-11 | 8.87E-05 | 9.99E-01 | 2.46E-02 | 3.43E-02 |
| 316.92736 | 153.75 | 16.09 | 16.17 | 15.72 | 16.50 | 9.91E-04  | 9.73E-01 | 1.63E-01 | 1.24E-01 | 7.20E-02 | 3.07E-01 | 2.92E-04 |
| 316.92767 | 60.19  | 19.49 | 18.36 | 18.00 | 18.28 | 2.32E-19  | 1.59E-11 | 4.31E-14 | 2.78E-12 | 9.74E-02 | 9.67E-01 | 2.80E-01 |



|           |        |       |       |       |       |          |          |          |          |          |          |          |
|-----------|--------|-------|-------|-------|-------|----------|----------|----------|----------|----------|----------|----------|
| 316.94846 | 37.82  | 21.81 | 23.94 | 23.88 | 23.82 | 2.67E-29 | 1.44E-14 | 1.87E-14 | 3.84E-14 | 9.91E-01 | 9.30E-01 | 9.88E-01 |
| 316.98322 | 30.1   | 18.04 | 16.47 | 16.26 | 17.42 | 5.92E-16 | 2.83E-11 | 8.66E-14 | 2.83E-02 | 7.77E-01 | 2.15E-04 | 3.04E-06 |
| 317.03715 | 161.17 | 17.22 | 14.89 | 15.25 | 14.66 | 1.58E-24 | 4.33E-14 | 5.22E-14 | 3.44E-14 | 4.49E-01 | 7.79E-01 | 7.93E-02 |
| 317.08219 | 167.49 | 15.19 | 14.20 | 14.23 | 14.62 | 5.60E-23 | 3.96E-14 | 4.14E-14 | 1.24E-07 | 9.88E-01 | 3.15E-04 | 9.32E-04 |
| 317.10247 | 164.01 | 9.97  | 6.16  | 16.38 | 5.75  | 1.82E-55 | 3.04E-11 | 5.77E-15 | 9.27E-13 | 5.11E-15 | 8.79E-01 | 5.11E-15 |
| 317.12746 | 289.15 | 17.35 | 14.13 | 12.90 | 14.57 | 1.23E-19 | 1.29E-11 | 4.11E-14 | 1.20E-08 | 3.10E-02 | 7.66E-01 | 1.68E-03 |
| 317.13044 | 26.5   | 14.27 | 14.60 | 14.66 | 14.58 | 3.26E-01 | 4.73E-01 | 3.28E-01 | 5.56E-01 | 9.96E-01 | 1.00E+00 | 9.89E-01 |
| 317.13646 | 199.24 | 16.23 | 13.65 | 14.35 | 14.29 | 6.32E-10 | 6.66E-10 | 7.25E-06 | 7.48E-06 | 2.78E-01 | 3.95E-01 | 9.98E-01 |
| 317.16108 | 157.75 | 15.03 | 14.26 | 14.11 | 14.22 | 2.50E-06 | 2.68E-04 | 7.30E-06 | 1.97E-04 | 8.68E-01 | 9.98E-01 | 9.40E-01 |
| 317.21266 | 186.39 | 18.38 | 16.79 | 16.33 | 16.47 | 5.66E-22 | 1.04E-12 | 4.31E-14 | 4.37E-14 | 1.23E-01 | 4.42E-01 | 9.15E-01 |
| 317.22563 | 269.63 | 20.97 | 19.95 | 19.94 | 20.67 | 1.95E-17 | 2.99E-13 | 1.50E-13 | 9.30E-02 | 1.00E+00 | 1.08E-06 | 6.53E-07 |
| 317.2397  | 235.04 | 16.03 | 15.03 | 15.12 | 13.88 | 1.59E-14 | 1.56E-04 | 6.60E-04 | 4.33E-14 | 9.80E-01 | 2.88E-05 | 4.19E-06 |
| 317.24904 | 252.79 | 21.01 | 19.85 | 20.44 | 20.39 | 2.94E-19 | 3.66E-14 | 1.90E-06 | 4.65E-07 | 1.69E-06 | 3.10E-05 | 9.68E-01 |
| 317.60423 | 164.46 | 13.42 | 11.73 | 14.08 | 12.18 | 1.26E-70 | 5.11E-15 | 8.97E-11 | 5.11E-15 | 5.11E-15 | 3.57E-05 | 5.11E-15 |
| 317.8997  | 22.47  | 17.32 | 15.76 | 15.93 | 16.37 | 6.58E-06 | 1.22E-05 | 1.04E-04 | 2.20E-02 | 9.54E-01 | 2.69E-01 | 5.51E-01 |
| 317.93037 | 34.51  | 14.16 | 15.42 | 15.33 | 15.80 | 8.09E-09 | 1.03E-05 | 3.97E-05 | 1.29E-08 | 9.87E-01 | 4.91E-01 | 2.97E-01 |
| 317.94161 | 30.35  | 16.92 | 17.41 | 17.53 | 16.99 | 2.55E-04 | 1.59E-02 | 1.02E-03 | 9.80E-01 | 8.70E-01 | 6.91E-02 | 7.80E-03 |
| 317.95182 | 38.32  | 17.38 | 19.52 | 19.50 | 19.42 | 1.64E-31 | 7.33E-15 | 7.55E-15 | 2.33E-14 | 9.99E-01 | 9.44E-01 | 9.74E-01 |
| 317.98015 | 29.49  | 14.08 | 14.78 | 14.77 | 14.36 | 1.58E-02 | 3.20E-02 | 3.17E-02 | 7.05E-01 | 1.00E+00 | 4.00E-01 | 4.05E-01 |
| 318.00453 | 25.89  | 15.06 | 15.32 | 15.48 | 15.69 | 1.97E-01 | 8.05E-01 | 4.71E-01 | 1.51E-01 | 9.53E-01 | 6.24E-01 | 8.95E-01 |
| 318.03374 | 30.26  | 13.68 | 16.23 | 16.52 | 15.32 | 2.15E-42 | 5.11E-15 | 5.11E-15 | 4.32E-14 | 3.48E-01 | 1.04E-05 | 2.13E-09 |
| 318.06199 | 21.96  | 17.92 | 18.06 | 18.53 | 18.44 | 2.24E-04 | 7.90E-01 | 5.63E-04 | 7.87E-03 | 1.87E-02 | 1.12E-01 | 9.33E-01 |
| 318.12248 | 290.09 | 16.29 | 11.59 | 11.37 | 12.51 | 1.71E-43 | 5.11E-15 | 5.11E-15 | 7.77E-15 | 8.98E-01 | 2.42E-02 | 2.56E-03 |
| 318.15847 | 286.11 | 13.20 | 17.50 | 15.03 | 17.70 | 2.35E-26 | 3.35E-14 | 4.15E-05 | 2.86E-14 | 3.87E-08 | 9.65E-01 | 6.54E-09 |
| 318.21601 | 170.55 | 15.18 | 12.98 | 12.50 | 12.44 | 2.35E-13 | 7.80E-08 | 4.15E-11 | 6.63E-11 | 5.95E-01 | 5.15E-01 | 9.98E-01 |
| 318.22917 | 265.06 | 18.18 | 16.50 | 16.79 | 17.85 | 6.07E-07 | 5.27E-06 | 1.96E-04 | 7.66E-01 | 8.32E-01 | 8.81E-04 | 1.33E-02 |
| 318.25244 | 247.65 | 18.60 | 17.19 | 17.90 | 17.96 | 1.26E-24 | 5.77E-15 | 1.42E-08 | 5.83E-07 | 2.41E-08 | 5.13E-09 | 9.62E-01 |
| 318.8313  | 22.11  | 13.46 | 12.96 | 13.20 | 13.87 | 1.75E-01 | 5.93E-01 | 9.09E-01 | 7.53E-01 | 9.38E-01 | 1.39E-01 | 3.76E-01 |
| 318.83877 | 133.74 | 15.27 | 15.38 | 15.37 | 16.01 | 4.70E-03 | 9.51E-01 | 9.69E-01 | 4.42E-03 | 1.00E+00 | 2.81E-02 | 2.10E-02 |
| 318.8649  | 82.81  | 18.08 | 18.04 | 18.24 | 18.10 | 1.80E-01 | 9.80E-01 | 2.95E-01 | 9.92E-01 | 1.60E-01 | 9.18E-01 | 5.08E-01 |
| 318.88582 | 54.42  | 23.11 | 22.67 | 23.58 | 23.20 | 1.31E-10 | 1.74E-03 | 4.93E-04 | 8.81E-01 | 1.05E-11 | 2.29E-04 | 1.30E-02 |
| 318.90481 | 88.33  | 14.26 | 14.53 | 14.67 | 14.90 | 8.60E-03 | 4.57E-01 | 1.16E-01 | 4.26E-03 | 8.84E-01 | 2.21E-01 | 6.11E-01 |
| 318.90507 | 196.93 | 15.61 | 15.88 | 16.15 | 15.82 | 2.65E-14 | 9.92E-05 | 4.31E-14 | 5.31E-03 | 1.49E-04 | 7.96E-01 | 3.95E-06 |
| 318.9287  | 25.29  | 12.83 | 13.74 | 13.37 | 13.25 | 7.38E-02 | 4.16E-02 | 3.93E-01 | 6.35E-01 | 7.06E-01 | 5.22E-01 | 9.88E-01 |
| 318.94315 | 37.84  | 19.58 | 19.93 | 19.89 | 19.96 | 6.09E-04 | 3.66E-03 | 1.02E-02 | 1.65E-03 | 9.87E-01 | 9.90E-01 | 9.21E-01 |
| 318.95257 | 43.78  | 15.75 | 17.56 | 17.51 | 17.49 | 2.78E-26 | 3.49E-14 | 3.92E-14 | 4.33E-14 | 9.92E-01 | 9.82E-01 | 1.00E+00 |
| 318.98043 | 26.37  | 16.37 | 16.60 | 16.28 | 16.37 | 2.25E-01 | 4.32E-01 | 9.43E-01 | 1.00E+00 | 1.81E-01 | 4.95E-01 | 9.45E-01 |
| 318.99324 | 31.27  | 15.19 | 15.00 | 14.64 | 14.81 | 1.10E-01 | 8.44E-01 | 8.27E-02 | 4.01E-01 | 4.32E-01 | 8.79E-01 | 8.87E-01 |
| 319.0455  | 32.17  | 16.71 | 20.51 | 18.22 | 17.98 | 1.70E-48 | 5.11E-15 | 5.90E-13 | 3.89E-09 | 1.04E-14 | 5.33E-15 | 6.29E-01 |
| 319.07905 | 26.63  | 15.23 | 14.94 | 14.88 | 15.23 | 4.06E-01 | 6.90E-01 | 5.24E-01 | 1.00E+00 | 9.95E-01 | 7.17E-01 | 5.61E-01 |
| 319.14286 | 290.02 | 16.87 | 13.97 | 12.92 | 13.66 | 1.18E-15 | 7.72E-09 | 4.75E-14 | 4.54E-10 | 1.14E-01 | 9.16E-01 | 4.16E-01 |
| 319.18932 | 185.56 | 16.27 | 13.26 | 13.45 | 14.52 | 3.64E-25 | 2.53E-14 | 3.93E-14 | 9.72E-09 | 8.95E-01 | 9.46E-05 | 1.23E-03 |
| 319.22845 | 108.73 | 25.14 | 23.61 | 24.81 | 25.26 | 1.30E-10 | 5.36E-09 | 5.14E-01 | 9.57E-01 | 9.19E-06 | 2.17E-09 | 2.73E-01 |
| 319.24152 | 297.3  | 15.30 | 14.74 | 15.49 | 15.29 | 9.54E-02 | 2.46E-01 | 9.21E-01 | 1.00E+00 | 7.21E-02 | 3.15E-01 | 9.17E-01 |
| 319.26463 | 267.14 | 18.64 | 17.74 | 18.10 | 18.22 | 2.52E-05 | 5.55E-06 | 1.37E-02 | 1.07E-01 | 1.95E-01 | 5.22E-02 | 9.14E-01 |

|           |        |       |       |       |       |          |          |          |          |          |          |          |
|-----------|--------|-------|-------|-------|-------|----------|----------|----------|----------|----------|----------|----------|
| 319.93822 | 30.56  | 14.99 | 15.33 | 15.38 | 14.86 | 4.11E-02 | 3.35E-01 | 2.24E-01 | 9.31E-01 | 9.97E-01 | 1.31E-01 | 7.91E-02 |
| 319.95266 | 19.69  | 14.04 | 16.19 | 15.89 | 15.55 | 8.67E-13 | 5.43E-12 | 1.94E-09 | 2.60E-06 | 7.25E-01 | 1.47E-01 | 6.71E-01 |
| 319.96228 | 20.28  | 15.93 | 18.70 | 18.63 | 18.45 | 1.03E-36 | 5.11E-15 | 5.11E-15 | 7.33E-15 | 9.87E-01 | 6.49E-01 | 8.31E-01 |
| 319.97725 | 33.38  | 15.91 | 16.03 | 17.11 | 15.03 | 4.61E-08 | 9.84E-01 | 8.03E-04 | 3.06E-02 | 4.30E-03 | 1.40E-02 | 5.85E-09 |
| 320.01459 | 23.86  | 13.06 | 14.25 | 14.58 | 13.63 | 2.51E-05 | 1.80E-03 | 2.34E-05 | 3.16E-01 | 7.44E-01 | 2.78E-01 | 2.86E-02 |
| 320.04969 | 62.38  | 9.00  | 16.15 | 6.95  | 7.71  | 1.53E-49 | 5.11E-15 | 2.06E-04 | 5.35E-02 | 5.11E-15 | 5.11E-15 | 4.48E-01 |
| 320.0596  | 22     | 16.36 | 15.23 | 16.26 | 16.06 | 5.77E-05 | 7.08E-05 | 9.79E-01 | 6.71E-01 | 4.85E-04 | 1.01E-02 | 8.82E-01 |
| 320.07609 | 24.04  | 15.24 | 18.30 | 18.09 | 17.18 | 1.93E-44 | 5.11E-15 | 5.11E-15 | 4.17E-14 | 6.74E-01 | 1.74E-07 | 2.67E-05 |
| 320.23184 | 107.3  | 22.97 | 21.25 | 22.47 | 23.06 | 5.10E-12 | 1.74E-10 | 1.72E-01 | 9.86E-01 | 1.23E-05 | 2.05E-10 | 1.05E-01 |
| 320.2712  | 267.07 | 18.65 | 17.63 | 17.82 | 17.37 | 6.45E-10 | 8.17E-07 | 7.55E-05 | 1.11E-09 | 7.47E-01 | 5.38E-01 | 9.40E-02 |
| 320.82281 | 73.13  | 20.70 | 21.60 | 21.82 | 21.42 | 1.55E-22 | 4.56E-14 | 2.64E-14 | 6.13E-10 | 1.49E-01 | 3.30E-01 | 1.16E-03 |
| 320.83581 | 93.46  | 15.97 | 14.46 | 15.30 | 15.91 | 8.80E-26 | 1.47E-14 | 3.01E-06 | 9.70E-01 | 1.23E-08 | 3.91E-14 | 7.53E-05 |
| 320.84402 | 91.15  | 16.97 | 17.45 | 17.62 | 17.31 | 3.24E-10 | 4.02E-06 | 1.17E-10 | 2.62E-03 | 2.50E-01 | 5.03E-01 | 8.03E-03 |
| 320.86309 | 94.04  | 14.98 | 13.90 | 14.17 | 14.52 | 1.81E-07 | 1.24E-07 | 9.95E-05 | 7.53E-02 | 4.81E-01 | 9.77E-03 | 2.83E-01 |
| 320.88542 | 55.77  | 18.81 | 19.00 | 15.93 | 18.01 | 2.20E-18 | 9.34E-01 | 4.53E-14 | 8.86E-02 | 4.31E-14 | 2.42E-02 | 3.84E-08 |
| 320.90145 | 42.25  | 22.83 | 23.48 | 23.71 | 23.58 | 9.04E-39 | 1.80E-14 | 5.11E-15 | 5.33E-15 | 5.34E-04 | 4.14E-01 | 9.44E-02 |
| 320.91431 | 31.99  | 13.36 | 12.94 | 14.96 | 12.81 | 3.42E-05 | 8.05E-01 | 3.97E-03 | 6.63E-01 | 2.14E-04 | 9.94E-01 | 1.11E-04 |
| 320.93545 | 27.61  | 15.14 | 15.28 | 15.84 | 14.46 | 2.13E-06 | 9.26E-01 | 1.45E-02 | 2.71E-02 | 9.32E-02 | 5.71E-03 | 3.27E-07 |
| 320.94114 | 48.51  | 15.80 | 15.59 | 15.63 | 15.66 | 5.66E-01 | 5.33E-01 | 7.07E-01 | 8.16E-01 | 9.92E-01 | 9.74E-01 | 9.99E-01 |
| 321.04482 | 25.53  | 20.03 | 20.41 | 19.96 | 19.44 | 2.10E-03 | 3.66E-01 | 9.91E-01 | 6.95E-02 | 2.39E-01 | 6.46E-04 | 1.46E-01 |
| 321.11547 | 31.33  | 15.74 | 12.61 | 13.16 | 13.56 | 3.87E-12 | 1.10E-11 | 1.53E-08 | 5.22E-06 | 5.70E-01 | 1.38E-01 | 7.94E-01 |
| 321.12226 | 212.46 | 14.60 | 8.56  | 8.12  | 8.73  | 3.05E-47 | 5.11E-15 | 5.11E-15 | 5.11E-15 | 6.68E-01 | 9.79E-01 | 4.34E-01 |
| 321.13135 | 23.02  | 16.28 | 16.47 | 16.38 | 16.35 | 4.66E-01 | 3.81E-01 | 7.98E-01 | 9.17E-01 | 9.04E-01 | 8.11E-01 | 9.96E-01 |
| 321.20867 | 208.81 | 21.46 | 21.08 | 21.28 | 21.58 | 9.39E-06 | 5.73E-04 | 2.50E-01 | 6.22E-01 | 1.62E-01 | 9.47E-06 | 1.87E-02 |
| 321.21075 | 290.27 | 16.54 | 16.73 | 18.45 | 16.81 | 9.06E-16 | 8.36E-01 | 6.48E-14 | 6.51E-01 | 1.63E-11 | 9.87E-01 | 3.51E-10 |
| 321.23514 | 94.65  | 19.65 | 17.68 | 19.02 | 19.72 | 1.29E-13 | 5.60E-12 | 7.35E-02 | 9.93E-01 | 5.04E-06 | 1.26E-11 | 5.26E-02 |
| 321.24436 | 239.63 | 18.70 | 17.80 | 18.39 | 18.63 | 2.23E-10 | 5.05E-10 | 8.48E-02 | 9.53E-01 | 1.07E-04 | 6.02E-08 | 3.09E-01 |
| 321.28013 | 291.15 | 17.18 | 16.85 | 16.91 | 17.25 | 2.14E-02 | 1.15E-01 | 2.52E-01 | 9.63E-01 | 9.78E-01 | 4.91E-02 | 1.19E-01 |
| 321.82661 | 83.55  | 15.06 | 15.52 | 15.86 | 15.48 | 4.11E-08 | 1.93E-03 | 4.65E-09 | 7.46E-03 | 3.95E-02 | 9.91E-01 | 2.06E-02 |
| 321.90484 | 43.91  | 17.86 | 18.55 | 18.86 | 18.69 | 1.07E-41 | 1.78E-14 | 5.11E-15 | 5.11E-15 | 6.90E-06 | 1.36E-01 | 3.77E-02 |
| 322.02201 | 26.38  | 17.03 | 17.14 | 16.92 | 16.73 | 6.77E-03 | 7.81E-01 | 7.51E-01 | 4.87E-02 | 2.33E-01 | 4.08E-03 | 3.78E-01 |
| 322.20882 | 225.65 | 18.68 | 18.13 | 18.24 | 18.70 | 9.16E-07 | 5.33E-05 | 1.88E-03 | 9.97E-01 | 7.97E-01 | 6.46E-05 | 1.87E-03 |
| 322.23803 | 100.95 | 15.37 | 12.65 | 14.22 | 15.15 | 3.79E-13 | 1.56E-12 | 5.60E-03 | 9.27E-01 | 9.57E-05 | 6.12E-10 | 5.54E-02 |
| 322.24734 | 144    | 19.32 | 17.00 | 17.67 | 18.45 | 2.58E-16 | 4.37E-14 | 2.52E-09 | 5.57E-03 | 4.88E-02 | 9.49E-07 | 1.96E-02 |
| 322.82142 | 79.96  | 18.72 | 19.55 | 19.82 | 19.46 | 3.62E-20 | 1.46E-12 | 3.97E-14 | 8.30E-10 | 7.24E-02 | 8.33E-01 | 7.62E-03 |
| 322.83869 | 66.33  | 20.93 | 21.50 | 21.97 | 21.59 | 4.73E-24 | 1.95E-09 | 7.33E-15 | 1.96E-11 | 1.98E-06 | 7.88E-01 | 2.29E-04 |
| 322.85132 | 97.62  | 12.61 | 14.15 | 13.83 | 14.25 | 1.13E-04 | 6.57E-04 | 1.02E-02 | 3.51E-04 | 8.54E-01 | 9.94E-01 | 7.28E-01 |
| 322.86276 | 90.5   | 14.86 | 14.64 | 13.93 | 14.57 | 3.34E-05 | 6.79E-01 | 1.46E-05 | 4.55E-01 | 2.19E-03 | 9.82E-01 | 1.04E-02 |
| 322.87856 | 77.8   | 15.91 | 14.88 | 15.74 | 15.60 | 2.67E-16 | 4.25E-14 | 4.35E-01 | 4.03E-02 | 1.44E-11 | 4.70E-08 | 6.33E-01 |
| 322.8939  | 35.73  | 18.38 | 18.34 | 19.14 | 18.11 | 8.97E-07 | 9.96E-01 | 2.18E-04 | 4.84E-01 | 1.51E-04 | 6.39E-01 | 1.11E-06 |
| 322.89963 | 42.74  | 19.79 | 20.39 | 20.66 | 20.53 | 1.91E-40 | 2.62E-14 | 5.11E-15 | 5.11E-15 | 1.19E-05 | 8.48E-02 | 8.63E-02 |
| 322.90523 | 40.33  | 16.40 | 17.28 | 17.34 | 17.11 | 2.93E-36 | 5.11E-15 | 5.11E-15 | 3.95E-14 | 7.36E-01 | 8.38E-02 | 4.45E-03 |
| 322.91445 | 26.89  | 19.29 | 20.49 | 20.59 | 20.43 | 5.67E-25 | 4.31E-14 | 3.18E-14 | 4.35E-14 | 8.29E-01 | 9.74E-01 | 5.88E-01 |
| 322.95551 | 38.54  | 16.49 | 14.02 | 15.11 | 15.36 | 5.78E-10 | 5.26E-11 | 3.95E-04 | 8.39E-03 | 1.08E-02 | 1.44E-03 | 8.97E-01 |
| 322.97737 | 37.26  | 15.96 | 16.07 | 15.66 | 16.23 | 1.78E-01 | 9.73E-01 | 6.35E-01 | 7.11E-01 | 3.95E-01 | 9.23E-01 | 1.35E-01 |

|           |        |       |       |       |       |           |          |          |          |          |          |          |
|-----------|--------|-------|-------|-------|-------|-----------|----------|----------|----------|----------|----------|----------|
| 323.02958 | 19.26  | 21.85 | 24.33 | 23.92 | 23.36 | 2.29E-24  | 1.71E-14 | 4.35E-14 | 6.71E-10 | 2.54E-01 | 2.18E-04 | 7.24E-02 |
| 323.04867 | 17.88  | 17.17 | 18.75 | 18.85 | 18.61 | 5.02E-28  | 3.04E-14 | 1.09E-14 | 4.31E-14 | 9.02E-01 | 7.95E-01 | 3.84E-01 |
| 323.07877 | 24.81  | 14.67 | 18.19 | 18.51 | 16.86 | 2.50E-60  | 5.11E-15 | 5.11E-15 | 7.77E-15 | 3.11E-01 | 1.43E-10 | 4.66E-14 |
| 323.10222 | 62.97  | 14.88 | 19.51 | 13.50 | 13.91 | 1.31E-147 | 5.11E-15 | 5.11E-15 | 4.29E-14 | 5.11E-15 | 5.11E-15 | 2.33E-04 |
| 323.13825 | 212.52 | 14.60 | 9.54  | 9.58  | 10.32 | 8.67E-28  | 1.91E-14 | 1.89E-14 | 4.19E-14 | 1.00E+00 | 3.41E-01 | 3.89E-01 |
| 323.14657 | 55.06  | 15.96 | 19.13 | 19.26 | 18.94 | 2.30E-33  | 6.00E-15 | 5.11E-15 | 1.98E-14 | 9.60E-01 | 9.09E-01 | 6.55E-01 |
| 323.16921 | 88.82  | 10.16 | 13.97 | 12.86 | 14.86 | 4.93E-09  | 1.98E-06 | 1.16E-03 | 8.14E-09 | 4.44E-01 | 6.49E-01 | 4.46E-02 |
| 323.19017 | 166.23 | 17.61 | 16.75 | 16.45 | 17.75 | 7.09E-09  | 9.48E-04 | 2.68E-06 | 9.22E-01 | 5.67E-01 | 1.87E-04 | 4.98E-07 |
| 323.2218  | 243.64 | 21.48 | 21.80 | 21.88 | 22.15 | 1.60E-11  | 8.80E-04 | 1.39E-05 | 2.08E-12 | 7.87E-01 | 7.74E-04 | 1.54E-02 |
| 323.25069 | 128.95 | 15.01 | 10.65 | 13.30 | 14.72 | 2.29E-17  | 4.29E-14 | 2.08E-03 | 9.35E-01 | 7.93E-07 | 2.78E-13 | 2.49E-02 |
| 323.25963 | 177.81 | 20.52 | 19.49 | 20.16 | 20.47 | 2.34E-12  | 1.33E-11 | 4.74E-02 | 9.86E-01 | 2.08E-05 | 9.19E-10 | 1.46E-01 |
| 323.84226 | 76.93  | 15.40 | 15.21 | 15.97 | 15.68 | 3.83E-12  | 2.35E-01 | 9.78E-08 | 2.67E-02 | 7.05E-12 | 5.56E-05 | 2.93E-02 |
| 323.89817 | 29.45  | 13.80 | 14.22 | 14.39 | 13.97 | 2.02E-01  | 4.79E-01 | 1.81E-01 | 9.40E-01 | 9.43E-01 | 8.53E-01 | 5.26E-01 |
| 323.90766 | 24.67  | 15.84 | 16.79 | 16.56 | 16.76 | 6.66E-13  | 3.18E-11 | 4.22E-07 | 3.31E-10 | 3.08E-01 | 9.97E-01 | 4.49E-01 |
| 323.91788 | 33.97  | 13.77 | 14.69 | 15.05 | 14.24 | 1.58E-05  | 2.81E-03 | 9.59E-06 | 2.92E-01 | 5.48E-01 | 3.64E-01 | 1.91E-02 |
| 324.02674 | 17.91  | 13.48 | 14.61 | 14.04 | 13.61 | 4.19E-03  | 3.64E-03 | 3.15E-01 | 9.79E-01 | 3.18E-01 | 2.18E-02 | 6.01E-01 |
| 324.09453 | 18.87  | 20.32 | 21.21 | 21.18 | 21.27 | 1.99E-18  | 1.12E-13 | 3.83E-13 | 5.20E-14 | 9.88E-01 | 9.59E-01 | 8.43E-01 |
| 324.19362 | 168.62 | 14.66 | 13.09 | 13.03 | 14.46 | 6.81E-11  | 2.31E-07 | 5.65E-08 | 8.91E-01 | 9.97E-01 | 2.64E-05 | 8.69E-06 |
| 324.22507 | 246.4  | 18.43 | 18.74 | 18.96 | 19.23 | 4.32E-12  | 1.26E-02 | 1.54E-06 | 1.93E-12 | 1.41E-01 | 3.61E-05 | 5.16E-02 |
| 324.25491 | 156.13 | 15.27 | 14.03 | 14.41 | 14.69 | 1.32E-14  | 4.73E-14 | 2.62E-08 | 5.73E-04 | 4.75E-02 | 9.54E-05 | 2.30E-01 |
| 324.26294 | 169.3  | 18.08 | 16.82 | 17.67 | 17.97 | 6.07E-14  | 2.78E-13 | 4.39E-02 | 9.10E-01 | 1.17E-06 | 1.57E-10 | 2.55E-01 |
| 324.29133 | 197.96 | 16.83 | 16.23 | 16.15 | 16.08 | 3.11E-04  | 9.71E-03 | 1.99E-03 | 8.19E-04 | 9.74E-01 | 8.67E-01 | 9.84E-01 |
| 324.81951 | 85.41  | 14.23 | 15.28 | 15.58 | 15.13 | 8.19E-06  | 6.86E-04 | 5.41E-06 | 6.98E-03 | 7.10E-01 | 9.49E-01 | 3.88E-01 |
| 324.8517  | 98.89  | 14.98 | 14.66 | 14.40 | 14.59 | 7.73E-03  | 2.21E-01 | 3.64E-03 | 1.02E-01 | 4.57E-01 | 9.77E-01 | 7.37E-01 |
| 324.89064 | 48.76  | 17.69 | 19.16 | 19.28 | 18.78 | 9.88E-16  | 2.67E-12 | 7.42E-14 | 4.64E-07 | 9.23E-01 | 2.32E-01 | 5.89E-02 |
| 324.91472 | 151.11 | 18.51 | 16.24 | 15.86 | 17.23 | 1.79E-40  | 5.11E-15 | 5.11E-15 | 1.04E-11 | 1.15E-01 | 4.02E-07 | 1.33E-12 |
| 324.93532 | 50.53  | 18.54 | 18.94 | 19.73 | 19.50 | 1.12E-19  | 7.47E-03 | 4.31E-14 | 3.56E-12 | 7.20E-09 | 1.08E-04 | 2.85E-01 |
| 324.95824 | 33.11  | 16.03 | 15.52 | 15.60 | 15.45 | 4.16E-02  | 9.60E-02 | 2.00E-01 | 4.90E-02 | 9.84E-01 | 9.88E-01 | 9.07E-01 |
| 325.03301 | 22.72  | 18.80 | 18.76 | 18.88 | 19.00 | 2.59E-01  | 9.93E-01 | 9.08E-01 | 3.52E-01 | 7.96E-01 | 2.48E-01 | 7.59E-01 |
| 325.05394 | 57.6   | 16.47 | 16.29 | 17.99 | 17.93 | 8.18E-18  | 8.53E-01 | 8.97E-11 | 1.48E-09 | 2.77E-12 | 5.14E-11 | 9.95E-01 |
| 325.08121 | 47.07  | 14.17 | 20.93 | 12.47 | 12.92 | 1.82E-95  | 5.11E-15 | 1.34E-10 | 7.45E-06 | 5.11E-15 | 5.11E-15 | 2.81E-01 |
| 325.09336 | 153.61 | 20.03 | 19.66 | 19.93 | 20.22 | 4.32E-01  | 6.71E-01 | 9.91E-01 | 9.38E-01 | 8.43E-01 | 3.60E-01 | 8.32E-01 |
| 325.0978  | 19.02  | 16.39 | 17.30 | 17.30 | 17.37 | 6.97E-09  | 1.27E-06 | 1.07E-06 | 3.70E-07 | 1.00E+00 | 9.82E-01 | 9.79E-01 |
| 325.10859 | 17.98  | 15.48 | 15.65 | 15.12 | 15.88 | 4.21E-02  | 9.09E-01 | 4.92E-01 | 4.39E-01 | 1.81E-01 | 8.42E-01 | 2.74E-02 |
| 325.1261  | 26.37  | 16.53 | 17.01 | 16.53 | 16.78 | 7.89E-02  | 1.05E-01 | 1.00E+00 | 6.61E-01 | 1.12E-01 | 7.21E-01 | 6.64E-01 |
| 325.16637 | 285.75 | 14.43 | 20.27 | 18.75 | 20.36 | 6.78E-46  | 5.11E-15 | 6.00E-15 | 5.11E-15 | 2.52E-04 | 9.95E-01 | 1.39E-04 |
| 325.1664  | 172.23 | 15.73 | 14.81 | 15.10 | 14.95 | 2.89E-07  | 4.23E-07 | 8.11E-04 | 3.96E-05 | 3.23E-01 | 8.54E-01 | 8.27E-01 |
| 325.1847  | 286.18 | 21.13 | 22.17 | 22.58 | 21.66 | 4.66E-55  | 5.11E-15 | 5.11E-15 | 1.77E-11 | 7.72E-08 | 2.34E-10 | 5.11E-15 |
| 325.2026  | 182.39 | 16.94 | 15.27 | 15.64 | 15.81 | 5.59E-24  | 1.60E-14 | 4.40E-14 | 6.74E-12 | 6.28E-02 | 3.06E-03 | 6.90E-01 |
| 325.21772 | 206.11 | 20.32 | 19.60 | 20.56 | 20.59 | 1.49E-15  | 1.61E-08 | 1.60E-01 | 1.25E-01 | 2.60E-13 | 4.06E-13 | 9.98E-01 |
| 325.23902 | 248.18 | 22.00 | 22.61 | 22.71 | 22.57 | 1.65E-27  | 4.10E-14 | 7.77E-15 | 4.41E-14 | 4.24E-01 | 9.07E-01 | 1.36E-01 |
| 325.27532 | 202.08 | 18.52 | 18.55 | 19.12 | 19.06 | 6.38E-07  | 9.99E-01 | 3.98E-05 | 5.90E-04 | 1.36E-04 | 1.54E-03 | 9.62E-01 |
| 325.66795 | 285.58 | 14.29 | 18.29 | 17.33 | 18.15 | 2.89E-37  | 5.11E-15 | 2.71E-14 | 5.11E-15 | 4.81E-03 | 9.65E-01 | 2.71E-02 |
| 325.66927 | 177.91 | 9.90  | 11.40 | 12.54 | 8.90  | 2.28E-07  | 7.82E-02 | 1.54E-04 | 3.95E-01 | 2.73E-01 | 1.01E-03 | 3.60E-07 |
| 325.90455 | 28.94  | 13.46 | 14.44 | 13.93 | 14.91 | 1.10E-04  | 1.11E-02 | 4.34E-01 | 7.49E-05 | 3.86E-01 | 5.08E-01 | 1.82E-02 |

|           |        |       |       |       |       |           |          |          |          |          |          |          |
|-----------|--------|-------|-------|-------|-------|-----------|----------|----------|----------|----------|----------|----------|
| 325.99103 | 31.09  | 13.98 | 14.50 | 14.86 | 14.14 | 4.14E-02  | 3.78E-01 | 3.42E-02 | 9.59E-01 | 7.03E-01 | 7.30E-01 | 1.58E-01 |
| 326.0004  | 31.66  | 13.78 | 16.04 | 16.40 | 14.94 | 4.52E-38  | 5.11E-15 | 5.11E-15 | 4.21E-09 | 1.92E-01 | 4.31E-08 | 4.16E-13 |
| 326.0604  | 23.52  | 13.69 | 15.23 | 16.27 | 15.62 | 1.15E-13  | 1.05E-05 | 9.68E-14 | 4.20E-08 | 6.63E-03 | 6.24E-01 | 1.98E-01 |
| 326.08464 | 65.36  | 15.17 | 17.30 | 14.12 | 14.45 | 4.87E-134 | 5.11E-15 | 5.11E-15 | 5.77E-15 | 5.11E-15 | 5.11E-15 | 3.01E-07 |
| 326.09641 | 19.74  | 18.56 | 20.74 | 20.83 | 19.83 | 5.38E-34  | 5.11E-15 | 5.11E-15 | 3.59E-11 | 9.51E-01 | 3.86E-06 | 2.44E-07 |
| 326.11137 | 35.51  | 16.08 | 16.19 | 15.95 | 15.79 | 2.31E-01  | 9.46E-01 | 8.99E-01 | 4.39E-01 | 6.18E-01 | 1.98E-01 | 8.48E-01 |
| 326.18807 | 287.12 | 17.48 | 18.89 | 19.36 | 18.33 | 4.99E-45  | 5.11E-15 | 5.11E-15 | 8.67E-13 | 1.13E-04 | 5.96E-06 | 4.42E-14 |
| 326.18819 | 162.57 | 20.39 | 21.07 | 20.14 | 21.00 | 9.76E-08  | 6.42E-04 | 4.58E-01 | 4.56E-03 | 1.82E-06 | 9.73E-01 | 2.50E-05 |
| 326.21986 | 200.46 | 17.91 | 17.14 | 18.32 | 18.31 | 9.75E-16  | 4.63E-07 | 1.77E-02 | 2.98E-02 | 1.00E-13 | 5.36E-13 | 1.00E+00 |
| 326.24223 | 247.79 | 19.40 | 20.14 | 20.23 | 20.04 | 1.35E-23  | 4.11E-14 | 3.20E-14 | 3.60E-13 | 6.07E-01 | 6.40E-01 | 8.13E-02 |
| 326.27043 | 297.51 | 12.82 | 13.33 | 14.49 | 13.77 | 5.67E-05  | 4.81E-01 | 2.10E-05 | 4.48E-02 | 8.11E-03 | 6.26E-01 | 2.21E-01 |
| 326.27059 | 164.03 | 16.20 | 14.95 | 15.81 | 15.65 | 9.97E-17  | 4.33E-14 | 1.48E-02 | 2.79E-04 | 3.13E-09 | 4.50E-06 | 6.23E-01 |
| 326.27864 | 211.14 | 15.90 | 16.04 | 15.76 | 15.83 | 5.68E-01  | 8.92E-01 | 8.96E-01 | 9.86E-01 | 5.14E-01 | 7.43E-01 | 9.88E-01 |
| 326.82862 | 60.14  | 17.55 | 16.92 | 17.88 | 17.86 | 1.74E-24  | 4.01E-11 | 5.48E-04 | 2.01E-03 | 2.89E-14 | 4.13E-14 | 9.97E-01 |
| 326.83542 | 60.61  | 15.44 | 15.11 | 15.76 | 15.61 | 2.24E-09  | 3.17E-03 | 5.23E-03 | 2.84E-01 | 1.16E-09 | 5.51E-06 | 4.87E-01 |
| 326.84678 | 56.05  | 17.45 | 15.80 | 17.38 | 17.42 | 2.77E-36  | 5.11E-15 | 9.35E-01 | 9.96E-01 | 5.11E-15 | 5.11E-15 | 9.86E-01 |
| 326.85205 | 166.84 | 13.46 | 18.45 | 18.09 | 17.30 | 1.31E-35  | 5.11E-15 | 5.11E-15 | 4.00E-14 | 7.56E-01 | 1.34E-02 | 1.51E-01 |
| 326.85777 | 75.45  | 15.25 | 14.86 | 14.82 | 15.31 | 2.62E-03  | 6.78E-02 | 3.01E-02 | 9.82E-01 | 9.92E-01 | 3.66E-02 | 1.58E-02 |
| 326.8718  | 226.68 | 16.08 | 14.46 | 15.89 | 16.11 | 2.02E-20  | 4.53E-14 | 6.63E-01 | 9.98E-01 | 1.53E-13 | 4.13E-14 | 5.92E-01 |
| 326.88729 | 226.51 | 13.53 | 11.88 | 14.18 | 14.86 | 1.90E-10  | 3.32E-04 | 3.55E-01 | 7.93E-03 | 3.45E-07 | 1.59E-10 | 3.79E-01 |
| 326.89262 | 83.57  | 14.22 | 13.95 | 15.08 | 14.67 | 8.69E-04  | 7.75E-01 | 1.43E-02 | 4.08E-01 | 7.85E-04 | 7.71E-02 | 5.32E-01 |
| 326.90944 | 153.86 | 16.12 | 14.45 | 13.95 | 15.34 | 5.44E-16  | 9.39E-10 | 4.47E-14 | 1.40E-02 | 1.95E-01 | 4.28E-03 | 1.14E-06 |
| 326.98042 | 18.68  | 17.87 | 19.93 | 19.87 | 19.54 | 1.70E-21  | 4.22E-14 | 4.37E-14 | 2.79E-12 | 9.93E-01 | 3.05E-01 | 4.46E-01 |
| 326.98975 | 19.44  | 17.54 | 20.34 | 20.38 | 19.87 | 2.83E-23  | 4.35E-14 | 4.24E-14 | 2.71E-13 | 9.99E-01 | 3.72E-01 | 2.92E-01 |
| 327.01075 | 23.83  | 16.92 | 15.44 | 15.16 | 16.49 | 1.03E-08  | 1.17E-05 | 1.10E-07 | 5.05E-01 | 8.14E-01 | 6.63E-03 | 2.59E-04 |
| 327.02911 | 30.41  | 16.40 | 13.68 | 14.75 | 15.79 | 2.71E-15  | 4.75E-14 | 1.30E-06 | 2.19E-01 | 5.40E-03 | 6.13E-09 | 9.15E-03 |
| 327.06413 | 27.71  | 16.23 | 14.25 | 14.61 | 14.65 | 4.15E-12  | 2.51E-11 | 3.43E-08 | 2.17E-07 | 5.62E-01 | 5.01E-01 | 9.99E-01 |
| 327.07941 | 68.51  | 14.49 | 15.78 | 13.00 | 13.48 | 1.06E-81  | 5.11E-15 | 5.11E-15 | 3.35E-14 | 5.11E-15 | 5.11E-15 | 4.01E-06 |
| 327.18029 | 154.33 | 18.26 | 18.35 | 17.76 | 18.51 | 1.00E-03  | 9.65E-01 | 3.37E-02 | 5.51E-01 | 1.10E-02 | 8.36E-01 | 7.67E-04 |
| 327.19153 | 156.67 | 15.42 | 16.17 | 14.40 | 16.07 | 3.33E-06  | 1.39E-01 | 1.92E-02 | 2.65E-01 | 8.27E-06 | 9.93E-01 | 4.82E-05 |
| 327.2181  | 180.11 | 17.48 | 16.70 | 16.43 | 16.57 | 3.22E-05  | 5.05E-03 | 4.01E-05 | 9.71E-04 | 6.38E-01 | 9.50E-01 | 9.28E-01 |
| 327.22455 | 223.7  | 17.37 | 15.71 | 17.26 | 17.71 | 2.76E-06  | 9.22E-05 | 9.92E-01 | 8.09E-01 | 4.03E-04 | 5.41E-06 | 6.64E-01 |
| 327.23355 | 232.8  | 29.38 | 28.89 | 29.54 | 29.66 | 1.68E-15  | 1.67E-07 | 2.35E-01 | 8.70E-03 | 1.04E-11 | 5.48E-14 | 5.38E-01 |
| 327.25461 | 263.42 | 24.20 | 24.09 | 24.21 | 24.34 | 4.87E-02  | 5.38E-01 | 1.00E+00 | 3.60E-01 | 4.90E-01 | 2.36E-02 | 4.36E-01 |
| 327.2909  | 225.29 | 16.52 | 16.00 | 16.19 | 16.33 | 2.49E-01  | 1.94E-01 | 5.75E-01 | 8.91E-01 | 8.94E-01 | 6.31E-01 | 9.56E-01 |
| 327.42785 | 226.52 | 14.64 | 12.31 | 14.45 | 14.52 | 1.69E-11  | 3.93E-10 | 9.48E-01 | 9.85E-01 | 1.64E-08 | 1.92E-08 | 9.98E-01 |
| 327.45034 | 226.53 | 14.50 | 12.50 | 14.19 | 14.17 | 9.47E-08  | 1.39E-07 | 7.93E-01 | 7.82E-01 | 1.84E-05 | 4.60E-05 | 1.00E+00 |
| 327.5809  | 226.42 | 14.26 | 11.77 | 14.22 | 14.81 | 1.24E-16  | 6.36E-12 | 9.99E-01 | 3.62E-01 | 3.17E-11 | 4.53E-14 | 3.18E-01 |
| 327.59623 | 226.76 | 16.17 | 14.49 | 15.69 | 16.12 | 8.08E-16  | 6.02E-14 | 6.82E-02 | 9.94E-01 | 6.09E-08 | 1.29E-12 | 1.61E-01 |
| 327.92833 | 30.28  | 16.10 | 15.61 | 15.81 | 15.82 | 4.69E-01  | 3.85E-01 | 7.78E-01 | 8.07E-01 | 9.20E-01 | 9.20E-01 | 1.00E+00 |
| 327.95895 | 25.6   | 13.81 | 15.31 | 15.50 | 14.76 | 2.85E-13  | 5.20E-10 | 1.96E-12 | 2.09E-04 | 8.31E-01 | 8.77E-02 | 8.29E-03 |
| 327.97038 | 29.03  | 19.33 | 19.97 | 20.09 | 19.46 | 1.70E-09  | 8.58E-06 | 4.98E-08 | 7.47E-01 | 7.70E-01 | 1.43E-03 | 2.82E-05 |
| 327.98374 | 17.55  | 12.70 | 14.22 | 14.22 | 14.10 | 4.40E-05  | 3.30E-04 | 2.89E-04 | 1.65E-03 | 1.00E+00 | 9.90E-01 | 9.90E-01 |
| 327.99354 | 28.07  | 15.18 | 15.65 | 16.32 | 16.76 | 1.67E-08  | 2.61E-01 | 5.49E-05 | 3.17E-08 | 4.72E-02 | 2.48E-04 | 3.45E-01 |
| 328.03513 | 18.55  | 13.32 | 17.46 | 16.24 | 16.31 | 1.11E-30  | 5.11E-15 | 4.11E-14 | 4.35E-14 | 6.97E-04 | 2.36E-03 | 9.97E-01 |

|           |        |       |       |       |       |           |          |          |          |          |          |          |
|-----------|--------|-------|-------|-------|-------|-----------|----------|----------|----------|----------|----------|----------|
| 328.04646 | 19.46  | 15.55 | 15.97 | 16.18 | 16.03 | 1.47E-03  | 5.99E-02 | 8.91E-04 | 2.38E-02 | 5.84E-01 | 9.79E-01 | 8.36E-01 |
| 328.05954 | 25.09  | 20.44 | 20.55 | 20.34 | 19.90 | 1.53E-02  | 9.42E-01 | 9.47E-01 | 4.36E-02 | 6.99E-01 | 1.15E-02 | 1.65E-01 |
| 328.0831  | 21.67  | 14.62 | 14.47 | 15.00 | 16.10 | 4.97E-05  | 9.76E-01 | 6.65E-01 | 2.33E-04 | 4.31E-01 | 7.30E-05 | 1.43E-02 |
| 328.12876 | 25.29  | 13.26 | 15.13 | 15.24 | 13.89 | 6.19E-15  | 4.24E-11 | 2.23E-12 | 8.47E-02 | 9.77E-01 | 5.00E-05 | 7.08E-06 |
| 328.22855 | 217.66 | 15.79 | 14.48 | 16.24 | 15.31 | 7.45E-03  | 5.18E-02 | 8.07E-01 | 7.89E-01 | 4.52E-03 | 4.17E-01 | 2.96E-01 |
| 328.23658 | 227.77 | 27.34 | 26.67 | 27.29 | 27.55 | 8.13E-20  | 1.96E-13 | 9.33E-01 | 7.18E-02 | 1.52E-11 | 4.32E-14 | 1.76E-02 |
| 328.25792 | 266.32 | 21.83 | 21.78 | 21.89 | 22.00 | 8.76E-02  | 9.41E-01 | 8.91E-01 | 1.98E-01 | 5.93E-01 | 6.79E-02 | 5.86E-01 |
| 328.84421 | 60.71  | 16.22 | 15.66 | 15.83 | 15.98 | 1.56E-04  | 6.94E-05 | 1.06E-02 | 2.43E-01 | 5.30E-01 | 7.45E-02 | 6.72E-01 |
| 328.85021 | 108.21 | 15.85 | 14.12 | 14.19 | 15.04 | 1.99E-22  | 4.10E-14 | 4.46E-14 | 4.29E-05 | 9.75E-01 | 4.44E-06 | 2.38E-05 |
| 328.86007 | 27.94  | 16.44 | 16.93 | 17.60 | 16.64 | 1.95E-07  | 7.00E-02 | 1.09E-07 | 7.57E-01 | 6.87E-03 | 5.21E-01 | 4.89E-05 |
| 328.88064 | 27.96  | 14.79 | 14.88 | 15.10 | 15.13 | 4.19E-01  | 9.79E-01 | 5.56E-01 | 4.85E-01 | 8.10E-01 | 7.41E-01 | 9.99E-01 |
| 328.96363 | 22.28  | 19.30 | 18.85 | 18.76 | 18.86 | 1.14E-04  | 2.61E-03 | 1.50E-04 | 5.61E-03 | 9.00E-01 | 9.99E-01 | 8.51E-01 |
| 328.97478 | 23.77  | 14.48 | 14.78 | 15.01 | 15.14 | 6.53E-02  | 6.35E-01 | 1.64E-01 | 5.93E-02 | 8.30E-01 | 5.46E-01 | 9.57E-01 |
| 328.98496 | 32.27  | 14.70 | 15.44 | 15.04 | 15.29 | 6.37E-02  | 5.18E-02 | 6.36E-01 | 1.95E-01 | 5.19E-01 | 9.58E-01 | 8.42E-01 |
| 329.02236 | 17.11  | 13.19 | 13.47 | 13.78 | 15.28 | 5.08E-05  | 9.16E-01 | 5.15E-01 | 3.49E-05 | 8.96E-01 | 7.29E-04 | 7.26E-03 |
| 329.02983 | 18.88  | 15.88 | 17.37 | 17.02 | 17.10 | 8.10E-04  | 8.29E-04 | 1.71E-02 | 1.26E-02 | 8.04E-01 | 9.06E-01 | 9.97E-01 |
| 329.06257 | 28.93  | 17.07 | 16.38 | 15.92 | 16.01 | 5.28E-05  | 4.15E-02 | 8.34E-05 | 5.85E-04 | 3.24E-01 | 5.45E-01 | 9.88E-01 |
| 329.23722 | 221.81 | 24.30 | 23.42 | 24.16 | 24.29 | 1.00E-21  | 4.11E-14 | 3.78E-01 | 9.99E-01 | 1.00E-13 | 4.31E-14 | 5.00E-01 |
| 329.24912 | 249.2  | 28.58 | 28.35 | 28.63 | 28.58 | 6.11E-03  | 3.11E-02 | 9.27E-01 | 1.00E+00 | 5.97E-03 | 4.16E-02 | 9.47E-01 |
| 329.27019 | 298.77 | 19.95 | 20.37 | 20.97 | 20.62 | 1.14E-07  | 6.40E-02 | 2.90E-08 | 8.40E-04 | 3.42E-03 | 5.03E-01 | 1.98E-01 |
| 329.91721 | 40.78  | 17.94 | 18.47 | 18.74 | 17.83 | 2.90E-08  | 5.40E-03 | 4.07E-06 | 9.07E-01 | 3.31E-01 | 9.86E-04 | 6.15E-07 |
| 329.96636 | 27.95  | 15.68 | 15.01 | 15.12 | 15.17 | 1.09E-03  | 1.24E-03 | 9.18E-03 | 2.95E-02 | 9.32E-01 | 8.28E-01 | 9.93E-01 |
| 330.05535 | 26.61  | 14.46 | 13.62 | 12.58 | 12.81 | 1.86E-03  | 3.81E-01 | 2.12E-03 | 1.31E-02 | 2.15E-01 | 4.62E-01 | 9.76E-01 |
| 330.24088 | 222.38 | 20.21 | 19.40 | 20.12 | 20.08 | 1.02E-16  | 4.35E-14 | 7.75E-01 | 4.96E-01 | 2.00E-12 | 1.55E-10 | 9.64E-01 |
| 330.25249 | 244.12 | 26.57 | 26.15 | 26.61 | 26.48 | 2.10E-05  | 1.56E-04 | 9.68E-01 | 7.99E-01 | 3.36E-05 | 9.03E-03 | 5.46E-01 |
| 330.27352 | 204.14 | 17.99 | 16.87 | 17.39 | 17.31 | 2.26E-03  | 7.64E-04 | 1.58E-01 | 1.02E-01 | 2.87E-01 | 4.69E-01 | 9.93E-01 |
| 330.5758  | 17.05  | 12.79 | 15.29 | 15.35 | 15.28 | 9.00E-11  | 3.20E-08 | 1.09E-08 | 9.09E-08 | 9.99E-01 | 1.00E+00 | 9.98E-01 |
| 330.84361 | 67.53  | 15.59 | 12.57 | 14.54 | 14.85 | 1.49E-25  | 5.77E-15 | 1.38E-04 | 1.80E-02 | 8.45E-13 | 4.53E-14 | 6.33E-01 |
| 330.85976 | 147.73 | 17.87 | 15.91 | 15.24 | 16.66 | 8.15E-31  | 4.22E-14 | 5.11E-15 | 3.09E-08 | 4.34E-03 | 1.64E-03 | 1.48E-10 |
| 330.86559 | 83.83  | 17.35 | 16.37 | 16.82 | 16.62 | 3.52E-18  | 4.37E-14 | 1.04E-06 | 7.48E-11 | 9.19E-05 | 8.30E-02 | 2.29E-01 |
| 330.89103 | 55.76  | 15.01 | 13.65 | 15.68 | 15.46 | 3.04E-20  | 2.88E-10 | 4.23E-03 | 1.22E-01 | 4.17E-14 | 4.75E-14 | 7.14E-01 |
| 330.8997  | 47.49  | 13.17 | 14.65 | 14.48 | 14.34 | 4.18E-04  | 6.99E-04 | 3.29E-03 | 1.52E-02 | 9.70E-01 | 8.65E-01 | 9.86E-01 |
| 330.92204 | 83.41  | 13.56 | 12.16 | 14.19 | 13.88 | 6.48E-05  | 8.53E-03 | 4.64E-01 | 8.89E-01 | 5.17E-05 | 1.36E-03 | 9.06E-01 |
| 330.94321 | 40.08  | 17.43 | 18.84 | 18.91 | 18.65 | 8.08E-43  | 5.11E-15 | 5.11E-15 | 5.33E-15 | 9.01E-01 | 2.13E-01 | 4.44E-02 |
| 330.96341 | 40.22  | 20.43 | 21.42 | 21.38 | 21.49 | 1.27E-14  | 5.91E-11 | 2.19E-10 | 7.08E-12 | 9.92E-01 | 9.54E-01 | 8.53E-01 |
| 330.98026 | 145.4  | 14.93 | 14.68 | 14.29 | 14.69 | 2.16E-03  | 4.27E-01 | 6.99E-04 | 4.93E-01 | 9.90E-02 | 1.00E+00 | 9.66E-02 |
| 330.99946 | 29.92  | 16.70 | 15.70 | 15.80 | 15.13 | 5.52E-04  | 3.16E-02 | 6.32E-02 | 2.07E-04 | 9.92E-01 | 4.46E-01 | 2.87E-01 |
| 331.02871 | 24.91  | 13.33 | 15.20 | 15.10 | 13.90 | 9.25E-08  | 1.95E-06 | 6.09E-06 | 3.97E-01 | 9.92E-01 | 3.52E-03 | 7.96E-03 |
| 331.06867 | 68.06  | 13.83 | 23.62 | 13.46 | 12.26 | 2.87E-107 | 5.11E-15 | 5.37E-01 | 8.73E-07 | 5.11E-15 | 5.11E-15 | 3.97E-04 |
| 331.0896  | 25.46  | 14.88 | 16.70 | 13.54 | 14.03 | 2.38E-82  | 5.11E-15 | 5.11E-15 | 2.18E-13 | 5.11E-15 | 5.11E-15 | 3.55E-05 |
| 331.14616 | 22.48  | 19.28 | 19.72 | 19.66 | 19.36 | 1.95E-02  | 3.90E-02 | 9.47E-02 | 9.71E-01 | 9.83E-01 | 1.52E-01 | 2.90E-01 |
| 331.25583 | 247.45 | 23.50 | 22.88 | 23.27 | 23.15 | 5.40E-07  | 1.10E-07 | 1.45E-01 | 8.04E-03 | 1.83E-03 | 7.85E-02 | 6.69E-01 |
| 331.26475 | 260.51 | 27.85 | 27.29 | 27.55 | 27.45 | 1.23E-06  | 3.73E-07 | 1.53E-02 | 9.65E-04 | 5.28E-02 | 3.87E-01 | 8.04E-01 |
| 331.91543 | 41.8   | 12.92 | 13.03 | 14.69 | 13.15 | 2.99E-03  | 9.97E-01 | 4.38E-03 | 9.72E-01 | 1.19E-02 | 9.96E-01 | 2.86E-02 |
| 331.92342 | 37.66  | 16.69 | 16.55 | 16.73 | 15.87 | 1.68E-02  | 9.63E-01 | 9.99E-01 | 2.64E-02 | 9.32E-01 | 1.04E-01 | 2.16E-02 |

|           |        |       |       |       |       |           |          |          |          |          |          |          |
|-----------|--------|-------|-------|-------|-------|-----------|----------|----------|----------|----------|----------|----------|
| 331.96764 | 43.74  | 15.73 | 16.71 | 16.74 | 16.91 | 1.05E-10  | 3.36E-07 | 1.18E-07 | 2.11E-09 | 9.99E-01 | 7.13E-01 | 7.90E-01 |
| 332.05982 | 26.08  | 12.40 | 15.47 | 13.55 | 14.05 | 3.14E-08  | 4.47E-09 | 7.29E-02 | 4.82E-03 | 6.23E-04 | 2.66E-02 | 7.49E-01 |
| 332.07206 | 55.79  | 15.62 | 20.44 | 14.55 | 14.93 | 5.78E-133 | 5.11E-15 | 4.33E-14 | 2.12E-08 | 5.11E-15 | 5.11E-15 | 7.57E-03 |
| 332.17374 | 279.15 | 16.47 | 22.15 | 20.79 | 21.75 | 2.33E-42  | 5.11E-15 | 6.00E-15 | 5.11E-15 | 1.27E-03 | 7.12E-01 | 5.02E-02 |
| 332.25811 | 242.59 | 19.21 | 18.62 | 19.07 | 18.87 | 1.14E-03  | 6.65E-04 | 7.70E-01 | 1.30E-01 | 2.06E-02 | 3.84E-01 | 6.07E-01 |
| 332.26804 | 262.37 | 25.76 | 25.10 | 25.51 | 25.33 | 1.06E-07  | 3.09E-08 | 8.64E-02 | 9.03E-04 | 1.77E-03 | 1.81E-01 | 4.22E-01 |
| 332.6759  | 285.27 | 15.30 | 20.58 | 18.68 | 20.23 | 4.39E-35  | 5.11E-15 | 4.31E-14 | 5.11E-15 | 8.58E-06 | 8.16E-01 | 6.12E-04 |
| 332.67687 | 175.35 | 11.82 | 14.73 | 14.52 | 11.67 | 7.64E-08  | 3.67E-05 | 1.26E-04 | 9.96E-01 | 9.88E-01 | 3.94E-05 | 1.28E-04 |
| 332.85696 | 130.75 | 15.65 | 10.74 | 11.46 | 13.08 | 1.07E-33  | 5.11E-15 | 7.33E-15 | 7.46E-11 | 1.95E-01 | 9.02E-09 | 8.93E-05 |
| 332.87538 | 137.19 | 15.69 | 11.97 | 12.00 | 13.19 | 1.28E-22  | 4.11E-14 | 4.24E-14 | 1.75E-09 | 1.00E+00 | 1.03E-02 | 1.13E-02 |
| 332.88223 | 37.2   | 18.89 | 17.32 | 16.89 | 17.34 | 9.96E-14  | 1.21E-08 | 3.42E-13 | 3.93E-08 | 3.32E-01 | 1.00E+00 | 3.23E-01 |
| 332.90174 | 44.39  | 20.27 | 18.65 | 20.27 | 20.03 | 4.00E-19  | 4.37E-14 | 1.00E+00 | 5.58E-01 | 4.29E-14 | 1.28E-11 | 5.64E-01 |
| 332.92256 | 40.34  | 22.69 | 24.44 | 24.54 | 24.38 | 1.85E-38  | 5.11E-15 | 5.11E-15 | 5.33E-15 | 8.69E-01 | 9.72E-01 | 6.35E-01 |
| 332.9592  | 41.64  | 16.79 | 14.55 | 15.28 | 15.73 | 1.45E-10  | 3.51E-11 | 7.98E-06 | 5.39E-03 | 9.91E-02 | 1.84E-03 | 4.82E-01 |
| 332.96922 | 35.15  | 13.68 | 12.94 | 13.31 | 14.29 | 1.64E-03  | 1.18E-01 | 6.65E-01 | 2.85E-01 | 7.03E-01 | 8.93E-04 | 2.61E-02 |
| 332.98243 | 32.07  | 14.80 | 16.09 | 16.53 | 14.91 | 2.50E-25  | 1.08E-12 | 3.71E-14 | 9.15E-01 | 4.52E-02 | 5.36E-10 | 4.33E-14 |
| 333.00878 | 23.92  | 16.50 | 17.50 | 17.55 | 16.89 | 1.54E-04  | 1.19E-03 | 5.41E-04 | 4.83E-01 | 9.98E-01 | 1.31E-01 | 8.64E-02 |
| 333.02502 | 17.17  | 14.67 | 15.90 | 14.84 | 15.44 | 5.65E-05  | 9.14E-05 | 9.24E-01 | 3.64E-02 | 1.41E-03 | 4.07E-01 | 1.68E-01 |
| 333.03117 | 19.96  | 12.87 | 15.14 | 14.82 | 14.01 | 4.98E-07  | 9.33E-07 | 2.57E-05 | 4.10E-02 | 8.82E-01 | 5.58E-02 | 2.53E-01 |
| 333.06669 | 55.84  | 18.34 | 19.47 | 17.89 | 17.94 | 4.17E-85  | 5.11E-15 | 4.63E-14 | 7.21E-12 | 5.11E-15 | 5.11E-15 | 7.88E-01 |
| 333.07301 | 71.57  | 14.56 | 15.34 | 13.11 | 13.57 | 1.17E-69  | 4.33E-14 | 5.11E-15 | 2.53E-14 | 5.11E-15 | 5.11E-15 | 3.59E-06 |
| 333.09495 | 27.9   | 18.77 | 18.32 | 18.96 | 18.68 | 3.70E-02  | 1.63E-01 | 8.10E-01 | 9.72E-01 | 2.12E-02 | 4.10E-01 | 5.84E-01 |
| 333.17186 | 287.64 | 14.90 | 16.85 | 14.68 | 16.95 | 4.40E-20  | 3.19E-11 | 8.30E-01 | 1.09E-11 | 5.39E-13 | 9.85E-01 | 2.24E-13 |
| 333.20726 | 204.1  | 16.48 | 14.40 | 14.60 | 14.27 | 1.91E-12  | 1.04E-09 | 2.97E-08 | 2.98E-10 | 9.15E-01 | 9.82E-01 | 7.40E-01 |
| 333.27162 | 264.26 | 22.53 | 21.73 | 22.12 | 21.94 | 1.41E-09  | 5.43E-10 | 2.59E-03 | 1.25E-05 | 7.86E-03 | 3.16E-01 | 4.93E-01 |
| 333.28029 | 285.59 | 24.22 | 23.35 | 23.63 | 23.68 | 6.53E-09  | 1.90E-09 | 5.66E-05 | 4.44E-04 | 1.69E-01 | 9.48E-02 | 9.87E-01 |
| 333.90497 | 66.95  | 15.34 | 13.01 | 14.15 | 14.90 | 3.77E-11  | 2.97E-11 | 1.13E-03 | 5.43E-01 | 3.28E-03 | 3.24E-07 | 1.07E-01 |
| 333.91569 | 31.27  | 16.88 | 16.53 | 16.67 | 16.15 | 1.75E-01  | 6.98E-01 | 9.14E-01 | 1.23E-01 | 9.73E-01 | 6.75E-01 | 4.08E-01 |
| 333.92594 | 46.73  | 18.29 | 20.10 | 20.18 | 20.03 | 9.47E-42  | 5.11E-15 | 5.11E-15 | 5.11E-15 | 9.33E-01 | 9.46E-01 | 6.66E-01 |
| 333.93645 | 30.18  | 17.22 | 18.28 | 18.31 | 18.05 | 2.94E-24  | 4.13E-14 | 3.53E-14 | 1.04E-12 | 9.90E-01 | 1.59E-01 | 7.81E-02 |
| 333.95427 | 36.5   | 14.42 | 14.44 | 14.16 | 14.07 | 5.91E-01  | 1.00E+00 | 8.40E-01 | 7.09E-01 | 8.11E-01 | 6.78E-01 | 9.94E-01 |
| 334.00859 | 25.24  | 16.34 | 17.02 | 17.20 | 17.08 | 4.04E-10  | 2.86E-06 | 1.80E-09 | 6.63E-07 | 5.48E-01 | 9.75E-01 | 8.21E-01 |
| 334.02567 | 30.76  | 14.09 | 14.87 | 14.84 | 15.14 | 5.86E-03  | 5.09E-02 | 6.36E-02 | 4.84E-03 | 1.00E+00 | 8.39E-01 | 7.80E-01 |
| 334.05019 | 33.38  | 16.20 | 15.12 | 15.17 | 15.52 | 1.57E-09  | 1.75E-08 | 6.06E-08 | 1.08E-03 | 9.92E-01 | 1.34E-01 | 2.24E-01 |
| 334.064   | 19.37  | 14.23 | 15.41 | 15.16 | 15.12 | 8.27E-06  | 8.86E-06 | 6.54E-04 | 1.89E-03 | 7.30E-01 | 6.62E-01 | 9.99E-01 |
| 334.09829 | 28.82  | 14.95 | 13.61 | 15.00 | 14.41 | 1.99E-03  | 4.22E-03 | 9.99E-01 | 5.38E-01 | 3.43E-03 | 2.17E-01 | 4.76E-01 |
| 334.12771 | 22.57  | 18.51 | 17.85 | 18.16 | 17.83 | 7.91E-09  | 1.82E-07 | 1.38E-02 | 1.72E-07 | 4.01E-02 | 9.99E-01 | 3.15E-02 |
| 334.15125 | 166.79 | 17.62 | 17.13 | 17.49 | 17.72 | 4.86E-03  | 1.76E-02 | 8.75E-01 | 9.30E-01 | 1.34E-01 | 4.43E-03 | 5.59E-01 |
| 334.20909 | 52.15  | 17.92 | 16.19 | 17.07 | 18.17 | 3.40E-10  | 5.40E-08 | 1.74E-02 | 8.40E-01 | 1.70E-02 | 3.68E-09 | 2.02E-03 |
| 334.27422 | 259.92 | 17.65 | 16.24 | 16.97 | 16.75 | 1.60E-08  | 2.73E-09 | 8.95E-03 | 3.76E-04 | 6.05E-03 | 1.19E-01 | 7.61E-01 |
| 334.28363 | 281.7  | 22.05 | 21.16 | 21.46 | 21.49 | 1.95E-08  | 4.99E-09 | 1.63E-04 | 6.34E-04 | 1.45E-01 | 1.12E-01 | 9.98E-01 |
| 334.81244 | 91.81  | 16.63 | 16.26 | 16.49 | 16.47 | 4.93E-05  | 1.00E-05 | 2.44E-01 | 1.88E-01 | 1.55E-02 | 3.62E-02 | 9.97E-01 |
| 334.839   | 77.86  | 15.41 | 16.22 | 16.40 | 16.17 | 8.28E-08  | 2.62E-05 | 1.29E-07 | 1.60E-04 | 7.33E-01 | 9.91E-01 | 5.64E-01 |
| 334.85994 | 53.6   | 23.42 | 22.94 | 24.12 | 23.83 | 2.52E-29  | 8.12E-07 | 3.86E-13 | 4.67E-05 | 5.11E-15 | 4.40E-14 | 1.10E-02 |
| 334.88016 | 68.47  | 16.06 | 15.80 | 17.23 | 16.80 | 2.09E-31  | 8.66E-02 | 3.09E-14 | 1.16E-09 | 5.11E-15 | 4.62E-14 | 1.29E-03 |

|           |        |       |       |       |       |           |          |          |          |          |          |          |
|-----------|--------|-------|-------|-------|-------|-----------|----------|----------|----------|----------|----------|----------|
| 334.91848 | 43.21  | 20.26 | 20.35 | 20.57 | 20.68 | 3.45E-05  | 7.48E-01 | 4.28E-03 | 7.70E-05 | 9.51E-02 | 4.62E-03 | 6.62E-01 |
| 334.9269  | 46.15  | 16.16 | 17.62 | 17.75 | 17.61 | 4.21E-36  | 5.55E-15 | 5.11E-15 | 6.22E-15 | 6.91E-01 | 1.00E+00 | 6.59E-01 |
| 335.02423 | 67.7   | 13.86 | 13.95 | 14.46 | 15.22 | 2.02E-02  | 9.97E-01 | 5.41E-01 | 2.06E-02 | 6.84E-01 | 4.26E-02 | 3.86E-01 |
| 335.05005 | 21.21  | 17.36 | 16.32 | 17.47 | 17.61 | 1.49E-05  | 7.18E-04 | 9.77E-01 | 8.00E-01 | 2.04E-04 | 4.45E-05 | 9.58E-01 |
| 335.06168 | 25.46  | 19.87 | 19.27 | 19.63 | 19.62 | 2.82E-03  | 8.91E-04 | 4.29E-01 | 3.99E-01 | 1.01E-01 | 1.49E-01 | 1.00E+00 |
| 335.19    | 164.43 | 15.40 | 15.18 | 15.27 | 15.16 | 7.16E-01  | 7.69E-01 | 9.43E-01 | 7.30E-01 | 9.78E-01 | 1.00E+00 | 9.63E-01 |
| 335.19015 | 291.32 | 16.22 | 16.94 | 17.15 | 16.14 | 1.30E-05  | 1.03E-02 | 3.94E-04 | 9.88E-01 | 8.24E-01 | 6.32E-03 | 2.63E-04 |
| 335.22061 | 226.46 | 20.47 | 19.07 | 19.04 | 19.44 | 5.21E-14  | 1.46E-11 | 3.47E-12 | 1.50E-06 | 9.98E-01 | 2.48E-01 | 1.78E-01 |
| 335.22341 | 38.56  | 18.61 | 17.43 | 17.39 | 18.95 | 3.54E-03  | 8.77E-02 | 6.85E-02 | 9.17E-01 | 1.00E+00 | 2.33E-02 | 1.74E-02 |
| 335.25978 | 175.41 | 15.45 | 14.50 | 14.02 | 14.99 | 5.85E-09  | 1.49E-04 | 3.05E-09 | 1.71E-01 | 1.56E-01 | 1.63E-01 | 2.80E-04 |
| 335.28691 | 282.65 | 18.41 | 17.29 | 17.55 | 17.71 | 1.74E-10  | 1.37E-10 | 6.97E-07 | 1.56E-04 | 3.86E-01 | 6.12E-02 | 7.61E-01 |
| 335.86336 | 62.07  | 18.69 | 18.24 | 19.32 | 19.04 | 5.81E-39  | 2.51E-10 | 4.33E-14 | 2.97E-06 | 5.11E-15 | 1.20E-14 | 4.05E-04 |
| 335.91284 | 31.71  | 15.05 | 14.14 | 14.64 | 14.06 | 5.27E-02  | 9.96E-02 | 7.20E-01 | 7.41E-02 | 6.02E-01 | 9.98E-01 | 5.06E-01 |
| 335.92395 | 46.9   | 13.84 | 15.31 | 15.19 | 14.96 | 6.55E-12  | 1.32E-10 | 2.26E-09 | 2.20E-06 | 9.48E-01 | 3.87E-01 | 7.08E-01 |
| 335.95138 | 35.17  | 15.47 | 14.50 | 15.39 | 14.76 | 7.25E-04  | 2.23E-03 | 9.90E-01 | 5.15E-02 | 7.66E-03 | 8.03E-01 | 1.15E-01 |
| 336.02165 | 71.29  | 15.21 | 15.75 | 16.42 | 16.69 | 2.64E-09  | 9.26E-02 | 1.95E-06 | 1.26E-08 | 2.65E-02 | 8.42E-04 | 6.64E-01 |
| 336.06466 | 28.33  | 16.53 | 16.90 | 16.29 | 16.60 | 8.78E-04  | 4.80E-02 | 3.45E-01 | 9.68E-01 | 2.56E-04 | 1.82E-01 | 1.82E-01 |
| 336.22402 | 225.23 | 17.46 | 15.79 | 15.36 | 16.11 | 5.74E-15  | 5.83E-10 | 5.11E-14 | 1.35E-06 | 3.29E-01 | 5.98E-01 | 2.06E-02 |
| 336.2268  | 45.48  | 16.08 | 13.81 | 14.65 | 16.57 | 5.10E-10  | 6.82E-07 | 3.35E-03 | 6.51E-01 | 1.93E-01 | 8.17E-09 | 8.43E-05 |
| 336.25498 | 149    | 16.80 | 15.47 | 16.79 | 16.58 | 1.92E-20  | 4.36E-14 | 1.00E+00 | 4.22E-01 | 4.40E-14 | 3.79E-12 | 4.67E-01 |
| 336.81008 | 93.68  | 15.40 | 15.25 | 15.59 | 15.65 | 1.28E-02  | 6.24E-01 | 4.56E-01 | 2.34E-01 | 4.72E-02 | 1.66E-02 | 9.67E-01 |
| 336.81822 | 80.32  | 15.90 | 17.16 | 17.35 | 16.95 | 1.83E-24  | 4.20E-14 | 2.09E-14 | 1.24E-12 | 4.97E-01 | 3.95E-01 | 1.78E-02 |
| 336.83719 | 89.68  | 13.41 | 13.08 | 13.86 | 13.66 | 2.57E-02  | 5.93E-01 | 2.85E-01 | 7.69E-01 | 1.79E-02 | 1.47E-01 | 8.81E-01 |
| 336.84843 | 100.57 | 13.60 | 13.38 | 13.97 | 13.56 | 8.40E-02  | 7.64E-01 | 3.56E-01 | 9.98E-01 | 5.51E-02 | 8.81E-01 | 3.04E-01 |
| 336.86214 | 55.71  | 17.14 | 18.00 | 17.92 | 19.41 | 3.41E-03  | 4.66E-01 | 5.33E-01 | 1.16E-03 | 9.99E-01 | 1.02E-01 | 7.46E-02 |
| 336.87554 | 49.23  | 22.86 | 23.08 | 23.74 | 23.55 | 2.15E-42  | 8.49E-04 | 5.11E-15 | 6.22E-15 | 7.99E-15 | 1.61E-13 | 5.22E-03 |
| 336.88841 | 22.3   | 15.42 | 15.98 | 15.46 | 15.99 | 1.26E-01  | 2.75E-01 | 9.99E-01 | 2.77E-01 | 3.62E-01 | 1.00E+00 | 3.61E-01 |
| 336.90948 | 29.94  | 15.67 | 14.74 | 15.33 | 14.27 | 2.14E-05  | 7.71E-03 | 6.19E-01 | 2.18E-05 | 1.96E-01 | 4.05E-01 | 3.04E-03 |
| 336.91528 | 51.07  | 16.92 | 16.40 | 16.83 | 16.85 | 2.00E-11  | 7.82E-11 | 6.42E-01 | 8.26E-01 | 1.00E-07 | 6.69E-08 | 9.93E-01 |
| 336.93029 | 34.61  | 15.16 | 15.17 | 15.35 | 15.71 | 2.44E-01  | 1.00E+00 | 9.20E-01 | 2.55E-01 | 9.29E-01 | 2.82E-01 | 6.23E-01 |
| 336.97354 | 17.01  | 15.69 | 17.53 | 17.55 | 17.23 | 4.43E-20  | 4.37E-14 | 4.45E-14 | 1.20E-11 | 9.99E-01 | 5.04E-01 | 4.28E-01 |
| 337.01852 | 29.77  | 15.93 | 17.28 | 16.70 | 17.26 | 3.47E-07  | 2.15E-06 | 1.39E-02 | 5.43E-06 | 1.29E-01 | 1.00E+00 | 1.65E-01 |
| 337.04034 | 32.04  | 16.53 | 16.50 | 16.06 | 16.06 | 1.56E-01  | 9.99E-01 | 3.01E-01 | 3.28E-01 | 3.96E-01 | 4.21E-01 | 1.00E+00 |
| 337.05679 | 18.33  | 14.38 | 15.89 | 15.67 | 16.08 | 1.80E-11  | 1.09E-08 | 9.07E-07 | 3.65E-10 | 8.13E-01 | 8.79E-01 | 3.74E-01 |
| 337.07873 | 19.33  | 17.24 | 17.61 | 17.67 | 17.80 | 8.55E-05  | 1.70E-02 | 2.46E-03 | 6.98E-05 | 9.46E-01 | 4.16E-01 | 7.40E-01 |
| 337.13922 | 54.47  | 13.27 | 19.96 | 11.57 | 11.79 | 2.01E-114 | 5.11E-15 | 4.57E-14 | 1.52E-11 | 5.11E-15 | 5.11E-15 | 7.11E-01 |
| 337.17907 | 226.05 | 19.73 | 19.90 | 20.14 | 20.04 | 1.07E-03  | 3.93E-01 | 6.57E-04 | 2.61E-02 | 1.09E-01 | 5.93E-01 | 7.80E-01 |
| 337.19342 | 229.19 | 17.70 | 16.53 | 16.19 | 17.87 | 4.01E-15  | 1.14E-06 | 1.58E-10 | 8.68E-01 | 4.10E-01 | 1.07E-07 | 1.63E-11 |
| 337.20509 | 172.72 | 18.42 | 18.49 | 18.23 | 18.84 | 1.46E-02  | 9.79E-01 | 6.93E-01 | 1.06E-01 | 4.70E-01 | 2.55E-01 | 6.71E-03 |
| 337.20579 | 288.85 | 16.57 | 17.54 | 18.25 | 17.23 | 3.12E-21  | 5.56E-09 | 2.33E-14 | 1.99E-04 | 5.15E-05 | 2.10E-01 | 5.29E-09 |
| 337.23658 | 263.28 | 21.76 | 21.29 | 21.32 | 21.60 | 2.10E-15  | 7.95E-13 | 8.03E-12 | 3.30E-02 | 9.71E-01 | 1.53E-05 | 8.52E-05 |
| 337.86147 | 65.44  | 15.95 | 14.29 | 16.20 | 16.01 | 2.87E-52  | 5.11E-15 | 5.19E-02 | 9.07E-01 | 5.11E-15 | 5.11E-15 | 2.87E-01 |
| 337.87894 | 56.64  | 18.07 | 18.15 | 18.98 | 18.77 | 7.70E-45  | 4.87E-01 | 5.11E-15 | 9.55E-15 | 5.11E-15 | 4.04E-14 | 3.59E-03 |
| 337.99588 | 26.2   | 14.45 | 15.09 | 14.58 | 14.90 | 2.16E-01  | 2.16E-01 | 9.79E-01 | 5.55E-01 | 4.29E-01 | 9.44E-01 | 7.96E-01 |
| 338.01735 | 22.71  | 15.08 | 15.39 | 15.85 | 16.64 | 1.44E-13  | 3.52E-01 | 2.38E-04 | 1.48E-13 | 7.16E-02 | 4.66E-09 | 3.38E-04 |

|           |        |       |       |       |       |           |          |          |          |          |          |          |
|-----------|--------|-------|-------|-------|-------|-----------|----------|----------|----------|----------|----------|----------|
| 338.03727 | 55.57  | 15.06 | 16.02 | 16.77 | 16.08 | 2.87E-16  | 1.84E-06 | 4.42E-14 | 5.92E-07 | 3.59E-04 | 9.84E-01 | 2.02E-03 |
| 338.04985 | 16.79  | 13.55 | 16.70 | 16.86 | 16.70 | 2.13E-27  | 3.79E-14 | 2.18E-14 | 4.20E-14 | 9.55E-01 | 1.00E+00 | 9.52E-01 |
| 338.06736 | 17.9   | 17.78 | 18.54 | 18.43 | 18.48 | 6.84E-06  | 2.82E-05 | 4.28E-04 | 2.41E-04 | 9.06E-01 | 9.82E-01 | 9.92E-01 |
| 338.07403 | 24.19  | 14.34 | 15.52 | 14.78 | 15.25 | 5.95E-06  | 5.72E-06 | 2.31E-01 | 1.03E-03 | 1.18E-02 | 7.07E-01 | 2.15E-01 |
| 338.14246 | 65.04  | 13.94 | 16.47 | 12.16 | 12.75 | 1.39E-105 | 5.11E-15 | 5.11E-15 | 2.55E-14 | 5.11E-15 | 5.11E-15 | 1.29E-06 |
| 338.1822  | 228.52 | 16.83 | 16.46 | 16.70 | 16.68 | 1.93E-01  | 1.29E-01 | 8.68E-01 | 8.07E-01 | 5.01E-01 | 6.25E-01 | 9.99E-01 |
| 338.19794 | 189.4  | 17.21 | 16.53 | 16.84 | 16.80 | 8.86E-14  | 5.14E-14 | 2.78E-05 | 7.33E-06 | 6.74E-04 | 5.23E-03 | 9.70E-01 |
| 338.20942 | 170.89 | 15.73 | 15.48 | 15.13 | 16.01 | 8.16E-04  | 6.45E-01 | 2.13E-02 | 5.57E-01 | 3.44E-01 | 8.28E-02 | 4.41E-04 |
| 338.23998 | 257.83 | 18.82 | 18.17 | 18.25 | 18.60 | 3.84E-18  | 4.35E-14 | 6.90E-13 | 1.65E-02 | 6.79E-01 | 3.33E-07 | 4.52E-05 |
| 338.27077 | 187.51 | 18.02 | 17.13 | 17.72 | 17.43 | 1.34E-15  | 4.27E-14 | 1.45E-02 | 1.80E-07 | 1.03E-07 | 2.02E-02 | 3.08E-02 |
| 338.81575 | 89.01  | 14.52 | 14.73 | 15.04 | 14.82 | 1.73E-01  | 8.15E-01 | 1.16E-01 | 5.91E-01 | 5.58E-01 | 9.80E-01 | 8.13E-01 |
| 338.83666 | 79.44  | 15.53 | 15.89 | 16.44 | 16.48 | 3.95E-19  | 5.35E-03 | 4.66E-14 | 4.47E-14 | 2.75E-06 | 9.08E-07 | 9.78E-01 |
| 338.84656 | 84.57  | 16.15 | 15.47 | 16.00 | 16.37 | 8.69E-11  | 1.87E-07 | 5.48E-01 | 2.83E-01 | 1.28E-04 | 6.43E-11 | 1.55E-02 |
| 338.85592 | 64.66  | 16.49 | 14.87 | 16.91 | 16.69 | 2.68E-55  | 5.11E-15 | 1.74E-04 | 2.24E-01 | 5.11E-15 | 5.11E-15 | 1.38E-01 |
| 338.86773 | 39.67  | 18.33 | 17.74 | 18.56 | 17.87 | 3.28E-04  | 2.39E-02 | 6.72E-01 | 1.32E-01 | 7.37E-04 | 9.35E-01 | 8.26E-03 |
| 338.87357 | 49.77  | 20.46 | 20.64 | 21.35 | 21.17 | 2.93E-47  | 2.98E-03 | 5.11E-15 | 5.11E-15 | 5.11E-15 | 4.24E-14 | 5.64E-03 |
| 338.87958 | 42.25  | 16.42 | 17.12 | 17.23 | 16.95 | 2.15E-29  | 2.91E-14 | 5.11E-15 | 1.98E-13 | 3.43E-01 | 7.01E-02 | 3.34E-04 |
| 338.88832 | 37.87  | 19.84 | 20.83 | 20.94 | 20.80 | 1.89E-25  | 4.31E-14 | 2.60E-14 | 4.17E-14 | 7.11E-01 | 9.89E-01 | 5.27E-01 |
| 338.9301  | 43.91  | 15.80 | 8.99  | 9.93  | 12.78 | 2.67E-30  | 5.11E-15 | 2.31E-14 | 4.89E-07 | 3.03E-01 | 6.79E-10 | 3.82E-06 |
| 338.93018 | 153.06 | 17.11 | 12.20 | 11.83 | 14.34 | 2.70E-51  | 5.11E-15 | 5.11E-15 | 4.13E-14 | 5.84E-01 | 9.94E-11 | 7.68E-14 |
| 338.95073 | 45.67  | 15.11 | 11.53 | 11.65 | 13.30 | 1.40E-14  | 1.63E-12 | 5.51E-12 | 9.38E-04 | 9.93E-01 | 1.83E-03 | 4.08E-03 |
| 338.98966 | 19.41  | 23.55 | 27.03 | 27.12 | 26.49 | 5.42E-47  | 5.11E-15 | 5.11E-15 | 5.11E-15 | 9.76E-01 | 8.06E-02 | 2.64E-02 |
| 339.06419 | 22.31  | 17.06 | 18.39 | 18.22 | 17.95 | 9.52E-20  | 4.29E-14 | 5.20E-14 | 4.71E-09 | 5.78E-01 | 1.33E-02 | 2.58E-01 |
| 339.18193 | 291.72 | 13.55 | 18.62 | 17.92 | 17.78 | 1.65E-40  | 5.11E-15 | 5.11E-15 | 5.33E-15 | 1.60E-01 | 7.06E-02 | 9.72E-01 |
| 339.19636 | 263.73 | 20.38 | 20.77 | 21.00 | 20.80 | 9.41E-12  | 1.18E-05 | 2.08E-12 | 6.14E-06 | 3.39E-02 | 9.94E-01 | 7.88E-02 |
| 339.19991 | 169.4  | 20.67 | 20.91 | 20.19 | 20.94 | 1.79E-04  | 5.45E-01 | 3.44E-02 | 4.69E-01 | 5.99E-04 | 9.99E-01 | 4.83E-04 |
| 339.20986 | 239.26 | 20.93 | 20.10 | 20.37 | 20.97 | 2.07E-20  | 4.35E-14 | 3.02E-08 | 9.74E-01 | 2.07E-02 | 4.37E-14 | 1.83E-08 |
| 339.21589 | 153.9  | 14.83 | 10.73 | 13.37 | 13.52 | 2.69E-17  | 4.27E-14 | 2.92E-03 | 1.34E-02 | 1.59E-08 | 7.69E-09 | 9.87E-01 |
| 339.21594 | 55.38  | 14.66 | 10.33 | 14.11 | 14.62 | 2.34E-20  | 4.42E-14 | 6.08E-01 | 1.00E+00 | 1.46E-13 | 4.24E-14 | 7.02E-01 |
| 339.23553 | 237.82 | 17.23 | 15.40 | 13.33 | 15.23 | 3.39E-13  | 5.70E-04 | 6.15E-14 | 2.08E-04 | 1.09E-04 | 9.86E-01 | 6.79E-04 |
| 339.25447 | 176.82 | 15.67 | 14.43 | 14.67 | 14.79 | 3.64E-16  | 4.37E-14 | 4.83E-11 | 2.12E-08 | 3.47E-01 | 7.86E-02 | 8.51E-01 |
| 339.27369 | 174.06 | 15.45 | 13.35 | 14.33 | 14.58 | 4.72E-24  | 6.66E-15 | 2.01E-09 | 1.14E-05 | 5.45E-07 | 6.91E-10 | 4.79E-01 |
| 339.6836  | 289.7  | 13.71 | 16.95 | 15.48 | 16.39 | 1.53E-18  | 4.26E-14 | 1.24E-06 | 1.31E-12 | 1.57E-04 | 3.96E-01 | 4.88E-02 |
| 339.87837 | 45.17  | 16.10 | 15.11 | 15.94 | 16.20 | 4.70E-15  | 2.22E-12 | 5.64E-01 | 8.82E-01 | 8.61E-09 | 3.52E-13 | 2.09E-01 |
| 339.89167 | 35.01  | 13.84 | 15.26 | 15.07 | 14.97 | 8.67E-10  | 5.29E-09 | 3.88E-07 | 7.84E-06 | 8.32E-01 | 6.05E-01 | 9.75E-01 |
| 339.9931  | 19.84  | 19.41 | 23.00 | 23.17 | 22.41 | 6.42E-49  | 5.11E-15 | 5.11E-15 | 5.11E-15 | 8.61E-01 | 5.25E-02 | 5.11E-03 |
| 340.04389 | 27.49  | 14.51 | 13.78 | 14.61 | 14.60 | 5.60E-02  | 1.38E-01 | 9.92E-01 | 9.93E-01 | 8.07E-02 | 9.93E-02 | 1.00E+00 |
| 340.1441  | 28.33  | 17.75 | 17.74 | 17.59 | 17.33 | 1.50E-01  | 1.00E+00 | 8.51E-01 | 1.62E-01 | 8.65E-01 | 1.84E-01 | 5.78E-01 |
| 340.20312 | 169.13 | 18.28 | 18.63 | 17.96 | 18.55 | 1.08E-03  | 1.88E-01 | 2.62E-01 | 4.13E-01 | 1.31E-03 | 9.78E-01 | 7.32E-03 |
| 340.21376 | 234.95 | 18.27 | 17.24 | 17.62 | 18.32 | 2.27E-18  | 5.93E-14 | 8.65E-07 | 9.72E-01 | 1.24E-02 | 6.20E-14 | 4.32E-07 |
| 340.23193 | 181.62 | 13.17 | 13.31 | 13.85 | 12.93 | 2.10E-02  | 9.60E-01 | 8.58E-02 | 8.52E-01 | 2.69E-01 | 5.93E-01 | 1.42E-02 |
| 340.28612 | 182.32 | 16.38 | 15.69 | 16.10 | 15.75 | 1.03E-09  | 1.00E-08 | 5.08E-02 | 3.79E-07 | 1.79E-03 | 9.55E-01 | 1.37E-02 |
| 340.80494 | 59.04  | 17.84 | 17.84 | 18.63 | 18.56 | 1.46E-21  | 1.00E+00 | 4.95E-14 | 4.82E-12 | 7.15E-14 | 1.54E-11 | 8.76E-01 |
| 340.81626 | 90.13  | 15.00 | 15.42 | 15.98 | 15.48 | 1.57E-20  | 1.99E-05 | 2.62E-14 | 1.90E-06 | 3.30E-08 | 9.29E-01 | 1.60E-06 |
| 340.82597 | 85.23  | 15.39 | 15.16 | 15.48 | 15.74 | 1.90E-10  | 1.33E-02 | 6.01E-01 | 4.66E-05 | 2.23E-04 | 2.31E-11 | 5.91E-03 |



|           |        |       |       |       |       |          |          |          |          |          |          |          |
|-----------|--------|-------|-------|-------|-------|----------|----------|----------|----------|----------|----------|----------|
| 340.85228 | 87.49  | 14.54 | 14.00 | 14.08 | 14.56 | 4.78E-03 | 2.71E-02 | 7.67E-02 | 9.99E-01 | 9.76E-01 | 3.00E-02 | 7.99E-02 |
| 340.86471 | 49.68  | 18.01 | 18.14 | 18.55 | 18.64 | 8.24E-03 | 9.20E-01 | 4.56E-02 | 1.97E-02 | 2.21E-01 | 1.15E-01 | 9.81E-01 |
| 340.8714  | 56.61  | 16.08 | 15.63 | 16.73 | 16.52 | 2.65E-38 | 3.54E-09 | 4.21E-14 | 1.89E-08 | 5.11E-15 | 6.66E-15 | 2.04E-02 |
| 340.88144 | 93.51  | 14.53 | 14.14 | 13.83 | 14.70 | 4.10E-04 | 2.56E-01 | 5.08E-03 | 8.65E-01 | 4.67E-01 | 6.22E-02 | 6.24E-04 |
| 340.88832 | 50.43  | 18.50 | 17.08 | 16.83 | 16.95 | 4.36E-13 | 1.39E-08 | 1.92E-11 | 1.73E-09 | 7.15E-01 | 9.54E-01 | 9.57E-01 |
| 340.90909 | 48.38  | 16.89 | 16.71 | 18.36 | 18.11 | 7.87E-31 | 5.34E-01 | 3.82E-14 | 6.42E-14 | 1.22E-14 | 4.47E-14 | 3.11E-01 |
| 340.94607 | 38.37  | 13.07 | 12.60 | 11.63 | 13.02 | 2.92E-01 | 9.43E-01 | 2.95E-01 | 1.00E+00 | 6.54E-01 | 9.63E-01 | 3.71E-01 |
| 340.99401 | 18.9   | 17.82 | 21.32 | 21.56 | 20.96 | 4.44E-54 | 5.11E-15 | 5.11E-15 | 5.11E-15 | 6.58E-01 | 2.98E-01 | 2.17E-02 |
| 341.0055  | 17.33  | 16.92 | 16.43 | 16.28 | 16.44 | 2.53E-02 | 1.16E-01 | 2.07E-02 | 1.49E-01 | 9.23E-01 | 1.00E+00 | 9.07E-01 |
| 341.01278 | 27.04  | 13.02 | 14.50 | 14.01 | 15.04 | 5.09E-08 | 4.89E-05 | 1.16E-02 | 2.87E-08 | 4.62E-01 | 3.79E-01 | 1.39E-02 |
| 341.0286  | 44.81  | 16.23 | 16.04 | 18.11 | 18.18 | 3.81E-25 | 8.29E-01 | 5.08E-14 | 5.05E-14 | 4.39E-14 | 4.13E-14 | 9.91E-01 |
| 341.03995 | 19.53  | 17.02 | 17.88 | 18.31 | 18.18 | 5.62E-12 | 1.44E-05 | 3.12E-11 | 7.03E-09 | 9.16E-02 | 3.84E-01 | 9.05E-01 |
| 341.10941 | 137.64 | 17.82 | 17.48 | 17.63 | 17.06 | 1.37E-04 | 1.52E-01 | 6.12E-01 | 4.70E-05 | 8.14E-01 | 7.15E-02 | 5.61E-03 |
| 341.17947 | 164.8  | 14.37 | 13.16 | 13.40 | 13.03 | 1.51E-04 | 1.10E-03 | 1.26E-02 | 3.44E-04 | 8.84E-01 | 9.80E-01 | 6.86E-01 |
| 341.19612 | 175.17 | 16.25 | 16.17 | 15.39 | 16.34 | 7.31E-07 | 9.62E-01 | 1.21E-05 | 9.65E-01 | 1.77E-04 | 7.94E-01 | 4.73E-06 |
| 341.20733 | 233.52 | 18.88 | 18.03 | 18.27 | 18.97 | 5.52E-14 | 4.62E-10 | 9.36E-06 | 8.85E-01 | 2.26E-01 | 5.81E-11 | 1.07E-06 |
| 341.22582 | 251.55 | 17.95 | 16.59 | 16.86 | 17.59 | 5.76E-22 | 4.29E-14 | 1.35E-13 | 4.55E-02 | 1.77E-01 | 7.02E-11 | 2.27E-06 |
| 341.23445 | 169.36 | 16.25 | 16.27 | 16.40 | 15.73 | 1.97E-05 | 9.99E-01 | 6.74E-01 | 8.98E-04 | 7.63E-01 | 8.71E-04 | 1.45E-05 |
| 341.27014 | 277.6  | 18.05 | 18.35 | 18.62 | 18.67 | 2.62E-05 | 1.20E-01 | 1.86E-04 | 9.72E-05 | 2.12E-01 | 1.33E-01 | 9.91E-01 |
| 341.28843 | 285.29 | 15.79 | 16.33 | 15.98 | 16.00 | 5.02E-01 | 4.18E-01 | 9.49E-01 | 9.39E-01 | 7.61E-01 | 8.07E-01 | 1.00E+00 |
| 341.28926 | 190.43 | 15.07 | 12.93 | 13.01 | 13.47 | 3.88E-12 | 1.72E-10 | 4.78E-10 | 4.16E-06 | 9.95E-01 | 3.39E-01 | 4.63E-01 |
| 341.9442  | 20.08  | 17.81 | 18.82 | 19.15 | 19.11 | 3.32E-16 | 1.08E-08 | 7.57E-14 | 1.14E-12 | 1.88E-01 | 3.35E-01 | 9.94E-01 |
| 341.96518 | 32.29  | 13.26 | 14.43 | 14.03 | 13.24 | 9.01E-04 | 3.31E-03 | 9.49E-02 | 1.00E+00 | 6.56E-01 | 5.03E-03 | 1.10E-01 |
| 341.9745  | 32.09  | 13.03 | 14.39 | 14.66 | 13.10 | 7.11E-13 | 4.02E-07 | 9.24E-10 | 9.93E-01 | 7.22E-01 | 5.91E-06 | 2.85E-08 |
| 341.98596 | 34.11  | 16.19 | 15.55 | 15.52 | 15.48 | 1.16E-07 | 1.59E-05 | 6.09E-06 | 2.80E-06 | 9.99E-01 | 9.63E-01 | 9.87E-01 |
| 342.0885  | 59.01  | 17.68 | 18.70 | 19.42 | 18.67 | 2.52E-11 | 6.01E-05 | 2.37E-12 | 1.79E-04 | 1.26E-02 | 9.99E-01 | 1.03E-02 |
| 342.24753 | 209.94 | 17.55 | 16.37 | 17.55 | 16.65 | 1.07E-04 | 1.07E-03 | 1.00E+00 | 2.50E-02 | 1.34E-03 | 8.37E-01 | 2.80E-02 |
| 342.26542 | 160.06 | 16.29 | 15.90 | 16.16 | 15.92 | 1.92E-04 | 6.39E-04 | 5.44E-01 | 2.23E-03 | 5.32E-02 | 9.96E-01 | 1.09E-01 |
| 342.27343 | 206.09 | 15.75 | 15.90 | 15.45 | 16.25 | 3.36E-01 | 9.85E-01 | 8.82E-01 | 6.56E-01 | 7.12E-01 | 8.60E-01 | 2.62E-01 |
| 342.80269 | 71.69  | 16.54 | 16.06 | 17.26 | 17.18 | 3.25E-22 | 3.24E-04 | 9.87E-09 | 9.20E-07 | 4.15E-14 | 4.20E-14 | 9.18E-01 |
| 342.82107 | 63.95  | 15.86 | 14.39 | 16.13 | 16.29 | 5.36E-18 | 2.62E-11 | 5.51E-01 | 1.73E-01 | 6.66E-14 | 4.40E-14 | 8.72E-01 |
| 342.83174 | 74.92  | 14.77 | 14.42 | 15.95 | 15.49 | 4.29E-27 | 2.63E-02 | 4.26E-14 | 4.89E-07 | 7.77E-15 | 3.05E-13 | 2.96E-03 |
| 342.86262 | 83.49  | 14.00 | 15.07 | 15.72 | 15.64 | 1.27E-11 | 1.40E-04 | 1.47E-10 | 3.64E-09 | 4.83E-02 | 1.24E-01 | 9.89E-01 |
| 342.88423 | 98.93  | 16.86 | 14.84 | 15.14 | 15.53 | 2.05E-25 | 1.29E-14 | 4.24E-14 | 1.33E-11 | 3.38E-01 | 1.27E-03 | 1.41E-01 |
| 342.90419 | 149.64 | 16.26 | 15.80 | 15.57 | 16.23 | 2.32E-02 | 2.82E-01 | 3.84E-02 | 1.00E+00 | 8.26E-01 | 3.75E-01 | 6.90E-02 |
| 342.90445 | 54.24  | 19.21 | 19.17 | 18.52 | 18.58 | 4.37E-05 | 9.97E-01 | 7.74E-04 | 4.48E-03 | 2.42E-03 | 1.13E-02 | 9.85E-01 |
| 342.92216 | 34.27  | 13.15 | 14.81 | 15.02 | 13.90 | 8.45E-12 | 1.38E-08 | 9.74E-11 | 3.05E-02 | 8.58E-01 | 8.20E-03 | 4.78E-04 |
| 342.98464 | 49.6   | 15.08 | 10.12 | 9.63  | 12.29 | 3.42E-23 | 4.31E-14 | 3.49E-14 | 1.73E-06 | 7.87E-01 | 4.96E-04 | 8.90E-06 |
| 343.01164 | 19.61  | 16.24 | 17.50 | 17.20 | 16.95 | 4.17E-16 | 4.29E-14 | 1.75E-10 | 7.34E-06 | 1.63E-01 | 1.33E-03 | 3.04E-01 |
| 343.05425 | 20.04  | 15.34 | 15.38 | 15.78 | 15.97 | 8.71E-02 | 9.99E-01 | 3.97E-01 | 1.26E-01 | 5.07E-01 | 1.87E-01 | 9.08E-01 |
| 343.09171 | 111.3  | 12.45 | 15.56 | 15.32 | 16.14 | 4.41E-21 | 5.13E-14 | 3.21E-13 | 4.46E-14 | 9.21E-01 | 4.20E-01 | 1.37E-01 |
| 343.18947 | 181.11 | 15.94 | 11.60 | 12.54 | 13.84 | 2.69E-34 | 5.11E-15 | 1.53E-14 | 4.04E-10 | 1.17E-02 | 8.99E-11 | 2.66E-04 |
| 343.21311 | 165.2  | 16.39 | 16.10 | 16.56 | 15.80 | 8.39E-10 | 4.50E-02 | 3.92E-01 | 1.97E-06 | 3.24E-04 | 4.48E-02 | 1.28E-09 |
| 343.22845 | 108.88 | 22.12 | 20.48 | 21.80 | 22.25 | 5.14E-15 | 1.24E-12 | 3.96E-01 | 9.40E-01 | 2.16E-08 | 5.12E-13 | 1.72E-01 |
| 343.25018 | 202.98 | 18.21 | 17.61 | 18.47 | 17.35 | 3.62E-06 | 3.58E-02 | 6.37E-01 | 1.12E-03 | 1.03E-03 | 6.84E-01 | 1.47E-05 |

|           |        |       |       |       |       |          |          |          |          |          |          |          |
|-----------|--------|-------|-------|-------|-------|----------|----------|----------|----------|----------|----------|----------|
| 343.2647  | 259.24 | 19.17 | 18.18 | 18.64 | 18.11 | 2.58E-13 | 9.50E-11 | 1.01E-03 | 1.70E-11 | 6.89E-03 | 9.68E-01 | 1.87E-03 |
| 343.28591 | 180.56 | 14.81 | 13.62 | 13.03 | 13.20 | 8.77E-08 | 1.07E-03 | 2.07E-07 | 7.16E-06 | 2.63E-01 | 5.92E-01 | 9.55E-01 |
| 343.94428 | 30.97  | 19.37 | 19.37 | 19.80 | 18.96 | 9.14E-03 | 1.00E+00 | 2.45E-01 | 3.02E-01 | 2.60E-01 | 3.37E-01 | 3.33E-03 |
| 343.96758 | 46.18  | 14.49 | 12.18 | 11.98 | 15.32 | 1.37E-20 | 3.20E-09 | 9.11E-11 | 1.03E-01 | 9.48E-01 | 7.97E-14 | 4.37E-14 |
| 343.97476 | 33.41  | 13.14 | 14.35 | 14.80 | 13.42 | 1.63E-10 | 1.92E-05 | 1.58E-09 | 6.99E-01 | 3.00E-01 | 3.45E-03 | 2.59E-06 |
| 343.99591 | 22.18  | 16.41 | 16.39 | 16.24 | 16.96 | 4.51E-01 | 1.00E+00 | 9.80E-01 | 6.24E-01 | 9.86E-01 | 6.24E-01 | 4.08E-01 |
| 344.03294 | 101.9  | 16.19 | 15.08 | 15.26 | 16.88 | 3.99E-08 | 1.83E-03 | 1.30E-02 | 1.18E-01 | 9.31E-01 | 3.21E-07 | 4.52E-06 |
| 344.1361  | 27.13  | 14.66 | 14.23 | 13.89 | 14.77 | 1.63E-01 | 7.33E-01 | 2.54E-01 | 9.94E-01 | 8.61E-01 | 6.14E-01 | 1.92E-01 |
| 344.13824 | 289.85 | 16.45 | 12.10 | 12.18 | 13.35 | 4.46E-21 | 4.25E-14 | 4.30E-14 | 8.14E-10 | 9.98E-01 | 4.51E-02 | 6.55E-02 |
| 344.15453 | 28.64  | 15.63 | 15.68 | 15.73 | 15.76 | 9.79E-01 | 9.99E-01 | 9.89E-01 | 9.78E-01 | 9.98E-01 | 9.94E-01 | 1.00E+00 |
| 344.23172 | 157.56 | 17.77 | 14.68 | 15.56 | 15.57 | 5.97E-15 | 4.93E-14 | 1.23E-08 | 4.32E-08 | 7.28E-02 | 8.46E-02 | 1.00E+00 |
| 344.25419 | 208.58 | 15.86 | 14.95 | 15.24 | 14.37 | 2.01E-03 | 7.35E-02 | 3.36E-01 | 7.95E-04 | 8.75E-01 | 4.61E-01 | 1.23E-01 |
| 344.26835 | 254.08 | 16.46 | 14.88 | 15.45 | 14.82 | 3.16E-13 | 4.10E-11 | 3.12E-05 | 2.89E-11 | 5.16E-02 | 9.95E-01 | 3.22E-02 |
| 344.28145 | 235.79 | 18.92 | 19.25 | 19.41 | 19.67 | 1.40E-03 | 2.87E-01 | 3.95E-02 | 6.26E-04 | 8.27E-01 | 1.41E-01 | 5.45E-01 |
| 344.8203  | 59.05  | 15.37 | 12.76 | 15.21 | 15.56 | 4.76E-36 | 5.11E-15 | 8.44E-01 | 7.70E-01 | 5.77E-15 | 5.11E-15 | 3.13E-01 |
| 344.83362 | 29.16  | 15.07 | 14.66 | 16.41 | 14.60 | 1.16E-02 | 9.02E-01 | 1.03E-01 | 8.67E-01 | 2.15E-02 | 1.00E+00 | 1.97E-02 |
| 344.84175 | 91.38  | 20.61 | 20.69 | 20.64 | 20.53 | 2.78E-01 | 7.07E-01 | 9.84E-01 | 7.69E-01 | 8.98E-01 | 2.08E-01 | 5.70E-01 |
| 344.85436 | 31.64  | 14.43 | 14.47 | 15.11 | 14.94 | 1.22E-01 | 1.00E+00 | 1.74E-01 | 4.58E-01 | 2.40E-01 | 5.49E-01 | 9.59E-01 |
| 344.89577 | 28.07  | 16.82 | 17.93 | 18.16 | 17.20 | 1.67E-08 | 1.59E-05 | 9.26E-08 | 3.77E-01 | 7.60E-01 | 1.56E-02 | 5.24E-04 |
| 344.90248 | 45.87  | 14.94 | 14.10 | 13.90 | 13.71 | 8.66E-02 | 3.56E-01 | 1.69E-01 | 8.85E-02 | 9.80E-01 | 8.83E-01 | 9.84E-01 |
| 344.93755 | 22.96  | 17.73 | 15.47 | 15.52 | 15.78 | 6.67E-11 | 4.57E-09 | 7.14E-09 | 9.46E-07 | 9.99E-01 | 8.40E-01 | 8.96E-01 |
| 344.9589  | 40.52  | 14.91 | 15.05 | 15.25 | 15.25 | 4.20E-01 | 9.36E-01 | 4.70E-01 | 5.09E-01 | 8.39E-01 | 8.58E-01 | 1.00E+00 |
| 344.96808 | 26.3   | 15.65 | 17.47 | 17.61 | 16.93 | 4.44E-33 | 5.77E-15 | 5.11E-15 | 6.20E-14 | 7.89E-01 | 3.08E-03 | 8.31E-05 |
| 344.9795  | 146.65 | 16.34 | 15.43 | 15.52 | 16.42 | 1.09E-13 | 8.46E-09 | 1.90E-07 | 9.47E-01 | 9.23E-01 | 2.72E-09 | 5.59E-08 |
| 344.97978 | 45.79  | 18.02 | 17.85 | 17.92 | 18.16 | 5.48E-01 | 8.51E-01 | 9.68E-01 | 9.18E-01 | 9.86E-01 | 5.06E-01 | 7.11E-01 |
| 345.02392 | 16.98  | 16.90 | 18.67 | 18.47 | 18.48 | 3.43E-17 | 5.28E-14 | 2.46E-12 | 9.54E-12 | 7.93E-01 | 8.31E-01 | 1.00E+00 |
| 345.0843  | 65.01  | 16.48 | 17.91 | 15.80 | 15.96 | 1.62E-79 | 5.11E-15 | 4.24E-14 | 2.48E-10 | 5.11E-15 | 5.11E-15 | 1.41E-01 |
| 345.1064  | 18.45  | 13.92 | 16.45 | 16.05 | 15.30 | 1.14E-13 | 5.15E-13 | 5.96E-10 | 1.92E-04 | 6.11E-01 | 3.81E-03 | 1.07E-01 |
| 345.13259 | 26.41  | 12.63 | 8.45  | 7.85  | 10.31 | 9.39E-09 | 1.66E-06 | 2.60E-08 | 2.35E-02 | 8.80E-01 | 1.16E-01 | 1.67E-02 |
| 345.20505 | 216.72 | 19.84 | 19.37 | 19.79 | 20.25 | 9.60E-14 | 1.19E-05 | 9.51E-01 | 2.42E-04 | 1.70E-04 | 4.83E-14 | 4.07E-05 |
| 345.20789 | 84.38  | 16.13 | 14.80 | 15.52 | 16.20 | 8.26E-05 | 2.91E-04 | 2.29E-01 | 9.96E-01 | 1.25E-01 | 2.95E-04 | 1.84E-01 |
| 345.22868 | 205.02 | 14.79 | 14.87 | 14.65 | 14.94 | 9.42E-01 | 9.98E-01 | 9.90E-01 | 9.89E-01 | 9.68E-01 | 9.99E-01 | 9.33E-01 |
| 345.23527 | 96.35  | 16.30 | 13.83 | 15.95 | 16.54 | 3.80E-17 | 9.75E-14 | 6.23E-01 | 8.59E-01 | 1.91E-10 | 5.05E-14 | 2.23E-01 |
| 345.24398 | 150.37 | 21.81 | 20.14 | 20.99 | 21.01 | 6.80E-13 | 7.68E-14 | 2.31E-04 | 6.11E-04 | 2.63E-04 | 3.05E-04 | 1.00E+00 |
| 345.84514 | 90.71  | 14.76 | 13.79 | 14.08 | 13.99 | 6.97E-08 | 6.82E-08 | 2.39E-04 | 4.57E-05 | 3.00E-01 | 6.47E-01 | 9.52E-01 |
| 345.89108 | 53.4   | 16.60 | 16.04 | 18.00 | 17.25 | 9.87E-28 | 1.60E-03 | 4.41E-14 | 2.03E-04 | 5.33E-15 | 4.80E-12 | 2.71E-05 |
| 345.91561 | 26.24  | 13.47 | 14.28 | 14.78 | 14.83 | 2.88E-06 | 1.94E-02 | 1.91E-05 | 1.79E-05 | 2.93E-01 | 2.38E-01 | 9.98E-01 |
| 345.94266 | 34.79  | 15.06 | 14.67 | 14.63 | 14.43 | 1.08E-01 | 4.09E-01 | 3.21E-01 | 8.01E-02 | 9.99E-01 | 8.23E-01 | 8.83E-01 |
| 345.9749  | 35.17  | 15.57 | 16.01 | 16.31 | 15.95 | 1.99E-07 | 2.21E-03 | 2.77E-08 | 1.40E-02 | 8.05E-02 | 9.69E-01 | 2.85E-02 |
| 346.05678 | 19.37  | 22.92 | 25.61 | 24.80 | 24.39 | 4.03E-22 | 2.13E-14 | 7.07E-13 | 5.19E-08 | 5.97E-03 | 1.55E-05 | 3.60E-01 |
| 346.12811 | 23.59  | 19.42 | 20.28 | 20.39 | 19.97 | 3.24E-14 | 1.09E-10 | 2.99E-13 | 8.21E-05 | 8.05E-01 | 8.06E-02 | 6.25E-03 |
| 346.20845 | 212.95 | 17.13 | 16.44 | 16.97 | 17.57 | 1.54E-14 | 1.49E-07 | 5.03E-01 | 3.51E-03 | 1.43E-04 | 4.36E-14 | 2.44E-05 |
| 346.24733 | 153.57 | 19.88 | 17.96 | 18.95 | 18.86 | 7.65E-18 | 4.11E-14 | 7.98E-06 | 2.22E-06 | 3.82E-06 | 5.71E-05 | 9.72E-01 |
| 346.28712 | 273.3  | 19.27 | 18.15 | 18.48 | 18.38 | 2.72E-19 | 4.07E-14 | 1.29E-10 | 3.32E-12 | 2.18E-02 | 2.05E-01 | 8.36E-01 |
| 346.83373 | 99.79  | 18.26 | 16.47 | 16.54 | 17.24 | 4.83E-24 | 3.60E-14 | 3.94E-14 | 6.55E-08 | 9.74E-01 | 1.35E-04 | 6.12E-04 |

|           |        |       |       |       |       |          |          |          |          |          |          |          |
|-----------|--------|-------|-------|-------|-------|----------|----------|----------|----------|----------|----------|----------|
| 346.8671  | 74.4   | 15.86 | 15.60 | 16.93 | 16.76 | 3.76E-17 | 3.79E-01 | 4.12E-10 | 4.48E-07 | 1.42E-13 | 2.66E-10 | 7.29E-01 |
| 346.89443 | 56.43  | 15.01 | 15.32 | 15.98 | 15.20 | 5.17E-03 | 6.96E-01 | 3.23E-03 | 9.22E-01 | 9.63E-02 | 9.75E-01 | 3.85E-02 |
| 346.91384 | 36.99  | 16.32 | 16.21 | 16.81 | 14.95 | 1.04E-05 | 9.88E-01 | 4.75E-01 | 8.76E-04 | 3.19E-01 | 3.82E-03 | 3.54E-06 |
| 346.9381  | 41.04  | 21.03 | 21.77 | 21.90 | 21.91 | 5.12E-19 | 8.83E-12 | 4.42E-14 | 4.56E-14 | 5.59E-01 | 5.04E-01 | 9.99E-01 |
| 346.96492 | 26.41  | 13.45 | 14.94 | 15.26 | 15.01 | 6.60E-18 | 1.32E-11 | 4.39E-14 | 5.02E-12 | 4.01E-01 | 9.87E-01 | 6.37E-01 |
| 347.00082 | 20.56  | 18.73 | 20.38 | 20.23 | 19.94 | 9.69E-31 | 5.33E-15 | 1.07E-14 | 4.32E-14 | 6.72E-01 | 8.28E-03 | 1.45E-01 |
| 347.03082 | 16.78  | 12.89 | 14.13 | 14.75 | 13.53 | 4.56E-07 | 1.09E-03 | 2.08E-07 | 2.32E-01 | 2.60E-01 | 3.00E-01 | 2.60E-03 |
| 347.04097 | 27.37  | 22.29 | 26.16 | 25.97 | 24.99 | 9.77E-31 | 5.33E-15 | 7.33E-15 | 5.70E-14 | 9.27E-01 | 2.11E-03 | 1.39E-02 |
| 347.10369 | 18.14  | 13.61 | 16.19 | 15.41 | 14.96 | 4.04E-06 | 1.35E-06 | 1.23E-03 | 3.32E-02 | 3.89E-01 | 8.03E-02 | 8.19E-01 |
| 347.13346 | 22.6   | 15.67 | 16.64 | 16.84 | 16.39 | 2.52E-07 | 3.37E-05 | 2.41E-07 | 4.75E-03 | 7.69E-01 | 6.76E-01 | 1.65E-01 |
| 347.17191 | 215.17 | 17.79 | 19.57 | 19.58 | 18.49 | 1.23E-34 | 5.11E-15 | 5.11E-15 | 6.85E-06 | 1.00E+00 | 1.67E-11 | 7.19E-12 |
| 347.18464 | 39.32  | 17.30 | 16.31 | 17.03 | 18.10 | 2.64E-07 | 3.19E-03 | 7.77E-01 | 2.93E-02 | 6.26E-02 | 4.23E-08 | 1.95E-03 |
| 347.22106 | 236.97 | 22.20 | 21.97 | 22.17 | 22.50 | 2.75E-10 | 6.35E-03 | 9.66E-01 | 1.36E-04 | 3.06E-02 | 2.68E-11 | 2.91E-05 |
| 347.24472 | 223.36 | 17.44 | 16.87 | 16.36 | 16.92 | 1.01E-05 | 3.13E-02 | 1.58E-06 | 7.05E-02 | 7.12E-02 | 9.95E-01 | 4.55E-02 |
| 347.25971 | 179.45 | 22.22 | 20.72 | 21.57 | 21.69 | 1.10E-14 | 4.36E-14 | 6.46E-04 | 1.16E-02 | 7.11E-06 | 6.04E-07 | 9.04E-01 |
| 347.88829 | 57.2   | 11.94 | 10.57 | 13.20 | 11.85 | 4.23E-06 | 1.92E-02 | 3.60E-02 | 9.97E-01 | 5.96E-07 | 4.98E-02 | 3.14E-02 |
| 347.94161 | 47.08  | 16.48 | 17.24 | 17.40 | 17.41 | 3.82E-15 | 5.94E-09 | 1.13E-12 | 3.58E-12 | 5.25E-01 | 5.04E-01 | 1.00E+00 |
| 348.02372 | 28.37  | 14.13 | 15.52 | 15.89 | 14.85 | 1.94E-37 | 7.33E-15 | 5.11E-15 | 3.11E-08 | 1.27E-02 | 5.69E-07 | 5.55E-14 |
| 348.03793 | 17.78  | 15.08 | 18.43 | 18.43 | 17.67 | 2.56E-33 | 5.11E-15 | 5.11E-15 | 4.17E-14 | 1.00E+00 | 2.97E-02 | 2.61E-02 |
| 348.04433 | 22.91  | 18.80 | 22.79 | 22.49 | 21.63 | 4.68E-33 | 5.11E-15 | 5.77E-15 | 4.24E-14 | 7.56E-01 | 1.59E-03 | 3.16E-02 |
| 348.06096 | 18.33  | 15.90 | 18.70 | 17.57 | 17.39 | 2.77E-15 | 4.15E-14 | 4.94E-07 | 2.06E-05 | 2.14E-03 | 3.80E-04 | 9.37E-01 |
| 348.08803 | 18.23  | 16.47 | 17.31 | 16.81 | 16.91 | 4.32E-03 | 1.48E-03 | 4.37E-01 | 2.41E-01 | 1.33E-01 | 3.31E-01 | 9.75E-01 |
| 348.17499 | 215.61 | 14.01 | 15.78 | 15.78 | 14.59 | 5.54E-21 | 4.13E-14 | 4.42E-14 | 1.80E-02 | 1.00E+00 | 1.17E-07 | 9.92E-08 |
| 348.18801 | 39.56  | 14.49 | 13.21 | 13.39 | 14.98 | 2.03E-07 | 6.98E-04 | 4.52E-03 | 4.71E-01 | 9.49E-01 | 4.00E-06 | 3.61E-05 |
| 348.2245  | 238.98 | 19.74 | 19.40 | 19.64 | 19.97 | 1.68E-11 | 1.31E-05 | 4.64E-01 | 8.40E-03 | 5.27E-03 | 2.38E-12 | 5.79E-05 |
| 348.26306 | 176.58 | 20.09 | 18.45 | 19.40 | 19.50 | 2.46E-16 | 4.23E-14 | 3.48E-04 | 5.52E-03 | 9.54E-07 | 1.12E-07 | 9.30E-01 |
| 348.30248 | 299.5  | 15.92 | 15.55 | 16.36 | 15.61 | 2.54E-03 | 3.63E-01 | 2.10E-01 | 5.43E-01 | 3.21E-03 | 9.95E-01 | 9.79E-03 |
| 348.83124 | 111.99 | 16.13 | 14.10 | 14.43 | 14.70 | 1.35E-23 | 2.62E-14 | 4.33E-14 | 5.33E-12 | 2.94E-01 | 1.15E-02 | 4.92E-01 |
| 348.8493  | 109.96 | 16.23 | 12.76 | 11.09 | 13.18 | 3.06E-17 | 3.23E-09 | 4.12E-14 | 4.43E-07 | 1.28E-02 | 8.80E-01 | 1.33E-03 |
| 348.85458 | 56.8   | 18.13 | 18.36 | 19.37 | 19.23 | 8.75E-21 | 3.27E-01 | 4.22E-14 | 5.11E-13 | 2.04E-11 | 2.07E-08 | 7.61E-01 |
| 348.87562 | 59.06  | 20.49 | 19.17 | 20.65 | 20.52 | 1.04E-38 | 5.11E-15 | 3.44E-01 | 9.86E-01 | 5.11E-15 | 5.11E-15 | 6.03E-01 |
| 348.89651 | 49.61  | 23.06 | 24.32 | 24.66 | 24.46 | 9.13E-48 | 5.11E-15 | 5.11E-15 | 5.11E-15 | 1.14E-03 | 4.09E-01 | 1.48E-01 |
| 348.90669 | 17.75  | 14.80 | 17.21 | 17.24 | 16.65 | 7.18E-33 | 5.33E-15 | 5.11E-15 | 4.13E-14 | 9.99E-01 | 2.59E-02 | 1.62E-02 |
| 348.9353  | 46.23  | 17.27 | 17.10 | 17.27 | 17.39 | 1.51E-01 | 4.83E-01 | 1.00E+00 | 7.57E-01 | 5.02E-01 | 9.81E-02 | 7.67E-01 |
| 348.94305 | 41.15  | 15.36 | 15.16 | 15.36 | 15.45 | 4.28E-01 | 6.41E-01 | 1.00E+00 | 9.55E-01 | 6.82E-01 | 3.71E-01 | 9.47E-01 |
| 348.95619 | 33.2   | 14.00 | 14.37 | 15.32 | 12.92 | 3.76E-06 | 8.11E-01 | 9.18E-03 | 6.16E-02 | 1.23E-01 | 6.56E-03 | 7.37E-07 |
| 348.97482 | 27.95  | 14.64 | 13.80 | 15.37 | 16.09 | 5.43E-13 | 1.17E-02 | 3.66E-02 | 2.92E-06 | 2.75E-07 | 5.25E-13 | 5.92E-02 |
| 349.00005 | 20.93  | 15.82 | 16.92 | 17.18 | 16.09 | 7.42E-06 | 1.31E-03 | 3.17E-05 | 8.13E-01 | 8.26E-01 | 3.83E-02 | 2.63E-03 |
| 349.02483 | 24.02  | 16.22 | 16.75 | 17.08 | 16.95 | 1.52E-03 | 1.00E-01 | 1.28E-03 | 1.23E-02 | 5.11E-01 | 8.48E-01 | 9.52E-01 |
| 349.04437 | 30.32  | 16.10 | 20.65 | 19.46 | 18.53 | 4.92E-28 | 5.11E-15 | 4.34E-14 | 9.41E-10 | 5.49E-03 | 1.95E-07 | 5.87E-02 |
| 349.05499 | 17.7   | 13.98 | 15.47 | 13.90 | 14.49 | 1.36E-07 | 1.43E-06 | 9.91E-01 | 2.97E-01 | 5.75E-07 | 5.31E-03 | 1.88E-01 |
| 349.06133 | 44.85  | 14.95 | 15.91 | 16.08 | 14.97 | 2.88E-04 | 1.67E-02 | 2.61E-03 | 1.00E+00 | 9.53E-01 | 3.06E-02 | 6.00E-03 |
| 349.16853 | 219.48 | 9.10  | 13.54 | 13.33 | 11.19 | 1.22E-18 | 4.26E-14 | 4.93E-14 | 2.96E-04 | 9.76E-01 | 5.54E-05 | 2.56E-04 |
| 349.20566 | 226.49 | 19.01 | 17.59 | 17.67 | 18.32 | 4.29E-20 | 4.42E-14 | 4.26E-14 | 6.85E-05 | 9.41E-01 | 3.00E-05 | 2.64E-04 |
| 349.23702 | 262.19 | 21.44 | 21.49 | 21.60 | 22.02 | 4.71E-09 | 9.33E-01 | 2.71E-01 | 7.28E-09 | 6.44E-01 | 3.60E-07 | 6.11E-05 |

|           |        |       |       |       |       |          |          |          |          |          |          |          |
|-----------|--------|-------|-------|-------|-------|----------|----------|----------|----------|----------|----------|----------|
| 349.26587 | 176.38 | 16.18 | 13.55 | 15.10 | 15.63 | 4.05E-14 | 6.14E-14 | 2.77E-03 | 3.17E-01 | 1.07E-05 | 5.62E-09 | 3.45E-01 |
| 349.27509 | 275.56 | 20.14 | 19.40 | 20.10 | 20.20 | 6.20E-06 | 6.94E-05 | 9.96E-01 | 9.82E-01 | 2.40E-04 | 3.97E-05 | 9.41E-01 |
| 349.87891 | 71.7   | 15.48 | 14.20 | 14.88 | 14.78 | 1.51E-11 | 1.07E-12 | 1.51E-03 | 2.43E-04 | 3.32E-04 | 4.68E-03 | 9.35E-01 |
| 349.89984 | 43.31  | 18.66 | 19.97 | 20.29 | 20.13 | 4.18E-47 | 5.11E-15 | 5.11E-15 | 5.11E-15 | 5.46E-03 | 4.03E-01 | 3.37E-01 |
| 349.91036 | 31.41  | 16.89 | 17.17 | 17.27 | 17.04 | 1.74E-01 | 4.17E-01 | 1.39E-01 | 8.42E-01 | 9.36E-01 | 9.14E-01 | 6.07E-01 |
| 349.99893 | 34.5   | 14.82 | 14.46 | 14.71 | 15.08 | 2.13E-01 | 5.59E-01 | 9.76E-01 | 8.07E-01 | 8.16E-01 | 1.53E-01 | 5.82E-01 |
| 350.01758 | 27.82  | 16.68 | 15.91 | 15.85 | 16.28 | 1.91E-12 | 1.13E-09 | 3.54E-11 | 4.92E-03 | 9.55E-01 | 1.32E-02 | 2.30E-03 |
| 350.02424 | 29.99  | 16.53 | 15.72 | 15.84 | 15.88 | 4.34E-06 | 1.06E-05 | 1.82E-04 | 7.89E-04 | 9.04E-01 | 8.16E-01 | 9.96E-01 |
| 350.03197 | 24.54  | 15.14 | 14.55 | 14.62 | 14.82 | 3.84E-01 | 3.86E-01 | 4.83E-01 | 8.29E-01 | 9.98E-01 | 9.05E-01 | 9.55E-01 |
| 350.0438  | 31.98  | 15.08 | 17.60 | 16.38 | 14.90 | 4.89E-22 | 4.52E-14 | 5.00E-06 | 9.08E-01 | 3.76E-05 | 4.33E-14 | 7.65E-07 |
| 350.05825 | 42.42  | 14.63 | 17.29 | 17.74 | 15.89 | 4.22E-23 | 4.33E-14 | 3.33E-14 | 2.10E-04 | 4.38E-01 | 5.10E-05 | 3.52E-08 |
| 350.07266 | 30.46  | 16.47 | 16.37 | 16.88 | 16.43 | 7.50E-02 | 9.68E-01 | 1.89E-01 | 9.98E-01 | 8.13E-02 | 9.93E-01 | 1.70E-01 |
| 350.08017 | 27.96  | 15.80 | 13.40 | 14.84 | 14.37 | 6.05E-16 | 4.37E-14 | 1.14E-03 | 8.66E-07 | 6.59E-07 | 2.41E-03 | 3.01E-01 |
| 350.15565 | 27.19  | 18.43 | 17.54 | 17.97 | 17.62 | 2.12E-13 | 2.29E-12 | 4.23E-04 | 5.55E-10 | 1.83E-03 | 8.94E-01 | 2.45E-02 |
| 350.24011 | 264.99 | 18.85 | 18.29 | 18.66 | 19.23 | 1.21E-11 | 1.21E-05 | 3.19E-01 | 8.54E-03 | 1.11E-02 | 2.23E-12 | 2.06E-05 |
| 350.27861 | 273.15 | 17.43 | 16.61 | 17.12 | 17.04 | 3.15E-01 | 2.31E-01 | 8.84E-01 | 8.18E-01 | 6.59E-01 | 7.78E-01 | 9.98E-01 |
| 350.78694 | 82.84  | 15.78 | 15.96 | 16.20 | 16.14 | 8.50E-04 | 3.63E-01 | 9.15E-04 | 9.34E-03 | 1.47E-01 | 4.17E-01 | 9.52E-01 |
| 350.83391 | 55.93  | 22.29 | 22.46 | 23.30 | 23.00 | 9.87E-28 | 1.91E-01 | 7.55E-15 | 2.19E-13 | 4.27E-14 | 4.25E-08 | 5.12E-03 |
| 350.84341 | 43.96  | 14.29 | 13.42 | 14.34 | 12.90 | 3.69E-06 | 1.99E-02 | 9.98E-01 | 5.67E-05 | 1.44E-02 | 3.60E-01 | 4.06E-05 |
| 350.84685 | 62.42  | 13.96 | 8.46  | 9.00  | 10.71 | 4.83E-17 | 4.33E-14 | 2.98E-13 | 4.34E-06 | 8.33E-01 | 3.80E-03 | 4.26E-02 |
| 350.8545  | 61.27  | 18.47 | 18.30 | 19.26 | 18.94 | 8.89E-28 | 1.24E-01 | 4.20E-14 | 1.65E-07 | 7.55E-15 | 2.77E-12 | 6.24E-04 |
| 350.89289 | 44.89  | 20.65 | 21.39 | 21.75 | 21.64 | 2.37E-44 | 1.80E-14 | 5.11E-15 | 5.11E-15 | 1.00E-06 | 2.07E-03 | 3.68E-01 |
| 350.90084 | 47.59  | 16.21 | 17.17 | 17.34 | 17.15 | 2.58E-37 | 5.33E-15 | 5.11E-15 | 9.33E-15 | 1.61E-01 | 9.89E-01 | 9.01E-02 |
| 350.94616 | 30.43  | 14.83 | 14.56 | 15.39 | 14.56 | 3.68E-04 | 5.70E-01 | 3.82E-02 | 6.06E-01 | 8.02E-04 | 1.00E+00 | 1.25E-03 |
| 350.99832 | 68.74  | 15.32 | 15.79 | 16.74 | 17.14 | 4.89E-21 | 4.46E-02 | 4.94E-13 | 4.11E-14 | 3.00E-06 | 6.77E-11 | 1.32E-01 |
| 351.03878 | 31.88  | 17.34 | 16.61 | 16.95 | 16.87 | 9.99E-03 | 4.38E-03 | 2.59E-01 | 1.52E-01 | 4.08E-01 | 6.47E-01 | 9.87E-01 |
| 351.05802 | 18.43  | 18.11 | 19.50 | 19.32 | 19.40 | 3.74E-17 | 5.68E-14 | 8.79E-12 | 2.41E-12 | 6.99E-01 | 9.35E-01 | 9.67E-01 |
| 351.19474 | 226.45 | 18.75 | 18.01 | 18.26 | 18.13 | 2.03E-05 | 1.87E-05 | 9.83E-03 | 8.21E-04 | 3.67E-01 | 8.68E-01 | 8.50E-01 |
| 351.21888 | 25.31  | 21.31 | 20.55 | 21.04 | 22.10 | 1.48E-06 | 2.15E-02 | 7.25E-01 | 1.83E-02 | 2.64E-01 | 3.51E-07 | 7.87E-04 |
| 351.22133 | 264.55 | 21.57 | 21.62 | 21.65 | 21.90 | 7.02E-02 | 9.86E-01 | 9.24E-01 | 5.80E-02 | 9.93E-01 | 1.46E-01 | 2.36E-01 |
| 351.2215  | 183.16 | 16.88 | 16.48 | 16.91 | 16.43 | 7.15E-02 | 2.93E-01 | 9.99E-01 | 2.08E-01 | 2.49E-01 | 9.96E-01 | 1.75E-01 |
| 351.25242 | 45.58  | 15.84 | 15.36 | 15.72 | 16.01 | 1.46E-02 | 6.41E-02 | 9.20E-01 | 8.45E-01 | 2.65E-01 | 9.70E-03 | 4.96E-01 |
| 351.25332 | 278.57 | 19.14 | 19.14 | 19.66 | 19.43 | 1.52E-06 | 1.00E+00 | 1.00E-05 | 4.29E-02 | 1.96E-05 | 5.23E-02 | 1.69E-01 |
| 351.83728 | 56.34  | 17.39 | 17.00 | 18.51 | 18.15 | 1.96E-34 | 1.58E-03 | 3.64E-14 | 2.85E-10 | 5.11E-15 | 4.15E-14 | 6.57E-03 |
| 351.89775 | 49.52  | 15.41 | 16.30 | 16.58 | 16.44 | 2.20E-23 | 1.58E-13 | 3.24E-14 | 4.42E-14 | 6.79E-02 | 6.15E-01 | 6.42E-01 |
| 351.99563 | 62.37  | 16.03 | 17.95 | 18.39 | 17.96 | 8.06E-20 | 5.91E-13 | 4.40E-14 | 1.71E-12 | 2.98E-01 | 1.00E+00 | 3.33E-01 |
| 352.06128 | 17.88  | 14.72 | 15.65 | 15.50 | 15.73 | 3.68E-04 | 1.96E-03 | 1.36E-02 | 9.62E-04 | 9.32E-01 | 9.92E-01 | 8.22E-01 |
| 352.22223 | 23.15  | 18.79 | 17.69 | 18.37 | 19.38 | 1.08E-04 | 9.64E-03 | 6.07E-01 | 3.64E-01 | 2.30E-01 | 4.56E-05 | 3.12E-02 |
| 352.22497 | 259.33 | 18.06 | 17.73 | 17.65 | 17.17 | 4.77E-02 | 7.02E-01 | 5.17E-01 | 2.39E-02 | 9.93E-01 | 2.97E-01 | 4.36E-01 |
| 352.25628 | 288.07 | 16.13 | 15.21 | 15.85 | 15.58 | 1.07E-05 | 4.21E-06 | 3.91E-01 | 1.64E-02 | 3.49E-03 | 2.16E-01 | 4.81E-01 |
| 352.28611 | 177.59 | 15.06 | 12.46 | 14.03 | 13.95 | 4.03E-24 | 6.22E-15 | 1.17E-05 | 5.15E-06 | 4.63E-11 | 1.30E-09 | 9.86E-01 |
| 352.7845  | 94.94  | 13.82 | 14.78 | 14.67 | 14.58 | 5.13E-02 | 6.03E-02 | 1.10E-01 | 2.11E-01 | 9.93E-01 | 9.62E-01 | 9.96E-01 |
| 352.82216 | 93.47  | 13.32 | 13.83 | 13.90 | 13.99 | 6.95E-03 | 6.52E-02 | 2.63E-02 | 9.71E-03 | 9.90E-01 | 8.90E-01 | 9.75E-01 |
| 352.83208 | 55.75  | 20.39 | 20.46 | 21.38 | 21.08 | 4.93E-28 | 8.28E-01 | 1.24E-14 | 2.03E-12 | 4.04E-14 | 8.67E-10 | 4.57E-03 |
| 352.839   | 38.6   | 12.28 | 14.11 | 8.04  | 10.02 | 2.50E-15 | 3.88E-02 | 1.19E-08 | 8.13E-03 | 4.75E-14 | 2.64E-07 | 3.03E-02 |

|           |        |       |       |       |       |           |          |          |          |          |          |          |
|-----------|--------|-------|-------|-------|-------|-----------|----------|----------|----------|----------|----------|----------|
| 352.84946 | 50.82  | 21.70 | 21.81 | 22.76 | 22.50 | 2.38E-31  | 5.96E-01 | 5.77E-15 | 4.26E-14 | 3.33E-14 | 4.76E-12 | 2.28E-02 |
| 352.86589 | 141.32 | 14.69 | 14.13 | 13.59 | 14.86 | 9.20E-04  | 3.35E-01 | 4.80E-03 | 9.56E-01 | 3.66E-01 | 1.58E-01 | 1.55E-03 |
| 352.8835  | 40.95  | 14.63 | 12.50 | 14.47 | 14.20 | 1.12E-03  | 1.37E-03 | 9.91E-01 | 8.84E-01 | 4.88E-03 | 2.63E-02 | 9.72E-01 |
| 352.88938 | 57.57  | 17.33 | 16.02 | 17.40 | 17.34 | 7.29E-42  | 5.11E-15 | 8.18E-01 | 9.99E-01 | 5.11E-15 | 5.11E-15 | 9.01E-01 |
| 352.90421 | 38.99  | 15.91 | 15.39 | 15.61 | 15.83 | 4.58E-04  | 4.53E-04 | 8.81E-02 | 9.37E-01 | 3.51E-01 | 7.28E-03 | 3.46E-01 |
| 352.94572 | 31.79  | 14.67 | 13.09 | 12.47 | 13.88 | 4.68E-03  | 6.42E-02 | 3.16E-03 | 6.26E-01 | 7.75E-01 | 6.33E-01 | 1.46E-01 |
| 352.99812 | 25.91  | 15.06 | 13.66 | 12.53 | 14.98 | 1.29E-05  | 5.76E-02 | 3.70E-05 | 9.99E-01 | 1.87E-01 | 1.13E-01 | 1.98E-04 |
| 353.01372 | 43.43  | 13.46 | 14.15 | 15.94 | 16.25 | 1.28E-10  | 3.98E-01 | 1.76E-07 | 1.31E-08 | 4.18E-04 | 4.49E-05 | 9.06E-01 |
| 353.03526 | 23.57  | 16.00 | 15.69 | 15.12 | 14.45 | 1.43E-03  | 8.57E-01 | 1.14E-01 | 1.04E-03 | 4.99E-01 | 1.83E-02 | 3.77E-01 |
| 353.05303 | 197.13 | 13.67 | 13.98 | 14.30 | 13.35 | 2.20E-03  | 6.01E-01 | 4.89E-02 | 5.65E-01 | 5.61E-01 | 7.27E-02 | 1.37E-03 |
| 353.09708 | 22.69  | 16.95 | 18.10 | 18.52 | 17.75 | 1.10E-19  | 7.83E-12 | 4.06E-14 | 4.05E-06 | 3.80E-02 | 1.37E-01 | 1.68E-05 |
| 353.11284 | 55.37  | 14.98 | 21.39 | 13.71 | 13.96 | 4.05E-143 | 5.11E-15 | 4.22E-14 | 2.84E-12 | 5.11E-15 | 5.11E-15 | 2.56E-01 |
| 353.13391 | 29.16  | 13.34 | 16.22 | 11.25 | 11.94 | 9.80E-91  | 5.11E-15 | 5.11E-15 | 4.20E-14 | 5.11E-15 | 5.11E-15 | 5.41E-05 |
| 353.15083 | 28.22  | 16.41 | 16.77 | 16.80 | 16.14 | 3.57E-03  | 2.48E-01 | 1.71E-01 | 5.44E-01 | 9.98E-01 | 1.32E-02 | 7.19E-03 |
| 353.16013 | 202.72 | 15.29 | 15.35 | 15.69 | 15.63 | 4.16E-01  | 9.97E-01 | 4.84E-01 | 6.48E-01 | 6.37E-01 | 7.82E-01 | 9.97E-01 |
| 353.16601 | 247.9  | 16.19 | 16.68 | 16.87 | 16.89 | 3.73E-02  | 2.80E-01 | 5.56E-02 | 5.82E-02 | 8.90E-01 | 8.72E-01 | 1.00E+00 |
| 353.17432 | 75.3   | 14.49 | 13.85 | 14.15 | 14.69 | 1.18E-02  | 6.29E-02 | 5.40E-01 | 8.77E-01 | 6.59E-01 | 1.17E-02 | 1.90E-01 |
| 353.20068 | 289.97 | 17.49 | 19.10 | 19.71 | 18.04 | 9.23E-53  | 5.11E-15 | 5.11E-15 | 2.69E-05 | 2.37E-06 | 4.44E-14 | 5.11E-15 |
| 353.20091 | 161.12 | 18.88 | 19.13 | 18.71 | 19.73 | 2.68E-06  | 5.40E-01 | 7.93E-01 | 7.23E-05 | 1.25E-01 | 1.23E-02 | 2.01E-06 |
| 353.21157 | 264.06 | 20.25 | 20.21 | 20.39 | 20.15 | 1.16E-02  | 9.40E-01 | 2.10E-01 | 4.81E-01 | 7.03E-02 | 8.30E-01 | 7.22E-03 |
| 353.21544 | 173.74 | 17.71 | 18.54 | 17.86 | 18.50 | 1.71E-06  | 4.24E-05 | 8.13E-01 | 1.70E-04 | 1.86E-03 | 9.97E-01 | 5.20E-03 |
| 353.22535 | 26.67  | 14.80 | 12.79 | 13.43 | 15.46 | 9.21E-13  | 1.26E-07 | 4.84E-04 | 2.48E-01 | 2.72E-01 | 2.69E-11 | 3.39E-07 |
| 353.23435 | 81.46  | 15.20 | 11.30 | 13.82 | 14.86 | 2.79E-18  | 4.49E-14 | 4.45E-03 | 8.47E-01 | 3.97E-08 | 1.43E-13 | 7.68E-02 |
| 353.23436 | 21.72  | 19.63 | 18.38 | 18.99 | 20.23 | 1.95E-09  | 2.60E-05 | 7.18E-02 | 1.30E-01 | 1.15E-01 | 1.91E-09 | 7.68E-05 |
| 353.23531 | 176.42 | 14.82 | 14.80 | 15.00 | 13.66 | 3.64E-11  | 1.00E+00 | 7.53E-01 | 1.91E-08 | 7.11E-01 | 7.76E-08 | 1.86E-10 |
| 353.27001 | 273.58 | 19.09 | 18.67 | 19.03 | 18.99 | 2.20E-02  | 1.83E-02 | 9.76E-01 | 8.93E-01 | 6.42E-02 | 1.54E-01 | 9.90E-01 |
| 353.2703  | 191    | 15.60 | 13.91 | 14.36 | 14.87 | 2.80E-23  | 1.75E-14 | 6.98E-14 | 1.68E-05 | 1.90E-02 | 2.84E-08 | 6.49E-03 |
| 353.28179 | 260.7  | 17.71 | 16.97 | 17.19 | 17.02 | 3.56E-04  | 6.27E-04 | 2.78E-02 | 2.20E-03 | 6.66E-01 | 9.96E-01 | 8.17E-01 |
| 353.30676 | 274.61 | 17.28 | 18.11 | 18.36 | 17.80 | 8.75E-04  | 1.39E-02 | 5.44E-04 | 2.48E-01 | 8.15E-01 | 7.06E-01 | 2.14E-01 |
| 353.83545 | 67.25  | 15.25 | 14.32 | 16.11 | 15.73 | 1.08E-20  | 3.27E-07 | 2.45E-06 | 2.49E-02 | 3.66E-14 | 2.67E-13 | 1.40E-01 |
| 353.85289 | 58.77  | 16.82 | 16.20 | 17.92 | 17.58 | 2.48E-31  | 1.06E-05 | 4.55E-14 | 8.46E-08 | 5.11E-15 | 4.01E-14 | 6.09E-02 |
| 354.00855 | 30.33  | 15.04 | 15.01 | 15.37 | 15.47 | 7.94E-01  | 1.00E+00 | 9.24E-01 | 8.58E-01 | 9.18E-01 | 8.51E-01 | 9.98E-01 |
| 354.02794 | 20.63  | 18.01 | 19.64 | 19.69 | 19.45 | 3.03E-39  | 5.11E-15 | 5.11E-15 | 7.11E-15 | 9.86E-01 | 3.85E-01 | 2.14E-01 |
| 354.07354 | 20.53  | 21.21 | 22.59 | 22.60 | 22.27 | 2.19E-28  | 1.38E-14 | 1.04E-14 | 5.13E-14 | 1.00E+00 | 5.21E-02 | 4.12E-02 |
| 354.11647 | 63.6   | 16.82 | 18.28 | 16.24 | 16.36 | 3.14E-89  | 5.11E-15 | 4.26E-14 | 1.42E-10 | 5.11E-15 | 5.11E-15 | 2.32E-01 |
| 354.20408 | 153.05 | 16.18 | 16.22 | 15.65 | 16.95 | 5.66E-07  | 9.97E-01 | 5.53E-02 | 2.37E-03 | 3.99E-02 | 6.36E-03 | 7.06E-08 |
| 354.21499 | 257.97 | 17.17 | 17.18 | 17.38 | 16.97 | 1.73E-03  | 9.98E-01 | 1.35E-01 | 1.95E-01 | 2.16E-01 | 1.57E-01 | 4.89E-04 |
| 354.21893 | 166.84 | 15.03 | 15.84 | 14.85 | 15.89 | 1.25E-05  | 5.36E-03 | 8.92E-01 | 3.74E-03 | 5.68E-04 | 9.98E-01 | 3.99E-04 |
| 354.2378  | 25.64  | 17.06 | 14.79 | 15.98 | 17.55 | 1.06E-11  | 1.48E-08 | 1.70E-02 | 5.49E-01 | 8.32E-03 | 6.22E-11 | 3.16E-04 |
| 354.24771 | 199.47 | 15.07 | 15.48 | 16.42 | 14.85 | 3.93E-06  | 5.15E-01 | 5.65E-05 | 8.92E-01 | 1.36E-02 | 1.91E-01 | 7.24E-06 |
| 354.3018  | 180.24 | 15.42 | 14.09 | 15.50 | 14.96 | 3.57E-13  | 3.90E-11 | 9.71E-01 | 6.79E-02 | 7.14E-12 | 6.92E-05 | 2.54E-02 |
| 354.81072 | 87.73  | 15.42 | 16.10 | 16.53 | 16.48 | 5.75E-25  | 6.47E-10 | 2.31E-14 | 4.24E-14 | 2.42E-04 | 2.74E-03 | 9.56E-01 |
| 354.8205  | 85.34  | 15.11 | 14.02 | 14.86 | 15.09 | 1.60E-13  | 2.97E-12 | 2.95E-01 | 9.99E-01 | 1.20E-07 | 7.24E-11 | 4.17E-01 |
| 354.83025 | 56.97  | 16.75 | 15.91 | 17.76 | 17.40 | 4.34E-44  | 2.73E-13 | 4.35E-14 | 2.12E-08 | 5.11E-15 | 5.11E-15 | 7.13E-03 |
| 354.84173 | 48.12  | 17.68 | 16.17 | 17.16 | 16.70 | 2.04E-11  | 7.87E-12 | 4.30E-02 | 1.98E-05 | 1.67E-05 | 6.32E-02 | 1.34E-01 |

|           |        |       |       |       |       |          |          |          |          |          |          |          |
|-----------|--------|-------|-------|-------|-------|----------|----------|----------|----------|----------|----------|----------|
| 354.84982 | 42.53  | 19.70 | 19.49 | 20.76 | 20.51 | 3.75E-26 | 2.63E-01 | 4.31E-14 | 2.80E-10 | 3.06E-14 | 6.57E-14 | 1.66E-01 |
| 354.86278 | 43.95  | 20.39 | 20.35 | 20.51 | 20.81 | 2.72E-03 | 9.90E-01 | 7.67E-01 | 6.27E-03 | 6.00E-01 | 3.18E-03 | 9.81E-02 |
| 354.88135 | 41.31  | 12.90 | 11.38 | 12.44 | 11.91 | 5.25E-02 | 3.84E-02 | 8.43E-01 | 3.20E-01 | 2.60E-01 | 8.14E-01 | 8.05E-01 |
| 354.90411 | 161.3  | 18.06 | 16.15 | 15.77 | 16.94 | 1.33E-32 | 1.60E-14 | 5.11E-15 | 3.07E-09 | 1.26E-01 | 5.78E-05 | 9.57E-10 |
| 354.92547 | 33.01  | 20.12 | 22.01 | 21.63 | 21.67 | 8.85E-20 | 4.33E-14 | 8.61E-13 | 1.15E-12 | 2.10E-01 | 3.43E-01 | 9.96E-01 |
| 354.96602 | 33.23  | 16.07 | 13.62 | 13.27 | 14.38 | 9.27E-13 | 1.75E-09 | 4.07E-12 | 8.42E-05 | 7.83E-01 | 2.12E-01 | 2.26E-02 |
| 354.99612 | 26.03  | 16.29 | 17.19 | 17.25 | 16.49 | 4.81E-06 | 2.56E-04 | 7.16E-05 | 8.17E-01 | 9.94E-01 | 1.17E-02 | 4.74E-03 |
| 355.03139 | 21.29  | 15.28 | 15.34 | 15.53 | 15.34 | 8.79E-01 | 9.97E-01 | 8.59E-01 | 9.98E-01 | 9.40E-01 | 1.00E+00 | 9.40E-01 |
| 355.0679  | 20.88  | 15.11 | 14.54 | 14.91 | 14.71 | 2.34E-01 | 1.94E-01 | 8.96E-01 | 5.40E-01 | 5.83E-01 | 9.36E-01 | 9.17E-01 |
| 355.07705 | 17.64  | 17.33 | 18.78 | 18.88 | 18.50 | 5.14E-29 | 1.91E-14 | 6.22E-15 | 4.21E-14 | 8.64E-01 | 1.66E-01 | 2.46E-02 |
| 355.11046 | 173.15 | 14.55 | 15.25 | 15.16 | 14.01 | 9.28E-10 | 1.42E-03 | 6.48E-03 | 2.98E-02 | 9.68E-01 | 1.38E-08 | 1.12E-07 |
| 355.11099 | 64.98  | 7.51  | 16.84 | 8.25  | 7.72  | 9.81E-64 | 5.11E-15 | 2.97E-01 | 9.61E-01 | 5.11E-15 | 5.11E-15 | 6.40E-01 |
| 355.25046 | 196.1  | 15.74 | 16.67 | 16.93 | 14.39 | 6.57E-13 | 1.87E-02 | 1.06E-03 | 3.00E-04 | 8.51E-01 | 5.61E-10 | 3.71E-12 |
| 355.26544 | 254.56 | 23.56 | 22.96 | 23.55 | 23.44 | 1.34E-05 | 3.86E-05 | 1.00E+00 | 8.12E-01 | 7.49E-05 | 2.96E-03 | 8.50E-01 |
| 355.85107 | 60.03  | 15.09 | 12.71 | 15.29 | 15.03 | 4.25E-29 | 1.87E-14 | 7.52E-01 | 9.93E-01 | 7.11E-15 | 3.95E-14 | 6.20E-01 |
| 355.92878 | 35.72  | 16.17 | 17.81 | 17.65 | 17.28 | 3.43E-15 | 1.25E-13 | 7.72E-12 | 8.37E-07 | 8.59E-01 | 5.62E-02 | 2.79E-01 |
| 355.98106 | 27.67  | 14.01 | 14.75 | 14.49 | 14.90 | 2.00E-02 | 6.05E-02 | 3.52E-01 | 1.94E-02 | 8.25E-01 | 9.66E-01 | 5.56E-01 |
| 356.0075  | 30.65  | 13.60 | 14.00 | 14.61 | 14.40 | 6.10E-03 | 5.59E-01 | 5.10E-03 | 5.05E-02 | 2.00E-01 | 5.80E-01 | 9.18E-01 |
| 356.05285 | 20.87  | 14.02 | 14.03 | 14.87 | 15.42 | 2.60E-06 | 1.00E+00 | 1.67E-02 | 2.10E-05 | 2.45E-02 | 4.48E-05 | 2.56E-01 |
| 356.05974 | 21.64  | 14.80 | 13.35 | 12.55 | 13.08 | 7.23E-10 | 1.06E-04 | 3.98E-10 | 5.34E-06 | 8.58E-02 | 8.71E-01 | 4.14E-01 |
| 356.07786 | 20.56  | 14.99 | 16.05 | 16.29 | 15.98 | 2.08E-07 | 4.99E-05 | 2.96E-07 | 2.67E-04 | 7.41E-01 | 9.92E-01 | 5.83E-01 |
| 356.12207 | 30.1   | 17.56 | 19.17 | 19.41 | 17.89 | 7.36E-09 | 1.05E-05 | 2.65E-07 | 7.63E-01 | 8.99E-01 | 1.51E-03 | 9.36E-05 |
| 356.2264  | 152.86 | 16.65 | 16.62 | 16.47 | 16.28 | 3.36E-01 | 9.99E-01 | 8.22E-01 | 3.32E-01 | 8.97E-01 | 4.35E-01 | 8.37E-01 |
| 356.26824 | 250.48 | 21.51 | 20.85 | 21.49 | 21.36 | 6.33E-07 | 2.39E-06 | 1.00E+00 | 6.81E-01 | 6.08E-06 | 8.20E-04 | 7.48E-01 |
| 356.28128 | 166.27 | 14.14 | 12.75 | 13.36 | 13.05 | 8.45E-07 | 5.04E-07 | 1.08E-02 | 2.03E-04 | 8.01E-02 | 6.62E-01 | 6.36E-01 |
| 356.3425  | 19.27  | 12.88 | 12.20 | 10.69 | 16.02 | 2.65E-36 | 1.51E-01 | 3.98E-10 | 4.14E-14 | 4.37E-05 | 2.09E-14 | 5.11E-15 |
| 356.79042 | 93.31  | 11.54 | 14.01 | 14.00 | 14.00 | 5.39E-12 | 2.87E-09 | 2.33E-09 | 8.39E-09 | 1.00E+00 | 1.00E+00 | 1.00E+00 |
| 356.80007 | 89.15  | 14.13 | 14.62 | 15.18 | 15.29 | 8.33E-06 | 1.90E-01 | 1.14E-04 | 3.72E-05 | 1.07E-01 | 4.83E-02 | 9.77E-01 |
| 356.80888 | 87.35  | 13.24 | 13.60 | 13.66 | 13.98 | 2.35E-04 | 1.08E-01 | 4.46E-02 | 5.98E-05 | 9.88E-01 | 1.15E-01 | 2.15E-01 |
| 356.82665 | 80.49  | 11.40 | 13.52 | 13.91 | 14.55 | 6.03E-12 | 4.48E-06 | 2.88E-08 | 1.78E-11 | 7.91E-01 | 8.74E-02 | 4.52E-01 |
| 356.83925 | 51.32  | 16.84 | 15.07 | 15.60 | 15.76 | 9.63E-19 | 4.36E-14 | 7.83E-11 | 3.86E-08 | 1.73E-02 | 1.51E-03 | 8.35E-01 |
| 356.84664 | 44.2   | 16.19 | 15.18 | 17.04 | 16.71 | 1.34E-29 | 2.63E-11 | 1.52E-08 | 1.70E-03 | 5.11E-15 | 3.77E-14 | 1.05E-01 |
| 356.86161 | 37.26  | 17.03 | 17.48 | 17.24 | 17.41 | 6.29E-01 | 6.11E-01 | 9.42E-01 | 7.54E-01 | 9.15E-01 | 9.97E-01 | 9.72E-01 |
| 356.92014 | 144.08 | 16.16 | 13.95 | 14.26 | 14.61 | 3.00E-18 | 4.29E-14 | 2.47E-13 | 5.43E-09 | 5.65E-01 | 4.24E-02 | 4.96E-01 |
| 356.9412  | 38.85  | 19.01 | 21.18 | 20.84 | 20.83 | 3.43E-23 | 3.71E-14 | 4.29E-14 | 4.85E-14 | 3.68E-01 | 3.66E-01 | 1.00E+00 |
| 356.99152 | 17.85  | 19.07 | 19.66 | 19.49 | 19.85 | 2.80E-02 | 1.06E-01 | 3.73E-01 | 2.15E-02 | 9.10E-01 | 9.13E-01 | 5.56E-01 |
| 357.09019 | 20.39  | 20.96 | 20.90 | 20.48 | 20.07 | 6.06E-06 | 9.86E-01 | 3.73E-02 | 1.44E-05 | 1.06E-01 | 1.08E-04 | 1.28E-01 |
| 357.18397 | 89.87  | 14.49 | 12.47 | 14.71 | 15.42 | 8.22E-15 | 1.93E-08 | 9.04E-01 | 2.90E-02 | 9.84E-10 | 5.51E-14 | 1.59E-01 |
| 357.22986 | 167.37 | 13.66 | 12.76 | 14.88 | 12.73 | 8.16E-05 | 2.80E-01 | 6.61E-02 | 2.76E-01 | 2.62E-04 | 1.00E+00 | 3.20E-04 |
| 357.27093 | 250.32 | 18.10 | 17.16 | 18.06 | 18.06 | 1.03E-10 | 3.22E-09 | 9.93E-01 | 9.95E-01 | 2.80E-08 | 7.38E-08 | 1.00E+00 |
| 357.2803  | 268.44 | 23.88 | 23.16 | 23.65 | 23.38 | 9.53E-07 | 6.88E-07 | 2.86E-01 | 1.32E-03 | 1.89E-03 | 4.07E-01 | 1.96E-01 |
| 357.86644 | 67.97  | 14.78 | 10.82 | 13.48 | 12.28 | 5.85E-08 | 2.25E-08 | 1.80E-01 | 1.13E-03 | 4.14E-04 | 1.44E-01 | 2.81E-01 |
| 357.91979 | 30.58  | 14.81 | 15.28 | 14.79 | 14.18 | 2.91E-02 | 5.14E-01 | 1.00E+00 | 2.72E-01 | 4.88E-01 | 1.29E-02 | 3.22E-01 |
| 357.93433 | 31.19  | 14.40 | 15.66 | 15.67 | 14.62 | 6.48E-05 | 1.22E-03 | 8.70E-04 | 9.13E-01 | 1.00E+00 | 1.95E-02 | 1.55E-02 |
| 357.94587 | 33.52  | 14.70 | 16.66 | 16.49 | 16.32 | 7.34E-18 | 4.29E-14 | 1.86E-13 | 8.53E-11 | 8.69E-01 | 4.49E-01 | 8.78E-01 |

|           |        |       |       |       |       |          |          |          |          |          |          |          |
|-----------|--------|-------|-------|-------|-------|----------|----------|----------|----------|----------|----------|----------|
| 357.96012 | 36.06  | 15.83 | 14.59 | 14.28 | 14.34 | 3.05E-06 | 8.63E-04 | 1.38E-05 | 5.88E-05 | 7.90E-01 | 8.80E-01 | 9.99E-01 |
| 357.99488 | 17.24  | 14.78 | 14.32 | 13.76 | 15.10 | 3.72E-03 | 6.03E-01 | 2.72E-02 | 8.26E-01 | 4.29E-01 | 1.87E-01 | 3.06E-03 |
| 358.00446 | 19.81  | 15.35 | 15.51 | 15.73 | 16.31 | 1.12E-02 | 9.48E-01 | 5.34E-01 | 7.32E-03 | 8.66E-01 | 4.33E-02 | 2.27E-01 |
| 358.09376 | 20.56  | 17.65 | 17.29 | 16.97 | 16.59 | 1.75E-07 | 1.84E-01 | 7.43E-04 | 8.00E-08 | 2.75E-01 | 9.64E-04 | 1.56E-01 |
| 358.24137 | 178.11 | 20.42 | 20.38 | 20.40 | 19.89 | 2.71E-01 | 9.99E-01 | 1.00E+00 | 2.94E-01 | 1.00E+00 | 3.87E-01 | 3.60E-01 |
| 358.28363 | 268    | 21.78 | 21.02 | 21.58 | 21.32 | 4.76E-07 | 2.81E-07 | 4.72E-01 | 5.91E-03 | 2.86E-04 | 1.43E-01 | 2.40E-01 |
| 358.29711 | 236.34 | 18.75 | 18.29 | 18.51 | 18.79 | 4.75E-02 | 7.97E-02 | 5.85E-01 | 9.97E-01 | 6.75E-01 | 6.85E-02 | 5.08E-01 |
| 358.80012 | 87.31  | 18.62 | 19.39 | 19.47 | 19.09 | 1.07E-15 | 4.08E-12 | 6.75E-14 | 6.08E-05 | 8.85E-01 | 2.47E-02 | 2.35E-03 |
| 358.84373 | 16.86  | 14.17 | 9.27  | 9.81  | 10.63 | 3.76E-25 | 2.00E-14 | 4.22E-14 | 6.75E-13 | 6.14E-01 | 1.72E-02 | 2.74E-01 |
| 358.85984 | 99.58  | 17.46 | 15.30 | 15.80 | 15.89 | 2.78E-18 | 4.31E-14 | 1.22E-11 | 4.81E-10 | 1.27E-01 | 6.57E-02 | 9.84E-01 |
| 358.87832 | 138.51 | 10.18 | 17.44 | 9.62  | 9.31  | 8.39E-25 | 4.32E-14 | 8.68E-01 | 6.59E-01 | 4.09E-14 | 4.02E-14 | 9.78E-01 |
| 358.87858 | 53.91  | 20.22 | 19.28 | 18.60 | 19.35 | 1.33E-14 | 2.79E-06 | 4.29E-14 | 2.99E-05 | 2.09E-03 | 9.82E-01 | 7.24E-04 |
| 358.91252 | 32.04  | 10.83 | 13.80 | 13.99 | 11.64 | 2.07E-04 | 2.54E-03 | 9.99E-04 | 7.78E-01 | 9.96E-01 | 7.07E-02 | 3.88E-02 |
| 358.93693 | 41.17  | 14.93 | 16.41 | 16.28 | 16.61 | 1.26E-16 | 3.78E-12 | 1.28E-10 | 6.27E-14 | 9.18E-01 | 7.39E-01 | 3.51E-01 |
| 358.99546 | 41.41  | 16.21 | 14.39 | 13.96 | 15.06 | 4.80E-06 | 3.13E-04 | 3.91E-06 | 5.80E-02 | 7.85E-01 | 4.74E-01 | 8.61E-02 |
| 359.00353 | 18.52  | 13.92 | 15.37 | 15.20 | 15.84 | 4.98E-05 | 2.28E-03 | 8.95E-03 | 4.02E-05 | 9.74E-01 | 7.02E-01 | 4.35E-01 |
| 359.04953 | 19.31  | 14.05 | 16.65 | 17.27 | 17.22 | 2.38E-28 | 4.36E-14 | 1.02E-14 | 2.26E-14 | 1.32E-01 | 2.10E-01 | 9.99E-01 |
| 359.08625 | 21.85  | 15.37 | 15.45 | 12.79 | 13.13 | 2.40E-10 | 9.98E-01 | 3.04E-07 | 2.25E-05 | 3.14E-07 | 2.03E-05 | 8.99E-01 |
| 359.09353 | 31.38  | 16.34 | 14.63 | 14.67 | 14.91 | 1.54E-11 | 1.11E-09 | 1.90E-09 | 7.81E-07 | 9.99E-01 | 7.31E-01 | 8.09E-01 |
| 359.12572 | 16.99  | 15.30 | 17.52 | 17.48 | 17.76 | 2.51E-18 | 3.09E-13 | 4.28E-13 | 4.70E-14 | 9.99E-01 | 8.41E-01 | 7.71E-01 |
| 359.17631 | 209.72 | 15.41 | 13.68 | 13.98 | 15.10 | 4.68E-10 | 1.83E-08 | 3.21E-06 | 7.12E-01 | 7.24E-01 | 1.55E-05 | 8.92E-04 |
| 359.22043 | 213.56 | 18.21 | 16.19 | 16.69 | 17.70 | 4.00E-14 | 5.44E-13 | 3.59E-08 | 2.14E-01 | 2.16E-01 | 2.66E-07 | 9.57E-04 |
| 359.22349 | 39.89  | 17.73 | 16.61 | 16.75 | 17.86 | 2.26E-04 | 6.01E-03 | 1.98E-02 | 9.81E-01 | 9.78E-01 | 3.08E-03 | 1.02E-02 |
| 359.24584 | 281.9  | 10.89 | 16.31 | 15.73 | 10.58 | 3.86E-19 | 1.09E-12 | 1.12E-10 | 9.71E-01 | 8.45E-01 | 9.61E-13 | 7.96E-11 |
| 359.28054 | 268.97 | 18.53 | 17.64 | 17.85 | 17.68 | 9.03E-06 | 3.12E-05 | 2.50E-03 | 1.26E-04 | 6.82E-01 | 9.97E-01 | 8.13E-01 |
| 359.28691 | 269.22 | 17.74 | 17.08 | 17.72 | 17.48 | 6.59E-04 | 1.03E-03 | 1.00E+00 | 4.54E-01 | 1.96E-03 | 1.33E-01 | 5.31E-01 |
| 359.29628 | 286.51 | 23.86 | 23.35 | 23.78 | 23.54 | 1.88E-03 | 2.17E-03 | 9.40E-01 | 1.18E-01 | 1.69E-02 | 5.97E-01 | 3.56E-01 |
| 359.88386 | 34.54  | 16.49 | 16.20 | 15.79 | 16.65 | 1.28E-06 | 2.48E-01 | 5.40E-05 | 7.59E-01 | 5.05E-02 | 3.52E-02 | 1.98E-06 |
| 359.91839 | 37.48  | 18.30 | 18.04 | 18.42 | 17.55 | 5.22E-02 | 8.55E-01 | 9.80E-01 | 1.00E-01 | 6.55E-01 | 4.49E-01 | 4.55E-02 |
| 359.94879 | 29.69  | 13.38 | 15.27 | 15.27 | 14.66 | 3.65E-22 | 4.17E-14 | 4.31E-14 | 2.16E-09 | 1.00E+00 | 1.51E-02 | 1.33E-02 |
| 359.96979 | 33.81  | 11.39 | 13.56 | 14.24 | 11.57 | 4.20E-10 | 4.07E-05 | 2.78E-08 | 9.83E-01 | 4.94E-01 | 4.82E-04 | 9.39E-07 |
| 359.99081 | 33.97  | 14.97 | 14.20 | 14.66 | 14.58 | 5.01E-02 | 2.53E-02 | 6.69E-01 | 5.06E-01 | 3.36E-01 | 5.39E-01 | 9.91E-01 |
| 359.9992  | 30     | 14.79 | 13.58 | 15.14 | 16.01 | 1.24E-11 | 3.79E-04 | 6.29E-01 | 4.67E-04 | 3.40E-06 | 1.86E-12 | 2.78E-02 |
| 360.02561 | 18.14  | 12.99 | 15.52 | 13.79 | 15.12 | 1.14E-11 | 1.40E-10 | 1.11E-01 | 1.44E-07 | 2.56E-05 | 7.22E-01 | 2.72E-03 |
| 360.0473  | 28.87  | 15.45 | 14.83 | 14.82 | 15.07 | 2.01E-04 | 7.57E-04 | 4.92E-04 | 8.78E-02 | 1.00E+00 | 5.06E-01 | 4.54E-01 |
| 360.06074 | 27.9   | 15.85 | 16.12 | 16.03 | 15.91 | 2.94E-01 | 2.80E-01 | 6.20E-01 | 9.82E-01 | 9.39E-01 | 5.41E-01 | 8.62E-01 |
| 360.222   | 142.25 | 18.07 | 17.52 | 17.51 | 17.21 | 8.76E-03 | 1.21E-01 | 1.04E-01 | 4.95E-03 | 1.00E+00 | 6.46E-01 | 6.69E-01 |
| 360.22293 | 224.58 | 16.23 | 11.67 | 13.19 | 14.09 | 1.70E-20 | 3.31E-14 | 4.16E-11 | 1.03E-05 | 2.94E-03 | 8.73E-07 | 1.74E-01 |
| 360.23868 | 176    | 15.93 | 15.36 | 15.78 | 15.36 | 2.73E-03 | 1.02E-02 | 8.48E-01 | 1.46E-02 | 1.03E-01 | 1.00E+00 | 1.26E-01 |
| 360.25237 | 161.52 | 17.56 | 16.70 | 17.47 | 17.32 | 3.85E-06 | 4.38E-06 | 9.44E-01 | 4.97E-01 | 7.84E-05 | 3.52E-03 | 8.30E-01 |
| 360.29925 | 288.8  | 21.81 | 21.31 | 21.78 | 21.48 | 2.24E-03 | 4.96E-03 | 9.97E-01 | 1.32E-01 | 1.14E-02 | 7.08E-01 | 2.10E-01 |
| 360.79837 | 91.1   | 16.40 | 17.23 | 17.39 | 16.88 | 9.82E-17 | 1.03E-11 | 4.25E-14 | 2.15E-04 | 4.84E-01 | 1.60E-02 | 9.32E-05 |
| 360.80785 | 32.23  | 15.39 | 13.13 | 13.87 | 13.92 | 7.19E-08 | 2.28E-08 | 2.51E-04 | 7.26E-04 | 2.05E-01 | 1.82E-01 | 9.99E-01 |
| 360.81588 | 76.98  | 20.06 | 20.68 | 20.83 | 20.45 | 1.15E-14 | 4.83E-10 | 7.04E-14 | 2.19E-04 | 4.38E-01 | 8.31E-02 | 8.25E-04 |
| 360.87439 | 46.51  | 17.38 | 17.76 | 18.18 | 17.53 | 5.58E-10 | 7.28E-03 | 3.35E-10 | 5.91E-01 | 3.02E-03 | 2.50E-01 | 1.69E-06 |

|           |        |       |       |       |       |           |          |          |          |          |          |          |
|-----------|--------|-------|-------|-------|-------|-----------|----------|----------|----------|----------|----------|----------|
| 360.9308  | 43.21  | 14.67 | 15.62 | 14.99 | 15.10 | 1.02E-02  | 4.23E-03 | 6.54E-01 | 4.48E-01 | 1.21E-01 | 2.81E-01 | 9.84E-01 |
| 360.954   | 47.8   | 18.74 | 18.23 | 18.48 | 18.53 | 1.97E-01  | 1.29E-01 | 6.84E-01 | 8.18E-01 | 7.08E-01 | 6.11E-01 | 9.97E-01 |
| 360.97189 | 26.55  | 19.66 | 22.31 | 22.62 | 21.96 | 2.04E-55  | 5.11E-15 | 5.11E-15 | 5.11E-15 | 1.72E-01 | 1.23E-01 | 1.98E-04 |
| 361.01906 | 18.67  | 14.45 | 17.81 | 17.76 | 17.94 | 1.16E-29  | 2.11E-14 | 2.18E-14 | 1.71E-14 | 9.99E-01 | 9.74E-01 | 9.41E-01 |
| 361.04685 | 32.96  | 18.81 | 19.10 | 18.91 | 18.72 | 7.56E-03  | 4.07E-02 | 8.05E-01 | 8.32E-01 | 3.05E-01 | 5.21E-03 | 3.36E-01 |
| 361.05833 | 65.02  | 17.99 | 19.21 | 17.51 | 17.57 | 8.42E-80  | 5.11E-15 | 4.81E-13 | 3.46E-10 | 5.11E-15 | 5.11E-15 | 8.48E-01 |
| 361.07941 | 28.44  | 12.86 | 15.79 | 10.76 | 11.43 | 5.02E-112 | 5.11E-15 | 5.11E-15 | 6.00E-15 | 5.11E-15 | 5.11E-15 | 3.20E-07 |
| 361.10012 | 46.3   | 12.28 | 22.37 | 15.13 | 11.93 | 4.71E-71  | 5.11E-15 | 1.74E-10 | 8.47E-01 | 5.11E-15 | 5.11E-15 | 1.36E-11 |
| 361.17884 | 213.22 | 18.09 | 18.30 | 18.91 | 18.87 | 9.39E-13  | 3.25E-01 | 2.86E-10 | 7.10E-09 | 5.42E-06 | 4.84E-05 | 9.88E-01 |
| 361.18991 | 226.37 | 18.95 | 18.80 | 18.87 | 19.49 | 2.06E-11  | 3.94E-01 | 8.52E-01 | 1.87E-07 | 8.71E-01 | 1.16E-10 | 5.73E-09 |
| 361.22508 | 134.19 | 15.58 | 14.06 | 13.94 | 14.40 | 5.80E-08  | 2.31E-06 | 2.60E-07 | 5.91E-04 | 9.81E-01 | 6.82E-01 | 4.43E-01 |
| 361.23683 | 245.35 | 21.74 | 20.85 | 21.07 | 21.34 | 5.96E-22  | 3.02E-14 | 1.13E-13 | 2.63E-05 | 4.48E-02 | 1.75E-07 | 7.63E-03 |
| 361.23918 | 39.27  | 17.21 | 15.34 | 15.68 | 16.01 | 9.87E-05  | 8.71E-05 | 1.76E-03 | 3.15E-02 | 8.61E-01 | 4.31E-01 | 8.72E-01 |
| 361.26022 | 224.63 | 17.78 | 16.69 | 16.05 | 16.72 | 1.12E-13  | 1.35E-06 | 5.86E-14 | 5.53E-06 | 1.38E-02 | 9.99E-01 | 1.07E-02 |
| 361.30258 | 292.67 | 18.59 | 17.66 | 18.36 | 18.10 | 2.30E-06  | 9.40E-07 | 5.28E-01 | 3.09E-02 | 5.15E-04 | 7.20E-02 | 4.82E-01 |
| 361.81934 | 89.22  | 13.80 | 13.71 | 14.31 | 13.49 | 4.32E-04  | 9.54E-01 | 3.54E-02 | 3.53E-01 | 1.00E-02 | 6.83E-01 | 2.32E-04 |
| 361.88171 | 27.29  | 15.54 | 15.15 | 14.86 | 15.86 | 4.66E-03  | 4.95E-01 | 6.86E-02 | 6.78E-01 | 7.44E-01 | 7.55E-02 | 3.99E-03 |
| 361.94911 | 36.66  | 15.84 | 15.96 | 16.51 | 15.85 | 1.54E-02  | 9.54E-01 | 2.03E-02 | 1.00E+00 | 9.67E-02 | 9.71E-01 | 3.61E-02 |
| 362.05189 | 20.48  | 21.40 | 24.40 | 24.04 | 23.22 | 1.57E-34  | 5.11E-15 | 5.33E-15 | 9.10E-14 | 3.56E-01 | 2.01E-06 | 1.53E-03 |
| 362.1037  | 56.29  | 13.76 | 19.25 | 12.78 | 12.39 | 4.24E-88  | 5.11E-15 | 4.59E-05 | 1.72E-08 | 5.11E-15 | 5.11E-15 | 3.07E-01 |
| 362.18243 | 213.88 | 15.46 | 15.42 | 15.90 | 15.93 | 3.97E-03  | 9.95E-01 | 5.58E-02 | 4.71E-02 | 3.66E-02 | 3.10E-02 | 9.99E-01 |
| 362.2378  | 169.09 | 21.12 | 20.76 | 20.87 | 20.29 | 1.02E-05  | 9.55E-02 | 3.54E-01 | 2.23E-06 | 9.05E-01 | 2.16E-02 | 2.37E-03 |
| 362.24008 | 239.98 | 19.11 | 18.02 | 18.24 | 18.53 | 5.29E-20  | 4.13E-14 | 1.45E-13 | 2.38E-06 | 1.92E-01 | 4.69E-05 | 4.11E-02 |
| 362.2838  | 266.54 | 17.29 | 17.01 | 17.09 | 18.16 | 9.31E-03  | 8.56E-01 | 9.37E-01 | 7.51E-02 | 9.97E-01 | 1.11E-02 | 1.93E-02 |
| 362.81402 | 81.44  | 17.59 | 18.37 | 18.63 | 18.08 | 1.59E-22  | 1.06E-13 | 2.24E-14 | 3.90E-06 | 3.57E-02 | 2.18E-02 | 4.55E-07 |
| 362.84651 | 96.96  | 12.96 | 14.41 | 14.42 | 14.93 | 2.55E-06  | 6.44E-04 | 5.43E-04 | 2.80E-06 | 1.00E+00 | 5.50E-01 | 5.47E-01 |
| 362.86855 | 43.96  | 15.07 | 14.98 | 15.75 | 14.36 | 9.89E-09  | 9.76E-01 | 3.45E-03 | 3.31E-03 | 1.17E-03 | 1.59E-02 | 9.95E-10 |
| 362.88811 | 35.97  | 16.99 | 16.95 | 17.42 | 17.02 | 4.14E-01  | 1.00E+00 | 4.89E-01 | 1.00E+00 | 4.50E-01 | 9.97E-01 | 6.00E-01 |
| 362.89179 | 154.43 | 17.02 | 14.48 | 14.14 | 15.56 | 3.57E-33  | 7.55E-15 | 5.11E-15 | 8.84E-10 | 3.93E-01 | 1.45E-05 | 4.91E-09 |
| 362.91225 | 50.2   | 21.23 | 21.48 | 21.67 | 21.76 | 5.41E-08  | 2.51E-02 | 6.75E-06 | 1.28E-07 | 1.64E-01 | 1.78E-02 | 7.72E-01 |
| 362.93    | 18.49  | 15.86 | 22.07 | 21.86 | 20.69 | 7.26E-43  | 5.11E-15 | 5.11E-15 | 7.77E-15 | 9.58E-01 | 6.04E-03 | 2.52E-02 |
| 362.97441 | 17.34  | 15.62 | 17.16 | 17.60 | 17.22 | 1.01E-18  | 1.58E-11 | 4.33E-14 | 8.60E-12 | 1.64E-01 | 9.92E-01 | 3.05E-01 |
| 363.00964 | 62.6   | 14.13 | 12.57 | 14.85 | 15.85 | 1.09E-18  | 5.10E-06 | 9.36E-02 | 8.79E-07 | 4.71E-11 | 4.11E-14 | 1.10E-02 |
| 363.03502 | 17.7   | 15.32 | 17.16 | 17.16 | 17.12 | 2.52E-24  | 4.45E-14 | 4.17E-14 | 4.31E-14 | 1.00E+00 | 9.98E-01 | 9.98E-01 |
| 363.04882 | 17.87  | 14.05 | 16.59 | 15.99 | 15.35 | 2.11E-16  | 4.29E-14 | 1.28E-10 | 5.20E-05 | 1.52E-01 | 1.85E-04 | 1.20E-01 |
| 363.13369 | 25.21  | 13.78 | 14.62 | 14.36 | 13.65 | 1.70E-03  | 1.30E-02 | 1.49E-01 | 9.63E-01 | 7.81E-01 | 4.80E-03 | 6.55E-02 |
| 363.1585  | 40.6   | 16.69 | 14.62 | 15.48 | 16.50 | 1.00E-09  | 5.43E-09 | 1.12E-03 | 9.41E-01 | 4.88E-02 | 5.74E-07 | 1.45E-02 |
| 363.19519 | 244.3  | 20.88 | 21.23 | 21.54 | 21.42 | 2.39E-19  | 2.13E-06 | 4.34E-14 | 7.74E-13 | 4.71E-05 | 3.52E-02 | 3.17E-01 |
| 363.21431 | 217.79 | 20.25 | 18.88 | 19.51 | 20.21 | 2.20E-31  | 5.11E-15 | 1.45E-10 | 9.87E-01 | 1.98E-07 | 9.33E-15 | 7.87E-09 |
| 363.23175 | 228    | 16.83 | 15.12 | 14.49 | 16.03 | 1.57E-09  | 1.77E-05 | 1.59E-09 | 1.29E-01 | 3.10E-01 | 7.70E-02 | 3.05E-04 |
| 363.24075 | 169.2  | 18.67 | 18.19 | 18.35 | 17.75 | 1.13E-06  | 1.34E-02 | 1.68E-01 | 2.15E-07 | 7.55E-01 | 4.15E-02 | 1.86E-03 |
| 363.25232 | 267.05 | 21.74 | 21.27 | 21.43 | 21.83 | 2.19E-08  | 8.29E-06 | 6.03E-03 | 7.68E-01 | 3.52E-01 | 3.03E-07 | 3.64E-04 |
| 363.25452 | 48.79  | 15.39 | 12.82 | 13.02 | 14.02 | 1.53E-07  | 6.74E-07 | 4.02E-06 | 2.43E-02 | 9.77E-01 | 7.56E-02 | 1.74E-01 |
| 363.91576 | 48.63  | 16.82 | 17.00 | 17.35 | 17.36 | 4.78E-07  | 3.24E-01 | 1.00E-05 | 1.20E-05 | 1.14E-02 | 1.05E-02 | 9.99E-01 |
| 363.92621 | 25.68  | 17.73 | 18.52 | 18.63 | 18.89 | 1.59E-10  | 1.43E-05 | 4.19E-07 | 3.19E-10 | 9.08E-01 | 1.48E-01 | 4.46E-01 |



|           |        |       |       |       |       |          |          |          |          |          |          |          |
|-----------|--------|-------|-------|-------|-------|----------|----------|----------|----------|----------|----------|----------|
| 363.93363 | 17.97  | 14.84 | 16.52 | 16.33 | 15.73 | 4.60E-18 | 4.22E-14 | 1.45E-13 | 2.39E-05 | 7.10E-01 | 2.67E-04 | 9.90E-03 |
| 364.03995 | 27.33  | 15.27 | 17.51 | 17.82 | 16.53 | 1.11E-43 | 5.11E-15 | 5.11E-15 | 5.32E-13 | 1.89E-01 | 2.95E-08 | 2.72E-13 |
| 364.05669 | 18.13  | 14.54 | 17.63 | 16.93 | 15.98 | 4.47E-17 | 4.24E-14 | 3.89E-11 | 2.22E-04 | 1.68E-01 | 2.40E-05 | 3.21E-02 |
| 364.06761 | 22.71  | 14.76 | 17.31 | 17.15 | 16.39 | 4.08E-18 | 4.26E-14 | 5.42E-14 | 3.12E-07 | 9.50E-01 | 1.21E-02 | 4.99E-02 |
| 364.13082 | 25.42  | 14.63 | 14.86 | 15.18 | 14.49 | 5.29E-02 | 7.97E-01 | 1.26E-01 | 9.53E-01 | 6.02E-01 | 5.16E-01 | 4.89E-02 |
| 364.19837 | 240.11 | 17.98 | 18.45 | 18.83 | 18.58 | 1.05E-16 | 3.63E-06 | 4.15E-14 | 3.24E-09 | 2.47E-04 | 4.71E-01 | 4.67E-02 |
| 364.21391 | 227.68 | 17.78 | 16.11 | 16.89 | 17.77 | 1.78E-35 | 5.11E-15 | 1.52E-11 | 1.00E+00 | 6.55E-09 | 5.11E-15 | 2.09E-10 |
| 364.21884 | 72.8   | 15.31 | 12.04 | 13.94 | 15.51 | 2.59E-20 | 4.26E-14 | 5.10E-04 | 9.45E-01 | 1.05E-06 | 4.35E-14 | 1.33E-04 |
| 364.23341 | 161.86 | 16.45 | 15.78 | 15.90 | 15.48 | 7.49E-10 | 9.99E-06 | 3.65E-04 | 2.78E-10 | 8.24E-01 | 1.65E-01 | 1.93E-02 |
| 364.24412 | 162.12 | 14.96 | 13.98 | 14.06 | 13.63 | 8.31E-10 | 4.34E-06 | 2.55E-05 | 8.52E-10 | 9.75E-01 | 3.18E-01 | 1.43E-01 |
| 364.25548 | 267.24 | 18.78 | 18.25 | 18.25 | 18.94 | 4.93E-06 | 4.06E-03 | 3.54E-03 | 7.49E-01 | 1.00E+00 | 2.08E-04 | 1.74E-04 |
| 364.80506 | 83.3   | 16.76 | 16.13 | 16.61 | 16.38 | 1.42E-09 | 1.10E-09 | 3.49E-01 | 6.04E-04 | 8.91E-06 | 6.31E-02 | 9.96E-02 |
| 364.8341  | 93.42  | 13.29 | 11.11 | 12.79 | 11.59 | 4.51E-04 | 7.75E-04 | 8.08E-01 | 1.87E-02 | 1.90E-02 | 8.45E-01 | 1.77E-01 |
| 364.84961 | 63.58  | 19.05 | 18.67 | 19.66 | 19.49 | 9.80E-19 | 1.35E-03 | 3.84E-08 | 1.84E-04 | 4.46E-14 | 3.22E-12 | 4.08E-01 |
| 364.87034 | 47.05  | 22.72 | 23.46 | 24.08 | 23.88 | 2.26E-42 | 4.34E-14 | 5.11E-15 | 5.11E-15 | 1.03E-11 | 1.35E-05 | 7.92E-02 |
| 364.88303 | 34.92  | 15.50 | 17.62 | 18.17 | 16.30 | 7.84E-50 | 5.11E-15 | 5.11E-15 | 1.17E-06 | 1.39E-03 | 5.02E-14 | 5.77E-15 |
| 364.88909 | 60.96  | 15.04 | 13.43 | 14.81 | 14.72 | 1.15E-13 | 4.53E-13 | 6.61E-01 | 4.28E-01 | 8.60E-10 | 2.66E-08 | 9.78E-01 |
| 364.90941 | 42.48  | 18.16 | 18.45 | 18.75 | 18.91 | 9.24E-15 | 6.36E-03 | 8.92E-10 | 1.07E-13 | 6.06E-03 | 8.39E-06 | 2.87E-01 |
| 364.93414 | 18.79  | 14.57 | 15.96 | 15.69 | 15.25 | 7.82E-09 | 9.59E-09 | 4.00E-06 | 1.60E-02 | 6.24E-01 | 1.33E-02 | 2.28E-01 |
| 364.94784 | 23.87  | 15.29 | 16.98 | 17.42 | 17.89 | 4.71E-17 | 4.09E-08 | 3.10E-12 | 4.25E-14 | 4.11E-01 | 1.24E-02 | 3.82E-01 |
| 364.99879 | 29.47  | 15.99 | 15.62 | 15.75 | 15.71 | 4.07E-01 | 3.61E-01 | 7.08E-01 | 6.22E-01 | 9.42E-01 | 9.82E-01 | 9.98E-01 |
| 365.03414 | 30.39  | 17.37 | 17.75 | 18.11 | 17.99 | 7.63E-04 | 2.00E-01 | 5.93E-04 | 9.77E-03 | 2.30E-01 | 6.29E-01 | 9.16E-01 |
| 365.05152 | 19.36  | 18.24 | 18.82 | 19.28 | 19.40 | 5.11E-12 | 1.90E-03 | 2.06E-09 | 8.99E-11 | 2.70E-02 | 3.43E-03 | 8.74E-01 |
| 365.1212  | 179.24 | 14.11 | 13.14 | 13.50 | 12.35 | 1.80E-13 | 1.94E-05 | 1.33E-02 | 6.93E-14 | 3.20E-01 | 1.58E-03 | 1.06E-06 |
| 365.1382  | 27.82  | 17.86 | 18.05 | 17.65 | 17.71 | 1.86E-03 | 3.00E-01 | 1.79E-01 | 5.16E-01 | 1.60E-03 | 1.59E-02 | 9.39E-01 |
| 365.20889 | 253.04 | 19.78 | 20.53 | 20.75 | 20.84 | 2.49E-12 | 2.56E-06 | 6.27E-10 | 8.99E-11 | 4.50E-01 | 1.96E-01 | 9.44E-01 |
| 365.22935 | 239.57 | 19.27 | 18.27 | 18.62 | 19.15 | 6.03E-17 | 4.60E-14 | 1.66E-07 | 7.58E-01 | 1.68E-02 | 2.54E-11 | 6.75E-05 |
| 365.24694 | 249.93 | 19.13 | 18.39 | 18.16 | 18.79 | 1.82E-09 | 9.66E-06 | 2.60E-09 | 1.25E-01 | 4.30E-01 | 5.86E-02 | 4.51E-04 |
| 365.26761 | 299.14 | 17.38 | 18.76 | 19.34 | 18.88 | 6.18E-12 | 1.66E-06 | 6.07E-12 | 3.44E-07 | 1.39E-01 | 9.71E-01 | 3.49E-01 |
| 365.85296 | 67.81  | 13.68 | 11.22 | 14.27 | 13.94 | 7.05E-31 | 3.46E-14 | 4.86E-02 | 7.08E-01 | 5.11E-15 | 2.22E-14 | 4.93E-01 |
| 365.87385 | 46.63  | 18.31 | 18.93 | 19.72 | 19.50 | 4.28E-40 | 2.08E-10 | 5.11E-15 | 5.11E-15 | 5.12E-14 | 3.89E-08 | 8.97E-02 |
| 365.88413 | 32.95  | 15.96 | 14.02 | 14.00 | 15.32 | 1.52E-07 | 5.71E-06 | 3.51E-06 | 3.61E-01 | 1.00E+00 | 8.81E-03 | 6.82E-03 |
| 365.95675 | 32.86  | 15.99 | 18.68 | 18.87 | 17.97 | 5.99E-40 | 5.11E-15 | 5.11E-15 | 4.15E-14 | 7.68E-01 | 2.47E-03 | 5.41E-05 |
| 366.03138 | 46.07  | 16.22 | 18.10 | 18.64 | 17.63 | 4.61E-24 | 4.37E-14 | 1.24E-14 | 2.44E-09 | 6.15E-02 | 1.53E-01 | 4.71E-05 |
| 366.0548  | 24.85  | 15.29 | 13.82 | 14.91 | 15.42 | 2.57E-05 | 1.20E-04 | 6.68E-01 | 9.83E-01 | 9.57E-03 | 6.92E-05 | 4.78E-01 |
| 366.15122 | 25.61  | 16.66 | 15.91 | 16.08 | 15.92 | 6.95E-08 | 7.54E-07 | 1.72E-04 | 1.91E-06 | 6.21E-01 | 1.00E+00 | 6.71E-01 |
| 366.21353 | 261.86 | 17.39 | 17.89 | 18.06 | 18.08 | 3.60E-02 | 2.31E-01 | 5.46E-02 | 5.85E-02 | 9.26E-01 | 9.13E-01 | 1.00E+00 |
| 366.271   | 299.55 | 15.60 | 16.13 | 16.73 | 16.36 | 2.47E-07 | 3.10E-02 | 5.62E-08 | 9.05E-04 | 1.22E-02 | 6.80E-01 | 2.38E-01 |
| 366.76093 | 92.78  | 14.01 | 14.04 | 14.26 | 14.34 | 9.34E-02 | 9.96E-01 | 3.31E-01 | 1.40E-01 | 4.87E-01 | 2.39E-01 | 9.57E-01 |
| 366.82153 | 86.4   | 15.79 | 14.72 | 15.44 | 15.40 | 1.18E-18 | 4.13E-14 | 4.72E-03 | 1.75E-03 | 5.71E-10 | 1.73E-08 | 9.79E-01 |
| 366.82883 | 57.92  | 18.31 | 18.61 | 19.48 | 19.09 | 4.68E-22 | 3.79E-02 | 3.40E-14 | 3.16E-10 | 1.10E-12 | 2.60E-04 | 3.59E-03 |
| 366.84458 | 157.78 | 14.58 | 16.16 | 10.24 | 13.12 | 7.87E-16 | 6.70E-02 | 4.82E-10 | 1.23E-01 | 4.29E-14 | 6.54E-05 | 1.50E-04 |
| 366.86846 | 54.08  | 20.28 | 21.02 | 21.71 | 21.51 | 1.86E-38 | 4.98E-13 | 5.11E-15 | 5.11E-15 | 4.40E-11 | 7.61E-06 | 1.76E-01 |
| 366.87492 | 36.16  | 15.45 | 15.97 | 16.30 | 16.18 | 3.52E-07 | 5.06E-03 | 4.29E-07 | 3.59E-05 | 1.50E-01 | 5.48E-01 | 8.84E-01 |
| 366.92    | 27.36  | 14.73 | 13.57 | 14.53 | 13.66 | 1.61E-05 | 1.91E-04 | 8.82E-01 | 1.11E-03 | 3.86E-03 | 9.87E-01 | 1.49E-02 |

|           |        |       |       |       |       |          |          |          |          |          |          |          |
|-----------|--------|-------|-------|-------|-------|----------|----------|----------|----------|----------|----------|----------|
| 366.94085 | 31.57  | 14.33 | 15.63 | 16.11 | 15.38 | 8.52E-17 | 5.02E-10 | 4.33E-14 | 1.26E-06 | 6.64E-02 | 5.90E-01 | 1.63E-03 |
| 366.95014 | 30.08  | 13.51 | 14.63 | 14.78 | 14.35 | 3.26E-06 | 8.70E-05 | 5.19E-06 | 7.81E-03 | 9.40E-01 | 7.14E-01 | 3.64E-01 |
| 366.96115 | 30.32  | 13.88 | 15.03 | 14.50 | 14.94 | 2.73E-02 | 3.09E-02 | 4.29E-01 | 6.43E-02 | 6.02E-01 | 9.97E-01 | 7.46E-01 |
| 366.97246 | 67.78  | 12.91 | 14.62 | 15.71 | 16.17 | 1.38E-22 | 2.47E-07 | 4.36E-14 | 3.74E-14 | 2.52E-03 | 1.10E-05 | 4.60E-01 |
| 367.04528 | 66.14  | 13.52 | 14.87 | 11.45 | 12.14 | 1.83E-48 | 1.05E-11 | 1.20E-14 | 1.17E-11 | 5.11E-15 | 5.11E-15 | 1.59E-03 |
| 367.05392 | 21.68  | 16.42 | 19.82 | 19.35 | 18.97 | 1.72E-40 | 5.11E-15 | 5.11E-15 | 1.42E-14 | 1.51E-01 | 1.37E-03 | 3.27E-01 |
| 367.12863 | 65.59  | 11.63 | 15.67 | 9.85  | 10.39 | 5.15E-98 | 5.11E-15 | 1.89E-14 | 3.47E-12 | 5.11E-15 | 5.11E-15 | 8.16E-03 |
| 367.14826 | 25.17  | 17.44 | 17.09 | 16.80 | 16.28 | 3.19E-05 | 4.25E-01 | 2.77E-02 | 1.10E-05 | 6.07E-01 | 5.72E-03 | 1.41E-01 |
| 367.17353 | 189.02 | 15.01 | 14.04 | 15.31 | 13.76 | 3.72E-14 | 1.34E-05 | 4.10E-01 | 3.32E-08 | 1.17E-08 | 5.64E-01 | 1.51E-11 |
| 367.21551 | 173.38 | 16.89 | 16.95 | 15.81 | 17.47 | 1.00E-08 | 9.95E-01 | 8.10E-05 | 1.03E-01 | 4.95E-05 | 1.94E-01 | 3.99E-09 |
| 367.22651 | 299.58 | 14.47 | 17.28 | 17.95 | 17.14 | 4.48E-23 | 4.49E-14 | 2.82E-14 | 2.43E-13 | 1.67E-01 | 9.76E-01 | 7.40E-02 |
| 367.2304  | 179.96 | 16.51 | 17.04 | 16.37 | 17.19 | 5.08E-06 | 1.26E-02 | 8.48E-01 | 9.56E-04 | 1.05E-03 | 8.49E-01 | 5.73E-05 |
| 367.24403 | 257.91 | 19.51 | 18.34 | 18.57 | 18.90 | 3.91E-13 | 8.20E-13 | 4.06E-09 | 4.27E-04 | 4.53E-01 | 2.53E-03 | 1.40E-01 |
| 367.24989 | 184.84 | 15.35 | 14.33 | 15.54 | 14.68 | 2.94E-06 | 2.28E-04 | 8.69E-01 | 3.70E-02 | 1.32E-05 | 5.32E-01 | 4.74E-03 |
| 367.28585 | 185.85 | 15.79 | 15.06 | 15.71 | 15.92 | 7.31E-08 | 3.78E-06 | 9.32E-01 | 8.24E-01 | 8.23E-05 | 2.27E-07 | 4.91E-01 |
| 367.35854 | 278.14 | 20.17 | 18.51 | 18.71 | 19.57 | 1.32E-19 | 4.31E-14 | 7.61E-14 | 5.43E-03 | 6.89E-01 | 2.15E-07 | 2.89E-05 |
| 367.87166 | 53.93  | 15.59 | 15.91 | 16.67 | 16.43 | 6.03E-25 | 6.05E-03 | 1.71E-14 | 5.55E-14 | 1.37E-12 | 2.76E-06 | 8.30E-02 |
| 367.96555 | 41.16  | 17.32 | 18.51 | 18.31 | 17.65 | 3.85E-13 | 1.30E-11 | 1.16E-08 | 1.84E-01 | 6.18E-01 | 4.44E-06 | 5.98E-04 |
| 367.96967 | 63.47  | 15.04 | 16.88 | 17.61 | 17.44 | 3.34E-33 | 4.24E-14 | 5.11E-15 | 6.22E-15 | 1.31E-03 | 3.08E-02 | 8.25E-01 |
| 367.98268 | 67.31  | 13.27 | 12.83 | 14.19 | 14.66 | 5.69E-07 | 5.51E-01 | 2.81E-02 | 3.38E-04 | 4.71E-04 | 2.25E-06 | 5.21E-01 |
| 368.07806 | 24.32  | 19.78 | 20.17 | 20.37 | 20.18 | 1.64E-03 | 5.49E-02 | 7.26E-04 | 5.80E-02 | 5.72E-01 | 1.00E+00 | 6.19E-01 |
| 368.21851 | 165.35 | 13.48 | 13.61 | 11.60 | 14.38 | 6.27E-07 | 9.92E-01 | 5.09E-04 | 2.46E-01 | 2.73E-04 | 4.09E-01 | 3.53E-07 |
| 368.22969 | 297.54 | 13.01 | 13.64 | 14.88 | 13.64 | 7.25E-15 | 1.81E-02 | 4.35E-14 | 2.27E-02 | 1.39E-07 | 1.00E+00 | 2.85E-07 |
| 368.23443 | 171.93 | 13.65 | 13.93 | 12.71 | 14.34 | 5.67E-07 | 7.54E-01 | 3.72E-03 | 7.52E-02 | 1.36E-04 | 4.89E-01 | 2.98E-07 |
| 368.26326 | 218.09 | 16.57 | 14.30 | 16.18 | 15.88 | 5.92E-10 | 4.40E-10 | 6.26E-01 | 1.77E-01 | 5.02E-07 | 6.23E-05 | 8.25E-01 |
| 368.28093 | 229.03 | 17.76 | 17.43 | 17.83 | 17.39 | 3.50E-02 | 2.54E-01 | 9.75E-01 | 1.90E-01 | 1.22E-01 | 9.97E-01 | 8.81E-02 |
| 368.28116 | 168.91 | 14.82 | 13.20 | 13.86 | 13.80 | 2.33E-22 | 1.51E-14 | 4.72E-10 | 1.30E-10 | 4.13E-05 | 4.85E-04 | 9.70E-01 |
| 368.31742 | 187.08 | 14.75 | 13.82 | 14.13 | 14.30 | 6.00E-06 | 1.74E-06 | 2.48E-03 | 6.73E-02 | 3.14E-01 | 4.69E-02 | 7.76E-01 |
| 368.36187 | 284.41 | 17.04 | 17.53 | 17.30 | 16.69 | 1.50E-01 | 5.17E-01 | 8.85E-01 | 7.78E-01 | 9.20E-01 | 1.19E-01 | 3.67E-01 |
| 368.82658 | 71.66  | 16.22 | 16.22 | 17.40 | 16.94 | 4.32E-22 | 1.00E+00 | 4.26E-14 | 1.20E-07 | 4.45E-14 | 2.54E-07 | 2.46E-03 |
| 368.83659 | 151.81 | 15.13 | 11.89 | 13.81 | 14.86 | 9.39E-18 | 4.15E-14 | 9.07E-04 | 8.69E-01 | 9.71E-07 | 2.76E-13 | 2.21E-02 |
| 368.84668 | 77.76  | 15.13 | 14.21 | 15.81 | 15.89 | 1.24E-31 | 2.02E-11 | 7.33E-07 | 9.89E-08 | 5.33E-15 | 5.33E-15 | 9.40E-01 |
| 368.85724 | 70.86  | 15.12 | 11.03 | 13.45 | 14.28 | 1.75E-18 | 4.22E-14 | 3.12E-04 | 1.97E-01 | 1.52E-07 | 7.87E-12 | 2.09E-01 |
| 368.86537 | 53.45  | 16.56 | 16.25 | 17.26 | 17.09 | 3.17E-21 | 1.15E-02 | 5.99E-11 | 2.24E-06 | 4.35E-14 | 3.74E-13 | 3.42E-01 |
| 368.87242 | 29.19  | 8.65  | 9.55  | 14.23 | 12.62 | 5.58E-15 | 5.69E-01 | 2.35E-13 | 4.24E-07 | 1.57E-09 | 2.24E-04 | 1.20E-01 |
| 368.87814 | 58.61  | 16.46 | 14.54 | 14.97 | 15.04 | 4.12E-18 | 4.42E-14 | 1.19E-11 | 4.05E-10 | 1.56E-01 | 8.78E-02 | 9.87E-01 |
| 368.91994 | 45.71  | 14.22 | 13.88 | 14.33 | 13.79 | 5.85E-01 | 8.68E-01 | 9.95E-01 | 7.70E-01 | 7.54E-01 | 9.97E-01 | 6.42E-01 |
| 368.94108 | 39.95  | 17.27 | 18.41 | 17.95 | 18.27 | 1.79E-06 | 2.81E-06 | 9.87E-03 | 7.36E-05 | 1.81E-01 | 9.40E-01 | 5.02E-01 |
| 368.98232 | 37.08  | 17.93 | 18.78 | 18.99 | 18.88 | 2.16E-36 | 1.44E-14 | 5.11E-15 | 5.77E-15 | 3.46E-02 | 6.41E-01 | 4.56E-01 |
| 369.00024 | 16.72  | 18.58 | 21.45 | 21.62 | 21.30 | 1.72E-31 | 1.07E-14 | 5.33E-15 | 3.33E-14 | 8.99E-01 | 9.41E-01 | 5.94E-01 |
| 369.02265 | 23.52  | 16.35 | 19.38 | 19.54 | 18.72 | 7.57E-26 | 3.86E-14 | 2.04E-14 | 2.98E-13 | 9.52E-01 | 1.29E-01 | 3.47E-02 |
| 369.04447 | 19.52  | 9.77  | 12.66 | 9.70  | 11.96 | 3.01E-07 | 1.60E-05 | 9.99E-01 | 2.64E-03 | 1.47E-05 | 6.81E-01 | 2.26E-03 |
| 369.08143 | 24.38  | 16.27 | 16.42 | 16.70 | 16.73 | 1.92E-02 | 8.15E-01 | 4.79E-02 | 4.03E-02 | 3.44E-01 | 2.94E-01 | 9.99E-01 |
| 369.2051  | 206.87 | 20.01 | 20.18 | 20.44 | 20.49 | 5.00E-03 | 6.44E-01 | 1.91E-02 | 9.56E-03 | 3.26E-01 | 2.05E-01 | 9.88E-01 |
| 369.2206  | 136.19 | 17.25 | 18.35 | 18.74 | 17.31 | 1.42E-12 | 6.02E-06 | 3.42E-10 | 9.95E-01 | 2.95E-01 | 5.43E-05 | 9.74E-09 |

|           |        |       |       |       |       |           |          |          |          |          |          |          |
|-----------|--------|-------|-------|-------|-------|-----------|----------|----------|----------|----------|----------|----------|
| 369.22891 | 20.27  | 21.61 | 20.29 | 20.86 | 22.01 | 8.44E-11  | 5.30E-07 | 9.42E-03 | 3.50E-01 | 9.07E-02 | 4.24E-10 | 3.79E-05 |
| 369.23854 | 260.53 | 16.98 | 16.61 | 16.29 | 16.22 | 7.87E-02  | 6.54E-01 | 1.29E-01 | 9.75E-02 | 7.54E-01 | 6.56E-01 | 9.97E-01 |
| 369.24775 | 214.93 | 16.95 | 14.48 | 13.64 | 15.23 | 7.97E-19  | 1.32E-11 | 4.30E-14 | 5.48E-06 | 6.85E-02 | 1.43E-01 | 4.90E-05 |
| 369.26649 | 214    | 16.50 | 15.90 | 16.99 | 15.31 | 1.56E-04  | 3.57E-01 | 5.45E-01 | 9.45E-03 | 2.12E-02 | 4.25E-01 | 1.14E-04 |
| 369.28413 | 224.22 | 14.89 | 13.96 | 15.16 | 14.86 | 2.67E-02  | 9.97E-02 | 9.04E-01 | 1.00E+00 | 1.99E-02 | 1.49E-01 | 8.93E-01 |
| 369.3014  | 294.57 | 16.55 | 18.27 | 18.55 | 18.13 | 3.96E-33  | 1.20E-14 | 5.11E-15 | 4.02E-14 | 2.41E-01 | 8.17E-01 | 3.58E-02 |
| 369.59103 | 18.35  | 16.59 | 20.90 | 21.31 | 21.50 | 2.91E-53  | 5.11E-15 | 5.11E-15 | 5.11E-15 | 4.35E-01 | 1.55E-01 | 9.14E-01 |
| 369.91306 | 29.25  | 14.07 | 14.50 | 14.26 | 14.40 | 5.83E-01  | 5.41E-01 | 9.30E-01 | 7.59E-01 | 8.88E-01 | 9.90E-01 | 9.80E-01 |
| 369.96765 | 78.7   | 9.29  | 14.40 | 14.45 | 13.37 | 7.99E-29  | 1.27E-14 | 9.55E-15 | 4.31E-14 | 1.00E+00 | 1.18E-01 | 9.02E-02 |
| 369.98339 | 45.45  | 15.24 | 15.25 | 17.05 | 17.02 | 3.59E-21  | 1.00E+00 | 9.94E-14 | 8.34E-13 | 3.84E-13 | 4.05E-12 | 9.99E-01 |
| 370.02601 | 28.45  | 10.98 | 14.64 | 15.02 | 14.35 | 1.24E-17  | 5.40E-13 | 4.26E-14 | 7.52E-11 | 8.51E-01 | 9.31E-01 | 5.03E-01 |
| 370.0906  | 23.68  | 18.65 | 20.06 | 20.34 | 20.27 | 8.88E-26  | 4.26E-14 | 2.60E-14 | 4.22E-14 | 2.86E-01 | 5.65E-01 | 9.74E-01 |
| 370.15727 | 32.11  | 14.80 | 14.19 | 13.18 | 13.69 | 2.01E-03  | 4.96E-01 | 1.05E-03 | 6.13E-02 | 9.77E-02 | 6.86E-01 | 6.64E-01 |
| 370.2083  | 206.97 | 17.57 | 17.79 | 18.11 | 18.09 | 1.04E-02  | 6.27E-01 | 1.77E-02 | 2.98E-02 | 3.27E-01 | 4.00E-01 | 1.00E+00 |
| 370.2239  | 141.57 | 14.69 | 15.25 | 15.94 | 14.50 | 7.98E-07  | 1.56E-01 | 1.88E-05 | 8.92E-01 | 5.06E-02 | 3.90E-02 | 2.38E-06 |
| 370.23272 | 23.31  | 19.14 | 17.53 | 18.32 | 19.59 | 5.07E-11  | 1.59E-07 | 1.72E-02 | 4.05E-01 | 3.08E-02 | 1.98E-10 | 1.25E-04 |
| 370.29686 | 231.76 | 17.54 | 18.46 | 18.86 | 17.88 | 1.62E-07  | 6.54E-04 | 1.95E-07 | 4.97E-01 | 3.19E-01 | 8.85E-02 | 4.13E-04 |
| 370.81562 | 57.16  | 16.50 | 14.99 | 16.05 | 16.18 | 1.82E-15  | 4.40E-14 | 4.09E-02 | 2.46E-01 | 1.90E-08 | 1.29E-09 | 8.99E-01 |
| 370.82663 | 52.96  | 16.18 | 16.44 | 17.66 | 16.96 | 7.98E-47  | 6.33E-03 | 5.11E-15 | 4.31E-14 | 5.11E-15 | 5.09E-08 | 1.71E-13 |
| 370.83615 | 48.91  | 20.30 | 19.32 | 19.35 | 19.91 | 6.19E-14  | 1.47E-11 | 3.87E-11 | 2.30E-02 | 9.96E-01 | 1.88E-04 | 3.92E-04 |
| 370.85625 | 97.08  | 13.27 | 14.87 | 15.36 | 14.99 | 2.69E-19  | 1.46E-11 | 4.32E-14 | 1.72E-12 | 1.19E-01 | 9.52E-01 | 3.57E-01 |
| 370.89941 | 41.62  | 20.92 | 22.47 | 22.18 | 22.09 | 1.77E-21  | 4.02E-14 | 5.55E-14 | 3.17E-12 | 2.25E-01 | 7.62E-02 | 9.40E-01 |
| 370.95683 | 39.23  | 17.14 | 18.20 | 17.93 | 18.18 | 4.02E-08  | 3.80E-07 | 2.12E-04 | 1.30E-06 | 5.03E-01 | 1.00E+00 | 5.91E-01 |
| 371.00592 | 23.63  | 15.73 | 16.46 | 16.44 | 16.74 | 2.83E-06  | 7.52E-04 | 9.81E-04 | 2.33E-06 | 1.00E+00 | 5.02E-01 | 4.32E-01 |
| 371.06133 | 65.96  | 8.37  | 19.92 | 7.55  | 7.59  | 5.88E-116 | 5.11E-15 | 2.89E-02 | 5.22E-02 | 5.11E-15 | 5.11E-15 | 9.99E-01 |
| 371.09167 | 21.51  | 14.41 | 15.46 | 15.86 | 15.90 | 3.56E-09  | 1.89E-04 | 7.68E-08 | 8.35E-08 | 3.92E-01 | 3.20E-01 | 9.98E-01 |
| 371.16015 | 33.1   | 18.47 | 18.30 | 18.33 | 17.66 | 2.12E-02  | 9.15E-01 | 9.54E-01 | 1.60E-02 | 9.99E-01 | 1.01E-01 | 7.17E-02 |
| 371.22105 | 237.94 | 21.90 | 21.80 | 22.05 | 22.31 | 5.95E-10  | 4.70E-01 | 1.81E-01 | 3.83E-07 | 4.58E-03 | 5.20E-10 | 2.45E-03 |
| 371.24435 | 220.53 | 16.18 | 16.19 | 16.60 | 16.43 | 1.10E-02  | 1.00E+00 | 1.85E-02 | 3.17E-01 | 2.96E-02 | 3.83E-01 | 6.87E-01 |
| 371.24472 | 21.08  | 15.62 | 15.05 | 14.84 | 16.42 | 1.68E-05  | 2.79E-01 | 6.28E-02 | 6.82E-02 | 9.09E-01 | 3.37E-04 | 1.85E-05 |
| 371.25963 | 184.26 | 17.34 | 15.95 | 17.43 | 17.21 | 7.21E-12  | 9.68E-10 | 9.76E-01 | 9.30E-01 | 2.06E-10 | 1.59E-07 | 7.56E-01 |
| 371.28075 | 210.44 | 13.63 | 14.52 | 15.08 | 14.55 | 1.28E-02  | 1.91E-01 | 5.90E-03 | 1.84E-01 | 5.91E-01 | 1.00E+00 | 6.55E-01 |
| 371.28167 | 284.32 | 14.99 | 16.38 | 17.19 | 16.39 | 2.64E-05  | 1.09E-02 | 7.31E-06 | 1.33E-02 | 2.84E-01 | 1.00E+00 | 3.13E-01 |
| 371.90272 | 40.96  | 16.73 | 18.14 | 17.98 | 17.76 | 1.90E-28  | 6.22E-15 | 2.91E-14 | 4.71E-14 | 5.47E-01 | 1.19E-02 | 2.64E-01 |
| 371.98234 | 52.35  | 13.31 | 13.14 | 14.28 | 14.18 | 5.08E-04  | 9.59E-01 | 1.37E-02 | 4.14E-02 | 3.75E-03 | 1.31E-02 | 9.93E-01 |
| 371.99067 | 32.4   | 13.76 | 15.12 | 15.59 | 13.72 | 5.49E-17  | 9.68E-08 | 5.28E-13 | 9.98E-01 | 1.92E-01 | 2.01E-07 | 2.43E-12 |
| 371.99744 | 30.82  | 15.62 | 15.42 | 15.34 | 15.30 | 8.64E-02  | 4.48E-01 | 1.48E-01 | 9.37E-02 | 9.30E-01 | 8.25E-01 | 9.93E-01 |
| 372.06483 | 70.87  | 13.95 | 15.81 | 12.11 | 12.74 | 2.29E-100 | 5.11E-15 | 5.11E-15 | 6.00E-15 | 5.11E-15 | 5.11E-15 | 6.43E-09 |
| 372.0824  | 18.38  | 13.86 | 15.57 | 15.91 | 16.14 | 1.36E-14  | 3.73E-08 | 2.54E-11 | 8.92E-13 | 6.32E-01 | 2.14E-01 | 8.57E-01 |
| 372.22429 | 238.13 | 19.55 | 19.34 | 19.65 | 19.94 | 2.64E-11  | 3.19E-02 | 5.15E-01 | 3.02E-06 | 4.29E-04 | 3.79E-12 | 1.18E-03 |
| 372.26068 | 175.04 | 15.39 | 13.13 | 15.19 | 14.83 | 2.50E-11  | 9.27E-11 | 9.17E-01 | 3.17E-01 | 7.45E-09 | 4.90E-06 | 7.07E-01 |
| 372.30291 | 26.34  | 13.67 | 14.88 | 13.09 | 15.57 | 4.44E-15  | 2.28E-04 | 1.84E-01 | 5.45E-09 | 3.23E-08 | 1.13E-01 | 1.69E-13 |
| 372.31231 | 266.63 | 18.15 | 18.49 | 18.48 | 19.35 | 1.83E-06  | 3.79E-01 | 4.10E-01 | 5.25E-07 | 1.00E+00 | 8.35E-04 | 5.75E-04 |
| 372.81314 | 59.67  | 15.44 | 12.77 | 14.46 | 14.86 | 1.60E-17  | 4.22E-14 | 2.34E-03 | 1.71E-01 | 4.22E-08 | 5.86E-11 | 5.15E-01 |
| 372.83604 | 57.53  | 21.36 | 19.90 | 20.94 | 21.25 | 3.15E-04  | 3.23E-04 | 6.17E-01 | 9.89E-01 | 2.47E-02 | 2.28E-03 | 8.33E-01 |

|           |        |       |       |       |       |           |          |          |          |          |          |          |
|-----------|--------|-------|-------|-------|-------|-----------|----------|----------|----------|----------|----------|----------|
| 372.85744 | 100.96 | 15.04 | 13.86 | 13.97 | 14.25 | 9.10E-10  | 5.12E-09 | 1.03E-07 | 2.78E-04 | 9.31E-01 | 1.75E-01 | 4.54E-01 |
| 372.87519 | 84.29  | 14.63 | 12.84 | 13.14 | 13.52 | 1.52E-06  | 1.68E-06 | 8.30E-05 | 9.00E-03 | 8.15E-01 | 2.20E-01 | 7.00E-01 |
| 372.89629 | 59.23  | 18.15 | 18.08 | 17.74 | 17.70 | 1.34E-02  | 9.80E-01 | 6.53E-02 | 4.16E-02 | 1.81E-01 | 1.22E-01 | 9.94E-01 |
| 372.91498 | 36.53  | 20.65 | 22.37 | 22.17 | 22.07 | 1.80E-35  | 5.11E-15 | 5.77E-15 | 2.00E-14 | 3.58E-01 | 9.51E-02 | 8.78E-01 |
| 372.98494 | 21.88  | 15.58 | 16.91 | 15.91 | 16.59 | 1.62E-05  | 2.91E-05 | 6.30E-01 | 3.34E-03 | 4.00E-03 | 7.18E-01 | 1.05E-01 |
| 373.05673 | 17.56  | 13.71 | 16.03 | 15.68 | 15.97 | 5.63E-12  | 4.10E-10 | 8.98E-08 | 3.24E-09 | 7.41E-01 | 9.98E-01 | 8.53E-01 |
| 373.06662 | 17.75  | 13.32 | 16.19 | 16.37 | 16.43 | 5.12E-22  | 4.44E-14 | 4.51E-14 | 4.40E-14 | 9.54E-01 | 8.95E-01 | 9.97E-01 |
| 373.20504 | 213.27 | 16.13 | 13.12 | 14.57 | 16.11 | 1.33E-21  | 4.46E-14 | 2.30E-06 | 1.00E+00 | 2.53E-05 | 4.42E-14 | 1.10E-05 |
| 373.23658 | 253.71 | 19.37 | 18.68 | 19.19 | 19.34 | 8.92E-12  | 6.51E-11 | 2.54E-01 | 9.94E-01 | 2.25E-06 | 2.36E-09 | 4.40E-01 |
| 373.26017 | 240.19 | 21.40 | 21.23 | 20.97 | 20.92 | 1.39E-01  | 8.72E-01 | 2.30E-01 | 1.74E-01 | 6.90E-01 | 5.84E-01 | 9.97E-01 |
| 373.27626 | 206.01 | 16.98 | 14.64 | 16.38 | 16.48 | 2.18E-10  | 1.31E-10 | 2.73E-01 | 4.66E-01 | 3.25E-06 | 1.91E-06 | 9.92E-01 |
| 373.29636 | 268.54 | 20.43 | 18.94 | 19.18 | 19.03 | 2.00E-21  | 4.24E-14 | 1.09E-13 | 4.27E-14 | 3.96E-01 | 9.48E-01 | 7.58E-01 |
| 373.83996 | 80.63  | 16.40 | 15.39 | 15.94 | 15.78 | 7.56E-11  | 8.95E-12 | 3.40E-03 | 6.90E-05 | 5.36E-04 | 3.22E-02 | 6.86E-01 |
| 373.90791 | 32.31  | 15.40 | 15.20 | 15.44 | 14.54 | 1.50E-05  | 7.19E-01 | 9.94E-01 | 6.26E-05 | 5.78E-01 | 4.60E-03 | 3.18E-05 |
| 373.91838 | 42.63  | 15.65 | 17.77 | 17.50 | 17.44 | 3.05E-31  | 5.11E-15 | 2.02E-14 | 3.71E-14 | 3.69E-01 | 2.49E-01 | 9.91E-01 |
| 373.94904 | 32.24  | 14.33 | 13.28 | 14.50 | 13.83 | 1.01E-03  | 6.02E-03 | 9.49E-01 | 4.17E-01 | 1.21E-03 | 3.59E-01 | 1.83E-01 |
| 374.03969 | 25.66  | 16.01 | 15.82 | 14.95 | 15.12 | 1.37E-04  | 8.82E-01 | 4.93E-04 | 7.38E-03 | 9.54E-03 | 6.96E-02 | 9.29E-01 |
| 374.19356 | 73.88  | 14.17 | 16.06 | 12.48 | 13.05 | 1.22E-101 | 5.11E-15 | 5.11E-15 | 7.33E-15 | 5.11E-15 | 5.11E-15 | 5.48E-08 |
| 374.22182 | 162.02 | 14.00 | 14.43 | 14.29 | 14.59 | 1.11E-01  | 2.85E-01 | 6.12E-01 | 8.62E-02 | 9.45E-01 | 9.27E-01 | 6.50E-01 |
| 374.23081 | 61.93  | 13.86 | 19.76 | 12.05 | 12.63 | 2.34E-163 | 5.11E-15 | 5.11E-15 | 7.99E-15 | 5.11E-15 | 5.11E-15 | 5.23E-07 |
| 374.24541 | 180.19 | 22.66 | 22.91 | 22.89 | 22.06 | 8.05E-06  | 4.28E-01 | 5.04E-01 | 4.53E-03 | 9.99E-01 | 2.27E-05 | 3.41E-05 |
| 374.26341 | 227.86 | 19.05 | 18.66 | 18.38 | 18.42 | 2.39E-02  | 3.70E-01 | 2.69E-02 | 5.59E-02 | 6.59E-01 | 7.83E-01 | 9.98E-01 |
| 374.28219 | 259.6  | 18.45 | 17.06 | 16.18 | 15.61 | 2.01E-14  | 2.88E-04 | 4.71E-10 | 1.26E-13 | 5.09E-02 | 3.17E-04 | 3.63E-01 |
| 374.29961 | 269.33 | 17.79 | 15.88 | 15.63 | 15.45 | 3.85E-08  | 3.75E-05 | 1.92E-06 | 5.28E-07 | 9.37E-01 | 7.51E-01 | 9.72E-01 |
| 374.77411 | 89.96  | 16.42 | 17.94 | 18.09 | 17.55 | 5.45E-25  | 4.14E-14 | 2.04E-14 | 1.99E-11 | 7.87E-01 | 6.49E-02 | 4.16E-03 |
| 374.85242 | 63.23  | 21.10 | 20.39 | 20.96 | 20.77 | 3.11E-07  | 1.58E-07 | 6.41E-01 | 4.31E-02 | 6.13E-05 | 2.14E-02 | 4.52E-01 |
| 374.8862  | 39.22  | 13.31 | 14.59 | 14.37 | 14.42 | 4.57E-02  | 5.35E-02 | 1.43E-01 | 1.34E-01 | 9.73E-01 | 9.89E-01 | 1.00E+00 |
| 374.89224 | 62.7   | 15.36 | 13.31 | 14.71 | 15.28 | 2.93E-14  | 3.52E-13 | 5.03E-02 | 9.91E-01 | 1.14E-06 | 2.43E-11 | 1.39E-01 |
| 374.91059 | 38.95  | 16.80 | 18.46 | 18.42 | 18.23 | 9.20E-29  | 1.20E-14 | 1.60E-14 | 4.49E-14 | 9.91E-01 | 4.17E-01 | 5.85E-01 |
| 374.91945 | 43.61  | 14.19 | 15.30 | 15.04 | 14.88 | 7.14E-12  | 5.72E-12 | 1.03E-07 | 4.61E-05 | 3.03E-01 | 3.41E-02 | 7.18E-01 |
| 374.96949 | 46.63  | 16.73 | 14.94 | 15.60 | 15.43 | 7.39E-05  | 3.41E-05 | 1.72E-02 | 6.44E-03 | 3.43E-01 | 6.21E-01 | 9.77E-01 |
| 374.99057 | 31.81  | 15.04 | 15.27 | 15.35 | 15.67 | 9.41E-03  | 5.62E-01 | 2.98E-01 | 3.69E-03 | 9.74E-01 | 1.49E-01 | 3.13E-01 |
| 375.06146 | 28.49  | 12.64 | 16.34 | 16.66 | 14.91 | 2.65E-47  | 5.11E-15 | 5.11E-15 | 4.33E-14 | 5.37E-01 | 7.65E-08 | 3.71E-11 |
| 375.09519 | 66.82  | 15.99 | 17.19 | 15.21 | 15.43 | 1.25E-83  | 5.11E-15 | 5.77E-15 | 5.35E-14 | 5.11E-15 | 5.11E-15 | 6.69E-03 |
| 375.11613 | 49.76  | 12.07 | 16.96 | 12.61 | 12.47 | 5.98E-22  | 4.14E-14 | 6.52E-01 | 8.46E-01 | 4.42E-14 | 4.40E-14 | 9.91E-01 |
| 375.1548  | 24.57  | 13.25 | 13.53 | 14.37 | 12.83 | 4.91E-02  | 9.53E-01 | 1.56E-01 | 8.75E-01 | 4.24E-01 | 6.08E-01 | 3.45E-02 |
| 375.19474 | 215.76 | 16.51 | 15.26 | 15.56 | 15.69 | 3.40E-07  | 2.13E-07 | 1.11E-04 | 1.84E-03 | 5.29E-01 | 2.47E-01 | 9.44E-01 |
| 375.22148 | 247.45 | 20.43 | 19.97 | 20.13 | 20.55 | 2.14E-11  | 2.52E-07 | 1.25E-03 | 4.42E-01 | 2.23E-01 | 4.64E-10 | 6.15E-06 |
| 375.23134 | 179.48 | 15.70 | 13.31 | 13.79 | 13.71 | 1.47E-15  | 6.66E-14 | 4.68E-10 | 4.44E-10 | 3.50E-01 | 5.24E-01 | 9.95E-01 |
| 375.23384 | 63.29  | 4.59  | 16.82 | 4.40  | 4.35  | 4.36E-177 | 5.11E-15 | 6.07E-01 | 4.02E-01 | 5.11E-15 | 5.11E-15 | 9.83E-01 |
| 375.24885 | 174.83 | 20.41 | 20.64 | 20.66 | 19.79 | 1.09E-05  | 5.55E-01 | 4.72E-01 | 4.37E-03 | 9.99E-01 | 5.08E-05 | 2.62E-05 |
| 375.27572 | 246.18 | 22.62 | 22.20 | 22.16 | 22.21 | 2.69E-04  | 2.45E-03 | 7.03E-04 | 5.57E-03 | 9.91E-01 | 9.99E-01 | 9.72E-01 |
| 375.29127 | 224.93 | 16.82 | 15.31 | 16.23 | 16.39 | 1.20E-07  | 2.48E-08 | 8.09E-02 | 3.37E-01 | 1.68E-03 | 2.53E-04 | 9.25E-01 |
| 375.85684 | 55.55  | 16.46 | 14.30 | 15.98 | 16.12 | 2.28E-25  | 9.77E-15 | 4.49E-02 | 2.76E-01 | 4.31E-14 | 4.33E-14 | 8.87E-01 |
| 375.89195 | 37.84  | 16.43 | 14.63 | 15.32 | 14.60 | 2.12E-06  | 1.40E-05 | 1.41E-02 | 1.55E-05 | 2.76E-01 | 1.00E+00 | 2.50E-01 |

|           |        |       |       |       |       |           |          |          |          |          |          |          |
|-----------|--------|-------|-------|-------|-------|-----------|----------|----------|----------|----------|----------|----------|
| 375.92273 | 35.99  | 13.62 | 14.96 | 15.36 | 14.62 | 6.14E-08  | 3.55E-05 | 3.35E-08 | 4.96E-03 | 5.35E-01 | 6.75E-01 | 7.17E-02 |
| 375.96456 | 36.39  | 15.28 | 13.91 | 14.95 | 14.82 | 2.21E-05  | 8.19E-06 | 6.16E-01 | 3.63E-01 | 1.64E-03 | 1.10E-02 | 9.70E-01 |
| 375.99311 | 29.54  | 12.94 | 15.91 | 16.46 | 14.69 | 2.85E-63  | 5.11E-15 | 5.11E-15 | 2.49E-14 | 2.75E-03 | 5.80E-12 | 2.53E-14 |
| 376.00966 | 24.28  | 16.43 | 16.45 | 16.76 | 16.89 | 3.26E-02  | 1.00E+00 | 2.51E-01 | 6.22E-02 | 3.30E-01 | 9.40E-02 | 8.97E-01 |
| 376.0668  | 18.28  | 12.78 | 14.26 | 13.01 | 14.39 | 6.46E-05  | 2.13E-03 | 9.45E-01 | 9.47E-04 | 1.58E-02 | 9.90E-01 | 7.62E-03 |
| 376.10088 | 16.93  | 13.75 | 15.26 | 14.67 | 15.00 | 3.18E-08  | 3.24E-08 | 1.40E-03 | 1.28E-05 | 9.34E-02 | 7.36E-01 | 5.99E-01 |
| 376.22528 | 250.76 | 16.95 | 16.74 | 16.77 | 17.32 | 2.52E-05  | 3.08E-01 | 4.73E-01 | 1.48E-02 | 9.91E-01 | 4.49E-05 | 1.32E-04 |
| 376.2346  | 38.32  | 12.76 | 14.44 | 11.65 | 12.00 | 1.18E-23  | 3.45E-10 | 4.09E-05 | 1.40E-02 | 2.15E-14 | 4.14E-14 | 5.14E-01 |
| 376.25181 | 180.51 | 17.40 | 17.34 | 17.41 | 16.66 | 4.05E-05  | 9.86E-01 | 1.00E+00 | 1.57E-04 | 9.78E-01 | 9.03E-04 | 1.72E-04 |
| 376.27921 | 253.12 | 20.41 | 19.98 | 19.98 | 19.96 | 7.54E-04  | 4.92E-03 | 4.65E-03 | 3.54E-03 | 1.00E+00 | 9.98E-01 | 9.97E-01 |
| 376.77227 | 90.86  | 15.23 | 15.81 | 15.87 | 15.54 | 1.19E-04  | 1.17E-03 | 1.84E-04 | 1.88E-01 | 9.74E-01 | 3.67E-01 | 1.72E-01 |
| 376.78982 | 72.82  | 18.16 | 19.19 | 19.49 | 19.06 | 9.57E-19  | 4.99E-12 | 4.42E-14 | 3.85E-09 | 1.44E-01 | 7.95E-01 | 1.52E-02 |
| 376.84462 | 53.93  | 16.97 | 17.00 | 17.33 | 16.24 | 2.15E-11  | 9.96E-01 | 3.89E-02 | 2.58E-06 | 8.23E-02 | 1.86E-06 | 3.71E-12 |
| 376.85613 | 140.91 | 16.31 | 15.14 | 14.63 | 16.04 | 1.15E-15  | 1.42E-07 | 7.41E-14 | 5.52E-01 | 6.40E-02 | 2.18E-04 | 1.20E-09 |
| 376.87043 | 82.48  | 14.37 | 13.55 | 13.81 | 14.59 | 2.23E-03  | 2.62E-02 | 2.09E-01 | 8.77E-01 | 8.18E-01 | 4.28E-03 | 5.06E-02 |
| 376.90492 | 32.64  | 15.86 | 18.89 | 18.80 | 18.24 | 1.07E-47  | 5.11E-15 | 5.11E-15 | 5.11E-15 | 9.56E-01 | 3.59E-03 | 1.63E-02 |
| 376.92786 | 50.42  | 18.89 | 17.85 | 18.48 | 18.37 | 6.41E-04  | 1.70E-04 | 3.11E-01 | 1.55E-01 | 6.18E-02 | 1.91E-01 | 9.74E-01 |
| 376.94682 | 43.4   | 18.11 | 19.17 | 19.56 | 19.30 | 6.97E-13  | 3.41E-07 | 1.89E-12 | 2.04E-08 | 1.81E-01 | 9.11E-01 | 5.58E-01 |
| 376.97031 | 27.83  | 14.19 | 14.78 | 14.21 | 15.03 | 2.96E-02  | 2.74E-01 | 1.00E+00 | 5.90E-02 | 3.21E-01 | 8.79E-01 | 7.62E-02 |
| 376.97874 | 25.09  | 12.68 | 15.83 | 16.10 | 14.96 | 3.28E-23  | 4.46E-14 | 3.46E-14 | 3.79E-10 | 8.44E-01 | 5.21E-02 | 4.49E-03 |
| 377.00568 | 187.77 | 17.60 | 16.91 | 16.92 | 17.71 | 4.85E-08  | 1.45E-04 | 1.40E-04 | 8.95E-01 | 1.00E+00 | 1.99E-05 | 1.91E-05 |
| 377.01339 | 17.36  | 12.88 | 17.15 | 17.25 | 17.03 | 4.19E-20  | 4.53E-14 | 4.41E-14 | 9.13E-14 | 9.97E-01 | 9.95E-01 | 9.71E-01 |
| 377.06356 | 32.79  | 14.52 | 12.45 | 15.30 | 14.79 | 8.98E-11  | 1.99E-06 | 1.97E-01 | 9.08E-01 | 1.11E-10 | 3.07E-07 | 6.13E-01 |
| 377.0742  | 51.86  | 14.56 | 23.95 | 14.32 | 13.32 | 5.26E-117 | 5.11E-15 | 7.49E-01 | 4.75E-06 | 5.11E-15 | 5.11E-15 | 4.31E-04 |
| 377.08691 | 20.77  | 19.70 | 20.43 | 20.28 | 20.26 | 2.52E-05  | 2.96E-05 | 1.17E-03 | 2.94E-03 | 7.94E-01 | 7.42E-01 | 9.99E-01 |
| 377.09499 | 29.42  | 16.28 | 18.04 | 15.56 | 15.75 | 1.17E-84  | 5.11E-15 | 4.42E-14 | 2.43E-09 | 5.11E-15 | 5.11E-15 | 1.24E-01 |
| 377.16619 | 234.03 | 16.24 | 17.21 | 17.56 | 17.76 | 2.01E-12  | 1.61E-05 | 1.70E-09 | 1.91E-11 | 3.27E-01 | 4.67E-02 | 7.61E-01 |
| 377.21079 | 245.21 | 20.16 | 19.86 | 20.18 | 19.98 | 3.54E-03  | 1.18E-02 | 9.96E-01 | 2.79E-01 | 7.37E-03 | 6.33E-01 | 2.05E-01 |
| 377.23683 | 271.6  | 22.05 | 22.08 | 22.23 | 22.90 | 6.84E-09  | 9.96E-01 | 5.32E-01 | 2.62E-08 | 6.96E-01 | 1.93E-07 | 2.49E-05 |
| 377.2818  | 250.32 | 17.29 | 16.14 | 16.04 | 16.09 | 1.29E-10  | 1.61E-07 | 6.40E-09 | 8.09E-08 | 9.50E-01 | 9.93E-01 | 9.95E-01 |
| 377.92301 | 33.18  | 15.67 | 15.11 | 15.39 | 15.02 | 5.46E-02  | 1.28E-01 | 6.94E-01 | 6.06E-02 | 6.96E-01 | 9.83E-01 | 4.82E-01 |
| 377.94883 | 87.03  | 14.02 | 15.59 | 16.80 | 16.06 | 3.14E-33  | 1.82E-13 | 5.11E-15 | 4.15E-14 | 1.63E-08 | 9.59E-02 | 1.50E-03 |
| 377.99008 | 30.09  | 12.67 | 12.46 | 13.75 | 12.10 | 5.24E-08  | 8.55E-01 | 3.03E-04 | 1.44E-01 | 1.82E-05 | 5.48E-01 | 4.60E-08 |
| 378.07766 | 53.65  | 15.41 | 20.90 | 14.36 | 14.64 | 5.84E-165 | 5.11E-15 | 6.00E-15 | 4.86E-14 | 5.11E-15 | 5.11E-15 | 1.05E-02 |
| 378.0904  | 21.56  | 16.24 | 16.83 | 16.57 | 16.61 | 2.45E-02  | 1.20E-02 | 3.21E-01 | 2.34E-01 | 5.20E-01 | 6.97E-01 | 9.95E-01 |
| 378.21399 | 242.97 | 17.10 | 16.61 | 16.99 | 16.24 | 6.22E-04  | 1.10E-01 | 9.55E-01 | 7.28E-04 | 3.18E-01 | 3.53E-01 | 5.44E-03 |
| 378.24063 | 267.46 | 19.01 | 18.91 | 19.10 | 20.08 | 5.44E-09  | 9.41E-01 | 9.62E-01 | 2.36E-07 | 7.30E-01 | 3.15E-08 | 3.90E-06 |
| 378.24209 | 173.38 | 14.96 | 18.01 | 17.80 | 16.35 | 3.33E-14  | 2.01E-12 | 3.45E-11 | 3.73E-03 | 9.52E-01 | 5.11E-04 | 2.99E-03 |
| 378.78127 | 68.23  | 17.51 | 17.73 | 18.09 | 18.00 | 1.16E-08  | 9.76E-02 | 3.38E-08 | 7.37E-06 | 2.06E-03 | 4.19E-02 | 8.29E-01 |
| 378.78818 | 82.79  | 15.79 | 16.82 | 17.19 | 16.57 | 2.31E-18  | 3.64E-11 | 4.09E-14 | 1.48E-06 | 5.95E-02 | 3.18E-01 | 2.36E-04 |
| 378.8206  | 95.83  | 13.75 | 13.73 | 13.76 | 14.01 | 4.38E-01  | 9.99E-01 | 1.00E+00 | 5.23E-01 | 9.99E-01 | 4.63E-01 | 5.51E-01 |
| 378.84088 | 61.77  | 15.62 | 14.52 | 15.10 | 14.25 | 2.03E-13  | 5.66E-09 | 1.48E-02 | 1.70E-12 | 5.53E-03 | 4.35E-01 | 1.98E-05 |
| 378.852   | 137.91 | 16.05 | 15.20 | 14.74 | 16.16 | 4.01E-06  | 2.36E-02 | 7.50E-05 | 9.84E-01 | 4.22E-01 | 1.30E-02 | 4.57E-05 |
| 378.86545 | 161.97 | 18.44 | 16.69 | 16.24 | 17.24 | 7.66E-35  | 1.15E-14 | 5.11E-15 | 1.67E-12 | 1.99E-02 | 3.31E-03 | 6.73E-09 |
| 378.88613 | 46.21  | 20.85 | 20.58 | 21.55 | 21.44 | 1.17E-29  | 3.17E-03 | 4.44E-14 | 6.82E-11 | 7.11E-15 | 4.15E-14 | 5.02E-01 |

|           |        |       |       |       |       |           |          |          |          |          |          |          |
|-----------|--------|-------|-------|-------|-------|-----------|----------|----------|----------|----------|----------|----------|
| 378.92459 | 45.46  | 15.80 | 13.62 | 14.02 | 13.96 | 8.17E-06  | 1.68E-05 | 5.92E-04 | 6.01E-04 | 8.20E-01 | 8.92E-01 | 9.99E-01 |
| 378.94353 | 86.22  | 13.74 | 15.68 | 16.74 | 15.90 | 1.77E-33  | 4.37E-14 | 5.11E-15 | 4.31E-14 | 6.44E-06 | 7.62E-01 | 7.17E-04 |
| 378.97356 | 18.13  | 15.47 | 12.03 | 11.64 | 13.56 | 1.88E-24  | 4.33E-14 | 2.49E-14 | 1.34E-06 | 6.90E-01 | 2.48E-04 | 1.80E-06 |
| 378.98361 | 38.69  | 17.33 | 16.19 | 16.20 | 17.13 | 4.49E-09  | 1.28E-06 | 1.16E-06 | 8.00E-01 | 1.00E+00 | 2.33E-04 | 2.27E-04 |
| 379.02919 | 19.14  | 13.47 | 15.03 | 14.81 | 15.89 | 1.78E-09  | 5.11E-05 | 6.28E-04 | 4.04E-10 | 9.20E-01 | 8.83E-02 | 1.58E-02 |
| 379.07216 | 61.58  | 13.81 | 19.78 | 11.76 | 12.42 | 3.41E-155 | 5.11E-15 | 5.11E-15 | 8.66E-15 | 5.11E-15 | 5.11E-15 | 5.68E-07 |
| 379.08312 | 30.2   | 17.74 | 18.86 | 18.34 | 18.27 | 6.04E-09  | 5.65E-10 | 1.46E-03 | 9.92E-03 | 1.31E-02 | 4.64E-03 | 9.74E-01 |
| 379.1563  | 143.58 | 14.89 | 13.00 | 12.37 | 14.52 | 4.60E-16  | 1.73E-08 | 1.10E-13 | 6.51E-01 | 1.95E-01 | 2.28E-05 | 9.27E-10 |
| 379.1897  | 64.55  | 18.78 | 17.90 | 19.09 | 19.77 | 3.29E-13  | 2.45E-04 | 4.75E-01 | 6.20E-05 | 6.39E-07 | 9.13E-14 | 1.32E-02 |
| 379.22601 | 265.75 | 20.14 | 20.05 | 20.28 | 20.28 | 8.17E-02  | 8.29E-01 | 4.75E-01 | 5.38E-01 | 1.17E-01 | 1.52E-01 | 1.00E+00 |
| 379.24994 | 26.37  | 17.37 | 15.57 | 16.92 | 17.51 | 4.99E-04  | 1.36E-03 | 7.82E-01 | 9.92E-01 | 3.30E-02 | 1.02E-03 | 6.48E-01 |
| 379.25188 | 296.28 | 17.44 | 19.93 | 20.52 | 20.49 | 9.88E-19  | 5.01E-11 | 4.34E-14 | 5.11E-14 | 3.44E-01 | 4.22E-01 | 1.00E+00 |
| 379.2972  | 277.01 | 18.38 | 18.30 | 18.47 | 18.10 | 8.30E-02  | 9.47E-01 | 9.05E-01 | 2.17E-01 | 6.31E-01 | 5.24E-01 | 5.66E-02 |
| 379.88907 | 50.98  | 16.31 | 15.47 | 16.67 | 16.61 | 1.69E-24  | 8.19E-13 | 3.57E-03 | 2.88E-02 | 2.51E-14 | 4.17E-14 | 9.49E-01 |
| 379.93063 | 26.2   | 13.41 | 14.84 | 14.80 | 14.93 | 2.47E-15  | 1.53E-11 | 3.83E-11 | 3.44E-12 | 9.96E-01 | 9.74E-01 | 9.19E-01 |
| 379.942   | 30.58  | 14.09 | 15.25 | 15.15 | 15.19 | 2.50E-06  | 2.20E-05 | 1.07E-04 | 1.08E-04 | 9.79E-01 | 9.95E-01 | 9.99E-01 |
| 380.00709 | 33.74  | 13.10 | 14.71 | 13.53 | 15.55 | 7.29E-10  | 1.08E-04 | 6.36E-01 | 3.37E-09 | 1.03E-02 | 1.37E-01 | 2.22E-06 |
| 380.01586 | 17.94  | 15.30 | 19.16 | 19.29 | 18.37 | 3.84E-54  | 5.11E-15 | 5.11E-15 | 5.11E-15 | 9.27E-01 | 2.50E-03 | 2.29E-04 |
| 380.06244 | 22.34  | 15.28 | 16.50 | 16.93 | 16.56 | 6.04E-12  | 6.03E-07 | 8.74E-12 | 3.23E-07 | 2.33E-01 | 9.94E-01 | 3.87E-01 |
| 380.07552 | 53.9   | 14.79 | 15.67 | 13.56 | 13.97 | 5.58E-85  | 5.11E-15 | 5.11E-15 | 7.11E-15 | 5.11E-15 | 5.11E-15 | 1.03E-07 |
| 380.1931  | 71.88  | 16.17 | 14.32 | 16.23 | 17.08 | 6.57E-16  | 4.11E-09 | 9.98E-01 | 1.29E-02 | 3.04E-09 | 4.29E-14 | 2.60E-02 |
| 380.22974 | 268.1  | 17.25 | 17.58 | 18.02 | 17.52 | 2.50E-02  | 5.48E-01 | 1.16E-02 | 7.17E-01 | 3.20E-01 | 9.96E-01 | 2.30E-01 |
| 380.25633 | 297.11 | 14.08 | 17.30 | 18.02 | 18.00 | 7.91E-23  | 1.58E-13 | 4.13E-14 | 4.24E-14 | 2.69E-01 | 3.33E-01 | 1.00E+00 |
| 380.25778 | 176.04 | 10.39 | 14.41 | 13.98 | 12.53 | 1.98E-11  | 1.52E-10 | 7.39E-09 | 1.83E-03 | 8.85E-01 | 1.12E-02 | 7.49E-02 |
| 380.77949 | 76.69  | 16.46 | 16.66 | 17.05 | 16.91 | 1.84E-10  | 1.07E-01 | 3.09E-10 | 5.41E-06 | 7.08E-05 | 3.17E-02 | 3.88E-01 |
| 380.79782 | 71.15  | 17.31 | 17.08 | 17.81 | 17.68 | 2.88E-17  | 2.73E-02 | 9.25E-09 | 5.47E-05 | 4.29E-14 | 1.13E-10 | 4.27E-01 |
| 380.8088  | 84.09  | 15.26 | 15.46 | 16.18 | 15.46 | 3.45E-12  | 3.38E-01 | 3.52E-12 | 3.91E-01 | 1.41E-07 | 1.00E+00 | 2.24E-07 |
| 380.82649 | 85.24  | 13.64 | 11.82 | 13.03 | 14.16 | 4.58E-13  | 3.21E-09 | 1.26E-01 | 2.72E-01 | 2.00E-04 | 7.42E-13 | 8.50E-04 |
| 380.84556 | 41.01  | 21.41 | 21.72 | 22.61 | 22.40 | 2.16E-28  | 1.12E-02 | 7.33E-15 | 4.31E-14 | 5.13E-14 | 7.38E-09 | 1.76E-01 |
| 380.85786 | 37.65  | 15.31 | 15.37 | 15.86 | 14.60 | 2.58E-05  | 9.92E-01 | 8.66E-02 | 2.15E-02 | 1.85E-01 | 1.21E-02 | 4.74E-06 |
| 380.86455 | 62.33  | 16.54 | 15.46 | 17.39 | 17.26 | 7.81E-38  | 5.52E-14 | 4.83E-10 | 4.60E-07 | 5.11E-15 | 5.11E-15 | 7.41E-01 |
| 380.87333 | 27.73  | 14.64 | 15.90 | 16.34 | 15.21 | 2.68E-15  | 8.23E-09 | 5.14E-14 | 2.86E-02 | 1.27E-01 | 6.61E-03 | 8.02E-07 |
| 380.88124 | 157.19 | 17.77 | 14.63 | 13.63 | 14.39 | 4.90E-26  | 4.46E-14 | 9.10E-15 | 4.33E-14 | 3.08E-02 | 9.17E-01 | 1.73E-01 |
| 381.00877 | 47.74  | 15.36 | 15.76 | 16.85 | 16.54 | 8.94E-06  | 5.78E-01 | 1.78E-05 | 1.74E-03 | 4.39E-03 | 8.88E-02 | 7.82E-01 |
| 381.11136 | 18.42  | 23.33 | 23.99 | 23.93 | 23.54 | 1.89E-05  | 9.71E-05 | 3.94E-04 | 5.41E-01 | 9.82E-01 | 2.28E-02 | 5.73E-02 |
| 381.18764 | 73.79  | 14.49 | 12.03 | 13.76 | 14.98 | 1.10E-15  | 5.49E-12 | 1.10E-01 | 4.47E-01 | 2.24E-06 | 5.13E-14 | 2.21E-03 |
| 381.20545 | 185.29 | 14.84 | 12.50 | 12.84 | 13.02 | 2.76E-14  | 4.18E-13 | 3.03E-10 | 3.40E-08 | 6.61E-01 | 3.25E-01 | 9.33E-01 |
| 381.20571 | 86.64  | 15.55 | 14.72 | 15.30 | 16.01 | 1.70E-15  | 1.58E-08 | 2.48E-01 | 5.82E-03 | 1.65E-04 | 4.43E-14 | 6.45E-06 |
| 381.23194 | 291.27 | 14.48 | 17.00 | 17.31 | 15.57 | 3.50E-21  | 4.46E-14 | 4.22E-14 | 1.42E-03 | 7.30E-01 | 2.16E-05 | 1.37E-07 |
| 381.23229 | 180.38 | 17.66 | 17.82 | 17.61 | 18.11 | 4.95E-02  | 8.25E-01 | 9.92E-01 | 8.42E-02 | 6.77E-01 | 4.40E-01 | 4.80E-02 |
| 381.24275 | 299.53 | 16.54 | 17.64 | 18.34 | 17.56 | 6.78E-20  | 3.47E-09 | 3.46E-14 | 1.01E-07 | 3.67E-04 | 9.70E-01 | 8.69E-05 |
| 381.24714 | 178.36 | 14.97 | 15.54 | 14.74 | 15.67 | 1.78E-05  | 3.00E-02 | 6.49E-01 | 5.81E-03 | 8.65E-04 | 9.34E-01 | 1.17E-04 |
| 381.26547 | 28.93  | 15.13 | 12.36 | 13.33 | 14.99 | 2.30E-11  | 8.36E-10 | 9.74E-05 | 9.88E-01 | 9.51E-02 | 3.32E-08 | 8.82E-04 |
| 381.31276 | 296.97 | 15.53 | 15.44 | 16.23 | 15.46 | 8.60E-06  | 9.49E-01 | 2.74E-04 | 9.79E-01 | 5.01E-05 | 9.99E-01 | 1.40E-04 |
| 381.8477  | 46.85  | 17.10 | 16.85 | 18.19 | 17.94 | 9.66E-32  | 8.48E-02 | 3.97E-14 | 1.50E-12 | 5.77E-15 | 4.40E-14 | 1.18E-01 |

|           |        |       |       |       |       |          |          |          |          |          |          |          |
|-----------|--------|-------|-------|-------|-------|----------|----------|----------|----------|----------|----------|----------|
| 381.86646 | 28.92  | 14.11 | 14.47 | 13.74 | 14.90 | 4.23E-03 | 6.55E-01 | 6.43E-01 | 6.40E-02 | 1.07E-01 | 5.46E-01 | 2.56E-03 |
| 381.92144 | 35.16  | 16.53 | 17.22 | 17.11 | 16.43 | 9.13E-12 | 1.83E-07 | 1.18E-05 | 8.19E-01 | 8.12E-01 | 9.90E-09 | 6.85E-07 |
| 381.93081 | 35.52  | 17.13 | 19.16 | 19.37 | 18.55 | 8.21E-49 | 5.11E-15 | 5.11E-15 | 2.26E-14 | 3.37E-01 | 3.41E-05 | 8.35E-09 |
| 382.00617 | 55.08  | 16.03 | 17.85 | 18.82 | 17.98 | 5.13E-34 | 4.33E-14 | 5.11E-15 | 4.17E-14 | 6.61E-06 | 9.13E-01 | 2.04E-04 |
| 382.10155 | 17.81  | 19.03 | 21.11 | 21.16 | 20.90 | 1.53E-24 | 4.15E-14 | 3.69E-14 | 4.46E-14 | 9.95E-01 | 7.53E-01 | 6.00E-01 |
| 382.11487 | 18.56  | 19.77 | 20.39 | 20.34 | 19.97 | 3.08E-05 | 1.34E-04 | 5.68E-04 | 5.37E-01 | 9.80E-01 | 2.85E-02 | 7.26E-02 |
| 382.23572 | 180.66 | 14.97 | 14.92 | 14.43 | 15.38 | 3.17E-03 | 9.97E-01 | 1.07E-01 | 3.38E-01 | 1.91E-01 | 2.60E-01 | 1.06E-03 |
| 382.24287 | 171.08 | 16.34 | 16.10 | 16.71 | 15.96 | 1.33E-02 | 7.10E-01 | 3.88E-01 | 3.71E-01 | 5.02E-02 | 9.43E-01 | 1.20E-02 |
| 382.24479 | 297.4  | 13.26 | 14.43 | 15.42 | 14.27 | 6.06E-13 | 6.05E-05 | 7.79E-14 | 1.19E-03 | 1.40E-03 | 9.28E-01 | 1.82E-04 |
| 382.29677 | 224.67 | 17.18 | 15.63 | 16.32 | 15.94 | 2.34E-19 | 4.25E-14 | 3.78E-07 | 1.13E-12 | 9.49E-05 | 2.35E-01 | 8.09E-02 |
| 382.79592 | 68.47  | 15.98 | 15.38 | 15.92 | 16.05 | 5.86E-14 | 2.64E-11 | 8.34E-01 | 8.87E-01 | 6.82E-09 | 3.74E-12 | 4.33E-01 |
| 382.81862 | 94.18  | 17.85 | 17.42 | 17.51 | 17.32 | 4.05E-05 | 8.76E-04 | 1.50E-02 | 4.72E-05 | 8.32E-01 | 8.56E-01 | 3.65E-01 |
| 382.82432 | 76.47  | 13.41 | 11.32 | 13.57 | 13.32 | 5.60E-21 | 4.37E-14 | 8.95E-01 | 9.77E-01 | 4.42E-14 | 8.26E-14 | 7.08E-01 |
| 382.84411 | 41.3   | 19.55 | 19.72 | 20.67 | 20.49 | 1.22E-28 | 2.79E-01 | 1.31E-14 | 4.15E-14 | 4.16E-14 | 2.06E-11 | 2.65E-01 |
| 382.86307 | 69.32  | 14.75 | 11.12 | 14.60 | 14.93 | 7.04E-39 | 5.11E-15 | 9.36E-01 | 9.03E-01 | 5.11E-15 | 5.11E-15 | 6.11E-01 |
| 382.87279 | 25.8   | 13.83 | 13.13 | 14.41 | 13.02 | 2.56E-02 | 4.86E-01 | 6.40E-01 | 3.84E-01 | 5.66E-02 | 9.97E-01 | 3.91E-02 |
| 382.91489 | 32.43  | 14.73 | 15.51 | 16.15 | 15.61 | 1.30E-07 | 4.73E-03 | 2.02E-08 | 1.57E-03 | 4.03E-02 | 9.80E-01 | 1.23E-01 |
| 382.9554  | 24.51  | 14.80 | 16.79 | 16.81 | 16.67 | 3.72E-11 | 8.33E-09 | 4.29E-09 | 1.49E-07 | 1.00E+00 | 9.83E-01 | 9.73E-01 |
| 383.01487 | 40.63  | 14.11 | 16.85 | 14.23 | 13.83 | 2.21E-30 | 1.07E-14 | 9.48E-01 | 6.48E-01 | 2.93E-14 | 6.22E-15 | 3.48E-01 |
| 383.0313  | 32.73  | 15.63 | 14.97 | 15.04 | 14.51 | 1.21E-04 | 2.64E-02 | 5.68E-02 | 3.22E-05 | 9.90E-01 | 2.50E-01 | 1.36E-01 |
| 383.05216 | 17.11  | 15.62 | 18.60 | 18.79 | 17.77 | 5.49E-31 | 7.77E-15 | 5.11E-15 | 7.33E-14 | 8.83E-01 | 1.01E-02 | 7.65E-04 |
| 383.08238 | 46.46  | 14.50 | 18.36 | 13.47 | 14.26 | 2.30E-49 | 5.11E-15 | 3.77E-04 | 7.91E-01 | 5.11E-15 | 5.11E-15 | 1.85E-02 |
| 383.09069 | 22.07  | 17.05 | 17.78 | 18.37 | 18.22 | 8.85E-20 | 7.57E-07 | 4.37E-14 | 6.52E-14 | 1.90E-04 | 1.26E-02 | 7.29E-01 |
| 383.10666 | 21.05  | 18.74 | 19.61 | 19.62 | 19.41 | 5.57E-13 | 9.36E-11 | 3.55E-11 | 1.58E-06 | 1.00E+00 | 3.93E-01 | 3.35E-01 |
| 383.1156  | 22.4   | 18.95 | 19.13 | 19.01 | 19.06 | 3.65E-02 | 2.14E-02 | 7.10E-01 | 2.97E-01 | 2.74E-01 | 7.27E-01 | 8.92E-01 |
| 383.22071 | 203.7  | 17.99 | 17.03 | 17.35 | 17.38 | 2.02E-05 | 6.95E-06 | 4.54E-03 | 1.24E-02 | 3.77E-01 | 3.04E-01 | 9.98E-01 |
| 383.24307 | 176.84 | 15.56 | 13.65 | 16.39 | 14.79 | 2.38E-14 | 2.44E-08 | 4.25E-02 | 7.97E-02 | 5.38E-14 | 3.45E-03 | 1.28E-05 |
| 383.29584 | 276.52 | 19.13 | 18.41 | 19.14 | 18.97 | 1.24E-04 | 3.10E-04 | 1.00E+00 | 7.84E-01 | 3.55E-04 | 1.61E-02 | 7.68E-01 |
| 383.31732 | 291.52 | 14.45 | 15.32 | 15.67 | 14.58 | 6.33E-04 | 4.65E-02 | 1.37E-03 | 9.81E-01 | 7.14E-01 | 1.54E-01 | 9.69E-03 |
| 383.84551 | 53.22  | 15.42 | 14.66 | 15.62 | 15.37 | 7.95E-09 | 3.24E-06 | 5.55E-01 | 9.88E-01 | 7.94E-09 | 4.67E-05 | 4.01E-01 |
| 383.93696 | 30.69  | 17.64 | 18.30 | 18.43 | 17.60 | 1.48E-09 | 5.56E-05 | 8.19E-07 | 9.96E-01 | 8.34E-01 | 6.08E-05 | 1.16E-06 |
| 384.0352  | 20.13  | 19.28 | 19.99 | 19.84 | 20.29 | 2.60E-05 | 3.07E-03 | 2.95E-02 | 1.10E-05 | 8.84E-01 | 4.75E-01 | 1.35E-01 |
| 384.11913 | 23.42  | 15.16 | 14.49 | 13.85 | 14.45 | 7.93E-03 | 2.85E-01 | 2.84E-03 | 2.49E-01 | 3.37E-01 | 9.99E-01 | 4.29E-01 |
| 384.22433 | 211.54 | 15.22 | 13.77 | 14.13 | 14.57 | 5.33E-04 | 3.39E-04 | 1.11E-02 | 2.86E-01 | 7.54E-01 | 1.40E-01 | 6.25E-01 |
| 384.25723 | 168.13 | 17.97 | 17.70 | 17.96 | 17.57 | 2.74E-01 | 6.64E-01 | 1.00E+00 | 3.56E-01 | 6.83E-01 | 9.55E-01 | 3.78E-01 |
| 384.29921 | 277.14 | 16.66 | 16.05 | 16.54 | 16.49 | 8.93E-02 | 6.78E-02 | 9.59E-01 | 9.10E-01 | 2.18E-01 | 3.30E-01 | 9.98E-01 |
| 384.31283 | 242.84 | 17.66 | 17.46 | 17.86 | 17.06 | 8.59E-06 | 5.27E-01 | 5.27E-01 | 6.82E-04 | 4.26E-02 | 5.89E-02 | 3.76E-06 |
| 384.8207  | 77.36  | 15.06 | 14.36 | 16.10 | 16.03 | 6.72E-22 | 4.01E-04 | 2.37E-08 | 5.26E-07 | 4.15E-14 | 4.26E-14 | 9.82E-01 |
| 384.84086 | 56.6   | 16.08 | 15.42 | 17.08 | 16.81 | 2.27E-36 | 5.02E-08 | 4.24E-14 | 4.75E-09 | 5.11E-15 | 7.77E-15 | 8.63E-02 |
| 384.85193 | 80.78  | 16.64 | 14.81 | 15.68 | 16.30 | 1.54E-36 | 5.11E-15 | 2.73E-13 | 2.96E-02 | 7.34E-11 | 9.55E-15 | 9.16E-06 |
| 384.89085 | 49.23  | 15.07 | 15.41 | 14.91 | 14.82 | 3.45E-01 | 7.36E-01 | 9.62E-01 | 8.82E-01 | 4.53E-01 | 3.32E-01 | 9.94E-01 |
| 384.9142  | 35.6   | 18.48 | 19.50 | 19.25 | 19.42 | 2.88E-10 | 2.39E-09 | 8.46E-06 | 1.09E-07 | 3.77E-01 | 9.53E-01 | 7.28E-01 |
| 384.93609 | 42.57  | 19.31 | 21.79 | 21.68 | 21.66 | 4.07E-28 | 1.98E-14 | 3.02E-14 | 3.95E-14 | 9.59E-01 | 9.34E-01 | 9.99E-01 |
| 384.94723 | 20.42  | 13.07 | 15.30 | 15.40 | 14.30 | 7.76E-15 | 5.84E-12 | 5.11E-13 | 3.88E-04 | 9.88E-01 | 7.75E-03 | 2.42E-03 |
| 384.97231 | 38.82  | 15.49 | 13.65 | 13.25 | 14.46 | 1.95E-09 | 1.60E-06 | 3.25E-09 | 2.25E-02 | 6.88E-01 | 1.18E-01 | 5.64E-03 |

|           |        |       |       |       |       |           |          |          |          |          |          |          |
|-----------|--------|-------|-------|-------|-------|-----------|----------|----------|----------|----------|----------|----------|
| 384.98561 | 18.74  | 16.25 | 18.25 | 18.55 | 18.44 | 4.86E-35  | 1.15E-14 | 5.11E-15 | 5.77E-15 | 3.11E-01 | 7.04E-01 | 9.32E-01 |
| 384.99651 | 54.43  | 15.06 | 16.44 | 16.67 | 16.14 | 3.08E-05  | 6.06E-04 | 3.53E-05 | 1.49E-02 | 9.21E-01 | 8.51E-01 | 4.80E-01 |
| 385.01966 | 70.61  | 7.24  | 18.37 | 6.12  | 6.51  | 2.34E-111 | 5.11E-15 | 1.27E-03 | 8.98E-02 | 5.11E-15 | 5.11E-15 | 5.97E-01 |
| 385.04187 | 20.95  | 15.30 | 15.31 | 14.41 | 15.52 | 4.88E-02  | 1.00E+00 | 1.36E-01 | 9.49E-01 | 1.45E-01 | 9.60E-01 | 5.10E-02 |
| 385.06349 | 18.3   | 11.50 | 17.60 | 17.13 | 16.60 | 2.52E-52  | 5.11E-15 | 5.11E-15 | 5.11E-15 | 4.95E-01 | 2.24E-02 | 4.21E-01 |
| 385.1792  | 204.57 | 18.22 | 19.12 | 19.50 | 19.08 | 2.32E-15  | 1.44E-08 | 4.36E-14 | 1.35E-07 | 5.07E-02 | 9.94E-01 | 3.00E-02 |
| 385.19292 | 225.65 | 17.39 | 16.37 | 17.04 | 18.11 | 7.77E-44  | 1.98E-14 | 6.06E-04 | 2.96E-12 | 4.85E-11 | 5.11E-15 | 2.02E-14 |
| 385.20032 | 57.71  | 16.23 | 14.53 | 15.67 | 15.99 | 1.73E-05  | 1.20E-05 | 3.71E-01 | 9.11E-01 | 8.16E-03 | 5.35E-04 | 8.14E-01 |
| 385.23693 | 238.22 | 20.93 | 19.96 | 20.25 | 20.54 | 1.41E-23  | 1.42E-14 | 1.56E-13 | 5.97E-05 | 5.76E-03 | 2.72E-09 | 5.33E-03 |
| 385.26112 | 190.64 | 16.73 | 16.61 | 17.13 | 16.35 | 2.61E-03  | 9.37E-01 | 1.65E-01 | 2.47E-01 | 5.05E-02 | 5.91E-01 | 1.11E-03 |
| 385.3072  | 180.81 | 13.58 | 12.49 | 11.65 | 13.43 | 2.28E-08  | 5.91E-03 | 8.36E-08 | 9.66E-01 | 6.64E-02 | 3.87E-02 | 3.88E-06 |
| 385.31169 | 299.95 | 14.79 | 17.60 | 18.04 | 16.89 | 7.55E-18  | 5.25E-13 | 4.43E-14 | 1.23E-07 | 6.02E-01 | 2.30E-01 | 1.06E-02 |
| 385.92901 | 31.16  | 15.51 | 16.26 | 16.42 | 15.48 | 2.19E-07  | 7.52E-04 | 2.02E-05 | 9.99E-01 | 8.49E-01 | 9.07E-04 | 3.13E-05 |
| 385.9395  | 42.51  | 15.21 | 17.38 | 17.24 | 17.31 | 7.17E-24  | 4.13E-14 | 4.26E-14 | 4.27E-14 | 9.16E-01 | 9.90E-01 | 9.88E-01 |
| 386.02103 | 31.1   | 16.60 | 19.19 | 19.38 | 18.36 | 1.29E-53  | 5.11E-15 | 5.11E-15 | 7.99E-15 | 5.55E-01 | 7.92E-07 | 6.49E-10 |
| 386.03457 | 18.21  | 16.63 | 21.40 | 20.83 | 21.14 | 3.12E-65  | 5.11E-15 | 5.11E-15 | 5.11E-15 | 4.97E-02 | 6.82E-01 | 4.97E-01 |
| 386.0633  | 34.6   | 16.39 | 15.93 | 16.74 | 15.21 | 3.52E-03  | 6.71E-01 | 8.26E-01 | 2.59E-02 | 2.14E-01 | 3.35E-01 | 2.29E-03 |
| 386.14975 | 25.26  | 12.63 | 13.30 | 13.99 | 12.50 | 1.10E-07  | 5.59E-02 | 2.16E-06 | 9.68E-01 | 4.86E-02 | 2.39E-02 | 9.34E-07 |
| 386.18255 | 205.21 | 15.82 | 16.51 | 17.01 | 16.50 | 1.66E-11  | 6.25E-05 | 1.48E-12 | 1.55E-04 | 9.70E-03 | 1.00E+00 | 9.06E-03 |
| 386.23774 | 154.52 | 20.06 | 19.78 | 20.12 | 19.80 | 7.57E-02  | 2.76E-01 | 9.82E-01 | 3.69E-01 | 1.47E-01 | 9.99E-01 | 2.12E-01 |
| 386.23992 | 233.43 | 18.47 | 17.14 | 17.41 | 17.81 | 6.86E-28  | 5.33E-15 | 4.35E-14 | 3.67E-08 | 5.93E-02 | 3.79E-08 | 1.94E-03 |
| 386.27156 | 189.17 | 17.03 | 16.46 | 17.20 | 16.62 | 2.16E-03  | 3.55E-02 | 8.46E-01 | 2.29E-01 | 3.64E-03 | 8.87E-01 | 4.35E-02 |
| 386.2919  | 177.87 | 10.26 | 13.47 | 11.62 | 10.66 | 8.82E-12  | 1.29E-11 | 8.69E-03 | 8.03E-01 | 2.28E-04 | 1.83E-08 | 1.44E-01 |
| 386.31494 | 297    | 14.31 | 14.69 | 15.21 | 14.43 | 7.10E-03  | 4.85E-01 | 5.37E-03 | 9.72E-01 | 2.54E-01 | 7.90E-01 | 3.37E-02 |
| 386.32817 | 267.21 | 18.73 | 18.18 | 18.20 | 18.99 | 6.79E-05  | 2.55E-02 | 3.23E-02 | 5.54E-01 | 1.00E+00 | 5.63E-04 | 7.42E-04 |
| 386.80171 | 63.77  | 15.50 | 15.09 | 16.96 | 16.29 | 2.77E-41  | 1.97E-03 | 5.11E-15 | 4.54E-10 | 5.11E-15 | 4.17E-14 | 2.79E-07 |
| 386.81033 | 45.67  | 19.05 | 17.37 | 19.52 | 19.61 | 3.83E-44  | 5.33E-15 | 2.16E-03 | 3.05E-04 | 5.11E-15 | 5.11E-15 | 9.22E-01 |
| 386.83037 | 91.35  | 13.60 | 14.26 | 14.95 | 14.62 | 3.01E-15  | 1.33E-04 | 4.41E-14 | 4.05E-09 | 1.23E-04 | 1.33E-01 | 1.75E-01 |
| 386.87353 | 41.62  | 21.97 | 22.58 | 22.59 | 22.47 | 8.25E-13  | 2.30E-10 | 4.51E-11 | 5.36E-07 | 9.97E-01 | 6.16E-01 | 4.83E-01 |
| 386.91283 | 56.05  | 14.58 | 13.01 | 12.02 | 13.35 | 2.79E-05  | 1.35E-02 | 6.24E-06 | 9.57E-02 | 2.37E-01 | 9.22E-01 | 6.63E-02 |
| 386.9225  | 26.71  | 17.27 | 16.55 | 16.23 | 16.78 | 1.06E-06  | 8.16E-04 | 3.31E-07 | 5.34E-02 | 3.43E-01 | 6.42E-01 | 2.71E-02 |
| 386.9309  | 37.41  | 18.57 | 19.51 | 19.42 | 19.53 | 1.15E-19  | 4.51E-14 | 2.51E-13 | 4.32E-14 | 8.30E-01 | 9.98E-01 | 7.43E-01 |
| 386.94008 | 36.51  | 14.15 | 15.49 | 15.56 | 15.48 | 1.40E-14  | 7.17E-11 | 4.94E-12 | 3.20E-10 | 9.83E-01 | 1.00E+00 | 9.73E-01 |
| 386.98025 | 33.8   | 14.81 | 15.28 | 15.02 | 14.95 | 1.56E-01  | 1.06E-01 | 7.39E-01 | 9.18E-01 | 5.98E-01 | 4.18E-01 | 9.87E-01 |
| 387.03568 | 25.64  | 16.38 | 21.48 | 17.83 | 18.17 | 7.10E-64  | 5.11E-15 | 7.27E-11 | 6.08E-14 | 5.11E-15 | 5.11E-15 | 3.95E-01 |
| 387.11528 | 142.57 | 16.21 | 14.93 | 16.33 | 14.78 | 4.14E-05  | 6.98E-03 | 9.91E-01 | 2.49E-03 | 3.32E-03 | 9.82E-01 | 1.15E-03 |
| 387.16632 | 24.81  | 15.99 | 16.29 | 16.34 | 16.27 | 9.63E-02  | 2.03E-01 | 1.03E-01 | 2.67E-01 | 9.91E-01 | 1.00E+00 | 9.81E-01 |
| 387.17727 | 205.42 | 14.26 | 14.24 | 14.45 | 14.40 | 8.92E-01  | 1.00E+00 | 9.26E-01 | 9.74E-01 | 9.12E-01 | 9.65E-01 | 9.98E-01 |
| 387.19505 | 240.07 | 20.54 | 20.84 | 21.31 | 21.09 | 4.47E-22  | 1.10E-04 | 2.60E-14 | 4.44E-12 | 3.77E-09 | 6.82E-03 | 1.52E-02 |
| 387.19542 | 25.51  | 16.56 | 14.81 | 15.79 | 17.53 | 1.36E-08  | 1.27E-04 | 2.17E-01 | 9.36E-02 | 8.50E-02 | 6.06E-09 | 3.10E-04 |
| 387.21619 | 100.64 | 20.03 | 18.12 | 19.41 | 20.02 | 3.69E-14  | 7.90E-13 | 4.91E-02 | 1.00E+00 | 2.33E-06 | 1.25E-11 | 7.77E-02 |
| 387.24094 | 164.11 | 17.78 | 17.52 | 17.86 | 17.44 | 2.97E-02  | 3.54E-01 | 9.54E-01 | 1.46E-01 | 1.50E-01 | 9.56E-01 | 5.06E-02 |
| 387.25255 | 248.12 | 18.95 | 17.22 | 17.66 | 18.10 | 2.06E-40  | 5.11E-15 | 5.55E-15 | 4.67E-13 | 3.82E-04 | 5.71E-13 | 3.89E-04 |
| 387.27619 | 222.74 | 21.47 | 20.71 | 20.46 | 20.40 | 1.04E-06  | 1.97E-03 | 1.16E-05 | 6.73E-06 | 6.36E-01 | 4.84E-01 | 9.92E-01 |
| 387.28715 | 163.21 | 16.65 | 17.00 | 16.34 | 17.58 | 6.60E-05  | 5.28E-01 | 6.05E-01 | 2.65E-03 | 5.81E-02 | 1.36E-01 | 3.35E-05 |



|           |        |       |       |       |       |          |          |          |          |          |          |          |
|-----------|--------|-------|-------|-------|-------|----------|----------|----------|----------|----------|----------|----------|
| 387.87687 | 41.53  | 17.35 | 17.97 | 17.92 | 17.66 | 4.53E-09 | 3.46E-08 | 2.90E-07 | 1.78E-02 | 9.69E-01 | 2.34E-02 | 7.10E-02 |
| 387.96721 | 33.44  | 14.80 | 15.18 | 15.99 | 13.79 | 3.45E-07 | 7.14E-01 | 4.50E-03 | 2.91E-02 | 1.12E-01 | 1.44E-03 | 6.23E-08 |
| 388.03389 | 26.94  | 13.75 | 19.02 | 16.58 | 17.13 | 1.11E-51 | 5.11E-15 | 1.98E-14 | 5.11E-15 | 4.26E-14 | 1.13E-10 | 1.60E-01 |
| 388.12193 | 21.89  | 17.64 | 18.19 | 17.56 | 17.50 | 4.85E-08 | 3.04E-05 | 8.92E-01 | 6.00E-01 | 1.91E-06 | 3.10E-07 | 9.48E-01 |
| 388.19837 | 238.17 | 17.73 | 18.39 | 18.83 | 18.53 | 2.49E-36 | 4.40E-14 | 5.11E-15 | 3.04E-14 | 2.83E-08 | 2.72E-01 | 3.05E-04 |
| 388.19906 | 26.34  | 12.65 | 10.88 | 10.82 | 14.05 | 1.22E-09 | 3.30E-03 | 1.99E-03 | 4.06E-02 | 1.00E+00 | 8.18E-08 | 3.61E-08 |
| 388.21962 | 99.91  | 17.57 | 15.23 | 16.97 | 17.58 | 9.89E-14 | 2.70E-12 | 1.97E-01 | 1.00E+00 | 3.36E-07 | 2.32E-11 | 2.21E-01 |
| 388.23344 | 163.93 | 15.32 | 14.42 | 14.84 | 14.50 | 9.13E-05 | 1.35E-04 | 9.44E-02 | 1.04E-03 | 2.00E-01 | 9.79E-01 | 4.23E-01 |
| 388.25339 | 173.98 | 21.22 | 20.76 | 20.88 | 20.51 | 5.23E-03 | 8.19E-02 | 2.84E-01 | 2.44E-03 | 9.29E-01 | 6.22E-01 | 2.69E-01 |
| 388.25581 | 250.76 | 15.96 | 12.74 | 11.55 | 14.12 | 1.52E-17 | 2.84E-10 | 4.26E-14 | 8.42E-04 | 5.99E-02 | 2.78E-02 | 1.79E-06 |
| 388.27106 | 176.16 | 12.58 | 12.90 | 13.73 | 13.11 | 3.67E-04 | 6.31E-01 | 1.33E-04 | 2.18E-01 | 1.44E-02 | 8.79E-01 | 1.25E-01 |
| 388.27951 | 228.21 | 19.11 | 18.17 | 17.88 | 17.91 | 2.59E-07 | 4.86E-04 | 1.59E-06 | 6.50E-06 | 6.09E-01 | 7.02E-01 | 1.00E+00 |
| 388.28983 | 166.97 | 14.66 | 13.74 | 13.08 | 14.91 | 1.70E-09 | 7.77E-03 | 4.18E-07 | 8.30E-01 | 1.12E-01 | 7.68E-04 | 2.55E-08 |
| 388.30732 | 171.9  | 10.84 | 12.75 | 10.32 | 10.68 | 1.20E-11 | 1.26E-07 | 3.75E-01 | 9.61E-01 | 3.89E-11 | 5.05E-08 | 7.24E-01 |
| 388.81078 | 58.3   | 21.27 | 21.69 | 21.73 | 21.67 | 3.69E-08 | 4.72E-06 | 2.82E-07 | 2.39E-05 | 9.56E-01 | 9.96E-01 | 8.89E-01 |
| 388.83154 | 82.06  | 16.60 | 16.59 | 16.87 | 16.76 | 5.26E-02 | 1.00E+00 | 8.59E-02 | 5.19E-01 | 8.63E-02 | 5.01E-01 | 8.05E-01 |
| 388.85011 | 79.86  | 16.03 | 14.57 | 15.20 | 15.07 | 1.54E-20 | 3.29E-14 | 1.33E-08 | 2.15E-10 | 4.81E-05 | 3.18E-03 | 7.88E-01 |
| 388.87149 | 47.82  | 18.66 | 19.42 | 19.54 | 19.42 | 1.34E-12 | 1.09E-08 | 2.69E-11 | 2.24E-08 | 7.73E-01 | 1.00E+00 | 7.99E-01 |
| 388.88912 | 45.36  | 21.59 | 22.91 | 22.87 | 22.76 | 7.06E-47 | 5.11E-15 | 5.11E-15 | 5.11E-15 | 9.63E-01 | 2.79E-01 | 5.38E-01 |
| 388.9013  | 29.6   | 13.36 | 12.68 | 14.20 | 13.46 | 2.63E-04 | 1.63E-01 | 5.45E-02 | 9.92E-01 | 5.98E-05 | 1.14E-01 | 1.44E-01 |
| 388.9212  | 24.8   | 16.79 | 16.20 | 16.21 | 16.28 | 1.36E-03 | 4.01E-03 | 4.45E-03 | 2.05E-02 | 1.00E+00 | 9.75E-01 | 9.84E-01 |
| 389.03534 | 52.71  | 13.67 | 18.39 | 14.03 | 13.08 | 8.49E-38 | 5.11E-15 | 7.34E-01 | 3.41E-01 | 5.77E-15 | 5.11E-15 | 4.71E-02 |
| 389.0768  | 197.6  | 18.69 | 17.81 | 18.15 | 17.76 | 2.52E-50 | 5.11E-15 | 3.20E-14 | 5.11E-15 | 1.88E-09 | 8.25E-01 | 3.11E-11 |
| 389.07852 | 17.17  | 14.38 | 14.85 | 14.73 | 15.30 | 2.61E-02 | 3.75E-01 | 6.19E-01 | 1.20E-02 | 9.78E-01 | 4.51E-01 | 2.39E-01 |
| 389.12711 | 17.36  | 20.35 | 20.79 | 20.67 | 20.42 | 2.55E-02 | 3.44E-02 | 1.80E-01 | 9.77E-01 | 8.96E-01 | 1.29E-01 | 4.26E-01 |
| 389.1339  | 19.81  | 14.90 | 14.87 | 15.01 | 15.04 | 9.53E-01 | 1.00E+00 | 9.88E-01 | 9.76E-01 | 9.78E-01 | 9.62E-01 | 1.00E+00 |
| 389.16729 | 26.18  | 16.31 | 15.20 | 15.52 | 15.18 | 6.59E-11 | 2.62E-09 | 3.26E-05 | 3.71E-09 | 2.39E-01 | 1.00E+00 | 2.15E-01 |
| 389.19306 | 227.28 | 14.44 | 16.90 | 17.05 | 16.89 | 2.20E-23 | 4.09E-14 | 4.06E-14 | 4.40E-14 | 9.45E-01 | 1.00E+00 | 9.31E-01 |
| 389.19586 | 60.74  | 15.49 | 12.01 | 14.80 | 15.87 | 5.50E-11 | 4.51E-09 | 5.75E-01 | 8.99E-01 | 5.19E-06 | 6.65E-10 | 2.33E-01 |
| 389.21053 | 162.01 | 15.28 | 13.20 | 13.36 | 13.68 | 1.27E-29 | 6.00E-15 | 1.55E-14 | 4.26E-14 | 7.89E-01 | 3.68E-02 | 2.66E-01 |
| 389.2106  | 256.12 | 18.09 | 17.80 | 18.37 | 18.25 | 1.87E-04 | 1.09E-01 | 1.20E-01 | 5.99E-01 | 1.08E-04 | 5.04E-03 | 8.14E-01 |
| 389.21121 | 26.88  | 12.57 | 10.22 | 10.19 | 13.78 | 7.37E-10 | 4.33E-04 | 2.88E-04 | 1.83E-01 | 1.00E+00 | 1.42E-07 | 8.00E-08 |
| 389.23162 | 213.15 | 10.69 | 9.46  | 12.64 | 14.14 | 7.14E-11 | 2.18E-01 | 1.20E-02 | 1.82E-06 | 1.14E-05 | 2.20E-10 | 1.12E-01 |
| 389.24727 | 234.31 | 19.88 | 19.43 | 19.34 | 19.94 | 3.60E-02 | 2.56E-01 | 1.17E-01 | 9.96E-01 | 9.84E-01 | 2.03E-01 | 9.26E-02 |
| 389.25615 | 173.61 | 19.45 | 18.27 | 18.52 | 18.24 | 3.51E-10 | 1.73E-08 | 8.18E-06 | 1.74E-08 | 5.97E-01 | 9.99E-01 | 5.19E-01 |
| 389.29148 | 248.25 | 23.30 | 22.26 | 22.13 | 22.22 | 6.68E-23 | 4.24E-14 | 4.26E-14 | 4.34E-14 | 6.91E-01 | 9.88E-01 | 8.79E-01 |
| 389.30968 | 285.4  | 17.05 | 17.29 | 16.76 | 18.01 | 2.08E-12 | 4.02E-01 | 2.12E-01 | 1.91E-08 | 4.12E-03 | 5.84E-05 | 8.40E-13 |
| 389.81436 | 68.56  | 15.76 | 15.85 | 16.71 | 16.03 | 9.64E-18 | 8.21E-01 | 4.35E-14 | 6.10E-02 | 2.03E-13 | 3.70E-01 | 8.37E-09 |
| 389.89257 | 40.75  | 16.72 | 18.43 | 18.36 | 18.23 | 3.63E-46 | 5.11E-15 | 5.11E-15 | 5.11E-15 | 9.15E-01 | 2.93E-01 | 6.62E-01 |
| 389.96797 | 17.33  | 14.42 | 17.41 | 17.02 | 16.53 | 3.66E-45 | 5.11E-15 | 5.11E-15 | 9.33E-15 | 1.41E-01 | 1.83E-05 | 3.41E-02 |
| 390.05058 | 41.46  | 14.34 | 14.60 | 14.36 | 13.42 | 4.63E-03 | 8.51E-01 | 1.00E+00 | 3.04E-02 | 8.88E-01 | 3.56E-03 | 2.93E-02 |
| 390.07677 | 193.76 | 15.81 | 12.26 | 13.96 | 12.98 | 3.04E-18 | 4.22E-14 | 4.24E-06 | 7.95E-12 | 5.27E-05 | 2.43E-01 | 5.54E-02 |
| 390.11995 | 21.64  | 15.69 | 15.44 | 15.28 | 15.49 | 3.76E-01 | 7.22E-01 | 2.92E-01 | 8.47E-01 | 9.01E-01 | 9.97E-01 | 8.18E-01 |
| 390.21409 | 251.38 | 15.22 | 15.75 | 15.63 | 15.81 | 9.62E-02 | 1.61E-01 | 3.57E-01 | 1.11E-01 | 9.70E-01 | 9.96E-01 | 9.12E-01 |
| 390.23969 | 189.28 | 16.01 | 16.67 | 17.23 | 15.70 | 4.75E-12 | 6.24E-03 | 2.64E-08 | 4.38E-01 | 3.68E-02 | 4.47E-05 | 3.89E-11 |

|           |        |       |       |       |       |           |          |          |          |          |          |          |
|-----------|--------|-------|-------|-------|-------|-----------|----------|----------|----------|----------|----------|----------|
| 390.24921 | 174.65 | 16.47 | 15.78 | 15.90 | 15.77 | 3.64E-04  | 1.34E-03 | 1.06E-02 | 1.53E-03 | 9.24E-01 | 1.00E+00 | 9.09E-01 |
| 390.25059 | 234.28 | 16.81 | 16.38 | 15.92 | 16.95 | 5.16E-02  | 6.88E-01 | 1.02E-01 | 9.85E-01 | 6.60E-01 | 5.10E-01 | 6.00E-02 |
| 390.25986 | 169.35 | 15.78 | 14.70 | 14.86 | 15.04 | 3.00E-07  | 5.50E-07 | 1.87E-05 | 1.58E-03 | 8.67E-01 | 3.56E-01 | 8.02E-01 |
| 390.26888 | 177.98 | 20.70 | 20.36 | 20.47 | 19.78 | 5.95E-08  | 7.70E-02 | 3.64E-01 | 1.35E-08 | 8.61E-01 | 1.17E-03 | 4.71E-05 |
| 390.2954  | 251.76 | 21.16 | 20.12 | 20.10 | 20.03 | 1.51E-19  | 8.24E-14 | 4.95E-14 | 4.40E-14 | 9.98E-01 | 9.10E-01 | 9.57E-01 |
| 390.80922 | 68.79  | 19.32 | 19.51 | 19.98 | 19.55 | 1.95E-13  | 8.11E-02 | 7.90E-14 | 2.48E-02 | 1.36E-07 | 9.59E-01 | 3.34E-06 |
| 390.8265  | 57.7   | 21.23 | 21.21 | 22.00 | 21.60 | 5.25E-23  | 9.98E-01 | 4.14E-14 | 1.96E-05 | 4.22E-14 | 1.76E-05 | 5.63E-06 |
| 390.86425 | 69.47  | 15.76 | 14.03 | 15.13 | 15.36 | 5.72E-30  | 5.11E-15 | 4.99E-06 | 1.30E-02 | 6.39E-14 | 4.52E-14 | 2.78E-01 |
| 390.88175 | 28.96  | 15.24 | 14.60 | 16.95 | 12.65 | 1.20E-19  | 3.49E-01 | 7.00E-05 | 2.50E-09 | 5.49E-08 | 1.78E-05 | 3.53E-14 |
| 390.88854 | 39.83  | 18.57 | 19.88 | 19.87 | 19.83 | 1.38E-46  | 5.11E-15 | 5.11E-15 | 5.11E-15 | 9.99E-01 | 9.19E-01 | 9.60E-01 |
| 390.89349 | 44.03  | 13.96 | 15.13 | 15.03 | 14.93 | 1.93E-09  | 2.27E-08 | 2.99E-07 | 9.70E-06 | 9.50E-01 | 7.34E-01 | 9.56E-01 |
| 390.90201 | 31.25  | 17.44 | 19.07 | 19.15 | 19.03 | 1.02E-18  | 9.19E-14 | 4.40E-14 | 6.85E-13 | 9.77E-01 | 9.97E-01 | 9.33E-01 |
| 390.94345 | 48.81  | 16.58 | 14.18 | 15.01 | 14.61 | 3.13E-05  | 2.72E-05 | 1.16E-02 | 1.20E-03 | 3.84E-01 | 8.60E-01 | 8.72E-01 |
| 390.95345 | 21.05  | 14.74 | 14.57 | 14.19 | 14.81 | 1.39E-01  | 9.38E-01 | 2.00E-01 | 9.93E-01 | 5.32E-01 | 8.48E-01 | 1.45E-01 |
| 390.96421 | 26.26  | 19.90 | 19.91 | 20.01 | 20.05 | 5.98E-01  | 1.00E+00 | 8.28E-01 | 6.41E-01 | 8.88E-01 | 7.24E-01 | 9.86E-01 |
| 391.02157 | 206.08 | 16.21 | 15.97 | 16.06 | 15.88 | 2.97E-01  | 5.04E-01 | 8.12E-01 | 2.57E-01 | 9.58E-01 | 9.66E-01 | 7.69E-01 |
| 391.06803 | 55.52  | 11.44 | 17.45 | 10.88 | 10.84 | 4.83E-67  | 5.11E-15 | 1.92E-01 | 1.73E-01 | 5.11E-15 | 5.11E-15 | 9.99E-01 |
| 391.08983 | 53.81  | 15.64 | 18.93 | 14.75 | 15.05 | 4.00E-143 | 5.11E-15 | 5.11E-15 | 1.26E-13 | 5.11E-15 | 5.11E-15 | 1.76E-04 |
| 391.10485 | 24.48  | 15.51 | 17.75 | 17.40 | 16.33 | 1.77E-12  | 2.09E-11 | 1.03E-08 | 4.49E-02 | 6.80E-01 | 8.88E-05 | 4.83E-03 |
| 391.12422 | 17.46  | 18.56 | 18.95 | 18.88 | 18.55 | 2.48E-02  | 6.92E-02 | 1.89E-01 | 1.00E+00 | 9.67E-01 | 8.61E-02 | 2.16E-01 |
| 391.13416 | 41.34  | 14.83 | 16.21 | 15.88 | 15.73 | 9.27E-13  | 9.11E-13 | 3.45E-08 | 5.76E-06 | 2.57E-01 | 5.22E-02 | 8.56E-01 |
| 391.21332 | 69.43  | 18.86 | 18.13 | 18.84 | 19.12 | 6.77E-03  | 4.50E-02 | 1.00E+00 | 8.03E-01 | 6.53E-02 | 4.87E-03 | 7.63E-01 |
| 391.22622 | 179.1  | 18.48 | 17.16 | 17.43 | 17.42 | 7.65E-18  | 4.36E-14 | 1.68E-11 | 3.68E-11 | 2.33E-01 | 3.20E-01 | 9.99E-01 |
| 391.2263  | 285.49 | 11.84 | 17.09 | 17.24 | 16.60 | 5.32E-38  | 5.11E-15 | 5.11E-15 | 7.33E-15 | 9.83E-01 | 6.22E-01 | 3.93E-01 |
| 391.24804 | 212.19 | 17.91 | 17.20 | 17.21 | 18.12 | 1.25E-02  | 1.48E-01 | 1.52E-01 | 9.23E-01 | 1.00E+00 | 4.53E-02 | 4.64E-02 |
| 391.26292 | 252.14 | 21.25 | 20.89 | 20.51 | 21.16 | 3.03E-03  | 3.33E-01 | 2.57E-03 | 9.76E-01 | 2.76E-01 | 6.29E-01 | 1.76E-02 |
| 391.2722  | 184.33 | 18.40 | 17.97 | 18.14 | 17.47 | 3.24E-09  | 9.51E-03 | 2.12E-01 | 6.15E-10 | 6.19E-01 | 2.17E-03 | 1.59E-05 |
| 391.2862  | 39.67  | 15.78 | 15.59 | 15.07 | 15.61 | 2.52E-01  | 9.55E-01 | 2.05E-01 | 9.66E-01 | 5.00E-01 | 1.00E+00 | 5.00E-01 |
| 391.29762 | 250.85 | 17.89 | 16.29 | 16.22 | 16.36 | 1.20E-29  | 2.02E-14 | 7.99E-15 | 3.87E-14 | 9.57E-01 | 9.64E-01 | 7.61E-01 |
| 391.83027 | 67.04  | 16.31 | 15.36 | 16.84 | 16.44 | 6.11E-43  | 1.27E-14 | 1.89E-09 | 4.15E-01 | 5.11E-15 | 5.77E-15 | 2.34E-05 |
| 391.89929 | 18.98  | 13.52 | 16.53 | 16.51 | 16.62 | 4.73E-37  | 5.11E-15 | 5.11E-15 | 5.11E-15 | 1.00E+00 | 9.82E-01 | 9.74E-01 |
| 391.96718 | 28.22  | 15.38 | 16.20 | 16.69 | 15.88 | 5.71E-09  | 3.03E-04 | 1.25E-09 | 6.70E-02 | 7.50E-02 | 4.35E-01 | 7.72E-04 |
| 391.98812 | 85.04  | 13.63 | 14.25 | 14.85 | 14.88 | 9.53E-07  | 6.13E-02 | 8.10E-06 | 9.93E-06 | 8.73E-02 | 7.81E-02 | 9.99E-01 |
| 391.99766 | 18.68  | 14.89 | 15.94 | 15.60 | 15.61 | 2.26E-03  | 1.19E-03 | 5.00E-02 | 5.82E-02 | 6.38E-01 | 6.81E-01 | 1.00E+00 |
| 392.00731 | 20.31  | 15.65 | 17.13 | 16.86 | 17.18 | 5.08E-11  | 4.40E-09 | 1.71E-06 | 3.81E-09 | 6.46E-01 | 9.98E-01 | 5.46E-01 |
| 392.04095 | 24.15  | 15.80 | 13.39 | 12.43 | 14.10 | 4.77E-15  | 1.06E-08 | 4.27E-14 | 1.41E-04 | 6.90E-02 | 2.97E-01 | 2.51E-04 |
| 392.08944 | 23.77  | 19.15 | 19.33 | 19.61 | 19.62 | 1.20E-02  | 6.91E-01 | 2.70E-02 | 2.69E-02 | 3.49E-01 | 3.26E-01 | 1.00E+00 |
| 392.21691 | 86.49  | 15.96 | 15.35 | 16.02 | 16.33 | 2.42E-01  | 5.50E-01 | 9.99E-01 | 8.64E-01 | 4.88E-01 | 1.87E-01 | 9.18E-01 |
| 392.2295  | 173.61 | 16.15 | 14.23 | 14.61 | 14.86 | 2.27E-25  | 1.02E-14 | 4.44E-14 | 2.46E-12 | 1.02E-01 | 1.74E-03 | 4.66E-01 |
| 392.2661  | 252.1  | 18.77 | 18.20 | 17.79 | 18.61 | 2.33E-04  | 7.01E-02 | 2.18E-04 | 9.10E-01 | 3.37E-01 | 3.37E-01 | 5.55E-03 |
| 392.27753 | 194.4  | 15.99 | 14.91 | 15.04 | 14.50 | 2.30E-10  | 2.41E-06 | 4.14E-05 | 1.64E-10 | 9.15E-01 | 2.42E-01 | 5.87E-02 |
| 392.78778 | 94.77  | 13.15 | 12.56 | 13.13 | 13.58 | 1.31E-04  | 2.77E-02 | 1.00E+00 | 1.67E-01 | 4.16E-02 | 3.06E-05 | 1.51E-01 |
| 392.80715 | 80.12  | 15.19 | 14.88 | 15.58 | 15.16 | 2.06E-09  | 1.06E-02 | 4.56E-04 | 9.96E-01 | 2.13E-10 | 3.29E-02 | 4.36E-04 |
| 392.8184  | 61.15  | 17.12 | 15.25 | 16.34 | 17.13 | 6.99E-28  | 7.99E-15 | 5.50E-06 | 1.00E+00 | 7.24E-10 | 1.87E-14 | 1.46E-05 |
| 392.82505 | 52.52  | 18.97 | 19.08 | 19.85 | 19.46 | 4.20E-26  | 4.94E-01 | 1.04E-14 | 8.39E-09 | 4.37E-14 | 1.62E-05 | 1.04E-05 |

|           |        |       |       |       |       |           |          |          |          |          |          |          |
|-----------|--------|-------|-------|-------|-------|-----------|----------|----------|----------|----------|----------|----------|
| 392.87846 | 49.87  | 16.47 | 19.02 | 18.96 | 18.48 | 2.30E-38  | 5.11E-15 | 5.11E-15 | 2.60E-14 | 9.85E-01 | 2.13E-02 | 5.13E-02 |
| 392.90225 | 40.08  | 18.69 | 17.48 | 18.08 | 18.18 | 1.09E-05  | 1.80E-06 | 3.61E-02 | 1.29E-01 | 5.56E-02 | 2.26E-02 | 9.75E-01 |
| 392.923   | 46.13  | 17.84 | 18.76 | 19.23 | 18.99 | 3.62E-22  | 1.08E-10 | 3.29E-14 | 4.97E-14 | 2.38E-03 | 3.42E-01 | 2.73E-01 |
| 392.9442  | 43.85  | 14.38 | 12.77 | 11.73 | 14.84 | 4.77E-13  | 5.43E-04 | 1.89E-09 | 6.93E-01 | 6.24E-02 | 1.47E-05 | 2.81E-11 |
| 392.95281 | 29.64  | 13.11 | 14.16 | 14.07 | 14.03 | 7.22E-03  | 1.27E-02 | 2.63E-02 | 4.45E-02 | 9.93E-01 | 9.85E-01 | 1.00E+00 |
| 392.95993 | 25.82  | 15.75 | 15.41 | 15.33 | 15.60 | 1.16E-01  | 2.62E-01 | 1.16E-01 | 8.70E-01 | 9.81E-01 | 7.56E-01 | 5.20E-01 |
| 393.0101  | 19.46  | 16.70 | 18.63 | 18.14 | 17.76 | 6.76E-15  | 4.71E-14 | 2.37E-09 | 2.97E-05 | 1.31E-01 | 1.47E-03 | 3.72E-01 |
| 393.04376 | 51.52  | 15.32 | 23.94 | 16.81 | 15.90 | 1.05E-76  | 5.11E-15 | 2.10E-05 | 2.85E-01 | 5.11E-15 | 5.11E-15 | 3.18E-02 |
| 393.06865 | 47.11  | 15.39 | 19.50 | 14.33 | 14.62 | 3.69E-141 | 5.11E-15 | 6.00E-15 | 5.17E-14 | 5.11E-15 | 5.11E-15 | 1.07E-02 |
| 393.09285 | 24.24  | 15.64 | 15.04 | 15.27 | 15.78 | 7.75E-02  | 1.88E-01 | 5.96E-01 | 9.71E-01 | 8.75E-01 | 9.42E-02 | 3.72E-01 |
| 393.16137 | 82.9   | 13.04 | 10.85 | 14.12 | 14.83 | 3.91E-10  | 6.45E-04 | 2.11E-01 | 1.08E-02 | 1.80E-07 | 6.99E-10 | 6.15E-01 |
| 393.17231 | 158.86 | 16.35 | 16.44 | 15.46 | 16.86 | 4.47E-06  | 9.83E-01 | 2.93E-03 | 1.96E-01 | 1.17E-03 | 3.87E-01 | 1.81E-06 |
| 393.22916 | 68.86  | 15.37 | 14.41 | 15.12 | 16.19 | 5.32E-03  | 1.66E-01 | 9.47E-01 | 3.20E-01 | 4.41E-01 | 2.00E-03 | 1.27E-01 |
| 393.24187 | 174.51 | 18.48 | 18.99 | 19.13 | 18.21 | 1.28E-03  | 1.67E-01 | 4.15E-02 | 7.27E-01 | 9.45E-01 | 1.72E-02 | 2.75E-03 |
| 393.2612  | 250.4  | 19.40 | 18.81 | 18.39 | 19.27 | 1.74E-05  | 3.50E-02 | 2.35E-05 | 9.38E-01 | 2.20E-01 | 1.85E-01 | 7.02E-04 |
| 393.27815 | 283.6  | 19.90 | 20.26 | 20.27 | 20.46 | 1.64E-03  | 5.39E-02 | 3.92E-02 | 8.73E-04 | 1.00E+00 | 5.49E-01 | 6.01E-01 |
| 393.27871 | 22.5   | 16.32 | 14.53 | 13.78 | 14.26 | 1.74E-10  | 1.36E-05 | 2.32E-10 | 8.60E-07 | 1.91E-01 | 9.02E-01 | 5.91E-01 |
| 393.82917 | 41.64  | 14.13 | 10.02 | 13.43 | 13.79 | 5.51E-16  | 5.17E-14 | 4.46E-01 | 8.96E-01 | 2.03E-10 | 1.14E-11 | 8.89E-01 |
| 393.89401 | 35.38  | 14.26 | 13.47 | 13.66 | 14.05 | 2.06E-01  | 2.06E-01 | 4.40E-01 | 9.57E-01 | 9.66E-01 | 5.22E-01 | 7.93E-01 |
| 393.97868 | 27.45  | 10.97 | 13.59 | 14.40 | 12.85 | 5.05E-10  | 2.18E-06 | 2.71E-10 | 1.69E-03 | 3.86E-01 | 5.02E-01 | 1.78E-02 |
| 394.05133 | 62.35  | 9.97  | 20.90 | 7.86  | 8.17  | 2.77E-60  | 5.11E-15 | 3.05E-03 | 2.22E-02 | 5.11E-15 | 5.11E-15 | 9.61E-01 |
| 394.07229 | 66.7   | 14.26 | 15.63 | 12.66 | 13.20 | 1.30E-89  | 5.11E-15 | 5.11E-15 | 9.10E-15 | 5.11E-15 | 5.11E-15 | 9.55E-08 |
| 394.08441 | 26.16  | 13.94 | 13.83 | 14.45 | 14.22 | 1.74E-01  | 9.83E-01 | 3.08E-01 | 8.04E-01 | 1.75E-01 | 6.11E-01 | 8.73E-01 |
| 394.17551 | 150.17 | 14.01 | 13.67 | 12.31 | 14.14 | 1.02E-07  | 7.17E-01 | 1.39E-06 | 9.77E-01 | 2.77E-04 | 5.03E-01 | 7.81E-07 |
| 394.20968 | 63.44  | 12.91 | 15.93 | 10.94 | 11.60 | 7.45E-112 | 5.11E-15 | 5.11E-15 | 1.95E-14 | 5.11E-15 | 5.11E-15 | 2.84E-07 |
| 394.24487 | 168.05 | 16.45 | 16.45 | 16.57 | 15.95 | 1.46E-04  | 1.00E+00 | 8.16E-01 | 2.26E-03 | 8.06E-01 | 3.71E-03 | 1.19E-04 |
| 394.263   | 252.45 | 16.79 | 15.83 | 15.58 | 16.41 | 1.23E-03  | 1.88E-02 | 1.43E-03 | 6.71E-01 | 8.85E-01 | 3.32E-01 | 7.72E-02 |
| 394.28133 | 287.72 | 17.43 | 17.34 | 17.21 | 17.53 | 3.76E-01  | 9.58E-01 | 6.03E-01 | 9.51E-01 | 8.94E-01 | 7.50E-01 | 3.28E-01 |
| 394.75584 | 85.84  | 15.78 | 16.35 | 16.84 | 16.73 | 3.91E-12  | 8.08E-04 | 2.16E-11 | 5.98E-09 | 5.23E-03 | 5.68E-02 | 8.94E-01 |
| 394.80333 | 90.94  | 10.63 | 13.60 | 13.50 | 13.63 | 6.75E-17  | 4.49E-13 | 1.50E-12 | 8.97E-13 | 9.93E-01 | 1.00E+00 | 9.85E-01 |
| 394.81566 | 69.64  | 16.36 | 13.89 | 15.61 | 15.90 | 3.42E-51  | 5.11E-15 | 2.08E-08 | 1.98E-03 | 5.11E-15 | 5.11E-15 | 1.08E-01 |
| 394.82295 | 61.19  | 15.39 | 14.01 | 15.57 | 15.22 | 1.01E-24  | 4.14E-14 | 5.63E-01 | 6.00E-01 | 2.07E-14 | 7.03E-14 | 7.04E-02 |
| 394.83646 | 51.8   | 16.18 | 15.14 | 16.22 | 14.77 | 2.32E-06  | 4.89E-03 | 9.99E-01 | 8.35E-05 | 3.98E-03 | 6.75E-01 | 7.02E-05 |
| 394.86007 | 57.07  | 19.42 | 18.69 | 20.18 | 20.07 | 1.86E-34  | 2.62E-10 | 2.34E-11 | 3.20E-08 | 5.11E-15 | 5.77E-15 | 7.51E-01 |
| 394.88049 | 72.26  | 14.77 | 10.33 | 14.74 | 15.02 | 5.98E-21  | 4.39E-14 | 1.00E+00 | 9.55E-01 | 4.31E-14 | 4.35E-14 | 9.42E-01 |
| 394.89699 | 155.66 | 16.37 | 14.21 | 13.74 | 14.19 | 1.29E-10  | 5.43E-07 | 5.93E-10 | 8.52E-07 | 6.40E-01 | 1.00E+00 | 6.88E-01 |
| 394.95821 | 32.95  | 14.94 | 12.68 | 12.08 | 13.93 | 8.77E-15  | 2.71E-09 | 9.04E-14 | 2.46E-02 | 3.20E-01 | 4.16E-03 | 4.04E-06 |
| 395.04595 | 62.12  | 14.95 | 20.88 | 13.59 | 13.97 | 1.48E-164 | 5.11E-15 | 5.11E-15 | 4.46E-14 | 5.11E-15 | 5.11E-15 | 9.51E-04 |
| 395.05337 | 63.47  | 13.63 | 15.82 | 11.59 | 12.29 | 1.70E-120 | 5.11E-15 | 5.11E-15 | 5.11E-15 | 5.11E-15 | 5.11E-15 | 2.52E-12 |
| 395.08905 | 17.89  | 17.05 | 20.27 | 19.83 | 18.85 | 4.49E-23  | 3.24E-14 | 4.17E-14 | 7.08E-08 | 4.84E-01 | 5.90E-05 | 9.43E-03 |
| 395.22096 | 231.2  | 21.00 | 20.49 | 21.22 | 21.53 | 1.41E-28  | 4.24E-10 | 1.75E-02 | 3.68E-10 | 4.33E-14 | 5.11E-15 | 6.30E-04 |
| 395.24488 | 86.97  | 12.52 | 11.46 | 14.39 | 14.96 | 7.94E-07  | 3.71E-01 | 2.19E-02 | 1.91E-03 | 1.03E-04 | 4.87E-06 | 8.37E-01 |
| 395.24686 | 192.68 | 16.57 | 15.78 | 16.20 | 16.21 | 1.78E-03  | 4.92E-04 | 2.21E-01 | 2.83E-01 | 1.71E-01 | 1.70E-01 | 1.00E+00 |
| 395.25727 | 167.26 | 17.42 | 18.38 | 18.67 | 17.35 | 6.14E-05  | 1.86E-02 | 9.01E-04 | 9.97E-01 | 8.32E-01 | 1.65E-02 | 9.28E-04 |
| 395.27495 | 284.12 | 18.23 | 18.34 | 18.37 | 18.67 | 6.82E-02  | 9.07E-01 | 8.13E-01 | 4.29E-02 | 9.97E-01 | 2.16E-01 | 2.96E-01 |

|           |        |       |       |       |       |           |          |          |          |          |          |          |
|-----------|--------|-------|-------|-------|-------|-----------|----------|----------|----------|----------|----------|----------|
| 395.86347 | 47.62  | 14.81 | 12.82 | 15.06 | 15.15 | 1.03E-25  | 4.11E-14 | 6.07E-01 | 3.73E-01 | 3.38E-14 | 3.29E-14 | 9.76E-01 |
| 395.91433 | 31.54  | 14.71 | 15.49 | 15.45 | 15.13 | 3.13E-04  | 7.18E-04 | 1.23E-03 | 1.72E-01 | 9.98E-01 | 3.24E-01 | 4.10E-01 |
| 395.9579  | 34.08  | 17.87 | 18.79 | 18.93 | 18.29 | 4.92E-17  | 4.14E-12 | 4.40E-14 | 4.91E-03 | 6.85E-01 | 5.81E-04 | 4.89E-06 |
| 395.98111 | 36.36  | 13.47 | 14.77 | 14.37 | 16.52 | 7.78E-17  | 2.04E-04 | 1.69E-02 | 4.25E-14 | 5.96E-01 | 9.89E-07 | 1.21E-09 |
| 395.98775 | 50.4   | 12.91 | 13.30 | 15.09 | 13.03 | 1.28E-08  | 7.13E-01 | 5.66E-08 | 9.89E-01 | 2.13E-05 | 8.97E-01 | 1.35E-06 |
| 396.01973 | 24.73  | 16.65 | 15.74 | 15.86 | 16.02 | 9.07E-10  | 3.00E-09 | 2.49E-07 | 1.22E-04 | 8.24E-01 | 2.15E-01 | 6.81E-01 |
| 396.04763 | 35.3   | 15.77 | 17.96 | 16.19 | 15.18 | 2.51E-21  | 4.60E-14 | 3.18E-01 | 9.86E-02 | 2.26E-10 | 3.93E-14 | 7.56E-04 |
| 396.09201 | 17.01  | 14.11 | 16.65 | 15.98 | 15.55 | 2.98E-15  | 4.31E-14 | 2.04E-09 | 1.02E-05 | 1.00E-01 | 2.02E-03 | 4.95E-01 |
| 396.12466 | 19.17  | 13.82 | 18.41 | 11.52 | 12.29 | 1.93E-123 | 5.11E-15 | 5.11E-15 | 3.31E-14 | 5.11E-15 | 5.11E-15 | 1.32E-06 |
| 396.22415 | 231.11 | 18.89 | 18.30 | 19.08 | 19.38 | 1.64E-25  | 2.06E-10 | 8.21E-02 | 2.00E-07 | 4.24E-14 | 6.22E-15 | 5.14E-03 |
| 396.26043 | 168.18 | 15.49 | 15.65 | 16.04 | 15.16 | 1.90E-05  | 7.84E-01 | 5.52E-03 | 2.14E-01 | 9.75E-02 | 3.00E-02 | 5.20E-06 |
| 396.27816 | 272.5  | 15.85 | 15.72 | 16.32 | 15.78 | 5.48E-01  | 9.92E-01 | 7.11E-01 | 9.99E-01 | 5.54E-01 | 9.99E-01 | 6.55E-01 |
| 396.75346 | 85.69  | 15.16 | 15.22 | 15.72 | 15.55 | 3.27E-05  | 9.77E-01 | 1.09E-04 | 2.08E-02 | 8.93E-04 | 7.29E-02 | 5.68E-01 |
| 396.77168 | 75.96  | 15.65 | 15.40 | 16.32 | 16.21 | 5.96E-12  | 2.27E-01 | 3.09E-06 | 2.88E-04 | 3.41E-10 | 1.13E-07 | 8.36E-01 |
| 396.78261 | 82.08  | 15.34 | 15.29 | 15.78 | 15.51 | 8.66E-07  | 9.45E-01 | 1.39E-05 | 2.95E-01 | 2.10E-06 | 1.16E-01 | 2.35E-02 |
| 396.83183 | 39.01  | 15.52 | 15.80 | 14.64 | 14.88 | 2.06E-09  | 4.35E-01 | 1.60E-05 | 4.59E-03 | 2.12E-08 | 2.43E-05 | 6.03E-01 |
| 396.83905 | 50.96  | 17.04 | 15.86 | 18.12 | 17.93 | 3.51E-44  | 4.33E-14 | 9.68E-14 | 1.57E-09 | 5.11E-15 | 5.11E-15 | 5.05E-01 |
| 396.84747 | 29.7   | 15.53 | 16.39 | 16.88 | 15.88 | 2.38E-12  | 1.32E-05 | 2.42E-12 | 2.24E-01 | 3.39E-02 | 3.32E-02 | 8.74E-07 |
| 396.85672 | 80.2   | 17.89 | 16.18 | 17.48 | 17.37 | 4.23E-15  | 4.29E-14 | 1.33E-01 | 4.27E-02 | 1.98E-09 | 1.14E-07 | 9.49E-01 |
| 396.8676  | 30.2   | 14.78 | 13.45 | 14.17 | 13.86 | 2.40E-03  | 1.12E-03 | 3.01E-01 | 5.47E-02 | 1.86E-01 | 6.86E-01 | 8.31E-01 |
| 396.95076 | 30.68  | 15.32 | 15.33 | 15.12 | 14.89 | 6.89E-02  | 1.00E+00 | 6.80E-01 | 9.30E-02 | 6.50E-01 | 9.00E-02 | 6.05E-01 |
| 396.98285 | 57.64  | 13.92 | 14.56 | 16.53 | 16.45 | 6.63E-24  | 7.87E-02 | 4.45E-14 | 4.33E-14 | 2.34E-11 | 5.08E-10 | 9.92E-01 |
| 396.99495 | 17.33  | 13.84 | 15.01 | 14.72 | 14.29 | 6.48E-04  | 4.94E-04 | 1.33E-02 | 4.30E-01 | 7.75E-01 | 9.66E-02 | 4.96E-01 |
| 397.04098 | 19.59  | 15.51 | 16.00 | 16.59 | 16.44 | 6.44E-06  | 1.14E-01 | 8.77E-06 | 3.09E-04 | 4.80E-02 | 2.40E-01 | 9.17E-01 |
| 397.11579 | 23.78  | 17.25 | 19.52 | 19.66 | 18.76 | 8.36E-41  | 5.11E-15 | 5.11E-15 | 4.34E-14 | 8.13E-01 | 3.14E-05 | 4.45E-07 |
| 397.20545 | 208.71 | 15.59 | 15.17 | 15.22 | 15.40 | 1.71E-01  | 1.75E-01 | 2.80E-01 | 8.17E-01 | 9.94E-01 | 6.99E-01 | 8.37E-01 |
| 397.22673 | 169.35 | 17.96 | 18.10 | 17.71 | 18.80 | 2.37E-07  | 8.66E-01 | 4.96E-01 | 3.72E-05 | 1.48E-01 | 1.21E-03 | 9.36E-08 |
| 397.22678 | 288.13 | 13.36 | 17.78 | 18.38 | 16.60 | 1.22E-50  | 5.11E-15 | 5.11E-15 | 9.33E-15 | 1.32E-01 | 2.10E-04 | 6.17E-09 |
| 397.2367  | 242.96 | 19.29 | 18.98 | 19.35 | 19.29 | 1.55E-03  | 1.01E-02 | 9.32E-01 | 1.00E+00 | 1.74E-03 | 1.80E-02 | 9.33E-01 |
| 397.25995 | 222.48 | 19.64 | 19.32 | 19.29 | 19.32 | 3.74E-01  | 5.05E-01 | 4.25E-01 | 5.17E-01 | 9.99E-01 | 1.00E+00 | 1.00E+00 |
| 397.33298 | 293.33 | 13.14 | 15.65 | 15.87 | 15.53 | 8.10E-08  | 7.06E-06 | 6.64E-07 | 3.53E-05 | 9.73E-01 | 9.96E-01 | 9.17E-01 |
| 397.89525 | 36.79  | 16.30 | 16.27 | 16.30 | 15.51 | 1.22E-04  | 9.98E-01 | 1.00E+00 | 4.30E-04 | 9.98E-01 | 1.18E-03 | 5.77E-04 |
| 397.90452 | 37.65  | 17.09 | 18.64 | 19.04 | 18.21 | 4.13E-28  | 4.13E-14 | 5.33E-15 | 1.19E-10 | 6.10E-02 | 3.96E-02 | 3.45E-06 |
| 397.95304 | 34.81  | 14.57 | 14.33 | 14.63 | 14.05 | 7.67E-02  | 7.16E-01 | 9.95E-01 | 1.28E-01 | 5.83E-01 | 6.71E-01 | 8.39E-02 |
| 397.97977 | 56.8   | 14.90 | 16.64 | 18.01 | 17.17 | 2.27E-22  | 1.34E-08 | 1.98E-14 | 6.96E-13 | 1.41E-05 | 2.75E-01 | 2.06E-02 |
| 398.01787 | 18.81  | 15.96 | 16.55 | 16.43 | 16.70 | 2.39E-04  | 3.81E-03 | 2.89E-02 | 2.22E-04 | 9.10E-01 | 8.43E-01 | 4.52E-01 |
| 398.02707 | 18.65  | 14.80 | 16.17 | 16.02 | 16.32 | 4.56E-10  | 1.26E-07 | 1.96E-06 | 9.58E-09 | 9.36E-01 | 9.27E-01 | 6.32E-01 |
| 398.11911 | 23.37  | 13.25 | 15.06 | 15.36 | 14.16 | 1.60E-16  | 1.04E-11 | 4.61E-14 | 1.73E-03 | 6.17E-01 | 2.88E-03 | 2.26E-05 |
| 398.22977 | 159.29 | 15.49 | 15.22 | 14.65 | 16.14 | 1.13E-08  | 5.82E-01 | 6.57E-04 | 1.97E-02 | 5.27E-02 | 4.09E-04 | 1.91E-09 |
| 398.23993 | 249.54 | 16.67 | 16.03 | 16.22 | 16.43 | 4.40E-03  | 2.76E-03 | 6.16E-02 | 5.77E-01 | 7.30E-01 | 1.53E-01 | 6.78E-01 |
| 398.26354 | 222.6  | 17.32 | 16.71 | 16.76 | 16.79 | 1.38E-01  | 1.72E-01 | 2.22E-01 | 3.08E-01 | 9.99E-01 | 9.94E-01 | 9.99E-01 |
| 398.28205 | 245.34 | 16.68 | 13.26 | 13.34 | 12.83 | 5.66E-31  | 2.07E-14 | 2.60E-14 | 5.77E-15 | 9.94E-01 | 5.42E-01 | 3.79E-01 |
| 398.29169 | 146.95 | 15.13 | 14.32 | 14.45 | 14.26 | 2.08E-07  | 5.52E-06 | 1.78E-04 | 2.01E-06 | 8.48E-01 | 9.87E-01 | 6.72E-01 |
| 398.2918  | 257.82 | 16.43 | 15.49 | 14.81 | 14.89 | 9.51E-05  | 7.41E-02 | 1.78E-04 | 7.19E-04 | 3.00E-01 | 4.43E-01 | 9.97E-01 |
| 398.32802 | 192.74 | 14.19 | 17.84 | 17.79 | 16.52 | 2.84E-49  | 5.11E-15 | 5.11E-15 | 2.98E-14 | 9.94E-01 | 3.90E-08 | 1.15E-07 |

|           |        |       |       |       |       |           |          |          |          |          |          |          |
|-----------|--------|-------|-------|-------|-------|-----------|----------|----------|----------|----------|----------|----------|
| 398.76926 | 78.57  | 14.78 | 13.69 | 14.81 | 14.74 | 1.54E-11  | 1.76E-09 | 9.97E-01 | 9.95E-01 | 1.21E-09 | 4.25E-08 | 9.73E-01 |
| 398.79241 | 79.13  | 17.57 | 17.84 | 18.18 | 17.70 | 4.74E-08  | 3.80E-02 | 1.95E-08 | 6.03E-01 | 5.22E-03 | 5.33E-01 | 3.72E-05 |
| 398.83711 | 58.49  | 15.43 | 14.45 | 15.96 | 15.94 | 5.84E-16  | 4.98E-07 | 1.27E-02 | 2.55E-02 | 7.35E-14 | 4.28E-13 | 9.99E-01 |
| 398.84534 | 33.71  | 13.85 | 14.14 | 14.69 | 13.02 | 4.16E-05  | 8.19E-01 | 4.85E-02 | 6.46E-02 | 3.43E-01 | 7.30E-03 | 1.09E-05 |
| 398.84709 | 146.75 | 15.68 | 12.11 | 10.47 | 13.31 | 1.52E-19  | 1.19E-10 | 4.02E-14 | 4.73E-05 | 8.77E-03 | 1.11E-01 | 1.09E-06 |
| 398.85363 | 68.61  | 14.67 | 11.58 | 14.04 | 14.11 | 1.53E-10  | 1.84E-10 | 4.69E-01 | 5.98E-01 | 8.00E-07 | 9.19E-07 | 9.99E-01 |
| 398.88721 | 33.98  | 14.42 | 15.67 | 15.83 | 15.27 | 4.32E-07  | 1.74E-05 | 8.24E-07 | 9.44E-03 | 9.37E-01 | 4.59E-01 | 1.73E-01 |
| 398.92994 | 44.22  | 17.18 | 18.52 | 18.50 | 18.35 | 3.85E-20  | 4.34E-14 | 4.44E-14 | 1.22E-12 | 9.98E-01 | 6.89E-01 | 7.83E-01 |
| 398.95163 | 42.67  | 18.19 | 19.81 | 19.75 | 19.86 | 1.86E-19  | 5.17E-14 | 7.42E-14 | 4.69E-14 | 9.91E-01 | 9.92E-01 | 9.39E-01 |
| 398.98577 | 37.45  | 14.62 | 14.68 | 15.00 | 14.40 | 5.04E-01  | 9.99E-01 | 7.37E-01 | 9.44E-01 | 8.37E-01 | 8.99E-01 | 4.29E-01 |
| 399.04748 | 20.51  | 14.87 | 14.76 | 15.06 | 14.36 | 1.28E-01  | 9.79E-01 | 9.04E-01 | 3.02E-01 | 7.20E-01 | 5.48E-01 | 8.79E-02 |
| 399.05616 | 61.76  | 14.67 | 21.68 | 13.47 | 13.54 | 4.10E-127 | 5.11E-15 | 6.88E-11 | 2.66E-09 | 5.11E-15 | 5.11E-15 | 9.81E-01 |
| 399.12013 | 20.79  | 15.06 | 16.84 | 17.06 | 17.40 | 6.78E-16  | 2.30E-09 | 1.17E-11 | 7.53E-14 | 8.46E-01 | 2.05E-01 | 6.39E-01 |
| 399.15533 | 27.5   | 16.93 | 17.75 | 17.69 | 17.13 | 9.22E-05  | 5.63E-04 | 1.54E-03 | 7.89E-01 | 9.91E-01 | 2.40E-02 | 4.96E-02 |
| 399.2211  | 238.56 | 18.65 | 18.26 | 18.58 | 18.84 | 3.22E-05  | 3.12E-03 | 9.21E-01 | 3.62E-01 | 2.71E-02 | 1.06E-05 | 1.26E-01 |
| 399.25226 | 259.15 | 14.39 | 14.68 | 15.76 | 15.93 | 3.42E-03  | 9.30E-01 | 2.45E-02 | 1.18E-02 | 1.34E-01 | 7.32E-02 | 9.87E-01 |
| 399.27589 | 244.86 | 23.29 | 23.41 | 23.15 | 23.01 | 4.24E-01  | 9.58E-01 | 9.36E-01 | 6.63E-01 | 7.12E-01 | 3.87E-01 | 9.42E-01 |
| 399.90298 | 36.33  | 13.74 | 14.07 | 14.58 | 13.81 | 1.04E-02  | 6.14E-01 | 9.82E-03 | 9.96E-01 | 2.46E-01 | 7.87E-01 | 3.15E-02 |
| 399.91077 | 37.09  | 17.23 | 17.53 | 17.75 | 16.85 | 3.88E-03  | 6.07E-01 | 1.30E-01 | 4.32E-01 | 7.96E-01 | 4.39E-02 | 2.59E-03 |
| 399.95503 | 36.15  | 14.23 | 14.94 | 14.92 | 15.23 | 1.00E-03  | 2.35E-02 | 2.97E-02 | 6.69E-04 | 1.00E+00 | 6.89E-01 | 6.19E-01 |
| 399.97814 | 61.22  | 13.63 | 12.39 | 14.23 | 14.42 | 7.70E-18  | 1.18E-07 | 2.42E-02 | 1.93E-03 | 6.53E-14 | 4.29E-14 | 8.23E-01 |
| 400.00594 | 81.54  | 12.28 | 12.35 | 13.29 | 12.80 | 2.59E-01  | 9.99E-01 | 2.64E-01 | 7.97E-01 | 3.59E-01 | 8.72E-01 | 8.40E-01 |
| 400.01411 | 17.35  | 14.02 | 13.37 | 14.94 | 14.86 | 2.04E-04  | 3.40E-01 | 7.54E-02 | 1.47E-01 | 5.11E-04 | 1.79E-03 | 9.97E-01 |
| 400.05953 | 54.67  | 15.91 | 18.54 | 15.10 | 15.33 | 1.10E-127 | 5.11E-15 | 6.66E-15 | 6.78E-14 | 5.11E-15 | 5.11E-15 | 7.88E-03 |
| 400.27939 | 238.84 | 21.22 | 21.17 | 20.90 | 20.85 | 2.18E-01  | 9.96E-01 | 4.14E-01 | 3.18E-01 | 5.83E-01 | 4.71E-01 | 9.96E-01 |
| 400.2976  | 268.16 | 19.72 | 18.04 | 18.19 | 18.20 | 1.54E-33  | 5.11E-15 | 7.33E-15 | 1.42E-14 | 6.81E-01 | 6.51E-01 | 1.00E+00 |
| 400.3434  | 190.24 | 14.57 | 18.25 | 18.16 | 17.06 | 3.95E-74  | 5.11E-15 | 5.11E-15 | 5.11E-15 | 9.24E-01 | 2.27E-12 | 6.03E-11 |
| 400.78406 | 102.39 | 14.65 | 10.48 | 11.99 | 12.76 | 2.18E-12  | 3.79E-13 | 2.96E-06 | 2.70E-03 | 2.48E-02 | 2.53E-04 | 4.82E-01 |
| 400.78857 | 83.82  | 14.16 | 14.39 | 14.71 | 13.74 | 1.38E-03  | 7.54E-01 | 8.41E-02 | 3.08E-01 | 5.40E-01 | 4.51E-02 | 5.94E-04 |
| 400.82605 | 73.48  | 15.36 | 12.13 | 13.92 | 14.68 | 4.23E-31  | 5.11E-15 | 9.06E-09 | 2.16E-02 | 7.49E-12 | 4.06E-14 | 1.04E-02 |
| 400.86975 | 24.47  | 14.59 | 16.09 | 15.48 | 15.24 | 4.00E-09  | 5.50E-10 | 3.65E-04 | 2.34E-02 | 3.60E-02 | 1.74E-03 | 7.19E-01 |
| 400.88917 | 45.45  | 19.64 | 19.21 | 19.45 | 19.50 | 1.45E-03  | 4.92E-04 | 3.10E-01 | 6.14E-01 | 1.15E-01 | 4.76E-02 | 9.71E-01 |
| 400.91002 | 39.64  | 20.88 | 22.97 | 22.95 | 22.83 | 1.67E-38  | 5.11E-15 | 5.11E-15 | 5.33E-15 | 9.99E-01 | 8.16E-01 | 8.81E-01 |
| 400.94636 | 43.16  | 16.18 | 14.25 | 14.66 | 14.58 | 8.25E-07  | 1.61E-06 | 2.10E-04 | 1.49E-04 | 6.85E-01 | 8.32E-01 | 9.96E-01 |
| 400.99333 | 69.36  | 12.63 | 18.32 | 11.48 | 11.21 | 9.86E-81  | 5.11E-15 | 2.93E-05 | 3.70E-07 | 5.11E-15 | 5.11E-15 | 7.12E-01 |
| 401.02674 | 18.64  | 12.77 | 14.19 | 13.45 | 14.36 | 1.39E-03  | 6.74E-03 | 3.90E-01 | 2.56E-03 | 3.42E-01 | 9.84E-01 | 1.94E-01 |
| 401.05354 | 55.41  | 13.95 | 16.99 | 12.20 | 12.94 | 1.75E-73  | 5.11E-15 | 4.14E-14 | 2.76E-07 | 5.11E-15 | 5.11E-15 | 3.48E-04 |
| 401.16572 | 226.84 | 14.60 | 13.34 | 15.58 | 16.10 | 1.15E-15  | 2.88E-04 | 6.80E-03 | 1.47E-05 | 4.69E-11 | 4.95E-14 | 3.54E-01 |
| 401.17318 | 54.82  | 16.88 | 13.61 | 15.38 | 16.15 | 1.40E-09  | 4.77E-10 | 9.71E-03 | 4.44E-01 | 1.98E-03 | 6.10E-06 | 4.23E-01 |
| 401.21049 | 232.91 | 19.21 | 18.95 | 19.38 | 19.03 | 3.50E-03  | 1.39E-01 | 5.00E-01 | 4.56E-01 | 3.43E-03 | 9.28E-01 | 3.06E-02 |
| 401.23645 | 248.34 | 18.14 | 16.70 | 17.18 | 17.72 | 1.41E-11  | 1.39E-11 | 6.90E-06 | 1.54E-01 | 7.44E-02 | 7.01E-06 | 4.04E-02 |
| 401.28253 | 234.57 | 17.15 | 16.41 | 15.35 | 15.58 | 1.81E-03  | 4.60E-01 | 2.24E-03 | 1.37E-02 | 1.72E-01 | 3.96E-01 | 9.75E-01 |
| 401.29143 | 259.43 | 24.03 | 24.02 | 23.75 | 23.74 | 5.31E-01  | 1.00E+00 | 6.91E-01 | 7.00E-01 | 7.29E-01 | 7.35E-01 | 1.00E+00 |
| 401.90304 | 31.84  | 15.83 | 15.95 | 16.34 | 15.51 | 9.78E-02  | 9.82E-01 | 3.63E-01 | 7.57E-01 | 6.18E-01 | 5.53E-01 | 6.06E-02 |
| 401.91334 | 40.52  | 16.20 | 18.80 | 18.85 | 18.58 | 8.38E-33  | 5.77E-15 | 5.33E-15 | 2.69E-14 | 9.96E-01 | 7.52E-01 | 6.18E-01 |

|           |        |       |       |       |       |          |          |          |          |          |          |          |
|-----------|--------|-------|-------|-------|-------|----------|----------|----------|----------|----------|----------|----------|
| 401.9228  | 27.99  | 16.01 | 17.71 | 17.78 | 17.75 | 5.71E-33 | 7.77E-15 | 5.33E-15 | 9.33E-15 | 9.65E-01 | 9.97E-01 | 9.94E-01 |
| 401.94157 | 35.68  | 13.36 | 14.03 | 14.21 | 14.12 | 1.41E-03 | 2.57E-02 | 1.92E-03 | 1.02E-02 | 8.73E-01 | 9.82E-01 | 9.83E-01 |
| 401.99556 | 34.7   | 16.79 | 19.61 | 19.83 | 18.64 | 1.58E-67 | 5.11E-15 | 5.11E-15 | 5.11E-15 | 3.36E-01 | 7.72E-11 | 4.41E-14 |
| 402.11771 | 174.59 | 14.78 | 12.09 | 13.00 | 13.92 | 2.42E-17 | 4.10E-14 | 7.41E-09 | 1.75E-02 | 9.92E-03 | 2.50E-08 | 1.17E-02 |
| 402.16575 | 25.08  | 16.07 | 16.71 | 16.46 | 16.35 | 7.79E-03 | 3.20E-03 | 1.53E-01 | 4.38E-01 | 5.16E-01 | 2.52E-01 | 9.53E-01 |
| 402.21386 | 233.6  | 15.43 | 15.62 | 16.33 | 15.58 | 7.07E-02 | 9.58E-01 | 6.20E-02 | 9.81E-01 | 2.15E-01 | 1.00E+00 | 1.92E-01 |
| 402.2949  | 257.63 | 22.01 | 21.85 | 21.58 | 21.69 | 2.31E-01 | 8.74E-01 | 1.98E-01 | 4.80E-01 | 6.38E-01 | 9.05E-01 | 9.65E-01 |
| 402.31315 | 294.28 | 14.53 | 14.66 | 15.81 | 14.87 | 1.20E-02 | 9.89E-01 | 1.12E-02 | 8.55E-01 | 3.62E-02 | 9.65E-01 | 1.36E-01 |
| 402.80011 | 100.51 | 16.49 | 14.98 | 14.88 | 15.31 | 1.97E-22 | 4.40E-14 | 3.95E-14 | 2.65E-11 | 9.35E-01 | 1.90E-01 | 4.92E-02 |
| 402.8266  | 77.4   | 18.46 | 18.47 | 18.81 | 18.56 | 3.53E-05 | 9.99E-01 | 7.28E-05 | 6.34E-01 | 2.00E-04 | 7.21E-01 | 1.28E-02 |
| 402.84739 | 50.44  | 22.42 | 22.42 | 22.97 | 22.84 | 1.93E-16 | 1.00E+00 | 9.71E-13 | 1.87E-07 | 6.09E-12 | 5.93E-07 | 2.63E-01 |
| 402.86681 | 77.46  | 13.81 | 13.14 | 13.52 | 13.42 | 1.55E-01 | 1.01E-01 | 7.49E-01 | 5.49E-01 | 5.76E-01 | 8.08E-01 | 9.85E-01 |
| 402.88451 | 158.25 | 15.17 | 9.42  | 8.95  | 12.02 | 2.16E-30 | 1.20E-14 | 5.33E-15 | 1.66E-08 | 7.92E-01 | 7.34E-06 | 6.89E-08 |
| 402.89659 | 26.93  | 17.06 | 13.94 | 13.70 | 14.90 | 4.89E-16 | 1.26E-12 | 6.02E-14 | 1.83E-06 | 9.32E-01 | 1.04E-01 | 2.19E-02 |
| 402.90525 | 46.04  | 19.62 | 20.10 | 20.20 | 20.27 | 1.55E-11 | 1.90E-06 | 6.76E-09 | 2.90E-10 | 7.44E-01 | 3.09E-01 | 8.71E-01 |
| 402.91471 | 44.38  | 14.47 | 15.72 | 15.67 | 15.60 | 2.77E-16 | 2.36E-13 | 1.29E-12 | 8.92E-11 | 9.83E-01 | 8.65E-01 | 9.74E-01 |
| 402.9269  | 27.83  | 13.60 | 14.58 | 14.69 | 14.36 | 2.98E-05 | 4.00E-04 | 4.68E-05 | 1.32E-02 | 9.66E-01 | 8.21E-01 | 5.44E-01 |
| 402.99599 | 18.95  | 19.34 | 20.65 | 20.68 | 20.89 | 3.39E-17 | 1.29E-11 | 2.41E-12 | 5.15E-14 | 9.97E-01 | 5.57E-01 | 6.74E-01 |
| 403.01111 | 47.46  | 12.39 | 21.45 | 14.59 | 14.86 | 7.09E-44 | 5.11E-15 | 1.07E-04 | 2.34E-05 | 5.11E-15 | 6.00E-15 | 9.60E-01 |
| 403.0492  | 31.87  | 16.52 | 15.86 | 16.31 | 16.40 | 1.25E-03 | 7.07E-04 | 5.73E-01 | 8.96E-01 | 5.07E-02 | 1.48E-02 | 9.52E-01 |
| 403.14935 | 19.67  | 16.58 | 18.13 | 18.09 | 18.08 | 1.09E-22 | 4.21E-14 | 4.51E-14 | 4.26E-14 | 9.94E-01 | 9.92E-01 | 1.00E+00 |
| 403.18995 | 89.7   | 19.72 | 19.40 | 20.64 | 20.83 | 4.72E-09 | 5.31E-01 | 8.65E-04 | 6.06E-05 | 5.06E-06 | 2.62E-07 | 8.65E-01 |
| 403.22609 | 250.9  | 17.31 | 16.26 | 16.69 | 16.66 | 2.84E-11 | 3.86E-12 | 4.91E-05 | 3.67E-05 | 1.31E-02 | 3.31E-02 | 9.96E-01 |
| 403.25237 | 274.63 | 17.26 | 16.61 | 17.31 | 18.11 | 2.71E-04 | 1.68E-01 | 9.99E-01 | 4.47E-02 | 1.32E-01 | 6.01E-05 | 7.45E-02 |
| 403.27053 | 200.87 | 17.01 | 15.96 | 15.78 | 15.65 | 4.22E-16 | 2.16E-09 | 1.83E-12 | 1.07E-13 | 6.87E-01 | 2.53E-01 | 8.60E-01 |
| 403.28917 | 221.28 | 17.64 | 17.00 | 16.76 | 17.31 | 5.06E-06 | 1.54E-03 | 2.92E-06 | 2.35E-01 | 4.97E-01 | 3.43E-01 | 1.34E-02 |
| 403.29773 | 252.9  | 18.80 | 18.44 | 18.29 | 18.45 | 1.83E-01 | 4.44E-01 | 1.42E-01 | 4.77E-01 | 9.26E-01 | 1.00E+00 | 9.26E-01 |
| 403.30686 | 280.42 | 22.05 | 22.37 | 22.49 | 22.26 | 5.37E-03 | 5.56E-02 | 3.05E-03 | 3.79E-01 | 8.00E-01 | 8.28E-01 | 3.01E-01 |
| 403.30717 | 56.51  | 20.68 | 18.96 | 19.71 | 19.70 | 3.95E-20 | 3.24E-14 | 2.12E-08 | 4.07E-08 | 3.13E-05 | 8.87E-05 | 1.00E+00 |
| 403.85075 | 55.83  | 17.95 | 17.47 | 18.22 | 18.28 | 2.23E-14 | 9.06E-06 | 2.99E-02 | 6.13E-03 | 7.20E-12 | 8.50E-13 | 9.30E-01 |
| 403.9001  | 32.74  | 14.01 | 12.24 | 13.61 | 13.10 | 5.59E-03 | 3.33E-03 | 8.57E-01 | 2.98E-01 | 4.34E-02 | 3.84E-01 | 7.67E-01 |
| 403.90867 | 48.05  | 14.88 | 13.16 | 14.24 | 15.03 | 8.29E-12 | 5.52E-10 | 5.75E-02 | 9.41E-01 | 2.14E-04 | 1.75E-10 | 1.79E-02 |
| 404.01325 | 41.54  | 15.57 | 18.34 | 14.36 | 15.71 | 3.49E-19 | 2.66E-11 | 7.34E-03 | 9.85E-01 | 3.93E-14 | 1.80E-09 | 4.12E-03 |
| 404.04518 | 18.86  | 19.52 | 20.86 | 20.33 | 19.69 | 6.18E-06 | 1.05E-05 | 1.60E-02 | 9.28E-01 | 2.30E-01 | 3.94E-04 | 1.16E-01 |
| 404.05478 | 18.54  | 17.07 | 20.24 | 19.74 | 19.24 | 1.54E-19 | 4.37E-14 | 8.50E-14 | 2.24E-09 | 4.27E-01 | 1.85E-02 | 4.46E-01 |
| 404.12044 | 26.38  | 12.53 | 13.79 | 11.82 | 11.64 | 1.23E-14 | 7.79E-06 | 2.84E-02 | 4.73E-03 | 5.35E-12 | 4.58E-13 | 9.10E-01 |
| 404.13226 | 17.06  | 14.31 | 16.95 | 17.41 | 17.39 | 2.76E-21 | 2.31E-13 | 4.40E-14 | 4.35E-14 | 5.10E-01 | 5.60E-01 | 1.00E+00 |
| 404.19326 | 84.74  | 17.36 | 16.89 | 18.38 | 18.61 | 5.25E-10 | 2.88E-01 | 8.46E-04 | 4.97E-05 | 6.61E-07 | 2.54E-08 | 8.46E-01 |
| 404.26565 | 95.53  | 14.45 | 16.06 | 14.97 | 14.88 | 1.88E-06 | 5.39E-07 | 2.74E-01 | 4.64E-01 | 1.74E-03 | 9.83E-04 | 9.93E-01 |
| 404.2844  | 182.76 | 15.04 | 13.47 | 13.51 | 13.26 | 3.99E-12 | 9.68E-09 | 1.92E-08 | 2.51E-10 | 9.98E-01 | 8.61E-01 | 7.68E-01 |
| 404.30153 | 259.21 | 19.26 | 18.09 | 17.28 | 18.19 | 6.24E-31 | 8.19E-14 | 5.11E-15 | 1.08E-11 | 2.16E-07 | 9.07E-01 | 1.26E-08 |
| 404.31016 | 283.19 | 19.89 | 20.32 | 20.47 | 20.20 | 1.09E-04 | 5.92E-03 | 4.71E-05 | 9.18E-02 | 6.31E-01 | 8.25E-01 | 1.79E-01 |
| 404.7848  | 70.08  | 19.72 | 20.45 | 20.89 | 20.45 | 2.58E-18 | 1.05E-08 | 4.21E-14 | 2.20E-08 | 1.67E-03 | 1.00E+00 | 2.49E-03 |
| 404.79771 | 93.22  | 14.82 | 13.59 | 13.51 | 14.01 | 3.60E-08 | 1.19E-06 | 1.68E-07 | 3.88E-03 | 9.88E-01 | 3.03E-01 | 1.62E-01 |
| 404.80565 | 76.16  | 17.23 | 17.83 | 18.28 | 17.84 | 3.15E-19 | 5.52E-08 | 3.75E-14 | 1.02E-07 | 9.86E-05 | 1.00E+00 | 1.78E-04 |

|           |        |       |       |       |       |           |          |          |          |          |          |          |
|-----------|--------|-------|-------|-------|-------|-----------|----------|----------|----------|----------|----------|----------|
| 404.82478 | 83.64  | 16.19 | 15.90 | 16.39 | 16.08 | 3.24E-06  | 5.87E-03 | 1.12E-01 | 6.19E-01 | 8.53E-07 | 2.06E-01 | 5.65E-03 |
| 404.8477  | 41.07  | 20.15 | 19.82 | 20.24 | 20.53 | 1.06E-02  | 3.40E-01 | 9.73E-01 | 2.45E-01 | 1.70E-01 | 4.35E-03 | 4.85E-01 |
| 404.86289 | 45.27  | 22.00 | 22.77 | 23.12 | 22.98 | 5.08E-53  | 5.11E-15 | 5.11E-15 | 5.11E-15 | 2.88E-08 | 3.16E-03 | 7.63E-02 |
| 404.87219 | 31.23  | 13.26 | 12.94 | 14.14 | 12.19 | 9.00E-06  | 8.08E-01 | 6.10E-02 | 1.96E-02 | 5.88E-03 | 1.91E-01 | 2.14E-06 |
| 404.89981 | 41.13  | 17.59 | 16.65 | 16.92 | 16.85 | 6.88E-08  | 6.90E-08 | 1.69E-04 | 5.41E-05 | 3.44E-01 | 6.24E-01 | 9.77E-01 |
| 404.99994 | 23.21  | 15.27 | 16.77 | 16.82 | 17.06 | 4.12E-17  | 1.87E-11 | 2.97E-12 | 5.11E-14 | 9.96E-01 | 5.17E-01 | 6.50E-01 |
| 405.00734 | 67.69  | 16.40 | 18.74 | 15.72 | 15.89 | 4.59E-121 | 5.11E-15 | 3.53E-14 | 2.87E-12 | 5.11E-15 | 5.11E-15 | 5.47E-02 |
| 405.02724 | 48.68  | 14.27 | 14.24 | 13.88 | 13.01 | 2.49E-03  | 1.00E+00 | 6.76E-01 | 3.01E-03 | 7.50E-01 | 5.61E-03 | 8.36E-02 |
| 405.04865 | 21.46  | 17.06 | 19.03 | 18.77 | 18.53 | 2.81E-27  | 7.55E-15 | 4.06E-14 | 4.77E-14 | 3.89E-01 | 2.32E-02 | 5.34E-01 |
| 405.12655 | 61.76  | 13.17 | 15.97 | 11.00 | 11.80 | 1.17E-82  | 5.11E-15 | 5.11E-15 | 7.80E-14 | 5.11E-15 | 5.11E-15 | 1.62E-05 |
| 405.18755 | 80.09  | 15.38 | 14.29 | 16.11 | 16.47 | 3.28E-11  | 1.45E-03 | 5.68E-02 | 1.78E-03 | 2.71E-08 | 1.12E-10 | 6.36E-01 |
| 405.20507 | 110.41 | 11.79 | 13.36 | 15.27 | 15.56 | 1.01E-11  | 1.97E-02 | 2.93E-09 | 5.26E-10 | 3.63E-03 | 8.57E-04 | 9.55E-01 |
| 405.20609 | 19.72  | 16.63 | 15.14 | 15.90 | 17.63 | 4.91E-08  | 8.31E-04 | 2.23E-01 | 5.67E-02 | 2.20E-01 | 2.33E-08 | 1.44E-04 |
| 405.28664 | 233.48 | 19.99 | 19.25 | 19.47 | 19.20 | 9.68E-06  | 7.45E-05 | 1.02E-02 | 3.86E-05 | 5.46E-01 | 9.94E-01 | 4.06E-01 |
| 405.30499 | 237.87 | 17.37 | 17.14 | 15.81 | 16.34 | 2.56E-02  | 9.77E-01 | 2.86E-02 | 2.80E-01 | 9.83E-02 | 5.30E-01 | 8.10E-01 |
| 405.31309 | 287.02 | 17.36 | 17.03 | 16.87 | 16.58 | 2.12E-04  | 2.13E-01 | 2.33E-02 | 7.21E-05 | 8.15E-01 | 6.11E-02 | 3.41E-01 |
| 405.78798 | 78.72  | 13.51 | 14.26 | 15.30 | 14.79 | 5.22E-12  | 8.94E-03 | 2.39E-12 | 1.40E-06 | 1.08E-04 | 1.34E-01 | 1.63E-01 |
| 405.84859 | 63.66  | 14.89 | 14.65 | 14.60 | 14.52 | 3.89E-01  | 6.90E-01 | 5.56E-01 | 3.64E-01 | 9.97E-01 | 9.48E-01 | 9.84E-01 |
| 405.86633 | 52.77  | 17.47 | 18.17 | 18.69 | 18.47 | 2.04E-50  | 2.62E-14 | 5.11E-15 | 5.11E-15 | 2.68E-13 | 5.66E-05 | 5.49E-03 |
| 406.01929 | 33.03  | 17.72 | 17.10 | 16.93 | 17.72 | 8.38E-03  | 1.27E-01 | 2.71E-02 | 1.00E+00 | 9.38E-01 | 1.58E-01 | 3.94E-02 |
| 406.04096 | 18.62  | 15.82 | 16.67 | 16.11 | 15.88 | 4.86E-03  | 4.65E-03 | 6.45E-01 | 9.96E-01 | 1.32E-01 | 1.64E-02 | 8.12E-01 |
| 406.05023 | 18.84  | 13.96 | 15.91 | 15.34 | 14.67 | 4.92E-07  | 3.00E-07 | 4.43E-04 | 1.88E-01 | 3.69E-01 | 4.43E-03 | 2.54E-01 |
| 406.06736 | 18.36  | 14.40 | 16.34 | 16.14 | 15.87 | 8.27E-13  | 1.46E-11 | 8.28E-10 | 6.32E-07 | 8.83E-01 | 3.31E-01 | 7.56E-01 |
| 406.07673 | 18.34  | 13.43 | 15.80 | 15.44 | 16.09 | 7.34E-16  | 5.08E-12 | 3.19E-09 | 1.08E-13 | 6.66E-01 | 8.20E-01 | 1.95E-01 |
| 406.2424  | 171.3  | 16.20 | 14.56 | 14.86 | 15.32 | 1.18E-10  | 1.92E-10 | 1.60E-07 | 1.93E-03 | 5.95E-01 | 1.21E-02 | 2.33E-01 |
| 406.27311 | 197.42 | 14.69 | 13.65 | 13.52 | 13.88 | 2.12E-05  | 3.30E-04 | 3.22E-05 | 1.19E-02 | 9.59E-01 | 8.15E-01 | 5.14E-01 |
| 406.28991 | 286.68 | 17.89 | 18.24 | 18.33 | 18.28 | 3.15E-04  | 9.77E-03 | 4.49E-04 | 4.36E-03 | 8.47E-01 | 9.89E-01 | 9.65E-01 |
| 406.78292 | 70.09  | 18.00 | 18.75 | 19.30 | 18.78 | 4.09E-23  | 6.39E-10 | 9.77E-15 | 5.03E-10 | 1.64E-05 | 9.97E-01 | 6.93E-05 |
| 406.80035 | 66.79  | 19.99 | 20.45 | 21.13 | 20.71 | 2.57E-20  | 1.49E-04 | 3.33E-14 | 2.51E-09 | 1.37E-08 | 1.04E-01 | 1.16E-03 |
| 406.8241  | 88.33  | 14.19 | 13.49 | 13.35 | 14.07 | 2.18E-05  | 2.31E-03 | 1.43E-04 | 9.26E-01 | 9.08E-01 | 2.84E-02 | 3.41E-03 |
| 406.83982 | 64.78  | 15.88 | 14.23 | 15.49 | 15.26 | 2.27E-28  | 5.11E-15 | 9.57E-03 | 1.60E-05 | 4.40E-14 | 1.45E-12 | 3.10E-01 |
| 406.8623  | 48.48  | 19.59 | 20.30 | 20.75 | 20.58 | 2.35E-52  | 7.11E-15 | 5.11E-15 | 5.11E-15 | 1.25E-11 | 1.17E-04 | 2.29E-02 |
| 406.87592 | 36.2   | 18.77 | 19.92 | 20.02 | 19.90 | 7.19E-30  | 2.53E-14 | 6.88E-15 | 3.74E-14 | 8.16E-01 | 9.96E-01 | 6.98E-01 |
| 406.89369 | 28.13  | 15.26 | 17.18 | 16.73 | 16.89 | 1.21E-15  | 6.07E-14 | 2.00E-09 | 1.41E-10 | 2.09E-01 | 6.16E-01 | 9.06E-01 |
| 406.91759 | 49.27  | 16.66 | 14.12 | 14.78 | 15.16 | 2.60E-09  | 1.23E-09 | 7.72E-06 | 9.06E-04 | 3.24E-01 | 5.08E-02 | 7.82E-01 |
| 406.93808 | 28.66  | 18.13 | 16.56 | 16.66 | 17.07 | 1.10E-05  | 3.11E-05 | 9.49E-05 | 1.26E-02 | 9.91E-01 | 4.79E-01 | 6.53E-01 |
| 406.96778 | 21.9   | 15.31 | 18.34 | 18.63 | 17.78 | 6.35E-44  | 5.11E-15 | 5.11E-15 | 7.99E-15 | 4.94E-01 | 4.43E-02 | 4.37E-04 |
| 406.98001 | 30.97  | 16.34 | 16.30 | 16.17 | 16.16 | 1.96E-01  | 9.88E-01 | 3.43E-01 | 2.96E-01 | 5.66E-01 | 5.01E-01 | 9.99E-01 |
| 407.0638  | 54.56  | 15.97 | 18.71 | 15.22 | 15.44 | 4.63E-151 | 5.11E-15 | 5.11E-15 | 4.31E-14 | 5.11E-15 | 5.11E-15 | 6.29E-04 |
| 407.10031 | 23.65  | 17.12 | 17.62 | 18.06 | 17.51 | 5.56E-05  | 5.15E-02 | 1.14E-05 | 2.06E-01 | 1.20E-01 | 9.50E-01 | 3.63E-02 |
| 407.10856 | 47.83  | 10.96 | 15.25 | 14.64 | 14.56 | 1.61E-31  | 5.11E-15 | 2.18E-14 | 3.84E-14 | 2.67E-01 | 1.99E-01 | 9.96E-01 |
| 407.18752 | 168.56 | 13.38 | 12.97 | 11.98 | 13.64 | 5.18E-05  | 6.44E-01 | 5.05E-04 | 8.88E-01 | 3.43E-02 | 2.69E-01 | 6.66E-05 |
| 407.2062  | 30.73  | 14.97 | 14.24 | 13.96 | 15.53 | 2.81E-03  | 3.30E-01 | 8.58E-02 | 5.96E-01 | 9.18E-01 | 2.66E-02 | 3.46E-03 |
| 407.22086 | 178.15 | 16.13 | 14.08 | 13.65 | 13.96 | 3.32E-31  | 3.69E-14 | 5.11E-15 | 2.86E-14 | 1.37E-01 | 9.41E-01 | 4.18E-01 |
| 407.24584 | 171.3  | 14.01 | 11.42 | 12.09 | 12.06 | 1.55E-08  | 1.54E-08 | 3.45E-05 | 5.01E-05 | 3.93E-01 | 4.67E-01 | 1.00E+00 |

|           |        |       |       |       |       |           |          |          |          |          |          |          |
|-----------|--------|-------|-------|-------|-------|-----------|----------|----------|----------|----------|----------|----------|
| 407.29583 | 272.15 | 17.57 | 16.76 | 17.29 | 17.40 | 2.50E-02  | 1.57E-02 | 7.21E-01 | 9.31E-01 | 2.20E-01 | 1.10E-01 | 9.78E-01 |
| 407.31693 | 191.41 | 13.71 | 15.32 | 15.68 | 14.84 | 1.38E-12  | 1.16E-08 | 2.06E-12 | 1.60E-04 | 5.11E-01 | 2.90E-01 | 1.04E-02 |
| 407.80381 | 70.87  | 14.79 | 14.12 | 15.68 | 15.29 | 5.12E-13  | 2.86E-03 | 2.61E-05 | 5.60E-02 | 4.02E-13 | 1.24E-07 | 2.05E-01 |
| 407.8674  | 38.52  | 14.48 | 14.99 | 15.20 | 15.13 | 6.82E-02  | 3.13E-01 | 6.95E-02 | 1.44E-01 | 8.99E-01 | 9.70E-01 | 9.96E-01 |
| 407.96203 | 81.93  | 13.34 | 15.44 | 15.36 | 15.90 | 4.54E-16  | 6.96E-11 | 2.57E-10 | 5.95E-14 | 9.92E-01 | 4.38E-01 | 2.81E-01 |
| 408.09347 | 24.14  | 14.33 | 15.81 | 16.78 | 16.03 | 6.43E-24  | 1.00E-10 | 9.33E-15 | 6.20E-13 | 5.40E-05 | 7.49E-01 | 4.11E-03 |
| 408.1493  | 23.99  | 16.38 | 16.64 | 16.63 | 16.24 | 5.56E-01  | 8.39E-01 | 8.54E-01 | 9.74E-01 | 1.00E+00 | 6.26E-01 | 6.43E-01 |
| 408.22206 | 138.66 | 14.90 | 13.98 | 14.08 | 13.91 | 1.51E-03  | 6.50E-03 | 1.85E-02 | 3.85E-03 | 9.84E-01 | 9.95E-01 | 9.37E-01 |
| 408.25216 | 191.79 | 17.39 | 16.77 | 16.73 | 16.13 | 8.37E-11  | 9.21E-04 | 2.97E-04 | 6.48E-12 | 9.95E-01 | 1.46E-03 | 3.10E-03 |
| 408.78104 | 78.11  | 14.73 | 14.50 | 15.36 | 14.70 | 7.47E-07  | 4.35E-01 | 2.61E-04 | 9.96E-01 | 5.69E-07 | 6.23E-01 | 2.58E-04 |
| 408.79226 | 64.32  | 17.42 | 15.62 | 17.60 | 17.70 | 2.58E-34  | 7.55E-15 | 6.32E-01 | 2.92E-01 | 5.11E-15 | 5.11E-15 | 9.31E-01 |
| 408.79931 | 64.45  | 17.64 | 18.17 | 19.10 | 18.58 | 1.96E-21  | 6.00E-04 | 2.66E-14 | 4.65E-10 | 5.45E-10 | 2.09E-02 | 1.47E-03 |
| 408.85282 | 52.37  | 16.80 | 18.04 | 18.73 | 18.34 | 2.83E-16  | 1.49E-07 | 4.39E-14 | 2.08E-10 | 1.02E-02 | 5.60E-01 | 3.01E-01 |
| 408.87598 | 148.44 | 17.13 | 15.08 | 14.60 | 15.63 | 6.87E-42  | 5.11E-15 | 5.11E-15 | 4.37E-14 | 1.16E-02 | 3.85E-03 | 3.25E-09 |
| 408.89671 | 53.13  | 17.30 | 17.48 | 18.52 | 18.24 | 7.85E-19  | 5.22E-01 | 4.33E-14 | 7.51E-10 | 1.04E-11 | 1.87E-06 | 2.00E-01 |
| 408.93395 | 35.25  | 15.98 | 16.17 | 15.33 | 15.58 | 5.44E-02  | 9.42E-01 | 1.78E-01 | 6.17E-01 | 5.81E-02 | 3.16E-01 | 8.83E-01 |
| 409.01527 | 49.51  | 15.37 | 15.24 | 17.28 | 17.08 | 4.27E-18  | 9.59E-01 | 5.41E-12 | 2.39E-09 | 1.05E-12 | 4.42E-10 | 8.71E-01 |
| 409.0429  | 64.18  | 14.50 | 20.99 | 12.88 | 13.34 | 3.13E-158 | 5.11E-15 | 5.11E-15 | 4.07E-14 | 5.11E-15 | 5.11E-15 | 8.84E-04 |
| 409.1087  | 171.43 | 16.62 | 15.95 | 15.95 | 16.18 | 8.18E-16  | 3.01E-13 | 1.81E-13 | 2.96E-06 | 1.00E+00 | 4.64E-02 | 4.10E-02 |
| 409.14625 | 144.45 | 13.19 | 16.16 | 15.11 | 15.21 | 9.74E-10  | 2.89E-10 | 5.98E-05 | 4.74E-05 | 8.07E-02 | 1.52E-01 | 9.97E-01 |
| 409.18691 | 65.26  | 14.43 | 16.18 | 13.08 | 13.46 | 8.83E-80  | 5.11E-15 | 5.11E-15 | 4.31E-14 | 5.11E-15 | 5.11E-15 | 3.54E-03 |
| 409.19784 | 99.91  | 15.10 | 10.73 | 13.39 | 14.37 | 1.21E-24  | 9.77E-15 | 3.39E-05 | 2.24E-01 | 1.34E-10 | 4.15E-14 | 5.93E-02 |
| 409.23679 | 227.44 | 19.90 | 18.14 | 18.89 | 19.33 | 1.31E-41  | 5.11E-15 | 4.20E-14 | 6.90E-07 | 3.91E-11 | 2.31E-14 | 2.62E-04 |
| 409.25867 | 191.63 | 15.80 | 14.66 | 14.56 | 14.90 | 1.26E-10  | 3.14E-08 | 9.43E-10 | 2.43E-05 | 9.43E-01 | 6.48E-01 | 3.13E-01 |
| 409.30787 | 165.43 | 12.87 | 11.74 | 11.58 | 11.77 | 6.23E-04  | 6.30E-03 | 1.05E-03 | 1.07E-02 | 9.66E-01 | 1.00E+00 | 9.50E-01 |
| 409.95275 | 32.7   | 12.66 | 14.16 | 15.06 | 14.22 | 4.51E-09  | 2.57E-04 | 8.95E-10 | 2.07E-04 | 7.19E-02 | 9.99E-01 | 1.19E-01 |
| 409.97406 | 31.48  | 15.37 | 15.53 | 15.59 | 15.41 | 5.67E-01  | 8.01E-01 | 5.77E-01 | 9.97E-01 | 9.85E-01 | 9.12E-01 | 7.45E-01 |
| 410.04657 | 65.78  | 15.35 | 17.64 | 14.31 | 14.64 | 5.01E-130 | 5.11E-15 | 5.11E-15 | 2.46E-14 | 5.11E-15 | 5.11E-15 | 4.37E-06 |
| 410.112   | 171.79 | 14.49 | 12.91 | 12.86 | 12.93 | 4.20E-26  | 4.00E-14 | 3.44E-14 | 4.20E-14 | 9.87E-01 | 1.00E+00 | 9.76E-01 |
| 410.12845 | 23.02  | 19.63 | 19.60 | 19.96 | 19.96 | 4.87E-02  | 9.99E-01 | 1.83E-01 | 2.12E-01 | 1.55E-01 | 1.80E-01 | 1.00E+00 |
| 410.18385 | 64.16  | 13.02 | 17.88 | 11.06 | 11.86 | 1.72E-143 | 5.11E-15 | 5.11E-15 | 4.01E-14 | 5.11E-15 | 5.11E-15 | 1.04E-10 |
| 410.22224 | 174.32 | 17.75 | 18.03 | 18.12 | 17.56 | 1.08E-02  | 3.87E-01 | 1.45E-01 | 7.28E-01 | 9.55E-01 | 6.05E-02 | 1.41E-02 |
| 410.23834 | 165.47 | 19.00 | 18.67 | 19.30 | 19.02 | 4.41E-04  | 9.23E-02 | 1.38E-01 | 9.99E-01 | 1.03E-04 | 9.08E-02 | 2.24E-01 |
| 410.23944 | 227.03 | 17.44 | 15.48 | 16.23 | 16.48 | 7.58E-29  | 5.11E-15 | 6.24E-14 | 3.42E-09 | 5.23E-06 | 2.13E-09 | 3.31E-01 |
| 410.79    | 71.1   | 16.61 | 15.08 | 16.16 | 16.78 | 1.89E-38  | 5.11E-15 | 2.35E-04 | 4.02E-01 | 4.35E-14 | 5.11E-15 | 6.21E-07 |
| 410.79712 | 63.59  | 15.00 | 14.49 | 15.01 | 14.53 | 1.34E-03  | 1.45E-02 | 1.00E+00 | 3.37E-02 | 1.49E-02 | 9.97E-01 | 3.37E-02 |
| 410.85453 | 66.67  | 15.05 | 12.11 | 14.29 | 14.47 | 2.74E-24  | 1.15E-14 | 1.40E-02 | 1.17E-01 | 6.46E-14 | 4.24E-14 | 9.03E-01 |
| 410.87113 | 144.46 | 15.15 | 14.76 | 14.72 | 14.67 | 3.14E-01  | 5.08E-01 | 4.21E-01 | 3.56E-01 | 9.99E-01 | 9.92E-01 | 9.98E-01 |
| 410.89208 | 43.04  | 18.41 | 19.57 | 19.05 | 19.09 | 1.16E-07  | 1.61E-08 | 3.82E-03 | 2.80E-03 | 3.36E-02 | 7.18E-02 | 9.97E-01 |
| 411.04113 | 65.77  | 8.45  | 17.59 | 7.75  | 8.37  | 3.83E-116 | 5.11E-15 | 1.21E-02 | 9.85E-01 | 5.11E-15 | 5.11E-15 | 5.10E-02 |
| 411.1317  | 23.4   | 16.12 | 16.27 | 16.46 | 16.21 | 4.07E-01  | 8.66E-01 | 3.34E-01 | 9.68E-01 | 8.17E-01 | 9.91E-01 | 6.60E-01 |
| 411.19507 | 231.56 | 19.60 | 19.79 | 20.63 | 20.41 | 1.91E-33  | 7.59E-02 | 5.11E-15 | 4.13E-14 | 3.73E-14 | 8.76E-12 | 3.80E-02 |
| 411.20893 | 34.08  | 13.96 | 14.98 | 12.46 | 12.85 | 2.70E-47  | 1.32E-11 | 2.69E-14 | 1.18E-12 | 5.11E-15 | 5.11E-15 | 3.54E-02 |
| 411.216   | 95.92  | 16.35 | 13.79 | 16.21 | 16.68 | 4.23E-19  | 4.95E-14 | 9.63E-01 | 7.06E-01 | 4.99E-13 | 4.29E-14 | 4.34E-01 |
| 411.22569 | 180.46 | 15.38 | 15.51 | 15.59 | 14.94 | 2.78E-02  | 9.40E-01 | 7.74E-01 | 1.91E-01 | 9.83E-01 | 6.45E-02 | 2.33E-02 |



|           |        |       |       |       |       |          |          |          |          |          |          |          |
|-----------|--------|-------|-------|-------|-------|----------|----------|----------|----------|----------|----------|----------|
| 411.24164 | 162.28 | 17.55 | 16.93 | 17.45 | 17.52 | 3.70E-06 | 9.65E-06 | 8.51E-01 | 9.96E-01 | 4.16E-04 | 7.59E-05 | 9.46E-01 |
| 411.25252 | 244.09 | 18.41 | 17.32 | 17.70 | 17.58 | 2.40E-17 | 4.19E-14 | 1.59E-08 | 1.57E-10 | 6.84E-03 | 1.39E-01 | 7.41E-01 |
| 411.27582 | 227.33 | 19.42 | 18.50 | 18.49 | 18.39 | 5.42E-06 | 2.18E-04 | 1.43E-04 | 4.55E-05 | 1.00E+00 | 9.66E-01 | 9.76E-01 |
| 411.75093 | 290.57 | 14.30 | 17.07 | 16.71 | 15.84 | 2.43E-29 | 5.33E-15 | 2.40E-14 | 3.62E-10 | 3.81E-01 | 1.60E-06 | 1.09E-03 |
| 411.93187 | 36.07  | 18.47 | 18.92 | 19.35 | 18.45 | 5.89E-05 | 1.54E-01 | 2.09E-04 | 9.99E-01 | 1.80E-01 | 1.49E-01 | 3.09E-04 |
| 411.95058 | 22.17  | 14.12 | 18.27 | 18.17 | 17.99 | 4.28E-54 | 5.11E-15 | 5.11E-15 | 5.11E-15 | 9.74E-01 | 6.49E-01 | 8.72E-01 |
| 411.98361 | 26.18  | 13.59 | 14.46 | 15.04 | 13.74 | 4.74E-04 | 9.19E-02 | 6.73E-04 | 9.79E-01 | 4.31E-01 | 2.58E-01 | 5.58E-03 |
| 412.01979 | 30.32  | 15.87 | 15.65 | 15.97 | 15.55 | 2.39E-01 | 7.39E-01 | 9.73E-01 | 4.76E-01 | 4.90E-01 | 9.72E-01 | 2.66E-01 |
| 412.03246 | 23.62  | 15.01 | 15.42 | 15.60 | 15.89 | 6.51E-03 | 3.51E-01 | 7.70E-02 | 3.40E-03 | 8.86E-01 | 2.69E-01 | 6.76E-01 |
| 412.12421 | 23.61  | 15.53 | 15.00 | 15.58 | 15.28 | 1.77E-01 | 2.52E-01 | 9.97E-01 | 8.29E-01 | 1.88E-01 | 7.91E-01 | 7.35E-01 |
| 412.19853 | 226.82 | 17.19 | 17.47 | 18.48 | 18.17 | 2.74E-33 | 2.21E-02 | 5.11E-15 | 4.09E-14 | 4.00E-14 | 2.50E-10 | 1.35E-02 |
| 412.21942 | 178.64 | 16.05 | 16.21 | 16.23 | 15.87 | 1.66E-01 | 7.78E-01 | 7.20E-01 | 7.26E-01 | 1.00E+00 | 2.26E-01 | 1.86E-01 |
| 412.23361 | 158.27 | 13.80 | 12.15 | 13.40 | 13.53 | 7.37E-10 | 7.83E-10 | 3.65E-01 | 7.14E-01 | 5.97E-06 | 1.22E-06 | 9.59E-01 |
| 412.25343 | 171.7  | 16.40 | 15.50 | 16.10 | 15.77 | 2.81E-08 | 1.88E-08 | 1.72E-01 | 2.63E-04 | 3.97E-04 | 2.73E-01 | 1.44E-01 |
| 412.2793  | 222.75 | 17.14 | 16.11 | 15.95 | 16.07 | 1.24E-06 | 1.19E-04 | 5.58E-06 | 1.03E-04 | 9.22E-01 | 9.99E-01 | 9.65E-01 |
| 412.30753 | 182.28 | 10.60 | 13.77 | 12.56 | 11.98 | 2.95E-09 | 4.90E-10 | 1.66E-04 | 2.11E-02 | 5.63E-02 | 1.84E-03 | 6.26E-01 |
| 412.80993 | 66.12  | 16.23 | 14.20 | 14.81 | 14.74 | 6.92E-20 | 4.15E-14 | 3.93E-11 | 2.37E-11 | 1.41E-02 | 4.71E-02 | 9.88E-01 |
| 412.82283 | 42.47  | 15.97 | 15.76 | 16.57 | 15.48 | 3.63E-04 | 8.43E-01 | 6.59E-02 | 2.21E-01 | 8.12E-03 | 6.95E-01 | 1.94E-04 |
| 412.84184 | 31.64  | 13.18 | 13.48 | 14.88 | 14.65 | 1.67E-03 | 9.36E-01 | 4.72E-03 | 2.74E-02 | 3.65E-02 | 1.32E-01 | 9.71E-01 |
| 412.88472 | 27.05  | 16.10 | 17.22 | 17.22 | 17.06 | 2.45E-07 | 3.98E-06 | 3.40E-06 | 1.65E-04 | 1.00E+00 | 9.00E-01 | 9.03E-01 |
| 412.94578 | 36.16  | 14.67 | 15.38 | 14.80 | 15.29 | 1.21E-02 | 2.62E-02 | 9.59E-01 | 8.10E-02 | 1.05E-01 | 9.85E-01 | 2.42E-01 |
| 412.9674  | 38.53  | 16.81 | 17.36 | 17.44 | 17.37 | 2.51E-03 | 1.79E-02 | 4.28E-03 | 1.86E-02 | 9.77E-01 | 1.00E+00 | 9.87E-01 |
| 413.00198 | 27.66  | 13.21 | 15.25 | 14.11 | 14.93 | 1.25E-06 | 1.88E-06 | 9.16E-02 | 1.24E-04 | 2.15E-02 | 8.66E-01 | 1.75E-01 |
| 413.07239 | 37.05  | 14.59 | 17.28 | 15.10 | 14.62 | 2.22E-15 | 1.49E-13 | 3.96E-01 | 1.00E+00 | 2.69E-09 | 2.58E-12 | 4.96E-01 |
| 413.1933  | 210.36 | 14.09 | 13.52 | 15.80 | 15.86 | 1.68E-17 | 1.81E-01 | 2.57E-08 | 2.57E-08 | 7.19E-13 | 9.87E-13 | 9.97E-01 |
| 413.21026 | 239.38 | 17.20 | 18.13 | 18.88 | 17.98 | 6.45E-10 | 6.08E-04 | 5.49E-11 | 7.93E-03 | 1.08E-02 | 9.29E-01 | 1.77E-03 |
| 413.22931 | 185.19 | 15.91 | 13.91 | 14.83 | 15.34 | 1.48E-07 | 4.20E-08 | 6.97E-03 | 3.47E-01 | 3.36E-02 | 3.42E-04 | 4.63E-01 |
| 413.24744 | 236.82 | 19.98 | 20.46 | 20.52 | 20.42 | 1.75E-01 | 2.92E-01 | 1.86E-01 | 3.91E-01 | 9.96E-01 | 9.99E-01 | 9.85E-01 |
| 413.2916  | 234.85 | 23.47 | 23.07 | 22.83 | 22.70 | 8.59E-03 | 3.18E-01 | 3.18E-02 | 8.71E-03 | 7.52E-01 | 4.52E-01 | 9.54E-01 |
| 413.87846 | 31.44  | 16.62 | 16.22 | 16.78 | 16.49 | 5.30E-02 | 2.02E-01 | 8.39E-01 | 9.30E-01 | 3.34E-02 | 5.76E-01 | 5.12E-01 |
| 413.92847 | 36.15  | 14.56 | 14.41 | 13.74 | 13.87 | 2.77E-02 | 9.63E-01 | 4.50E-02 | 1.43E-01 | 1.62E-01 | 3.65E-01 | 9.80E-01 |
| 413.94181 | 34.94  | 13.68 | 12.87 | 13.76 | 13.18 | 7.87E-03 | 2.71E-02 | 9.92E-01 | 3.19E-01 | 1.43E-02 | 7.48E-01 | 2.11E-01 |
| 413.96274 | 34.22  | 13.08 | 14.72 | 14.55 | 14.42 | 9.40E-06 | 2.83E-05 | 1.89E-04 | 1.43E-03 | 9.64E-01 | 8.42E-01 | 9.83E-01 |
| 414.04415 | 22.18  | 17.57 | 19.21 | 19.15 | 18.82 | 2.70E-25 | 3.02E-14 | 3.71E-14 | 2.63E-13 | 9.85E-01 | 7.15E-02 | 1.49E-01 |
| 414.07122 | 26.46  | 18.06 | 16.73 | 17.46 | 17.33 | 3.32E-10 | 2.79E-11 | 5.52E-03 | 6.88E-04 | 6.39E-04 | 1.07E-02 | 9.03E-01 |
| 414.14869 | 26.63  | 13.79 | 15.97 | 16.02 | 14.45 | 2.40E-36 | 5.11E-15 | 5.11E-15 | 9.86E-04 | 9.89E-01 | 5.77E-14 | 4.42E-14 |
| 414.21406 | 244.32 | 14.12 | 15.00 | 15.91 | 14.17 | 9.52E-08 | 3.33E-02 | 4.03E-07 | 9.99E-01 | 3.35E-02 | 7.10E-02 | 3.57E-06 |
| 414.25096 | 237.21 | 17.34 | 17.93 | 17.95 | 17.97 | 1.58E-01 | 2.80E-01 | 2.33E-01 | 2.35E-01 | 1.00E+00 | 9.99E-01 | 1.00E+00 |
| 414.26889 | 172.64 | 16.11 | 15.59 | 15.95 | 15.44 | 7.45E-04 | 1.78E-02 | 8.00E-01 | 1.38E-03 | 1.84E-01 | 8.44E-01 | 2.84E-02 |
| 414.28647 | 182.97 | 12.93 | 12.82 | 14.16 | 13.67 | 1.69E-04 | 9.88E-01 | 1.26E-03 | 1.27E-01 | 5.69E-04 | 7.13E-02 | 5.00E-01 |
| 414.29509 | 239.27 | 21.48 | 20.91 | 20.67 | 20.59 | 2.24E-04 | 4.28E-02 | 1.18E-03 | 4.48E-04 | 7.09E-01 | 4.96E-01 | 9.82E-01 |
| 414.76662 | 90.04  | 16.33 | 17.73 | 17.80 | 17.27 | 7.05E-26 | 3.57E-14 | 1.87E-14 | 1.73E-10 | 9.51E-01 | 5.96E-03 | 8.54E-04 |
| 414.82169 | 72.69  | 14.27 | 14.15 | 14.11 | 13.81 | 7.63E-01 | 9.92E-01 | 9.81E-01 | 7.14E-01 | 1.00E+00 | 8.70E-01 | 9.05E-01 |
| 414.86081 | 49.9   | 11.57 | 15.24 | 14.46 | 14.45 | 1.60E-11 | 5.02E-11 | 1.89E-07 | 5.69E-07 | 4.36E-01 | 4.54E-01 | 1.00E+00 |
| 414.88149 | 39.43  | 12.42 | 13.00 | 14.32 | 13.01 | 3.16E-03 | 6.69E-01 | 1.37E-03 | 6.73E-01 | 6.07E-02 | 1.00E+00 | 7.47E-02 |

|           |        |       |       |       |       |           |          |          |          |          |          |          |
|-----------|--------|-------|-------|-------|-------|-----------|----------|----------|----------|----------|----------|----------|
| 414.9033  | 44.6   | 17.93 | 19.20 | 19.18 | 19.13 | 1.56E-35  | 5.11E-15 | 5.11E-15 | 7.11E-15 | 9.99E-01 | 9.20E-01 | 9.54E-01 |
| 414.92566 | 40.17  | 19.64 | 20.83 | 20.86 | 20.88 | 1.62E-26  | 4.05E-14 | 3.57E-14 | 4.02E-14 | 9.94E-01 | 9.83E-01 | 9.99E-01 |
| 415.02998 | 63.21  | 12.33 | 23.36 | 11.14 | 10.45 | 4.77E-101 | 5.11E-15 | 4.06E-03 | 2.57E-06 | 5.11E-15 | 5.11E-15 | 2.45E-01 |
| 415.04148 | 19.68  | 16.07 | 16.65 | 16.55 | 16.85 | 2.16E-02  | 1.06E-01 | 2.19E-01 | 1.55E-02 | 9.83E-01 | 8.72E-01 | 6.76E-01 |
| 415.22522 | 174.32 | 16.45 | 15.32 | 15.55 | 15.94 | 1.35E-04  | 1.10E-04 | 3.23E-03 | 2.18E-01 | 8.06E-01 | 1.09E-01 | 4.93E-01 |
| 415.22638 | 259.37 | 11.41 | 13.80 | 15.50 | 14.85 | 8.76E-12  | 1.46E-04 | 1.45E-11 | 4.16E-08 | 1.63E-02 | 2.86E-01 | 6.77E-01 |
| 415.24551 | 217.45 | 18.20 | 18.73 | 18.79 | 19.22 | 1.98E-03  | 1.58E-01 | 8.99E-02 | 6.68E-04 | 9.96E-01 | 2.61E-01 | 3.67E-01 |
| 415.26294 | 242.77 | 14.63 | 17.00 | 16.38 | 16.60 | 5.20E-06  | 6.75E-06 | 1.41E-03 | 4.07E-04 | 5.70E-01 | 8.52E-01 | 9.70E-01 |
| 415.30723 | 257.97 | 24.43 | 23.91 | 23.63 | 23.59 | 6.40E-03  | 2.01E-01 | 1.25E-02 | 1.18E-02 | 7.19E-01 | 6.66E-01 | 9.99E-01 |
| 415.31933 | 202.92 | 14.58 | 15.47 | 14.44 | 16.13 | 6.73E-04  | 1.82E-01 | 9.87E-01 | 3.72E-03 | 9.99E-02 | 4.77E-01 | 1.55E-03 |
| 415.87518 | 39.01  | 12.85 | 14.37 | 14.09 | 13.65 | 1.54E-03  | 1.27E-03 | 1.18E-02 | 2.14E-01 | 9.08E-01 | 3.43E-01 | 7.33E-01 |
| 415.8848  | 37.72  | 16.13 | 15.36 | 15.85 | 14.73 | 3.90E-04  | 9.06E-02 | 8.11E-01 | 2.60E-04 | 4.77E-01 | 2.64E-01 | 7.36E-03 |
| 415.92908 | 45.24  | 15.03 | 16.47 | 16.45 | 16.61 | 5.53E-19  | 1.30E-13 | 1.33E-13 | 4.37E-14 | 1.00E+00 | 8.60E-01 | 8.19E-01 |
| 416.01134 | 30.08  | 13.02 | 14.32 | 15.13 | 13.73 | 1.29E-19  | 5.79E-09 | 4.02E-14 | 4.71E-03 | 8.86E-04 | 3.07E-02 | 2.41E-09 |
| 416.03356 | 63.15  | 12.84 | 20.28 | 10.89 | 11.36 | 7.69E-117 | 5.11E-15 | 4.31E-14 | 4.32E-10 | 5.11E-15 | 5.11E-15 | 1.42E-01 |
| 416.28282 | 205.06 | 17.84 | 17.56 | 17.89 | 17.32 | 5.45E-03  | 3.53E-01 | 9.90E-01 | 1.75E-02 | 2.26E-01 | 5.50E-01 | 8.59E-03 |
| 416.31053 | 257.31 | 22.46 | 21.78 | 21.51 | 21.51 | 3.83E-04  | 3.67E-02 | 9.14E-04 | 1.48E-03 | 7.03E-01 | 7.23E-01 | 1.00E+00 |
| 416.7581  | 98.9   | 15.15 | 14.17 | 14.65 | 14.87 | 1.30E-10  | 2.59E-11 | 1.06E-03 | 1.64E-01 | 3.22E-03 | 9.58E-06 | 4.01E-01 |
| 416.84194 | 149.96 | 15.10 | 13.59 | 12.75 | 14.76 | 7.86E-14  | 5.99E-06 | 8.05E-13 | 6.74E-01 | 3.30E-02 | 1.69E-03 | 6.04E-09 |
| 416.86313 | 49.93  | 20.09 | 18.78 | 20.17 | 20.14 | 1.25E-47  | 5.11E-15 | 7.46E-01 | 9.23E-01 | 5.11E-15 | 5.11E-15 | 9.87E-01 |
| 416.88407 | 41.63  | 21.53 | 23.34 | 23.46 | 23.30 | 1.60E-43  | 5.11E-15 | 5.11E-15 | 5.11E-15 | 8.08E-01 | 9.86E-01 | 6.17E-01 |
| 416.89675 | 31.13  | 14.38 | 13.80 | 14.98 | 13.53 | 5.58E-05  | 2.45E-01 | 2.05E-01 | 4.22E-02 | 1.34E-03 | 8.49E-01 | 7.55E-05 |
| 416.92185 | 45.26  | 16.84 | 16.33 | 16.36 | 16.70 | 3.12E-03  | 8.65E-03 | 1.48E-02 | 8.15E-01 | 9.97E-01 | 1.34E-01 | 1.91E-01 |
| 417.01237 | 33.79  | 14.52 | 15.24 | 15.34 | 15.15 | 7.50E-04  | 5.98E-03 | 9.64E-04 | 2.48E-02 | 9.65E-01 | 9.83E-01 | 8.39E-01 |
| 417.02832 | 63.11  | 14.22 | 20.27 | 12.45 | 12.97 | 8.26E-151 | 5.11E-15 | 5.11E-15 | 3.87E-14 | 5.11E-15 | 5.11E-15 | 2.51E-04 |
| 417.04862 | 45.72  | 13.96 | 13.61 | 14.31 | 12.98 | 4.42E-03  | 7.64E-01 | 7.45E-01 | 4.02E-02 | 2.17E-01 | 3.39E-01 | 2.41E-03 |
| 417.20576 | 92.68  | 13.11 | 9.41  | 13.34 | 14.41 | 3.41E-13  | 2.46E-08 | 9.79E-01 | 1.56E-01 | 5.88E-09 | 1.12E-12 | 3.34E-01 |
| 417.21043 | 180.73 | 16.85 | 17.54 | 17.04 | 17.67 | 1.82E-05  | 1.11E-03 | 7.14E-01 | 9.64E-05 | 3.88E-02 | 9.00E-01 | 5.81E-03 |
| 417.24192 | 182.74 | 17.42 | 15.76 | 16.05 | 16.19 | 3.69E-23  | 2.91E-14 | 4.33E-14 | 9.23E-13 | 2.34E-01 | 3.77E-02 | 8.19E-01 |
| 417.26519 | 229.23 | 16.80 | 16.48 | 17.29 | 17.17 | 2.74E-05  | 2.47E-01 | 2.38E-02 | 1.59E-01 | 4.15E-05 | 1.07E-03 | 9.12E-01 |
| 417.28647 | 192.16 | 18.87 | 17.18 | 17.55 | 17.60 | 8.16E-23  | 2.86E-14 | 4.92E-14 | 3.74E-13 | 9.30E-02 | 5.56E-02 | 9.92E-01 |
| 417.31384 | 252.23 | 19.27 | 18.45 | 18.02 | 18.20 | 2.76E-05  | 1.36E-02 | 2.71E-05 | 8.11E-04 | 3.96E-01 | 8.17E-01 | 9.15E-01 |
| 417.32257 | 277.37 | 23.48 | 23.31 | 23.44 | 23.13 | 2.24E-02  | 4.64E-01 | 9.82E-01 | 1.97E-02 | 7.09E-01 | 4.61E-01 | 5.99E-02 |
| 417.86643 | 64.77  | 14.86 | 12.79 | 14.18 | 14.02 | 4.26E-11  | 4.64E-12 | 5.57E-02 | 1.53E-02 | 7.26E-06 | 1.56E-04 | 9.49E-01 |
| 417.87712 | 32.62  | 15.69 | 14.27 | 14.83 | 14.30 | 5.45E-03  | 8.65E-03 | 2.08E-01 | 1.35E-02 | 6.07E-01 | 1.00E+00 | 6.64E-01 |
| 417.88738 | 48.06  | 17.14 | 19.22 | 19.39 | 19.21 | 9.60E-43  | 5.11E-15 | 5.11E-15 | 5.11E-15 | 6.80E-01 | 1.00E+00 | 6.46E-01 |
| 417.89793 | 32.28  | 16.53 | 17.33 | 17.51 | 16.95 | 1.25E-05  | 6.41E-04 | 1.36E-05 | 1.92E-01 | 8.27E-01 | 2.82E-01 | 4.39E-02 |
| 417.91569 | 38.13  | 13.81 | 13.34 | 13.62 | 13.41 | 4.74E-01  | 4.71E-01 | 9.38E-01 | 6.26E-01 | 8.28E-01 | 9.97E-01 | 9.23E-01 |
| 417.93935 | 19.71  | 14.27 | 18.01 | 17.99 | 17.57 | 2.23E-30  | 7.99E-15 | 7.77E-15 | 4.19E-14 | 1.00E+00 | 5.39E-01 | 5.74E-01 |
| 417.96874 | 39.49  | 15.67 | 18.54 | 18.90 | 17.44 | 4.64E-29  | 2.60E-14 | 5.33E-15 | 1.26E-09 | 5.35E-01 | 4.78E-04 | 1.26E-06 |
| 418.00187 | 25.72  | 20.20 | 19.51 | 19.62 | 19.46 | 5.31E-08  | 1.99E-06 | 7.06E-05 | 6.77E-07 | 8.50E-01 | 9.86E-01 | 6.67E-01 |
| 418.01189 | 35.11  | 15.08 | 14.98 | 15.46 | 15.19 | 4.40E-01  | 9.88E-01 | 5.78E-01 | 9.85E-01 | 4.02E-01 | 9.13E-01 | 8.24E-01 |
| 418.02975 | 39.28  | 11.55 | 16.54 | 14.22 | 12.19 | 2.77E-28  | 5.33E-15 | 7.69E-10 | 4.07E-01 | 2.06E-07 | 4.12E-14 | 1.27E-05 |
| 418.0456  | 46.38  | 14.34 | 15.89 | 16.17 | 14.37 | 8.63E-17  | 3.70E-09 | 2.08E-12 | 9.99E-01 | 6.41E-01 | 4.46E-08 | 5.15E-11 |
| 418.21408 | 182.28 | 14.20 | 14.97 | 13.95 | 15.24 | 1.05E-04  | 5.80E-02 | 8.47E-01 | 5.64E-03 | 6.73E-03 | 8.37E-01 | 4.33E-04 |

|           |        |       |       |       |       |           |          |          |          |          |          |          |
|-----------|--------|-------|-------|-------|-------|-----------|----------|----------|----------|----------|----------|----------|
| 418.24508 | 183.9  | 15.26 | 12.04 | 12.23 | 12.79 | 1.95E-30  | 5.77E-15 | 9.33E-15 | 4.13E-14 | 8.87E-01 | 3.41E-02 | 1.74E-01 |
| 418.25689 | 74.92  | 14.27 | 18.01 | 12.67 | 13.19 | 4.46E-138 | 5.11E-15 | 5.11E-15 | 1.31E-14 | 5.11E-15 | 5.11E-15 | 7.97E-07 |
| 418.28087 | 191.22 | 14.64 | 14.31 | 12.99 | 14.25 | 2.85E-06  | 7.21E-01 | 1.94E-06 | 6.27E-01 | 3.54E-04 | 9.98E-01 | 1.02E-03 |
| 418.29954 | 194.95 | 16.71 | 16.41 | 16.45 | 15.75 | 2.04E-07  | 2.21E-01 | 3.36E-01 | 4.79E-08 | 9.94E-01 | 4.75E-04 | 1.53E-04 |
| 418.30844 | 269.79 | 18.31 | 17.80 | 17.81 | 17.91 | 4.80E-02  | 7.14E-02 | 7.43E-02 | 2.38E-01 | 1.00E+00 | 9.62E-01 | 9.69E-01 |
| 418.31639 | 252.13 | 16.02 | 14.27 | 12.51 | 14.56 | 1.71E-11  | 8.29E-04 | 1.17E-12 | 1.00E-02 | 9.76E-04 | 9.31E-01 | 1.27E-04 |
| 418.32596 | 270.97 | 21.35 | 21.26 | 21.38 | 21.01 | 1.35E-02  | 8.39E-01 | 9.98E-01 | 2.23E-02 | 7.51E-01 | 1.85E-01 | 1.55E-02 |
| 418.75606 | 96.9   | 14.10 | 12.99 | 13.47 | 13.54 | 6.05E-05  | 1.25E-05 | 3.05E-02 | 8.23E-02 | 1.62E-01 | 1.02E-01 | 9.92E-01 |
| 418.77354 | 89.84  | 16.27 | 16.02 | 16.40 | 16.05 | 3.39E-03  | 1.30E-01 | 6.31E-01 | 2.61E-01 | 6.13E-03 | 9.91E-01 | 1.96E-02 |
| 418.80065 | 71.07  | 16.14 | 16.73 | 17.15 | 16.77 | 3.42E-09  | 5.91E-04 | 5.02E-10 | 2.81E-04 | 3.25E-02 | 9.92E-01 | 8.04E-02 |
| 418.82145 | 53.35  | 22.23 | 22.26 | 23.05 | 22.81 | 2.35E-38  | 9.35E-01 | 5.11E-15 | 4.23E-14 | 5.11E-15 | 4.30E-14 | 8.53E-04 |
| 418.84132 | 71.93  | 15.87 | 15.11 | 16.53 | 16.23 | 1.96E-29  | 3.46E-11 | 6.50E-09 | 5.37E-03 | 5.11E-15 | 4.13E-14 | 3.20E-02 |
| 418.85843 | 156.41 | 16.42 | 14.39 | 14.22 | 14.72 | 9.63E-11  | 2.69E-08 | 1.02E-09 | 7.48E-06 | 9.54E-01 | 7.82E-01 | 4.65E-01 |
| 418.88007 | 41.85  | 20.25 | 20.64 | 21.02 | 20.98 | 1.88E-31  | 2.55E-09 | 5.11E-15 | 8.66E-15 | 2.43E-08 | 1.24E-06 | 9.41E-01 |
| 418.97401 | 47.08  | 13.43 | 15.09 | 14.63 | 14.22 | 1.28E-08  | 5.65E-09 | 2.90E-05 | 1.71E-02 | 3.16E-01 | 9.34E-03 | 4.27E-01 |
| 418.986   | 69.35  | 13.85 | 14.60 | 14.98 | 15.52 | 5.61E-09  | 1.41E-02 | 3.68E-05 | 2.07E-09 | 4.28E-01 | 2.96E-03 | 1.68E-01 |
| 419.00442 | 26.85  | 16.35 | 15.36 | 15.22 | 15.32 | 5.83E-11  | 1.47E-07 | 1.29E-09 | 1.04E-07 | 8.56E-01 | 9.97E-01 | 9.42E-01 |
| 419.0232  | 36.11  | 15.91 | 14.83 | 14.21 | 14.64 | 7.21E-04  | 5.34E-02 | 3.78E-04 | 1.85E-02 | 4.76E-01 | 9.72E-01 | 7.70E-01 |
| 419.04497 | 22.36  | 15.26 | 14.76 | 14.38 | 15.13 | 8.16E-02  | 5.16E-01 | 7.49E-02 | 9.87E-01 | 7.44E-01 | 7.63E-01 | 2.03E-01 |
| 419.20589 | 30     | 15.91 | 14.03 | 15.15 | 16.88 | 3.82E-09  | 4.02E-05 | 2.40E-01 | 9.55E-02 | 3.79E-02 | 1.51E-09 | 3.94E-04 |
| 419.20691 | 175.08 | 10.89 | 11.34 | 11.45 | 12.44 | 3.89E-02  | 8.26E-01 | 7.06E-01 | 2.08E-02 | 9.97E-01 | 1.85E-01 | 2.60E-01 |
| 419.25722 | 187.05 | 17.81 | 16.29 | 16.74 | 16.70 | 1.80E-17  | 4.37E-14 | 8.24E-10 | 6.13E-10 | 3.04E-02 | 7.88E-02 | 9.92E-01 |
| 419.28342 | 211.29 | 16.89 | 16.04 | 15.88 | 16.08 | 3.05E-05  | 9.97E-04 | 4.69E-05 | 2.58E-03 | 8.97E-01 | 9.99E-01 | 8.34E-01 |
| 419.3024  | 16.74  | 15.05 | 11.80 | 11.63 | 12.34 | 2.56E-46  | 5.11E-15 | 5.11E-15 | 5.11E-15 | 8.42E-01 | 5.93E-02 | 5.24E-03 |
| 419.30272 | 197.65 | 16.04 | 14.10 | 13.94 | 14.54 | 9.25E-27  | 3.55E-14 | 1.09E-14 | 2.98E-13 | 8.14E-01 | 1.10E-01 | 1.03E-02 |
| 419.32874 | 282    | 17.96 | 17.71 | 17.96 | 17.55 | 2.22E-02  | 3.37E-01 | 1.00E+00 | 3.95E-02 | 3.68E-01 | 7.42E-01 | 4.81E-02 |
| 419.82482 | 53.25  | 17.80 | 16.92 | 18.65 | 18.37 | 5.83E-43  | 4.51E-14 | 5.00E-14 | 5.85E-07 | 5.11E-15 | 5.11E-15 | 3.17E-02 |
| 419.8843  | 49.17  | 15.01 | 14.99 | 15.42 | 15.59 | 5.42E-07  | 9.98E-01 | 3.13E-03 | 2.58E-05 | 2.41E-03 | 2.14E-05 | 5.60E-01 |
| 419.98277 | 62.3   | 14.98 | 14.95 | 16.41 | 16.58 | 8.94E-13  | 9.99E-01 | 2.22E-07 | 2.12E-08 | 2.79E-07 | 2.79E-08 | 9.22E-01 |
| 419.99793 | 26.2   | 16.74 | 15.94 | 15.85 | 16.02 | 1.03E-09  | 2.73E-07 | 8.22E-09 | 9.58E-06 | 9.35E-01 | 9.40E-01 | 6.55E-01 |
| 420.04835 | 21.72  | 16.16 | 16.41 | 15.59 | 15.34 | 2.40E-03  | 8.34E-01 | 2.15E-01 | 3.99E-02 | 3.64E-02 | 4.41E-03 | 8.60E-01 |
| 420.18821 | 176.7  | 17.81 | 17.92 | 17.95 | 18.16 | 2.70E-01  | 9.09E-01 | 8.48E-01 | 1.94E-01 | 9.99E-01 | 5.62E-01 | 6.38E-01 |
| 420.25106 | 175.14 | 22.01 | 22.34 | 22.34 | 21.46 | 3.93E-06  | 2.27E-01 | 2.16E-01 | 1.29E-02 | 1.00E+00 | 1.78E-05 | 1.43E-05 |
| 420.26029 | 187.27 | 14.60 | 10.09 | 10.93 | 12.46 | 5.28E-21  | 3.97E-14 | 5.88E-14 | 1.78E-05 | 2.31E-01 | 2.89E-06 | 4.76E-03 |
| 420.32382 | 297.09 | 15.06 | 14.45 | 15.19 | 14.83 | 4.74E-02  | 1.15E-01 | 9.61E-01 | 8.36E-01 | 3.98E-02 | 5.57E-01 | 5.72E-01 |
| 420.77189 | 93.08  | 14.74 | 13.28 | 14.37 | 14.22 | 1.04E-17  | 4.27E-14 | 5.96E-02 | 5.02E-03 | 6.43E-11 | 3.91E-08 | 7.99E-01 |
| 420.77985 | 74.17  | 15.91 | 17.24 | 17.71 | 17.11 | 5.98E-23  | 1.19E-13 | 1.89E-14 | 2.83E-11 | 2.19E-02 | 8.84E-01 | 2.58E-03 |
| 420.79948 | 86.91  | 15.00 | 15.24 | 15.85 | 15.38 | 1.47E-06  | 3.92E-01 | 3.65E-07 | 7.97E-02 | 7.46E-04 | 8.36E-01 | 1.81E-02 |
| 420.81962 | 61.22  | 20.35 | 20.30 | 21.13 | 20.88 | 9.39E-40  | 7.86E-01 | 5.11E-15 | 4.45E-14 | 5.11E-15 | 4.51E-14 | 2.77E-04 |
| 420.83706 | 49.08  | 21.76 | 22.09 | 22.82 | 22.62 | 7.76E-45  | 1.63E-06 | 5.11E-15 | 5.11E-15 | 1.62E-14 | 7.39E-13 | 9.70E-03 |
| 420.87677 | 53.09  | 17.15 | 16.74 | 17.36 | 17.35 | 9.97E-13  | 9.14E-06 | 4.43E-02 | 8.46E-02 | 1.70E-11 | 1.88E-10 | 9.98E-01 |
| 420.89183 | 33.23  | 14.75 | 14.83 | 15.33 | 15.45 | 1.86E-02  | 9.89E-01 | 1.11E-01 | 4.39E-02 | 2.40E-01 | 1.10E-01 | 9.70E-01 |
| 420.93154 | 26.65  | 13.00 | 12.37 | 13.66 | 13.71 | 1.22E-01  | 7.34E-01 | 6.89E-01 | 6.68E-01 | 1.64E-01 | 1.64E-01 | 1.00E+00 |
| 420.97528 | 67.93  | 13.18 | 16.39 | 10.90 | 11.59 | 5.21E-89  | 5.11E-15 | 5.11E-15 | 4.24E-14 | 5.11E-15 | 5.11E-15 | 5.12E-04 |
| 421.00186 | 28.14  | 17.58 | 21.06 | 20.63 | 19.86 | 5.26E-33  | 5.11E-15 | 7.11E-15 | 4.66E-14 | 3.37E-01 | 6.86E-05 | 2.21E-02 |

|           |        |       |       |       |       |           |          |          |          |          |          |          |
|-----------|--------|-------|-------|-------|-------|-----------|----------|----------|----------|----------|----------|----------|
| 421.04027 | 18.42  | 13.70 | 17.03 | 17.25 | 17.04 | 2.59E-27  | 4.06E-14 | 2.04E-14 | 4.30E-14 | 9.07E-01 | 1.00E+00 | 9.20E-01 |
| 421.07674 | 19.15  | 14.03 | 16.95 | 15.23 | 14.78 | 2.73E-08  | 6.39E-09 | 4.28E-02 | 3.82E-01 | 1.68E-03 | 6.82E-05 | 7.83E-01 |
| 421.10055 | 62.49  | 15.18 | 18.36 | 14.06 | 14.38 | 1.34E-127 | 5.11E-15 | 5.11E-15 | 4.40E-14 | 5.11E-15 | 5.11E-15 | 1.65E-03 |
| 421.15572 | 178.22 | 14.00 | 13.28 | 13.75 | 14.14 | 3.37E-06  | 7.04E-05 | 3.89E-01 | 8.28E-01 | 2.44E-02 | 4.82E-06 | 9.24E-02 |
| 421.19096 | 142.53 | 15.13 | 14.04 | 14.45 | 15.43 | 6.33E-11  | 4.12E-07 | 3.02E-03 | 4.39E-01 | 1.68E-01 | 7.66E-10 | 1.76E-05 |
| 421.22644 | 168.32 | 19.18 | 17.17 | 17.42 | 18.51 | 9.66E-24  | 3.91E-14 | 4.30E-14 | 4.06E-03 | 5.72E-01 | 9.77E-10 | 5.94E-07 |
| 421.25717 | 202.92 | 20.59 | 20.89 | 21.16 | 20.34 | 9.88E-04  | 4.41E-01 | 2.47E-02 | 6.21E-01 | 5.65E-01 | 4.91E-02 | 7.80E-04 |
| 421.27296 | 181.63 | 15.71 | 16.10 | 15.82 | 15.74 | 4.21E-01  | 4.10E-01 | 9.70E-01 | 1.00E+00 | 6.99E-01 | 5.16E-01 | 9.88E-01 |
| 421.82284 | 61.85  | 15.38 | 13.21 | 16.15 | 15.88 | 2.07E-36  | 2.62E-14 | 5.60E-04 | 6.42E-02 | 5.11E-15 | 5.11E-15 | 5.53E-01 |
| 421.84044 | 56.34  | 17.30 | 17.28 | 18.41 | 18.16 | 2.38E-44  | 9.97E-01 | 5.11E-15 | 2.15E-14 | 5.11E-15 | 2.55E-14 | 8.86E-03 |
| 421.8849  | 26.54  | 14.17 | 15.41 | 14.95 | 16.13 | 1.92E-10  | 3.10E-05 | 1.72E-02 | 4.80E-11 | 3.31E-01 | 4.81E-02 | 1.66E-04 |
| 421.99857 | 42.29  | 15.94 | 16.57 | 17.21 | 16.94 | 2.22E-08  | 1.32E-02 | 1.54E-08 | 2.21E-05 | 1.43E-02 | 3.18E-01 | 6.10E-01 |
| 422.0103  | 18.48  | 11.83 | 16.35 | 15.46 | 14.36 | 1.25E-24  | 1.24E-14 | 4.32E-14 | 8.23E-09 | 1.17E-01 | 1.37E-05 | 3.60E-02 |
| 422.06212 | 19.25  | 16.11 | 18.07 | 17.99 | 17.76 | 2.87E-31  | 5.77E-15 | 7.33E-15 | 4.20E-14 | 9.62E-01 | 2.37E-01 | 4.85E-01 |
| 422.07157 | 18.01  | 10.60 | 13.13 | 13.16 | 13.99 | 3.66E-11  | 8.31E-07 | 5.00E-07 | 9.92E-11 | 1.00E+00 | 3.00E-01 | 3.17E-01 |
| 422.23019 | 164.15 | 16.88 | 14.13 | 14.54 | 16.06 | 8.72E-28  | 1.04E-14 | 4.33E-14 | 4.17E-03 | 3.22E-01 | 1.32E-12 | 1.45E-08 |
| 422.26218 | 197.19 | 18.16 | 18.66 | 18.78 | 18.01 | 4.51E-05  | 3.05E-02 | 2.99E-03 | 8.51E-01 | 8.99E-01 | 4.22E-03 | 3.12E-04 |
| 422.77749 | 84.61  | 14.18 | 14.86 | 15.73 | 15.16 | 7.03E-12  | 4.56E-03 | 1.02E-12 | 1.67E-05 | 1.42E-04 | 4.61E-01 | 3.41E-02 |
| 422.79833 | 76.44  | 14.65 | 14.13 | 15.34 | 15.07 | 7.26E-14  | 2.34E-03 | 1.30E-05 | 2.26E-02 | 1.43E-13 | 1.67E-08 | 2.84E-01 |
| 422.80779 | 83.65  | 15.69 | 13.35 | 14.70 | 15.47 | 2.05E-41  | 5.11E-15 | 1.41E-10 | 4.10E-01 | 4.34E-14 | 5.11E-15 | 3.42E-06 |
| 422.81732 | 62.76  | 16.60 | 15.44 | 17.32 | 17.00 | 4.05E-45  | 2.00E-14 | 1.05E-10 | 1.33E-03 | 5.11E-15 | 5.11E-15 | 1.36E-02 |
| 422.83572 | 51.74  | 19.78 | 20.01 | 20.84 | 20.62 | 6.95E-41  | 4.73E-03 | 5.11E-15 | 7.77E-15 | 1.02E-14 | 7.70E-14 | 1.62E-02 |
| 422.84987 | 38.87  | 19.30 | 20.08 | 20.26 | 20.21 | 1.58E-16  | 4.98E-10 | 6.39E-14 | 2.08E-12 | 4.07E-01 | 7.11E-01 | 9.71E-01 |
| 422.86795 | 34.82  | 14.29 | 14.47 | 14.56 | 14.71 | 7.72E-01  | 9.67E-01 | 9.01E-01 | 7.27E-01 | 9.96E-01 | 9.41E-01 | 9.83E-01 |
| 422.89184 | 145.09 | 16.30 | 11.39 | 11.23 | 13.93 | 6.60E-19  | 4.65E-14 | 4.29E-14 | 3.37E-04 | 9.93E-01 | 1.53E-04 | 4.22E-05 |
| 422.89191 | 48.48  | 15.74 | 9.48  | 10.31 | 12.42 | 5.33E-21  | 4.22E-14 | 4.43E-14 | 1.94E-06 | 5.45E-01 | 5.29E-05 | 6.39E-03 |
| 422.91296 | 36.65  | 19.01 | 20.48 | 20.05 | 20.19 | 1.33E-12  | 2.94E-12 | 5.84E-07 | 4.00E-08 | 1.31E-01 | 4.88E-01 | 8.98E-01 |
| 422.9537  | 32.71  | 16.45 | 15.52 | 15.08 | 15.71 | 2.80E-05  | 5.19E-03 | 8.49E-06 | 4.75E-02 | 4.23E-01 | 9.19E-01 | 1.45E-01 |
| 422.97288 | 70.98  | 13.48 | 15.06 | 11.76 | 12.25 | 3.63E-60  | 3.00E-14 | 7.99E-15 | 1.43E-13 | 5.11E-15 | 5.11E-15 | 8.32E-03 |
| 423.22086 | 231.53 | 16.04 | 13.92 | 16.16 | 16.99 | 8.84E-11  | 2.38E-06 | 9.91E-01 | 1.04E-01 | 9.75E-07 | 6.37E-11 | 2.06E-01 |
| 423.27603 | 230.91 | 23.61 | 24.49 | 24.44 | 23.52 | 6.99E-04  | 1.45E-02 | 2.28E-02 | 9.91E-01 | 9.98E-01 | 9.88E-03 | 1.54E-02 |
| 423.75083 | 287.48 | 14.23 | 17.18 | 16.58 | 17.47 | 2.00E-20  | 4.33E-14 | 4.31E-11 | 4.32E-14 | 2.80E-01 | 8.25E-01 | 4.66E-02 |
| 423.83969 | 52.07  | 15.16 | 14.56 | 15.80 | 15.64 | 1.19E-13  | 7.11E-04 | 1.92E-04 | 1.18E-02 | 6.36E-13 | 9.44E-10 | 7.62E-01 |
| 423.91624 | 34.7   | 14.48 | 16.60 | 16.08 | 15.78 | 6.73E-14  | 9.93E-14 | 6.95E-09 | 6.95E-06 | 1.96E-01 | 1.44E-02 | 6.79E-01 |
| 423.93621 | 69.68  | 11.63 | 14.10 | 14.30 | 13.90 | 5.22E-27  | 3.79E-14 | 1.51E-14 | 4.35E-14 | 8.23E-01 | 8.47E-01 | 3.44E-01 |
| 423.9454  | 21.6   | 9.89  | 14.28 | 14.06 | 11.98 | 1.31E-35  | 5.11E-15 | 5.11E-15 | 4.68E-09 | 9.07E-01 | 4.54E-10 | 1.29E-08 |
| 424.24708 | 187.8  | 17.83 | 17.00 | 17.02 | 16.42 | 1.18E-09  | 2.08E-04 | 2.52E-04 | 1.84E-10 | 1.00E+00 | 2.76E-02 | 2.03E-02 |
| 424.27948 | 236.17 | 21.65 | 22.49 | 22.37 | 21.52 | 5.96E-04  | 1.19E-02 | 4.04E-02 | 9.67E-01 | 9.71E-01 | 4.68E-03 | 1.67E-02 |
| 424.34383 | 205.82 | 13.97 | 16.42 | 15.41 | 15.17 | 1.30E-14  | 4.32E-14 | 1.64E-06 | 1.82E-04 | 2.00E-03 | 1.20E-04 | 8.29E-01 |
| 424.75881 | 291.09 | 13.33 | 17.07 | 16.82 | 15.20 | 9.89E-40  | 5.11E-15 | 5.11E-15 | 1.80E-11 | 7.53E-01 | 6.87E-11 | 1.21E-08 |
| 424.76668 | 67.19  | 16.89 | 16.12 | 17.50 | 17.56 | 1.10E-26  | 5.80E-09 | 6.18E-06 | 1.00E-06 | 2.38E-14 | 1.89E-14 | 9.48E-01 |
| 424.77764 | 76.96  | 14.99 | 15.20 | 16.15 | 15.20 | 2.61E-23  | 2.23E-01 | 2.55E-14 | 2.23E-01 | 4.26E-14 | 1.00E+00 | 5.02E-14 |
| 424.78716 | 85.3   | 14.58 | 13.04 | 14.07 | 14.46 | 2.50E-14  | 1.64E-13 | 3.42E-02 | 9.30E-01 | 1.11E-06 | 6.24E-11 | 1.94E-01 |
| 424.83118 | 57.09  | 16.96 | 15.94 | 16.69 | 16.40 | 2.07E-09  | 7.27E-10 | 2.58E-01 | 2.23E-03 | 1.44E-05 | 2.06E-02 | 2.82E-01 |
| 424.84976 | 63.04  | 18.52 | 17.74 | 17.07 | 17.59 | 1.36E-10  | 6.48E-04 | 1.76E-11 | 4.41E-05 | 5.65E-03 | 8.82E-01 | 6.23E-02 |

|           |        |       |       |       |       |          |          |          |          |          |          |          |
|-----------|--------|-------|-------|-------|-------|----------|----------|----------|----------|----------|----------|----------|
| 424.87078 | 56.38  | 16.04 | 15.42 | 16.94 | 16.71 | 3.05E-24 | 3.16E-05 | 5.67E-10 | 1.02E-05 | 2.26E-14 | 4.35E-14 | 3.68E-01 |
| 424.90772 | 43.77  | 15.87 | 15.41 | 15.09 | 15.80 | 1.47E-01 | 6.07E-01 | 1.54E-01 | 9.98E-01 | 8.36E-01 | 7.54E-01 | 2.67E-01 |
| 424.92869 | 37.78  | 17.66 | 20.08 | 19.68 | 19.66 | 2.24E-20 | 4.29E-14 | 1.00E-13 | 6.44E-13 | 3.86E-01 | 3.65E-01 | 1.00E+00 |
| 424.94614 | 31.03  | 12.86 | 13.92 | 14.29 | 12.95 | 2.33E-04 | 2.72E-02 | 9.05E-04 | 9.95E-01 | 7.64E-01 | 7.34E-02 | 4.30E-03 |
| 424.96703 | 18.3   | 12.67 | 14.68 | 14.85 | 15.06 | 5.95E-13 | 1.77E-08 | 6.38E-10 | 6.83E-11 | 9.54E-01 | 6.85E-01 | 9.30E-01 |
| 424.98912 | 58.85  | 15.04 | 14.49 | 16.81 | 16.83 | 1.65E-20 | 1.51E-01 | 3.67E-10 | 8.63E-10 | 4.57E-14 | 5.63E-14 | 1.00E+00 |
| 425.03756 | 70.38  | 15.16 | 16.43 | 14.12 | 14.45 | 1.04E-80 | 5.11E-15 | 5.11E-15 | 4.31E-14 | 5.11E-15 | 5.11E-15 | 2.47E-04 |
| 425.06503 | 20.73  | 14.22 | 14.07 | 14.27 | 15.02 | 2.52E-01 | 9.88E-01 | 1.00E+00 | 3.64E-01 | 9.75E-01 | 2.35E-01 | 4.43E-01 |
| 425.08193 | 19.53  | 19.23 | 20.54 | 20.81 | 21.78 | 5.98E-17 | 4.69E-06 | 1.69E-08 | 4.25E-14 | 7.31E-01 | 4.32E-05 | 2.02E-03 |
| 425.10125 | 22.18  | 15.44 | 18.88 | 17.70 | 17.26 | 2.97E-37 | 5.11E-15 | 3.55E-14 | 1.07E-13 | 9.47E-07 | 5.73E-11 | 2.01E-01 |
| 425.17163 | 90.21  | 15.14 | 13.17 | 15.12 | 15.72 | 1.51E-12 | 1.55E-08 | 1.00E+00 | 2.91E-01 | 4.77E-08 | 4.82E-12 | 2.67E-01 |
| 425.21059 | 232.17 | 17.85 | 17.06 | 18.10 | 17.81 | 6.29E-14 | 3.55E-09 | 1.72E-01 | 9.82E-01 | 9.30E-14 | 1.55E-07 | 9.76E-02 |
| 425.23743 | 251.29 | 15.71 | 15.38 | 16.11 | 15.57 | 4.67E-02 | 5.79E-01 | 3.94E-01 | 9.56E-01 | 2.97E-02 | 8.93E-01 | 1.92E-01 |
| 425.25537 | 185.47 | 17.19 | 17.08 | 16.95 | 17.40 | 8.66E-02 | 9.13E-01 | 4.91E-01 | 6.24E-01 | 8.85E-01 | 2.78E-01 | 5.91E-02 |
| 425.28259 | 231.02 | 18.57 | 19.38 | 19.26 | 18.46 | 1.88E-03 | 2.05E-02 | 6.41E-02 | 9.85E-01 | 9.72E-01 | 1.15E-02 | 3.65E-02 |
| 425.29149 | 242.71 | 20.44 | 21.01 | 21.07 | 20.68 | 2.47E-02 | 6.55E-02 | 3.36E-02 | 7.41E-01 | 9.96E-01 | 5.22E-01 | 3.82E-01 |
| 425.94744 | 35.55  | 15.89 | 15.16 | 15.27 | 15.35 | 1.07E-02 | 1.07E-02 | 4.17E-02 | 1.18E-01 | 9.63E-01 | 8.58E-01 | 9.88E-01 |
| 426.02325 | 21.72  | 20.97 | 24.38 | 23.94 | 23.30 | 3.91E-54 | 5.11E-15 | 5.11E-15 | 5.11E-15 | 5.79E-02 | 5.15E-08 | 2.48E-03 |
| 426.03658 | 23.61  | 16.59 | 15.43 | 15.47 | 15.70 | 6.91E-05 | 2.42E-04 | 3.33E-04 | 1.07E-02 | 9.99E-01 | 7.92E-01 | 8.46E-01 |
| 426.21394 | 227.07 | 14.43 | 13.07 | 14.76 | 14.45 | 1.38E-05 | 5.73E-04 | 7.61E-01 | 1.00E+00 | 1.47E-05 | 1.08E-03 | 8.11E-01 |
| 426.28586 | 223.1  | 15.76 | 15.44 | 15.54 | 15.73 | 6.69E-01 | 6.92E-01 | 8.65E-01 | 9.99E-01 | 9.89E-01 | 7.93E-01 | 9.26E-01 |
| 426.29478 | 243.6  | 18.23 | 18.82 | 18.97 | 18.52 | 1.61E-02 | 7.57E-02 | 1.44E-02 | 6.48E-01 | 9.41E-01 | 6.52E-01 | 3.13E-01 |
| 426.35917 | 203.16 | 13.72 | 15.56 | 15.53 | 15.68 | 1.17E-21 | 4.33E-14 | 4.31E-14 | 4.31E-14 | 9.98E-01 | 9.42E-01 | 8.83E-01 |
| 426.76412 | 60.07  | 14.69 | 13.75 | 15.99 | 15.95 | 4.95E-16 | 3.24E-03 | 1.16E-05 | 4.64E-05 | 1.93E-13 | 1.91E-12 | 9.99E-01 |
| 426.78527 | 59.1   | 18.84 | 17.81 | 19.24 | 19.29 | 3.08E-04 | 2.44E-02 | 6.92E-01 | 6.19E-01 | 8.55E-04 | 7.77E-04 | 9.99E-01 |
| 426.82385 | 75.64  | 12.85 | 13.62 | 14.31 | 14.75 | 1.80E-06 | 1.28E-01 | 2.32E-04 | 2.08E-06 | 2.22E-01 | 1.43E-02 | 6.37E-01 |
| 426.84595 | 85.54  | 17.34 | 15.16 | 15.50 | 15.76 | 2.90E-44 | 5.11E-15 | 5.11E-15 | 7.33E-15 | 5.12E-02 | 9.73E-05 | 2.21E-01 |
| 426.86579 | 40.81  | 19.62 | 20.29 | 20.05 | 19.88 | 4.97E-05 | 1.77E-05 | 1.13E-02 | 2.69E-01 | 3.36E-01 | 2.98E-02 | 6.50E-01 |
| 426.87702 | 197.09 | 15.86 | 15.84 | 16.15 | 15.80 | 7.07E-06 | 9.95E-01 | 3.06E-04 | 8.44E-01 | 1.89E-04 | 9.41E-01 | 2.56E-05 |
| 426.92417 | 40.04  | 15.11 | 17.77 | 17.56 | 17.79 | 1.02E-23 | 4.35E-14 | 4.20E-14 | 4.29E-14 | 8.70E-01 | 1.00E+00 | 8.46E-01 |
| 426.9823  | 37.85  | 14.84 | 14.86 | 14.86 | 15.05 | 9.34E-01 | 1.00E+00 | 1.00E+00 | 9.35E-01 | 1.00E+00 | 9.54E-01 | 9.51E-01 |
| 427.03383 | 26.1   | 12.17 | 14.06 | 14.24 | 13.43 | 7.39E-13 | 4.96E-10 | 7.61E-12 | 8.82E-05 | 9.25E-01 | 1.36E-01 | 2.89E-02 |
| 427.05222 | 19.2   | 15.89 | 14.64 | 15.14 | 16.14 | 2.76E-04 | 3.55E-03 | 1.57E-01 | 9.05E-01 | 5.27E-01 | 6.18E-04 | 4.22E-02 |
| 427.07721 | 18.77  | 15.05 | 16.16 | 16.05 | 17.33 | 9.00E-08 | 1.00E-02 | 2.39E-02 | 9.34E-09 | 9.90E-01 | 1.00E-02 | 3.40E-03 |
| 427.08825 | 18.88  | 16.29 | 18.17 | 18.09 | 18.47 | 2.00E-11 | 4.20E-08 | 1.07E-07 | 4.99E-10 | 9.96E-01 | 7.89E-01 | 6.53E-01 |
| 427.18963 | 84.06  | 16.33 | 16.10 | 17.75 | 17.86 | 1.78E-14 | 7.92E-01 | 1.03E-07 | 2.81E-08 | 1.92E-09 | 5.49E-10 | 9.71E-01 |
| 427.20375 | 29.14  | 13.08 | 14.68 | 11.05 | 11.73 | 1.49E-56 | 4.30E-14 | 6.00E-15 | 9.64E-13 | 5.11E-15 | 5.11E-15 | 8.09E-04 |
| 427.22646 | 244.57 | 16.60 | 16.14 | 16.78 | 16.04 | 1.64E-03 | 1.34E-01 | 8.16E-01 | 4.97E-02 | 1.66E-02 | 9.68E-01 | 4.82E-03 |
| 427.23384 | 183.23 | 12.76 | 13.82 | 15.12 | 12.20 | 3.56E-07 | 1.60E-01 | 2.70E-05 | 7.11E-01 | 6.01E-02 | 1.50E-02 | 6.34E-07 |
| 427.25246 | 260.6  | 16.24 | 15.47 | 15.86 | 16.48 | 6.17E-02 | 1.72E-01 | 7.44E-01 | 9.28E-01 | 7.31E-01 | 5.62E-02 | 4.05E-01 |
| 427.30679 | 256.66 | 18.07 | 17.98 | 17.88 | 17.93 | 7.75E-01 | 9.68E-01 | 7.38E-01 | 8.89E-01 | 9.48E-01 | 9.93E-01 | 9.94E-01 |
| 427.32219 | 253.25 | 17.65 | 17.84 | 17.80 | 17.14 | 1.61E-03 | 7.10E-01 | 8.26E-01 | 4.08E-02 | 9.97E-01 | 2.17E-03 | 4.02E-03 |
| 427.86902 | 51.02  | 14.86 | 14.57 | 13.93 | 13.81 | 9.20E-03 | 8.36E-01 | 3.72E-02 | 1.96E-02 | 2.77E-01 | 1.72E-01 | 9.89E-01 |
| 427.90562 | 37.29  | 18.03 | 18.28 | 18.69 | 17.64 | 2.21E-02 | 8.72E-01 | 1.73E-01 | 6.55E-01 | 5.98E-01 | 2.55E-01 | 1.25E-02 |
| 427.92677 | 37.29  | 14.05 | 12.67 | 12.36 | 14.82 | 1.18E-10 | 9.92E-04 | 2.52E-05 | 1.70E-01 | 8.38E-01 | 3.39E-07 | 3.46E-09 |

|           |        |       |       |       |       |           |          |          |          |          |          |          |
|-----------|--------|-------|-------|-------|-------|-----------|----------|----------|----------|----------|----------|----------|
| 427.95685 | 33.75  | 13.02 | 14.03 | 14.64 | 12.89 | 1.19E-10  | 1.13E-03 | 2.34E-08 | 9.61E-01 | 1.14E-01 | 3.84E-04 | 9.98E-09 |
| 428.02758 | 16.73  | 14.85 | 18.61 | 18.22 | 17.49 | 7.42E-48  | 5.11E-15 | 5.11E-15 | 6.22E-15 | 2.72E-01 | 6.22E-06 | 6.13E-03 |
| 428.04698 | 25.87  | 13.33 | 15.33 | 15.50 | 14.26 | 1.33E-08  | 1.24E-06 | 9.74E-08 | 7.65E-02 | 9.71E-01 | 3.43E-02 | 9.01E-03 |
| 428.08961 | 18.17  | 11.56 | 12.87 | 13.07 | 14.39 | 6.23E-07  | 2.83E-02 | 7.09E-03 | 8.49E-08 | 9.75E-01 | 1.25E-02 | 3.77E-02 |
| 428.19346 | 89.65  | 13.12 | 13.14 | 15.19 | 15.13 | 1.12E-12  | 1.00E+00 | 1.99E-08 | 1.40E-07 | 6.65E-08 | 3.95E-07 | 9.99E-01 |
| 428.2653  | 108.69 | 12.73 | 14.68 | 14.56 | 13.73 | 9.14E-10  | 1.09E-08 | 6.06E-08 | 1.00E-02 | 9.83E-01 | 2.20E-02 | 5.49E-02 |
| 428.30236 | 244.8  | 18.13 | 16.86 | 16.45 | 17.31 | 1.99E-32  | 3.69E-14 | 5.11E-15 | 1.32E-09 | 4.71E-03 | 2.21E-03 | 2.79E-10 |
| 428.32561 | 253.53 | 14.95 | 16.56 | 15.71 | 14.03 | 5.44E-10  | 3.34E-05 | 1.18E-01 | 5.18E-02 | 8.16E-02 | 3.01E-10 | 3.53E-05 |
| 428.78498 | 73.04  | 16.85 | 17.06 | 17.12 | 16.94 | 1.44E-01  | 3.54E-01 | 1.33E-01 | 9.08E-01 | 9.59E-01 | 8.00E-01 | 4.99E-01 |
| 428.79496 | 34.4   | 14.45 | 12.84 | 14.62 | 13.64 | 1.34E-04  | 9.25E-04 | 9.77E-01 | 2.36E-01 | 2.68E-04 | 2.75E-01 | 1.16E-01 |
| 428.86128 | 34.94  | 17.22 | 17.81 | 18.22 | 17.30 | 3.07E-10  | 9.16E-04 | 2.21E-09 | 9.54E-01 | 4.74E-02 | 1.05E-02 | 2.20E-07 |
| 428.87424 | 197.08 | 16.79 | 17.24 | 17.47 | 16.71 | 1.65E-17  | 2.26E-06 | 5.48E-13 | 8.26E-01 | 4.77E-02 | 1.37E-07 | 7.90E-14 |
| 428.91882 | 40.46  | 15.49 | 15.02 | 15.26 | 15.44 | 4.26E-02  | 3.97E-02 | 5.54E-01 | 9.94E-01 | 5.34E-01 | 1.03E-01 | 7.50E-01 |
| 428.94125 | 46.48  | 17.70 | 17.67 | 17.77 | 17.87 | 8.23E-01  | 9.99E-01 | 9.89E-01 | 8.71E-01 | 9.68E-01 | 8.11E-01 | 9.70E-01 |
| 428.95869 | 136.59 | 11.61 | 15.62 | 16.00 | 15.15 | 2.30E-23  | 4.37E-14 | 3.93E-14 | 1.29E-13 | 8.10E-01 | 7.16E-01 | 2.17E-01 |
| 429.02366 | 20.57  | 17.12 | 16.72 | 16.70 | 17.84 | 6.60E-03  | 6.55E-01 | 6.12E-01 | 1.70E-01 | 1.00E+00 | 1.17E-02 | 9.09E-03 |
| 429.04586 | 63.95  | 17.91 | 19.44 | 17.44 | 17.50 | 3.93E-98  | 5.11E-15 | 6.67E-14 | 3.77E-11 | 5.11E-15 | 5.11E-15 | 8.12E-01 |
| 429.05918 | 17.77  | 11.73 | 14.39 | 14.45 | 14.14 | 6.10E-11  | 1.16E-08 | 3.61E-09 | 4.97E-07 | 9.99E-01 | 9.48E-01 | 9.00E-01 |
| 429.08512 | 39.66  | 14.74 | 19.05 | 15.01 | 14.76 | 1.46E-39  | 5.11E-15 | 7.89E-01 | 1.00E+00 | 5.11E-15 | 5.11E-15 | 8.49E-01 |
| 429.2052  | 118.09 | 10.33 | 12.93 | 15.21 | 14.62 | 5.57E-15  | 8.45E-05 | 8.10E-14 | 8.80E-11 | 1.10E-03 | 3.48E-02 | 7.77E-01 |
| 429.2862  | 194.51 | 16.54 | 16.13 | 16.36 | 16.49 | 9.46E-02  | 8.20E-02 | 7.17E-01 | 9.93E-01 | 5.53E-01 | 1.89E-01 | 8.82E-01 |
| 429.30182 | 82.48  | 16.54 | 14.15 | 16.57 | 16.91 | 1.49E-21  | 4.24E-14 | 1.00E+00 | 5.29E-01 | 4.29E-14 | 4.29E-14 | 6.08E-01 |
| 429.32252 | 282.3  | 17.43 | 16.53 | 16.91 | 17.08 | 6.68E-03  | 2.75E-03 | 1.78E-01 | 5.53E-01 | 4.45E-01 | 1.66E-01 | 9.20E-01 |
| 429.80673 | 83     | 13.53 | 12.16 | 12.89 | 12.67 | 3.88E-04  | 1.21E-04 | 1.73E-01 | 3.91E-02 | 1.07E-01 | 4.29E-01 | 9.02E-01 |
| 429.85251 | 64.03  | 15.41 | 14.58 | 16.28 | 15.91 | 3.66E-16  | 5.88E-05 | 1.56E-05 | 4.29E-02 | 4.41E-14 | 4.09E-10 | 2.02E-01 |
| 429.90313 | 37.5   | 14.75 | 13.96 | 14.84 | 13.92 | 4.10E-02  | 2.11E-01 | 9.95E-01 | 1.86E-01 | 1.45E-01 | 1.00E+00 | 1.27E-01 |
| 429.93641 | 36.24  | 14.04 | 15.13 | 15.41 | 14.95 | 7.98E-07  | 1.33E-04 | 5.85E-07 | 2.89E-03 | 6.84E-01 | 9.06E-01 | 2.93E-01 |
| 429.96319 | 20.05  | 12.11 | 13.32 | 13.06 | 12.89 | 8.99E-05  | 6.20E-05 | 2.55E-03 | 2.66E-02 | 7.70E-01 | 4.21E-01 | 9.31E-01 |
| 430.03275 | 18.44  | 12.20 | 13.57 | 13.12 | 15.13 | 1.03E-06  | 3.32E-02 | 2.47E-01 | 1.95E-07 | 8.16E-01 | 1.70E-02 | 8.61E-04 |
| 430.04994 | 27.86  | 15.88 | 16.15 | 16.66 | 14.92 | 3.61E-07  | 7.87E-01 | 2.89E-02 | 5.57E-03 | 2.78E-01 | 3.06E-04 | 7.66E-08 |
| 430.09085 | 60.07  | 13.27 | 15.26 | 11.28 | 11.97 | 6.09E-78  | 5.11E-15 | 5.11E-15 | 4.27E-14 | 5.11E-15 | 5.11E-15 | 1.20E-05 |
| 430.22451 | 161.94 | 14.57 | 13.75 | 13.70 | 13.57 | 4.90E-06  | 4.67E-04 | 1.47E-04 | 2.17E-05 | 9.95E-01 | 8.49E-01 | 9.37E-01 |
| 430.24258 | 164.46 | 15.33 | 12.73 | 14.05 | 14.65 | 3.16E-19  | 3.99E-14 | 3.93E-06 | 4.44E-02 | 3.39E-06 | 4.69E-11 | 1.09E-01 |
| 430.28125 | 162.47 | 16.08 | 18.31 | 17.39 | 16.88 | 5.36E-19  | 3.95E-14 | 2.33E-08 | 2.23E-03 | 2.69E-04 | 1.05E-08 | 1.05E-01 |
| 430.29732 | 222.2  | 15.05 | 14.96 | 14.81 | 14.28 | 2.68E-02  | 9.85E-01 | 7.85E-01 | 2.12E-02 | 9.42E-01 | 6.41E-02 | 2.07E-01 |
| 430.31776 | 268.08 | 20.85 | 20.10 | 19.80 | 20.74 | 2.38E-26  | 5.59E-13 | 2.11E-14 | 6.81E-01 | 1.17E-02 | 3.74E-09 | 4.37E-14 |
| 430.74023 | 90.78  | 13.95 | 15.23 | 15.16 | 14.69 | 2.03E-12  | 4.95E-11 | 3.80E-10 | 4.02E-04 | 9.78E-01 | 2.12E-02 | 5.78E-02 |
| 430.79441 | 117.38 | 14.83 | 12.85 | 13.50 | 14.35 | 4.37E-12  | 9.64E-12 | 4.69E-06 | 2.85E-01 | 7.83E-02 | 1.18E-06 | 1.29E-02 |
| 430.80154 | 69.05  | 17.13 | 17.24 | 17.83 | 17.20 | 2.59E-12  | 6.87E-01 | 2.38E-11 | 9.19E-01 | 3.73E-08 | 9.74E-01 | 8.20E-09 |
| 430.82684 | 67.87  | 13.82 | 11.49 | 13.97 | 14.41 | 1.92E-37  | 5.77E-15 | 8.63E-01 | 1.44E-02 | 5.11E-15 | 5.11E-15 | 1.18E-01 |
| 430.83422 | 73     | 14.19 | 14.82 | 14.91 | 15.10 | 6.19E-04  | 2.84E-02 | 7.19E-03 | 6.26E-04 | 9.76E-01 | 6.39E-01 | 8.61E-01 |
| 430.85563 | 38.7   | 13.99 | 14.72 | 15.65 | 13.94 | 2.40E-04  | 3.14E-01 | 5.73E-04 | 1.00E+00 | 1.38E-01 | 3.09E-01 | 8.72E-04 |
| 430.87232 | 194.16 | 16.05 | 15.66 | 16.46 | 15.91 | 6.18E-03  | 2.99E-01 | 2.48E-01 | 9.16E-01 | 2.89E-03 | 7.31E-01 | 8.07E-02 |
| 430.89949 | 47.92  | 20.23 | 21.07 | 21.26 | 21.24 | 1.04E-21  | 5.34E-13 | 4.32E-14 | 4.35E-14 | 2.82E-01 | 4.15E-01 | 9.98E-01 |
| 431.00394 | 64.32  | 14.70 | 23.12 | 13.34 | 13.56 | 1.11E-146 | 5.11E-15 | 4.94E-14 | 2.52E-10 | 5.11E-15 | 5.11E-15 | 5.26E-01 |

|           |        |       |       |       |       |           |          |          |          |          |          |          |
|-----------|--------|-------|-------|-------|-------|-----------|----------|----------|----------|----------|----------|----------|
| 431.02493 | 62.19  | 13.91 | 16.17 | 11.94 | 12.77 | 5.72E-47  | 4.13E-14 | 4.46E-14 | 7.38E-06 | 5.11E-15 | 5.11E-15 | 2.58E-03 |
| 431.03657 | 18.34  | 15.51 | 15.79 | 15.54 | 16.27 | 1.07E-01  | 8.23E-01 | 1.00E+00 | 1.08E-01 | 8.77E-01 | 5.07E-01 | 1.46E-01 |
| 431.09232 | 20.75  | 20.50 | 22.13 | 21.55 | 20.91 | 2.27E-07  | 1.80E-07 | 1.41E-03 | 4.84E-01 | 1.85E-01 | 3.95E-04 | 1.47E-01 |
| 431.17166 | 161.92 | 16.45 | 16.72 | 17.05 | 17.17 | 7.59E-10  | 8.10E-02 | 4.78E-07 | 6.67E-09 | 1.38E-02 | 6.74E-04 | 7.58E-01 |
| 431.18454 | 177.89 | 15.35 | 15.37 | 15.71 | 15.42 | 1.59E-03  | 9.98E-01 | 2.29E-03 | 9.20E-01 | 6.05E-03 | 9.70E-01 | 3.04E-02 |
| 431.22444 | 172.8  | 11.96 | 12.36 | 13.22 | 13.84 | 6.37E-04  | 8.30E-01 | 3.69E-02 | 7.24E-04 | 2.80E-01 | 1.62E-02 | 5.84E-01 |
| 431.24511 | 162.52 | 13.93 | 9.64  | 10.57 | 11.73 | 3.34E-22  | 2.91E-14 | 5.11E-14 | 7.85E-07 | 1.01E-01 | 5.51E-06 | 2.48E-02 |
| 431.26532 | 174.22 | 14.68 | 12.35 | 12.31 | 13.80 | 4.71E-15  | 7.97E-12 | 2.21E-12 | 3.02E-02 | 9.99E-01 | 8.58E-05 | 4.13E-05 |
| 431.28416 | 156.12 | 13.84 | 15.71 | 14.01 | 14.16 | 1.31E-09  | 5.02E-09 | 9.32E-01 | 6.97E-01 | 2.20E-07 | 6.21E-06 | 9.59E-01 |
| 431.30208 | 294.38 | 17.59 | 16.96 | 16.95 | 16.79 | 2.03E-08  | 1.85E-05 | 1.05E-05 | 7.61E-08 | 1.00E+00 | 6.18E-01 | 6.59E-01 |
| 431.32095 | 267.64 | 18.39 | 17.54 | 17.52 | 18.21 | 7.21E-07  | 4.88E-05 | 2.27E-05 | 7.74E-01 | 9.99E-01 | 4.45E-03 | 2.63E-03 |
| 431.90288 | 47.91  | 16.01 | 16.71 | 16.89 | 16.96 | 1.35E-19  | 1.99E-10 | 4.40E-14 | 4.17E-14 | 2.60E-01 | 7.23E-02 | 9.07E-01 |
| 432.00739 | 63.93  | 17.28 | 20.05 | 16.76 | 16.85 | 1.64E-148 | 5.11E-15 | 4.30E-14 | 2.85E-13 | 5.11E-15 | 5.11E-15 | 3.91E-01 |
| 432.09222 | 23.47  | 18.59 | 20.35 | 19.88 | 19.56 | 1.45E-17  | 4.34E-14 | 8.61E-11 | 3.05E-06 | 5.60E-02 | 3.08E-04 | 3.39E-01 |
| 432.11023 | 25.67  | 15.75 | 11.95 | 13.18 | 14.36 | 8.98E-18  | 4.22E-14 | 1.58E-09 | 3.73E-03 | 1.26E-02 | 1.12E-07 | 2.19E-02 |
| 432.17513 | 163.52 | 13.84 | 13.38 | 14.25 | 14.55 | 2.47E-06  | 1.34E-01 | 2.11E-01 | 6.74E-03 | 4.58E-04 | 2.19E-06 | 5.23E-01 |
| 432.18784 | 178.11 | 9.37  | 12.14 | 11.61 | 11.42 | 2.75E-11  | 7.31E-11 | 1.15E-07 | 3.08E-06 | 5.32E-01 | 3.00E-01 | 9.70E-01 |
| 432.22219 | 166.92 | 18.72 | 18.49 | 19.45 | 18.90 | 4.73E-04  | 7.32E-01 | 7.15E-03 | 8.60E-01 | 2.56E-04 | 3.04E-01 | 9.89E-02 |
| 432.27925 | 180.89 | 11.77 | 12.41 | 11.96 | 11.35 | 1.27E-01  | 4.21E-01 | 9.66E-01 | 7.75E-01 | 7.23E-01 | 8.39E-02 | 5.13E-01 |
| 432.29706 | 169.82 | 17.45 | 19.49 | 18.30 | 17.79 | 1.99E-22  | 2.53E-14 | 3.31E-05 | 2.80E-01 | 6.87E-09 | 4.71E-14 | 4.25E-02 |
| 432.30499 | 195.26 | 15.73 | 13.76 | 14.63 | 14.46 | 3.99E-06  | 9.35E-07 | 1.30E-02 | 4.11E-03 | 9.32E-02 | 2.72E-01 | 9.69E-01 |
| 432.33358 | 299.13 | 16.74 | 17.58 | 17.84 | 17.91 | 2.14E-05  | 6.97E-03 | 1.43E-04 | 8.47E-05 | 7.56E-01 | 6.13E-01 | 9.93E-01 |
| 432.73226 | 94.64  | 14.24 | 14.57 | 14.75 | 14.66 | 3.93E-02  | 2.87E-01 | 3.21E-02 | 1.26E-01 | 7.88E-01 | 9.68E-01 | 9.70E-01 |
| 432.79225 | 81.55  | 14.62 | 9.12  | 11.05 | 11.83 | 2.67E-21  | 2.51E-14 | 3.62E-11 | 6.72E-07 | 9.81E-04 | 2.80E-06 | 4.34E-01 |
| 432.81503 | 63.99  | 15.70 | 14.82 | 16.49 | 15.99 | 2.97E-12  | 1.73E-04 | 7.07E-04 | 5.11E-01 | 5.39E-13 | 1.08E-06 | 9.12E-02 |
| 432.81623 | 156.11 | 11.42 | 14.35 | 14.16 | 14.80 | 4.24E-13  | 2.02E-09 | 1.60E-08 | 1.65E-11 | 9.74E-01 | 7.69E-01 | 5.08E-01 |
| 432.83749 | 52.42  | 19.85 | 18.63 | 20.04 | 19.90 | 1.97E-22  | 4.20E-14 | 5.00E-01 | 9.87E-01 | 3.97E-14 | 4.26E-14 | 7.51E-01 |
| 432.85779 | 44.68  | 21.65 | 22.96 | 23.33 | 23.15 | 3.13E-48  | 5.11E-15 | 5.11E-15 | 5.11E-15 | 7.47E-04 | 2.43E-01 | 2.26E-01 |
| 432.86859 | 200.36 | 15.14 | 14.57 | 14.76 | 14.58 | 1.47E-08  | 1.08E-07 | 7.37E-04 | 6.02E-07 | 2.13E-01 | 9.98E-01 | 3.20E-01 |
| 432.86962 | 31.57  | 14.28 | 14.95 | 15.44 | 14.54 | 2.08E-03  | 1.41E-01 | 1.32E-03 | 8.46E-01 | 4.23E-01 | 6.01E-01 | 3.32E-02 |
| 432.89646 | 46.7   | 17.82 | 17.94 | 18.11 | 18.33 | 9.24E-05  | 7.31E-01 | 4.02E-02 | 5.99E-05 | 3.90E-01 | 4.17E-03 | 2.30E-01 |
| 432.98438 | 28.98  | 15.01 | 15.96 | 15.92 | 15.92 | 4.79E-03  | 1.30E-02 | 1.74E-02 | 2.35E-02 | 9.99E-01 | 9.99E-01 | 1.00E+00 |
| 433.00207 | 63.85  | 13.75 | 20.67 | 11.65 | 12.32 | 1.33E-156 | 5.11E-15 | 5.11E-15 | 2.84E-14 | 5.11E-15 | 5.11E-15 | 4.72E-06 |
| 433.02232 | 47.24  | 14.60 | 15.87 | 16.21 | 15.01 | 3.54E-07  | 2.10E-04 | 1.08E-06 | 5.36E-01 | 6.90E-01 | 3.81E-02 | 1.12E-03 |
| 433.09246 | 20.67  | 16.58 | 18.44 | 18.02 | 17.45 | 1.97E-11  | 2.19E-11 | 1.69E-07 | 5.26E-03 | 3.69E-01 | 1.44E-03 | 1.35E-01 |
| 433.11467 | 21.54  | 14.06 | 15.79 | 14.82 | 14.53 | 6.59E-05  | 2.04E-05 | 1.58E-01 | 5.96E-01 | 4.45E-02 | 6.15E-03 | 8.72E-01 |
| 433.22472 | 161.8  | 16.73 | 16.31 | 17.31 | 16.84 | 4.39E-04  | 2.49E-01 | 4.64E-02 | 9.67E-01 | 1.16E-04 | 1.22E-01 | 1.83E-01 |
| 433.23671 | 206.42 | 15.35 | 14.73 | 14.52 | 14.17 | 1.03E-04  | 7.23E-02 | 5.95E-03 | 4.68E-05 | 8.45E-01 | 1.45E-01 | 5.30E-01 |
| 433.30025 | 171.53 | 14.94 | 17.26 | 15.77 | 15.23 | 2.25E-14  | 8.48E-14 | 1.55E-02 | 7.41E-01 | 1.81E-06 | 2.48E-10 | 2.52E-01 |
| 433.33479 | 277.86 | 16.09 | 17.18 | 16.09 | 17.17 | 1.44E-04  | 4.24E-03 | 1.00E+00 | 6.40E-03 | 5.59E-03 | 1.00E+00 | 8.21E-03 |
| 433.84035 | 58.94  | 14.71 | 12.32 | 13.84 | 14.23 | 8.24E-26  | 6.00E-15 | 6.09E-05 | 7.79E-02 | 3.50E-12 | 4.23E-14 | 2.27E-01 |
| 433.86127 | 50.05  | 17.44 | 18.84 | 19.29 | 19.10 | 5.68E-46  | 5.11E-15 | 5.11E-15 | 5.11E-15 | 2.63E-04 | 9.69E-02 | 3.15E-01 |
| 433.87172 | 29.13  | 15.19 | 15.67 | 15.83 | 15.46 | 4.71E-01  | 6.73E-01 | 4.27E-01 | 9.27E-01 | 9.83E-01 | 9.65E-01 | 8.37E-01 |
| 433.93309 | 25.29  | 15.37 | 18.07 | 17.63 | 17.60 | 2.33E-35  | 5.11E-15 | 7.77E-15 | 1.62E-14 | 9.87E-02 | 8.92E-02 | 9.99E-01 |
| 433.94389 | 39.71  | 15.51 | 17.51 | 17.82 | 16.97 | 6.07E-29  | 3.15E-14 | 5.33E-15 | 2.09E-12 | 3.52E-01 | 3.11E-02 | 9.87E-05 |

|           |        |       |       |       |       |           |          |          |          |          |          |          |
|-----------|--------|-------|-------|-------|-------|-----------|----------|----------|----------|----------|----------|----------|
| 433.97581 | 22.63  | 18.30 | 15.65 | 15.65 | 15.88 | 3.96E-10  | 3.53E-08 | 2.78E-08 | 1.16E-06 | 1.00E+00 | 9.56E-01 | 9.58E-01 |
| 434.00549 | 34.23  | 16.88 | 18.50 | 18.51 | 17.37 | 5.09E-40  | 5.11E-15 | 5.11E-15 | 3.72E-04 | 1.00E+00 | 4.22E-14 | 4.20E-14 |
| 434.01953 | 49.66  | 14.45 | 17.33 | 17.79 | 16.19 | 9.24E-30  | 2.69E-14 | 5.11E-15 | 3.80E-09 | 2.99E-01 | 3.01E-04 | 9.35E-08 |
| 434.21784 | 161.05 | 13.70 | 12.56 | 13.99 | 13.27 | 1.05E-04  | 1.93E-03 | 7.89E-01 | 5.36E-01 | 7.46E-05 | 1.43E-01 | 1.27E-01 |
| 434.23798 | 157.1  | 19.04 | 18.95 | 19.46 | 19.01 | 2.49E-02  | 9.67E-01 | 8.11E-02 | 9.99E-01 | 3.02E-02 | 9.90E-01 | 8.03E-02 |
| 434.26728 | 186.6  | 18.83 | 18.04 | 18.25 | 17.93 | 1.95E-05  | 2.72E-04 | 1.27E-02 | 3.77E-05 | 6.97E-01 | 9.43E-01 | 3.65E-01 |
| 434.29504 | 190.92 | 13.33 | 12.74 | 13.35 | 11.94 | 4.63E-03  | 5.04E-01 | 1.00E+00 | 7.68E-03 | 4.86E-01 | 2.65E-01 | 7.80E-03 |
| 434.30349 | 172.59 | 10.39 | 13.44 | 12.23 | 11.72 | 1.36E-09  | 1.90E-10 | 1.77E-04 | 1.70E-02 | 3.54E-02 | 1.36E-03 | 6.81E-01 |
| 434.33958 | 296.41 | 14.09 | 13.65 | 15.11 | 13.49 | 3.24E-03  | 7.69E-01 | 1.09E-01 | 5.69E-01 | 1.01E-02 | 9.86E-01 | 4.22E-03 |
| 434.73014 | 94.72  | 13.48 | 12.96 | 13.32 | 13.37 | 2.40E-02  | 1.52E-02 | 8.00E-01 | 9.23E-01 | 1.67E-01 | 1.14E-01 | 9.95E-01 |
| 434.74819 | 77.9   | 15.30 | 15.45 | 15.92 | 15.61 | 3.11E-06  | 5.53E-01 | 1.16E-06 | 5.47E-02 | 6.60E-04 | 6.05E-01 | 5.04E-02 |
| 434.79526 | 54.09  | 20.99 | 21.07 | 22.09 | 21.77 | 8.13E-26  | 8.96E-01 | 3.04E-14 | 1.35E-11 | 4.35E-14 | 2.16E-09 | 1.50E-02 |
| 434.81588 | 57.74  | 17.03 | 15.79 | 17.99 | 17.69 | 8.34E-48  | 3.89E-14 | 9.19E-14 | 5.21E-07 | 5.11E-15 | 5.11E-15 | 6.69E-02 |
| 434.83228 | 145.73 | 16.45 | 15.19 | 15.62 | 15.94 | 9.95E-10  | 2.89E-10 | 3.77E-05 | 3.35E-02 | 1.03E-01 | 7.41E-04 | 3.30E-01 |
| 434.85581 | 40.87  | 20.23 | 20.72 | 21.30 | 21.19 | 1.36E-41  | 3.72E-11 | 5.11E-15 | 5.11E-15 | 6.57E-14 | 1.26E-09 | 4.14E-01 |
| 434.90651 | 29.2   | 14.00 | 12.71 | 14.06 | 13.80 | 5.42E-04  | 1.61E-03 | 9.98E-01 | 9.48E-01 | 1.10E-03 | 1.75E-02 | 8.94E-01 |
| 434.92792 | 32.18  | 10.71 | 12.81 | 14.02 | 12.76 | 2.82E-10  | 5.40E-05 | 4.53E-11 | 1.35E-04 | 5.18E-02 | 1.00E+00 | 4.71E-02 |
| 434.95541 | 37.58  | 15.33 | 17.73 | 18.24 | 18.01 | 5.09E-18  | 2.16E-11 | 4.42E-14 | 4.67E-13 | 4.35E-01 | 8.52E-01 | 9.12E-01 |
| 434.99888 | 56.74  | 14.79 | 15.58 | 11.64 | 12.65 | 2.98E-50  | 1.37E-03 | 5.11E-15 | 4.29E-14 | 5.11E-15 | 5.11E-15 | 4.87E-05 |
| 435.05514 | 18.39  | 15.34 | 16.56 | 15.65 | 16.12 | 1.81E-03  | 1.29E-03 | 7.69E-01 | 9.26E-02 | 3.36E-02 | 5.77E-01 | 5.13E-01 |
| 435.08175 | 197.36 | 17.84 | 17.08 | 17.39 | 16.97 | 3.25E-27  | 3.73E-14 | 1.17E-08 | 7.99E-15 | 1.68E-04 | 3.98E-01 | 1.77E-07 |
| 435.11995 | 17.58  | 19.06 | 20.58 | 20.57 | 20.36 | 1.68E-08  | 4.61E-07 | 4.21E-07 | 3.24E-05 | 1.00E+00 | 8.81E-01 | 8.92E-01 |
| 435.24038 | 161.63 | 17.29 | 16.82 | 17.34 | 16.97 | 5.69E-03  | 2.44E-02 | 9.91E-01 | 2.44E-01 | 1.23E-02 | 8.13E-01 | 1.51E-01 |
| 435.2521  | 174.35 | 16.70 | 17.61 | 17.88 | 17.57 | 7.15E-11  | 8.08E-07 | 8.64E-11 | 5.05E-06 | 3.92E-01 | 9.95E-01 | 2.86E-01 |
| 435.27343 | 204.2  | 18.74 | 18.82 | 19.15 | 18.29 | 3.28E-03  | 9.83E-01 | 2.18E-01 | 1.88E-01 | 4.28E-01 | 1.01E-01 | 1.07E-03 |
| 435.28862 | 188.86 | 15.02 | 10.62 | 9.73  | 10.57 | 4.54E-49  | 5.11E-15 | 5.11E-15 | 5.11E-15 | 1.60E-02 | 9.98E-01 | 3.36E-02 |
| 435.79871 | 63.61  | 16.39 | 15.58 | 17.60 | 17.21 | 2.77E-35  | 4.17E-08 | 4.37E-14 | 9.15E-08 | 5.11E-15 | 1.62E-14 | 3.23E-02 |
| 435.85853 | 52.15  | 15.31 | 15.65 | 16.28 | 16.24 | 2.98E-20  | 5.99E-03 | 4.31E-14 | 4.72E-14 | 1.06E-07 | 1.34E-06 | 9.89E-01 |
| 435.95356 | 42.87  | 16.54 | 18.03 | 18.25 | 17.86 | 3.27E-12  | 8.74E-09 | 2.26E-11 | 7.66E-07 | 7.79E-01 | 9.06E-01 | 3.76E-01 |
| 436.03078 | 22.95  | 13.30 | 13.02 | 13.99 | 13.22 | 1.54E-01  | 9.18E-01 | 3.79E-01 | 9.98E-01 | 1.31E-01 | 9.73E-01 | 3.28E-01 |
| 436.08227 | 193.42 | 14.55 | 12.04 | 12.74 | 11.26 | 2.33E-19  | 1.11E-12 | 1.91E-07 | 4.31E-14 | 1.48E-01 | 9.38E-02 | 8.79E-05 |
| 436.12368 | 18.1   | 16.14 | 17.51 | 17.48 | 17.50 | 3.84E-07  | 1.16E-05 | 1.38E-05 | 2.18E-05 | 1.00E+00 | 1.00E+00 | 1.00E+00 |
| 436.25127 | 170.59 | 17.27 | 17.12 | 17.61 | 16.97 | 2.43E-03  | 7.99E-01 | 1.62E-01 | 3.04E-01 | 2.04E-02 | 8.39E-01 | 1.65E-03 |
| 436.28395 | 227.69 | 24.34 | 24.59 | 24.31 | 24.17 | 8.84E-03  | 1.50E-01 | 9.92E-01 | 4.77E-01 | 8.93E-02 | 4.29E-03 | 6.64E-01 |
| 436.74581 | 90.06  | 14.46 | 14.05 | 14.54 | 14.14 | 1.91E-03  | 2.55E-02 | 9.41E-01 | 1.34E-01 | 5.51E-03 | 9.40E-01 | 4.01E-02 |
| 436.77454 | 91.7   | 13.72 | 13.53 | 14.08 | 13.85 | 4.80E-02  | 7.63E-01 | 2.38E-01 | 9.11E-01 | 2.94E-02 | 3.98E-01 | 6.69E-01 |
| 436.79335 | 61.91  | 19.37 | 19.41 | 20.46 | 20.16 | 2.46E-23  | 9.90E-01 | 4.24E-14 | 2.17E-10 | 4.22E-14 | 3.30E-09 | 4.74E-02 |
| 436.81085 | 57.16  | 20.45 | 20.57 | 21.63 | 21.35 | 5.35E-27  | 7.00E-01 | 2.31E-14 | 1.47E-13 | 4.40E-14 | 2.14E-10 | 6.17E-02 |
| 436.82353 | 154.05 | 14.21 | 9.29  | 7.93  | 12.27 | 1.15E-27  | 4.24E-14 | 6.22E-15 | 1.94E-03 | 5.34E-02 | 8.63E-07 | 5.21E-13 |
| 436.85131 | 45.51  | 17.30 | 16.02 | 17.69 | 17.64 | 2.36E-45  | 5.11E-15 | 2.95E-04 | 3.45E-03 | 5.11E-15 | 5.11E-15 | 9.57E-01 |
| 436.86575 | 42.21  | 15.40 | 14.83 | 15.02 | 15.17 | 2.97E-01  | 2.37E-01 | 5.95E-01 | 8.78E-01 | 9.21E-01 | 7.13E-01 | 9.69E-01 |
| 436.97549 | 52.74  | 14.87 | 14.33 | 16.19 | 16.36 | 2.09E-17  | 1.01E-01 | 2.95E-07 | 1.78E-08 | 2.18E-12 | 1.65E-13 | 8.90E-01 |
| 437.00994 | 30.24  | 13.09 | 16.35 | 16.81 | 15.30 | 1.55E-28  | 3.22E-14 | 5.33E-15 | 6.73E-11 | 4.42E-01 | 5.83E-03 | 1.70E-05 |
| 437.03523 | 24.35  | 12.44 | 15.52 | 15.17 | 15.12 | 3.70E-13  | 1.75E-11 | 1.57E-09 | 1.08E-08 | 8.47E-01 | 8.02E-01 | 9.99E-01 |
| 437.07432 | 55.17  | 15.65 | 18.41 | 14.79 | 15.10 | 1.57E-120 | 5.11E-15 | 1.78E-14 | 1.18E-10 | 5.11E-15 | 5.11E-15 | 9.98E-04 |



|           |        |       |       |       |       |           |          |          |          |          |          |          |
|-----------|--------|-------|-------|-------|-------|-----------|----------|----------|----------|----------|----------|----------|
| 437.11578 | 17.02  | 12.28 | 13.95 | 13.82 | 13.88 | 8.48E-03  | 1.86E-02 | 3.32E-02 | 3.20E-02 | 9.96E-01 | 9.99E-01 | 1.00E+00 |
| 437.19215 | 204.78 | 12.00 | 15.15 | 14.73 | 15.32 | 1.27E-17  | 1.11E-13 | 4.23E-11 | 5.84E-14 | 6.95E-01 | 9.72E-01 | 4.34E-01 |
| 437.19229 | 63.71  | 8.64  | 16.81 | 8.36  | 10.03 | 1.00E-44  | 5.11E-15 | 9.42E-01 | 4.00E-02 | 5.11E-15 | 5.33E-15 | 9.68E-03 |
| 437.24311 | 201.05 | 19.46 | 19.28 | 19.56 | 18.64 | 5.43E-02  | 9.50E-01 | 9.92E-01 | 8.93E-02 | 8.51E-01 | 2.86E-01 | 5.09E-02 |
| 437.26783 | 184.19 | 18.25 | 18.89 | 19.28 | 18.88 | 4.66E-06  | 5.48E-03 | 1.07E-06 | 8.31E-03 | 2.04E-01 | 1.00E+00 | 2.07E-01 |
| 437.29028 | 228.85 | 24.03 | 24.22 | 24.17 | 23.54 | 2.35E-03  | 7.34E-01 | 8.50E-01 | 4.75E-02 | 9.96E-01 | 3.04E-03 | 5.66E-03 |
| 437.29112 | 32.91  | 10.25 | 12.71 | 10.16 | 12.97 | 1.24E-05  | 2.53E-03 | 9.99E-01 | 9.26E-04 | 2.09E-03 | 9.84E-01 | 7.70E-04 |
| 437.79665 | 64.95  | 14.20 | 12.13 | 15.31 | 14.83 | 8.07E-31  | 4.34E-14 | 1.38E-05 | 4.29E-02 | 5.11E-15 | 2.66E-14 | 1.92E-01 |
| 437.81428 | 58.06  | 15.95 | 15.13 | 16.97 | 16.63 | 9.09E-34  | 2.95E-09 | 2.19E-13 | 2.05E-06 | 5.11E-15 | 1.98E-14 | 5.49E-02 |
| 437.95995 | 19.77  | 12.66 | 16.59 | 16.54 | 15.98 | 4.92E-30  | 7.77E-15 | 8.88E-15 | 4.35E-14 | 9.98E-01 | 3.03E-01 | 3.81E-01 |
| 437.97234 | 48.82  | 14.59 | 16.61 | 18.01 | 17.27 | 2.35E-18  | 1.96E-07 | 4.26E-14 | 1.50E-11 | 6.62E-04 | 2.82E-01 | 1.81E-01 |
| 437.99319 | 30.96  | 10.66 | 13.15 | 14.13 | 12.20 | 9.57E-31  | 4.24E-14 | 5.11E-15 | 7.39E-08 | 1.24E-03 | 2.49E-03 | 3.89E-11 |
| 438.07678 | 32.34  | 17.12 | 17.77 | 17.96 | 17.30 | 7.95E-09  | 4.45E-05 | 4.30E-08 | 5.77E-01 | 5.32E-01 | 1.16E-02 | 8.12E-05 |
| 438.13511 | 17.31  | 14.04 | 17.74 | 12.17 | 12.78 | 7.13E-101 | 5.11E-15 | 5.11E-15 | 6.26E-14 | 5.11E-15 | 5.11E-15 | 4.71E-04 |
| 438.24624 | 198.96 | 16.68 | 16.35 | 16.69 | 17.16 | 6.40E-02  | 6.40E-01 | 1.00E+00 | 3.44E-01 | 6.35E-01 | 3.35E-02 | 3.78E-01 |
| 438.26687 | 189.18 | 17.59 | 17.39 | 17.76 | 17.37 | 1.10E-01  | 6.61E-01 | 7.74E-01 | 5.91E-01 | 1.72E-01 | 9.99E-01 | 1.44E-01 |
| 438.2947  | 235.67 | 22.06 | 22.03 | 21.98 | 21.33 | 2.90E-03  | 9.99E-01 | 9.76E-01 | 4.18E-03 | 9.95E-01 | 9.19E-03 | 1.78E-02 |
| 438.77228 | 85.42  | 13.27 | 14.13 | 14.94 | 14.69 | 1.48E-12  | 6.96E-04 | 3.95E-12 | 9.94E-09 | 2.34E-03 | 7.78E-02 | 7.12E-01 |
| 438.78217 | 76.53  | 14.51 | 11.99 | 13.45 | 14.04 | 1.53E-20  | 3.70E-14 | 7.46E-05 | 2.23E-01 | 4.02E-08 | 1.95E-13 | 9.05E-02 |
| 438.7915  | 55.12  | 15.79 | 14.58 | 17.20 | 16.80 | 5.43E-33  | 2.13E-09 | 2.38E-12 | 1.59E-06 | 5.11E-15 | 1.64E-14 | 1.54E-01 |
| 438.81318 | 49.19  | 19.57 | 18.95 | 19.98 | 19.84 | 1.28E-16  | 4.65E-07 | 1.41E-03 | 8.28E-02 | 4.31E-14 | 5.39E-12 | 6.36E-01 |
| 438.82319 | 39.09  | 19.51 | 19.58 | 19.87 | 20.10 | 6.71E-06  | 9.34E-01 | 1.49E-02 | 1.43E-05 | 8.99E-02 | 2.78E-04 | 2.35E-01 |
| 438.84259 | 102.22 | 14.15 | 10.82 | 12.91 | 13.66 | 1.38E-11  | 1.29E-11 | 2.94E-02 | 7.18E-01 | 4.31E-05 | 4.01E-08 | 3.78E-01 |
| 438.8657  | 112.43 | 16.56 | 13.55 | 13.93 | 14.67 | 1.31E-31  | 5.11E-15 | 1.02E-14 | 2.24E-13 | 3.60E-01 | 2.68E-05 | 1.01E-02 |
| 438.88686 | 35.97  | 20.16 | 22.05 | 21.71 | 21.69 | 9.71E-26  | 1.40E-14 | 4.33E-14 | 4.44E-14 | 1.79E-01 | 1.62E-01 | 9.99E-01 |
| 438.94426 | 38.99  | 15.42 | 17.22 | 16.76 | 17.23 | 2.23E-10  | 7.35E-09 | 1.88E-05 | 1.31E-08 | 3.93E-01 | 1.00E+00 | 3.84E-01 |
| 439.05401 | 33.57  | 15.14 | 17.65 | 14.80 | 14.59 | 4.49E-29  | 3.92E-14 | 4.83E-01 | 1.26E-01 | 1.53E-14 | 7.77E-15 | 8.51E-01 |
| 439.06982 | 25.37  | 17.23 | 16.86 | 16.97 | 16.97 | 1.27E-01  | 9.63E-02 | 3.72E-01 | 3.90E-01 | 8.94E-01 | 9.12E-01 | 1.00E+00 |
| 439.08707 | 20.81  | 14.97 | 17.53 | 17.35 | 17.18 | 3.16E-24  | 3.71E-14 | 4.24E-14 | 4.24E-14 | 8.79E-01 | 5.15E-01 | 9.11E-01 |
| 439.16792 | 231.45 | 15.57 | 13.25 | 14.68 | 15.05 | 2.12E-08  | 6.65E-09 | 7.02E-02 | 5.03E-01 | 8.64E-04 | 2.99E-05 | 7.75E-01 |
| 439.22579 | 168.41 | 15.14 | 12.54 | 12.15 | 13.26 | 2.89E-27  | 3.97E-14 | 6.66E-15 | 1.78E-11 | 4.12E-01 | 3.40E-02 | 1.73E-04 |
| 439.24505 | 231.82 | 17.26 | 16.47 | 17.15 | 17.81 | 7.02E-08  | 6.36E-04 | 9.44E-01 | 4.39E-02 | 5.82E-03 | 9.66E-09 | 1.11E-02 |
| 439.26909 | 201.12 | 18.16 | 17.98 | 18.14 | 17.92 | 7.56E-01  | 8.93E-01 | 1.00E+00 | 7.99E-01 | 9.27E-01 | 9.97E-01 | 8.47E-01 |
| 439.29853 | 229.59 | 18.89 | 18.80 | 18.74 | 18.01 | 9.64E-03  | 9.87E-01 | 9.43E-01 | 9.32E-03 | 9.96E-01 | 3.07E-02 | 5.13E-02 |
| 439.30715 | 243.05 | 20.74 | 20.73 | 20.79 | 20.34 | 2.73E-01  | 1.00E+00 | 9.96E-01 | 3.73E-01 | 9.94E-01 | 4.16E-01 | 2.77E-01 |
| 439.81219 | 61.84  | 12.53 | 10.56 | 13.22 | 12.76 | 8.76E-06  | 1.21E-03 | 5.44E-01 | 9.74E-01 | 7.50E-06 | 5.27E-04 | 8.34E-01 |
| 439.89021 | 39.54  | 15.83 | 17.98 | 17.72 | 17.57 | 3.71E-24  | 3.09E-14 | 4.32E-14 | 5.51E-14 | 5.66E-01 | 1.99E-01 | 8.84E-01 |
| 439.92123 | 22.06  | 13.98 | 14.78 | 14.92 | 15.09 | 3.65E-02  | 2.01E-01 | 9.27E-02 | 3.97E-02 | 9.87E-01 | 8.84E-01 | 9.76E-01 |
| 439.97025 | 60.4   | 12.44 | 12.22 | 13.64 | 14.23 | 1.66E-10  | 8.83E-01 | 5.27E-04 | 1.82E-07 | 4.41E-05 | 1.04E-08 | 2.48E-01 |
| 440.04028 | 27.01  | 13.47 | 14.31 | 12.88 | 13.01 | 4.09E-04  | 7.75E-02 | 3.22E-01 | 5.66E-01 | 4.55E-04 | 2.64E-03 | 9.86E-01 |
| 440.31061 | 243.86 | 18.54 | 18.51 | 18.63 | 18.05 | 1.89E-01  | 1.00E+00 | 9.89E-01 | 2.89E-01 | 9.76E-01 | 3.67E-01 | 1.76E-01 |
| 440.7519  | 76.86  | 11.67 | 12.97 | 14.67 | 13.44 | 1.97E-14  | 1.03E-03 | 4.31E-14 | 5.47E-06 | 1.21E-05 | 5.62E-01 | 3.78E-03 |
| 440.76148 | 76.68  | 10.54 | 10.24 | 13.28 | 13.00 | 1.16E-13  | 9.03E-01 | 1.08E-08 | 8.50E-07 | 7.13E-10 | 6.66E-08 | 9.29E-01 |
| 440.80662 | 55.91  | 16.42 | 15.16 | 16.21 | 16.02 | 3.10E-16  | 4.26E-14 | 4.40E-01 | 2.56E-02 | 1.47E-11 | 1.15E-07 | 5.25E-01 |
| 440.82728 | 44.15  | 17.24 | 17.78 | 16.75 | 17.41 | 1.01E-01  | 5.46E-01 | 6.06E-01 | 9.77E-01 | 6.29E-02 | 8.24E-01 | 3.99E-01 |

|           |        |       |       |       |       |          |          |          |          |          |          |          |
|-----------|--------|-------|-------|-------|-------|----------|----------|----------|----------|----------|----------|----------|
| 440.88365 | 43.91  | 17.63 | 17.65 | 17.29 | 17.24 | 5.06E-02 | 1.00E+00 | 2.39E-01 | 1.57E-01 | 2.18E-01 | 1.44E-01 | 9.93E-01 |
| 440.90249 | 41.7   | 19.55 | 21.75 | 21.47 | 21.38 | 3.51E-32 | 5.11E-15 | 1.40E-14 | 3.55E-14 | 3.57E-01 | 1.71E-01 | 9.66E-01 |
| 440.98584 | 74.1   | 13.80 | 15.52 | 11.79 | 12.53 | 2.12E-66 | 1.15E-14 | 5.11E-15 | 8.82E-14 | 5.11E-15 | 5.11E-15 | 1.73E-05 |
| 441.06642 | 24.86  | 15.14 | 14.25 | 14.41 | 14.37 | 3.03E-02 | 3.65E-02 | 1.10E-01 | 1.01E-01 | 9.68E-01 | 9.88E-01 | 9.99E-01 |
| 441.14577 | 87.16  | 13.78 | 13.28 | 15.54 | 15.50 | 6.80E-14 | 4.00E-01 | 3.75E-07 | 1.65E-06 | 2.12E-10 | 1.42E-09 | 1.00E+00 |
| 441.25123 | 164.82 | 17.10 | 16.89 | 16.54 | 17.67 | 9.70E-08 | 6.38E-01 | 8.64E-03 | 8.62E-03 | 2.13E-01 | 2.00E-04 | 2.03E-08 |
| 441.25413 | 290.2  | 10.87 | 17.09 | 16.88 | 13.45 | 3.57E-39 | 5.11E-15 | 5.11E-15 | 9.42E-08 | 9.65E-01 | 3.57E-13 | 3.70E-12 |
| 441.26321 | 261.95 | 20.79 | 22.01 | 22.01 | 22.03 | 8.47E-16 | 5.45E-12 | 3.31E-12 | 8.77E-12 | 1.00E+00 | 9.99E-01 | 1.00E+00 |
| 441.27833 | 254.87 | 17.73 | 17.48 | 17.14 | 17.38 | 2.09E-01 | 8.02E-01 | 1.44E-01 | 6.12E-01 | 6.34E-01 | 9.87E-01 | 8.43E-01 |
| 441.2797  | 172.14 | 14.04 | 13.76 | 13.92 | 12.94 | 1.34E-03 | 7.58E-01 | 9.72E-01 | 1.11E-03 | 9.48E-01 | 3.23E-02 | 6.06E-03 |
| 441.32305 | 256.96 | 18.34 | 17.62 | 17.59 | 17.47 | 1.37E-04 | 3.26E-03 | 1.82E-03 | 3.80E-04 | 9.99E-01 | 9.15E-01 | 9.51E-01 |
| 441.89523 | 32.51  | 13.68 | 14.82 | 15.05 | 13.75 | 2.66E-07 | 4.20E-04 | 1.03E-05 | 9.95E-01 | 8.50E-01 | 2.17E-03 | 8.91E-05 |
| 441.90598 | 41.96  | 14.85 | 17.39 | 17.02 | 16.97 | 2.04E-27 | 9.33E-15 | 4.29E-14 | 4.37E-14 | 3.42E-01 | 2.50E-01 | 9.95E-01 |
| 442.01811 | 19.86  | 17.93 | 21.62 | 21.37 | 21.21 | 8.24E-51 | 5.11E-15 | 5.11E-15 | 5.11E-15 | 6.44E-01 | 2.46E-01 | 8.82E-01 |
| 442.08936 | 77.09  | 13.96 | 13.89 | 15.08 | 15.03 | 1.06E-08 | 9.90E-01 | 1.49E-05 | 6.73E-05 | 7.15E-06 | 3.24E-05 | 9.98E-01 |
| 442.25626 | 162.56 | 14.39 | 13.92 | 13.18 | 15.00 | 5.14E-08 | 3.33E-01 | 1.31E-04 | 1.57E-01 | 5.46E-02 | 1.93E-03 | 2.04E-08 |
| 442.26624 | 286.47 | 17.72 | 18.71 | 18.55 | 19.06 | 9.70E-15 | 2.85E-09 | 5.69E-07 | 5.55E-14 | 7.32E-01 | 1.41E-01 | 9.33E-03 |
| 442.29977 | 189.62 | 14.78 | 13.37 | 13.77 | 13.61 | 1.64E-05 | 1.80E-05 | 3.37E-03 | 8.58E-04 | 5.53E-01 | 8.60E-01 | 9.61E-01 |
| 442.76156 | 73.61  | 18.54 | 19.01 | 19.41 | 18.85 | 3.99E-10 | 9.63E-04 | 5.33E-11 | 7.14E-02 | 7.29E-03 | 5.97E-01 | 8.82E-05 |
| 442.82055 | 69.92  | 18.12 | 16.71 | 17.04 | 16.72 | 3.69E-21 | 4.24E-14 | 8.76E-12 | 4.24E-14 | 1.24E-01 | 1.00E+00 | 1.60E-01 |
| 442.8414  | 42.93  | 20.62 | 20.21 | 20.49 | 20.57 | 9.01E-02 | 7.53E-02 | 8.57E-01 | 9.91E-01 | 3.77E-01 | 1.86E-01 | 9.67E-01 |
| 442.87495 | 39.56  | 13.61 | 13.68 | 13.82 | 12.92 | 2.79E-01 | 9.99E-01 | 9.68E-01 | 4.74E-01 | 9.91E-01 | 4.13E-01 | 2.53E-01 |
| 442.89808 | 35.64  | 17.24 | 19.51 | 19.49 | 19.55 | 4.81E-41 | 5.11E-15 | 5.11E-15 | 5.11E-15 | 1.00E+00 | 9.95E-01 | 9.89E-01 |
| 442.95684 | 45.59  | 15.92 | 14.60 | 14.97 | 15.21 | 1.11E-02 | 6.22E-03 | 8.38E-02 | 3.17E-01 | 7.94E-01 | 4.67E-01 | 9.41E-01 |
| 443.05275 | 22.49  | 11.86 | 14.96 | 15.63 | 13.92 | 4.67E-35 | 7.55E-15 | 5.11E-15 | 1.74E-12 | 5.67E-02 | 1.12E-03 | 9.76E-09 |
| 443.26034 | 276.11 | 18.97 | 20.16 | 20.13 | 20.45 | 2.96E-19 | 8.87E-13 | 1.74E-12 | 4.42E-14 | 9.98E-01 | 2.75E-01 | 1.93E-01 |
| 443.30196 | 212.96 | 16.08 | 16.34 | 16.07 | 16.03 | 7.10E-01 | 7.96E-01 | 1.00E+00 | 9.98E-01 | 7.82E-01 | 7.29E-01 | 9.99E-01 |
| 443.33824 | 283.52 | 18.28 | 16.77 | 16.78 | 17.08 | 6.07E-08 | 8.96E-07 | 9.09E-07 | 2.36E-04 | 1.00E+00 | 7.08E-01 | 7.33E-01 |
| 443.8431  | 62.8   | 15.75 | 14.84 | 14.65 | 14.77 | 6.96E-07 | 1.50E-04 | 2.53E-06 | 6.14E-05 | 8.31E-01 | 9.89E-01 | 9.56E-01 |
| 443.87968 | 33.41  | 16.73 | 16.09 | 16.79 | 15.51 | 1.91E-02 | 4.64E-01 | 9.99E-01 | 3.65E-02 | 4.01E-01 | 5.96E-01 | 2.94E-02 |
| 443.90027 | 37.48  | 13.05 | 12.96 | 11.96 | 14.45 | 5.85E-14 | 9.88E-01 | 3.94E-04 | 6.15E-06 | 2.04E-03 | 2.74E-06 | 4.73E-14 |
| 443.97969 | 31.08  | 11.91 | 12.95 | 14.95 | 11.68 | 1.71E-13 | 6.06E-02 | 1.88E-11 | 9.50E-01 | 2.64E-05 | 2.09E-02 | 8.24E-12 |
| 444.02335 | 19.79  | 17.28 | 19.74 | 18.80 | 18.48 | 1.66E-19 | 3.69E-14 | 1.71E-09 | 6.28E-06 | 5.95E-04 | 3.47E-06 | 5.42E-01 |
| 444.03409 | 19.47  | 17.41 | 21.38 | 20.46 | 19.75 | 3.56E-28 | 5.11E-15 | 4.13E-14 | 1.83E-11 | 1.98E-02 | 7.19E-06 | 1.31E-01 |
| 444.26343 | 290.08 | 16.65 | 16.92 | 16.80 | 17.18 | 1.31E-01 | 6.20E-01 | 9.02E-01 | 8.98E-02 | 9.54E-01 | 6.66E-01 | 3.49E-01 |
| 444.29703 | 190.7  | 15.65 | 15.50 | 15.19 | 15.89 | 4.99E-08 | 5.28E-01 | 1.68E-04 | 1.17E-01 | 2.68E-02 | 3.61E-03 | 1.34E-08 |
| 444.31585 | 192.35 | 16.83 | 16.68 | 16.75 | 16.22 | 6.63E-04 | 7.31E-01 | 9.44E-01 | 4.91E-04 | 9.66E-01 | 2.02E-02 | 4.46E-03 |
| 444.33362 | 190.17 | 16.01 | 20.58 | 20.55 | 19.17 | 1.08E-37 | 5.11E-15 | 5.11E-15 | 4.22E-14 | 1.00E+00 | 2.55E-04 | 3.07E-04 |
| 444.75972 | 74.95  | 16.36 | 17.50 | 17.75 | 17.08 | 4.34E-24 | 4.37E-14 | 1.64E-14 | 1.89E-07 | 1.89E-01 | 8.44E-03 | 2.87E-06 |
| 444.77735 | 72.73  | 18.80 | 19.64 | 19.98 | 19.22 | 1.15E-20 | 1.43E-11 | 3.77E-14 | 2.00E-03 | 1.93E-02 | 2.98E-03 | 5.38E-09 |
| 444.81751 | 85.46  | 13.58 | 12.67 | 12.94 | 12.67 | 7.73E-02 | 1.01E-01 | 3.58E-01 | 1.16E-01 | 9.12E-01 | 1.00E+00 | 9.18E-01 |
| 444.8352  | 39.79  | 18.10 | 18.01 | 18.74 | 18.13 | 4.39E-09 | 8.48E-01 | 6.47E-07 | 9.95E-01 | 2.40E-08 | 7.45E-01 | 8.19E-06 |
| 444.89217 | 36.93  | 15.94 | 17.22 | 17.14 | 16.97 | 4.27E-21 | 4.43E-14 | 4.37E-14 | 4.22E-12 | 9.37E-01 | 2.58E-01 | 5.72E-01 |
| 444.91535 | 48.59  | 18.29 | 17.89 | 18.17 | 18.18 | 3.26E-01 | 2.62E-01 | 9.50E-01 | 9.58E-01 | 5.81E-01 | 6.01E-01 | 1.00E+00 |
| 444.9346  | 49.16  | 16.89 | 18.56 | 18.86 | 18.39 | 8.90E-32 | 1.98E-14 | 5.11E-15 | 4.39E-14 | 2.10E-01 | 7.07E-01 | 1.66E-02 |

|           |        |       |       |       |       |           |          |          |          |          |          |          |
|-----------|--------|-------|-------|-------|-------|-----------|----------|----------|----------|----------|----------|----------|
| 444.96633 | 25.41  | 12.15 | 16.21 | 15.71 | 15.22 | 4.40E-27  | 9.55E-15 | 3.89E-14 | 4.77E-14 | 4.83E-01 | 3.24E-02 | 5.13E-01 |
| 444.97349 | 23.19  | 16.79 | 19.98 | 19.89 | 19.49 | 7.00E-31  | 6.00E-15 | 7.33E-15 | 4.20E-14 | 9.87E-01 | 2.80E-01 | 4.54E-01 |
| 445.00834 | 18.28  | 16.37 | 19.84 | 19.66 | 18.72 | 2.90E-22  | 4.32E-14 | 4.42E-14 | 8.87E-10 | 9.55E-01 | 1.04E-02 | 4.16E-02 |
| 445.03743 | 19.01  | 13.69 | 17.58 | 15.61 | 15.22 | 2.36E-15  | 4.42E-14 | 4.19E-05 | 2.68E-03 | 4.07E-05 | 1.46E-06 | 8.16E-01 |
| 445.0562  | 31.38  | 18.96 | 22.35 | 20.60 | 20.30 | 3.72E-62  | 5.11E-15 | 7.33E-15 | 4.44E-14 | 5.33E-15 | 5.11E-15 | 1.68E-01 |
| 445.08253 | 30.81  | 7.43  | 15.56 | 7.10  | 7.47  | 1.36E-100 | 5.11E-15 | 5.12E-01 | 9.98E-01 | 5.11E-15 | 5.11E-15 | 4.48E-01 |
| 445.18744 | 168.05 | 13.90 | 13.65 | 14.02 | 13.54 | 7.88E-02  | 5.75E-01 | 9.26E-01 | 2.88E-01 | 2.50E-01 | 9.56E-01 | 9.52E-02 |
| 445.25979 | 223.94 | 12.78 | 14.78 | 15.36 | 15.14 | 4.81E-12  | 5.32E-07 | 6.03E-11 | 7.63E-09 | 4.05E-01 | 7.92E-01 | 9.36E-01 |
| 445.28124 | 156.93 | 14.39 | 13.61 | 13.33 | 14.15 | 2.02E-03  | 4.72E-02 | 2.46E-03 | 8.69E-01 | 8.01E-01 | 3.12E-01 | 4.52E-02 |
| 445.31774 | 265.9  | 17.59 | 16.99 | 16.67 | 16.70 | 3.29E-09  | 6.50E-04 | 2.17E-08 | 2.34E-07 | 1.51E-01 | 2.70E-01 | 9.95E-01 |
| 445.33571 | 199.59 | 13.97 | 18.60 | 18.59 | 17.56 | 1.41E-98  | 5.11E-15 | 5.11E-15 | 5.11E-15 | 1.00E+00 | 7.13E-11 | 6.04E-11 |
| 445.78068 | 79.88  | 11.45 | 12.78 | 13.03 | 12.61 | 1.41E-06  | 1.02E-04 | 1.96E-06 | 1.38E-03 | 8.50E-01 | 9.51E-01 | 5.46E-01 |
| 445.9105  | 37.38  | 14.29 | 14.06 | 15.11 | 14.08 | 7.42E-02  | 9.56E-01 | 2.42E-01 | 9.65E-01 | 9.60E-02 | 1.00E+00 | 1.16E-01 |
| 446.01111 | 17.34  | 12.25 | 16.04 | 15.89 | 14.88 | 3.22E-23  | 4.06E-14 | 4.13E-14 | 1.32E-10 | 9.79E-01 | 1.55E-02 | 4.31E-02 |
| 446.0651  | 53.22  | 13.82 | 18.74 | 11.88 | 12.54 | 1.42E-158 | 5.11E-15 | 5.11E-15 | 5.11E-15 | 5.11E-15 | 5.11E-15 | 5.69E-10 |
| 446.19982 | 163.66 | 10.58 | 11.33 | 11.91 | 10.44 | 1.40E-04  | 1.40E-01 | 9.47E-04 | 9.80E-01 | 3.75E-01 | 7.66E-02 | 4.81E-04 |
| 446.31275 | 206.11 | 15.56 | 15.90 | 15.52 | 16.24 | 1.40E-03  | 2.90E-01 | 9.97E-01 | 4.23E-03 | 2.18E-01 | 3.58E-01 | 2.75E-03 |
| 446.32104 | 219.89 | 15.19 | 15.51 | 14.79 | 15.06 | 6.61E-01  | 9.40E-01 | 8.91E-01 | 9.96E-01 | 5.92E-01 | 8.74E-01 | 9.67E-01 |
| 446.33146 | 204.76 | 16.65 | 16.40 | 16.31 | 16.00 | 5.09E-03  | 4.94E-01 | 1.95E-01 | 1.91E-03 | 9.47E-01 | 1.25E-01 | 3.33E-01 |
| 446.33884 | 194.84 | 12.50 | 14.47 | 13.90 | 13.01 | 5.55E-14  | 2.93E-13 | 1.40E-07 | 1.74E-01 | 1.02E-01 | 2.60E-07 | 3.36E-03 |
| 446.76804 | 82.7   | 15.39 | 12.44 | 13.77 | 14.50 | 7.20E-22  | 2.20E-14 | 1.39E-08 | 5.63E-03 | 9.26E-06 | 1.80E-11 | 4.40E-02 |
| 446.77593 | 67.91  | 16.15 | 17.11 | 17.76 | 16.91 | 3.47E-23  | 1.74E-10 | 9.33E-15 | 1.08E-06 | 3.69E-05 | 5.00E-01 | 6.99E-08 |
| 446.80779 | 86.33  | 14.46 | 14.97 | 15.37 | 15.51 | 2.47E-06  | 6.06E-02 | 6.31E-05 | 6.11E-06 | 2.26E-01 | 6.14E-02 | 9.10E-01 |
| 446.82936 | 39.29  | 15.80 | 15.52 | 16.32 | 15.14 | 5.21E-12  | 2.21E-01 | 2.20E-03 | 7.83E-05 | 1.12E-06 | 6.11E-02 | 1.70E-12 |
| 446.85285 | 148.98 | 16.79 | 14.35 | 14.11 | 15.40 | 8.05E-33  | 6.66E-15 | 5.11E-15 | 7.20E-10 | 6.30E-01 | 9.29E-06 | 2.21E-08 |
| 446.87361 | 51.76  | 20.31 | 20.62 | 21.12 | 21.08 | 9.53E-22  | 1.17E-03 | 4.21E-14 | 4.44E-14 | 6.87E-08 | 1.80E-06 | 9.68E-01 |
| 446.91194 | 46.08  | 15.11 | 12.09 | 13.41 | 13.20 | 3.20E-04  | 9.71E-05 | 6.26E-02 | 3.57E-02 | 2.36E-01 | 4.19E-01 | 9.91E-01 |
| 446.97176 | 43.36  | 15.30 | 15.68 | 15.62 | 16.27 | 1.54E-04  | 2.43E-01 | 4.00E-01 | 3.80E-05 | 9.89E-01 | 3.50E-02 | 1.35E-02 |
| 446.99909 | 66.65  | 15.01 | 18.92 | 13.72 | 14.11 | 1.80E-150 | 5.11E-15 | 5.11E-15 | 1.98E-14 | 5.11E-15 | 5.11E-15 | 2.75E-05 |
| 447.02072 | 33.58  | 13.40 | 16.44 | 14.86 | 14.61 | 4.77E-23  | 8.88E-15 | 1.90E-07 | 4.04E-05 | 3.36E-08 | 6.84E-10 | 7.99E-01 |
| 447.0607  | 29.08  | 16.00 | 18.70 | 18.26 | 17.97 | 2.58E-41  | 5.11E-15 | 5.11E-15 | 1.35E-14 | 4.77E-02 | 2.84E-04 | 3.61E-01 |
| 447.13518 | 30.75  | 14.97 | 15.91 | 15.11 | 15.86 | 7.65E-08  | 5.51E-06 | 8.63E-01 | 3.34E-05 | 2.35E-04 | 9.94E-01 | 9.75E-04 |
| 447.16663 | 160.86 | 13.80 | 13.67 | 13.72 | 13.76 | 9.44E-01  | 9.31E-01 | 9.81E-01 | 9.97E-01 | 9.96E-01 | 9.83E-01 | 9.99E-01 |
| 447.17741 | 71.82  | 14.65 | 11.39 | 14.62 | 15.84 | 2.72E-18  | 1.02E-11 | 1.00E+00 | 4.02E-02 | 3.78E-11 | 4.24E-14 | 3.86E-02 |
| 447.27451 | 228.53 | 22.97 | 23.22 | 23.47 | 23.07 | 3.61E-01  | 8.32E-01 | 3.15E-01 | 9.89E-01 | 8.34E-01 | 9.61E-01 | 5.53E-01 |
| 447.87694 | 51.14  | 15.97 | 15.93 | 16.52 | 16.49 | 2.23E-09  | 9.89E-01 | 4.22E-06 | 3.99E-05 | 1.98E-06 | 1.87E-05 | 9.89E-01 |
| 448.00475 | 96.71  | 14.54 | 16.85 | 16.66 | 16.17 | 9.72E-13  | 1.72E-11 | 4.51E-10 | 4.61E-06 | 9.30E-01 | 1.68E-01 | 4.45E-01 |
| 448.01887 | 26.42  | 14.62 | 16.22 | 15.98 | 15.53 | 2.56E-13  | 1.09E-12 | 9.03E-10 | 1.17E-04 | 6.45E-01 | 8.33E-03 | 1.59E-01 |
| 448.04461 | 17.83  | 16.52 | 19.69 | 19.18 | 18.32 | 6.01E-21  | 4.09E-14 | 4.61E-14 | 2.05E-07 | 3.57E-01 | 1.95E-04 | 4.05E-02 |
| 448.06686 | 26.52  | 14.19 | 14.50 | 14.99 | 15.73 | 1.03E-03  | 8.43E-01 | 1.50E-01 | 6.27E-04 | 5.95E-01 | 1.35E-02 | 2.49E-01 |
| 448.09376 | 20.91  | 13.53 | 15.74 | 15.90 | 14.30 | 2.55E-24  | 4.20E-14 | 3.69E-14 | 6.04E-03 | 8.90E-01 | 5.39E-08 | 8.79E-10 |
| 448.24088 | 185.71 | 17.05 | 16.08 | 16.22 | 14.66 | 2.18E-11  | 7.99E-03 | 2.80E-02 | 1.76E-12 | 9.73E-01 | 6.16E-05 | 7.86E-06 |
| 448.27939 | 232.92 | 21.28 | 21.27 | 21.53 | 21.31 | 5.75E-01  | 1.00E+00 | 6.26E-01 | 9.99E-01 | 6.17E-01 | 9.99E-01 | 7.34E-01 |
| 448.74372 | 189.56 | 16.21 | 14.43 | 14.76 | 14.65 | 9.60E-19  | 4.24E-14 | 3.52E-12 | 6.85E-13 | 3.39E-01 | 6.91E-01 | 9.52E-01 |
| 448.7665  | 84.27  | 15.52 | 13.15 | 14.80 | 14.93 | 4.00E-31  | 5.11E-15 | 1.42E-04 | 4.06E-03 | 4.34E-14 | 4.07E-14 | 8.87E-01 |

|           |        |       |       |       |       |          |          |          |          |          |          |          |
|-----------|--------|-------|-------|-------|-------|----------|----------|----------|----------|----------|----------|----------|
| 448.78639 | 71.02  | 16.40 | 14.37 | 16.45 | 16.49 | 9.63E-32 | 7.33E-15 | 9.93E-01 | 9.59E-01 | 7.11E-15 | 7.77E-15 | 9.96E-01 |
| 448.81133 | 54.5   | 18.35 | 17.87 | 19.14 | 18.91 | 3.20E-22 | 3.27E-04 | 6.13E-10 | 3.04E-05 | 3.75E-14 | 7.11E-14 | 2.54E-01 |
| 448.83186 | 54.25  | 21.21 | 21.91 | 22.64 | 22.43 | 1.14E-40 | 9.93E-13 | 5.11E-15 | 5.11E-15 | 5.22E-13 | 5.10E-07 | 1.27E-01 |
| 448.84756 | 48.94  | 16.63 | 15.41 | 17.70 | 16.98 | 1.89E-31 | 1.72E-12 | 2.85E-10 | 1.31E-01 | 5.11E-15 | 4.11E-14 | 9.22E-05 |
| 448.87071 | 45.2   | 18.08 | 18.15 | 18.58 | 18.62 | 2.85E-09 | 8.76E-01 | 2.39E-06 | 1.01E-06 | 1.28E-04 | 5.36E-05 | 9.85E-01 |
| 448.92295 | 26.65  | 17.00 | 17.24 | 16.92 | 17.38 | 1.16E-02 | 3.66E-01 | 9.40E-01 | 6.34E-02 | 1.41E-01 | 8.13E-01 | 1.63E-02 |
| 448.96032 | 37.16  | 15.16 | 13.90 | 14.70 | 14.58 | 5.07E-05 | 1.07E-05 | 2.69E-01 | 1.25E-01 | 1.38E-02 | 6.17E-02 | 9.71E-01 |
| 448.99584 | 48.83  | 14.76 | 16.87 | 16.87 | 16.22 | 2.36E-15 | 6.30E-13 | 4.33E-13 | 1.21E-06 | 1.00E+00 | 9.80E-02 | 9.55E-02 |
| 449.04775 | 20.61  | 11.92 | 14.59 | 13.29 | 13.16 | 3.31E-08 | 3.19E-09 | 5.09E-03 | 1.85E-02 | 1.13E-02 | 6.27E-03 | 9.92E-01 |
| 449.09833 | 27.73  | 16.24 | 16.30 | 16.46 | 15.52 | 2.36E-08 | 9.77E-01 | 4.40E-01 | 1.77E-05 | 7.19E-01 | 5.41E-06 | 2.50E-08 |
| 449.10955 | 20.92  | 13.18 | 15.98 | 15.60 | 15.34 | 6.93E-17 | 4.46E-14 | 2.76E-12 | 1.51E-09 | 6.41E-01 | 2.22E-01 | 8.60E-01 |
| 449.1953  | 24.23  | 13.92 | 13.39 | 14.41 | 15.83 | 2.20E-05 | 6.67E-01 | 7.22E-01 | 6.50E-04 | 1.47E-01 | 1.09E-05 | 2.35E-02 |
| 449.24909 | 192.19 | 15.05 | 13.17 | 14.08 | 13.34 | 2.76E-05 | 4.88E-05 | 8.65E-02 | 4.23E-04 | 1.33E-01 | 9.79E-01 | 3.14E-01 |
| 449.27631 | 203.15 | 18.64 | 18.25 | 18.84 | 18.61 | 4.71E-02 | 2.15E-01 | 7.77E-01 | 9.98E-01 | 2.64E-02 | 3.43E-01 | 7.07E-01 |
| 449.2769  | 275.99 | 15.13 | 10.92 | 13.13 | 15.72 | 5.33E-14 | 5.70E-11 | 3.79E-03 | 7.56E-01 | 1.49E-03 | 1.65E-12 | 1.97E-04 |
| 449.29172 | 234.81 | 21.05 | 21.67 | 21.49 | 20.73 | 3.28E-03 | 8.57E-02 | 3.22E-01 | 6.30E-01 | 9.10E-01 | 4.25E-03 | 2.91E-02 |
| 449.32259 | 268.08 | 16.80 | 17.95 | 17.72 | 17.42 | 3.76E-05 | 2.80E-05 | 1.19E-03 | 7.07E-02 | 7.85E-01 | 1.68E-01 | 6.48E-01 |
| 449.75153 | 194.52 | 14.46 | 14.63 | 14.12 | 13.18 | 5.20E-04 | 9.61E-01 | 7.44E-01 | 2.09E-03 | 4.62E-01 | 5.30E-04 | 4.97E-02 |
| 449.83541 | 47.17  | 16.96 | 17.51 | 18.47 | 18.18 | 9.84E-37 | 9.59E-07 | 5.11E-15 | 1.09E-14 | 4.35E-14 | 1.40E-08 | 3.78E-02 |
| 449.90797 | 33.54  | 16.39 | 17.36 | 17.14 | 16.79 | 2.56E-16 | 4.34E-14 | 1.97E-10 | 1.86E-03 | 1.77E-01 | 7.44E-06 | 1.41E-02 |
| 449.91812 | 35.56  | 15.21 | 18.00 | 18.14 | 17.37 | 3.15E-47 | 5.11E-15 | 5.11E-15 | 6.00E-15 | 8.35E-01 | 3.21E-03 | 1.25E-04 |
| 449.99358 | 52.07  | 14.95 | 17.72 | 18.40 | 17.24 | 1.89E-35 | 9.33E-15 | 5.11E-15 | 4.37E-14 | 2.54E-02 | 2.14E-01 | 2.42E-05 |
| 450.01048 | 26.2   | 9.93  | 13.02 | 14.60 | 11.55 | 2.85E-27 | 9.46E-14 | 5.33E-15 | 1.81E-04 | 2.38E-04 | 1.21E-03 | 9.21E-13 |
| 450.14048 | 25.78  | 14.78 | 15.57 | 16.24 | 15.60 | 6.83E-08 | 4.41E-03 | 7.85E-09 | 4.06E-03 | 2.68E-02 | 1.00E+00 | 4.36E-02 |
| 450.26327 | 189.18 | 21.82 | 21.46 | 21.44 | 20.82 | 6.46E-11 | 3.05E-02 | 1.49E-02 | 5.28E-12 | 9.96E-01 | 2.08E-05 | 4.39E-05 |
| 450.28669 | 213.86 | 15.95 | 15.05 | 15.47 | 16.31 | 9.11E-06 | 1.36E-03 | 1.89E-01 | 4.80E-01 | 3.19E-01 | 9.37E-06 | 6.07E-03 |
| 450.29619 | 241.02 | 19.05 | 19.56 | 19.34 | 18.58 | 5.59E-03 | 2.33E-01 | 7.01E-01 | 3.24E-01 | 8.52E-01 | 3.68E-03 | 3.75E-02 |
| 450.7828  | 42.79  | 13.60 | 7.54  | 11.28 | 12.39 | 5.18E-31 | 5.11E-15 | 1.16E-06 | 3.75E-02 | 7.93E-14 | 3.69E-14 | 7.20E-02 |
| 450.79048 | 60.43  | 16.36 | 15.55 | 17.65 | 17.18 | 6.39E-37 | 5.58E-08 | 4.27E-14 | 7.96E-08 | 5.11E-15 | 1.62E-14 | 5.02E-03 |
| 450.80727 | 81.16  | 17.43 | 15.42 | 16.80 | 16.73 | 1.69E-24 | 6.66E-15 | 8.04E-04 | 2.67E-04 | 2.00E-13 | 1.01E-11 | 9.77E-01 |
| 450.83065 | 45.03  | 19.60 | 19.98 | 20.81 | 20.63 | 7.99E-36 | 1.14E-04 | 5.11E-15 | 1.22E-14 | 4.44E-14 | 6.37E-11 | 1.71E-01 |
| 450.89933 | 19.44  | 12.20 | 14.32 | 15.14 | 14.56 | 9.25E-27 | 4.62E-14 | 6.22E-15 | 4.22E-14 | 6.47E-03 | 7.89E-01 | 1.09E-01 |
| 450.91968 | 28.3   | 15.22 | 14.66 | 14.32 | 15.15 | 7.55E-04 | 1.02E-01 | 1.24E-03 | 9.91E-01 | 5.01E-01 | 2.38E-01 | 6.90E-03 |
| 450.93382 | 67.91  | 10.38 | 11.24 | 15.02 | 15.10 | 9.72E-31 | 1.65E-01 | 2.00E-14 | 2.58E-14 | 4.47E-14 | 4.60E-14 | 9.98E-01 |
| 450.94336 | 24.29  | 15.33 | 17.35 | 17.65 | 17.21 | 2.82E-15 | 7.64E-11 | 1.09E-13 | 3.29E-09 | 7.19E-01 | 9.68E-01 | 4.45E-01 |
| 451.00648 | 62.61  | 10.84 | 15.91 | 9.15  | 9.51  | 1.71E-83 | 5.11E-15 | 6.00E-12 | 1.61E-07 | 5.11E-15 | 5.11E-15 | 4.31E-01 |
| 451.05029 | 17.88  | 13.55 | 13.85 | 14.06 | 15.43 | 1.32E-04 | 8.92E-01 | 6.03E-01 | 8.23E-05 | 9.58E-01 | 1.87E-03 | 8.89E-03 |
| 451.11761 | 19.52  | 11.73 | 13.95 | 13.27 | 13.05 | 4.18E-07 | 1.30E-07 | 3.98E-04 | 4.93E-03 | 2.98E-01 | 1.18E-01 | 9.49E-01 |
| 451.12748 | 20.91  | 16.58 | 18.55 | 18.49 | 17.93 | 5.62E-16 | 1.35E-13 | 2.89E-13 | 6.13E-07 | 9.96E-01 | 6.84E-02 | 1.10E-01 |
| 451.26518 | 192.64 | 19.53 | 19.18 | 19.21 | 18.53 | 6.26E-09 | 8.18E-02 | 1.26E-01 | 8.74E-10 | 9.97E-01 | 1.63E-04 | 6.03E-05 |
| 451.29232 | 251.53 | 24.32 | 23.03 | 22.86 | 22.92 | 1.72E-25 | 4.44E-14 | 3.29E-14 | 4.25E-14 | 6.37E-01 | 8.74E-01 | 9.79E-01 |
| 451.307   | 254.37 | 21.12 | 21.49 | 21.35 | 20.80 | 1.11E-01 | 5.37E-01 | 8.36E-01 | 6.95E-01 | 9.59E-01 | 9.37E-02 | 2.46E-01 |
| 451.8331  | 56.05  | 14.68 | 14.64 | 15.80 | 15.61 | 7.53E-20 | 9.87E-01 | 8.39E-14 | 1.26E-09 | 6.75E-14 | 5.76E-10 | 5.05E-01 |
| 451.92794 | 54.28  | 17.33 | 18.40 | 18.71 | 18.06 | 4.54E-19 | 2.50E-12 | 4.33E-14 | 3.77E-06 | 1.32E-01 | 9.55E-02 | 7.28E-05 |
| 452.05067 | 20.34  | 16.02 | 18.47 | 18.48 | 18.07 | 5.57E-28 | 1.89E-14 | 1.53E-14 | 4.29E-14 | 1.00E+00 | 2.92E-01 | 2.61E-01 |

|           |        |       |       |       |       |          |          |          |          |          |          |          |
|-----------|--------|-------|-------|-------|-------|----------|----------|----------|----------|----------|----------|----------|
| 452.13916 | 23.05  | 18.10 | 20.04 | 18.85 | 18.56 | 5.31E-16 | 4.22E-14 | 2.17E-03 | 1.45E-01 | 4.81E-07 | 1.15E-09 | 5.51E-01 |
| 452.26737 | 193.73 | 15.47 | 14.09 | 14.23 | 13.79 | 8.11E-07 | 7.62E-05 | 4.20E-04 | 1.78E-06 | 9.70E-01 | 7.98E-01 | 5.28E-01 |
| 452.27896 | 207.49 | 25.09 | 25.60 | 25.60 | 25.14 | 2.77E-07 | 4.03E-05 | 4.09E-05 | 9.70E-01 | 1.00E+00 | 6.43E-04 | 6.70E-04 |
| 452.29527 | 236.6  | 22.17 | 21.57 | 21.60 | 21.27 | 2.43E-08 | 1.27E-04 | 3.00E-04 | 9.58E-09 | 9.95E-01 | 1.86E-01 | 1.08E-01 |
| 452.3102  | 254.48 | 19.18 | 19.44 | 19.24 | 18.89 | 2.93E-01 | 7.58E-01 | 9.95E-01 | 7.31E-01 | 8.85E-01 | 2.16E-01 | 6.01E-01 |
| 452.788   | 52.41  | 13.42 | 12.10 | 15.10 | 14.30 | 8.04E-09 | 2.00E-02 | 1.38E-03 | 2.40E-01 | 3.47E-09 | 4.24E-05 | 3.32E-01 |
| 452.80519 | 86.52  | 14.31 | 12.65 | 13.82 | 13.84 | 2.62E-06 | 7.81E-07 | 3.55E-01 | 4.30E-01 | 1.29E-03 | 1.56E-03 | 1.00E+00 |
| 452.8262  | 55.15  | 16.64 | 15.94 | 17.19 | 17.01 | 3.14E-27 | 1.35E-10 | 3.63E-07 | 1.85E-03 | 5.77E-15 | 4.17E-14 | 3.10E-01 |
| 452.83983 | 49.88  | 15.48 | 12.02 | 13.52 | 14.26 | 2.46E-15 | 4.46E-14 | 2.45E-06 | 1.11E-02 | 8.70E-04 | 3.78E-07 | 2.36E-01 |
| 452.87804 | 37.79  | 14.87 | 16.10 | 15.43 | 14.42 | 2.47E-05 | 1.62E-03 | 3.27E-01 | 5.51E-01 | 2.05E-01 | 1.91E-05 | 2.10E-02 |
| 452.90284 | 36.73  | 17.64 | 18.95 | 18.61 | 18.79 | 2.56E-12 | 1.96E-11 | 6.27E-07 | 8.75E-09 | 2.35E-01 | 8.31E-01 | 7.57E-01 |
| 452.92363 | 41.85  | 17.76 | 20.57 | 20.42 | 20.43 | 2.33E-23 | 4.35E-14 | 4.33E-14 | 4.26E-14 | 9.48E-01 | 9.67E-01 | 1.00E+00 |
| 452.94981 | 57.86  | 13.19 | 12.49 | 15.01 | 15.31 | 8.52E-20 | 9.32E-02 | 2.81E-08 | 3.83E-10 | 1.55E-13 | 4.46E-14 | 7.70E-01 |
| 452.98397 | 35.06  | 11.09 | 13.87 | 14.98 | 13.04 | 6.11E-11 | 2.46E-06 | 1.86E-11 | 2.40E-03 | 1.71E-01 | 4.58E-01 | 3.29E-03 |
| 453.00689 | 68.02  | 16.95 | 18.70 | 16.35 | 16.47 | 1.13E-88 | 5.11E-15 | 1.18E-13 | 3.84E-09 | 5.11E-15 | 5.11E-15 | 4.40E-01 |
| 453.07481 | 23.71  | 17.76 | 18.07 | 17.73 | 17.47 | 1.42E-01 | 5.63E-01 | 9.99E-01 | 6.54E-01 | 5.00E-01 | 8.80E-02 | 7.42E-01 |
| 453.14251 | 23.09  | 14.41 | 16.07 | 14.00 | 14.34 | 1.13E-07 | 2.87E-05 | 6.31E-01 | 9.97E-01 | 1.75E-07 | 3.55E-05 | 7.87E-01 |
| 453.16658 | 203.42 | 12.12 | 12.68 | 14.48 | 14.51 | 6.78E-16 | 2.92E-01 | 5.24E-12 | 1.46E-11 | 3.08E-07 | 4.91E-07 | 1.00E+00 |
| 453.2852  | 222.88 | 22.98 | 23.44 | 23.35 | 22.94 | 5.11E-05 | 1.39E-03 | 1.18E-02 | 9.91E-01 | 9.16E-01 | 9.84E-04 | 7.96E-03 |
| 453.29738 | 263.6  | 17.25 | 17.24 | 17.51 | 17.48 | 4.73E-01 | 1.00E+00 | 6.29E-01 | 7.17E-01 | 6.27E-01 | 7.12E-01 | 1.00E+00 |
| 453.91666 | 31.68  | 12.92 | 13.16 | 14.03 | 13.27 | 1.08E-02 | 8.92E-01 | 6.55E-03 | 7.51E-01 | 6.46E-02 | 9.91E-01 | 1.47E-01 |
| 453.92728 | 45.2   | 13.35 | 15.89 | 15.33 | 16.08 | 1.74E-16 | 4.35E-13 | 8.80E-09 | 7.44E-14 | 3.15E-01 | 9.36E-01 | 1.08E-01 |
| 453.94662 | 62.47  | 13.84 | 14.54 | 16.84 | 16.33 | 1.77E-24 | 6.56E-02 | 3.24E-14 | 5.06E-14 | 3.67E-13 | 3.55E-08 | 3.07E-01 |
| 454.00936 | 33.35  | 14.15 | 18.29 | 18.43 | 17.03 | 5.65E-58 | 5.11E-15 | 5.11E-15 | 5.11E-15 | 9.13E-01 | 3.00E-07 | 7.86E-09 |
| 454.05004 | 32.9   | 16.27 | 16.53 | 17.04 | 16.24 | 5.69E-02 | 8.41E-01 | 7.30E-02 | 1.00E+00 | 4.06E-01 | 8.17E-01 | 7.97E-02 |
| 454.07482 | 22.33  | 14.64 | 17.44 | 17.25 | 16.68 | 2.21E-35 | 5.11E-15 | 5.11E-15 | 4.29E-14 | 7.92E-01 | 2.25E-03 | 3.48E-02 |
| 454.2365  | 185.54 | 11.98 | 10.32 | 10.85 | 14.15 | 7.57E-40 | 2.73E-11 | 5.27E-06 | 4.24E-14 | 1.10E-01 | 5.11E-15 | 5.11E-15 |
| 454.29139 | 288.58 | 16.16 | 16.66 | 16.79 | 16.81 | 2.01E-03 | 4.08E-02 | 5.15E-03 | 5.28E-03 | 9.18E-01 | 8.86E-01 | 1.00E+00 |
| 454.31824 | 252.66 | 16.90 | 16.08 | 16.22 | 16.07 | 4.20E-03 | 1.02E-02 | 4.49E-02 | 1.08E-02 | 9.52E-01 | 1.00E+00 | 9.40E-01 |
| 454.77778 | 53.53  | 14.90 | 11.29 | 14.07 | 14.27 | 1.91E-48 | 5.11E-15 | 1.02E-04 | 8.74E-03 | 5.11E-15 | 5.11E-15 | 7.32E-01 |
| 454.78875 | 50.55  | 13.81 | 13.79 | 14.98 | 15.21 | 3.95E-05 | 1.00E+00 | 6.61E-03 | 1.04E-03 | 7.45E-03 | 1.24E-03 | 9.22E-01 |
| 454.79786 | 44.15  | 19.14 | 18.37 | 19.48 | 19.69 | 2.98E-25 | 1.10E-10 | 7.21E-03 | 7.26E-06 | 4.15E-14 | 1.29E-14 | 2.69E-01 |
| 454.81758 | 91.8   | 14.32 | 12.77 | 15.05 | 14.25 | 1.31E-14 | 2.33E-08 | 2.25E-02 | 9.94E-01 | 4.57E-14 | 4.61E-07 | 1.65E-02 |
| 454.83993 | 75.07  | 18.04 | 16.12 | 17.13 | 16.86 | 7.33E-29 | 5.11E-15 | 3.60E-09 | 2.23E-13 | 1.33E-10 | 7.24E-06 | 2.53E-01 |
| 454.86089 | 38.3   | 21.44 | 22.86 | 22.64 | 22.58 | 8.54E-26 | 1.55E-14 | 4.33E-14 | 4.40E-14 | 2.94E-01 | 1.39E-01 | 9.69E-01 |
| 454.9008  | 43.53  | 14.89 | 10.90 | 11.28 | 11.86 | 6.78E-22 | 4.33E-14 | 4.15E-14 | 6.38E-12 | 7.73E-01 | 9.60E-02 | 4.96E-01 |
| 454.91834 | 42.04  | 17.63 | 19.12 | 18.94 | 19.06 | 6.43E-21 | 4.46E-14 | 6.82E-14 | 4.24E-14 | 6.73E-01 | 9.80E-01 | 8.95E-01 |
| 454.97748 | 19.4   | 13.86 | 14.67 | 14.64 | 15.67 | 1.32E-03 | 2.37E-01 | 2.61E-01 | 3.51E-04 | 1.00E+00 | 1.29E-01 | 1.07E-01 |
| 455.00345 | 44.65  | 12.11 | 13.96 | 12.57 | 11.34 | 7.68E-15 | 2.71E-09 | 3.62E-01 | 4.11E-02 | 1.64E-05 | 4.69E-14 | 2.66E-04 |
| 455.02284 | 60.61  | 12.34 | 20.16 | 9.88  | 11.41 | 1.11E-93 | 5.11E-15 | 5.93E-14 | 1.17E-02 | 5.11E-15 | 5.11E-15 | 5.91E-06 |
| 455.07312 | 25.56  | 12.57 | 13.12 | 13.08 | 12.25 | 1.01E-02 | 2.26E-01 | 2.69E-01 | 6.85E-01 | 9.99E-01 | 2.19E-02 | 2.79E-02 |
| 455.20342 | 96.07  | 15.29 | 10.76 | 13.52 | 14.65 | 3.05E-25 | 8.66E-15 | 2.85E-05 | 3.59E-01 | 1.06E-10 | 4.29E-14 | 2.59E-02 |
| 455.24203 | 104.79 | 16.15 | 13.44 | 14.50 | 14.19 | 8.24E-11 | 2.99E-11 | 7.10E-05 | 3.59E-06 | 2.73E-02 | 2.20E-01 | 8.54E-01 |
| 455.26832 | 170.19 | 15.19 | 13.53 | 13.11 | 14.72 | 3.77E-09 | 1.66E-05 | 3.02E-08 | 5.42E-01 | 6.30E-01 | 7.01E-03 | 7.84E-05 |
| 455.28432 | 291.8  | 13.19 | 12.99 | 14.53 | 15.13 | 1.05E-06 | 9.65E-01 | 8.37E-03 | 6.79E-05 | 2.41E-03 | 1.62E-05 | 5.21E-01 |

|           |        |       |       |       |       |           |          |          |          |          |          |          |
|-----------|--------|-------|-------|-------|-------|-----------|----------|----------|----------|----------|----------|----------|
| 455.28712 | 211.47 | 16.69 | 17.00 | 16.94 | 16.54 | 2.06E-02  | 1.94E-01 | 3.79E-01 | 8.04E-01 | 9.79E-01 | 3.11E-02 | 7.97E-02 |
| 455.31774 | 85.64  | 14.18 | 11.77 | 11.50 | 11.84 | 6.22E-04  | 5.31E-03 | 1.28E-03 | 9.46E-03 | 9.83E-01 | 1.00E+00 | 9.70E-01 |
| 455.86433 | 44.72  | 17.23 | 18.80 | 18.65 | 18.51 | 2.07E-41  | 5.11E-15 | 5.11E-15 | 5.77E-15 | 4.35E-01 | 3.02E-02 | 5.45E-01 |
| 455.91579 | 33.54  | 12.86 | 15.55 | 15.43 | 15.00 | 3.16E-29  | 7.55E-15 | 1.35E-14 | 4.34E-14 | 9.47E-01 | 8.88E-02 | 2.57E-01 |
| 456.02585 | 64.51  | 11.38 | 16.53 | 9.42  | 9.86  | 4.69E-103 | 5.11E-15 | 3.49E-14 | 4.74E-13 | 5.11E-15 | 5.11E-15 | 1.04E-01 |
| 456.24124 | 172.69 | 14.93 | 13.73 | 13.87 | 13.75 | 3.59E-05  | 2.06E-04 | 1.17E-03 | 4.16E-04 | 9.65E-01 | 1.00E+00 | 9.79E-01 |
| 456.29722 | 167.17 | 15.57 | 17.15 | 16.83 | 16.37 | 2.98E-15  | 5.13E-14 | 1.95E-10 | 1.70E-04 | 3.37E-01 | 4.33E-04 | 7.42E-02 |
| 456.33375 | 272.28 | 18.63 | 17.83 | 17.88 | 17.83 | 1.19E-06  | 1.80E-05 | 6.93E-05 | 3.71E-05 | 9.86E-01 | 1.00E+00 | 9.91E-01 |
| 456.77685 | 89.43  | 14.96 | 15.04 | 15.05 | 14.99 | 9.34E-01  | 9.50E-01 | 9.40E-01 | 9.96E-01 | 1.00E+00 | 9.91E-01 | 9.88E-01 |
| 456.79776 | 50.46  | 20.28 | 19.41 | 20.09 | 19.99 | 5.04E-05  | 2.28E-05 | 7.28E-01 | 4.19E-01 | 1.93E-03 | 1.58E-02 | 9.54E-01 |
| 456.81866 | 85.04  | 14.70 | 12.93 | 13.91 | 13.47 | 2.82E-15  | 4.32E-14 | 4.17E-04 | 3.16E-08 | 1.40E-05 | 5.18E-02 | 1.46E-01 |
| 456.83711 | 79.87  | 14.74 | 11.58 | 12.39 | 12.74 | 8.40E-22  | 2.86E-14 | 1.52E-13 | 6.70E-10 | 3.27E-02 | 1.14E-03 | 6.69E-01 |
| 456.85738 | 51.82  | 18.89 | 19.82 | 19.64 | 19.64 | 5.28E-15  | 1.02E-13 | 7.23E-10 | 2.21E-09 | 3.90E-01 | 4.41E-01 | 1.00E+00 |
| 456.87652 | 44.54  | 20.78 | 22.51 | 22.35 | 22.23 | 6.13E-48  | 5.11E-15 | 5.11E-15 | 5.11E-15 | 4.16E-01 | 4.13E-02 | 6.38E-01 |
| 456.91352 | 41.51  | 15.39 | 16.30 | 16.63 | 16.79 | 3.86E-10  | 1.25E-04 | 6.03E-08 | 2.86E-09 | 4.24E-01 | 1.20E-01 | 8.75E-01 |
| 457.02077 | 65.26  | 11.53 | 16.49 | 9.82  | 10.49 | 2.58E-115 | 5.11E-15 | 1.22E-14 | 4.92E-10 | 5.11E-15 | 5.11E-15 | 1.36E-04 |
| 457.23668 | 135.92 | 15.49 | 13.44 | 14.30 | 13.01 | 1.52E-06  | 8.78E-05 | 4.92E-02 | 2.41E-06 | 2.67E-01 | 8.13E-01 | 4.07E-02 |
| 457.28141 | 166.62 | 13.84 | 10.36 | 10.80 | 12.05 | 1.67E-16  | 4.66E-14 | 2.38E-12 | 1.04E-04 | 6.83E-01 | 3.94E-04 | 1.53E-02 |
| 457.29972 | 174.35 | 11.92 | 14.56 | 13.74 | 13.09 | 1.19E-09  | 3.78E-10 | 2.03E-05 | 1.72E-02 | 1.52E-01 | 2.01E-03 | 3.82E-01 |
| 457.31793 | 245.21 | 16.93 | 16.89 | 17.31 | 17.30 | 5.01E-02  | 9.95E-01 | 2.01E-01 | 2.45E-01 | 1.38E-01 | 1.72E-01 | 1.00E+00 |
| 457.33342 | 159.01 | 14.88 | 10.33 | 11.33 | 10.69 | 1.99E-13  | 5.90E-12 | 5.73E-08 | 5.58E-10 | 3.63E-01 | 9.44E-01 | 7.34E-01 |
| 457.80155 | 74.2   | 15.24 | 13.42 | 15.18 | 14.85 | 1.86E-22  | 4.07E-14 | 9.87E-01 | 1.42E-01 | 4.32E-14 | 1.77E-12 | 2.83E-01 |
| 457.86194 | 50.61  | 10.75 | 14.06 | 13.20 | 12.86 | 4.01E-10  | 2.24E-10 | 2.52E-06 | 1.36E-04 | 2.94E-01 | 8.05E-02 | 8.98E-01 |
| 457.88007 | 45.1   | 16.14 | 18.36 | 18.20 | 18.08 | 2.32E-39  | 5.11E-15 | 5.11E-15 | 5.33E-15 | 7.25E-01 | 2.79E-01 | 8.57E-01 |
| 458.25624 | 178.65 | 13.83 | 12.49 | 12.76 | 12.80 | 1.17E-05  | 1.41E-05 | 7.17E-04 | 1.98E-03 | 7.74E-01 | 7.14E-01 | 9.99E-01 |
| 458.26841 | 196.12 | 15.04 | 13.87 | 14.68 | 14.54 | 1.69E-09  | 2.44E-10 | 1.27E-01 | 2.30E-02 | 2.98E-05 | 1.09E-03 | 8.82E-01 |
| 458.31304 | 186.55 | 18.06 | 19.86 | 18.96 | 18.38 | 4.78E-18  | 4.24E-14 | 1.47E-05 | 3.40E-01 | 1.84E-05 | 7.12E-12 | 1.89E-02 |
| 458.3493  | 201.21 | 13.13 | 16.93 | 16.98 | 15.53 | 7.38E-19  | 4.42E-14 | 4.34E-14 | 6.14E-07 | 9.99E-01 | 1.12E-02 | 7.24E-03 |
| 458.34938 | 297.03 | 12.90 | 13.36 | 14.25 | 14.24 | 1.53E-03  | 6.65E-01 | 4.82E-03 | 7.14E-03 | 1.38E-01 | 1.61E-01 | 1.00E+00 |
| 458.73573 | 84.91  | 16.25 | 17.69 | 17.77 | 17.33 | 6.27E-22  | 4.36E-14 | 4.15E-14 | 2.22E-10 | 9.53E-01 | 1.06E-01 | 2.73E-02 |
| 458.75663 | 93.89  | 13.19 | 13.11 | 13.61 | 13.05 | 3.90E-02  | 9.79E-01 | 1.62E-01 | 9.19E-01 | 7.83E-02 | 9.95E-01 | 4.86E-02 |
| 458.79615 | 67.79  | 18.61 | 17.67 | 18.85 | 18.48 | 2.65E-27  | 4.16E-14 | 4.46E-02 | 5.01E-01 | 5.33E-15 | 1.11E-13 | 8.37E-04 |
| 458.81397 | 63.11  | 20.97 | 20.91 | 21.57 | 21.31 | 2.67E-16  | 8.73E-01 | 1.33E-12 | 1.45E-04 | 9.61E-14 | 1.06E-05 | 9.02E-03 |
| 458.85143 | 52.96  | 14.89 | 10.47 | 13.79 | 13.40 | 2.12E-14  | 5.04E-14 | 1.30E-01 | 2.43E-02 | 6.43E-09 | 8.34E-07 | 8.86E-01 |
| 458.87281 | 38.47  | 18.60 | 20.41 | 20.41 | 20.36 | 4.93E-51  | 5.11E-15 | 5.11E-15 | 5.11E-15 | 1.00E+00 | 9.84E-01 | 9.74E-01 |
| 458.88958 | 32.26  | 15.79 | 17.04 | 17.19 | 16.87 | 1.88E-09  | 4.41E-07 | 9.90E-09 | 2.71E-05 | 9.15E-01 | 8.94E-01 | 5.32E-01 |
| 458.93635 | 22.11  | 16.91 | 17.75 | 18.09 | 17.57 | 2.50E-06  | 9.17E-04 | 8.25E-07 | 1.89E-02 | 4.26E-01 | 8.63E-01 | 1.08E-01 |
| 458.94969 | 20.85  | 15.54 | 17.70 | 17.78 | 17.74 | 2.89E-38  | 5.11E-15 | 5.11E-15 | 5.11E-15 | 9.55E-01 | 9.93E-01 | 9.96E-01 |
| 459.05619 | 58.15  | 12.90 | 16.64 | 11.17 | 11.48 | 3.87E-94  | 5.11E-15 | 2.64E-14 | 4.46E-14 | 5.11E-15 | 5.11E-15 | 2.45E-01 |
| 459.07723 | 53.4   | 14.69 | 17.83 | 13.31 | 13.75 | 2.02E-138 | 5.11E-15 | 5.11E-15 | 7.77E-15 | 5.11E-15 | 5.11E-15 | 6.95E-07 |
| 459.20325 | 183.67 | 14.50 | 13.67 | 13.55 | 13.24 | 1.35E-03  | 5.33E-02 | 1.76E-02 | 9.84E-04 | 9.83E-01 | 5.72E-01 | 7.83E-01 |
| 459.26163 | 176.75 | 14.44 | 11.34 | 11.69 | 12.44 | 4.68E-18  | 4.22E-14 | 1.19E-13 | 1.35E-07 | 7.40E-01 | 1.12E-02 | 1.42E-01 |
| 459.29589 | 192.25 | 15.75 | 15.01 | 14.81 | 14.38 | 6.46E-03  | 2.21E-01 | 6.63E-02 | 3.50E-03 | 9.54E-01 | 4.10E-01 | 7.16E-01 |
| 459.31595 | 185.64 | 15.95 | 17.77 | 16.78 | 16.11 | 4.36E-16  | 4.55E-14 | 5.12E-04 | 8.92E-01 | 2.67E-05 | 4.87E-12 | 1.23E-02 |
| 459.81746 | 54.61  | 16.13 | 13.87 | 16.49 | 16.10 | 1.76E-44  | 5.11E-15 | 7.98E-02 | 9.97E-01 | 5.11E-15 | 5.11E-15 | 6.78E-02 |

|           |        |       |       |       |       |           |          |          |          |          |          |          |
|-----------|--------|-------|-------|-------|-------|-----------|----------|----------|----------|----------|----------|----------|
| 459.87901 | 38.32  | 13.24 | 14.79 | 14.89 | 15.17 | 4.28E-26  | 4.43E-14 | 4.33E-14 | 1.89E-14 | 9.38E-01 | 1.33E-01 | 3.64E-01 |
| 459.9542  | 30.41  | 13.04 | 14.76 | 15.79 | 12.46 | 1.08E-22  | 4.90E-07 | 4.34E-14 | 2.64E-01 | 7.12E-03 | 1.48E-10 | 4.13E-14 |
| 460.0194  | 18.23  | 15.25 | 17.90 | 17.34 | 16.21 | 1.30E-14  | 1.18E-13 | 1.96E-09 | 1.89E-02 | 3.15E-01 | 7.27E-06 | 5.15E-03 |
| 460.0291  | 18.48  | 13.55 | 18.20 | 17.71 | 16.59 | 6.26E-28  | 6.88E-15 | 2.91E-14 | 2.55E-12 | 6.00E-01 | 5.23E-04 | 2.76E-02 |
| 460.28407 | 204.31 | 19.96 | 20.42 | 20.58 | 20.25 | 8.25E-05  | 4.42E-03 | 4.39E-05 | 1.73E-01 | 6.75E-01 | 6.09E-01 | 9.31E-02 |
| 460.32869 | 211.73 | 18.99 | 20.80 | 19.45 | 18.99 | 2.73E-18  | 4.33E-14 | 9.64E-02 | 1.00E+00 | 9.89E-10 | 4.92E-14 | 1.22E-01 |
| 460.7339  | 75.24  | 14.34 | 15.43 | 15.67 | 14.84 | 3.32E-10  | 9.21E-07 | 9.40E-10 | 7.15E-02 | 6.23E-01 | 3.16E-02 | 5.81E-04 |
| 460.75148 | 66.59  | 16.46 | 17.22 | 17.85 | 17.44 | 5.55E-12  | 1.73E-04 | 1.30E-12 | 1.49E-06 | 4.16E-03 | 6.68E-01 | 1.29E-01 |
| 460.79341 | 78.41  | 14.12 | 12.51 | 13.44 | 13.10 | 3.04E-06  | 7.62E-07 | 9.52E-02 | 4.75E-03 | 1.19E-02 | 2.35E-01 | 6.83E-01 |
| 460.809   | 43.51  | 18.85 | 18.10 | 19.42 | 19.32 | 1.79E-22  | 2.05E-08 | 2.52E-05 | 1.25E-03 | 3.82E-14 | 4.14E-14 | 8.63E-01 |
| 460.86619 | 38.58  | 16.49 | 17.67 | 17.61 | 17.37 | 2.34E-16  | 7.64E-14 | 3.49E-13 | 2.35E-08 | 9.75E-01 | 1.91E-01 | 3.76E-01 |
| 460.86848 | 153.36 | 14.96 | 10.75 | 9.14  | 12.69 | 4.98E-33  | 4.17E-14 | 5.11E-15 | 9.96E-07 | 8.67E-04 | 6.84E-05 | 1.15E-13 |
| 460.88956 | 46.16  | 18.50 | 17.87 | 18.01 | 18.35 | 7.42E-03  | 9.28E-03 | 6.98E-02 | 8.81E-01 | 8.87E-01 | 1.04E-01 | 3.81E-01 |
| 460.90976 | 47.21  | 17.27 | 18.11 | 18.47 | 18.34 | 1.12E-13  | 7.49E-07 | 8.91E-13 | 6.16E-10 | 1.00E-01 | 4.85E-01 | 8.50E-01 |
| 460.94028 | 31.33  | 12.56 | 14.07 | 14.26 | 13.53 | 1.34E-09  | 2.71E-07 | 4.10E-09 | 2.53E-03 | 8.92E-01 | 2.28E-01 | 4.63E-02 |
| 460.98172 | 22     | 12.90 | 13.31 | 13.85 | 14.32 | 6.76E-03  | 7.52E-01 | 9.83E-02 | 5.13E-03 | 5.83E-01 | 9.64E-02 | 6.89E-01 |
| 461.02862 | 47.5   | 14.09 | 10.98 | 15.12 | 14.18 | 2.73E-23  | 5.06E-14 | 2.16E-02 | 9.95E-01 | 1.95E-14 | 7.08E-14 | 6.12E-02 |
| 461.03576 | 58.76  | 10.20 | 22.97 | 10.73 | 10.18 | 3.59E-84  | 5.11E-15 | 6.35E-01 | 1.00E+00 | 5.11E-15 | 5.11E-15 | 6.52E-01 |
| 461.24971 | 281.17 | 15.48 | 18.68 | 18.20 | 18.35 | 8.33E-12  | 2.10E-10 | 4.95E-08 | 2.94E-08 | 7.40E-01 | 9.02E-01 | 9.91E-01 |
| 461.2709  | 178.73 | 16.05 | 17.64 | 18.01 | 17.78 | 1.66E-12  | 7.10E-08 | 2.03E-11 | 1.13E-08 | 5.32E-01 | 9.63E-01 | 8.40E-01 |
| 461.29031 | 226.23 | 22.81 | 22.50 | 22.73 | 22.40 | 2.90E-01  | 5.39E-01 | 9.87E-01 | 3.27E-01 | 7.57E-01 | 9.81E-01 | 5.32E-01 |
| 461.32996 | 213.38 | 17.08 | 18.80 | 17.63 | 17.40 | 1.43E-11  | 8.23E-12 | 7.66E-02 | 5.21E-01 | 6.24E-06 | 1.37E-07 | 7.79E-01 |
| 461.75147 | 285.59 | 14.19 | 17.31 | 16.44 | 16.78 | 2.11E-09  | 4.36E-09 | 2.69E-05 | 2.41E-06 | 3.01E-01 | 7.35E-01 | 9.07E-01 |
| 461.75152 | 194.81 | 18.26 | 17.76 | 18.09 | 17.12 | 2.97E-08  | 3.22E-02 | 7.79E-01 | 2.36E-08 | 2.87E-01 | 5.11E-03 | 3.97E-06 |
| 461.88386 | 37.6   | 13.59 | 13.52 | 13.65 | 13.50 | 9.82E-01  | 9.98E-01 | 9.99E-01 | 9.95E-01 | 9.89E-01 | 1.00E+00 | 9.82E-01 |
| 461.90333 | 23.23  | 13.14 | 13.83 | 13.45 | 14.70 | 2.43E-02  | 5.19E-01 | 9.25E-01 | 1.55E-02 | 8.80E-01 | 3.67E-01 | 8.77E-02 |
| 462.03917 | 53.42  | 15.58 | 20.03 | 14.69 | 14.94 | 6.86E-172 | 5.11E-15 | 5.11E-15 | 4.17E-14 | 5.11E-15 | 5.11E-15 | 1.79E-03 |
| 462.25587 | 197    | 16.94 | 15.95 | 16.48 | 14.82 | 8.01E-10  | 5.82E-03 | 4.22E-01 | 3.31E-10 | 2.92E-01 | 2.50E-03 | 1.53E-06 |
| 462.29907 | 238.84 | 22.91 | 22.30 | 22.05 | 22.17 | 5.03E-09  | 1.09E-04 | 9.13E-09 | 2.73E-06 | 2.60E-01 | 8.01E-01 | 8.18E-01 |
| 462.74516 | 71.18  | 15.32 | 14.08 | 15.22 | 15.52 | 4.95E-14  | 8.09E-11 | 9.29E-01 | 6.97E-01 | 5.40E-09 | 1.29E-12 | 3.55E-01 |
| 462.75908 | 197.52 | 16.40 | 15.43 | 15.60 | 14.39 | 4.60E-07  | 1.84E-02 | 6.93E-02 | 5.81E-08 | 9.59E-01 | 1.55E-02 | 2.92E-03 |
| 462.78196 | 86.05  | 12.15 | 12.84 | 14.01 | 13.54 | 4.35E-09  | 8.67E-02 | 3.80E-09 | 3.19E-05 | 5.82E-04 | 1.03E-01 | 4.09E-01 |
| 462.80617 | 49.08  | 16.14 | 15.00 | 16.04 | 14.51 | 5.69E-14  | 1.71E-06 | 9.63E-01 | 1.78E-11 | 2.45E-05 | 1.34E-01 | 5.90E-10 |
| 462.82661 | 147.71 | 16.78 | 14.60 | 15.28 | 15.94 | 8.59E-26  | 6.00E-15 | 5.93E-14 | 3.61E-05 | 1.43E-03 | 1.03E-10 | 2.84E-03 |
| 462.84782 | 54.6   | 19.83 | 19.54 | 20.46 | 20.37 | 5.76E-26  | 2.52E-03 | 1.66E-12 | 3.13E-09 | 2.66E-14 | 4.20E-14 | 7.53E-01 |
| 462.88479 | 146.73 | 14.92 | 7.82  | 8.38  | 11.89 | 8.97E-32  | 5.11E-15 | 7.77E-15 | 1.39E-06 | 7.54E-01 | 2.07E-10 | 3.31E-08 |
| 462.88622 | 54.55  | 15.79 | 12.98 | 13.75 | 14.71 | 4.97E-11  | 4.30E-11 | 1.50E-06 | 3.52E-02 | 2.17E-01 | 2.06E-04 | 8.56E-02 |
| 462.9456  | 56.38  | 15.00 | 14.46 | 14.93 | 15.23 | 5.92E-02  | 2.03E-01 | 9.95E-01 | 8.34E-01 | 3.30E-01 | 3.88E-02 | 7.16E-01 |
| 462.96596 | 74.11  | 12.67 | 13.61 | 14.24 | 14.78 | 7.32E-10  | 1.18E-02 | 2.58E-06 | 6.86E-10 | 1.82E-01 | 1.83E-03 | 3.22E-01 |
| 463.03431 | 59.01  | 13.28 | 19.86 | 11.00 | 12.30 | 2.54E-94  | 5.11E-15 | 4.22E-14 | 9.45E-04 | 5.11E-15 | 5.11E-15 | 7.31E-06 |
| 463.06211 | 22.67  | 14.81 | 11.28 | 11.41 | 12.23 | 2.28E-23  | 4.07E-14 | 4.21E-14 | 1.52E-11 | 9.82E-01 | 4.22E-02 | 9.83E-02 |
| 463.15132 | 71.07  | 15.06 | 12.57 | 15.70 | 16.50 | 1.29E-24  | 2.03E-12 | 1.88E-01 | 1.10E-04 | 4.37E-14 | 1.27E-14 | 8.23E-02 |
| 463.16179 | 127.93 | 12.00 | 11.27 | 12.78 | 12.43 | 9.80E-04  | 1.97E-01 | 1.57E-01 | 6.83E-01 | 5.37E-04 | 1.77E-02 | 8.07E-01 |
| 463.20823 | 223.12 | 12.89 | 12.77 | 14.28 | 15.36 | 1.26E-12  | 9.87E-01 | 4.51E-04 | 3.08E-10 | 1.93E-04 | 1.44E-10 | 1.75E-02 |
| 463.22574 | 175.26 | 15.47 | 12.19 | 13.40 | 14.19 | 7.89E-23  | 1.44E-14 | 2.38E-11 | 1.05E-04 | 2.68E-04 | 1.35E-09 | 4.21E-02 |

|           |        |       |       |       |       |           |          |          |          |          |          |          |
|-----------|--------|-------|-------|-------|-------|-----------|----------|----------|----------|----------|----------|----------|
| 463.28732 | 192.09 | 20.19 | 20.42 | 20.61 | 20.62 | 2.47E-02  | 4.51E-01 | 3.88E-02 | 4.16E-02 | 6.56E-01 | 6.38E-01 | 1.00E+00 |
| 463.30573 | 232.88 | 21.99 | 21.44 | 21.25 | 20.97 | 1.17E-08  | 3.17E-03 | 1.82E-05 | 6.32E-09 | 6.13E-01 | 2.21E-02 | 3.16E-01 |
| 463.8508  | 55.73  | 15.41 | 14.10 | 15.51 | 15.40 | 3.31E-20  | 4.33E-14 | 8.88E-01 | 1.00E+00 | 4.19E-14 | 7.58E-14 | 8.68E-01 |
| 463.94508 | 32.12  | 15.53 | 17.08 | 17.17 | 16.41 | 2.74E-10  | 2.85E-08 | 2.83E-09 | 4.73E-03 | 9.85E-01 | 6.36E-02 | 2.38E-02 |
| 463.96843 | 37.33  | 12.48 | 12.07 | 10.64 | 15.03 | 3.50E-38  | 3.78E-01 | 2.51E-11 | 4.31E-14 | 4.90E-07 | 2.69E-14 | 5.11E-15 |
| 463.97858 | 95.45  | 14.53 | 17.35 | 17.44 | 16.95 | 7.03E-21  | 4.26E-14 | 4.35E-14 | 2.26E-12 | 9.91E-01 | 6.08E-01 | 4.24E-01 |
| 464.00154 | 17.99  | 14.85 | 19.74 | 19.73 | 19.15 | 2.48E-55  | 5.11E-15 | 5.11E-15 | 5.11E-15 | 1.00E+00 | 1.44E-01 | 1.43E-01 |
| 464.02823 | 20.39  | 13.20 | 11.93 | 12.38 | 14.76 | 3.04E-06  | 6.94E-02 | 3.81E-01 | 1.83E-02 | 8.27E-01 | 2.69E-06 | 9.52E-05 |
| 464.03721 | 62.44  | 12.99 | 16.07 | 10.94 | 11.73 | 1.75E-106 | 5.11E-15 | 5.11E-15 | 4.20E-14 | 5.11E-15 | 5.11E-15 | 1.67E-08 |
| 464.27764 | 187.45 | 16.76 | 17.85 | 18.25 | 17.28 | 6.32E-10  | 1.06E-05 | 6.37E-10 | 1.09E-01 | 2.88E-01 | 7.12E-02 | 2.24E-04 |
| 464.29011 | 195.37 | 18.41 | 18.48 | 18.83 | 18.71 | 4.70E-02  | 9.70E-01 | 5.27E-02 | 2.90E-01 | 1.72E-01 | 5.66E-01 | 8.99E-01 |
| 464.31286 | 242.17 | 20.77 | 19.05 | 18.84 | 18.22 | 1.63E-20  | 8.00E-11 | 2.88E-13 | 3.99E-14 | 8.28E-01 | 6.98E-03 | 7.00E-02 |
| 464.74043 | 81.78  | 14.87 | 13.72 | 14.99 | 15.16 | 1.80E-09  | 2.29E-06 | 9.41E-01 | 5.80E-01 | 2.49E-07 | 1.63E-08 | 8.93E-01 |
| 464.76132 | 72.24  | 16.35 | 15.59 | 16.34 | 16.40 | 1.03E-12  | 4.43E-10 | 1.00E+00 | 9.68E-01 | 1.22E-09 | 2.66E-10 | 9.62E-01 |
| 464.80595 | 53.47  | 19.82 | 20.10 | 21.09 | 20.89 | 2.14E-23  | 1.04E-01 | 3.99E-14 | 7.16E-14 | 1.14E-12 | 3.94E-08 | 4.00E-01 |
| 464.82315 | 49.27  | 17.35 | 16.15 | 17.99 | 17.48 | 5.55E-47  | 5.33E-15 | 3.71E-10 | 5.22E-01 | 5.11E-15 | 5.11E-15 | 3.07E-06 |
| 464.83426 | 32.25  | 13.59 | 14.66 | 15.75 | 13.78 | 2.78E-16  | 1.44E-04 | 4.69E-14 | 8.72E-01 | 1.49E-04 | 5.29E-03 | 6.12E-12 |
| 464.84272 | 137.61 | 15.88 | 14.73 | 14.65 | 15.13 | 2.11E-10  | 2.28E-08 | 1.78E-09 | 6.94E-04 | 9.79E-01 | 1.86E-01 | 7.74E-02 |
| 464.89806 | 29.75  | 16.69 | 15.02 | 14.52 | 15.98 | 9.71E-09  | 2.43E-05 | 1.78E-08 | 2.15E-01 | 5.16E-01 | 4.96E-02 | 5.93E-04 |
| 464.92659 | 27.75  | 12.60 | 13.68 | 13.96 | 14.22 | 9.70E-09  | 2.46E-04 | 1.65E-06 | 2.91E-08 | 7.18E-01 | 2.04E-01 | 7.75E-01 |
| 464.97009 | 55.01  | 13.31 | 15.36 | 16.67 | 16.20 | 5.34E-21  | 9.89E-09 | 4.03E-14 | 5.02E-14 | 7.10E-04 | 7.62E-02 | 5.18E-01 |
| 465.00646 | 21.6   | 11.98 | 14.83 | 14.44 | 14.21 | 1.06E-24  | 2.31E-14 | 4.15E-14 | 6.28E-14 | 4.40E-01 | 1.00E-01 | 8.24E-01 |
| 465.03125 | 23.42  | 14.84 | 17.27 | 17.13 | 16.34 | 1.53E-14  | 7.12E-13 | 7.43E-12 | 1.92E-05 | 9.70E-01 | 2.34E-02 | 7.05E-02 |
| 465.28534 | 187.15 | 15.87 | 15.72 | 15.59 | 15.70 | 8.81E-01  | 9.73E-01 | 8.46E-01 | 9.64E-01 | 9.83E-01 | 1.00E+00 | 9.90E-01 |
| 465.30625 | 222.69 | 24.91 | 24.97 | 25.10 | 25.41 | 1.12E-02  | 9.84E-01 | 5.98E-01 | 8.91E-03 | 8.27E-01 | 3.19E-02 | 2.12E-01 |
| 465.32232 | 250.41 | 21.49 | 21.04 | 20.88 | 20.40 | 4.17E-04  | 2.56E-01 | 6.22E-02 | 1.18E-04 | 9.24E-01 | 6.38E-02 | 2.29E-01 |
| 465.80905 | 56.7   | 15.53 | 14.89 | 16.67 | 16.34 | 3.81E-22  | 7.66E-04 | 2.60E-10 | 1.71E-05 | 3.66E-14 | 8.85E-14 | 2.48E-01 |
| 465.88215 | 36.54  | 15.95 | 16.50 | 16.37 | 15.57 | 3.79E-06  | 1.21E-02 | 7.96E-02 | 1.68E-01 | 8.99E-01 | 9.37E-06 | 1.50E-04 |
| 465.89206 | 38.24  | 15.58 | 18.04 | 18.28 | 17.41 | 1.53E-34  | 5.33E-15 | 5.11E-15 | 4.17E-14 | 6.36E-01 | 1.25E-02 | 1.75E-04 |
| 465.94038 | 34.97  | 12.95 | 13.04 | 12.84 | 13.14 | 8.72E-01  | 9.94E-01 | 9.89E-01 | 9.54E-01 | 9.45E-01 | 9.94E-01 | 8.50E-01 |
| 465.9675  | 55.89  | 14.85 | 17.16 | 18.21 | 17.25 | 1.12E-32  | 4.40E-14 | 5.11E-15 | 4.31E-14 | 1.06E-04 | 9.83E-01 | 7.20E-04 |
| 466.12485 | 23.36  | 17.73 | 19.07 | 18.79 | 18.57 | 5.87E-11  | 6.74E-11 | 1.86E-07 | 1.06E-04 | 4.67E-01 | 5.77E-02 | 6.68E-01 |
| 466.29387 | 218.89 | 18.46 | 18.06 | 17.36 | 17.81 | 1.17E-08  | 9.51E-02 | 2.37E-09 | 1.37E-03 | 3.63E-04 | 4.85E-01 | 5.61E-02 |
| 466.30939 | 224.29 | 23.09 | 23.44 | 23.48 | 23.64 | 3.13E-03  | 8.01E-02 | 4.17E-02 | 1.90E-03 | 9.96E-01 | 5.84E-01 | 7.16E-01 |
| 466.32641 | 255.11 | 19.28 | 19.11 | 18.89 | 18.24 | 1.08E-02  | 9.49E-01 | 5.96E-01 | 6.98E-03 | 9.03E-01 | 4.14E-02 | 1.85E-01 |
| 466.75731 | 72.05  | 14.74 | 12.78 | 15.21 | 15.15 | 3.51E-38  | 7.33E-15 | 1.89E-02 | 7.48E-02 | 5.11E-15 | 5.11E-15 | 9.78E-01 |
| 466.77996 | 77.22  | 17.78 | 16.69 | 17.14 | 16.81 | 4.73E-15  | 8.97E-14 | 9.08E-06 | 4.34E-11 | 4.58E-03 | 8.19E-01 | 7.52E-02 |
| 466.80386 | 55.81  | 18.20 | 18.35 | 19.51 | 19.26 | 1.16E-23  | 6.53E-01 | 4.15E-14 | 6.60E-13 | 4.79E-14 | 1.58E-09 | 2.70E-01 |
| 466.82414 | 57.23  | 14.59 | 12.42 | 14.09 | 14.19 | 1.77E-13  | 2.63E-13 | 2.29E-01 | 4.66E-01 | 2.91E-08 | 1.14E-08 | 9.82E-01 |
| 466.83594 | 40.45  | 12.91 | 12.72 | 13.92 | 12.27 | 5.84E-02  | 9.89E-01 | 3.17E-01 | 7.15E-01 | 1.98E-01 | 8.87E-01 | 4.09E-02 |
| 466.87448 | 33.72  | 11.86 | 15.20 | 15.50 | 14.73 | 5.62E-34  | 5.77E-15 | 5.11E-15 | 4.06E-14 | 7.16E-01 | 3.41E-01 | 3.57E-02 |
| 466.91679 | 32.63  | 16.29 | 18.17 | 18.30 | 18.01 | 3.65E-30  | 1.64E-14 | 6.00E-15 | 4.19E-14 | 8.83E-01 | 7.91E-01 | 3.53E-01 |
| 466.93917 | 41.81  | 16.99 | 18.86 | 18.77 | 18.91 | 2.70E-17  | 2.37E-13 | 1.67E-12 | 2.66E-13 | 9.77E-01 | 9.98E-01 | 9.38E-01 |
| 466.96351 | 18.74  | 15.66 | 16.68 | 17.08 | 16.90 | 5.05E-09  | 8.59E-05 | 1.26E-08 | 1.88E-06 | 3.14E-01 | 7.89E-01 | 8.79E-01 |
| 466.98066 | 65.3   | 13.16 | 15.63 | 11.08 | 11.83 | 3.76E-103 | 5.11E-15 | 5.11E-15 | 1.53E-14 | 5.11E-15 | 5.11E-15 | 6.75E-09 |



|           |        |       |       |       |       |           |          |          |          |          |          |          |
|-----------|--------|-------|-------|-------|-------|-----------|----------|----------|----------|----------|----------|----------|
| 467.00004 | 21.33  | 11.95 | 16.36 | 15.69 | 15.62 | 3.17E-18  | 4.22E-14 | 1.13E-12 | 1.28E-11 | 5.24E-01 | 4.73E-01 | 9.99E-01 |
| 467.04091 | 17.73  | 14.67 | 19.63 | 17.34 | 17.00 | 4.00E-40  | 5.11E-15 | 4.32E-14 | 6.12E-13 | 1.24E-12 | 4.82E-14 | 6.67E-01 |
| 467.12809 | 22.67  | 12.77 | 14.49 | 13.58 | 13.36 | 2.62E-03  | 8.93E-04 | 2.57E-01 | 5.69E-01 | 1.97E-01 | 8.18E-02 | 9.64E-01 |
| 467.20591 | 22.74  | 13.94 | 13.52 | 14.48 | 16.04 | 7.46E-06  | 8.15E-01 | 6.58E-01 | 1.38E-04 | 1.98E-01 | 5.82E-06 | 1.01E-02 |
| 467.30679 | 227.66 | 21.35 | 21.59 | 21.63 | 21.86 | 2.76E-02  | 4.49E-01 | 3.03E-01 | 1.27E-02 | 9.95E-01 | 3.92E-01 | 5.26E-01 |
| 467.30915 | 290.38 | 19.32 | 19.34 | 19.48 | 19.53 | 7.88E-01  | 1.00E+00 | 9.05E-01 | 8.26E-01 | 9.39E-01 | 8.73E-01 | 9.97E-01 |
| 467.32051 | 210.47 | 15.40 | 15.31 | 15.49 | 16.48 | 9.89E-03  | 9.96E-01 | 9.94E-01 | 2.08E-02 | 9.67E-01 | 1.40E-02 | 4.66E-02 |
| 467.80714 | 58.1   | 12.94 | 10.18 | 13.71 | 13.52 | 7.42E-26  | 4.31E-14 | 5.35E-02 | 2.40E-01 | 1.64E-14 | 4.06E-14 | 9.37E-01 |
| 467.89827 | 36.8   | 17.22 | 17.76 | 18.05 | 17.05 | 9.84E-05  | 9.26E-02 | 2.10E-03 | 8.93E-01 | 6.16E-01 | 2.08E-02 | 3.12E-04 |
| 467.96638 | 53.94  | 11.23 | 12.93 | 13.92 | 13.71 | 1.28E-11  | 7.48E-05 | 8.86E-11 | 7.11E-09 | 5.67E-02 | 2.11E-01 | 9.56E-01 |
| 468.04717 | 57.47  | 11.93 | 15.46 | 9.78  | 11.17 | 3.53E-57  | 5.11E-15 | 5.06E-14 | 1.83E-02 | 5.11E-15 | 5.11E-15 | 1.59E-06 |
| 468.14324 | 22.96  | 12.29 | 15.35 | 13.54 | 12.55 | 1.23E-18  | 4.40E-14 | 5.85E-04 | 8.50E-01 | 4.23E-07 | 9.95E-14 | 1.81E-02 |
| 468.27282 | 187.02 | 14.45 | 14.43 | 14.85 | 13.80 | 1.10E-07  | 1.00E+00 | 5.91E-02 | 6.79E-04 | 5.56E-02 | 1.44E-03 | 1.36E-08 |
| 468.28256 | 273.86 | 19.04 | 20.01 | 20.23 | 19.91 | 3.73E-13  | 8.02E-09 | 1.08E-12 | 4.26E-07 | 4.87E-01 | 9.39E-01 | 2.03E-01 |
| 468.30702 | 287.57 | 17.43 | 17.84 | 18.18 | 17.90 | 9.81E-08  | 4.47E-03 | 1.49E-08 | 1.41E-03 | 3.63E-02 | 9.78E-01 | 1.17E-01 |
| 468.32392 | 210.78 | 14.86 | 13.42 | 13.25 | 14.88 | 2.05E-07  | 2.65E-04 | 2.83E-05 | 1.00E+00 | 9.64E-01 | 5.46E-04 | 7.19E-05 |
| 468.77614 | 77.46  | 14.30 | 11.33 | 11.51 | 11.32 | 1.18E-12  | 4.77E-10 | 3.54E-09 | 1.20E-09 | 9.77E-01 | 1.00E+00 | 9.77E-01 |
| 468.80168 | 57.93  | 15.22 | 13.48 | 16.18 | 15.76 | 1.55E-23  | 1.27E-11 | 3.01E-04 | 1.16E-01 | 1.93E-14 | 4.22E-14 | 3.19E-01 |
| 468.85271 | 42.56  | 15.07 | 14.92 | 15.66 | 14.36 | 9.21E-03  | 9.75E-01 | 3.60E-01 | 2.13E-01 | 1.91E-01 | 4.43E-01 | 3.63E-03 |
| 468.87674 | 44.89  | 19.09 | 19.67 | 19.53 | 19.62 | 1.28E-07  | 4.50E-07 | 2.08E-04 | 1.13E-05 | 5.28E-01 | 9.55E-01 | 8.53E-01 |
| 468.89749 | 44.96  | 19.95 | 22.41 | 22.35 | 22.25 | 2.04E-32  | 5.77E-15 | 6.22E-15 | 2.00E-14 | 9.91E-01 | 8.59E-01 | 9.56E-01 |
| 468.98064 | 66.47  | 18.21 | 19.84 | 17.74 | 17.79 | 5.24E-94  | 5.11E-15 | 4.10E-12 | 1.60E-09 | 5.11E-15 | 5.11E-15 | 8.83E-01 |
| 469.25723 | 151.12 | 14.81 | 12.44 | 13.66 | 13.40 | 6.12E-14  | 4.75E-14 | 1.64E-04 | 5.74E-06 | 1.06E-04 | 5.14E-03 | 8.08E-01 |
| 469.28479 | 184.17 | 15.88 | 15.71 | 15.49 | 16.42 | 1.16E-04  | 8.01E-01 | 1.78E-01 | 3.83E-02 | 6.97E-01 | 3.40E-03 | 4.85E-05 |
| 469.31004 | 200.66 | 16.16 | 14.87 | 15.04 | 15.37 | 2.14E-05  | 2.88E-05 | 3.36E-04 | 3.04E-02 | 9.28E-01 | 3.03E-01 | 6.51E-01 |
| 469.8799  | 49     | 13.60 | 13.25 | 13.14 | 13.02 | 2.88E-01  | 6.67E-01 | 4.47E-01 | 2.63E-01 | 9.88E-01 | 8.97E-01 | 9.80E-01 |
| 469.89077 | 33.27  | 14.47 | 13.86 | 14.43 | 13.70 | 2.62E-02  | 1.78E-01 | 9.99E-01 | 6.36E-02 | 2.48E-01 | 9.60E-01 | 9.73E-02 |
| 469.90086 | 45.11  | 15.75 | 18.44 | 18.38 | 18.31 | 8.38E-33  | 5.77E-15 | 6.00E-15 | 1.42E-14 | 9.94E-01 | 9.48E-01 | 9.90E-01 |
| 469.91126 | 31.86  | 13.39 | 15.45 | 15.34 | 14.79 | 2.39E-11  | 4.62E-10 | 2.47E-09 | 5.57E-05 | 9.85E-01 | 1.65E-01 | 3.00E-01 |
| 469.98336 | 38.92  | 15.60 | 19.23 | 19.38 | 18.17 | 6.94E-78  | 5.11E-15 | 5.11E-15 | 5.11E-15 | 7.45E-01 | 6.97E-11 | 1.58E-13 |
| 470.00075 | 28.66  | 11.57 | 14.23 | 14.15 | 12.73 | 1.81E-24  | 3.70E-14 | 3.99E-14 | 7.65E-05 | 9.89E-01 | 2.94E-07 | 1.08E-06 |
| 470.02511 | 33.24  | 15.53 | 14.78 | 14.56 | 14.65 | 9.58E-03  | 8.47E-02 | 1.18E-02 | 3.56E-02 | 9.05E-01 | 9.80E-01 | 9.93E-01 |
| 470.06166 | 20.6   | 15.35 | 15.49 | 14.76 | 15.16 | 1.35E-01  | 9.74E-01 | 2.41E-01 | 9.32E-01 | 1.17E-01 | 7.58E-01 | 6.35E-01 |
| 470.07548 | 26.03  | 11.69 | 12.99 | 13.66 | 11.28 | 9.83E-17  | 1.65E-05 | 2.14E-11 | 4.44E-01 | 7.39E-02 | 4.50E-08 | 7.17E-14 |
| 470.28776 | 178.78 | 12.32 | 12.30 | 11.91 | 13.50 | 5.78E-03  | 1.00E+00 | 7.77E-01 | 4.51E-02 | 8.14E-01 | 4.91E-02 | 3.38E-03 |
| 470.33171 | 198.67 | 15.41 | 15.41 | 15.71 | 14.97 | 3.89E-03  | 1.00E+00 | 3.68E-01 | 1.11E-01 | 4.09E-01 | 1.21E-01 | 1.27E-03 |
| 470.3492  | 202.31 | 15.83 | 19.52 | 19.37 | 18.85 | 6.71E-45  | 5.11E-15 | 5.11E-15 | 5.11E-15 | 9.18E-01 | 2.87E-02 | 1.29E-01 |
| 470.77017 | 57.19  | 17.66 | 15.89 | 18.05 | 18.24 | 1.30E-24  | 5.08E-14 | 2.20E-01 | 2.94E-02 | 4.05E-14 | 3.04E-14 | 8.00E-01 |
| 470.79155 | 84.28  | 12.93 | 10.83 | 13.94 | 11.63 | 8.45E-07  | 1.37E-03 | 2.75E-01 | 1.12E-01 | 9.94E-07 | 5.35E-01 | 6.88E-04 |
| 470.8139  | 63.65  | 18.22 | 17.43 | 18.18 | 17.83 | 6.15E-17  | 4.69E-14 | 9.61E-01 | 1.95E-04 | 2.26E-13 | 2.18E-04 | 1.59E-03 |
| 470.83475 | 41.96  | 22.18 | 23.00 | 23.09 | 22.91 | 1.94E-33  | 7.11E-15 | 5.11E-15 | 4.09E-14 | 5.53E-01 | 5.83E-01 | 5.30E-02 |
| 470.87406 | 47.24  | 15.86 | 15.73 | 15.41 | 15.81 | 2.00E-02  | 8.37E-01 | 1.73E-02 | 9.89E-01 | 1.68E-01 | 9.63E-01 | 6.24E-02 |
| 470.89249 | 39.34  | 18.89 | 19.97 | 19.90 | 19.98 | 8.90E-31  | 9.55E-15 | 2.22E-14 | 1.24E-14 | 8.85E-01 | 1.00E+00 | 8.63E-01 |
| 470.979   | 69     | 8.98  | 16.84 | 8.94  | 8.55  | 1.73E-93  | 5.11E-15 | 9.98E-01 | 3.58E-01 | 5.11E-15 | 5.11E-15 | 4.72E-01 |
| 470.997   | 63.4   | 14.03 | 21.09 | 11.74 | 12.53 | 1.18E-140 | 5.11E-15 | 5.11E-15 | 4.34E-14 | 5.11E-15 | 5.11E-15 | 1.44E-05 |

|           |        |       |       |       |       |           |          |          |          |          |          |          |
|-----------|--------|-------|-------|-------|-------|-----------|----------|----------|----------|----------|----------|----------|
| 471.07005 | 20.91  | 18.18 | 21.17 | 20.17 | 19.49 | 4.47E-17  | 4.35E-14 | 4.12E-09 | 3.14E-04 | 9.56E-03 | 4.05E-06 | 1.65E-01 |
| 471.15264 | 22.23  | 15.38 | 16.22 | 16.09 | 15.33 | 1.84E-02  | 7.19E-02 | 1.59E-01 | 9.99E-01 | 9.84E-01 | 6.89E-02 | 1.47E-01 |
| 471.17705 | 85.65  | 16.22 | 14.88 | 16.97 | 17.31 | 1.40E-12  | 1.12E-04 | 6.76E-02 | 3.38E-03 | 1.16E-09 | 8.00E-12 | 7.06E-01 |
| 471.33338 | 250.06 | 15.27 | 15.32 | 15.69 | 14.56 | 1.03E-02  | 9.98E-01 | 5.29E-01 | 1.38E-01 | 6.57E-01 | 1.11E-01 | 4.39E-03 |
| 471.3335  | 182.2  | 16.61 | 16.42 | 15.68 | 14.11 | 3.81E-16  | 8.92E-01 | 4.58E-03 | 4.55E-14 | 4.96E-02 | 8.54E-13 | 8.63E-07 |
| 471.35181 | 199.44 | 14.33 | 16.97 | 16.87 | 16.76 | 6.11E-43  | 5.11E-15 | 5.11E-15 | 5.11E-15 | 9.33E-01 | 6.42E-01 | 9.31E-01 |
| 471.83817 | 48.99  | 18.00 | 18.86 | 18.85 | 18.80 | 3.59E-25  | 4.00E-14 | 4.02E-14 | 4.44E-14 | 1.00E+00 | 8.78E-01 | 9.10E-01 |
| 471.88736 | 30.9   | 13.89 | 14.47 | 14.38 | 14.13 | 1.51E-01  | 1.51E-01 | 2.80E-01 | 8.40E-01 | 9.87E-01 | 6.28E-01 | 8.14E-01 |
| 471.89662 | 45.56  | 13.64 | 14.00 | 13.70 | 14.21 | 2.00E-02  | 2.52E-01 | 9.91E-01 | 2.74E-02 | 4.24E-01 | 7.61E-01 | 6.65E-02 |
| 471.99851 | 62.33  | 14.90 | 17.81 | 13.42 | 13.84 | 1.29E-134 | 5.11E-15 | 5.11E-15 | 5.11E-15 | 5.11E-15 | 5.11E-15 | 2.47E-06 |
| 472.01506 | 21.62  | 19.76 | 21.35 | 21.17 | 20.78 | 2.57E-19  | 4.37E-14 | 5.11E-14 | 4.33E-08 | 7.00E-01 | 6.61E-03 | 1.13E-01 |
| 472.05581 | 20.66  | 17.80 | 21.33 | 21.25 | 20.25 | 1.29E-26  | 2.00E-14 | 2.38E-14 | 4.18E-12 | 9.95E-01 | 6.89E-03 | 1.30E-02 |
| 472.18082 | 88.14  | 12.51 | 10.37 | 13.34 | 14.04 | 3.86E-12  | 3.47E-05 | 2.70E-01 | 7.52E-03 | 9.04E-09 | 6.81E-12 | 4.63E-01 |
| 472.2148  | 174.64 | 10.32 | 10.84 | 11.30 | 10.53 | 9.99E-02  | 5.91E-01 | 7.66E-02 | 9.63E-01 | 6.81E-01 | 8.88E-01 | 2.68E-01 |
| 472.24325 | 187.71 | 13.61 | 12.50 | 12.44 | 13.71 | 7.86E-07  | 5.86E-04 | 2.09E-04 | 9.86E-01 | 9.96E-01 | 3.56E-04 | 1.32E-04 |
| 472.33238 | 182.68 | 14.80 | 16.30 | 15.06 | 14.87 | 1.90E-05  | 3.88E-05 | 8.49E-01 | 9.96E-01 | 1.34E-03 | 2.56E-04 | 9.44E-01 |
| 472.3472  | 205.33 | 16.83 | 16.95 | 16.95 | 16.54 | 7.59E-02  | 8.90E-01 | 8.89E-01 | 3.28E-01 | 1.00E+00 | 9.43E-02 | 9.10E-02 |
| 472.36489 | 189.04 | 13.71 | 14.30 | 14.53 | 14.06 | 7.65E-02  | 2.73E-01 | 5.42E-02 | 7.23E-01 | 8.93E-01 | 8.98E-01 | 5.03E-01 |
| 472.771   | 61.69  | 19.99 | 20.06 | 20.27 | 20.39 | 1.57E-04  | 8.89E-01 | 1.68E-02 | 3.13E-04 | 1.30E-01 | 5.71E-03 | 6.16E-01 |
| 472.79285 | 73.31  | 15.62 | 15.04 | 15.95 | 15.70 | 1.51E-11  | 1.03E-05 | 1.94E-02 | 8.93E-01 | 3.50E-12 | 1.32E-06 | 1.63E-01 |
| 472.81137 | 72.48  | 15.32 | 13.46 | 14.59 | 14.47 | 4.04E-27  | 5.11E-15 | 2.05E-06 | 9.36E-08 | 1.34E-12 | 6.16E-10 | 8.63E-01 |
| 472.83383 | 43.32  | 19.92 | 20.65 | 20.58 | 20.68 | 4.61E-23  | 4.35E-14 | 4.46E-14 | 4.33E-14 | 7.89E-01 | 9.89E-01 | 6.10E-01 |
| 472.85033 | 48.14  | 21.23 | 22.62 | 22.68 | 22.52 | 5.67E-47  | 5.11E-15 | 5.11E-15 | 5.11E-15 | 9.09E-01 | 6.86E-01 | 2.92E-01 |
| 472.88752 | 44.64  | 16.54 | 17.02 | 16.82 | 17.27 | 1.00E-05  | 4.00E-03 | 1.95E-01 | 4.28E-06 | 4.83E-01 | 3.19E-01 | 1.09E-02 |
| 472.99466 | 65.39  | 16.68 | 18.47 | 16.09 | 16.22 | 2.56E-118 | 5.11E-15 | 1.60E-14 | 6.42E-14 | 5.11E-15 | 5.11E-15 | 6.02E-02 |
| 473.0173  | 23.75  | 15.75 | 16.87 | 16.60 | 16.42 | 5.22E-12  | 3.24E-12 | 1.24E-07 | 8.03E-05 | 2.43E-01 | 1.85E-02 | 6.61E-01 |
| 473.05884 | 17.39  | 14.04 | 17.55 | 17.67 | 16.77 | 8.61E-28  | 2.20E-14 | 1.07E-14 | 6.29E-14 | 9.82E-01 | 8.60E-02 | 3.23E-02 |
| 473.23931 | 64.07  | 11.34 | 21.44 | 9.29  | 9.75  | 7.36E-131 | 5.11E-15 | 4.59E-14 | 1.93E-09 | 5.11E-15 | 5.11E-15 | 2.42E-01 |
| 473.24968 | 192.53 | 16.64 | 16.43 | 16.62 | 15.63 | 2.45E-08  | 5.91E-01 | 9.99E-01 | 1.05E-07 | 6.88E-01 | 6.49E-05 | 3.55E-07 |
| 473.28325 | 176.8  | 19.96 | 19.83 | 20.21 | 19.72 | 5.78E-06  | 4.70E-01 | 3.61E-02 | 4.99E-02 | 4.06E-04 | 6.62E-01 | 4.18E-06 |
| 473.34999 | 201    | 15.07 | 13.88 | 14.32 | 13.87 | 3.48E-05  | 1.31E-04 | 3.21E-02 | 1.76E-04 | 3.97E-01 | 1.00E+00 | 3.97E-01 |
| 473.75142 | 190.95 | 15.15 | 14.78 | 15.20 | 13.96 | 2.20E-04  | 5.83E-01 | 9.98E-01 | 5.62E-04 | 4.88E-01 | 4.18E-02 | 3.88E-04 |
| 473.7755  | 73.76  | 14.22 | 13.51 | 15.56 | 15.07 | 2.31E-17  | 6.38E-03 | 1.56E-08 | 1.02E-03 | 4.42E-14 | 5.00E-10 | 1.43E-01 |
| 473.83936 | 33.39  | 15.29 | 16.54 | 16.06 | 16.08 | 3.41E-10  | 6.28E-11 | 6.18E-05 | 8.61E-05 | 4.15E-02 | 6.32E-02 | 1.00E+00 |
| 473.85383 | 42.53  | 16.66 | 18.43 | 18.50 | 18.28 | 4.16E-49  | 5.11E-15 | 5.11E-15 | 5.11E-15 | 9.25E-01 | 5.52E-01 | 2.15E-01 |
| 474.01085 | 26.35  | 16.48 | 18.19 | 18.12 | 17.35 | 9.62E-19  | 4.26E-14 | 4.60E-14 | 5.59E-05 | 9.86E-01 | 2.37E-04 | 7.65E-04 |
| 474.12084 | 25.23  | 13.21 | 15.71 | 12.47 | 12.11 | 8.10E-14  | 2.21E-07 | 3.26E-01 | 7.07E-02 | 4.39E-11 | 1.57E-12 | 8.57E-01 |
| 474.24271 | 55.85  | 17.70 | 19.17 | 17.22 | 17.28 | 5.99E-80  | 5.11E-15 | 6.34E-11 | 4.44E-08 | 5.11E-15 | 5.11E-15 | 8.05E-01 |
| 474.26221 | 192.33 | 18.21 | 17.53 | 17.65 | 17.13 | 1.85E-11  | 9.14E-06 | 3.36E-04 | 2.92E-12 | 8.25E-01 | 2.83E-02 | 1.77E-03 |
| 474.28661 | 176.81 | 18.20 | 18.00 | 18.40 | 17.89 | 6.62E-07  | 1.43E-01 | 1.04E-01 | 5.42E-03 | 1.38E-04 | 6.17E-01 | 8.34E-07 |
| 474.34421 | 212.99 | 16.70 | 18.71 | 17.15 | 16.13 | 2.82E-17  | 2.67E-12 | 3.05E-01 | 1.54E-01 | 9.94E-08 | 4.36E-14 | 1.45E-03 |
| 474.36356 | 229.31 | 16.50 | 15.65 | 15.71 | 15.49 | 3.33E-05  | 8.59E-04 | 1.88E-03 | 7.67E-05 | 9.95E-01 | 9.04E-01 | 7.93E-01 |
| 474.75937 | 195.1  | 14.93 | 14.99 | 14.09 | 14.04 | 1.22E-02  | 9.98E-01 | 9.64E-02 | 8.52E-02 | 7.59E-02 | 6.71E-02 | 9.99E-01 |
| 474.77047 | 69.09  | 18.29 | 18.26 | 19.14 | 18.72 | 2.08E-19  | 9.89E-01 | 4.42E-14 | 8.38E-05 | 4.22E-14 | 3.85E-05 | 1.65E-04 |
| 474.78785 | 56.11  | 20.54 | 20.67 | 21.51 | 21.18 | 1.17E-35  | 2.26E-01 | 5.11E-15 | 4.37E-14 | 7.77E-15 | 1.29E-10 | 6.09E-05 |

|           |        |       |       |       |       |           |          |          |          |          |          |          |
|-----------|--------|-------|-------|-------|-------|-----------|----------|----------|----------|----------|----------|----------|
| 474.82888 | 58.12  | 16.19 | 14.84 | 15.80 | 16.05 | 2.69E-23  | 2.51E-14 | 8.00E-03 | 6.85E-01 | 2.10E-12 | 4.33E-14 | 2.06E-01 |
| 474.84847 | 45     | 19.50 | 20.68 | 20.91 | 20.79 | 2.39E-37  | 7.33E-15 | 5.11E-15 | 5.33E-15 | 9.91E-02 | 7.52E-01 | 5.97E-01 |
| 474.86344 | 36.22  | 17.40 | 18.67 | 18.84 | 18.73 | 1.06E-27  | 4.13E-14 | 1.22E-14 | 4.02E-14 | 5.39E-01 | 9.70E-01 | 8.29E-01 |
| 474.87982 | 200.15 | 16.06 | 16.46 | 16.74 | 16.29 | 2.41E-12  | 3.33E-05 | 5.58E-13 | 5.29E-02 | 9.15E-03 | 2.25E-01 | 6.05E-06 |
| 474.90883 | 21.03  | 16.33 | 15.75 | 15.70 | 15.91 | 1.61E-01  | 2.34E-01 | 1.71E-01 | 5.49E-01 | 9.99E-01 | 9.57E-01 | 9.16E-01 |
| 474.92548 | 37.97  | 15.15 | 15.21 | 15.01 | 15.13 | 8.85E-01  | 9.94E-01 | 9.45E-01 | 1.00E+00 | 8.57E-01 | 9.89E-01 | 9.68E-01 |
| 474.96714 | 31.78  | 14.52 | 15.02 | 14.71 | 14.78 | 3.07E-01  | 2.26E-01 | 8.77E-01 | 7.65E-01 | 6.62E-01 | 8.23E-01 | 9.95E-01 |
| 475.03083 | 47.53  | 11.38 | 16.72 | 9.35  | 10.65 | 5.79E-57  | 5.11E-15 | 2.55E-08 | 1.44E-01 | 5.11E-15 | 5.11E-15 | 1.56E-03 |
| 475.0595  | 25.56  | 16.16 | 19.34 | 16.40 | 16.26 | 2.38E-44  | 5.11E-15 | 6.03E-01 | 9.64E-01 | 5.11E-15 | 5.11E-15 | 8.94E-01 |
| 475.19777 | 181.8  | 14.52 | 14.32 | 14.60 | 14.28 | 3.28E-03  | 1.51E-01 | 8.61E-01 | 6.79E-02 | 2.55E-02 | 9.79E-01 | 9.51E-03 |
| 475.20878 | 191.57 | 15.44 | 12.21 | 13.04 | 13.29 | 2.24E-20  | 4.04E-14 | 1.22E-12 | 6.21E-10 | 4.32E-02 | 5.89E-03 | 8.71E-01 |
| 475.23403 | 177.59 | 11.86 | 11.77 | 13.01 | 10.82 | 8.25E-06  | 9.96E-01 | 1.80E-02 | 5.15E-02 | 1.18E-02 | 1.04E-01 | 1.47E-06 |
| 475.24541 | 63.36  | 13.49 | 14.98 | 11.46 | 12.27 | 2.81E-59  | 4.27E-14 | 5.11E-15 | 2.36E-12 | 5.11E-15 | 5.11E-15 | 5.62E-06 |
| 475.26617 | 187.27 | 16.36 | 15.36 | 15.69 | 14.86 | 6.64E-15  | 3.12E-08 | 3.27E-04 | 4.55E-14 | 2.02E-01 | 2.73E-02 | 2.08E-05 |
| 475.28856 | 181.72 | 16.93 | 15.28 | 15.80 | 15.38 | 9.37E-22  | 4.24E-14 | 1.56E-10 | 4.35E-14 | 1.02E-02 | 9.48E-01 | 6.00E-02 |
| 475.30731 | 78.07  | 13.86 | 9.96  | 13.96 | 14.36 | 1.64E-22  | 4.35E-14 | 9.95E-01 | 6.48E-01 | 4.40E-14 | 4.41E-14 | 7.97E-01 |
| 475.30744 | 250.08 | 14.97 | 15.67 | 16.33 | 15.49 | 4.02E-02  | 4.39E-01 | 1.99E-02 | 6.93E-01 | 5.21E-01 | 9.84E-01 | 3.29E-01 |
| 475.34454 | 215.41 | 15.82 | 16.96 | 16.28 | 15.83 | 8.22E-05  | 1.49E-04 | 2.96E-01 | 1.00E+00 | 6.15E-02 | 4.56E-04 | 3.74E-01 |
| 475.79151 | 57.1   | 15.48 | 14.09 | 16.64 | 16.03 | 1.39E-44  | 4.35E-14 | 6.46E-14 | 8.29E-04 | 5.11E-15 | 5.11E-15 | 1.97E-04 |
| 475.85202 | 46.22  | 14.16 | 15.24 | 15.61 | 15.77 | 5.19E-28  | 1.88E-13 | 2.38E-14 | 8.88E-15 | 2.75E-02 | 9.76E-04 | 6.80E-01 |
| 475.92798 | 31.07  | 12.39 | 12.56 | 13.82 | 11.88 | 4.59E-08  | 9.50E-01 | 2.36E-05 | 3.53E-01 | 3.86E-04 | 1.51E-01 | 2.82E-08 |
| 475.9495  | 64.64  | 12.82 | 12.23 | 12.88 | 14.18 | 1.67E-14  | 2.69E-02 | 9.93E-01 | 1.15E-08 | 1.50E-02 | 4.51E-14 | 8.32E-08 |
| 475.96037 | 26.5   | 17.34 | 16.53 | 16.37 | 16.43 | 1.55E-06  | 2.87E-04 | 7.19E-06 | 6.03E-05 | 8.59E-01 | 9.66E-01 | 9.91E-01 |
| 476.05482 | 61.56  | 12.99 | 14.76 | 11.06 | 11.71 | 2.89E-68  | 5.77E-15 | 5.11E-15 | 5.00E-14 | 5.11E-15 | 5.11E-15 | 1.39E-04 |
| 476.07551 | 18.79  | 15.18 | 16.41 | 16.10 | 15.91 | 8.44E-02  | 6.24E-02 | 2.37E-01 | 4.68E-01 | 9.25E-01 | 7.73E-01 | 9.84E-01 |
| 476.2327  | 25.33  | 15.00 | 13.30 | 14.19 | 15.65 | 1.54E-06  | 3.77E-04 | 2.07E-01 | 4.20E-01 | 1.60E-01 | 1.31E-06 | 5.06E-03 |
| 476.27881 | 199.1  | 23.09 | 23.11 | 23.07 | 22.74 | 3.96E-03  | 9.95E-01 | 9.98E-01 | 1.03E-02 | 9.77E-01 | 6.57E-03 | 2.07E-02 |
| 476.30234 | 226.06 | 16.95 | 14.07 | 15.44 | 16.58 | 2.86E-18  | 4.51E-14 | 5.92E-06 | 6.36E-01 | 8.35E-05 | 1.00E-12 | 2.18E-03 |
| 476.76843 | 75.55  | 14.20 | 12.99 | 14.66 | 14.10 | 9.91E-11  | 1.07E-06 | 1.63E-01 | 9.70E-01 | 3.07E-11 | 2.98E-05 | 7.90E-02 |
| 476.78496 | 50.96  | 18.81 | 18.67 | 19.69 | 19.32 | 1.67E-24  | 4.44E-01 | 4.13E-14 | 8.94E-07 | 3.00E-14 | 1.06E-09 | 7.99E-04 |
| 476.84142 | 43.63  | 16.75 | 17.51 | 17.78 | 17.13 | 4.38E-10  | 5.68E-06 | 4.28E-10 | 7.11E-02 | 3.20E-01 | 8.03E-02 | 3.53E-04 |
| 476.86341 | 46.05  | 18.11 | 17.31 | 17.12 | 17.78 | 2.86E-05  | 1.59E-03 | 4.34E-05 | 4.58E-01 | 8.35E-01 | 1.66E-01 | 2.08E-02 |
| 476.87735 | 197.1  | 15.54 | 15.70 | 16.33 | 15.89 | 3.41E-09  | 5.60E-01 | 1.74E-09 | 2.99E-02 | 3.70E-06 | 4.60E-01 | 2.83E-03 |
| 476.88428 | 47.66  | 16.93 | 17.23 | 18.13 | 17.64 | 3.84E-12  | 2.13E-01 | 2.55E-12 | 9.68E-05 | 4.09E-07 | 7.21E-02 | 1.66E-02 |
| 477.0025  | 52.22  | 14.27 | 11.04 | 16.17 | 15.45 | 4.86E-39  | 4.30E-14 | 3.58E-08 | 2.05E-03 | 5.11E-15 | 5.11E-15 | 1.31E-01 |
| 477.00938 | 62.11  | 12.87 | 22.63 | 11.07 | 11.33 | 1.14E-143 | 5.11E-15 | 4.27E-14 | 2.79E-12 | 5.11E-15 | 5.11E-15 | 5.94E-01 |
| 477.16186 | 22.69  | 15.61 | 16.29 | 15.84 | 15.36 | 3.91E-02  | 1.38E-01 | 8.73E-01 | 8.63E-01 | 5.13E-01 | 2.77E-02 | 4.49E-01 |
| 477.22373 | 163.49 | 14.23 | 15.33 | 15.91 | 14.96 | 3.19E-19  | 9.60E-10 | 4.00E-14 | 1.29E-04 | 3.12E-03 | 1.42E-01 | 4.22E-07 |
| 477.2497  | 188.59 | 15.15 | 15.51 | 15.88 | 15.39 | 3.54E-02  | 4.87E-01 | 1.84E-02 | 7.93E-01 | 4.57E-01 | 9.70E-01 | 2.36E-01 |
| 477.28227 | 198.93 | 21.02 | 20.98 | 20.98 | 20.64 | 5.12E-03  | 9.86E-01 | 9.83E-01 | 5.95E-03 | 1.00E+00 | 2.18E-02 | 2.13E-02 |
| 477.30422 | 199.09 | 19.77 | 20.33 | 20.47 | 20.06 | 4.72E-04  | 8.47E-03 | 4.08E-04 | 3.81E-01 | 8.56E-01 | 4.52E-01 | 1.09E-01 |
| 477.32438 | 276.85 | 17.37 | 16.82 | 16.95 | 17.07 | 6.06E-02  | 4.58E-02 | 1.77E-01 | 5.06E-01 | 9.35E-01 | 6.70E-01 | 9.42E-01 |
| 477.95816 | 28.82  | 15.95 | 15.40 | 15.02 | 15.10 | 6.29E-05  | 4.88E-02 | 9.34E-05 | 7.10E-04 | 3.06E-01 | 5.39E-01 | 9.86E-01 |
| 478.01298 | 53.98  | 13.01 | 19.71 | 10.84 | 11.55 | 8.68E-160 | 5.11E-15 | 5.11E-15 | 9.55E-15 | 5.11E-15 | 5.11E-15 | 2.88E-07 |
| 478.16558 | 21.47  | 19.12 | 20.09 | 19.82 | 19.20 | 2.74E-05  | 1.31E-04 | 9.30E-03 | 9.85E-01 | 6.49E-01 | 1.22E-03 | 4.17E-02 |

|           |        |       |       |       |       |           |          |          |          |          |          |          |
|-----------|--------|-------|-------|-------|-------|-----------|----------|----------|----------|----------|----------|----------|
| 478.28418 | 202.45 | 17.00 | 16.52 | 16.27 | 15.96 | 9.87E-02  | 6.61E-01 | 2.86E-01 | 7.36E-02 | 9.31E-01 | 5.75E-01 | 8.96E-01 |
| 478.29459 | 218.01 | 24.07 | 24.29 | 24.21 | 23.91 | 2.47E-03  | 1.33E-01 | 5.21E-01 | 3.72E-01 | 8.52E-01 | 1.94E-03 | 2.25E-02 |
| 478.30811 | 199.36 | 16.97 | 18.23 | 18.51 | 18.08 | 3.43E-10  | 5.92E-07 | 5.77E-10 | 2.66E-05 | 6.26E-01 | 9.16E-01 | 2.64E-01 |
| 478.71742 | 81.15  | 13.96 | 12.97 | 14.53 | 14.29 | 4.09E-10  | 7.80E-05 | 5.37E-02 | 4.91E-01 | 4.29E-10 | 3.76E-07 | 7.28E-01 |
| 478.7806  | 61.31  | 16.32 | 13.18 | 16.00 | 16.08 | 3.14E-45  | 5.11E-15 | 3.15E-01 | 5.91E-01 | 5.11E-15 | 5.11E-15 | 9.79E-01 |
| 478.79819 | 73.43  | 17.02 | 15.54 | 16.16 | 16.10 | 4.98E-14  | 4.94E-14 | 4.98E-06 | 1.97E-06 | 2.33E-03 | 1.14E-02 | 9.84E-01 |
| 478.82186 | 54.6   | 18.40 | 17.67 | 18.95 | 18.81 | 2.30E-22  | 1.09E-08 | 2.21E-05 | 4.79E-03 | 3.40E-14 | 4.25E-14 | 6.38E-01 |
| 478.84202 | 57.15  | 14.94 | 11.90 | 13.97 | 14.59 | 1.12E-39  | 5.11E-15 | 2.91E-06 | 2.71E-01 | 3.46E-14 | 5.11E-15 | 1.05E-02 |
| 478.86042 | 58.87  | 15.64 | 9.58  | 11.99 | 12.39 | 9.91E-16  | 4.44E-14 | 2.72E-07 | 1.23E-05 | 1.89E-03 | 3.34E-04 | 9.37E-01 |
| 478.8796  | 35.03  | 17.44 | 19.62 | 19.05 | 19.14 | 2.93E-17  | 4.35E-14 | 3.43E-10 | 1.63E-10 | 8.05E-02 | 2.05E-01 | 9.84E-01 |
| 478.9401  | 73.85  | 12.97 | 12.92 | 12.83 | 13.86 | 1.48E-03  | 9.97E-01 | 9.57E-01 | 9.18E-03 | 9.90E-01 | 6.65E-03 | 2.23E-03 |
| 479.00766 | 61.83  | 14.04 | 20.19 | 12.18 | 12.80 | 3.30E-176 | 5.11E-15 | 5.11E-15 | 5.11E-15 | 5.11E-15 | 5.11E-15 | 1.98E-09 |
| 479.08856 | 18.36  | 17.46 | 19.52 | 19.51 | 19.07 | 3.42E-27  | 2.02E-14 | 1.91E-14 | 5.46E-14 | 1.00E+00 | 9.37E-02 | 1.00E-01 |
| 479.18232 | 224.39 | 10.72 | 12.90 | 14.62 | 14.28 | 1.04E-28  | 4.05E-10 | 5.77E-15 | 2.86E-14 | 1.43E-06 | 2.96E-04 | 7.30E-01 |
| 479.28456 | 178.91 | 17.55 | 17.05 | 17.45 | 16.31 | 2.03E-11  | 1.75E-02 | 9.23E-01 | 5.89E-11 | 1.02E-01 | 2.40E-04 | 3.96E-09 |
| 479.29798 | 216.78 | 21.96 | 22.22 | 22.13 | 21.84 | 5.16E-03  | 7.04E-02 | 3.74E-01 | 7.44E-01 | 8.36E-01 | 6.03E-03 | 6.03E-02 |
| 479.31667 | 204.24 | 18.69 | 19.21 | 19.30 | 19.47 | 1.06E-03  | 4.41E-02 | 1.24E-02 | 8.88E-04 | 9.77E-01 | 5.99E-01 | 8.26E-01 |
| 479.33862 | 277.68 | 15.10 | 15.18 | 14.64 | 14.53 | 5.88E-01  | 9.99E-01 | 8.36E-01 | 7.50E-01 | 7.66E-01 | 6.76E-01 | 9.98E-01 |
| 479.91934 | 35.91  | 17.24 | 18.03 | 18.32 | 17.49 | 4.10E-08  | 1.91E-04 | 1.02E-07 | 5.53E-01 | 4.21E-01 | 3.35E-02 | 1.81E-04 |
| 479.94256 | 38.63  | 13.16 | 12.35 | 11.12 | 15.25 | 1.67E-48  | 4.10E-04 | 4.26E-14 | 4.20E-14 | 5.43E-08 | 5.11E-15 | 5.11E-15 |
| 480.01098 | 62.44  | 13.00 | 16.70 | 10.91 | 11.64 | 6.77E-133 | 5.11E-15 | 5.11E-15 | 5.11E-15 | 5.11E-15 | 5.11E-15 | 7.50E-10 |
| 480.07854 | 17.55  | 12.27 | 16.24 | 16.10 | 15.37 | 5.34E-23  | 4.17E-14 | 4.25E-14 | 1.49E-12 | 9.85E-01 | 1.53E-01 | 2.81E-01 |
| 480.09241 | 20.14  | 12.02 | 15.15 | 14.86 | 13.92 | 2.57E-15  | 1.07E-13 | 4.76E-12 | 1.03E-05 | 8.77E-01 | 1.20E-02 | 8.23E-02 |
| 480.27334 | 176.76 | 14.89 | 16.01 | 16.07 | 15.89 | 1.03E-10  | 2.69E-08 | 2.62E-09 | 1.26E-06 | 9.84E-01 | 9.38E-01 | 7.87E-01 |
| 480.29539 | 198.65 | 18.07 | 19.04 | 19.01 | 18.53 | 8.45E-07  | 6.66E-06 | 9.91E-06 | 9.86E-02 | 9.99E-01 | 6.26E-02 | 8.10E-02 |
| 480.31023 | 247.82 | 24.16 | 20.82 | 19.79 | 22.31 | 7.38E-64  | 5.11E-15 | 5.11E-15 | 4.40E-14 | 8.04E-07 | 3.18E-12 | 5.11E-15 |
| 480.32394 | 207.74 | 15.95 | 17.14 | 17.24 | 17.44 | 1.33E-09  | 4.90E-06 | 4.45E-07 | 1.39E-08 | 9.73E-01 | 5.95E-01 | 8.35E-01 |
| 480.71519 | 75.04  | 10.70 | 10.95 | 12.16 | 11.63 | 5.12E-03  | 9.42E-01 | 5.25E-03 | 1.66E-01 | 3.76E-02 | 4.53E-01 | 6.65E-01 |
| 480.73782 | 80.62  | 15.84 | 16.66 | 16.77 | 16.19 | 9.66E-11  | 1.25E-07 | 8.68E-10 | 7.62E-02 | 8.39E-01 | 9.67E-03 | 5.00E-04 |
| 480.80483 | 47.03  | 17.86 | 16.84 | 18.11 | 17.96 | 4.58E-21  | 1.07E-13 | 1.49E-01 | 8.33E-01 | 4.25E-14 | 4.86E-14 | 6.39E-01 |
| 480.81803 | 65.27  | 17.90 | 15.17 | 16.50 | 16.79 | 9.35E-32  | 5.11E-15 | 6.50E-12 | 1.30E-07 | 1.64E-10 | 1.42E-13 | 4.63E-01 |
| 480.87178 | 31.65  | 16.83 | 16.49 | 16.63 | 16.16 | 7.32E-02  | 5.23E-01 | 8.56E-01 | 4.55E-02 | 9.42E-01 | 5.89E-01 | 2.66E-01 |
| 480.93192 | 25.33  | 14.98 | 15.85 | 15.90 | 16.33 | 1.52E-11  | 7.44E-06 | 1.45E-06 | 7.85E-12 | 9.92E-01 | 4.88E-02 | 9.27E-02 |
| 480.94462 | 59.16  | 13.60 | 13.28 | 14.85 | 15.08 | 1.53E-12  | 5.99E-01 | 1.07E-05 | 3.33E-07 | 5.25E-08 | 1.35E-09 | 8.19E-01 |
| 480.9548  | 42.71  | 15.14 | 14.84 | 14.74 | 15.19 | 5.61E-01  | 8.47E-01 | 6.87E-01 | 9.99E-01 | 9.93E-01 | 7.99E-01 | 6.36E-01 |
| 481.00505 | 26.67  | 13.00 | 14.65 | 14.95 | 13.75 | 2.20E-13  | 3.03E-09 | 2.12E-12 | 2.18E-02 | 6.65E-01 | 5.11E-03 | 6.53E-05 |
| 481.23651 | 145.42 | 12.49 | 11.38 | 13.64 | 12.02 | 2.13E-03  | 2.28E-01 | 1.86E-01 | 8.62E-01 | 9.75E-04 | 7.22E-01 | 3.98E-02 |
| 481.25778 | 129.38 | 21.57 | 20.90 | 21.20 | 20.89 | 3.25E-07  | 2.96E-06 | 2.45E-02 | 3.97E-06 | 9.88E-02 | 1.00E+00 | 9.60E-02 |
| 481.2786  | 171.28 | 12.71 | 13.08 | 13.49 | 13.71 | 2.14E-03  | 5.20E-01 | 2.04E-02 | 2.25E-03 | 4.48E-01 | 1.27E-01 | 8.69E-01 |
| 481.30069 | 193.72 | 18.47 | 18.01 | 18.49 | 18.27 | 2.74E-03  | 6.11E-03 | 9.99E-01 | 5.02E-01 | 4.53E-03 | 2.90E-01 | 4.25E-01 |
| 481.30227 | 290.21 | 14.58 | 16.35 | 16.52 | 16.98 | 2.23E-16  | 1.80E-09 | 2.57E-11 | 4.60E-14 | 9.16E-01 | 1.12E-01 | 3.58E-01 |
| 481.31366 | 255.92 | 22.30 | 18.53 | 17.14 | 20.25 | 1.64E-62  | 5.11E-15 | 5.11E-15 | 4.24E-14 | 1.91E-08 | 1.46E-11 | 5.11E-15 |
| 481.35399 | 192.13 | 15.39 | 15.50 | 15.20 | 15.60 | 3.86E-01  | 9.65E-01 | 8.35E-01 | 8.11E-01 | 5.78E-01 | 9.75E-01 | 3.43E-01 |
| 481.85605 | 38.39  | 14.04 | 13.77 | 13.75 | 12.66 | 6.69E-02  | 9.54E-01 | 9.47E-01 | 5.14E-02 | 1.00E+00 | 1.85E-01 | 1.87E-01 |
| 481.86615 | 43.07  | 15.62 | 16.95 | 16.67 | 16.02 | 1.11E-09  | 4.83E-09 | 3.70E-06 | 2.33E-01 | 5.57E-01 | 1.87E-04 | 1.57E-02 |

|           |        |       |       |       |       |           |          |          |          |          |          |          |
|-----------|--------|-------|-------|-------|-------|-----------|----------|----------|----------|----------|----------|----------|
| 481.91514 | 36.51  | 13.81 | 13.46 | 13.13 | 13.52 | 3.63E-01  | 7.84E-01 | 2.74E-01 | 8.71E-01 | 8.39E-01 | 9.99E-01 | 7.72E-01 |
| 481.94136 | 57.87  | 13.28 | 15.03 | 16.72 | 16.07 | 9.74E-29  | 3.42E-09 | 5.11E-15 | 4.26E-14 | 1.97E-08 | 1.65E-03 | 1.00E-01 |
| 482.03119 | 30.75  | 10.51 | 14.13 | 12.32 | 11.13 | 8.52E-12  | 8.47E-12 | 1.08E-03 | 5.98E-01 | 1.66E-03 | 7.63E-08 | 8.55E-02 |
| 482.05981 | 21.27  | 14.27 | 13.65 | 14.23 | 14.02 | 2.17E-01  | 2.12E-01 | 9.99E-01 | 8.71E-01 | 2.90E-01 | 6.88E-01 | 9.27E-01 |
| 482.10467 | 19.45  | 16.42 | 17.87 | 17.69 | 18.54 | 3.65E-16  | 3.37E-09 | 2.03E-07 | 4.35E-14 | 8.53E-01 | 2.80E-02 | 2.12E-03 |
| 482.26083 | 132.91 | 19.43 | 18.52 | 18.90 | 18.59 | 8.83E-08  | 2.75E-07 | 5.11E-03 | 4.78E-06 | 1.03E-01 | 9.74E-01 | 2.74E-01 |
| 482.3033  | 187.06 | 16.44 | 15.69 | 16.06 | 16.33 | 1.28E-04  | 1.01E-04 | 1.16E-01 | 9.22E-01 | 1.45E-01 | 2.60E-03 | 4.38E-01 |
| 482.31472 | 206.26 | 17.80 | 16.77 | 16.12 | 15.62 | 7.41E-17  | 8.06E-05 | 2.55E-11 | 4.31E-14 | 3.16E-02 | 2.97E-05 | 1.82E-01 |
| 482.73591 | 93.36  | 13.67 | 13.76 | 13.72 | 13.18 | 1.30E-01  | 9.82E-01 | 9.97E-01 | 2.58E-01 | 9.98E-01 | 1.43E-01 | 1.94E-01 |
| 482.75423 | 84.29  | 17.11 | 17.25 | 17.13 | 16.98 | 3.34E-01  | 7.47E-01 | 1.00E+00 | 7.83E-01 | 8.17E-01 | 2.45E-01 | 7.33E-01 |
| 482.80355 | 56.36  | 15.37 | 13.53 | 15.87 | 15.09 | 1.69E-19  | 2.13E-13 | 1.09E-01 | 6.24E-01 | 4.14E-14 | 2.40E-09 | 5.62E-03 |
| 482.81575 | 61.04  | 14.85 | 11.88 | 13.37 | 12.46 | 5.54E-20  | 4.20E-14 | 3.75E-06 | 4.92E-13 | 6.28E-06 | 2.30E-01 | 1.68E-02 |
| 482.84805 | 36.73  | 14.00 | 15.38 | 15.37 | 15.15 | 5.06E-15  | 2.05E-12 | 1.94E-12 | 1.20E-08 | 1.00E+00 | 5.91E-01 | 6.22E-01 |
| 482.86837 | 32.25  | 14.67 | 14.47 | 15.67 | 13.51 | 2.58E-06  | 9.47E-01 | 3.51E-02 | 1.29E-02 | 9.09E-03 | 6.85E-02 | 4.06E-07 |
| 482.89068 | 48.97  | 17.44 | 18.95 | 18.94 | 18.91 | 1.24E-34  | 5.33E-15 | 5.11E-15 | 7.33E-15 | 1.00E+00 | 9.83E-01 | 9.91E-01 |
| 482.91319 | 45.83  | 19.05 | 20.58 | 20.58 | 20.62 | 1.87E-24  | 4.40E-14 | 4.46E-14 | 4.22E-14 | 1.00E+00 | 9.92E-01 | 9.94E-01 |
| 483.01736 | 61.74  | 13.27 | 21.26 | 11.25 | 11.84 | 7.70E-145 | 5.11E-15 | 5.33E-15 | 5.82E-14 | 5.11E-15 | 5.11E-15 | 3.25E-03 |
| 483.10788 | 20.83  | 11.72 | 13.76 | 13.79 | 14.78 | 6.49E-08  | 2.72E-04 | 1.77E-04 | 3.27E-08 | 1.00E+00 | 2.03E-01 | 2.21E-01 |
| 483.25973 | 153.21 | 14.33 | 13.59 | 13.45 | 15.05 | 5.03E-03  | 3.96E-01 | 2.35E-01 | 4.34E-01 | 9.91E-01 | 1.79E-02 | 6.77E-03 |
| 483.27358 | 170.73 | 25.04 | 24.58 | 24.89 | 24.32 | 3.75E-08  | 8.89E-04 | 5.86E-01 | 6.00E-08 | 5.61E-02 | 1.42E-01 | 3.43E-05 |
| 483.87176 | 37.62  | 16.45 | 16.35 | 16.86 | 15.61 | 6.17E-03  | 9.92E-01 | 5.96E-01 | 7.36E-02 | 4.44E-01 | 1.57E-01 | 2.44E-03 |
| 483.88567 | 33.6   | 13.45 | 12.98 | 11.62 | 14.26 | 1.34E-07  | 6.72E-01 | 1.02E-04 | 2.38E-01 | 9.74E-03 | 2.11E-02 | 4.62E-08 |
| 483.91657 | 44.57  | 14.86 | 16.35 | 16.30 | 16.39 | 1.35E-17  | 2.01E-13 | 6.43E-13 | 1.87E-13 | 9.92E-01 | 9.96E-01 | 9.60E-01 |
| 483.96562 | 52.21  | 13.46 | 10.25 | 13.40 | 13.78 | 4.09E-19  | 5.08E-14 | 9.99E-01 | 8.34E-01 | 1.00E-13 | 4.31E-14 | 7.67E-01 |
| 484.02109 | 62.18  | 14.47 | 18.17 | 12.92 | 13.42 | 1.22E-150 | 5.11E-15 | 5.11E-15 | 5.11E-15 | 5.11E-15 | 5.11E-15 | 3.10E-08 |
| 484.07291 | 17.49  | 12.32 | 14.25 | 13.30 | 13.78 | 4.22E-03  | 2.53E-03 | 2.69E-01 | 4.47E-02 | 3.11E-01 | 8.47E-01 | 8.24E-01 |
| 484.27696 | 163.48 | 23.07 | 22.53 | 22.80 | 22.32 | 1.02E-08  | 3.24E-05 | 8.13E-02 | 1.01E-08 | 1.15E-01 | 3.25E-01 | 7.22E-04 |
| 484.32864 | 195.75 | 18.17 | 19.62 | 19.05 | 18.39 | 3.56E-12  | 1.53E-11 | 4.89E-05 | 6.91E-01 | 2.54E-02 | 5.84E-08 | 7.37E-03 |
| 484.36484 | 209.59 | 12.82 | 16.33 | 16.19 | 15.11 | 2.81E-36  | 5.11E-15 | 5.11E-15 | 4.35E-14 | 9.49E-01 | 3.44E-05 | 2.69E-04 |
| 484.75055 | 88.08  | 14.48 | 14.14 | 14.31 | 13.30 | 1.02E-04  | 5.46E-01 | 9.11E-01 | 6.78E-05 | 9.13E-01 | 1.14E-02 | 1.17E-03 |
| 484.82725 | 64.64  | 15.91 | 15.33 | 16.24 | 16.05 | 1.41E-08  | 3.36E-04 | 7.62E-02 | 7.59E-01 | 6.60E-09 | 1.42E-05 | 5.46E-01 |
| 484.82951 | 154.78 | 14.60 | 9.92  | 9.92  | 12.66 | 6.59E-20  | 4.26E-14 | 4.26E-14 | 1.74E-03 | 1.00E+00 | 6.12E-06 | 4.92E-06 |
| 484.8508  | 50     | 19.82 | 19.75 | 19.85 | 20.00 | 5.58E-02  | 8.49E-01 | 9.86E-01 | 1.84E-01 | 6.73E-01 | 3.40E-02 | 3.49E-01 |
| 484.8715  | 40.92  | 21.05 | 23.20 | 23.24 | 23.09 | 2.24E-42  | 5.11E-15 | 5.11E-15 | 5.11E-15 | 9.94E-01 | 8.87E-01 | 7.59E-01 |
| 484.90927 | 44.97  | 16.29 | 15.32 | 15.51 | 16.03 | 8.59E-03  | 1.16E-02 | 5.80E-02 | 8.50E-01 | 9.37E-01 | 1.40E-01 | 3.79E-01 |
| 484.95498 | 59.36  | 16.83 | 19.07 | 16.23 | 16.35 | 8.80E-111 | 5.11E-15 | 4.24E-14 | 6.37E-10 | 5.11E-15 | 5.11E-15 | 2.97E-01 |
| 484.99365 | 28.65  | 11.90 | 14.13 | 13.61 | 13.89 | 7.29E-09  | 3.46E-08 | 2.87E-05 | 1.93E-06 | 5.07E-01 | 9.26E-01 | 8.84E-01 |
| 485.01495 | 62.95  | 12.12 | 18.11 | 10.33 | 10.82 | 9.15E-110 | 5.11E-15 | 4.42E-14 | 7.51E-10 | 5.11E-15 | 5.11E-15 | 6.68E-02 |
| 485.07604 | 17.9   | 12.41 | 14.37 | 12.37 | 13.07 | 1.68E-03  | 3.11E-03 | 1.00E+00 | 6.57E-01 | 3.11E-03 | 1.27E-01 | 6.28E-01 |
| 485.13434 | 68.38  | 14.17 | 10.80 | 13.72 | 14.97 | 9.03E-22  | 4.25E-14 | 6.15E-01 | 1.58E-01 | 3.69E-12 | 3.65E-14 | 8.25E-03 |
| 485.24962 | 187.1  | 15.12 | 14.42 | 14.60 | 14.41 | 1.16E-02  | 2.06E-02 | 1.28E-01 | 2.31E-02 | 8.89E-01 | 1.00E+00 | 8.82E-01 |
| 485.26812 | 167.68 | 10.96 | 16.14 | 15.09 | 15.77 | 2.78E-21  | 4.24E-14 | 4.96E-13 | 4.40E-14 | 2.06E-01 | 9.13E-01 | 5.97E-01 |
| 485.27935 | 163.41 | 20.59 | 19.96 | 20.25 | 19.90 | 4.46E-08  | 1.86E-06 | 1.89E-02 | 2.82E-07 | 9.70E-02 | 9.59E-01 | 3.10E-02 |
| 485.3319  | 196.66 | 15.82 | 17.52 | 16.81 | 16.09 | 7.72E-09  | 1.24E-08 | 1.64E-03 | 7.62E-01 | 5.49E-02 | 7.80E-06 | 5.85E-02 |
| 485.34916 | 256.75 | 15.77 | 16.31 | 15.91 | 15.56 | 1.58E-01  | 3.36E-01 | 9.72E-01 | 9.16E-01 | 6.13E-01 | 1.20E-01 | 7.21E-01 |

|           |        |       |       |       |       |           |          |          |          |          |          |          |
|-----------|--------|-------|-------|-------|-------|-----------|----------|----------|----------|----------|----------|----------|
| 485.75161 | 187.1  | 13.51 | 12.08 | 12.61 | 12.99 | 2.27E-04  | 8.94E-05 | 2.79E-02 | 4.03E-01 | 3.74E-01 | 3.98E-02 | 6.75E-01 |
| 485.85388 | 54.47  | 14.52 | 13.40 | 13.61 | 13.82 | 1.00E-05  | 8.98E-06 | 3.81E-04 | 1.61E-02 | 8.07E-01 | 2.88E-01 | 7.96E-01 |
| 485.8748  | 41.14  | 16.39 | 19.30 | 19.38 | 19.22 | 5.26E-37  | 5.11E-15 | 5.11E-15 | 5.33E-15 | 9.84E-01 | 9.86E-01 | 8.98E-01 |
| 485.88543 | 33.1   | 14.91 | 15.86 | 16.03 | 15.64 | 5.45E-10  | 3.04E-07 | 1.10E-09 | 1.93E-04 | 7.71E-01 | 6.10E-01 | 1.33E-01 |
| 485.90303 | 36.71  | 10.68 | 12.48 | 12.87 | 12.24 | 1.86E-06  | 1.65E-04 | 1.94E-06 | 2.09E-03 | 7.92E-01 | 9.50E-01 | 4.74E-01 |
| 485.95707 | 40.33  | 15.36 | 18.71 | 19.01 | 17.72 | 8.11E-60  | 5.11E-15 | 5.11E-15 | 5.11E-15 | 3.14E-01 | 6.41E-07 | 4.94E-11 |
| 485.98699 | 25.57  | 15.33 | 17.46 | 17.79 | 17.26 | 5.02E-18  | 8.43E-13 | 4.26E-14 | 2.04E-10 | 6.16E-01 | 8.98E-01 | 2.35E-01 |
| 486.1166  | 22.92  | 12.55 | 13.73 | 14.50 | 14.42 | 2.67E-06  | 1.66E-02 | 7.73E-06 | 4.14E-05 | 2.27E-01 | 3.53E-01 | 9.97E-01 |
| 486.2574  | 192.35 | 14.16 | 14.28 | 14.07 | 14.25 | 9.50E-01  | 9.90E-01 | 9.95E-01 | 9.95E-01 | 9.50E-01 | 1.00E+00 | 9.66E-01 |
| 486.27115 | 167.5  | 9.33  | 13.77 | 13.47 | 13.41 | 2.48E-20  | 4.15E-14 | 4.51E-14 | 9.50E-14 | 9.24E-01 | 8.87E-01 | 9.99E-01 |
| 486.28196 | 170.82 | 17.63 | 16.89 | 17.17 | 16.92 | 1.11E-09  | 1.01E-08 | 5.84E-04 | 8.86E-08 | 9.66E-02 | 9.95E-01 | 1.83E-01 |
| 486.29974 | 215.7  | 14.37 | 14.48 | 14.74 | 14.89 | 2.71E-01  | 9.82E-01 | 5.52E-01 | 2.81E-01 | 7.99E-01 | 5.11E-01 | 9.58E-01 |
| 486.34439 | 227.52 | 18.54 | 16.87 | 16.00 | 16.50 | 1.96E-13  | 2.25E-06 | 2.94E-13 | 1.14E-08 | 3.56E-02 | 6.70E-01 | 4.34E-01 |
| 486.76176 | 79.94  | 14.01 | 9.79  | 10.82 | 11.26 | 5.61E-22  | 2.86E-14 | 9.04E-14 | 2.40E-10 | 4.74E-02 | 2.18E-03 | 6.96E-01 |
| 486.78811 | 65.71  | 17.29 | 17.03 | 17.92 | 17.53 | 1.52E-12  | 9.25E-02 | 1.37E-07 | 1.56E-01 | 7.34E-13 | 1.76E-04 | 3.99E-03 |
| 486.80887 | 48.7   | 22.38 | 22.71 | 23.22 | 23.03 | 3.98E-31  | 2.61E-06 | 5.11E-15 | 4.19E-14 | 3.11E-13 | 1.18E-05 | 1.84E-02 |
| 486.8464  | 149.81 | 15.08 | 10.62 | 9.49  | 12.41 | 7.65E-29  | 4.24E-14 | 5.11E-15 | 6.40E-08 | 5.76E-02 | 7.77E-04 | 5.88E-09 |
| 486.86774 | 47.28  | 19.68 | 20.66 | 20.79 | 20.76 | 5.27E-37  | 6.22E-15 | 5.11E-15 | 5.11E-15 | 3.86E-01 | 6.11E-01 | 9.89E-01 |
| 486.95319 | 69.33  | 11.19 | 16.61 | 10.07 | 10.38 | 2.28E-85  | 5.11E-15 | 2.30E-06 | 1.62E-03 | 5.11E-15 | 5.11E-15 | 5.38E-01 |
| 486.9713  | 63.87  | 13.76 | 20.18 | 11.42 | 12.33 | 2.21E-117 | 5.11E-15 | 5.77E-15 | 2.18E-11 | 5.11E-15 | 5.11E-15 | 4.23E-05 |
| 487.06594 | 20.06  | 14.51 | 18.43 | 17.85 | 17.17 | 6.72E-30  | 5.11E-15 | 2.58E-14 | 6.14E-14 | 2.40E-01 | 6.08E-04 | 1.41E-01 |
| 487.15139 | 87.11  | 14.82 | 15.19 | 17.21 | 17.20 | 8.03E-16  | 6.68E-01 | 1.64E-11 | 8.93E-11 | 3.17E-08 | 1.04E-07 | 1.00E+00 |
| 487.28413 | 168.47 | 14.08 | 13.91 | 14.47 | 14.16 | 4.05E-01  | 9.55E-01 | 6.22E-01 | 9.95E-01 | 3.37E-01 | 8.88E-01 | 8.00E-01 |
| 487.30601 | 169.97 | 13.56 | 13.34 | 13.54 | 14.11 | 4.05E-02  | 8.32E-01 | 1.00E+00 | 1.67E-01 | 8.87E-01 | 2.72E-02 | 1.47E-01 |
| 487.34725 | 212.57 | 16.09 | 14.99 | 11.84 | 12.83 | 4.12E-15  | 1.46E-01 | 1.04E-13 | 1.97E-08 | 5.32E-08 | 5.44E-04 | 2.65E-01 |
| 487.81228 | 55.93  | 18.24 | 18.42 | 19.12 | 18.90 | 2.67E-29  | 6.81E-02 | 5.77E-15 | 4.46E-14 | 4.32E-14 | 7.58E-09 | 1.59E-02 |
| 487.86197 | 23.03  | 12.44 | 11.63 | 13.23 | 12.74 | 5.60E-02  | 4.92E-01 | 5.03E-01 | 9.54E-01 | 3.33E-02 | 2.55E-01 | 8.48E-01 |
| 487.87172 | 47.32  | 14.99 | 15.90 | 15.94 | 15.94 | 2.34E-17  | 1.44E-12 | 1.14E-13 | 5.64E-13 | 9.79E-01 | 9.85E-01 | 1.00E+00 |
| 487.9721  | 64.77  | 12.28 | 16.63 | 11.57 | 12.75 | 7.79E-29  | 2.55E-14 | 2.60E-01 | 6.49E-01 | 5.33E-15 | 4.13E-14 | 2.24E-02 |
| 488.01939 | 22.05  | 12.76 | 16.56 | 16.36 | 15.47 | 1.93E-42  | 5.11E-15 | 5.11E-15 | 2.60E-14 | 8.53E-01 | 1.52E-04 | 2.64E-03 |
| 488.15473 | 85.81  | 11.26 | 11.26 | 13.93 | 13.81 | 2.55E-12  | 1.00E+00 | 2.94E-08 | 3.29E-07 | 7.86E-08 | 7.37E-07 | 9.95E-01 |
| 488.22753 | 94.23  | 8.57  | 13.28 | 10.75 | 9.54  | 1.48E-19  | 4.06E-14 | 1.67E-05 | 1.68E-01 | 9.06E-07 | 1.99E-12 | 5.84E-02 |
| 488.31538 | 241.35 | 16.30 | 15.69 | 15.40 | 15.30 | 3.62E-03  | 1.59E-01 | 1.07E-02 | 5.32E-03 | 7.58E-01 | 5.83E-01 | 9.89E-01 |
| 488.3599  | 187.66 | 12.94 | 16.25 | 16.08 | 14.84 | 4.80E-61  | 5.11E-15 | 5.11E-15 | 7.55E-15 | 6.90E-01 | 4.86E-14 | 4.09E-12 |
| 488.74631 | 69.82  | 18.01 | 18.71 | 19.40 | 18.94 | 5.33E-16  | 3.15E-05 | 4.42E-14 | 4.53E-08 | 6.73E-05 | 4.85E-01 | 1.87E-02 |
| 488.76725 | 69.82  | 15.72 | 15.99 | 17.03 | 16.57 | 2.55E-16  | 2.75E-01 | 4.29E-14 | 4.65E-07 | 4.31E-10 | 1.55E-03 | 1.81E-02 |
| 488.78569 | 72.85  | 15.50 | 14.37 | 15.65 | 15.28 | 6.17E-17  | 3.23E-13 | 6.75E-01 | 4.55E-01 | 4.35E-14 | 1.54E-08 | 6.09E-02 |
| 488.8081  | 51.31  | 20.54 | 20.75 | 21.35 | 21.14 | 7.34E-42  | 1.78E-04 | 5.11E-15 | 1.02E-14 | 1.09E-14 | 1.56E-11 | 6.17E-04 |
| 488.82435 | 47.08  | 21.31 | 22.13 | 22.59 | 22.37 | 5.33E-53  | 5.11E-15 | 5.11E-15 | 5.11E-15 | 1.63E-10 | 2.67E-03 | 6.78E-03 |
| 488.86263 | 47.87  | 17.33 | 17.29 | 17.46 | 17.65 | 4.51E-02  | 9.92E-01 | 7.66E-01 | 7.73E-02 | 6.16E-01 | 4.67E-02 | 4.70E-01 |
| 488.87924 | 36.81  | 14.08 | 13.27 | 13.96 | 14.21 | 1.45E-02  | 3.56E-02 | 9.75E-01 | 9.74E-01 | 1.13E-01 | 1.63E-02 | 8.46E-01 |
| 488.94112 | 25.06  | 15.63 | 16.14 | 16.29 | 16.66 | 1.85E-03  | 2.07E-01 | 5.09E-02 | 7.55E-04 | 9.36E-01 | 2.19E-01 | 5.17E-01 |
| 488.96889 | 66.81  | 14.62 | 17.62 | 13.21 | 13.66 | 1.37E-141 | 5.11E-15 | 5.11E-15 | 5.11E-15 | 5.11E-15 | 5.11E-15 | 4.42E-08 |
| 488.98861 | 48.36  | 13.60 | 12.81 | 13.71 | 13.15 | 2.35E-02  | 6.25E-02 | 9.88E-01 | 5.06E-01 | 3.08E-02 | 7.39E-01 | 3.39E-01 |
| 489.04315 | 18.68  | 15.74 | 16.02 | 15.96 | 16.73 | 6.12E-02  | 8.65E-01 | 9.25E-01 | 4.06E-02 | 9.99E-01 | 2.49E-01 | 1.81E-01 |

|           |        |       |       |       |       |           |          |          |          |          |          |          |
|-----------|--------|-------|-------|-------|-------|-----------|----------|----------|----------|----------|----------|----------|
| 489.21305 | 63.39  | 13.71 | 23.87 | 11.38 | 12.07 | 8.64E-146 | 5.11E-15 | 1.09E-14 | 6.81E-13 | 5.11E-15 | 5.11E-15 | 6.54E-03 |
| 489.27827 | 184.88 | 19.20 | 20.97 | 21.99 | 20.67 | 1.27E-53  | 5.11E-15 | 5.11E-15 | 2.91E-14 | 3.63E-12 | 1.40E-01 | 4.37E-14 |
| 489.32273 | 243.72 | 16.66 | 14.12 | 14.55 | 15.49 | 3.46E-10  | 8.44E-10 | 3.25E-07 | 1.50E-02 | 6.69E-01 | 3.74E-03 | 8.56E-02 |
| 489.74955 | 70.46  | 12.16 | 9.89  | 12.12 | 10.98 | 4.62E-17  | 5.06E-14 | 9.99E-01 | 1.12E-04 | 1.09E-13 | 6.94E-04 | 2.76E-04 |
| 489.8102  | 56.89  | 15.83 | 15.17 | 16.52 | 16.32 | 4.64E-41  | 1.78E-13 | 5.51E-14 | 6.35E-08 | 5.11E-15 | 5.11E-15 | 1.06E-01 |
| 489.82801 | 54     | 17.03 | 17.76 | 18.41 | 18.11 | 5.43E-47  | 4.43E-14 | 5.11E-15 | 5.11E-15 | 6.62E-14 | 1.30E-04 | 7.65E-04 |
| 489.90601 | 58.06  | 13.28 | 14.42 | 14.35 | 14.34 | 2.25E-04  | 9.11E-04 | 1.80E-03 | 3.47E-03 | 9.97E-01 | 9.93E-01 | 1.00E+00 |
| 489.98621 | 50.76  | 13.41 | 16.29 | 16.51 | 15.02 | 8.12E-28  | 2.69E-14 | 7.77E-15 | 5.02E-08 | 8.43E-01 | 4.31E-05 | 8.53E-07 |
| 490.21654 | 56.45  | 19.86 | 21.57 | 19.43 | 19.49 | 2.44E-88  | 5.11E-15 | 6.97E-09 | 1.14E-06 | 5.11E-15 | 5.11E-15 | 8.79E-01 |
| 490.28153 | 184.64 | 17.42 | 19.11 | 20.17 | 18.86 | 5.84E-52  | 5.11E-15 | 5.11E-15 | 3.90E-14 | 8.62E-13 | 2.60E-01 | 4.35E-14 |
| 490.30307 | 293.15 | 18.58 | 16.77 | 16.45 | 17.73 | 4.48E-29  | 3.71E-14 | 5.33E-15 | 1.73E-05 | 2.52E-01 | 1.58E-06 | 7.03E-11 |
| 490.74461 | 70.52  | 16.60 | 16.86 | 17.97 | 17.31 | 8.64E-19  | 2.40E-01 | 4.29E-14 | 9.97E-06 | 1.85E-12 | 1.55E-02 | 5.35E-05 |
| 490.76198 | 64.13  | 18.90 | 19.15 | 20.11 | 19.73 | 1.96E-17  | 2.45E-01 | 4.34E-14 | 3.53E-08 | 1.46E-10 | 3.07E-04 | 3.64E-02 |
| 490.80429 | 51.18  | 16.58 | 15.65 | 17.14 | 17.00 | 4.33E-42  | 3.97E-14 | 4.62E-09 | 3.20E-05 | 5.11E-15 | 5.11E-15 | 4.28E-01 |
| 490.82191 | 49.42  | 19.85 | 20.37 | 20.94 | 20.67 | 1.67E-35  | 5.33E-11 | 5.11E-15 | 2.51E-14 | 3.51E-12 | 5.87E-04 | 3.34E-03 |
| 490.8375  | 38.73  | 18.18 | 19.31 | 19.48 | 19.41 | 1.59E-30  | 3.66E-14 | 5.77E-15 | 2.04E-14 | 3.98E-01 | 8.11E-01 | 9.20E-01 |
| 490.85484 | 38.15  | 13.36 | 11.08 | 13.28 | 11.47 | 2.49E-07  | 1.40E-05 | 9.98E-01 | 6.62E-04 | 4.39E-05 | 8.66E-01 | 1.57E-03 |
| 490.87901 | 49.92  | 15.04 | 11.96 | 11.20 | 12.99 | 3.47E-06  | 2.79E-04 | 2.53E-06 | 3.87E-02 | 7.51E-01 | 5.52E-01 | 1.00E-01 |
| 490.90046 | 37.71  | 17.82 | 19.83 | 19.42 | 19.56 | 4.03E-16  | 5.40E-14 | 4.03E-10 | 5.25E-11 | 3.04E-01 | 6.80E-01 | 9.40E-01 |
| 490.94114 | 33.17  | 15.28 | 14.22 | 14.02 | 14.72 | 4.36E-04  | 5.25E-03 | 4.55E-04 | 3.14E-01 | 9.24E-01 | 4.40E-01 | 1.50E-01 |
| 491.02723 | 49.48  | 14.02 | 18.38 | 10.80 | 11.49 | 2.50E-75  | 5.11E-15 | 8.66E-15 | 4.33E-14 | 5.11E-15 | 5.11E-15 | 7.55E-02 |
| 491.193   | 172.21 | 13.21 | 12.64 | 13.49 | 12.80 | 6.58E-04  | 4.25E-02 | 5.69E-01 | 2.49E-01 | 8.80E-04 | 8.95E-01 | 1.37E-02 |
| 491.21053 | 64.61  | 14.33 | 19.46 | 12.59 | 13.12 | 6.93E-139 | 5.11E-15 | 5.11E-15 | 4.25E-14 | 5.11E-15 | 5.11E-15 | 1.50E-04 |
| 491.22063 | 64.6   | 15.19 | 16.37 | 14.15 | 14.48 | 5.99E-86  | 5.11E-15 | 5.11E-15 | 4.11E-14 | 5.11E-15 | 5.11E-15 | 4.75E-05 |
| 491.2843  | 185.2  | 14.89 | 16.38 | 17.51 | 16.05 | 5.98E-38  | 4.41E-14 | 5.11E-15 | 9.08E-11 | 2.56E-10 | 2.20E-01 | 4.73E-14 |
| 491.30308 | 237.47 | 15.10 | 14.92 | 15.50 | 15.73 | 2.86E-01  | 9.79E-01 | 7.90E-01 | 4.98E-01 | 5.71E-01 | 3.05E-01 | 9.59E-01 |
| 491.32071 | 204.31 | 16.80 | 17.26 | 17.41 | 17.34 | 1.57E-02  | 1.17E-01 | 1.64E-02 | 5.90E-02 | 8.92E-01 | 9.87E-01 | 9.85E-01 |
| 491.33874 | 254.82 | 14.82 | 14.27 | 14.58 | 14.23 | 7.86E-01  | 8.32E-01 | 9.83E-01 | 8.11E-01 | 9.65E-01 | 1.00E+00 | 9.54E-01 |
| 491.76528 | 68.03  | 13.63 | 10.94 | 14.31 | 13.45 | 9.12E-31  | 2.71E-14 | 2.89E-02 | 8.75E-01 | 5.11E-15 | 4.26E-14 | 4.69E-03 |
| 491.82574 | 54.13  | 14.91 | 14.91 | 15.78 | 15.74 | 3.25E-25  | 1.00E+00 | 4.40E-14 | 4.95E-14 | 4.26E-14 | 7.26E-14 | 9.72E-01 |
| 491.92357 | 64.74  | 12.30 | 12.48 | 13.80 | 14.52 | 1.83E-17  | 8.77E-01 | 3.97E-08 | 5.11E-14 | 3.83E-06 | 3.43E-12 | 3.44E-02 |
| 491.93426 | 27.6   | 16.91 | 14.29 | 13.59 | 14.54 | 2.07E-13  | 1.09E-08 | 3.86E-13 | 5.56E-07 | 3.53E-01 | 9.39E-01 | 1.29E-01 |
| 491.96478 | 26.67  | 10.06 | 14.30 | 14.63 | 12.75 | 5.74E-37  | 5.11E-15 | 5.11E-15 | 1.08E-13 | 7.38E-01 | 3.17E-05 | 2.30E-07 |
| 492.18169 | 174.37 | 13.00 | 7.75  | 8.89  | 8.77  | 4.65E-29  | 5.33E-15 | 4.37E-14 | 4.14E-14 | 3.94E-02 | 9.38E-02 | 9.94E-01 |
| 492.21453 | 64.85  | 15.36 | 16.80 | 14.37 | 14.67 | 6.75E-83  | 5.11E-15 | 5.11E-15 | 4.95E-14 | 5.11E-15 | 5.11E-15 | 1.90E-03 |
| 492.28714 | 184.41 | 9.06  | 10.37 | 12.91 | 9.98  | 7.52E-26  | 2.33E-04 | 5.77E-15 | 2.47E-02 | 7.94E-13 | 6.25E-01 | 4.44E-14 |
| 492.30954 | 206.58 | 14.43 | 13.59 | 11.80 | 13.46 | 1.79E-04  | 4.82E-01 | 5.33E-05 | 3.73E-01 | 1.53E-02 | 9.96E-01 | 3.52E-02 |
| 492.32377 | 204.27 | 14.02 | 14.81 | 15.05 | 14.89 | 1.67E-02  | 1.07E-01 | 1.62E-02 | 7.42E-02 | 9.07E-01 | 9.97E-01 | 9.70E-01 |
| 492.34542 | 211.01 | 15.95 | 14.14 | 13.82 | 14.43 | 4.61E-05  | 9.71E-04 | 5.28E-05 | 1.02E-02 | 9.10E-01 | 9.41E-01 | 6.13E-01 |
| 492.74258 | 73.56  | 11.91 | 10.12 | 13.11 | 13.04 | 6.21E-15  | 9.05E-06 | 5.00E-03 | 1.34E-02 | 2.60E-13 | 3.63E-12 | 9.98E-01 |
| 492.75784 | 57.26  | 17.56 | 16.22 | 18.24 | 17.86 | 2.82E-34  | 4.12E-14 | 4.56E-06 | 1.35E-01 | 5.11E-15 | 1.44E-14 | 3.80E-02 |
| 492.81735 | 53.25  | 16.80 | 16.51 | 17.22 | 16.57 | 1.12E-03  | 3.84E-01 | 1.10E-01 | 6.31E-01 | 1.25E-03 | 9.85E-01 | 5.88E-03 |
| 492.83729 | 38.66  | 17.80 | 17.81 | 17.20 | 17.72 | 1.71E-04  | 1.00E+00 | 5.11E-04 | 9.52E-01 | 6.73E-04 | 9.45E-01 | 6.91E-03 |
| 492.85832 | 54.49  | 16.45 | 16.10 | 17.27 | 17.09 | 1.13E-15  | 6.28E-02 | 5.32E-08 | 5.94E-05 | 1.31E-13 | 7.08E-10 | 6.08E-01 |
| 492.89526 | 40.01  | 14.99 | 15.58 | 14.52 | 15.30 | 5.41E-02  | 4.21E-01 | 6.11E-01 | 8.57E-01 | 3.83E-02 | 9.06E-01 | 2.14E-01 |

|           |        |       |       |       |       |           |          |          |          |          |          |          |
|-----------|--------|-------|-------|-------|-------|-----------|----------|----------|----------|----------|----------|----------|
| 492.97658 | 57.26  | 13.85 | 13.33 | 16.48 | 15.93 | 1.47E-17  | 4.89E-01 | 4.81E-11 | 5.26E-07 | 7.57E-14 | 8.76E-10 | 4.92E-01 |
| 493.00439 | 62.06  | 13.59 | 16.16 | 11.64 | 12.33 | 1.51E-121 | 5.11E-15 | 5.11E-15 | 5.11E-15 | 5.11E-15 | 5.11E-15 | 3.71E-11 |
| 493.02664 | 23.12  | 11.25 | 15.63 | 14.29 | 14.73 | 3.07E-19  | 4.12E-14 | 2.38E-10 | 2.84E-12 | 1.67E-02 | 2.19E-01 | 7.71E-01 |
| 493.05362 | 24.53  | 14.75 | 16.79 | 15.00 | 15.09 | 1.45E-06  | 2.33E-06 | 9.15E-01 | 8.32E-01 | 6.64E-05 | 2.92E-04 | 9.97E-01 |
| 493.15935 | 84.11  | 12.33 | 10.49 | 12.50 | 13.18 | 4.22E-06  | 1.30E-03 | 9.83E-01 | 3.31E-01 | 4.53E-04 | 2.76E-06 | 5.55E-01 |
| 493.19807 | 156.93 | 10.82 | 11.98 | 12.50 | 12.23 | 3.51E-07  | 9.74E-04 | 4.03E-07 | 5.86E-05 | 3.38E-01 | 8.66E-01 | 8.28E-01 |
| 493.26174 | 170.75 | 13.62 | 12.94 | 13.93 | 11.61 | 2.99E-12  | 9.50E-02 | 7.23E-01 | 1.29E-09 | 6.27E-03 | 1.67E-04 | 8.13E-12 |
| 493.30095 | 197.17 | 15.38 | 14.93 | 14.90 | 15.28 | 5.73E-03  | 3.19E-02 | 1.54E-02 | 9.26E-01 | 9.96E-01 | 1.87E-01 | 1.16E-01 |
| 493.30231 | 290.85 | 12.95 | 15.77 | 15.97 | 16.05 | 6.55E-20  | 1.13E-13 | 4.35E-14 | 4.29E-14 | 9.43E-01 | 8.65E-01 | 9.96E-01 |
| 493.33661 | 213.11 | 16.26 | 16.55 | 16.68 | 16.82 | 4.38E-02  | 4.72E-01 | 1.45E-01 | 3.35E-02 | 9.13E-01 | 5.68E-01 | 9.10E-01 |
| 493.92874 | 33.59  | 16.41 | 14.30 | 13.64 | 15.18 | 1.58E-16  | 2.84E-10 | 4.15E-14 | 6.36E-04 | 1.48E-01 | 3.39E-02 | 1.50E-05 |
| 493.99741 | 20.62  | 18.41 | 18.60 | 18.84 | 18.63 | 2.22E-02  | 5.38E-01 | 9.45E-03 | 4.03E-01 | 2.95E-01 | 9.95E-01 | 4.59E-01 |
| 494.03789 | 24.68  | 14.37 | 17.31 | 17.49 | 16.84 | 4.01E-23  | 4.46E-14 | 4.00E-14 | 5.32E-13 | 9.41E-01 | 4.46E-01 | 1.70E-01 |
| 494.09251 | 20.49  | 11.88 | 14.64 | 12.98 | 13.50 | 3.92E-08  | 6.44E-09 | 5.40E-02 | 1.94E-03 | 1.23E-03 | 6.22E-02 | 6.62E-01 |
| 494.14373 | 64.53  | 14.43 | 15.10 | 12.99 | 13.48 | 6.21E-84  | 4.23E-14 | 5.11E-15 | 5.11E-15 | 5.11E-15 | 5.11E-15 | 4.75E-10 |
| 494.25282 | 97.67  | 17.18 | 13.81 | 14.80 | 14.76 | 2.01E-25  | 7.33E-15 | 5.50E-14 | 7.13E-14 | 3.39E-03 | 8.52E-03 | 9.98E-01 |
| 494.28959 | 182.42 | 14.13 | 11.59 | 12.78 | 10.96 | 7.00E-17  | 1.74E-11 | 5.57E-04 | 4.35E-14 | 4.52E-03 | 3.04E-01 | 5.05E-06 |
| 494.32578 | 182.93 | 8.94  | 14.13 | 15.43 | 12.37 | 1.30E-37  | 5.77E-15 | 5.11E-15 | 6.08E-13 | 1.45E-02 | 5.60E-04 | 2.35E-10 |
| 494.33964 | 212.77 | 13.75 | 13.82 | 13.91 | 13.95 | 9.51E-01  | 9.97E-01 | 9.73E-01 | 9.49E-01 | 9.96E-01 | 9.86E-01 | 9.99E-01 |
| 494.7521  | 63.86  | 16.22 | 13.45 | 16.16 | 16.38 | 1.33E-69  | 5.11E-15 | 9.59E-01 | 5.83E-01 | 5.11E-15 | 5.11E-15 | 3.16E-01 |
| 494.77176 | 57.5   | 16.25 | 13.63 | 16.10 | 16.02 | 8.23E-18  | 4.55E-14 | 9.55E-01 | 8.59E-01 | 1.46E-13 | 3.23E-12 | 9.92E-01 |
| 494.81512 | 45.61  | 14.72 | 9.78  | 11.68 | 12.73 | 1.72E-17  | 4.41E-14 | 2.70E-08 | 8.17E-04 | 1.48E-03 | 4.62E-07 | 1.96E-01 |
| 494.83446 | 59.98  | 15.38 | 10.50 | 11.51 | 12.89 | 3.49E-28  | 5.33E-15 | 4.03E-14 | 8.35E-09 | 5.06E-02 | 8.37E-08 | 4.08E-03 |
| 494.85358 | 42.06  | 18.84 | 20.51 | 20.07 | 20.01 | 3.00E-20  | 4.00E-14 | 2.49E-12 | 1.04E-10 | 3.91E-02 | 1.89E-02 | 9.85E-01 |
| 494.91172 | 39.21  | 12.29 | 15.49 | 15.15 | 15.52 | 5.45E-12  | 1.06E-09 | 4.06E-08 | 1.90E-09 | 8.95E-01 | 1.00E+00 | 8.75E-01 |
| 494.971   | 145.09 | 14.75 | 14.45 | 14.54 | 14.55 | 3.84E-01  | 3.29E-01 | 6.29E-01 | 6.86E-01 | 9.59E-01 | 9.52E-01 | 1.00E+00 |
| 494.97185 | 21.96  | 12.43 | 17.53 | 17.52 | 16.20 | 9.66E-23  | 4.26E-14 | 4.13E-14 | 4.12E-11 | 1.00E+00 | 6.61E-02 | 6.39E-02 |
| 495.09938 | 18.5   | 11.51 | 16.64 | 16.88 | 16.61 | 2.29E-36  | 5.11E-15 | 5.11E-15 | 5.77E-15 | 9.39E-01 | 1.00E+00 | 9.17E-01 |
| 495.22102 | 56.63  | 13.78 | 19.20 | 11.68 | 12.38 | 5.41E-129 | 5.11E-15 | 5.11E-15 | 4.41E-14 | 5.11E-15 | 5.11E-15 | 3.39E-05 |
| 495.2731  | 166.28 | 16.77 | 15.88 | 16.39 | 16.27 | 1.03E-11  | 9.27E-13 | 5.16E-03 | 1.40E-04 | 7.39E-05 | 6.73E-03 | 7.15E-01 |
| 495.31819 | 288.36 | 18.77 | 20.96 | 21.39 | 21.37 | 1.44E-38  | 7.77E-15 | 5.11E-15 | 5.11E-15 | 1.08E-01 | 1.44E-01 | 1.00E+00 |
| 495.85667 | 44.17  | 13.74 | 15.16 | 14.44 | 14.79 | 1.13E-05  | 5.21E-06 | 6.13E-02 | 1.79E-03 | 5.89E-02 | 6.02E-01 | 6.19E-01 |
| 495.8929  | 36.54  | 17.38 | 17.67 | 18.25 | 17.20 | 1.29E-03  | 6.88E-01 | 6.59E-03 | 9.15E-01 | 1.55E-01 | 3.37E-01 | 1.31E-03 |
| 495.91547 | 39.82  | 10.53 | 9.49  | 9.23  | 13.48 | 5.16E-44  | 1.43E-04 | 8.53E-07 | 7.77E-15 | 7.18E-01 | 5.11E-15 | 5.11E-15 |
| 495.99267 | 23.51  | 13.76 | 13.85 | 13.86 | 13.28 | 3.74E-01  | 9.93E-01 | 9.92E-01 | 5.55E-01 | 1.00E+00 | 4.19E-01 | 4.08E-01 |
| 496.22455 | 65.64  | 15.17 | 16.42 | 14.03 | 14.38 | 3.83E-73  | 5.11E-15 | 5.11E-15 | 4.53E-14 | 5.11E-15 | 5.11E-15 | 1.23E-03 |
| 496.26834 | 155.63 | 20.63 | 19.87 | 20.19 | 19.95 | 3.88E-08  | 8.77E-08 | 4.27E-03 | 4.40E-06 | 6.96E-02 | 9.26E-01 | 2.90E-01 |
| 496.30499 | 210.37 | 15.21 | 16.55 | 16.75 | 16.07 | 3.08E-05  | 5.19E-04 | 3.74E-05 | 6.60E-02 | 9.38E-01 | 5.19E-01 | 2.11E-01 |
| 496.32121 | 293.62 | 15.13 | 18.99 | 19.05 | 18.50 | 2.30E-28  | 1.95E-14 | 1.27E-14 | 4.35E-14 | 9.98E-01 | 5.34E-01 | 4.24E-01 |
| 496.71236 | 91.1   | 14.56 | 16.23 | 16.10 | 15.64 | 9.67E-17  | 4.86E-14 | 2.84E-13 | 7.99E-07 | 9.10E-01 | 1.89E-02 | 9.75E-02 |
| 496.77115 | 71.26  | 15.71 | 13.69 | 14.42 | 14.18 | 1.10E-26  | 5.77E-15 | 4.31E-13 | 4.13E-14 | 9.60E-05 | 2.44E-02 | 4.87E-01 |
| 496.78302 | 30.12  | 13.57 | 12.47 | 14.15 | 12.48 | 4.25E-06  | 1.36E-02 | 3.73E-01 | 1.78E-02 | 5.07E-05 | 1.00E+00 | 8.64E-05 |
| 496.79102 | 65.99  | 18.33 | 16.94 | 17.44 | 17.45 | 5.37E-13  | 1.46E-13 | 1.34E-06 | 5.30E-06 | 2.32E-02 | 2.28E-02 | 1.00E+00 |
| 496.84754 | 38.48  | 16.81 | 17.89 | 18.22 | 17.46 | 1.63E-12  | 6.74E-08 | 1.45E-12 | 3.05E-03 | 2.94E-01 | 1.23E-01 | 5.98E-04 |
| 496.90634 | 34.25  | 14.82 | 14.67 | 14.27 | 14.79 | 4.82E-03  | 8.07E-01 | 5.43E-03 | 9.99E-01 | 8.75E-02 | 8.98E-01 | 1.55E-02 |



|           |        |       |       |       |       |           |          |          |          |          |          |          |
|-----------|--------|-------|-------|-------|-------|-----------|----------|----------|----------|----------|----------|----------|
| 496.92888 | 45.9   | 17.17 | 17.48 | 17.56 | 17.71 | 1.16E-01  | 5.06E-01 | 3.08E-01 | 8.72E-02 | 9.88E-01 | 7.60E-01 | 9.06E-01 |
| 496.94883 | 34.86  | 13.62 | 15.27 | 15.29 | 15.18 | 8.11E-15  | 1.32E-11 | 6.16E-12 | 4.21E-10 | 1.00E+00 | 9.80E-01 | 9.71E-01 |
| 497.03064 | 42.6   | 14.35 | 17.55 | 12.81 | 13.70 | 9.54E-23  | 3.05E-12 | 1.34E-03 | 4.28E-01 | 2.29E-14 | 4.51E-14 | 1.73E-01 |
| 497.27244 | 155.79 | 18.51 | 17.66 | 18.01 | 17.75 | 2.57E-09  | 7.81E-09 | 1.01E-03 | 5.75E-07 | 6.18E-02 | 9.19E-01 | 2.77E-01 |
| 497.28958 | 178.54 | 17.92 | 16.98 | 17.59 | 17.25 | 4.43E-10  | 3.92E-10 | 7.78E-02 | 1.64E-05 | 1.03E-04 | 2.62E-01 | 7.33E-02 |
| 497.31172 | 208.76 | 11.78 | 12.37 | 12.58 | 13.04 | 2.76E-01  | 7.86E-01 | 5.76E-01 | 2.12E-01 | 9.88E-01 | 7.46E-01 | 8.98E-01 |
| 497.3149  | 291.03 | 13.36 | 15.95 | 15.97 | 15.81 | 5.14E-21  | 4.15E-14 | 4.44E-14 | 6.53E-14 | 1.00E+00 | 9.70E-01 | 9.55E-01 |
| 497.32952 | 193.24 | 15.95 | 15.71 | 15.69 | 15.21 | 2.07E-03  | 5.66E-01 | 4.86E-01 | 7.03E-04 | 9.99E-01 | 5.17E-02 | 6.46E-02 |
| 497.34918 | 166.61 | 14.15 | 13.86 | 14.45 | 14.44 | 1.23E-01  | 7.08E-01 | 6.79E-01 | 7.29E-01 | 1.46E-01 | 1.83E-01 | 1.00E+00 |
| 497.84021 | 58.17  | 14.94 | 14.36 | 15.96 | 15.43 | 1.35E-12  | 1.84E-02 | 2.73E-06 | 7.98E-02 | 6.71E-13 | 3.75E-06 | 5.28E-02 |
| 497.8902  | 37.36  | 14.14 | 13.99 | 14.07 | 13.64 | 6.54E-01  | 9.81E-01 | 9.98E-01 | 6.19E-01 | 9.98E-01 | 8.45E-01 | 7.42E-01 |
| 497.92413 | 35.84  | 12.41 | 13.21 | 13.47 | 13.62 | 2.16E-03  | 8.20E-02 | 8.44E-03 | 3.04E-03 | 8.69E-01 | 6.60E-01 | 9.77E-01 |
| 498.0337  | 20.52  | 13.83 | 15.07 | 14.60 | 13.74 | 3.95E-04  | 2.14E-03 | 1.10E-01 | 9.93E-01 | 5.39E-01 | 1.65E-03 | 7.90E-02 |
| 498.26339 | 184.23 | 19.72 | 19.68 | 20.03 | 19.21 | 1.23E-07  | 9.91E-01 | 5.75E-02 | 7.47E-04 | 3.23E-02 | 3.06E-03 | 1.47E-08 |
| 498.27454 | 156.09 | 15.58 | 13.62 | 14.27 | 14.13 | 1.57E-14  | 5.57E-14 | 1.43E-07 | 2.01E-08 | 3.11E-02 | 1.50E-01 | 9.43E-01 |
| 498.29082 | 22.23  | 17.04 | 16.74 | 14.86 | 17.06 | 2.77E-04  | 9.48E-01 | 7.10E-04 | 1.00E+00 | 7.01E-03 | 9.45E-01 | 1.34E-03 |
| 498.29215 | 177.99 | 15.70 | 14.25 | 15.05 | 14.77 | 1.82E-10  | 3.14E-11 | 6.20E-03 | 4.38E-05 | 6.04E-04 | 7.03E-02 | 5.13E-01 |
| 498.34075 | 193.13 | 15.47 | 16.31 | 15.83 | 14.79 | 1.94E-06  | 7.90E-03 | 5.05E-01 | 6.02E-02 | 2.73E-01 | 6.16E-07 | 1.12E-03 |
| 498.71082 | 77.37  | 9.96  | 12.13 | 12.19 | 11.76 | 1.30E-09  | 8.34E-08 | 2.35E-08 | 2.03E-05 | 9.98E-01 | 7.76E-01 | 6.68E-01 |
| 498.72826 | 75.18  | 15.31 | 16.82 | 16.64 | 16.15 | 5.71E-17  | 4.46E-14 | 6.84E-13 | 1.50E-05 | 7.25E-01 | 1.25E-03 | 3.05E-02 |
| 498.78724 | 69.37  | 15.49 | 14.30 | 15.31 | 14.78 | 1.18E-09  | 3.23E-09 | 7.50E-01 | 1.16E-03 | 1.04E-06 | 6.53E-02 | 3.16E-02 |
| 498.8217  | 41.63  | 13.13 | 14.75 | 14.77 | 14.85 | 8.04E-12  | 1.04E-08 | 5.06E-09 | 2.69E-09 | 1.00E+00 | 9.79E-01 | 9.88E-01 |
| 498.8429  | 35.19  | 14.68 | 14.77 | 15.58 | 14.25 | 1.75E-03  | 9.93E-01 | 3.09E-02 | 5.79E-01 | 7.55E-02 | 4.42E-01 | 8.10E-04 |
| 498.86528 | 38.82  | 17.97 | 18.98 | 19.12 | 19.02 | 7.51E-28  | 4.20E-14 | 1.04E-14 | 3.93E-14 | 4.68E-01 | 9.73E-01 | 7.60E-01 |
| 498.88712 | 47.59  | 19.99 | 21.24 | 21.34 | 21.31 | 2.83E-30  | 2.73E-14 | 7.77E-15 | 2.02E-14 | 8.31E-01 | 9.48E-01 | 9.92E-01 |
| 498.93112 | 91.98  | 17.83 | 18.42 | 17.06 | 18.50 | 8.29E-12  | 1.77E-02 | 6.39E-04 | 6.68E-03 | 8.96E-10 | 9.82E-01 | 2.59E-10 |
| 498.99158 | 62.51  | 14.14 | 22.01 | 12.29 | 12.83 | 4.58E-161 | 5.11E-15 | 5.11E-15 | 4.34E-14 | 5.11E-15 | 5.11E-15 | 7.60E-04 |
| 499.05301 | 22.6   | 19.79 | 20.18 | 19.83 | 19.53 | 1.04E-01  | 3.85E-01 | 9.99E-01 | 7.40E-01 | 4.93E-01 | 6.30E-02 | 6.64E-01 |
| 499.06276 | 16.87  | 13.87 | 15.58 | 14.50 | 15.16 | 1.59E-06  | 1.37E-06 | 2.01E-01 | 6.67E-04 | 5.82E-03 | 5.98E-01 | 1.99E-01 |
| 499.26674 | 188.57 | 17.72 | 17.66 | 18.05 | 17.13 | 9.83E-09  | 9.64E-01 | 5.72E-02 | 1.16E-04 | 1.94E-02 | 1.11E-03 | 1.15E-09 |
| 499.28415 | 181.57 | 15.56 | 10.75 | 8.61  | 9.06  | 1.53E-58  | 5.11E-15 | 5.11E-15 | 5.11E-15 | 1.05E-08 | 1.66E-05 | 5.77E-01 |
| 499.29506 | 172.99 | 14.30 | 12.92 | 12.98 | 13.66 | 9.40E-07  | 6.14E-06 | 1.32E-05 | 1.04E-01 | 9.97E-01 | 5.68E-02 | 8.83E-02 |
| 499.3075  | 220.74 | 13.00 | 15.11 | 14.92 | 14.68 | 6.11E-03  | 9.12E-03 | 2.00E-02 | 6.72E-02 | 9.92E-01 | 9.29E-01 | 9.86E-01 |
| 499.36505 | 266.94 | 15.73 | 14.98 | 16.04 | 15.44 | 1.39E-01  | 3.54E-01 | 8.99E-01 | 9.25E-01 | 1.04E-01 | 7.73E-01 | 5.85E-01 |
| 499.89058 | 41.12  | 15.39 | 17.03 | 17.25 | 17.23 | 1.43E-22  | 4.96E-14 | 4.15E-14 | 4.53E-14 | 6.58E-01 | 7.32E-01 | 1.00E+00 |
| 499.99519 | 54.69  | 15.27 | 19.07 | 14.23 | 14.54 | 7.28E-170 | 5.11E-15 | 5.11E-15 | 7.77E-15 | 5.11E-15 | 5.11E-15 | 3.55E-06 |
| 500.02347 | 102.76 | 7.13  | 14.48 | 14.25 | 13.87 | 9.91E-47  | 5.11E-15 | 5.11E-15 | 5.11E-15 | 9.59E-01 | 5.69E-01 | 8.48E-01 |
| 500.05318 | 18.67  | 16.24 | 16.15 | 15.71 | 15.99 | 1.70E-01  | 9.82E-01 | 1.42E-01 | 7.52E-01 | 3.17E-01 | 9.27E-01 | 7.17E-01 |
| 500.09523 | 22.63  | 12.40 | 12.97 | 14.75 | 14.18 | 2.20E-13  | 2.48E-01 | 2.32E-12 | 2.79E-07 | 2.53E-07 | 1.32E-03 | 2.92E-01 |
| 500.2671  | 189.04 | 12.85 | 12.55 | 12.35 | 11.06 | 7.92E-06  | 8.09E-01 | 4.50E-01 | 4.33E-06 | 9.42E-01 | 3.14E-04 | 2.20E-03 |
| 500.27892 | 197.42 | 24.07 | 24.03 | 24.17 | 23.53 | 9.14E-07  | 9.74E-01 | 8.16E-01 | 3.20E-05 | 5.82E-01 | 2.99E-04 | 9.98E-07 |
| 500.36022 | 224.78 | 16.33 | 14.49 | 10.99 | 12.13 | 1.81E-19  | 4.74E-03 | 4.33E-14 | 9.84E-12 | 1.13E-08 | 3.59E-04 | 1.92E-01 |
| 500.72313 | 88.98  | 14.20 | 12.83 | 12.93 | 13.09 | 4.04E-06  | 1.78E-05 | 6.52E-05 | 1.06E-03 | 9.87E-01 | 8.33E-01 | 9.52E-01 |
| 500.80365 | 148.26 | 15.34 | 12.42 | 13.31 | 14.17 | 5.79E-27  | 5.33E-15 | 4.31E-14 | 9.29E-06 | 1.34E-03 | 7.80E-11 | 2.56E-03 |
| 500.82473 | 51.25  | 19.99 | 19.39 | 19.79 | 20.12 | 8.27E-15  | 4.52E-11 | 6.64E-02 | 4.00E-01 | 2.85E-05 | 8.10E-14 | 7.84E-04 |

|           |        |       |       |       |       |           |          |          |          |          |          |          |
|-----------|--------|-------|-------|-------|-------|-----------|----------|----------|----------|----------|----------|----------|
| 500.84948 | 40.75  | 21.38 | 23.21 | 23.42 | 23.22 | 3.09E-44  | 5.11E-15 | 5.11E-15 | 5.11E-15 | 3.75E-01 | 1.00E+00 | 4.45E-01 |
| 500.86304 | 41.28  | 15.10 | 12.64 | 13.65 | 13.96 | 9.13E-08  | 1.30E-08 | 1.44E-03 | 2.58E-02 | 6.13E-02 | 9.53E-03 | 8.79E-01 |
| 500.88399 | 45.26  | 17.54 | 18.27 | 18.35 | 18.56 | 3.02E-19  | 5.83E-11 | 5.31E-13 | 4.29E-14 | 8.99E-01 | 4.37E-02 | 1.97E-01 |
| 500.98954 | 62.4   | 16.60 | 19.61 | 15.99 | 16.14 | 4.26E-160 | 5.11E-15 | 6.22E-15 | 4.40E-14 | 5.11E-15 | 5.11E-15 | 3.16E-02 |
| 501.04843 | 22.85  | 16.85 | 16.98 | 16.62 | 16.18 | 1.02E-01  | 9.81E-01 | 8.77E-01 | 1.77E-01 | 6.88E-01 | 9.03E-02 | 5.69E-01 |
| 501.07057 | 24.73  | 16.66 | 16.95 | 17.35 | 16.87 | 4.35E-03  | 4.04E-01 | 1.75E-03 | 7.09E-01 | 1.80E-01 | 9.72E-01 | 7.58E-02 |
| 501.22448 | 183.69 | 14.66 | 10.45 | 10.15 | 11.50 | 1.18E-39  | 5.11E-15 | 5.11E-15 | 3.96E-14 | 7.67E-01 | 4.97E-03 | 1.28E-04 |
| 501.28228 | 194.37 | 22.19 | 22.11 | 22.26 | 21.66 | 2.96E-06  | 8.85E-01 | 9.14E-01 | 4.23E-05 | 5.32E-01 | 1.15E-03 | 3.76E-06 |
| 501.32276 | 212.72 | 14.90 | 14.45 | 14.95 | 15.70 | 6.21E-02  | 7.28E-01 | 9.99E-01 | 2.76E-01 | 6.64E-01 | 3.39E-02 | 3.57E-01 |
| 501.39571 | 290.99 | 14.41 | 14.59 | 15.04 | 14.28 | 1.37E-01  | 9.46E-01 | 2.23E-01 | 9.82E-01 | 5.50E-01 | 8.09E-01 | 1.29E-01 |
| 501.66634 | 17.19  | 11.65 | 15.95 | 16.16 | 14.16 | 1.99E-67  | 5.11E-15 | 5.11E-15 | 5.33E-15 | 7.23E-01 | 4.64E-14 | 4.33E-14 |
| 501.82796 | 60.14  | 14.92 | 13.12 | 14.02 | 14.20 | 7.96E-12  | 5.75E-13 | 5.06E-04 | 1.09E-02 | 6.68E-04 | 6.11E-05 | 8.88E-01 |
| 501.85342 | 42.76  | 17.69 | 19.39 | 19.67 | 19.45 | 1.11E-40  | 5.11E-15 | 5.11E-15 | 5.11E-15 | 1.51E-01 | 9.64E-01 | 3.92E-01 |
| 501.85956 | 29.19  | 14.09 | 15.02 | 14.91 | 14.59 | 6.36E-03  | 7.05E-03 | 2.16E-02 | 3.29E-01 | 9.81E-01 | 4.75E-01 | 7.02E-01 |
| 501.92747 | 37.99  | 15.65 | 18.09 | 17.29 | 16.87 | 5.63E-26  | 5.33E-15 | 6.26E-14 | 2.58E-08 | 4.56E-04 | 7.06E-08 | 1.72E-01 |
| 501.99193 | 53.03  | 8.14  | 15.86 | 12.24 | 8.74  | 1.31E-27  | 7.33E-15 | 3.54E-09 | 7.91E-01 | 5.05E-07 | 3.67E-14 | 2.35E-06 |
| 502.00693 | 47.91  | 13.04 | 15.72 | 16.17 | 14.18 | 3.34E-24  | 4.23E-14 | 2.66E-14 | 8.89E-04 | 4.01E-01 | 4.98E-06 | 1.45E-09 |
| 502.03181 | 18.34  | 11.53 | 14.23 | 13.45 | 13.47 | 1.22E-06  | 6.94E-07 | 6.81E-04 | 9.29E-04 | 4.01E-01 | 4.63E-01 | 1.00E+00 |
| 502.27095 | 192.72 | 16.31 | 13.92 | 13.73 | 14.69 | 6.17E-29  | 1.84E-14 | 5.77E-15 | 9.35E-12 | 8.05E-01 | 3.91E-03 | 1.25E-04 |
| 502.28579 | 194.22 | 19.40 | 19.10 | 19.34 | 18.66 | 5.16E-08  | 7.69E-02 | 9.62E-01 | 8.93E-08 | 2.34E-01 | 3.97E-03 | 1.61E-06 |
| 502.29457 | 207.09 | 19.61 | 19.99 | 19.98 | 19.59 | 3.50E-03  | 3.84E-02 | 4.26E-02 | 9.98E-01 | 1.00E+00 | 3.50E-02 | 3.88E-02 |
| 502.73591 | 84.97  | 14.23 | 12.21 | 13.23 | 12.58 | 1.08E-13  | 2.72E-13 | 4.02E-04 | 4.03E-09 | 4.97E-04 | 5.03E-01 | 6.36E-02 |
| 502.76197 | 80.62  | 14.74 | 14.96 | 15.36 | 15.36 | 7.27E-04  | 6.00E-01 | 2.42E-03 | 4.14E-03 | 1.13E-01 | 1.42E-01 | 1.00E+00 |
| 502.7828  | 50.78  | 21.96 | 22.01 | 22.95 | 22.71 | 1.14E-36  | 8.92E-01 | 5.11E-15 | 4.42E-14 | 5.77E-15 | 4.46E-14 | 9.27E-03 |
| 502.80309 | 67.18  | 15.37 | 13.55 | 16.12 | 15.84 | 1.80E-34  | 4.09E-14 | 1.36E-04 | 4.62E-02 | 5.11E-15 | 6.00E-15 | 4.24E-01 |
| 502.82027 | 140.31 | 15.83 | 13.79 | 13.57 | 14.43 | 5.21E-19  | 5.66E-14 | 4.42E-14 | 1.95E-07 | 8.17E-01 | 5.81E-02 | 4.32E-03 |
| 502.84252 | 49.58  | 20.01 | 21.03 | 21.36 | 21.24 | 1.43E-45  | 5.11E-15 | 5.11E-15 | 5.11E-15 | 3.35E-04 | 5.10E-02 | 5.02E-01 |
| 502.9476  | 66.61  | 12.95 | 12.06 | 13.19 | 14.16 | 2.57E-08  | 2.01E-02 | 8.66E-01 | 8.88E-04 | 2.12E-03 | 2.99E-09 | 1.39E-02 |
| 503.23962 | 165.48 | 14.22 | 14.70 | 14.77 | 13.83 | 6.56E-05  | 1.14E-01 | 4.42E-02 | 2.73E-01 | 9.85E-01 | 7.63E-04 | 1.71E-04 |
| 503.26588 | 154.71 | 13.70 | 9.82  | 11.29 | 13.44 | 1.76E-24  | 3.29E-14 | 5.82E-10 | 9.01E-01 | 4.54E-04 | 4.42E-14 | 1.66E-07 |
| 503.285   | 187.6  | 16.46 | 15.73 | 16.01 | 15.24 | 1.07E-09  | 1.64E-04 | 4.29E-02 | 2.45E-10 | 3.68E-01 | 3.67E-02 | 1.43E-04 |
| 503.29814 | 203.17 | 17.67 | 17.95 | 17.96 | 17.53 | 1.35E-02  | 2.54E-01 | 2.22E-01 | 7.69E-01 | 1.00E+00 | 3.82E-02 | 3.09E-02 |
| 503.33863 | 202.3  | 14.77 | 14.90 | 14.91 | 15.04 | 9.26E-01  | 9.88E-01 | 9.82E-01 | 9.02E-01 | 1.00E+00 | 9.84E-01 | 9.89E-01 |
| 503.7863  | 57.63  | 17.85 | 17.45 | 18.87 | 18.57 | 3.26E-36  | 4.11E-04 | 3.40E-14 | 2.32E-11 | 5.11E-15 | 2.71E-14 | 1.87E-02 |
| 503.84619 | 49.41  | 15.25 | 16.52 | 16.84 | 16.74 | 1.63E-33  | 3.53E-14 | 5.11E-15 | 6.66E-15 | 5.32E-02 | 3.24E-01 | 8.62E-01 |
| 503.94182 | 50.77  | 14.61 | 15.54 | 16.54 | 16.22 | 1.84E-09  | 1.13E-02 | 2.56E-09 | 2.19E-06 | 6.15E-03 | 1.40E-01 | 7.22E-01 |
| 504.11825 | 29.46  | 12.56 | 16.31 | 16.75 | 14.52 | 6.36E-38  | 5.11E-15 | 5.11E-15 | 7.38E-10 | 4.37E-01 | 4.56E-08 | 7.94E-12 |
| 504.27177 | 216.72 | 17.78 | 17.80 | 17.60 | 17.70 | 6.85E-01  | 9.99E-01 | 7.46E-01 | 9.76E-01 | 6.86E-01 | 9.52E-01 | 9.48E-01 |
| 504.29402 | 211.14 | 15.68 | 15.99 | 15.74 | 15.99 | 8.92E-02  | 1.86E-01 | 9.85E-01 | 1.91E-01 | 3.66E-01 | 1.00E+00 | 3.67E-01 |
| 504.31041 | 217.14 | 20.46 | 21.31 | 21.02 | 20.93 | 2.13E-09  | 4.19E-10 | 4.72E-05 | 1.71E-03 | 1.06E-01 | 1.95E-02 | 8.85E-01 |
| 504.74155 | 71.17  | 14.54 | 14.90 | 15.83 | 15.14 | 1.80E-06  | 4.30E-01 | 4.96E-07 | 6.34E-02 | 7.34E-04 | 7.55E-01 | 2.78E-02 |
| 504.75995 | 84.75  | 14.77 | 13.72 | 14.01 | 13.96 | 6.88E-07  | 6.11E-07 | 4.09E-04 | 3.01E-04 | 4.62E-01 | 6.25E-01 | 9.97E-01 |
| 504.78145 | 49.45  | 20.39 | 20.39 | 21.33 | 21.08 | 8.70E-37  | 1.00E+00 | 5.11E-15 | 4.22E-14 | 5.11E-15 | 4.36E-14 | 4.22E-03 |
| 504.79902 | 53.8   | 20.81 | 21.24 | 22.01 | 21.75 | 9.52E-40  | 3.14E-07 | 5.11E-15 | 7.33E-15 | 4.24E-14 | 6.03E-09 | 6.35E-03 |
| 504.83834 | 45.07  | 17.17 | 16.85 | 17.59 | 17.68 | 3.62E-12  | 1.94E-02 | 1.34E-03 | 1.10E-04 | 3.13E-09 | 1.49E-10 | 8.76E-01 |

|           |        |       |       |       |       |           |          |          |          |          |          |          |
|-----------|--------|-------|-------|-------|-------|-----------|----------|----------|----------|----------|----------|----------|
| 504.85287 | 38.16  | 14.37 | 14.09 | 13.47 | 14.37 | 6.22E-02  | 8.75E-01 | 7.17E-02 | 1.00E+00 | 3.60E-01 | 8.88E-01 | 9.58E-02 |
| 504.94537 | 19.11  | 10.22 | 13.32 | 13.95 | 13.46 | 3.56E-12  | 5.88E-08 | 4.11E-11 | 3.13E-08 | 6.28E-01 | 9.94E-01 | 8.03E-01 |
| 504.963   | 57     | 13.33 | 13.53 | 14.90 | 14.92 | 7.49E-10  | 8.90E-01 | 5.01E-07 | 9.98E-07 | 2.96E-05 | 4.61E-05 | 1.00E+00 |
| 505.06368 | 63.74  | 9.59  | 15.09 | 8.61  | 8.94  | 1.47E-110 | 5.11E-15 | 1.03E-08 | 4.29E-04 | 5.11E-15 | 5.11E-15 | 1.94E-01 |
| 505.07456 | 19.72  | 14.83 | 12.78 | 13.31 | 14.59 | 6.26E-05  | 2.24E-04 | 1.01E-02 | 9.62E-01 | 7.11E-01 | 3.02E-03 | 6.23E-02 |
| 505.10784 | 23.13  | 15.13 | 15.02 | 14.83 | 15.20 | 7.88E-01  | 9.90E-01 | 8.54E-01 | 9.97E-01 | 9.63E-01 | 9.62E-01 | 7.73E-01 |
| 505.25695 | 165.25 | 18.88 | 17.72 | 17.99 | 17.92 | 2.49E-17  | 4.29E-14 | 1.29E-10 | 2.38E-11 | 1.68E-01 | 4.49E-01 | 9.54E-01 |
| 505.27568 | 211.75 | 15.36 | 14.89 | 14.35 | 14.61 | 3.51E-04  | 2.05E-01 | 1.78E-04 | 1.33E-02 | 1.24E-01 | 6.83E-01 | 7.29E-01 |
| 505.29853 | 205.49 | 14.81 | 13.87 | 13.70 | 13.98 | 2.77E-07  | 3.19E-05 | 4.70E-07 | 5.14E-04 | 8.42E-01 | 9.50E-01 | 5.34E-01 |
| 505.31381 | 211.54 | 18.38 | 19.22 | 18.93 | 18.81 | 4.29E-07  | 9.56E-08 | 8.20E-04 | 2.16E-02 | 1.93E-01 | 3.27E-02 | 8.42E-01 |
| 505.33634 | 209.55 | 15.94 | 16.51 | 16.30 | 15.92 | 3.37E-01  | 4.12E-01 | 7.62E-01 | 1.00E+00 | 9.42E-01 | 4.24E-01 | 7.57E-01 |
| 505.35411 | 194.57 | 14.82 | 14.16 | 13.82 | 14.28 | 8.86E-02  | 3.53E-01 | 5.43E-02 | 5.54E-01 | 8.23E-01 | 9.92E-01 | 6.71E-01 |
| 505.78416 | 58.76  | 15.83 | 14.46 | 16.84 | 16.54 | 5.41E-53  | 1.02E-14 | 4.65E-14 | 7.28E-08 | 5.11E-15 | 5.11E-15 | 6.86E-02 |
| 505.80176 | 56.41  | 16.51 | 16.45 | 17.83 | 17.49 | 1.02E-39  | 9.15E-01 | 5.11E-15 | 4.29E-14 | 5.11E-15 | 4.20E-14 | 5.98E-03 |
| 505.95965 | 55.34  | 14.16 | 16.36 | 17.10 | 16.23 | 1.65E-29  | 4.27E-14 | 5.11E-15 | 4.31E-14 | 7.66E-03 | 9.47E-01 | 1.50E-03 |
| 506.0635  | 22.12  | 14.14 | 15.99 | 16.01 | 15.88 | 7.10E-08  | 2.61E-06 | 1.75E-06 | 2.10E-05 | 1.00E+00 | 9.90E-01 | 9.86E-01 |
| 506.1261  | 22.96  | 16.91 | 18.10 | 17.84 | 17.52 | 1.13E-06  | 8.14E-07 | 1.50E-04 | 3.69E-02 | 6.51E-01 | 5.76E-02 | 4.88E-01 |
| 506.25945 | 149.03 | 17.07 | 15.47 | 15.60 | 15.75 | 2.59E-20  | 4.35E-14 | 4.33E-14 | 2.67E-12 | 8.57E-01 | 3.83E-01 | 8.39E-01 |
| 506.28944 | 205.2  | 16.51 | 17.37 | 17.50 | 16.73 | 1.02E-07  | 4.13E-05 | 1.29E-06 | 6.59E-01 | 9.03E-01 | 7.36E-03 | 6.26E-04 |
| 506.31424 | 194.27 | 14.48 | 16.08 | 14.83 | 13.85 | 1.22E-07  | 5.55E-05 | 7.43E-01 | 3.01E-01 | 3.56E-03 | 4.79E-08 | 4.00E-02 |
| 506.32568 | 207.89 | 19.09 | 14.72 | 15.20 | 15.02 | 4.60E-59  | 5.11E-15 | 5.11E-15 | 5.11E-15 | 1.32E-01 | 5.34E-01 | 8.68E-01 |
| 506.33945 | 205.95 | 13.09 | 13.83 | 13.80 | 13.00 | 1.80E-01  | 4.01E-01 | 4.28E-01 | 9.98E-01 | 1.00E+00 | 3.48E-01 | 3.72E-01 |
| 506.73912 | 80.44  | 13.46 | 12.16 | 13.97 | 13.29 | 9.23E-10  | 4.51E-06 | 1.84E-01 | 9.18E-01 | 2.43E-10 | 2.22E-04 | 5.64E-02 |
| 506.7789  | 58.98  | 16.96 | 16.54 | 17.97 | 17.60 | 3.11E-33  | 2.96E-04 | 4.15E-14 | 1.45E-08 | 5.11E-15 | 4.22E-14 | 3.58E-03 |
| 506.79587 | 54.53  | 19.56 | 19.55 | 20.46 | 20.33 | 2.94E-29  | 9.99E-01 | 3.35E-14 | 4.46E-14 | 3.66E-14 | 4.53E-14 | 5.00E-01 |
| 506.81123 | 41.11  | 18.36 | 19.12 | 19.36 | 19.34 | 3.10E-15  | 3.03E-08 | 2.97E-13 | 5.72E-12 | 2.38E-01 | 3.78E-01 | 9.96E-01 |
| 506.83155 | 47.97  | 12.86 | 8.32  | 12.44 | 12.49 | 3.86E-08  | 1.97E-07 | 9.49E-01 | 9.67E-01 | 4.59E-06 | 7.66E-06 | 1.00E+00 |
| 506.87423 | 40.61  | 19.65 | 21.83 | 21.47 | 21.48 | 5.65E-26  | 1.53E-14 | 4.24E-14 | 4.31E-14 | 2.50E-01 | 2.88E-01 | 1.00E+00 |
| 507.01824 | 17.27  | 10.85 | 11.77 | 13.27 | 12.94 | 7.98E-07  | 1.98E-01 | 1.91E-06 | 9.93E-05 | 9.13E-03 | 7.98E-02 | 9.05E-01 |
| 507.27341 | 160.59 | 23.88 | 23.58 | 24.03 | 23.74 | 2.41E-04  | 2.06E-02 | 4.09E-01 | 5.52E-01 | 1.18E-04 | 4.53E-01 | 3.15E-02 |
| 507.31577 | 194.41 | 15.76 | 16.23 | 15.78 | 15.57 | 3.72E-01  | 5.78E-01 | 1.00E+00 | 9.57E-01 | 6.30E-01 | 3.22E-01 | 9.45E-01 |
| 507.32961 | 214.56 | 16.45 | 12.07 | 12.20 | 13.10 | 3.60E-59  | 5.11E-15 | 5.11E-15 | 5.11E-15 | 9.35E-01 | 5.75E-05 | 5.17E-04 |
| 507.44225 | 225.57 | 19.15 | 17.19 | 17.11 | 17.55 | 1.12E-14  | 9.72E-12 | 1.01E-12 | 5.22E-08 | 9.91E-01 | 5.75E-01 | 3.92E-01 |
| 507.79927 | 58.25  | 14.55 | 13.36 | 15.77 | 15.52 | 5.04E-30  | 4.00E-09 | 8.97E-10 | 3.24E-06 | 5.11E-15 | 2.35E-14 | 5.61E-01 |
| 507.87767 | 40.72  | 15.37 | 17.85 | 17.47 | 17.41 | 2.07E-24  | 2.64E-14 | 4.37E-14 | 4.37E-14 | 3.55E-01 | 2.58E-01 | 9.95E-01 |
| 507.96859 | 27.37  | 10.42 | 15.88 | 16.16 | 15.31 | 2.00E-51  | 5.11E-15 | 5.11E-15 | 5.11E-15 | 8.22E-01 | 3.31E-01 | 5.52E-02 |
| 508.04314 | 23.69  | 13.50 | 13.38 | 12.94 | 13.24 | 6.96E-01  | 9.95E-01 | 6.55E-01 | 9.55E-01 | 8.10E-01 | 9.93E-01 | 9.35E-01 |
| 508.13072 | 22.98  | 13.60 | 14.36 | 13.10 | 13.33 | 1.42E-03  | 8.75E-02 | 3.90E-01 | 8.44E-01 | 8.75E-04 | 1.41E-02 | 8.99E-01 |
| 508.27607 | 152.24 | 21.94 | 21.62 | 22.10 | 21.80 | 1.94E-04  | 1.67E-02 | 4.15E-01 | 5.56E-01 | 9.18E-05 | 4.10E-01 | 3.28E-02 |
| 508.30523 | 180.72 | 14.15 | 15.48 | 15.66 | 14.74 | 1.13E-06  | 6.71E-05 | 3.23E-06 | 2.09E-01 | 9.28E-01 | 8.85E-02 | 1.71E-02 |
| 508.32701 | 199.48 | 16.36 | 17.35 | 16.49 | 16.06 | 4.07E-09  | 2.26E-06 | 9.07E-01 | 4.11E-01 | 7.09E-05 | 3.74E-09 | 1.39E-01 |
| 508.34137 | 235.36 | 18.34 | 20.20 | 19.75 | 20.36 | 2.49E-10  | 2.92E-08 | 3.13E-05 | 3.70E-09 | 4.75E-01 | 9.54E-01 | 2.19E-01 |
| 508.44585 | 225.67 | 17.15 | 13.87 | 13.75 | 14.90 | 2.63E-16  | 2.97E-13 | 6.78E-14 | 1.06E-06 | 9.92E-01 | 7.69E-02 | 3.53E-02 |
| 508.72767 | 65.84  | 15.90 | 13.40 | 16.34 | 16.34 | 3.66E-49  | 5.11E-15 | 3.85E-02 | 4.69E-02 | 5.11E-15 | 5.11E-15 | 1.00E+00 |
| 508.74049 | 74.49  | 13.30 | 10.25 | 13.28 | 12.63 | 1.09E-23  | 3.55E-14 | 1.00E+00 | 1.09E-01 | 4.09E-14 | 8.30E-13 | 1.43E-01 |

|           |        |       |       |       |       |          |          |          |          |          |          |          |
|-----------|--------|-------|-------|-------|-------|----------|----------|----------|----------|----------|----------|----------|
| 508.79193 | 60.17  | 16.82 | 15.79 | 17.01 | 16.71 | 9.84E-20 | 5.51E-14 | 3.70E-01 | 7.95E-01 | 4.20E-14 | 4.83E-11 | 7.39E-02 |
| 508.81186 | 50.89  | 18.44 | 17.40 | 17.85 | 18.14 | 8.35E-07 | 2.98E-07 | 6.85E-03 | 3.95E-01 | 8.74E-02 | 9.82E-04 | 4.10E-01 |
| 508.83194 | 58.3   | 14.97 | 11.71 | 15.53 | 15.19 | 4.49E-29 | 3.53E-14 | 2.40E-01 | 8.86E-01 | 6.00E-15 | 3.31E-14 | 7.11E-01 |
| 508.87069 | 43.01  | 16.94 | 17.80 | 17.29 | 17.47 | 2.87E-05 | 7.84E-06 | 1.77E-01 | 1.64E-02 | 2.16E-02 | 2.72E-01 | 7.50E-01 |
| 508.88974 | 35.18  | 17.17 | 19.76 | 19.42 | 19.34 | 5.47E-27 | 1.20E-14 | 4.16E-14 | 4.49E-14 | 4.39E-01 | 2.88E-01 | 9.88E-01 |
| 508.95034 | 60.94  | 12.34 | 10.72 | 14.65 | 14.50 | 1.47E-23 | 1.00E-04 | 8.96E-09 | 2.45E-07 | 4.00E-14 | 4.22E-14 | 9.78E-01 |
| 508.97349 | 72.64  | 13.21 | 15.31 | 11.14 | 11.81 | 3.34E-74 | 5.11E-15 | 5.11E-15 | 4.29E-14 | 5.11E-15 | 5.11E-15 | 1.43E-04 |
| 508.98771 | 19.46  | 12.29 | 15.68 | 15.90 | 15.30 | 4.05E-18 | 1.09E-13 | 4.43E-14 | 6.62E-11 | 9.51E-01 | 8.10E-01 | 4.90E-01 |
| 509.05136 | 22.03  | 14.40 | 15.70 | 14.99 | 15.73 | 3.38E-06 | 3.08E-05 | 1.41E-01 | 3.12E-05 | 6.40E-02 | 9.99E-01 | 5.60E-02 |
| 509.1332  | 85.47  | 12.40 | 12.56 | 15.00 | 14.84 | 1.15E-10 | 9.86E-01 | 1.25E-07 | 1.92E-06 | 1.61E-06 | 1.74E-05 | 9.87E-01 |
| 509.271   | 163.3  | 10.45 | 12.16 | 12.09 | 11.58 | 1.73E-02 | 2.45E-02 | 3.17E-02 | 2.61E-01 | 9.99E-01 | 7.95E-01 | 8.48E-01 |
| 509.27965 | 152.26 | 18.72 | 18.53 | 19.11 | 18.89 | 2.32E-03 | 5.68E-01 | 5.16E-02 | 7.08E-01 | 1.20E-03 | 1.09E-01 | 5.07E-01 |
| 509.28898 | 165.8  | 24.07 | 23.34 | 23.67 | 23.41 | 6.78E-13 | 4.72E-12 | 2.84E-04 | 1.61E-09 | 3.87E-03 | 8.65E-01 | 5.22E-02 |
| 509.3315  | 205.28 | 16.29 | 17.45 | 17.30 | 16.73 | 4.02E-09 | 2.60E-08 | 1.25E-06 | 1.13E-01 | 8.59E-01 | 2.15E-03 | 2.33E-02 |
| 509.34474 | 211.17 | 16.46 | 18.20 | 16.44 | 18.62 | 3.93E-19 | 7.41E-10 | 1.00E+00 | 1.66E-13 | 9.59E-10 | 3.99E-01 | 2.33E-13 |
| 509.89177 | 33.35  | 10.94 | 14.59 | 14.01 | 14.52 | 3.79E-22 | 4.29E-14 | 7.96E-14 | 4.35E-14 | 4.10E-01 | 9.97E-01 | 5.58E-01 |
| 509.90804 | 35.97  | 14.39 | 12.25 | 12.98 | 12.91 | 8.34E-04 | 3.91E-04 | 3.77E-02 | 3.45E-02 | 5.23E-01 | 6.29E-01 | 9.99E-01 |
| 509.97266 | 17.36  | 14.92 | 15.13 | 14.87 | 13.93 | 1.42E-02 | 9.39E-01 | 9.99E-01 | 4.68E-02 | 8.95E-01 | 1.21E-02 | 7.47E-02 |
| 510.23661 | 208.88 | 14.53 | 14.28 | 13.87 | 14.43 | 5.64E-02 | 7.59E-01 | 4.43E-02 | 9.83E-01 | 3.84E-01 | 9.39E-01 | 1.45E-01 |
| 510.28657 | 171.47 | 22.11 | 21.39 | 21.80 | 21.49 | 2.88E-11 | 1.38E-10 | 1.07E-02 | 6.90E-08 | 8.14E-04 | 7.98E-01 | 2.40E-02 |
| 510.33453 | 199.23 | 13.87 | 14.38 | 14.39 | 14.47 | 4.29E-02 | 1.31E-01 | 1.10E-01 | 5.87E-02 | 1.00E+00 | 9.80E-01 | 9.87E-01 |
| 510.34517 | 210.19 | 14.72 | 16.80 | 14.92 | 15.73 | 1.64E-15 | 6.06E-14 | 8.37E-01 | 4.30E-04 | 7.58E-12 | 2.81E-04 | 9.39E-03 |
| 510.72549 | 66.43  | 14.59 | 11.66 | 15.28 | 15.28 | 7.68E-33 | 3.31E-14 | 5.20E-02 | 6.55E-02 | 5.11E-15 | 5.33E-15 | 1.00E+00 |
| 510.74887 | 75.8   | 17.63 | 18.11 | 18.39 | 17.63 | 4.22E-10 | 8.31E-04 | 1.89E-08 | 1.00E+00 | 1.25E-01 | 1.52E-03 | 8.74E-08 |
| 510.80858 | 72.06  | 16.10 | 14.53 | 14.51 | 14.64 | 3.29E-20 | 4.42E-14 | 4.16E-14 | 2.03E-13 | 1.00E+00 | 9.38E-01 | 9.00E-01 |
| 510.82846 | 44.48  | 19.88 | 20.75 | 20.06 | 20.33 | 2.30E-13 | 2.40E-13 | 3.37E-01 | 3.66E-04 | 8.11E-09 | 1.37E-03 | 7.81E-02 |
| 510.86155 | 35.64  | 14.01 | 12.37 | 13.82 | 13.20 | 3.05E-06 | 4.06E-06 | 9.35E-01 | 6.96E-02 | 8.37E-05 | 6.95E-02 | 2.52E-01 |
| 510.88534 | 41.02  | 15.13 | 18.57 | 18.53 | 18.58 | 5.89E-29 | 2.20E-14 | 2.26E-14 | 2.95E-14 | 9.99E-01 | 1.00E+00 | 9.99E-01 |
| 510.92286 | 26.75  | 14.74 | 15.52 | 15.29 | 16.05 | 4.02E-06 | 5.92E-03 | 8.80E-02 | 9.21E-07 | 7.75E-01 | 1.45E-01 | 1.22E-02 |
| 511.00362 | 17.14  | 13.22 | 15.23 | 14.91 | 13.50 | 3.95E-15 | 3.57E-12 | 3.43E-09 | 7.27E-01 | 6.22E-01 | 1.26E-08 | 3.88E-06 |
| 511.15118 | 72.76  | 8.61  | 8.31  | 11.74 | 12.31 | 1.93E-28 | 8.33E-01 | 4.61E-14 | 4.26E-14 | 4.17E-14 | 3.97E-14 | 4.39E-01 |
| 511.1948  | 65.24  | 19.61 | 21.18 | 19.17 | 19.22 | 5.39E-77 | 5.11E-15 | 2.48E-08 | 2.72E-06 | 5.11E-15 | 5.11E-15 | 8.97E-01 |
| 511.29147 | 167.53 | 19.24 | 18.35 | 18.90 | 18.61 | 1.12E-11 | 6.75E-12 | 2.12E-02 | 2.67E-06 | 4.47E-05 | 1.56E-01 | 8.88E-02 |
| 511.30518 | 186.8  | 22.00 | 21.67 | 22.04 | 21.32 | 4.15E-08 | 3.28E-02 | 9.88E-01 | 8.92E-07 | 1.53E-02 | 3.96E-02 | 3.17E-07 |
| 511.34694 | 196.19 | 14.80 | 14.98 | 14.73 | 14.55 | 3.50E-01 | 8.52E-01 | 9.91E-01 | 7.02E-01 | 7.07E-01 | 2.70E-01 | 8.62E-01 |
| 511.47394 | 258.49 | 23.07 | 22.69 | 22.59 | 22.29 | 4.42E-08 | 9.98E-03 | 3.53E-04 | 8.84E-09 | 8.14E-01 | 9.77E-03 | 9.60E-02 |
| 511.83048 | 49.45  | 14.89 | 15.61 | 14.90 | 14.90 | 2.68E-03 | 6.44E-03 | 1.00E+00 | 1.00E+00 | 8.99E-03 | 1.36E-02 | 1.00E+00 |
| 511.86658 | 38.28  | 16.84 | 16.55 | 17.21 | 16.18 | 1.97E-02 | 8.09E-01 | 6.45E-01 | 1.83E-01 | 1.86E-01 | 6.76E-01 | 1.19E-02 |
| 512.0295  | 26.7   | 11.87 | 14.78 | 14.68 | 13.75 | 1.37E-19 | 4.26E-14 | 4.40E-14 | 9.02E-08 | 9.87E-01 | 9.55E-03 | 2.33E-02 |
| 512.19859 | 57.41  | 17.33 | 18.91 | 16.79 | 16.88 | 1.61E-81 | 5.11E-15 | 1.29E-11 | 3.75E-08 | 5.11E-15 | 5.11E-15 | 6.77E-01 |
| 512.2999  | 195.92 | 22.76 | 22.28 | 22.30 | 22.11 | 5.79E-09 | 1.40E-05 | 3.54E-05 | 7.03E-09 | 9.95E-01 | 3.88E-01 | 2.56E-01 |
| 512.30738 | 180.08 | 17.72 | 19.46 | 19.99 | 18.87 | 1.42E-20 | 4.27E-13 | 3.70E-14 | 3.19E-06 | 8.62E-02 | 5.19E-02 | 1.07E-05 |
| 512.32093 | 192.52 | 12.63 | 16.96 | 16.86 | 15.73 | 1.15E-67 | 5.11E-15 | 5.11E-15 | 5.11E-15 | 9.61E-01 | 1.62E-08 | 1.53E-07 |
| 512.47732 | 263.7  | 21.48 | 21.05 | 20.97 | 20.70 | 7.96E-08 | 3.28E-03 | 2.48E-04 | 2.15E-08 | 9.20E-01 | 3.96E-02 | 1.63E-01 |
| 512.74576 | 76.13  | 15.79 | 15.16 | 15.35 | 15.37 | 8.83E-05 | 3.99E-05 | 7.17E-03 | 1.72E-02 | 5.25E-01 | 4.50E-01 | 9.98E-01 |

|           |        |       |       |       |       |           |          |          |          |          |          |          |
|-----------|--------|-------|-------|-------|-------|-----------|----------|----------|----------|----------|----------|----------|
| 512.76442 | 63.12  | 18.22 | 17.90 | 18.14 | 18.13 | 4.11E-02  | 2.72E-02 | 9.10E-01 | 8.66E-01 | 1.53E-01 | 2.25E-01 | 9.99E-01 |
| 512.82267 | 41.68  | 18.03 | 18.54 | 18.82 | 18.23 | 9.49E-12  | 1.95E-05 | 1.02E-11 | 2.51E-01 | 4.99E-02 | 3.51E-02 | 1.92E-06 |
| 512.88052 | 41.07  | 15.52 | 16.02 | 16.02 | 16.32 | 5.84E-04  | 3.76E-02 | 3.44E-02 | 2.46E-04 | 1.00E+00 | 4.34E-01 | 4.31E-01 |
| 512.90271 | 41.58  | 18.06 | 18.16 | 18.41 | 18.44 | 2.24E-01  | 9.64E-01 | 3.40E-01 | 3.07E-01 | 6.54E-01 | 6.03E-01 | 9.99E-01 |
| 512.9231  | 39.3   | 15.11 | 17.31 | 17.60 | 17.26 | 1.25E-30  | 2.71E-14 | 5.33E-15 | 3.69E-14 | 4.79E-01 | 9.97E-01 | 3.72E-01 |
| 513.00643 | 54.05  | 13.99 | 18.81 | 10.94 | 11.59 | 2.02E-87  | 5.11E-15 | 5.33E-15 | 4.32E-14 | 5.11E-15 | 5.11E-15 | 5.36E-02 |
| 513.04756 | 60.75  | 13.83 | 17.30 | 12.10 | 12.67 | 6.96E-113 | 5.11E-15 | 5.11E-15 | 4.44E-14 | 5.11E-15 | 5.11E-15 | 3.97E-05 |
| 513.1945  | 66.69  | 14.00 | 14.88 | 12.19 | 12.86 | 4.25E-66  | 3.03E-13 | 5.11E-15 | 4.22E-14 | 5.11E-15 | 5.11E-15 | 1.11E-07 |
| 513.30318 | 289.05 | 17.81 | 17.83 | 17.70 | 18.50 | 1.43E-06  | 9.98E-01 | 8.69E-01 | 4.30E-05 | 7.91E-01 | 1.52E-04 | 2.29E-06 |
| 513.30324 | 196.48 | 20.68 | 20.07 | 20.10 | 19.94 | 1.55E-09  | 1.44E-06 | 4.20E-06 | 8.89E-09 | 9.93E-01 | 6.97E-01 | 5.28E-01 |
| 513.31111 | 184.08 | 14.87 | 16.02 | 16.42 | 15.69 | 5.84E-04  | 1.44E-02 | 2.84E-04 | 1.54E-01 | 7.19E-01 | 8.43E-01 | 2.50E-01 |
| 513.32427 | 194.02 | 13.27 | 15.40 | 15.25 | 14.40 | 8.53E-12  | 1.54E-10 | 1.69E-09 | 1.83E-03 | 9.66E-01 | 1.13E-02 | 3.95E-02 |
| 513.47981 | 258.65 | 18.84 | 18.17 | 18.05 | 17.83 | 2.11E-10  | 2.99E-05 | 5.06E-07 | 3.51E-10 | 8.56E-01 | 1.09E-01 | 4.35E-01 |
| 513.81395 | 63.86  | 13.30 | 11.37 | 13.41 | 13.11 | 1.89E-12  | 3.00E-10 | 9.78E-01 | 9.10E-01 | 6.80E-11 | 7.78E-08 | 7.29E-01 |
| 513.86625 | 38.98  | 14.68 | 13.12 | 13.25 | 13.02 | 2.06E-06  | 4.78E-05 | 1.83E-04 | 2.05E-05 | 9.85E-01 | 9.91E-01 | 9.17E-01 |
| 513.89791 | 36.78  | 13.03 | 14.15 | 14.90 | 14.16 | 1.73E-05  | 1.46E-02 | 3.79E-06 | 1.71E-02 | 1.86E-01 | 1.00E+00 | 2.14E-01 |
| 514.08551 | 19.9   | 13.58 | 16.09 | 15.06 | 14.56 | 5.03E-05  | 1.35E-05 | 2.25E-02 | 2.57E-01 | 2.06E-01 | 2.73E-02 | 7.93E-01 |
| 514.25547 | 165.99 | 12.20 | 11.96 | 13.93 | 11.89 | 9.32E-08  | 9.06E-01 | 2.27E-05 | 8.44E-01 | 2.00E-06 | 9.99E-01 | 1.70E-06 |
| 514.28566 | 23.85  | 21.49 | 21.93 | 20.01 | 21.38 | 2.32E-03  | 8.18E-01 | 2.00E-02 | 9.97E-01 | 1.58E-03 | 7.32E-01 | 5.33E-02 |
| 514.30583 | 196.61 | 17.91 | 16.45 | 17.02 | 16.77 | 1.47E-06  | 8.86E-07 | 5.66E-03 | 2.99E-04 | 1.59E-01 | 6.71E-01 | 8.04E-01 |
| 514.37545 | 188.17 | 13.14 | 14.93 | 14.97 | 14.34 | 1.99E-13  | 3.43E-11 | 1.01E-11 | 2.27E-05 | 9.99E-01 | 1.02E-01 | 7.25E-02 |
| 514.67385 | 20.99  | 12.78 | 16.09 | 16.02 | 14.27 | 1.57E-40  | 5.11E-15 | 5.11E-15 | 2.66E-09 | 9.87E-01 | 1.80E-12 | 8.53E-12 |
| 514.70249 | 82.72  | 9.07  | 11.16 | 11.48 | 9.57  | 1.31E-06  | 2.29E-04 | 1.15E-05 | 7.57E-01 | 9.21E-01 | 1.50E-02 | 1.76E-03 |
| 514.76228 | 66.26  | 15.91 | 15.56 | 16.55 | 15.96 | 2.39E-12  | 2.17E-02 | 1.19E-06 | 9.71E-01 | 3.57E-13 | 9.34E-03 | 3.34E-05 |
| 514.81683 | 38     | 15.34 | 15.89 | 16.63 | 15.55 | 4.86E-11  | 1.36E-02 | 3.87E-11 | 6.66E-01 | 3.89E-04 | 2.84E-01 | 1.66E-07 |
| 514.83997 | 145.53 | 14.05 | 7.13  | 6.78  | 9.85  | 1.00E-37  | 5.11E-15 | 5.11E-15 | 1.81E-13 | 9.04E-01 | 3.40E-06 | 1.00E-07 |
| 514.86168 | 41.06  | 20.24 | 21.13 | 21.42 | 21.36 | 1.55E-25  | 8.19E-14 | 2.22E-14 | 4.13E-14 | 4.08E-02 | 1.68E-01 | 9.55E-01 |
| 514.9616  | 54.23  | 11.98 | 21.16 | 12.73 | 13.64 | 2.96E-64  | 5.11E-15 | 2.32E-01 | 3.83E-04 | 5.11E-15 | 5.11E-15 | 1.28E-01 |
| 514.9834  | 30.85  | 11.83 | 18.06 | 16.36 | 15.35 | 3.61E-56  | 5.11E-15 | 5.11E-15 | 7.55E-15 | 1.05E-07 | 4.36E-14 | 4.94E-03 |
| 515.05674 | 22.54  | 13.92 | 17.56 | 17.17 | 16.09 | 9.45E-28  | 7.33E-15 | 2.98E-14 | 1.56E-10 | 5.97E-01 | 3.84E-05 | 3.82E-03 |
| 515.06957 | 18.58  | 11.66 | 13.22 | 14.95 | 12.95 | 4.98E-08  | 1.48E-02 | 5.53E-09 | 7.28E-02 | 7.23E-03 | 9.61E-01 | 1.73E-03 |
| 515.29033 | 25.5   | 19.42 | 19.73 | 17.40 | 19.12 | 4.71E-04  | 9.48E-01 | 2.76E-03 | 9.59E-01 | 5.70E-04 | 7.49E-01 | 2.39E-02 |
| 515.30303 | 194.12 | 15.15 | 14.32 | 15.01 | 15.92 | 4.20E-02  | 3.76E-01 | 9.93E-01 | 4.81E-01 | 5.55E-01 | 2.03E-02 | 3.48E-01 |
| 515.68066 | 19.17  | 9.77  | 13.63 | 13.93 | 12.49 | 2.70E-38  | 5.11E-15 | 5.11E-15 | 4.20E-14 | 7.09E-01 | 9.21E-04 | 1.03E-05 |
| 515.86444 | 49.19  | 16.14 | 17.01 | 17.40 | 17.30 | 1.13E-21  | 1.13E-10 | 4.14E-14 | 4.21E-14 | 1.42E-02 | 1.26E-01 | 8.81E-01 |
| 515.96699 | 63.17  | 13.83 | 16.60 | 12.02 | 12.67 | 1.21E-136 | 5.11E-15 | 5.11E-15 | 5.11E-15 | 5.11E-15 | 5.11E-15 | 6.09E-13 |
| 515.98117 | 26.99  | 17.57 | 18.54 | 17.57 | 17.47 | 8.88E-11  | 2.35E-08 | 1.00E+00 | 9.27E-01 | 3.80E-08 | 5.09E-09 | 9.40E-01 |
| 516.05549 | 18.07  | 12.41 | 16.39 | 15.19 | 15.37 | 1.96E-15  | 4.53E-14 | 1.63E-08 | 5.84E-09 | 4.60E-02 | 1.43E-01 | 9.79E-01 |
| 516.12608 | 20.72  | 14.59 | 13.67 | 13.26 | 14.97 | 4.82E-03  | 2.67E-01 | 4.28E-02 | 8.91E-01 | 8.60E-01 | 7.60E-02 | 8.24E-03 |
| 516.25898 | 172.21 | 8.70  | 12.75 | 10.41 | 9.59  | 1.61E-21  | 2.71E-14 | 2.69E-05 | 8.91E-02 | 1.50E-08 | 2.22E-13 | 1.43E-01 |
| 516.27493 | 175.85 | 14.61 | 15.91 | 16.30 | 15.76 | 2.61E-07  | 1.03E-04 | 1.70E-07 | 1.15E-03 | 5.72E-01 | 9.62E-01 | 3.04E-01 |
| 516.7771  | 148.77 | 14.26 | 12.74 | 13.51 | 13.89 | 7.08E-03  | 3.78E-03 | 3.13E-01 | 8.52E-01 | 3.25E-01 | 6.53E-02 | 8.33E-01 |
| 516.79804 | 57.75  | 19.45 | 18.76 | 19.88 | 19.71 | 3.62E-31  | 5.47E-14 | 1.17E-06 | 1.16E-02 | 5.11E-15 | 2.38E-14 | 1.74E-01 |
| 516.81936 | 45.88  | 21.26 | 22.57 | 23.04 | 22.82 | 1.14E-44  | 5.33E-15 | 5.11E-15 | 5.11E-15 | 1.08E-04 | 1.14E-01 | 1.90E-01 |
| 516.83731 | 47.01  | 16.40 | 17.09 | 16.90 | 17.05 | 1.16E-08  | 6.85E-08 | 1.28E-04 | 1.03E-06 | 3.79E-01 | 9.82E-01 | 6.34E-01 |

|           |        |       |       |       |       |           |          |          |          |          |          |          |
|-----------|--------|-------|-------|-------|-------|-----------|----------|----------|----------|----------|----------|----------|
| 516.85779 | 47.45  | 18.19 | 18.87 | 19.06 | 19.15 | 1.28E-22  | 7.98E-12 | 4.17E-14 | 4.12E-14 | 1.75E-01 | 2.38E-02 | 8.10E-01 |
| 516.96405 | 63.34  | 14.80 | 18.43 | 13.47 | 13.88 | 2.91E-149 | 5.11E-15 | 5.11E-15 | 9.33E-15 | 5.11E-15 | 5.11E-15 | 1.73E-06 |
| 516.98372 | 49.54  | 10.96 | 14.66 | 15.13 | 12.89 | 2.29E-11  | 1.81E-08 | 1.64E-10 | 1.05E-02 | 8.75E-01 | 2.72E-02 | 2.43E-03 |
| 517.03957 | 18.19  | 13.67 | 15.90 | 16.44 | 15.91 | 2.37E-10  | 1.03E-06 | 7.01E-10 | 1.97E-06 | 5.78E-01 | 1.00E+00 | 6.00E-01 |
| 517.25654 | 182.62 | 13.29 | 12.63 | 13.39 | 12.10 | 1.74E-04  | 1.36E-01 | 9.88E-01 | 1.18E-03 | 7.30E-02 | 3.70E-01 | 4.79E-04 |
| 517.27727 | 166.38 | 11.50 | 12.22 | 12.59 | 12.21 | 6.32E-02  | 2.96E-01 | 3.93E-02 | 3.42E-01 | 8.16E-01 | 1.00E+00 | 8.05E-01 |
| 517.31764 | 182.63 | 16.20 | 15.25 | 16.03 | 16.29 | 1.20E-01  | 1.66E-01 | 9.82E-01 | 9.97E-01 | 3.43E-01 | 1.38E-01 | 9.46E-01 |
| 517.80179 | 62.34  | 14.73 | 11.40 | 14.10 | 14.04 | 1.88E-42  | 5.11E-15 | 8.14E-03 | 4.20E-03 | 5.11E-15 | 5.33E-15 | 9.90E-01 |
| 517.82255 | 52.92  | 17.22 | 18.61 | 19.20 | 18.94 | 3.21E-42  | 1.44E-14 | 5.11E-15 | 5.11E-15 | 1.98E-05 | 5.48E-02 | 1.63E-01 |
| 517.89573 | 35.41  | 16.08 | 16.98 | 16.81 | 16.29 | 7.89E-09  | 6.95E-08 | 1.46E-05 | 5.15E-01 | 6.81E-01 | 1.61E-04 | 7.70E-03 |
| 517.90544 | 38.58  | 13.17 | 16.34 | 15.42 | 15.62 | 2.68E-34  | 5.11E-15 | 4.02E-14 | 2.91E-14 | 3.19E-04 | 1.08E-02 | 8.24E-01 |
| 517.96557 | 58.58  | 12.09 | 14.04 | 10.61 | 10.09 | 1.92E-31  | 4.83E-10 | 2.14E-06 | 5.07E-10 | 1.02E-14 | 5.11E-15 | 3.14E-01 |
| 517.98106 | 50.38  | 13.88 | 16.62 | 17.15 | 15.68 | 3.02E-32  | 1.55E-14 | 5.11E-15 | 2.24E-11 | 1.37E-01 | 1.57E-03 | 1.12E-07 |
| 518.25076 | 176.84 | 17.39 | 16.44 | 16.30 | 16.27 | 2.64E-13  | 1.87E-08 | 8.48E-11 | 8.90E-11 | 8.20E-01 | 7.06E-01 | 9.95E-01 |
| 518.28786 | 209.68 | 16.03 | 14.92 | 15.22 | 14.45 | 6.62E-10  | 7.23E-06 | 1.61E-03 | 2.64E-10 | 5.57E-01 | 1.85E-01 | 5.91E-03 |
| 518.32105 | 183.14 | 14.51 | 13.23 | 13.77 | 14.32 | 1.78E-02  | 1.59E-02 | 3.06E-01 | 9.72E-01 | 5.97E-01 | 7.74E-02 | 6.17E-01 |
| 518.75666 | 59.37  | 20.43 | 20.40 | 21.60 | 21.29 | 3.64E-22  | 9.98E-01 | 4.33E-14 | 1.04E-09 | 4.42E-14 | 1.15E-09 | 1.04E-01 |
| 518.77712 | 55.59  | 16.11 | 14.50 | 17.37 | 17.05 | 2.77E-55  | 9.33E-15 | 4.33E-14 | 1.04E-09 | 5.11E-15 | 5.11E-15 | 1.22E-01 |
| 518.79343 | 137.44 | 15.26 | 14.27 | 14.56 | 14.90 | 9.47E-08  | 6.09E-08 | 1.67E-04 | 1.47E-01 | 3.33E-01 | 2.42E-03 | 2.07E-01 |
| 518.81776 | 43.46  | 19.87 | 20.72 | 21.31 | 21.12 | 8.74E-43  | 4.26E-14 | 5.11E-15 | 5.11E-15 | 1.25E-09 | 8.61E-05 | 1.79E-01 |
| 518.9259  | 48.97  | 12.77 | 15.21 | 16.24 | 16.02 | 7.94E-18  | 8.32E-09 | 4.27E-14 | 1.68E-13 | 4.86E-02 | 2.00E-01 | 9.48E-01 |
| 518.96771 | 145.26 | 7.81  | 7.49  | 7.71  | 12.50 | 2.56E-38  | 7.76E-01 | 9.91E-01 | 5.11E-15 | 9.17E-01 | 5.11E-15 | 5.11E-15 |
| 519.05358 | 18.67  | 16.58 | 17.07 | 17.29 | 17.55 | 1.09E-01  | 6.13E-01 | 2.77E-01 | 8.51E-02 | 9.47E-01 | 6.58E-01 | 9.24E-01 |
| 519.25415 | 167.42 | 14.50 | 12.63 | 12.71 | 12.91 | 3.51E-17  | 6.46E-14 | 1.77E-13 | 1.41E-10 | 9.84E-01 | 6.38E-01 | 8.35E-01 |
| 519.27161 | 180.82 | 14.39 | 13.42 | 13.21 | 13.48 | 6.68E-07  | 1.03E-04 | 9.15E-07 | 4.89E-04 | 7.70E-01 | 9.93E-01 | 6.23E-01 |
| 519.76013 | 60.27  | 15.86 | 14.41 | 17.31 | 16.93 | 1.66E-28  | 5.24E-09 | 3.50E-09 | 3.62E-05 | 5.33E-15 | 3.67E-14 | 3.85E-01 |
| 519.82021 | 53.26  | 15.24 | 16.11 | 16.79 | 16.55 | 2.94E-31  | 9.28E-12 | 5.11E-15 | 2.71E-14 | 1.45E-07 | 2.18E-03 | 1.86E-01 |
| 519.91659 | 46.33  | 15.62 | 16.99 | 17.57 | 17.12 | 1.05E-25  | 7.35E-14 | 7.33E-15 | 4.33E-14 | 3.93E-03 | 8.85E-01 | 4.68E-02 |
| 520.09184 | 29.67  | 11.88 | 14.98 | 15.45 | 12.95 | 3.53E-24  | 4.26E-14 | 3.33E-14 | 1.18E-02 | 5.19E-01 | 1.89E-07 | 8.92E-11 |
| 520.24558 | 220.04 | 15.79 | 16.46 | 15.73 | 16.12 | 3.78E-03  | 1.11E-02 | 9.92E-01 | 4.43E-01 | 5.59E-03 | 4.40E-01 | 3.08E-01 |
| 520.2672  | 207.39 | 19.07 | 19.63 | 19.57 | 19.20 | 2.20E-04  | 8.62E-04 | 4.02E-03 | 8.23E-01 | 9.69E-01 | 2.72E-02 | 8.06E-02 |
| 520.73316 | 89     | 13.20 | 12.15 | 12.32 | 12.19 | 2.98E-03  | 6.07E-03 | 3.02E-02 | 1.18E-02 | 9.48E-01 | 9.99E-01 | 9.77E-01 |
| 520.75491 | 59.42  | 19.08 | 19.03 | 20.21 | 19.91 | 5.58E-22  | 9.75E-01 | 4.35E-14 | 2.87E-09 | 4.39E-14 | 8.20E-10 | 9.71E-02 |
| 520.77218 | 53.67  | 19.12 | 19.24 | 20.40 | 20.10 | 1.44E-22  | 7.93E-01 | 4.19E-14 | 2.73E-11 | 4.66E-14 | 1.27E-08 | 1.22E-01 |
| 520.78573 | 129.57 | 13.65 | 9.62  | 9.30  | 10.68 | 1.46E-54  | 5.11E-15 | 5.11E-15 | 5.11E-15 | 5.03E-01 | 5.20E-05 | 6.22E-08 |
| 520.81341 | 54.13  | 17.21 | 16.95 | 17.89 | 17.76 | 2.11E-19  | 4.99E-02 | 2.83E-10 | 1.22E-06 | 4.40E-14 | 3.26E-12 | 5.67E-01 |
| 520.82711 | 46.51  | 14.23 | 12.87 | 13.54 | 14.39 | 6.67E-05  | 4.86E-04 | 1.73E-01 | 9.68E-01 | 2.16E-01 | 1.88E-04 | 8.13E-02 |
| 520.86561 | 35.48  | 14.43 | 15.33 | 15.47 | 15.20 | 6.28E-04  | 5.38E-03 | 7.41E-04 | 2.76E-02 | 9.57E-01 | 9.72E-01 | 7.86E-01 |
| 520.89001 | 41.65  | 17.40 | 18.80 | 18.44 | 18.66 | 6.13E-13  | 8.40E-12 | 3.07E-07 | 1.67E-09 | 2.35E-01 | 9.00E-01 | 6.62E-01 |
| 520.91087 | 41.24  | 15.96 | 18.82 | 18.62 | 18.64 | 3.85E-22  | 4.35E-14 | 4.19E-14 | 4.43E-14 | 9.03E-01 | 9.36E-01 | 1.00E+00 |
| 520.93657 | 59.25  | 13.15 | 13.40 | 15.22 | 15.22 | 1.39E-15  | 8.23E-01 | 5.05E-11 | 2.04E-10 | 2.03E-08 | 5.59E-08 | 1.00E+00 |
| 520.99408 | 68.35  | 13.42 | 15.41 | 11.37 | 12.16 | 4.38E-65  | 6.00E-15 | 5.33E-15 | 6.23E-12 | 5.11E-15 | 5.11E-15 | 3.40E-05 |
| 521.03492 | 31.02  | 19.16 | 18.70 | 18.48 | 18.22 | 1.52E-06  | 3.32E-02 | 4.01E-04 | 7.63E-07 | 5.96E-01 | 3.61E-02 | 4.30E-01 |
| 521.22949 | 163.9  | 14.93 | 15.44 | 15.76 | 14.80 | 1.57E-06  | 3.13E-02 | 6.88E-05 | 9.06E-01 | 3.54E-01 | 6.64E-03 | 1.04E-05 |
| 521.27055 | 210.95 | 16.61 | 16.98 | 16.94 | 16.60 | 3.56E-02  | 1.22E-01 | 1.75E-01 | 1.00E+00 | 9.98E-01 | 1.32E-01 | 1.86E-01 |

|           |        |       |       |       |       |           |          |          |          |          |          |          |
|-----------|--------|-------|-------|-------|-------|-----------|----------|----------|----------|----------|----------|----------|
| 521.27162 | 152.51 | 18.63 | 16.35 | 17.22 | 17.30 | 1.34E-23  | 7.99E-15 | 1.68E-11 | 7.79E-10 | 7.15E-05 | 2.51E-05 | 9.80E-01 |
| 521.28902 | 169.97 | 12.28 | 9.98  | 12.53 | 10.94 | 2.15E-10  | 6.54E-08 | 9.12E-01 | 4.81E-03 | 3.89E-09 | 9.01E-02 | 6.40E-04 |
| 521.31178 | 186.08 | 14.49 | 14.32 | 14.87 | 11.82 | 1.31E-13  | 9.63E-01 | 7.40E-01 | 1.46E-10 | 4.65E-01 | 5.81E-09 | 1.02E-12 |
| 521.75817 | 62.55  | 13.73 | 11.91 | 15.45 | 14.74 | 2.43E-25  | 9.56E-09 | 5.14E-08 | 4.35E-03 | 7.55E-15 | 4.31E-14 | 9.43E-02 |
| 521.77563 | 60.03  | 14.18 | 12.63 | 15.73 | 15.40 | 2.05E-24  | 1.70E-07 | 1.47E-07 | 1.14E-04 | 1.98E-14 | 4.19E-14 | 6.30E-01 |
| 521.91584 | 51.33  | 12.23 | 12.16 | 12.99 | 14.11 | 3.92E-05  | 9.98E-01 | 2.68E-01 | 1.33E-04 | 2.16E-01 | 1.08E-04 | 5.87E-02 |
| 521.93376 | 58.52  | 13.69 | 15.56 | 16.95 | 16.17 | 4.71E-27  | 5.83E-11 | 5.33E-15 | 4.27E-14 | 2.58E-06 | 1.20E-01 | 2.52E-02 |
| 521.99664 | 33.77  | 11.47 | 16.41 | 16.44 | 14.61 | 3.84E-36  | 5.11E-15 | 5.11E-15 | 6.18E-14 | 1.00E+00 | 2.16E-05 | 1.32E-05 |
| 522.05641 | 24.11  | 12.24 | 17.45 | 17.52 | 16.32 | 3.31E-56  | 5.11E-15 | 5.11E-15 | 5.11E-15 | 9.96E-01 | 5.92E-04 | 2.14E-04 |
| 522.08941 | 18.64  | 13.27 | 17.04 | 15.05 | 14.00 | 6.06E-10  | 3.17E-10 | 6.31E-03 | 5.58E-01 | 2.45E-03 | 1.91E-06 | 2.60E-01 |
| 522.26137 | 192.94 | 16.11 | 16.01 | 16.34 | 15.50 | 3.04E-06  | 9.11E-01 | 3.86E-01 | 4.75E-04 | 1.28E-01 | 6.69E-03 | 8.33E-07 |
| 522.28439 | 167.96 | 22.46 | 21.40 | 21.72 | 21.75 | 3.64E-20  | 3.89E-14 | 1.34E-11 | 3.94E-10 | 1.32E-02 | 6.90E-03 | 9.90E-01 |
| 522.75274 | 60.5   | 15.98 | 14.06 | 17.16 | 16.78 | 1.94E-30  | 9.15E-14 | 2.62E-06 | 4.24E-03 | 5.11E-15 | 2.11E-14 | 3.90E-01 |
| 522.76971 | 54.88  | 18.03 | 17.61 | 19.09 | 18.80 | 2.09E-26  | 5.30E-03 | 5.86E-14 | 5.75E-08 | 1.33E-14 | 4.26E-14 | 1.19E-01 |
| 522.78525 | 48.69  | 18.33 | 17.79 | 18.43 | 18.70 | 1.17E-08  | 4.23E-04 | 8.54E-01 | 3.77E-02 | 2.27E-05 | 4.11E-09 | 2.37E-01 |
| 522.80608 | 54.11  | 12.94 | 6.83  | 9.76  | 11.50 | 1.84E-20  | 3.82E-14 | 4.22E-07 | 7.08E-02 | 7.42E-06 | 3.18E-12 | 2.26E-02 |
| 522.80648 | 149.79 | 11.77 | 4.22  | 4.82  | 7.06  | 2.25E-34  | 5.11E-15 | 5.11E-15 | 7.42E-14 | 7.00E-01 | 9.90E-06 | 7.11E-04 |
| 522.84824 | 37.91  | 20.95 | 22.85 | 22.59 | 22.53 | 3.09E-36  | 5.11E-15 | 5.77E-15 | 1.29E-14 | 2.01E-01 | 9.89E-02 | 9.78E-01 |
| 522.90565 | 41.97  | 15.16 | 16.56 | 16.40 | 16.68 | 3.44E-12  | 2.33E-09 | 9.31E-08 | 2.20E-10 | 8.89E-01 | 9.43E-01 | 5.81E-01 |
| 523.0114  | 64.88  | 12.46 | 15.11 | 10.44 | 11.19 | 6.40E-90  | 5.11E-15 | 5.11E-15 | 4.42E-14 | 5.11E-15 | 5.11E-15 | 2.27E-06 |
| 523.03066 | 25.33  | 15.99 | 13.84 | 13.30 | 13.19 | 2.86E-13  | 2.29E-07 | 5.64E-11 | 4.36E-11 | 4.98E-01 | 3.57E-01 | 9.92E-01 |
| 523.05261 | 17.75  | 12.72 | 14.93 | 15.24 | 16.70 | 1.90E-13  | 1.79E-05 | 6.10E-07 | 7.68E-14 | 9.16E-01 | 1.98E-03 | 1.45E-02 |
| 523.28667 | 168.15 | 20.50 | 19.32 | 19.68 | 19.70 | 8.96E-23  | 1.87E-14 | 5.77E-13 | 8.93E-12 | 5.07E-03 | 4.07E-03 | 9.98E-01 |
| 523.33175 | 255.38 | 21.93 | 21.67 | 21.69 | 21.30 | 1.19E-03  | 3.14E-01 | 3.58E-01 | 3.26E-04 | 1.00E+00 | 8.74E-02 | 6.63E-02 |
| 523.85184 | 43.69  | 16.68 | 19.01 | 18.81 | 18.68 | 6.36E-36  | 5.11E-15 | 5.11E-15 | 1.22E-14 | 6.46E-01 | 2.52E-01 | 8.86E-01 |
| 523.94301 | 28.91  | 11.32 | 11.64 | 12.84 | 12.01 | 1.28E-02  | 9.08E-01 | 7.96E-03 | 4.87E-01 | 6.74E-02 | 8.77E-01 | 3.50E-01 |
| 524.05602 | 18.25  | 14.25 | 16.42 | 16.72 | 17.17 | 2.10E-12  | 3.79E-07 | 4.93E-09 | 2.61E-11 | 8.79E-01 | 2.66E-01 | 6.84E-01 |
| 524.07815 | 21.22  | 11.44 | 13.51 | 12.74 | 11.16 | 8.98E-07  | 3.93E-05 | 1.99E-02 | 9.32E-01 | 3.34E-01 | 8.37E-06 | 5.09E-03 |
| 524.17726 | 25.11  | 15.51 | 14.35 | 15.71 | 14.91 | 3.21E-03  | 1.63E-02 | 9.51E-01 | 4.38E-01 | 3.76E-03 | 5.17E-01 | 1.99E-01 |
| 524.24216 | 290.14 | 15.94 | 15.71 | 15.41 | 15.80 | 5.58E-01  | 9.28E-01 | 4.94E-01 | 9.86E-01 | 8.68E-01 | 9.95E-01 | 7.48E-01 |
| 524.27893 | 194.46 | 23.72 | 23.63 | 24.02 | 23.43 | 6.26E-05  | 8.78E-01 | 5.39E-02 | 8.09E-02 | 8.06E-03 | 3.69E-01 | 1.95E-05 |
| 524.29997 | 173.81 | 23.79 | 23.08 | 23.27 | 23.23 | 2.75E-03  | 2.36E-03 | 3.97E-02 | 3.06E-02 | 7.99E-01 | 8.97E-01 | 9.98E-01 |
| 524.33483 | 247.13 | 19.82 | 19.55 | 19.40 | 19.20 | 2.04E-02  | 5.08E-01 | 1.37E-01 | 1.23E-02 | 8.81E-01 | 3.36E-01 | 7.65E-01 |
| 524.76647 | 70.43  | 15.94 | 14.52 | 15.49 | 15.43 | 6.54E-18  | 4.33E-14 | 7.83E-03 | 2.70E-03 | 1.05E-09 | 3.50E-08 | 9.75E-01 |
| 524.7853  | 51.71  | 18.84 | 18.41 | 18.62 | 18.78 | 8.11E-02  | 6.95E-02 | 5.89E-01 | 9.87E-01 | 6.37E-01 | 1.90E-01 | 8.24E-01 |
| 524.82331 | 143.76 | 13.81 | 9.28  | 8.29  | 11.05 | 1.61E-25  | 4.40E-14 | 9.33E-15 | 2.29E-07 | 1.68E-01 | 2.50E-03 | 3.64E-07 |
| 524.84572 | 44.27  | 18.33 | 19.85 | 19.63 | 19.62 | 1.37E-29  | 5.77E-15 | 3.44E-14 | 4.22E-14 | 2.97E-01 | 2.74E-01 | 1.00E+00 |
| 524.86395 | 44.08  | 18.16 | 20.50 | 20.29 | 20.21 | 3.73E-37  | 5.11E-15 | 5.11E-15 | 6.88E-15 | 5.85E-01 | 3.48E-01 | 9.72E-01 |
| 524.89953 | 40     | 14.08 | 15.48 | 15.21 | 15.87 | 2.81E-09  | 2.89E-06 | 1.96E-04 | 3.54E-09 | 7.66E-01 | 5.09E-01 | 9.08E-02 |
| 524.94582 | 70.89  | 13.68 | 16.21 | 11.68 | 12.36 | 8.69E-101 | 5.11E-15 | 5.11E-15 | 2.62E-14 | 5.11E-15 | 5.11E-15 | 3.02E-07 |
| 525.05355 | 19.44  | 13.17 | 14.20 | 13.10 | 13.91 | 2.29E-02  | 6.31E-02 | 9.99E-01 | 3.01E-01 | 4.95E-02 | 9.10E-01 | 2.50E-01 |
| 525.10738 | 84.9   | 10.54 | 11.43 | 14.30 | 14.19 | 9.18E-23  | 1.08E-01 | 4.26E-14 | 4.23E-14 | 6.88E-11 | 1.36E-09 | 9.92E-01 |
| 525.28224 | 193.64 | 21.93 | 21.83 | 22.23 | 21.65 | 9.24E-05  | 8.42E-01 | 5.74E-02 | 1.04E-01 | 6.79E-03 | 4.75E-01 | 3.47E-05 |
| 525.30337 | 179.08 | 21.80 | 21.08 | 21.30 | 21.27 | 2.95E-03  | 1.84E-03 | 5.26E-02 | 4.93E-02 | 6.99E-01 | 7.84E-01 | 9.99E-01 |
| 525.33048 | 265.05 | 15.74 | 16.03 | 15.61 | 15.84 | 3.14E-01  | 5.57E-01 | 9.36E-01 | 9.75E-01 | 2.52E-01 | 8.38E-01 | 7.69E-01 |

|           |        |       |       |       |       |           |          |          |          |          |          |          |
|-----------|--------|-------|-------|-------|-------|-----------|----------|----------|----------|----------|----------|----------|
| 525.86551 | 42.58  | 13.49 | 16.18 | 15.65 | 15.71 | 3.87E-14  | 4.42E-13 | 3.36E-09 | 4.69E-09 | 4.10E-01 | 5.39E-01 | 9.98E-01 |
| 526.2574  | 192.35 | 14.40 | 16.12 | 15.91 | 14.59 | 8.78E-24  | 4.31E-14 | 5.11E-14 | 7.09E-01 | 6.19E-01 | 1.27E-13 | 7.61E-11 |
| 526.28565 | 196.82 | 18.75 | 18.26 | 18.83 | 18.31 | 2.73E-05  | 2.91E-03 | 9.38E-01 | 1.07E-02 | 4.69E-04 | 9.91E-01 | 2.06E-03 |
| 526.2948  | 199.93 | 21.45 | 22.04 | 22.26 | 21.17 | 1.94E-16  | 1.83E-05 | 1.67E-09 | 1.27E-01 | 3.11E-01 | 1.18E-09 | 7.26E-14 |
| 526.30636 | 179.68 | 18.64 | 18.10 | 18.31 | 18.31 | 1.58E-01  | 1.07E-01 | 4.95E-01 | 5.24E-01 | 8.25E-01 | 8.39E-01 | 1.00E+00 |
| 526.31567 | 210.69 | 21.14 | 20.81 | 20.68 | 20.55 | 1.56E-05  | 3.40E-02 | 6.39E-04 | 1.32E-05 | 6.63E-01 | 1.44E-01 | 7.25E-01 |
| 526.7231  | 68.26  | 16.89 | 17.39 | 18.04 | 17.47 | 1.12E-11  | 4.79E-03 | 7.40E-13 | 8.77E-04 | 1.07E-04 | 9.47E-01 | 1.43E-03 |
| 526.74376 | 93.33  | 12.54 | 13.21 | 14.36 | 13.46 | 4.12E-07  | 1.34E-01 | 6.33E-08 | 2.12E-02 | 1.88E-03 | 8.72E-01 | 2.92E-02 |
| 526.78298 | 63.61  | 17.20 | 15.93 | 16.90 | 16.63 | 4.84E-19  | 4.13E-14 | 8.68E-02 | 7.68E-05 | 3.05E-12 | 1.54E-06 | 1.45E-01 |
| 526.80135 | 55.22  | 20.33 | 20.58 | 20.26 | 20.41 | 2.68E-02  | 8.43E-02 | 9.30E-01 | 8.53E-01 | 2.01E-02 | 4.56E-01 | 5.24E-01 |
| 526.8384  | 43.2   | 14.58 | 13.09 | 14.20 | 13.81 | 2.91E-05  | 1.14E-05 | 5.78E-01 | 6.82E-02 | 2.61E-03 | 1.16E-01 | 6.22E-01 |
| 526.85951 | 43.59  | 17.31 | 19.63 | 19.67 | 19.63 | 3.44E-43  | 5.11E-15 | 5.11E-15 | 5.11E-15 | 9.95E-01 | 1.00E+00 | 9.93E-01 |
| 526.8768  | 29.11  | 11.76 | 13.80 | 14.14 | 12.71 | 9.78E-06  | 3.74E-04 | 1.76E-05 | 2.56E-01 | 9.10E-01 | 1.67E-01 | 3.40E-02 |
| 526.91841 | 46.86  | 15.87 | 14.07 | 14.81 | 14.02 | 3.57E-03  | 7.75E-03 | 2.21E-01 | 7.46E-03 | 5.66E-01 | 1.00E+00 | 5.27E-01 |
| 526.93935 | 33.67  | 10.75 | 12.56 | 13.52 | 12.44 | 3.90E-07  | 1.02E-03 | 8.80E-08 | 3.55E-03 | 2.00E-01 | 9.95E-01 | 1.33E-01 |
| 527.16907 | 57.42  | 15.99 | 20.60 | 15.09 | 15.34 | 6.35E-128 | 5.11E-15 | 1.02E-13 | 1.41E-07 | 5.11E-15 | 5.11E-15 | 1.29E-01 |
| 527.23941 | 187.69 | 14.69 | 12.92 | 11.50 | 13.57 | 1.93E-14  | 1.33E-05 | 4.53E-14 | 1.58E-02 | 1.09E-03 | 3.33E-01 | 1.01E-06 |
| 527.26142 | 192.95 | 9.75  | 13.10 | 12.55 | 10.16 | 4.55E-21  | 4.29E-14 | 1.12E-12 | 6.94E-01 | 4.51E-01 | 2.18E-12 | 6.83E-09 |
| 527.28759 | 193.85 | 15.67 | 14.78 | 15.40 | 15.02 | 7.82E-10  | 1.12E-09 | 1.61E-01 | 2.41E-05 | 5.77E-05 | 3.05E-01 | 4.14E-02 |
| 527.29799 | 199.47 | 19.64 | 20.18 | 20.41 | 19.38 | 3.46E-14  | 1.32E-04 | 1.84E-08 | 2.18E-01 | 2.98E-01 | 5.24E-08 | 2.10E-12 |
| 527.30846 | 173.8  | 15.59 | 14.42 | 14.66 | 14.88 | 9.02E-05  | 6.42E-05 | 2.19E-03 | 4.23E-02 | 7.98E-01 | 3.33E-01 | 8.50E-01 |
| 527.31939 | 211.3  | 19.16 | 18.18 | 17.71 | 18.49 | 2.70E-16  | 1.18E-08 | 4.24E-14 | 2.22E-04 | 1.72E-02 | 2.55E-01 | 2.07E-05 |
| 527.35548 | 191.5  | 15.51 | 18.86 | 18.97 | 18.12 | 1.20E-44  | 5.11E-15 | 5.11E-15 | 7.77E-15 | 9.61E-01 | 5.98E-03 | 1.01E-03 |
| 527.80453 | 59.11  | 15.50 | 14.55 | 15.53 | 15.31 | 2.46E-07  | 1.79E-06 | 9.99E-01 | 7.17E-01 | 1.56E-06 | 5.32E-04 | 6.49E-01 |
| 527.84105 | 34.63  | 15.48 | 13.45 | 13.48 | 13.30 | 8.13E-09  | 1.34E-06 | 1.43E-06 | 3.78E-07 | 1.00E+00 | 9.81E-01 | 9.71E-01 |
| 527.86587 | 39.58  | 11.46 | 13.06 | 12.78 | 13.56 | 2.95E-12  | 5.30E-08 | 8.52E-06 | 4.04E-12 | 7.20E-01 | 2.96E-01 | 2.83E-02 |
| 527.9418  | 31.27  | 11.06 | 12.20 | 14.16 | 10.79 | 9.51E-28  | 2.58E-04 | 1.60E-14 | 7.76E-01 | 1.71E-10 | 1.22E-05 | 1.04E-14 |
| 528.10775 | 24.87  | 17.73 | 17.34 | 17.56 | 17.06 | 8.10E-04  | 7.66E-02 | 7.08E-01 | 4.79E-04 | 5.44E-01 | 3.76E-01 | 2.00E-02 |
| 528.17322 | 57.63  | 15.61 | 17.48 | 14.68 | 14.95 | 8.43E-84  | 5.11E-15 | 3.93E-14 | 8.85E-11 | 5.11E-15 | 5.11E-15 | 2.68E-02 |
| 528.27317 | 202.68 | 19.15 | 21.07 | 20.92 | 19.89 | 4.36E-31  | 5.33E-15 | 1.18E-14 | 2.44E-05 | 7.81E-01 | 3.48E-11 | 4.89E-09 |
| 528.29341 | 201.37 | 19.11 | 18.43 | 18.61 | 18.60 | 8.52E-09  | 7.89E-09 | 2.56E-05 | 4.30E-05 | 3.62E-01 | 4.18E-01 | 1.00E+00 |
| 528.31025 | 210.62 | 21.12 | 21.84 | 21.95 | 21.18 | 1.29E-13  | 4.95E-08 | 2.77E-10 | 9.64E-01 | 8.29E-01 | 2.48E-06 | 2.92E-08 |
| 528.32288 | 196.9  | 14.54 | 9.05  | 9.55  | 10.59 | 2.70E-36  | 5.11E-15 | 5.11E-15 | 4.16E-14 | 5.73E-01 | 1.02E-03 | 4.99E-02 |
| 528.35788 | 190.2  | 12.93 | 14.99 | 14.95 | 14.23 | 7.65E-14  | 7.09E-12 | 9.67E-12 | 3.54E-05 | 9.99E-01 | 4.37E-02 | 5.57E-02 |
| 528.72139 | 70.47  | 14.89 | 15.89 | 15.88 | 15.44 | 1.64E-08  | 2.50E-07 | 2.62E-07 | 1.49E-02 | 1.00E+00 | 7.10E-02 | 7.80E-02 |
| 528.73876 | 71.93  | 17.07 | 17.76 | 17.77 | 17.63 | 2.50E-07  | 3.64E-06 | 2.37E-06 | 4.37E-04 | 1.00E+00 | 7.80E-01 | 7.53E-01 |
| 528.79656 | 40.05  | 18.60 | 18.51 | 18.95 | 18.63 | 3.46E-03  | 9.10E-01 | 1.85E-02 | 9.92E-01 | 2.99E-03 | 8.03E-01 | 6.01E-02 |
| 528.85487 | 139.04 | 12.54 | 5.33  | 5.00  | 6.86  | 4.04E-46  | 5.11E-15 | 5.11E-15 | 6.00E-15 | 8.85E-01 | 7.96E-03 | 5.82E-04 |
| 528.85489 | 36.41  | 15.29 | 15.88 | 16.25 | 16.44 | 1.96E-07  | 1.92E-02 | 1.44E-05 | 3.97E-07 | 2.65E-01 | 4.17E-02 | 8.05E-01 |
| 528.87692 | 38.93  | 18.51 | 18.49 | 18.54 | 18.84 | 2.74E-01  | 9.99E-01 | 9.99E-01 | 3.38E-01 | 9.93E-01 | 2.97E-01 | 4.33E-01 |
| 528.89741 | 42.82  | 16.30 | 18.00 | 18.19 | 18.03 | 7.21E-28  | 4.10E-14 | 1.20E-14 | 4.14E-14 | 6.71E-01 | 9.98E-01 | 7.86E-01 |
| 528.98319 | 65.12  | 14.42 | 16.59 | 12.88 | 13.38 | 1.25E-120 | 5.11E-15 | 5.11E-15 | 5.11E-15 | 5.11E-15 | 5.11E-15 | 8.32E-09 |
| 529.0232  | 60.66  | 13.34 | 20.63 | 11.48 | 12.00 | 1.49E-150 | 5.11E-15 | 5.11E-15 | 4.26E-14 | 5.11E-15 | 5.11E-15 | 2.58E-03 |
| 529.16778 | 65.91  | 13.90 | 14.68 | 12.06 | 12.70 | 9.92E-71  | 2.06E-12 | 5.11E-15 | 1.31E-14 | 5.11E-15 | 5.11E-15 | 2.96E-08 |
| 529.26997 | 291.55 | 15.00 | 15.08 | 15.55 | 15.89 | 1.29E-02  | 9.93E-01 | 2.31E-01 | 1.79E-02 | 3.94E-01 | 4.62E-02 | 6.88E-01 |



|           |        |       |       |       |       |           |          |          |          |          |          |          |
|-----------|--------|-------|-------|-------|-------|-----------|----------|----------|----------|----------|----------|----------|
| 529.29619 | 192.08 | 17.05 | 16.53 | 17.18 | 16.66 | 3.58E-03  | 4.18E-02 | 9.10E-01 | 2.09E-01 | 7.27E-03 | 9.26E-01 | 5.57E-02 |
| 529.31384 | 210.6  | 19.32 | 20.00 | 20.09 | 19.14 | 1.45E-13  | 2.91E-06 | 7.79E-08 | 5.25E-01 | 9.14E-01 | 1.34E-08 | 2.75E-10 |
| 529.42453 | 227.08 | 15.79 | 11.35 | 10.71 | 13.11 | 1.96E-24  | 4.43E-14 | 2.00E-14 | 1.85E-07 | 5.14E-01 | 1.75E-03 | 5.76E-06 |
| 529.71993 | 16.74  | 11.01 | 12.37 | 12.81 | 11.06 | 6.07E-06  | 5.32E-03 | 7.17E-05 | 9.99E-01 | 7.09E-01 | 1.35E-02 | 3.12E-04 |
| 529.87209 | 37.64  | 14.05 | 14.08 | 14.11 | 14.49 | 1.98E-01  | 9.99E-01 | 9.93E-01 | 2.03E-01 | 9.99E-01 | 2.85E-01 | 3.41E-01 |
| 530.02706 | 61.28  | 13.44 | 17.11 | 11.51 | 12.20 | 7.23E-140 | 5.11E-15 | 5.11E-15 | 5.11E-15 | 5.11E-15 | 5.11E-15 | 6.56E-11 |
| 530.0673  | 22.17  | 12.91 | 13.60 | 14.43 | 14.69 | 5.71E-04  | 4.27E-01 | 4.84E-03 | 9.95E-04 | 2.84E-01 | 1.07E-01 | 9.46E-01 |
| 530.10666 | 24.62  | 12.12 | 14.20 | 14.70 | 13.44 | 2.51E-09  | 2.55E-06 | 2.43E-09 | 7.63E-03 | 5.96E-01 | 2.79E-01 | 1.45E-02 |
| 530.28349 | 206.08 | 16.92 | 16.74 | 16.49 | 16.27 | 8.86E-04  | 7.01E-01 | 4.24E-02 | 6.79E-04 | 4.31E-01 | 2.92E-02 | 5.42E-01 |
| 530.30271 | 240.54 | 22.77 | 18.58 | 17.60 | 19.06 | 1.27E-65  | 5.11E-15 | 5.11E-15 | 5.11E-15 | 8.14E-05 | 1.50E-01 | 3.63E-09 |
| 530.31799 | 213.01 | 16.09 | 16.94 | 17.11 | 15.95 | 1.98E-07  | 1.47E-03 | 5.70E-05 | 9.29E-01 | 8.73E-01 | 3.20E-04 | 1.17E-05 |
| 530.73546 | 75     | 15.70 | 15.68 | 16.14 | 15.74 | 1.11E-04  | 9.95E-01 | 5.67E-04 | 9.89E-01 | 3.63E-04 | 9.53E-01 | 3.73E-03 |
| 530.76905 | 69.66  | 8.28  | 7.64  | 13.05 | 12.69 | 3.83E-22  | 6.90E-01 | 1.72E-13 | 2.98E-11 | 4.32E-14 | 2.09E-13 | 9.36E-01 |
| 530.79188 | 39.92  | 16.24 | 16.16 | 16.79 | 16.02 | 6.92E-06  | 9.51E-01 | 1.46E-03 | 4.59E-01 | 3.00E-04 | 7.94E-01 | 8.47E-06 |
| 530.81349 | 62.96  | 17.42 | 16.62 | 17.70 | 17.67 | 9.58E-24  | 2.11E-13 | 2.43E-02 | 7.47E-02 | 3.44E-14 | 4.11E-14 | 9.89E-01 |
| 530.81423 | 138.4  | 14.70 | 10.55 | 9.83  | 12.63 | 2.14E-31  | 2.20E-14 | 5.11E-15 | 8.55E-07 | 2.29E-01 | 1.55E-06 | 5.05E-11 |
| 530.83512 | 52.66  | 19.98 | 20.38 | 20.97 | 20.88 | 9.30E-25  | 7.17E-05 | 2.64E-14 | 4.09E-14 | 7.99E-09 | 2.55E-06 | 7.93E-01 |
| 530.87406 | 49.84  | 15.76 | 13.98 | 14.54 | 15.20 | 8.68E-06  | 5.92E-06 | 3.24E-03 | 4.18E-01 | 4.13E-01 | 6.60E-03 | 2.76E-01 |
| 530.93279 | 59.54  | 12.26 | 11.39 | 13.74 | 14.48 | 5.30E-10  | 2.28E-01 | 6.08E-03 | 1.79E-05 | 4.84E-06 | 3.73E-09 | 3.96E-01 |
| 530.96046 | 57     | 12.08 | 18.59 | 10.08 | 10.69 | 2.08E-152 | 5.11E-15 | 5.11E-15 | 3.24E-14 | 5.11E-15 | 5.11E-15 | 3.57E-05 |
| 530.97759 | 67.92  | 13.02 | 14.13 | 10.85 | 11.53 | 3.07E-64  | 2.95E-13 | 5.11E-15 | 3.89E-14 | 5.11E-15 | 5.11E-15 | 2.79E-05 |
| 531.02094 | 61.37  | 9.50  | 16.97 | 8.70  | 9.70  | 3.06E-97  | 5.11E-15 | 3.75E-03 | 8.36E-01 | 5.11E-15 | 5.11E-15 | 3.54E-04 |
| 531.27322 | 156.36 | 22.52 | 22.18 | 22.43 | 22.05 | 3.71E-03  | 6.92E-02 | 9.19E-01 | 5.53E-03 | 2.82E-01 | 7.99E-01 | 4.11E-02 |
| 531.30633 | 248.12 | 20.64 | 14.70 | 13.63 | 15.84 | 1.98E-55  | 5.11E-15 | 5.11E-15 | 5.11E-15 | 1.33E-02 | 9.66E-03 | 1.94E-08 |
| 531.83821 | 52.46  | 15.87 | 16.00 | 16.64 | 16.62 | 6.96E-13  | 7.14E-01 | 1.38E-09 | 1.12E-08 | 9.51E-07 | 4.43E-06 | 9.99E-01 |
| 531.93272 | 33.4   | 12.52 | 14.54 | 14.31 | 13.82 | 7.42E-07  | 1.61E-06 | 2.18E-05 | 5.63E-03 | 9.35E-01 | 2.78E-01 | 6.06E-01 |
| 531.95328 | 26.11  | 15.43 | 11.59 | 12.21 | 14.01 | 3.32E-09  | 1.49E-08 | 1.92E-06 | 1.16E-01 | 7.63E-01 | 1.45E-03 | 2.86E-02 |
| 531.96362 | 72.67  | 8.26  | 14.22 | 11.28 | 10.22 | 4.20E-35  | 5.11E-15 | 6.71E-13 | 7.84E-06 | 8.24E-12 | 4.34E-14 | 4.40E-02 |
| 531.98333 | 24.98  | 10.24 | 14.89 | 15.30 | 14.19 | 2.88E-48  | 5.11E-15 | 5.11E-15 | 5.11E-15 | 5.05E-01 | 9.54E-02 | 1.52E-03 |
| 532.27681 | 154.52 | 20.61 | 20.19 | 20.47 | 20.10 | 1.35E-03  | 1.53E-02 | 7.53E-01 | 2.80E-03 | 1.96E-01 | 9.37E-01 | 5.90E-02 |
| 532.29999 | 244.02 | 20.89 | 15.27 | 13.61 | 16.15 | 4.93E-65  | 5.11E-15 | 5.11E-15 | 5.11E-15 | 8.55E-07 | 3.01E-02 | 2.64E-13 |
| 532.74867 | 74.88  | 15.78 | 13.28 | 14.92 | 14.98 | 4.18E-39  | 5.11E-15 | 1.01E-07 | 1.83E-06 | 3.40E-14 | 3.31E-14 | 9.83E-01 |
| 532.77282 | 62.62  | 17.74 | 16.62 | 18.16 | 18.17 | 5.37E-25  | 2.12E-13 | 1.26E-02 | 1.53E-02 | 2.89E-14 | 3.60E-14 | 1.00E+00 |
| 532.79344 | 46.87  | 20.60 | 21.33 | 22.12 | 21.86 | 2.07E-35  | 1.89E-10 | 5.11E-15 | 9.99E-15 | 1.11E-11 | 1.42E-05 | 7.92E-02 |
| 532.81261 | 46.64  | 17.16 | 17.37 | 18.12 | 17.94 | 2.05E-36  | 1.43E-02 | 5.11E-15 | 2.49E-14 | 3.44E-14 | 7.41E-13 | 6.20E-02 |
| 532.832   | 53.69  | 18.30 | 18.61 | 19.04 | 19.05 | 3.15E-17  | 2.87E-03 | 7.25E-14 | 1.45E-13 | 2.48E-05 | 3.24E-05 | 1.00E+00 |
| 532.95817 | 57.07  | 11.24 | 16.49 | 15.54 | 14.12 | 2.32E-27  | 5.77E-15 | 4.29E-14 | 1.84E-09 | 1.31E-01 | 1.75E-06 | 8.31E-03 |
| 533.10699 | 17.73  | 14.27 | 17.53 | 16.38 | 15.56 | 2.54E-14  | 5.12E-14 | 2.79E-07 | 5.53E-03 | 1.65E-02 | 8.26E-06 | 1.59E-01 |
| 533.28568 | 167.11 | 20.23 | 19.64 | 19.96 | 19.61 | 7.40E-07  | 1.14E-05 | 1.16E-01 | 7.71E-06 | 4.58E-02 | 9.97E-01 | 3.13E-02 |
| 533.30365 | 239.53 | 18.31 | 13.07 | 11.31 | 13.98 | 6.22E-55  | 5.11E-15 | 5.11E-15 | 5.33E-15 | 2.89E-06 | 4.75E-02 | 2.95E-12 |
| 533.45638 | 262.65 | 19.33 | 18.39 | 18.50 | 18.90 | 7.11E-18  | 4.26E-14 | 2.17E-13 | 4.57E-04 | 7.61E-01 | 2.92E-05 | 1.21E-03 |
| 533.79676 | 55.21  | 16.49 | 17.20 | 18.15 | 17.88 | 1.66E-30  | 4.54E-07 | 5.11E-15 | 3.84E-14 | 2.70E-11 | 5.67E-06 | 1.70E-01 |
| 533.87535 | 38.1   | 16.80 | 17.86 | 17.90 | 17.26 | 9.63E-18  | 1.16E-13 | 4.75E-14 | 3.54E-03 | 9.87E-01 | 6.95E-05 | 1.38E-05 |
| 533.95506 | 53.31  | 13.71 | 16.52 | 17.37 | 16.18 | 5.57E-32  | 3.69E-14 | 5.11E-15 | 4.45E-14 | 1.04E-02 | 6.07E-01 | 1.48E-04 |
| 534.22462 | 176.33 | 14.15 | 14.00 | 14.71 | 13.39 | 3.34E-03  | 9.70E-01 | 3.26E-01 | 1.21E-01 | 1.60E-01 | 3.08E-01 | 1.12E-03 |

|           |        |       |       |       |       |          |          |          |          |          |          |          |
|-----------|--------|-------|-------|-------|-------|----------|----------|----------|----------|----------|----------|----------|
| 534.28719 | 179.84 | 18.92 | 18.39 | 18.72 | 18.30 | 4.86E-07 | 5.02E-05 | 2.97E-01 | 2.77E-06 | 3.14E-02 | 8.84E-01 | 3.94E-03 |
| 534.34425 | 203.93 | 13.17 | 15.05 | 14.13 | 13.20 | 1.43E-04 | 3.03E-04 | 1.45E-01 | 1.00E+00 | 2.02E-01 | 9.29E-04 | 2.11E-01 |
| 534.45939 | 257.5  | 17.10 | 16.06 | 16.17 | 16.71 | 5.59E-13 | 2.09E-11 | 1.37E-09 | 4.10E-02 | 8.71E-01 | 1.03E-04 | 1.64E-03 |
| 534.75168 | 58.01  | 15.11 | 13.78 | 16.97 | 16.46 | 1.32E-31 | 2.38E-07 | 3.33E-13 | 2.49E-07 | 5.11E-15 | 2.91E-14 | 1.70E-01 |
| 534.76989 | 62.32  | 16.82 | 14.30 | 16.21 | 16.56 | 5.14E-52 | 5.11E-15 | 1.41E-05 | 1.85E-01 | 5.11E-15 | 5.11E-15 | 4.72E-02 |
| 534.79188 | 53.68  | 19.23 | 19.76 | 20.58 | 20.36 | 2.31E-33 | 1.01E-06 | 5.11E-15 | 2.18E-14 | 1.59E-13 | 1.65E-07 | 1.28E-01 |
| 534.81694 | 49.55  | 15.18 | 14.10 | 15.76 | 15.51 | 3.20E-14 | 5.89E-07 | 1.51E-02 | 3.69E-01 | 9.85E-14 | 5.74E-10 | 5.86E-01 |
| 534.85973 | 35.21  | 12.05 | 12.89 | 14.05 | 12.41 | 1.99E-06 | 1.13E-01 | 1.02E-06 | 7.76E-01 | 1.42E-02 | 6.23E-01 | 2.45E-04 |
| 534.90316 | 39.52  | 14.97 | 17.38 | 17.48 | 17.32 | 2.49E-24 | 4.33E-14 | 4.11E-14 | 4.20E-14 | 9.76E-01 | 9.97E-01 | 9.27E-01 |
| 534.9267  | 40.67  | 15.00 | 17.06 | 16.74 | 17.07 | 1.73E-10 | 9.76E-09 | 1.31E-06 | 2.06E-08 | 7.63E-01 | 1.00E+00 | 7.64E-01 |
| 534.94414 | 17.57  | 12.24 | 15.34 | 15.13 | 14.46 | 1.30E-23 | 3.66E-14 | 4.35E-14 | 1.35E-11 | 8.96E-01 | 2.44E-02 | 1.29E-01 |
| 535.29044 | 172.54 | 16.07 | 14.11 | 15.06 | 14.77 | 6.86E-17 | 4.33E-14 | 6.06E-06 | 1.27E-08 | 5.16E-05 | 1.36E-02 | 5.22E-01 |
| 535.30499 | 170.76 | 18.16 | 17.38 | 17.87 | 17.34 | 1.38E-09 | 1.61E-07 | 1.32E-01 | 7.31E-08 | 2.77E-03 | 9.91E-01 | 1.32E-03 |
| 535.47405 | 256.68 | 19.00 | 18.93 | 18.88 | 19.36 | 1.56E-03 | 9.53E-01 | 7.63E-01 | 2.52E-02 | 9.73E-01 | 6.99E-03 | 1.48E-03 |
| 535.79471 | 56.08  | 14.32 | 14.76 | 15.97 | 15.72 | 1.77E-17 | 8.82E-02 | 4.57E-14 | 5.45E-11 | 1.31E-08 | 1.95E-05 | 5.79E-01 |
| 535.89143 | 43.36  | 16.21 | 16.99 | 17.14 | 16.65 | 1.79E-06 | 1.20E-04 | 2.24E-06 | 8.53E-02 | 8.45E-01 | 2.67E-01 | 4.44E-02 |
| 536.24042 | 207.53 | 17.32 | 18.65 | 18.76 | 18.01 | 2.35E-19 | 5.08E-14 | 4.22E-14 | 9.82E-05 | 8.95E-01 | 6.56E-04 | 3.37E-05 |
| 536.29998 | 187.7  | 19.55 | 19.12 | 19.83 | 19.19 | 1.06E-07 | 3.55E-03 | 1.22E-01 | 2.92E-02 | 4.97E-07 | 9.40E-01 | 1.49E-05 |
| 536.30926 | 170.69 | 14.58 | 14.22 | 14.84 | 14.32 | 4.38E-02 | 3.91E-01 | 6.63E-01 | 6.87E-01 | 4.14E-02 | 9.74E-01 | 1.36E-01 |
| 536.47714 | 256.6  | 16.59 | 16.90 | 16.85 | 17.40 | 2.58E-04 | 2.98E-01 | 4.30E-01 | 6.76E-05 | 9.95E-01 | 3.69E-02 | 1.74E-02 |
| 536.749   | 63.85  | 14.16 | 11.73 | 15.35 | 14.80 | 4.44E-40 | 2.49E-14 | 5.98E-07 | 2.37E-02 | 5.11E-15 | 5.11E-15 | 7.81E-02 |
| 536.78822 | 54.54  | 16.33 | 16.14 | 17.31 | 17.01 | 4.55E-22 | 3.59E-01 | 5.20E-14 | 1.19E-07 | 4.10E-14 | 4.96E-11 | 7.50E-02 |
| 536.83932 | 38.97  | 14.37 | 15.33 | 15.88 | 14.22 | 1.27E-04 | 8.08E-02 | 1.11E-03 | 9.84E-01 | 5.43E-01 | 4.57E-02 | 6.18E-04 |
| 536.86446 | 38.68  | 18.50 | 19.70 | 19.49 | 19.60 | 1.21E-17 | 4.49E-14 | 2.31E-11 | 8.94E-13 | 4.28E-01 | 8.98E-01 | 8.64E-01 |
| 536.88495 | 44.26  | 18.30 | 21.11 | 20.99 | 20.91 | 1.19E-29 | 1.02E-14 | 1.78E-14 | 3.69E-14 | 9.66E-01 | 8.62E-01 | 9.87E-01 |
| 536.96608 | 46.36  | 12.43 | 18.23 | 13.14 | 13.31 | 2.71E-54 | 5.11E-15 | 6.68E-02 | 1.76E-02 | 5.11E-15 | 5.11E-15 | 9.43E-01 |
| 537.03914 | 24.26  | 11.38 | 15.20 | 15.32 | 13.70 | 2.58E-33 | 5.11E-15 | 5.11E-15 | 7.13E-12 | 9.79E-01 | 1.90E-05 | 2.66E-06 |
| 537.24298 | 208.87 | 13.99 | 15.95 | 16.02 | 14.85 | 9.27E-13 | 4.08E-10 | 6.49E-11 | 1.83E-02 | 9.95E-01 | 1.96E-03 | 7.30E-04 |
| 537.30275 | 187.9  | 17.29 | 16.71 | 17.24 | 16.79 | 5.40E-03 | 1.87E-02 | 9.95E-01 | 7.09E-02 | 4.21E-02 | 9.77E-01 | 1.32E-01 |
| 537.32047 | 184.29 | 16.80 | 15.85 | 16.44 | 15.99 | 3.10E-11 | 1.89E-10 | 3.82E-02 | 1.42E-07 | 1.90E-04 | 7.52E-01 | 1.05E-02 |
| 537.33239 | 241.58 | 19.63 | 10.24 | 8.46  | 11.40 | 1.21E-65 | 5.11E-15 | 5.11E-15 | 5.11E-15 | 1.57E-03 | 9.51E-02 | 6.22E-08 |
| 537.34742 | 252.59 | 21.46 | 20.52 | 20.33 | 20.34 | 1.21E-15 | 1.47E-09 | 3.37E-13 | 3.13E-12 | 5.52E-01 | 6.41E-01 | 1.00E+00 |
| 537.48963 | 263.24 | 23.18 | 23.14 | 23.13 | 23.12 | 9.51E-01 | 9.84E-01 | 9.64E-01 | 9.51E-01 | 1.00E+00 | 9.98E-01 | 1.00E+00 |
| 537.87004 | 33.81  | 13.30 | 13.02 | 12.38 | 13.52 | 2.62E-02 | 8.77E-01 | 7.04E-02 | 9.43E-01 | 3.55E-01 | 5.90E-01 | 2.27E-02 |
| 537.8874  | 43.51  | 15.15 | 17.08 | 16.88 | 16.99 | 1.15E-21 | 4.21E-14 | 4.55E-14 | 4.24E-14 | 7.46E-01 | 9.76E-01 | 9.43E-01 |
| 537.90379 | 48.87  | 13.23 | 12.61 | 14.70 | 14.84 | 6.65E-17 | 8.90E-02 | 3.99E-07 | 7.09E-08 | 2.25E-12 | 4.76E-13 | 9.54E-01 |
| 537.96475 | 29.99  | 17.19 | 18.52 | 18.64 | 18.03 | 8.04E-35 | 5.33E-15 | 5.11E-15 | 1.20E-12 | 6.61E-01 | 6.89E-05 | 3.07E-07 |
| 538.08437 | 17.11  | 9.49  | 15.26 | 13.82 | 12.43 | 5.76E-21 | 3.46E-14 | 2.88E-13 | 1.73E-06 | 4.80E-02 | 8.08E-06 | 6.78E-02 |
| 538.31577 | 206.84 | 25.06 | 24.90 | 24.97 | 24.83 | 9.45E-02 | 3.03E-01 | 7.76E-01 | 7.40E-02 | 8.62E-01 | 8.92E-01 | 4.49E-01 |
| 538.35031 | 270.15 | 19.79 | 19.49 | 19.55 | 19.08 | 1.97E-02 | 4.92E-01 | 6.77E-01 | 8.65E-03 | 9.91E-01 | 2.92E-01 | 1.65E-01 |
| 538.49303 | 268.74 | 21.67 | 21.65 | 21.66 | 21.63 | 9.85E-01 | 9.96E-01 | 1.00E+00 | 9.83E-01 | 9.99E-01 | 9.99E-01 | 9.92E-01 |
| 538.75837 | 48.38  | 17.83 | 15.81 | 17.94 | 18.32 | 1.14E-30 | 3.24E-14 | 9.33E-01 | 5.05E-02 | 2.18E-14 | 5.11E-15 | 2.02E-01 |
| 538.78046 | 64.65  | 13.37 | 8.05  | 8.60  | 9.73  | 1.63E-39 | 5.11E-15 | 5.11E-15 | 4.13E-14 | 3.99E-01 | 4.08E-05 | 1.11E-02 |
| 538.80143 | 63.8   | 16.62 | 12.54 | 15.47 | 15.50 | 2.47E-37 | 5.11E-15 | 5.73E-05 | 1.75E-04 | 2.15E-14 | 2.84E-14 | 1.00E+00 |
| 538.82244 | 40.42  | 21.60 | 23.19 | 23.07 | 22.99 | 6.57E-37 | 5.11E-15 | 5.11E-15 | 7.77E-15 | 6.96E-01 | 2.99E-01 | 8.95E-01 |

|           |        |       |       |       |       |           |          |          |          |          |          |          |
|-----------|--------|-------|-------|-------|-------|-----------|----------|----------|----------|----------|----------|----------|
| 538.86259 | 43.9   | 15.65 | 13.03 | 13.66 | 15.39 | 1.73E-16  | 1.63E-13 | 9.46E-09 | 8.57E-01 | 2.23E-01 | 1.81E-10 | 2.84E-06 |
| 538.8807  | 44.34  | 16.18 | 17.84 | 17.84 | 18.04 | 5.74E-27  | 4.12E-14 | 4.04E-14 | 2.38E-14 | 1.00E+00 | 6.38E-01 | 6.45E-01 |
| 538.967   | 70.73  | 10.90 | 13.82 | 9.42  | 10.15 | 3.10E-29  | 4.33E-14 | 6.27E-05 | 1.26E-01 | 5.11E-15 | 3.70E-14 | 1.54E-01 |
| 538.98475 | 55.51  | 11.82 | 18.06 | 9.84  | 10.49 | 2.61E-128 | 5.11E-15 | 5.33E-15 | 2.42E-13 | 5.11E-15 | 5.11E-15 | 6.28E-04 |
| 539.06748 | 18.13  | 10.27 | 14.67 | 16.47 | 14.75 | 4.59E-27  | 4.46E-14 | 5.33E-15 | 4.44E-14 | 2.57E-03 | 9.98E-01 | 6.06E-03 |
| 539.13975 | 20.14  | 12.77 | 17.07 | 16.80 | 14.72 | 9.50E-21  | 4.24E-14 | 4.20E-14 | 1.57E-04 | 9.33E-01 | 6.43E-06 | 7.10E-05 |
| 539.31914 | 204.39 | 23.21 | 22.95 | 22.98 | 22.88 | 5.41E-03  | 3.79E-02 | 7.35E-02 | 4.75E-03 | 9.93E-01 | 8.84E-01 | 7.45E-01 |
| 539.34674 | 279.02 | 16.75 | 16.60 | 16.83 | 16.80 | 4.43E-01  | 7.23E-01 | 9.54E-01 | 9.88E-01 | 4.21E-01 | 5.61E-01 | 9.98E-01 |
| 539.49973 | 277.88 | 19.00 | 19.03 | 19.07 | 19.15 | 8.35E-01  | 9.99E-01 | 9.70E-01 | 8.14E-01 | 9.92E-01 | 8.94E-01 | 9.71E-01 |
| 539.82586 | 47.05  | 17.78 | 19.37 | 19.31 | 19.16 | 6.32E-50  | 5.11E-15 | 5.11E-15 | 5.11E-15 | 9.07E-01 | 1.29E-01 | 4.08E-01 |
| 540.07078 | 20.82  | 9.82  | 11.61 | 12.08 | 11.29 | 1.53E-06  | 2.08E-04 | 1.04E-06 | 4.84E-03 | 6.86E-01 | 8.89E-01 | 2.74E-01 |
| 540.27293 | 166.58 | 15.70 | 16.28 | 16.70 | 16.30 | 1.45E-04  | 3.96E-02 | 3.67E-05 | 4.17E-02 | 2.43E-01 | 1.00E+00 | 2.86E-01 |
| 540.33145 | 236.08 | 27.42 | 23.61 | 22.80 | 23.46 | 7.69E-65  | 5.11E-15 | 5.11E-15 | 5.11E-15 | 6.83E-04 | 8.98E-01 | 1.10E-02 |
| 540.3674  | 204.14 | 14.44 | 16.64 | 17.41 | 15.47 | 2.43E-33  | 4.00E-14 | 5.11E-15 | 1.95E-05 | 2.37E-03 | 2.15E-06 | 4.69E-14 |
| 540.50846 | 296.58 | 12.59 | 13.11 | 12.88 | 15.15 | 5.63E-08  | 5.98E-01 | 9.00E-01 | 7.90E-08 | 9.47E-01 | 4.92E-05 | 3.63E-06 |
| 540.73843 | 83.95  | 14.23 | 13.55 | 13.61 | 13.81 | 3.13E-02  | 3.42E-02 | 6.54E-02 | 3.61E-01 | 9.93E-01 | 7.51E-01 | 8.78E-01 |
| 540.75931 | 64.49  | 19.31 | 19.38 | 19.94 | 19.85 | 2.83E-16  | 8.08E-01 | 6.94E-13 | 3.40E-09 | 5.09E-10 | 7.53E-07 | 6.61E-01 |
| 540.79737 | 148.16 | 14.27 | 10.32 | 9.55  | 11.70 | 1.22E-14  | 2.49E-10 | 8.09E-14 | 9.23E-05 | 5.43E-01 | 1.04E-01 | 2.14E-03 |
| 540.82073 | 39.37  | 19.31 | 20.80 | 20.76 | 20.60 | 1.41E-39  | 5.11E-15 | 5.11E-15 | 6.00E-15 | 9.68E-01 | 2.35E-01 | 4.65E-01 |
| 540.83776 | 46.16  | 18.57 | 20.46 | 20.39 | 20.25 | 1.30E-49  | 5.11E-15 | 5.11E-15 | 5.11E-15 | 9.24E-01 | 2.49E-01 | 5.85E-01 |
| 540.87463 | 43.31  | 15.65 | 16.81 | 17.04 | 17.21 | 1.08E-21  | 4.01E-12 | 4.26E-14 | 4.29E-14 | 4.20E-01 | 5.71E-02 | 7.13E-01 |
| 540.93607 | 29.11  | 13.89 | 12.99 | 12.98 | 13.56 | 1.93E-01  | 2.74E-01 | 2.55E-01 | 9.21E-01 | 1.00E+00 | 6.93E-01 | 6.73E-01 |
| 541.22682 | 54.55  | 7.89  | 21.83 | 7.32  | 7.49  | 1.84E-152 | 5.11E-15 | 6.44E-02 | 3.23E-01 | 5.11E-15 | 5.11E-15 | 9.03E-01 |
| 541.23187 | 171.19 | 14.99 | 12.64 | 14.10 | 14.29 | 8.64E-12  | 1.25E-12 | 1.66E-02 | 1.12E-01 | 1.90E-05 | 2.32E-06 | 9.28E-01 |
| 541.27752 | 166.38 | 12.15 | 12.57 | 13.41 | 12.79 | 6.79E-03  | 6.37E-01 | 2.81E-03 | 3.03E-01 | 1.09E-01 | 9.40E-01 | 3.62E-01 |
| 541.32268 | 201.47 | 14.98 | 14.69 | 13.59 | 14.95 | 2.17E-04  | 8.35E-01 | 4.03E-04 | 1.00E+00 | 1.12E-02 | 8.86E-01 | 1.19E-03 |
| 541.33492 | 240.7  | 25.39 | 21.02 | 20.33 | 21.33 | 1.74E-63  | 5.11E-15 | 5.11E-15 | 5.11E-15 | 1.68E-02 | 5.42E-01 | 1.82E-04 |
| 541.36922 | 264.98 | 11.00 | 14.09 | 14.70 | 13.04 | 2.75E-10  | 2.68E-07 | 4.33E-10 | 1.92E-03 | 6.92E-01 | 2.60E-01 | 2.01E-02 |
| 541.76285 | 69.61  | 14.54 | 10.61 | 14.73 | 13.94 | 3.07E-65  | 5.11E-15 | 7.00E-01 | 6.27E-03 | 5.11E-15 | 5.11E-15 | 1.78E-04 |
| 541.82376 | 47.53  | 14.59 | 16.40 | 16.14 | 16.16 | 1.04E-31  | 5.11E-15 | 2.18E-14 | 3.00E-14 | 2.64E-01 | 3.36E-01 | 1.00E+00 |
| 541.84011 | 45.2   | 13.62 | 16.45 | 16.07 | 16.11 | 1.73E-34  | 5.11E-15 | 7.99E-15 | 1.04E-14 | 2.95E-01 | 4.31E-01 | 9.97E-01 |
| 542.01113 | 18.06  | 11.20 | 16.71 | 14.52 | 14.31 | 7.31E-31  | 5.11E-15 | 5.01E-14 | 1.18E-12 | 4.94E-07 | 8.97E-08 | 9.54E-01 |
| 542.23001 | 62.67  | 16.12 | 19.64 | 15.37 | 15.57 | 5.12E-135 | 5.11E-15 | 4.17E-14 | 4.19E-10 | 5.11E-15 | 5.11E-15 | 6.81E-02 |
| 542.25095 | 131.37 | 16.74 | 13.08 | 14.05 | 14.75 | 2.90E-33  | 5.11E-15 | 3.29E-14 | 2.98E-12 | 1.13E-03 | 8.97E-09 | 4.01E-02 |
| 542.28948 | 175.23 | 11.30 | 12.86 | 13.95 | 11.86 | 1.78E-10  | 3.65E-04 | 1.76E-10 | 4.86E-01 | 2.79E-02 | 6.55E-02 | 2.24E-06 |
| 542.31098 | 174.01 | 11.35 | 12.51 | 12.50 | 12.15 | 3.01E-05  | 1.26E-04 | 1.22E-04 | 1.94E-02 | 1.00E+00 | 5.86E-01 | 6.00E-01 |
| 542.33752 | 241.52 | 23.05 | 18.31 | 17.41 | 18.10 | 1.42E-64  | 5.11E-15 | 5.11E-15 | 5.11E-15 | 2.93E-03 | 8.64E-01 | 4.29E-02 |
| 542.69722 | 81.15  | 14.30 | 14.98 | 15.36 | 14.83 | 3.39E-05  | 9.71E-03 | 8.68E-06 | 7.99E-02 | 3.20E-01 | 9.12E-01 | 9.33E-02 |
| 542.71828 | 91.03  | 13.47 | 13.77 | 14.31 | 13.76 | 6.25E-03  | 5.91E-01 | 2.51E-03 | 6.20E-01 | 1.19E-01 | 1.00E+00 | 1.30E-01 |
| 542.75785 | 60.21  | 17.40 | 17.00 | 17.79 | 17.70 | 4.00E-15  | 1.01E-04 | 1.97E-04 | 9.44E-03 | 7.33E-14 | 4.24E-11 | 8.04E-01 |
| 542.77533 | 52.37  | 20.37 | 20.27 | 21.11 | 20.82 | 1.14E-23  | 5.70E-01 | 4.42E-14 | 4.20E-07 | 3.71E-14 | 1.36E-09 | 2.55E-03 |
| 542.81713 | 49.82  | 15.83 | 15.63 | 15.24 | 15.08 | 5.61E-08  | 4.27E-01 | 4.35E-05 | 3.13E-07 | 1.74E-02 | 4.22E-04 | 6.39E-01 |
| 542.83419 | 39.54  | 18.04 | 19.86 | 20.00 | 19.90 | 1.18E-50  | 5.11E-15 | 5.11E-15 | 5.11E-15 | 6.13E-01 | 9.86E-01 | 8.31E-01 |
| 542.85078 | 35.37  | 15.20 | 16.72 | 16.94 | 16.90 | 6.15E-21  | 1.29E-13 | 4.24E-14 | 4.40E-14 | 6.23E-01 | 7.99E-01 | 9.94E-01 |
| 542.89263 | 44.07  | 16.57 | 14.82 | 14.67 | 15.52 | 1.53E-04  | 1.03E-03 | 2.58E-04 | 1.21E-01 | 9.90E-01 | 4.67E-01 | 2.91E-01 |

|           |        |       |       |       |       |           |          |          |          |          |          |          |
|-----------|--------|-------|-------|-------|-------|-----------|----------|----------|----------|----------|----------|----------|
| 542.91317 | 39.76  | 13.46 | 13.65 | 13.27 | 13.81 | 3.84E-01  | 9.25E-01 | 9.28E-01 | 6.94E-01 | 6.26E-01 | 9.65E-01 | 3.52E-01 |
| 542.99458 | 17.86  | 11.83 | 15.83 | 15.84 | 15.20 | 2.89E-28  | 1.62E-14 | 1.44E-14 | 4.35E-14 | 1.00E+00 | 3.18E-01 | 3.06E-01 |
| 543.01669 | 28.59  | 18.07 | 17.09 | 17.00 | 16.65 | 2.76E-08  | 1.38E-04 | 2.40E-05 | 3.08E-08 | 9.84E-01 | 2.65E-01 | 4.44E-01 |
| 543.0376  | 46.58  | 13.83 | 16.60 | 12.00 | 12.65 | 2.38E-126 | 5.11E-15 | 5.11E-15 | 5.11E-15 | 5.11E-15 | 5.11E-15 | 1.22E-10 |
| 543.22907 | 164.53 | 9.40  | 10.29 | 9.19  | 8.57  | 1.59E-02  | 2.90E-01 | 9.76E-01 | 3.78E-01 | 1.45E-01 | 7.50E-03 | 6.37E-01 |
| 543.23187 | 62.84  | 7.99  | 15.74 | 7.84  | 8.11  | 7.88E-101 | 5.11E-15 | 9.07E-01 | 9.53E-01 | 5.11E-15 | 5.11E-15 | 6.57E-01 |
| 543.27391 | 161.91 | 14.89 | 12.76 | 14.10 | 12.38 | 2.75E-13  | 3.49E-09 | 7.75E-02 | 1.46E-11 | 4.79E-04 | 7.03E-01 | 6.95E-06 |
| 543.28514 | 288.48 | 16.93 | 16.29 | 16.25 | 16.87 | 1.78E-05  | 1.18E-03 | 3.88E-04 | 9.82E-01 | 9.95E-01 | 8.18E-03 | 3.35E-03 |
| 543.32044 | 183.44 | 11.21 | 13.44 | 14.11 | 11.48 | 2.30E-11  | 6.00E-06 | 1.91E-09 | 9.35E-01 | 4.59E-01 | 2.29E-04 | 2.75E-07 |
| 543.33993 | 202.21 | 19.87 | 16.01 | 16.43 | 15.06 | 1.86E-86  | 5.11E-15 | 5.11E-15 | 5.11E-15 | 3.16E-02 | 5.42E-08 | 4.70E-14 |
| 543.77883 | 61.18  | 15.73 | 14.17 | 16.41 | 16.13 | 3.94E-47  | 5.11E-15 | 2.02E-07 | 7.34E-03 | 5.11E-15 | 5.11E-15 | 1.17E-01 |
| 543.83911 | 44.43  | 10.75 | 13.16 | 13.23 | 13.69 | 1.14E-25  | 4.33E-14 | 4.41E-14 | 2.24E-14 | 9.93E-01 | 2.01E-01 | 3.10E-01 |
| 543.91535 | 31.4   | 11.30 | 11.57 | 13.23 | 11.08 | 3.80E-11  | 8.07E-01 | 5.42E-09 | 8.86E-01 | 1.39E-06 | 4.06E-01 | 6.63E-10 |
| 543.94513 | 102.92 | 12.57 | 13.60 | 14.06 | 14.13 | 4.19E-11  | 7.14E-05 | 2.53E-09 | 1.43E-09 | 2.05E-01 | 1.22E-01 | 9.89E-01 |
| 544.03866 | 28.16  | 11.56 | 14.99 | 15.11 | 13.45 | 8.16E-46  | 5.11E-15 | 5.11E-15 | 5.10E-14 | 9.47E-01 | 3.99E-10 | 1.20E-11 |
| 544.1126  | 21.78  | 8.39  | 12.20 | 13.19 | 10.37 | 7.29E-37  | 7.77E-15 | 5.11E-15 | 4.07E-08 | 1.44E-02 | 8.10E-07 | 6.91E-14 |
| 544.26806 | 160.24 | 21.92 | 21.63 | 21.87 | 21.59 | 3.39E-01  | 5.40E-01 | 9.96E-01 | 4.42E-01 | 6.91E-01 | 9.98E-01 | 5.90E-01 |
| 544.306   | 174.06 | 14.61 | 15.23 | 14.98 | 14.21 | 1.08E-03  | 6.49E-02 | 4.35E-01 | 4.14E-01 | 7.64E-01 | 8.62E-04 | 1.89E-02 |
| 544.34277 | 222.23 | 15.59 | 10.39 | 11.15 | 10.74 | 1.66E-45  | 5.11E-15 | 5.11E-15 | 5.11E-15 | 9.22E-02 | 7.34E-01 | 5.97E-01 |
| 544.69597 | 79.04  | 12.54 | 11.56 | 12.48 | 12.00 | 1.29E-03  | 2.19E-03 | 9.98E-01 | 2.15E-01 | 5.30E-03 | 4.22E-01 | 3.15E-01 |
| 544.71323 | 66.81  | 14.26 | 13.99 | 15.75 | 14.64 | 1.11E-09  | 7.37E-01 | 1.92E-07 | 4.81E-01 | 2.17E-09 | 8.75E-02 | 4.52E-04 |
| 544.75479 | 72.69  | 13.43 | 10.75 | 12.19 | 12.62 | 2.06E-25  | 5.77E-15 | 1.19E-07 | 1.80E-03 | 2.34E-09 | 1.32E-13 | 2.19E-01 |
| 544.77173 | 45.98  | 18.92 | 18.37 | 19.33 | 18.95 | 1.88E-16  | 2.77E-07 | 2.22E-04 | 9.94E-01 | 4.33E-14 | 3.42E-07 | 1.40E-03 |
| 544.82919 | 43.79  | 16.18 | 17.12 | 17.42 | 17.30 | 2.80E-22  | 1.37E-12 | 4.06E-14 | 4.33E-14 | 6.67E-02 | 4.52E-01 | 7.93E-01 |
| 544.85108 | 39.44  | 18.48 | 18.46 | 18.29 | 18.73 | 1.13E-01  | 9.99E-01 | 6.62E-01 | 4.90E-01 | 7.75E-01 | 4.21E-01 | 6.68E-02 |
| 544.87253 | 45.09  | 16.59 | 17.76 | 17.85 | 17.77 | 1.88E-19  | 8.07E-14 | 4.31E-14 | 1.32E-13 | 9.30E-01 | 1.00E+00 | 9.56E-01 |
| 544.96676 | 150.9  | 14.77 | 15.44 | 15.79 | 15.18 | 1.59E-09  | 6.89E-05 | 4.18E-10 | 3.90E-02 | 1.10E-01 | 3.57E-01 | 8.43E-04 |
| 544.99329 | 54.07  | 13.86 | 21.46 | 14.00 | 13.58 | 8.39E-74  | 5.11E-15 | 9.72E-01 | 8.15E-01 | 5.11E-15 | 5.11E-15 | 5.78E-01 |
| 545.22932 | 151.69 | 13.42 | 14.17 | 15.15 | 14.07 | 2.56E-07  | 4.76E-02 | 3.37E-08 | 1.24E-01 | 5.50E-03 | 9.88E-01 | 2.39E-03 |
| 545.27177 | 150.25 | 20.41 | 19.51 | 19.85 | 19.52 | 1.56E-10  | 3.24E-09 | 3.76E-04 | 1.03E-08 | 7.76E-02 | 1.00E+00 | 9.86E-02 |
| 545.28912 | 164.67 | 12.88 | 10.54 | 11.11 | 10.14 | 1.86E-09  | 4.38E-07 | 1.83E-04 | 6.95E-09 | 5.43E-01 | 8.03E-01 | 1.23E-01 |
| 545.30025 | 179.57 | 8.80  | 13.09 | 13.77 | 9.00  | 3.16E-32  | 4.26E-14 | 1.02E-14 | 9.71E-01 | 3.98E-01 | 4.29E-14 | 3.46E-14 |
| 545.31171 | 167.96 | 12.94 | 13.07 | 12.67 | 11.85 | 1.10E-02  | 9.83E-01 | 8.83E-01 | 2.38E-02 | 7.07E-01 | 1.06E-02 | 1.53E-01 |
| 545.8572  | 35.37  | 12.56 | 13.26 | 11.96 | 12.77 | 4.98E-02  | 4.14E-01 | 5.36E-01 | 9.69E-01 | 2.70E-02 | 7.37E-01 | 3.17E-01 |
| 546.00084 | 61.43  | 13.00 | 18.55 | 10.96 | 11.65 | 2.73E-174 | 5.11E-15 | 5.11E-15 | 5.11E-15 | 5.11E-15 | 5.11E-15 | 6.64E-12 |
| 546.2605  | 194.19 | 14.41 | 13.58 | 14.03 | 13.98 | 1.26E-02  | 4.86E-03 | 4.05E-01 | 3.20E-01 | 2.80E-01 | 4.20E-01 | 9.97E-01 |
| 546.2832  | 187.02 | 21.42 | 20.46 | 20.66 | 20.83 | 1.43E-14  | 6.71E-14 | 7.62E-10 | 4.99E-06 | 3.07E-01 | 1.21E-02 | 4.88E-01 |
| 546.32086 | 220.7  | 15.50 | 15.53 | 15.68 | 15.06 | 3.04E-01  | 9.99E-01 | 9.37E-01 | 5.46E-01 | 9.69E-01 | 4.99E-01 | 2.50E-01 |
| 546.7066  | 74.97  | 14.22 | 11.82 | 14.14 | 14.23 | 9.56E-26  | 3.22E-14 | 9.82E-01 | 1.00E+00 | 4.26E-14 | 4.04E-14 | 9.80E-01 |
| 546.76756 | 49.25  | 16.13 | 15.24 | 15.85 | 15.26 | 2.79E-05  | 2.01E-04 | 5.33E-01 | 4.46E-04 | 2.56E-02 | 1.00E+00 | 3.98E-02 |
| 546.78755 | 66.14  | 16.22 | 12.13 | 15.60 | 15.95 | 8.49E-42  | 5.11E-15 | 6.89E-02 | 7.22E-01 | 5.11E-15 | 5.11E-15 | 5.61E-01 |
| 546.80911 | 54.92  | 19.19 | 19.13 | 20.07 | 19.96 | 8.66E-24  | 9.21E-01 | 4.26E-14 | 3.90E-12 | 4.39E-14 | 3.77E-13 | 7.11E-01 |
| 546.82898 | 55.51  | 14.84 | 12.72 | 13.89 | 14.40 | 6.25E-19  | 4.29E-14 | 5.05E-05 | 1.72E-01 | 6.57E-07 | 5.25E-12 | 1.00E-01 |
| 546.84913 | 51.11  | 15.91 | 13.94 | 14.66 | 14.95 | 3.37E-07  | 6.72E-08 | 9.91E-04 | 2.54E-02 | 1.53E-01 | 2.34E-02 | 8.38E-01 |
| 546.86719 | 39.53  | 17.17 | 19.67 | 19.19 | 19.23 | 6.62E-21  | 4.26E-14 | 1.41E-13 | 2.57E-13 | 2.19E-01 | 3.22E-01 | 9.99E-01 |

|           |        |       |       |       |       |           |          |          |          |          |          |          |
|-----------|--------|-------|-------|-------|-------|-----------|----------|----------|----------|----------|----------|----------|
| 546.95663 | 69.81  | 12.94 | 13.64 | 10.92 | 11.61 | 3.53E-67  | 7.57E-09 | 5.11E-15 | 1.15E-14 | 5.11E-15 | 5.11E-15 | 9.31E-08 |
| 546.99438 | 61.15  | 10.55 | 17.92 | 10.32 | 10.60 | 5.10E-94  | 5.11E-15 | 7.40E-01 | 9.98E-01 | 5.11E-15 | 5.11E-15 | 6.60E-01 |
| 547.24522 | 166.53 | 13.86 | 13.86 | 14.50 | 13.57 | 5.79E-03  | 1.00E+00 | 5.90E-02 | 6.94E-01 | 6.89E-02 | 7.18E-01 | 3.57E-03 |
| 547.28681 | 177.09 | 19.37 | 18.21 | 18.59 | 18.65 | 3.92E-15  | 4.42E-14 | 2.71E-08 | 8.66E-07 | 2.62E-02 | 8.97E-03 | 9.69E-01 |
| 547.47434 | 247.98 | 14.27 | 12.89 | 12.55 | 13.94 | 1.20E-05  | 1.92E-03 | 4.66E-05 | 8.32E-01 | 8.17E-01 | 4.53E-02 | 3.10E-03 |
| 547.81218 | 55.7   | 14.93 | 13.82 | 15.38 | 15.36 | 1.92E-20  | 1.24E-10 | 2.13E-02 | 3.83E-02 | 4.37E-14 | 4.20E-14 | 1.00E+00 |
| 547.90693 | 36.38  | 15.45 | 16.67 | 16.81 | 16.09 | 8.99E-11  | 3.95E-08 | 6.12E-10 | 1.20E-02 | 9.06E-01 | 3.57E-02 | 4.43E-03 |
| 547.99928 | 61.63  | 13.60 | 14.68 | 11.73 | 12.41 | 5.70E-89  | 6.00E-15 | 5.11E-15 | 5.11E-15 | 5.11E-15 | 5.11E-15 | 1.94E-11 |
| 548.24243 | 290.39 | 15.92 | 15.47 | 15.39 | 15.51 | 4.24E-01  | 5.75E-01 | 4.16E-01 | 6.53E-01 | 9.95E-01 | 1.00E+00 | 9.89E-01 |
| 548.2946  | 165.14 | 18.16 | 16.65 | 17.12 | 17.18 | 2.16E-23  | 1.31E-14 | 3.34E-13 | 2.34E-11 | 2.88E-03 | 9.48E-04 | 9.74E-01 |
| 548.72432 | 74.72  | 16.05 | 15.38 | 15.33 | 15.46 | 1.21E-07  | 6.20E-06 | 6.97E-07 | 1.37E-04 | 9.79E-01 | 9.44E-01 | 7.79E-01 |
| 548.76753 | 55.24  | 18.98 | 19.28 | 20.35 | 20.11 | 1.78E-20  | 1.46E-01 | 4.35E-14 | 3.13E-12 | 4.09E-11 | 8.09E-07 | 3.91E-01 |
| 548.78746 | 52.95  | 17.77 | 17.55 | 18.79 | 18.54 | 9.59E-37  | 5.90E-02 | 1.04E-14 | 6.07E-14 | 5.11E-15 | 3.55E-14 | 3.08E-02 |
| 548.80677 | 53.11  | 18.05 | 17.69 | 18.53 | 18.44 | 2.29E-20  | 1.73E-04 | 9.95E-08 | 4.01E-05 | 4.29E-14 | 5.91E-14 | 7.33E-01 |
| 548.93193 | 57.14  | 12.34 | 12.30 | 14.73 | 14.38 | 1.98E-16  | 9.99E-01 | 1.09E-11 | 2.25E-08 | 1.83E-11 | 2.79E-08 | 7.18E-01 |
| 548.99246 | 30.91  | 11.88 | 13.86 | 13.29 | 11.46 | 3.10E-14  | 2.57E-09 | 2.61E-05 | 5.26E-01 | 2.59E-01 | 8.29E-12 | 1.42E-07 |
| 549.06424 | 18.32  | 13.50 | 11.90 | 13.53 | 14.56 | 2.16E-04  | 2.47E-02 | 1.00E+00 | 2.52E-01 | 2.43E-02 | 6.45E-05 | 2.98E-01 |
| 549.15201 | 67.44  | 12.67 | 13.85 | 10.60 | 11.27 | 7.42E-73  | 4.37E-14 | 5.11E-15 | 1.95E-14 | 5.11E-15 | 5.11E-15 | 1.89E-06 |
| 549.16904 | 26.94  | 12.25 | 14.85 | 14.53 | 13.02 | 2.73E-09  | 4.32E-08 | 1.53E-06 | 3.12E-01 | 8.83E-01 | 4.50E-04 | 5.35E-03 |
| 549.26656 | 203.48 | 13.52 | 13.98 | 14.62 | 13.99 | 1.04E-02  | 4.72E-01 | 3.90E-03 | 4.93E-01 | 2.23E-01 | 1.00E+00 | 2.44E-01 |
| 549.30291 | 167.67 | 15.64 | 13.31 | 14.03 | 14.39 | 3.58E-29  | 5.11E-15 | 4.37E-14 | 1.76E-10 | 3.74E-04 | 6.11E-08 | 1.80E-01 |
| 549.34394 | 189.06 | 16.25 | 16.71 | 16.10 | 14.31 | 8.56E-10  | 5.30E-01 | 9.72E-01 | 4.02E-07 | 3.00E-01 | 9.23E-10 | 5.04E-06 |
| 549.42938 | 257.81 | 17.51 | 17.40 | 17.78 | 17.59 | 3.06E-02  | 8.06E-01 | 1.45E-01 | 9.33E-01 | 1.82E-02 | 4.82E-01 | 4.77E-01 |
| 549.77077 | 57.51  | 14.24 | 13.73 | 16.04 | 15.76 | 2.19E-16  | 2.79E-01 | 2.86E-09 | 1.63E-06 | 2.94E-13 | 4.11E-10 | 7.67E-01 |
| 549.82431 | 44.74  | 13.41 | 14.99 | 13.39 | 13.75 | 7.10E-06  | 2.65E-05 | 1.00E+00 | 7.59E-01 | 3.21E-05 | 3.11E-03 | 7.41E-01 |
| 549.84866 | 39.3   | 16.15 | 17.19 | 17.26 | 16.41 | 2.04E-05  | 5.92E-04 | 1.79E-04 | 7.78E-01 | 9.94E-01 | 2.63E-02 | 1.17E-02 |
| 549.92839 | 55.19  | 12.42 | 15.63 | 16.76 | 15.83 | 3.50E-37  | 2.18E-14 | 5.11E-15 | 1.22E-14 | 7.53E-04 | 9.05E-01 | 1.12E-02 |
| 550.02763 | 19.44  | 11.90 | 16.15 | 16.28 | 15.50 | 1.52E-27  | 2.64E-14 | 1.53E-14 | 4.42E-14 | 9.88E-01 | 3.70E-01 | 2.11E-01 |
| 550.09702 | 22.27  | 10.91 | 11.59 | 11.75 | 14.79 | 1.19E-12  | 5.02E-01 | 2.99E-01 | 1.31E-12 | 9.87E-01 | 1.03E-08 | 4.42E-08 |
| 550.2566  | 209.05 | 13.95 | 15.43 | 15.38 | 14.00 | 8.95E-05  | 2.34E-03 | 3.35E-03 | 1.00E+00 | 9.99E-01 | 6.38E-03 | 8.85E-03 |
| 550.31591 | 190.39 | 18.67 | 17.19 | 18.04 | 17.56 | 6.00E-16  | 4.37E-14 | 8.77E-04 | 1.95E-09 | 4.95E-06 | 1.51E-01 | 2.72E-02 |
| 550.35009 | 188.64 | 14.64 | 15.52 | 16.00 | 13.99 | 7.17E-09  | 2.69E-02 | 8.80E-05 | 1.80E-01 | 4.17E-01 | 3.43E-05 | 1.78E-08 |
| 550.43341 | 257.62 | 14.52 | 13.91 | 14.90 | 14.73 | 5.10E-03  | 1.29E-01 | 5.27E-01 | 8.86E-01 | 3.52E-03 | 2.93E-02 | 9.41E-01 |
| 550.72161 | 75.62  | 13.78 | 11.55 | 12.40 | 12.49 | 1.67E-09  | 2.51E-10 | 1.25E-04 | 6.53E-04 | 4.98E-02 | 3.15E-02 | 9.94E-01 |
| 550.74264 | 66.93  | 15.80 | 15.47 | 15.23 | 15.32 | 1.39E-02  | 2.85E-01 | 1.09E-02 | 6.13E-02 | 5.74E-01 | 8.76E-01 | 9.60E-01 |
| 550.76632 | 54.24  | 17.76 | 17.79 | 19.04 | 18.77 | 4.00E-24  | 9.92E-01 | 4.11E-14 | 6.37E-12 | 4.26E-14 | 1.06E-10 | 1.94E-01 |
| 550.79143 | 53.79  | 16.00 | 15.23 | 16.83 | 16.60 | 5.99E-42  | 1.63E-13 | 4.46E-14 | 1.75E-08 | 5.11E-15 | 5.11E-15 | 1.17E-01 |
| 550.83258 | 34.8   | 12.57 | 15.23 | 14.69 | 14.99 | 2.99E-18  | 4.34E-14 | 2.92E-11 | 3.18E-13 | 2.73E-01 | 8.71E-01 | 7.54E-01 |
| 550.8785  | 35.91  | 16.24 | 17.93 | 17.98 | 17.96 | 2.40E-30  | 1.95E-14 | 1.02E-14 | 1.98E-14 | 9.87E-01 | 9.95E-01 | 1.00E+00 |
| 550.9008  | 38.51  | 17.31 | 19.57 | 19.56 | 19.57 | 1.18E-22  | 4.49E-14 | 4.33E-14 | 4.32E-14 | 1.00E+00 | 1.00E+00 | 1.00E+00 |
| 551.0057  | 61.01  | 14.25 | 18.25 | 12.60 | 13.14 | 8.14E-143 | 5.11E-15 | 5.11E-15 | 1.04E-14 | 5.11E-15 | 5.11E-15 | 2.09E-07 |
| 551.03817 | 18.01  | 12.15 | 14.18 | 12.43 | 12.48 | 6.64E-15  | 8.77E-14 | 6.45E-01 | 5.37E-01 | 1.32E-10 | 1.61E-09 | 9.97E-01 |
| 551.10006 | 20.54  | 12.89 | 14.10 | 14.10 | 15.82 | 5.08E-09  | 2.06E-02 | 1.96E-02 | 4.28E-10 | 1.00E+00 | 7.13E-04 | 6.03E-04 |
| 551.26121 | 163.81 | 19.76 | 19.15 | 19.43 | 19.16 | 6.11E-07  | 3.16E-06 | 2.96E-02 | 1.09E-05 | 8.77E-02 | 9.99E-01 | 1.34E-01 |
| 551.31987 | 182.75 | 16.56 | 14.54 | 15.08 | 15.15 | 9.48E-21  | 3.71E-14 | 1.22E-12 | 6.57E-11 | 3.44E-02 | 1.49E-02 | 9.81E-01 |

|           |        |       |       |       |       |           |          |          |          |          |          |          |
|-----------|--------|-------|-------|-------|-------|-----------|----------|----------|----------|----------|----------|----------|
| 551.32974 | 258.3  | 14.64 | 14.07 | 13.58 | 14.53 | 3.37E-02  | 4.70E-01 | 3.30E-02 | 9.93E-01 | 6.00E-01 | 6.80E-01 | 9.27E-02 |
| 551.35891 | 199.13 | 15.94 | 17.29 | 16.98 | 15.84 | 1.50E-04  | 2.00E-03 | 2.69E-02 | 9.95E-01 | 8.45E-01 | 1.66E-03 | 2.06E-02 |
| 551.50483 | 277.25 | 16.29 | 14.93 | 15.02 | 16.97 | 1.65E-08  | 8.48E-04 | 1.92E-03 | 2.41E-01 | 9.94E-01 | 6.67E-07 | 1.76E-06 |
| 551.76894 | 57.67  | 13.14 | 10.51 | 12.78 | 12.64 | 7.57E-19  | 4.29E-14 | 5.33E-01 | 2.79E-01 | 1.94E-13 | 1.51E-11 | 9.63E-01 |
| 551.85717 | 38.61  | 15.34 | 15.77 | 16.16 | 14.93 | 8.86E-03  | 6.33E-01 | 9.89E-02 | 6.77E-01 | 7.05E-01 | 1.21E-01 | 6.41E-03 |
| 551.87301 | 36.92  | 12.35 | 14.08 | 13.79 | 14.10 | 3.51E-05  | 1.96E-04 | 2.59E-03 | 2.46E-04 | 8.98E-01 | 1.00E+00 | 8.84E-01 |
| 551.90409 | 38.16  | 12.04 | 13.30 | 12.98 | 13.79 | 1.80E-06  | 4.47E-04 | 1.46E-02 | 8.88E-07 | 7.44E-01 | 4.61E-01 | 6.92E-02 |
| 551.93037 | 58.55  | 13.42 | 10.19 | 12.75 | 13.81 | 8.10E-26  | 3.35E-14 | 1.10E-01 | 5.91E-01 | 1.05E-13 | 1.71E-14 | 4.74E-03 |
| 551.95266 | 62.99  | 15.39 | 11.41 | 15.37 | 15.75 | 8.01E-58  | 5.11E-15 | 1.00E+00 | 3.35E-01 | 5.11E-15 | 5.11E-15 | 3.12E-01 |
| 552.04844 | 25.51  | 10.95 | 15.02 | 14.60 | 13.92 | 2.56E-29  | 5.77E-15 | 2.09E-14 | 4.42E-14 | 5.81E-01 | 8.98E-03 | 2.03E-01 |
| 552.12871 | 19.66  | 14.03 | 12.49 | 11.71 | 11.57 | 1.62E-05  | 2.21E-02 | 9.60E-05 | 6.34E-05 | 4.70E-01 | 3.55E-01 | 9.95E-01 |
| 552.26927 | 188.3  | 19.57 | 20.87 | 20.86 | 20.13 | 1.26E-21  | 4.41E-14 | 4.33E-14 | 4.21E-04 | 1.00E+00 | 3.05E-06 | 3.19E-06 |
| 552.27407 | 292.64 | 16.25 | 13.75 | 13.60 | 14.29 | 1.46E-06  | 2.35E-05 | 5.46E-06 | 2.09E-03 | 9.93E-01 | 7.67E-01 | 6.04E-01 |
| 552.31054 | 205.09 | 17.30 | 17.63 | 17.98 | 17.79 | 3.90E-05  | 9.90E-02 | 1.43E-05 | 5.81E-03 | 7.31E-02 | 7.27E-01 | 5.44E-01 |
| 552.33152 | 216.82 | 22.91 | 22.58 | 22.73 | 22.31 | 1.22E-05  | 2.40E-02 | 3.66E-01 | 3.76E-06 | 6.13E-01 | 1.05E-01 | 3.20E-03 |
| 552.36708 | 203.78 | 17.21 | 19.39 | 19.37 | 18.90 | 3.07E-27  | 1.95E-14 | 1.91E-14 | 5.94E-14 | 1.00E+00 | 7.80E-02 | 9.04E-02 |
| 552.76373 | 54.19  | 15.07 | 12.67 | 15.69 | 14.79 | 2.12E-20  | 7.33E-14 | 1.21E-01 | 7.74E-01 | 4.13E-14 | 1.38E-10 | 1.39E-02 |
| 552.81605 | 140.06 | 13.07 | 7.60  | 6.76  | 8.88  | 3.91E-23  | 4.43E-14 | 2.93E-14 | 1.84E-10 | 4.99E-01 | 1.59E-01 | 3.40E-03 |
| 552.83905 | 39.93  | 19.34 | 19.85 | 19.80 | 19.87 | 1.04E-10  | 1.94E-08 | 3.96E-07 | 8.19E-09 | 9.26E-01 | 9.90E-01 | 7.98E-01 |
| 552.85893 | 46.52  | 19.61 | 22.11 | 22.11 | 21.95 | 3.23E-37  | 5.11E-15 | 5.11E-15 | 5.77E-15 | 1.00E+00 | 8.50E-01 | 8.38E-01 |
| 552.89573 | 16.95  | 13.79 | 15.52 | 15.38 | 14.04 | 1.40E-09  | 2.54E-07 | 2.11E-06 | 8.61E-01 | 9.66E-01 | 3.86E-05 | 2.23E-04 |
| 552.94252 | 66.01  | 14.80 | 18.84 | 13.35 | 13.81 | 1.88E-138 | 5.11E-15 | 5.11E-15 | 4.05E-14 | 5.11E-15 | 5.11E-15 | 3.04E-05 |
| 553.04928 | 17.89  | 10.95 | 14.71 | 13.36 | 13.09 | 1.50E-15  | 4.13E-14 | 6.46E-08 | 4.40E-06 | 7.58E-03 | 1.27E-03 | 9.23E-01 |
| 553.26118 | 167.81 | 16.48 | 15.37 | 15.71 | 15.50 | 2.38E-13  | 1.99E-12 | 8.45E-07 | 1.04E-09 | 9.68E-02 | 8.37E-01 | 4.89E-01 |
| 553.27737 | 200.67 | 17.21 | 18.87 | 18.97 | 18.10 | 5.14E-26  | 3.89E-14 | 1.89E-14 | 4.73E-07 | 9.28E-01 | 3.44E-05 | 1.82E-06 |
| 553.31375 | 205.49 | 15.38 | 15.42 | 15.79 | 15.59 | 1.73E-01  | 9.97E-01 | 1.70E-01 | 7.18E-01 | 2.81E-01 | 8.43E-01 | 7.96E-01 |
| 553.33491 | 203.43 | 21.05 | 20.63 | 20.77 | 20.41 | 1.92E-06  | 1.70E-03 | 5.90E-02 | 5.81E-07 | 6.59E-01 | 2.39E-01 | 1.49E-02 |
| 553.37091 | 199.33 | 13.61 | 17.12 | 16.94 | 16.66 | 3.49E-17  | 6.46E-14 | 2.52E-13 | 7.00E-11 | 9.73E-01 | 7.10E-01 | 9.13E-01 |
| 553.84509 | 43.14  | 15.56 | 15.14 | 14.60 | 15.35 | 9.01E-06  | 1.24E-01 | 3.68E-06 | 7.08E-01 | 2.66E-02 | 7.19E-01 | 1.01E-03 |
| 553.8622  | 46.43  | 15.33 | 18.36 | 18.36 | 18.26 | 4.50E-35  | 5.11E-15 | 5.11E-15 | 7.11E-15 | 1.00E+00 | 9.76E-01 | 9.72E-01 |
| 553.87367 | 34.12  | 12.36 | 13.54 | 13.55 | 13.79 | 1.51E-06  | 1.66E-04 | 1.31E-04 | 5.69E-06 | 1.00E+00 | 8.29E-01 | 8.34E-01 |
| 553.94029 | 33.19  | 16.36 | 18.15 | 18.45 | 17.38 | 1.03E-17  | 9.52E-13 | 4.41E-14 | 1.11E-04 | 5.86E-01 | 8.12E-03 | 7.18E-05 |
| 553.96501 | 26.26  | 9.40  | 13.11 | 13.88 | 12.53 | 1.80E-34  | 9.77E-15 | 5.11E-15 | 4.11E-14 | 7.62E-02 | 3.02E-01 | 3.08E-04 |
| 554.12468 | 18.06  | 15.10 | 18.25 | 18.63 | 19.14 | 1.60E-30  | 4.30E-14 | 1.80E-14 | 5.33E-15 | 6.46E-01 | 3.82E-02 | 3.97E-01 |
| 554.28536 | 199.9  | 16.92 | 19.48 | 19.46 | 18.03 | 1.24E-33  | 5.11E-15 | 5.11E-15 | 9.09E-07 | 1.00E+00 | 2.77E-10 | 3.50E-10 |
| 554.30457 | 217.41 | 20.12 | 20.67 | 20.04 | 20.62 | 1.01E-05  | 1.47E-03 | 9.44E-01 | 6.37E-03 | 2.44E-04 | 9.89E-01 | 1.26E-03 |
| 554.32868 | 216.16 | 14.02 | 15.17 | 15.06 | 14.51 | 1.54E-03  | 2.60E-03 | 7.21E-03 | 4.50E-01 | 9.88E-01 | 2.20E-01 | 3.66E-01 |
| 554.34697 | 246.37 | 26.44 | 22.29 | 21.79 | 22.34 | 9.28E-61  | 5.11E-15 | 5.11E-15 | 5.11E-15 | 1.24E-01 | 9.96E-01 | 8.30E-02 |
| 554.35804 | 58.13  | 18.95 | 21.40 | 18.52 | 18.57 | 2.01E-119 | 5.11E-15 | 6.33E-10 | 1.55E-07 | 5.11E-15 | 5.11E-15 | 8.72E-01 |
| 554.38312 | 194.4  | 12.62 | 13.86 | 15.25 | 14.68 | 6.99E-12  | 2.68E-03 | 6.34E-12 | 1.92E-07 | 8.23E-04 | 1.22E-01 | 4.16E-01 |
| 554.73238 | 59.41  | 16.01 | 12.48 | 16.03 | 16.49 | 3.05E-53  | 5.11E-15 | 1.00E+00 | 9.78E-02 | 5.11E-15 | 5.11E-15 | 1.32E-01 |
| 554.77475 | 62.23  | 16.52 | 15.81 | 16.41 | 16.52 | 1.08E-11  | 3.12E-10 | 7.22E-01 | 1.00E+00 | 1.73E-07 | 1.62E-09 | 7.13E-01 |
| 554.7963  | 51.02  | 21.97 | 23.02 | 23.23 | 23.06 | 6.74E-44  | 5.11E-15 | 5.11E-15 | 5.11E-15 | 4.54E-02 | 9.74E-01 | 1.46E-01 |
| 554.83663 | 45.14  | 16.59 | 17.03 | 16.88 | 17.09 | 2.73E-06  | 4.70E-05 | 1.40E-02 | 7.58E-06 | 4.21E-01 | 9.57E-01 | 1.88E-01 |
| 554.85574 | 46.37  | 17.36 | 19.35 | 19.40 | 19.34 | 2.15E-38  | 5.11E-15 | 5.11E-15 | 5.11E-15 | 9.81E-01 | 1.00E+00 | 9.71E-01 |

|           |        |       |       |       |       |           |          |          |          |          |          |          |
|-----------|--------|-------|-------|-------|-------|-----------|----------|----------|----------|----------|----------|----------|
| 554.9414  | 68.3   | 13.21 | 13.75 | 11.06 | 11.80 | 2.06E-50  | 1.06E-03 | 5.11E-15 | 4.35E-14 | 5.11E-15 | 5.11E-15 | 1.07E-05 |
| 554.95878 | 62.77  | 13.35 | 18.71 | 11.14 | 11.91 | 5.20E-122 | 5.11E-15 | 5.11E-15 | 4.24E-14 | 5.11E-15 | 5.11E-15 | 2.41E-05 |
| 554.99354 | 17.61  | 12.48 | 15.50 | 16.08 | 14.23 | 3.23E-14  | 5.80E-10 | 1.68E-13 | 9.45E-04 | 5.69E-01 | 3.54E-02 | 4.96E-04 |
| 555.06311 | 17.66  | 13.17 | 13.31 | 13.93 | 13.44 | 6.21E-01  | 9.96E-01 | 5.80E-01 | 9.72E-01 | 7.41E-01 | 9.97E-01 | 8.65E-01 |
| 555.10822 | 17.17  | 11.55 | 17.67 | 16.45 | 16.25 | 2.24E-25  | 1.27E-14 | 4.40E-14 | 4.85E-14 | 1.13E-01 | 5.60E-02 | 9.83E-01 |
| 555.12771 | 18.09  | 15.07 | 18.38 | 18.77 | 18.89 | 7.59E-28  | 4.25E-14 | 2.24E-14 | 2.26E-14 | 6.63E-01 | 4.59E-01 | 9.84E-01 |
| 555.27281 | 163.85 | 23.77 | 23.42 | 24.07 | 23.85 | 8.01E-05  | 4.93E-02 | 1.07E-01 | 9.17E-01 | 2.14E-05 | 1.21E-02 | 4.25E-01 |
| 555.30164 | 212.63 | 18.12 | 19.12 | 18.92 | 18.68 | 8.15E-08  | 7.51E-08 | 1.76E-05 | 7.21E-03 | 6.65E-01 | 7.20E-02 | 5.31E-01 |
| 555.35039 | 249.99 | 24.62 | 20.13 | 19.44 | 20.42 | 2.49E-64  | 5.11E-15 | 5.11E-15 | 5.11E-15 | 1.84E-02 | 6.10E-01 | 3.17E-04 |
| 555.35887 | 58.22  | 17.62 | 20.42 | 17.16 | 17.23 | 1.83E-132 | 5.11E-15 | 2.05E-11 | 2.86E-08 | 5.11E-15 | 5.11E-15 | 7.51E-01 |
| 555.44234 | 218.93 | 16.16 | 12.01 | 12.31 | 14.06 | 1.18E-22  | 4.07E-14 | 4.20E-14 | 4.44E-06 | 8.81E-01 | 1.25E-05 | 2.32E-04 |
| 555.79953 | 51.16  | 18.13 | 19.15 | 19.45 | 19.25 | 2.05E-44  | 5.11E-15 | 5.11E-15 | 5.11E-15 | 1.25E-03 | 6.41E-01 | 6.66E-02 |
| 555.85614 | 41.27  | 10.26 | 12.63 | 13.16 | 13.76 | 1.71E-16  | 2.65E-08 | 6.30E-12 | 4.57E-14 | 5.29E-01 | 3.05E-02 | 4.54E-01 |
| 555.95581 | 52.11  | 11.17 | 13.63 | 12.52 | 11.75 | 1.85E-18  | 4.24E-14 | 7.17E-07 | 1.08E-01 | 9.77E-05 | 6.05E-11 | 1.81E-02 |
| 556.11129 | 17.74  | 13.91 | 18.91 | 17.68 | 16.13 | 9.63E-17  | 4.23E-14 | 1.50E-10 | 4.85E-04 | 1.20E-01 | 1.33E-05 | 3.43E-02 |
| 556.27686 | 155.68 | 22.02 | 21.67 | 22.35 | 22.13 | 6.20E-05  | 6.44E-02 | 7.36E-02 | 8.55E-01 | 1.71E-05 | 1.04E-02 | 4.26E-01 |
| 556.30257 | 213.14 | 18.35 | 19.48 | 19.17 | 18.83 | 7.51E-13  | 5.44E-13 | 1.18E-07 | 6.17E-03 | 1.39E-01 | 1.22E-04 | 1.05E-01 |
| 556.32337 | 207.27 | 19.95 | 19.78 | 19.56 | 19.12 | 2.30E-06  | 6.90E-01 | 4.51E-02 | 1.10E-06 | 4.55E-01 | 2.28E-04 | 2.86E-02 |
| 556.35314 | 237.62 | 22.20 | 16.53 | 16.39 | 17.06 | 8.36E-65  | 5.11E-15 | 5.11E-15 | 5.11E-15 | 9.62E-01 | 2.33E-01 | 8.27E-02 |
| 556.3642  | 67.1   | 10.63 | 16.34 | 9.39  | 9.82  | 1.45E-160 | 5.11E-15 | 5.11E-15 | 1.13E-13 | 5.11E-15 | 5.11E-15 | 1.18E-04 |
| 556.73355 | 66.5   | 18.69 | 19.06 | 19.87 | 19.49 | 8.62E-26  | 1.60E-03 | 7.11E-15 | 7.65E-13 | 2.27E-13 | 2.24E-04 | 1.55E-03 |
| 556.75379 | 72.31  | 14.85 | 12.59 | 14.97 | 14.81 | 4.77E-32  | 6.22E-15 | 9.17E-01 | 9.97E-01 | 5.33E-15 | 1.62E-14 | 8.48E-01 |
| 556.7725  | 72.21  | 14.97 | 13.37 | 14.82 | 15.03 | 4.95E-27  | 2.11E-14 | 7.18E-01 | 9.77E-01 | 4.51E-14 | 2.71E-14 | 5.02E-01 |
| 556.81172 | 43.79  | 18.28 | 19.77 | 19.98 | 19.77 | 3.74E-50  | 5.11E-15 | 5.11E-15 | 5.11E-15 | 1.21E-01 | 1.00E+00 | 1.47E-01 |
| 556.85076 | 43.81  | 16.46 | 16.75 | 17.00 | 17.22 | 1.42E-09  | 4.39E-02 | 1.18E-05 | 1.09E-09 | 1.39E-01 | 4.88E-04 | 2.16E-01 |
| 556.90789 | 33.99  | 14.37 | 13.39 | 13.93 | 14.72 | 3.77E-02  | 1.36E-01 | 7.56E-01 | 8.82E-01 | 6.51E-01 | 3.07E-02 | 3.48E-01 |
| 556.95747 | 66.29  | 13.58 | 13.89 | 11.69 | 12.37 | 2.97E-79  | 8.84E-04 | 5.11E-15 | 5.11E-15 | 5.11E-15 | 5.11E-15 | 1.38E-13 |
| 557.11084 | 21.42  | 12.72 | 16.42 | 15.51 | 15.19 | 5.99E-10  | 4.33E-10 | 2.61E-06 | 7.74E-05 | 3.48E-01 | 1.38E-01 | 9.44E-01 |
| 557.20153 | 63.62  | 8.90  | 22.93 | 8.19  | 8.40  | 1.35E-151 | 5.11E-15 | 1.48E-02 | 1.64E-01 | 5.11E-15 | 5.11E-15 | 8.42E-01 |
| 557.28465 | 158.73 | 22.04 | 21.64 | 22.01 | 21.48 | 2.45E-04  | 3.17E-02 | 9.96E-01 | 1.09E-03 | 6.58E-02 | 7.04E-01 | 3.08E-03 |
| 557.30612 | 208.78 | 15.88 | 17.21 | 16.84 | 16.50 | 2.16E-08  | 9.07E-09 | 4.83E-05 | 2.49E-02 | 3.01E-01 | 8.12E-03 | 4.18E-01 |
| 557.32791 | 207.47 | 18.73 | 17.64 | 17.50 | 17.02 | 3.88E-20  | 6.07E-10 | 2.54E-12 | 4.11E-14 | 8.39E-01 | 1.85E-03 | 2.33E-02 |
| 557.35584 | 227.07 | 18.90 | 8.91  | 7.71  | 9.73  | 2.77E-55  | 5.11E-15 | 5.11E-15 | 5.11E-15 | 1.66E-01 | 5.24E-01 | 4.50E-03 |
| 557.45714 | 242.78 | 16.00 | 15.34 | 15.50 | 15.97 | 4.32E-05  | 3.22E-04 | 9.78E-03 | 9.98E-01 | 7.69E-01 | 1.48E-03 | 2.81E-02 |
| 557.73667 | 69.17  | 13.19 | 8.92  | 14.47 | 12.91 | 7.95E-44  | 5.11E-15 | 2.38E-04 | 8.21E-01 | 5.11E-15 | 6.00E-15 | 1.60E-05 |
| 557.79765 | 51.76  | 15.75 | 16.66 | 16.78 | 16.72 | 6.91E-30  | 3.72E-14 | 6.66E-15 | 2.66E-14 | 4.76E-01 | 8.89E-01 | 9.06E-01 |
| 557.81306 | 47.25  | 12.71 | 16.13 | 15.54 | 15.45 | 2.45E-26  | 1.07E-14 | 4.37E-14 | 4.30E-14 | 1.95E-01 | 1.24E-01 | 9.92E-01 |
| 557.89216 | 46.29  | 12.14 | 13.67 | 12.83 | 13.49 | 2.67E-02  | 2.84E-02 | 5.76E-01 | 7.86E-02 | 4.41E-01 | 9.90E-01 | 6.60E-01 |
| 558.20393 | 55.11  | 11.40 | 21.58 | 9.73  | 10.19 | 1.32E-153 | 5.11E-15 | 4.15E-14 | 1.36E-09 | 5.11E-15 | 5.11E-15 | 6.92E-02 |
| 558.224   | 120.47 | 13.67 | 11.76 | 15.16 | 14.33 | 1.02E-11  | 9.58E-05 | 3.75E-03 | 4.53E-01 | 3.39E-12 | 3.52E-07 | 2.68E-01 |
| 558.28738 | 170.38 | 20.18 | 19.66 | 20.04 | 19.51 | 2.20E-05  | 2.47E-03 | 7.73E-01 | 8.13E-05 | 5.29E-02 | 7.82E-01 | 3.67E-03 |
| 558.31508 | 225.68 | 16.29 | 9.06  | 8.56  | 10.94 | 1.52E-27  | 2.71E-14 | 8.88E-15 | 7.20E-13 | 8.81E-01 | 3.53E-02 | 3.54E-03 |
| 558.33396 | 245.23 | 14.49 | 20.10 | 19.55 | 19.01 | 3.20E-37  | 5.11E-15 | 5.11E-15 | 1.73E-14 | 5.00E-01 | 4.12E-02 | 5.52E-01 |
| 558.73172 | 59.42  | 17.04 | 16.99 | 18.18 | 17.71 | 9.82E-22  | 9.77E-01 | 4.32E-14 | 9.10E-07 | 4.24E-14 | 2.78E-07 | 1.36E-03 |
| 558.74919 | 52.74  | 19.64 | 19.73 | 20.62 | 20.30 | 5.15E-27  | 7.05E-01 | 1.47E-14 | 1.21E-11 | 4.26E-14 | 1.36E-08 | 2.32E-03 |

|           |        |       |       |       |       |          |          |          |          |          |          |          |
|-----------|--------|-------|-------|-------|-------|----------|----------|----------|----------|----------|----------|----------|
| 558.79172 | 46.86  | 16.16 | 16.57 | 16.88 | 16.79 | 4.49E-13 | 1.03E-04 | 1.86E-12 | 1.95E-09 | 7.54E-03 | 1.14E-01 | 8.09E-01 |
| 558.80812 | 48.43  | 18.24 | 19.21 | 19.58 | 19.49 | 1.70E-37 | 3.75E-14 | 5.11E-15 | 5.11E-15 | 6.46E-04 | 2.27E-02 | 7.86E-01 |
| 558.82474 | 38.09  | 16.27 | 17.75 | 17.93 | 17.90 | 1.07E-30 | 3.33E-14 | 6.66E-15 | 1.42E-14 | 5.92E-01 | 7.39E-01 | 9.97E-01 |
| 558.84218 | 36.64  | 14.05 | 12.93 | 13.70 | 13.53 | 1.13E-03 | 3.83E-04 | 5.62E-01 | 2.49E-01 | 3.52E-02 | 1.74E-01 | 9.35E-01 |
| 558.86633 | 46.48  | 16.29 | 14.39 | 14.48 | 15.16 | 3.06E-06 | 1.20E-05 | 2.72E-05 | 2.56E-02 | 9.96E-01 | 2.45E-01 | 3.43E-01 |
| 558.88776 | 39.08  | 16.40 | 18.62 | 18.20 | 18.43 | 3.00E-16 | 7.03E-14 | 3.16E-10 | 8.60E-12 | 3.98E-01 | 8.99E-01 | 8.40E-01 |
| 558.99061 | 28.28  | 16.62 | 12.21 | 11.89 | 12.80 | 5.35E-26 | 4.13E-14 | 2.02E-14 | 4.71E-14 | 8.73E-01 | 5.49E-01 | 1.65E-01 |
| 559.01476 | 61.87  | 10.62 | 16.40 | 10.23 | 10.07 | 2.63E-77 | 5.11E-15 | 3.53E-01 | 1.14E-01 | 5.11E-15 | 5.11E-15 | 9.18E-01 |
| 559.06894 | 17.33  | 17.31 | 21.50 | 21.23 | 19.49 | 6.67E-34 | 5.11E-15 | 5.33E-15 | 4.18E-10 | 8.28E-01 | 2.20E-08 | 1.22E-06 |
| 559.20005 | 62.83  | 9.39  | 18.17 | 9.53  | 8.99  | 3.76E-91 | 5.11E-15 | 9.63E-01 | 5.28E-01 | 5.11E-15 | 5.11E-15 | 2.82E-01 |
| 559.20801 | 55.84  | 12.34 | 14.36 | 11.33 | 11.31 | 1.02E-25 | 5.02E-12 | 9.17E-04 | 1.05E-03 | 2.26E-14 | 3.02E-14 | 1.00E+00 |
| 559.28498 | 165.32 | 12.59 | 9.40  | 11.32 | 11.23 | 3.72E-16 | 4.35E-14 | 9.45E-04 | 5.81E-04 | 3.07E-07 | 2.65E-06 | 9.94E-01 |
| 559.29548 | 169.75 | 16.96 | 16.49 | 16.71 | 16.11 | 2.19E-04 | 5.75E-02 | 5.30E-01 | 8.95E-05 | 6.47E-01 | 2.31E-01 | 1.33E-02 |
| 559.30079 | 166.19 | 19.98 | 19.24 | 19.63 | 18.91 | 5.74E-07 | 6.30E-04 | 2.34E-01 | 4.53E-07 | 1.83E-01 | 3.38E-01 | 1.75E-03 |
| 559.33733 | 223.31 | 15.27 | 16.91 | 15.62 | 18.06 | 1.43E-17 | 7.36E-07 | 6.49E-01 | 4.25E-14 | 2.03E-04 | 1.89E-03 | 1.55E-12 |
| 559.47312 | 244.05 | 22.00 | 21.57 | 21.73 | 21.67 | 6.05E-04 | 3.43E-04 | 5.35E-02 | 1.43E-02 | 4.24E-01 | 7.88E-01 | 9.47E-01 |
| 559.7527  | 62.04  | 14.73 | 13.36 | 15.93 | 15.51 | 2.29E-34 | 8.48E-13 | 1.58E-10 | 9.81E-05 | 5.11E-15 | 1.02E-14 | 9.32E-02 |
| 559.81404 | 45.08  | 13.29 | 13.02 | 12.85 | 13.49 | 5.90E-03 | 4.70E-01 | 8.08E-02 | 6.99E-01 | 8.02E-01 | 7.46E-02 | 5.53E-03 |
| 559.89137 | 32.4   | 12.56 | 13.83 | 13.90 | 13.62 | 1.69E-04 | 1.08E-03 | 3.96E-04 | 1.18E-02 | 9.96E-01 | 9.36E-01 | 8.51E-01 |
| 560.07433 | 18.41  | 15.99 | 19.13 | 18.98 | 17.71 | 1.17E-35 | 5.11E-15 | 5.11E-15 | 1.28E-11 | 9.23E-01 | 6.24E-08 | 1.09E-06 |
| 560.14162 | 19.32  | 13.52 | 13.60 | 12.63 | 13.11 | 7.06E-02 | 9.98E-01 | 1.11E-01 | 7.44E-01 | 8.43E-02 | 6.51E-01 | 6.60E-01 |
| 560.20324 | 63.69  | 13.04 | 14.39 | 11.04 | 11.72 | 1.69E-85 | 5.11E-15 | 5.11E-15 | 5.77E-15 | 5.11E-15 | 5.11E-15 | 1.36E-08 |
| 560.24024 | 183.94 | 15.49 | 16.00 | 16.48 | 15.91 | 1.40E-03 | 1.70E-01 | 3.93E-04 | 3.40E-01 | 2.20E-01 | 9.88E-01 | 1.25E-01 |
| 560.30307 | 174.3  | 18.59 | 17.49 | 17.93 | 17.28 | 9.11E-20 | 6.83E-14 | 4.82E-06 | 4.24E-14 | 5.11E-03 | 4.11E-01 | 1.47E-05 |
| 560.33097 | 223.39 | 15.61 | 17.26 | 15.73 | 18.21 | 1.65E-16 | 1.11E-06 | 9.80E-01 | 1.16E-13 | 1.10E-05 | 1.82E-02 | 1.95E-12 |
| 560.47748 | 240.5  | 20.57 | 20.03 | 20.21 | 20.14 | 2.09E-05 | 1.43E-05 | 7.47E-03 | 1.54E-03 | 3.81E-01 | 7.54E-01 | 9.44E-01 |
| 560.72896 | 70.11  | 13.10 | 11.00 | 12.42 | 12.79 | 3.42E-19 | 4.35E-14 | 6.63E-03 | 4.78E-01 | 1.54E-09 | 2.83E-13 | 3.29E-01 |
| 560.7459  | 52.21  | 18.56 | 17.82 | 19.26 | 18.93 | 9.08E-35 | 9.28E-13 | 1.02E-11 | 9.44E-04 | 5.11E-15 | 2.20E-14 | 5.60E-03 |
| 560.80452 | 40.8   | 16.29 | 16.29 | 16.60 | 16.32 | 3.84E-02 | 1.00E+00 | 5.51E-02 | 9.95E-01 | 6.99E-02 | 9.96E-01 | 1.33E-01 |
| 560.82495 | 38.11  | 18.15 | 18.71 | 18.23 | 18.60 | 3.65E-04 | 1.33E-03 | 9.52E-01 | 1.80E-02 | 9.90E-03 | 9.08E-01 | 8.00E-02 |
| 560.85083 | 48.38  | 16.57 | 16.67 | 17.15 | 17.15 | 2.94E-06 | 8.55E-01 | 8.83E-05 | 1.85E-04 | 2.98E-03 | 4.80E-03 | 1.00E+00 |
| 560.96661 | 56.53  | 13.40 | 20.69 | 14.28 | 13.74 | 6.00E-65 | 5.11E-15 | 3.03E-02 | 7.36E-01 | 5.11E-15 | 5.11E-15 | 3.67E-01 |
| 561.04885 | 16.78  | 9.07  | 12.33 | 12.04 | 11.84 | 1.20E-16 | 6.48E-14 | 1.71E-12 | 1.76E-10 | 8.75E-01 | 6.16E-01 | 9.60E-01 |
| 561.0714  | 20.57  | 14.81 | 14.59 | 14.71 | 13.61 | 2.02E-03 | 9.09E-01 | 9.91E-01 | 2.21E-03 | 9.83E-01 | 2.32E-02 | 7.24E-03 |
| 561.24338 | 171.39 | 13.24 | 12.18 | 12.72 | 12.62 | 1.38E-02 | 5.74E-03 | 3.52E-01 | 2.32E-01 | 3.53E-01 | 5.63E-01 | 9.91E-01 |
| 561.33286 | 214.08 | 16.50 | 16.81 | 15.76 | 16.61 | 7.04E-07 | 3.40E-01 | 5.09E-04 | 9.45E-01 | 5.73E-07 | 7.23E-01 | 1.34E-04 |
| 561.48522 | 259.43 | 19.61 | 18.93 | 19.09 | 19.72 | 1.68E-04 | 3.70E-03 | 4.17E-02 | 9.51E-01 | 8.53E-01 | 1.11E-03 | 1.40E-02 |
| 561.75182 | 42.39  | 12.76 | 10.48 | 12.15 | 12.35 | 5.09E-10 | 3.69E-10 | 2.50E-01 | 6.17E-01 | 9.19E-06 | 1.40E-06 | 9.43E-01 |
| 561.83133 | 41.32  | 12.39 | 13.28 | 12.44 | 13.46 | 4.67E-02 | 2.18E-01 | 1.00E+00 | 1.12E-01 | 2.78E-01 | 9.84E-01 | 1.50E-01 |
| 561.97992 | 31.16  | 11.94 | 18.33 | 17.00 | 16.20 | 2.77E-64 | 5.11E-15 | 5.11E-15 | 5.11E-15 | 1.17E-05 | 5.98E-12 | 2.32E-02 |
| 562.0533  | 18.87  | 12.14 | 15.64 | 15.53 | 15.44 | 7.86E-22 | 4.40E-14 | 4.42E-14 | 4.69E-14 | 9.92E-01 | 9.57E-01 | 9.95E-01 |
| 562.25617 | 197.26 | 17.52 | 17.95 | 18.23 | 17.72 | 7.09E-03 | 1.72E-01 | 4.20E-03 | 7.94E-01 | 5.62E-01 | 7.19E-01 | 9.42E-02 |
| 562.31561 | 191.28 | 21.04 | 21.19 | 21.22 | 21.01 | 1.85E-01 | 5.36E-01 | 3.88E-01 | 9.92E-01 | 9.96E-01 | 4.10E-01 | 2.86E-01 |
| 562.34268 | 291.46 | 16.93 | 14.37 | 12.52 | 15.38 | 5.67E-34 | 5.08E-14 | 5.11E-15 | 4.24E-06 | 2.05E-08 | 7.42E-03 | 4.35E-14 |
| 562.49195 | 260.65 | 16.59 | 16.18 | 16.35 | 18.20 | 5.91E-08 | 5.95E-01 | 8.83E-01 | 3.01E-05 | 9.56E-01 | 1.92E-07 | 1.82E-06 |



|           |        |       |       |       |       |           |          |          |          |          |          |          |
|-----------|--------|-------|-------|-------|-------|-----------|----------|----------|----------|----------|----------|----------|
| 562.74108 | 60.33  | 16.42 | 13.27 | 16.20 | 16.35 | 1.57E-52  | 5.11E-15 | 5.72E-01 | 9.82E-01 | 5.11E-15 | 5.11E-15 | 8.30E-01 |
| 562.76232 | 67.48  | 15.87 | 12.55 | 14.41 | 14.20 | 1.27E-33  | 5.11E-15 | 5.11E-10 | 8.54E-12 | 8.72E-14 | 6.10E-11 | 7.99E-01 |
| 562.78301 | 55.07  | 17.43 | 16.93 | 18.31 | 18.15 | 6.05E-23  | 6.86E-04 | 4.08E-10 | 9.85E-07 | 3.92E-14 | 4.26E-14 | 6.32E-01 |
| 562.80287 | 16.77  | 15.51 | 17.28 | 17.17 | 18.07 | 1.65E-28  | 4.43E-14 | 4.47E-14 | 5.11E-15 | 9.47E-01 | 7.08E-04 | 7.15E-05 |
| 562.82279 | 53.88  | 15.64 | 13.04 | 14.53 | 14.85 | 1.82E-14  | 4.44E-14 | 1.07E-03 | 4.62E-02 | 7.82E-06 | 1.15E-07 | 7.32E-01 |
| 562.84111 | 37.23  | 18.44 | 20.75 | 20.28 | 20.28 | 7.42E-29  | 5.33E-15 | 4.27E-14 | 4.34E-14 | 6.57E-02 | 8.30E-02 | 1.00E+00 |
| 562.89935 | 40.57  | 12.74 | 13.12 | 14.27 | 14.34 | 4.81E-05  | 7.74E-01 | 6.84E-04 | 6.19E-04 | 2.34E-02 | 1.94E-02 | 9.99E-01 |
| 562.95743 | 145.53 | 11.92 | 12.01 | 13.98 | 15.99 | 3.05E-27  | 9.93E-01 | 2.60E-08 | 1.20E-14 | 2.62E-07 | 2.60E-14 | 3.28E-07 |
| 562.9688  | 61.27  | 13.64 | 18.41 | 11.69 | 12.38 | 1.95E-160 | 5.11E-15 | 5.11E-15 | 5.11E-15 | 5.11E-15 | 5.11E-15 | 2.27E-11 |
| 563.14551 | 65.95  | 12.33 | 12.78 | 10.34 | 10.98 | 1.88E-59  | 8.00E-04 | 5.11E-15 | 1.58E-14 | 5.11E-15 | 5.11E-15 | 1.43E-06 |
| 563.18077 | 20.69  | 11.97 | 13.45 | 12.99 | 12.37 | 2.76E-02  | 2.31E-02 | 1.89E-01 | 8.70E-01 | 8.22E-01 | 2.00E-01 | 6.60E-01 |
| 563.25955 | 181.61 | 14.92 | 14.80 | 15.18 | 14.91 | 5.46E-01  | 9.70E-01 | 7.46E-01 | 1.00E+00 | 4.89E-01 | 9.78E-01 | 7.61E-01 |
| 563.31916 | 192.63 | 19.20 | 19.24 | 19.29 | 19.12 | 5.66E-01  | 9.84E-01 | 8.66E-01 | 9.08E-01 | 9.79E-01 | 7.51E-01 | 5.07E-01 |
| 563.34687 | 233.95 | 16.23 | 9.86  | 8.94  | 10.92 | 1.48E-55  | 5.11E-15 | 5.11E-15 | 5.11E-15 | 6.36E-02 | 2.96E-02 | 2.23E-06 |
| 563.5052  | 269.91 | 24.65 | 23.81 | 23.86 | 24.24 | 9.78E-09  | 9.64E-08 | 4.18E-07 | 3.04E-02 | 9.87E-01 | 2.36E-02 | 5.32E-02 |
| 563.75168 | 55.87  | 11.75 | 9.50  | 12.61 | 12.57 | 7.23E-15  | 6.57E-08 | 1.05E-01 | 1.55E-01 | 3.75E-13 | 3.17E-12 | 1.00E+00 |
| 563.84302 | 41.76  | 14.38 | 16.14 | 15.49 | 15.60 | 6.39E-13  | 2.33E-13 | 3.05E-06 | 7.10E-07 | 1.87E-02 | 8.38E-02 | 9.66E-01 |
| 563.88033 | 37.25  | 16.24 | 16.89 | 17.35 | 16.62 | 2.78E-05  | 2.24E-02 | 8.60E-06 | 3.68E-01 | 1.97E-01 | 6.57E-01 | 1.17E-02 |
| 564.31827 | 197.83 | 15.19 | 12.53 | 11.61 | 12.63 | 6.72E-17  | 4.34E-10 | 4.19E-14 | 4.46E-09 | 9.50E-02 | 9.96E-01 | 6.21E-02 |
| 564.33127 | 213.32 | 25.60 | 26.54 | 26.28 | 26.22 | 1.33E-10  | 6.65E-11 | 2.66E-06 | 3.49E-05 | 2.00E-01 | 1.05E-01 | 9.82E-01 |
| 564.50858 | 264.9  | 23.30 | 22.44 | 22.49 | 22.85 | 1.54E-08  | 1.27E-07 | 4.99E-07 | 1.67E-02 | 9.89E-01 | 4.72E-02 | 9.53E-02 |
| 564.69972 | 76.57  | 15.65 | 16.45 | 16.36 | 15.97 | 3.69E-08  | 2.15E-07 | 3.62E-06 | 1.16E-01 | 9.29E-01 | 7.53E-03 | 4.01E-02 |
| 564.72109 | 92.91  | 12.74 | 12.02 | 12.20 | 12.00 | 2.92E-02  | 4.69E-02 | 2.05E-01 | 4.86E-02 | 9.14E-01 | 1.00E+00 | 9.01E-01 |
| 564.76221 | 57.56  | 17.22 | 16.88 | 18.51 | 18.19 | 1.43E-28  | 5.99E-02 | 4.37E-14 | 2.53E-10 | 9.77E-15 | 4.32E-14 | 1.03E-01 |
| 564.77994 | 50.77  | 17.58 | 14.89 | 16.62 | 17.07 | 1.58E-54  | 5.11E-15 | 5.96E-12 | 6.69E-04 | 5.11E-15 | 5.11E-15 | 5.69E-03 |
| 564.83555 | 38.19  | 16.17 | 17.76 | 17.87 | 17.22 | 4.55E-15  | 5.44E-12 | 1.78E-13 | 1.21E-05 | 9.57E-01 | 7.12E-02 | 1.76E-02 |
| 564.91532 | 45.3   | 15.28 | 15.86 | 15.91 | 16.42 | 3.62E-02  | 4.06E-01 | 3.24E-01 | 1.77E-02 | 9.99E-01 | 4.96E-01 | 5.68E-01 |
| 564.93638 | 26.07  | 13.55 | 15.43 | 16.22 | 15.61 | 1.38E-12  | 8.19E-07 | 1.47E-12 | 1.31E-07 | 1.15E-01 | 9.62E-01 | 3.29E-01 |
| 564.99802 | 26.73  | 17.09 | 14.18 | 14.12 | 15.10 | 7.24E-14  | 1.58E-11 | 4.23E-12 | 9.42E-06 | 9.99E-01 | 1.19E-01 | 8.26E-02 |
| 565.04896 | 16.75  | 22.16 | 24.11 | 23.96 | 23.58 | 5.29E-39  | 5.11E-15 | 5.11E-15 | 3.46E-14 | 6.82E-01 | 9.98E-04 | 3.12E-02 |
| 565.21915 | 116.93 | 10.69 | 12.74 | 14.00 | 12.19 | 3.48E-11  | 2.98E-05 | 4.27E-12 | 5.48E-03 | 2.66E-02 | 6.34E-01 | 5.98E-04 |
| 565.27636 | 170.92 | 16.51 | 14.75 | 14.90 | 14.86 | 1.75E-20  | 4.31E-14 | 5.13E-14 | 5.72E-14 | 8.63E-01 | 9.41E-01 | 9.98E-01 |
| 565.33479 | 217.98 | 23.89 | 24.73 | 24.44 | 24.42 | 3.05E-08  | 7.71E-09 | 2.38E-04 | 6.82E-04 | 1.41E-01 | 1.27E-01 | 9.99E-01 |
| 565.51521 | 278.22 | 20.98 | 19.99 | 20.09 | 20.57 | 4.67E-08  | 2.98E-07 | 3.29E-06 | 1.06E-01 | 9.53E-01 | 1.04E-02 | 4.26E-02 |
| 565.75984 | 59.13  | 11.40 | 9.43  | 12.66 | 12.77 | 5.08E-26  | 2.91E-10 | 7.98E-05 | 2.98E-05 | 2.55E-14 | 2.46E-14 | 9.82E-01 |
| 565.7979  | 43.28  | 13.03 | 13.60 | 12.75 | 13.33 | 4.35E-05  | 7.99E-03 | 3.93E-01 | 3.38E-01 | 2.85E-05 | 4.88E-01 | 1.02E-02 |
| 565.82326 | 43.04  | 15.64 | 14.78 | 14.54 | 14.67 | 4.42E-04  | 1.33E-02 | 6.08E-04 | 5.12E-03 | 8.37E-01 | 9.83E-01 | 9.70E-01 |
| 565.90218 | 56.14  | 11.34 | 11.41 | 14.37 | 14.15 | 7.03E-24  | 9.96E-01 | 4.24E-14 | 1.04E-13 | 4.56E-14 | 9.69E-13 | 9.14E-01 |
| 565.92196 | 50.52  | 10.24 | 12.26 | 12.97 | 13.36 | 3.76E-12  | 1.62E-05 | 2.13E-09 | 4.19E-11 | 3.47E-01 | 6.45E-02 | 8.10E-01 |
| 566.05235 | 16.85  | 19.38 | 21.14 | 20.99 | 20.71 | 1.34E-40  | 5.11E-15 | 5.11E-15 | 1.67E-14 | 5.63E-01 | 2.41E-03 | 9.30E-02 |
| 566.10763 | 19.11  | 16.76 | 16.15 | 15.26 | 16.55 | 6.72E-04  | 3.67E-01 | 4.70E-04 | 9.47E-01 | 9.96E-02 | 7.46E-01 | 6.93E-03 |
| 566.25013 | 151.03 | 18.46 | 16.17 | 16.50 | 17.11 | 2.86E-26  | 9.33E-15 | 4.22E-14 | 5.85E-10 | 3.53E-01 | 3.90E-05 | 1.37E-02 |
| 566.34278 | 220.81 | 24.67 | 22.62 | 22.17 | 22.54 | 2.10E-48  | 5.11E-15 | 5.11E-15 | 5.11E-15 | 1.06E-02 | 9.59E-01 | 5.50E-02 |
| 566.38296 | 209.41 | 12.53 | 15.36 | 15.96 | 14.41 | 7.05E-28  | 4.24E-14 | 5.33E-15 | 1.58E-09 | 1.43E-01 | 6.67E-03 | 1.06E-06 |
| 566.52124 | 289.12 | 15.82 | 14.51 | 15.09 | 16.51 | 7.46E-04  | 3.41E-02 | 4.13E-01 | 4.95E-01 | 6.41E-01 | 5.81E-04 | 2.49E-02 |

|           |        |       |       |       |       |           |          |          |          |          |          |          |
|-----------|--------|-------|-------|-------|-------|-----------|----------|----------|----------|----------|----------|----------|
| 566.69843 | 78.21  | 12.72 | 12.79 | 13.49 | 11.87 | 1.81E-03  | 9.98E-01 | 1.90E-01 | 1.44E-01 | 2.87E-01 | 1.15E-01 | 5.09E-04 |
| 566.71586 | 72.05  | 15.17 | 15.68 | 15.69 | 14.88 | 6.33E-06  | 1.88E-02 | 1.54E-02 | 3.44E-01 | 1.00E+00 | 9.51E-05 | 6.94E-05 |
| 566.7603  | 57.58  | 15.59 | 14.72 | 16.84 | 16.49 | 3.64E-28  | 2.45E-06 | 8.07E-12 | 2.28E-06 | 5.77E-15 | 4.29E-14 | 1.95E-01 |
| 566.7761  | 55.49  | 14.61 | 8.17  | 12.36 | 12.06 | 8.64E-32  | 5.11E-15 | 3.31E-06 | 3.40E-07 | 4.29E-14 | 8.82E-14 | 9.22E-01 |
| 566.8074  | 43.95  | 12.99 | 16.43 | 15.69 | 15.60 | 5.58E-47  | 5.11E-15 | 5.11E-15 | 5.11E-15 | 9.23E-04 | 2.98E-04 | 9.75E-01 |
| 566.83006 | 35.72  | 11.87 | 11.65 | 13.93 | 11.77 | 1.16E-05  | 9.72E-01 | 2.26E-04 | 9.97E-01 | 6.27E-05 | 9.96E-01 | 2.56E-04 |
| 566.85288 | 38.02  | 16.71 | 17.76 | 17.15 | 17.67 | 8.88E-11  | 1.03E-09 | 2.55E-02 | 6.34E-08 | 1.02E-03 | 9.42E-01 | 1.00E-02 |
| 566.87461 | 46.68  | 18.83 | 20.44 | 20.49 | 20.46 | 3.69E-30  | 1.98E-14 | 1.07E-14 | 2.29E-14 | 9.87E-01 | 9.99E-01 | 9.98E-01 |
| 566.97613 | 60.83  | 12.84 | 18.27 | 10.50 | 11.34 | 1.07E-125 | 5.11E-15 | 5.11E-15 | 4.44E-14 | 5.11E-15 | 5.11E-15 | 1.47E-06 |
| 566.99783 | 61.56  | 11.36 | 13.90 | 8.82  | 9.18  | 8.06E-44  | 6.22E-14 | 5.53E-14 | 1.09E-10 | 5.11E-15 | 5.11E-15 | 6.56E-01 |
| 567.05398 | 17.39  | 17.50 | 19.14 | 19.06 | 18.77 | 1.28E-33  | 5.11E-15 | 5.33E-15 | 4.46E-14 | 9.18E-01 | 2.34E-02 | 1.10E-01 |
| 567.23485 | 163.45 | 17.45 | 17.87 | 18.30 | 17.44 | 7.37E-11  | 7.22E-03 | 1.65E-09 | 1.00E+00 | 7.55E-03 | 9.29E-03 | 6.99E-09 |
| 567.25358 | 146.42 | 16.49 | 12.67 | 12.86 | 13.94 | 7.71E-58  | 5.11E-15 | 5.11E-15 | 5.11E-15 | 7.58E-01 | 5.80E-09 | 6.75E-07 |
| 567.29416 | 170.79 | 12.44 | 15.47 | 17.11 | 12.67 | 3.85E-26  | 6.97E-11 | 2.35E-14 | 9.51E-01 | 1.01E-03 | 1.10E-08 | 4.25E-14 |
| 567.35598 | 289.93 | 16.33 | 18.89 | 19.28 | 18.93 | 4.08E-17  | 9.31E-12 | 4.65E-14 | 1.54E-11 | 6.72E-01 | 1.00E+00 | 7.52E-01 |
| 567.53645 | 297.37 | 17.37 | 19.56 | 20.44 | 19.67 | 2.51E-10  | 9.07E-06 | 1.88E-10 | 5.01E-06 | 2.11E-01 | 9.95E-01 | 3.52E-01 |
| 567.84101 | 40.14  | 15.66 | 15.89 | 14.60 | 15.26 | 1.18E-03  | 9.05E-01 | 7.59E-03 | 6.34E-01 | 1.04E-03 | 2.76E-01 | 2.32E-01 |
| 567.87772 | 45.39  | 13.81 | 16.44 | 16.40 | 16.47 | 8.32E-28  | 3.15E-14 | 3.42E-14 | 3.38E-14 | 9.99E-01 | 9.99E-01 | 9.92E-01 |
| 567.92678 | 62.78  | 16.47 | 13.23 | 17.17 | 17.26 | 9.18E-46  | 5.11E-15 | 1.50E-02 | 6.25E-03 | 5.11E-15 | 5.11E-15 | 9.82E-01 |
| 567.98302 | 62.25  | 12.61 | 14.29 | 10.64 | 11.30 | 2.09E-106 | 5.11E-15 | 5.11E-15 | 5.11E-15 | 5.11E-15 | 5.11E-15 | 6.59E-11 |
| 568.23773 | 163.82 | 15.25 | 15.66 | 16.08 | 15.13 | 2.54E-07  | 7.82E-02 | 8.51E-06 | 8.96E-01 | 7.08E-02 | 1.75E-02 | 1.12E-06 |
| 568.26793 | 168.15 | 22.58 | 21.55 | 22.26 | 21.12 | 1.52E-10  | 1.14E-05 | 4.18E-01 | 8.98E-10 | 6.07E-03 | 2.30E-01 | 3.56E-06 |
| 568.36237 | 226.64 | 21.88 | 25.02 | 25.21 | 25.48 | 1.76E-24  | 4.17E-14 | 4.20E-14 | 4.11E-14 | 9.47E-01 | 5.66E-01 | 8.67E-01 |
| 568.53901 | 297.39 | 15.39 | 18.17 | 19.12 | 18.23 | 2.24E-11  | 9.94E-07 | 2.71E-11 | 1.13E-06 | 2.71E-01 | 1.00E+00 | 3.49E-01 |
| 568.78721 | 52.63  | 15.52 | 15.64 | 15.97 | 15.61 | 6.55E-03  | 8.01E-01 | 4.29E-03 | 9.15E-01 | 7.62E-02 | 9.96E-01 | 4.98E-02 |
| 568.7904  | 143.1  | 14.03 | 10.70 | 9.55  | 11.34 | 7.58E-16  | 1.18E-09 | 4.35E-14 | 2.03E-06 | 1.07E-01 | 6.20E-01 | 3.82E-03 |
| 568.81155 | 48.4   | 19.48 | 19.44 | 19.69 | 19.80 | 8.02E-04  | 9.85E-01 | 1.20E-01 | 5.83E-03 | 6.20E-02 | 2.53E-03 | 6.59E-01 |
| 568.8377  | 39.78  | 20.20 | 22.34 | 22.46 | 22.27 | 4.30E-44  | 5.11E-15 | 5.11E-15 | 5.11E-15 | 8.54E-01 | 9.61E-01 | 5.80E-01 |
| 568.87164 | 43.55  | 15.56 | 17.31 | 17.25 | 17.57 | 1.01E-18  | 2.88E-13 | 8.77E-13 | 4.24E-14 | 9.93E-01 | 6.70E-01 | 5.00E-01 |
| 568.91606 | 67.85  | 13.79 | 17.33 | 11.93 | 12.57 | 5.47E-138 | 5.11E-15 | 5.11E-15 | 5.11E-15 | 5.11E-15 | 5.11E-15 | 1.28E-09 |
| 568.9762  | 62.14  | 13.27 | 15.20 | 11.21 | 11.89 | 1.44E-107 | 5.11E-15 | 5.11E-15 | 5.11E-15 | 5.11E-15 | 5.11E-15 | 2.60E-10 |
| 569.00901 | 17.66  | 10.24 | 15.93 | 16.29 | 15.27 | 3.21E-36  | 5.11E-15 | 5.11E-15 | 2.00E-14 | 8.50E-01 | 4.78E-01 | 1.16E-01 |
| 569.23132 | 160.91 | 11.52 | 11.26 | 12.81 | 11.24 | 3.85E-05  | 8.80E-01 | 1.98E-03 | 8.63E-01 | 1.82E-04 | 1.00E+00 | 2.20E-04 |
| 569.2716  | 167.33 | 20.64 | 19.41 | 19.96 | 19.24 | 2.90E-10  | 7.68E-08 | 6.41E-03 | 2.25E-09 | 4.85E-02 | 8.64E-01 | 5.71E-03 |
| 569.36606 | 225.68 | 20.71 | 24.25 | 23.51 | 23.98 | 2.78E-22  | 4.17E-14 | 1.71E-13 | 4.29E-14 | 1.64E-01 | 8.87E-01 | 5.69E-01 |
| 569.54268 | 297.36 | 14.25 | 14.72 | 16.32 | 15.82 | 1.42E-06  | 6.54E-01 | 3.46E-06 | 1.23E-03 | 8.40E-04 | 5.36E-02 | 6.36E-01 |
| 569.81894 | 46.74  | 15.67 | 15.24 | 14.36 | 15.16 | 1.02E-07  | 1.77E-01 | 1.66E-08 | 9.09E-02 | 4.63E-04 | 9.85E-01 | 2.46E-03 |
| 569.84129 | 42.91  | 16.26 | 18.66 | 18.83 | 18.66 | 1.60E-40  | 5.11E-15 | 5.11E-15 | 5.11E-15 | 7.58E-01 | 1.00E+00 | 7.68E-01 |
| 569.91615 | 40.76  | 15.76 | 17.60 | 17.48 | 16.71 | 3.19E-16  | 7.31E-14 | 5.50E-13 | 2.11E-04 | 9.57E-01 | 7.93E-04 | 4.21E-03 |
| 569.99189 | 22.04  | 13.04 | 17.60 | 17.62 | 16.93 | 1.25E-35  | 5.11E-15 | 5.11E-15 | 2.62E-14 | 1.00E+00 | 2.40E-01 | 2.11E-01 |
| 570.2804  | 152.16 | 21.80 | 20.94 | 21.23 | 21.06 | 2.16E-14  | 1.79E-13 | 7.34E-07 | 2.76E-10 | 3.62E-02 | 7.40E-01 | 3.70E-01 |
| 570.34197 | 202.98 | 16.57 | 15.73 | 15.90 | 14.56 | 6.04E-16  | 3.82E-04 | 7.06E-03 | 4.34E-14 | 8.43E-01 | 1.53E-06 | 1.97E-08 |
| 570.36876 | 223.69 | 18.65 | 20.51 | 19.67 | 21.13 | 4.98E-12  | 1.38E-07 | 8.10E-03 | 7.87E-12 | 5.37E-02 | 2.64E-01 | 1.27E-04 |
| 570.74884 | 65.85  | 15.68 | 14.81 | 16.16 | 15.83 | 5.67E-18  | 3.66E-09 | 2.19E-03 | 7.23E-01 | 4.39E-14 | 7.40E-11 | 8.26E-02 |
| 570.77064 | 54.12  | 21.90 | 22.46 | 23.00 | 22.81 | 2.25E-45  | 4.31E-14 | 5.11E-15 | 5.11E-15 | 6.69E-14 | 1.50E-06 | 2.21E-02 |

|           |        |       |       |       |       |           |          |          |          |          |          |          |
|-----------|--------|-------|-------|-------|-------|-----------|----------|----------|----------|----------|----------|----------|
| 570.8091  | 52.37  | 17.18 | 17.09 | 17.48 | 17.59 | 4.35E-05  | 8.84E-01 | 3.39E-02 | 2.51E-03 | 4.85E-03 | 2.64E-04 | 8.01E-01 |
| 570.83046 | 47.92  | 18.07 | 20.03 | 20.21 | 20.06 | 4.45E-44  | 5.11E-15 | 5.11E-15 | 5.11E-15 | 5.57E-01 | 9.99E-01 | 6.78E-01 |
| 570.91549 | 69.19  | 10.17 | 12.78 | 9.02  | 9.55  | 5.01E-51  | 5.11E-15 | 2.26E-08 | 8.39E-03 | 5.11E-15 | 5.11E-15 | 4.00E-02 |
| 570.93267 | 62.28  | 8.10  | 17.58 | 9.24  | 8.71  | 2.71E-52  | 5.11E-15 | 9.82E-02 | 6.28E-01 | 5.11E-15 | 5.11E-15 | 7.41E-01 |
| 571.11284 | 72.23  | 8.80  | 9.52  | 11.22 | 12.03 | 1.41E-13  | 3.08E-01 | 7.18E-08 | 4.00E-12 | 4.09E-04 | 1.46E-07 | 2.38E-01 |
| 571.21584 | 63.59  | 13.91 | 14.77 | 12.10 | 12.74 | 5.95E-69  | 1.58E-13 | 5.11E-15 | 2.91E-14 | 5.11E-15 | 5.11E-15 | 1.24E-07 |
| 571.2891  | 163.59 | 21.82 | 21.48 | 21.71 | 21.27 | 4.81E-06  | 8.14E-03 | 7.23E-01 | 5.64E-06 | 1.45E-01 | 2.48E-01 | 5.85E-04 |
| 571.34941 | 193.76 | 14.18 | 13.22 | 13.99 | 13.40 | 2.11E-02  | 3.22E-02 | 9.45E-01 | 1.30E-01 | 1.38E-01 | 9.63E-01 | 3.70E-01 |
| 571.37113 | 208.62 | 16.48 | 18.08 | 16.53 | 18.50 | 2.21E-13  | 5.93E-07 | 9.99E-01 | 6.38E-10 | 2.17E-06 | 5.16E-01 | 3.10E-09 |
| 571.77366 | 55.5   | 18.04 | 18.48 | 19.19 | 18.95 | 2.12E-41  | 1.57E-08 | 5.11E-15 | 5.33E-15 | 4.20E-14 | 6.04E-09 | 7.51E-03 |
| 571.8346  | 47.13  | 13.04 | 15.17 | 15.57 | 15.43 | 1.74E-23  | 4.64E-14 | 4.06E-14 | 4.36E-14 | 3.82E-01 | 7.41E-01 | 9.50E-01 |
| 571.92933 | 48.88  | 11.83 | 14.46 | 14.03 | 13.45 | 1.04E-09  | 1.88E-09 | 4.68E-07 | 6.28E-04 | 7.11E-01 | 7.67E-02 | 5.02E-01 |
| 572.0369  | 17.13  | 11.89 | 15.81 | 15.11 | 13.02 | 1.51E-22  | 3.99E-14 | 5.13E-14 | 2.08E-02 | 2.65E-01 | 1.62E-10 | 1.67E-06 |
| 572.29651 | 160.02 | 21.71 | 20.82 | 21.00 | 20.64 | 4.10E-20  | 6.86E-14 | 4.71E-10 | 4.24E-14 | 3.54E-01 | 3.32E-01 | 5.96E-03 |
| 572.32108 | 178.08 | 11.55 | 14.57 | 15.00 | 12.44 | 2.82E-35  | 9.33E-15 | 5.11E-15 | 4.08E-03 | 3.72E-01 | 9.09E-13 | 4.46E-14 |
| 572.70774 | 67.99  | 16.73 | 16.87 | 18.13 | 17.61 | 1.63E-21  | 7.33E-01 | 4.32E-14 | 2.34E-08 | 4.57E-14 | 7.16E-06 | 2.55E-03 |
| 572.72868 | 65.74  | 14.82 | 13.13 | 15.91 | 15.29 | 4.53E-35  | 4.24E-14 | 2.66E-08 | 5.74E-02 | 5.11E-15 | 1.80E-14 | 6.14E-03 |
| 572.74674 | 66.22  | 15.04 | 12.74 | 14.59 | 14.33 | 1.23E-43  | 5.11E-15 | 3.75E-03 | 1.71E-06 | 5.11E-15 | 1.35E-14 | 2.19E-01 |
| 572.76872 | 53.76  | 20.47 | 20.89 | 21.50 | 21.28 | 1.28E-45  | 3.18E-11 | 5.11E-15 | 5.11E-15 | 4.25E-14 | 6.92E-09 | 2.54E-03 |
| 572.7861  | 53.93  | 17.61 | 18.49 | 19.04 | 18.78 | 5.50E-47  | 2.26E-14 | 5.11E-15 | 5.11E-15 | 2.42E-10 | 3.05E-03 | 7.40E-03 |
| 572.82497 | 46.86  | 16.32 | 15.66 | 16.27 | 16.44 | 5.45E-05  | 6.47E-04 | 9.89E-01 | 8.95E-01 | 2.69E-03 | 9.36E-05 | 7.54E-01 |
| 572.88227 | 39.47  | 14.39 | 13.34 | 14.00 | 14.39 | 2.40E-02  | 2.84E-02 | 7.11E-01 | 1.00E+00 | 3.21E-01 | 4.33E-02 | 7.50E-01 |
| 572.92911 | 67.79  | 11.87 | 12.81 | 10.09 | 10.62 | 4.90E-73  | 4.12E-14 | 5.11E-15 | 7.55E-15 | 5.11E-15 | 5.11E-15 | 5.78E-06 |
| 573.17213 | 63.72  | 18.63 | 21.97 | 18.17 | 18.22 | 2.88E-134 | 5.11E-15 | 6.94E-09 | 7.07E-07 | 5.11E-15 | 5.11E-15 | 9.15E-01 |
| 573.19605 | 64.5   | 14.12 | 17.57 | 12.32 | 12.91 | 4.12E-130 | 5.11E-15 | 5.11E-15 | 6.88E-15 | 5.11E-15 | 5.11E-15 | 9.11E-08 |
| 573.24312 | 163.13 | 15.71 | 14.44 | 14.72 | 14.82 | 2.66E-10  | 3.44E-10 | 8.60E-07 | 2.24E-05 | 4.54E-01 | 2.23E-01 | 9.60E-01 |
| 573.29997 | 167.99 | 19.76 | 18.80 | 18.97 | 18.64 | 2.12E-20  | 4.75E-14 | 4.79E-11 | 4.31E-14 | 4.24E-01 | 5.42E-01 | 2.57E-02 |
| 573.3316  | 175.02 | 12.27 | 12.77 | 13.04 | 13.84 | 1.11E-02  | 6.89E-01 | 3.17E-01 | 4.92E-03 | 9.36E-01 | 1.18E-01 | 3.38E-01 |
| 573.74595 | 60.47  | 12.91 | 10.77 | 13.05 | 12.70 | 2.29E-19  | 4.37E-14 | 9.30E-01 | 8.23E-01 | 4.35E-14 | 4.06E-12 | 4.86E-01 |
| 573.77171 | 55.97  | 16.14 | 16.14 | 17.14 | 16.87 | 1.15E-30  | 1.00E+00 | 1.09E-14 | 1.13E-13 | 1.73E-14 | 2.71E-13 | 1.90E-02 |
| 573.78616 | 45.62  | 13.23 | 13.38 | 13.30 | 13.44 | 6.69E-01  | 8.32E-01 | 9.80E-01 | 6.46E-01 | 9.68E-01 | 9.87E-01 | 8.62E-01 |
| 573.86622 | 45.29  | 13.07 | 13.59 | 12.86 | 13.42 | 1.16E-01  | 3.70E-01 | 9.06E-01 | 7.23E-01 | 1.15E-01 | 9.55E-01 | 3.44E-01 |
| 573.94758 | 44.66  | 12.58 | 12.96 | 13.17 | 12.92 | 1.39E-02  | 1.54E-01 | 6.54E-03 | 2.60E-01 | 6.77E-01 | 9.96E-01 | 5.58E-01 |
| 574.02927 | 22.67  | 9.52  | 11.96 | 12.21 | 11.36 | 1.20E-23  | 4.33E-14 | 3.11E-14 | 5.79E-11 | 7.69E-01 | 1.05E-01 | 7.40E-03 |
| 574.17758 | 55.65  | 18.25 | 21.38 | 17.78 | 17.83 | 7.40E-135 | 5.11E-15 | 2.29E-10 | 4.42E-08 | 5.11E-15 | 5.11E-15 | 9.00E-01 |
| 574.19741 | 65.67  | 14.11 | 15.39 | 12.40 | 12.98 | 8.66E-92  | 5.11E-15 | 5.11E-15 | 5.11E-15 | 5.11E-15 | 5.11E-15 | 3.36E-09 |
| 574.30984 | 174.57 | 17.79 | 16.18 | 16.56 | 16.10 | 3.15E-26  | 3.24E-14 | 8.57E-14 | 2.49E-14 | 6.41E-02 | 9.47E-01 | 1.66E-02 |
| 574.70596 | 69.46  | 15.16 | 15.16 | 16.58 | 16.12 | 2.15E-14  | 1.00E+00 | 1.20E-11 | 1.33E-05 | 5.13E-11 | 2.69E-05 | 1.02E-01 |
| 574.72342 | 63.11  | 17.66 | 17.76 | 18.98 | 18.56 | 3.00E-21  | 8.82E-01 | 4.44E-14 | 5.06E-09 | 4.60E-14 | 5.09E-07 | 1.85E-02 |
| 574.76615 | 56.77  | 17.00 | 17.25 | 18.16 | 17.84 | 1.84E-33  | 1.88E-02 | 5.11E-15 | 4.27E-14 | 3.95E-14 | 1.69E-09 | 2.66E-03 |
| 574.78228 | 52.02  | 17.78 | 17.91 | 18.55 | 18.47 | 8.02E-19  | 4.75E-01 | 5.08E-14 | 7.73E-12 | 2.04E-10 | 5.94E-08 | 8.54E-01 |
| 574.79857 | 39.64  | 16.84 | 17.86 | 18.10 | 18.13 | 3.60E-22  | 6.81E-13 | 4.33E-14 | 4.26E-14 | 2.78E-01 | 2.14E-01 | 9.97E-01 |
| 574.81783 | 41.66  | 14.15 | 12.38 | 13.65 | 13.21 | 2.41E-07  | 7.13E-08 | 3.36E-01 | 1.38E-02 | 2.50E-04 | 4.21E-02 | 5.03E-01 |
| 574.84039 | 47.43  | 15.45 | 14.15 | 13.65 | 14.36 | 1.68E-06  | 6.37E-04 | 6.16E-07 | 8.03E-03 | 4.48E-01 | 9.32E-01 | 1.71E-01 |
| 574.86193 | 40.59  | 18.18 | 20.79 | 20.43 | 20.48 | 2.09E-25  | 2.53E-14 | 4.30E-14 | 4.50E-14 | 4.37E-01 | 5.93E-01 | 9.97E-01 |

|           |        |       |       |       |       |           |          |          |          |          |          |          |          |
|-----------|--------|-------|-------|-------|-------|-----------|----------|----------|----------|----------|----------|----------|----------|
| 574.9904  | 63.23  | 12.52 | 14.06 | 10.57 | 11.21 | 1.38E-96  | 5.11E-15 | 5.11E-15 | 5.11E-15 | 5.11E-15 | 5.11E-15 | 5.11E-15 | 2.50E-09 |
| 575.17247 | 55.68  | 12.45 | 20.44 | 10.40 | 11.05 | 5.77E-129 | 5.11E-15 | 3.60E-14 | 1.39E-10 | 5.11E-15 | 5.11E-15 | 5.11E-15 | 9.17E-03 |
| 575.2609  | 151.73 | 18.58 | 18.07 | 18.58 | 18.51 | 3.37E-06  | 1.45E-05 | 1.00E+00 | 9.03E-01 | 2.63E-05 | 6.76E-04 | 9.20E-01 | 9.20E-01 |
| 575.30938 | 166.25 | 13.46 | 10.25 | 9.80  | 10.02 | 3.08E-24  | 4.37E-14 | 3.82E-14 | 4.36E-14 | 5.73E-01 | 9.21E-01 | 9.28E-01 | 9.28E-01 |
| 575.31962 | 174.96 | 13.65 | 10.73 | 11.00 | 10.91 | 1.05E-13  | 1.88E-11 | 7.71E-10 | 7.67E-10 | 9.04E-01 | 9.73E-01 | 9.96E-01 | 9.96E-01 |
| 575.44711 | 257.5  | 14.94 | 14.87 | 15.68 | 16.03 | 5.27E-04  | 9.96E-01 | 7.46E-02 | 3.77E-03 | 5.24E-02 | 2.56E-03 | 7.02E-01 | 7.02E-01 |
| 575.79009 | 49.94  | 12.45 | 13.04 | 13.37 | 13.21 | 3.17E-02  | 2.78E-01 | 2.58E-02 | 1.07E-01 | 7.55E-01 | 9.56E-01 | 9.70E-01 | 9.70E-01 |
| 575.86531 | 41.28  | 13.26 | 16.45 | 16.04 | 16.22 | 9.75E-20  | 4.22E-14 | 1.77E-13 | 7.79E-14 | 6.43E-01 | 9.14E-01 | 9.62E-01 | 9.62E-01 |
| 576.0763  | 18.05  | 13.10 | 16.53 | 15.44 | 14.42 | 4.63E-13  | 2.57E-13 | 4.31E-07 | 1.39E-02 | 5.72E-02 | 2.39E-05 | 1.03E-01 | 1.03E-01 |
| 576.17646 | 63.87  | 13.43 | 16.02 | 11.44 | 12.14 | 5.77E-113 | 5.11E-15 | 5.11E-15 | 5.77E-15 | 5.11E-15 | 5.11E-15 | 5.11E-15 | 2.29E-09 |
| 576.26481 | 162.27 | 16.69 | 15.89 | 16.45 | 16.41 | 1.41E-09  | 2.65E-10 | 1.70E-01 | 9.04E-02 | 1.73E-05 | 1.55E-04 | 9.85E-01 | 9.85E-01 |
| 576.28731 | 189.08 | 13.90 | 11.87 | 11.61 | 12.54 | 3.75E-11  | 1.93E-08 | 1.51E-10 | 4.36E-04 | 8.63E-01 | 2.21E-01 | 3.70E-02 | 3.70E-02 |
| 576.33123 | 196.88 | 18.75 | 18.21 | 18.45 | 17.96 | 3.05E-05  | 4.73E-03 | 2.19E-01 | 1.58E-05 | 4.76E-01 | 4.48E-01 | 2.12E-02 | 2.12E-02 |
| 576.71895 | 63.37  | 17.17 | 16.06 | 17.80 | 17.52 | 7.54E-29  | 8.06E-14 | 1.21E-05 | 4.72E-02 | 5.11E-15 | 3.91E-14 | 1.69E-01 | 1.69E-01 |
| 576.77827 | 54.22  | 15.80 | 15.33 | 16.02 | 16.22 | 7.25E-07  | 1.24E-02 | 4.50E-01 | 3.90E-02 | 7.75E-05 | 5.41E-07 | 6.10E-01 | 6.10E-01 |
| 576.79961 | 38.62  | 18.28 | 18.94 | 18.02 | 18.60 | 1.93E-09  | 1.48E-05 | 2.03E-01 | 1.13E-01 | 1.36E-09 | 8.14E-02 | 3.73E-04 | 3.73E-04 |
| 576.82644 | 52.06  | 15.86 | 15.10 | 16.28 | 16.40 | 1.90E-15  | 3.77E-06 | 2.33E-02 | 2.99E-03 | 1.40E-12 | 1.17E-13 | 8.85E-01 | 8.85E-01 |
| 576.85772 | 42.37  | 16.00 | 17.66 | 17.14 | 17.44 | 2.52E-14  | 2.24E-13 | 2.87E-07 | 3.46E-10 | 6.52E-02 | 7.43E-01 | 4.99E-01 | 4.99E-01 |
| 576.93808 | 58.05  | 11.82 | 10.71 | 13.94 | 13.54 | 3.19E-17  | 1.31E-02 | 6.63E-08 | 3.36E-05 | 4.49E-14 | 1.45E-11 | 7.13E-01 | 7.13E-01 |
| 577.06246 | 19.33  | 13.51 | 17.50 | 17.64 | 16.88 | 7.55E-32  | 6.22E-15 | 5.33E-15 | 4.31E-14 | 9.76E-01 | 2.86E-01 | 1.27E-01 | 1.27E-01 |
| 577.25541 | 164.15 | 16.64 | 16.09 | 16.72 | 16.70 | 3.63E-04  | 4.23E-03 | 9.60E-01 | 9.79E-01 | 9.67E-04 | 2.04E-03 | 1.00E+00 | 1.00E+00 |
| 577.27665 | 172.91 | 18.51 | 17.64 | 18.01 | 18.02 | 2.38E-12  | 2.43E-13 | 2.23E-05 | 8.80E-05 | 5.16E-03 | 4.54E-03 | 9.99E-01 | 9.99E-01 |
| 577.34526 | 261.66 | 16.00 | 16.38 | 16.20 | 16.39 | 5.48E-01  | 5.99E-01 | 9.11E-01 | 5.94E-01 | 9.39E-01 | 1.00E+00 | 9.32E-01 | 9.32E-01 |
| 577.37511 | 200.83 | 13.54 | 15.51 | 14.59 | 12.39 | 4.15E-05  | 1.06E-02 | 3.35E-01 | 2.85E-01 | 4.80E-01 | 2.73E-05 | 5.39E-03 | 5.39E-03 |
| 577.80576 | 42.66  | 13.84 | 13.61 | 13.02 | 13.71 | 1.39E-03  | 7.05E-01 | 9.91E-04 | 9.40E-01 | 4.20E-02 | 9.67E-01 | 1.33E-02 | 1.33E-02 |
| 577.89625 | 38.74  | 12.63 | 10.92 | 11.93 | 12.07 | 4.37E-03  | 1.62E-03 | 4.21E-01 | 6.42E-01 | 1.48E-01 | 9.01E-02 | 9.91E-01 | 9.91E-01 |
| 578.08919 | 24.66  | 13.69 | 12.72 | 11.78 | 12.00 | 1.09E-04  | 1.31E-01 | 1.34E-04 | 1.52E-03 | 1.69E-01 | 4.20E-01 | 9.67E-01 | 9.67E-01 |
| 578.28164 | 171.11 | 16.65 | 16.06 | 16.49 | 15.88 | 8.25E-05  | 5.50E-03 | 7.99E-01 | 2.37E-04 | 8.33E-02 | 7.98E-01 | 7.38E-03 | 7.38E-03 |
| 578.30324 | 200.64 | 19.05 | 19.36 | 19.34 | 19.31 | 4.49E-02  | 6.30E-02 | 9.21E-02 | 1.64E-01 | 9.98E-01 | 9.86E-01 | 9.98E-01 | 9.98E-01 |
| 578.32752 | 144.28 | 14.29 | 13.78 | 14.26 | 13.99 | 4.64E-01  | 4.85E-01 | 1.00E+00 | 8.55E-01 | 5.59E-01 | 9.40E-01 | 8.98E-01 | 8.98E-01 |
| 578.34692 | 225.43 | 23.82 | 24.51 | 24.27 | 24.05 | 2.22E-05  | 1.01E-05 | 8.33E-03 | 3.85E-01 | 3.22E-01 | 1.11E-02 | 4.54E-01 | 4.54E-01 |
| 578.51604 | 238.43 | 12.33 | 15.69 | 15.88 | 16.04 | 1.31E-13  | 1.55E-09 | 1.27E-10 | 8.30E-11 | 9.84E-01 | 9.13E-01 | 9.90E-01 | 9.90E-01 |
| 578.71384 | 61.74  | 15.76 | 12.31 | 16.01 | 16.14 | 2.90E-37  | 5.11E-15 | 7.73E-01 | 5.08E-01 | 5.11E-15 | 5.11E-15 | 9.69E-01 | 9.69E-01 |
| 578.73632 | 65.64  | 16.47 | 16.08 | 16.51 | 16.18 | 5.10E-03  | 2.68E-02 | 9.92E-01 | 1.77E-01 | 1.42E-02 | 9.01E-01 | 1.09E-01 | 1.09E-01 |
| 578.75735 | 57.06  | 12.57 | 8.65  | 13.56 | 12.44 | 7.36E-13  | 6.83E-09 | 3.67E-01 | 9.97E-01 | 1.41E-12 | 1.21E-07 | 3.01E-01 | 3.01E-01 |
| 578.77727 | 60.53  | 15.08 | 12.71 | 14.85 | 14.93 | 1.97E-24  | 3.11E-14 | 7.27E-01 | 9.12E-01 | 4.31E-14 | 4.26E-14 | 9.87E-01 | 9.87E-01 |
| 578.79799 | 47.98  | 15.55 | 13.86 | 13.99 | 14.18 | 1.58E-15  | 1.89E-13 | 5.41E-12 | 4.71E-09 | 9.19E-01 | 4.44E-01 | 8.14E-01 | 8.14E-01 |
| 578.81486 | 43.36  | 19.45 | 21.06 | 20.76 | 20.68 | 8.72E-34  | 5.11E-15 | 1.44E-14 | 4.00E-14 | 5.36E-02 | 1.10E-02 | 9.16E-01 | 9.16E-01 |
| 578.87295 | 41.21  | 14.44 | 17.03 | 16.89 | 17.04 | 1.40E-25  | 4.06E-14 | 4.25E-14 | 4.22E-14 | 9.46E-01 | 1.00E+00 | 9.35E-01 | 9.35E-01 |
| 579.0113  | 210.39 | 13.93 | 14.89 | 14.98 | 13.60 | 1.01E-09  | 2.25E-04 | 3.42E-05 | 4.93E-01 | 9.79E-01 | 1.28E-06 | 1.47E-07 | 1.47E-07 |
| 579.08629 | 25.96  | 13.80 | 14.80 | 14.79 | 12.18 | 7.77E-07  | 1.71E-01 | 1.70E-01 | 7.37E-03 | 1.00E+00 | 4.23E-06 | 3.71E-06 | 3.71E-06 |
| 579.18205 | 65.06  | 14.08 | 15.31 | 12.34 | 12.94 | 4.35E-69  | 3.35E-14 | 5.11E-15 | 4.44E-14 | 5.11E-15 | 5.11E-15 | 8.19E-06 | 8.19E-06 |
| 579.29829 | 191.58 | 17.90 | 17.73 | 17.83 | 17.63 | 1.93E-01  | 5.61E-01 | 9.49E-01 | 1.64E-01 | 8.76E-01 | 8.62E-01 | 4.25E-01 | 4.25E-01 |
| 579.35058 | 228.41 | 22.07 | 22.79 | 22.53 | 22.32 | 1.03E-05  | 4.03E-06 | 6.96E-03 | 3.30E-01 | 2.54E-01 | 8.41E-03 | 4.82E-01 | 4.82E-01 |
| 579.44146 | 231.42 | 15.73 | 11.84 | 11.23 | 13.86 | 2.54E-33  | 1.04E-14 | 5.11E-15 | 6.05E-07 | 2.78E-01 | 1.53E-07 | 5.79E-12 | 5.79E-12 |

|           |        |       |       |       |       |           |          |          |          |          |          |          |
|-----------|--------|-------|-------|-------|-------|-----------|----------|----------|----------|----------|----------|----------|
| 579.75584 | 58.05  | 12.47 | 10.26 | 12.68 | 12.57 | 2.67E-13  | 4.57E-10 | 9.13E-01 | 9.91E-01 | 2.41E-11 | 6.86E-10 | 9.87E-01 |
| 579.81793 | 45.66  | 14.32 | 16.69 | 16.14 | 16.00 | 1.51E-25  | 7.99E-15 | 4.47E-14 | 1.59E-13 | 3.74E-02 | 6.03E-03 | 8.96E-01 |
| 579.85506 | 38.29  | 16.13 | 16.72 | 16.97 | 16.20 | 3.11E-03  | 9.94E-02 | 6.07E-03 | 9.93E-01 | 7.80E-01 | 2.21E-01 | 2.36E-02 |
| 580.29273 | 195.63 | 18.22 | 17.69 | 17.67 | 17.76 | 1.07E-05  | 1.28E-04 | 4.63E-05 | 1.63E-03 | 9.97E-01 | 9.52E-01 | 8.89E-01 |
| 580.32566 | 186.88 | 18.61 | 18.57 | 18.59 | 18.36 | 6.91E-01  | 9.98E-01 | 9.99E-01 | 6.84E-01 | 1.00E+00 | 7.97E-01 | 7.60E-01 |
| 580.35933 | 242.83 | 23.84 | 20.45 | 20.09 | 21.14 | 1.18E-66  | 5.11E-15 | 5.11E-15 | 5.11E-15 | 1.31E-01 | 3.12E-04 | 1.05E-08 |
| 580.67399 | 75.7   | 12.92 | 14.91 | 14.94 | 13.56 | 9.08E-07  | 2.48E-05 | 1.48E-05 | 4.52E-01 | 1.00E+00 | 1.42E-02 | 1.06E-02 |
| 580.69509 | 91.06  | 11.57 | 12.03 | 12.54 | 11.45 | 4.37E-02  | 6.77E-01 | 8.12E-02 | 9.91E-01 | 6.11E-01 | 5.31E-01 | 5.40E-02 |
| 580.73431 | 74.98  | 14.96 | 13.11 | 14.38 | 14.01 | 2.14E-19  | 3.93E-14 | 6.26E-03 | 2.20E-06 | 1.26E-10 | 1.53E-05 | 1.83E-01 |
| 580.75235 | 61.5   | 16.99 | 16.24 | 17.65 | 17.17 | 3.54E-19  | 2.34E-07 | 5.53E-06 | 5.52E-01 | 3.93E-14 | 1.15E-09 | 3.27E-03 |
| 580.81063 | 34.41  | 17.21 | 18.54 | 18.68 | 18.27 | 4.27E-20  | 4.64E-14 | 4.27E-14 | 4.21E-10 | 8.09E-01 | 3.43E-01 | 5.49E-02 |
| 580.86871 | 40.3   | 13.14 | 11.94 | 11.82 | 13.31 | 2.33E-02  | 1.80E-01 | 1.12E-01 | 9.92E-01 | 9.97E-01 | 1.26E-01 | 7.72E-02 |
| 580.8903  | 46.59  | 16.83 | 17.41 | 17.50 | 17.54 | 3.34E-03  | 3.82E-02 | 9.95E-03 | 7.68E-03 | 9.75E-01 | 9.34E-01 | 9.98E-01 |
| 580.91103 | 35.68  | 12.84 | 12.96 | 13.44 | 13.31 | 4.39E-02  | 9.63E-01 | 5.64E-02 | 2.19E-01 | 1.93E-01 | 4.89E-01 | 9.55E-01 |
| 580.9726  | 26.95  | 15.82 | 11.67 | 11.44 | 11.95 | 2.39E-18  | 1.04E-13 | 4.35E-14 | 6.08E-12 | 9.68E-01 | 9.56E-01 | 7.69E-01 |
| 580.99334 | 63.34  | 9.49  | 14.29 | 8.70  | 9.05  | 4.56E-133 | 5.11E-15 | 4.30E-12 | 3.25E-04 | 5.11E-15 | 5.11E-15 | 8.70E-03 |
| 581.00074 | 34.48  | 10.35 | 13.26 | 12.38 | 10.68 | 2.68E-26  | 1.89E-14 | 5.15E-13 | 5.83E-01 | 5.43E-03 | 4.15E-14 | 8.81E-09 |
| 581.24765 | 163.72 | 12.50 | 13.13 | 13.99 | 13.38 | 1.97E-05  | 1.48E-01 | 4.30E-06 | 2.15E-02 | 2.31E-02 | 8.54E-01 | 1.94E-01 |
| 581.29027 | 184.75 | 13.53 | 12.63 | 13.23 | 12.88 | 3.77E-02  | 2.98E-02 | 7.87E-01 | 2.08E-01 | 2.67E-01 | 8.83E-01 | 7.30E-01 |
| 581.32921 | 183.39 | 15.12 | 13.91 | 13.62 | 13.81 | 5.93E-04  | 1.22E-02 | 8.55E-04 | 6.83E-03 | 8.87E-01 | 9.94E-01 | 9.70E-01 |
| 581.36139 | 223.06 | 21.92 | 16.78 | 16.79 | 17.51 | 4.01E-65  | 5.11E-15 | 5.11E-15 | 5.11E-15 | 1.00E+00 | 1.94E-02 | 2.09E-02 |
| 581.45653 | 239.24 | 19.84 | 18.23 | 18.73 | 19.21 | 6.41E-26  | 6.00E-15 | 5.40E-14 | 2.22E-05 | 1.44E-03 | 1.46E-10 | 3.46E-03 |
| 581.77185 | 46.91  | 13.42 | 13.55 | 13.16 | 13.50 | 7.01E-02  | 8.10E-01 | 3.33E-01 | 9.58E-01 | 6.12E-02 | 9.85E-01 | 1.60E-01 |
| 581.80163 | 53.12  | 13.12 | 13.27 | 13.61 | 13.54 | 1.07E-02  | 8.08E-01 | 1.47E-02 | 6.12E-02 | 1.70E-01 | 3.84E-01 | 9.78E-01 |
| 581.85356 | 38.7   | 12.87 | 12.81 | 11.98 | 11.71 | 1.86E-02  | 9.99E-01 | 1.54E-01 | 4.48E-02 | 2.34E-01 | 7.79E-02 | 9.36E-01 |
| 581.88858 | 42.17  | 10.44 | 11.43 | 12.78 | 12.66 | 2.42E-07  | 1.13E-01 | 1.39E-06 | 1.16E-05 | 1.69E-02 | 4.57E-02 | 9.94E-01 |
| 582.22448 | 134.28 | 15.77 | 16.03 | 16.82 | 16.30 | 3.93E-05  | 6.33E-01 | 1.61E-05 | 9.01E-02 | 3.04E-03 | 6.55E-01 | 1.12E-01 |
| 582.25865 | 174.25 | 11.16 | 9.79  | 10.92 | 11.44 | 2.70E-03  | 1.14E-02 | 9.46E-01 | 9.26E-01 | 6.13E-02 | 2.66E-03 | 6.71E-01 |
| 582.28152 | 192.56 | 15.27 | 13.11 | 13.29 | 13.27 | 6.05E-09  | 1.46E-07 | 1.21E-06 | 2.38E-06 | 9.67E-01 | 9.78E-01 | 1.00E+00 |
| 582.34145 | 201.65 | 18.43 | 18.44 | 18.50 | 18.38 | 9.72E-01  | 1.00E+00 | 9.91E-01 | 9.97E-01 | 9.95E-01 | 9.95E-01 | 9.63E-01 |
| 582.3777  | 238.03 | 21.20 | 24.29 | 23.48 | 23.71 | 3.25E-26  | 7.99E-15 | 4.49E-14 | 4.31E-14 | 1.42E-02 | 1.54E-01 | 8.37E-01 |
| 582.45947 | 239.3  | 17.90 | 15.16 | 15.89 | 16.98 | 2.23E-20  | 4.15E-14 | 5.81E-12 | 5.25E-03 | 3.65E-02 | 3.58E-09 | 7.55E-04 |
| 582.6727  | 83.1   | 9.48  | 11.45 | 11.45 | 11.01 | 3.56E-05  | 1.78E-04 | 1.50E-04 | 7.70E-03 | 1.00E+00 | 8.08E-01 | 8.03E-01 |
| 582.69034 | 71.77  | 13.41 | 12.77 | 13.47 | 12.74 | 1.52E-03  | 3.16E-02 | 9.95E-01 | 2.92E-02 | 1.90E-02 | 1.00E+00 | 1.76E-02 |
| 582.74938 | 69.46  | 14.99 | 11.62 | 15.00 | 13.71 | 9.16E-26  | 2.09E-14 | 1.00E+00 | 2.69E-04 | 2.62E-14 | 1.72E-09 | 3.44E-04 |
| 582.78117 | 51.44  | 13.41 | 15.45 | 15.13 | 15.17 | 1.47E-17  | 4.46E-14 | 5.50E-12 | 9.35E-12 | 5.29E-01 | 6.65E-01 | 9.98E-01 |
| 582.80459 | 38.06  | 14.00 | 14.79 | 16.04 | 14.14 | 1.36E-07  | 1.34E-01 | 2.45E-07 | 9.82E-01 | 4.54E-03 | 3.30E-01 | 6.46E-06 |
| 582.82741 | 46.88  | 17.01 | 17.03 | 16.15 | 16.81 | 1.03E-07  | 1.00E+00 | 7.57E-07 | 6.20E-01 | 1.02E-06 | 5.81E-01 | 5.30E-04 |
| 582.84893 | 41.12  | 19.26 | 20.58 | 20.75 | 20.70 | 1.62E-33  | 1.62E-14 | 5.11E-15 | 6.66E-15 | 4.61E-01 | 7.45E-01 | 9.76E-01 |
| 582.95286 | 61.93  | 9.10  | 18.26 | 8.59  | 8.75  | 1.26E-110 | 5.11E-15 | 1.60E-01 | 5.01E-01 | 5.11E-15 | 5.11E-15 | 9.31E-01 |
| 582.97315 | 58.85  | 12.83 | 17.73 | 9.50  | 10.16 | 3.98E-86  | 5.11E-15 | 5.11E-15 | 4.36E-14 | 5.11E-15 | 5.11E-15 | 7.25E-02 |
| 583.22768 | 132.11 | 12.71 | 10.95 | 13.08 | 12.08 | 7.78E-09  | 1.51E-06 | 6.72E-01 | 2.55E-01 | 9.00E-09 | 7.26E-03 | 2.25E-02 |
| 583.25714 | 43.39  | 15.65 | 16.00 | 16.42 | 15.83 | 6.94E-02  | 6.47E-01 | 4.62E-02 | 9.35E-01 | 5.03E-01 | 9.50E-01 | 2.30E-01 |
| 583.34415 | 202.35 | 16.08 | 15.80 | 16.11 | 15.81 | 4.83E-01  | 6.87E-01 | 9.99E-01 | 7.38E-01 | 6.18E-01 | 1.00E+00 | 6.72E-01 |
| 583.38186 | 248.86 | 18.89 | 22.82 | 21.80 | 22.13 | 7.78E-31  | 5.11E-15 | 4.33E-14 | 3.84E-14 | 4.94E-03 | 1.20E-01 | 7.25E-01 |

|           |        |       |       |       |       |           |          |          |          |          |          |          |
|-----------|--------|-------|-------|-------|-------|-----------|----------|----------|----------|----------|----------|----------|
| 583.4736  | 238.7  | 19.41 | 19.88 | 20.05 | 19.73 | 2.47E-04  | 9.71E-03 | 1.15E-04 | 1.64E-01 | 6.65E-01 | 7.64E-01 | 1.58E-01 |
| 583.8188  | 44.44  | 15.56 | 16.70 | 15.75 | 16.02 | 1.11E-05  | 7.05E-06 | 8.40E-01 | 1.99E-01 | 3.50E-04 | 2.74E-02 | 6.55E-01 |
| 583.85166 | 47.08  | 14.51 | 16.57 | 16.76 | 16.66 | 1.81E-24  | 4.50E-14 | 3.90E-14 | 4.26E-14 | 8.28E-01 | 9.78E-01 | 9.73E-01 |
| 583.90042 | 62.82  | 15.35 | 11.62 | 16.25 | 16.35 | 2.59E-59  | 5.11E-15 | 3.27E-04 | 9.72E-05 | 5.11E-15 | 5.11E-15 | 9.73E-01 |
| 583.96013 | 63.2   | 11.00 | 15.55 | 10.74 | 11.71 | 2.93E-57  | 5.11E-15 | 6.78E-01 | 1.68E-02 | 5.11E-15 | 5.11E-15 | 5.34E-04 |
| 584.23999 | 184.44 | 16.78 | 17.33 | 17.68 | 16.77 | 3.83E-09  | 2.91E-03 | 9.53E-08 | 1.00E+00 | 1.14E-01 | 4.45E-03 | 3.45E-07 |
| 584.26079 | 44.15  | 13.52 | 12.54 | 12.89 | 13.08 | 2.06E-01  | 1.49E-01 | 5.18E-01 | 7.95E-01 | 8.77E-01 | 6.77E-01 | 9.78E-01 |
| 584.35787 | 226.38 | 20.83 | 16.56 | 14.96 | 17.12 | 2.48E-46  | 5.11E-15 | 5.11E-15 | 1.80E-14 | 8.76E-06 | 3.44E-01 | 3.03E-09 |
| 584.38452 | 233.51 | 16.76 | 19.61 | 18.32 | 19.18 | 3.56E-14  | 1.74E-13 | 5.92E-05 | 6.21E-10 | 1.95E-03 | 6.54E-01 | 8.42E-02 |
| 584.47715 | 239.16 | 17.59 | 18.36 | 18.55 | 18.34 | 2.94E-08  | 1.88E-05 | 4.89E-08 | 5.99E-05 | 6.68E-01 | 9.99E-01 | 5.97E-01 |
| 584.76317 | 66.99  | 15.09 | 11.63 | 15.30 | 14.94 | 1.23E-22  | 4.43E-14 | 9.35E-01 | 9.76E-01 | 4.12E-14 | 4.36E-14 | 7.69E-01 |
| 584.7861  | 53.55  | 19.31 | 18.80 | 19.61 | 19.26 | 1.21E-13  | 7.68E-07 | 5.15E-03 | 9.56E-01 | 5.12E-14 | 3.03E-05 | 1.65E-03 |
| 584.80683 | 44.14  | 20.21 | 22.00 | 22.30 | 22.06 | 1.27E-42  | 5.11E-15 | 5.11E-15 | 5.11E-15 | 1.08E-01 | 9.70E-01 | 2.92E-01 |
| 584.82538 | 46.07  | 15.31 | 14.90 | 14.46 | 15.20 | 9.57E-03  | 4.33E-01 | 7.85E-03 | 9.79E-01 | 3.53E-01 | 7.21E-01 | 4.07E-02 |
| 584.84572 | 44.95  | 16.92 | 18.45 | 18.46 | 18.60 | 4.05E-34  | 7.33E-15 | 6.22E-15 | 5.11E-15 | 1.00E+00 | 6.74E-01 | 7.07E-01 |
| 584.95082 | 54.58  | 12.74 | 16.26 | 10.74 | 11.41 | 1.45E-144 | 5.11E-15 | 5.11E-15 | 5.11E-15 | 5.11E-15 | 5.11E-15 | 1.50E-11 |
| 584.97164 | 47.9   | 9.46  | 12.46 | 11.54 | 10.25 | 1.06E-06  | 1.18E-06 | 1.25E-03 | 5.17E-01 | 3.71E-01 | 1.26E-03 | 1.24E-01 |
| 585.07784 | 22.91  | 12.56 | 15.68 | 14.31 | 13.70 | 4.65E-11  | 6.20E-12 | 1.64E-04 | 3.78E-02 | 6.96E-03 | 5.15E-05 | 4.95E-01 |
| 585.24369 | 195.26 | 13.60 | 13.61 | 14.95 | 13.25 | 1.69E-05  | 1.00E+00 | 6.18E-04 | 7.51E-01 | 1.06E-03 | 7.51E-01 | 2.55E-05 |
| 585.30503 | 172.27 | 15.60 | 14.64 | 16.29 | 14.93 | 2.38E-12  | 8.31E-05 | 6.88E-03 | 1.42E-02 | 8.11E-12 | 5.92E-01 | 3.28E-08 |
| 585.33176 | 200.28 | 14.33 | 11.50 | 13.67 | 11.74 | 3.54E-16  | 4.64E-13 | 2.43E-01 | 8.48E-11 | 4.22E-08 | 9.16E-01 | 2.42E-06 |
| 585.34365 | 199.93 | 14.96 | 20.48 | 14.04 | 17.21 | 5.69E-22  | 4.42E-14 | 4.05E-01 | 1.65E-03 | 3.70E-14 | 2.85E-06 | 4.62E-06 |
| 585.36142 | 205.29 | 18.43 | 16.24 | 16.56 | 16.53 | 1.10E-18  | 4.31E-14 | 6.44E-13 | 1.95E-12 | 5.53E-01 | 6.35E-01 | 1.00E+00 |
| 585.38686 | 215.3  | 10.94 | 12.77 | 14.43 | 13.33 | 1.87E-07  | 1.07E-02 | 4.34E-08 | 5.51E-04 | 3.00E-02 | 8.04E-01 | 2.75E-01 |
| 585.4878  | 259.1  | 19.50 | 18.61 | 18.99 | 19.65 | 1.35E-13  | 4.96E-10 | 7.10E-04 | 6.76E-01 | 2.14E-02 | 6.35E-12 | 1.72E-05 |
| 585.51098 | 255.85 | 18.42 | 18.76 | 18.85 | 18.60 | 1.82E-01  | 3.61E-01 | 1.59E-01 | 8.27E-01 | 9.74E-01 | 8.91E-01 | 6.66E-01 |
| 585.79265 | 44.5   | 14.40 | 13.60 | 13.51 | 14.00 | 2.16E-11  | 1.57E-08 | 2.01E-10 | 1.48E-02 | 8.99E-01 | 1.85E-02 | 1.85E-03 |
| 585.81023 | 50.92  | 16.07 | 18.18 | 18.59 | 18.32 | 1.13E-43  | 5.11E-15 | 5.11E-15 | 5.11E-15 | 5.20E-02 | 8.36E-01 | 3.45E-01 |
| 585.82317 | 40.23  | 13.76 | 13.51 | 13.39 | 13.96 | 2.33E-02  | 5.68E-01 | 2.09E-01 | 7.21E-01 | 9.23E-01 | 1.14E-01 | 2.26E-02 |
| 585.88825 | 42.86  | 15.55 | 16.64 | 16.60 | 16.03 | 1.76E-11  | 9.71E-10 | 2.35E-09 | 2.14E-02 | 9.97E-01 | 2.71E-03 | 4.98E-03 |
| 585.9685  | 48.74  | 12.50 | 14.98 | 15.55 | 13.56 | 3.89E-20  | 4.25E-13 | 4.15E-14 | 5.71E-03 | 2.85E-01 | 1.13E-04 | 2.25E-08 |
| 585.99651 | 18.06  | 11.03 | 12.68 | 11.96 | 12.32 | 1.09E-05  | 6.37E-06 | 2.41E-02 | 9.89E-04 | 1.42E-01 | 7.26E-01 | 7.24E-01 |
| 586.06449 | 22.12  | 15.35 | 13.72 | 14.08 | 14.13 | 9.92E-04  | 8.33E-04 | 1.45E-02 | 2.74E-02 | 8.31E-01 | 7.88E-01 | 1.00E+00 |
| 586.31573 | 194.04 | 20.96 | 21.14 | 21.10 | 20.75 | 1.04E-02  | 3.90E-01 | 6.28E-01 | 3.36E-01 | 9.80E-01 | 1.04E-02 | 2.94E-02 |
| 586.49186 | 258.5  | 16.81 | 15.38 | 16.71 | 17.47 | 5.84E-12  | 3.80E-07 | 9.80E-01 | 5.92E-02 | 4.11E-06 | 1.91E-12 | 2.52E-02 |
| 586.51427 | 255.47 | 15.69 | 16.98 | 16.80 | 16.37 | 1.18E-04  | 1.46E-04 | 1.28E-03 | 1.21E-01 | 9.38E-01 | 2.22E-01 | 5.18E-01 |
| 586.72294 | 74.51  | 13.47 | 10.87 | 12.68 | 12.30 | 1.72E-15  | 4.12E-14 | 2.67E-02 | 4.44E-04 | 1.18E-08 | 1.85E-05 | 5.75E-01 |
| 586.74421 | 56.98  | 21.28 | 21.62 | 22.44 | 22.16 | 4.53E-33  | 3.64E-04 | 5.11E-15 | 4.15E-14 | 4.25E-14 | 3.98E-08 | 1.01E-02 |
| 586.76395 | 60.06  | 15.39 | 13.51 | 15.76 | 15.43 | 6.60E-20  | 8.30E-14 | 3.40E-01 | 9.98E-01 | 4.23E-14 | 2.50E-13 | 4.95E-01 |
| 586.78341 | 48.97  | 17.53 | 16.30 | 17.71 | 17.65 | 4.19E-38  | 5.11E-15 | 2.13E-01 | 6.22E-01 | 5.11E-15 | 5.11E-15 | 9.14E-01 |
| 586.80553 | 49.01  | 18.38 | 20.07 | 20.44 | 20.22 | 2.62E-42  | 5.11E-15 | 5.11E-15 | 5.11E-15 | 2.96E-02 | 6.70E-01 | 3.96E-01 |
| 586.91492 | 36.49  | 13.63 | 15.01 | 14.93 | 15.01 | 8.08E-06  | 9.27E-05 | 2.29E-04 | 1.50E-04 | 9.94E-01 | 1.00E+00 | 9.95E-01 |
| 587.08285 | 19.48  | 12.29 | 16.91 | 16.32 | 15.24 | 1.84E-55  | 5.11E-15 | 5.11E-15 | 5.33E-15 | 5.68E-02 | 1.76E-10 | 4.40E-05 |
| 587.19195 | 64.32  | 12.39 | 13.96 | 10.40 | 11.05 | 1.40E-89  | 5.11E-15 | 5.11E-15 | 5.77E-15 | 5.11E-15 | 5.11E-15 | 8.82E-08 |
| 587.31917 | 190.49 | 19.25 | 19.36 | 19.35 | 18.97 | 1.12E-02  | 8.06E-01 | 8.60E-01 | 1.16E-01 | 9.99E-01 | 1.45E-02 | 1.88E-02 |

|           |        |       |       |       |       |           |          |          |          |          |          |          |
|-----------|--------|-------|-------|-------|-------|-----------|----------|----------|----------|----------|----------|----------|
| 587.37453 | 261.09 | 13.57 | 13.40 | 13.75 | 13.03 | 3.84E-01  | 9.74E-01 | 9.71E-01 | 5.62E-01 | 8.33E-01 | 8.22E-01 | 3.27E-01 |
| 587.50487 | 261.88 | 18.87 | 18.30 | 18.47 | 18.50 | 2.86E-03  | 1.51E-03 | 4.38E-02 | 9.14E-02 | 7.09E-01 | 6.07E-01 | 9.97E-01 |
| 587.74757 | 56.47  | 17.35 | 17.36 | 18.63 | 18.30 | 3.04E-30  | 1.00E+00 | 1.29E-14 | 1.07E-13 | 2.18E-14 | 3.73E-13 | 2.61E-02 |
| 587.80893 | 49.99  | 13.57 | 15.57 | 15.93 | 15.68 | 6.76E-25  | 4.37E-14 | 2.71E-14 | 4.13E-14 | 3.59E-01 | 9.70E-01 | 6.61E-01 |
| 587.90676 | 55.22  | 12.19 | 14.39 | 15.95 | 15.07 | 2.07E-20  | 2.69E-08 | 3.69E-14 | 1.50E-12 | 1.89E-04 | 2.77E-01 | 9.52E-02 |
| 588.0764  | 17.08  | 17.80 | 19.30 | 19.35 | 19.13 | 2.90E-38  | 5.11E-15 | 5.11E-15 | 7.77E-15 | 9.77E-01 | 4.58E-01 | 2.41E-01 |
| 588.31846 | 200.26 | 15.12 | 13.95 | 13.43 | 14.22 | 9.62E-05  | 8.66E-03 | 3.33E-05 | 7.87E-02 | 5.09E-01 | 9.02E-01 | 1.74E-01 |
| 588.33138 | 209.59 | 24.78 | 25.39 | 25.34 | 25.11 | 7.52E-06  | 2.12E-05 | 7.84E-05 | 5.91E-02 | 9.87E-01 | 1.72E-01 | 3.04E-01 |
| 588.50874 | 260.96 | 16.77 | 15.62 | 16.31 | 16.08 | 1.39E-04  | 4.05E-05 | 2.56E-01 | 3.95E-02 | 3.47E-02 | 2.94E-01 | 8.15E-01 |
| 588.70247 | 75.95  | 13.54 | 12.54 | 14.82 | 13.86 | 7.44E-11  | 4.71E-03 | 1.18E-04 | 7.22E-01 | 7.14E-12 | 2.05E-04 | 1.16E-02 |
| 588.72152 | 70.25  | 14.41 | 12.35 | 13.21 | 12.99 | 1.25E-24  | 7.33E-15 | 1.04E-10 | 2.74E-13 | 8.92E-06 | 2.46E-03 | 6.12E-01 |
| 588.74246 | 57.03  | 20.03 | 20.29 | 21.14 | 20.88 | 6.00E-30  | 2.04E-02 | 5.33E-15 | 4.40E-14 | 4.37E-14 | 6.18E-09 | 3.36E-02 |
| 588.76057 | 54.7   | 16.56 | 16.76 | 17.74 | 17.39 | 1.74E-33  | 1.02E-01 | 5.11E-15 | 4.46E-14 | 2.73E-14 | 5.35E-10 | 9.05E-04 |
| 588.77955 | 46.47  | 13.75 | 10.43 | 12.28 | 12.69 | 6.73E-28  | 5.11E-15 | 5.40E-08 | 2.60E-04 | 4.43E-11 | 5.48E-14 | 3.94E-01 |
| 588.80056 | 50.83  | 15.70 | 15.38 | 16.17 | 16.07 | 1.68E-05  | 2.08E-01 | 2.44E-02 | 1.40E-01 | 2.89E-05 | 6.09E-04 | 9.35E-01 |
| 588.87765 | 41.61  | 15.93 | 17.70 | 17.27 | 17.58 | 1.65E-12  | 3.61E-11 | 5.07E-07 | 1.64E-09 | 3.01E-01 | 9.68E-01 | 6.00E-01 |
| 588.89837 | 40.83  | 13.91 | 16.25 | 15.95 | 15.75 | 2.27E-08  | 9.74E-08 | 3.20E-06 | 6.41E-05 | 8.83E-01 | 6.40E-01 | 9.65E-01 |
| 588.98872 | 16.9   | 10.40 | 16.45 | 15.26 | 12.69 | 2.18E-39  | 5.11E-15 | 5.33E-15 | 1.38E-07 | 1.46E-02 | 4.29E-14 | 7.38E-09 |
| 589.01948 | 20.21  | 11.87 | 16.72 | 16.79 | 16.01 | 5.88E-58  | 5.11E-15 | 5.11E-15 | 5.11E-15 | 9.92E-01 | 3.95E-02 | 1.71E-02 |
| 589.08427 | 18.22  | 15.72 | 17.30 | 17.10 | 17.04 | 4.27E-25  | 2.49E-14 | 4.45E-14 | 4.27E-14 | 4.84E-01 | 2.95E-01 | 9.81E-01 |
| 589.1698  | 56.75  | 11.65 | 20.91 | 9.77  | 10.33 | 9.69E-144 | 5.11E-15 | 4.15E-14 | 2.38E-10 | 5.11E-15 | 5.11E-15 | 2.09E-02 |
| 589.21707 | 170.94 | 12.89 | 13.36 | 14.44 | 13.34 | 3.06E-05  | 4.44E-01 | 1.01E-05 | 5.02E-01 | 5.90E-03 | 1.00E+00 | 6.43E-03 |
| 589.3348  | 205.86 | 23.16 | 23.65 | 23.54 | 23.37 | 1.25E-03  | 9.96E-04 | 1.56E-02 | 4.05E-01 | 8.42E-01 | 1.55E-01 | 5.53E-01 |
| 589.5199  | 274.64 | 19.59 | 18.98 | 19.51 | 19.68 | 1.85E-02  | 4.35E-02 | 9.89E-01 | 9.79E-01 | 1.05E-01 | 2.19E-02 | 9.03E-01 |
| 589.74573 | 58.01  | 15.73 | 14.97 | 16.85 | 16.55 | 1.09E-31  | 5.34E-07 | 1.57E-13 | 1.24E-07 | 5.11E-15 | 3.04E-14 | 1.67E-01 |
| 589.75977 | 57.09  | 13.80 | 14.05 | 15.44 | 14.85 | 4.51E-14  | 6.00E-01 | 4.66E-13 | 9.19E-06 | 2.42E-09 | 2.01E-03 | 3.42E-02 |
| 589.84354 | 39.05  | 11.94 | 13.30 | 12.74 | 13.11 | 2.82E-03  | 2.60E-03 | 1.58E-01 | 1.68E-02 | 4.70E-01 | 9.65E-01 | 7.84E-01 |
| 589.90205 | 43.07  | 11.10 | 10.39 | 12.33 | 12.18 | 3.57E-07  | 2.09E-01 | 3.97E-03 | 2.20E-02 | 2.17E-06 | 3.21E-05 | 9.76E-01 |
| 589.92153 | 50.22  | 12.05 | 12.50 | 13.03 | 13.17 | 3.83E-07  | 1.35E-01 | 1.84E-05 | 1.96E-06 | 5.96E-02 | 1.30E-02 | 9.21E-01 |
| 590.02567 | 30.02  | 12.09 | 12.94 | 12.92 | 12.41 | 3.58E-02  | 6.14E-02 | 6.86E-02 | 7.98E-01 | 1.00E+00 | 4.46E-01 | 4.77E-01 |
| 590.17361 | 65.15  | 9.61  | 18.55 | 8.69  | 9.53  | 2.00E-120 | 5.11E-15 | 1.76E-04 | 9.84E-01 | 5.11E-15 | 5.11E-15 | 1.62E-03 |
| 590.25072 | 148.07 | 18.42 | 16.31 | 17.40 | 17.42 | 1.79E-34  | 5.11E-15 | 4.95E-12 | 4.07E-11 | 8.63E-13 | 2.45E-12 | 1.00E+00 |
| 590.34275 | 223.05 | 22.02 | 22.18 | 21.79 | 21.84 | 4.77E-02  | 6.96E-01 | 3.96E-01 | 6.43E-01 | 4.91E-02 | 1.33E-01 | 9.87E-01 |
| 590.52368 | 272.01 | 17.70 | 16.77 | 17.60 | 17.94 | 1.21E-03  | 8.70E-03 | 9.83E-01 | 8.56E-01 | 3.06E-02 | 1.06E-03 | 6.72E-01 |
| 590.70182 | 71.56  | 12.66 | 10.28 | 11.73 | 11.92 | 4.11E-20  | 3.26E-14 | 1.88E-04 | 6.74E-03 | 4.42E-09 | 1.51E-10 | 8.50E-01 |
| 590.74037 | 57.42  | 16.91 | 16.86 | 18.21 | 17.86 | 3.67E-21  | 9.82E-01 | 4.31E-14 | 6.97E-09 | 4.42E-14 | 2.56E-09 | 1.01E-01 |
| 590.75649 | 47.56  | 16.39 | 15.63 | 17.36 | 17.16 | 1.31E-26  | 1.44E-06 | 7.41E-10 | 2.55E-06 | 1.02E-14 | 4.25E-14 | 5.72E-01 |
| 590.7726  | 45.26  | 16.56 | 17.34 | 17.16 | 17.53 | 1.87E-06  | 1.38E-04 | 4.62E-03 | 2.09E-06 | 7.80E-01 | 7.41E-01 | 2.12E-01 |
| 590.83593 | 43.42  | 19.60 | 22.00 | 21.74 | 21.69 | 3.81E-34  | 5.11E-15 | 7.11E-15 | 1.64E-14 | 4.89E-01 | 3.59E-01 | 9.93E-01 |
| 591.16867 | 65.38  | 14.25 | 15.20 | 12.65 | 13.19 | 3.88E-85  | 9.10E-15 | 5.11E-15 | 5.11E-15 | 5.11E-15 | 5.11E-15 | 5.15E-09 |
| 591.23483 | 151.38 | 16.32 | 17.10 | 17.86 | 17.06 | 1.21E-24  | 1.52E-08 | 5.77E-15 | 1.57E-07 | 5.33E-08 | 9.93E-01 | 2.64E-08 |
| 591.25435 | 146.1  | 16.54 | 12.69 | 13.15 | 14.87 | 1.82E-54  | 5.11E-15 | 5.11E-15 | 8.90E-14 | 1.01E-01 | 3.71E-14 | 7.31E-14 |
| 591.29234 | 166.89 | 15.18 | 11.69 | 12.99 | 13.05 | 8.01E-30  | 5.11E-15 | 4.69E-14 | 1.46E-13 | 5.10E-06 | 4.45E-06 | 9.97E-01 |
| 591.34577 | 219.78 | 19.96 | 19.60 | 18.90 | 19.26 | 1.51E-06  | 2.59E-01 | 6.37E-07 | 3.42E-03 | 2.75E-03 | 3.58E-01 | 2.78E-01 |
| 591.76438 | 55.94  | 13.45 | 13.20 | 14.43 | 13.75 | 4.56E-04  | 8.24E-01 | 4.86E-03 | 7.65E-01 | 3.13E-04 | 2.94E-01 | 1.16E-01 |

|           |        |       |       |       |       |          |          |          |          |          |          |          |
|-----------|--------|-------|-------|-------|-------|----------|----------|----------|----------|----------|----------|----------|
| 591.80492 | 45.1   | 13.17 | 17.08 | 16.43 | 16.43 | 1.44E-36 | 5.11E-15 | 6.22E-15 | 9.55E-15 | 9.01E-02 | 1.09E-01 | 1.00E+00 |
| 591.84111 | 42.64  | 15.16 | 18.24 | 17.95 | 17.93 | 3.08E-30 | 6.22E-15 | 2.26E-14 | 3.51E-14 | 6.85E-01 | 6.53E-01 | 1.00E+00 |
| 591.97377 | 23.35  | 15.67 | 16.47 | 17.12 | 16.65 | 2.53E-06 | 1.54E-02 | 6.22E-07 | 2.33E-03 | 8.15E-02 | 9.20E-01 | 3.30E-01 |
| 592.2384  | 151.62 | 12.79 | 13.40 | 15.29 | 13.99 | 2.78E-15 | 1.37E-01 | 4.41E-14 | 2.89E-04 | 2.24E-09 | 2.00E-01 | 9.57E-05 |
| 592.26651 | 178.55 | 18.31 | 17.42 | 18.20 | 17.14 | 6.16E-08 | 2.57E-04 | 9.48E-01 | 1.64E-06 | 2.57E-03 | 6.22E-01 | 2.85E-05 |
| 592.29828 | 180.29 | 13.62 | 11.37 | 11.21 | 10.25 | 2.29E-13 | 4.78E-07 | 4.73E-08 | 2.87E-13 | 9.81E-01 | 4.80E-02 | 1.13E-01 |
| 592.32598 | 178.36 | 11.63 | 13.51 | 14.67 | 11.58 | 2.42E-14 | 4.10E-05 | 6.99E-12 | 9.99E-01 | 2.72E-02 | 7.00E-05 | 3.84E-11 |
| 592.3643  | 286.57 | 18.64 | 17.12 | 17.14 | 17.08 | 4.49E-08 | 3.11E-06 | 3.27E-06 | 2.88E-06 | 1.00E+00 | 9.99E-01 | 9.97E-01 |
| 592.68933 | 54.39  | 13.74 | 9.79  | 12.38 | 13.03 | 1.97E-35 | 5.11E-15 | 1.99E-06 | 4.29E-02 | 4.11E-14 | 9.99E-15 | 8.21E-02 |
| 592.73507 | 62.84  | 13.82 | 10.70 | 13.23 | 12.92 | 3.33E-28 | 5.11E-15 | 7.40E-02 | 2.09E-03 | 4.25E-14 | 4.95E-14 | 6.00E-01 |
| 592.75247 | 61.82  | 15.33 | 12.63 | 14.47 | 14.90 | 3.34E-31 | 5.11E-15 | 8.97E-05 | 1.43E-01 | 4.20E-14 | 2.84E-14 | 1.61E-01 |
| 592.77313 | 45.58  | 18.37 | 18.47 | 17.53 | 17.84 | 1.29E-07 | 9.44E-01 | 9.03E-06 | 1.59E-02 | 1.33E-06 | 3.76E-03 | 3.06E-01 |
| 592.80539 | 51.65  | 10.84 | 15.31 | 14.28 | 14.79 | 5.98E-15 | 1.72E-13 | 6.55E-09 | 1.36E-10 | 2.56E-01 | 8.02E-01 | 8.13E-01 |
| 592.83304 | 44.59  | 17.61 | 19.35 | 19.11 | 19.14 | 8.74E-28 | 1.02E-14 | 4.22E-14 | 4.20E-14 | 3.90E-01 | 5.28E-01 | 9.98E-01 |
| 592.86631 | 285.89 | 18.42 | 17.05 | 17.01 | 17.25 | 2.15E-07 | 4.96E-06 | 1.97E-06 | 1.94E-04 | 9.99E-01 | 9.02E-01 | 8.40E-01 |
| 593.09194 | 18.93  | 10.99 | 12.52 | 13.30 | 11.41 | 1.05E-04 | 2.58E-02 | 1.29E-04 | 8.76E-01 | 4.79E-01 | 2.09E-01 | 4.90E-03 |
| 593.22999 | 155.38 | 12.27 | 12.46 | 14.56 | 13.47 | 1.05E-13 | 9.19E-01 | 1.29E-12 | 5.56E-04 | 2.17E-10 | 7.08E-03 | 2.97E-03 |
| 593.25065 | 166.15 | 16.15 | 16.30 | 16.84 | 16.18 | 3.39E-06 | 7.22E-01 | 8.25E-06 | 9.98E-01 | 1.10E-03 | 8.48E-01 | 5.95E-05 |
| 593.27011 | 183.21 | 16.16 | 15.93 | 16.58 | 16.01 | 1.20E-03 | 5.16E-01 | 6.27E-02 | 8.08E-01 | 1.17E-03 | 9.73E-01 | 7.36E-03 |
| 593.30781 | 173.9  | 15.08 | 12.58 | 14.35 | 12.09 | 3.58E-17 | 3.11E-11 | 1.42E-01 | 6.47E-14 | 4.99E-06 | 5.40E-01 | 9.84E-09 |
| 593.37095 | 287.52 | 17.58 | 16.11 | 16.04 | 16.11 | 4.06E-09 | 7.03E-07 | 1.44E-07 | 1.58E-06 | 9.94E-01 | 1.00E+00 | 9.93E-01 |
| 593.77889 | 48.58  | 12.86 | 13.12 | 13.19 | 13.32 | 3.21E-01 | 7.16E-01 | 5.41E-01 | 2.71E-01 | 9.94E-01 | 8.72E-01 | 9.56E-01 |
| 593.81021 | 44.51  | 12.12 | 13.85 | 13.56 | 13.85 | 3.43E-16 | 2.54E-13 | 4.43E-10 | 7.87E-13 | 5.62E-01 | 1.00E+00 | 5.80E-01 |
| 593.83687 | 46.18  | 11.50 | 13.01 | 12.82 | 12.81 | 7.48E-06 | 2.58E-05 | 2.70E-04 | 5.35E-04 | 9.37E-01 | 9.34E-01 | 1.00E+00 |
| 593.87287 | 40.61  | 13.27 | 11.53 | 11.06 | 11.77 | 8.03E-04 | 1.18E-02 | 5.51E-04 | 4.86E-02 | 8.43E-01 | 9.77E-01 | 6.19E-01 |
| 594.25388 | 166.5  | 13.37 | 12.99 | 14.23 | 13.24 | 4.18E-05 | 4.77E-01 | 4.95E-03 | 9.65E-01 | 3.00E-05 | 8.03E-01 | 1.84E-03 |
| 594.28233 | 184.34 | 17.23 | 16.16 | 16.37 | 15.92 | 4.16E-12 | 1.64E-08 | 4.70E-06 | 1.53E-11 | 6.64E-01 | 5.40E-01 | 6.87E-02 |
| 594.30424 | 185.85 | 15.71 | 13.32 | 14.59 | 13.25 | 1.11E-19 | 4.27E-14 | 1.64E-04 | 4.46E-14 | 2.35E-05 | 9.94E-01 | 1.20E-05 |
| 594.34186 | 183.54 | 15.73 | 16.70 | 17.26 | 15.62 | 4.03E-05 | 5.36E-02 | 3.58E-04 | 9.93E-01 | 4.66E-01 | 3.76E-02 | 2.88E-04 |
| 594.37802 | 209.95 | 18.02 | 16.59 | 16.14 | 17.33 | 6.39E-19 | 1.82E-11 | 4.32E-14 | 3.79E-03 | 1.05E-01 | 1.82E-03 | 7.56E-08 |
| 594.68745 | 63     | 13.56 | 10.26 | 12.71 | 13.05 | 6.97E-29 | 5.11E-15 | 4.92E-03 | 2.07E-01 | 4.36E-14 | 3.94E-14 | 5.84E-01 |
| 594.71065 | 64.85  | 16.49 | 16.79 | 17.37 | 16.89 | 5.06E-11 | 5.33E-02 | 5.36E-12 | 6.80E-03 | 1.33E-05 | 8.76E-01 | 5.35E-04 |
| 594.77076 | 63.22  | 15.89 | 13.94 | 15.32 | 15.37 | 3.12E-19 | 4.09E-14 | 1.30E-02 | 4.07E-02 | 9.12E-11 | 6.76E-11 | 9.92E-01 |
| 594.78959 | 41.18  | 19.72 | 20.95 | 20.77 | 20.56 | 6.66E-25 | 1.60E-14 | 4.33E-14 | 4.42E-12 | 3.25E-01 | 4.03E-03 | 2.78E-01 |
| 594.82215 | 41.04  | 14.09 | 13.25 | 13.40 | 13.76 | 1.02E-01 | 9.89E-02 | 2.25E-01 | 8.07E-01 | 9.77E-01 | 5.52E-01 | 7.86E-01 |
| 594.84706 | 43.47  | 15.45 | 18.44 | 18.47 | 18.50 | 4.23E-34 | 5.77E-15 | 5.33E-15 | 6.00E-15 | 1.00E+00 | 9.95E-01 | 9.99E-01 |
| 594.96384 | 157.39 | 14.25 | 14.22 | 14.93 | 14.66 | 2.01E-05 | 9.96E-01 | 1.72E-04 | 7.13E-02 | 1.15E-04 | 4.91E-02 | 3.59E-01 |
| 595.15768 | 56.67  | 17.51 | 19.22 | 17.02 | 17.09 | 1.13E-91 | 5.11E-15 | 1.45E-11 | 3.12E-08 | 5.11E-15 | 5.11E-15 | 7.09E-01 |
| 595.26636 | 178.57 | 13.02 | 13.76 | 14.58 | 13.27 | 5.60E-07 | 4.46E-02 | 4.00E-07 | 8.21E-01 | 2.47E-02 | 3.53E-01 | 8.33E-05 |
| 595.28911 | 139.24 | 18.58 | 18.63 | 19.05 | 18.63 | 9.85E-02 | 9.95E-01 | 1.07E-01 | 9.95E-01 | 2.00E-01 | 1.00E+00 | 2.22E-01 |
| 595.32224 | 181.05 | 16.43 | 13.62 | 14.66 | 12.41 | 3.51E-12 | 4.38E-07 | 2.64E-03 | 1.85E-12 | 1.86E-01 | 1.07E-01 | 1.78E-04 |
| 595.34515 | 172.96 | 12.06 | 14.29 | 14.84 | 13.65 | 4.72E-09 | 3.73E-06 | 3.94E-09 | 2.42E-03 | 6.00E-01 | 5.08E-01 | 4.70E-02 |
| 595.38779 | 196.25 | 17.92 | 17.31 | 16.77 | 15.98 | 3.01E-14 | 3.11E-02 | 2.00E-06 | 5.40E-14 | 8.01E-02 | 2.05E-07 | 4.00E-03 |
| 595.53121 | 268.44 | 17.60 | 15.45 | 15.76 | 16.44 | 3.63E-10 | 1.05E-09 | 1.42E-07 | 2.94E-03 | 7.84E-01 | 1.97E-02 | 1.78E-01 |
| 595.79201 | 50.04  | 15.26 | 16.41 | 16.02 | 15.82 | 3.01E-12 | 5.78E-13 | 1.69E-06 | 1.35E-03 | 4.15E-02 | 6.95E-04 | 5.31E-01 |



|           |        |       |       |       |       |           |          |          |          |          |          |          |
|-----------|--------|-------|-------|-------|-------|-----------|----------|----------|----------|----------|----------|----------|
| 595.82794 | 40.6   | 16.39 | 16.45 | 16.34 | 16.02 | 9.70E-02  | 9.89E-01 | 9.91E-01 | 1.57E-01 | 9.32E-01 | 9.16E-02 | 2.87E-01 |
| 596.09219 | 19.99  | 13.39 | 16.95 | 17.12 | 15.75 | 1.16E-40  | 5.11E-15 | 5.11E-15 | 4.26E-14 | 9.04E-01 | 2.87E-05 | 1.08E-06 |
| 596.15953 | 65.07  | 14.18 | 15.16 | 12.53 | 13.08 | 1.22E-70  | 4.29E-14 | 5.11E-15 | 3.71E-14 | 5.11E-15 | 5.11E-15 | 1.40E-06 |
| 596.26303 | 196.37 | 15.49 | 16.10 | 16.07 | 14.86 | 3.75E-09  | 1.12E-02 | 1.73E-02 | 1.11E-02 | 9.98E-01 | 5.29E-08 | 9.48E-08 |
| 596.29533 | 151.53 | 17.51 | 15.26 | 16.42 | 16.61 | 4.05E-17  | 4.33E-14 | 1.52E-05 | 9.08E-04 | 6.86E-06 | 3.17E-07 | 8.53E-01 |
| 596.32549 | 183.33 | 15.26 | 13.48 | 14.89 | 11.02 | 5.61E-17  | 7.71E-04 | 8.55E-01 | 4.23E-14 | 1.43E-02 | 3.96E-06 | 2.42E-13 |
| 596.35678 | 207    | 15.19 | 12.60 | 12.12 | 12.06 | 1.02E-11  | 3.56E-07 | 9.70E-10 | 1.73E-09 | 7.41E-01 | 6.85E-01 | 9.99E-01 |
| 596.39231 | 195.49 | 17.00 | 16.52 | 16.47 | 16.15 | 2.68E-03  | 1.27E-01 | 7.10E-02 | 1.10E-03 | 9.96E-01 | 3.77E-01 | 5.01E-01 |
| 596.66976 | 87.88  | 8.50  | 11.00 | 11.27 | 9.47  | 3.27E-07  | 2.41E-05 | 1.93E-06 | 2.82E-01 | 9.62E-01 | 3.33E-02 | 7.55E-03 |
| 596.70889 | 76.11  | 15.21 | 14.94 | 15.22 | 15.01 | 1.50E-01  | 2.57E-01 | 1.00E+00 | 5.16E-01 | 2.42E-01 | 9.77E-01 | 4.89E-01 |
| 596.72645 | 60.87  | 16.91 | 16.81 | 17.97 | 17.45 | 7.71E-24  | 7.63E-01 | 4.46E-14 | 8.02E-06 | 3.60E-14 | 1.69E-07 | 4.41E-05 |
| 596.78515 | 43.47  | 18.33 | 19.13 | 19.18 | 18.89 | 1.08E-21  | 4.17E-14 | 4.15E-14 | 6.47E-09 | 9.34E-01 | 2.92E-02 | 4.54E-03 |
| 596.84342 | 38.51  | 13.81 | 12.86 | 12.84 | 13.77 | 2.40E-04  | 6.20E-03 | 4.18E-03 | 9.99E-01 | 1.00E+00 | 1.56E-02 | 1.12E-02 |
| 596.86455 | 44.26  | 17.61 | 18.12 | 18.04 | 18.39 | 2.97E-04  | 1.94E-02 | 6.27E-02 | 1.11E-04 | 9.70E-01 | 4.55E-01 | 2.22E-01 |
| 596.88477 | 42.86  | 13.48 | 16.51 | 16.64 | 16.21 | 6.82E-30  | 1.51E-14 | 6.88E-15 | 4.13E-14 | 9.58E-01 | 7.01E-01 | 3.90E-01 |
| 596.96911 | 62.94  | 8.59  | 14.70 | 8.36  | 8.59  | 1.11E-108 | 5.11E-15 | 4.86E-01 | 1.00E+00 | 5.11E-15 | 5.11E-15 | 5.32E-01 |
| 597.00825 | 60.31  | 12.29 | 16.59 | 10.28 | 10.95 | 4.04E-105 | 5.11E-15 | 5.11E-15 | 1.00E-13 | 5.11E-15 | 5.11E-15 | 2.93E-04 |
| 597.021   | 199.89 | 12.47 | 11.74 | 11.65 | 12.49 | 1.02E-01  | 3.28E-01 | 2.20E-01 | 1.00E+00 | 9.97E-01 | 3.53E-01 | 2.46E-01 |
| 597.02743 | 25.74  | 17.78 | 19.63 | 19.10 | 18.58 | 2.60E-14  | 5.86E-14 | 2.38E-08 | 2.21E-03 | 7.81E-02 | 4.43E-05 | 1.07E-01 |
| 597.07446 | 19.29  | 11.97 | 16.59 | 16.43 | 15.76 | 1.23E-23  | 3.97E-14 | 4.12E-14 | 1.28E-13 | 9.85E-01 | 2.87E-01 | 4.71E-01 |
| 597.15314 | 65.64  | 13.07 | 13.42 | 11.07 | 11.74 | 4.88E-65  | 4.21E-03 | 5.11E-15 | 5.55E-15 | 5.11E-15 | 5.11E-15 | 1.02E-08 |
| 597.24325 | 150.3  | 15.46 | 12.25 | 12.92 | 13.71 | 1.09E-30  | 5.11E-15 | 3.40E-14 | 6.56E-11 | 2.96E-02 | 1.25E-07 | 9.95E-03 |
| 597.30515 | 161.44 | 20.57 | 19.76 | 20.21 | 20.01 | 1.06E-06  | 3.50E-07 | 6.33E-02 | 1.19E-03 | 1.24E-02 | 3.50E-01 | 5.41E-01 |
| 597.39593 | 192.38 | 14.45 | 15.18 | 14.65 | 14.18 | 3.01E-03  | 2.66E-02 | 8.64E-01 | 7.35E-01 | 1.87E-01 | 1.71E-03 | 3.05E-01 |
| 597.43021 | 239.86 | 17.72 | 16.76 | 17.45 | 17.59 | 3.51E-06  | 2.87E-06 | 4.59E-01 | 9.04E-01 | 1.79E-03 | 1.82E-04 | 8.89E-01 |
| 597.74585 | 58.53  | 14.04 | 13.97 | 15.92 | 15.48 | 1.86E-25  | 9.86E-01 | 4.29E-14 | 1.44E-11 | 4.11E-14 | 6.93E-12 | 1.18E-01 |
| 597.77566 | 55.25  | 13.12 | 12.99 | 13.34 | 13.37 | 4.74E-01  | 9.67E-01 | 8.33E-01 | 7.94E-01 | 5.80E-01 | 5.42E-01 | 1.00E+00 |
| 597.83041 | 41.26  | 13.71 | 12.76 | 11.62 | 12.87 | 1.75E-07  | 3.09E-02 | 2.04E-08 | 8.14E-02 | 6.83E-03 | 9.91E-01 | 3.28E-03 |
| 598.03182 | 18.4   | 13.11 | 14.19 | 13.29 | 13.67 | 1.79E-03  | 1.40E-03 | 9.28E-01 | 2.41E-01 | 1.32E-02 | 3.22E-01 | 5.88E-01 |
| 598.08631 | 17.04  | 10.99 | 14.74 | 13.14 | 14.03 | 5.03E-07  | 3.97E-07 | 7.33E-03 | 9.29E-05 | 9.50E-02 | 7.46E-01 | 5.92E-01 |
| 598.25617 | 195.2  | 12.42 | 12.32 | 12.29 | 11.20 | 1.49E-02  | 9.94E-01 | 9.88E-01 | 1.72E-02 | 1.00E+00 | 4.31E-02 | 4.79E-02 |
| 598.29036 | 217.78 | 16.62 | 11.48 | 11.25 | 12.45 | 2.93E-38  | 5.11E-15 | 5.11E-15 | 2.86E-14 | 9.32E-01 | 6.49E-02 | 1.19E-02 |
| 598.30938 | 162.36 | 18.93 | 17.98 | 18.46 | 18.26 | 5.12E-12  | 1.46E-12 | 7.74E-04 | 1.25E-06 | 7.99E-04 | 1.30E-01 | 3.93E-01 |
| 598.37342 | 199.08 | 16.73 | 13.79 | 14.99 | 14.26 | 5.45E-39  | 5.11E-15 | 4.31E-14 | 5.11E-15 | 9.42E-09 | 7.62E-02 | 1.50E-03 |
| 598.43359 | 246.02 | 14.46 | 12.52 | 13.48 | 13.72 | 1.06E-06  | 1.63E-07 | 1.84E-02 | 1.44E-01 | 2.93E-02 | 4.64E-03 | 8.99E-01 |
| 598.72307 | 70.98  | 15.64 | 14.59 | 16.11 | 15.79 | 1.36E-16  | 3.50E-09 | 1.69E-02 | 7.81E-01 | 4.45E-14 | 1.26E-10 | 2.33E-01 |
| 598.75104 | 58.2   | 13.83 | 14.46 | 16.09 | 15.58 | 7.21E-28  | 4.88E-03 | 6.22E-15 | 4.35E-14 | 5.68E-14 | 2.42E-07 | 4.84E-02 |
| 598.77972 | 39.54  | 15.45 | 15.99 | 16.71 | 16.02 | 5.49E-12  | 4.38E-03 | 3.62E-13 | 3.23E-03 | 7.15E-05 | 9.98E-01 | 2.31E-04 |
| 598.80207 | 46.08  | 16.00 | 14.15 | 14.67 | 15.17 | 5.99E-12  | 3.16E-12 | 3.93E-07 | 5.22E-03 | 1.58E-01 | 4.61E-04 | 1.87E-01 |
| 598.82262 | 50.04  | 19.23 | 20.19 | 20.57 | 20.48 | 2.75E-30  | 4.24E-14 | 5.33E-15 | 1.60E-14 | 3.19E-03 | 5.35E-02 | 8.42E-01 |
| 598.8615  | 46.12  | 13.73 | 13.57 | 13.46 | 14.08 | 4.62E-01  | 9.76E-01 | 8.95E-01 | 8.14E-01 | 9.92E-01 | 5.95E-01 | 4.19E-01 |
| 598.92417 | 166.28 | 7.56  | 10.99 | 11.64 | 14.39 | 2.27E-36  | 1.48E-13 | 4.44E-14 | 5.11E-15 | 4.23E-01 | 2.44E-12 | 9.72E-09 |
| 598.92681 | 54.18  | 5.95  | 19.30 | 7.72  | 8.65  | 4.31E-84  | 5.11E-15 | 3.54E-04 | 3.84E-08 | 5.11E-15 | 5.11E-15 | 1.71E-01 |
| 598.94511 | 60.13  | 11.41 | 17.05 | 8.87  | 9.26  | 2.83E-81  | 5.11E-15 | 4.45E-14 | 7.51E-12 | 5.11E-15 | 5.11E-15 | 5.24E-01 |
| 599.01732 | 215.95 | 10.15 | 11.78 | 11.66 | 11.73 | 4.79E-04  | 1.87E-03 | 4.30E-03 | 3.73E-03 | 9.93E-01 | 1.00E+00 | 9.99E-01 |

|           |        |       |       |       |       |           |          |          |          |          |          |          |
|-----------|--------|-------|-------|-------|-------|-----------|----------|----------|----------|----------|----------|----------|
| 599.02237 | 19.79  | 15.22 | 17.50 | 17.42 | 17.60 | 2.38E-14  | 5.60E-11 | 1.84E-10 | 3.06E-11 | 9.94E-01 | 9.93E-01 | 9.50E-01 |
| 599.09856 | 17.87  | 14.43 | 18.59 | 18.34 | 18.51 | 5.95E-24  | 4.29E-14 | 4.22E-14 | 4.26E-14 | 9.33E-01 | 9.98E-01 | 9.77E-01 |
| 599.25981 | 163.42 | 17.17 | 16.47 | 16.74 | 16.62 | 2.36E-05  | 1.41E-05 | 1.51E-02 | 1.68E-03 | 2.65E-01 | 7.39E-01 | 8.76E-01 |
| 599.32107 | 179.56 | 22.24 | 21.57 | 21.93 | 21.59 | 1.84E-07  | 1.37E-06 | 6.40E-02 | 5.67E-06 | 2.71E-02 | 9.99E-01 | 5.00E-02 |
| 599.75188 | 57.57  | 12.84 | 12.85 | 15.47 | 14.51 | 3.11E-17  | 1.00E+00 | 7.75E-14 | 3.65E-06 | 2.35E-13 | 7.92E-06 | 2.03E-02 |
| 599.79161 | 47.31  | 14.94 | 17.24 | 16.67 | 16.56 | 1.73E-33  | 5.11E-15 | 3.06E-14 | 4.33E-14 | 2.94E-03 | 4.24E-04 | 9.18E-01 |
| 599.82551 | 49.05  | 14.89 | 16.24 | 16.51 | 16.38 | 5.72E-22  | 8.88E-14 | 4.22E-14 | 4.24E-14 | 3.55E-01 | 8.27E-01 | 8.80E-01 |
| 599.92801 | 64.14  | 9.96  | 13.04 | 8.95  | 9.69  | 1.66E-52  | 5.11E-15 | 4.59E-06 | 5.40E-01 | 5.11E-15 | 5.11E-15 | 3.06E-03 |
| 600.10638 | 17.56  | 20.12 | 19.90 | 19.36 | 18.47 | 1.65E-05  | 9.07E-01 | 1.00E-01 | 1.33E-05 | 3.93E-01 | 3.53E-04 | 5.07E-02 |
| 600.26386 | 154.91 | 15.10 | 13.27 | 13.97 | 14.02 | 4.19E-16  | 4.35E-14 | 9.78E-08 | 1.10E-06 | 2.86E-03 | 1.66E-03 | 9.93E-01 |
| 600.32733 | 184.16 | 20.66 | 19.87 | 20.26 | 19.95 | 3.04E-11  | 2.16E-10 | 2.24E-03 | 1.95E-08 | 5.38E-03 | 9.29E-01 | 4.30E-02 |
| 600.35251 | 186.91 | 10.19 | 13.97 | 14.04 | 12.11 | 4.77E-28  | 1.80E-14 | 1.15E-14 | 3.83E-07 | 9.97E-01 | 1.56E-06 | 4.68E-07 |
| 600.72007 | 65.33  | 13.58 | 10.01 | 12.43 | 12.47 | 2.01E-36  | 5.11E-15 | 3.67E-06 | 1.87E-05 | 3.64E-14 | 4.04E-14 | 9.98E-01 |
| 600.73836 | 64.33  | 14.56 | 9.72  | 12.83 | 12.80 | 3.75E-36  | 5.11E-15 | 1.83E-07 | 2.92E-07 | 4.26E-14 | 4.39E-14 | 1.00E+00 |
| 600.76011 | 58.1   | 18.59 | 17.73 | 19.00 | 18.92 | 6.68E-29  | 5.16E-14 | 3.39E-04 | 8.91E-03 | 5.77E-15 | 1.95E-14 | 8.74E-01 |
| 600.78083 | 46.46  | 19.92 | 21.10 | 21.72 | 21.45 | 2.88E-40  | 3.89E-14 | 5.11E-15 | 5.11E-15 | 1.18E-06 | 1.74E-02 | 1.14E-01 |
| 600.80034 | 50.02  | 15.43 | 16.12 | 15.67 | 15.88 | 9.94E-07  | 3.88E-07 | 2.07E-01 | 2.79E-03 | 2.34E-03 | 2.45E-01 | 3.73E-01 |
| 600.81972 | 47.74  | 17.56 | 18.74 | 18.78 | 18.85 | 1.85E-37  | 5.11E-15 | 5.11E-15 | 5.11E-15 | 9.86E-01 | 6.62E-01 | 8.47E-01 |
| 600.92118 | 55.45  | 10.64 | 14.62 | 9.35  | 9.78  | 1.54E-136 | 5.11E-15 | 5.11E-15 | 4.35E-14 | 5.11E-15 | 5.11E-15 | 7.02E-05 |
| 600.92908 | 63.72  | 12.68 | 15.07 | 10.66 | 11.26 | 2.21E-102 | 5.11E-15 | 5.11E-15 | 5.77E-15 | 5.11E-15 | 5.11E-15 | 3.46E-06 |
| 600.94591 | 59.7   | 11.44 | 16.44 | 12.92 | 12.09 | 7.69E-32  | 5.11E-15 | 3.32E-04 | 3.00E-01 | 4.53E-14 | 1.80E-14 | 1.35E-01 |
| 601.06803 | 26.01  | 10.19 | 12.12 | 13.15 | 11.10 | 6.76E-09  | 2.53E-04 | 3.56E-09 | 2.24E-01 | 1.26E-01 | 1.60E-01 | 1.80E-04 |
| 601.10843 | 17.83  | 17.34 | 17.05 | 15.96 | 15.57 | 8.32E-06  | 8.65E-01 | 1.60E-03 | 5.04E-05 | 2.67E-02 | 1.56E-03 | 7.63E-01 |
| 601.22771 | 56.4   | 13.77 | 15.38 | 11.87 | 12.62 | 1.03E-61  | 3.11E-14 | 5.11E-15 | 5.15E-12 | 5.11E-15 | 5.11E-15 | 1.46E-05 |
| 601.2767  | 163.21 | 13.60 | 10.62 | 11.25 | 11.89 | 1.92E-12  | 2.23E-12 | 2.10E-08 | 1.42E-04 | 3.78E-01 | 1.04E-02 | 3.82E-01 |
| 601.30931 | 292.75 | 15.97 | 15.94 | 16.23 | 15.89 | 4.25E-02  | 9.94E-01 | 1.57E-01 | 9.17E-01 | 1.03E-01 | 9.81E-01 | 4.63E-02 |
| 601.33102 | 186.99 | 18.46 | 18.19 | 17.94 | 17.89 | 5.73E-04  | 2.54E-01 | 2.55E-03 | 1.23E-03 | 3.56E-01 | 2.28E-01 | 9.89E-01 |
| 601.41143 | 194.82 | 12.11 | 13.67 | 13.03 | 11.37 | 1.00E-05  | 3.09E-03 | 1.60E-01 | 3.71E-01 | 4.96E-01 | 1.13E-05 | 2.52E-03 |
| 601.4613  | 268.97 | 15.32 | 13.84 | 14.59 | 15.56 | 1.94E-07  | 8.84E-06 | 6.86E-02 | 8.57E-01 | 6.96E-02 | 7.54E-07 | 1.12E-02 |
| 601.76585 | 48.17  | 13.74 | 12.83 | 12.99 | 13.32 | 8.87E-10  | 2.07E-09 | 5.81E-07 | 1.74E-02 | 6.96E-01 | 5.26E-03 | 9.83E-02 |
| 601.78789 | 51.87  | 15.79 | 17.24 | 17.85 | 17.61 | 1.58E-35  | 4.25E-14 | 5.11E-15 | 5.77E-15 | 2.19E-04 | 6.67E-02 | 3.76E-01 |
| 601.85777 | 37.32  | 16.19 | 17.04 | 17.02 | 16.30 | 5.56E-10  | 3.78E-07 | 5.32E-07 | 8.93E-01 | 9.99E-01 | 3.87E-05 | 5.38E-05 |
| 601.94248 | 50.96  | 12.50 | 15.38 | 16.18 | 14.62 | 2.24E-32  | 2.93E-14 | 5.11E-15 | 1.04E-12 | 1.74E-02 | 3.38E-02 | 2.88E-07 |
| 602.11816 | 21.06  | 14.20 | 8.93  | 8.34  | 8.62  | 1.82E-51  | 5.11E-15 | 5.11E-15 | 5.11E-15 | 2.99E-01 | 8.02E-01 | 8.56E-01 |
| 602.30366 | 204.55 | 17.12 | 16.27 | 16.75 | 17.36 | 3.89E-04  | 5.12E-03 | 4.67E-01 | 7.82E-01 | 2.41E-01 | 3.40E-04 | 1.01E-01 |
| 602.3472  | 214.21 | 22.78 | 23.23 | 23.20 | 22.74 | 1.67E-04  | 5.46E-03 | 1.15E-02 | 9.91E-01 | 9.94E-01 | 3.68E-03 | 7.65E-03 |
| 602.5164  | 236.29 | 15.26 | 14.02 | 13.93 | 15.18 | 1.91E-03  | 2.42E-02 | 1.22E-02 | 9.97E-01 | 9.97E-01 | 6.05E-02 | 3.46E-02 |
| 602.6767  | 90.3   | 10.61 | 9.58  | 10.92 | 9.25  | 1.87E-02  | 2.95E-01 | 9.51E-01 | 1.11E-01 | 1.15E-01 | 9.52E-01 | 3.52E-02 |
| 602.71818 | 58.05  | 19.49 | 19.74 | 20.78 | 20.46 | 9.65E-17  | 3.54E-01 | 5.00E-14 | 1.06E-08 | 5.64E-10 | 5.28E-05 | 1.72E-01 |
| 602.73822 | 61.32  | 16.41 | 14.85 | 17.04 | 16.78 | 3.31E-36  | 3.44E-14 | 8.08E-05 | 6.23E-02 | 5.11E-15 | 5.33E-15 | 2.97E-01 |
| 602.75776 | 52.28  | 17.22 | 15.19 | 17.49 | 17.37 | 1.40E-59  | 5.11E-15 | 5.94E-02 | 5.22E-01 | 5.11E-15 | 5.11E-15 | 7.21E-01 |
| 602.77922 | 53.77  | 18.33 | 19.47 | 20.14 | 19.89 | 1.12E-37  | 4.44E-14 | 5.11E-15 | 5.33E-15 | 5.52E-07 | 4.51E-03 | 2.03E-01 |
| 602.8092  | 38.64  | 13.59 | 13.55 | 13.76 | 13.61 | 9.65E-01  | 1.00E+00 | 9.78E-01 | 1.00E+00 | 9.61E-01 | 9.99E-01 | 9.87E-01 |
| 602.88995 | 43.81  | 12.51 | 14.52 | 14.96 | 14.87 | 1.53E-11  | 4.59E-07 | 4.94E-10 | 7.19E-09 | 6.41E-01 | 8.01E-01 | 9.95E-01 |
| 602.91427 | 39.5   | 12.73 | 14.17 | 13.77 | 13.99 | 2.71E-02  | 2.79E-02 | 1.75E-01 | 8.18E-02 | 8.71E-01 | 9.87E-01 | 9.77E-01 |

|           |        |       |       |       |       |          |          |          |          |          |          |          |
|-----------|--------|-------|-------|-------|-------|----------|----------|----------|----------|----------|----------|----------|
| 603.16043 | 20.46  | 11.13 | 14.73 | 12.42 | 11.81 | 6.59E-08 | 3.01E-08 | 1.25E-01 | 6.78E-01 | 9.73E-04 | 2.93E-05 | 7.55E-01 |
| 603.30564 | 203.62 | 15.45 | 13.12 | 13.98 | 15.21 | 6.75E-14 | 1.60E-12 | 8.23E-06 | 8.64E-01 | 2.70E-02 | 1.55E-09 | 6.37E-04 |
| 603.35075 | 209.7  | 21.07 | 21.51 | 21.50 | 21.06 | 2.64E-04 | 5.87E-03 | 7.86E-03 | 1.00E+00 | 9.99E-01 | 9.36E-03 | 1.23E-02 |
| 603.44113 | 220.13 | 18.14 | 14.33 | 15.33 | 16.30 | 1.91E-29 | 5.11E-15 | 4.13E-14 | 1.14E-08 | 4.20E-03 | 2.67E-09 | 7.13E-03 |
| 603.72179 | 59.68  | 15.40 | 14.07 | 16.61 | 16.25 | 3.34E-27 | 2.15E-09 | 4.00E-08 | 3.62E-04 | 6.00E-15 | 4.26E-14 | 3.20E-01 |
| 603.78283 | 54.26  | 13.80 | 14.56 | 15.62 | 15.26 | 1.51E-10 | 2.11E-02 | 2.32E-10 | 9.78E-07 | 6.99E-04 | 6.09E-02 | 5.74E-01 |
| 603.88062 | 56.48  | 11.84 | 13.89 | 15.87 | 15.22 | 1.86E-24 | 1.55E-07 | 1.53E-14 | 4.27E-14 | 6.42E-07 | 2.53E-03 | 2.91E-01 |
| 604.10334 | 22.01  | 16.96 | 18.66 | 18.61 | 18.01 | 1.91E-14 | 1.66E-12 | 4.33E-12 | 3.30E-05 | 9.96E-01 | 2.44E-02 | 4.19E-02 |
| 604.14423 | 19.88  | 11.62 | 16.08 | 16.54 | 14.96 | 5.81E-23 | 4.32E-14 | 3.55E-14 | 1.71E-10 | 7.68E-01 | 1.06E-01 | 7.40E-03 |
| 604.22785 | 208.82 | 12.48 | 13.02 | 12.97 | 12.57 | 3.29E-01 | 4.17E-01 | 5.07E-01 | 9.94E-01 | 9.99E-01 | 6.21E-01 | 7.09E-01 |
| 604.29956 | 203.04 | 15.17 | 12.96 | 13.43 | 14.55 | 7.60E-17 | 4.52E-14 | 1.94E-10 | 7.44E-02 | 2.50E-01 | 4.91E-08 | 1.95E-04 |
| 604.32586 | 191.51 | 17.87 | 17.16 | 17.48 | 17.24 | 6.40E-03 | 6.57E-03 | 2.72E-01 | 2.61E-02 | 4.65E-01 | 9.84E-01 | 7.13E-01 |
| 604.35918 | 222.26 | 20.34 | 20.24 | 19.69 | 19.58 | 1.42E-04 | 9.59E-01 | 5.06E-03 | 1.19E-03 | 3.05E-02 | 8.66E-03 | 9.55E-01 |
| 604.44531 | 217.32 | 15.53 | 11.40 | 12.03 | 13.46 | 1.84E-13 | 1.01E-12 | 8.15E-10 | 8.72E-04 | 6.49E-01 | 1.49E-03 | 4.81E-02 |
| 604.5322  | 242.46 | 13.91 | 12.71 | 13.50 | 13.44 | 2.59E-02 | 1.23E-02 | 7.06E-01 | 6.38E-01 | 1.99E-01 | 2.89E-01 | 9.99E-01 |
| 604.69585 | 82.71  | 12.62 | 11.68 | 12.27 | 11.77 | 2.66E-02 | 3.51E-02 | 7.41E-01 | 8.03E-02 | 3.35E-01 | 9.95E-01 | 5.06E-01 |
| 604.71664 | 57.46  | 18.54 | 18.46 | 19.73 | 19.40 | 4.66E-21 | 9.50E-01 | 4.51E-14 | 1.36E-08 | 4.15E-14 | 2.10E-09 | 9.49E-02 |
| 604.73562 | 57.69  | 15.45 | 13.66 | 16.42 | 16.16 | 1.17E-41 | 3.20E-14 | 8.03E-08 | 2.40E-04 | 5.11E-15 | 5.11E-15 | 4.49E-01 |
| 604.77292 | 54.66  | 15.38 | 15.59 | 16.43 | 16.17 | 6.59E-13 | 4.39E-01 | 1.10E-11 | 9.06E-07 | 1.47E-07 | 8.65E-04 | 2.98E-01 |
| 604.81201 | 38.25  | 13.06 | 13.65 | 13.52 | 13.77 | 7.91E-02 | 1.73E-01 | 3.59E-01 | 7.53E-02 | 9.76E-01 | 9.76E-01 | 8.42E-01 |
| 604.82785 | 37.19  | 14.22 | 15.29 | 15.29 | 14.85 | 3.98E-04 | 1.18E-03 | 1.04E-03 | 1.41E-01 | 1.00E+00 | 4.48E-01 | 4.40E-01 |
| 604.85177 | 43.55  | 17.30 | 18.92 | 18.71 | 18.87 | 6.47E-21 | 4.49E-14 | 9.90E-14 | 4.40E-14 | 5.98E-01 | 9.91E-01 | 7.92E-01 |
| 604.87233 | 37.77  | 16.54 | 19.33 | 19.18 | 19.14 | 4.80E-26 | 3.24E-14 | 3.95E-14 | 4.26E-14 | 9.31E-01 | 8.85E-01 | 9.99E-01 |
| 605.10578 | 21.16  | 10.32 | 12.40 | 12.18 | 10.99 | 8.10E-05 | 2.60E-04 | 1.26E-03 | 5.56E-01 | 9.72E-01 | 4.02E-02 | 1.08E-01 |
| 605.32936 | 180.61 | 15.03 | 14.84 | 14.44 | 14.73 | 2.66E-01 | 9.22E-01 | 1.98E-01 | 7.65E-01 | 5.60E-01 | 9.85E-01 | 7.93E-01 |
| 605.36426 | 223.12 | 18.26 | 16.46 | 15.28 | 16.37 | 7.13E-23 | 2.35E-10 | 1.20E-14 | 8.09E-11 | 6.83E-05 | 9.85E-01 | 4.53E-04 |
| 605.40671 | 211.77 | 16.22 | 17.77 | 17.85 | 17.33 | 1.75E-11 | 2.58E-09 | 2.72E-10 | 4.53E-05 | 9.88E-01 | 3.06E-01 | 1.66E-01 |
| 605.45623 | 236.72 | 18.61 | 17.72 | 18.32 | 19.04 | 3.25E-16 | 1.99E-09 | 1.35E-01 | 1.08E-02 | 1.24E-04 | 4.33E-14 | 3.96E-06 |
| 605.71968 | 51.32  | 14.11 | 11.34 | 12.51 | 12.91 | 9.99E-20 | 3.49E-14 | 1.35E-08 | 5.33E-05 | 8.55E-05 | 2.01E-07 | 4.71E-01 |
| 605.73349 | 60.2   | 13.99 | 11.98 | 15.66 | 14.82 | 2.76E-30 | 4.47E-12 | 6.31E-09 | 1.29E-02 | 5.11E-15 | 4.17E-14 | 1.45E-02 |
| 605.76289 | 55.67  | 12.75 | 12.59 | 13.59 | 13.68 | 3.38E-03 | 9.69E-01 | 7.50E-02 | 5.19E-02 | 2.83E-02 | 1.93E-02 | 9.96E-01 |
| 605.82021 | 42.55  | 11.84 | 13.75 | 13.34 | 13.63 | 8.24E-13 | 2.68E-11 | 1.26E-07 | 1.12E-09 | 4.19E-01 | 9.71E-01 | 7.20E-01 |
| 605.87636 | 46.81  | 12.43 | 14.21 | 13.86 | 14.65 | 1.82E-06 | 1.44E-04 | 3.22E-03 | 2.08E-06 | 8.39E-01 | 7.34E-01 | 2.54E-01 |
| 605.896   | 59.5   | 12.34 | 10.94 | 12.44 | 13.32 | 2.90E-20 | 1.06E-09 | 9.63E-01 | 4.88E-05 | 1.53E-10 | 3.26E-14 | 4.60E-04 |
| 605.95519 | 22.65  | 9.38  | 15.88 | 15.72 | 14.20 | 1.91E-46 | 5.11E-15 | 5.11E-15 | 7.11E-15 | 9.78E-01 | 3.06E-04 | 1.21E-03 |
| 606.22479 | 144.48 | 16.03 | 15.47 | 16.77 | 16.56 | 1.09E-07 | 5.87E-02 | 4.67E-03 | 9.18E-02 | 1.68E-07 | 3.05E-05 | 8.01E-01 |
| 606.28243 | 194.21 | 15.05 | 13.21 | 14.00 | 13.81 | 1.07E-10 | 2.12E-11 | 1.96E-04 | 1.46E-05 | 1.15E-02 | 1.07E-01 | 8.83E-01 |
| 606.3033  | 197.98 | 19.61 | 19.13 | 19.26 | 19.31 | 1.42E-05 | 6.51E-06 | 1.66E-03 | 1.38E-02 | 5.37E-01 | 2.80E-01 | 9.60E-01 |
| 606.34208 | 194.84 | 16.00 | 14.56 | 14.71 | 14.73 | 4.87E-08 | 4.49E-07 | 5.97E-06 | 1.93E-05 | 9.41E-01 | 9.22E-01 | 1.00E+00 |
| 606.37696 | 219.36 | 16.29 | 14.54 | 14.63 | 14.53 | 1.31E-06 | 2.52E-05 | 5.81E-05 | 3.74E-05 | 9.96E-01 | 1.00E+00 | 9.94E-01 |
| 606.40988 | 207.95 | 14.44 | 15.95 | 15.91 | 15.16 | 3.76E-07 | 3.28E-06 | 5.26E-06 | 8.17E-02 | 9.99E-01 | 5.31E-02 | 7.17E-02 |
| 606.45978 | 237.22 | 16.21 | 15.49 | 16.40 | 17.00 | 9.53E-07 | 2.06E-02 | 8.68E-01 | 1.23E-02 | 2.22E-03 | 1.69E-07 | 1.02E-01 |
| 606.71432 | 59.27  | 15.68 | 12.42 | 16.91 | 16.45 | 1.14E-54 | 5.11E-15 | 2.10E-07 | 4.12E-03 | 5.11E-15 | 5.11E-15 | 1.70E-01 |
| 606.73928 | 56     | 17.02 | 16.04 | 16.92 | 17.10 | 1.48E-10 | 1.12E-08 | 9.33E-01 | 9.61E-01 | 4.46E-07 | 4.87E-09 | 7.23E-01 |
| 606.76686 | 137.74 | 12.46 | 4.97  | 5.50  | 6.34  | 1.97E-45 | 5.11E-15 | 5.11E-15 | 5.11E-15 | 6.52E-01 | 2.23E-02 | 2.88E-01 |

|           |        |       |       |       |       |          |          |          |          |          |          |          |
|-----------|--------|-------|-------|-------|-------|----------|----------|----------|----------|----------|----------|----------|
| 606.81359 | 38.84  | 20.49 | 22.52 | 22.35 | 22.25 | 8.06E-41 | 5.11E-15 | 5.11E-15 | 5.11E-15 | 6.04E-01 | 2.23E-01 | 8.85E-01 |
| 607.07875 | 17.69  | 19.74 | 21.36 | 21.27 | 21.09 | 1.61E-37 | 5.11E-15 | 5.11E-15 | 1.33E-14 | 8.63E-01 | 1.12E-01 | 4.30E-01 |
| 607.22847 | 145.3  | 11.76 | 10.07 | 13.02 | 12.39 | 3.01E-07 | 4.45E-03 | 5.58E-02 | 6.12E-01 | 1.36E-07 | 9.42E-05 | 6.21E-01 |
| 607.30667 | 200.55 | 17.68 | 16.80 | 16.67 | 17.10 | 4.64E-14 | 2.27E-10 | 2.88E-13 | 6.70E-05 | 7.32E-01 | 1.18E-01 | 7.13E-03 |
| 607.47429 | 238.56 | 22.40 | 21.56 | 21.95 | 21.71 | 3.14E-08 | 3.09E-08 | 6.63E-03 | 1.38E-05 | 2.99E-02 | 7.21E-01 | 3.50E-01 |
| 607.73861 | 58.93  | 12.86 | 12.07 | 15.49 | 14.46 | 1.23E-22 | 6.02E-02 | 7.37E-14 | 9.20E-06 | 3.69E-14 | 6.01E-11 | 1.04E-02 |
| 607.77872 | 48.95  | 13.96 | 17.03 | 16.64 | 16.43 | 3.24E-36 | 5.11E-15 | 5.33E-15 | 2.18E-14 | 2.78E-01 | 3.88E-02 | 7.75E-01 |
| 607.81332 | 46.14  | 16.23 | 18.87 | 18.72 | 18.61 | 8.70E-40 | 5.11E-15 | 5.11E-15 | 5.11E-15 | 8.47E-01 | 5.28E-01 | 9.40E-01 |
| 607.97821 | 24.6   | 11.02 | 12.84 | 13.49 | 12.37 | 4.08E-10 | 3.52E-06 | 1.61E-10 | 1.52E-03 | 2.88E-01 | 5.80E-01 | 1.50E-02 |
| 608.0804  | 17.97  | 17.73 | 19.33 | 19.29 | 19.09 | 1.64E-37 | 5.11E-15 | 5.11E-15 | 1.29E-14 | 9.85E-01 | 1.85E-01 | 3.34E-01 |
| 608.24031 | 177.51 | 15.91 | 16.77 | 17.18 | 16.13 | 4.31E-10 | 9.82E-05 | 1.95E-09 | 7.13E-01 | 1.62E-01 | 1.03E-02 | 2.75E-06 |
| 608.31981 | 200.76 | 20.71 | 18.51 | 19.51 | 17.56 | 1.31E-40 | 7.99E-15 | 2.41E-09 | 5.11E-15 | 1.61E-06 | 1.30E-05 | 4.13E-14 |
| 608.35764 | 205.43 | 18.44 | 18.75 | 18.66 | 19.39 | 1.72E-03 | 5.66E-01 | 7.81E-01 | 7.62E-04 | 9.85E-01 | 5.46E-02 | 2.00E-02 |
| 608.39255 | 206.68 | 14.48 | 13.51 | 14.02 | 14.71 | 2.98E-03 | 1.63E-02 | 4.82E-01 | 9.07E-01 | 4.14E-01 | 3.26E-03 | 1.86E-01 |
| 608.47728 | 238.75 | 21.11 | 20.26 | 20.65 | 20.45 | 9.26E-08 | 5.58E-08 | 6.49E-03 | 5.50E-05 | 4.10E-02 | 5.98E-01 | 5.38E-01 |
| 608.56309 | 266.55 | 16.99 | 15.91 | 16.05 | 18.08 | 8.95E-08 | 1.96E-02 | 5.37E-02 | 2.28E-02 | 9.81E-01 | 4.35E-07 | 2.17E-06 |
| 608.72681 | 75.71  | 14.14 | 11.27 | 12.68 | 12.69 | 5.07E-12 | 3.30E-13 | 2.72E-04 | 5.31E-04 | 8.27E-04 | 1.21E-03 | 1.00E+00 |
| 608.74719 | 52.4   | 18.83 | 18.38 | 19.25 | 19.07 | 4.24E-09 | 3.60E-03 | 7.43E-03 | 2.74E-01 | 2.56E-09 | 5.88E-06 | 5.64E-01 |
| 608.78088 | 53.39  | 13.54 | 15.98 | 14.85 | 14.87 | 8.48E-10 | 7.40E-11 | 8.06E-04 | 1.09E-03 | 7.27E-03 | 1.20E-02 | 1.00E+00 |
| 608.80786 | 39.54  | 18.73 | 20.34 | 20.20 | 20.15 | 1.20E-40 | 5.11E-15 | 5.11E-15 | 5.11E-15 | 5.76E-01 | 3.27E-01 | 9.67E-01 |
| 608.86181 | 43.16  | 13.91 | 15.32 | 15.58 | 16.18 | 4.47E-15 | 5.27E-07 | 1.43E-09 | 4.97E-14 | 7.35E-01 | 8.66E-03 | 1.20E-01 |
| 608.90516 | 58.24  | 11.55 | 13.43 | 10.30 | 11.30 | 4.71E-13 | 4.97E-06 | 3.90E-03 | 9.05E-01 | 1.06E-13 | 7.35E-07 | 4.99E-02 |
| 609.08289 | 25.9   | 13.64 | 15.81 | 15.72 | 15.61 | 3.09E-27 | 2.35E-14 | 3.44E-14 | 4.42E-14 | 9.72E-01 | 7.74E-01 | 9.49E-01 |
| 609.24373 | 187.11 | 12.39 | 12.86 | 14.28 | 13.60 | 2.27E-08 | 4.39E-01 | 2.05E-08 | 1.03E-03 | 6.20E-05 | 1.05E-01 | 1.57E-01 |
| 609.32282 | 196.83 | 18.66 | 17.38 | 18.02 | 16.35 | 3.86E-27 | 4.17E-11 | 1.99E-03 | 5.33E-15 | 2.35E-03 | 5.77E-07 | 4.29E-14 |
| 609.34155 | 178.5  | 9.55  | 13.57 | 14.78 | 8.80  | 1.32E-25 | 3.09E-11 | 4.25E-14 | 5.51E-01 | 1.43E-01 | 1.60E-13 | 4.10E-14 |
| 609.36149 | 198.82 | 16.48 | 17.18 | 17.15 | 17.62 | 1.32E-04 | 2.20E-02 | 3.03E-02 | 4.17E-05 | 9.99E-01 | 3.06E-01 | 2.37E-01 |
| 609.48425 | 239.13 | 20.33 | 19.56 | 20.03 | 19.74 | 4.02E-06 | 3.22E-06 | 1.83E-01 | 9.28E-04 | 1.18E-02 | 6.51E-01 | 2.53E-01 |
| 609.51027 | 248.36 | 19.58 | 18.47 | 18.42 | 18.98 | 1.28E-06 | 1.90E-05 | 5.35E-06 | 6.09E-02 | 9.96E-01 | 1.60E-01 | 9.56E-02 |
| 609.75182 | 60.33  | 15.06 | 13.74 | 14.78 | 14.33 | 1.43E-06 | 9.22E-07 | 6.47E-01 | 1.97E-02 | 2.46E-04 | 1.03E-01 | 2.94E-01 |
| 609.78349 | 47.13  | 12.02 | 14.55 | 14.19 | 14.77 | 3.86E-24 | 4.09E-14 | 5.00E-14 | 3.72E-14 | 5.10E-01 | 8.36E-01 | 1.27E-01 |
| 609.81124 | 41.15  | 13.34 | 13.33 | 13.11 | 13.48 | 2.58E-01 | 1.00E+00 | 5.64E-01 | 8.64E-01 | 6.06E-01 | 8.61E-01 | 1.92E-01 |
| 610.2558  | 171.36 | 13.93 | 13.41 | 13.79 | 12.94 | 8.17E-03 | 3.04E-01 | 9.65E-01 | 7.15E-03 | 5.97E-01 | 4.31E-01 | 3.31E-02 |
| 610.32438 | 192.21 | 15.80 | 13.81 | 15.75 | 13.37 | 3.13E-18 | 7.78E-10 | 9.98E-01 | 3.82E-13 | 4.25E-09 | 4.89E-01 | 2.46E-12 |
| 610.37191 | 198.88 | 16.56 | 14.30 | 15.13 | 15.09 | 2.26E-13 | 9.24E-14 | 1.31E-06 | 1.61E-06 | 1.65E-02 | 3.26E-02 | 9.99E-01 |
| 610.49252 | 244.02 | 18.30 | 17.60 | 18.04 | 17.85 | 4.24E-04 | 1.73E-04 | 3.84E-01 | 4.25E-02 | 4.47E-02 | 4.61E-01 | 6.95E-01 |
| 610.51415 | 249.36 | 17.91 | 16.51 | 16.16 | 16.97 | 1.14E-07 | 2.94E-05 | 9.01E-08 | 1.31E-02 | 6.77E-01 | 4.63E-01 | 5.30E-02 |
| 610.68445 | 74.91  | 15.54 | 16.03 | 16.79 | 16.13 | 4.46E-14 | 4.08E-03 | 4.62E-14 | 4.62E-04 | 2.86E-06 | 9.10E-01 | 1.03E-04 |
| 610.70513 | 73.09  | 12.81 | 11.06 | 12.86 | 12.40 | 3.32E-07 | 2.29E-06 | 9.99E-01 | 6.38E-01 | 1.79E-06 | 1.02E-03 | 5.55E-01 |
| 610.74471 | 64.52  | 16.93 | 15.73 | 17.09 | 16.87 | 4.98E-27 | 3.73E-14 | 4.45E-01 | 9.65E-01 | 9.33E-15 | 4.23E-14 | 2.42E-01 |
| 610.76271 | 47.68  | 19.97 | 20.49 | 20.85 | 20.53 | 6.88E-22 | 1.68E-09 | 1.84E-14 | 2.25E-10 | 5.72E-05 | 9.58E-01 | 7.11E-04 |
| 610.79299 | 44.91  | 13.40 | 12.83 | 13.32 | 12.82 | 1.75E-01 | 3.17E-01 | 9.96E-01 | 3.20E-01 | 4.62E-01 | 1.00E+00 | 4.61E-01 |
| 610.80183 | 41.72  | 14.17 | 13.06 | 13.14 | 13.55 | 4.43E-14 | 1.60E-12 | 2.34E-11 | 1.98E-04 | 9.59E-01 | 6.82E-03 | 2.77E-02 |
| 610.82099 | 44.88  | 16.59 | 18.98 | 19.06 | 19.01 | 2.12E-43 | 5.11E-15 | 5.11E-15 | 5.11E-15 | 9.69E-01 | 9.99E-01 | 9.92E-01 |
| 610.83816 | 37.18  | 11.38 | 11.73 | 12.68 | 12.61 | 8.27E-04 | 7.80E-01 | 2.80E-03 | 7.69E-03 | 6.24E-02 | 1.14E-01 | 9.98E-01 |

|           |        |       |       |       |       |           |          |          |          |          |          |          |
|-----------|--------|-------|-------|-------|-------|-----------|----------|----------|----------|----------|----------|----------|
| 610.88016 | 42.89  | 15.54 | 13.97 | 13.93 | 14.57 | 2.13E-03  | 5.74E-03 | 3.65E-03 | 1.89E-01 | 1.00E+00 | 6.29E-01 | 5.60E-01 |
| 611.0016  | 24     | 10.00 | 12.68 | 12.05 | 12.18 | 3.00E-12  | 1.18E-11 | 1.70E-07 | 7.06E-08 | 3.14E-01 | 5.59E-01 | 9.84E-01 |
| 611.1317  | 57.02  | 11.80 | 19.12 | 9.91  | 10.45 | 8.03E-140 | 5.11E-15 | 7.33E-15 | 9.84E-14 | 5.11E-15 | 5.11E-15 | 6.94E-03 |
| 611.14594 | 21.44  | 21.38 | 25.05 | 24.89 | 24.85 | 1.07E-32  | 5.33E-15 | 7.33E-15 | 1.40E-14 | 9.55E-01 | 9.22E-01 | 9.99E-01 |
| 611.26031 | 163.74 | 11.85 | 11.59 | 12.54 | 11.01 | 1.20E-03  | 8.82E-01 | 2.29E-01 | 1.07E-01 | 5.21E-02 | 4.31E-01 | 4.33E-04 |
| 611.32202 | 172    | 11.94 | 11.88 | 11.58 | 10.68 | 1.80E-02  | 9.99E-01 | 8.26E-01 | 1.82E-02 | 8.98E-01 | 3.36E-02 | 1.62E-01 |
| 611.37922 | 168.04 | 15.00 | 13.04 | 12.93 | 13.16 | 2.95E-14  | 7.16E-11 | 4.71E-12 | 2.60E-09 | 9.82E-01 | 9.73E-01 | 8.55E-01 |
| 611.50464 | 256.77 | 17.23 | 14.23 | 16.20 | 16.02 | 1.63E-10  | 1.72E-11 | 5.42E-02 | 1.98E-02 | 2.00E-05 | 2.56E-04 | 9.70E-01 |
| 611.52593 | 256.3  | 21.00 | 21.11 | 21.03 | 21.09 | 9.72E-01  | 9.72E-01 | 9.99E-01 | 9.88E-01 | 9.90E-01 | 1.00E+00 | 9.97E-01 |
| 611.76595 | 56.89  | 15.44 | 15.18 | 16.09 | 15.81 | 5.66E-10  | 2.02E-01 | 9.53E-06 | 3.50E-02 | 9.18E-10 | 5.98E-05 | 1.92E-01 |
| 611.80134 | 44.74  | 15.80 | 16.37 | 15.61 | 15.67 | 9.77E-05  | 6.50E-03 | 6.60E-01 | 8.87E-01 | 1.31E-04 | 1.00E-03 | 9.82E-01 |
| 611.82671 | 44.36  | 13.47 | 13.65 | 13.59 | 14.13 | 1.22E-02  | 8.12E-01 | 9.31E-01 | 7.98E-03 | 9.92E-01 | 1.03E-01 | 5.01E-02 |
| 612.01645 | 17.05  | 10.74 | 17.59 | 15.99 | 13.77 | 1.57E-40  | 5.11E-15 | 5.33E-15 | 1.16E-10 | 1.18E-03 | 4.77E-14 | 4.31E-06 |
| 612.13451 | 57.2   | 9.77  | 14.98 | 8.80  | 9.15  | 1.37E-102 | 5.11E-15 | 5.44E-08 | 1.55E-03 | 5.11E-15 | 5.11E-15 | 1.80E-01 |
| 612.33126 | 203.45 | 23.37 | 23.65 | 23.85 | 23.75 | 3.53E-04  | 7.21E-02 | 2.11E-04 | 7.93E-03 | 3.27E-01 | 8.46E-01 | 8.39E-01 |
| 612.3888  | 224.6  | 14.36 | 18.92 | 17.64 | 18.84 | 6.30E-23  | 4.02E-14 | 1.05E-11 | 4.33E-14 | 2.54E-02 | 9.98E-01 | 5.01E-02 |
| 612.5104  | 251.78 | 16.11 | 12.95 | 14.15 | 15.14 | 9.52E-15  | 4.80E-14 | 7.83E-07 | 4.83E-02 | 7.65E-03 | 2.07E-07 | 4.69E-02 |
| 612.52998 | 256.96 | 19.44 | 19.65 | 19.61 | 19.57 | 8.95E-01  | 8.84E-01 | 9.33E-01 | 9.69E-01 | 9.99E-01 | 9.94E-01 | 9.99E-01 |
| 612.68276 | 66.61  | 13.41 | 11.96 | 14.10 | 12.87 | 3.00E-16  | 4.49E-09 | 1.20E-02 | 9.85E-02 | 4.21E-14 | 8.72E-04 | 2.77E-06 |
| 612.70032 | 71.17  | 16.05 | 16.10 | 17.05 | 16.58 | 2.28E-18  | 9.70E-01 | 4.23E-14 | 3.41E-05 | 6.79E-14 | 3.43E-04 | 3.10E-04 |
| 612.75928 | 48.83  | 18.62 | 18.81 | 19.13 | 18.74 | 6.65E-07  | 1.44E-01 | 2.04E-07 | 5.29E-01 | 3.61E-03 | 8.93E-01 | 3.50E-04 |
| 612.79888 | 44.3   | 13.59 | 15.56 | 14.41 | 15.05 | 2.51E-11  | 1.82E-11 | 1.25E-02 | 1.49E-06 | 1.80E-04 | 2.64E-01 | 9.90E-02 |
| 612.81828 | 46.18  | 15.32 | 16.21 | 16.57 | 16.56 | 6.18E-18  | 1.23E-08 | 4.27E-14 | 6.14E-14 | 6.40E-02 | 9.01E-02 | 1.00E+00 |
| 612.83838 | 44.4   | 17.89 | 18.44 | 18.23 | 18.60 | 9.73E-05  | 2.85E-03 | 1.34E-01 | 7.69E-05 | 5.34E-01 | 7.53E-01 | 9.75E-02 |
| 612.8587  | 45.05  | 13.87 | 16.54 | 16.94 | 16.44 | 9.45E-26  | 4.26E-14 | 1.73E-14 | 4.11E-14 | 4.74E-01 | 9.85E-01 | 2.95E-01 |
| 612.94434 | 65.22  | 8.10  | 14.71 | 9.01  | 8.01  | 4.89E-47  | 5.11E-15 | 8.61E-02 | 9.97E-01 | 5.11E-15 | 5.11E-15 | 7.03E-02 |
| 612.9543  | 163.15 | 8.76  | 8.04  | 8.41  | 12.66 | 9.28E-45  | 3.03E-02 | 5.27E-01 | 5.11E-15 | 5.00E-01 | 5.11E-15 | 5.11E-15 |
| 612.98295 | 60.03  | 12.15 | 17.97 | 10.11 | 11.07 | 1.00E-95  | 5.11E-15 | 4.29E-14 | 1.44E-05 | 5.11E-15 | 5.11E-15 | 2.27E-04 |
| 612.99925 | 17.75  | 11.64 | 18.23 | 18.29 | 15.69 | 4.52E-52  | 5.11E-15 | 5.11E-15 | 3.13E-14 | 9.99E-01 | 1.55E-09 | 4.69E-10 |
| 613.03396 | 21.86  | 9.41  | 14.90 | 14.67 | 13.09 | 2.49E-17  | 4.73E-14 | 7.15E-14 | 2.31E-07 | 9.85E-01 | 3.52E-02 | 7.98E-02 |
| 613.12867 | 65.73  | 10.23 | 15.87 | 9.11  | 9.50  | 4.03E-134 | 5.11E-15 | 4.37E-14 | 2.19E-07 | 5.11E-15 | 5.11E-15 | 1.59E-02 |
| 613.14153 | 18.34  | 19.54 | 21.65 | 21.66 | 21.68 | 1.97E-36  | 5.11E-15 | 5.11E-15 | 5.11E-15 | 1.00E+00 | 9.99E-01 | 9.99E-01 |
| 613.3347  | 205.85 | 21.74 | 22.00 | 22.21 | 22.11 | 3.71E-04  | 9.25E-02 | 2.07E-04 | 9.25E-03 | 2.73E-01 | 8.20E-01 | 8.13E-01 |
| 613.39305 | 210.32 | 11.42 | 15.73 | 14.47 | 16.13 | 3.61E-16  | 7.34E-13 | 2.87E-07 | 7.26E-14 | 1.08E-01 | 9.04E-01 | 2.10E-02 |
| 613.53958 | 274.88 | 17.24 | 17.24 | 17.22 | 18.05 | 1.70E-01  | 1.00E+00 | 1.00E+00 | 2.28E-01 | 1.00E+00 | 2.49E-01 | 2.22E-01 |
| 613.71979 | 52.32  | 12.83 | 9.78  | 12.78 | 12.54 | 3.22E-28  | 1.04E-14 | 9.98E-01 | 6.88E-01 | 1.87E-14 | 4.26E-14 | 7.97E-01 |
| 613.74975 | 57.05  | 13.39 | 12.96 | 14.20 | 13.90 | 2.17E-04  | 4.36E-01 | 2.47E-02 | 3.11E-01 | 1.92E-04 | 1.13E-02 | 7.49E-01 |
| 613.80424 | 45.45  | 12.83 | 13.26 | 12.70 | 13.53 | 1.91E-02  | 4.14E-01 | 9.67E-01 | 7.32E-02 | 2.07E-01 | 8.00E-01 | 2.61E-02 |
| 613.95578 | 20.3   | 13.36 | 12.79 | 13.64 | 13.89 | 1.06E-01  | 5.66E-01 | 9.17E-01 | 6.46E-01 | 2.33E-01 | 8.64E-02 | 9.50E-01 |
| 613.98628 | 61.03  | 13.50 | 13.70 | 11.58 | 12.28 | 7.49E-70  | 9.43E-02 | 5.11E-15 | 5.11E-15 | 5.11E-15 | 5.11E-15 | 7.03E-12 |
| 614.14496 | 18.05  | 17.18 | 19.24 | 19.27 | 19.27 | 2.77E-32  | 8.66E-15 | 6.66E-15 | 9.99E-15 | 9.99E-01 | 9.98E-01 | 1.00E+00 |
| 614.26809 | 181.85 | 15.14 | 12.22 | 12.96 | 13.79 | 6.20E-15  | 5.00E-14 | 2.53E-09 | 7.18E-04 | 1.40E-01 | 8.94E-05 | 8.74E-02 |
| 614.34275 | 211.03 | 21.46 | 21.81 | 21.66 | 21.41 | 2.22E-02  | 5.44E-02 | 4.69E-01 | 9.88E-01 | 6.92E-01 | 3.31E-02 | 3.28E-01 |
| 614.5241  | 264.1  | 17.03 | 16.94 | 17.82 | 17.36 | 4.01E-03  | 9.84E-01 | 1.18E-02 | 5.90E-01 | 5.07E-03 | 4.01E-01 | 3.27E-01 |
| 614.69643 | 71.08  | 14.25 | 12.74 | 15.73 | 15.21 | 4.63E-14  | 1.70E-04 | 2.16E-04 | 4.33E-02 | 1.22E-13 | 1.63E-09 | 5.04E-01 |

|           |        |       |       |       |       |           |          |          |          |          |          |          |
|-----------|--------|-------|-------|-------|-------|-----------|----------|----------|----------|----------|----------|----------|
| 614.72579 | 58.75  | 14.20 | 11.84 | 15.02 | 14.22 | 8.73E-26  | 4.37E-14 | 7.52E-03 | 1.00E+00 | 6.66E-15 | 4.46E-14 | 1.53E-02 |
| 614.75405 | 44.06  | 15.84 | 15.61 | 16.23 | 15.73 | 2.27E-02  | 6.70E-01 | 2.18E-01 | 9.51E-01 | 1.65E-02 | 9.45E-01 | 8.95E-02 |
| 614.77627 | 49.63  | 15.24 | 13.20 | 13.40 | 14.04 | 1.19E-10  | 7.69E-10 | 2.21E-08 | 8.06E-04 | 9.16E-01 | 4.48E-02 | 1.84E-01 |
| 614.79663 | 53.2   | 18.80 | 19.24 | 19.99 | 19.85 | 8.56E-29  | 5.59E-05 | 6.22E-15 | 3.94E-14 | 1.43E-11 | 8.24E-08 | 5.64E-01 |
| 614.83601 | 48.47  | 14.80 | 14.00 | 14.12 | 14.96 | 6.95E-03  | 6.02E-02 | 1.35E-01 | 9.64E-01 | 9.84E-01 | 2.47E-02 | 5.92E-02 |
| 614.85464 | 39.45  | 15.85 | 18.61 | 17.97 | 18.09 | 2.20E-19  | 4.37E-14 | 5.57E-12 | 2.04E-12 | 1.21E-01 | 3.09E-01 | 9.75E-01 |
| 614.92247 | 65.05  | 13.09 | 15.42 | 11.14 | 11.85 | 2.29E-102 | 5.11E-15 | 5.11E-15 | 2.00E-14 | 5.11E-15 | 5.11E-15 | 1.05E-08 |
| 614.94092 | 67.48  | 12.91 | 13.27 | 10.91 | 11.64 | 1.03E-64  | 2.32E-03 | 5.11E-15 | 7.55E-15 | 5.11E-15 | 5.11E-15 | 7.38E-10 |
| 614.98661 | 60.38  | 12.96 | 14.71 | 10.98 | 11.68 | 1.81E-100 | 5.11E-15 | 5.11E-15 | 5.11E-15 | 5.11E-15 | 5.11E-15 | 1.83E-10 |
| 615.14625 | 17.27  | 13.34 | 16.45 | 16.35 | 16.18 | 1.42E-27  | 2.22E-14 | 2.89E-14 | 4.23E-14 | 9.85E-01 | 8.06E-01 | 9.43E-01 |
| 615.23416 | 155.66 | 14.71 | 14.88 | 15.76 | 14.70 | 4.04E-06  | 8.81E-01 | 1.82E-05 | 1.00E+00 | 6.69E-04 | 8.73E-01 | 4.34E-05 |
| 615.32456 | 289.74 | 17.05 | 17.13 | 17.64 | 16.44 | 3.96E-14  | 9.30E-01 | 4.56E-05 | 4.38E-05 | 8.71E-04 | 5.79E-06 | 4.42E-14 |
| 615.33809 | 206.89 | 14.63 | 13.62 | 14.95 | 14.88 | 5.11E-06  | 1.21E-03 | 6.14E-01 | 7.90E-01 | 1.22E-05 | 7.25E-05 | 9.95E-01 |
| 615.35038 | 217.43 | 19.60 | 19.96 | 19.68 | 19.46 | 2.49E-02  | 1.13E-01 | 9.66E-01 | 8.01E-01 | 3.00E-01 | 1.51E-02 | 5.43E-01 |
| 615.72585 | 59.77  | 12.87 | 10.38 | 14.63 | 13.14 | 1.59E-30  | 6.77E-14 | 4.03E-08 | 8.12E-01 | 5.11E-15 | 4.26E-14 | 1.42E-05 |
| 615.76567 | 51.03  | 14.85 | 16.73 | 16.49 | 16.10 | 6.29E-29  | 5.33E-15 | 2.69E-14 | 2.22E-13 | 3.91E-01 | 5.85E-04 | 7.10E-02 |
| 615.79929 | 46.31  | 14.13 | 13.14 | 14.04 | 14.12 | 1.14E-08  | 1.32E-07 | 9.50E-01 | 1.00E+00 | 3.12E-06 | 8.95E-07 | 9.73E-01 |
| 615.89431 | 30.85  | 11.24 | 12.58 | 12.39 | 12.38 | 6.92E-04  | 1.17E-03 | 7.01E-03 | 1.09E-02 | 9.51E-01 | 9.49E-01 | 1.00E+00 |
| 616.32585 | 219.07 | 14.35 | 17.17 | 16.94 | 14.73 | 5.30E-25  | 4.34E-14 | 4.36E-14 | 5.58E-01 | 8.50E-01 | 1.53E-13 | 9.61E-12 |
| 616.35789 | 216.96 | 20.33 | 17.19 | 16.82 | 17.28 | 3.84E-54  | 5.11E-15 | 5.11E-15 | 5.11E-15 | 1.86E-01 | 9.68E-01 | 7.54E-02 |
| 616.71026 | 71.87  | 14.67 | 11.25 | 13.98 | 14.29 | 6.55E-29  | 5.33E-15 | 5.03E-02 | 5.10E-01 | 4.31E-14 | 3.62E-14 | 6.96E-01 |
| 616.71696 | 69.17  | 14.11 | 11.94 | 12.23 | 11.80 | 2.73E-18  | 7.11E-14 | 1.72E-11 | 4.46E-14 | 6.97E-01 | 9.51E-01 | 3.81E-01 |
| 616.73377 | 60.54  | 16.84 | 15.21 | 17.23 | 17.05 | 4.04E-29  | 4.29E-14 | 6.33E-02 | 5.71E-01 | 5.77E-15 | 2.86E-14 | 6.90E-01 |
| 616.75473 | 54.92  | 19.10 | 19.74 | 20.61 | 20.36 | 4.50E-28  | 2.51E-06 | 5.77E-15 | 4.35E-14 | 2.33E-10 | 1.61E-05 | 2.18E-01 |
| 616.77458 | 54.38  | 15.46 | 15.65 | 16.18 | 16.03 | 2.49E-11  | 2.45E-01 | 1.68E-10 | 1.51E-06 | 7.64E-06 | 4.35E-03 | 4.86E-01 |
| 616.79346 | 45.03  | 17.63 | 18.28 | 18.55 | 18.52 | 3.15E-23  | 2.44E-11 | 3.66E-14 | 4.35E-14 | 1.44E-02 | 4.58E-02 | 9.89E-01 |
| 616.91789 | 57.6   | 10.96 | 15.28 | 12.27 | 12.06 | 7.50E-23  | 1.60E-14 | 3.04E-03 | 2.59E-02 | 1.38E-12 | 2.70E-13 | 9.47E-01 |
| 617.20032 | 64.92  | 13.84 | 15.15 | 11.99 | 12.64 | 3.80E-72  | 2.09E-14 | 5.11E-15 | 4.35E-14 | 5.11E-15 | 5.11E-15 | 1.44E-06 |
| 617.27392 | 98.5   | 14.46 | 11.33 | 13.11 | 13.10 | 1.52E-07  | 1.64E-08 | 3.76E-02 | 4.63E-02 | 3.60E-03 | 5.55E-03 | 1.00E+00 |
| 617.32947 | 216.53 | 11.69 | 14.74 | 13.92 | 13.17 | 1.99E-12  | 1.09E-12 | 1.33E-07 | 1.55E-03 | 1.69E-01 | 8.91E-04 | 2.44E-01 |
| 617.36351 | 207.05 | 18.36 | 13.66 | 13.77 | 14.21 | 3.54E-27  | 2.40E-14 | 2.89E-14 | 4.29E-14 | 9.94E-01 | 5.99E-01 | 7.51E-01 |
| 617.73929 | 25.37  | 12.84 | 8.69  | 11.67 | 12.18 | 1.77E-15  | 4.63E-14 | 6.33E-02 | 5.18E-01 | 1.65E-08 | 1.76E-10 | 7.39E-01 |
| 617.7613  | 54.44  | 14.94 | 15.72 | 16.69 | 16.47 | 2.90E-18  | 2.89E-04 | 4.35E-14 | 8.06E-13 | 6.19E-06 | 1.21E-03 | 6.88E-01 |
| 617.81038 | 44.78  | 14.26 | 17.19 | 16.47 | 16.45 | 7.46E-23  | 2.66E-14 | 7.75E-14 | 3.63E-13 | 3.95E-02 | 4.24E-02 | 1.00E+00 |
| 617.83168 | 38.93  | 16.16 | 16.69 | 16.92 | 16.09 | 4.80E-04  | 9.11E-02 | 3.67E-03 | 9.86E-01 | 7.17E-01 | 5.42E-02 | 2.15E-03 |
| 617.91668 | 54.59  | 11.29 | 14.66 | 15.84 | 14.67 | 1.54E-39  | 8.88E-15 | 5.11E-15 | 1.29E-14 | 3.44E-04 | 1.00E+00 | 5.65E-04 |
| 618.08665 | 18.33  | 17.87 | 19.55 | 19.52 | 19.09 | 4.23E-29  | 7.99E-15 | 9.55E-15 | 6.69E-14 | 9.97E-01 | 1.31E-02 | 2.19E-02 |
| 618.31277 | 40.97  | 9.98  | 13.24 | 11.38 | 12.10 | 7.28E-09  | 1.55E-09 | 2.26E-02 | 2.36E-04 | 1.54E-03 | 1.24E-01 | 5.11E-01 |
| 618.34183 | 178.97 | 13.24 | 12.56 | 13.03 | 13.36 | 2.01E-01  | 2.85E-01 | 9.40E-01 | 9.90E-01 | 6.33E-01 | 1.96E-01 | 8.34E-01 |
| 618.37688 | 193.98 | 12.92 | 13.04 | 12.93 | 12.97 | 9.90E-01  | 9.90E-01 | 1.00E+00 | 9.99E-01 | 9.93E-01 | 9.99E-01 | 9.99E-01 |
| 618.71248 | 65.25  | 15.01 | 12.47 | 16.25 | 15.77 | 5.83E-46  | 6.00E-15 | 3.86E-08 | 2.49E-03 | 5.11E-15 | 5.11E-15 | 1.20E-01 |
| 618.73235 | 62.48  | 15.98 | 13.39 | 16.10 | 16.21 | 2.86E-47  | 5.11E-15 | 8.67E-01 | 4.99E-01 | 5.11E-15 | 5.11E-15 | 9.17E-01 |
| 618.75274 | 54.11  | 17.73 | 18.33 | 19.29 | 19.00 | 1.22E-27  | 2.35E-05 | 5.77E-15 | 4.27E-14 | 2.56E-11 | 9.90E-06 | 1.30E-01 |
| 618.7847  | 43.25  | 14.69 | 14.52 | 14.37 | 14.32 | 3.65E-01  | 8.73E-01 | 4.79E-01 | 3.74E-01 | 9.15E-01 | 8.30E-01 | 9.96E-01 |
| 618.81262 | 44.13  | 11.94 | 15.19 | 14.09 | 15.10 | 2.49E-12  | 7.10E-11 | 1.74E-05 | 5.80E-10 | 8.82E-02 | 9.98E-01 | 1.48E-01 |

|           |        |       |       |       |       |           |          |          |          |          |          |          |
|-----------|--------|-------|-------|-------|-------|-----------|----------|----------|----------|----------|----------|----------|
| 618.86596 | 42.79  | 14.61 | 15.67 | 16.09 | 15.92 | 1.16E-08  | 1.45E-04 | 2.81E-08 | 2.97E-06 | 3.26E-01 | 7.75E-01 | 8.99E-01 |
| 618.88804 | 43.13  | 15.16 | 17.98 | 17.85 | 17.97 | 2.28E-21  | 4.24E-14 | 4.41E-14 | 4.27E-14 | 9.79E-01 | 1.00E+00 | 9.84E-01 |
| 619.01115 | 23.92  | 17.66 | 17.33 | 17.66 | 17.38 | 4.81E-02  | 1.22E-01 | 1.00E+00 | 2.54E-01 | 1.34E-01 | 9.90E-01 | 2.70E-01 |
| 619.0899  | 17.39  | 14.80 | 16.88 | 16.89 | 15.97 | 5.74E-19  | 4.24E-14 | 4.31E-14 | 1.02E-05 | 1.00E+00 | 1.39E-03 | 1.11E-03 |
| 619.24784 | 171.02 | 15.38 | 13.99 | 14.34 | 14.45 | 1.69E-11  | 1.38E-11 | 3.10E-07 | 1.22E-05 | 2.71E-01 | 1.00E-01 | 9.45E-01 |
| 619.28948 | 136.65 | 23.07 | 22.86 | 22.87 | 22.49 | 4.20E-03  | 5.08E-01 | 5.59E-01 | 1.49E-03 | 1.00E+00 | 1.03E-01 | 7.99E-02 |
| 619.55309 | 17.46  | 9.61  | 11.73 | 12.35 | 10.95 | 9.65E-10  | 2.73E-06 | 6.89E-10 | 8.32E-03 | 4.52E-01 | 2.72E-01 | 6.89E-03 |
| 619.75676 | 56.94  | 14.04 | 12.70 | 15.00 | 14.79 | 4.15E-17  | 1.01E-06 | 8.12E-04 | 2.01E-02 | 4.30E-14 | 5.84E-13 | 8.52E-01 |
| 619.78776 | 46.54  | 13.28 | 16.27 | 15.01 | 15.45 | 1.78E-19  | 3.91E-14 | 4.16E-08 | 2.93E-11 | 1.71E-04 | 3.95E-02 | 4.62E-01 |
| 619.85901 | 43.52  | 12.17 | 13.34 | 13.14 | 13.74 | 1.23E-03  | 1.76E-02 | 6.52E-02 | 8.20E-04 | 9.61E-01 | 7.75E-01 | 4.73E-01 |
| 619.94033 | 54.63  | 13.98 | 11.27 | 12.45 | 13.15 | 4.43E-15  | 4.41E-14 | 4.11E-06 | 3.83E-02 | 1.09E-03 | 1.03E-07 | 1.25E-01 |
| 620.25921 | 194.99 | 12.31 | 13.44 | 13.86 | 13.10 | 3.39E-04  | 1.20E-02 | 1.52E-04 | 1.49E-01 | 6.63E-01 | 8.23E-01 | 1.96E-01 |
| 620.29288 | 136.49 | 21.35 | 21.06 | 21.20 | 20.78 | 3.16E-03  | 2.25E-01 | 7.41E-01 | 1.49E-03 | 8.09E-01 | 2.79E-01 | 3.94E-02 |
| 620.31928 | 201.6  | 17.95 | 16.38 | 16.49 | 16.69 | 8.61E-18  | 4.46E-14 | 1.08E-13 | 3.36E-10 | 9.32E-01 | 3.43E-01 | 6.91E-01 |
| 620.35719 | 189.94 | 11.86 | 12.23 | 12.60 | 12.93 | 5.01E-01  | 9.53E-01 | 7.21E-01 | 4.63E-01 | 9.58E-01 | 7.92E-01 | 9.71E-01 |
| 620.71172 | 54.83  | 13.84 | 10.89 | 12.54 | 12.40 | 4.54E-28  | 5.11E-15 | 3.70E-08 | 3.94E-09 | 1.84E-11 | 2.51E-09 | 9.29E-01 |
| 620.74648 | 56.75  | 15.09 | 14.36 | 16.21 | 16.05 | 3.97E-15  | 6.30E-03 | 5.42E-06 | 2.86E-04 | 2.29E-13 | 7.60E-11 | 8.88E-01 |
| 620.78549 | 46.65  | 13.10 | 15.83 | 14.81 | 15.28 | 5.14E-17  | 4.29E-14 | 1.01E-07 | 4.99E-11 | 4.15E-03 | 2.84E-01 | 4.18E-01 |
| 620.80125 | 40.21  | 14.99 | 15.71 | 16.06 | 15.34 | 6.59E-10  | 5.31E-05 | 3.70E-10 | 1.43E-01 | 1.20E-01 | 1.20E-01 | 9.36E-05 |
| 620.8257  | 45.54  | 18.20 | 19.32 | 19.17 | 19.28 | 2.24E-24  | 3.91E-14 | 4.26E-14 | 4.44E-14 | 5.56E-01 | 9.88E-01 | 7.77E-01 |
| 620.84637 | 45.8   | 17.65 | 20.61 | 20.58 | 20.45 | 1.33E-32  | 5.77E-15 | 6.00E-15 | 1.80E-14 | 9.99E-01 | 9.11E-01 | 9.56E-01 |
| 620.92943 | 65.85  | 13.32 | 15.16 | 11.34 | 12.03 | 1.00E-112 | 5.11E-15 | 5.11E-15 | 5.11E-15 | 5.11E-15 | 5.11E-15 | 1.51E-12 |
| 621.29981 | 147.39 | 19.38 | 19.07 | 19.26 | 18.89 | 6.93E-03  | 1.34E-01 | 8.35E-01 | 5.52E-03 | 5.56E-01 | 6.39E-01 | 6.70E-02 |
| 621.32782 | 193.08 | 17.80 | 16.32 | 13.91 | 15.86 | 3.80E-20  | 3.56E-04 | 3.15E-14 | 2.44E-06 | 2.39E-09 | 6.24E-01 | 3.06E-06 |
| 621.43039 | 237.5  | 15.86 | 16.75 | 17.51 | 17.56 | 2.13E-13  | 7.02E-04 | 2.70E-11 | 3.22E-11 | 6.65E-03 | 4.60E-03 | 9.96E-01 |
| 621.73691 | 58.23  | 14.01 | 11.06 | 14.68 | 14.01 | 1.02E-28  | 3.80E-14 | 8.49E-02 | 1.00E+00 | 5.33E-15 | 4.11E-14 | 1.09E-01 |
| 621.79194 | 46.35  | 13.44 | 13.22 | 12.98 | 13.58 | 1.92E-01  | 8.62E-01 | 3.46E-01 | 9.67E-01 | 8.32E-01 | 6.31E-01 | 1.80E-01 |
| 621.83092 | 43.28  | 13.43 | 14.64 | 14.10 | 14.71 | 2.10E-04  | 9.21E-04 | 1.44E-01 | 5.86E-04 | 3.34E-01 | 9.97E-01 | 2.50E-01 |
| 621.84983 | 45.42  | 13.24 | 16.69 | 16.58 | 16.55 | 1.58E-28  | 1.98E-14 | 2.71E-14 | 3.71E-14 | 9.85E-01 | 9.74E-01 | 1.00E+00 |
| 621.93231 | 37.73  | 12.47 | 16.47 | 16.59 | 15.29 | 1.19E-67  | 5.11E-15 | 5.11E-15 | 5.11E-15 | 9.13E-01 | 1.04E-08 | 2.07E-10 |
| 622.27702 | 200.81 | 17.62 | 18.03 | 18.24 | 17.72 | 9.61E-06  | 1.11E-02 | 1.58E-05 | 8.83E-01 | 3.66E-01 | 1.16E-01 | 9.04E-04 |
| 622.30056 | 162.57 | 17.59 | 16.04 | 16.07 | 16.68 | 4.01E-23  | 4.06E-14 | 4.15E-14 | 1.03E-07 | 9.97E-01 | 3.80E-04 | 7.44E-04 |
| 622.33433 | 204.4  | 20.28 | 17.76 | 18.26 | 16.60 | 7.49E-48  | 5.11E-15 | 2.91E-14 | 5.11E-15 | 4.35E-02 | 1.01E-07 | 6.49E-14 |
| 622.37321 | 189.02 | 9.88  | 12.46 | 12.71 | 12.14 | 8.48E-05  | 8.92E-04 | 1.82E-04 | 6.46E-03 | 9.84E-01 | 9.69E-01 | 8.52E-01 |
| 622.43373 | 237.45 | 13.22 | 13.09 | 14.25 | 14.38 | 4.47E-06  | 9.75E-01 | 2.36E-03 | 7.74E-04 | 7.72E-04 | 2.48E-04 | 9.75E-01 |
| 622.71957 | 58.8   | 15.82 | 12.00 | 16.11 | 16.34 | 3.49E-41  | 5.11E-15 | 7.12E-01 | 2.60E-01 | 5.11E-15 | 5.11E-15 | 8.57E-01 |
| 622.74119 | 58.75  | 12.94 | 7.17  | 10.02 | 9.65  | 8.10E-17  | 4.42E-14 | 7.44E-06 | 9.21E-07 | 2.38E-05 | 5.35E-04 | 9.33E-01 |
| 622.76262 | 65.25  | 15.26 | 11.16 | 14.80 | 14.50 | 8.53E-27  | 7.77E-15 | 5.34E-01 | 1.43E-01 | 4.09E-14 | 4.42E-14 | 8.42E-01 |
| 622.78397 | 41.72  | 20.86 | 22.50 | 22.49 | 22.32 | 6.93E-44  | 5.11E-15 | 5.11E-15 | 5.11E-15 | 1.00E+00 | 3.82E-01 | 4.11E-01 |
| 622.82415 | 44.99  | 15.73 | 14.64 | 16.17 | 16.54 | 4.71E-08  | 1.94E-03 | 4.51E-01 | 4.66E-02 | 6.89E-06 | 5.02E-08 | 6.51E-01 |
| 622.84462 | 45.31  | 14.21 | 16.72 | 17.33 | 17.15 | 4.59E-21  | 1.18E-12 | 4.32E-14 | 4.41E-14 | 2.34E-01 | 5.63E-01 | 9.51E-01 |
| 622.94643 | 62.71  | 11.17 | 13.99 | 10.00 | 10.22 | 1.86E-45  | 5.77E-15 | 2.87E-06 | 4.34E-04 | 5.11E-15 | 5.11E-15 | 7.76E-01 |
| 623.26095 | 155.74 | 18.14 | 17.63 | 18.33 | 18.34 | 5.04E-06  | 2.75E-03 | 5.43E-01 | 5.27E-01 | 2.06E-05 | 3.04E-05 | 1.00E+00 |
| 623.28033 | 201.14 | 15.27 | 14.92 | 15.40 | 14.85 | 7.16E-02  | 4.38E-01 | 9.49E-01 | 2.98E-01 | 1.92E-01 | 9.92E-01 | 1.17E-01 |
| 623.31758 | 176.21 | 15.25 | 15.21 | 16.52 | 14.29 | 3.01E-08  | 9.99E-01 | 7.96E-04 | 2.65E-02 | 7.84E-04 | 4.45E-02 | 4.38E-09 |

|           |        |       |       |       |       |          |          |          |          |          |          |          |
|-----------|--------|-------|-------|-------|-------|----------|----------|----------|----------|----------|----------|----------|
| 623.33881 | 203.39 | 17.83 | 13.87 | 14.71 | 11.95 | 1.41E-35 | 3.64E-14 | 6.47E-14 | 5.11E-15 | 1.25E-01 | 1.05E-05 | 9.97E-11 |
| 623.41705 | 183.49 | 13.04 | 13.41 | 12.44 | 11.37 | 5.13E-04 | 8.58E-01 | 5.84E-01 | 4.28E-03 | 1.88E-01 | 3.84E-04 | 1.43E-01 |
| 623.75229 | 54.39  | 14.48 | 16.00 | 16.40 | 15.91 | 1.94E-23 | 4.49E-14 | 2.22E-14 | 3.66E-13 | 1.10E-01 | 9.61E-01 | 3.72E-02 |
| 623.78707 | 48.87  | 17.02 | 18.82 | 18.87 | 18.68 | 2.77E-49 | 5.11E-15 | 5.11E-15 | 5.11E-15 | 9.63E-01 | 5.84E-01 | 3.00E-01 |
| 623.94704 | 48.01  | 11.12 | 12.82 | 12.36 | 11.19 | 5.35E-14 | 2.35E-11 | 1.02E-06 | 9.91E-01 | 2.08E-01 | 1.15E-09 | 1.52E-05 |
| 624.06685 | 22.96  | 17.32 | 17.31 | 16.62 | 16.34 | 1.76E-02 | 1.00E+00 | 2.03E-01 | 4.20E-02 | 2.43E-01 | 5.59E-02 | 8.80E-01 |
| 624.26416 | 164.33 | 16.44 | 15.71 | 16.50 | 16.52 | 7.29E-08 | 6.97E-06 | 9.78E-01 | 9.44E-01 | 1.76E-06 | 1.81E-06 | 9.98E-01 |
| 624.29296 | 214.82 | 19.01 | 16.08 | 16.54 | 15.21 | 6.01E-25 | 4.26E-14 | 1.18E-12 | 1.15E-14 | 4.82E-01 | 4.77E-02 | 4.55E-04 |
| 624.31573 | 179.7  | 13.47 | 16.46 | 17.21 | 13.27 | 7.03E-32 | 4.31E-14 | 1.51E-14 | 9.41E-01 | 1.15E-01 | 4.17E-14 | 1.58E-14 |
| 624.35285 | 199.4  | 13.49 | 14.65 | 15.39 | 14.26 | 2.07E-04 | 3.61E-02 | 6.24E-05 | 2.95E-01 | 3.16E-01 | 8.27E-01 | 5.63E-02 |
| 624.38911 | 194.45 | 13.87 | 13.54 | 13.66 | 13.07 | 2.17E-01 | 8.11E-01 | 9.40E-01 | 1.58E-01 | 9.89E-01 | 6.30E-01 | 4.31E-01 |
| 624.42505 | 189.38 | 14.34 | 13.58 | 13.94 | 13.08 | 7.51E-05 | 2.16E-02 | 4.22E-01 | 3.31E-05 | 5.31E-01 | 2.83E-01 | 1.10E-02 |
| 624.72097 | 54.43  | 18.92 | 18.67 | 19.69 | 19.37 | 3.16E-27 | 1.88E-02 | 4.24E-14 | 1.04E-06 | 7.11E-15 | 3.77E-13 | 1.74E-03 |
| 624.75289 | 53.53  | 14.54 | 15.10 | 15.48 | 15.09 | 1.11E-05 | 1.06E-02 | 2.33E-06 | 1.80E-02 | 1.87E-01 | 1.00E+00 | 1.71E-01 |
| 624.782   | 47.64  | 19.40 | 20.68 | 20.75 | 20.58 | 9.29E-42 | 5.11E-15 | 5.11E-15 | 5.11E-15 | 8.57E-01 | 7.51E-01 | 2.85E-01 |
| 624.81677 | 37.7   | 12.89 | 13.04 | 12.92 | 13.00 | 9.46E-01 | 9.47E-01 | 1.00E+00 | 9.82E-01 | 9.71E-01 | 9.99E-01 | 9.93E-01 |
| 624.83528 | 44.6   | 14.83 | 16.24 | 16.64 | 16.76 | 6.37E-22 | 1.12E-11 | 4.37E-14 | 4.13E-14 | 1.78E-01 | 4.93E-02 | 9.22E-01 |
| 624.95764 | 145.71 | 8.26  | 7.98  | 8.82  | 11.89 | 2.70E-29 | 7.86E-01 | 2.40E-01 | 9.55E-15 | 3.33E-02 | 5.77E-15 | 4.25E-14 |
| 625.06858 | 24.03  | 14.15 | 13.49 | 14.09 | 13.91 | 4.90E-01 | 4.74E-01 | 9.99E-01 | 9.57E-01 | 5.72E-01 | 8.18E-01 | 9.82E-01 |
| 625.1878  | 54.01  | 11.61 | 18.86 | 11.31 | 11.03 | 1.59E-70 | 5.11E-15 | 7.69E-01 | 2.85E-01 | 5.11E-15 | 5.11E-15 | 8.39E-01 |
| 625.27418 | 161.03 | 16.17 | 15.33 | 15.67 | 15.37 | 3.64E-07 | 1.33E-06 | 8.60E-03 | 9.59E-06 | 1.45E-01 | 9.93E-01 | 2.72E-01 |
| 625.29647 | 198.53 | 16.69 | 14.00 | 14.42 | 13.46 | 1.75E-37 | 5.11E-15 | 3.13E-14 | 5.11E-15 | 1.92E-01 | 8.08E-02 | 1.14E-04 |
| 625.32024 | 168.2  | 9.45  | 13.63 | 14.64 | 10.33 | 3.28E-32 | 4.13E-14 | 5.33E-15 | 1.55E-01 | 7.81E-02 | 4.78E-12 | 4.35E-14 |
| 625.33645 | 175.73 | 14.50 | 11.04 | 13.78 | 13.10 | 5.82E-24 | 1.09E-14 | 7.35E-02 | 4.51E-05 | 4.32E-14 | 1.59E-09 | 1.29E-01 |
| 625.72492 | 62.87  | 14.91 | 12.38 | 16.11 | 15.58 | 6.80E-42 | 1.38E-14 | 4.60E-07 | 1.50E-02 | 5.11E-15 | 5.11E-15 | 9.95E-02 |
| 625.75717 | 53.44  | 12.83 | 14.09 | 13.77 | 14.06 | 5.87E-06 | 2.44E-05 | 2.74E-03 | 6.86E-05 | 6.32E-01 | 9.99E-01 | 7.20E-01 |
| 625.7847  | 50.11  | 14.66 | 15.78 | 15.75 | 15.64 | 3.22E-26 | 3.02E-14 | 3.40E-14 | 4.21E-14 | 9.93E-01 | 5.81E-01 | 7.38E-01 |
| 625.79887 | 45.13  | 12.38 | 17.53 | 16.76 | 16.87 | 1.24E-30 | 5.33E-15 | 3.26E-14 | 3.33E-14 | 2.49E-01 | 4.21E-01 | 9.93E-01 |
| 625.87595 | 35.5   | 11.03 | 13.23 | 12.52 | 12.34 | 1.29E-03 | 5.38E-04 | 3.62E-02 | 9.95E-02 | 5.83E-01 | 4.22E-01 | 9.90E-01 |
| 626.08494 | 24.21  | 16.05 | 15.83 | 16.32 | 15.67 | 1.37E-01 | 8.65E-01 | 7.50E-01 | 5.54E-01 | 3.10E-01 | 9.48E-01 | 1.17E-01 |
| 626.18914 | 63.81  | 11.24 | 13.51 | 9.71  | 10.33 | 4.01E-77 | 5.11E-15 | 8.88E-15 | 5.03E-10 | 5.11E-15 | 5.11E-15 | 4.86E-05 |
| 626.34702 | 207.61 | 21.14 | 21.25 | 21.54 | 21.21 | 1.19E-02 | 8.33E-01 | 8.81E-03 | 9.56E-01 | 1.09E-01 | 9.90E-01 | 6.00E-02 |
| 626.65807 | 72.05  | 11.60 | 10.89 | 11.24 | 11.01 | 5.26E-02 | 4.55E-02 | 5.35E-01 | 1.46E-01 | 5.85E-01 | 9.76E-01 | 8.45E-01 |
| 626.68213 | 67.96  | 10.49 | 10.35 | 11.90 | 10.74 | 2.76E-02 | 9.93E-01 | 5.25E-02 | 9.72E-01 | 3.20E-02 | 9.05E-01 | 1.90E-01 |
| 626.71903 | 64.9   | 17.13 | 16.53 | 17.81 | 17.44 | 8.02E-31 | 1.08E-09 | 4.53E-12 | 4.65E-03 | 5.11E-15 | 4.37E-14 | 7.45E-04 |
| 626.73646 | 54.13  | 19.59 | 19.83 | 20.51 | 20.22 | 2.80E-31 | 2.38E-03 | 5.11E-15 | 4.26E-14 | 4.32E-14 | 9.94E-07 | 6.28E-04 |
| 626.77838 | 45.64  | 14.81 | 14.16 | 14.40 | 14.50 | 1.31E-06 | 2.72E-07 | 2.24E-03 | 4.80E-02 | 1.69E-01 | 2.55E-02 | 8.30E-01 |
| 626.79519 | 46.34  | 17.00 | 18.90 | 19.04 | 18.97 | 1.56E-53 | 5.11E-15 | 5.11E-15 | 5.11E-15 | 6.11E-01 | 9.49E-01 | 9.15E-01 |
| 626.81213 | 38.52  | 13.12 | 13.95 | 14.69 | 14.70 | 3.59E-09 | 1.06E-02 | 5.76E-08 | 1.33E-07 | 3.48E-02 | 3.92E-02 | 1.00E+00 |
| 626.83053 | 36.63  | 12.67 | 11.90 | 12.68 | 12.50 | 1.37E-01 | 1.58E-01 | 1.00E+00 | 9.68E-01 | 1.69E-01 | 4.13E-01 | 9.69E-01 |
| 626.85413 | 43.7   | 15.56 | 14.47 | 14.10 | 15.06 | 1.30E-03 | 2.64E-02 | 1.02E-03 | 5.84E-01 | 7.87E-01 | 4.74E-01 | 8.68E-02 |
| 626.99956 | 52.76  | 12.52 | 13.32 | 10.53 | 11.19 | 1.51E-74 | 1.56E-12 | 5.11E-15 | 5.33E-15 | 5.11E-15 | 5.11E-15 | 2.15E-08 |
| 627.1239  | 67.66  | 11.84 | 12.76 | 10.00 | 10.58 | 4.07E-66 | 2.09E-13 | 5.11E-15 | 3.24E-14 | 5.11E-15 | 5.11E-15 | 1.23E-05 |
| 627.29274 | 170.08 | 13.29 | 11.26 | 11.14 | 11.53 | 4.69E-09 | 4.13E-07 | 5.08E-08 | 2.52E-05 | 9.86E-01 | 8.95E-01 | 7.23E-01 |
| 627.35041 | 203.49 | 19.55 | 19.59 | 19.94 | 19.59 | 1.27E-02 | 9.91E-01 | 1.60E-02 | 9.92E-01 | 4.67E-02 | 1.00E+00 | 5.45E-02 |



|           |        |       |       |       |       |          |          |          |          |          |          |          |
|-----------|--------|-------|-------|-------|-------|----------|----------|----------|----------|----------|----------|----------|
| 627.73885 | 60.27  | 15.32 | 13.42 | 16.19 | 15.92 | 1.71E-28 | 4.61E-14 | 3.82E-04 | 3.77E-02 | 5.33E-15 | 3.02E-14 | 6.22E-01 |
| 627.77644 | 39.83  | 14.91 | 16.03 | 15.51 | 15.38 | 7.08E-09 | 7.54E-10 | 1.90E-03 | 3.46E-02 | 1.23E-02 | 1.28E-03 | 8.66E-01 |
| 627.80121 | 39.76  | 13.92 | 13.10 | 13.08 | 13.74 | 9.10E-07 | 5.48E-05 | 2.64E-05 | 7.66E-01 | 9.99E-01 | 5.10E-03 | 3.11E-03 |
| 628.17677 | 18.48  | 10.94 | 13.39 | 13.17 | 11.96 | 3.72E-16 | 8.17E-14 | 2.60E-12 | 4.51E-03 | 8.86E-01 | 3.46E-05 | 5.53E-04 |
| 628.32606 | 185.5  | 16.24 | 16.44 | 16.40 | 16.55 | 5.56E-01 | 7.86E-01 | 8.82E-01 | 4.86E-01 | 9.97E-01 | 9.59E-01 | 8.97E-01 |
| 628.35843 | 216.53 | 19.51 | 19.65 | 19.70 | 19.17 | 2.87E-02 | 8.69E-01 | 7.30E-01 | 2.43E-01 | 9.94E-01 | 5.55E-02 | 2.72E-02 |
| 628.67537 | 61.71  | 13.28 | 11.13 | 12.27 | 12.44 | 9.31E-17 | 4.43E-14 | 3.46E-05 | 1.36E-03 | 5.30E-06 | 3.40E-07 | 8.83E-01 |
| 628.73339 | 46.91  | 18.57 | 18.25 | 19.18 | 18.99 | 3.04E-23 | 6.90E-04 | 2.72E-11 | 1.48E-05 | 2.91E-14 | 7.37E-14 | 1.29E-01 |
| 628.77044 | 37.48  | 13.77 | 14.18 | 13.37 | 14.01 | 9.65E-04 | 1.76E-01 | 1.89E-01 | 6.57E-01 | 6.10E-04 | 8.48E-01 | 1.45E-02 |
| 628.79223 | 47.1   | 15.61 | 16.51 | 16.89 | 16.76 | 1.32E-27 | 6.63E-14 | 6.88E-15 | 3.91E-14 | 3.52E-03 | 1.31E-01 | 6.39E-01 |
| 628.81256 | 43.32  | 17.97 | 18.93 | 18.47 | 18.85 | 2.88E-11 | 2.70E-10 | 1.77E-03 | 1.24E-08 | 7.51E-03 | 9.61E-01 | 4.10E-02 |
| 628.83268 | 47.33  | 14.18 | 15.87 | 16.50 | 16.01 | 4.99E-19 | 8.12E-11 | 4.44E-14 | 8.92E-12 | 4.99E-02 | 9.50E-01 | 1.97E-01 |
| 628.84054 | 37.24  | 13.00 | 13.38 | 12.81 | 12.57 | 2.56E-02 | 4.63E-01 | 8.67E-01 | 3.51E-01 | 1.32E-01 | 1.61E-02 | 8.10E-01 |
| 628.95431 | 55.55  | 11.64 | 18.80 | 11.31 | 11.08 | 2.78E-66 | 5.11E-15 | 7.41E-01 | 3.68E-01 | 5.11E-15 | 5.11E-15 | 9.22E-01 |
| 629.13577 | 18.06  | 17.32 | 18.44 | 18.56 | 18.38 | 2.43E-14 | 1.78E-10 | 1.43E-12 | 3.30E-09 | 8.90E-01 | 9.88E-01 | 7.34E-01 |
| 629.32915 | 170.76 | 13.78 | 13.81 | 14.15 | 14.28 | 3.55E-01 | 1.00E+00 | 6.64E-01 | 4.30E-01 | 7.40E-01 | 5.09E-01 | 9.77E-01 |
| 629.36626 | 215.18 | 17.65 | 17.87 | 17.68 | 17.13 | 1.64E-03 | 6.11E-01 | 9.98E-01 | 2.97E-02 | 7.31E-01 | 8.23E-04 | 2.15E-02 |
| 629.4556  | 234.01 | 19.60 | 17.95 | 18.74 | 19.47 | 4.08E-20 | 4.35E-14 | 2.70E-06 | 8.76E-01 | 3.53E-05 | 5.08E-14 | 2.36E-04 |
| 629.72408 | 57.95  | 13.48 | 10.63 | 12.98 | 12.52 | 3.65E-20 | 4.04E-14 | 2.58E-01 | 4.34E-03 | 8.06E-14 | 2.74E-09 | 3.81E-01 |
| 629.73793 | 61.04  | 14.04 | 11.41 | 12.71 | 13.14 | 4.69E-26 | 5.33E-15 | 3.17E-09 | 1.92E-04 | 2.08E-08 | 6.75E-13 | 1.92E-01 |
| 629.77668 | 48.91  | 12.99 | 12.85 | 12.93 | 13.12 | 7.11E-01 | 9.17E-01 | 9.94E-01 | 9.45E-01 | 9.81E-01 | 6.57E-01 | 8.57E-01 |
| 629.96543 | 60.3   | 11.01 | 15.30 | 10.39 | 10.61 | 3.65E-52 | 5.11E-15 | 7.70E-02 | 4.33E-01 | 5.11E-15 | 5.11E-15 | 8.51E-01 |
| 630.11872 | 18.18  | 14.48 | 14.80 | 13.30 | 13.81 | 6.92E-05 | 7.69E-01 | 2.39E-03 | 2.12E-01 | 9.08E-05 | 2.76E-02 | 4.52E-01 |
| 630.13748 | 17.8   | 14.61 | 15.67 | 15.60 | 16.07 | 5.72E-10 | 5.08E-06 | 1.96E-05 | 5.06E-10 | 9.87E-01 | 2.60E-01 | 1.33E-01 |
| 630.24324 | 173.39 | 12.74 | 11.69 | 13.06 | 13.01 | 2.82E-03 | 3.94E-02 | 8.42E-01 | 9.13E-01 | 4.02E-03 | 9.10E-03 | 9.99E-01 |
| 630.30288 | 190.71 | 15.34 | 14.83 | 14.92 | 15.07 | 9.63E-02 | 8.41E-02 | 2.05E-01 | 6.06E-01 | 9.74E-01 | 7.17E-01 | 9.15E-01 |
| 630.34201 | 199.99 | 14.84 | 14.76 | 14.22 | 14.20 | 1.48E-01 | 9.96E-01 | 2.80E-01 | 2.85E-01 | 4.31E-01 | 4.32E-01 | 1.00E+00 |
| 630.37921 | 233.99 | 18.95 | 14.13 | 11.08 | 14.80 | 1.66E-42 | 3.02E-14 | 5.11E-15 | 4.30E-14 | 6.72E-10 | 4.82E-01 | 3.52E-13 |
| 630.45921 | 233.99 | 17.95 | 15.97 | 16.94 | 17.86 | 6.00E-16 | 6.52E-14 | 1.15E-04 | 9.82E-01 | 3.66E-04 | 3.09E-12 | 1.20E-03 |
| 630.66983 | 70.07  | 12.45 | 10.14 | 11.88 | 12.08 | 1.46E-12 | 2.02E-12 | 2.19E-01 | 6.24E-01 | 2.01E-07 | 1.87E-08 | 9.17E-01 |
| 630.72964 | 55.56  | 16.14 | 14.78 | 15.97 | 16.13 | 2.74E-17 | 4.86E-14 | 6.85E-01 | 1.00E+00 | 1.30E-11 | 1.77E-13 | 7.55E-01 |
| 630.75344 | 47.25  | 15.17 | 11.04 | 12.05 | 12.78 | 1.05E-13 | 1.21E-13 | 8.98E-09 | 3.19E-05 | 1.98E-01 | 6.02E-03 | 4.99E-01 |
| 630.77065 | 54.96  | 17.84 | 17.88 | 18.94 | 18.78 | 8.99E-25 | 9.83E-01 | 4.32E-14 | 2.13E-13 | 4.44E-14 | 5.86E-12 | 5.16E-01 |
| 630.78975 | 51.74  | 12.48 | 12.72 | 13.51 | 13.66 | 4.39E-03 | 9.19E-01 | 2.97E-02 | 1.28E-02 | 1.65E-01 | 8.40E-02 | 9.82E-01 |
| 630.81037 | 49.27  | 15.28 | 14.48 | 14.34 | 15.18 | 5.21E-04 | 1.58E-02 | 2.41E-03 | 9.81E-01 | 9.51E-01 | 6.66E-02 | 1.51E-02 |
| 630.82864 | 41.48  | 17.10 | 19.99 | 19.54 | 19.55 | 6.52E-26 | 1.60E-14 | 4.14E-14 | 4.37E-14 | 3.00E-01 | 3.45E-01 | 1.00E+00 |
| 631.14043 | 22.55  | 18.26 | 18.77 | 18.61 | 17.90 | 3.89E-02 | 3.41E-01 | 6.46E-01 | 6.63E-01 | 9.59E-01 | 3.74E-02 | 1.18E-01 |
| 631.34554 | 182.89 | 8.71  | 12.20 | 10.88 | 9.28  | 4.28E-07 | 6.95E-07 | 3.94E-03 | 8.20E-01 | 1.78E-01 | 1.24E-04 | 8.05E-02 |
| 631.38284 | 224.53 | 16.84 | 11.82 | 11.14 | 11.86 | 1.94E-62 | 5.11E-15 | 5.11E-15 | 5.11E-15 | 5.59E-02 | 9.99E-01 | 4.90E-02 |
| 631.39078 | 134.57 | 13.87 | 9.15  | 9.46  | 10.70 | 5.64E-16 | 7.73E-14 | 7.51E-13 | 6.19E-07 | 9.48E-01 | 4.73E-02 | 1.56E-01 |
| 631.47315 | 232.83 | 19.57 | 18.96 | 19.81 | 19.83 | 1.61E-10 | 1.93E-05 | 2.48E-01 | 2.13E-01 | 3.40E-09 | 5.03E-09 | 9.99E-01 |
| 631.7394  | 56.16  | 14.87 | 15.29 | 16.52 | 16.14 | 1.72E-29 | 9.97E-03 | 5.33E-15 | 4.43E-14 | 4.33E-14 | 2.84E-08 | 3.08E-02 |
| 631.7728  | 55.01  | 13.69 | 13.10 | 13.60 | 13.60 | 8.45E-02 | 7.94E-02 | 9.84E-01 | 9.84E-01 | 1.90E-01 | 2.20E-01 | 1.00E+00 |
| 631.8316  | 42.13  | 12.48 | 15.12 | 14.10 | 14.37 | 6.28E-08 | 2.29E-08 | 1.05E-03 | 1.49E-04 | 9.62E-02 | 3.61E-01 | 9.27E-01 |
| 631.86771 | 36.77  | 13.91 | 15.35 | 15.77 | 14.70 | 2.08E-08 | 2.36E-05 | 1.79E-08 | 5.80E-02 | 5.21E-01 | 1.82E-01 | 4.80E-03 |

|           |        |       |       |       |       |          |          |          |          |          |          |          |
|-----------|--------|-------|-------|-------|-------|----------|----------|----------|----------|----------|----------|----------|
| 632.14324 | 23.21  | 15.05 | 14.93 | 14.30 | 13.79 | 2.93E-02 | 9.93E-01 | 3.35E-01 | 3.46E-02 | 5.24E-01 | 8.19E-02 | 7.02E-01 |
| 632.17371 | 77.39  | 9.27  | 5.11  | 5.42  | 13.85 | 7.60E-25 | 7.43E-07 | 4.05E-06 | 9.02E-08 | 9.80E-01 | 3.02E-14 | 3.84E-14 |
| 632.31894 | 207.49 | 19.87 | 20.42 | 20.14 | 20.38 | 3.15E-05 | 6.94E-05 | 1.29E-01 | 4.15E-04 | 1.09E-01 | 9.89E-01 | 2.32E-01 |
| 632.35757 | 204.84 | 17.53 | 18.82 | 19.02 | 18.44 | 4.01E-15 | 3.95E-11 | 6.91E-14 | 8.16E-06 | 6.96E-01 | 1.72E-01 | 1.05E-02 |
| 632.47693 | 231.56 | 17.87 | 17.57 | 18.53 | 18.53 | 2.61E-07 | 3.85E-01 | 2.69E-03 | 4.29E-03 | 6.92E-06 | 1.55E-05 | 1.00E+00 |
| 632.68662 | 71.11  | 13.82 | 11.54 | 12.89 | 12.71 | 1.52E-10 | 1.15E-11 | 1.24E-02 | 2.56E-03 | 1.34E-04 | 2.09E-03 | 9.39E-01 |
| 632.70907 | 65.35  | 12.58 | 7.45  | 13.06 | 13.13 | 1.30E-37 | 5.11E-15 | 6.04E-01 | 5.21E-01 | 5.11E-15 | 5.11E-15 | 9.98E-01 |
| 632.72879 | 55.73  | 17.27 | 17.20 | 18.59 | 18.31 | 1.85E-21 | 9.66E-01 | 4.34E-14 | 9.48E-10 | 4.29E-14 | 2.12E-10 | 2.73E-01 |
| 632.76604 | 44.87  | 17.57 | 17.29 | 17.92 | 17.86 | 1.28E-13 | 2.99E-03 | 9.55E-05 | 2.11E-03 | 2.42E-12 | 4.49E-10 | 9.22E-01 |
| 632.81962 | 40.78  | 14.92 | 16.86 | 16.49 | 16.35 | 1.06E-09 | 2.12E-09 | 1.25E-06 | 2.48E-05 | 6.04E-01 | 3.59E-01 | 9.70E-01 |
| 632.89991 | 44.99  | 13.86 | 12.79 | 13.45 | 13.66 | 1.69E-02 | 1.08E-02 | 6.31E-01 | 9.46E-01 | 2.30E-01 | 7.51E-02 | 9.35E-01 |
| 633.10996 | 66.75  | 11.64 | 13.30 | 9.69  | 10.52 | 4.61E-49 | 4.26E-14 | 3.42E-14 | 7.11E-08 | 5.11E-15 | 5.11E-15 | 1.13E-04 |
| 633.12693 | 129.24 | 10.40 | 13.15 | 13.15 | 13.76 | 3.37E-15 | 3.93E-10 | 2.77E-10 | 1.85E-13 | 1.00E+00 | 4.74E-01 | 4.64E-01 |
| 633.12711 | 29.2   | 17.12 | 19.06 | 18.66 | 19.22 | 1.88E-22 | 4.32E-14 | 2.64E-12 | 4.06E-14 | 2.02E-01 | 8.80E-01 | 4.05E-02 |
| 633.32222 | 212.29 | 17.97 | 18.43 | 18.09 | 18.40 | 1.23E-02 | 2.52E-02 | 8.82E-01 | 5.48E-02 | 1.67E-01 | 9.97E-01 | 2.73E-01 |
| 633.36104 | 207.03 | 15.52 | 16.54 | 16.83 | 16.24 | 5.99E-07 | 1.33E-04 | 3.43E-07 | 1.66E-02 | 6.19E-01 | 6.26E-01 | 8.09E-02 |
| 633.5105  | 240.04 | 19.85 | 20.00 | 20.16 | 20.09 | 7.85E-01 | 9.67E-01 | 7.55E-01 | 8.85E-01 | 9.57E-01 | 9.93E-01 | 9.96E-01 |
| 633.7173  | 62     | 12.63 | 10.42 | 12.95 | 11.95 | 8.24E-27 | 3.42E-14 | 3.85E-01 | 8.86E-03 | 7.33E-15 | 1.29E-10 | 3.60E-05 |
| 633.73872 | 57.37  | 14.18 | 13.29 | 14.90 | 14.72 | 1.23E-10 | 7.28E-04 | 8.94E-03 | 1.01E-01 | 2.99E-10 | 6.67E-08 | 8.73E-01 |
| 633.78555 | 46.57  | 14.42 | 17.86 | 17.37 | 17.25 | 6.55E-37 | 5.11E-15 | 5.33E-15 | 1.15E-14 | 1.88E-01 | 7.19E-02 | 9.58E-01 |
| 633.80661 | 40.1   | 15.93 | 15.75 | 16.08 | 15.20 | 1.13E-02 | 9.02E-01 | 9.43E-01 | 3.46E-02 | 6.14E-01 | 1.91E-01 | 8.27E-03 |
| 633.88974 | 54.49  | 11.84 | 12.45 | 14.65 | 14.07 | 1.59E-22 | 1.20E-01 | 3.93E-14 | 7.91E-13 | 1.11E-12 | 4.05E-07 | 1.82E-01 |
| 634.13048 | 20.63  | 13.38 | 15.50 | 15.12 | 16.59 | 1.87E-13 | 2.65E-07 | 2.90E-05 | 8.86E-14 | 7.44E-01 | 3.21E-02 | 1.23E-03 |
| 634.28718 | 47.16  | 12.64 | 13.45 | 13.06 | 13.11 | 4.41E-05 | 9.04E-06 | 5.41E-02 | 3.04E-02 | 8.79E-02 | 1.96E-01 | 9.91E-01 |
| 634.33328 | 200.31 | 17.02 | 15.78 | 16.68 | 15.11 | 1.66E-17 | 3.38E-08 | 3.43E-01 | 4.26E-14 | 1.35E-04 | 1.26E-02 | 2.74E-11 |
| 634.37322 | 191.47 | 12.00 | 13.35 | 14.69 | 13.03 | 2.65E-05 | 5.86E-02 | 5.23E-06 | 2.42E-01 | 7.32E-02 | 9.40E-01 | 1.81E-02 |
| 634.49304 | 242.72 | 16.76 | 16.88 | 17.61 | 17.30 | 4.89E-03 | 9.71E-01 | 5.81E-03 | 1.82E-01 | 2.92E-02 | 4.08E-01 | 6.56E-01 |
| 634.51446 | 240.24 | 18.03 | 18.53 | 18.64 | 18.63 | 1.88E-01 | 4.11E-01 | 2.27E-01 | 2.67E-01 | 9.87E-01 | 9.90E-01 | 1.00E+00 |
| 634.70557 | 73.83  | 14.52 | 11.92 | 14.01 | 13.29 | 2.83E-20 | 4.00E-14 | 1.71E-01 | 1.61E-05 | 1.41E-13 | 2.61E-06 | 3.00E-02 |
| 634.72718 | 56.32  | 16.08 | 15.87 | 17.30 | 17.02 | 3.65E-19 | 5.64E-01 | 1.47E-12 | 1.26E-07 | 4.40E-14 | 3.48E-10 | 3.33E-01 |
| 634.75544 | 50.03  | 14.80 | 13.64 | 14.55 | 14.31 | 1.12E-08 | 4.59E-09 | 5.12E-01 | 4.21E-02 | 8.25E-06 | 2.95E-03 | 5.68E-01 |
| 634.76439 | 47.74  | 13.54 | 12.51 | 12.93 | 13.45 | 4.71E-03 | 5.94E-03 | 1.97E-01 | 9.91E-01 | 5.52E-01 | 2.44E-02 | 3.87E-01 |
| 634.78582 | 46.47  | 13.74 | 16.82 | 16.25 | 16.24 | 5.63E-29 | 5.33E-15 | 4.26E-14 | 4.42E-14 | 9.96E-02 | 1.12E-01 | 1.00E+00 |
| 634.8173  | 35.82  | 11.98 | 12.63 | 13.17 | 12.70 | 1.18E-02 | 2.64E-01 | 4.93E-03 | 2.01E-01 | 4.51E-01 | 9.98E-01 | 5.94E-01 |
| 634.84095 | 43.43  | 15.34 | 15.88 | 15.93 | 16.09 | 1.64E-02 | 1.22E-01 | 6.94E-02 | 1.57E-02 | 9.96E-01 | 8.44E-01 | 9.26E-01 |
| 634.86202 | 39.47  | 16.77 | 19.24 | 19.29 | 19.25 | 1.49E-28 | 2.91E-14 | 1.98E-14 | 3.35E-14 | 9.98E-01 | 1.00E+00 | 9.99E-01 |
| 634.96543 | 59.33  | 11.65 | 15.15 | 9.85  | 10.57 | 1.42E-80 | 5.11E-15 | 3.89E-14 | 5.16E-08 | 5.11E-15 | 5.11E-15 | 7.07E-04 |
| 635.01468 | 23.4   | 10.93 | 11.92 | 12.23 | 11.69 | 7.49E-10 | 3.13E-06 | 3.75E-10 | 8.54E-04 | 3.75E-01 | 6.61E-01 | 3.47E-02 |
| 635.22233 | 163.74 | 13.37 | 13.24 | 14.11 | 12.84 | 5.05E-04 | 9.71E-01 | 5.02E-02 | 2.72E-01 | 1.86E-02 | 5.38E-01 | 2.05E-04 |
| 635.33795 | 190.11 | 14.58 | 12.73 | 13.92 | 12.29 | 1.11E-09 | 2.64E-06 | 2.39E-01 | 1.05E-08 | 6.68E-03 | 6.41E-01 | 1.06E-04 |
| 635.52518 | 249.47 | 20.18 | 19.52 | 19.49 | 19.82 | 3.11E-02 | 5.82E-02 | 4.08E-02 | 5.43E-01 | 1.00E+00 | 6.89E-01 | 6.17E-01 |
| 635.76169 | 50.83  | 12.34 | 15.32 | 14.30 | 14.06 | 6.38E-14 | 5.44E-14 | 2.08E-07 | 1.44E-05 | 2.46E-02 | 4.16E-03 | 9.09E-01 |
| 635.78954 | 39.21  | 12.42 | 13.01 | 12.75 | 13.65 | 3.83E-11 | 1.44E-03 | 1.50E-01 | 7.91E-12 | 3.88E-01 | 1.08E-03 | 1.15E-06 |
| 635.83606 | 39.91  | 13.76 | 14.77 | 14.11 | 14.85 | 4.05E-04 | 3.05E-03 | 6.17E-01 | 1.59E-03 | 1.12E-01 | 9.93E-01 | 6.78E-02 |
| 635.86367 | 38.57  | 12.68 | 12.43 | 12.41 | 12.61 | 5.72E-01 | 6.87E-01 | 6.26E-01 | 9.90E-01 | 1.00E+00 | 8.79E-01 | 8.38E-01 |

|           |        |       |       |       |       |           |          |          |          |          |          |          |
|-----------|--------|-------|-------|-------|-------|-----------|----------|----------|----------|----------|----------|----------|
| 635.914   | 60.16  | 15.60 | 12.22 | 15.71 | 16.00 | 2.73E-44  | 5.11E-15 | 9.59E-01 | 3.14E-01 | 5.11E-15 | 5.11E-15 | 6.17E-01 |
| 636.29265 | 200.33 | 15.54 | 14.66 | 15.17 | 14.60 | 7.21E-04  | 3.42E-03 | 4.70E-01 | 2.20E-03 | 1.92E-01 | 9.97E-01 | 1.38E-01 |
| 636.35066 | 212.32 | 18.53 | 19.93 | 19.02 | 19.71 | 3.27E-11  | 2.23E-10 | 6.48E-02 | 2.21E-07 | 9.36E-05 | 7.18E-01 | 7.42E-03 |
| 636.38879 | 193.27 | 12.98 | 14.95 | 15.24 | 12.97 | 5.94E-10  | 1.50E-05 | 3.80E-07 | 1.00E+00 | 8.96E-01 | 4.13E-05 | 1.47E-06 |
| 636.52568 | 250.54 | 18.80 | 18.01 | 18.10 | 18.48 | 1.93E-02  | 2.43E-02 | 5.50E-02 | 6.70E-01 | 9.89E-01 | 3.78E-01 | 5.60E-01 |
| 636.72518 | 49.73  | 14.37 | 11.40 | 12.51 | 13.02 | 6.94E-25  | 6.00E-15 | 1.77E-12 | 7.70E-07 | 6.68E-05 | 7.82E-09 | 1.88E-01 |
| 636.75996 | 48.65  | 13.99 | 15.21 | 14.10 | 14.77 | 3.39E-06  | 1.25E-05 | 9.72E-01 | 1.49E-02 | 1.23E-04 | 3.37E-01 | 5.55E-02 |
| 636.77559 | 42.82  | 15.11 | 15.64 | 15.96 | 15.42 | 9.33E-09  | 3.76E-04 | 2.38E-09 | 9.57E-02 | 8.60E-02 | 3.81E-01 | 6.66E-04 |
| 636.79947 | 48.83  | 18.56 | 19.19 | 19.20 | 19.24 | 3.79E-16  | 8.53E-12 | 4.26E-12 | 8.35E-13 | 1.00E+00 | 9.44E-01 | 9.53E-01 |
| 636.82041 | 47.14  | 18.55 | 21.16 | 21.24 | 21.03 | 5.50E-41  | 5.11E-15 | 5.11E-15 | 5.11E-15 | 9.74E-01 | 9.01E-01 | 6.81E-01 |
| 636.83792 | 19.31  | 12.33 | 9.42  | 8.92  | 15.83 | 3.37E-36  | 7.20E-09 | 9.42E-12 | 1.36E-11 | 7.17E-01 | 5.11E-15 | 5.11E-15 |
| 636.85923 | 41.74  | 14.16 | 15.65 | 15.13 | 15.99 | 2.44E-08  | 6.00E-06 | 5.53E-03 | 3.72E-08 | 3.29E-01 | 6.81E-01 | 3.01E-02 |
| 636.89932 | 64.94  | 10.67 | 15.56 | 9.26  | 9.69  | 1.75E-126 | 5.11E-15 | 1.62E-14 | 3.10E-12 | 5.11E-15 | 5.11E-15 | 6.98E-03 |
| 636.90888 | 58.78  | 13.39 | 15.06 | 11.42 | 12.12 | 1.31E-94  | 5.11E-15 | 5.11E-15 | 5.77E-15 | 5.11E-15 | 5.11E-15 | 1.53E-09 |
| 637.27686 | 165.54 | 14.14 | 11.59 | 11.72 | 12.66 | 1.53E-21  | 4.34E-14 | 4.31E-14 | 2.78E-07 | 9.51E-01 | 5.20E-04 | 3.12E-03 |
| 637.35392 | 206.48 | 16.85 | 17.51 | 16.40 | 17.89 | 4.85E-11  | 7.60E-03 | 1.16E-01 | 9.38E-06 | 1.35E-06 | 3.09E-01 | 2.29E-10 |
| 637.37289 | 185.75 | 13.33 | 15.74 | 16.40 | 14.02 | 2.26E-17  | 3.45E-10 | 4.37E-14 | 2.20E-01 | 2.57E-01 | 3.25E-05 | 3.27E-09 |
| 637.39506 | 176    | 11.90 | 12.32 | 12.70 | 10.89 | 1.09E-04  | 6.82E-01 | 1.44E-01 | 5.31E-02 | 7.58E-01 | 2.63E-03 | 5.40E-05 |
| 637.53973 | 262.81 | 19.05 | 19.02 | 18.91 | 19.33 | 6.24E-01  | 1.00E+00 | 9.71E-01 | 8.08E-01 | 9.85E-01 | 7.80E-01 | 5.66E-01 |
| 637.76777 | 53.5   | 12.57 | 12.66 | 12.95 | 13.22 | 1.84E-01  | 9.91E-01 | 6.02E-01 | 1.81E-01 | 7.95E-01 | 3.28E-01 | 8.48E-01 |
| 637.80528 | 45.44  | 14.82 | 16.20 | 15.32 | 15.99 | 2.76E-11  | 1.96E-10 | 5.13E-02 | 1.52E-07 | 1.24E-04 | 7.48E-01 | 7.78E-03 |
| 637.82414 | 41.07  | 14.45 | 17.27 | 17.32 | 17.16 | 2.51E-34  | 5.33E-15 | 5.11E-15 | 1.02E-14 | 9.96E-01 | 9.60E-01 | 8.94E-01 |
| 637.90652 | 33.75  | 11.52 | 13.43 | 13.66 | 13.06 | 1.28E-09  | 2.75E-07 | 5.24E-09 | 8.22E-05 | 9.07E-01 | 7.23E-01 | 3.20E-01 |
| 638.30872 | 201.83 | 18.16 | 13.19 | 14.99 | 11.70 | 1.07E-44  | 5.11E-15 | 4.26E-14 | 5.11E-15 | 8.82E-06 | 5.93E-04 | 4.53E-14 |
| 638.33272 | 176.82 | 12.38 | 15.22 | 15.84 | 11.28 | 7.10E-25  | 4.75E-10 | 7.68E-14 | 5.17E-02 | 4.65E-01 | 4.40E-14 | 3.92E-14 |
| 638.36933 | 192.62 | 11.65 | 15.04 | 16.02 | 12.50 | 7.37E-14  | 7.49E-08 | 2.92E-12 | 4.69E-01 | 3.42E-01 | 2.29E-04 | 9.98E-08 |
| 638.54546 | 265.53 | 16.48 | 16.55 | 16.66 | 17.17 | 4.50E-01  | 9.98E-01 | 9.78E-01 | 4.24E-01 | 9.96E-01 | 5.47E-01 | 6.81E-01 |
| 638.73299 | 69.37  | 15.98 | 13.92 | 16.07 | 15.88 | 1.23E-45  | 5.11E-15 | 9.01E-01 | 8.59E-01 | 5.11E-15 | 5.11E-15 | 4.83E-01 |
| 638.75793 | 52.13  | 20.93 | 22.04 | 22.35 | 22.12 | 3.08E-50  | 5.11E-15 | 5.11E-15 | 5.11E-15 | 4.26E-04 | 7.07E-01 | 2.38E-02 |
| 638.77833 | 42.58  | 14.05 | 13.78 | 13.19 | 13.76 | 7.66E-03  | 7.04E-01 | 3.48E-03 | 6.79E-01 | 9.79E-02 | 1.00E+00 | 1.29E-01 |
| 638.79777 | 49.19  | 16.54 | 17.01 | 17.02 | 17.14 | 2.00E-07  | 7.27E-05 | 4.84E-05 | 5.84E-07 | 1.00E+00 | 6.75E-01 | 7.00E-01 |
| 638.81941 | 46.18  | 15.87 | 18.64 | 18.83 | 18.62 | 2.42E-37  | 5.11E-15 | 5.11E-15 | 5.33E-15 | 8.27E-01 | 1.00E+00 | 7.99E-01 |
| 638.90031 | 69.12  | 11.90 | 12.62 | 9.99  | 10.56 | 8.94E-64  | 5.47E-09 | 5.11E-15 | 1.64E-14 | 5.11E-15 | 5.11E-15 | 1.53E-05 |
| 638.92196 | 63.51  | 11.33 | 13.89 | 10.38 | 9.78  | 3.14E-21  | 6.22E-10 | 5.72E-02 | 5.00E-04 | 4.42E-14 | 3.91E-14 | 4.26E-01 |
| 639.23476 | 155.67 | 15.87 | 16.60 | 17.51 | 16.76 | 3.43E-20  | 1.67E-05 | 2.89E-14 | 1.98E-07 | 8.39E-08 | 7.42E-01 | 2.40E-05 |
| 639.27693 | 155.29 | 15.92 | 15.45 | 15.77 | 15.48 | 2.13E-01  | 2.65E-01 | 9.34E-01 | 3.35E-01 | 6.21E-01 | 1.00E+00 | 6.97E-01 |
| 639.31194 | 222.54 | 15.08 | 8.12  | 8.79  | 7.40  | 1.65E-40  | 5.11E-15 | 5.33E-15 | 5.11E-15 | 5.50E-01 | 5.14E-01 | 3.93E-02 |
| 639.55695 | 282.15 | 18.27 | 18.41 | 18.61 | 18.95 | 1.51E-02  | 9.15E-01 | 3.65E-01 | 9.89E-03 | 7.82E-01 | 7.11E-02 | 4.09E-01 |
| 639.72645 | 57.9   | 13.76 | 14.31 | 16.43 | 15.91 | 6.92E-17  | 3.00E-01 | 5.37E-14 | 1.18E-09 | 1.71E-09 | 1.49E-05 | 3.96E-01 |
| 639.76113 | 52.64  | 17.07 | 18.24 | 18.66 | 18.38 | 1.46E-42  | 6.00E-15 | 5.11E-15 | 5.11E-15 | 1.81E-04 | 5.30E-01 | 2.96E-02 |
| 639.8215  | 45.81  | 13.10 | 14.00 | 13.96 | 14.18 | 1.32E-04  | 2.58E-03 | 3.83E-03 | 2.55E-04 | 9.99E-01 | 9.03E-01 | 8.40E-01 |
| 639.91968 | 42.88  | 12.16 | 13.19 | 13.13 | 12.56 | 3.90E-06  | 2.37E-05 | 6.43E-05 | 2.78E-01 | 9.93E-01 | 3.37E-02 | 6.25E-02 |
| 640.07181 | 22.44  | 13.15 | 15.66 | 15.22 | 14.37 | 2.68E-09  | 4.76E-09 | 1.31E-06 | 1.42E-02 | 6.87E-01 | 1.03E-02 | 1.60E-01 |
| 640.23827 | 155.69 | 12.83 | 13.58 | 15.36 | 14.44 | 5.13E-16  | 4.08E-02 | 4.34E-14 | 4.05E-07 | 1.60E-08 | 2.08E-02 | 1.09E-02 |
| 640.28076 | 155.95 | 12.96 | 11.50 | 12.06 | 11.79 | 5.44E-06  | 3.95E-06 | 9.27E-03 | 4.81E-04 | 2.15E-01 | 7.76E-01 | 7.90E-01 |

|           |        |       |       |       |       |           |          |          |          |          |          |          |
|-----------|--------|-------|-------|-------|-------|-----------|----------|----------|----------|----------|----------|----------|
| 640.31238 | 168.48 | 8.75  | 14.35 | 15.14 | 8.03  | 1.52E-27  | 6.42E-14 | 4.40E-14 | 7.17E-01 | 6.45E-01 | 4.23E-14 | 4.11E-14 |
| 640.32463 | 214.14 | 11.90 | 14.75 | 14.28 | 12.54 | 1.17E-13  | 1.14E-11 | 9.68E-09 | 3.67E-01 | 6.26E-01 | 6.33E-07 | 1.12E-04 |
| 640.36216 | 212.41 | 15.38 | 13.23 | 12.67 | 12.64 | 2.41E-08  | 9.10E-05 | 3.44E-07 | 7.39E-07 | 6.75E-01 | 6.73E-01 | 1.00E+00 |
| 640.56082 | 282.06 | 16.26 | 16.09 | 16.60 | 17.12 | 2.41E-02  | 9.57E-01 | 7.39E-01 | 6.40E-02 | 4.47E-01 | 2.09E-02 | 4.52E-01 |
| 640.69498 | 64.1   | 17.94 | 17.88 | 19.06 | 18.66 | 1.03E-21  | 9.49E-01 | 4.37E-14 | 1.66E-07 | 4.43E-14 | 2.57E-08 | 8.45E-03 |
| 640.71273 | 73.64  | 13.71 | 11.52 | 12.79 | 12.65 | 5.06E-23  | 8.66E-15 | 5.78E-06 | 4.34E-07 | 7.60E-10 | 1.09E-07 | 8.99E-01 |
| 640.72764 | 62.03  | 15.06 | 13.73 | 16.40 | 15.78 | 6.40E-27  | 6.48E-09 | 2.71E-09 | 4.45E-03 | 5.33E-15 | 4.40E-14 | 2.46E-02 |
| 640.75588 | 52.23  | 19.65 | 20.53 | 20.92 | 20.72 | 7.18E-50  | 5.11E-15 | 5.11E-15 | 5.11E-15 | 2.72E-07 | 3.35E-02 | 3.11E-02 |
| 640.78004 | 49.99  | 12.43 | 12.22 | 12.88 | 13.19 | 2.20E-02  | 9.17E-01 | 4.90E-01 | 1.03E-01 | 1.89E-01 | 2.51E-02 | 8.00E-01 |
| 640.80481 | 45.07  | 15.68 | 16.30 | 16.62 | 16.78 | 1.42E-11  | 2.98E-04 | 9.21E-09 | 8.38E-11 | 1.65E-01 | 1.48E-02 | 7.35E-01 |
| 640.9937  | 24.9   | 15.79 | 14.59 | 14.58 | 14.60 | 2.17E-03  | 9.19E-03 | 7.81E-03 | 1.22E-02 | 1.00E+00 | 1.00E+00 | 1.00E+00 |
| 641.16371 | 63.81  | 15.60 | 19.71 | 14.68 | 14.92 | 7.48E-141 | 5.11E-15 | 3.26E-14 | 5.03E-12 | 5.11E-15 | 5.11E-15 | 3.20E-02 |
| 641.25072 | 162.25 | 12.53 | 12.08 | 13.57 | 11.71 | 5.22E-07  | 5.00E-01 | 6.50E-03 | 6.48E-02 | 4.98E-05 | 6.96E-01 | 4.90E-07 |
| 641.57246 | 294.5  | 13.56 | 15.66 | 16.53 | 15.62 | 2.23E-12  | 6.03E-07 | 1.08E-12 | 2.16E-06 | 1.18E-01 | 9.99E-01 | 1.03E-01 |
| 641.5771  | 20.3   | 8.28  | 13.16 | 13.74 | 13.10 | 7.77E-25  | 4.32E-14 | 3.06E-14 | 4.25E-14 | 6.69E-01 | 1.00E+00 | 6.22E-01 |
| 641.69627 | 65.7   | 13.10 | 10.88 | 12.21 | 11.98 | 4.51E-20  | 3.09E-14 | 1.02E-04 | 1.53E-06 | 5.70E-09 | 3.66E-06 | 7.16E-01 |
| 641.72986 | 58.13  | 13.36 | 12.54 | 15.33 | 14.84 | 2.10E-17  | 4.27E-02 | 4.07E-09 | 2.93E-05 | 4.34E-14 | 1.25E-10 | 4.27E-01 |
| 641.7592  | 54.76  | 15.12 | 15.19 | 15.93 | 15.82 | 1.11E-23  | 8.45E-01 | 4.42E-14 | 1.76E-13 | 4.97E-14 | 6.17E-11 | 6.16E-01 |
| 641.77323 | 47.58  | 14.58 | 17.53 | 17.15 | 16.96 | 1.19E-40  | 5.11E-15 | 5.11E-15 | 6.00E-15 | 1.89E-01 | 2.36E-02 | 7.88E-01 |
| 641.85103 | 37.53  | 12.19 | 13.85 | 13.53 | 13.17 | 1.36E-03  | 1.03E-03 | 1.17E-02 | 1.26E-01 | 8.87E-01 | 4.58E-01 | 8.66E-01 |
| 642.11843 | 23.1   | 15.63 | 13.00 | 13.98 | 14.95 | 8.91E-08  | 6.17E-08 | 1.13E-03 | 4.36E-01 | 1.38E-01 | 2.45E-04 | 1.54E-01 |
| 642.16683 | 63.92  | 14.74 | 17.56 | 13.38 | 13.81 | 4.32E-104 | 5.11E-15 | 5.11E-15 | 5.13E-14 | 5.11E-15 | 5.11E-15 | 6.23E-04 |
| 642.57473 | 295.69 | 10.67 | 11.51 | 12.83 | 11.61 | 4.26E-05  | 2.32E-01 | 8.46E-06 | 1.64E-01 | 1.82E-02 | 9.96E-01 | 4.18E-02 |
| 642.68457 | 74.12  | 10.26 | 12.74 | 12.58 | 11.75 | 1.95E-11  | 2.94E-10 | 2.58E-09 | 4.08E-04 | 9.73E-01 | 4.64E-02 | 1.22E-01 |
| 642.69301 | 65.7   | 16.43 | 16.11 | 17.44 | 17.02 | 6.60E-22  | 5.24E-02 | 1.41E-13 | 3.38E-05 | 3.80E-14 | 2.31E-10 | 7.59E-03 |
| 642.71066 | 59.19  | 18.51 | 18.65 | 19.65 | 19.30 | 1.68E-22  | 5.98E-01 | 4.09E-14 | 3.91E-10 | 4.73E-14 | 6.26E-07 | 1.51E-02 |
| 642.75314 | 54.68  | 16.28 | 16.53 | 17.07 | 16.87 | 1.70E-18  | 1.84E-02 | 4.35E-14 | 2.31E-10 | 4.80E-09 | 5.51E-04 | 1.11E-01 |
| 642.76945 | 42.8   | 16.49 | 18.19 | 18.37 | 18.35 | 1.06E-41  | 5.11E-15 | 5.11E-15 | 5.11E-15 | 5.08E-01 | 6.23E-01 | 9.99E-01 |
| 642.78626 | 33.77  | 13.59 | 13.48 | 13.27 | 13.67 | 6.59E-02  | 8.75E-01 | 1.47E-01 | 9.52E-01 | 5.47E-01 | 6.10E-01 | 5.77E-02 |
| 642.80586 | 33.01  | 13.05 | 12.34 | 12.79 | 13.11 | 6.56E-02  | 9.35E-02 | 8.21E-01 | 9.97E-01 | 4.73E-01 | 7.94E-02 | 7.41E-01 |
| 642.82798 | 40.37  | 15.11 | 13.74 | 13.43 | 14.28 | 5.15E-07  | 7.08E-05 | 4.81E-07 | 4.25E-02 | 7.49E-01 | 3.43E-01 | 4.16E-02 |
| 642.84925 | 40.67  | 16.05 | 19.19 | 18.83 | 18.92 | 1.36E-23  | 3.95E-14 | 4.24E-14 | 4.40E-14 | 6.54E-01 | 8.32E-01 | 9.93E-01 |
| 642.97468 | 61.82  | 11.18 | 13.97 | 9.69  | 10.21 | 9.85E-115 | 5.11E-15 | 5.11E-15 | 4.29E-14 | 5.11E-15 | 5.11E-15 | 2.26E-06 |
| 643.1607  | 64.06  | 13.26 | 14.56 | 11.29 | 11.98 | 1.59E-80  | 7.77E-15 | 5.11E-15 | 1.33E-14 | 5.11E-15 | 5.11E-15 | 3.27E-08 |
| 643.24564 | 153.46 | 12.40 | 10.72 | 10.81 | 11.24 | 9.29E-11  | 1.46E-09 | 7.68E-09 | 7.80E-05 | 9.85E-01 | 2.07E-01 | 3.62E-01 |
| 643.28959 | 151.76 | 19.38 | 17.78 | 18.81 | 18.13 | 4.28E-20  | 4.11E-14 | 1.96E-03 | 3.45E-12 | 7.12E-09 | 1.55E-01 | 3.70E-04 |
| 643.3197  | 171.91 | 15.83 | 11.61 | 10.17 | 11.25 | 1.49E-19  | 2.33E-11 | 4.13E-14 | 1.76E-12 | 6.95E-02 | 9.33E-01 | 2.79E-01 |
| 643.71412 | 63.03  | 14.14 | 10.43 | 14.87 | 13.94 | 5.35E-63  | 5.11E-15 | 7.97E-04 | 7.24E-01 | 5.11E-15 | 5.11E-15 | 2.76E-05 |
| 643.74866 | 52.98  | 13.97 | 14.16 | 13.58 | 13.93 | 1.93E-01  | 8.81E-01 | 4.51E-01 | 9.99E-01 | 1.37E-01 | 8.36E-01 | 5.88E-01 |
| 643.77282 | 47.7   | 14.25 | 15.55 | 15.20 | 15.37 | 1.48E-17  | 4.36E-14 | 7.34E-10 | 2.68E-12 | 8.34E-02 | 6.55E-01 | 6.54E-01 |
| 643.81862 | 42.56  | 12.62 | 15.39 | 14.10 | 14.39 | 1.39E-05  | 3.28E-06 | 2.97E-02 | 8.36E-03 | 8.90E-02 | 2.89E-01 | 9.57E-01 |
| 644.29305 | 144.01 | 17.77 | 15.55 | 16.81 | 16.46 | 2.65E-22  | 1.44E-14 | 6.67E-06 | 1.58E-09 | 4.58E-09 | 6.94E-05 | 2.98E-01 |
| 644.32137 | 182.38 | 15.32 | 11.64 | 12.37 | 12.24 | 3.21E-23  | 3.26E-14 | 4.79E-14 | 4.60E-14 | 1.50E-01 | 3.47E-01 | 9.79E-01 |
| 644.39466 | 192.54 | 12.42 | 13.21 | 12.86 | 13.21 | 3.17E-03  | 6.18E-03 | 2.65E-01 | 8.03E-03 | 4.62E-01 | 1.00E+00 | 4.82E-01 |
| 644.70764 | 58.22  | 17.87 | 17.54 | 18.76 | 18.42 | 7.53E-28  | 3.98E-03 | 4.13E-14 | 6.46E-07 | 6.00E-15 | 5.22E-14 | 5.79E-03 |

|           |        |       |       |       |       |          |          |          |          |          |          |          |
|-----------|--------|-------|-------|-------|-------|----------|----------|----------|----------|----------|----------|----------|
| 644.74815 | 49.16  | 13.87 | 13.06 | 13.35 | 13.55 | 3.95E-07 | 1.18E-07 | 1.10E-03 | 1.23E-01 | 1.80E-01 | 4.81E-03 | 4.87E-01 |
| 644.76631 | 50.86  | 15.45 | 15.76 | 16.26 | 16.30 | 2.08E-12 | 5.53E-02 | 7.75E-10 | 4.83E-10 | 4.02E-04 | 2.00E-04 | 9.90E-01 |
| 644.78715 | 43.18  | 17.95 | 19.37 | 18.88 | 19.07 | 4.66E-23 | 2.24E-14 | 2.17E-11 | 5.13E-14 | 9.45E-04 | 1.14E-01 | 4.55E-01 |
| 644.81325 | 48.33  | 15.02 | 14.96 | 15.46 | 15.74 | 5.94E-03 | 9.94E-01 | 2.61E-01 | 2.03E-02 | 1.79E-01 | 1.23E-02 | 6.75E-01 |
| 644.84491 | 42.25  | 13.86 | 17.06 | 16.52 | 16.92 | 2.12E-18 | 4.51E-14 | 9.69E-12 | 1.05E-13 | 4.65E-01 | 9.83E-01 | 7.18E-01 |
| 644.93083 | 52.7   | 11.19 | 16.41 | 11.49 | 11.19 | 5.94E-53 | 5.11E-15 | 7.09E-01 | 1.00E+00 | 5.11E-15 | 5.11E-15 | 7.35E-01 |
| 644.95283 | 61.83  | 11.43 | 12.77 | 9.77  | 10.31 | 2.02E-65 | 2.71E-14 | 5.11E-15 | 4.33E-14 | 5.11E-15 | 5.11E-15 | 2.26E-04 |
| 644.96081 | 169.55 | 10.95 | 10.80 | 10.87 | 11.06 | 8.82E-01 | 9.67E-01 | 9.94E-01 | 9.85E-01 | 9.97E-01 | 8.63E-01 | 9.37E-01 |
| 645.24323 | 156.64 | 14.40 | 11.38 | 12.60 | 13.35 | 3.94E-23 | 1.22E-14 | 1.69E-10 | 6.08E-04 | 4.66E-05 | 6.65E-11 | 3.08E-02 |
| 645.26468 | 167.53 | 12.54 | 10.76 | 10.30 | 11.20 | 2.23E-17 | 1.44E-11 | 4.33E-14 | 7.97E-07 | 2.38E-01 | 3.06E-01 | 2.28E-03 |
| 645.29271 | 155.58 | 11.90 | 10.96 | 11.53 | 11.95 | 9.44E-03 | 1.54E-02 | 6.37E-01 | 9.99E-01 | 2.77E-01 | 1.57E-02 | 5.80E-01 |
| 645.30303 | 151.78 | 18.65 | 18.03 | 18.12 | 17.81 | 1.32E-06 | 3.22E-04 | 2.79E-03 | 8.44E-07 | 9.32E-01 | 5.04E-01 | 1.95E-01 |
| 645.42973 | 234.06 | 17.98 | 17.04 | 17.95 | 18.27 | 3.64E-07 | 6.20E-05 | 9.99E-01 | 5.28E-01 | 1.64E-04 | 3.91E-07 | 4.58E-01 |
| 645.45087 | 291.88 | 17.79 | 20.10 | 19.44 | 19.48 | 1.81E-08 | 1.22E-08 | 6.49E-05 | 7.87E-05 | 2.94E-01 | 3.82E-01 | 1.00E+00 |
| 645.71272 | 62.03  | 14.11 | 10.87 | 12.93 | 12.82 | 4.34E-31 | 5.11E-15 | 1.66E-06 | 4.42E-07 | 4.31E-14 | 1.45E-13 | 9.71E-01 |
| 645.79241 | 45.06  | 14.69 | 16.55 | 15.63 | 16.04 | 2.14E-13 | 1.22E-13 | 1.97E-04 | 1.18E-07 | 5.06E-04 | 1.34E-01 | 3.22E-01 |
| 645.93436 | 62.18  | 12.21 | 12.68 | 10.41 | 11.09 | 1.82E-30 | 3.75E-02 | 3.97E-14 | 1.08E-08 | 5.33E-15 | 5.06E-14 | 1.40E-03 |
| 646.04926 | 25.08  | 16.04 | 13.81 | 13.19 | 12.93 | 1.95E-12 | 1.80E-06 | 6.02E-10 | 6.88E-11 | 4.90E-01 | 2.06E-01 | 9.33E-01 |
| 646.07298 | 17.39  | 13.16 | 15.61 | 15.45 | 15.00 | 1.51E-15 | 1.63E-13 | 2.12E-12 | 4.93E-08 | 9.55E-01 | 2.13E-01 | 4.67E-01 |
| 646.23406 | 104.17 | 10.28 | 13.42 | 9.75  | 8.95  | 8.61E-27 | 4.35E-14 | 4.29E-01 | 1.75E-03 | 4.26E-14 | 7.33E-15 | 1.38E-01 |
| 646.27678 | 190.1  | 8.55  | 11.47 | 12.19 | 10.20 | 1.28E-11 | 1.02E-07 | 2.01E-11 | 7.73E-03 | 4.89E-01 | 7.81E-02 | 1.01E-03 |
| 646.29219 | 197.97 | 12.75 | 12.07 | 11.00 | 12.12 | 6.01E-03 | 5.12E-01 | 2.28E-03 | 5.98E-01 | 1.46E-01 | 1.00E+00 | 1.32E-01 |
| 646.30765 | 162.31 | 16.91 | 16.21 | 16.33 | 15.95 | 2.93E-07 | 1.41E-04 | 2.18E-03 | 1.68E-07 | 8.85E-01 | 4.31E-01 | 1.16E-01 |
| 646.3347  | 207.93 | 18.59 | 18.97 | 18.79 | 18.86 | 3.36E-02 | 2.05E-02 | 3.94E-01 | 1.77E-01 | 5.49E-01 | 8.65E-01 | 9.57E-01 |
| 646.43331 | 234.46 | 15.77 | 13.13 | 15.88 | 16.18 | 8.14E-12 | 1.11E-08 | 9.94E-01 | 7.77E-01 | 5.41E-09 | 3.84E-10 | 9.03E-01 |
| 646.4541  | 290.75 | 16.32 | 18.29 | 17.73 | 17.49 | 3.91E-05 | 1.66E-05 | 3.32E-03 | 2.95E-02 | 5.43E-01 | 2.52E-01 | 9.42E-01 |
| 646.69699 | 49.02  | 13.99 | 11.98 | 12.99 | 13.27 | 1.03E-13 | 5.02E-14 | 1.39E-04 | 1.63E-02 | 1.80E-04 | 2.00E-06 | 6.55E-01 |
| 646.70443 | 59.25  | 15.82 | 13.03 | 15.80 | 15.81 | 2.59E-42 | 5.11E-15 | 1.00E+00 | 1.00E+00 | 5.11E-15 | 5.11E-15 | 1.00E+00 |
| 646.72453 | 57.53  | 15.01 | 9.02  | 13.23 | 13.12 | 4.59E-26 | 5.55E-15 | 1.21E-03 | 8.28E-04 | 5.03E-14 | 2.00E-13 | 9.96E-01 |
| 646.74431 | 53.87  | 15.96 | 15.39 | 16.90 | 16.74 | 4.87E-20 | 1.71E-03 | 1.46E-08 | 8.10E-06 | 4.36E-14 | 1.04E-13 | 7.37E-01 |
| 646.78535 | 42.86  | 15.04 | 14.19 | 14.22 | 14.76 | 2.22E-07 | 4.44E-06 | 7.45E-06 | 3.55E-01 | 9.99E-01 | 7.75E-03 | 1.14E-02 |
| 646.80277 | 44.07  | 18.28 | 20.60 | 20.26 | 20.21 | 2.71E-39 | 5.11E-15 | 5.11E-15 | 5.77E-15 | 1.29E-01 | 7.43E-02 | 9.89E-01 |
| 646.92215 | 51.43  | 11.81 | 14.57 | 9.70  | 10.75 | 7.19E-42 | 4.13E-14 | 3.97E-12 | 1.46E-03 | 5.11E-15 | 5.11E-15 | 2.27E-03 |
| 646.93354 | 61.93  | 13.44 | 14.08 | 11.50 | 12.19 | 2.61E-80 | 3.16E-11 | 5.11E-15 | 5.11E-15 | 5.11E-15 | 5.11E-15 | 9.45E-12 |
| 647.07472 | 21.62  | 11.91 | 13.59 | 13.49 | 13.23 | 3.22E-15 | 3.82E-13 | 4.08E-12 | 2.07E-08 | 9.67E-01 | 3.65E-01 | 6.33E-01 |
| 647.33778 | 210.3  | 16.58 | 16.35 | 16.17 | 16.53 | 1.86E-01 | 6.71E-01 | 1.77E-01 | 9.95E-01 | 8.20E-01 | 8.38E-01 | 3.31E-01 |
| 647.44613 | 242.57 | 14.39 | 13.17 | 14.23 | 13.87 | 2.51E-03 | 1.96E-03 | 9.59E-01 | 4.24E-01 | 1.26E-02 | 2.06E-01 | 7.36E-01 |
| 647.71458 | 59.59  | 13.96 | 11.84 | 14.60 | 14.25 | 2.09E-27 | 4.42E-14 | 2.06E-02 | 5.71E-01 | 6.22E-15 | 4.10E-14 | 4.44E-01 |
| 647.80479 | 45.05  | 13.50 | 16.69 | 16.04 | 16.20 | 4.11E-26 | 1.22E-14 | 4.40E-14 | 4.24E-14 | 9.77E-02 | 3.28E-01 | 9.47E-01 |
| 647.84286 | 38.48  | 14.22 | 14.34 | 14.57 | 13.74 | 2.12E-02 | 9.67E-01 | 4.98E-01 | 2.64E-01 | 8.00E-01 | 1.22E-01 | 1.09E-02 |
| 648.06759 | 24.65  | 12.89 | 11.90 | 12.00 | 11.91 | 1.68E-02 | 3.38E-02 | 6.47E-02 | 4.35E-02 | 9.93E-01 | 1.00E+00 | 9.95E-01 |
| 648.29285 | 212.08 | 18.03 | 19.63 | 19.48 | 19.12 | 1.49E-20 | 4.24E-14 | 4.29E-14 | 1.82E-09 | 7.82E-01 | 1.71E-02 | 1.62E-01 |
| 648.32042 | 169.81 | 16.13 | 13.98 | 14.36 | 14.00 | 3.26E-22 | 4.24E-14 | 1.50E-13 | 4.29E-14 | 3.12E-01 | 1.00E+00 | 3.82E-01 |
| 648.34853 | 204.14 | 16.42 | 14.31 | 14.81 | 11.68 | 3.48E-14 | 4.67E-04 | 1.16E-02 | 4.57E-14 | 7.92E-01 | 2.07E-05 | 2.25E-07 |
| 648.65914 | 68.51  | 12.80 | 11.61 | 11.94 | 12.16 | 1.68E-06 | 6.72E-07 | 4.82E-04 | 2.37E-02 | 4.49E-01 | 7.70E-02 | 7.56E-01 |

|           |        |       |       |       |       |           |          |          |          |          |          |          |
|-----------|--------|-------|-------|-------|-------|-----------|----------|----------|----------|----------|----------|----------|
| 648.71682 | 52.87  | 13.47 | 11.14 | 11.92 | 12.45 | 3.17E-24  | 7.77E-15 | 4.82E-13 | 4.44E-06 | 6.24E-04 | 6.73E-09 | 5.21E-02 |
| 648.72452 | 59.13  | 14.87 | 13.01 | 14.76 | 14.51 | 2.40E-37  | 5.11E-15 | 8.39E-01 | 3.34E-02 | 5.11E-15 | 1.89E-14 | 2.31E-01 |
| 648.74062 | 57.02  | 17.48 | 16.26 | 17.12 | 17.21 | 5.68E-22  | 2.58E-14 | 5.92E-03 | 7.96E-02 | 3.81E-12 | 1.89E-13 | 8.63E-01 |
| 648.79626 | 42.19  | 16.43 | 18.34 | 18.25 | 18.11 | 1.06E-30  | 6.22E-15 | 1.02E-14 | 4.05E-14 | 9.39E-01 | 4.80E-01 | 8.14E-01 |
| 648.87769 | 45.68  | 14.47 | 15.32 | 15.57 | 15.95 | 5.70E-04  | 8.01E-02 | 1.00E-02 | 3.60E-04 | 8.95E-01 | 3.28E-01 | 7.35E-01 |
| 649.01069 | 16.78  | 8.07  | 14.60 | 13.52 | 12.51 | 4.00E-40  | 5.11E-15 | 5.11E-15 | 3.89E-14 | 4.92E-02 | 1.39E-05 | 8.83E-02 |
| 649.01868 | 19.18  | 10.24 | 12.53 | 11.60 | 11.50 | 5.98E-27  | 5.11E-15 | 1.51E-12 | 1.75E-10 | 2.61E-06 | 4.98E-07 | 9.56E-01 |
| 649.08935 | 39.88  | 14.15 | 14.42 | 13.22 | 14.93 | 2.23E-04  | 8.83E-01 | 5.88E-02 | 1.70E-01 | 9.29E-03 | 5.60E-01 | 9.42E-05 |
| 649.10528 | 101.8  | 11.46 | 12.82 | 12.92 | 13.25 | 2.10E-04  | 8.31E-03 | 3.38E-03 | 3.04E-04 | 9.95E-01 | 7.65E-01 | 8.75E-01 |
| 649.29607 | 210.43 | 15.80 | 17.41 | 17.29 | 16.90 | 1.64E-13  | 4.25E-12 | 7.86E-11 | 4.42E-06 | 9.49E-01 | 1.07E-01 | 2.92E-01 |
| 649.5059  | 294.46 | 11.46 | 14.37 | 11.76 | 13.18 | 1.09E-10  | 8.18E-10 | 8.96E-01 | 7.74E-04 | 7.16E-08 | 4.73E-02 | 1.01E-02 |
| 649.71716 | 59.36  | 13.57 | 11.99 | 15.15 | 14.18 | 1.22E-24  | 1.75E-08 | 1.19E-08 | 9.02E-02 | 6.66E-15 | 2.07E-13 | 2.03E-03 |
| 649.75928 | 49.65  | 14.25 | 17.39 | 17.14 | 16.89 | 1.23E-42  | 5.11E-15 | 5.11E-15 | 5.11E-15 | 5.95E-01 | 8.31E-02 | 6.37E-01 |
| 649.77848 | 42.87  | 14.84 | 12.88 | 12.95 | 12.96 | 2.94E-10  | 2.88E-08 | 6.80E-08 | 2.26E-07 | 9.97E-01 | 9.96E-01 | 1.00E+00 |
| 650.26283 | 34.62  | 11.74 | 13.05 | 11.72 | 12.87 | 5.30E-04  | 5.87E-03 | 1.00E+00 | 3.01E-02 | 5.94E-03 | 9.71E-01 | 2.94E-02 |
| 650.30862 | 197.3  | 14.40 | 12.40 | 12.67 | 11.97 | 2.87E-05  | 7.61E-04 | 4.41E-03 | 4.34E-05 | 9.56E-01 | 8.64E-01 | 5.74E-01 |
| 650.36692 | 193.44 | 17.72 | 18.91 | 18.69 | 18.37 | 8.80E-06  | 7.98E-06 | 3.45E-04 | 4.28E-02 | 8.07E-01 | 1.45E-01 | 5.77E-01 |
| 650.72577 | 58.75  | 14.30 | 11.87 | 13.13 | 13.59 | 5.88E-14  | 5.11E-14 | 2.24E-04 | 7.12E-02 | 1.18E-04 | 1.51E-07 | 3.93E-01 |
| 650.73612 | 61.46  | 14.98 | 12.51 | 12.27 | 13.18 | 1.90E-20  | 4.31E-14 | 4.13E-14 | 6.19E-09 | 8.26E-01 | 1.03E-01 | 1.00E-02 |
| 650.75727 | 50.38  | 13.46 | 14.27 | 14.00 | 14.08 | 9.20E-07  | 6.09E-07 | 1.48E-03 | 2.93E-04 | 2.80E-01 | 6.30E-01 | 9.49E-01 |
| 650.7933  | 38.2   | 12.47 | 13.04 | 14.16 | 13.47 | 4.97E-06  | 2.90E-01 | 1.48E-06 | 1.41E-02 | 3.92E-03 | 5.79E-01 | 1.68E-01 |
| 650.81492 | 45.83  | 15.45 | 15.20 | 15.09 | 15.89 | 3.61E-02  | 7.90E-01 | 5.48E-01 | 4.16E-01 | 9.82E-01 | 8.45E-02 | 3.12E-02 |
| 650.83613 | 46.74  | 17.93 | 19.68 | 19.81 | 19.74 | 8.66E-36  | 5.77E-15 | 5.11E-15 | 5.33E-15 | 7.83E-01 | 9.80E-01 | 9.53E-01 |
| 650.93578 | 53.63  | 11.85 | 15.64 | 10.02 | 10.69 | 2.00E-113 | 5.11E-15 | 5.11E-15 | 4.32E-14 | 5.11E-15 | 5.11E-15 | 4.23E-06 |
| 650.95584 | 63.29  | 12.03 | 13.52 | 10.03 | 10.79 | 2.61E-64  | 3.89E-14 | 5.11E-15 | 6.17E-14 | 5.11E-15 | 5.11E-15 | 5.38E-06 |
| 651.37013 | 194.81 | 15.54 | 15.14 | 15.91 | 15.49 | 1.69E-01  | 6.27E-01 | 6.70E-01 | 9.99E-01 | 1.07E-01 | 7.54E-01 | 6.15E-01 |
| 651.73442 | 56.94  | 13.57 | 12.99 | 13.91 | 13.72 | 2.68E-03  | 8.16E-02 | 4.99E-01 | 9.41E-01 | 1.52E-03 | 2.66E-02 | 8.69E-01 |
| 651.76101 | 48.1   | 13.07 | 12.77 | 12.48 | 13.12 | 1.70E-03  | 3.42E-01 | 4.92E-03 | 9.93E-01 | 3.62E-01 | 2.56E-01 | 3.70E-03 |
| 651.80656 | 43.51  | 13.87 | 16.54 | 15.74 | 16.11 | 5.98E-18  | 4.22E-14 | 1.43E-09 | 3.27E-12 | 3.27E-02 | 4.81E-01 | 6.04E-01 |
| 651.83914 | 46.19  | 12.67 | 13.11 | 13.11 | 13.58 | 1.54E-04  | 1.01E-01 | 9.18E-02 | 3.20E-05 | 1.00E+00 | 8.96E-02 | 8.89E-02 |
| 651.88785 | 61.07  | 15.64 | 12.25 | 16.17 | 16.34 | 9.75E-51  | 5.11E-15 | 6.98E-02 | 1.13E-02 | 5.11E-15 | 5.11E-15 | 8.87E-01 |
| 652.3242  | 209.59 | 16.82 | 18.51 | 17.90 | 18.36 | 1.16E-13  | 1.32E-12 | 6.26E-06 | 2.64E-10 | 2.90E-02 | 9.09E-01 | 1.73E-01 |
| 652.34585 | 187.56 | 15.59 | 15.41 | 16.41 | 14.77 | 6.15E-07  | 9.14E-01 | 1.13E-02 | 1.82E-02 | 1.78E-03 | 1.12E-01 | 1.09E-07 |
| 652.38488 | 217.75 | 13.42 | 13.93 | 15.20 | 12.83 | 4.19E-08  | 5.18E-01 | 1.39E-05 | 4.16E-01 | 5.00E-03 | 2.84E-02 | 2.79E-08 |
| 652.73527 | 56.78  | 13.82 | 12.73 | 13.68 | 13.52 | 6.81E-03  | 5.63E-03 | 9.73E-01 | 8.07E-01 | 2.50E-02 | 1.05E-01 | 9.65E-01 |
| 652.75127 | 49.49  | 14.82 | 13.94 | 14.59 | 14.45 | 1.10E-04  | 3.83E-05 | 6.15E-01 | 2.22E-01 | 5.31E-03 | 6.08E-02 | 8.85E-01 |
| 652.77306 | 46.44  | 18.39 | 18.53 | 18.89 | 18.89 | 3.31E-07  | 5.07E-01 | 9.83E-06 | 1.63E-05 | 4.13E-03 | 4.96E-03 | 1.00E+00 |
| 652.79443 | 49.58  | 18.89 | 21.09 | 21.31 | 21.06 | 1.14E-43  | 5.11E-15 | 5.11E-15 | 5.11E-15 | 4.90E-01 | 9.99E-01 | 4.28E-01 |
| 652.83342 | 43.73  | 15.04 | 17.36 | 17.30 | 17.52 | 3.82E-27  | 3.69E-14 | 4.02E-14 | 2.91E-14 | 9.92E-01 | 9.06E-01 | 7.76E-01 |
| 652.87683 | 58.01  | 12.16 | 14.63 | 10.23 | 10.85 | 1.13E-82  | 5.11E-15 | 5.11E-15 | 4.26E-14 | 5.11E-15 | 5.11E-15 | 2.65E-04 |
| 652.93516 | 62.75  | 12.15 | 13.26 | 10.10 | 10.74 | 8.17E-62  | 2.80E-13 | 5.11E-15 | 4.24E-14 | 5.11E-15 | 5.11E-15 | 6.59E-05 |
| 653.13006 | 22.28  | 17.23 | 17.51 | 16.92 | 15.90 | 1.97E-04  | 8.56E-01 | 8.20E-01 | 1.73E-03 | 3.67E-01 | 1.37E-04 | 3.04E-02 |
| 653.32722 | 194.98 | 14.39 | 15.43 | 15.96 | 16.14 | 5.39E-07  | 8.17E-03 | 1.17E-05 | 1.89E-06 | 3.84E-01 | 1.61E-01 | 9.47E-01 |
| 653.45461 | 231.39 | 12.79 | 12.07 | 12.76 | 14.02 | 2.46E-05  | 1.95E-01 | 1.00E+00 | 7.20E-03 | 2.46E-01 | 5.52E-06 | 6.72E-03 |
| 653.77716 | 47.48  | 14.56 | 15.91 | 15.29 | 15.52 | 2.75E-19  | 3.94E-14 | 3.33E-07 | 1.00E-10 | 3.21E-05 | 2.23E-02 | 3.58E-01 |

|           |        |       |       |       |       |          |          |          |          |          |          |          |
|-----------|--------|-------|-------|-------|-------|----------|----------|----------|----------|----------|----------|----------|
| 653.79781 | 42.38  | 13.44 | 15.03 | 15.24 | 15.22 | 1.03E-19 | 4.49E-13 | 4.33E-14 | 4.64E-14 | 7.36E-01 | 7.99E-01 | 1.00E+00 |
| 653.86734 | 35.83  | 11.47 | 12.12 | 11.80 | 12.01 | 1.24E-01 | 1.10E-01 | 6.44E-01 | 2.57E-01 | 7.03E-01 | 9.85E-01 | 9.00E-01 |
| 653.87634 | 38.1   | 12.59 | 13.70 | 13.74 | 13.39 | 2.25E-05 | 1.51E-04 | 6.52E-05 | 1.50E-02 | 9.99E-01 | 6.66E-01 | 5.65E-01 |
| 653.88408 | 54.88  | 12.33 | 11.94 | 12.58 | 12.73 | 1.80E-01 | 6.99E-01 | 8.98E-01 | 7.06E-01 | 3.05E-01 | 1.65E-01 | 9.79E-01 |
| 654.12493 | 18.69  | 14.80 | 17.29 | 17.06 | 15.75 | 3.96E-07 | 2.35E-06 | 1.78E-05 | 2.10E-01 | 9.65E-01 | 1.32E-02 | 4.53E-02 |
| 654.30369 | 189.77 | 15.45 | 15.12 | 15.11 | 14.94 | 6.87E-02 | 2.98E-01 | 2.80E-01 | 4.85E-02 | 1.00E+00 | 8.23E-01 | 8.28E-01 |
| 654.32491 | 172.47 | 6.76  | 12.31 | 13.85 | 10.48 | 2.35E-20 | 2.90E-13 | 4.06E-14 | 1.77E-06 | 1.30E-01 | 5.91E-02 | 3.00E-05 |
| 654.34237 | 217.45 | 12.63 | 13.50 | 12.51 | 11.95 | 3.98E-03 | 1.30E-01 | 9.91E-01 | 3.46E-01 | 7.50E-02 | 1.59E-03 | 5.29E-01 |
| 654.71022 | 71.23  | 14.63 | 11.75 | 14.69 | 14.31 | 8.19E-41 | 5.11E-15 | 9.87E-01 | 3.69E-01 | 5.11E-15 | 5.33E-15 | 2.28E-01 |
| 654.73159 | 55.38  | 20.65 | 21.31 | 21.90 | 21.65 | 1.14E-42 | 4.42E-14 | 5.11E-15 | 5.11E-15 | 8.55E-13 | 6.73E-05 | 9.26E-03 |
| 654.75284 | 53.2   | 15.74 | 15.83 | 15.19 | 15.44 | 2.33E-04 | 9.24E-01 | 2.49E-03 | 2.54E-01 | 3.72E-04 | 8.21E-02 | 4.00E-01 |
| 654.77165 | 53.08  | 16.84 | 16.70 | 17.06 | 17.06 | 4.84E-04 | 4.59E-01 | 9.65E-02 | 1.25E-01 | 1.59E-03 | 2.76E-03 | 1.00E+00 |
| 654.77936 | 47.2   | 14.02 | 13.43 | 12.89 | 13.59 | 5.47E-07 | 1.40E-02 | 8.18E-08 | 1.29E-01 | 3.27E-02 | 8.76E-01 | 3.87E-03 |
| 654.79293 | 48.92  | 16.74 | 18.99 | 19.33 | 19.05 | 2.86E-40 | 5.11E-15 | 5.11E-15 | 5.11E-15 | 2.04E-01 | 9.84E-01 | 4.09E-01 |
| 655.07628 | 23.23  | 10.57 | 12.30 | 11.08 | 12.96 | 6.93E-05 | 8.06E-03 | 7.77E-01 | 1.35E-04 | 1.19E-01 | 6.54E-01 | 5.36E-03 |
| 655.0861  | 19.99  | 13.03 | 14.23 | 13.79 | 13.76 | 7.46E-05 | 2.17E-05 | 1.50E-02 | 2.87E-02 | 3.13E-01 | 2.84E-01 | 9.99E-01 |
| 655.10779 | 28.77  | 12.98 | 13.16 | 13.34 | 13.65 | 2.34E-01 | 9.45E-01 | 6.82E-01 | 1.82E-01 | 9.50E-01 | 4.74E-01 | 7.88E-01 |
| 655.11674 | 24.22  | 13.31 | 13.29 | 13.24 | 13.97 | 2.08E-02 | 1.00E+00 | 9.92E-01 | 5.13E-02 | 9.97E-01 | 5.19E-02 | 2.82E-02 |
| 655.17777 | 55.94  | 12.12 | 12.95 | 10.20 | 10.83 | 4.79E-66 | 2.31E-11 | 5.11E-15 | 2.51E-14 | 5.11E-15 | 5.11E-15 | 2.11E-06 |
| 655.24958 | 155.12 | 11.81 | 11.83 | 12.42 | 11.72 | 6.17E-03 | 9.99E-01 | 2.11E-02 | 9.75E-01 | 3.73E-02 | 9.54E-01 | 9.68E-03 |
| 655.30909 | 173.49 | 11.80 | 12.97 | 14.64 | 11.68 | 3.25E-09 | 7.00E-02 | 4.36E-08 | 9.95E-01 | 3.90E-03 | 5.38E-02 | 6.80E-08 |
| 655.47409 | 227.11 | 20.89 | 19.06 | 20.40 | 20.60 | 8.46E-22 | 3.44E-14 | 2.08E-02 | 3.52E-01 | 1.92E-12 | 4.95E-14 | 6.69E-01 |
| 655.49576 | 228.53 | 18.03 | 17.41 | 17.29 | 17.59 | 2.12E-01 | 3.40E-01 | 1.94E-01 | 6.49E-01 | 9.91E-01 | 9.69E-01 | 8.79E-01 |
| 655.70195 | 51.41  | 11.58 | 9.31  | 12.41 | 12.42 | 1.68E-25 | 1.16E-13 | 1.19E-02 | 1.55E-02 | 2.51E-14 | 3.26E-14 | 1.00E+00 |
| 655.73506 | 55.38  | 16.73 | 17.37 | 18.18 | 17.89 | 9.29E-34 | 9.08E-09 | 5.11E-15 | 2.62E-14 | 1.94E-12 | 1.87E-05 | 3.29E-02 |
| 655.78922 | 48.3   | 12.48 | 12.32 | 12.28 | 13.00 | 1.50E-02 | 8.97E-01 | 8.19E-01 | 1.27E-01 | 9.98E-01 | 2.83E-02 | 1.67E-02 |
| 655.89611 | 54.66  | 11.72 | 12.65 | 12.72 | 12.85 | 6.61E-05 | 2.73E-03 | 8.14E-04 | 2.12E-04 | 9.91E-01 | 8.79E-01 | 9.66E-01 |
| 656.04273 | 16.84  | 8.77  | 12.58 | 12.38 | 11.05 | 9.62E-17 | 5.31E-14 | 1.50E-13 | 6.97E-06 | 9.72E-01 | 6.64E-03 | 2.26E-02 |
| 656.3186  | 200.73 | 19.16 | 19.53 | 19.52 | 19.49 | 8.01E-03 | 1.88E-02 | 1.98E-02 | 4.87E-02 | 1.00E+00 | 9.94E-01 | 9.96E-01 |
| 656.35781 | 204.38 | 15.81 | 16.70 | 17.24 | 16.83 | 1.25E-09 | 2.15E-04 | 3.79E-10 | 2.33E-05 | 5.57E-02 | 9.28E-01 | 2.46E-01 |
| 656.4772  | 227.17 | 19.81 | 17.86 | 19.30 | 19.50 | 2.24E-22 | 2.82E-14 | 2.25E-02 | 3.14E-01 | 5.74E-13 | 4.64E-14 | 7.28E-01 |
| 656.499   | 228.65 | 16.84 | 15.82 | 15.69 | 15.57 | 9.82E-03 | 6.82E-02 | 2.86E-02 | 1.66E-02 | 9.91E-01 | 9.43E-01 | 9.92E-01 |
| 656.66911 | 66.81  | 14.93 | 14.24 | 16.64 | 16.08 | 3.03E-18 | 3.70E-02 | 4.38E-10 | 7.53E-05 | 4.23E-14 | 3.19E-10 | 1.54E-01 |
| 656.68981 | 71.19  | 14.26 | 11.29 | 14.95 | 13.87 | 2.31E-39 | 5.11E-15 | 1.18E-02 | 3.26E-01 | 5.11E-15 | 2.89E-14 | 4.20E-05 |
| 656.70686 | 65.82  | 14.42 | 11.16 | 14.13 | 13.42 | 2.83E-32 | 5.11E-15 | 6.15E-01 | 3.94E-04 | 6.22E-15 | 4.29E-14 | 2.61E-02 |
| 656.72984 | 55.45  | 19.50 | 20.04 | 20.67 | 20.44 | 8.15E-40 | 2.18E-11 | 5.11E-15 | 5.33E-15 | 6.32E-14 | 2.34E-06 | 1.51E-02 |
| 656.76793 | 51.48  | 13.84 | 13.24 | 13.07 | 13.62 | 2.16E-03 | 3.21E-02 | 2.44E-03 | 7.55E-01 | 8.69E-01 | 3.54E-01 | 7.78E-02 |
| 656.77612 | 45.13  | 13.49 | 12.63 | 12.71 | 13.06 | 1.54E-04 | 2.67E-04 | 1.14E-03 | 1.81E-01 | 9.78E-01 | 2.03E-01 | 3.85E-01 |
| 656.78566 | 47.91  | 14.84 | 13.77 | 14.69 | 15.29 | 2.02E-08 | 2.39E-05 | 9.14E-01 | 2.25E-01 | 4.99E-04 | 7.48E-09 | 6.32E-02 |
| 656.86497 | 40.87  | 14.65 | 16.16 | 15.51 | 16.09 | 1.17E-05 | 3.05E-05 | 4.06E-02 | 1.36E-04 | 1.95E-01 | 9.96E-01 | 3.18E-01 |
| 657.13529 | 63.97  | 6.64  | 20.45 | 7.10  | 6.87  | 4.32E-66 | 5.11E-15 | 8.77E-01 | 9.83E-01 | 5.11E-15 | 5.11E-15 | 9.86E-01 |
| 657.32255 | 202.3  | 17.44 | 17.59 | 17.57 | 17.59 | 6.62E-01 | 7.05E-01 | 7.95E-01 | 7.25E-01 | 9.98E-01 | 1.00E+00 | 9.99E-01 |
| 657.3611  | 204.33 | 13.03 | 12.88 | 13.84 | 13.20 | 1.35E-01 | 9.85E-01 | 2.22E-01 | 9.79E-01 | 1.24E-01 | 8.89E-01 | 4.82E-01 |
| 657.48111 | 227.77 | 17.32 | 13.40 | 16.28 | 16.90 | 8.37E-21 | 3.93E-14 | 3.00E-02 | 6.96E-01 | 1.45E-11 | 4.64E-14 | 4.03E-01 |
| 657.51112 | 234.6  | 20.87 | 21.09 | 21.40 | 20.82 | 2.67E-01 | 8.92E-01 | 3.23E-01 | 9.99E-01 | 7.73E-01 | 8.46E-01 | 2.96E-01 |

|           |        |       |       |       |       |           |          |          |          |          |          |          |
|-----------|--------|-------|-------|-------|-------|-----------|----------|----------|----------|----------|----------|----------|
| 657.70555 | 59.73  | 13.71 | 10.86 | 13.51 | 12.64 | 3.65E-26  | 1.04E-14 | 8.42E-01 | 1.55E-04 | 3.46E-14 | 2.33E-10 | 4.03E-03 |
| 657.73265 | 57.43  | 13.99 | 12.69 | 13.69 | 13.76 | 1.28E-34  | 5.11E-15 | 5.13E-03 | 5.27E-02 | 2.53E-14 | 1.62E-14 | 9.13E-01 |
| 657.74627 | 50.9   | 13.83 | 14.63 | 14.31 | 14.38 | 3.31E-07  | 9.28E-08 | 2.68E-03 | 6.62E-04 | 9.76E-02 | 3.01E-01 | 9.60E-01 |
| 658.13834 | 64.13  | 13.22 | 16.21 | 11.22 | 11.91 | 3.84E-111 | 5.11E-15 | 5.11E-15 | 2.04E-14 | 5.11E-15 | 5.11E-15 | 1.63E-07 |
| 658.32957 | 199.9  | 15.26 | 13.15 | 12.47 | 13.54 | 1.92E-13  | 2.15E-08 | 1.59E-13 | 1.09E-05 | 2.15E-01 | 7.13E-01 | 1.77E-02 |
| 658.37335 | 212.71 | 13.62 | 13.00 | 13.45 | 12.36 | 6.39E-03  | 3.29E-01 | 9.61E-01 | 5.22E-03 | 6.37E-01 | 3.51E-01 | 2.65E-02 |
| 658.41956 | 158.88 | 14.33 | 13.29 | 13.39 | 13.39 | 9.70E-05  | 3.20E-04 | 1.38E-03 | 2.14E-03 | 9.77E-01 | 9.80E-01 | 1.00E+00 |
| 658.51389 | 234.92 | 19.71 | 19.78 | 20.14 | 19.73 | 3.22E-01  | 9.93E-01 | 3.37E-01 | 1.00E+00 | 5.20E-01 | 9.98E-01 | 4.29E-01 |
| 658.66705 | 67.1   | 13.27 | 10.87 | 15.06 | 13.84 | 6.67E-34  | 4.61E-14 | 1.82E-09 | 1.78E-01 | 5.11E-15 | 3.93E-14 | 1.83E-04 |
| 658.68521 | 62.34  | 15.54 | 15.30 | 17.43 | 16.96 | 1.83E-10  | 8.95E-01 | 2.89E-07 | 3.55E-04 | 1.84E-08 | 3.47E-05 | 5.35E-01 |
| 658.7327  | 54.9   | 17.02 | 17.30 | 18.05 | 17.77 | 7.09E-29  | 4.43E-03 | 5.33E-15 | 4.33E-14 | 4.31E-14 | 6.64E-07 | 8.24E-03 |
| 658.74123 | 46.01  | 14.37 | 14.25 | 14.74 | 14.71 | 9.75E-07  | 5.89E-01 | 1.70E-03 | 6.49E-03 | 1.73E-05 | 1.03E-04 | 9.94E-01 |
| 658.75929 | 35.22  | 12.95 | 13.09 | 13.54 | 13.72 | 4.53E-03  | 9.26E-01 | 5.67E-02 | 8.03E-03 | 2.49E-01 | 5.62E-02 | 8.76E-01 |
| 658.80168 | 47.46  | 14.26 | 14.31 | 13.41 | 14.37 | 4.58E-02  | 9.99E-01 | 1.08E-01 | 9.92E-01 | 9.07E-02 | 9.99E-01 | 7.46E-02 |
| 658.82338 | 43.12  | 17.73 | 20.60 | 20.32 | 20.32 | 4.18E-31  | 5.77E-15 | 1.91E-14 | 2.86E-14 | 6.23E-01 | 6.64E-01 | 1.00E+00 |
| 659.13421 | 63.96  | 13.03 | 15.47 | 11.02 | 11.85 | 2.94E-92  | 5.11E-15 | 5.11E-15 | 4.17E-14 | 5.11E-15 | 5.11E-15 | 8.40E-09 |
| 659.22025 | 151.58 | 10.75 | 10.73 | 11.04 | 10.27 | 1.85E-01  | 1.00E+00 | 8.04E-01 | 5.04E-01 | 7.95E-01 | 5.54E-01 | 1.20E-01 |
| 659.51672 | 241.69 | 20.43 | 19.52 | 19.69 | 19.99 | 2.75E-06  | 2.90E-06 | 1.72E-04 | 7.10E-02 | 7.84E-01 | 5.77E-02 | 3.59E-01 |
| 659.72154 | 59.54  | 13.63 | 11.65 | 14.42 | 13.67 | 3.39E-21  | 9.25E-13 | 8.42E-03 | 9.98E-01 | 3.20E-14 | 4.22E-12 | 2.29E-02 |
| 659.7476  | 52.37  | 13.64 | 12.53 | 12.53 | 13.28 | 1.52E-10  | 2.65E-08 | 1.95E-08 | 2.12E-01 | 1.00E+00 | 7.31E-04 | 6.46E-04 |
| 659.79321 | 45.12  | 13.25 | 17.20 | 16.41 | 16.57 | 2.15E-25  | 1.62E-14 | 4.25E-14 | 4.40E-14 | 1.22E-01 | 3.11E-01 | 9.75E-01 |
| 659.8249  | 43.61  | 13.39 | 14.35 | 13.92 | 14.38 | 5.89E-05  | 2.73E-04 | 1.03E-01 | 2.35E-04 | 2.56E-01 | 9.99E-01 | 2.15E-01 |
| 660.13462 | 64.53  | 11.53 | 12.43 | 9.89  | 10.43 | 7.45E-63  | 9.66E-14 | 5.11E-15 | 4.37E-14 | 5.11E-15 | 5.11E-15 | 1.82E-05 |
| 660.29156 | 46.34  | 10.84 | 11.75 | 11.93 | 11.89 | 4.99E-03  | 4.31E-02 | 9.03E-03 | 1.78E-02 | 9.60E-01 | 9.82E-01 | 1.00E+00 |
| 660.35063 | 208.11 | 16.42 | 15.79 | 15.94 | 15.88 | 4.66E-02  | 4.86E-02 | 1.92E-01 | 1.28E-01 | 9.30E-01 | 9.88E-01 | 9.94E-01 |
| 660.51109 | 240.69 | 16.57 | 14.88 | 15.34 | 15.25 | 1.22E-05  | 1.08E-05 | 2.19E-03 | 1.30E-03 | 5.58E-01 | 7.46E-01 | 9.94E-01 |
| 660.52994 | 247.93 | 17.98 | 17.13 | 17.20 | 17.69 | 2.76E-02  | 4.22E-02 | 6.98E-02 | 8.05E-01 | 9.96E-01 | 3.58E-01 | 4.73E-01 |
| 660.68027 | 60.94  | 16.17 | 14.22 | 16.80 | 16.58 | 1.95E-48  | 5.11E-15 | 4.41E-05 | 1.95E-02 | 5.11E-15 | 5.11E-15 | 4.56E-01 |
| 660.72124 | 60.37  | 14.29 | 14.00 | 15.27 | 14.87 | 2.00E-07  | 5.69E-01 | 8.21E-05 | 5.96E-02 | 4.20E-07 | 1.69E-03 | 3.07E-01 |
| 660.74025 | 56.15  | 14.55 | 13.60 | 14.29 | 14.61 | 5.86E-12  | 2.50E-10 | 2.25E-01 | 9.75E-01 | 8.78E-06 | 1.88E-10 | 1.19E-01 |
| 660.76078 | 41.12  | 18.32 | 19.41 | 18.98 | 19.01 | 2.69E-23  | 1.02E-14 | 7.94E-11 | 5.64E-11 | 4.28E-05 | 2.77E-04 | 9.91E-01 |
| 660.78411 | 42.62  | 13.13 | 12.86 | 12.82 | 13.43 | 5.93E-02  | 6.82E-01 | 5.50E-01 | 5.93E-01 | 9.97E-01 | 1.07E-01 | 6.56E-02 |
| 660.79438 | 47.04  | 14.00 | 15.84 | 15.02 | 15.62 | 8.06E-12  | 3.48E-11 | 3.23E-04 | 1.19E-08 | 1.01E-02 | 8.49E-01 | 1.13E-01 |
| 660.81979 | 43.97  | 16.43 | 18.47 | 18.17 | 18.31 | 3.14E-25  | 2.93E-14 | 4.33E-14 | 4.26E-14 | 3.87E-01 | 8.35E-01 | 8.96E-01 |
| 660.93178 | 54.56  | 11.42 | 12.75 | 9.80  | 10.44 | 2.23E-56  | 4.16E-14 | 7.11E-15 | 1.06E-10 | 5.11E-15 | 5.11E-15 | 6.42E-05 |
| 661.21459 | 163.74 | 10.12 | 10.08 | 10.94 | 10.58 | 1.99E-02  | 9.99E-01 | 3.81E-02 | 4.70E-01 | 3.37E-02 | 4.22E-01 | 6.73E-01 |
| 661.22365 | 155.82 | 9.62  | 9.71  | 10.44 | 9.92  | 1.82E-01  | 9.96E-01 | 1.66E-01 | 8.83E-01 | 2.80E-01 | 9.58E-01 | 6.02E-01 |
| 661.28817 | 27.01  | 12.25 | 12.48 | 10.85 | 12.20 | 6.55E-03  | 9.68E-01 | 2.45E-02 | 1.00E+00 | 8.05E-03 | 9.50E-01 | 4.87E-02 |
| 661.53337 | 264.57 | 21.30 | 20.62 | 20.59 | 20.83 | 7.83E-09  | 2.82E-07 | 5.65E-08 | 1.10E-03 | 9.94E-01 | 3.40E-01 | 2.18E-01 |
| 661.76494 | 46.93  | 14.74 | 16.67 | 16.04 | 15.92 | 2.12E-27  | 5.11E-15 | 4.66E-14 | 2.13E-12 | 2.86E-04 | 2.40E-05 | 8.86E-01 |
| 661.77172 | 41.28  | 13.80 | 14.05 | 13.57 | 13.70 | 5.98E-03  | 2.36E-01 | 3.14E-01 | 8.96E-01 | 2.90E-03 | 6.69E-02 | 7.83E-01 |
| 661.79559 | 46.03  | 12.24 | 12.84 | 12.27 | 13.31 | 1.88E-04  | 1.05E-01 | 1.00E+00 | 5.18E-04 | 1.44E-01 | 3.17E-01 | 1.00E-03 |
| 662.30854 | 211.75 | 16.23 | 17.52 | 17.51 | 16.99 | 9.88E-13  | 6.69E-11 | 7.94E-11 | 2.88E-04 | 1.00E+00 | 3.06E-02 | 3.69E-02 |
| 662.367   | 206.11 | 14.04 | 8.22  | 11.68 | 8.72  | 5.59E-25  | 2.60E-14 | 5.93E-05 | 4.24E-14 | 4.89E-09 | 8.07E-01 | 1.24E-06 |
| 662.53619 | 262.32 | 19.78 | 19.09 | 19.09 | 19.17 | 1.03E-09  | 5.32E-08 | 5.48E-08 | 4.03E-06 | 1.00E+00 | 9.00E-01 | 9.19E-01 |



|           |        |       |       |       |       |           |          |          |          |          |          |          |
|-----------|--------|-------|-------|-------|-------|-----------|----------|----------|----------|----------|----------|----------|
| 662.67718 | 51.87  | 13.52 | 7.95  | 12.57 | 12.88 | 2.20E-36  | 5.11E-15 | 5.56E-02 | 3.49E-01 | 7.55E-15 | 5.77E-15 | 8.61E-01 |
| 662.69959 | 70.81  | 15.95 | 13.73 | 16.01 | 15.71 | 1.97E-26  | 2.51E-14 | 9.93E-01 | 6.37E-01 | 2.33E-14 | 4.29E-14 | 4.86E-01 |
| 662.75896 | 47.41  | 15.32 | 14.02 | 14.29 | 14.65 | 5.39E-09  | 4.98E-09 | 4.00E-06 | 7.52E-03 | 5.50E-01 | 1.92E-02 | 3.42E-01 |
| 662.77667 | 40.79  | 18.97 | 20.69 | 20.47 | 20.37 | 6.09E-50  | 5.11E-15 | 5.11E-15 | 5.11E-15 | 1.12E-01 | 9.02E-03 | 7.45E-01 |
| 662.83441 | 43.03  | 14.15 | 16.60 | 16.51 | 16.62 | 5.20E-27  | 3.38E-14 | 4.04E-14 | 3.80E-14 | 9.78E-01 | 1.00E+00 | 9.67E-01 |
| 662.95177 | 177.87 | 8.33  | 7.59  | 8.49  | 12.27 | 1.69E-27  | 1.82E-01 | 9.66E-01 | 3.72E-14 | 7.29E-02 | 6.22E-15 | 4.15E-14 |
| 663.14826 | 56.51  | 9.61  | 15.61 | 8.11  | 9.13  | 6.12E-66  | 5.11E-15 | 9.96E-06 | 4.22E-01 | 5.11E-15 | 5.11E-15 | 9.61E-03 |
| 663.1594  | 25.26  | 11.66 | 17.18 | 15.88 | 15.98 | 5.30E-28  | 5.77E-15 | 4.35E-14 | 4.51E-14 | 2.27E-02 | 5.44E-02 | 9.96E-01 |
| 663.2771  | 144.2  | 13.56 | 10.26 | 11.33 | 11.63 | 6.97E-16  | 4.26E-14 | 1.03E-08 | 2.06E-06 | 1.88E-02 | 1.95E-03 | 8.56E-01 |
| 663.31184 | 209.56 | 12.99 | 13.92 | 13.82 | 13.11 | 2.51E-03  | 1.02E-02 | 2.67E-02 | 9.81E-01 | 9.86E-01 | 4.73E-02 | 1.01E-01 |
| 663.53777 | 257.28 | 18.04 | 15.31 | 16.01 | 16.37 | 1.02E-20  | 3.75E-14 | 5.38E-13 | 8.75E-09 | 4.11E-02 | 6.74E-04 | 5.28E-01 |
| 663.77925 | 47.46  | 14.48 | 16.72 | 16.31 | 16.18 | 9.59E-35  | 5.11E-15 | 9.99E-15 | 3.82E-14 | 5.26E-02 | 7.43E-03 | 8.71E-01 |
| 663.81207 | 36.49  | 13.52 | 12.84 | 12.55 | 12.96 | 1.35E-07  | 2.07E-04 | 3.98E-08 | 4.77E-03 | 3.15E-01 | 8.90E-01 | 7.95E-02 |
| 663.82118 | 40.43  | 13.69 | 13.39 | 12.99 | 13.13 | 2.80E-03  | 4.24E-01 | 2.20E-03 | 2.91E-02 | 1.91E-01 | 5.85E-01 | 9.07E-01 |
| 664.10167 | 26.75  | 14.16 | 10.86 | 10.82 | 11.34 | 2.82E-18  | 5.35E-14 | 4.69E-14 | 7.10E-11 | 9.99E-01 | 6.46E-01 | 5.64E-01 |
| 664.38278 | 192.03 | 15.64 | 16.04 | 16.11 | 15.58 | 2.04E-01  | 5.30E-01 | 3.89E-01 | 9.97E-01 | 9.97E-01 | 4.51E-01 | 3.25E-01 |
| 664.69429 | 60.95  | 13.23 | 10.49 | 12.65 | 12.50 | 2.19E-23  | 1.58E-14 | 6.68E-02 | 1.70E-02 | 4.55E-14 | 6.10E-13 | 9.39E-01 |
| 664.71503 | 56.21  | 15.14 | 12.91 | 15.03 | 14.82 | 4.98E-47  | 5.11E-15 | 8.06E-01 | 7.94E-02 | 5.11E-15 | 5.11E-15 | 4.35E-01 |
| 664.77296 | 38.15  | 17.16 | 19.00 | 18.97 | 18.78 | 1.65E-36  | 5.11E-15 | 5.11E-15 | 1.22E-14 | 9.95E-01 | 3.79E-01 | 5.14E-01 |
| 664.85202 | 43.49  | 16.07 | 17.01 | 16.82 | 17.33 | 1.26E-07  | 5.74E-05 | 2.01E-03 | 8.75E-08 | 7.96E-01 | 4.80E-01 | 9.23E-02 |
| 665.29262 | 161.65 | 15.27 | 13.64 | 14.47 | 14.81 | 2.47E-15  | 4.26E-14 | 7.18E-05 | 6.47E-02 | 5.37E-05 | 1.85E-08 | 2.77E-01 |
| 665.38535 | 183.19 | 11.88 | 13.31 | 14.08 | 13.07 | 2.56E-06  | 2.43E-03 | 5.73E-07 | 2.22E-02 | 2.51E-01 | 9.38E-01 | 8.09E-02 |
| 665.72474 | 56.78  | 12.09 | 11.96 | 12.15 | 12.25 | 8.04E-01  | 9.67E-01 | 9.96E-01 | 9.47E-01 | 9.09E-01 | 7.65E-01 | 9.88E-01 |
| 665.73495 | 54.27  | 14.39 | 15.67 | 16.07 | 15.76 | 5.37E-25  | 4.86E-14 | 1.31E-14 | 4.34E-14 | 3.66E-02 | 9.33E-01 | 1.77E-01 |
| 665.75803 | 37.27  | 13.47 | 12.63 | 12.17 | 12.49 | 9.41E-03  | 1.49E-01 | 5.71E-03 | 7.93E-02 | 6.61E-01 | 9.88E-01 | 8.59E-01 |
| 665.77747 | 46.67  | 12.74 | 13.09 | 12.20 | 12.57 | 2.05E-02  | 5.95E-01 | 2.00E-01 | 9.29E-01 | 1.01E-02 | 2.86E-01 | 5.81E-01 |
| 666.3383  | 201.87 | 14.08 | 16.52 | 15.74 | 16.26 | 2.05E-16  | 4.60E-14 | 4.73E-08 | 4.88E-12 | 3.28E-02 | 8.08E-01 | 2.87E-01 |
| 666.39964 | 204.09 | 14.08 | 14.08 | 14.87 | 13.01 | 6.39E-04  | 1.00E+00 | 2.19E-01 | 6.14E-02 | 2.38E-01 | 7.47E-02 | 1.58E-04 |
| 666.71007 | 66.24  | 14.47 | 12.42 | 13.86 | 13.86 | 2.88E-16  | 4.33E-14 | 2.85E-02 | 3.81E-02 | 4.04E-09 | 1.23E-08 | 1.00E+00 |
| 666.7321  | 55.06  | 13.20 | 13.20 | 13.90 | 13.71 | 2.89E-03  | 1.00E+00 | 9.71E-03 | 1.25E-01 | 1.32E-02 | 1.44E-01 | 8.41E-01 |
| 666.76677 | 31.95  | 14.09 | 13.34 | 13.18 | 13.45 | 5.95E-08  | 1.53E-05 | 7.75E-08 | 4.01E-04 | 7.46E-01 | 9.22E-01 | 3.71E-01 |
| 666.78908 | 41.12  | 15.13 | 14.38 | 14.09 | 14.75 | 2.13E-04  | 1.22E-02 | 1.29E-04 | 4.16E-01 | 6.36E-01 | 4.83E-01 | 4.90E-02 |
| 666.8103  | 42.14  | 17.92 | 19.51 | 19.77 | 19.68 | 7.02E-33  | 2.53E-14 | 5.11E-15 | 7.99E-15 | 2.98E-01 | 7.01E-01 | 9.26E-01 |
| 666.91955 | 54.35  | 11.83 | 15.45 | 10.02 | 10.53 | 6.83E-101 | 5.11E-15 | 5.11E-15 | 4.44E-14 | 5.11E-15 | 5.11E-15 | 3.44E-03 |
| 666.93847 | 61.59  | 12.58 | 17.52 | 10.41 | 11.05 | 6.27E-144 | 5.11E-15 | 5.11E-15 | 5.11E-15 | 5.11E-15 | 5.11E-15 | 8.91E-07 |
| 667.3093  | 172.2  | 16.86 | 16.06 | 16.47 | 16.41 | 2.89E-08  | 3.26E-09 | 7.56E-03 | 2.16E-03 | 7.91E-03 | 4.26E-02 | 9.65E-01 |
| 667.34484 | 190.21 | 8.52  | 12.16 | 12.34 | 11.96 | 4.70E-15  | 1.89E-11 | 1.29E-12 | 5.47E-10 | 9.83E-01 | 9.82E-01 | 8.84E-01 |
| 667.71065 | 60.38  | 13.09 | 10.36 | 13.70 | 12.66 | 6.30E-28  | 3.66E-14 | 8.49E-02 | 3.80E-01 | 5.33E-15 | 7.33E-14 | 9.93E-04 |
| 667.73441 | 55.21  | 13.46 | 13.87 | 14.75 | 14.24 | 1.30E-05  | 3.80E-01 | 4.89E-06 | 1.68E-02 | 5.08E-03 | 5.12E-01 | 2.38E-01 |
| 667.78143 | 46.16  | 14.68 | 17.02 | 16.56 | 16.56 | 4.80E-31  | 5.11E-15 | 3.60E-14 | 4.16E-14 | 5.24E-02 | 6.48E-02 | 1.00E+00 |
| 667.81469 | 41.24  | 13.08 | 13.14 | 13.04 | 13.33 | 3.44E-01  | 9.83E-01 | 9.95E-01 | 4.29E-01 | 9.36E-01 | 6.72E-01 | 3.20E-01 |
| 667.86637 | 52.33  | 13.59 | 9.94  | 12.64 | 13.70 | 1.55E-20  | 4.25E-14 | 5.82E-02 | 9.90E-01 | 1.42E-10 | 4.21E-14 | 3.78E-02 |
| 667.96304 | 17.45  | 10.59 | 13.82 | 13.57 | 13.15 | 3.76E-23  | 4.01E-14 | 4.22E-14 | 3.26E-13 | 8.67E-01 | 1.74E-01 | 5.56E-01 |
| 667.97142 | 20.21  | 11.62 | 16.43 | 16.36 | 15.61 | 2.87E-38  | 5.11E-15 | 5.11E-15 | 1.49E-14 | 9.97E-01 | 1.07E-01 | 1.56E-01 |
| 668.28288 | 46.92  | 12.74 | 12.97 | 12.83 | 13.19 | 1.98E-02  | 3.69E-01 | 9.16E-01 | 1.36E-02 | 7.73E-01 | 4.82E-01 | 8.45E-02 |

|           |        |       |       |       |       |          |          |          |          |          |          |          |
|-----------|--------|-------|-------|-------|-------|----------|----------|----------|----------|----------|----------|----------|
| 668.30611 | 172.41 | 12.58 | 10.64 | 11.25 | 11.11 | 9.43E-08 | 6.17E-08 | 3.26E-04 | 1.07E-04 | 2.55E-01 | 5.12E-01 | 9.77E-01 |
| 668.31402 | 174.77 | 14.98 | 13.40 | 14.17 | 14.39 | 3.86E-14 | 4.69E-14 | 4.71E-05 | 8.20E-03 | 2.56E-04 | 2.67E-06 | 6.40E-01 |
| 668.70732 | 52.29  | 13.73 | 11.38 | 12.58 | 12.88 | 6.08E-28 | 5.11E-15 | 1.31E-09 | 2.12E-05 | 1.32E-09 | 3.25E-13 | 3.58E-01 |
| 668.72671 | 58.62  | 14.37 | 12.56 | 13.01 | 13.30 | 1.16E-14 | 4.98E-14 | 2.95E-09 | 7.91E-06 | 1.48E-01 | 5.43E-03 | 5.69E-01 |
| 668.74696 | 55.73  | 18.04 | 17.72 | 18.43 | 18.39 | 3.58E-14 | 2.89E-03 | 7.54E-05 | 7.57E-04 | 1.64E-12 | 8.78E-11 | 9.77E-01 |
| 668.76855 | 52.24  | 18.81 | 20.45 | 20.91 | 20.64 | 1.39E-40 | 6.00E-15 | 5.11E-15 | 5.11E-15 | 4.91E-03 | 5.67E-01 | 1.99E-01 |
| 668.80735 | 45.92  | 16.08 | 17.97 | 17.93 | 18.03 | 1.05E-35 | 5.11E-15 | 5.33E-15 | 5.11E-15 | 9.95E-01 | 9.84E-01 | 9.31E-01 |
| 668.91413 | 62.38  | 13.58 | 13.72 | 11.69 | 12.35 | 1.41E-69 | 3.18E-01 | 5.11E-15 | 5.11E-15 | 5.11E-15 | 5.11E-15 | 3.12E-11 |
| 668.92785 | 54.63  | 9.06  | 12.31 | 9.01  | 9.16  | 2.72E-23 | 4.19E-14 | 9.98E-01 | 9.91E-01 | 4.31E-14 | 4.37E-14 | 9.68E-01 |
| 669.13545 | 19.09  | 11.18 | 12.81 | 12.41 | 11.47 | 6.21E-04 | 1.22E-03 | 2.25E-02 | 9.13E-01 | 8.09E-01 | 1.96E-02 | 1.62E-01 |
| 669.32128 | 174.76 | 11.11 | 11.09 | 12.84 | 10.22 | 2.32E-06 | 1.00E+00 | 1.11E-03 | 2.43E-01 | 1.43E-03 | 2.85E-01 | 9.00E-07 |
| 669.44239 | 283.52 | 12.94 | 14.37 | 13.21 | 12.11 | 1.51E-06 | 1.26E-03 | 8.95E-01 | 1.46E-01 | 1.60E-02 | 3.19E-07 | 3.16E-02 |
| 669.45282 | 281.63 | 16.30 | 19.13 | 18.62 | 17.97 | 2.44E-08 | 2.84E-08 | 5.86E-06 | 3.14E-03 | 6.98E-01 | 8.45E-02 | 5.41E-01 |
| 669.7536  | 43.79  | 14.22 | 14.30 | 13.78 | 14.14 | 2.42E-04 | 9.21E-01 | 1.82E-03 | 9.12E-01 | 2.54E-04 | 5.99E-01 | 2.72E-02 |
| 669.77481 | 50.12  | 14.76 | 16.40 | 16.52 | 16.49 | 2.04E-32 | 1.51E-14 | 5.77E-15 | 8.88E-15 | 8.35E-01 | 9.17E-01 | 9.98E-01 |
| 669.84681 | 36.63  | 14.28 | 15.51 | 15.43 | 14.90 | 8.89E-11 | 1.42E-09 | 1.11E-08 | 7.30E-03 | 9.75E-01 | 1.03E-02 | 3.21E-02 |
| 669.9344  | 49.6   | 11.34 | 12.26 | 11.69 | 11.44 | 1.57E-04 | 1.27E-04 | 3.45E-01 | 9.64E-01 | 4.40E-02 | 1.83E-03 | 6.84E-01 |
| 670.3343  | 207.05 | 17.72 | 17.59 | 17.66 | 17.52 | 6.10E-01 | 8.21E-01 | 9.85E-01 | 5.87E-01 | 9.56E-01 | 9.77E-01 | 8.00E-01 |
| 670.45889 | 283.04 | 13.23 | 16.23 | 14.87 | 14.64 | 1.47E-05 | 2.55E-06 | 2.28E-02 | 8.31E-02 | 9.75E-02 | 4.58E-02 | 9.81E-01 |
| 670.70557 | 56.45  | 19.79 | 20.19 | 21.06 | 20.77 | 4.52E-25 | 2.01E-03 | 1.42E-14 | 5.13E-14 | 4.22E-12 | 8.17E-06 | 7.32E-02 |
| 670.72733 | 58.38  | 16.29 | 16.16 | 17.02 | 16.84 | 2.77E-18 | 5.84E-01 | 4.56E-12 | 4.09E-07 | 5.12E-14 | 1.48E-09 | 3.08E-01 |
| 670.74637 | 55.77  | 16.73 | 15.94 | 16.76 | 16.80 | 1.23E-17 | 2.35E-13 | 9.91E-01 | 8.86E-01 | 1.31E-13 | 7.42E-14 | 9.73E-01 |
| 670.76708 | 51.83  | 17.00 | 18.64 | 19.23 | 18.92 | 5.00E-37 | 3.09E-14 | 5.11E-15 | 5.77E-15 | 7.79E-04 | 2.85E-01 | 1.94E-01 |
| 670.8012  | 31.85  | 13.60 | 12.43 | 12.58 | 12.97 | 2.80E-05 | 3.93E-05 | 4.14E-04 | 7.32E-02 | 9.34E-01 | 1.89E-01 | 4.74E-01 |
| 670.87975 | 42.65  | 12.18 | 12.43 | 12.82 | 12.85 | 1.79E-01 | 8.87E-01 | 2.52E-01 | 2.40E-01 | 6.98E-01 | 6.64E-01 | 1.00E+00 |
| 670.90159 | 36.52  | 9.95  | 12.28 | 11.59 | 11.53 | 3.07E-06 | 1.42E-06 | 1.10E-03 | 2.77E-03 | 4.12E-01 | 3.71E-01 | 9.99E-01 |
| 671.07368 | 17.59  | 10.02 | 12.69 | 12.43 | 11.55 | 6.85E-08 | 2.34E-07 | 2.73E-06 | 8.99E-03 | 9.51E-01 | 1.01E-01 | 2.76E-01 |
| 671.08531 | 22.44  | 13.09 | 13.66 | 13.68 | 13.57 | 1.37E-01 | 2.00E-01 | 1.69E-01 | 3.68E-01 | 1.00E+00 | 9.91E-01 | 9.84E-01 |
| 671.15095 | 64.45  | 10.53 | 12.69 | 9.31  | 9.64  | 9.78E-57 | 5.11E-15 | 1.79E-12 | 6.36E-07 | 5.11E-15 | 5.11E-15 | 2.03E-01 |
| 671.33793 | 202.41 | 15.39 | 13.46 | 13.61 | 13.97 | 1.15E-15 | 1.13E-13 | 2.21E-12 | 5.96E-08 | 9.28E-01 | 1.69E-01 | 4.50E-01 |
| 671.46659 | 290.95 | 18.35 | 21.31 | 20.89 | 20.66 | 2.04E-15 | 8.46E-14 | 4.43E-11 | 6.70E-09 | 6.44E-01 | 3.04E-01 | 9.28E-01 |
| 671.70914 | 57.18  | 15.95 | 15.73 | 17.31 | 16.94 | 7.73E-28 | 3.67E-01 | 4.25E-14 | 1.08E-10 | 1.75E-14 | 7.15E-14 | 5.15E-02 |
| 671.76909 | 51.54  | 12.51 | 13.44 | 13.80 | 13.71 | 4.57E-07 | 1.05E-03 | 1.37E-06 | 1.80E-05 | 4.65E-01 | 7.17E-01 | 9.84E-01 |
| 671.86534 | 58.11  | 11.75 | 12.35 | 13.15 | 13.11 | 1.07E-10 | 3.03E-02 | 2.71E-09 | 2.62E-08 | 2.07E-03 | 5.83E-03 | 9.98E-01 |
| 671.95171 | 47.93  | 12.39 | 11.97 | 11.35 | 12.64 | 6.22E-06 | 3.41E-01 | 2.06E-04 | 7.43E-01 | 6.90E-02 | 5.25E-02 | 7.21E-06 |
| 672.2928  | 204.54 | 17.26 | 18.57 | 18.71 | 18.12 | 1.14E-19 | 4.69E-14 | 4.24E-14 | 4.25E-07 | 8.03E-01 | 2.49E-02 | 1.28E-03 |
| 672.47001 | 293.21 | 15.96 | 19.82 | 19.19 | 19.02 | 1.47E-17 | 4.37E-14 | 3.09E-12 | 1.62E-10 | 4.78E-01 | 2.88E-01 | 9.80E-01 |
| 672.66626 | 68.63  | 10.18 | 8.48  | 11.52 | 11.19 | 2.97E-09 | 1.84E-03 | 2.14E-02 | 1.57E-01 | 5.83E-09 | 6.25E-07 | 9.02E-01 |
| 672.70385 | 56.57  | 18.77 | 19.06 | 20.03 | 19.74 | 7.54E-23 | 8.95E-02 | 3.67E-14 | 1.03E-12 | 7.13E-13 | 9.27E-07 | 1.09E-01 |
| 672.72616 | 60.59  | 14.03 | 12.95 | 13.06 | 13.38 | 4.54E-14 | 6.64E-13 | 5.92E-11 | 3.26E-05 | 8.55E-01 | 1.61E-02 | 1.15E-01 |
| 672.74247 | 54.8   | 13.93 | 11.86 | 13.32 | 13.55 | 1.31E-12 | 1.01E-12 | 9.59E-02 | 5.07E-01 | 7.83E-07 | 2.72E-08 | 8.37E-01 |
| 672.7536  | 47.46  | 13.68 | 12.82 | 13.00 | 13.23 | 1.07E-03 | 7.72E-04 | 1.13E-02 | 1.95E-01 | 8.59E-01 | 3.01E-01 | 7.54E-01 |
| 672.76368 | 52.4   | 14.06 | 12.56 | 12.70 | 13.10 | 2.63E-23 | 3.46E-14 | 4.26E-14 | 1.12E-09 | 7.40E-01 | 1.65E-03 | 3.51E-02 |
| 672.79877 | 39.72  | 11.91 | 12.54 | 12.37 | 12.41 | 1.66E-01 | 1.47E-01 | 4.00E-01 | 3.65E-01 | 9.42E-01 | 9.72E-01 | 9.99E-01 |
| 672.8155  | 32.88  | 12.84 | 13.11 | 13.38 | 13.21 | 5.14E-01 | 8.87E-01 | 4.45E-01 | 7.52E-01 | 8.83E-01 | 9.92E-01 | 9.72E-01 |

|           |        |       |       |       |       |          |          |          |          |          |          |          |
|-----------|--------|-------|-------|-------|-------|----------|----------|----------|----------|----------|----------|----------|
| 672.83898 | 43.09  | 15.92 | 18.04 | 17.73 | 18.00 | 8.16E-22 | 4.44E-14 | 7.39E-14 | 4.16E-14 | 4.98E-01 | 9.97E-01 | 6.44E-01 |
| 672.85965 | 42.67  | 14.47 | 16.92 | 16.48 | 16.58 | 2.41E-17 | 4.53E-14 | 2.15E-11 | 1.10E-11 | 3.90E-01 | 6.43E-01 | 9.84E-01 |
| 673.12925 | 65.33  | 8.71  | 13.02 | 8.40  | 8.95  | 8.46E-51 | 5.11E-15 | 5.85E-01 | 7.93E-01 | 5.11E-15 | 5.11E-15 | 1.55E-01 |
| 673.29605 | 206.49 | 15.22 | 16.30 | 16.51 | 15.64 | 1.16E-07 | 3.52E-05 | 3.93E-07 | 2.88E-01 | 8.14E-01 | 4.01E-02 | 2.59E-03 |
| 673.47848 | 285.41 | 16.46 | 16.96 | 17.34 | 17.04 | 1.36E-01 | 5.49E-01 | 9.02E-02 | 4.39E-01 | 7.58E-01 | 9.97E-01 | 8.75E-01 |
| 673.50481 | 278.65 | 15.97 | 12.84 | 13.94 | 13.97 | 3.11E-11 | 6.95E-12 | 8.84E-06 | 2.68E-05 | 4.93E-02 | 5.09E-02 | 1.00E+00 |
| 673.70805 | 51     | 13.24 | 11.11 | 12.34 | 12.88 | 2.52E-12 | 1.83E-12 | 6.26E-03 | 5.76E-01 | 9.28E-05 | 2.55E-08 | 2.47E-01 |
| 673.71998 | 56.28  | 13.74 | 12.79 | 13.78 | 13.60 | 4.38E-15 | 1.20E-12 | 9.86E-01 | 6.86E-01 | 4.21E-13 | 7.08E-09 | 4.92E-01 |
| 673.79995 | 43.48  | 12.84 | 13.37 | 12.29 | 13.04 | 4.95E-03 | 2.66E-01 | 2.44E-01 | 9.11E-01 | 2.22E-03 | 7.01E-01 | 7.64E-02 |
| 673.86774 | 54.62  | 11.83 | 9.81  | 12.55 | 12.15 | 3.68E-07 | 2.25E-04 | 4.41E-01 | 9.18E-01 | 4.42E-07 | 4.06E-05 | 8.61E-01 |
| 674.29032 | 199.98 | 13.71 | 12.67 | 12.42 | 12.99 | 9.84E-10 | 1.12E-06 | 9.80E-10 | 2.05E-03 | 6.02E-01 | 3.93E-01 | 2.82E-02 |
| 674.70259 | 58     | 15.95 | 15.66 | 17.10 | 16.71 | 4.50E-28 | 7.63E-02 | 4.22E-14 | 8.64E-09 | 7.77E-15 | 7.08E-14 | 1.11E-02 |
| 674.71848 | 55.7   | 14.23 | 13.24 | 14.43 | 14.27 | 1.35E-30 | 2.80E-14 | 1.09E-01 | 9.78E-01 | 5.11E-15 | 3.44E-14 | 2.98E-01 |
| 674.7288  | 51.28  | 13.93 | 12.03 | 12.36 | 12.79 | 1.27E-16 | 4.27E-14 | 8.58E-12 | 1.96E-06 | 4.02E-01 | 3.79E-03 | 2.11E-01 |
| 674.77588 | 54.36  | 14.50 | 11.62 | 10.66 | 12.30 | 2.68E-16 | 4.28E-10 | 4.29E-14 | 4.29E-06 | 1.17E-01 | 4.20E-01 | 1.41E-03 |
| 674.79767 | 44.89  | 18.78 | 21.29 | 21.11 | 21.03 | 4.92E-40 | 5.11E-15 | 5.11E-15 | 5.11E-15 | 7.31E-01 | 4.67E-01 | 9.67E-01 |
| 675.04326 | 20.16  | 11.86 | 12.33 | 12.20 | 12.36 | 2.29E-01 | 2.95E-01 | 5.57E-01 | 2.64E-01 | 9.69E-01 | 1.00E+00 | 9.46E-01 |
| 675.10511 | 26.76  | 14.53 | 11.18 | 11.96 | 11.10 | 8.89E-18 | 5.13E-14 | 1.31E-09 | 5.38E-14 | 2.03E-01 | 9.98E-01 | 1.53E-01 |
| 675.49525 | 280.81 | 14.41 | 15.48 | 14.84 | 16.05 | 4.93E-05 | 1.22E-02 | 5.96E-01 | 4.07E-05 | 2.72E-01 | 4.05E-01 | 5.48E-03 |
| 675.71923 | 57.31  | 13.31 | 11.88 | 12.77 | 12.92 | 3.99E-13 | 1.09E-13 | 8.50E-03 | 1.20E-01 | 6.17E-06 | 2.23E-07 | 8.30E-01 |
| 675.76796 | 47.62  | 14.29 | 17.07 | 16.70 | 16.64 | 5.57E-33 | 5.11E-15 | 1.15E-14 | 2.93E-14 | 3.10E-01 | 2.00E-01 | 9.90E-01 |
| 675.80103 | 45.39  | 15.05 | 17.44 | 17.31 | 17.32 | 2.41E-35 | 5.11E-15 | 5.33E-15 | 6.00E-15 | 8.75E-01 | 9.16E-01 | 1.00E+00 |
| 676.26657 | 47.92  | 11.23 | 12.79 | 12.17 | 12.90 | 1.67E-12 | 3.52E-10 | 2.50E-04 | 6.07E-11 | 3.76E-02 | 9.67E-01 | 1.18E-02 |
| 676.30644 | 203.31 | 13.59 | 10.88 | 11.40 | 11.90 | 5.53E-06 | 4.77E-06 | 2.82E-04 | 1.20E-02 | 7.75E-01 | 2.71E-01 | 8.08E-01 |
| 676.34552 | 186.43 | 12.72 | 12.77 | 13.32 | 13.60 | 3.78E-02 | 9.99E-01 | 2.84E-01 | 6.18E-02 | 3.93E-01 | 1.04E-01 | 8.69E-01 |
| 676.69523 | 61.74  | 14.21 | 11.53 | 14.23 | 13.58 | 1.25E-24 | 3.15E-14 | 1.00E+00 | 6.53E-02 | 3.33E-14 | 8.90E-13 | 6.01E-02 |
| 676.71605 | 58.24  | 13.94 | 12.01 | 13.04 | 13.46 | 8.74E-13 | 2.58E-13 | 9.43E-04 | 1.98E-01 | 2.03E-04 | 1.68E-07 | 3.33E-01 |
| 676.73451 | 45.57  | 18.55 | 19.01 | 18.63 | 18.57 | 1.20E-03 | 1.57E-03 | 8.98E-01 | 9.97E-01 | 1.87E-02 | 6.09E-03 | 9.68E-01 |
| 676.76959 | 48.67  | 14.34 | 15.96 | 15.58 | 15.64 | 6.34E-19 | 4.26E-14 | 1.08E-11 | 6.38E-12 | 1.21E-01 | 2.71E-01 | 9.87E-01 |
| 676.79468 | 40     | 17.13 | 19.39 | 19.23 | 19.23 | 1.74E-33 | 5.11E-15 | 7.11E-15 | 1.15E-14 | 8.09E-01 | 8.10E-01 | 1.00E+00 |
| 676.84827 | 42.09  | 11.32 | 11.61 | 12.30 | 12.81 | 9.14E-05 | 8.31E-01 | 1.86E-02 | 1.23E-04 | 1.81E-01 | 4.06E-03 | 4.54E-01 |
| 677.06503 | 24.94  | 10.85 | 11.68 | 11.51 | 11.97 | 3.45E-03 | 3.43E-02 | 1.26E-01 | 2.22E-03 | 9.50E-01 | 7.98E-01 | 4.72E-01 |
| 677.08859 | 29.81  | 11.83 | 11.37 | 11.51 | 12.65 | 1.25E-03 | 4.81E-01 | 7.41E-01 | 6.75E-02 | 9.75E-01 | 1.24E-03 | 4.65E-03 |
| 677.45623 | 227.02 | 16.30 | 11.69 | 14.71 | 16.32 | 4.96E-32 | 5.11E-15 | 4.73E-05 | 1.00E+00 | 7.34E-14 | 5.33E-15 | 9.90E-05 |
| 677.53744 | 274.1  | 15.67 | 12.27 | 13.02 | 13.50 | 1.74E-06 | 1.23E-06 | 2.07E-04 | 5.46E-03 | 6.54E-01 | 2.58E-01 | 8.87E-01 |
| 677.73927 | 52.19  | 13.81 | 13.60 | 13.36 | 13.55 | 1.59E-03 | 2.60E-01 | 4.80E-04 | 1.21E-01 | 1.58E-01 | 9.75E-01 | 3.69E-01 |
| 677.76531 | 41.88  | 11.17 | 12.81 | 12.57 | 12.73 | 6.77E-09 | 1.15E-07 | 6.28E-06 | 9.64E-07 | 8.35E-01 | 9.94E-01 | 9.45E-01 |
| 677.79164 | 46.79  | 11.89 | 12.78 | 12.37 | 12.50 | 2.56E-02 | 1.43E-02 | 3.57E-01 | 1.75E-01 | 5.14E-01 | 8.12E-01 | 9.70E-01 |
| 677.80205 | 45.03  | 12.37 | 13.82 | 13.44 | 13.94 | 9.01E-10 | 6.55E-08 | 9.58E-05 | 1.17E-08 | 4.13E-01 | 9.68E-01 | 2.03E-01 |
| 678.40096 | 188.62 | 12.61 | 14.22 | 14.98 | 12.61 | 1.01E-10 | 1.95E-04 | 9.13E-09 | 1.00E+00 | 2.01E-01 | 4.43E-04 | 5.07E-08 |
| 678.4596  | 227.17 | 14.10 | 10.24 | 11.58 | 14.11 | 1.45E-25 | 3.53E-14 | 1.46E-10 | 1.00E+00 | 1.95E-03 | 4.12E-14 | 1.06E-09 |
| 678.67195 | 71.15  | 15.78 | 14.68 | 16.39 | 15.90 | 6.39E-25 | 5.90E-13 | 6.09E-05 | 8.31E-01 | 6.22E-15 | 8.49E-14 | 3.82E-03 |
| 678.73247 | 56.66  | 14.90 | 14.13 | 14.13 | 14.29 | 7.50E-12 | 6.68E-10 | 5.19E-10 | 2.03E-06 | 1.00E+00 | 5.59E-01 | 5.64E-01 |
| 678.75021 | 44.48  | 19.08 | 20.34 | 20.40 | 20.23 | 2.46E-40 | 5.11E-15 | 5.11E-15 | 5.33E-15 | 8.78E-01 | 6.78E-01 | 2.50E-01 |
| 678.7776  | 45.66  | 12.74 | 12.36 | 11.99 | 12.67 | 4.87E-02 | 5.50E-01 | 4.75E-02 | 9.96E-01 | 6.04E-01 | 7.33E-01 | 1.15E-01 |

|           |        |       |       |       |       |           |          |          |          |          |          |          |
|-----------|--------|-------|-------|-------|-------|-----------|----------|----------|----------|----------|----------|----------|
| 678.785   | 40.27  | 14.05 | 13.00 | 12.89 | 13.24 | 3.76E-09  | 4.26E-07 | 1.59E-08 | 2.28E-04 | 9.43E-01 | 6.25E-01 | 2.95E-01 |
| 678.8085  | 44.52  | 14.24 | 17.45 | 17.52 | 17.53 | 2.31E-34  | 5.77E-15 | 5.33E-15 | 5.77E-15 | 9.95E-01 | 9.92E-01 | 1.00E+00 |
| 679.11736 | 64.49  | 12.64 | 16.23 | 10.50 | 11.16 | 2.56E-123 | 5.11E-15 | 5.11E-15 | 5.33E-15 | 5.11E-15 | 5.11E-15 | 6.02E-07 |
| 679.54833 | 289.26 | 15.46 | 11.21 | 11.37 | 12.24 | 2.15E-34  | 5.11E-15 | 5.11E-15 | 4.11E-14 | 9.56E-01 | 1.22E-02 | 4.69E-02 |
| 679.75516 | 45.99  | 13.96 | 13.47 | 13.61 | 13.71 | 3.31E-05  | 1.33E-05 | 3.19E-03 | 6.66E-02 | 5.21E-01 | 1.27E-01 | 8.14E-01 |
| 679.78752 | 44.42  | 15.18 | 15.76 | 14.91 | 15.15 | 2.70E-03  | 4.77E-02 | 6.12E-01 | 9.99E-01 | 1.32E-03 | 4.65E-02 | 7.43E-01 |
| 680.12554 | 64.98  | 12.45 | 12.86 | 10.45 | 11.10 | 1.48E-64  | 9.84E-04 | 5.11E-15 | 5.77E-15 | 5.11E-15 | 5.11E-15 | 8.11E-08 |
| 680.31883 | 202.4  | 17.71 | 17.73 | 18.01 | 18.15 | 6.83E-04  | 9.96E-01 | 5.39E-02 | 2.13E-03 | 1.10E-01 | 6.20E-03 | 6.79E-01 |
| 680.37857 | 189.62 | 13.56 | 14.00 | 15.33 | 13.85 | 1.01E-06  | 5.36E-01 | 8.41E-07 | 8.31E-01 | 5.71E-04 | 9.70E-01 | 1.38E-04 |
| 680.66594 | 73.03  | 11.93 | 9.42  | 11.84 | 11.63 | 2.50E-19  | 4.35E-14 | 9.86E-01 | 6.85E-01 | 4.46E-14 | 1.61E-12 | 8.72E-01 |
| 680.6852  | 67.27  | 16.35 | 15.40 | 17.18 | 16.74 | 4.23E-25  | 2.03E-09 | 1.10E-07 | 3.98E-02 | 6.88E-15 | 4.44E-14 | 2.07E-02 |
| 680.74699 | 46.98  | 18.03 | 19.02 | 19.05 | 18.89 | 1.59E-34  | 5.11E-15 | 5.11E-15 | 3.04E-14 | 9.70E-01 | 4.00E-01 | 1.85E-01 |
| 680.78509 | 40.06  | 12.70 | 13.10 | 12.92 | 13.26 | 1.68E-02  | 1.06E-01 | 5.72E-01 | 1.21E-02 | 7.58E-01 | 8.34E-01 | 2.71E-01 |
| 680.80526 | 49.24  | 14.07 | 12.89 | 12.72 | 13.72 | 2.63E-06  | 2.40E-04 | 1.51E-05 | 6.18E-01 | 9.35E-01 | 2.95E-02 | 4.68E-03 |
| 680.82583 | 43.54  | 16.61 | 17.58 | 17.34 | 17.76 | 2.95E-09  | 7.30E-07 | 2.41E-04 | 9.12E-09 | 5.65E-01 | 7.76E-01 | 1.19E-01 |
| 680.84589 | 44.43  | 12.35 | 12.66 | 12.89 | 13.23 | 1.14E-02  | 6.41E-01 | 1.58E-01 | 6.27E-03 | 8.15E-01 | 1.60E-01 | 5.97E-01 |
| 680.97137 | 60.09  | 12.91 | 14.64 | 10.73 | 11.63 | 1.90E-70  | 7.99E-15 | 5.11E-15 | 5.75E-14 | 5.11E-15 | 5.11E-15 | 5.73E-08 |
| 681.11926 | 65.25  | 10.18 | 13.21 | 8.32  | 8.70  | 2.78E-40  | 4.31E-14 | 1.58E-08 | 1.81E-05 | 5.11E-15 | 5.11E-15 | 6.40E-01 |
| 681.29734 | 244.42 | 16.93 | 18.52 | 19.00 | 17.59 | 9.05E-24  | 6.10E-14 | 2.42E-14 | 3.86E-03 | 6.79E-02 | 2.43E-05 | 6.66E-11 |
| 681.32239 | 202.46 | 15.80 | 14.18 | 15.08 | 15.74 | 1.43E-10  | 8.53E-10 | 1.47E-02 | 9.95E-01 | 1.77E-03 | 2.17E-08 | 4.50E-02 |
| 681.51093 | 232.42 | 20.39 | 21.10 | 21.56 | 20.78 | 9.44E-03  | 1.88E-01 | 4.82E-03 | 7.00E-01 | 5.59E-01 | 8.31E-01 | 1.46E-01 |
| 681.70859 | 57.67  | 13.73 | 12.61 | 13.82 | 13.71 | 2.99E-22  | 4.16E-14 | 8.43E-01 | 1.00E+00 | 4.20E-14 | 4.53E-14 | 8.22E-01 |
| 681.75166 | 51.77  | 13.50 | 12.98 | 12.95 | 13.58 | 3.99E-03  | 7.29E-02 | 4.81E-02 | 9.78E-01 | 9.99E-01 | 3.69E-02 | 2.38E-02 |
| 681.78996 | 45.65  | 12.45 | 12.85 | 11.52 | 12.78 | 1.72E-03  | 6.95E-01 | 5.16E-02 | 8.19E-01 | 2.45E-03 | 9.98E-01 | 6.24E-03 |
| 682.30067 | 244.81 | 13.51 | 16.51 | 17.04 | 15.37 | 7.92E-26  | 4.10E-14 | 9.77E-15 | 4.24E-08 | 3.16E-01 | 2.53E-03 | 1.93E-06 |
| 682.33408 | 206.98 | 14.72 | 12.74 | 12.11 | 13.07 | 3.58E-11  | 5.59E-07 | 2.00E-11 | 6.82E-05 | 3.02E-01 | 8.20E-01 | 5.10E-02 |
| 682.36018 | 165.69 | 11.66 | 15.82 | 16.59 | 11.50 | 6.79E-29  | 4.53E-14 | 3.69E-14 | 9.87E-01 | 3.79E-01 | 4.46E-14 | 4.12E-14 |
| 682.5133  | 232.65 | 19.28 | 19.90 | 20.40 | 19.71 | 5.95E-03  | 2.04E-01 | 2.33E-03 | 5.53E-01 | 4.08E-01 | 9.37E-01 | 1.55E-01 |
| 682.68523 | 66.59  | 15.07 | 12.40 | 15.48 | 15.06 | 9.74E-38  | 5.11E-15 | 1.73E-01 | 1.00E+00 | 5.11E-15 | 5.77E-15 | 1.93E-01 |
| 682.70696 | 57.86  | 14.09 | 13.29 | 15.03 | 14.72 | 1.13E-20  | 1.15E-05 | 1.85E-07 | 1.53E-03 | 4.09E-14 | 1.41E-13 | 2.73E-01 |
| 682.74167 | 34.16  | 13.97 | 13.35 | 13.39 | 13.81 | 1.89E-03  | 6.13E-03 | 1.13E-02 | 8.39E-01 | 9.96E-01 | 9.65E-02 | 1.47E-01 |
| 682.76287 | 49.38  | 14.75 | 13.68 | 13.94 | 14.66 | 4.35E-03  | 1.05E-02 | 8.21E-02 | 9.95E-01 | 8.76E-01 | 3.41E-02 | 1.83E-01 |
| 682.78393 | 50.87  | 17.78 | 18.86 | 19.38 | 19.24 | 4.22E-33  | 4.17E-14 | 5.11E-15 | 7.33E-15 | 1.54E-04 | 1.60E-02 | 6.49E-01 |
| 682.82309 | 41.29  | 12.54 | 12.52 | 12.30 | 13.19 | 7.93E-02  | 1.00E+00 | 8.79E-01 | 2.41E-01 | 9.13E-01 | 2.35E-01 | 5.56E-02 |
| 682.88218 | 52.93  | 12.97 | 14.04 | 10.95 | 11.63 | 2.56E-81  | 4.06E-14 | 5.11E-15 | 5.33E-15 | 5.11E-15 | 5.11E-15 | 6.06E-09 |
| 682.89045 | 55.21  | 13.18 | 13.02 | 11.30 | 11.90 | 1.93E-51  | 4.39E-01 | 5.11E-15 | 7.77E-15 | 5.11E-15 | 4.22E-14 | 3.98E-07 |
| 682.90719 | 62.52  | 12.66 | 16.16 | 10.63 | 11.57 | 2.39E-91  | 5.11E-15 | 5.11E-15 | 7.97E-10 | 5.11E-15 | 5.11E-15 | 2.33E-07 |
| 683.08059 | 19.29  | 8.82  | 14.04 | 12.96 | 10.94 | 2.45E-30  | 5.11E-15 | 3.69E-14 | 2.51E-06 | 4.21E-02 | 1.72E-11 | 1.25E-05 |
| 683.28239 | 172.49 | 13.83 | 14.07 | 14.85 | 13.88 | 3.30E-04  | 7.87E-01 | 4.72E-04 | 9.98E-01 | 1.67E-02 | 8.93E-01 | 2.02E-03 |
| 683.52143 | 235.69 | 18.88 | 18.95 | 19.39 | 19.26 | 2.09E-01  | 9.94E-01 | 2.41E-01 | 5.34E-01 | 3.94E-01 | 7.07E-01 | 9.68E-01 |
| 683.70756 | 50.71  | 12.81 | 10.51 | 12.37 | 12.22 | 4.79E-13  | 4.71E-13 | 3.99E-01 | 1.82E-01 | 8.77E-09 | 3.56E-07 | 9.59E-01 |
| 683.75317 | 48.97  | 14.20 | 15.48 | 15.15 | 14.99 | 1.47E-18  | 4.09E-14 | 1.51E-11 | 6.94E-08 | 5.72E-02 | 1.83E-03 | 6.21E-01 |
| 683.78436 | 48.55  | 12.48 | 12.56 | 12.77 | 12.97 | 2.53E-01  | 9.89E-01 | 6.56E-01 | 2.41E-01 | 8.50E-01 | 4.25E-01 | 8.78E-01 |
| 684.28383 | 172.23 | 8.87  | 9.85  | 10.20 | 9.63  | 4.38E-03  | 4.72E-02 | 2.34E-03 | 1.96E-01 | 7.94E-01 | 9.49E-01 | 4.73E-01 |
| 684.34968 | 197.84 | 15.28 | 13.56 | 14.41 | 13.52 | 7.43E-08  | 1.15E-06 | 3.13E-02 | 1.16E-06 | 5.02E-02 | 9.99E-01 | 4.19E-02 |

|           |        |       |       |       |       |          |          |          |          |          |          |          |
|-----------|--------|-------|-------|-------|-------|----------|----------|----------|----------|----------|----------|----------|
| 684.52929 | 238.52 | 16.71 | 17.00 | 17.46 | 17.38 | 1.24E-01 | 8.41E-01 | 1.33E-01 | 2.49E-01 | 5.64E-01 | 7.36E-01 | 9.95E-01 |
| 684.67905 | 63.46  | 13.79 | 10.39 | 12.41 | 12.46 | 5.16E-51 | 5.11E-15 | 5.33E-14 | 6.40E-13 | 6.88E-15 | 7.33E-15 | 9.87E-01 |
| 684.69942 | 63.68  | 14.02 | 11.10 | 12.86 | 12.86 | 1.86E-27 | 5.11E-15 | 1.38E-06 | 3.38E-06 | 1.25E-12 | 5.82E-12 | 1.00E+00 |
| 684.7205  | 57.32  | 17.08 | 16.22 | 17.54 | 17.41 | 2.72E-22 | 1.36E-10 | 6.99E-04 | 3.78E-02 | 3.46E-14 | 4.23E-14 | 7.13E-01 |
| 684.74273 | 54.34  | 18.41 | 19.34 | 20.13 | 19.86 | 2.99E-35 | 1.11E-12 | 5.11E-15 | 7.77E-15 | 1.88E-09 | 2.50E-04 | 1.20E-01 |
| 684.78105 | 48.07  | 16.52 | 17.91 | 17.89 | 17.98 | 3.82E-36 | 5.11E-15 | 5.11E-15 | 5.11E-15 | 9.99E-01 | 9.37E-01 | 8.83E-01 |
| 684.8991  | 53.42  | 9.63  | 12.81 | 9.86  | 10.58 | 3.08E-12 | 1.60E-11 | 9.51E-01 | 1.37E-01 | 7.97E-10 | 9.97E-06 | 3.71E-01 |
| 684.90899 | 61.47  | 9.55  | 14.06 | 9.73  | 9.94  | 2.82E-35 | 5.11E-15 | 9.48E-01 | 6.64E-01 | 5.11E-15 | 7.77E-15 | 9.31E-01 |
| 685.35629 | 179.34 | 11.44 | 12.33 | 12.83 | 9.15  | 9.58E-11 | 2.84E-01 | 2.74E-02 | 6.96E-05 | 7.60E-01 | 3.68E-08 | 1.29E-10 |
| 685.51934 | 246.89 | 15.71 | 15.13 | 15.55 | 15.30 | 2.09E-01 | 1.94E-01 | 9.49E-01 | 5.10E-01 | 4.84E-01 | 9.49E-01 | 8.32E-01 |
| 685.53284 | 244.41 | 20.03 | 19.37 | 19.58 | 19.74 | 2.65E-08 | 7.90E-09 | 1.32E-04 | 3.55E-02 | 1.90E-01 | 5.02E-03 | 4.79E-01 |
| 685.72944 | 47.68  | 13.85 | 12.99 | 12.84 | 13.09 | 5.55E-11 | 7.70E-08 | 2.29E-10 | 4.87E-06 | 7.69E-01 | 9.10E-01 | 3.73E-01 |
| 685.74188 | 55.21  | 13.15 | 12.47 | 13.09 | 13.11 | 3.85E-05 | 1.02E-04 | 9.81E-01 | 9.94E-01 | 6.53E-04 | 6.96E-04 | 9.99E-01 |
| 685.75019 | 52     | 14.52 | 15.66 | 15.79 | 15.69 | 4.55E-18 | 1.06E-12 | 4.44E-14 | 1.11E-12 | 8.18E-01 | 9.98E-01 | 9.11E-01 |
| 685.79625 | 43.91  | 12.45 | 13.89 | 13.04 | 13.56 | 1.18E-04 | 8.50E-05 | 2.55E-01 | 5.64E-03 | 5.44E-02 | 7.67E-01 | 4.29E-01 |
| 685.81179 | 32.02  | 12.74 | 12.12 | 12.06 | 12.08 | 1.68E-02 | 6.05E-02 | 3.07E-02 | 5.05E-02 | 9.96E-01 | 9.99E-01 | 1.00E+00 |
| 685.82139 | 38.27  | 13.79 | 13.50 | 13.46 | 13.33 | 1.41E-02 | 1.75E-01 | 8.19E-02 | 9.95E-03 | 9.89E-01 | 6.73E-01 | 8.42E-01 |
| 685.90272 | 51.64  | 11.03 | 12.49 | 12.73 | 11.92 | 2.02E-10 | 1.33E-07 | 5.17E-10 | 3.82E-03 | 7.87E-01 | 1.39E-01 | 1.23E-02 |
| 686.05048 | 17.03  | 11.15 | 14.56 | 13.53 | 13.34 | 2.34E-27 | 5.11E-15 | 4.29E-14 | 4.04E-13 | 1.07E-03 | 1.30E-04 | 9.10E-01 |
| 686.14278 | 19.01  | 15.90 | 13.40 | 13.76 | 13.51 | 2.52E-13 | 2.62E-11 | 8.21E-09 | 5.28E-10 | 7.27E-01 | 9.89E-01 | 8.99E-01 |
| 686.30815 | 207.4  | 14.99 | 15.85 | 16.26 | 15.07 | 2.99E-06 | 7.89E-03 | 1.58E-05 | 9.90E-01 | 4.27E-01 | 3.16E-02 | 1.72E-04 |
| 686.5208  | 242.93 | 14.49 | 13.17 | 13.16 | 13.53 | 1.88E-12 | 2.03E-10 | 9.03E-11 | 9.06E-06 | 1.00E+00 | 2.71E-01 | 2.33E-01 |
| 686.53507 | 244.01 | 18.63 | 17.92 | 18.16 | 18.32 | 1.20E-07 | 3.41E-08 | 3.49E-04 | 5.08E-02 | 2.02E-01 | 7.57E-03 | 5.38E-01 |
| 686.67939 | 57.54  | 17.87 | 17.93 | 19.19 | 18.81 | 5.38E-19 | 9.79E-01 | 4.31E-14 | 2.74E-08 | 1.43E-13 | 4.48E-07 | 7.74E-02 |
| 686.7003  | 60.1   | 16.52 | 15.99 | 17.51 | 17.15 | 2.83E-31 | 1.69E-05 | 4.29E-14 | 4.82E-07 | 5.11E-15 | 4.12E-14 | 1.20E-02 |
| 686.7204  | 58.4   | 16.19 | 14.54 | 16.23 | 16.19 | 3.64E-46 | 5.11E-15 | 9.66E-01 | 1.00E+00 | 5.11E-15 | 5.11E-15 | 9.79E-01 |
| 686.74072 | 54.29  | 16.85 | 17.80 | 18.68 | 18.36 | 2.26E-30 | 4.37E-10 | 5.11E-15 | 3.73E-14 | 1.41E-08 | 9.22E-04 | 1.25E-01 |
| 686.76962 | 43.81  | 12.92 | 13.25 | 13.38 | 13.67 | 8.63E-04 | 2.53E-01 | 4.66E-02 | 3.10E-04 | 8.86E-01 | 1.12E-01 | 4.00E-01 |
| 686.79862 | 45.29  | 12.52 | 12.87 | 12.78 | 13.22 | 1.61E-02 | 3.42E-01 | 5.95E-01 | 6.90E-03 | 9.75E-01 | 3.84E-01 | 1.84E-01 |
| 686.85413 | 44.15  | 13.10 | 13.35 | 13.51 | 13.64 | 3.00E-01 | 8.25E-01 | 4.75E-01 | 2.72E-01 | 9.45E-01 | 7.82E-01 | 9.77E-01 |
| 686.8751  | 36.52  | 12.62 | 13.92 | 13.69 | 14.21 | 8.89E-05 | 1.65E-03 | 1.31E-02 | 1.05E-04 | 9.20E-01 | 8.65E-01 | 4.99E-01 |
| 687.03426 | 17.06  | 11.24 | 16.14 | 16.36 | 15.04 | 7.54E-47 | 5.11E-15 | 5.11E-15 | 6.00E-15 | 8.83E-01 | 3.63E-03 | 2.23E-04 |
| 687.27699 | 137.42 | 18.08 | 17.44 | 17.55 | 17.33 | 3.26E-04 | 3.10E-03 | 1.89E-02 | 4.72E-04 | 9.39E-01 | 9.37E-01 | 6.57E-01 |
| 687.54229 | 271.21 | 21.05 | 21.34 | 21.46 | 21.40 | 8.63E-04 | 3.29E-02 | 7.69E-04 | 1.05E-02 | 7.00E-01 | 9.70E-01 | 9.30E-01 |
| 687.68106 | 60.3   | 12.38 | 9.60  | 12.03 | 11.78 | 2.94E-13 | 1.13E-12 | 7.63E-01 | 3.50E-01 | 8.05E-10 | 1.17E-07 | 8.98E-01 |
| 687.74509 | 55.21  | 12.69 | 11.39 | 13.04 | 12.57 | 5.52E-04 | 6.88E-03 | 7.96E-01 | 9.93E-01 | 3.51E-04 | 2.62E-02 | 6.66E-01 |
| 687.77315 | 46.08  | 12.17 | 13.54 | 13.07 | 13.38 | 1.38E-09 | 4.08E-09 | 1.66E-04 | 4.93E-07 | 1.34E-01 | 8.88E-01 | 5.05E-01 |
| 687.84088 | 59.44  | 11.83 | 11.49 | 12.78 | 12.59 | 1.00E-05 | 6.09E-01 | 3.39E-03 | 3.66E-02 | 4.57E-05 | 1.08E-03 | 9.19E-01 |
| 687.9232  | 50.46  | 12.88 | 12.03 | 11.84 | 12.36 | 2.46E-03 | 1.87E-02 | 1.95E-03 | 3.08E-01 | 9.17E-01 | 6.88E-01 | 3.05E-01 |
| 687.93037 | 43.57  | 13.00 | 12.03 | 12.34 | 12.61 | 3.21E-03 | 1.68E-03 | 5.76E-02 | 4.66E-01 | 6.63E-01 | 1.66E-01 | 7.66E-01 |
| 688.28023 | 142.21 | 16.69 | 13.15 | 13.90 | 14.63 | 1.55E-37 | 5.11E-15 | 5.77E-15 | 4.44E-14 | 8.32E-03 | 2.15E-08 | 1.26E-02 |
| 688.54504 | 266.06 | 19.60 | 19.93 | 20.09 | 20.27 | 2.02E-05 | 6.22E-02 | 1.54E-03 | 1.13E-05 | 6.66E-01 | 8.23E-02 | 5.66E-01 |
| 688.67792 | 57.73  | 16.97 | 16.77 | 18.28 | 17.88 | 4.40E-19 | 6.13E-01 | 3.36E-13 | 1.08E-06 | 4.26E-14 | 5.46E-09 | 9.13E-02 |
| 688.69872 | 60.98  | 15.03 | 13.45 | 16.25 | 15.87 | 2.44E-31 | 1.60E-12 | 3.11E-08 | 4.04E-04 | 5.11E-15 | 1.87E-14 | 2.84E-01 |
| 688.71709 | 58.15  | 13.61 | 11.10 | 12.91 | 13.22 | 7.70E-17 | 4.24E-14 | 5.03E-02 | 4.99E-01 | 2.53E-09 | 1.81E-11 | 7.07E-01 |

|           |        |       |       |       |       |          |          |          |          |          |          |          |
|-----------|--------|-------|-------|-------|-------|----------|----------|----------|----------|----------|----------|----------|
| 688.73755 | 55.08  | 13.23 | 12.49 | 12.80 | 13.00 | 7.00E-05 | 2.59E-05 | 3.48E-02 | 5.01E-01 | 2.02E-01 | 1.15E-02 | 6.22E-01 |
| 688.77394 | 40.95  | 11.90 | 13.25 | 13.23 | 13.23 | 1.10E-12 | 5.62E-10 | 8.63E-10 | 3.38E-09 | 9.99E-01 | 9.99E-01 | 1.00E+00 |
| 688.7895  | 35.97  | 13.13 | 13.25 | 13.32 | 13.58 | 1.85E-01 | 9.34E-01 | 7.82E-01 | 1.31E-01 | 9.87E-01 | 4.02E-01 | 5.95E-01 |
| 688.81263 | 45.34  | 16.84 | 18.64 | 18.51 | 18.64 | 9.93E-26 | 3.72E-14 | 4.33E-14 | 4.04E-14 | 8.62E-01 | 1.00E+00 | 8.68E-01 |
| 688.83459 | 39.25  | 14.17 | 16.61 | 16.43 | 16.51 | 2.75E-27 | 2.40E-14 | 4.01E-14 | 4.02E-14 | 8.59E-01 | 9.68E-01 | 9.90E-01 |
| 688.91984 | 64.73  | 12.83 | 12.93 | 10.78 | 11.46 | 2.58E-63 | 8.03E-01 | 5.11E-15 | 5.11E-15 | 5.11E-15 | 5.11E-15 | 5.66E-09 |
| 689.2844  | 150.36 | 13.55 | 11.97 | 12.02 | 12.04 | 3.17E-09 | 1.87E-07 | 3.54E-07 | 1.34E-06 | 9.98E-01 | 9.95E-01 | 1.00E+00 |
| 689.29452 | 158.76 | 12.46 | 10.44 | 10.66 | 10.57 | 1.73E-07 | 1.93E-06 | 2.26E-05 | 1.66E-05 | 9.43E-01 | 9.89E-01 | 9.96E-01 |
| 689.5536  | 289.86 | 17.48 | 18.77 | 19.39 | 19.07 | 8.03E-15 | 2.49E-07 | 6.95E-14 | 5.12E-10 | 4.46E-02 | 5.96E-01 | 5.59E-01 |
| 689.69427 | 59.66  | 13.56 | 11.63 | 12.97 | 12.97 | 1.18E-12 | 2.73E-13 | 6.83E-02 | 8.10E-02 | 5.03E-07 | 1.32E-06 | 1.00E+00 |
| 689.77956 | 46.53  | 13.17 | 13.32 | 12.70 | 13.54 | 9.09E-02 | 9.66E-01 | 4.71E-01 | 6.74E-01 | 2.47E-01 | 9.15E-01 | 6.67E-02 |
| 689.79341 | 44.93  | 11.66 | 13.32 | 12.82 | 13.20 | 3.59E-07 | 1.19E-06 | 1.14E-03 | 1.36E-05 | 3.86E-01 | 9.83E-01 | 6.40E-01 |
| 689.81582 | 37.89  | 11.79 | 12.56 | 12.38 | 12.53 | 6.70E-02 | 8.62E-02 | 2.57E-01 | 1.18E-01 | 9.50E-01 | 1.00E+00 | 9.71E-01 |
| 689.83763 | 40.15  | 10.95 | 12.84 | 12.91 | 12.89 | 5.21E-07 | 2.65E-05 | 9.57E-06 | 2.77E-05 | 9.98E-01 | 1.00E+00 | 1.00E+00 |
| 690.56044 | 296.85 | 16.41 | 17.62 | 18.27 | 17.82 | 8.91E-21 | 4.04E-10 | 3.66E-14 | 1.74E-12 | 2.25E-03 | 7.15E-01 | 7.28E-02 |
| 690.67238 | 51.68  | 12.44 | 10.98 | 12.16 | 12.62 | 1.78E-07 | 3.58E-06 | 7.57E-01 | 9.19E-01 | 3.65E-04 | 6.40E-07 | 4.02E-01 |
| 690.69197 | 59.14  | 13.56 | 11.59 | 13.41 | 13.31 | 6.40E-19 | 4.30E-14 | 8.92E-01 | 6.68E-01 | 6.48E-14 | 1.76E-12 | 9.72E-01 |
| 690.7713  | 41.23  | 19.37 | 21.46 | 21.40 | 21.26 | 2.20E-50 | 5.11E-15 | 5.11E-15 | 5.11E-15 | 9.67E-01 | 3.92E-01 | 6.65E-01 |
| 690.81101 | 44.91  | 14.84 | 14.89 | 14.58 | 15.65 | 7.85E-02 | 9.99E-01 | 9.12E-01 | 2.05E-01 | 8.71E-01 | 2.80E-01 | 5.50E-02 |
| 691.25005 | 156.93 | 12.63 | 10.52 | 10.67 | 11.48 | 3.09E-19 | 4.37E-14 | 4.57E-14 | 6.89E-06 | 9.10E-01 | 4.12E-04 | 3.92E-03 |
| 691.45646 | 246.18 | 19.35 | 19.53 | 19.23 | 17.94 | 1.96E-10 | 8.65E-01 | 9.39E-01 | 2.40E-08 | 5.51E-01 | 1.03E-09 | 7.33E-07 |
| 691.56011 | 298.95 | 11.19 | 11.68 | 11.84 | 12.07 | 2.86E-03 | 1.57E-01 | 2.80E-02 | 1.84E-03 | 9.10E-01 | 4.02E-01 | 7.90E-01 |
| 691.57002 | 296.84 | 11.30 | 11.78 | 11.77 | 12.02 | 3.07E-02 | 2.01E-01 | 1.98E-01 | 1.97E-02 | 1.00E+00 | 7.64E-01 | 7.53E-01 |
| 691.74074 | 50.73  | 13.43 | 14.97 | 14.77 | 14.78 | 2.94E-16 | 7.75E-14 | 1.71E-11 | 6.59E-11 | 7.22E-01 | 7.60E-01 | 1.00E+00 |
| 691.77568 | 47.44  | 15.36 | 17.44 | 17.39 | 17.33 | 1.53E-40 | 5.11E-15 | 5.11E-15 | 5.11E-15 | 9.89E-01 | 8.84E-01 | 9.73E-01 |
| 692.46013 | 238.65 | 17.55 | 17.78 | 17.21 | 15.64 | 1.43E-12 | 8.27E-01 | 5.77E-01 | 3.17E-10 | 1.62E-01 | 7.82E-12 | 4.59E-07 |
| 692.70841 | 50.01  | 18.58 | 18.48 | 19.29 | 19.04 | 9.80E-17 | 7.55E-01 | 4.08E-12 | 1.76E-05 | 8.10E-14 | 3.70E-07 | 5.86E-02 |
| 692.74046 | 50.75  | 13.46 | 14.42 | 14.23 | 14.35 | 5.63E-08 | 3.84E-07 | 6.07E-05 | 4.69E-06 | 6.88E-01 | 9.84E-01 | 8.92E-01 |
| 692.76893 | 41.45  | 18.11 | 19.79 | 19.79 | 19.69 | 9.11E-48 | 5.11E-15 | 5.11E-15 | 5.11E-15 | 1.00E+00 | 7.69E-01 | 7.99E-01 |
| 692.82112 | 39.16  | 12.74 | 13.15 | 12.86 | 13.20 | 1.94E-02 | 6.51E-02 | 8.74E-01 | 3.80E-02 | 3.25E-01 | 9.94E-01 | 2.20E-01 |
| 693.47235 | 272.79 | 23.91 | 23.91 | 23.51 | 23.50 | 2.01E-02 | 1.00E+00 | 9.91E-02 | 1.06E-01 | 1.11E-01 | 1.17E-01 | 1.00E+00 |
| 693.71287 | 57.66  | 13.86 | 12.53 | 13.47 | 13.50 | 1.58E-16 | 4.39E-14 | 3.03E-02 | 7.13E-02 | 2.86E-09 | 2.67E-09 | 9.96E-01 |
| 693.73749 | 51.7   | 11.86 | 12.61 | 12.44 | 12.94 | 5.80E-04 | 1.85E-02 | 1.04E-01 | 2.67E-04 | 9.09E-01 | 5.96E-01 | 2.26E-01 |
| 693.76849 | 49.58  | 13.16 | 12.96 | 12.72 | 13.01 | 3.11E-01 | 8.26E-01 | 2.32E-01 | 9.25E-01 | 7.50E-01 | 9.97E-01 | 6.36E-01 |
| 693.77773 | 46.66  | 12.43 | 13.94 | 13.77 | 13.99 | 9.59E-11 | 1.36E-08 | 3.76E-07 | 1.02E-08 | 9.07E-01 | 9.97E-01 | 8.24E-01 |
| 693.78766 | 40.03  | 12.42 | 14.54 | 13.31 | 13.99 | 1.46E-10 | 9.55E-11 | 1.44E-02 | 3.68E-06 | 4.52E-04 | 3.03E-01 | 1.36E-01 |
| 694.06625 | 16.92  | 10.35 | 13.85 | 13.18 | 12.57 | 6.81E-23 | 2.66E-14 | 4.33E-14 | 5.46E-10 | 1.62E-01 | 8.88E-04 | 2.53E-01 |
| 694.10376 | 18.21  | 11.65 | 16.49 | 15.00 | 13.92 | 2.52E-14 | 4.95E-14 | 4.22E-08 | 6.38E-04 | 4.76E-02 | 1.21E-04 | 2.56E-01 |
| 694.33472 | 203.78 | 16.06 | 14.70 | 15.40 | 15.67 | 3.30E-07 | 7.50E-08 | 2.10E-02 | 3.49E-01 | 1.69E-02 | 5.07E-04 | 6.75E-01 |
| 694.4304  | 203.24 | 14.29 | 17.09 | 17.11 | 16.28 | 3.57E-29 | 9.77E-15 | 7.55E-15 | 1.58E-13 | 1.00E+00 | 8.19E-03 | 5.82E-03 |
| 694.47576 | 267.52 | 22.46 | 22.42 | 22.09 | 22.01 | 4.30E-02 | 9.96E-01 | 1.98E-01 | 8.70E-02 | 3.21E-01 | 1.58E-01 | 9.71E-01 |
| 694.64561 | 72.19  | 11.76 | 10.94 | 14.60 | 13.43 | 1.39E-12 | 3.11E-01 | 5.12E-08 | 4.27E-03 | 8.94E-12 | 8.54E-06 | 9.52E-02 |
| 694.7063  | 59.88  | 16.66 | 15.75 | 17.00 | 16.79 | 1.09E-18 | 3.38E-11 | 4.06E-02 | 7.55E-01 | 4.26E-14 | 9.92E-13 | 4.07E-01 |
| 694.72415 | 54.48  | 18.99 | 19.68 | 20.13 | 19.89 | 1.97E-37 | 4.41E-14 | 5.11E-15 | 7.77E-15 | 3.71E-08 | 3.17E-02 | 1.10E-02 |
| 694.76004 | 43.29  | 14.14 | 12.73 | 12.99 | 13.33 | 1.51E-18 | 4.22E-14 | 6.24E-13 | 8.40E-07 | 2.82E-01 | 7.28E-04 | 1.29E-01 |

|           |        |       |       |       |       |          |          |          |          |          |          |          |
|-----------|--------|-------|-------|-------|-------|----------|----------|----------|----------|----------|----------|----------|
| 694.78387 | 40.16  | 14.47 | 17.48 | 17.41 | 17.60 | 1.08E-38 | 5.11E-15 | 5.11E-15 | 5.11E-15 | 9.92E-01 | 9.47E-01 | 8.43E-01 |
| 694.99726 | 17.63  | 10.40 | 13.29 | 13.02 | 12.69 | 2.05E-13 | 6.44E-12 | 2.81E-10 | 1.18E-07 | 9.02E-01 | 4.40E-01 | 8.34E-01 |
| 695.00534 | 21.09  | 12.80 | 16.88 | 16.86 | 15.73 | 2.17E-24 | 3.80E-14 | 3.89E-14 | 1.82E-11 | 1.00E+00 | 2.68E-02 | 2.89E-02 |
| 695.04636 | 19.96  | 11.14 | 13.90 | 13.87 | 13.27 | 9.51E-29 | 1.04E-14 | 1.07E-14 | 4.60E-14 | 9.99E-01 | 5.23E-02 | 7.21E-02 |
| 695.08797 | 17.87  | 10.33 | 14.60 | 14.76 | 13.97 | 2.21E-11 | 4.28E-09 | 7.86E-10 | 1.33E-06 | 9.96E-01 | 8.00E-01 | 6.62E-01 |
| 695.31257 | 244.74 | 16.14 | 17.28 | 17.84 | 16.09 | 1.60E-14 | 8.59E-06 | 1.49E-11 | 9.97E-01 | 8.98E-02 | 1.11E-05 | 4.66E-11 |
| 695.47179 | 280.54 | 20.00 | 20.61 | 20.28 | 20.23 | 2.70E-01 | 1.91E-01 | 7.95E-01 | 8.80E-01 | 7.09E-01 | 6.44E-01 | 9.99E-01 |
| 695.72799 | 57.07  | 13.55 | 12.80 | 13.06 | 13.11 | 1.45E-05 | 4.16E-06 | 4.48E-03 | 1.94E-02 | 3.21E-01 | 1.94E-01 | 9.86E-01 |
| 695.75484 | 43.07  | 12.41 | 12.85 | 12.43 | 13.00 | 2.06E-02 | 1.92E-01 | 1.00E+00 | 4.92E-02 | 2.46E-01 | 9.22E-01 | 6.98E-02 |
| 695.76128 | 47.16  | 13.70 | 14.80 | 14.14 | 14.51 | 3.02E-08 | 2.12E-08 | 7.07E-02 | 8.10E-05 | 1.84E-03 | 4.35E-01 | 1.76E-01 |
| 696.29266 | 203.86 | 15.45 | 16.41 | 17.02 | 16.48 | 2.08E-13 | 4.02E-06 | 7.62E-14 | 1.55E-06 | 1.01E-02 | 9.89E-01 | 3.30E-02 |
| 696.31619 | 245.12 | 14.27 | 15.30 | 15.89 | 13.48 | 7.05E-13 | 4.36E-03 | 8.58E-07 | 5.12E-02 | 2.13E-01 | 1.90E-07 | 3.16E-12 |
| 696.37138 | 176.13 | 11.05 | 15.44 | 15.50 | 10.76 | 6.41E-29 | 4.44E-14 | 4.29E-14 | 9.22E-01 | 9.99E-01 | 4.11E-14 | 4.20E-14 |
| 696.47028 | 282.1  | 17.11 | 18.50 | 18.27 | 17.93 | 1.68E-03 | 1.51E-03 | 1.05E-02 | 1.44E-01 | 9.35E-01 | 4.82E-01 | 8.22E-01 |
| 696.65499 | 70.93  | 10.28 | 7.41  | 11.53 | 11.04 | 5.74E-12 | 1.85E-06 | 9.93E-02 | 5.31E-01 | 1.57E-11 | 8.66E-09 | 8.25E-01 |
| 696.66286 | 68.69  | 14.17 | 11.59 | 15.52 | 14.57 | 2.05E-36 | 4.13E-14 | 5.17E-07 | 3.90E-01 | 5.11E-15 | 1.62E-14 | 1.59E-03 |
| 696.72068 | 52.92  | 18.12 | 18.49 | 18.89 | 18.73 | 9.43E-17 | 9.80E-05 | 4.31E-14 | 1.07E-10 | 3.70E-05 | 3.47E-02 | 2.92E-01 |
| 696.76107 | 47.04  | 12.10 | 13.97 | 13.41 | 13.82 | 8.15E-14 | 1.45E-12 | 5.27E-07 | 1.98E-10 | 1.06E-01 | 9.30E-01 | 3.74E-01 |
| 696.77898 | 47.78  | 14.23 | 13.17 | 13.58 | 14.40 | 4.90E-09 | 1.20E-06 | 5.76E-03 | 8.37E-01 | 1.78E-01 | 8.05E-08 | 5.73E-04 |
| 696.79991 | 43.38  | 16.81 | 18.12 | 17.65 | 18.07 | 2.57E-14 | 1.06E-12 | 4.82E-06 | 2.09E-11 | 3.06E-02 | 9.92E-01 | 7.68E-02 |
| 696.82468 | 43.51  | 12.56 | 12.91 | 12.98 | 13.06 | 2.74E-01 | 5.76E-01 | 4.08E-01 | 2.69E-01 | 9.94E-01 | 9.46E-01 | 9.90E-01 |
| 696.944   | 59.71  | 10.19 | 15.80 | 9.22  | 9.72  | 1.13E-64 | 5.11E-15 | 3.95E-03 | 3.76E-01 | 5.11E-15 | 5.11E-15 | 3.40E-01 |
| 697.08974 | 65.99  | 12.49 | 12.65 | 10.29 | 11.18 | 9.96E-27 | 8.74E-01 | 3.33E-14 | 2.13E-08 | 2.31E-14 | 1.02E-09 | 2.98E-04 |
| 697.29576 | 204.54 | 12.13 | 12.61 | 13.04 | 12.43 | 5.56E-02 | 4.79E-01 | 3.18E-02 | 8.21E-01 | 5.82E-01 | 9.55E-01 | 2.96E-01 |
| 697.35664 | 179.54 | 12.92 | 15.17 | 15.98 | 11.22 | 6.26E-17 | 1.13E-04 | 5.31E-08 | 8.04E-03 | 4.24E-01 | 3.69E-11 | 4.52E-14 |
| 697.48022 | 294.28 | 16.83 | 17.56 | 17.63 | 17.40 | 1.95E-01 | 2.82E-01 | 2.02E-01 | 5.39E-01 | 9.98E-01 | 9.80E-01 | 9.46E-01 |
| 697.6801  | 60.09  | 12.70 | 10.63 | 11.84 | 12.07 | 4.12E-13 | 9.13E-14 | 3.13E-03 | 6.70E-02 | 1.86E-05 | 5.98E-07 | 8.11E-01 |
| 697.76133 | 45.57  | 13.14 | 13.18 | 13.49 | 13.45 | 3.41E-01 | 9.98E-01 | 4.38E-01 | 5.73E-01 | 5.71E-01 | 6.98E-01 | 9.99E-01 |
| 697.77443 | 44.34  | 11.40 | 12.59 | 11.66 | 12.86 | 1.03E-04 | 5.19E-03 | 8.76E-01 | 4.63E-04 | 5.46E-02 | 8.84E-01 | 7.71E-03 |
| 697.79638 | 42.33  | 12.97 | 12.82 | 11.72 | 12.10 | 2.48E-04 | 9.63E-01 | 5.53E-04 | 3.80E-02 | 4.62E-03 | 1.37E-01 | 6.77E-01 |
| 697.95018 | 58.64  | 12.44 | 12.46 | 10.54 | 11.13 | 2.18E-38 | 1.00E+00 | 5.11E-15 | 4.31E-14 | 5.11E-15 | 4.25E-14 | 3.06E-04 |
| 697.96581 | 282.6  | 15.51 | 15.19 | 11.96 | 14.76 | 3.48E-16 | 8.66E-01 | 4.86E-14 | 2.90E-01 | 3.09E-12 | 7.55E-01 | 3.26E-09 |
| 698.51379 | 292.39 | 17.50 | 16.02 | 15.81 | 16.03 | 1.64E-10 | 2.10E-07 | 2.05E-09 | 5.55E-07 | 8.61E-01 | 1.00E+00 | 8.49E-01 |
| 698.65554 | 67.91  | 12.58 | 10.65 | 12.18 | 12.35 | 1.07E-11 | 3.02E-11 | 4.18E-01 | 8.30E-01 | 2.68E-07 | 2.86E-08 | 9.26E-01 |
| 698.68345 | 60.29  | 13.41 | 10.78 | 13.08 | 12.90 | 9.32E-23 | 3.26E-14 | 5.26E-01 | 1.77E-01 | 4.29E-14 | 1.19E-13 | 8.92E-01 |
| 698.71505 | 51.07  | 14.02 | 12.71 | 13.04 | 13.50 | 6.43E-13 | 9.45E-13 | 4.94E-08 | 1.23E-02 | 2.30E-01 | 7.35E-05 | 4.22E-02 |
| 698.72711 | 54.32  | 15.58 | 14.34 | 14.57 | 15.29 | 4.14E-12 | 1.27E-10 | 1.47E-07 | 3.88E-01 | 5.62E-01 | 3.43E-06 | 6.72E-04 |
| 698.75797 | 46.49  | 17.07 | 17.70 | 18.51 | 18.35 | 1.45E-25 | 8.77E-06 | 1.60E-14 | 4.34E-14 | 1.24E-08 | 1.13E-05 | 6.50E-01 |
| 698.7773  | 49.16  | 12.93 | 13.29 | 12.70 | 13.26 | 8.96E-02 | 5.12E-01 | 7.96E-01 | 6.14E-01 | 1.15E-01 | 9.99E-01 | 1.67E-01 |
| 698.79696 | 47.27  | 13.65 | 13.17 | 12.84 | 13.57 | 8.67E-02 | 5.06E-01 | 9.21E-02 | 9.96E-01 | 8.00E-01 | 6.88E-01 | 1.92E-01 |
| 698.81604 | 41.57  | 15.80 | 18.54 | 18.01 | 18.05 | 1.92E-25 | 1.51E-14 | 4.16E-14 | 4.15E-14 | 1.28E-01 | 2.15E-01 | 9.98E-01 |
| 698.88144 | 63.85  | 9.93  | 14.49 | 9.23  | 9.85  | 1.88E-52 | 5.11E-15 | 4.46E-02 | 9.92E-01 | 5.11E-15 | 5.11E-15 | 1.21E-01 |
| 698.93832 | 53.72  | 12.58 | 12.09 | 10.54 | 11.26 | 2.58E-39 | 1.04E-03 | 5.11E-15 | 4.37E-14 | 1.02E-14 | 2.48E-08 | 1.53E-06 |
| 699.49667 | 284.4  | 15.41 | 17.23 | 17.00 | 16.93 | 4.31E-07 | 1.80E-06 | 3.04E-05 | 1.51E-04 | 9.18E-01 | 8.41E-01 | 9.97E-01 |
| 699.51973 | 285.93 | 18.12 | 15.24 | 15.66 | 15.93 | 2.71E-25 | 1.69E-14 | 4.27E-14 | 6.91E-14 | 3.53E-01 | 4.86E-02 | 7.43E-01 |

|           |        |       |       |       |       |          |          |          |          |          |          |          |
|-----------|--------|-------|-------|-------|-------|----------|----------|----------|----------|----------|----------|----------|
| 699.72748 | 52.78  | 13.63 | 14.38 | 14.48 | 14.34 | 2.90E-08 | 5.98E-06 | 1.35E-07 | 3.09E-05 | 8.96E-01 | 9.96E-01 | 7.97E-01 |
| 699.75731 | 50.37  | 12.44 | 12.00 | 12.43 | 12.43 | 5.17E-01 | 5.67E-01 | 1.00E+00 | 1.00E+00 | 5.97E-01 | 6.27E-01 | 1.00E+00 |
| 700.30645 | 211.41 | 14.14 | 13.16 | 12.78 | 13.99 | 1.06E-07 | 8.04E-04 | 7.64E-07 | 9.30E-01 | 4.38E-01 | 1.23E-02 | 4.68E-05 |
| 700.52823 | 290.38 | 17.49 | 16.21 | 16.00 | 16.54 | 4.17E-04 | 3.90E-03 | 3.98E-04 | 6.42E-02 | 9.40E-01 | 8.38E-01 | 5.01E-01 |
| 700.67103 | 65.39  | 13.39 | 10.25 | 12.04 | 12.66 | 1.67E-26 | 5.33E-15 | 7.70E-07 | 2.49E-02 | 1.30E-10 | 4.13E-14 | 8.43E-02 |
| 700.69431 | 59.84  | 15.39 | 13.34 | 15.93 | 15.66 | 1.28E-32 | 2.86E-14 | 2.38E-02 | 5.29E-01 | 5.11E-15 | 1.07E-14 | 5.14E-01 |
| 700.71675 | 55.39  | 17.58 | 17.94 | 18.99 | 18.74 | 7.70E-26 | 2.55E-02 | 1.91E-14 | 4.37E-14 | 1.63E-13 | 4.51E-08 | 2.15E-01 |
| 700.73206 | 55.08  | 13.32 | 13.28 | 12.65 | 13.13 | 4.54E-02 | 9.99E-01 | 4.79E-02 | 8.97E-01 | 8.08E-02 | 9.46E-01 | 2.85E-01 |
| 700.755   | 50.67  | 16.68 | 17.45 | 17.57 | 17.52 | 1.25E-26 | 4.27E-14 | 2.02E-14 | 3.93E-14 | 4.66E-01 | 8.19E-01 | 9.49E-01 |
| 700.79211 | 47.67  | 11.58 | 11.75 | 11.60 | 13.03 | 5.05E-05 | 9.57E-01 | 1.00E+00 | 1.36E-04 | 9.72E-01 | 1.41E-03 | 2.42E-04 |
| 700.81659 | 35.75  | 12.84 | 12.55 | 12.98 | 13.24 | 3.57E-02 | 5.82E-01 | 9.14E-01 | 2.96E-01 | 2.39E-01 | 2.02E-02 | 6.86E-01 |
| 700.87538 | 55.51  | 11.25 | 13.05 | 9.73  | 10.59 | 1.26E-24 | 1.16E-09 | 3.05E-07 | 8.74E-02 | 7.33E-15 | 4.94E-14 | 1.46E-02 |
| 700.88744 | 50.94  | 9.09  | 13.17 | 8.01  | 8.98  | 3.76E-22 | 5.02E-14 | 9.71E-02 | 9.96E-01 | 3.46E-14 | 7.26E-14 | 1.99E-01 |
| 701.29327 | 147.85 | 14.19 | 10.40 | 9.67  | 10.91 | 1.31E-28 | 4.09E-14 | 5.33E-15 | 4.46E-14 | 2.01E-01 | 5.51E-01 | 7.08E-03 |
| 701.51348 | 265.21 | 13.17 | 20.53 | 19.71 | 20.51 | 1.24E-39 | 5.11E-15 | 5.11E-15 | 5.11E-15 | 4.06E-01 | 1.00E+00 | 4.41E-01 |
| 701.53297 | 286.27 | 16.86 | 14.35 | 14.09 | 14.47 | 2.63E-13 | 9.53E-10 | 1.12E-11 | 1.45E-08 | 9.07E-01 | 9.90E-01 | 7.67E-01 |
| 701.702   | 59.25  | 13.88 | 11.36 | 13.99 | 13.64 | 1.71E-21 | 4.39E-14 | 9.75E-01 | 8.00E-01 | 4.37E-14 | 1.37E-13 | 5.72E-01 |
| 701.72394 | 55.3   | 13.27 | 12.50 | 13.04 | 13.19 | 1.26E-04 | 1.12E-04 | 5.60E-01 | 9.70E-01 | 1.52E-02 | 1.51E-03 | 8.55E-01 |
| 701.73449 | 50.7   | 11.49 | 11.90 | 12.47 | 12.52 | 8.29E-03 | 6.20E-01 | 1.97E-02 | 1.85E-02 | 3.52E-01 | 3.17E-01 | 9.99E-01 |
| 701.77262 | 46.17  | 11.90 | 15.79 | 15.13 | 15.23 | 6.86E-30 | 5.33E-15 | 3.70E-14 | 3.93E-14 | 1.65E-01 | 3.22E-01 | 9.90E-01 |
| 701.79381 | 33.68  | 13.54 | 13.23 | 13.03 | 13.00 | 3.84E-02 | 4.44E-01 | 6.06E-02 | 5.53E-02 | 7.62E-01 | 7.11E-01 | 9.99E-01 |
| 702.05154 | 16.84  | 10.31 | 15.17 | 14.81 | 13.80 | 4.20E-35 | 5.11E-15 | 5.11E-15 | 4.26E-14 | 7.48E-01 | 1.38E-03 | 2.96E-02 |
| 702.07993 | 20.9   | 13.78 | 17.01 | 17.10 | 15.98 | 2.25E-18 | 4.64E-14 | 4.26E-14 | 1.41E-07 | 9.96E-01 | 4.38E-02 | 2.24E-02 |
| 702.51681 | 274.34 | 14.43 | 19.10 | 18.35 | 18.76 | 6.53E-34 | 5.11E-15 | 1.87E-14 | 7.33E-15 | 1.53E-01 | 7.89E-01 | 6.76E-01 |
| 702.67355 | 54.85  | 15.00 | 12.04 | 15.65 | 14.92 | 1.98E-38 | 5.11E-15 | 2.32E-02 | 9.82E-01 | 5.11E-15 | 7.99E-15 | 1.21E-02 |
| 702.69533 | 61.68  | 14.79 | 12.41 | 14.72 | 14.29 | 1.33E-25 | 1.98E-14 | 9.87E-01 | 9.91E-02 | 3.44E-14 | 6.63E-14 | 2.12E-01 |
| 702.71478 | 55.67  | 16.19 | 16.54 | 17.67 | 17.34 | 3.07E-21 | 8.88E-02 | 4.12E-14 | 5.97E-12 | 1.02E-11 | 3.71E-06 | 1.49E-01 |
| 702.77041 | 46.66  | 11.33 | 13.88 | 13.42 | 13.66 | 1.00E-22 | 4.09E-14 | 5.71E-14 | 4.31E-14 | 2.61E-01 | 8.38E-01 | 7.80E-01 |
| 702.8288  | 42     | 13.88 | 14.34 | 14.11 | 15.04 | 1.10E-02 | 5.37E-01 | 9.02E-01 | 6.32E-03 | 9.16E-01 | 2.19E-01 | 5.14E-02 |
| 702.84943 | 44.2   | 14.61 | 17.32 | 17.32 | 17.36 | 3.84E-26 | 4.11E-14 | 3.94E-14 | 4.26E-14 | 1.00E+00 | 9.99E-01 | 9.99E-01 |
| 703.25098 | 135.97 | 15.92 | 16.50 | 17.28 | 16.51 | 5.90E-10 | 1.27E-02 | 4.50E-11 | 1.36E-02 | 4.67E-04 | 1.00E+00 | 8.43E-04 |
| 703.52456 | 283.18 | 14.49 | 16.05 | 15.43 | 15.95 | 5.70E-08 | 2.36E-07 | 3.66E-03 | 2.56E-06 | 1.20E-01 | 9.88E-01 | 2.57E-01 |
| 703.5527  | 289.59 | 16.57 | 14.34 | 14.78 | 14.01 | 3.12E-10 | 9.49E-08 | 2.19E-05 | 2.26E-09 | 6.63E-01 | 8.46E-01 | 2.15E-01 |
| 703.74655 | 48.47  | 12.95 | 13.37 | 13.01 | 13.34 | 4.51E-02 | 1.01E-01 | 9.86E-01 | 1.49E-01 | 2.22E-01 | 9.99E-01 | 2.98E-01 |
| 703.77404 | 46.34  | 12.73 | 13.85 | 13.33 | 13.94 | 8.95E-08 | 2.48E-06 | 2.87E-02 | 7.00E-07 | 8.00E-02 | 9.81E-01 | 3.47E-02 |
| 703.90432 | 55.63  | 13.85 | 12.07 | 12.85 | 13.66 | 9.43E-17 | 4.29E-14 | 5.93E-06 | 7.99E-01 | 1.02E-03 | 7.86E-12 | 8.10E-04 |
| 704.2545  | 133.6  | 13.07 | 12.44 | 14.29 | 13.21 | 3.85E-05 | 3.19E-01 | 5.64E-03 | 9.84E-01 | 1.06E-05 | 2.02E-01 | 2.82E-02 |
| 704.34051 | 191.84 | 13.85 | 13.09 | 12.06 | 13.52 | 7.83E-09 | 3.69E-02 | 3.99E-09 | 6.47E-01 | 2.05E-03 | 4.85E-01 | 7.96E-06 |
| 704.67253 | 63.15  | 14.00 | 11.29 | 14.53 | 13.54 | 6.50E-17 | 1.30E-12 | 4.27E-01 | 5.55E-01 | 4.31E-14 | 2.27E-08 | 3.43E-02 |
| 704.7119  | 48.79  | 13.38 | 12.01 | 12.43 | 12.80 | 6.32E-07 | 2.50E-07 | 5.36E-04 | 9.16E-02 | 3.24E-01 | 1.14E-02 | 4.56E-01 |
| 704.74712 | 47.57  | 14.05 | 15.85 | 15.02 | 15.47 | 1.05E-18 | 4.31E-14 | 1.06E-06 | 4.20E-12 | 8.73E-05 | 2.20E-01 | 8.43E-02 |
| 704.76472 | 45.37  | 13.08 | 12.90 | 13.94 | 13.89 | 1.91E-04 | 9.16E-01 | 1.16E-02 | 2.63E-02 | 1.88E-03 | 5.01E-03 | 9.98E-01 |
| 704.7866  | 41.69  | 17.18 | 18.66 | 18.56 | 18.66 | 4.64E-27 | 3.09E-14 | 4.13E-14 | 3.71E-14 | 9.01E-01 | 1.00E+00 | 8.99E-01 |
| 704.80905 | 46.71  | 16.06 | 19.36 | 19.41 | 19.29 | 1.23E-32 | 6.88E-15 | 5.77E-15 | 1.40E-14 | 9.99E-01 | 9.94E-01 | 9.76E-01 |
| 704.89068 | 64.87  | 13.24 | 13.79 | 11.25 | 11.93 | 2.27E-78 | 3.85E-08 | 5.11E-15 | 5.11E-15 | 5.11E-15 | 5.11E-15 | 4.30E-11 |



|           |        |       |       |       |       |          |          |          |          |          |          |          |
|-----------|--------|-------|-------|-------|-------|----------|----------|----------|----------|----------|----------|----------|
| 705.47143 | 261.83 | 18.12 | 17.49 | 17.58 | 16.72 | 1.64E-04 | 1.43E-01 | 2.39E-01 | 3.52E-05 | 9.93E-01 | 6.51E-02 | 3.06E-02 |
| 705.51109 | 230.47 | 19.92 | 19.37 | 19.98 | 19.80 | 6.01E-02 | 9.80E-02 | 9.95E-01 | 9.58E-01 | 6.14E-02 | 3.26E-01 | 8.84E-01 |
| 705.79169 | 45.76  | 13.62 | 13.58 | 13.20 | 13.74 | 2.82E-02 | 9.97E-01 | 9.64E-02 | 9.02E-01 | 1.69E-01 | 8.29E-01 | 2.31E-02 |
| 705.80923 | 40.81  | 13.11 | 13.00 | 13.19 | 13.65 | 8.48E-03 | 9.25E-01 | 9.73E-01 | 2.97E-02 | 7.33E-01 | 6.26E-03 | 9.65E-02 |
| 706.47549 | 253.58 | 15.99 | 15.55 | 14.76 | 14.33 | 3.48E-04 | 7.07E-01 | 1.31E-02 | 4.83E-04 | 2.21E-01 | 2.24E-02 | 7.31E-01 |
| 706.51447 | 230.57 | 18.79 | 18.19 | 18.83 | 18.70 | 4.42E-02 | 6.98E-02 | 9.99E-01 | 9.82E-01 | 5.36E-02 | 2.06E-01 | 9.54E-01 |
| 706.72395 | 61.93  | 14.82 | 11.29 | 14.00 | 14.44 | 3.33E-34 | 5.11E-15 | 5.19E-03 | 4.37E-01 | 3.35E-14 | 7.33E-15 | 3.26E-01 |
| 706.74526 | 43.92  | 19.52 | 21.14 | 21.29 | 21.10 | 1.57E-47 | 5.11E-15 | 5.11E-15 | 5.11E-15 | 5.29E-01 | 9.82E-01 | 3.26E-01 |
| 706.78505 | 47.76  | 15.66 | 16.44 | 16.44 | 16.66 | 1.12E-08 | 1.43E-05 | 1.25E-05 | 3.07E-08 | 1.00E+00 | 5.46E-01 | 5.29E-01 |
| 706.80564 | 46.48  | 13.17 | 14.42 | 14.57 | 14.69 | 3.31E-15 | 1.39E-09 | 8.81E-12 | 8.46E-13 | 8.65E-01 | 5.12E-01 | 9.20E-01 |
| 707.22183 | 155.76 | 10.31 | 10.28 | 10.95 | 10.63 | 1.67E-01 | 1.00E+00 | 2.12E-01 | 7.75E-01 | 2.07E-01 | 7.52E-01 | 8.01E-01 |
| 707.46451 | 285.1  | 13.30 | 15.23 | 10.83 | 11.79 | 4.81E-39 | 7.27E-11 | 4.26E-14 | 6.32E-07 | 5.11E-15 | 6.88E-15 | 4.31E-03 |
| 707.48759 | 290.14 | 20.27 | 19.23 | 19.36 | 19.78 | 3.55E-03 | 4.22E-03 | 1.57E-02 | 4.10E-01 | 9.73E-01 | 3.11E-01 | 5.48E-01 |
| 707.52323 | 233.57 | 18.42 | 18.01 | 18.39 | 18.16 | 5.53E-01 | 5.88E-01 | 1.00E+00 | 8.55E-01 | 6.55E-01 | 9.75E-01 | 8.94E-01 |
| 707.71436 | 54.89  | 14.55 | 15.25 | 15.90 | 15.46 | 3.49E-21 | 2.22E-07 | 2.62E-14 | 6.25E-11 | 3.53E-06 | 3.93E-01 | 4.04E-03 |
| 707.74972 | 50.08  | 14.33 | 15.02 | 15.13 | 15.10 | 1.14E-21 | 9.55E-14 | 4.37E-14 | 4.22E-14 | 5.02E-01 | 7.42E-01 | 9.86E-01 |
| 708.49097 | 288.12 | 18.37 | 16.93 | 16.66 | 17.35 | 1.54E-04 | 2.24E-03 | 1.35E-04 | 6.41E-02 | 9.06E-01 | 7.58E-01 | 3.51E-01 |
| 708.52945 | 235.13 | 16.19 | 15.53 | 15.81 | 15.71 | 5.72E-01 | 5.16E-01 | 8.56E-01 | 7.64E-01 | 9.40E-01 | 9.84E-01 | 9.97E-01 |
| 708.68225 | 59.59  | 18.20 | 18.02 | 19.18 | 18.83 | 1.11E-31 | 1.86E-01 | 2.29E-14 | 3.57E-10 | 5.11E-15 | 5.15E-14 | 9.54E-04 |
| 708.7135  | 55.02  | 14.16 | 14.98 | 15.62 | 15.20 | 8.89E-25 | 6.80E-10 | 7.11E-15 | 9.46E-14 | 4.36E-06 | 3.30E-01 | 6.84E-03 |
| 708.72089 | 48     | 13.90 | 12.73 | 12.73 | 12.76 | 8.02E-16 | 3.09E-12 | 1.96E-12 | 2.52E-11 | 1.00E+00 | 9.99E-01 | 9.99E-01 |
| 708.7429  | 50.7   | 18.44 | 19.72 | 19.93 | 19.78 | 4.54E-44 | 5.11E-15 | 5.11E-15 | 5.11E-15 | 1.03E-01 | 9.32E-01 | 3.62E-01 |
| 708.79071 | 46.06  | 12.14 | 14.29 | 14.26 | 15.03 | 2.26E-10 | 2.42E-06 | 2.65E-06 | 4.14E-10 | 1.00E+00 | 3.15E-01 | 2.76E-01 |
| 708.802   | 44.37  | 12.96 | 12.92 | 12.79 | 13.04 | 7.68E-01 | 9.98E-01 | 8.84E-01 | 9.84E-01 | 9.47E-01 | 9.57E-01 | 7.21E-01 |
| 709.10612 | 17.49  | 12.44 | 14.48 | 13.82 | 13.36 | 4.03E-05 | 1.45E-05 | 6.03E-03 | 1.50E-01 | 4.19E-01 | 5.88E-02 | 7.20E-01 |
| 709.14821 | 63.07  | 11.23 | 16.18 | 9.57  | 10.03 | 2.78E-90 | 5.11E-15 | 7.44E-14 | 1.04E-07 | 5.11E-15 | 5.11E-15 | 1.16E-01 |
| 709.25949 | 157.06 | 13.81 | 10.35 | 10.40 | 11.35 | 1.80E-41 | 5.11E-15 | 5.11E-15 | 3.77E-14 | 9.97E-01 | 2.38E-04 | 4.64E-04 |
| 709.52866 | 240.64 | 19.12 | 18.17 | 18.54 | 18.64 | 3.99E-14 | 4.59E-14 | 1.20E-06 | 1.56E-04 | 4.94E-03 | 3.06E-04 | 8.18E-01 |
| 709.68417 | 60.99  | 13.09 | 10.62 | 13.26 | 13.12 | 3.17E-36 | 5.11E-15 | 7.96E-01 | 9.99E-01 | 5.11E-15 | 5.33E-15 | 8.77E-01 |
| 709.71214 | 48.09  | 12.49 | 12.14 | 12.53 | 12.89 | 6.97E-02 | 5.38E-01 | 9.99E-01 | 4.53E-01 | 4.69E-01 | 3.64E-02 | 5.54E-01 |
| 709.74494 | 53.6   | 13.07 | 12.38 | 13.13 | 13.05 | 5.30E-02 | 1.00E-01 | 9.96E-01 | 1.00E+00 | 6.70E-02 | 1.47E-01 | 9.93E-01 |
| 709.75283 | 41.32  | 12.97 | 12.73 | 12.51 | 12.97 | 8.34E-02 | 6.43E-01 | 9.82E-02 | 1.00E+00 | 6.94E-01 | 7.02E-01 | 1.39E-01 |
| 709.76037 | 46.88  | 13.07 | 14.72 | 14.20 | 14.53 | 1.71E-23 | 2.93E-14 | 6.77E-12 | 4.35E-14 | 4.90E-03 | 6.43E-01 | 1.56E-01 |
| 710.13103 | 17.66  | 10.34 | 14.08 | 13.80 | 14.26 | 8.23E-25 | 4.12E-14 | 4.19E-14 | 3.99E-14 | 8.83E-01 | 9.69E-01 | 6.45E-01 |
| 710.30873 | 203.34 | 12.31 | 11.64 | 12.63 | 11.49 | 2.11E-02 | 3.48E-01 | 8.50E-01 | 1.99E-01 | 7.80E-02 | 9.85E-01 | 3.64E-02 |
| 710.47398 | 290.44 | 18.21 | 17.73 | 16.21 | 16.58 | 4.16E-07 | 5.84E-01 | 1.84E-06 | 2.60E-04 | 7.79E-04 | 2.46E-02 | 7.97E-01 |
| 710.53047 | 234.94 | 17.61 | 16.41 | 17.09 | 17.01 | 1.30E-09 | 1.06E-10 | 1.16E-02 | 3.30E-03 | 6.30E-04 | 5.50E-03 | 9.63E-01 |
| 710.68766 | 59.65  | 18.80 | 18.98 | 19.90 | 19.61 | 1.24E-31 | 1.64E-01 | 5.11E-15 | 4.33E-14 | 3.92E-14 | 1.98E-10 | 9.01E-03 |
| 710.73923 | 46.55  | 14.21 | 13.03 | 13.40 | 13.74 | 2.80E-17 | 4.31E-14 | 1.31E-09 | 1.35E-03 | 2.08E-02 | 8.83E-07 | 4.36E-02 |
| 710.75871 | 47.72  | 14.07 | 15.38 | 15.27 | 15.43 | 2.23E-29 | 1.67E-14 | 3.64E-14 | 1.38E-14 | 7.74E-01 | 9.77E-01 | 5.34E-01 |
| 710.83667 | 41.14  | 14.67 | 17.27 | 16.77 | 17.07 | 4.08E-17 | 4.88E-14 | 1.06E-10 | 1.52E-12 | 3.64E-01 | 9.15E-01 | 7.87E-01 |
| 710.97464 | 286.62 | 17.34 | 17.13 | 15.97 | 15.97 | 4.68E-04 | 9.57E-01 | 4.21E-03 | 6.34E-03 | 2.71E-02 | 3.54E-02 | 1.00E+00 |
| 711.08208 | 67.08  | 12.88 | 12.52 | 10.63 | 11.29 | 4.68E-38 | 8.00E-02 | 5.11E-15 | 4.09E-14 | 7.33E-15 | 5.24E-12 | 3.02E-04 |
| 711.12    | 17.35  | 10.98 | 13.26 | 12.78 | 13.51 | 2.84E-13 | 2.60E-10 | 5.27E-07 | 8.79E-12 | 4.83E-01 | 8.86E-01 | 1.48E-01 |
| 711.27738 | 158.43 | 13.09 | 10.04 | 10.78 | 11.80 | 2.18E-20 | 3.99E-14 | 7.38E-13 | 1.84E-04 | 6.92E-02 | 2.49E-07 | 5.55E-03 |

|           |        |       |       |       |       |           |          |          |          |          |          |          |
|-----------|--------|-------|-------|-------|-------|-----------|----------|----------|----------|----------|----------|----------|
| 711.4788  | 290.02 | 17.23 | 16.89 | 15.56 | 16.30 | 1.81E-07  | 6.55E-01 | 1.36E-07 | 1.11E-02 | 6.53E-05 | 2.17E-01 | 7.33E-02 |
| 711.54676 | 251.32 | 17.10 | 14.41 | 16.06 | 15.99 | 1.23E-14  | 4.35E-14 | 3.09E-03 | 2.09E-03 | 9.38E-07 | 6.48E-06 | 9.96E-01 |
| 711.70063 | 59.82  | 14.09 | 11.50 | 14.11 | 13.89 | 4.50E-28  | 1.38E-14 | 1.00E+00 | 8.39E-01 | 1.62E-14 | 4.17E-14 | 8.05E-01 |
| 711.73627 | 44.05  | 13.10 | 12.80 | 12.89 | 13.01 | 3.01E-01  | 2.67E-01 | 5.78E-01 | 9.44E-01 | 9.48E-01 | 6.40E-01 | 9.12E-01 |
| 711.76176 | 46.99  | 13.01 | 13.02 | 12.73 | 13.27 | 3.36E-02  | 1.00E+00 | 3.39E-01 | 4.73E-01 | 3.57E-01 | 5.06E-01 | 1.56E-02 |
| 711.9809  | 285.56 | 14.66 | 15.59 | 14.93 | 14.75 | 1.00E-02  | 8.61E-03 | 7.89E-01 | 9.89E-01 | 1.19E-01 | 3.50E-02 | 9.41E-01 |
| 712.49316 | 286.97 | 17.31 | 19.15 | 18.94 | 18.25 | 5.91E-13  | 6.21E-12 | 6.77E-10 | 1.20E-03 | 8.35E-01 | 3.05E-03 | 3.54E-02 |
| 712.69523 | 48.55  | 17.80 | 17.65 | 18.81 | 18.53 | 6.06E-32  | 3.57E-01 | 2.31E-14 | 1.68E-12 | 5.77E-15 | 4.37E-14 | 1.89E-02 |
| 712.73368 | 49.76  | 13.64 | 13.48 | 13.19 | 13.43 | 9.53E-03  | 6.33E-01 | 3.87E-03 | 4.33E-01 | 1.34E-01 | 9.86E-01 | 2.88E-01 |
| 712.77087 | 44.61  | 16.84 | 18.63 | 18.09 | 18.36 | 4.77E-24  | 2.26E-14 | 9.07E-13 | 4.20E-14 | 5.74E-03 | 4.05E-01 | 3.42E-01 |
| 712.79638 | 47.77  | 12.25 | 12.66 | 13.04 | 13.04 | 5.39E-03  | 3.56E-01 | 9.56E-03 | 1.31E-02 | 4.63E-01 | 4.88E-01 | 1.00E+00 |
| 712.83252 | 41.62  | 13.83 | 15.25 | 14.33 | 14.90 | 1.93E-03  | 1.54E-03 | 5.57E-01 | 3.56E-02 | 8.94E-02 | 8.23E-01 | 4.86E-01 |
| 712.92369 | 59.09  | 12.86 | 17.31 | 10.77 | 11.77 | 1.92E-103 | 5.11E-15 | 5.11E-15 | 3.44E-09 | 5.11E-15 | 5.11E-15 | 8.65E-08 |
| 712.93828 | 53.56  | 13.51 | 13.15 | 11.51 | 12.25 | 1.68E-54  | 2.34E-03 | 5.11E-15 | 5.77E-15 | 5.11E-15 | 5.03E-14 | 1.09E-10 |
| 713.47736 | 284.04 | 15.12 | 15.94 | 15.08 | 15.81 | 4.54E-02  | 1.28E-01 | 1.00E+00 | 2.73E-01 | 1.14E-01 | 9.88E-01 | 2.45E-01 |
| 713.49912 | 290.82 | 15.27 | 16.73 | 16.24 | 15.60 | 6.89E-08  | 9.22E-08 | 6.26E-04 | 5.58E-01 | 2.18E-01 | 1.52E-04 | 7.12E-02 |
| 713.69737 | 59.76  | 13.92 | 10.39 | 12.26 | 12.54 | 8.32E-31  | 5.11E-15 | 4.65E-10 | 6.90E-07 | 1.39E-11 | 1.17E-13 | 6.90E-01 |
| 713.77413 | 45.31  | 13.21 | 13.05 | 12.95 | 13.05 | 5.46E-01  | 8.03E-01 | 4.72E-01 | 8.18E-01 | 9.55E-01 | 1.00E+00 | 9.56E-01 |
| 713.78435 | 40.36  | 12.75 | 12.90 | 12.85 | 13.22 | 2.09E-01  | 9.04E-01 | 9.67E-01 | 1.61E-01 | 9.96E-01 | 5.12E-01 | 3.77E-01 |
| 714.50896 | 252.6  | 19.76 | 17.67 | 17.69 | 18.08 | 2.17E-14  | 5.50E-12 | 5.26E-12 | 5.99E-08 | 1.00E+00 | 5.03E-01 | 5.34E-01 |
| 714.68602 | 48.41  | 13.82 | 12.22 | 12.52 | 13.08 | 1.50E-15  | 5.15E-14 | 8.97E-11 | 6.51E-04 | 4.03E-01 | 1.10E-04 | 2.20E-02 |
| 714.69587 | 57.71  | 14.56 | 13.39 | 15.03 | 14.96 | 1.13E-21  | 1.39E-11 | 1.35E-02 | 6.59E-02 | 4.23E-14 | 4.26E-14 | 9.68E-01 |
| 714.73184 | 55.27  | 16.14 | 16.17 | 17.29 | 17.10 | 3.76E-17  | 9.98E-01 | 9.47E-13 | 7.37E-09 | 1.05E-11 | 4.52E-08 | 6.06E-01 |
| 714.77111 | 47.8   | 13.12 | 13.81 | 12.96 | 14.20 | 4.80E-03  | 2.57E-01 | 9.73E-01 | 2.58E-02 | 1.19E-01 | 7.44E-01 | 8.78E-03 |
| 714.79018 | 43.29  | 16.36 | 19.36 | 18.99 | 18.96 | 4.63E-33  | 5.11E-15 | 1.04E-14 | 2.29E-14 | 4.00E-01 | 3.46E-01 | 9.99E-01 |
| 714.91212 | 56.35  | 13.15 | 14.06 | 11.09 | 11.85 | 3.60E-68  | 1.47E-12 | 5.11E-15 | 3.33E-14 | 5.11E-15 | 5.11E-15 | 1.64E-08 |
| 714.92232 | 53.19  | 12.96 | 12.79 | 10.90 | 11.56 | 8.03E-55  | 4.11E-01 | 5.11E-15 | 5.33E-15 | 5.11E-15 | 3.22E-14 | 1.26E-07 |
| 715.45587 | 233.61 | 17.78 | 18.64 | 18.52 | 16.94 | 1.15E-09  | 4.85E-03 | 2.03E-02 | 8.72E-03 | 9.65E-01 | 9.46E-09 | 8.40E-08 |
| 715.49368 | 293.42 | 11.83 | 12.50 | 14.76 | 14.16 | 7.92E-05  | 7.72E-01 | 1.77E-04 | 6.52E-03 | 8.66E-03 | 1.05E-01 | 8.48E-01 |
| 715.51203 | 288.03 | 17.67 | 16.77 | 17.10 | 16.70 | 6.36E-03  | 1.58E-02 | 2.19E-01 | 9.66E-03 | 7.10E-01 | 9.96E-01 | 5.81E-01 |
| 715.69999 | 56.14  | 13.51 | 12.77 | 13.97 | 13.73 | 1.81E-15  | 4.53E-07 | 2.90E-03 | 3.31E-01 | 4.30E-14 | 2.90E-10 | 3.38E-01 |
| 715.78991 | 41.08  | 12.25 | 12.78 | 12.62 | 12.91 | 1.18E-02  | 4.91E-02 | 2.59E-01 | 1.02E-02 | 8.72E-01 | 9.33E-01 | 5.36E-01 |
| 716.27834 | 212.7  | 12.53 | 12.95 | 12.45 | 12.84 | 1.43E-01  | 3.04E-01 | 9.89E-01 | 6.04E-01 | 1.85E-01 | 9.70E-01 | 4.31E-01 |
| 716.46061 | 237.98 | 16.45 | 16.40 | 16.27 | 14.91 | 1.03E-04  | 9.99E-01 | 9.62E-01 | 2.27E-04 | 9.86E-01 | 5.86E-04 | 1.80E-03 |
| 716.50752 | 200.84 | 14.03 | 13.16 | 13.54 | 13.25 | 7.64E-03  | 7.83E-03 | 2.60E-01 | 2.90E-02 | 5.13E-01 | 9.86E-01 | 7.50E-01 |
| 716.51357 | 205.9  | 14.06 | 14.25 | 14.29 | 13.93 | 2.52E-01  | 7.40E-01 | 6.29E-01 | 9.16E-01 | 9.98E-01 | 3.83E-01 | 2.90E-01 |
| 716.52472 | 289.03 | 18.21 | 16.02 | 15.93 | 16.35 | 3.55E-12  | 1.15E-09 | 1.49E-10 | 5.00E-07 | 9.92E-01 | 7.84E-01 | 6.13E-01 |
| 716.69496 | 57.52  | 15.84 | 15.62 | 17.07 | 16.77 | 2.17E-20  | 4.98E-01 | 2.50E-13 | 6.46E-08 | 4.40E-14 | 9.43E-11 | 2.51E-01 |
| 716.72125 | 49.75  | 13.70 | 12.42 | 12.30 | 13.00 | 6.87E-24  | 4.35E-14 | 3.18E-14 | 2.18E-06 | 8.12E-01 | 1.90E-04 | 3.55E-06 |
| 716.72973 | 54.95  | 16.40 | 16.16 | 16.69 | 16.69 | 6.81E-09  | 4.32E-02 | 5.38E-03 | 9.19E-03 | 1.14E-07 | 3.86E-07 | 1.00E+00 |
| 716.78554 | 42.49  | 14.74 | 17.08 | 16.93 | 16.71 | 1.31E-24  | 3.53E-14 | 4.29E-14 | 4.72E-14 | 9.15E-01 | 3.86E-01 | 7.67E-01 |
| 716.98794 | 22.81  | 11.81 | 11.92 | 12.60 | 12.51 | 1.29E-01  | 9.92E-01 | 1.94E-01 | 3.28E-01 | 3.48E-01 | 5.11E-01 | 9.96E-01 |
| 717.47235 | 257.88 | 22.32 | 23.66 | 23.07 | 22.58 | 4.98E-10  | 4.68E-10 | 8.82E-04 | 5.72E-01 | 1.77E-02 | 2.35E-06 | 8.31E-02 |
| 717.69812 | 57.48  | 12.89 | 11.30 | 12.89 | 12.83 | 3.00E-11  | 1.87E-09 | 1.00E+00 | 9.94E-01 | 4.41E-09 | 4.68E-08 | 9.96E-01 |
| 717.74605 | 47.97  | 13.52 | 16.83 | 16.47 | 16.32 | 5.17E-42  | 5.11E-15 | 5.11E-15 | 5.11E-15 | 3.46E-01 | 1.04E-01 | 9.02E-01 |

|           |        |       |       |       |       |           |          |          |          |          |          |          |
|-----------|--------|-------|-------|-------|-------|-----------|----------|----------|----------|----------|----------|----------|
| 717.76784 | 42.26  | 13.71 | 12.34 | 12.59 | 12.71 | 9.93E-07  | 1.38E-06 | 9.16E-05 | 1.01E-03 | 7.81E-01 | 5.32E-01 | 9.71E-01 |
| 718.47627 | 256.36 | 21.13 | 22.09 | 21.69 | 20.95 | 1.07E-08  | 2.35E-06 | 1.26E-02 | 7.85E-01 | 1.44E-01 | 9.55E-08 | 9.52E-04 |
| 718.68885 | 58.21  | 14.68 | 11.80 | 15.19 | 14.96 | 3.79E-28  | 4.05E-14 | 2.49E-01 | 7.51E-01 | 7.99E-15 | 3.31E-14 | 8.62E-01 |
| 718.71979 | 55.22  | 13.82 | 12.52 | 12.83 | 12.88 | 2.81E-05  | 2.11E-05 | 1.95E-03 | 5.13E-03 | 6.70E-01 | 5.99E-01 | 9.99E-01 |
| 718.74436 | 48.47  | 12.52 | 14.20 | 13.94 | 13.76 | 4.21E-16  | 4.93E-14 | 1.46E-11 | 1.38E-08 | 5.61E-01 | 1.34E-01 | 7.95E-01 |
| 718.80254 | 42.51  | 14.84 | 14.65 | 14.14 | 15.03 | 1.00E-02  | 8.88E-01 | 3.90E-02 | 8.99E-01 | 2.32E-01 | 5.26E-01 | 7.91E-03 |
| 718.82416 | 46.08  | 15.61 | 18.02 | 18.15 | 18.15 | 4.96E-28  | 3.72E-14 | 2.24E-14 | 3.24E-14 | 9.49E-01 | 9.46E-01 | 1.00E+00 |
| 719.47268 | 272.14 | 20.74 | 20.11 | 20.03 | 20.25 | 2.68E-01  | 3.75E-01 | 2.67E-01 | 6.09E-01 | 9.98E-01 | 9.88E-01 | 9.55E-01 |
| 719.48806 | 274.11 | 28.72 | 29.27 | 28.92 | 28.59 | 3.73E-07  | 2.13E-05 | 3.06E-01 | 7.05E-01 | 1.73E-02 | 4.82E-07 | 3.71E-02 |
| 719.72414 | 52.82  | 13.67 | 13.24 | 13.21 | 13.36 | 6.84E-03  | 1.86E-02 | 8.72E-03 | 1.66E-01 | 9.97E-01 | 8.64E-01 | 7.54E-01 |
| 719.74623 | 48.45  | 12.54 | 12.88 | 12.49 | 13.22 | 3.91E-05  | 1.48E-01 | 9.89E-01 | 2.65E-04 | 8.12E-02 | 1.79E-01 | 1.05E-04 |
| 719.7928  | 40.69  | 11.82 | 12.68 | 12.14 | 12.54 | 1.59E-02  | 1.65E-02 | 6.68E-01 | 7.42E-02 | 2.65E-01 | 9.66E-01 | 5.57E-01 |
| 719.86795 | 51.37  | 12.95 | 10.83 | 11.70 | 12.33 | 1.34E-16  | 4.30E-14 | 4.58E-07 | 4.33E-02 | 1.15E-03 | 9.14E-09 | 3.99E-02 |
| 719.87542 | 58.71  | 15.60 | 12.66 | 15.95 | 16.21 | 7.45E-42  | 5.11E-15 | 3.69E-01 | 3.50E-02 | 5.11E-15 | 5.11E-15 | 6.67E-01 |
| 720.31391 | 202.61 | 12.95 | 13.86 | 12.45 | 13.48 | 1.67E-04  | 2.34E-02 | 3.86E-01 | 3.71E-01 | 1.20E-04 | 6.63E-01 | 1.19E-02 |
| 720.47515 | 270.58 | 18.67 | 17.49 | 17.13 | 17.08 | 4.87E-04  | 2.59E-02 | 1.48E-03 | 1.56E-03 | 8.41E-01 | 7.98E-01 | 9.99E-01 |
| 720.49182 | 273.14 | 27.57 | 28.03 | 27.52 | 27.28 | 6.70E-07  | 1.28E-03 | 9.87E-01 | 1.19E-01 | 4.94E-04 | 2.05E-07 | 2.46E-01 |
| 720.72255 | 45.55  | 13.45 | 12.97 | 13.00 | 13.38 | 6.95E-03  | 2.74E-02 | 3.73E-02 | 9.81E-01 | 9.99E-01 | 1.02E-01 | 1.31E-01 |
| 720.73853 | 52.58  | 13.79 | 12.72 | 13.07 | 13.58 | 2.07E-03  | 2.16E-03 | 7.23E-02 | 9.00E-01 | 6.51E-01 | 3.30E-02 | 3.62E-01 |
| 720.76043 | 43.66  | 17.32 | 18.18 | 18.24 | 18.28 | 3.94E-19  | 2.96E-13 | 5.16E-14 | 4.56E-14 | 9.64E-01 | 8.29E-01 | 9.79E-01 |
| 720.78218 | 48.07  | 16.84 | 19.80 | 19.94 | 19.71 | 1.70E-37  | 5.11E-15 | 5.11E-15 | 5.33E-15 | 9.36E-01 | 9.80E-01 | 7.71E-01 |
| 720.82023 | 41.65  | 10.93 | 14.98 | 14.39 | 15.21 | 6.61E-16  | 1.40E-12 | 7.69E-10 | 3.51E-13 | 6.89E-01 | 9.74E-01 | 4.37E-01 |
| 720.86195 | 57.33  | 12.21 | 12.82 | 10.26 | 11.07 | 5.25E-43  | 3.21E-04 | 5.11E-15 | 2.00E-11 | 5.11E-15 | 2.58E-14 | 3.70E-06 |
| 721.10089 | 17.89  | 11.48 | 13.05 | 12.50 | 12.28 | 1.13E-04  | 3.38E-05 | 1.39E-02 | 9.93E-02 | 3.79E-01 | 1.37E-01 | 9.26E-01 |
| 721.35613 | 61.96  | 7.02  | 20.10 | 6.36  | 6.32  | 9.07E-136 | 5.11E-15 | 5.93E-02 | 5.22E-02 | 5.11E-15 | 5.11E-15 | 9.99E-01 |
| 721.35764 | 173.5  | 6.36  | 10.98 | 11.04 | 6.11  | 1.40E-31  | 4.20E-14 | 3.89E-14 | 9.51E-01 | 9.99E-01 | 4.24E-14 | 4.06E-14 |
| 721.492   | 273.85 | 25.83 | 25.59 | 25.40 | 24.96 | 6.24E-05  | 5.32E-01 | 7.72E-02 | 2.01E-05 | 7.37E-01 | 5.11E-03 | 8.21E-02 |
| 721.76523 | 41.4   | 13.59 | 13.40 | 13.07 | 13.37 | 8.30E-02  | 7.86E-01 | 4.71E-02 | 6.96E-01 | 3.70E-01 | 9.98E-01 | 4.98E-01 |
| 721.78478 | 47.49  | 12.91 | 13.55 | 13.62 | 13.85 | 2.10E-07  | 4.95E-04 | 7.98E-05 | 2.03E-07 | 9.78E-01 | 2.89E-01 | 5.01E-01 |
| 722.0435  | 22.33  | 15.59 | 16.90 | 16.51 | 15.81 | 7.68E-03  | 9.89E-03 | 1.15E-01 | 9.58E-01 | 7.98E-01 | 6.33E-02 | 3.66E-01 |
| 722.35009 | 64.02  | 7.67  | 16.76 | 7.08  | 7.21  | 1.66E-102 | 5.11E-15 | 1.23E-01 | 3.44E-01 | 5.11E-15 | 5.11E-15 | 9.67E-01 |
| 722.50082 | 266.7  | 23.97 | 22.88 | 22.86 | 22.52 | 3.43E-08  | 4.45E-05 | 2.59E-05 | 6.59E-08 | 1.00E+00 | 4.82E-01 | 5.22E-01 |
| 722.6973  | 64.46  | 14.55 | 11.04 | 13.81 | 13.94 | 4.65E-48  | 5.11E-15 | 5.75E-04 | 9.49E-03 | 5.11E-15 | 5.11E-15 | 9.16E-01 |
| 722.71905 | 46.76  | 19.35 | 20.41 | 20.86 | 20.65 | 9.92E-43  | 1.29E-14 | 5.11E-15 | 5.11E-15 | 1.32E-05 | 5.23E-02 | 1.41E-01 |
| 722.75924 | 49.99  | 15.90 | 16.48 | 16.42 | 16.64 | 1.43E-07  | 4.48E-05 | 2.16E-04 | 2.18E-07 | 9.77E-01 | 6.23E-01 | 3.73E-01 |
| 722.77992 | 48.2   | 13.20 | 15.23 | 15.43 | 15.38 | 1.16E-25  | 4.09E-14 | 3.31E-14 | 4.15E-14 | 7.89E-01 | 9.16E-01 | 9.94E-01 |
| 722.97266 | 283.64 | 15.47 | 15.29 | 13.55 | 14.08 | 4.64E-09  | 9.45E-01 | 8.67E-08 | 2.98E-04 | 3.09E-06 | 3.22E-03 | 4.25E-01 |
| 723.36468 | 55.89  | 7.94  | 13.07 | 7.44  | 7.72  | 4.23E-80  | 5.11E-15 | 6.51E-02 | 7.21E-01 | 5.11E-15 | 5.11E-15 | 5.49E-01 |
| 723.36969 | 179.37 | 7.31  | 11.32 | 10.76 | 7.31  | 8.36E-24  | 4.35E-14 | 2.09E-13 | 1.00E+00 | 5.61E-01 | 4.49E-14 | 2.54E-12 |
| 723.48116 | 287.37 | 18.45 | 18.98 | 17.33 | 17.78 | 5.24E-04  | 5.47E-01 | 2.71E-02 | 3.67E-01 | 4.38E-04 | 2.54E-02 | 7.06E-01 |
| 723.49837 | 269.99 | 22.40 | 20.92 | 20.84 | 20.63 | 3.76E-12  | 4.80E-08 | 5.24E-09 | 1.94E-10 | 9.86E-01 | 6.83E-01 | 8.60E-01 |
| 723.68824 | 57.58  | 12.55 | 11.53 | 13.48 | 13.28 | 3.99E-11  | 1.30E-03 | 3.49E-03 | 4.53E-02 | 1.46E-10 | 2.73E-08 | 8.94E-01 |
| 723.72225 | 46.79  | 13.94 | 13.51 | 14.16 | 14.12 | 1.31E-08  | 4.10E-04 | 1.46E-01 | 3.42E-01 | 3.90E-08 | 7.46E-07 | 9.81E-01 |
| 723.72848 | 52.24  | 14.22 | 14.19 | 14.59 | 14.83 | 2.67E-07  | 9.96E-01 | 1.08E-02 | 6.20E-06 | 7.20E-03 | 4.37E-06 | 2.02E-01 |
| 723.78138 | 47.23  | 11.01 | 12.67 | 12.35 | 12.20 | 3.54E-06  | 3.74E-06 | 2.59E-04 | 2.47E-03 | 7.58E-01 | 5.04E-01 | 9.71E-01 |

|           |        |       |       |       |       |           |          |          |          |          |          |          |
|-----------|--------|-------|-------|-------|-------|-----------|----------|----------|----------|----------|----------|----------|
| 723.88175 | 49.58  | 9.66  | 12.42 | 12.45 | 12.09 | 9.97E-20  | 4.31E-14 | 4.31E-14 | 3.00E-12 | 1.00E+00 | 7.40E-01 | 6.76E-01 |
| 723.98129 | 282.08 | 18.79 | 18.89 | 18.37 | 17.72 | 5.75E-03  | 9.92E-01 | 5.98E-01 | 1.27E-02 | 4.45E-01 | 7.05E-03 | 2.61E-01 |
| 724.31028 | 204.45 | 12.55 | 11.69 | 11.34 | 12.21 | 8.07E-04  | 3.09E-02 | 6.79E-04 | 7.06E-01 | 6.94E-01 | 3.92E-01 | 4.14E-02 |
| 724.40503 | 177.83 | 10.33 | 15.17 | 15.82 | 9.40  | 1.47E-29  | 5.00E-14 | 4.17E-14 | 3.59E-01 | 6.70E-01 | 4.31E-14 | 2.69E-14 |
| 724.48573 | 282.29 | 17.22 | 18.62 | 18.15 | 17.58 | 1.44E-04  | 1.16E-04 | 1.91E-02 | 6.94E-01 | 4.86E-01 | 1.27E-02 | 3.21E-01 |
| 724.49878 | 284.73 | 12.70 | 13.29 | 14.60 | 13.27 | 1.89E-02  | 7.67E-01 | 1.00E-02 | 8.02E-01 | 1.54E-01 | 1.00E+00 | 1.58E-01 |
| 724.52182 | 283.12 | 19.58 | 17.12 | 16.70 | 17.03 | 2.78E-19  | 5.61E-13 | 4.40E-14 | 3.80E-13 | 5.53E-01 | 9.94E-01 | 7.39E-01 |
| 724.65625 | 61.68  | 16.99 | 16.74 | 18.13 | 17.68 | 1.80E-25  | 1.63E-01 | 4.37E-14 | 5.11E-07 | 1.95E-14 | 2.18E-11 | 2.17E-03 |
| 724.68211 | 50.28  | 13.28 | 11.62 | 12.29 | 12.63 | 1.52E-14  | 4.44E-14 | 1.73E-06 | 5.49E-03 | 2.91E-03 | 3.70E-06 | 3.04E-01 |
| 724.68996 | 57.75  | 13.00 | 11.70 | 13.11 | 13.14 | 7.84E-09  | 1.40E-06 | 9.66E-01 | 9.46E-01 | 2.46E-07 | 3.92E-07 | 1.00E+00 |
| 724.71689 | 53.95  | 18.39 | 19.20 | 19.74 | 19.51 | 5.88E-41  | 4.37E-14 | 5.11E-15 | 5.11E-15 | 8.09E-09 | 2.39E-03 | 5.28E-02 |
| 724.76595 | 46.16  | 12.93 | 12.95 | 12.72 | 13.21 | 1.41E-01  | 1.00E+00 | 7.24E-01 | 4.93E-01 | 6.77E-01 | 5.84E-01 | 8.52E-02 |
| 724.98819 | 287.95 | 17.28 | 18.53 | 16.93 | 16.62 | 1.90E-07  | 7.10E-04 | 6.88E-01 | 1.91E-01 | 1.10E-05 | 2.92E-07 | 7.95E-01 |
| 725.12246 | 63.44  | 12.43 | 16.25 | 10.36 | 11.00 | 2.97E-126 | 5.11E-15 | 5.11E-15 | 6.00E-15 | 5.11E-15 | 5.11E-15 | 1.14E-06 |
| 725.49025 | 282.9  | 15.27 | 17.81 | 16.43 | 15.42 | 3.10E-14  | 3.23E-13 | 1.38E-03 | 9.62E-01 | 1.61E-04 | 6.64E-11 | 1.34E-02 |
| 725.49982 | 288.09 | 14.57 | 15.42 | 14.87 | 14.22 | 4.88E-06  | 7.08E-04 | 4.89E-01 | 4.01E-01 | 7.03E-02 | 2.36E-06 | 2.26E-02 |
| 725.53331 | 292.19 | 17.05 | 16.24 | 16.08 | 16.14 | 1.02E-05  | 9.36E-04 | 3.66E-05 | 2.29E-04 | 8.82E-01 | 9.70E-01 | 9.93E-01 |
| 725.6859  | 50.1   | 13.02 | 10.45 | 12.32 | 12.57 | 3.77E-20  | 3.99E-14 | 2.35E-02 | 2.94E-01 | 2.16E-11 | 2.81E-13 | 7.60E-01 |
| 725.71647 | 56.66  | 14.01 | 11.69 | 12.46 | 12.68 | 1.36E-14  | 4.62E-14 | 6.41E-08 | 1.01E-05 | 2.47E-02 | 2.60E-03 | 8.52E-01 |
| 725.72531 | 51.93  | 13.40 | 12.33 | 12.14 | 12.61 | 1.10E-11  | 2.05E-08 | 2.57E-11 | 8.49E-05 | 7.01E-01 | 4.25E-01 | 4.96E-02 |
| 725.73316 | 48.92  | 13.11 | 14.24 | 13.87 | 13.96 | 3.67E-11  | 2.92E-11 | 8.29E-06 | 9.53E-07 | 9.06E-02 | 3.46E-01 | 9.28E-01 |
| 725.74105 | 42.37  | 13.01 | 13.35 | 13.34 | 13.45 | 1.59E-01  | 3.32E-01 | 3.71E-01 | 1.52E-01 | 1.00E+00 | 9.68E-01 | 9.48E-01 |
| 725.99576 | 287.29 | 13.81 | 15.42 | 15.51 | 13.66 | 3.49E-13  | 2.04E-07 | 2.82E-08 | 9.53E-01 | 9.89E-01 | 6.77E-08 | 9.98E-09 |
| 726.11929 | 63.75  | 11.59 | 12.32 | 9.89  | 10.43 | 5.64E-56  | 1.12E-08 | 5.11E-15 | 4.26E-14 | 5.11E-15 | 5.11E-15 | 8.71E-05 |
| 726.13242 | 55.22  | 12.20 | 12.73 | 10.29 | 10.93 | 8.85E-67  | 2.23E-06 | 5.11E-15 | 6.22E-15 | 5.11E-15 | 5.11E-15 | 6.25E-08 |
| 726.54465 | 290.57 | 17.35 | 15.95 | 15.52 | 16.22 | 1.69E-12  | 6.26E-08 | 1.14E-12 | 3.16E-05 | 2.82E-01 | 6.88E-01 | 2.41E-02 |
| 726.65367 | 63.24  | 14.90 | 12.69 | 16.33 | 15.74 | 2.10E-32  | 5.02E-14 | 2.39E-07 | 7.69E-03 | 5.11E-15 | 1.78E-14 | 1.21E-01 |
| 726.67263 | 58.17  | 17.31 | 17.41 | 18.62 | 18.23 | 8.59E-21  | 8.78E-01 | 4.24E-14 | 3.65E-09 | 5.51E-14 | 3.99E-07 | 3.54E-02 |
| 726.71437 | 55.95  | 15.49 | 14.83 | 16.15 | 15.89 | 1.87E-22  | 2.37E-07 | 2.84E-07 | 6.39E-03 | 2.58E-14 | 5.22E-14 | 1.46E-01 |
| 726.73385 | 49.76  | 13.96 | 14.58 | 14.59 | 14.69 | 1.08E-11  | 4.13E-08 | 2.69E-08 | 4.25E-10 | 1.00E+00 | 7.76E-01 | 7.84E-01 |
| 726.78957 | 46.84  | 14.19 | 14.12 | 13.42 | 14.13 | 9.66E-03  | 9.93E-01 | 1.33E-02 | 9.95E-01 | 3.68E-02 | 1.00E+00 | 4.24E-02 |
| 726.8107  | 43.05  | 15.37 | 19.01 | 18.70 | 18.73 | 1.86E-27  | 1.82E-14 | 4.06E-14 | 4.24E-14 | 7.68E-01 | 8.38E-01 | 1.00E+00 |
| 727.11816 | 63.43  | 12.13 | 12.94 | 10.88 | 11.84 | 1.19E-06  | 1.00E-01 | 2.51E-03 | 8.61E-01 | 2.09E-07 | 1.85E-02 | 4.79E-02 |
| 727.52972 | 281.16 | 14.96 | 21.16 | 20.43 | 21.32 | 5.27E-54  | 5.11E-15 | 5.11E-15 | 5.11E-15 | 1.57E-01 | 9.72E-01 | 6.46E-02 |
| 727.55075 | 285.6  | 16.27 | 13.91 | 13.44 | 14.19 | 1.48E-12  | 1.11E-08 | 5.18E-12 | 9.90E-07 | 6.10E-01 | 9.02E-01 | 2.35E-01 |
| 727.71113 | 55.05  | 13.35 | 12.84 | 13.38 | 12.96 | 1.41E-01  | 2.55E-01 | 9.99E-01 | 5.21E-01 | 2.23E-01 | 9.75E-01 | 4.69E-01 |
| 727.73403 | 49.71  | 12.92 | 12.89 | 12.62 | 12.95 | 1.80E-01  | 9.97E-01 | 2.43E-01 | 9.98E-01 | 3.69E-01 | 9.85E-01 | 2.17E-01 |
| 727.77033 | 46.9   | 10.13 | 11.95 | 11.23 | 11.55 | 7.21E-05  | 4.31E-05 | 2.89E-02 | 3.20E-03 | 2.80E-01 | 7.74E-01 | 8.62E-01 |
| 727.77879 | 40.61  | 10.48 | 12.96 | 11.89 | 12.73 | 1.19E-09  | 4.79E-09 | 1.60E-03 | 2.59E-07 | 3.58E-02 | 9.41E-01 | 1.65E-01 |
| 727.81293 | 38.81  | 11.92 | 12.50 | 12.28 | 12.58 | 2.12E-01  | 3.07E-01 | 7.06E-01 | 2.20E-01 | 9.12E-01 | 9.96E-01 | 8.18E-01 |
| 728.53032 | 278.02 | 13.17 | 18.29 | 17.64 | 18.12 | 6.86E-35  | 5.11E-15 | 1.02E-14 | 5.33E-15 | 3.53E-01 | 9.77E-01 | 6.28E-01 |
| 728.65883 | 55.59  | 12.43 | 12.06 | 10.49 | 11.31 | 2.52E-05  | 8.08E-01 | 2.06E-05 | 4.37E-02 | 1.30E-03 | 3.15E-01 | 2.23E-01 |
| 728.66965 | 57.94  | 16.95 | 16.49 | 17.99 | 17.64 | 8.19E-29  | 7.69E-04 | 4.26E-14 | 1.62E-07 | 5.33E-15 | 4.24E-14 | 2.52E-02 |
| 728.70719 | 55.04  | 13.62 | 12.49 | 12.52 | 12.92 | 7.15E-11  | 1.79E-09 | 3.40E-09 | 4.78E-04 | 9.98E-01 | 8.86E-02 | 1.24E-01 |
| 728.7257  | 50.37  | 12.38 | 11.45 | 12.34 | 13.09 | 1.71E-03  | 8.28E-02 | 1.00E+00 | 2.89E-01 | 1.17E-01 | 5.25E-04 | 2.58E-01 |

|           |        |       |       |       |       |          |          |          |          |          |          |          |
|-----------|--------|-------|-------|-------|-------|----------|----------|----------|----------|----------|----------|----------|
| 728.74808 | 46.13  | 16.99 | 18.76 | 18.24 | 18.32 | 6.82E-32 | 5.11E-15 | 4.23E-14 | 4.26E-14 | 4.99E-04 | 7.16E-03 | 9.25E-01 |
| 728.7732  | 47.09  | 12.54 | 12.60 | 12.07 | 12.53 | 2.89E-02 | 9.89E-01 | 6.91E-02 | 1.00E+00 | 3.75E-02 | 9.87E-01 | 1.03E-01 |
| 728.80707 | 43.81  | 15.06 | 17.25 | 16.81 | 17.05 | 1.08E-21 | 4.10E-14 | 1.92E-13 | 4.29E-14 | 2.06E-01 | 8.31E-01 | 7.16E-01 |
| 728.88962 | 53.58  | 13.16 | 13.02 | 11.02 | 11.74 | 3.22E-46 | 7.24E-01 | 5.11E-15 | 3.64E-14 | 5.11E-15 | 4.27E-14 | 1.18E-06 |
| 728.91599 | 61.17  | 13.93 | 14.36 | 12.02 | 12.70 | 3.32E-63 | 2.52E-04 | 5.11E-15 | 1.20E-14 | 5.11E-15 | 5.11E-15 | 1.27E-08 |
| 729.11715 | 22.1   | 15.58 | 17.06 | 16.95 | 15.72 | 1.68E-05 | 3.85E-04 | 1.05E-03 | 9.80E-01 | 9.91E-01 | 3.37E-03 | 7.89E-03 |
| 729.50981 | 228.18 | 18.34 | 17.00 | 17.89 | 17.79 | 3.16E-03 | 1.12E-03 | 5.66E-01 | 4.25E-01 | 7.02E-02 | 1.53E-01 | 9.93E-01 |
| 729.53678 | 286.2  | 13.81 | 15.75 | 15.00 | 15.81 | 1.67E-09 | 4.60E-08 | 1.32E-03 | 3.61E-08 | 1.12E-01 | 9.97E-01 | 8.11E-02 |
| 729.75109 | 46.77  | 13.24 | 13.64 | 13.19 | 13.56 | 1.83E-02 | 8.40E-02 | 9.87E-01 | 2.48E-01 | 4.22E-02 | 9.70E-01 | 1.44E-01 |
| 730.51363 | 228.21 | 17.23 | 15.68 | 16.63 | 16.94 | 2.26E-05 | 1.08E-05 | 2.30E-01 | 8.09E-01 | 1.78E-02 | 1.15E-03 | 7.91E-01 |
| 730.66458 | 59.01  | 13.81 | 11.69 | 12.88 | 13.19 | 2.95E-24 | 7.11E-15 | 1.31E-06 | 3.31E-03 | 1.33E-09 | 3.13E-13 | 3.54E-01 |
| 730.68006 | 63.25  | 13.92 | 10.31 | 11.48 | 11.90 | 5.48E-30 | 5.11E-15 | 4.44E-14 | 7.97E-12 | 1.21E-04 | 1.93E-07 | 4.17E-01 |
| 730.70576 | 57.45  | 14.61 | 12.62 | 14.56 | 14.31 | 1.04E-13 | 3.87E-12 | 9.96E-01 | 6.76E-01 | 3.43E-11 | 2.09E-08 | 8.06E-01 |
| 730.74518 | 50.85  | 14.04 | 13.89 | 13.06 | 13.84 | 2.50E-04 | 9.17E-01 | 2.23E-04 | 8.29E-01 | 3.76E-03 | 9.96E-01 | 1.02E-02 |
| 730.76451 | 46.3   | 16.86 | 19.55 | 19.29 | 19.20 | 5.53E-41 | 5.11E-15 | 5.11E-15 | 5.11E-15 | 4.67E-01 | 2.43E-01 | 9.66E-01 |
| 731.4878  | 263.69 | 20.12 | 19.72 | 20.39 | 19.99 | 2.36E-02 | 2.39E-01 | 5.65E-01 | 9.45E-01 | 1.15E-02 | 6.00E-01 | 2.88E-01 |
| 731.67289 | 59.33  | 13.57 | 11.16 | 12.67 | 12.53 | 6.66E-23 | 9.99E-15 | 7.93E-05 | 8.12E-06 | 4.46E-11 | 7.16E-09 | 9.14E-01 |
| 731.76723 | 42.89  | 11.71 | 13.18 | 12.87 | 13.11 | 1.21E-05 | 4.44E-05 | 1.77E-03 | 1.81E-04 | 7.83E-01 | 9.97E-01 | 8.95E-01 |
| 732.48864 | 247.77 | 19.14 | 17.79 | 18.14 | 17.82 | 7.11E-09 | 8.13E-08 | 9.88E-05 | 3.56E-07 | 4.33E-01 | 9.99E-01 | 5.39E-01 |
| 732.67256 | 50.69  | 12.80 | 11.16 | 12.24 | 11.99 | 2.07E-10 | 2.47E-11 | 5.70E-02 | 2.68E-03 | 2.39E-05 | 3.05E-03 | 7.05E-01 |
| 732.70266 | 58.98  | 15.83 | 13.86 | 16.00 | 15.83 | 1.83E-22 | 4.43E-14 | 8.58E-01 | 1.00E+00 | 4.31E-14 | 4.29E-14 | 8.73E-01 |
| 732.76177 | 44.51  | 15.35 | 17.57 | 17.43 | 17.39 | 8.97E-33 | 5.33E-15 | 7.33E-15 | 1.78E-14 | 8.61E-01 | 7.63E-01 | 9.96E-01 |
| 732.77104 | 42.48  | 12.47 | 13.41 | 12.57 | 13.18 | 7.04E-03 | 1.48E-02 | 9.89E-01 | 1.16E-01 | 4.18E-02 | 9.01E-01 | 2.32E-01 |
| 732.83958 | 41.09  | 13.16 | 13.93 | 14.34 | 14.63 | 3.70E-03 | 2.44E-01 | 2.10E-02 | 3.29E-03 | 7.57E-01 | 3.70E-01 | 9.08E-01 |
| 733.50122 | 290.84 | 22.78 | 22.35 | 22.34 | 22.25 | 6.14E-02 | 1.82E-01 | 1.62E-01 | 6.95E-02 | 1.00E+00 | 9.65E-01 | 9.72E-01 |
| 733.52727 | 226.94 | 16.72 | 15.10 | 16.02 | 16.39 | 1.71E-10 | 6.82E-11 | 1.02E-02 | 4.77E-01 | 5.50E-04 | 1.05E-06 | 4.01E-01 |
| 733.5651  | 251.6  | 16.66 | 16.69 | 16.49 | 17.10 | 1.99E-01 | 1.00E+00 | 9.31E-01 | 3.91E-01 | 9.00E-01 | 4.79E-01 | 1.49E-01 |
| 733.67737 | 58.9   | 11.93 | 9.75  | 13.39 | 12.69 | 7.94E-23 | 3.57E-10 | 3.76E-05 | 9.51E-02 | 2.11E-14 | 4.65E-14 | 1.57E-01 |
| 733.71975 | 51.44  | 13.07 | 13.85 | 13.77 | 13.85 | 1.09E-11 | 1.69E-09 | 4.72E-08 | 4.45E-09 | 9.15E-01 | 1.00E+00 | 9.22E-01 |
| 733.72774 | 44.97  | 12.70 | 12.86 | 12.65 | 13.23 | 4.07E-03 | 7.65E-01 | 9.89E-01 | 9.45E-03 | 5.89E-01 | 1.38E-01 | 4.32E-03 |
| 733.74636 | 48.37  | 13.51 | 12.31 | 12.06 | 12.00 | 9.00E-06 | 1.68E-03 | 6.70E-05 | 6.45E-05 | 8.73E-01 | 8.09E-01 | 9.99E-01 |
| 734.47704 | 281.75 | 18.04 | 17.95 | 17.45 | 17.91 | 3.78E-01 | 9.93E-01 | 3.48E-01 | 9.83E-01 | 5.38E-01 | 1.00E+00 | 6.21E-01 |
| 734.50717 | 290.03 | 21.49 | 21.00 | 21.04 | 20.91 | 5.40E-02 | 1.32E-01 | 1.82E-01 | 6.40E-02 | 9.98E-01 | 9.84E-01 | 9.53E-01 |
| 734.69844 | 57.83  | 13.88 | 12.25 | 12.86 | 13.25 | 5.36E-09 | 1.24E-09 | 2.12E-04 | 5.99E-02 | 7.23E-02 | 8.19E-04 | 4.26E-01 |
| 734.72368 | 51.69  | 12.65 | 13.21 | 13.24 | 13.61 | 1.91E-07 | 2.20E-03 | 8.66E-04 | 4.41E-08 | 9.97E-01 | 7.30E-02 | 1.13E-01 |
| 734.75127 | 42.69  | 12.60 | 13.11 | 13.02 | 12.92 | 1.49E-01 | 1.31E-01 | 2.78E-01 | 5.48E-01 | 9.79E-01 | 8.64E-01 | 9.78E-01 |
| 734.77669 | 46.22  | 14.49 | 14.19 | 13.96 | 14.80 | 1.79E-02 | 6.70E-01 | 1.87E-01 | 6.46E-01 | 8.34E-01 | 1.23E-01 | 1.35E-02 |
| 734.7975  | 47.54  | 16.20 | 18.24 | 18.45 | 18.36 | 1.72E-36 | 5.77E-15 | 5.11E-15 | 5.33E-15 | 5.88E-01 | 9.08E-01 | 9.45E-01 |
| 734.92444 | 61.06  | 12.56 | 14.52 | 10.41 | 11.25 | 2.26E-73 | 5.11E-15 | 5.11E-15 | 5.00E-14 | 5.11E-15 | 5.11E-15 | 8.58E-07 |
| 735.48151 | 283.57 | 19.09 | 17.92 | 17.40 | 17.66 | 8.24E-08 | 5.30E-04 | 1.11E-07 | 1.90E-05 | 2.93E-01 | 8.19E-01 | 8.34E-01 |
| 735.50905 | 290.69 | 18.99 | 18.40 | 18.50 | 18.29 | 4.71E-02 | 1.18E-01 | 2.31E-01 | 4.89E-02 | 9.86E-01 | 9.77E-01 | 8.78E-01 |
| 735.54261 | 253.74 | 15.37 | 15.20 | 15.58 | 14.97 | 4.64E-01 | 9.72E-01 | 9.40E-01 | 7.28E-01 | 7.59E-01 | 9.33E-01 | 4.03E-01 |
| 735.69601 | 57.06  | 13.14 | 11.34 | 13.55 | 12.56 | 2.25E-07 | 1.86E-05 | 7.01E-01 | 4.31E-01 | 1.88E-07 | 1.31E-02 | 6.13E-02 |
| 735.72163 | 52.7   | 11.93 | 12.60 | 12.60 | 12.82 | 9.26E-04 | 1.85E-02 | 1.51E-02 | 9.14E-04 | 1.00E+00 | 7.82E-01 | 7.98E-01 |
| 735.76716 | 45.94  | 13.20 | 13.67 | 13.31 | 13.64 | 9.07E-04 | 3.38E-03 | 8.51E-01 | 1.04E-02 | 4.55E-02 | 9.95E-01 | 9.84E-02 |

|           |        |       |       |       |       |           |          |          |          |          |          |          |
|-----------|--------|-------|-------|-------|-------|-----------|----------|----------|----------|----------|----------|----------|
| 735.8504  | 57.84  | 15.03 | 10.37 | 14.68 | 15.17 | 8.70E-55  | 5.11E-15 | 4.77E-01 | 9.40E-01 | 5.11E-15 | 5.11E-15 | 2.20E-01 |
| 735.98128 | 287.7  | 16.51 | 16.01 | 15.88 | 15.13 | 2.32E-06  | 1.66E-01 | 4.09E-02 | 3.62E-07 | 9.44E-01 | 3.21E-03 | 1.68E-02 |
| 736.16105 | 16.92  | 11.91 | 15.52 | 14.95 | 15.43 | 3.47E-30  | 6.88E-15 | 4.11E-14 | 1.44E-14 | 2.38E-01 | 9.92E-01 | 4.11E-01 |
| 736.17146 | 20.8   | 12.80 | 14.97 | 14.65 | 14.92 | 3.77E-18  | 4.62E-14 | 9.07E-12 | 1.04E-13 | 5.77E-01 | 9.97E-01 | 7.23E-01 |
| 736.49273 | 261.24 | 19.08 | 18.91 | 18.35 | 18.98 | 1.37E-02  | 8.85E-01 | 1.13E-02 | 9.73E-01 | 1.00E-01 | 9.93E-01 | 5.94E-02 |
| 736.52077 | 225.12 | 18.79 | 18.73 | 20.04 | 19.54 | 6.64E-07  | 9.96E-01 | 1.13E-05 | 2.42E-02 | 8.21E-06 | 1.67E-02 | 2.60E-01 |
| 736.70657 | 58.16  | 12.76 | 11.69 | 12.83 | 12.80 | 8.97E-04  | 4.33E-03 | 9.96E-01 | 9.99E-01 | 2.62E-03 | 5.35E-03 | 1.00E+00 |
| 736.73445 | 53.15  | 17.15 | 17.40 | 17.76 | 17.77 | 1.39E-11  | 3.76E-02 | 1.64E-09 | 2.43E-09 | 1.14E-03 | 1.02E-03 | 9.99E-01 |
| 736.75674 | 50.53  | 17.12 | 19.40 | 19.73 | 19.49 | 1.38E-39  | 5.11E-15 | 5.11E-15 | 5.11E-15 | 2.46E-01 | 9.53E-01 | 5.71E-01 |
| 736.78597 | 38.29  | 12.52 | 12.94 | 12.87 | 13.24 | 1.81E-03  | 9.09E-02 | 2.03E-01 | 5.98E-04 | 9.80E-01 | 3.69E-01 | 1.86E-01 |
| 736.79364 | 44.37  | 14.37 | 16.73 | 16.54 | 16.67 | 1.65E-36  | 5.11E-15 | 5.33E-15 | 5.11E-15 | 6.96E-01 | 9.89E-01 | 8.79E-01 |
| 736.98727 | 288.75 | 15.54 | 16.28 | 15.90 | 14.85 | 7.70E-06  | 2.80E-02 | 5.36E-01 | 4.99E-02 | 4.74E-01 | 3.04E-06 | 1.02E-03 |
| 737.16461 | 19.75  | 12.48 | 13.08 | 12.76 | 13.52 | 6.44E-09  | 8.02E-04 | 2.47E-01 | 2.88E-09 | 1.95E-01 | 4.09E-02 | 3.69E-05 |
| 737.33418 | 56.21  | 10.41 | 19.18 | 8.86  | 9.68  | 2.52E-102 | 5.11E-15 | 2.41E-07 | 4.92E-02 | 5.11E-15 | 5.11E-15 | 2.50E-02 |
| 737.4763  | 286.72 | 14.27 | 15.85 | 14.87 | 15.67 | 2.45E-07  | 9.37E-07 | 1.61E-01 | 3.04E-05 | 6.49E-03 | 9.35E-01 | 4.75E-02 |
| 737.49467 | 278.17 | 17.43 | 17.45 | 17.05 | 17.09 | 1.61E-01  | 1.00E+00 | 3.22E-01 | 4.35E-01 | 3.05E-01 | 4.12E-01 | 9.99E-01 |
| 737.52522 | 219.67 | 17.45 | 17.45 | 18.85 | 18.26 | 5.27E-07  | 1.00E+00 | 4.75E-06 | 2.39E-02 | 9.65E-06 | 3.01E-02 | 1.88E-01 |
| 737.76127 | 48.58  | 12.56 | 13.36 | 13.46 | 13.76 | 6.28E-07  | 1.13E-03 | 1.51E-04 | 5.44E-07 | 9.67E-01 | 2.81E-01 | 5.30E-01 |
| 737.83742 | 37.12  | 11.79 | 11.48 | 12.13 | 11.68 | 6.03E-01  | 9.16E-01 | 8.85E-01 | 9.96E-01 | 5.37E-01 | 9.78E-01 | 8.03E-01 |
| 738.15675 | 19.55  | 9.38  | 12.35 | 12.10 | 12.26 | 2.59E-27  | 2.38E-14 | 4.11E-14 | 3.89E-14 | 7.93E-01 | 9.86E-01 | 9.46E-01 |
| 738.32726 | 64.13  | 14.97 | 20.30 | 13.55 | 13.99 | 1.43E-133 | 5.11E-15 | 1.53E-14 | 3.26E-12 | 5.11E-15 | 5.11E-15 | 5.29E-03 |
| 738.48255 | 286.85 | 14.07 | 15.48 | 14.43 | 14.74 | 1.41E-04  | 5.53E-05 | 6.47E-01 | 1.54E-01 | 5.93E-03 | 1.13E-01 | 7.72E-01 |
| 738.50909 | 252.47 | 21.52 | 19.12 | 20.32 | 19.20 | 1.19E-13  | 6.19E-12 | 1.09E-03 | 8.68E-11 | 1.37E-03 | 9.95E-01 | 4.46E-03 |
| 738.69286 | 55.47  | 18.88 | 19.54 | 20.23 | 19.99 | 1.39E-33  | 2.67E-10 | 5.11E-15 | 1.87E-14 | 1.33E-10 | 8.10E-05 | 8.07E-02 |
| 738.73426 | 53.36  | 15.82 | 15.41 | 15.94 | 16.07 | 3.83E-04  | 3.92E-02 | 8.28E-01 | 3.72E-01 | 3.64E-03 | 3.19E-04 | 8.65E-01 |
| 738.75459 | 50.35  | 13.86 | 15.26 | 15.70 | 15.56 | 9.58E-22  | 2.72E-12 | 4.29E-14 | 4.37E-14 | 9.05E-02 | 3.96E-01 | 8.96E-01 |
| 739.3184  | 56.59  | 12.94 | 14.31 | 10.82 | 11.53 | 3.12E-74  | 3.29E-14 | 5.11E-15 | 3.02E-14 | 5.11E-15 | 5.11E-15 | 9.23E-07 |
| 739.33842 | 64.58  | 13.82 | 15.81 | 11.74 | 12.42 | 9.28E-85  | 5.11E-15 | 5.11E-15 | 3.57E-14 | 5.11E-15 | 5.11E-15 | 4.87E-06 |
| 739.45635 | 219.61 | 14.14 | 15.11 | 15.28 | 13.76 | 3.27E-05  | 2.78E-02 | 6.04E-03 | 7.00E-01 | 9.68E-01 | 1.47E-03 | 2.31E-04 |
| 739.49344 | 290.98 | 14.39 | 15.76 | 15.90 | 14.96 | 9.86E-06  | 2.45E-04 | 3.08E-05 | 3.23E-01 | 9.72E-01 | 1.01E-01 | 3.25E-02 |
| 739.51255 | 259.07 | 20.65 | 19.26 | 20.22 | 19.52 | 5.08E-07  | 1.38E-06 | 3.44E-01 | 1.79E-04 | 2.09E-03 | 7.94E-01 | 4.88E-02 |
| 739.68796 | 49.27  | 12.74 | 11.87 | 11.67 | 12.23 | 1.13E-07  | 2.74E-05 | 1.18E-07 | 3.85E-02 | 7.17E-01 | 2.58E-01 | 2.23E-02 |
| 739.69863 | 56.28  | 13.69 | 12.63 | 13.57 | 13.68 | 1.91E-23  | 4.02E-14 | 6.42E-01 | 1.00E+00 | 4.29E-14 | 4.37E-14 | 7.18E-01 |
| 739.75807 | 49.51  | 11.26 | 12.76 | 12.61 | 12.80 | 5.31E-09  | 2.93E-07 | 3.83E-06 | 3.02E-07 | 9.44E-01 | 9.99E-01 | 9.04E-01 |
| 739.84983 | 47.89  | 10.75 | 11.43 | 12.15 | 11.62 | 2.92E-04  | 1.46E-01 | 8.17E-05 | 4.00E-02 | 1.19E-01 | 9.38E-01 | 3.88E-01 |
| 739.85657 | 52.75  | 12.18 | 12.50 | 12.58 | 12.71 | 2.97E-01  | 6.62E-01 | 4.73E-01 | 2.66E-01 | 9.92E-01 | 9.02E-01 | 9.75E-01 |
| 740.33382 | 64.62  | 11.30 | 13.65 | 9.87  | 10.18 | 1.67E-63  | 5.11E-15 | 4.32E-14 | 5.18E-10 | 5.11E-15 | 5.11E-15 | 2.58E-01 |
| 740.52255 | 283.79 | 18.92 | 19.20 | 18.82 | 19.84 | 2.64E-04  | 6.40E-01 | 9.76E-01 | 1.05E-03 | 4.04E-01 | 5.08E-02 | 3.05E-04 |
| 740.62282 | 64.09  | 12.15 | 10.66 | 11.52 | 11.90 | 2.12E-07  | 1.17E-07 | 6.29E-02 | 7.65E-01 | 6.41E-03 | 4.57E-05 | 4.93E-01 |
| 740.65257 | 66.11  | 12.44 | 9.62  | 12.63 | 12.40 | 1.04E-27  | 2.62E-14 | 8.82E-01 | 9.98E-01 | 1.40E-14 | 4.07E-14 | 8.27E-01 |
| 740.69106 | 55.61  | 18.00 | 18.49 | 19.27 | 19.01 | 1.05E-30  | 3.70E-06 | 5.11E-15 | 4.25E-14 | 7.83E-13 | 4.84E-06 | 4.90E-02 |
| 740.73656 | 49.49  | 12.87 | 12.07 | 12.45 | 12.75 | 1.83E-03  | 1.43E-03 | 2.16E-01 | 9.49E-01 | 2.92E-01 | 1.57E-02 | 5.61E-01 |
| 740.82206 | 42     | 14.56 | 16.46 | 15.89 | 16.59 | 8.59E-12  | 1.16E-09 | 2.61E-05 | 2.69E-10 | 2.01E-01 | 9.76E-01 | 9.16E-02 |
| 741.09677 | 63.68  | 12.76 | 15.42 | 10.30 | 11.47 | 2.33E-58  | 8.88E-15 | 2.38E-14 | 2.79E-07 | 5.11E-15 | 5.11E-15 | 7.06E-06 |
| 741.4722  | 233.09 | 19.35 | 19.99 | 19.95 | 18.88 | 3.73E-10  | 1.03E-03 | 2.15E-03 | 3.85E-02 | 9.96E-01 | 1.44E-08 | 3.63E-08 |

|           |        |       |       |       |       |           |          |          |          |          |          |          |
|-----------|--------|-------|-------|-------|-------|-----------|----------|----------|----------|----------|----------|----------|
| 741.50556 | 286.85 | 11.99 | 15.40 | 14.96 | 14.58 | 5.44E-15  | 1.43E-13 | 5.05E-11 | 2.93E-08 | 7.16E-01 | 2.42E-01 | 8.26E-01 |
| 741.52353 | 290.7  | 17.95 | 17.50 | 16.82 | 17.49 | 1.10E-02  | 5.32E-01 | 4.28E-03 | 5.33E-01 | 1.96E-01 | 1.00E+00 | 2.28E-01 |
| 741.70608 | 53.77  | 12.27 | 12.74 | 12.79 | 13.07 | 4.51E-02  | 3.31E-01 | 2.30E-01 | 2.76E-02 | 9.97E-01 | 6.72E-01 | 7.77E-01 |
| 741.71419 | 46.62  | 13.05 | 12.66 | 12.80 | 13.02 | 5.42E-02  | 7.10E-02 | 3.92E-01 | 9.99E-01 | 8.22E-01 | 1.31E-01 | 5.28E-01 |
| 741.85245 | 45.26  | 11.79 | 9.01  | 11.80 | 11.89 | 9.13E-08  | 2.48E-06 | 1.00E+00 | 9.98E-01 | 3.49E-06 | 3.81E-06 | 9.99E-01 |
| 742.09959 | 63.75  | 12.76 | 12.84 | 10.47 | 11.09 | 1.45E-43  | 9.66E-01 | 5.11E-15 | 3.91E-14 | 5.11E-15 | 3.62E-14 | 1.20E-03 |
| 742.46584 | 231.58 | 13.73 | 14.05 | 13.86 | 13.60 | 4.11E-01  | 6.17E-01 | 9.58E-01 | 9.62E-01 | 8.96E-01 | 3.65E-01 | 7.73E-01 |
| 742.48359 | 290.91 | 16.79 | 16.36 | 17.17 | 16.68 | 6.29E-01  | 8.92E-01 | 9.20E-01 | 9.98E-01 | 5.53E-01 | 9.59E-01 | 8.63E-01 |
| 742.51466 | 290.75 | 11.44 | 14.52 | 14.57 | 13.42 | 2.27E-10  | 1.06E-08 | 3.94E-09 | 6.22E-04 | 9.99E-01 | 1.50E-01 | 1.13E-01 |
| 742.54079 | 288.35 | 19.00 | 17.04 | 17.05 | 17.24 | 1.61E-11  | 2.62E-09 | 1.96E-09 | 2.04E-07 | 1.00E+00 | 9.23E-01 | 9.24E-01 |
| 742.64692 | 62.14  | 14.58 | 12.41 | 16.16 | 15.45 | 4.46E-28  | 5.06E-12 | 4.74E-07 | 1.89E-02 | 5.11E-15 | 4.24E-14 | 8.46E-02 |
| 742.68952 | 57.6   | 15.07 | 14.32 | 16.15 | 15.86 | 1.55E-22  | 7.75E-05 | 2.53E-09 | 4.06E-05 | 3.42E-14 | 4.80E-14 | 3.40E-01 |
| 742.7061  | 53.85  | 14.15 | 15.36 | 15.75 | 15.37 | 1.65E-21  | 4.21E-13 | 3.66E-14 | 1.23E-12 | 6.71E-02 | 1.00E+00 | 8.16E-02 |
| 742.78464 | 39.14  | 16.51 | 19.90 | 19.71 | 19.67 | 4.79E-33  | 5.33E-15 | 7.11E-15 | 1.44E-14 | 8.97E-01 | 8.34E-01 | 9.98E-01 |
| 743.09357 | 64.18  | 11.40 | 12.69 | 9.77  | 10.23 | 3.27E-39  | 1.10E-10 | 4.25E-14 | 1.17E-08 | 5.11E-15 | 5.11E-15 | 7.57E-02 |
| 743.48851 | 261.68 | 24.14 | 25.60 | 25.53 | 25.18 | 2.63E-12  | 7.88E-11 | 4.36E-10 | 8.73E-06 | 9.85E-01 | 2.08E-01 | 3.63E-01 |
| 743.6853  | 58.1   | 12.38 | 9.35  | 12.51 | 11.02 | 8.40E-17  | 8.28E-14 | 9.85E-01 | 1.67E-03 | 5.66E-14 | 1.15E-04 | 6.29E-04 |
| 743.71008 | 54.37  | 12.74 | 12.82 | 13.26 | 13.11 | 3.81E-01  | 9.96E-01 | 4.00E-01 | 7.04E-01 | 5.69E-01 | 8.42E-01 | 9.74E-01 |
| 743.75163 | 46.92  | 12.24 | 13.82 | 13.35 | 13.69 | 2.89E-14  | 6.14E-13 | 3.03E-07 | 9.03E-11 | 9.82E-02 | 9.28E-01 | 3.59E-01 |
| 743.76018 | 40.53  | 12.06 | 13.20 | 13.01 | 13.49 | 5.73E-10  | 6.76E-07 | 4.52E-05 | 1.19E-09 | 7.91E-01 | 5.68E-01 | 1.25E-01 |
| 743.78835 | 45.44  | 13.85 | 14.92 | 14.52 | 14.66 | 3.50E-09  | 1.93E-09 | 2.70E-04 | 1.30E-05 | 7.56E-02 | 4.30E-01 | 8.37E-01 |
| 744.0262  | 25.27  | 14.20 | 12.17 | 12.12 | 12.53 | 9.51E-10  | 5.54E-08 | 1.95E-08 | 2.01E-05 | 9.99E-01 | 7.35E-01 | 6.49E-01 |
| 744.04988 | 17.46  | 11.28 | 11.99 | 11.65 | 11.42 | 3.40E-02  | 2.46E-02 | 4.51E-01 | 9.52E-01 | 5.29E-01 | 1.30E-01 | 8.13E-01 |
| 744.45753 | 217.11 | 14.23 | 16.16 | 12.75 | 13.20 | 3.33E-47  | 3.69E-14 | 1.86E-13 | 6.10E-07 | 5.11E-15 | 5.11E-15 | 9.21E-02 |
| 744.49193 | 262.1  | 23.18 | 24.27 | 24.22 | 23.87 | 4.78E-08  | 3.56E-07 | 8.54E-07 | 3.21E-03 | 9.96E-01 | 2.22E-01 | 3.14E-01 |
| 744.64474 | 61.57  | 14.16 | 12.00 | 15.20 | 14.64 | 9.84E-25  | 3.34E-13 | 6.34E-04 | 2.87E-01 | 1.04E-14 | 4.29E-14 | 1.96E-01 |
| 744.68071 | 58.62  | 13.67 | 11.36 | 12.43 | 12.87 | 2.85E-15  | 4.37E-14 | 9.28E-06 | 1.20E-02 | 2.77E-04 | 3.04E-07 | 3.56E-01 |
| 744.72197 | 48.8   | 17.19 | 18.46 | 18.13 | 18.00 | 2.34E-29  | 5.11E-15 | 4.11E-14 | 1.04E-13 | 5.45E-03 | 6.78E-05 | 5.82E-01 |
| 744.74363 | 48.03  | 11.62 | 12.37 | 12.79 | 12.85 | 4.48E-06  | 1.72E-02 | 3.15E-05 | 2.25E-05 | 3.71E-01 | 2.78E-01 | 9.96E-01 |
| 744.75438 | 40.82  | 12.84 | 12.98 | 12.75 | 13.12 | 9.50E-02  | 7.91E-01 | 9.27E-01 | 2.55E-01 | 4.36E-01 | 7.96E-01 | 8.13E-02 |
| 744.78171 | 45.24  | 15.69 | 18.16 | 17.99 | 18.04 | 1.76E-33  | 5.11E-15 | 7.33E-15 | 9.10E-15 | 8.20E-01 | 9.31E-01 | 9.95E-01 |
| 744.89101 | 62.67  | 9.64  | 13.31 | 8.85  | 9.21  | 2.90E-146 | 5.11E-15 | 2.20E-14 | 7.82E-08 | 5.11E-15 | 5.11E-15 | 1.59E-05 |
| 745.47227 | 277.83 | 18.82 | 18.88 | 17.40 | 18.44 | 4.04E-05  | 9.97E-01 | 1.53E-04 | 6.95E-01 | 1.14E-04 | 5.94E-01 | 1.60E-02 |
| 745.48698 | 272.3  | 21.88 | 18.97 | 18.19 | 22.19 | 4.27E-08  | 8.04E-04 | 8.18E-06 | 9.77E-01 | 7.37E-01 | 3.82E-04 | 4.36E-06 |
| 745.50348 | 273.87 | 30.83 | 31.21 | 31.22 | 30.79 | 1.04E-04  | 6.53E-03 | 4.85E-03 | 9.94E-01 | 1.00E+00 | 4.91E-03 | 3.69E-03 |
| 745.72638 | 44.19  | 12.78 | 13.08 | 13.04 | 13.37 | 9.96E-03  | 2.73E-01 | 4.19E-01 | 3.76E-03 | 9.92E-01 | 3.58E-01 | 2.19E-01 |
| 745.75373 | 46.84  | 12.03 | 12.48 | 12.44 | 13.02 | 1.57E-02  | 4.27E-01 | 4.97E-01 | 6.18E-03 | 9.99E-01 | 2.91E-01 | 2.29E-01 |
| 746.4903  | 277.72 | 20.94 | 19.11 | 18.92 | 21.23 | 4.17E-07  | 9.54E-04 | 1.73E-04 | 9.34E-01 | 9.80E-01 | 2.20E-04 | 3.86E-05 |
| 746.50748 | 271.84 | 29.60 | 30.03 | 29.92 | 29.51 | 2.78E-05  | 1.50E-03 | 2.80E-02 | 8.83E-01 | 7.98E-01 | 2.00E-04 | 4.80E-03 |
| 746.65636 | 68.47  | 13.19 | 10.41 | 11.80 | 12.01 | 1.19E-27  | 5.11E-15 | 6.80E-10 | 4.65E-07 | 2.64E-09 | 3.68E-11 | 7.72E-01 |
| 746.72209 | 53.89  | 13.78 | 12.82 | 12.22 | 13.12 | 4.59E-08  | 8.64E-04 | 8.20E-09 | 5.36E-02 | 8.71E-02 | 6.50E-01 | 3.35E-03 |
| 746.73859 | 48.88  | 17.30 | 19.25 | 19.13 | 18.96 | 8.42E-50  | 5.11E-15 | 5.11E-15 | 5.11E-15 | 7.36E-01 | 6.37E-02 | 4.29E-01 |
| 746.76867 | 45.78  | 12.13 | 12.44 | 12.25 | 12.64 | 3.63E-01  | 7.24E-01 | 9.76E-01 | 3.27E-01 | 9.26E-01 | 9.11E-01 | 5.80E-01 |
| 746.79318 | 40.29  | 12.40 | 12.45 | 12.48 | 13.01 | 2.45E-02  | 9.94E-01 | 9.81E-01 | 2.59E-02 | 1.00E+00 | 6.20E-02 | 7.65E-02 |
| 747.10048 | 64.39  | 11.86 | 13.07 | 9.90  | 10.69 | 1.30E-27  | 1.13E-05 | 4.93E-13 | 3.72E-05 | 5.33E-15 | 4.32E-14 | 1.45E-02 |

|           |        |       |       |       |       |           |          |          |          |          |          |          |
|-----------|--------|-------|-------|-------|-------|-----------|----------|----------|----------|----------|----------|----------|
| 747.51112 | 272.27 | 27.99 | 28.03 | 27.99 | 27.75 | 2.62E-01  | 9.91E-01 | 1.00E+00 | 3.87E-01 | 9.94E-01 | 2.64E-01 | 3.86E-01 |
| 747.56638 | 220.81 | 19.70 | 18.40 | 18.26 | 18.41 | 1.83E-06  | 9.56E-05 | 9.30E-06 | 1.69E-04 | 9.65E-01 | 1.00E+00 | 9.62E-01 |
| 747.74172 | 49.87  | 12.43 | 13.03 | 12.85 | 13.14 | 1.32E-02  | 4.29E-02 | 2.36E-01 | 1.33E-02 | 8.72E-01 | 9.67E-01 | 6.20E-01 |
| 747.77644 | 44.5   | 12.95 | 12.80 | 12.46 | 12.34 | 2.43E-01  | 9.64E-01 | 4.43E-01 | 2.69E-01 | 7.58E-01 | 5.54E-01 | 9.83E-01 |
| 748.52019 | 264.69 | 25.54 | 25.11 | 25.35 | 24.90 | 3.36E-03  | 7.06E-02 | 6.79E-01 | 2.43E-03 | 5.52E-01 | 6.58E-01 | 7.14E-02 |
| 748.56321 | 219.4  | 20.92 | 17.20 | 16.88 | 17.27 | 4.92E-49  | 5.11E-15 | 5.11E-15 | 5.11E-15 | 5.18E-01 | 9.93E-01 | 3.72E-01 |
| 748.67648 | 63.09  | 14.50 | 11.65 | 15.23 | 14.66 | 2.49E-38  | 5.33E-15 | 8.52E-03 | 9.16E-01 | 5.11E-15 | 5.33E-15 | 8.09E-02 |
| 748.73599 | 47.19  | 14.52 | 15.32 | 15.15 | 15.23 | 2.24E-34  | 5.11E-15 | 2.71E-14 | 7.77E-15 | 2.11E-02 | 4.30E-01 | 5.62E-01 |
| 748.74421 | 42.93  | 14.02 | 13.84 | 13.75 | 13.99 | 3.69E-01  | 7.40E-01 | 3.81E-01 | 9.98E-01 | 9.45E-01 | 8.55E-01 | 5.33E-01 |
| 748.81323 | 41.97  | 14.08 | 15.49 | 15.23 | 15.94 | 2.57E-05  | 1.39E-03 | 1.30E-02 | 1.84E-05 | 9.05E-01 | 6.77E-01 | 2.79E-01 |
| 749.06889 | 22.54  | 12.32 | 10.94 | 10.53 | 10.97 | 1.98E-03  | 2.63E-02 | 1.53E-03 | 3.79E-02 | 8.42E-01 | 1.00E+00 | 8.23E-01 |
| 749.52215 | 265.66 | 22.74 | 22.25 | 22.47 | 22.09 | 3.21E-02  | 1.26E-01 | 6.09E-01 | 2.65E-02 | 7.70E-01 | 9.12E-01 | 3.77E-01 |
| 749.56561 | 213.59 | 19.69 | 13.30 | 12.26 | 13.71 | 3.80E-46  | 5.11E-15 | 5.11E-15 | 5.11E-15 | 8.76E-02 | 8.00E-01 | 7.97E-03 |
| 749.69377 | 55.69  | 12.43 | 12.52 | 13.18 | 13.05 | 1.23E-05  | 9.50E-01 | 1.00E-04 | 2.94E-03 | 1.33E-03 | 2.05E-02 | 8.92E-01 |
| 750.53707 | 275.46 | 20.66 | 18.77 | 18.35 | 18.80 | 7.62E-09  | 6.91E-06 | 1.93E-08 | 1.68E-05 | 6.96E-01 | 1.00E+00 | 6.72E-01 |
| 750.56704 | 254.82 | 19.71 | 18.05 | 17.66 | 19.13 | 1.94E-18  | 1.39E-11 | 4.40E-14 | 5.84E-02 | 3.26E-01 | 4.42E-05 | 1.04E-08 |
| 750.66712 | 62.6   | 13.09 | 10.55 | 12.32 | 12.48 | 2.78E-22  | 2.09E-14 | 3.64E-03 | 4.43E-02 | 3.53E-12 | 2.82E-13 | 9.01E-01 |
| 750.69611 | 55.73  | 12.63 | 13.49 | 14.35 | 14.13 | 7.78E-12  | 1.93E-03 | 2.88E-11 | 1.93E-08 | 2.77E-03 | 5.46E-02 | 8.19E-01 |
| 750.74541 | 47.45  | 13.84 | 13.75 | 13.40 | 14.18 | 1.56E-01  | 9.93E-01 | 5.14E-01 | 7.39E-01 | 7.06E-01 | 5.98E-01 | 1.00E-01 |
| 750.77183 | 49.02  | 16.15 | 17.85 | 18.23 | 18.12 | 4.14E-35  | 2.29E-14 | 5.11E-15 | 5.33E-15 | 7.68E-02 | 3.59E-01 | 8.95E-01 |
| 750.88834 | 54.48  | 13.35 | 14.37 | 11.34 | 12.24 | 1.66E-56  | 2.11E-11 | 5.11E-15 | 1.21E-12 | 5.11E-15 | 5.11E-15 | 1.56E-08 |
| 750.8966  | 61.44  | 13.30 | 15.71 | 11.20 | 12.02 | 1.97E-99  | 5.11E-15 | 5.11E-15 | 3.33E-14 | 5.11E-15 | 5.11E-15 | 9.33E-10 |
| 751.56847 | 256.98 | 18.56 | 16.81 | 16.35 | 18.73 | 1.66E-23  | 3.06E-11 | 4.31E-14 | 8.98E-01 | 2.48E-01 | 5.09E-12 | 4.19E-14 |
| 751.69249 | 56.44  | 11.81 | 11.81 | 13.77 | 13.20 | 1.38E-10  | 1.00E+00 | 1.97E-08 | 2.09E-04 | 4.91E-08 | 3.21E-04 | 3.25E-01 |
| 751.73928 | 47.42  | 12.30 | 14.00 | 13.61 | 13.80 | 2.87E-12  | 2.90E-11 | 2.64E-07 | 1.07E-08 | 3.48E-01 | 8.43E-01 | 8.60E-01 |
| 751.7476  | 41.02  | 12.96 | 12.83 | 13.05 | 13.51 | 1.21E-02  | 9.19E-01 | 9.65E-01 | 4.10E-02 | 6.99E-01 | 8.54E-03 | 1.36E-01 |
| 752.43788 | 189.54 | 7.99  | 13.20 | 15.01 | 7.00  | 2.53E-41  | 4.22E-14 | 5.11E-15 | 2.53E-01 | 4.47E-03 | 2.20E-14 | 5.11E-15 |
| 752.52563 | 204.56 | 12.90 | 13.97 | 13.46 | 14.04 | 4.12E-04  | 1.78E-03 | 2.19E-01 | 1.03E-03 | 3.18E-01 | 9.95E-01 | 2.26E-01 |
| 752.54767 | 286.79 | 16.66 | 16.62 | 16.74 | 16.79 | 9.45E-01  | 9.99E-01 | 9.93E-01 | 9.71E-01 | 9.79E-01 | 9.44E-01 | 9.98E-01 |
| 752.56012 | 285.38 | 16.59 | 15.23 | 14.90 | 15.05 | 1.77E-11  | 4.43E-07 | 2.42E-10 | 2.51E-08 | 5.69E-01 | 9.06E-01 | 9.38E-01 |
| 752.66678 | 60.36  | 12.41 | 10.74 | 12.19 | 12.21 | 1.70E-10  | 8.28E-10 | 8.12E-01 | 8.70E-01 | 1.84E-07 | 3.04E-07 | 1.00E+00 |
| 752.70765 | 55.52  | 16.55 | 16.22 | 16.96 | 16.94 | 2.25E-11  | 1.10E-02 | 1.06E-03 | 2.54E-03 | 7.87E-10 | 4.98E-09 | 1.00E+00 |
| 752.73445 | 52.31  | 15.71 | 17.01 | 17.58 | 17.42 | 4.65E-32  | 4.29E-14 | 5.11E-15 | 1.02E-14 | 5.49E-04 | 2.91E-02 | 7.11E-01 |
| 752.7581  | 43.11  | 11.88 | 12.71 | 12.30 | 12.34 | 1.82E-02  | 7.65E-03 | 3.55E-01 | 2.89E-01 | 3.98E-01 | 5.39E-01 | 9.98E-01 |
| 752.7693  | 46.9   | 13.52 | 14.71 | 14.44 | 14.78 | 2.54E-21  | 4.37E-14 | 1.76E-11 | 4.35E-14 | 1.70E-01 | 9.39E-01 | 4.96E-02 |
| 752.89973 | 46.98  | 12.41 | 12.70 | 10.33 | 11.25 | 1.96E-37  | 2.76E-01 | 5.11E-15 | 1.22E-10 | 5.11E-15 | 5.37E-14 | 5.44E-07 |
| 753.30639 | 56.55  | 12.41 | 20.46 | 10.51 | 11.04 | 2.43E-107 | 5.11E-15 | 3.12E-12 | 1.30E-06 | 5.11E-15 | 5.11E-15 | 1.82E-01 |
| 753.5095  | 287.9  | 16.10 | 17.87 | 14.35 | 13.42 | 1.99E-24  | 2.49E-05 | 2.26E-05 | 1.84E-10 | 4.26E-14 | 1.98E-14 | 8.45E-02 |
| 753.54741 | 287.45 | 13.06 | 16.07 | 16.15 | 16.99 | 2.43E-19  | 4.88E-12 | 8.83E-13 | 4.27E-14 | 9.97E-01 | 1.29E-01 | 1.88E-01 |
| 753.73483 | 51.07  | 13.20 | 12.78 | 12.96 | 13.16 | 5.59E-02  | 5.87E-02 | 4.49E-01 | 9.95E-01 | 7.29E-01 | 1.39E-01 | 6.51E-01 |
| 753.80569 | 36.64  | 12.29 | 12.42 | 12.59 | 11.92 | 3.23E-01  | 9.84E-01 | 8.25E-01 | 7.26E-01 | 9.63E-01 | 5.31E-01 | 2.60E-01 |
| 754.30674 | 56.7   | 13.20 | 19.79 | 11.04 | 11.76 | 8.42E-121 | 5.11E-15 | 8.88E-15 | 3.36E-12 | 5.11E-15 | 5.11E-15 | 1.40E-03 |
| 754.50775 | 293.97 | 12.34 | 14.22 | 12.39 | 10.99 | 1.10E-06  | 2.84E-03 | 1.00E+00 | 6.82E-02 | 4.94E-03 | 1.82E-07 | 6.13E-02 |
| 754.66663 | 56.52  | 17.85 | 18.12 | 19.25 | 18.93 | 1.82E-22  | 2.13E-01 | 4.14E-14 | 3.17E-12 | 2.99E-13 | 3.34E-07 | 1.23E-01 |
| 754.68973 | 60.75  | 12.96 | 12.24 | 13.69 | 13.53 | 1.36E-04  | 1.34E-01 | 1.24E-01 | 3.39E-01 | 1.66E-04 | 1.59E-03 | 9.70E-01 |



|           |        |       |       |       |       |          |          |          |          |          |          |          |
|-----------|--------|-------|-------|-------|-------|----------|----------|----------|----------|----------|----------|----------|
| 754.71019 | 55.29  | 15.57 | 14.97 | 15.89 | 15.81 | 4.12E-09 | 2.42E-04 | 1.13E-01 | 3.51E-01 | 1.05E-08 | 4.34E-07 | 9.57E-01 |
| 754.71906 | 46.38  | 12.99 | 12.68 | 13.43 | 13.58 | 2.96E-03 | 6.07E-01 | 2.97E-01 | 1.05E-01 | 2.04E-02 | 4.56E-03 | 9.39E-01 |
| 754.72723 | 46.26  | 14.08 | 14.35 | 15.20 | 14.95 | 3.06E-11 | 3.31E-01 | 2.50E-10 | 2.47E-06 | 4.62E-06 | 3.43E-03 | 4.64E-01 |
| 754.73554 | 51.31  | 13.99 | 14.08 | 14.48 | 14.50 | 6.96E-02 | 9.77E-01 | 1.49E-01 | 1.55E-01 | 3.47E-01 | 3.47E-01 | 1.00E+00 |
| 754.75779 | 44.67  | 12.90 | 13.17 | 13.00 | 13.51 | 5.92E-02 | 6.29E-01 | 9.75E-01 | 4.61E-02 | 8.71E-01 | 4.92E-01 | 1.35E-01 |
| 755.2927  | 64.52  | 12.82 | 16.08 | 10.77 | 11.38 | 1.57E-87 | 5.11E-15 | 5.33E-15 | 4.95E-14 | 5.11E-15 | 5.11E-15 | 2.47E-03 |
| 755.31218 | 56.93  | 13.73 | 15.21 | 11.87 | 12.61 | 1.06E-59 | 4.12E-14 | 5.11E-15 | 7.50E-12 | 5.11E-15 | 5.11E-15 | 1.05E-05 |
| 755.48764 | 269.36 | 16.20 | 16.12 | 15.65 | 16.59 | 6.16E-02 | 9.96E-01 | 3.34E-01 | 6.49E-01 | 4.93E-01 | 5.31E-01 | 3.33E-02 |
| 755.67135 | 58.87  | 13.04 | 11.53 | 12.59 | 12.73 | 2.35E-09 | 1.11E-09 | 1.90E-01 | 5.35E-01 | 4.03E-05 | 6.02E-06 | 9.39E-01 |
| 755.75384 | 46.29  | 12.08 | 12.96 | 12.62 | 12.52 | 7.10E-02 | 4.06E-02 | 3.49E-01 | 5.62E-01 | 7.47E-01 | 5.89E-01 | 9.91E-01 |
| 755.83025 | 49.67  | 10.99 | 11.13 | 12.11 | 11.96 | 2.86E-03 | 9.78E-01 | 9.22E-03 | 4.23E-02 | 3.85E-02 | 1.27E-01 | 9.78E-01 |
| 756.15486 | 23.18  | 15.37 | 15.53 | 14.74 | 13.88 | 8.97E-03 | 9.88E-01 | 5.88E-01 | 2.09E-02 | 4.14E-01 | 1.05E-02 | 3.50E-01 |
| 756.30494 | 64.71  | 13.60 | 14.96 | 11.70 | 12.42 | 2.33E-56 | 4.26E-14 | 5.11E-15 | 2.06E-12 | 5.11E-15 | 5.11E-15 | 5.18E-05 |
| 756.4912  | 254.03 | 15.43 | 15.59 | 14.93 | 14.61 | 6.35E-02 | 9.72E-01 | 5.70E-01 | 1.68E-01 | 3.36E-01 | 7.59E-02 | 8.53E-01 |
| 756.66478 | 56.58  | 16.94 | 17.25 | 18.40 | 18.07 | 2.32E-19 | 1.87E-01 | 4.19E-14 | 1.42E-10 | 4.56E-11 | 8.92E-06 | 1.66E-01 |
| 756.79768 | 44.7   | 15.40 | 17.55 | 17.38 | 17.56 | 1.44E-25 | 3.71E-14 | 4.37E-14 | 4.11E-14 | 8.43E-01 | 1.00E+00 | 8.41E-01 |
| 756.81852 | 44.05  | 12.40 | 13.98 | 13.48 | 13.73 | 5.13E-08 | 8.00E-08 | 3.51E-04 | 1.35E-05 | 2.69E-01 | 8.19E-01 | 8.10E-01 |
| 757.50197 | 267.81 | 20.32 | 19.54 | 20.96 | 20.14 | 2.38E-07 | 4.21E-03 | 2.78E-02 | 8.66E-01 | 3.32E-08 | 6.52E-02 | 4.19E-03 |
| 757.67984 | 57.04  | 12.53 | 12.18 | 12.31 | 12.71 | 1.81E-01 | 4.77E-01 | 8.04E-01 | 8.92E-01 | 9.51E-01 | 1.71E-01 | 4.08E-01 |
| 757.82265 | 46.45  | 11.65 | 8.90  | 12.00 | 12.04 | 8.65E-12 | 2.57E-08 | 8.57E-01 | 8.28E-01 | 7.09E-10 | 1.52E-09 | 1.00E+00 |
| 757.83218 | 53.07  | 12.69 | 9.44  | 12.66 | 13.01 | 2.06E-16 | 9.36E-13 | 1.00E+00 | 8.81E-01 | 3.82E-12 | 1.72E-13 | 8.54E-01 |
| 758.50321 | 255.38 | 19.70 | 18.34 | 19.13 | 18.71 | 1.31E-10 | 7.19E-11 | 1.43E-02 | 4.93E-06 | 3.77E-04 | 2.52E-01 | 1.55E-01 |
| 758.66201 | 50.06  | 14.02 | 11.62 | 12.72 | 13.01 | 4.99E-19 | 3.84E-14 | 2.08E-07 | 1.51E-04 | 2.18E-05 | 1.49E-07 | 6.28E-01 |
| 758.68006 | 56.85  | 13.29 | 12.08 | 13.09 | 13.09 | 1.15E-09 | 1.98E-09 | 6.81E-01 | 6.91E-01 | 1.19E-06 | 3.08E-06 | 1.00E+00 |
| 758.75852 | 46.78  | 17.40 | 20.25 | 20.15 | 20.04 | 1.38E-40 | 5.11E-15 | 5.11E-15 | 5.11E-15 | 9.63E-01 | 7.37E-01 | 9.43E-01 |
| 759.51036 | 292.92 | 21.46 | 20.01 | 20.76 | 20.43 | 5.82E-05 | 2.27E-05 | 1.05E-01 | 6.92E-03 | 7.52E-02 | 5.53E-01 | 7.27E-01 |
| 759.57879 | 255.96 | 17.14 | 16.91 | 17.21 | 17.66 | 2.24E-01 | 9.03E-01 | 9.97E-01 | 4.55E-01 | 8.22E-01 | 1.62E-01 | 5.93E-01 |
| 759.68087 | 57.2   | 12.66 | 10.91 | 13.87 | 12.83 | 1.50E-11 | 2.69E-05 | 6.66E-03 | 9.70E-01 | 1.63E-12 | 1.14E-05 | 4.11E-02 |
| 759.7259  | 48.72  | 12.07 | 14.74 | 14.32 | 14.51 | 1.44E-29 | 6.22E-15 | 4.00E-14 | 3.15E-14 | 2.40E-01 | 7.53E-01 | 8.40E-01 |
| 759.76097 | 46.18  | 13.84 | 14.29 | 14.07 | 14.36 | 7.94E-03 | 2.85E-02 | 4.73E-01 | 1.02E-02 | 5.39E-01 | 9.77E-01 | 3.18E-01 |
| 759.76914 | 40.37  | 12.91 | 13.25 | 13.15 | 13.64 | 8.97E-03 | 3.52E-01 | 6.44E-01 | 3.67E-03 | 9.64E-01 | 2.79E-01 | 1.07E-01 |
| 760.51707 | 266.54 | 20.56 | 19.42 | 19.90 | 20.26 | 2.15E-05 | 9.91E-06 | 2.43E-02 | 5.94E-01 | 1.72E-01 | 3.75E-03 | 4.55E-01 |
| 760.55125 | 196.78 | 14.58 | 14.09 | 14.09 | 13.65 | 9.32E-03 | 2.50E-01 | 2.42E-01 | 3.56E-03 | 1.00E+00 | 3.76E-01 | 3.68E-01 |
| 760.58232 | 256.86 | 14.89 | 14.14 | 14.33 | 15.44 | 1.14E-02 | 2.48E-01 | 5.01E-01 | 5.32E-01 | 9.67E-01 | 1.25E-02 | 4.26E-02 |
| 760.68658 | 48.09  | 13.86 | 13.78 | 13.81 | 13.76 | 9.61E-01 | 9.80E-01 | 9.95E-01 | 9.55E-01 | 9.99E-01 | 9.99E-01 | 9.93E-01 |
| 760.69622 | 53.89  | 17.18 | 17.78 | 17.91 | 17.71 | 3.80E-11 | 1.47E-07 | 7.17E-11 | 8.44E-06 | 5.76E-01 | 9.11E-01 | 2.24E-01 |
| 760.72976 | 43.14  | 12.09 | 13.02 | 12.86 | 13.08 | 2.19E-05 | 2.02E-04 | 2.80E-03 | 9.43E-05 | 8.92E-01 | 9.92E-01 | 7.60E-01 |
| 760.75589 | 46.99  | 16.36 | 18.68 | 18.63 | 18.56 | 1.58E-40 | 5.11E-15 | 5.11E-15 | 5.11E-15 | 9.86E-01 | 8.88E-01 | 9.80E-01 |
| 761.47967 | 288.61 | 15.29 | 16.38 | 15.32 | 16.62 | 7.08E-07 | 8.67E-04 | 1.00E+00 | 4.13E-05 | 1.68E-03 | 8.43E-01 | 9.22E-05 |
| 761.52755 | 292.44 | 16.97 | 16.83 | 15.55 | 17.35 | 4.88E-06 | 9.76E-01 | 2.16E-04 | 6.99E-01 | 1.64E-03 | 4.71E-01 | 5.43E-06 |
| 761.53887 | 288.72 | 15.25 | 16.99 | 16.23 | 16.86 | 2.37E-10 | 1.49E-09 | 1.09E-03 | 5.67E-08 | 2.68E-02 | 9.63E-01 | 1.10E-01 |
| 761.59654 | 286.75 | 17.72 | 16.83 | 16.99 | 18.47 | 1.68E-04 | 8.88E-02 | 2.07E-01 | 2.16E-01 | 9.77E-01 | 3.14E-04 | 1.26E-03 |
| 761.6998  | 54.14  | 13.26 | 13.23 | 13.25 | 12.75 | 2.49E-02 | 9.97E-01 | 1.00E+00 | 3.48E-02 | 9.99E-01 | 6.82E-02 | 4.87E-02 |
| 761.72794 | 49.65  | 11.80 | 13.15 | 13.03 | 12.94 | 4.60E-09 | 5.59E-08 | 6.40E-07 | 1.01E-05 | 9.55E-01 | 8.18E-01 | 9.82E-01 |
| 761.76201 | 46.4   | 11.14 | 12.81 | 12.70 | 13.04 | 1.26E-05 | 3.10E-04 | 7.87E-04 | 4.90E-05 | 9.93E-01 | 9.51E-01 | 8.53E-01 |

|           |        |       |       |       |       |           |          |          |          |          |          |          |
|-----------|--------|-------|-------|-------|-------|-----------|----------|----------|----------|----------|----------|----------|
| 762.50826 | 264.12 | 22.99 | 23.28 | 22.61 | 22.38 | 3.79E-02  | 7.96E-01 | 6.14E-01 | 2.38E-01 | 1.62E-01 | 3.72E-02 | 9.00E-01 |
| 762.53141 | 236.53 | 17.64 | 16.53 | 16.65 | 16.32 | 6.56E-04  | 5.98E-03 | 1.63E-02 | 9.95E-04 | 9.86E-01 | 9.38E-01 | 7.97E-01 |
| 762.59821 | 280.91 | 16.36 | 15.27 | 15.96 | 17.46 | 2.30E-06  | 2.09E-02 | 6.94E-01 | 2.54E-02 | 2.83E-01 | 5.83E-07 | 9.96E-04 |
| 762.69399 | 57.5   | 14.43 | 13.16 | 13.22 | 13.48 | 1.36E-08  | 1.30E-07 | 4.41E-07 | 2.12E-04 | 9.92E-01 | 4.96E-01 | 6.65E-01 |
| 762.7124  | 52.17  | 17.16 | 18.49 | 18.69 | 18.46 | 1.96E-48  | 5.11E-15 | 5.11E-15 | 5.11E-15 | 1.05E-01 | 9.94E-01 | 6.60E-02 |
| 762.74328 | 46.98  | 12.60 | 12.58 | 12.56 | 13.02 | 2.47E-01  | 1.00E+00 | 9.98E-01 | 3.50E-01 | 1.00E+00 | 3.28E-01 | 2.83E-01 |
| 762.77134 | 40.54  | 11.28 | 13.26 | 13.01 | 13.32 | 2.55E-12  | 6.27E-10 | 5.26E-08 | 5.83E-10 | 8.34E-01 | 9.98E-01 | 7.47E-01 |
| 763.07722 | 64.45  | 13.33 | 13.96 | 11.27 | 12.10 | 3.24E-56  | 1.03E-05 | 5.11E-15 | 4.33E-14 | 5.11E-15 | 5.11E-15 | 2.19E-08 |
| 763.49017 | 284.13 | 13.20 | 16.96 | 15.74 | 15.75 | 2.37E-15  | 4.37E-14 | 2.88E-08 | 7.61E-08 | 2.46E-02 | 3.44E-02 | 1.00E+00 |
| 763.51069 | 268.16 | 22.06 | 22.06 | 21.41 | 20.45 | 4.69E-05  | 1.00E+00 | 2.70E-01 | 1.07E-04 | 2.93E-01 | 1.72E-04 | 5.10E-02 |
| 763.53396 | 220.88 | 16.12 | 15.55 | 15.83 | 15.05 | 7.83E-04  | 1.13E-01 | 6.52E-01 | 3.50E-04 | 7.03E-01 | 2.55E-01 | 2.04E-02 |
| 763.54126 | 214.21 | 15.15 | 14.27 | 14.53 | 14.12 | 4.46E-03  | 1.89E-02 | 1.57E-01 | 4.75E-03 | 8.33E-01 | 9.59E-01 | 5.46E-01 |
| 763.74502 | 47.51  | 12.34 | 12.75 | 12.40 | 12.77 | 4.95E-01  | 6.43E-01 | 9.98E-01 | 6.28E-01 | 7.53E-01 | 1.00E+00 | 7.36E-01 |
| 764.49626 | 280.79 | 12.47 | 15.38 | 14.92 | 14.76 | 2.36E-11  | 1.44E-10 | 5.39E-08 | 1.05E-06 | 6.92E-01 | 4.84E-01 | 9.83E-01 |
| 764.52177 | 261.65 | 21.16 | 20.48 | 20.02 | 20.12 | 4.08E-05  | 3.97E-02 | 5.91E-05 | 5.53E-04 | 2.92E-01 | 5.46E-01 | 9.81E-01 |
| 764.5471  | 243.97 | 18.98 | 17.53 | 17.35 | 17.30 | 3.01E-07  | 8.56E-05 | 5.56E-06 | 5.92E-06 | 9.45E-01 | 8.99E-01 | 9.99E-01 |
| 764.64966 | 66.1   | 12.89 | 10.53 | 13.71 | 12.79 | 1.64E-22  | 6.28E-14 | 1.76E-02 | 9.83E-01 | 2.22E-14 | 2.81E-12 | 9.35E-03 |
| 764.7005  | 42.9   | 13.57 | 13.01 | 13.39 | 13.26 | 2.94E-03  | 1.27E-03 | 6.28E-01 | 1.81E-01 | 6.07E-02 | 3.89E-01 | 8.30E-01 |
| 764.7118  | 51.4   | 14.41 | 14.79 | 14.88 | 14.98 | 1.78E-17  | 9.60E-09 | 1.77E-12 | 4.22E-14 | 5.17E-01 | 1.90E-02 | 3.68E-01 |
| 764.78754 | 42.77  | 14.44 | 16.83 | 15.93 | 16.68 | 3.61E-13  | 6.31E-12 | 2.01E-05 | 2.84E-10 | 2.94E-02 | 9.72E-01 | 1.06E-01 |
| 764.93628 | 57.38  | 12.39 | 12.37 | 10.17 | 11.23 | 1.97E-26  | 1.00E+00 | 1.95E-14 | 1.99E-07 | 3.20E-14 | 7.25E-07 | 4.83E-06 |
| 765.08381 | 22.35  | 10.97 | 13.47 | 11.23 | 11.69 | 4.86E-10  | 9.94E-10 | 8.95E-01 | 2.34E-01 | 8.66E-08 | 6.07E-05 | 6.34E-01 |
| 765.47135 | 226.09 | 18.83 | 19.80 | 19.74 | 18.66 | 1.42E-10  | 3.89E-06 | 1.32E-05 | 8.13E-01 | 9.90E-01 | 2.09E-07 | 7.25E-07 |
| 765.5269  | 260.39 | 19.89 | 18.81 | 18.68 | 18.35 | 1.28E-05  | 3.36E-03 | 6.61E-04 | 1.46E-05 | 9.78E-01 | 4.96E-01 | 7.34E-01 |
| 765.55057 | 232    | 17.49 | 15.74 | 16.46 | 15.53 | 5.63E-09  | 4.73E-07 | 6.28E-03 | 3.42E-08 | 1.14E-01 | 9.22E-01 | 2.60E-02 |
| 765.66909 | 58.16  | 12.55 | 11.02 | 12.42 | 12.42 | 2.57E-09  | 2.13E-08 | 9.58E-01 | 9.61E-01 | 5.09E-07 | 1.30E-06 | 1.00E+00 |
| 766.10755 | 18.07  | 12.96 | 17.03 | 16.68 | 15.43 | 2.25E-22  | 4.01E-14 | 4.37E-14 | 1.89E-08 | 8.15E-01 | 8.05E-04 | 1.36E-02 |
| 766.47505 | 225.66 | 17.00 | 18.39 | 18.30 | 17.07 | 3.71E-11  | 8.67E-08 | 4.37E-07 | 9.92E-01 | 9.84E-01 | 1.61E-06 | 6.92E-06 |
| 766.53997 | 253.94 | 21.12 | 18.82 | 19.01 | 18.49 | 2.25E-16  | 7.00E-12 | 1.82E-10 | 7.04E-14 | 9.32E-01 | 7.15E-01 | 3.52E-01 |
| 766.66807 | 58.23  | 11.34 | 9.86  | 12.81 | 12.07 | 1.15E-17  | 7.49E-06 | 7.30E-06 | 8.27E-02 | 4.30E-14 | 1.40E-10 | 8.32E-02 |
| 766.72847 | 48.3   | 12.95 | 12.55 | 11.93 | 11.88 | 2.68E-03  | 5.94E-01 | 8.72E-03 | 7.39E-03 | 2.44E-01 | 2.04E-01 | 9.99E-01 |
| 766.74719 | 51.18  | 15.77 | 17.02 | 17.52 | 17.44 | 8.57E-34  | 4.24E-14 | 5.11E-15 | 5.33E-15 | 1.10E-03 | 1.17E-02 | 9.40E-01 |
| 766.79915 | 41.51  | 11.04 | 13.67 | 13.05 | 12.76 | 8.01E-10  | 6.06E-10 | 2.34E-06 | 1.35E-04 | 3.92E-01 | 1.18E-01 | 8.93E-01 |
| 766.85915 | 55.52  | 11.66 | 13.27 | 9.88  | 10.49 | 9.31E-63  | 1.82E-14 | 5.33E-15 | 4.26E-13 | 5.11E-15 | 5.11E-15 | 3.23E-04 |
| 766.86781 | 59.87  | 11.77 | 15.26 | 10.05 | 10.75 | 1.09E-73  | 5.11E-15 | 4.29E-14 | 1.80E-06 | 5.11E-15 | 5.11E-15 | 2.60E-03 |
| 766.8764  | 62.24  | 11.54 | 14.95 | 9.92  | 10.47 | 1.01E-100 | 5.11E-15 | 5.77E-15 | 5.38E-13 | 5.11E-15 | 5.11E-15 | 5.34E-04 |
| 767.10995 | 17.35  | 7.66  | 12.54 | 11.94 | 10.10 | 1.65E-15  | 7.18E-14 | 1.15E-11 | 3.14E-04 | 7.38E-01 | 5.17E-04 | 1.44E-02 |
| 767.48771 | 259.19 | 23.42 | 25.14 | 24.77 | 24.31 | 7.84E-14  | 1.42E-13 | 3.34E-09 | 2.79E-04 | 2.93E-01 | 1.20E-03 | 1.63E-01 |
| 767.54328 | 255.43 | 19.95 | 17.66 | 17.64 | 17.40 | 3.81E-12  | 1.01E-08 | 6.11E-09 | 5.25E-10 | 1.00E+00 | 9.09E-01 | 9.17E-01 |
| 767.66761 | 58.35  | 11.22 | 9.86  | 12.25 | 11.39 | 4.47E-06  | 9.66E-03 | 7.67E-02 | 9.82E-01 | 8.27E-07 | 5.01E-03 | 2.23E-01 |
| 767.71476 | 50.89  | 12.97 | 13.02 | 12.87 | 13.26 | 2.83E-01  | 9.95E-01 | 9.58E-01 | 4.60E-01 | 8.83E-01 | 6.34E-01 | 2.24E-01 |
| 768.49128 | 259.66 | 22.16 | 23.93 | 23.46 | 23.12 | 1.10E-12  | 5.80E-13 | 7.37E-08 | 2.25E-04 | 1.71E-01 | 3.58E-03 | 4.48E-01 |
| 768.54056 | 286.27 | 16.85 | 14.48 | 14.62 | 15.88 | 1.07E-10  | 3.15E-09 | 2.12E-08 | 5.16E-02 | 9.79E-01 | 1.81E-03 | 6.17E-03 |
| 768.68225 | 57.46  | 15.25 | 13.95 | 15.88 | 15.69 | 5.36E-21  | 1.18E-10 | 3.71E-03 | 9.24E-02 | 4.15E-14 | 4.42E-14 | 7.64E-01 |
| 768.70341 | 55.07  | 14.81 | 15.35 | 16.25 | 16.04 | 3.43E-24  | 3.27E-04 | 2.62E-14 | 4.36E-14 | 8.83E-10 | 7.32E-06 | 4.21E-01 |

|           |        |       |       |       |       |          |          |          |          |          |          |          |
|-----------|--------|-------|-------|-------|-------|----------|----------|----------|----------|----------|----------|----------|
| 768.74346 | 49.32  | 13.84 | 14.40 | 14.31 | 14.61 | 1.81E-10 | 1.80E-06 | 6.80E-05 | 1.23E-10 | 8.44E-01 | 2.46E-01 | 3.89E-02 |
| 768.86405 | 60.82  | 11.36 | 14.71 | 9.70  | 10.36 | 3.32E-63 | 5.11E-15 | 4.81E-13 | 3.38E-05 | 5.11E-15 | 5.11E-15 | 1.53E-02 |
| 768.8724  | 56.7   | 12.62 | 13.48 | 10.44 | 11.11 | 6.36E-53 | 3.75E-07 | 5.11E-15 | 4.35E-14 | 5.11E-15 | 5.11E-15 | 2.28E-04 |
| 769.50116 | 267.99 | 28.32 | 29.30 | 29.09 | 28.70 | 1.35E-08 | 1.97E-08 | 1.30E-05 | 9.51E-02 | 5.50E-01 | 2.35E-03 | 9.59E-02 |
| 769.69081 | 56.2   | 12.08 | 11.28 | 12.63 | 12.32 | 6.13E-03 | 1.52E-01 | 4.71E-01 | 9.29E-01 | 3.40E-03 | 4.89E-02 | 8.67E-01 |
| 769.70832 | 54.47  | 12.36 | 12.61 | 12.64 | 12.86 | 2.15E-01 | 7.12E-01 | 6.19E-01 | 1.46E-01 | 9.99E-01 | 7.11E-01 | 7.81E-01 |
| 769.75715 | 46.58  | 12.41 | 12.69 | 12.47 | 12.87 | 1.30E-01 | 5.25E-01 | 9.91E-01 | 1.36E-01 | 7.20E-01 | 8.46E-01 | 2.54E-01 |
| 769.78293 | 38.07  | 12.63 | 11.75 | 12.16 | 11.90 | 1.34E-01 | 1.17E-01 | 6.23E-01 | 2.73E-01 | 7.39E-01 | 9.84E-01 | 9.23E-01 |
| 770.50527 | 266.24 | 27.35 | 28.12 | 27.76 | 27.48 | 2.56E-08 | 2.41E-08 | 5.92E-03 | 7.45E-01 | 2.90E-02 | 1.51E-05 | 1.41E-01 |
| 770.64035 | 58.71  | 15.51 | 14.39 | 16.91 | 16.50 | 5.56E-20 | 4.42E-05 | 2.00E-07 | 7.34E-04 | 4.25E-14 | 2.18E-13 | 3.82E-01 |
| 770.66074 | 61.08  | 14.53 | 11.91 | 14.76 | 14.06 | 1.31E-40 | 5.11E-15 | 5.75E-01 | 4.92E-02 | 5.11E-15 | 1.60E-14 | 1.24E-03 |
| 770.68275 | 57.55  | 14.88 | 13.31 | 14.87 | 14.67 | 1.75E-20 | 4.42E-14 | 1.00E+00 | 5.74E-01 | 4.30E-14 | 1.06E-12 | 6.20E-01 |
| 770.70378 | 55.46  | 14.17 | 13.57 | 14.58 | 14.55 | 2.81E-12 | 1.09E-04 | 1.33E-02 | 3.40E-02 | 4.02E-11 | 5.59E-10 | 9.97E-01 |
| 770.73254 | 47.34  | 12.52 | 12.81 | 13.02 | 12.99 | 1.17E-01 | 5.77E-01 | 1.23E-01 | 1.90E-01 | 8.08E-01 | 8.83E-01 | 9.99E-01 |
| 770.83862 | 38.98  | 12.14 | 12.59 | 12.38 | 13.08 | 1.57E-03 | 2.06E-01 | 7.09E-01 | 6.75E-04 | 8.13E-01 | 2.08E-01 | 2.56E-02 |
| 771.51586 | 271.25 | 27.45 | 27.60 | 27.76 | 27.57 | 1.42E-01 | 6.60E-01 | 8.88E-02 | 8.30E-01 | 6.51E-01 | 9.94E-01 | 5.03E-01 |
| 771.7337  | 47.88  | 10.59 | 13.20 | 12.38 | 13.19 | 3.04E-17 | 5.06E-14 | 6.23E-08 | 8.34E-14 | 4.05E-02 | 1.00E+00 | 5.10E-02 |
| 772.52097 | 268.56 | 26.06 | 26.34 | 26.65 | 26.30 | 1.05E-02 | 3.98E-01 | 3.99E-03 | 5.57E-01 | 2.80E-01 | 9.97E-01 | 2.05E-01 |
| 772.55204 | 221.87 | 18.87 | 16.54 | 15.99 | 16.13 | 1.59E-24 | 4.98E-14 | 3.33E-14 | 4.14E-14 | 1.93E-01 | 4.78E-01 | 9.60E-01 |
| 772.63981 | 59.13  | 14.09 | 12.22 | 14.67 | 14.53 | 1.09E-16 | 5.86E-10 | 1.48E-01 | 4.07E-01 | 4.69E-14 | 5.99E-13 | 9.62E-01 |
| 772.73725 | 47.44  | 10.59 | 12.80 | 11.90 | 12.61 | 3.48E-09 | 1.42E-08 | 1.38E-03 | 4.71E-07 | 6.56E-02 | 9.60E-01 | 2.23E-01 |
| 772.77443 | 46.8   | 15.85 | 17.74 | 17.60 | 17.69 | 1.47E-28 | 1.64E-14 | 3.51E-14 | 3.18E-14 | 8.39E-01 | 9.92E-01 | 9.54E-01 |
| 772.79556 | 45.96  | 13.66 | 15.51 | 15.40 | 15.50 | 2.06E-23 | 4.24E-14 | 4.34E-14 | 4.35E-14 | 9.40E-01 | 1.00E+00 | 9.52E-01 |
| 773.52853 | 265.7  | 25.32 | 25.22 | 25.12 | 25.27 | 7.62E-01 | 9.56E-01 | 7.17E-01 | 9.94E-01 | 9.54E-01 | 9.96E-01 | 8.81E-01 |
| 774.56681 | 243.15 | 20.89 | 17.73 | 16.80 | 18.67 | 4.21E-32 | 3.29E-14 | 5.11E-15 | 1.99E-11 | 1.17E-02 | 1.37E-02 | 2.89E-08 |
| 774.65835 | 59.72  | 12.24 | 10.87 | 13.46 | 12.11 | 8.22E-16 | 4.29E-06 | 4.40E-05 | 9.66E-01 | 4.26E-14 | 1.07E-04 | 1.68E-05 |
| 774.7322  | 49.24  | 17.81 | 20.09 | 20.15 | 19.94 | 7.25E-47 | 5.11E-15 | 5.11E-15 | 5.11E-15 | 9.78E-01 | 7.81E-01 | 5.35E-01 |
| 774.77191 | 47.19  | 13.67 | 13.96 | 13.28 | 14.21 | 2.38E-02 | 7.58E-01 | 5.66E-01 | 2.91E-01 | 1.20E-01 | 8.60E-01 | 1.76E-02 |
| 775.57    | 242.26 | 19.82 | 15.84 | 13.73 | 16.90 | 1.69E-46 | 5.77E-15 | 5.11E-15 | 4.55E-14 | 5.43E-09 | 1.02E-02 | 4.34E-14 |
| 775.61294 | 291.51 | 17.20 | 16.63 | 17.22 | 18.38 | 1.08E-08 | 1.05E-01 | 1.00E+00 | 5.54E-05 | 1.01E-01 | 2.04E-09 | 1.03E-04 |
| 775.70132 | 53.14  | 12.15 | 12.34 | 12.58 | 12.43 | 1.92E-01 | 7.76E-01 | 1.36E-01 | 5.31E-01 | 6.46E-01 | 9.76E-01 | 8.86E-01 |
| 775.72738 | 42.58  | 12.61 | 12.45 | 12.16 | 12.52 | 8.38E-02 | 8.16E-01 | 6.05E-02 | 9.62E-01 | 3.92E-01 | 9.84E-01 | 2.30E-01 |
| 775.73751 | 48.51  | 13.83 | 15.10 | 15.08 | 14.99 | 7.85E-13 | 2.18E-10 | 2.91E-10 | 1.73E-08 | 9.99E-01 | 9.36E-01 | 9.63E-01 |
| 776.54527 | 241.26 | 24.31 | 21.95 | 22.01 | 22.00 | 1.10E-12 | 5.10E-10 | 1.04E-09 | 3.08E-09 | 9.98E-01 | 9.99E-01 | 1.00E+00 |
| 776.58243 | 257.2  | 17.38 | 15.60 | 14.93 | 18.26 | 7.29E-12 | 6.68E-04 | 8.97E-07 | 2.40E-01 | 4.86E-01 | 4.91E-07 | 2.01E-10 |
| 776.67171 | 57.43  | 16.55 | 16.44 | 17.60 | 17.35 | 3.07E-21 | 7.97E-01 | 5.07E-14 | 6.38E-09 | 4.40E-14 | 1.23E-10 | 2.29E-01 |
| 776.69969 | 53.38  | 12.86 | 12.34 | 12.24 | 12.41 | 1.65E-05 | 6.21E-04 | 1.75E-05 | 5.36E-03 | 8.57E-01 | 9.62E-01 | 5.86E-01 |
| 776.73003 | 49.17  | 16.74 | 18.68 | 18.80 | 18.66 | 1.07E-40 | 5.11E-15 | 5.11E-15 | 5.11E-15 | 8.33E-01 | 9.99E-01 | 7.83E-01 |
| 777.50225 | 282.07 | 12.90 | 17.35 | 9.43  | 9.58  | 1.78E-30 | 4.58E-11 | 2.46E-07 | 2.14E-06 | 5.33E-15 | 7.55E-15 | 9.95E-01 |
| 777.54846 | 240.53 | 22.55 | 21.58 | 21.62 | 20.90 | 2.95E-04 | 3.97E-02 | 5.17E-02 | 8.87E-05 | 9.99E-01 | 2.92E-01 | 2.30E-01 |
| 777.67234 | 58.29  | 12.94 | 12.19 | 13.15 | 12.88 | 1.58E-04 | 3.22E-03 | 7.46E-01 | 9.95E-01 | 9.88E-05 | 1.26E-02 | 6.34E-01 |
| 777.74073 | 47.26  | 12.88 | 12.75 | 12.71 | 12.69 | 7.26E-01 | 8.89E-01 | 7.73E-01 | 7.43E-01 | 9.96E-01 | 9.91E-01 | 1.00E+00 |
| 778.50532 | 289.23 | 15.19 | 16.36 | 15.02 | 15.15 | 5.59E-05 | 8.51E-04 | 9.43E-01 | 9.99E-01 | 1.33E-04 | 1.04E-03 | 9.81E-01 |
| 778.55661 | 250.25 | 21.64 | 21.24 | 21.34 | 20.50 | 1.62E-02 | 6.56E-01 | 8.19E-01 | 8.11E-03 | 9.92E-01 | 1.79E-01 | 9.50E-02 |
| 778.59727 | 264.38 | 13.14 | 18.51 | 18.78 | 17.59 | 6.65E-73 | 5.11E-15 | 5.11E-15 | 5.11E-15 | 6.47E-01 | 9.62E-04 | 6.93E-06 |

|           |        |       |       |       |       |          |          |          |          |          |          |          |
|-----------|--------|-------|-------|-------|-------|----------|----------|----------|----------|----------|----------|----------|
| 778.66709 | 61.44  | 13.77 | 11.85 | 13.01 | 13.11 | 1.07E-18 | 4.11E-14 | 2.80E-04 | 3.26E-03 | 2.41E-08 | 4.71E-09 | 9.58E-01 |
| 778.68462 | 55.37  | 14.87 | 15.28 | 15.85 | 15.57 | 1.53E-24 | 1.34E-05 | 8.66E-15 | 1.96E-13 | 6.56E-10 | 5.43E-03 | 7.33E-03 |
| 778.69353 | 47.52  | 14.61 | 14.19 | 15.17 | 14.96 | 1.52E-10 | 1.34E-02 | 2.85E-04 | 6.02E-02 | 1.68E-10 | 1.36E-06 | 4.67E-01 |
| 778.72554 | 51.78  | 13.24 | 12.47 | 12.52 | 13.10 | 1.39E-04 | 1.13E-03 | 2.42E-03 | 9.02E-01 | 9.95E-01 | 2.01E-02 | 3.61E-02 |
| 778.74732 | 46.6   | 13.15 | 14.50 | 14.13 | 14.37 | 1.88E-16 | 4.92E-14 | 7.25E-09 | 4.47E-12 | 9.07E-02 | 8.45E-01 | 4.62E-01 |
| 779.48768 | 288.19 | 13.69 | 16.33 | 15.44 | 16.03 | 2.47E-08 | 6.13E-08 | 5.36E-04 | 3.49E-06 | 2.03E-01 | 9.20E-01 | 5.78E-01 |
| 779.50038 | 210.42 | 9.41  | 12.22 | 13.92 | 9.04  | 8.92E-15 | 4.76E-05 | 1.65E-11 | 9.34E-01 | 3.62E-02 | 1.05E-05 | 5.22E-12 |
| 779.52375 | 282.78 | 19.80 | 20.03 | 19.98 | 19.53 | 3.14E-01 | 8.35E-01 | 9.07E-01 | 7.75E-01 | 9.98E-01 | 3.14E-01 | 3.96E-01 |
| 779.56268 | 241.28 | 19.85 | 17.58 | 17.87 | 18.55 | 4.05E-07 | 7.73E-07 | 1.72E-05 | 1.41E-02 | 9.02E-01 | 1.22E-01 | 4.00E-01 |
| 779.60101 | 262.82 | 12.88 | 16.77 | 17.25 | 15.68 | 2.47E-50 | 5.11E-15 | 5.11E-15 | 1.15E-14 | 1.84E-01 | 1.01E-04 | 5.53E-09 |
| 780.48117 | 202.12 | 11.35 | 14.64 | 14.61 | 13.11 | 9.89E-13 | 8.69E-11 | 8.76E-11 | 1.41E-03 | 1.00E+00 | 1.05E-02 | 1.18E-02 |
| 780.49002 | 206.36 | 10.42 | 13.72 | 12.99 | 12.11 | 4.42E-10 | 3.91E-10 | 1.00E-06 | 4.15E-03 | 4.49E-01 | 8.89E-03 | 2.93E-01 |
| 780.51304 | 288.01 | 14.17 | 15.42 | 15.14 | 14.81 | 8.41E-07 | 5.83E-07 | 1.31E-04 | 3.13E-02 | 6.29E-01 | 5.67E-02 | 5.05E-01 |
| 780.5249  | 283.76 | 18.63 | 19.20 | 19.06 | 18.71 | 5.57E-02 | 7.48E-02 | 2.59E-01 | 9.87E-01 | 9.33E-01 | 1.99E-01 | 4.92E-01 |
| 780.56672 | 222.48 | 17.75 | 15.87 | 16.20 | 16.94 | 5.56E-06 | 7.34E-06 | 2.83E-04 | 1.58E-01 | 8.23E-01 | 3.83E-02 | 2.45E-01 |
| 780.67334 | 55.28  | 13.42 | 12.86 | 13.68 | 13.54 | 5.18E-13 | 5.79E-07 | 5.18E-02 | 6.18E-01 | 8.11E-13 | 5.22E-09 | 5.98E-01 |
| 780.68164 | 54.71  | 14.98 | 15.17 | 15.81 | 15.66 | 1.98E-21 | 1.06E-01 | 4.12E-14 | 8.80E-13 | 1.47E-11 | 5.80E-07 | 3.36E-01 |
| 780.75325 | 38.15  | 13.01 | 13.42 | 12.85 | 13.42 | 4.72E-03 | 1.25E-01 | 8.45E-01 | 1.30E-01 | 1.80E-02 | 1.00E+00 | 1.99E-02 |
| 780.76101 | 43.68  | 14.99 | 17.46 | 16.83 | 17.27 | 4.70E-23 | 3.80E-14 | 6.20E-13 | 4.15E-14 | 4.54E-02 | 8.67E-01 | 2.84E-01 |
| 780.90887 | 52.17  | 9.01  | 12.80 | 8.22  | 8.67  | 5.88E-68 | 5.11E-15 | 1.90E-04 | 2.92E-01 | 5.11E-15 | 5.11E-15 | 1.05E-01 |
| 781.50265 | 265.81 | 19.06 | 18.72 | 18.25 | 17.86 | 6.84E-04 | 6.57E-01 | 2.97E-02 | 5.60E-04 | 3.97E-01 | 3.08E-02 | 5.90E-01 |
| 781.75864 | 46.42  | 11.66 | 12.89 | 12.67 | 12.93 | 3.12E-07 | 5.19E-06 | 2.18E-04 | 4.05E-06 | 8.18E-01 | 9.98E-01 | 7.31E-01 |
| 782.49905 | 243.26 | 19.68 | 19.13 | 19.33 | 19.11 | 8.30E-02 | 1.17E-01 | 4.77E-01 | 1.10E-01 | 8.56E-01 | 1.00E+00 | 8.27E-01 |
| 782.69717 | 55.99  | 13.37 | 12.46 | 13.79 | 13.30 | 2.79E-06 | 9.96E-04 | 2.85E-01 | 9.93E-01 | 7.23E-07 | 5.06E-03 | 2.11E-01 |
| 782.70942 | 48.19  | 13.03 | 11.96 | 12.43 | 12.45 | 2.67E-05 | 5.16E-06 | 2.28E-02 | 4.25E-02 | 1.35E-01 | 1.21E-01 | 9.99E-01 |
| 782.71869 | 54.15  | 14.19 | 13.62 | 14.46 | 14.47 | 6.32E-11 | 4.04E-05 | 1.20E-01 | 1.21E-01 | 1.19E-09 | 2.68E-09 | 1.00E+00 |
| 782.76876 | 38.31  | 12.64 | 12.74 | 13.09 | 13.27 | 6.43E-02 | 9.77E-01 | 2.76E-01 | 8.06E-02 | 5.35E-01 | 2.14E-01 | 9.17E-01 |
| 782.77627 | 43.7   | 14.10 | 17.21 | 16.62 | 16.59 | 5.03E-25 | 1.67E-14 | 4.19E-14 | 4.47E-14 | 1.49E-01 | 1.41E-01 | 1.00E+00 |
| 782.84373 | 61.09  | 11.41 | 14.17 | 9.72  | 10.27 | 3.20E-75 | 5.11E-15 | 3.24E-14 | 1.40E-10 | 5.11E-15 | 5.11E-15 | 6.04E-03 |
| 783.51397 | 285.89 | 22.17 | 20.99 | 22.35 | 21.55 | 9.16E-08 | 6.75E-06 | 8.78E-01 | 5.55E-02 | 3.23E-07 | 1.09E-01 | 8.31E-03 |
| 783.69077 | 55.04  | 11.19 | 12.82 | 12.99 | 13.02 | 3.03E-09 | 2.65E-06 | 1.47E-07 | 2.47E-07 | 9.55E-01 | 9.33E-01 | 1.00E+00 |
| 784.52004 | 280.89 | 20.85 | 19.70 | 20.83 | 20.07 | 1.45E-07 | 2.90E-06 | 1.00E+00 | 4.14E-03 | 7.03E-06 | 3.86E-01 | 6.76E-03 |
| 784.66793 | 49.68  | 12.95 | 11.60 | 12.55 | 12.64 | 4.16E-04 | 1.96E-04 | 5.83E-01 | 7.78E-01 | 2.02E-02 | 1.20E-02 | 9.93E-01 |
| 784.67667 | 56.28  | 14.42 | 13.41 | 14.79 | 14.55 | 3.67E-21 | 1.27E-12 | 1.76E-02 | 7.38E-01 | 3.65E-14 | 7.41E-14 | 2.73E-01 |
| 784.7164  | 47.16  | 14.19 | 13.33 | 13.50 | 13.84 | 1.60E-17 | 4.42E-14 | 1.08E-11 | 1.92E-03 | 2.73E-01 | 2.35E-06 | 3.02E-03 |
| 784.77105 | 42.96  | 12.40 | 12.91 | 13.04 | 13.36 | 1.69E-04 | 7.62E-02 | 1.27E-02 | 6.20E-05 | 9.29E-01 | 1.59E-01 | 4.30E-01 |
| 785.47393 | 177.32 | 13.21 | 15.47 | 15.48 | 13.81 | 3.86E-06 | 9.06E-05 | 7.07E-05 | 6.64E-01 | 1.00E+00 | 1.24E-02 | 1.09E-02 |
| 785.52056 | 287.08 | 18.19 | 17.32 | 17.48 | 17.24 | 1.67E-03 | 6.81E-03 | 3.68E-02 | 3.10E-03 | 9.38E-01 | 9.90E-01 | 8.17E-01 |
| 785.53863 | 288.42 | 13.36 | 14.39 | 14.19 | 14.09 | 8.25E-03 | 7.16E-03 | 4.12E-02 | 1.15E-01 | 9.31E-01 | 8.02E-01 | 9.88E-01 |
| 785.68474 | 55.77  | 12.97 | 11.80 | 12.94 | 13.19 | 8.57E-07 | 3.85E-05 | 1.00E+00 | 8.39E-01 | 9.11E-05 | 2.85E-06 | 7.93E-01 |
| 785.73383 | 47.59  | 11.02 | 12.87 | 12.82 | 12.77 | 3.37E-17 | 1.43E-13 | 2.90E-13 | 5.13E-12 | 9.97E-01 | 9.77E-01 | 9.97E-01 |
| 786.51955 | 257.8  | 22.75 | 20.86 | 20.56 | 23.22 | 2.10E-21 | 7.20E-10 | 7.08E-13 | 3.44E-01 | 7.09E-01 | 3.89E-13 | 4.33E-14 |
| 786.56439 | 206.47 | 15.02 | 15.62 | 15.13 | 14.34 | 9.31E-03 | 3.21E-01 | 9.89E-01 | 2.34E-01 | 5.19E-01 | 3.59E-03 | 1.40E-01 |
| 786.66861 | 49.28  | 12.26 | 11.55 | 11.75 | 12.07 | 1.00E-01 | 9.22E-02 | 3.29E-01 | 9.26E-01 | 9.16E-01 | 3.72E-01 | 7.50E-01 |
| 786.67753 | 57.03  | 13.39 | 12.48 | 13.23 | 13.30 | 1.28E-04 | 1.61E-04 | 8.67E-01 | 9.75E-01 | 3.75E-03 | 1.83E-03 | 9.89E-01 |

|           |        |       |       |       |       |          |          |          |          |          |          |          |
|-----------|--------|-------|-------|-------|-------|----------|----------|----------|----------|----------|----------|----------|
| 786.73527 | 47.04  | 12.57 | 12.93 | 12.77 | 13.10 | 1.37E-01 | 3.92E-01 | 7.99E-01 | 1.05E-01 | 9.10E-01 | 8.88E-01 | 5.15E-01 |
| 786.79198 | 40.46  | 12.32 | 12.46 | 12.01 | 13.54 | 2.00E-03 | 9.82E-01 | 8.57E-01 | 1.29E-02 | 6.65E-01 | 4.53E-02 | 1.23E-03 |
| 786.80185 | 39.13  | 11.62 | 12.22 | 11.82 | 12.41 | 9.02E-03 | 7.72E-02 | 8.41E-01 | 1.11E-02 | 4.03E-01 | 8.80E-01 | 1.08E-01 |
| 786.81085 | 45.29  | 13.45 | 13.69 | 13.72 | 14.09 | 2.20E-03 | 4.18E-01 | 3.25E-01 | 6.54E-04 | 9.99E-01 | 8.67E-02 | 1.15E-01 |
| 787.52249 | 257.07 | 21.74 | 19.81 | 19.98 | 22.01 | 6.24E-17 | 2.25E-10 | 5.62E-09 | 7.91E-01 | 9.27E-01 | 9.16E-12 | 2.22E-10 |
| 788.53456 | 257.57 | 23.24 | 22.69 | 22.72 | 22.21 | 8.12E-03 | 2.22E-01 | 2.56E-01 | 3.03E-03 | 1.00E+00 | 3.85E-01 | 3.27E-01 |
| 788.58174 | 205.46 | 16.35 | 16.00 | 15.97 | 15.59 | 3.28E-03 | 2.79E-01 | 2.03E-01 | 1.01E-03 | 9.99E-01 | 1.88E-01 | 2.42E-01 |
| 788.59085 | 198.18 | 14.79 | 14.71 | 14.37 | 14.09 | 1.90E-02 | 9.85E-01 | 2.83E-01 | 2.13E-02 | 5.07E-01 | 6.45E-02 | 6.57E-01 |
| 788.74873 | 48.24  | 15.97 | 17.53 | 17.48 | 17.51 | 2.61E-29 | 1.71E-14 | 2.31E-14 | 2.71E-14 | 9.89E-01 | 1.00E+00 | 9.97E-01 |
| 788.76935 | 47.42  | 13.17 | 16.01 | 16.02 | 15.96 | 6.64E-32 | 7.55E-15 | 6.88E-15 | 1.60E-14 | 1.00E+00 | 9.96E-01 | 9.94E-01 |
| 789.47098 | 216.93 | 16.25 | 17.44 | 17.71 | 16.43 | 8.38E-08 | 1.61E-04 | 1.69E-06 | 9.27E-01 | 7.80E-01 | 3.61E-03 | 9.40E-05 |
| 789.5457  | 255.16 | 21.05 | 19.14 | 19.21 | 19.74 | 3.61E-10 | 6.49E-09 | 1.52E-08 | 1.81E-04 | 9.97E-01 | 2.31E-01 | 3.20E-01 |
| 789.588   | 196.27 | 14.99 | 14.37 | 14.41 | 13.85 | 2.66E-06 | 1.07E-02 | 1.88E-02 | 4.33E-07 | 9.97E-01 | 6.95E-02 | 3.91E-02 |
| 790.47659 | 221    | 13.71 | 14.40 | 15.13 | 13.86 | 2.23E-03 | 3.03E-01 | 2.03E-03 | 9.81E-01 | 2.73E-01 | 5.75E-01 | 1.34E-02 |
| 790.50242 | 201.26 | 15.14 | 14.80 | 14.72 | 14.61 | 1.26E-01 | 4.50E-01 | 2.57E-01 | 1.13E-01 | 9.87E-01 | 8.61E-01 | 9.67E-01 |
| 790.50976 | 292.44 | 19.11 | 21.02 | 20.90 | 20.09 | 4.09E-07 | 1.98E-06 | 7.71E-06 | 4.59E-02 | 9.88E-01 | 7.25E-02 | 1.43E-01 |
| 790.55455 | 258.9  | 23.25 | 22.67 | 22.55 | 22.18 | 1.11E-04 | 5.39E-02 | 1.06E-02 | 3.95E-05 | 9.51E-01 | 1.69E-01 | 4.04E-01 |
| 790.70613 | 51.76  | 17.83 | 19.51 | 19.83 | 19.57 | 3.67E-48 | 5.11E-15 | 5.11E-15 | 5.11E-15 | 3.22E-02 | 9.54E-01 | 1.38E-01 |
| 790.74811 | 48.03  | 13.54 | 13.93 | 13.43 | 14.47 | 7.29E-04 | 4.46E-01 | 9.73E-01 | 3.07E-03 | 2.40E-01 | 1.91E-01 | 8.86E-04 |
| 790.76802 | 46.85  | 12.05 | 13.19 | 13.34 | 13.50 | 7.51E-10 | 5.77E-06 | 1.45E-07 | 1.13E-08 | 9.04E-01 | 5.51E-01 | 9.09E-01 |
| 791.48716 | 231.5  | 21.94 | 22.68 | 22.75 | 22.12 | 1.19E-08 | 6.02E-06 | 3.75E-07 | 6.21E-01 | 9.57E-01 | 2.27E-03 | 3.12E-04 |
| 791.51979 | 293.98 | 15.67 | 18.65 | 19.16 | 16.87 | 9.44E-09 | 4.64E-06 | 4.76E-08 | 1.92E-01 | 8.34E-01 | 2.27E-02 | 1.41E-03 |
| 791.5597  | 259.28 | 22.29 | 21.40 | 21.50 | 20.83 | 8.94E-05 | 1.89E-02 | 4.49E-02 | 2.49E-05 | 9.88E-01 | 2.74E-01 | 1.44E-01 |
| 791.67948 | 55.93  | 12.21 | 11.77 | 13.25 | 12.76 | 3.99E-07 | 3.17E-01 | 3.90E-04 | 1.59E-01 | 3.29E-07 | 1.76E-03 | 2.78E-01 |
| 791.70891 | 51.97  | 12.75 | 13.11 | 13.28 | 13.64 | 1.05E-03 | 3.17E-01 | 5.97E-02 | 3.80E-04 | 8.71E-01 | 9.42E-02 | 3.77E-01 |
| 792.49106 | 231.01 | 20.81 | 21.56 | 21.67 | 20.94 | 4.72E-09 | 9.76E-06 | 2.35E-07 | 8.23E-01 | 8.97E-01 | 9.58E-04 | 5.33E-05 |
| 792.56992 | 255.64 | 21.05 | 19.32 | 19.53 | 19.48 | 1.57E-06 | 9.10E-06 | 1.04E-04 | 1.11E-04 | 9.37E-01 | 9.73E-01 | 9.99E-01 |
| 792.64545 | 59.12  | 14.35 | 13.42 | 15.17 | 14.94 | 1.46E-33 | 3.01E-12 | 5.75E-10 | 2.56E-05 | 5.11E-15 | 8.88E-15 | 2.67E-01 |
| 792.6514  | 51.82  | 13.77 | 12.76 | 14.34 | 14.20 | 1.18E-22 | 1.38E-10 | 6.14E-04 | 2.03E-02 | 3.33E-14 | 4.51E-14 | 8.17E-01 |
| 792.6754  | 56.36  | 12.53 | 11.72 | 12.16 | 12.28 | 1.65E-04 | 4.78E-05 | 1.50E-01 | 5.29E-01 | 7.60E-02 | 1.51E-02 | 9.05E-01 |
| 792.70407 | 52.02  | 16.79 | 18.25 | 18.63 | 18.35 | 1.62E-37 | 1.04E-14 | 5.11E-15 | 6.00E-15 | 1.31E-02 | 8.69E-01 | 1.23E-01 |
| 792.75033 | 47.36  | 9.20  | 12.63 | 12.45 | 11.99 | 9.49E-16 | 2.19E-13 | 1.68E-12 | 3.95E-09 | 9.74E-01 | 4.80E-01 | 7.30E-01 |
| 793.1012  | 62.17  | 12.19 | 12.27 | 10.08 | 10.90 | 7.79E-30 | 9.74E-01 | 1.07E-14 | 3.04E-10 | 1.02E-14 | 8.55E-11 | 1.43E-04 |
| 793.11318 | 54.04  | 12.15 | 13.15 | 10.14 | 10.96 | 1.88E-42 | 2.03E-07 | 1.24E-14 | 1.47E-09 | 5.11E-15 | 8.66E-15 | 6.39E-05 |
| 793.50044 | 255.23 | 27.47 | 26.67 | 27.21 | 26.61 | 4.73E-02 | 1.07E-01 | 8.85E-01 | 8.29E-02 | 4.28E-01 | 9.98E-01 | 3.54E-01 |
| 793.71587 | 49.2   | 11.61 | 12.64 | 12.74 | 12.89 | 7.21E-09 | 1.23E-05 | 9.92E-07 | 8.58E-08 | 9.65E-01 | 6.86E-01 | 9.13E-01 |
| 794.5043  | 257.64 | 26.26 | 25.64 | 25.56 | 25.49 | 8.00E-02 | 2.33E-01 | 1.46E-01 | 1.05E-01 | 9.96E-01 | 9.74E-01 | 9.96E-01 |
| 794.64685 | 61.88  | 12.54 | 11.66 | 11.77 | 11.98 | 2.34E-05 | 3.35E-05 | 3.38E-04 | 2.34E-02 | 9.38E-01 | 3.68E-01 | 7.08E-01 |
| 794.65291 | 49.89  | 13.03 | 12.41 | 13.41 | 12.90 | 2.15E-08 | 2.66E-04 | 6.08E-02 | 8.39E-01 | 2.93E-09 | 1.05E-02 | 8.66E-03 |
| 794.66348 | 57.17  | 15.61 | 15.82 | 16.89 | 16.53 | 1.85E-16 | 5.15E-01 | 5.46E-14 | 5.72E-08 | 2.17E-10 | 6.49E-05 | 1.10E-01 |
| 794.70098 | 55.22  | 13.14 | 12.14 | 12.42 | 12.64 | 3.83E-04 | 1.79E-04 | 1.21E-02 | 1.60E-01 | 6.43E-01 | 1.90E-01 | 8.18E-01 |
| 794.71906 | 48.46  | 11.16 | 12.85 | 12.76 | 12.91 | 3.47E-15 | 9.18E-12 | 7.17E-11 | 6.69E-12 | 9.78E-01 | 9.95E-01 | 9.22E-01 |
| 794.79868 | 43.08  | 13.52 | 15.87 | 15.42 | 15.63 | 4.28E-16 | 7.24E-14 | 3.46E-10 | 1.70E-11 | 3.95E-01 | 8.57E-01 | 8.83E-01 |
| 795.51465 | 268.75 | 28.15 | 28.84 | 28.69 | 28.12 | 1.96E-09 | 5.89E-07 | 9.91E-05 | 9.98E-01 | 6.71E-01 | 1.02E-06 | 1.24E-04 |
| 796.51905 | 269.33 | 26.95 | 27.62 | 27.37 | 26.88 | 3.54E-09 | 5.83E-07 | 3.53E-03 | 9.15E-01 | 1.77E-01 | 1.00E-07 | 6.78E-04 |

|           |        |       |       |       |       |          |          |          |          |          |          |          |
|-----------|--------|-------|-------|-------|-------|----------|----------|----------|----------|----------|----------|----------|
| 796.6528  | 56.97  | 13.71 | 12.75 | 13.78 | 13.72 | 7.56E-29 | 2.00E-14 | 8.68E-01 | 1.00E+00 | 1.04E-14 | 3.40E-14 | 9.16E-01 |
| 796.66484 | 50.8   | 13.32 | 12.51 | 12.67 | 12.99 | 3.70E-08 | 5.98E-08 | 1.66E-05 | 9.64E-02 | 6.47E-01 | 4.55E-03 | 1.06E-01 |
| 796.72539 | 38.91  | 12.48 | 13.22 | 12.85 | 13.28 | 4.65E-03 | 1.29E-02 | 4.01E-01 | 8.49E-03 | 4.47E-01 | 9.97E-01 | 3.49E-01 |
| 796.74204 | 45.29  | 13.76 | 15.88 | 15.27 | 15.80 | 4.54E-22 | 4.05E-14 | 3.18E-11 | 4.35E-14 | 2.27E-02 | 9.81E-01 | 7.64E-02 |
| 796.79463 | 43.55  | 11.67 | 12.81 | 11.99 | 12.86 | 2.59E-03 | 1.25E-02 | 8.23E-01 | 9.95E-03 | 1.33E-01 | 9.99E-01 | 1.08E-01 |
| 796.88554 | 60.67  | 12.55 | 12.53 | 10.62 | 11.21 | 1.05E-47 | 9.97E-01 | 5.11E-15 | 2.55E-14 | 5.11E-15 | 3.80E-14 | 2.25E-05 |
| 797.5234  | 267.31 | 25.21 | 25.19 | 25.14 | 24.51 | 1.83E-06 | 9.98E-01 | 9.56E-01 | 6.76E-06 | 9.89E-01 | 2.72E-05 | 8.85E-05 |
| 797.73437 | 47.02  | 11.83 | 12.80 | 12.57 | 13.22 | 1.02E-08 | 4.00E-05 | 2.48E-03 | 3.73E-09 | 7.17E-01 | 2.21E-01 | 1.73E-02 |
| 798.5309  | 267.45 | 22.87 | 22.47 | 22.54 | 21.88 | 1.65E-06 | 9.11E-02 | 2.16E-01 | 2.72E-07 | 9.75E-01 | 6.40E-03 | 1.41E-03 |
| 798.5663  | 241.46 | 21.52 | 18.70 | 18.42 | 18.99 | 8.41E-34 | 6.22E-15 | 5.11E-15 | 3.53E-14 | 6.60E-01 | 6.28E-01 | 9.42E-02 |
| 798.6921  | 56.15  | 13.62 | 12.55 | 14.14 | 14.07 | 2.03E-14 | 6.12E-07 | 3.71E-02 | 1.05E-01 | 4.25E-13 | 1.34E-11 | 9.89E-01 |
| 798.75122 | 45.9   | 13.95 | 15.73 | 15.29 | 15.47 | 8.35E-26 | 1.24E-14 | 4.63E-14 | 4.26E-14 | 2.57E-02 | 3.92E-01 | 6.46E-01 |
| 798.76023 | 39.8   | 13.70 | 14.61 | 13.93 | 14.42 | 9.86E-05 | 1.91E-04 | 6.94E-01 | 6.33E-03 | 1.18E-02 | 8.45E-01 | 1.28E-01 |
| 799.55118 | 262.01 | 21.86 | 20.00 | 19.94 | 19.88 | 4.22E-23 | 4.17E-14 | 4.14E-14 | 4.29E-14 | 9.91E-01 | 9.40E-01 | 9.92E-01 |
| 799.66092 | 57.92  | 11.43 | 11.15 | 12.05 | 12.22 | 2.29E-05 | 6.16E-01 | 3.97E-02 | 6.26E-03 | 1.10E-03 | 1.17E-04 | 8.98E-01 |
| 800.54586 | 258.03 | 20.81 | 20.64 | 20.94 | 20.05 | 4.35E-03 | 8.93E-01 | 9.48E-01 | 1.48E-02 | 6.12E-01 | 1.09E-01 | 3.36E-03 |
| 800.57927 | 238.79 | 19.43 | 15.07 | 14.47 | 16.98 | 6.19E-38 | 5.11E-15 | 5.11E-15 | 4.60E-11 | 2.85E-01 | 8.15E-07 | 4.68E-11 |
| 800.65392 | 49.23  | 12.76 | 11.18 | 12.38 | 12.51 | 1.40E-10 | 1.75E-10 | 3.37E-01 | 7.17E-01 | 2.26E-06 | 3.50E-07 | 9.45E-01 |
| 800.69201 | 55.71  | 13.46 | 13.05 | 13.40 | 13.49 | 2.31E-01 | 2.75E-01 | 9.91E-01 | 1.00E+00 | 4.50E-01 | 2.75E-01 | 9.82E-01 |
| 800.74845 | 45.01  | 12.16 | 13.95 | 13.57 | 14.10 | 1.74E-16 | 4.67E-13 | 7.88E-09 | 7.32E-14 | 3.32E-01 | 9.31E-01 | 1.11E-01 |
| 801.54889 | 245.16 | 18.79 | 18.54 | 18.67 | 18.04 | 7.31E-02 | 8.29E-01 | 9.79E-01 | 5.61E-02 | 9.70E-01 | 3.44E-01 | 1.50E-01 |
| 801.58518 | 247.66 | 16.68 | 13.29 | 12.71 | 15.03 | 8.97E-28 | 4.11E-14 | 6.66E-15 | 1.26E-05 | 3.15E-01 | 6.27E-06 | 8.01E-10 |
| 801.71148 | 49.86  | 11.54 | 13.08 | 12.64 | 12.76 | 6.91E-07 | 6.91E-07 | 5.66E-04 | 1.88E-04 | 4.28E-01 | 7.11E-01 | 9.77E-01 |
| 802.56    | 279.32 | 21.15 | 21.16 | 20.79 | 20.86 | 3.13E-01 | 1.00E+00 | 4.38E-01 | 6.43E-01 | 4.50E-01 | 6.48E-01 | 9.93E-01 |
| 802.59849 | 247.52 | 14.24 | 17.90 | 18.59 | 17.40 | 9.39E-26 | 4.39E-14 | 1.07E-14 | 1.42E-13 | 2.70E-01 | 5.92E-01 | 1.42E-02 |
| 802.76629 | 44.11  | 12.63 | 12.68 | 12.61 | 13.29 | 2.78E-01 | 9.99E-01 | 1.00E+00 | 3.29E-01 | 9.98E-01 | 4.15E-01 | 3.19E-01 |
| 802.78673 | 46.91  | 13.63 | 14.10 | 14.20 | 14.51 | 4.56E-10 | 6.16E-04 | 2.11E-05 | 9.95E-11 | 8.76E-01 | 9.36E-03 | 6.84E-02 |
| 803.60039 | 243.31 | 13.52 | 17.48 | 17.38 | 16.87 | 1.66E-35 | 5.11E-15 | 5.11E-15 | 2.51E-14 | 9.86E-01 | 1.93E-01 | 3.40E-01 |
| 803.84075 | 51.89  | 12.93 | 10.57 | 12.07 | 13.05 | 1.24E-14 | 1.11E-12 | 2.15E-02 | 9.82E-01 | 1.19E-05 | 1.46E-12 | 1.14E-02 |
| 804.51112 | 289.08 | 12.11 | 14.04 | 13.51 | 14.54 | 2.08E-06 | 1.61E-04 | 1.01E-02 | 2.02E-06 | 6.64E-01 | 7.15E-01 | 1.32E-01 |
| 804.52343 | 283.35 | 14.58 | 16.36 | 15.49 | 16.42 | 3.53E-11 | 2.87E-09 | 5.19E-03 | 1.91E-09 | 1.05E-02 | 9.96E-01 | 6.35E-03 |
| 804.57428 | 241.14 | 22.13 | 20.56 | 20.55 | 21.02 | 3.73E-11 | 2.12E-09 | 1.11E-09 | 5.68E-05 | 1.00E+00 | 2.65E-01 | 2.36E-01 |
| 804.61217 | 264.91 | 14.24 | 16.58 | 17.65 | 15.60 | 1.06E-15 | 1.86E-08 | 4.27E-14 | 3.21E-03 | 3.32E-02 | 6.96E-02 | 3.38E-06 |
| 804.62141 | 269.31 | 9.13  | 12.95 | 13.72 | 11.95 | 2.38E-13 | 2.15E-09 | 5.69E-13 | 2.46E-05 | 5.67E-01 | 3.61E-01 | 2.05E-02 |
| 804.71338 | 44.51  | 12.99 | 12.46 | 12.28 | 12.77 | 6.29E-06 | 1.43E-03 | 6.61E-06 | 4.19E-01 | 6.16E-01 | 1.78E-01 | 7.47E-03 |
| 804.72181 | 50.49  | 15.78 | 16.86 | 16.89 | 16.93 | 7.28E-18 | 5.42E-13 | 1.32E-13 | 1.25E-13 | 9.97E-01 | 9.63E-01 | 9.91E-01 |
| 804.74088 | 42.16  | 13.67 | 15.71 | 15.92 | 15.73 | 1.66E-34 | 7.33E-15 | 5.11E-15 | 8.88E-15 | 6.32E-01 | 9.99E-01 | 7.33E-01 |
| 804.78055 | 36.78  | 12.71 | 12.76 | 12.36 | 13.06 | 5.08E-02 | 9.96E-01 | 4.36E-01 | 4.84E-01 | 3.37E-01 | 6.43E-01 | 2.64E-02 |
| 805.49826 | 192.98 | 7.90  | 12.11 | 12.05 | 11.66 | 4.31E-21 | 4.39E-14 | 4.33E-14 | 1.65E-13 | 9.99E-01 | 7.85E-01 | 8.43E-01 |
| 805.50628 | 225.91 | 12.68 | 14.94 | 15.33 | 14.58 | 2.91E-06 | 1.31E-04 | 4.18E-06 | 2.63E-03 | 8.92E-01 | 9.14E-01 | 5.29E-01 |
| 805.57982 | 244.26 | 20.98 | 19.08 | 18.99 | 19.35 | 2.41E-19 | 4.46E-14 | 4.44E-14 | 3.10E-11 | 9.81E-01 | 6.19E-01 | 3.83E-01 |
| 806.49787 | 249.54 | 20.89 | 19.79 | 20.12 | 20.09 | 2.99E-05 | 1.66E-05 | 4.55E-03 | 4.56E-03 | 4.87E-01 | 5.89E-01 | 9.99E-01 |
| 806.53313 | 294.21 | 13.23 | 15.48 | 15.29 | 13.80 | 3.87E-08 | 9.47E-07 | 7.35E-06 | 5.37E-01 | 9.66E-01 | 9.60E-04 | 4.32E-03 |
| 806.58416 | 268.52 | 17.21 | 16.38 | 16.32 | 15.92 | 5.35E-04 | 3.34E-02 | 1.85E-02 | 2.86E-04 | 9.98E-01 | 4.81E-01 | 5.82E-01 |
| 806.62848 | 298.05 | 11.96 | 12.14 | 12.78 | 13.54 | 5.68E-05 | 9.48E-01 | 7.55E-02 | 6.54E-05 | 2.67E-01 | 8.57E-04 | 1.51E-01 |

|           |        |       |       |       |       |          |          |          |          |          |          |          |
|-----------|--------|-------|-------|-------|-------|----------|----------|----------|----------|----------|----------|----------|
| 806.68046 | 54.36  | 17.41 | 18.57 | 19.20 | 18.94 | 2.28E-36 | 4.31E-14 | 5.11E-15 | 5.77E-15 | 4.81E-06 | 2.52E-02 | 1.60E-01 |
| 806.74218 | 48.26  | 12.29 | 13.69 | 13.89 | 13.87 | 9.51E-19 | 2.19E-12 | 4.27E-14 | 6.61E-14 | 7.28E-01 | 8.04E-01 | 1.00E+00 |
| 806.75107 | 41.82  | 12.35 | 12.89 | 12.68 | 12.64 | 2.57E-02 | 1.24E-02 | 2.30E-01 | 3.78E-01 | 6.45E-01 | 5.27E-01 | 9.96E-01 |
| 807.09904 | 17.63  | 10.73 | 12.39 | 11.86 | 12.83 | 1.66E-12 | 1.31E-08 | 1.58E-04 | 3.48E-12 | 2.08E-01 | 4.18E-01 | 3.64E-03 |
| 807.50786 | 259.44 | 22.03 | 19.99 | 20.47 | 20.10 | 3.19E-09 | 3.19E-08 | 2.80E-05 | 3.67E-07 | 5.00E-01 | 9.90E-01 | 7.16E-01 |
| 807.58921 | 202.82 | 17.03 | 15.14 | 15.07 | 14.50 | 9.44E-24 | 6.23E-14 | 4.26E-14 | 2.55E-14 | 9.92E-01 | 3.49E-02 | 6.85E-02 |
| 807.68397 | 55.36  | 12.02 | 12.49 | 12.73 | 12.67 | 5.53E-03 | 1.40E-01 | 6.44E-03 | 1.95E-02 | 7.02E-01 | 8.50E-01 | 9.95E-01 |
| 808.51543 | 252.9  | 21.47 | 19.65 | 20.65 | 20.03 | 1.58E-15 | 4.51E-14 | 4.60E-04 | 7.20E-10 | 2.90E-05 | 3.11E-01 | 2.62E-02 |
| 808.55031 | 199.46 | 14.18 | 14.27 | 13.88 | 13.64 | 5.28E-02 | 9.82E-01 | 5.76E-01 | 1.25E-01 | 3.77E-01 | 6.29E-02 | 7.77E-01 |
| 808.61662 | 61.68  | 13.73 | 12.16 | 14.71 | 14.25 | 1.25E-23 | 5.18E-11 | 6.18E-05 | 1.04E-01 | 1.60E-14 | 4.29E-14 | 1.81E-01 |
| 808.64754 | 58.04  | 12.11 | 10.32 | 12.07 | 11.79 | 2.39E-13 | 7.24E-12 | 9.98E-01 | 5.54E-01 | 4.61E-11 | 9.48E-08 | 6.67E-01 |
| 808.67825 | 54.7   | 16.55 | 17.55 | 18.23 | 17.93 | 2.94E-33 | 8.39E-14 | 5.11E-15 | 1.98E-14 | 3.32E-07 | 1.42E-02 | 7.50E-02 |
| 808.81251 | 38.32  | 11.55 | 12.54 | 12.27 | 12.76 | 4.19E-03 | 2.19E-02 | 1.48E-01 | 3.88E-03 | 8.69E-01 | 9.30E-01 | 5.26E-01 |
| 809.07542 | 54.56  | 12.36 | 12.48 | 10.46 | 11.10 | 1.97E-35 | 8.65E-01 | 5.11E-15 | 1.73E-13 | 5.11E-15 | 4.82E-14 | 2.97E-04 |
| 809.09087 | 63.38  | 11.43 | 13.43 | 9.74  | 10.42 | 2.39E-49 | 3.55E-14 | 4.35E-14 | 2.37E-06 | 5.11E-15 | 5.11E-15 | 3.40E-03 |
| 809.52684 | 274.88 | 20.52 | 19.99 | 20.51 | 19.59 | 2.34E-06 | 2.72E-02 | 1.00E+00 | 1.68E-05 | 3.39E-02 | 1.88E-01 | 2.79E-05 |
| 810.52925 | 248.92 | 22.85 | 21.34 | 21.62 | 21.67 | 1.06E-06 | 1.75E-06 | 1.29E-04 | 4.58E-04 | 7.64E-01 | 6.88E-01 | 9.98E-01 |
| 810.56596 | 243.88 | 18.53 | 18.74 | 18.31 | 17.47 | 3.65E-03 | 9.25E-01 | 9.13E-01 | 1.42E-02 | 5.98E-01 | 2.72E-03 | 8.91E-02 |
| 810.77405 | 44.76  | 14.77 | 17.93 | 17.64 | 17.78 | 1.07E-30 | 6.88E-15 | 2.40E-14 | 2.00E-14 | 6.99E-01 | 9.46E-01 | 9.59E-01 |
| 811.53275 | 243.89 | 21.58 | 20.05 | 20.18 | 20.59 | 6.57E-08 | 2.58E-07 | 2.23E-06 | 2.33E-03 | 9.65E-01 | 2.34E-01 | 4.71E-01 |
| 811.56914 | 232.44 | 16.61 | 16.09 | 15.53 | 15.10 | 4.52E-05 | 3.72E-01 | 4.09E-03 | 3.80E-05 | 3.06E-01 | 1.76E-02 | 5.68E-01 |
| 811.77498 | 46.3   | 12.73 | 12.60 | 12.78 | 12.75 | 8.74E-01 | 9.36E-01 | 9.96E-01 | 1.00E+00 | 8.58E-01 | 9.25E-01 | 9.99E-01 |
| 812.54124 | 249.58 | 20.68 | 19.31 | 19.28 | 19.97 | 1.43E-06 | 1.48E-05 | 8.52E-06 | 7.19E-02 | 1.00E+00 | 1.25E-01 | 1.02E-01 |
| 812.58128 | 237.28 | 17.21 | 16.93 | 16.56 | 16.13 | 4.82E-03 | 7.76E-01 | 1.32E-01 | 3.07E-03 | 6.40E-01 | 6.15E-02 | 5.15E-01 |
| 812.62991 | 59.95  | 13.41 | 11.30 | 15.54 | 14.65 | 2.93E-36 | 1.67E-12 | 7.08E-13 | 8.40E-05 | 5.11E-15 | 1.07E-14 | 9.85E-03 |
| 812.71013 | 47.31  | 13.94 | 15.34 | 14.74 | 14.98 | 3.23E-18 | 4.30E-14 | 2.34E-07 | 7.20E-11 | 2.88E-04 | 8.23E-02 | 3.65E-01 |
| 812.71937 | 41.39  | 13.33 | 13.61 | 13.14 | 13.69 | 2.21E-02 | 4.56E-01 | 7.33E-01 | 2.59E-01 | 7.25E-02 | 9.80E-01 | 3.04E-02 |
| 812.76611 | 45.23  | 12.35 | 14.13 | 13.80 | 14.29 | 3.14E-19 | 4.81E-14 | 8.00E-11 | 4.23E-14 | 3.81E-01 | 8.83E-01 | 1.01E-01 |
| 812.77844 | 39.77  | 12.56 | 12.66 | 12.46 | 13.11 | 1.70E-02 | 9.57E-01 | 9.63E-01 | 4.29E-02 | 7.70E-01 | 1.59E-01 | 1.35E-02 |
| 813.47243 | 214.52 | 15.39 | 16.80 | 16.80 | 15.54 | 1.00E-09 | 9.54E-07 | 7.55E-07 | 9.38E-01 | 1.00E+00 | 4.83E-05 | 4.15E-05 |
| 813.49034 | 287.58 | 14.85 | 16.09 | 16.43 | 16.77 | 1.11E-12 | 5.60E-06 | 3.78E-09 | 5.16E-12 | 5.42E-01 | 4.76E-02 | 5.47E-01 |
| 813.54835 | 275.78 | 19.03 | 18.27 | 18.04 | 18.32 | 2.03E-02 | 1.04E-01 | 1.50E-02 | 1.62E-01 | 9.01E-01 | 9.99E-01 | 8.46E-01 |
| 813.58491 | 211.94 | 17.09 | 17.07 | 16.86 | 16.45 | 1.01E-02 | 9.99E-01 | 6.33E-01 | 1.07E-02 | 7.39E-01 | 2.07E-02 | 2.14E-01 |
| 813.70932 | 48.7   | 11.99 | 12.78 | 12.82 | 13.20 | 3.62E-07 | 8.75E-04 | 3.25E-04 | 1.86E-07 | 9.97E-01 | 2.18E-01 | 3.06E-01 |
| 814.47521 | 214.4  | 13.49 | 14.93 | 14.62 | 13.33 | 3.32E-04 | 4.85E-03 | 4.11E-02 | 9.82E-01 | 8.89E-01 | 2.51E-03 | 2.17E-02 |
| 814.50089 | 195.24 | 10.11 | 11.97 | 13.02 | 13.05 | 4.24E-06 | 1.49E-02 | 1.91E-05 | 3.40E-05 | 3.38E-01 | 3.49E-01 | 1.00E+00 |
| 814.5608  | 258.31 | 19.97 | 19.48 | 19.47 | 18.65 | 2.19E-05 | 2.16E-01 | 1.99E-01 | 4.07E-06 | 1.00E+00 | 1.03E-02 | 1.02E-02 |
| 814.59455 | 197.43 | 15.27 | 14.80 | 14.87 | 14.44 | 1.90E-03 | 1.04E-01 | 1.88E-01 | 6.09E-04 | 9.91E-01 | 3.41E-01 | 2.02E-01 |
| 814.71635 | 41.4   | 12.24 | 13.30 | 13.10 | 13.47 | 4.59E-07 | 2.53E-05 | 7.74E-04 | 1.24E-06 | 8.31E-01 | 8.78E-01 | 3.92E-01 |
| 814.72562 | 47.43  | 13.76 | 15.51 | 15.21 | 15.26 | 1.46E-23 | 3.49E-14 | 4.29E-14 | 4.37E-14 | 2.63E-01 | 4.75E-01 | 9.88E-01 |
| 815.48653 | 220.53 | 20.12 | 20.75 | 20.94 | 20.19 | 8.40E-08 | 4.24E-04 | 1.69E-06 | 9.79E-01 | 6.38E-01 | 3.76E-03 | 3.68E-05 |
| 815.56371 | 248.43 | 18.03 | 16.83 | 17.00 | 16.77 | 5.31E-05 | 3.99E-04 | 2.96E-03 | 2.53E-04 | 9.43E-01 | 9.97E-01 | 8.72E-01 |
| 816.49036 | 225.65 | 19.03 | 19.65 | 19.83 | 19.06 | 2.82E-07 | 1.03E-03 | 6.82E-06 | 9.98E-01 | 6.75E-01 | 3.85E-03 | 4.88E-05 |
| 816.52223 | 269.8  | 13.06 | 13.87 | 13.44 | 14.67 | 1.29E-02 | 3.44E-01 | 8.58E-01 | 7.52E-03 | 8.23E-01 | 3.97E-01 | 7.49E-02 |
| 816.53299 | 281.53 | 16.55 | 16.50 | 15.93 | 15.91 | 3.83E-02 | 9.98E-01 | 1.27E-01 | 1.23E-01 | 2.07E-01 | 1.97E-01 | 1.00E+00 |

|           |        |       |       |       |       |          |          |          |          |          |          |          |
|-----------|--------|-------|-------|-------|-------|----------|----------|----------|----------|----------|----------|----------|
| 816.57654 | 255.85 | 23.04 | 22.44 | 22.25 | 21.69 | 1.67E-09 | 9.19E-03 | 1.90E-04 | 2.36E-10 | 7.46E-01 | 1.25E-03 | 2.78E-02 |
| 816.72045 | 46.46  | 13.27 | 14.30 | 14.04 | 14.32 | 1.05E-18 | 4.50E-14 | 7.30E-10 | 4.46E-14 | 1.34E-01 | 9.99E-01 | 1.10E-01 |
| 817.48612 | 223.04 | 14.64 | 14.57 | 15.10 | 14.23 | 1.21E-01 | 9.97E-01 | 5.31E-01 | 6.50E-01 | 4.27E-01 | 7.88E-01 | 7.58E-02 |
| 817.50319 | 229.42 | 23.59 | 24.18 | 24.47 | 24.07 | 1.65E-07 | 4.69E-04 | 3.59E-08 | 8.63E-03 | 2.13E-01 | 8.98E-01 | 4.86E-02 |
| 817.57989 | 256.8  | 22.27 | 21.54 | 21.24 | 20.80 | 1.66E-12 | 4.60E-04 | 1.83E-07 | 7.98E-13 | 3.61E-01 | 7.88E-04 | 9.70E-02 |
| 818.50657 | 228.27 | 22.51 | 23.11 | 23.41 | 22.97 | 9.97E-08 | 4.39E-04 | 2.01E-08 | 1.36E-02 | 1.80E-01 | 8.27E-01 | 2.48E-02 |
| 818.55427 | 205.88 | 17.04 | 16.36 | 16.36 | 16.22 | 1.33E-02 | 6.00E-02 | 5.59E-02 | 1.87E-02 | 1.00E+00 | 9.64E-01 | 9.64E-01 |
| 818.59016 | 257.78 | 22.33 | 21.16 | 20.98 | 20.79 | 3.53E-17 | 5.49E-10 | 6.95E-13 | 4.57E-14 | 7.35E-01 | 1.71E-01 | 7.07E-01 |
| 818.75717 | 47.97  | 12.32 | 14.10 | 14.27 | 14.25 | 8.10E-16 | 5.94E-11 | 6.97E-13 | 5.04E-12 | 9.15E-01 | 9.39E-01 | 1.00E+00 |
| 818.88325 | 60.47  | 12.64 | 12.67 | 10.58 | 11.44 | 5.39E-44 | 9.98E-01 | 5.11E-15 | 4.26E-14 | 5.11E-15 | 4.64E-14 | 1.08E-08 |
| 819.51638 | 253.17 | 23.30 | 24.53 | 25.13 | 24.42 | 3.07E-09 | 6.21E-05 | 6.72E-10 | 5.22E-04 | 1.38E-01 | 9.79E-01 | 6.21E-02 |
| 819.5953  | 257.8  | 20.73 | 19.88 | 19.83 | 18.96 | 5.78E-11 | 1.19E-03 | 3.99E-04 | 4.08E-12 | 9.95E-01 | 8.75E-04 | 1.85E-03 |
| 820.01951 | 20.86  | 10.93 | 12.68 | 12.17 | 12.03 | 6.80E-07 | 2.66E-07 | 3.93E-04 | 3.29E-03 | 3.73E-01 | 1.97E-01 | 9.74E-01 |
| 820.52022 | 253.99 | 22.06 | 23.52 | 23.98 | 23.45 | 1.47E-12 | 1.02E-07 | 1.72E-12 | 7.93E-07 | 2.69E-01 | 9.95E-01 | 1.84E-01 |
| 820.56025 | 214.85 | 16.97 | 16.65 | 16.71 | 17.62 | 1.75E-03 | 5.91E-01 | 7.33E-01 | 6.67E-02 | 9.96E-01 | 2.22E-03 | 4.39E-03 |
| 820.59869 | 289.08 | 16.63 | 15.06 | 15.50 | 14.60 | 5.36E-10 | 1.01E-06 | 6.38E-04 | 5.85E-10 | 4.55E-01 | 4.45E-01 | 1.88E-02 |
| 820.69591 | 53.7   | 15.43 | 15.33 | 15.95 | 16.01 | 7.06E-07 | 8.92E-01 | 1.47E-03 | 4.84E-04 | 1.48E-04 | 4.70E-05 | 9.76E-01 |
| 820.71632 | 50.96  | 13.66 | 15.33 | 15.71 | 15.49 | 2.86E-26 | 4.22E-14 | 1.47E-14 | 4.11E-14 | 1.71E-01 | 8.33E-01 | 6.56E-01 |
| 820.75726 | 40.65  | 13.13 | 13.28 | 12.86 | 13.39 | 7.35E-03 | 7.60E-01 | 2.88E-01 | 3.40E-01 | 3.86E-02 | 8.98E-01 | 5.69E-03 |
| 821.2912  | 64.78  | 12.31 | 12.98 | 10.15 | 10.85 | 8.93E-49 | 1.26E-04 | 5.11E-15 | 4.29E-14 | 5.11E-15 | 5.11E-15 | 1.27E-04 |
| 821.53058 | 266.45 | 22.88 | 24.09 | 24.29 | 23.99 | 1.08E-04 | 1.86E-03 | 1.53E-04 | 7.05E-03 | 9.34E-01 | 9.92E-01 | 8.20E-01 |
| 822.53466 | 263.92 | 22.55 | 23.28 | 23.36 | 22.87 | 2.01E-02 | 5.99E-02 | 2.51E-02 | 6.98E-01 | 9.91E-01 | 5.45E-01 | 3.66E-01 |
| 822.56765 | 229.34 | 20.90 | 18.21 | 18.88 | 18.32 | 2.46E-39 | 5.11E-15 | 1.75E-14 | 5.11E-15 | 2.10E-03 | 9.46E-01 | 1.74E-02 |
| 822.65333 | 48.46  | 16.60 | 17.36 | 18.45 | 18.07 | 9.31E-29 | 2.52E-06 | 5.11E-15 | 4.42E-14 | 2.71E-11 | 3.75E-05 | 6.61E-02 |
| 822.71103 | 50.53  | 12.46 | 12.79 | 12.96 | 13.11 | 1.11E-03 | 1.91E-01 | 1.21E-02 | 8.44E-04 | 7.28E-01 | 2.48E-01 | 8.22E-01 |
| 823.57001 | 232.36 | 19.77 | 16.37 | 16.66 | 16.37 | 2.51E-36 | 5.11E-15 | 5.77E-15 | 5.11E-15 | 6.88E-01 | 1.00E+00 | 7.02E-01 |
| 824.58146 | 244.49 | 19.13 | 17.66 | 17.27 | 17.75 | 6.89E-11 | 4.53E-07 | 1.13E-10 | 4.69E-06 | 4.87E-01 | 9.88E-01 | 3.16E-01 |
| 824.65115 | 56.11  | 16.14 | 16.54 | 17.69 | 17.21 | 4.33E-23 | 2.49E-02 | 2.60E-14 | 2.08E-11 | 6.21E-13 | 7.38E-05 | 7.29E-03 |
| 824.66197 | 48.32  | 13.88 | 12.55 | 13.67 | 14.29 | 6.42E-07 | 6.72E-05 | 8.93E-01 | 5.36E-01 | 1.48E-03 | 4.53E-07 | 1.94E-01 |
| 824.78609 | 44.69  | 13.03 | 13.65 | 13.34 | 13.74 | 2.23E-04 | 1.83E-03 | 2.52E-01 | 4.42E-04 | 2.85E-01 | 9.68E-01 | 1.26E-01 |
| 824.79551 | 40.19  | 11.88 | 12.80 | 12.58 | 12.91 | 3.39E-05 | 3.86E-04 | 1.00E-02 | 7.25E-05 | 7.90E-01 | 9.59E-01 | 4.96E-01 |
| 825.0567  | 63.65  | 10.92 | 12.57 | 9.53  | 10.24 | 1.39E-50 | 2.46E-14 | 4.40E-14 | 8.30E-05 | 5.11E-15 | 5.11E-15 | 5.38E-05 |
| 825.54882 | 253.6  | 19.38 | 19.16 | 18.88 | 18.44 | 7.87E-03 | 8.50E-01 | 2.56E-01 | 4.67E-03 | 7.51E-01 | 5.91E-02 | 3.96E-01 |
| 825.5851  | 234.58 | 17.96 | 15.72 | 15.45 | 15.93 | 5.39E-25 | 4.36E-14 | 2.38E-14 | 4.73E-14 | 6.54E-01 | 8.22E-01 | 1.90E-01 |
| 826.53642 | 276.26 | 17.63 | 13.74 | 13.05 | 13.49 | 3.34E-42 | 5.11E-15 | 5.11E-15 | 5.11E-15 | 9.04E-02 | 8.48E-01 | 4.57E-01 |
| 826.59825 | 245.71 | 16.00 | 18.83 | 18.49 | 18.40 | 1.16E-18 | 4.20E-14 | 2.18E-13 | 5.59E-12 | 7.01E-01 | 5.55E-01 | 9.93E-01 |
| 826.74748 | 46.48  | 14.78 | 18.35 | 18.19 | 18.18 | 1.49E-36 | 5.11E-15 | 5.11E-15 | 5.33E-15 | 9.39E-01 | 9.36E-01 | 1.00E+00 |
| 827.09256 | 20.61  | 10.77 | 12.29 | 12.49 | 12.00 | 2.17E-06 | 6.85E-05 | 4.03E-06 | 2.90E-03 | 9.41E-01 | 8.42E-01 | 5.07E-01 |
| 827.50573 | 288.26 | 13.95 | 14.30 | 15.14 | 14.72 | 6.54E-02 | 8.75E-01 | 4.80E-02 | 3.74E-01 | 2.81E-01 | 8.29E-01 | 8.12E-01 |
| 827.56349 | 243.19 | 21.50 | 20.96 | 20.76 | 19.92 | 3.21E-06 | 2.20E-01 | 3.83E-02 | 5.72E-07 | 8.88E-01 | 2.71E-03 | 2.34E-02 |
| 827.60113 | 236.33 | 14.93 | 18.16 | 17.82 | 17.25 | 8.68E-35 | 5.11E-15 | 5.33E-15 | 4.26E-14 | 4.76E-01 | 1.41E-03 | 8.95E-02 |
| 827.60994 | 239.11 | 13.87 | 14.51 | 14.11 | 14.68 | 1.28E-03 | 1.73E-02 | 6.58E-01 | 1.84E-03 | 2.80E-01 | 8.82E-01 | 6.41E-02 |
| 827.74719 | 46.64  | 12.62 | 12.85 | 12.79 | 13.16 | 1.44E-02 | 4.74E-01 | 6.91E-01 | 6.24E-03 | 9.85E-01 | 2.58E-01 | 1.28E-01 |
| 828.48261 | 240.76 | 14.89 | 15.44 | 16.22 | 15.27 | 4.64E-02 | 6.52E-01 | 2.63E-02 | 8.65E-01 | 3.78E-01 | 9.86E-01 | 2.25E-01 |
| 828.57287 | 252.26 | 21.50 | 21.09 | 21.13 | 20.95 | 1.35E-01 | 3.07E-01 | 4.03E-01 | 1.16E-01 | 9.98E-01 | 9.52E-01 | 8.91E-01 |



|           |        |       |       |       |       |          |          |          |          |          |          |          |
|-----------|--------|-------|-------|-------|-------|----------|----------|----------|----------|----------|----------|----------|
| 828.68129 | 50.27  | 13.45 | 14.48 | 14.07 | 14.36 | 8.11E-10 | 2.18E-09 | 5.06E-04 | 3.39E-07 | 5.44E-02 | 8.74E-01 | 3.10E-01 |
| 828.69089 | 43.61  | 11.78 | 12.99 | 12.53 | 13.43 | 4.28E-07 | 1.69E-04 | 4.02E-02 | 2.75E-07 | 3.86E-01 | 4.63E-01 | 1.46E-02 |
| 828.73265 | 40.8   | 12.21 | 12.53 | 12.15 | 12.99 | 1.87E-06 | 1.93E-01 | 9.81E-01 | 1.66E-05 | 9.52E-02 | 2.94E-02 | 4.80E-06 |
| 828.74533 | 46.59  | 13.55 | 14.85 | 14.65 | 14.94 | 2.53E-24 | 4.13E-14 | 5.02E-14 | 3.65E-14 | 4.63E-01 | 8.94E-01 | 1.44E-01 |
| 829.48728 | 229.45 | 14.67 | 13.72 | 14.11 | 13.43 | 5.85E-03 | 4.00E-02 | 3.86E-01 | 4.62E-03 | 7.05E-01 | 8.72E-01 | 2.69E-01 |
| 829.57923 | 248.79 | 19.56 | 19.90 | 19.40 | 19.32 | 2.69E-01 | 6.69E-01 | 9.50E-01 | 8.65E-01 | 3.63E-01 | 2.62E-01 | 9.94E-01 |
| 830.49767 | 275.51 | 21.26 | 18.52 | 19.93 | 18.61 | 1.68E-16 | 6.91E-14 | 2.87E-04 | 6.18E-13 | 1.75E-04 | 9.93E-01 | 7.93E-04 |
| 830.5919  | 249.96 | 21.37 | 20.80 | 20.87 | 20.94 | 3.05E-02 | 3.46E-02 | 7.56E-02 | 1.79E-01 | 9.89E-01 | 9.29E-01 | 9.90E-01 |
| 830.69551 | 49.8   | 12.66 | 14.19 | 14.19 | 14.06 | 1.95E-18 | 5.65E-14 | 5.13E-14 | 3.54E-12 | 1.00E+00 | 9.14E-01 | 9.03E-01 |
| 830.70515 | 42.99  | 12.83 | 13.80 | 13.51 | 13.84 | 9.16E-06 | 6.50E-05 | 9.12E-03 | 4.06E-05 | 5.49E-01 | 9.96E-01 | 4.33E-01 |
| 831.50173 | 286.49 | 19.94 | 17.80 | 19.34 | 16.95 | 2.27E-14 | 1.15E-07 | 3.57E-01 | 6.42E-13 | 3.07E-04 | 1.27E-01 | 1.34E-08 |
| 831.59563 | 251.06 | 20.11 | 19.55 | 19.23 | 19.41 | 8.38E-03 | 1.54E-01 | 5.90E-03 | 5.42E-02 | 6.58E-01 | 9.61E-01 | 9.23E-01 |
| 832.51237 | 243    | 20.13 | 19.09 | 19.62 | 19.31 | 8.01E-06 | 5.32E-06 | 6.55E-02 | 8.15E-04 | 5.58E-02 | 7.34E-01 | 4.71E-01 |
| 832.60269 | 286.96 | 16.04 | 15.78 | 15.45 | 15.90 | 5.63E-02 | 6.37E-01 | 3.64E-02 | 9.29E-01 | 4.59E-01 | 9.52E-01 | 2.04E-01 |
| 832.60318 | 230.45 | 18.50 | 17.11 | 16.85 | 17.40 | 3.68E-10 | 2.91E-07 | 6.90E-10 | 1.18E-04 | 7.30E-01 | 6.78E-01 | 1.45E-01 |
| 832.69768 | 48.75  | 13.43 | 13.86 | 13.70 | 14.04 | 2.77E-06 | 8.32E-04 | 7.69E-02 | 1.40E-06 | 4.74E-01 | 4.24E-01 | 1.86E-02 |
| 832.77491 | 36.34  | 12.12 | 14.10 | 12.71 | 13.69 | 2.46E-05 | 4.05E-05 | 5.05E-01 | 2.43E-03 | 9.55E-03 | 8.09E-01 | 1.30E-01 |
| 833.5184  | 242.4  | 21.16 | 21.64 | 21.70 | 21.33 | 1.10E-01 | 2.29E-01 | 1.31E-01 | 9.11E-01 | 9.94E-01 | 6.52E-01 | 4.90E-01 |
| 833.59742 | 199.51 | 13.79 | 13.35 | 13.27 | 13.42 | 2.43E-01 | 3.82E-01 | 2.30E-01 | 5.51E-01 | 9.92E-01 | 9.96E-01 | 9.58E-01 |
| 833.61062 | 204.6  | 16.67 | 15.15 | 14.90 | 15.51 | 8.56E-15 | 8.67E-11 | 9.33E-14 | 1.63E-06 | 6.80E-01 | 3.83E-01 | 3.74E-02 |
| 834.52641 | 242.13 | 24.35 | 21.61 | 21.39 | 22.66 | 3.79E-24 | 4.26E-14 | 2.93E-14 | 3.91E-08 | 8.60E-01 | 1.84E-03 | 8.01E-05 |
| 834.57218 | 216.31 | 16.00 | 16.13 | 15.98 | 15.74 | 7.18E-01 | 9.78E-01 | 1.00E+00 | 8.56E-01 | 9.68E-01 | 6.57E-01 | 8.92E-01 |
| 834.72645 | 43.64  | 10.81 | 12.63 | 12.48 | 12.59 | 2.22E-09 | 9.88E-08 | 9.77E-07 | 4.48E-07 | 9.61E-01 | 9.99E-01 | 9.87E-01 |
| 834.73622 | 50     | 12.37 | 13.33 | 13.58 | 13.68 | 1.92E-07 | 5.14E-04 | 4.35E-06 | 1.35E-06 | 7.27E-01 | 4.92E-01 | 9.76E-01 |
| 834.85632 | 53.18  | 13.06 | 12.85 | 11.18 | 11.73 | 1.23E-43 | 2.69E-01 | 5.11E-15 | 2.64E-14 | 5.11E-15 | 4.33E-14 | 8.25E-05 |
| 835.53152 | 248.88 | 23.66 | 21.60 | 21.36 | 22.31 | 2.57E-12 | 2.08E-09 | 1.61E-11 | 2.21E-04 | 8.77E-01 | 1.43E-01 | 2.17E-02 |
| 836.54108 | 275.42 | 22.85 | 22.09 | 21.74 | 21.90 | 1.05E-04 | 1.71E-02 | 1.03E-04 | 2.10E-03 | 5.34E-01 | 8.98E-01 | 9.28E-01 |
| 836.5805  | 233.8  | 16.66 | 16.00 | 15.91 | 15.42 | 3.77E-04 | 8.54E-02 | 3.52E-02 | 1.16E-04 | 9.89E-01 | 1.94E-01 | 3.25E-01 |
| 836.66176 | 56.2   | 12.27 | 10.60 | 11.79 | 12.19 | 1.83E-10 | 7.40E-10 | 2.05E-01 | 9.89E-01 | 2.52E-05 | 2.86E-08 | 4.11E-01 |
| 836.68459 | 46.5   | 13.10 | 12.73 | 13.47 | 13.39 | 1.12E-04 | 1.24E-01 | 1.19E-01 | 3.43E-01 | 1.32E-04 | 1.44E-03 | 9.65E-01 |
| 836.69594 | 53.15  | 13.97 | 15.10 | 15.62 | 15.50 | 7.54E-23 | 5.93E-11 | 3.82E-14 | 4.53E-14 | 7.07E-03 | 7.32E-02 | 8.89E-01 |
| 836.72682 | 47.55  | 11.97 | 13.54 | 13.10 | 13.53 | 4.54E-14 | 4.41E-12 | 4.69E-07 | 1.76E-11 | 1.64E-01 | 1.00E+00 | 1.94E-01 |
| 837.26008 | 65.2   | 12.81 | 13.24 | 10.53 | 11.32 | 7.06E-43 | 5.52E-02 | 5.11E-15 | 4.57E-14 | 5.11E-15 | 2.93E-14 | 6.98E-05 |
| 837.54694 | 270.74 | 21.54 | 20.81 | 20.86 | 20.97 | 3.43E-02 | 4.47E-02 | 6.89E-02 | 1.92E-01 | 9.98E-01 | 9.46E-01 | 9.82E-01 |
| 837.58547 | 290.16 | 14.06 | 14.82 | 14.21 | 13.03 | 1.56E-04 | 1.72E-01 | 9.75E-01 | 3.42E-02 | 3.77E-01 | 4.15E-05 | 1.26E-02 |
| 837.58641 | 214.72 | 16.32 | 16.00 | 16.22 | 15.51 | 2.01E-02 | 6.28E-01 | 9.81E-01 | 1.58E-02 | 8.54E-01 | 2.84E-01 | 5.11E-02 |
| 838.55833 | 249.88 | 21.41 | 20.24 | 20.51 | 20.39 | 7.63E-04 | 1.01E-03 | 1.87E-02 | 7.49E-03 | 8.15E-01 | 9.67E-01 | 9.80E-01 |
| 838.59665 | 230.79 | 17.36 | 17.43 | 17.56 | 16.74 | 1.10E-02 | 9.92E-01 | 8.49E-01 | 6.84E-02 | 9.57E-01 | 4.06E-02 | 8.90E-03 |
| 838.62693 | 49.84  | 15.01 | 14.70 | 17.10 | 16.68 | 2.94E-21 | 6.03E-01 | 9.84E-14 | 5.41E-09 | 4.25E-14 | 1.67E-11 | 3.78E-01 |
| 839.48657 | 218.65 | 20.31 | 20.96 | 21.31 | 20.62 | 4.95E-08 | 6.28E-04 | 2.47E-08 | 2.63E-01 | 1.61E-01 | 2.08E-01 | 4.86E-04 |
| 839.56325 | 253.45 | 20.55 | 19.43 | 19.56 | 19.21 | 3.18E-05 | 7.92E-04 | 3.61E-03 | 5.42E-05 | 9.71E-01 | 8.81E-01 | 6.41E-01 |
| 839.60002 | 214.63 | 16.53 | 16.03 | 16.02 | 15.34 | 1.86E-04 | 1.99E-01 | 1.73E-01 | 3.89E-05 | 1.00E+00 | 4.66E-02 | 5.01E-02 |
| 840.49007 | 218.93 | 19.32 | 19.95 | 20.30 | 19.55 | 6.60E-07 | 2.81E-03 | 5.64E-07 | 5.75E-01 | 2.31E-01 | 1.56E-01 | 5.58E-04 |
| 840.52384 | 284.27 | 12.76 | 14.33 | 14.02 | 13.75 | 1.20E-03 | 9.24E-04 | 1.10E-02 | 9.04E-02 | 8.84E-01 | 5.29E-01 | 9.15E-01 |
| 840.53297 | 293.15 | 14.35 | 15.37 | 15.07 | 14.78 | 3.42E-03 | 1.93E-03 | 4.84E-02 | 4.38E-01 | 7.26E-01 | 1.95E-01 | 7.55E-01 |

|           |        |       |       |       |       |          |          |          |          |          |          |          |
|-----------|--------|-------|-------|-------|-------|----------|----------|----------|----------|----------|----------|----------|
| 840.57585 | 256.84 | 22.59 | 22.19 | 21.92 | 21.28 | 8.58E-07 | 2.69E-01 | 1.48E-02 | 1.93E-07 | 6.55E-01 | 8.64E-04 | 3.15E-02 |
| 840.60887 | 197.79 | 13.89 | 13.37 | 13.43 | 13.14 | 8.71E-02 | 2.88E-01 | 3.84E-01 | 6.28E-02 | 9.97E-01 | 8.77E-01 | 7.82E-01 |
| 840.62403 | 58.04  | 12.73 | 12.59 | 15.36 | 14.13 | 4.74E-08 | 9.92E-01 | 1.04E-06 | 2.97E-02 | 5.78E-07 | 1.72E-02 | 8.33E-02 |
| 840.75284 | 40.89  | 12.13 | 12.35 | 12.13 | 12.53 | 8.47E-02 | 5.75E-01 | 1.00E+00 | 1.18E-01 | 5.85E-01 | 7.75E-01 | 1.27E-01 |
| 840.76262 | 46.48  | 13.52 | 14.04 | 13.74 | 14.22 | 4.01E-05 | 3.33E-03 | 4.41E-01 | 4.78E-05 | 2.07E-01 | 6.62E-01 | 1.30E-02 |
| 841.48619 | 223.58 | 14.57 | 14.96 | 16.10 | 14.20 | 6.37E-08 | 5.90E-01 | 6.58E-06 | 6.37E-01 | 1.97E-03 | 9.11E-02 | 7.80E-08 |
| 841.50096 | 225.2  | 22.10 | 22.78 | 22.96 | 22.36 | 7.78E-07 | 2.33E-04 | 1.72E-06 | 4.18E-01 | 7.31E-01 | 6.60E-02 | 3.06E-03 |
| 841.57936 | 258.16 | 21.60 | 21.44 | 21.01 | 20.64 | 6.73E-06 | 8.34E-01 | 1.11E-02 | 9.61E-06 | 1.26E-01 | 5.06E-04 | 2.38E-01 |
| 842.50745 | 221.46 | 21.09 | 21.79 | 21.95 | 21.35 | 6.95E-07 | 1.90E-04 | 1.72E-06 | 4.16E-01 | 7.60E-01 | 5.89E-02 | 3.10E-03 |
| 842.55433 | 201.68 | 16.34 | 16.86 | 16.40 | 16.08 | 4.87E-02 | 2.01E-01 | 9.95E-01 | 7.83E-01 | 3.23E-01 | 2.95E-02 | 6.62E-01 |
| 842.58885 | 259.72 | 20.81 | 20.73 | 20.43 | 19.65 | 2.66E-05 | 9.86E-01 | 4.02E-01 | 3.00E-05 | 6.37E-01 | 2.03E-04 | 1.14E-02 |
| 842.72087 | 47.95  | 15.20 | 17.82 | 17.75 | 17.63 | 8.73E-41 | 5.11E-15 | 5.11E-15 | 5.11E-15 | 9.77E-01 | 7.46E-01 | 9.26E-01 |
| 843.52689 | 233.86 | 21.87 | 22.04 | 22.01 | 21.62 | 2.15E-02 | 6.00E-01 | 7.31E-01 | 3.09E-01 | 9.96E-01 | 2.36E-02 | 3.96E-02 |
| 843.5947  | 252.81 | 18.42 | 18.12 | 17.57 | 17.46 | 1.72E-02 | 8.13E-01 | 5.58E-02 | 2.97E-02 | 3.78E-01 | 2.45E-01 | 9.89E-01 |
| 843.71823 | 47.99  | 11.00 | 12.36 | 12.39 | 12.35 | 2.48E-09 | 3.78E-07 | 1.54E-07 | 8.63E-07 | 9.99E-01 | 1.00E+00 | 9.99E-01 |
| 844.52894 | 228.97 | 20.83 | 20.87 | 20.72 | 20.42 | 1.32E-02 | 9.92E-01 | 8.49E-01 | 2.43E-02 | 7.14E-01 | 1.41E-02 | 1.80E-01 |
| 844.5683  | 201.24 | 15.37 | 15.74 | 15.76 | 15.42 | 1.65E-01 | 3.36E-01 | 2.64E-01 | 9.96E-01 | 9.99E-01 | 5.14E-01 | 4.31E-01 |
| 844.60686 | 255.65 | 20.19 | 19.69 | 19.45 | 18.98 | 9.39E-05 | 1.98E-01 | 1.80E-02 | 2.95E-05 | 7.89E-01 | 3.98E-02 | 2.80E-01 |
| 844.65798 | 55.11  | 14.19 | 14.34 | 14.76 | 14.80 | 5.59E-04 | 8.03E-01 | 4.40E-03 | 3.01E-03 | 7.68E-02 | 5.38E-02 | 9.96E-01 |
| 844.66626 | 47.66  | 12.35 | 11.83 | 12.65 | 12.71 | 2.28E-03 | 1.43E-01 | 5.87E-01 | 4.65E-01 | 5.63E-03 | 3.74E-03 | 9.96E-01 |
| 844.70593 | 41.72  | 10.89 | 12.43 | 12.14 | 12.66 | 3.18E-14 | 1.18E-10 | 1.34E-07 | 7.49E-13 | 5.65E-01 | 7.52E-01 | 1.08E-01 |
| 844.71896 | 48.14  | 13.72 | 15.08 | 14.95 | 15.08 | 4.87E-32 | 6.00E-15 | 2.22E-14 | 7.33E-15 | 6.54E-01 | 1.00E+00 | 6.24E-01 |
| 845.53068 | 232.49 | 20.22 | 20.50 | 20.34 | 19.52 | 7.14E-06 | 4.33E-01 | 9.18E-01 | 1.51E-03 | 8.27E-01 | 5.84E-06 | 1.89E-04 |
| 845.56665 | 287.79 | 12.47 | 12.71 | 12.84 | 11.98 | 4.53E-01 | 9.72E-01 | 8.99E-01 | 8.07E-01 | 9.95E-01 | 5.73E-01 | 4.17E-01 |
| 845.5718  | 197.3  | 13.99 | 13.91 | 13.98 | 13.13 | 7.72E-03 | 9.91E-01 | 1.00E+00 | 1.18E-02 | 9.96E-01 | 3.44E-02 | 1.72E-02 |
| 845.61048 | 248.85 | 18.56 | 17.32 | 17.11 | 16.91 | 8.63E-07 | 5.54E-04 | 2.89E-05 | 3.46E-06 | 9.14E-01 | 6.01E-01 | 9.28E-01 |
| 846.54201 | 234.96 | 18.91 | 18.87 | 18.79 | 17.99 | 1.59E-05 | 9.95E-01 | 9.10E-01 | 3.37E-05 | 9.76E-01 | 1.50E-04 | 6.50E-04 |
| 846.56383 | 229.72 | 11.47 | 15.06 | 16.01 | 14.89 | 4.20E-23 | 5.03E-14 | 2.64E-14 | 3.57E-13 | 1.15E-01 | 9.80E-01 | 5.07E-02 |
| 846.57985 | 221.07 | 16.24 | 17.10 | 17.81 | 17.33 | 6.58E-11 | 3.92E-04 | 1.34E-11 | 7.86E-06 | 7.43E-03 | 7.57E-01 | 1.36E-01 |
| 846.61776 | 291.16 | 15.92 | 14.89 | 14.65 | 14.85 | 3.16E-04 | 7.12E-03 | 4.18E-04 | 6.32E-03 | 8.82E-01 | 9.99E-01 | 9.31E-01 |
| 846.67289 | 53.92  | 13.28 | 15.27 | 15.45 | 15.22 | 2.55E-18 | 2.47E-13 | 4.46E-14 | 3.05E-12 | 8.94E-01 | 9.96E-01 | 7.98E-01 |
| 846.68265 | 46.55  | 10.58 | 12.98 | 13.13 | 12.40 | 2.53E-09 | 1.70E-07 | 1.89E-08 | 1.74E-04 | 9.85E-01 | 5.57E-01 | 3.45E-01 |
| 847.54973 | 250.37 | 18.92 | 18.74 | 18.77 | 17.73 | 2.60E-06 | 8.44E-01 | 8.99E-01 | 3.32E-06 | 9.99E-01 | 1.95E-04 | 9.81E-05 |
| 847.56798 | 225.44 | 13.66 | 14.08 | 15.64 | 14.83 | 6.25E-13 | 3.36E-01 | 8.60E-13 | 6.79E-05 | 4.38E-08 | 3.05E-02 | 1.26E-02 |
| 847.5879  | 206.02 | 14.59 | 16.17 | 15.89 | 15.98 | 4.96E-10 | 4.37E-09 | 1.34E-06 | 5.57E-07 | 6.75E-01 | 8.83E-01 | 9.85E-01 |
| 848.47785 | 193.15 | 13.14 | 12.23 | 12.09 | 12.36 | 1.47E-04 | 1.84E-03 | 1.97E-04 | 1.34E-02 | 9.52E-01 | 9.61E-01 | 7.43E-01 |
| 848.49429 | 191.82 | 11.76 | 12.36 | 12.06 | 11.92 | 3.15E-01 | 2.51E-01 | 7.89E-01 | 9.63E-01 | 7.97E-01 | 5.70E-01 | 9.77E-01 |
| 848.54555 | 269.81 | 17.01 | 16.51 | 16.78 | 16.79 | 1.49E-01 | 9.01E-02 | 6.90E-01 | 7.42E-01 | 6.05E-01 | 6.00E-01 | 1.00E+00 |
| 848.59013 | 214.97 | 17.77 | 16.17 | 15.86 | 15.54 | 5.28E-20 | 6.21E-11 | 5.13E-14 | 4.11E-14 | 5.25E-01 | 4.32E-02 | 5.40E-01 |
| 848.67168 | 53.52  | 12.13 | 13.53 | 13.75 | 13.76 | 4.12E-16 | 3.10E-10 | 2.99E-13 | 1.05E-12 | 7.06E-01 | 6.92E-01 | 1.00E+00 |
| 848.73643 | 44.24  | 10.96 | 12.39 | 12.00 | 12.55 | 1.76E-08 | 9.90E-07 | 5.41E-04 | 9.87E-08 | 4.78E-01 | 9.39E-01 | 1.97E-01 |
| 848.75299 | 38.17  | 12.38 | 13.57 | 13.13 | 13.54 | 3.53E-07 | 1.91E-06 | 4.85E-03 | 5.95E-06 | 2.34E-01 | 1.00E+00 | 3.04E-01 |
| 849.48364 | 194.54 | 12.84 | 11.44 | 12.37 | 12.12 | 9.77E-05 | 2.66E-05 | 3.84E-01 | 9.01E-02 | 1.31E-02 | 1.34E-01 | 8.57E-01 |
| 849.54408 | 206.98 | 16.78 | 15.25 | 15.71 | 15.64 | 7.78E-07 | 4.89E-07 | 7.06E-04 | 4.53E-04 | 3.57E-01 | 5.35E-01 | 9.95E-01 |
| 849.57406 | 244.76 | 14.68 | 15.01 | 14.92 | 14.47 | 6.38E-01 | 8.69E-01 | 9.42E-01 | 9.67E-01 | 9.97E-01 | 6.40E-01 | 7.54E-01 |

|           |        |       |       |       |       |          |          |          |          |          |          |          |
|-----------|--------|-------|-------|-------|-------|----------|----------|----------|----------|----------|----------|----------|
| 849.58642 | 235.85 | 14.84 | 14.47 | 14.84 | 14.40 | 2.14E-01 | 4.98E-01 | 1.00E+00 | 3.55E-01 | 5.12E-01 | 9.93E-01 | 3.70E-01 |
| 850.55991 | 241.41 | 21.79 | 21.11 | 21.20 | 19.94 | 7.58E-09 | 5.59E-02 | 1.23E-01 | 9.92E-10 | 9.86E-01 | 3.23E-04 | 6.93E-05 |
| 850.59836 | 236.26 | 15.61 | 17.26 | 17.22 | 17.36 | 2.20E-11 | 1.25E-08 | 2.53E-08 | 4.45E-09 | 9.98E-01 | 9.87E-01 | 9.54E-01 |
| 850.60786 | 228.52 | 13.97 | 14.15 | 13.88 | 14.33 | 5.75E-01 | 9.49E-01 | 9.92E-01 | 7.14E-01 | 8.51E-01 | 9.54E-01 | 5.57E-01 |
| 850.71095 | 53.27  | 11.77 | 12.44 | 12.61 | 12.84 | 2.75E-04 | 3.83E-02 | 4.20E-03 | 2.38E-04 | 9.05E-01 | 4.25E-01 | 8.19E-01 |
| 850.71423 | 53.31  | 11.89 | 12.59 | 12.54 | 12.56 | 2.20E-02 | 4.17E-02 | 6.52E-02 | 6.35E-02 | 9.97E-01 | 1.00E+00 | 1.00E+00 |
| 850.83459 | 62.01  | 11.81 | 12.50 | 9.98  | 10.62 | 2.20E-51 | 1.21E-06 | 5.11E-15 | 4.33E-14 | 5.11E-15 | 5.11E-15 | 2.50E-05 |
| 851.56367 | 251.8  | 20.94 | 21.06 | 21.53 | 20.33 | 5.08E-03 | 9.83E-01 | 2.36E-01 | 2.26E-01 | 4.56E-01 | 1.24E-01 | 1.77E-03 |
| 852.48209 | 220.95 | 12.25 | 13.35 | 13.92 | 13.72 | 3.06E-02 | 2.61E-01 | 2.90E-02 | 8.54E-02 | 7.97E-01 | 9.40E-01 | 9.89E-01 |
| 852.53889 | 278.96 | 15.06 | 15.55 | 15.65 | 14.79 | 8.28E-02 | 5.28E-01 | 3.59E-01 | 8.90E-01 | 9.94E-01 | 1.98E-01 | 1.12E-01 |
| 852.56311 | 256.6  | 22.27 | 20.59 | 20.63 | 20.37 | 4.23E-28 | 3.95E-14 | 4.05E-14 | 1.27E-14 | 9.95E-01 | 5.42E-01 | 3.88E-01 |
| 852.61089 | 253.58 | 15.14 | 16.01 | 15.72 | 14.53 | 2.17E-08 | 1.21E-03 | 6.08E-02 | 5.45E-02 | 5.94E-01 | 3.55E-08 | 1.17E-05 |
| 853.49139 | 218.89 | 13.35 | 13.50 | 14.22 | 14.09 | 4.14E-02 | 9.71E-01 | 6.67E-02 | 1.74E-01 | 2.02E-01 | 3.95E-01 | 9.87E-01 |
| 853.5486  | 279.61 | 17.84 | 15.72 | 16.17 | 15.53 | 6.26E-19 | 5.08E-14 | 4.02E-10 | 4.11E-14 | 2.73E-01 | 8.76E-01 | 5.98E-02 |
| 853.57168 | 255.03 | 21.14 | 19.62 | 19.90 | 19.22 | 4.93E-20 | 1.49E-13 | 6.50E-10 | 4.14E-14 | 4.56E-01 | 1.86E-01 | 3.52E-03 |
| 853.61547 | 237.35 | 12.16 | 12.25 | 13.64 | 10.95 | 1.98E-03 | 9.99E-01 | 9.98E-02 | 2.76E-01 | 1.57E-01 | 2.36E-01 | 6.04E-04 |
| 854.49814 | 252.51 | 20.49 | 20.37 | 19.52 | 19.05 | 3.96E-06 | 9.75E-01 | 5.77E-03 | 2.25E-05 | 2.73E-02 | 2.12E-04 | 4.34E-01 |
| 854.55992 | 281.68 | 17.15 | 12.66 | 12.67 | 12.69 | 6.70E-35 | 5.33E-15 | 5.11E-15 | 6.00E-15 | 1.00E+00 | 1.00E+00 | 1.00E+00 |
| 854.59156 | 248.27 | 21.69 | 21.06 | 21.13 | 20.69 | 8.89E-05 | 1.33E-02 | 3.46E-02 | 2.89E-05 | 9.85E-01 | 3.48E-01 | 1.86E-01 |
| 855.50234 | 242.68 | 20.56 | 21.13 | 20.68 | 19.71 | 1.04E-09 | 1.79E-02 | 9.29E-01 | 1.28E-04 | 9.92E-02 | 1.58E-10 | 1.49E-05 |
| 855.59522 | 252.08 | 20.18 | 20.17 | 19.90 | 19.29 | 1.78E-03 | 1.00E+00 | 6.56E-01 | 2.33E-03 | 7.12E-01 | 3.96E-03 | 7.56E-02 |
| 855.66003 | 202.03 | 16.79 | 14.88 | 14.77 | 16.19 | 1.27E-10 | 8.05E-08 | 8.36E-09 | 2.80E-01 | 9.84E-01 | 8.81E-04 | 1.98E-04 |
| 856.50722 | 234.43 | 19.49 | 19.90 | 20.08 | 18.83 | 1.28E-09 | 1.08E-01 | 5.70E-03 | 2.96E-03 | 7.48E-01 | 4.36E-07 | 1.84E-09 |
| 856.6026  | 236.43 | 17.76 | 16.62 | 16.55 | 16.98 | 2.68E-05 | 2.19E-04 | 5.81E-05 | 2.66E-02 | 9.93E-01 | 6.00E-01 | 4.29E-01 |
| 856.66373 | 199.51 | 15.17 | 12.97 | 12.94 | 14.34 | 1.54E-13 | 1.03E-10 | 4.37E-11 | 4.96E-02 | 1.00E+00 | 2.19E-04 | 1.40E-04 |
| 856.73344 | 47.7   | 13.19 | 13.95 | 13.74 | 14.00 | 2.76E-06 | 3.24E-05 | 4.25E-03 | 1.20E-05 | 5.93E-01 | 9.87E-01 | 4.05E-01 |
| 857.51757 | 249.57 | 22.94 | 24.21 | 23.91 | 24.02 | 2.51E-11 | 1.34E-10 | 7.62E-07 | 1.02E-07 | 3.74E-01 | 7.55E-01 | 9.40E-01 |
| 857.61161 | 203.83 | 16.29 | 15.56 | 15.65 | 15.65 | 7.17E-02 | 9.13E-02 | 1.62E-01 | 1.82E-01 | 9.93E-01 | 9.94E-01 | 1.00E+00 |
| 858.52294 | 247.93 | 22.04 | 23.00 | 22.80 | 22.94 | 2.79E-08 | 2.03E-07 | 5.03E-05 | 2.57E-06 | 6.38E-01 | 9.84E-01 | 8.57E-01 |
| 858.68976 | 49.93  | 15.02 | 17.98 | 18.14 | 17.80 | 1.67E-27 | 3.35E-14 | 1.64E-14 | 4.29E-14 | 9.40E-01 | 9.27E-01 | 6.40E-01 |
| 859.52776 | 255.03 | 22.25 | 21.50 | 21.63 | 21.44 | 4.00E-05 | 3.19E-04 | 3.98E-03 | 1.58E-04 | 8.97E-01 | 9.93E-01 | 7.74E-01 |
| 860.49822 | 200.08 | 11.88 | 14.12 | 14.73 | 13.21 | 6.99E-11 | 4.14E-07 | 7.32E-11 | 7.83E-03 | 4.53E-01 | 1.40E-01 | 2.11E-03 |
| 860.53023 | 245.82 | 20.87 | 19.09 | 19.83 | 19.37 | 1.04E-10 | 1.94E-10 | 2.72E-04 | 1.69E-07 | 2.69E-02 | 7.36E-01 | 3.18E-01 |
| 860.62875 | 58.39  | 13.37 | 13.17 | 14.69 | 13.79 | 6.18E-10 | 8.08E-01 | 8.13E-08 | 2.68E-01 | 1.78E-09 | 4.66E-02 | 1.05E-03 |
| 860.67795 | 52.06  | 9.36  | 12.18 | 12.12 | 12.12 | 1.86E-15 | 4.13E-12 | 6.77E-12 | 3.46E-11 | 9.99E-01 | 9.99E-01 | 1.00E+00 |
| 860.68123 | 43.76  | 10.21 | 12.40 | 12.55 | 12.48 | 5.97E-13 | 2.46E-09 | 1.20E-10 | 1.62E-09 | 9.69E-01 | 9.95E-01 | 9.97E-01 |
| 860.69624 | 49.71  | 13.35 | 16.41 | 16.54 | 16.16 | 8.78E-18 | 1.40E-13 | 5.11E-14 | 1.95E-11 | 9.88E-01 | 9.21E-01 | 7.72E-01 |
| 861.54695 | 284.63 | 22.63 | 20.07 | 21.12 | 20.49 | 3.82E-14 | 1.43E-13 | 1.05E-05 | 9.90E-10 | 6.20E-03 | 5.79E-01 | 2.19E-01 |
| 862.55589 | 290.16 | 21.03 | 19.28 | 19.95 | 19.23 | 2.11E-07 | 2.35E-06 | 7.26E-03 | 2.04E-06 | 2.02E-01 | 9.99E-01 | 1.62E-01 |
| 863.55737 | 291.57 | 19.05 | 16.05 | 17.19 | 16.58 | 1.44E-14 | 7.73E-14 | 2.13E-06 | 7.68E-10 | 1.05E-02 | 5.04E-01 | 3.52E-01 |
| 864.53316 | 185.26 | 13.03 | 14.32 | 15.58 | 13.73 | 4.53E-30 | 3.73E-10 | 5.11E-15 | 2.15E-03 | 1.56E-09 | 1.54E-02 | 4.11E-14 |
| 864.57604 | 256.8  | 21.30 | 20.98 | 21.02 | 20.45 | 1.37E-02 | 5.88E-01 | 6.69E-01 | 5.83E-03 | 9.99E-01 | 1.80E-01 | 1.32E-01 |
| 864.61172 | 198.89 | 12.93 | 13.60 | 12.89 | 12.10 | 1.84E-03 | 2.40E-01 | 9.99E-01 | 1.08E-01 | 2.05E-01 | 5.17E-04 | 1.54E-01 |
| 864.71425 | 39.93  | 11.85 | 13.01 | 12.69 | 13.07 | 1.36E-10 | 8.25E-09 | 4.30E-05 | 3.94E-09 | 3.06E-01 | 9.92E-01 | 1.96E-01 |
| 864.72448 | 45.25  | 13.40 | 14.39 | 13.72 | 14.22 | 4.11E-12 | 4.03E-11 | 8.41E-02 | 9.71E-08 | 1.72E-05 | 6.45E-01 | 3.12E-03 |

|           |        |       |       |       |       |          |          |          |          |          |          |          |
|-----------|--------|-------|-------|-------|-------|----------|----------|----------|----------|----------|----------|----------|
| 865.48877 | 227.97 | 18.07 | 17.81 | 18.71 | 18.18 | 7.16E-04 | 6.18E-01 | 1.49E-02 | 9.56E-01 | 3.09E-04 | 3.53E-01 | 8.88E-02 |
| 865.50221 | 223.72 | 23.05 | 23.55 | 24.12 | 23.80 | 8.20E-08 | 2.72E-02 | 2.41E-08 | 2.85E-04 | 8.68E-03 | 5.24E-01 | 3.04E-01 |
| 865.57938 | 258.32 | 20.15 | 20.39 | 20.39 | 19.69 | 4.31E-02 | 7.97E-01 | 7.91E-01 | 3.18E-01 | 1.00E+00 | 5.72E-02 | 5.38E-02 |
| 866.49152 | 228.81 | 15.99 | 16.95 | 17.52 | 16.01 | 3.09E-08 | 3.71E-03 | 4.47E-07 | 1.00E+00 | 1.83E-01 | 8.28E-03 | 2.59E-06 |
| 866.50563 | 223.69 | 22.12 | 22.59 | 23.14 | 22.84 | 1.20E-07 | 3.05E-02 | 3.62E-08 | 3.34E-04 | 9.70E-03 | 5.25E-01 | 3.22E-01 |
| 866.5557  | 196.61 | 14.85 | 15.27 | 15.93 | 14.77 | 6.70E-05 | 3.73E-01 | 2.64E-04 | 9.90E-01 | 6.94E-02 | 2.65E-01 | 1.93E-04 |
| 866.58983 | 259.32 | 20.30 | 20.46 | 20.28 | 19.38 | 1.10E-04 | 9.02E-01 | 1.00E+00 | 1.21E-03 | 8.73E-01 | 1.41E-04 | 2.11E-03 |
| 867.49871 | 228.4  | 15.97 | 14.63 | 16.26 | 16.26 | 5.56E-06 | 5.97E-04 | 8.22E-01 | 8.41E-01 | 2.52E-05 | 5.16E-05 | 1.00E+00 |
| 867.52415 | 237.96 | 22.28 | 22.69 | 22.90 | 22.45 | 1.87E-04 | 2.36E-02 | 1.36E-04 | 6.78E-01 | 5.06E-01 | 3.66E-01 | 1.60E-02 |
| 867.59489 | 250.34 | 18.22 | 18.58 | 18.36 | 17.19 | 1.06E-05 | 5.53E-01 | 9.57E-01 | 1.18E-03 | 8.56E-01 | 1.00E-05 | 2.41E-04 |
| 868.52568 | 229.03 | 21.07 | 21.58 | 21.70 | 21.11 | 2.13E-05 | 4.89E-03 | 2.18E-04 | 9.95E-01 | 8.62E-01 | 1.76E-02 | 1.27E-03 |
| 868.57084 | 194.2  | 14.34 | 15.12 | 15.30 | 14.37 | 5.28E-04 | 2.65E-02 | 3.14E-03 | 1.00E+00 | 9.22E-01 | 5.24E-02 | 8.30E-03 |
| 868.607   | 257.07 | 20.69 | 20.24 | 20.04 | 19.21 | 1.66E-08 | 1.72E-01 | 1.75E-02 | 2.44E-09 | 8.22E-01 | 9.01E-05 | 2.10E-03 |
| 869.53677 | 240.45 | 21.87 | 21.42 | 21.42 | 21.22 | 3.04E-06 | 1.40E-03 | 1.02E-03 | 1.95E-06 | 1.00E+00 | 3.85E-01 | 4.04E-01 |
| 869.61072 | 256.28 | 18.71 | 18.41 | 18.11 | 16.80 | 1.12E-07 | 7.75E-01 | 2.14E-01 | 6.56E-08 | 7.79E-01 | 1.24E-05 | 5.20E-04 |
| 870.51743 | 232.73 | 11.14 | 12.00 | 11.95 | 12.09 | 5.78E-02 | 1.26E-01 | 1.58E-01 | 8.23E-02 | 9.99E-01 | 9.95E-01 | 9.84E-01 |
| 870.54208 | 237.14 | 20.85 | 20.23 | 20.06 | 19.97 | 7.59E-11 | 1.55E-05 | 1.73E-08 | 9.30E-10 | 5.75E-01 | 2.06E-01 | 8.86E-01 |
| 870.56896 | 274.1  | 16.85 | 16.54 | 15.05 | 16.18 | 1.14E-09 | 6.58E-01 | 8.06E-10 | 7.77E-02 | 9.37E-07 | 5.92E-01 | 4.62E-04 |
| 870.58565 | 209.76 | 15.77 | 16.30 | 16.11 | 15.19 | 6.97E-04 | 1.86E-01 | 5.45E-01 | 1.51E-01 | 9.03E-01 | 5.63E-04 | 5.47E-03 |
| 870.61939 | 292.92 | 16.56 | 15.04 | 14.75 | 15.06 | 6.39E-17 | 2.11E-11 | 4.34E-14 | 1.05E-10 | 5.08E-01 | 1.00E+00 | 4.79E-01 |
| 870.63149 | 213.41 | 14.12 | 12.40 | 12.27 | 12.91 | 5.78E-04 | 2.66E-03 | 8.75E-04 | 7.61E-02 | 9.93E-01 | 7.45E-01 | 5.80E-01 |
| 871.54707 | 240.65 | 20.20 | 18.62 | 18.09 | 19.42 | 1.58E-22 | 1.87E-13 | 2.84E-14 | 7.57E-04 | 4.29E-02 | 5.78E-04 | 2.05E-09 |
| 871.58883 | 197.75 | 13.80 | 15.06 | 15.08 | 14.64 | 1.10E-04 | 4.36E-04 | 3.06E-04 | 4.79E-02 | 1.00E+00 | 5.70E-01 | 5.32E-01 |
| 872.48701 | 194.72 | 13.44 | 14.34 | 14.21 | 14.11 | 2.06E-04 | 2.78E-04 | 2.29E-03 | 1.52E-02 | 9.38E-01 | 7.49E-01 | 9.71E-01 |
| 872.545   | 266.26 | 18.03 | 16.39 | 15.67 | 17.48 | 2.18E-16 | 2.56E-08 | 4.29E-14 | 1.90E-01 | 4.64E-02 | 8.81E-04 | 4.50E-09 |
| 872.7068  | 50.03  | 12.18 | 12.93 | 13.03 | 12.85 | 6.95E-02 | 1.48E-01 | 7.52E-02 | 2.52E-01 | 9.93E-01 | 9.97E-01 | 9.63E-01 |
| 872.73098 | 47.42  | 11.85 | 13.08 | 13.02 | 12.97 | 2.30E-06 | 2.24E-05 | 4.68E-05 | 2.08E-04 | 9.97E-01 | 9.80E-01 | 9.97E-01 |
| 873.56799 | 202.45 | 15.45 | 13.65 | 13.37 | 13.83 | 4.54E-17 | 4.04E-12 | 4.37E-14 | 9.19E-10 | 6.27E-01 | 8.96E-01 | 2.39E-01 |
| 874.51566 | 209.95 | 12.91 | 12.54 | 12.81 | 12.07 | 4.74E-02 | 6.20E-01 | 9.86E-01 | 3.98E-02 | 8.30E-01 | 4.67E-01 | 1.02E-01 |
| 874.55935 | 226.1  | 16.50 | 16.79 | 16.94 | 16.45 | 4.90E-01 | 8.48E-01 | 6.09E-01 | 9.99E-01 | 9.79E-01 | 7.90E-01 | 5.51E-01 |
| 874.57173 | 210.21 | 15.24 | 16.03 | 16.22 | 15.39 | 7.52E-03 | 7.48E-02 | 1.42E-02 | 9.67E-01 | 9.41E-01 | 2.53E-01 | 7.65E-02 |
| 874.66491 | 45.66  | 13.60 | 14.91 | 15.36 | 15.14 | 1.50E-19 | 7.17E-11 | 4.44E-14 | 1.34E-13 | 7.00E-02 | 6.03E-01 | 6.61E-01 |
| 874.67878 | 50.95  | 12.93 | 13.56 | 14.15 | 14.26 | 1.59E-09 | 1.67E-02 | 1.11E-07 | 2.41E-08 | 3.27E-02 | 1.04E-02 | 9.63E-01 |
| 875.5635  | 206.47 | 15.82 | 15.70 | 16.23 | 15.35 | 8.24E-02 | 9.80E-01 | 5.88E-01 | 4.81E-01 | 3.76E-01 | 7.37E-01 | 4.87E-02 |
| 876.57574 | 230.45 | 17.03 | 17.33 | 17.57 | 16.73 | 6.22E-02 | 7.72E-01 | 3.06E-01 | 7.71E-01 | 8.78E-01 | 2.54E-01 | 4.97E-02 |
| 876.60522 | 51.49  | 12.03 | 10.50 | 12.29 | 12.53 | 5.29E-19 | 1.04E-11 | 5.71E-01 | 8.53E-02 | 5.37E-14 | 4.39E-14 | 6.85E-01 |
| 876.66797 | 53.01  | 13.17 | 13.65 | 14.11 | 14.13 | 6.11E-10 | 9.79E-03 | 1.70E-08 | 2.83E-08 | 2.00E-02 | 1.88E-02 | 9.99E-01 |
| 876.67489 | 46.47  | 12.46 | 12.58 | 12.49 | 12.78 | 3.23E-01 | 9.08E-01 | 9.98E-01 | 3.01E-01 | 9.61E-01 | 7.12E-01 | 4.07E-01 |
| 877.45941 | 251.97 | 11.76 | 12.40 | 12.79 | 11.91 | 8.80E-05 | 3.75E-02 | 1.17E-04 | 9.30E-01 | 3.87E-01 | 2.03E-01 | 2.79E-03 |
| 877.57844 | 209.08 | 16.48 | 16.29 | 16.47 | 15.80 | 2.04E-02 | 8.60E-01 | 1.00E+00 | 2.41E-02 | 8.78E-01 | 1.80E-01 | 3.02E-02 |
| 877.59171 | 198.96 | 14.79 | 15.02 | 14.95 | 14.75 | 7.08E-01 | 8.07E-01 | 9.17E-01 | 9.99E-01 | 9.94E-01 | 7.53E-01 | 8.74E-01 |
| 878.59134 | 240.35 | 18.86 | 18.04 | 17.77 | 17.24 | 5.92E-08 | 8.42E-03 | 1.50E-04 | 1.79E-08 | 7.29E-01 | 1.68E-02 | 1.93E-01 |
| 878.75481 | 39.28  | 11.92 | 12.85 | 12.58 | 13.00 | 2.66E-05 | 3.97E-04 | 2.12E-02 | 4.27E-05 | 6.52E-01 | 9.24E-01 | 2.95E-01 |
| 879.50255 | 221.64 | 16.82 | 17.79 | 17.86 | 17.16 | 1.08E-09 | 3.62E-07 | 2.81E-08 | 2.29E-01 | 9.74E-01 | 3.54E-03 | 7.04E-04 |
| 879.5948  | 235.84 | 16.93 | 16.05 | 15.88 | 15.84 | 1.64E-05 | 2.09E-03 | 1.15E-04 | 1.05E-04 | 9.00E-01 | 8.36E-01 | 9.98E-01 |

|           |        |       |       |       |       |          |          |          |          |          |          |          |
|-----------|--------|-------|-------|-------|-------|----------|----------|----------|----------|----------|----------|----------|
| 880.49515 | 220.49 | 12.46 | 11.81 | 11.77 | 11.78 | 8.97E-03 | 3.46E-02 | 2.14E-02 | 2.98E-02 | 9.99E-01 | 9.99E-01 | 1.00E+00 |
| 880.50855 | 229.91 | 16.02 | 16.80 | 16.99 | 16.91 | 6.30E-06 | 1.03E-03 | 1.69E-05 | 1.97E-04 | 7.88E-01 | 9.57E-01 | 9.79E-01 |
| 880.60578 | 214.06 | 17.35 | 16.80 | 16.79 | 16.44 | 1.42E-04 | 2.51E-02 | 2.04E-02 | 4.89E-05 | 1.00E+00 | 3.02E-01 | 3.17E-01 |
| 880.69835 | 46.88  | 13.02 | 14.21 | 13.59 | 14.19 | 2.47E-20 | 4.17E-14 | 3.78E-05 | 4.40E-14 | 1.68E-05 | 9.99E-01 | 4.87E-05 |
| 880.7053  | 40.91  | 12.79 | 12.91 | 12.62 | 13.17 | 7.61E-03 | 8.65E-01 | 6.90E-01 | 6.99E-02 | 2.62E-01 | 3.51E-01 | 3.72E-03 |
| 881.51883 | 244.71 | 22.29 | 23.51 | 23.38 | 23.74 | 1.98E-16 | 1.14E-11 | 7.55E-10 | 4.88E-14 | 8.72E-01 | 5.49E-01 | 1.64E-01 |
| 881.60735 | 200.69 | 14.61 | 15.15 | 14.63 | 12.76 | 3.23E-10 | 3.49E-01 | 1.00E+00 | 6.89E-07 | 4.10E-01 | 3.23E-10 | 8.02E-07 |
| 882.52289 | 244.91 | 21.61 | 22.57 | 22.46 | 22.68 | 1.00E-09 | 2.17E-07 | 4.36E-06 | 1.62E-08 | 9.17E-01 | 9.25E-01 | 5.92E-01 |
| 883.53228 | 250.55 | 21.64 | 24.05 | 23.87 | 23.91 | 4.23E-15 | 1.95E-12 | 4.44E-11 | 8.97E-11 | 9.40E-01 | 9.74E-01 | 9.99E-01 |
| 884.53677 | 251.37 | 22.04 | 22.98 | 22.79 | 22.90 | 2.08E-06 | 7.72E-06 | 4.61E-04 | 7.97E-05 | 7.64E-01 | 9.80E-01 | 9.44E-01 |
| 885.54493 | 276.16 | 27.90 | 27.70 | 25.03 | 26.97 | 2.90E-14 | 9.43E-01 | 2.83E-13 | 5.95E-02 | 2.99E-11 | 2.23E-01 | 2.82E-06 |
| 886.55003 | 272.86 | 26.83 | 26.45 | 25.23 | 25.89 | 1.18E-07 | 5.11E-01 | 7.48E-08 | 5.16E-03 | 1.04E-04 | 2.10E-01 | 9.83E-02 |
| 887.55463 | 282.57 | 25.07 | 24.53 | 23.10 | 24.06 | 1.25E-14 | 8.66E-02 | 4.52E-14 | 1.26E-04 | 1.82E-08 | 1.98E-01 | 4.39E-04 |
| 888.56066 | 272.59 | 22.68 | 21.84 | 21.00 | 21.47 | 1.43E-11 | 1.16E-03 | 4.22E-12 | 1.72E-06 | 1.50E-03 | 3.99E-01 | 1.79E-01 |
| 888.69339 | 49.68  | 11.16 | 11.52 | 11.97 | 11.76 | 3.43E-02 | 5.95E-01 | 2.32E-02 | 1.73E-01 | 4.04E-01 | 8.51E-01 | 8.94E-01 |
| 888.70394 | 42.4   | 12.15 | 12.80 | 12.72 | 12.67 | 4.57E-04 | 7.49E-04 | 3.84E-03 | 1.41E-02 | 9.64E-01 | 8.82E-01 | 9.92E-01 |
| 889.56328 | 275.93 | 19.68 | 19.10 | 19.09 | 18.47 | 2.78E-04 | 1.27E-01 | 1.03E-01 | 6.20E-05 | 1.00E+00 | 1.00E-01 | 1.12E-01 |
| 890.58451 | 228.11 | 14.42 | 13.96 | 13.88 | 13.61 | 4.11E-02 | 3.42E-01 | 2.09E-01 | 2.52E-02 | 9.94E-01 | 6.40E-01 | 7.85E-01 |
| 890.59159 | 288.58 | 15.73 | 15.44 | 15.27 | 14.74 | 1.15E-02 | 7.54E-01 | 3.75E-01 | 5.31E-03 | 9.35E-01 | 9.83E-02 | 2.97E-01 |
| 890.59519 | 218.43 | 14.70 | 14.42 | 14.42 | 14.48 | 7.26E-01 | 7.65E-01 | 7.57E-01 | 8.69E-01 | 1.00E+00 | 9.98E-01 | 9.98E-01 |
| 890.63807 | 47.95  | 14.06 | 15.73 | 16.60 | 15.99 | 1.83E-27 | 1.26E-13 | 5.33E-15 | 4.16E-14 | 2.06E-04 | 6.07E-01 | 2.28E-02 |
| 890.64864 | 54.95  | 10.85 | 12.96 | 14.19 | 13.76 | 6.26E-18 | 1.01E-07 | 4.25E-14 | 8.58E-13 | 5.04E-03 | 1.48E-01 | 6.69E-01 |
| 891.59827 | 222.07 | 14.30 | 14.26 | 14.11 | 13.27 | 5.60E-02 | 9.99E-01 | 9.60E-01 | 5.89E-02 | 9.84E-01 | 9.19E-02 | 1.89E-01 |
| 892.59252 | 224.79 | 13.28 | 13.37 | 13.42 | 12.40 | 3.35E-04 | 9.80E-01 | 9.40E-01 | 3.91E-03 | 9.98E-01 | 1.47E-03 | 6.94E-04 |
| 892.60618 | 292.33 | 16.82 | 16.06 | 15.79 | 15.31 | 6.29E-06 | 3.71E-02 | 1.50E-03 | 2.40E-06 | 7.77E-01 | 5.93E-02 | 3.72E-01 |
| 892.64056 | 55.38  | 12.46 | 13.17 | 14.28 | 14.48 | 2.56E-06 | 3.15E-01 | 7.12E-05 | 1.80E-05 | 4.15E-02 | 1.45E-02 | 9.67E-01 |
| 893.60795 | 221.2  | 14.39 | 14.22 | 14.21 | 13.56 | 8.50E-02 | 9.51E-01 | 9.45E-01 | 6.43E-02 | 1.00E+00 | 2.25E-01 | 2.25E-01 |
| 893.61135 | 290.68 | 15.78 | 15.10 | 14.97 | 14.63 | 1.17E-06 | 5.20E-03 | 3.96E-04 | 5.58E-07 | 9.13E-01 | 1.28E-01 | 3.95E-01 |
| 893.6205  | 217.2  | 14.17 | 13.83 | 13.41 | 12.83 | 1.23E-04 | 6.41E-01 | 4.31E-02 | 6.35E-05 | 4.93E-01 | 6.93E-03 | 2.25E-01 |
| 894.5489  | 196.29 | 17.25 | 16.35 | 16.34 | 16.21 | 9.25E-08 | 1.86E-05 | 1.19E-05 | 9.33E-07 | 1.00E+00 | 8.82E-01 | 9.00E-01 |
| 894.57844 | 197.56 | 13.74 | 13.79 | 14.01 | 13.35 | 2.71E-02 | 9.96E-01 | 5.40E-01 | 2.60E-01 | 7.08E-01 | 1.89E-01 | 1.29E-02 |
| 894.58729 | 200.89 | 14.52 | 15.29 | 15.32 | 14.57 | 1.57E-06 | 2.30E-04 | 1.19E-04 | 9.92E-01 | 9.99E-01 | 1.54E-03 | 8.96E-04 |
| 894.59638 | 198.13 | 13.05 | 13.19 | 12.61 | 12.69 | 3.91E-02 | 9.26E-01 | 2.05E-01 | 4.07E-01 | 6.04E-02 | 1.56E-01 | 9.87E-01 |
| 894.62467 | 216.14 | 14.95 | 13.95 | 13.79 | 14.33 | 4.80E-08 | 5.17E-06 | 9.02E-08 | 1.33E-02 | 8.78E-01 | 2.64E-01 | 5.25E-02 |
| 894.73286 | 45.84  | 12.91 | 14.15 | 13.79 | 14.13 | 3.48E-15 | 4.67E-13 | 1.53E-07 | 2.63E-12 | 1.18E-01 | 1.00E+00 | 1.60E-01 |
| 894.74343 | 40.47  | 11.96 | 12.91 | 12.55 | 13.04 | 1.30E-08 | 9.85E-07 | 4.46E-03 | 5.90E-08 | 1.90E-01 | 9.08E-01 | 4.48E-02 |
| 895.53801 | 191.68 | 11.95 | 11.52 | 11.62 | 11.52 | 5.26E-01 | 5.63E-01 | 7.43E-01 | 5.97E-01 | 9.91E-01 | 1.00E+00 | 9.93E-01 |
| 895.55951 | 195.61 | 13.58 | 13.06 | 12.90 | 12.80 | 1.05E-01 | 4.09E-01 | 1.81E-01 | 1.11E-01 | 9.70E-01 | 8.86E-01 | 9.91E-01 |
| 895.56726 | 278.74 | 16.50 | 16.34 | 16.02 | 15.68 | 1.66E-03 | 8.87E-01 | 1.18E-01 | 1.34E-03 | 4.67E-01 | 1.84E-02 | 4.06E-01 |
| 895.58473 | 197.82 | 12.78 | 13.49 | 13.20 | 13.03 | 4.32E-01 | 3.61E-01 | 7.65E-01 | 9.45E-01 | 9.12E-01 | 7.43E-01 | 9.82E-01 |
| 896.55181 | 191.24 | 12.53 | 12.41 | 12.49 | 12.61 | 8.98E-01 | 9.62E-01 | 9.98E-01 | 9.90E-01 | 9.91E-01 | 8.74E-01 | 9.65E-01 |
| 896.56592 | 194.63 | 13.50 | 14.08 | 13.50 | 13.22 | 2.96E-01 | 5.49E-01 | 1.00E+00 | 9.18E-01 | 5.64E-01 | 2.40E-01 | 9.24E-01 |
| 896.59273 | 195.89 | 10.77 | 12.38 | 12.84 | 12.03 | 3.46E-11 | 2.82E-07 | 2.48E-11 | 1.47E-04 | 3.93E-01 | 6.42E-01 | 3.47E-02 |
| 896.6684  | 43.12  | 12.49 | 12.98 | 12.88 | 12.95 | 5.69E-04 | 1.20E-03 | 1.38E-02 | 3.71E-03 | 8.82E-01 | 9.96E-01 | 9.58E-01 |
| 896.67918 | 48.08  | 12.09 | 13.05 | 12.71 | 13.04 | 2.49E-06 | 1.12E-05 | 9.27E-03 | 2.58E-05 | 3.17E-01 | 1.00E+00 | 3.72E-01 |

|           |        |       |       |       |       |           |          |          |          |          |          |          |
|-----------|--------|-------|-------|-------|-------|-----------|----------|----------|----------|----------|----------|----------|
| 897.55428 | 262.04 | 15.75 | 16.22 | 15.49 | 16.07 | 2.42E-01  | 6.02E-01 | 8.96E-01 | 8.41E-01 | 2.32E-01 | 9.83E-01 | 4.52E-01 |
| 898.54882 | 209.08 | 11.13 | 12.63 | 13.10 | 12.09 | 3.39E-03  | 3.36E-02 | 2.12E-03 | 3.27E-01 | 8.43E-01 | 7.82E-01 | 2.99E-01 |
| 898.55766 | 215.43 | 15.08 | 15.10 | 14.98 | 14.84 | 8.06E-01  | 1.00E+00 | 9.83E-01 | 8.31E-01 | 9.76E-01 | 8.14E-01 | 9.63E-01 |
| 898.57692 | 194.85 | 14.64 | 13.80 | 12.45 | 14.05 | 3.78E-04  | 3.54E-01 | 1.36E-04 | 6.71E-01 | 5.09E-02 | 9.67E-01 | 1.66E-02 |
| 899.52918 | 218.23 | 8.34  | 13.09 | 12.88 | 10.76 | 3.41E-16  | 9.79E-14 | 3.89E-13 | 3.03E-04 | 9.83E-01 | 7.84E-04 | 2.55E-03 |
| 899.56334 | 295.47 | 14.98 | 11.31 | 13.40 | 11.78 | 1.60E-07  | 4.02E-07 | 7.64E-02 | 2.26E-05 | 1.07E-02 | 9.02E-01 | 8.81E-02 |
| 899.57105 | 208.25 | 12.91 | 12.54 | 13.37 | 12.52 | 4.32E-01  | 9.18E-01 | 8.41E-01 | 9.09E-01 | 4.80E-01 | 1.00E+00 | 4.76E-01 |
| 900.53655 | 216.1  | 12.90 | 14.32 | 13.61 | 14.43 | 3.46E-08  | 1.36E-06 | 3.62E-02 | 3.37E-07 | 4.79E-02 | 9.77E-01 | 1.84E-02 |
| 901.54442 | 224.03 | 13.65 | 14.87 | 15.03 | 13.63 | 3.26E-03  | 5.37E-02 | 2.06E-02 | 1.00E+00 | 9.89E-01 | 6.63E-02 | 2.78E-02 |
| 902.55008 | 226.23 | 13.35 | 14.56 | 14.29 | 13.17 | 1.69E-02  | 7.50E-02 | 2.27E-01 | 9.84E-01 | 9.53E-01 | 4.27E-02 | 1.38E-01 |
| 903.50331 | 216.62 | 12.79 | 12.29 | 12.12 | 11.97 | 7.28E-03  | 1.74E-01 | 2.95E-02 | 7.04E-03 | 8.98E-01 | 6.09E-01 | 9.44E-01 |
| 903.51053 | 221.76 | 12.47 | 12.13 | 12.31 | 12.17 | 6.57E-01  | 6.53E-01 | 9.43E-01 | 7.52E-01 | 9.35E-01 | 9.99E-01 | 9.71E-01 |
| 904.67783 | 51.96  | 11.73 | 12.43 | 12.33 | 12.64 | 6.53E-04  | 1.01E-02 | 3.49E-02 | 5.22E-04 | 9.72E-01 | 8.05E-01 | 5.43E-01 |
| 905.50671 | 227.42 | 13.89 | 12.80 | 12.99 | 12.86 | 1.70E-09  | 2.77E-08 | 4.51E-06 | 3.35E-07 | 7.28E-01 | 9.89E-01 | 8.99E-01 |
| 905.52564 | 224.45 | 15.94 | 16.08 | 16.15 | 15.72 | 6.11E-02  | 8.12E-01 | 5.31E-01 | 5.46E-01 | 9.71E-01 | 1.46E-01 | 5.08E-02 |
| 906.5104  | 228.6  | 12.35 | 12.10 | 11.71 | 11.96 | 4.00E-02  | 6.90E-01 | 2.24E-02 | 3.21E-01 | 3.16E-01 | 9.26E-01 | 7.19E-01 |
| 906.52133 | 224.15 | 14.60 | 13.69 | 13.76 | 13.40 | 1.97E-11  | 2.50E-07 | 1.74E-06 | 4.16E-11 | 9.73E-01 | 3.43E-01 | 1.56E-01 |
| 906.60545 | 49.28  | 11.55 | 11.47 | 11.86 | 11.98 | 3.40E-02  | 9.77E-01 | 3.55E-01 | 1.29E-01 | 1.91E-01 | 5.95E-02 | 9.35E-01 |
| 906.61465 | 57.08  | 12.83 | 12.86 | 14.30 | 14.12 | 4.88E-13  | 9.99E-01 | 2.13E-09 | 4.50E-07 | 1.14E-08 | 1.62E-06 | 8.71E-01 |
| 907.53417 | 243.64 | 18.85 | 18.77 | 18.82 | 17.97 | 3.45E-05  | 9.82E-01 | 9.99E-01 | 1.01E-04 | 9.95E-01 | 6.84E-04 | 2.36E-04 |
| 908.53931 | 242.61 | 15.71 | 15.26 | 15.04 | 15.62 | 1.29E-05  | 1.12E-02 | 2.60E-05 | 9.15E-01 | 4.27E-01 | 9.68E-02 | 9.88E-04 |
| 908.55035 | 236.29 | 15.13 | 14.49 | 14.66 | 15.03 | 2.90E-05  | 7.94E-05 | 6.92E-03 | 9.10E-01 | 6.32E-01 | 2.44E-03 | 7.29E-02 |
| 909.54865 | 266.68 | 23.19 | 21.13 | 21.90 | 22.85 | 9.84E-10  | 2.51E-09 | 2.94E-04 | 7.07E-01 | 8.05E-02 | 3.28E-06 | 2.35E-02 |
| 910.55259 | 272.28 | 22.21 | 20.60 | 21.16 | 22.18 | 1.72E-17  | 6.01E-14 | 3.64E-07 | 9.99E-01 | 2.09E-02 | 6.79E-13 | 3.14E-06 |
| 910.70418 | 47.11  | 12.93 | 14.19 | 13.92 | 14.14 | 4.32E-15  | 5.66E-13 | 7.37E-09 | 9.96E-12 | 3.56E-01 | 9.93E-01 | 5.41E-01 |
| 910.71521 | 40.65  | 12.98 | 12.88 | 12.72 | 13.28 | 1.08E-02  | 9.15E-01 | 3.49E-01 | 2.71E-01 | 7.67E-01 | 8.38E-02 | 5.28E-03 |
| 911.56268 | 278.58 | 23.43 | 22.46 | 21.92 | 22.15 | 6.35E-09  | 4.87E-04 | 8.95E-09 | 2.95E-06 | 1.26E-01 | 6.00E-01 | 8.08E-01 |
| 912.56757 | 280.74 | 22.42 | 21.49 | 21.09 | 21.04 | 3.42E-11  | 4.25E-05 | 1.93E-09 | 1.42E-09 | 2.35E-01 | 1.55E-01 | 9.93E-01 |
| 912.70275 | 47.22  | 10.98 | 12.48 | 11.92 | 11.97 | 4.06E-06  | 1.19E-06 | 4.56E-03 | 3.63E-03 | 2.02E-01 | 3.13E-01 | 9.98E-01 |
| 913.57288 | 287.03 | 19.99 | 19.62 | 19.52 | 18.56 | 4.28E-06  | 4.87E-01 | 2.73E-01 | 1.18E-06 | 9.84E-01 | 8.00E-04 | 2.57E-03 |
| 914.57806 | 286.42 | 15.40 | 15.82 | 15.80 | 15.33 | 2.93E-01  | 5.46E-01 | 5.84E-01 | 9.95E-01 | 1.00E+00 | 4.43E-01 | 4.77E-01 |
| 915.52901 | 232.78 | 9.36  | 12.02 | 12.48 | 9.65  | 1.70E-10  | 3.72E-06 | 3.11E-08 | 9.49E-01 | 8.18E-01 | 1.27E-04 | 2.34E-06 |
| 918.53888 | 198.19 | 13.78 | 13.07 | 13.80 | 13.38 | 2.08E-02  | 3.89E-02 | 1.00E+00 | 4.53E-01 | 3.57E-02 | 6.86E-01 | 4.20E-01 |
| 918.5554  | 194.61 | 14.50 | 13.79 | 14.11 | 14.14 | 2.33E-03  | 7.15E-04 | 1.36E-01 | 2.10E-01 | 3.13E-01 | 2.74E-01 | 9.99E-01 |
| 919.55005 | 193.25 | 13.89 | 13.04 | 13.33 | 13.51 | 5.43E-04  | 2.01E-04 | 3.01E-02 | 2.64E-01 | 4.71E-01 | 1.18E-01 | 8.36E-01 |
| 920.56125 | 191.86 | 13.70 | 12.84 | 12.85 | 12.86 | 2.91E-06  | 5.18E-05 | 4.87E-05 | 1.29E-04 | 1.00E+00 | 1.00E+00 | 1.00E+00 |
| 922.57341 | 194.91 | 13.75 | 13.23 | 12.99 | 13.06 | 2.47E-05  | 1.02E-02 | 3.61E-05 | 4.62E-04 | 4.88E-01 | 7.88E-01 | 9.70E-01 |
| 923.50712 | 189.06 | 13.51 | 12.07 | 12.19 | 11.41 | 9.14E-12  | 1.25E-06 | 7.54E-06 | 4.28E-12 | 9.76E-01 | 9.21E-02 | 3.11E-02 |
| 926.67145 | 42.17  | 10.00 | 12.43 | 12.25 | 12.27 | 4.86E-17  | 9.23E-14 | 1.41E-12 | 5.03E-12 | 9.33E-01 | 9.55E-01 | 1.00E+00 |
| 926.68281 | 48.3   | 10.68 | 13.72 | 13.68 | 13.81 | 3.03E-22  | 4.31E-14 | 4.22E-14 | 4.24E-14 | 9.99E-01 | 9.94E-01 | 9.79E-01 |
| 928.68109 | 48.71  | 10.32 | 12.77 | 12.48 | 12.81 | 4.71E-16  | 6.47E-13 | 1.15E-10 | 1.13E-12 | 7.99E-01 | 1.00E+00 | 7.52E-01 |
| 929.51732 | 221.44 | 11.27 | 11.61 | 12.72 | 11.42 | 6.02E-05  | 7.23E-01 | 6.75E-05 | 9.70E-01 | 5.50E-03 | 9.45E-01 | 1.02E-03 |
| 931.5249  | 211.44 | 10.42 | 12.54 | 12.60 | 9.56  | 1.00E-18  | 2.38E-08 | 6.06E-09 | 7.17E-02 | 9.98E-01 | 1.71E-13 | 7.04E-14 |
| 931.61626 | 220.36 | 14.41 | 10.57 | 10.25 | 10.88 | 9.10E-105 | 5.11E-15 | 5.11E-15 | 5.11E-15 | 3.11E-02 | 4.58E-02 | 1.36E-06 |
| 932.71264 | 46.45  | 10.59 | 12.55 | 11.90 | 12.61 | 3.83E-11  | 2.09E-09 | 8.32E-05 | 1.61E-09 | 1.46E-01 | 9.97E-01 | 1.04E-01 |

|           |        |       |       |       |       |          |          |          |          |          |          |          |
|-----------|--------|-------|-------|-------|-------|----------|----------|----------|----------|----------|----------|----------|
| 933.48147 | 227.04 | 9.81  | 10.65 | 11.15 | 11.54 | 1.28E-05 | 7.39E-02 | 6.62E-04 | 1.09E-05 | 4.83E-01 | 6.87E-02 | 6.96E-01 |
| 933.49294 | 222.78 | 10.69 | 11.36 | 11.84 | 12.60 | 6.49E-08 | 1.20E-01 | 8.80E-04 | 1.87E-08 | 4.03E-01 | 7.27E-04 | 7.78E-02 |
| 934.52734 | 194.05 | 11.32 | 12.78 | 12.54 | 11.82 | 9.02E-04 | 1.34E-03 | 9.47E-03 | 5.95E-01 | 9.35E-01 | 9.49E-02 | 2.90E-01 |
| 942.65801 | 51.19  | 11.26 | 12.76 | 12.53 | 12.90 | 1.27E-11 | 4.68E-09 | 6.26E-07 | 4.69E-10 | 7.71E-01 | 9.45E-01 | 4.40E-01 |
| 967.55634 | 171.69 | 11.06 | 9.69  | 10.31 | 9.85  | 1.00E-03 | 1.09E-03 | 1.63E-01 | 7.03E-03 | 3.25E-01 | 9.74E-01 | 6.09E-01 |
| 971.61001 | 209.2  | 14.45 | 15.70 | 15.34 | 14.75 | 7.17E-03 | 7.08E-03 | 9.35E-02 | 8.71E-01 | 7.91E-01 | 9.11E-02 | 4.62E-01 |
| 972.61362 | 210.67 | 12.76 | 12.19 | 11.81 | 11.66 | 4.87E-02 | 5.29E-01 | 1.02E-01 | 5.24E-02 | 8.04E-01 | 6.17E-01 | 9.86E-01 |
| 975.6446  | 209.5  | 11.39 | 12.19 | 10.33 | 12.47 | 4.95E-10 | 5.06E-02 | 4.39E-03 | 4.80E-03 | 1.14E-07 | 8.38E-01 | 2.65E-09 |
| 984.76699 | 223.56 | 14.17 | 13.47 | 13.20 | 12.72 | 2.48E-03 | 2.48E-01 | 4.74E-02 | 1.16E-03 | 8.93E-01 | 2.26E-01 | 6.06E-01 |
| 986.76911 | 263.94 | 14.70 | 13.81 | 13.80 | 13.73 | 2.98E-05 | 5.94E-04 | 4.58E-04 | 2.21E-04 | 1.00E+00 | 9.86E-01 | 9.89E-01 |
| 986.77739 | 258.05 | 15.68 | 15.16 | 14.82 | 14.80 | 6.87E-04 | 1.29E-01 | 1.78E-03 | 1.90E-03 | 4.96E-01 | 4.59E-01 | 1.00E+00 |
| 987.78491 | 258.54 | 15.37 | 14.60 | 14.19 | 14.07 | 1.26E-05 | 2.57E-02 | 1.16E-04 | 3.53E-05 | 4.65E-01 | 2.63E-01 | 9.75E-01 |
| 995.6141  | 210.28 | 11.81 | 12.29 | 11.92 | 11.69 | 1.80E-01 | 2.92E-01 | 9.79E-01 | 9.74E-01 | 5.32E-01 | 1.60E-01 | 8.60E-01 |
| 1010.7771 | 238.38 | 15.08 | 14.41 | 14.86 | 14.51 | 2.68E-02 | 3.22E-02 | 8.09E-01 | 1.07E-01 | 2.61E-01 | 9.79E-01 | 5.09E-01 |
| 1012.7963 | 265.53 | 17.33 | 17.73 | 17.54 | 17.17 | 8.10E-03 | 6.89E-02 | 5.62E-01 | 7.71E-01 | 6.60E-01 | 6.79E-03 | 1.33E-01 |
| 1012.807  | 270.79 | 15.94 | 15.01 | 14.87 | 15.09 | 1.03E-03 | 8.20E-03 | 1.35E-03 | 2.32E-02 | 9.64E-01 | 9.94E-01 | 8.88E-01 |
| 1013.7985 | 264.8  | 16.44 | 15.96 | 15.84 | 15.89 | 1.23E-02 | 8.29E-02 | 1.59E-02 | 4.33E-02 | 9.40E-01 | 9.90E-01 | 9.95E-01 |
| 1014.8042 | 290.58 | 15.06 | 14.45 | 14.19 | 13.70 | 4.58E-02 | 5.61E-01 | 2.48E-01 | 2.70E-02 | 9.52E-01 | 4.37E-01 | 7.49E-01 |
| 1035.663  | 229.26 | 16.04 | 11.04 | 10.70 | 11.67 | 6.36E-88 | 5.11E-15 | 5.11E-15 | 5.11E-15 | 2.38E-01 | 5.03E-03 | 2.37E-06 |
| 1036.6612 | 224.52 | 15.06 | 10.14 | 9.93  | 10.61 | 2.20E-92 | 5.11E-15 | 5.11E-15 | 5.11E-15 | 5.86E-01 | 3.66E-02 | 5.76E-04 |
| 1036.7915 | 256.72 | 15.63 | 15.11 | 15.58 | 15.31 | 1.04E-01 | 1.16E-01 | 9.96E-01 | 5.44E-01 | 1.98E-01 | 8.41E-01 | 6.91E-01 |
| 1038.8104 | 267.61 | 16.39 | 16.36 | 16.36 | 16.07 | 4.79E-01 | 9.99E-01 | 1.00E+00 | 4.92E-01 | 1.00E+00 | 5.97E-01 | 5.70E-01 |
| 1040.8263 | 295.04 | 13.11 | 15.27 | 15.87 | 14.21 | 1.09E-06 | 2.49E-04 | 1.03E-06 | 1.66E-01 | 6.60E-01 | 2.12E-01 | 1.23E-02 |
| 1062.8086 | 267.11 | 15.38 | 15.66 | 16.17 | 15.76 | 1.07E-01 | 8.29E-01 | 6.51E-02 | 6.52E-01 | 3.94E-01 | 9.88E-01 | 6.19E-01 |
| 1082.1994 | 21.14  | 12.93 | 11.67 | 11.52 | 10.80 | 1.15E-07 | 1.71E-03 | 2.72E-04 | 3.64E-08 | 9.72E-01 | 7.87E-02 | 1.90E-01 |
