# Supplementary material
Source: PubMed Central journal article supplement (PMC9062885)
Supplement: NIHMS1790332-supplement-Table_S3.pdf [file NIHMS1790332-supplement-Table_S3.pdf]

Supplemental Table 3

Nellis et al, Lung metabolome of 1,3-butadiene exposed Collaborative Cross mice  
reflects metabolic phenotype of human lung cancer

High resolution metabolomics analysis of lung from collaborative-cross mice  
exposed to butadiene

PLS-DA results\*, C18/ESI- data

\*values reported for data that was log<sub>2</sub>- transformed and quantile-normalized

| mz      | time   | mean - Ctrl | mean - 2ppm | mean - 20ppm | mean-200ppm | VIP  |
|---------|--------|-------------|-------------|--------------|-------------|------|
| 85.0294 | 20.84  | 20.46       | 20.74       | 20.87        | 20.93       | 1.12 |
| 86.0246 | 194.65 | 16.66       | 13.86       | 13.42        | 14.42       | 1.41 |
| 86.0513 | 26.23  | 16.00       | 15.54       | 15.42        | 14.81       | 0.63 |
| 87.0086 | 254.2  | 18.04       | 17.44       | 17.62        | 17.88       | 0.87 |
| 87.0087 | 23.09  | 21.21       | 21.58       | 21.69        | 21.50       | 1.34 |
| 87.0271 | 131.43 | 14.90       | 14.12       | 14.03        | 14.12       | 1.22 |
| 87.0272 | 21.58  | 17.71       | 16.87       | 16.91        | 16.59       | 0.93 |
| 87.0450 | 169.19 | 15.88       | 15.23       | 15.25        | 15.64       | 0.82 |
| 87.2103 | 209.84 | 12.01       | 12.00       | 12.44        | 12.87       | 0.24 |
| 88.0038 | 290.46 | 13.47       | 15.61       | 15.45        | 16.41       | 1.30 |
| 88.0038 | 163.35 | 15.02       | 14.77       | 14.90        | 14.89       | 0.25 |
| 88.0120 | 124.36 | 14.80       | 14.60       | 14.88        | 14.98       | 0.06 |
| 88.0121 | 19.52  | 15.68       | 15.86       | 15.89        | 15.64       | 0.40 |
| 88.0402 | 263    | 17.52       | 17.52       | 18.01        | 17.76       | 0.44 |
| 88.0404 | 24.85  | 21.62       | 21.64       | 21.76        | 21.73       | 0.23 |
| 88.1690 | 254.81 | 14.30       | 13.79       | 13.95        | 14.23       | 0.28 |
| 89.0143 | 291.73 | 17.69       | 14.96       | 15.19        | 15.43       | 1.45 |
| 89.0243 | 151.56 | 24.17       | 27.21       | 26.91        | 26.76       | 1.35 |
| 89.0243 | 279.64 | 22.97       | 24.80       | 24.85        | 24.68       | 1.85 |
| 89.0426 | 185.87 | 17.29       | 17.07       | 17.20        | 17.06       | 0.26 |
| 89.2316 | 226    | 14.68       | 10.02       | 9.80         | 10.31       | 2.31 |
| 90.0095 | 296.14 | 18.74       | 16.86       | 16.87        | 16.82       | 1.77 |
| 90.0097 | 93.57  | 16.06       | 13.82       | 14.34        | 14.80       | 1.93 |
| 90.0186 | 288.56 | 16.71       | 17.56       | 17.85        | 17.22       | 1.16 |
| 90.0276 | 147.35 | 21.50       | 22.77       | 22.70        | 22.50       | 1.27 |
| 90.0277 | 19.13  | 21.69       | 21.91       | 21.97        | 21.80       | 0.57 |
| 90.0305 | 137.49 | 14.39       | 13.82       | 13.86        | 14.07       | 0.67 |
| 90.8111 | 220.84 | 12.62       | 13.49       | 13.14        | 13.47       | 0.96 |
| 90.9357 | 92.57  | 15.96       | 15.51       | 15.52        | 15.60       | 0.93 |
| 91.0219 | 208.27 | 15.67       | 15.18       | 14.45        | 14.57       | 0.55 |
| 91.0300 | 266.14 | 21.32       | 18.67       | 19.06        | 19.02       | 2.03 |
| 91.0310 | 28.07  | 18.07       | 18.55       | 18.50        | 18.24       | 0.43 |
| 91.0503 | 142.11 | 14.11       | 12.91       | 12.66        | 13.22       | 1.31 |
| 91.0584 | 179.98 | 15.46       | 15.40       | 15.56        | 14.90       | 0.09 |
| 92.0253 | 273.39 | 21.06       | 19.12       | 19.51        | 19.51       | 1.57 |
| 92.0255 | 22.19  | 19.72       | 18.09       | 18.14        | 18.69       | 1.72 |
| 92.0345 | 27.62  | 24.42       | 24.32       | 24.29        | 23.93       | 0.21 |
| 92.4971 | 203    | 10.26       | 12.43       | 12.82        | 12.65       | 1.40 |
| 92.9280 | 21.48  | 21.62       | 20.86       | 20.85        | 21.29       | 0.75 |
| 92.9328 | 98.31  | 13.68       | 13.18       | 13.08        | 13.23       | 0.39 |
| 93.0092 | 291.62 | 17.67       | 16.37       | 16.60        | 16.43       | 1.58 |
| 93.0093 | 16.84  | 16.28       | 13.92       | 13.96        | 14.34       | 1.99 |
| 93.0344 | 287.01 | 16.62       | 16.86       | 16.38        | 16.45       | 0.00 |
| 93.0458 | 33.87  | 15.49       | 14.85       | 14.90        | 14.83       | 0.87 |
| 93.8966 | 297.31 | 14.40       | 13.97       | 14.85        | 14.78       | 0.01 |
| 93.9726 | 105.13 | 14.56       | 13.34       | 13.26        | 13.68       | 1.38 |
| 93.9910 | 56.64  | 14.38       | 14.23       | 14.31        | 14.95       | 0.01 |
| 94.0045 | 292.69 | 16.22       | 15.69       | 15.68        | 15.07       | 0.61 |
| 94.0297 | 215.63 | 18.14       | 16.25       | 16.16        | 16.91       | 1.48 |
| 94.0386 | 24.93  | 16.14       | 15.45       | 15.34        | 15.31       | 0.96 |
| 94.0409 | 286.27 | 16.59       | 14.54       | 14.70        | 14.15       | 1.29 |
| 94.1128 | 227.87 | 15.29       | 11.23       | 10.81        | 11.49       | 2.24 |
| 94.9250 | 22.1   | 21.07       | 20.30       | 20.28        | 20.72       | 0.76 |
| 94.9805 | 156.77 | 20.06       | 20.44       | 20.44        | 20.62       | 0.43 |
| 94.9806 | 294.23 | 18.76       | 19.55       | 19.57        | 19.92       | 1.13 |
| 95.0137 | 127.62 | 15.21       | 14.35       | 14.17        | 14.83       | 1.19 |
| 95.0249 | 271.98 | 18.88       | 17.70       | 17.88        | 18.04       | 1.08 |

|          |        |       |       |       |       |      |
|----------|--------|-------|-------|-------|-------|------|
| 95.0501  | 156.09 | 15.41 | 13.96 | 14.15 | 14.68 | 1.47 |
| 95.0676  | 268.78 | 19.07 | 17.82 | 18.07 | 18.71 | 1.18 |
| 95.6702  | 239.81 | 15.49 | 14.08 | 14.69 | 14.56 | 0.86 |
| 95.8243  | 213.25 | 12.31 | 12.36 | 12.61 | 13.43 | 0.20 |
| 95.9521  | 290.81 | 12.25 | 17.13 | 17.06 | 16.43 | 2.02 |
| 95.9522  | 86.66  | 16.54 | 16.82 | 16.54 | 16.46 | 0.19 |
| 95.9801  | 158.18 | 15.37 | 14.67 | 14.82 | 15.08 | 0.84 |
| 96.0089  | 283.66 | 17.77 | 17.17 | 17.52 | 17.27 | 0.81 |
| 96.0203  | 211.33 | 13.76 | 9.72  | 10.93 | 9.20  | 0.92 |
| 96.0204  | 25.8   | 14.96 | 12.20 | 13.49 | 13.55 | 0.71 |
| 96.0283  | 101.49 | 14.76 | 13.33 | 13.44 | 13.93 | 1.51 |
| 96.0454  | 187.22 | 16.87 | 14.70 | 14.74 | 15.47 | 1.91 |
| 96.0566  | 258.15 | 19.80 | 17.79 | 17.98 | 17.76 | 2.12 |
| 96.2736  | 239.38 | 18.85 | 17.87 | 18.20 | 18.48 | 1.33 |
| 96.9221  | 25.71  | 18.31 | 17.26 | 17.20 | 17.81 | 1.05 |
| 96.9518  | 18.97  | 14.21 | 14.88 | 14.55 | 14.55 | 0.52 |
| 96.9604  | 17.22  | 24.50 | 25.73 | 25.57 | 25.47 | 1.84 |
| 96.9694  | 22.95  | 25.09 | 26.21 | 26.32 | 26.23 | 1.64 |
| 96.9763  | 113.21 | 18.89 | 18.02 | 18.31 | 18.94 | 0.45 |
| 97.0042  | 290.8  | 18.26 | 17.20 | 17.40 | 17.03 | 1.44 |
| 97.0042  | 84.13  | 16.03 | 13.99 | 14.26 | 14.58 | 1.83 |
| 97.0293  | 291.97 | 16.68 | 16.19 | 16.15 | 16.46 | 0.91 |
| 97.0406  | 281.44 | 17.96 | 16.68 | 16.82 | 16.74 | 1.78 |
| 97.0657  | 180.38 | 15.97 | 15.54 | 15.59 | 16.04 | 0.73 |
| 97.5165  | 226.43 | 13.53 | 10.77 | 11.68 | 13.22 | 0.88 |
| 97.9594  | 107.58 | 15.07 | 15.38 | 15.46 | 15.13 | 0.55 |
| 97.9594  | 20.79  | 17.11 | 18.10 | 17.89 | 17.79 | 1.50 |
| 97.9738  | 19.7   | 15.30 | 15.46 | 15.46 | 15.47 | 0.22 |
| 98.0070  | 23.74  | 14.92 | 14.97 | 15.26 | 14.91 | 0.17 |
| 98.0121  | 209.98 | 14.55 | 8.56  | 8.88  | 9.11  | 1.33 |
| 98.0246  | 288.9  | 18.74 | 18.41 | 18.36 | 18.45 | 0.45 |
| 98.0358  | 290.42 | 16.86 | 15.44 | 15.84 | 15.55 | 1.42 |
| 98.0359  | 92.41  | 17.01 | 15.20 | 15.86 | 16.23 | 1.72 |
| 98.0431  | 134.77 | 14.50 | 13.62 | 14.08 | 14.07 | 0.76 |
| 98.0610  | 133.96 | 14.57 | 12.92 | 13.16 | 13.42 | 1.61 |
| 98.9489  | 144    | 14.40 | 14.47 | 14.45 | 14.14 | 0.02 |
| 98.9642  | 106.76 | 15.20 | 15.47 | 15.69 | 15.23 | 0.52 |
| 98.9643  | 23.36  | 17.29 | 18.39 | 18.10 | 18.02 | 1.60 |
| 98.9718  | 110.7  | 19.59 | 19.28 | 19.36 | 19.92 | 0.18 |
| 98.9728  | 26.45  | 18.74 | 19.02 | 19.03 | 19.23 | 0.71 |
| 99.0067  | 163.95 | 17.38 | 15.99 | 15.47 | 15.82 | 0.96 |
| 99.0086  | 292.22 | 17.72 | 17.62 | 17.60 | 18.07 | 0.11 |
| 99.0198  | 289.29 | 20.90 | 20.27 | 20.44 | 20.06 | 0.82 |
| 99.0280  | 168.02 | 15.44 | 14.69 | 14.58 | 15.13 | 1.02 |
| 99.0461  | 190.32 | 18.92 | 19.13 | 18.60 | 18.24 | 0.07 |
| 99.0465  | 26.45  | 17.33 | 17.41 | 16.90 | 16.99 | 0.24 |
| 99.0555  | 162.05 | 14.78 | 13.15 | 13.16 | 13.47 | 1.37 |
| 99.0815  | 106.72 | 14.93 | 13.72 | 13.94 | 14.37 | 1.40 |
| 99.8061  | 55.32  | 12.99 | 13.48 | 13.19 | 13.56 | 0.30 |
| 99.9256  | 297.18 | 18.52 | 18.49 | 18.25 | 19.45 | 0.01 |
| 99.9257  | 148.27 | 19.32 | 17.89 | 18.13 | 18.56 | 1.18 |
| 99.9714  | 126.28 | 14.52 | 13.47 | 13.52 | 14.27 | 1.16 |
| 100.0038 | 290.95 | 17.05 | 16.99 | 17.01 | 17.35 | 0.02 |
| 100.0121 | 24.47  | 18.12 | 17.59 | 17.67 | 18.10 | 0.70 |
| 100.0226 | 120.14 | 14.92 | 15.18 | 15.28 | 15.15 | 0.30 |
| 100.0306 | 23.3   | 19.29 | 18.90 | 18.88 | 18.58 | 0.55 |
| 100.0403 | 290.65 | 16.79 | 16.20 | 16.22 | 16.49 | 1.03 |
| 100.2513 | 262.42 | 14.78 | 14.66 | 12.84 | 12.57 | 0.55 |
| 100.9258 | 291.11 | 12.89 | 13.14 | 11.98 | 14.85 | 0.01 |
| 100.9258 | 140.16 | 15.62 | 13.45 | 13.62 | 14.14 | 1.89 |
| 100.9461 | 19.23  | 15.19 | 12.92 | 12.60 | 12.70 | 1.04 |
| 100.9646 | 51     | 21.80 | 19.23 | 22.57 | 22.35 | 0.69 |

|          |        |       |       |       |       |      |
|----------|--------|-------|-------|-------|-------|------|
| 100.9675 | 112.47 | 17.34 | 17.99 | 18.06 | 18.14 | 0.76 |
| 100.9856 | 99.64  | 17.97 | 16.16 | 16.53 | 16.49 | 1.49 |
| 100.9991 | 291.49 | 19.53 | 19.49 | 19.45 | 18.98 | 0.24 |
| 101.0073 | 106.94 | 15.17 | 14.36 | 14.90 | 15.05 | 0.54 |
| 101.0244 | 164.56 | 21.20 | 24.35 | 24.60 | 24.71 | 1.58 |
| 101.0355 | 84.16  | 15.91 | 14.13 | 14.47 | 14.65 | 1.59 |
| 101.0607 | 256    | 17.76 | 17.32 | 17.48 | 16.85 | 0.47 |
| 101.0608 | 19.67  | 15.07 | 14.66 | 14.81 | 14.77 | 0.40 |
| 101.5818 | 284.7  | 16.43 | 16.90 | 16.89 | 16.30 | 0.32 |
| 101.9679 | 78.44  | 14.71 | 13.38 | 13.42 | 13.92 | 1.28 |
| 101.9807 | 142.33 | 16.30 | 14.65 | 14.41 | 14.67 | 1.71 |
| 102.0097 | 291.13 | 15.56 | 13.29 | 13.52 | 13.42 | 0.89 |
| 102.0195 | 291.14 | 17.08 | 17.09 | 17.14 | 17.48 | 0.13 |
| 102.0278 | 21.05  | 17.51 | 17.60 | 17.17 | 17.17 | 0.27 |
| 102.0461 | 223.47 | 17.40 | 17.73 | 17.81 | 16.67 | 0.32 |
| 102.0463 | 31     | 17.76 | 16.83 | 16.77 | 16.67 | 1.09 |
| 102.0561 | 18.97  | 20.59 | 21.46 | 21.26 | 21.05 | 1.42 |
| 102.7710 | 260.34 | 16.37 | 16.24 | 15.95 | 15.32 | 0.31 |
| 102.8200 | 261.1  | 14.43 | 14.78 | 14.18 | 12.92 | 0.06 |
| 102.9568 | 34.47  | 22.87 | 22.85 | 23.18 | 22.37 | 0.06 |
| 102.9627 | 67.91  | 17.40 | 16.13 | 18.18 | 17.83 | 0.25 |
| 103.0036 | 125.18 | 15.36 | 14.70 | 14.37 | 15.55 | 0.91 |
| 103.0037 | 20.37  | 16.76 | 17.56 | 17.50 | 17.60 | 1.09 |
| 103.0175 | 211.62 | 13.76 | 9.11  | 8.70  | 9.15  | 1.63 |
| 103.0221 | 179.7  | 16.82 | 17.28 | 17.91 | 17.07 | 0.54 |
| 103.0285 | 136.24 | 14.94 | 14.70 | 14.23 | 14.49 | 0.44 |
| 103.0302 | 214.83 | 15.75 | 9.20  | 9.51  | 9.81  | 1.91 |
| 103.0310 | 127.63 | 13.63 | 14.24 | 14.04 | 14.35 | 0.56 |
| 103.0400 | 144.95 | 20.90 | 23.06 | 22.89 | 22.54 | 1.10 |
| 103.0594 | 19.61  | 15.02 | 15.65 | 15.27 | 15.34 | 0.75 |
| 103.4887 | 232.7  | 15.00 | 11.11 | 10.68 | 11.51 | 2.13 |
| 103.9253 | 257.52 | 16.33 | 16.06 | 16.35 | 16.03 | 0.24 |
| 103.9601 | 32.11  | 15.67 | 14.94 | 15.38 | 14.81 | 0.79 |
| 103.9729 | 256.83 | 14.80 | 14.81 | 14.79 | 14.19 | 0.05 |
| 104.0253 | 287.07 | 19.34 | 17.91 | 18.08 | 17.97 | 1.67 |
| 104.0255 | 85.08  | 17.01 | 14.82 | 15.24 | 15.76 | 1.92 |
| 104.0299 | 105.86 | 15.02 | 13.86 | 13.89 | 13.95 | 1.05 |
| 104.0343 | 183.65 | 17.71 | 18.78 | 18.13 | 18.54 | 0.39 |
| 104.0352 | 27.37  | 21.21 | 20.72 | 20.99 | 20.90 | 0.81 |
| 104.0433 | 132.3  | 16.61 | 18.27 | 17.18 | 16.95 | 0.74 |
| 104.0434 | 24.76  | 17.59 | 17.67 | 16.82 | 16.71 | 0.47 |
| 104.0618 | 159.44 | 15.08 | 13.61 | 13.59 | 13.96 | 1.58 |
| 104.0620 | 27.51  | 17.69 | 16.89 | 16.84 | 16.61 | 0.94 |
| 104.9539 | 34.27  | 21.21 | 21.18 | 21.56 | 20.72 | 0.08 |
| 104.9609 | 24.83  | 14.32 | 14.41 | 14.34 | 13.73 | 0.02 |
| 105.0192 | 287.39 | 17.92 | 17.86 | 17.97 | 18.29 | 0.07 |
| 105.0193 | 163.56 | 18.18 | 19.92 | 20.52 | 20.42 | 1.14 |
| 105.0378 | 225.03 | 22.85 | 21.50 | 21.25 | 22.10 | 0.83 |
| 105.0457 | 259.9  | 21.04 | 18.45 | 18.67 | 18.72 | 2.16 |
| 105.9571 | 30.25  | 12.97 | 12.78 | 13.33 | 12.26 | 0.02 |
| 105.9604 | 92.37  | 15.34 | 13.97 | 14.37 | 14.44 | 1.19 |
| 106.0048 | 210.35 | 13.96 | 8.87  | 8.78  | 9.67  | 1.41 |
| 106.0410 | 290.75 | 27.25 | 25.90 | 26.20 | 25.95 | 1.52 |
| 106.0695 | 19.53  | 14.99 | 15.43 | 15.26 | 14.97 | 0.34 |
| 106.4801 | 267.22 | 17.30 | 16.85 | 16.38 | 16.30 | 0.84 |
| 106.9809 | 22.02  | 18.67 | 19.34 | 19.17 | 19.12 | 1.35 |
| 106.9862 | 69.01  | 13.89 | 14.94 | 12.02 | 12.66 | 0.33 |
| 107.0249 | 286.89 | 20.99 | 19.69 | 19.94 | 19.66 | 1.55 |
| 107.0251 | 30.4   | 18.60 | 17.71 | 17.01 | 17.27 | 1.60 |
| 107.0362 | 292.16 | 24.23 | 22.35 | 22.51 | 22.25 | 1.90 |
| 107.0363 | 18.09  | 18.87 | 18.35 | 18.27 | 18.18 | 1.00 |
| 107.0420 | 156.42 | 15.31 | 15.74 | 15.46 | 15.18 | 0.29 |

|          |        |       |       |       |       |      |
|----------|--------|-------|-------|-------|-------|------|
| 107.0442 | 285.93 | 23.01 | 21.27 | 21.48 | 21.30 | 2.00 |
| 107.0501 | 219.43 | 17.67 | 17.60 | 17.48 | 17.38 | 0.25 |
| 107.0533 | 129.68 | 14.45 | 13.64 | 13.38 | 13.85 | 1.04 |
| 107.0614 | 212.49 | 15.80 | 8.80  | 9.79  | 9.87  | 1.51 |
| 107.9370 | 270.17 | 19.39 | 19.02 | 19.21 | 19.24 | 0.39 |
| 107.9922 | 270.06 | 17.60 | 16.93 | 17.17 | 17.40 | 0.75 |
| 108.0090 | 207.98 | 14.07 | 8.46  | 7.57  | 8.78  | 1.78 |
| 108.0091 | 91.26  | 15.44 | 13.78 | 13.80 | 14.10 | 1.63 |
| 108.0125 | 24.83  | 18.47 | 18.79 | 19.29 | 19.11 | 0.61 |
| 108.0202 | 291.6  | 20.42 | 19.55 | 19.61 | 19.27 | 1.39 |
| 108.0205 | 23.25  | 19.62 | 18.40 | 18.50 | 19.24 | 1.25 |
| 108.0292 | 292.03 | 17.23 | 17.35 | 17.33 | 17.49 | 0.23 |
| 108.0332 | 290.53 | 16.59 | 14.98 | 15.72 | 15.81 | 0.60 |
| 108.0395 | 291.94 | 18.95 | 16.42 | 16.34 | 16.45 | 2.13 |
| 108.0454 | 212.92 | 18.45 | 17.67 | 17.71 | 18.23 | 0.77 |
| 108.0566 | 259.05 | 19.61 | 16.77 | 16.97 | 16.83 | 2.17 |
| 108.0567 | 78.83  | 17.08 | 14.54 | 14.67 | 15.26 | 1.94 |
| 108.4152 | 296.72 | 14.85 | 15.51 | 16.10 | 15.71 | 0.99 |
| 108.4709 | 296.9  | 13.20 | 13.62 | 14.10 | 13.94 | 0.56 |
| 108.9019 | 119.7  | 16.01 | 15.38 | 15.48 | 15.97 | 0.84 |
| 108.9020 | 39.75  | 19.28 | 16.55 | 16.63 | 17.49 | 1.22 |
| 108.9906 | 134.26 | 14.21 | 13.33 | 13.10 | 13.71 | 1.07 |
| 109.0042 | 291.5  | 16.62 | 16.46 | 16.36 | 16.26 | 0.30 |
| 109.0043 | 82.06  | 16.48 | 14.05 | 14.52 | 14.99 | 1.73 |
| 109.0237 | 21.53  | 15.16 | 9.79  | 11.76 | 12.86 | 1.04 |
| 109.0294 | 164.8  | 16.42 | 16.38 | 16.59 | 16.60 | 0.10 |
| 109.0407 | 245    | 23.23 | 20.93 | 21.31 | 21.48 | 1.69 |
| 109.0407 | 24.23  | 20.43 | 19.24 | 19.30 | 19.46 | 1.57 |
| 109.0658 | 112.93 | 16.19 | 15.02 | 15.29 | 15.53 | 1.39 |
| 109.2398 | 265.22 | 17.18 | 17.12 | 17.07 | 16.91 | 0.12 |
| 109.2935 | 265.01 | 16.27 | 16.12 | 15.74 | 15.15 | 0.25 |
| 109.9860 | 50.93  | 15.71 | 15.40 | 15.75 | 15.69 | 0.24 |
| 110.0077 | 251.52 | 14.32 | 15.04 | 14.95 | 15.12 | 0.70 |
| 110.0246 | 289.22 | 17.22 | 16.92 | 16.85 | 17.10 | 0.61 |
| 110.0358 | 289.6  | 19.89 | 18.18 | 18.55 | 18.44 | 1.74 |
| 110.0360 | 25.14  | 18.09 | 16.83 | 16.57 | 16.72 | 1.79 |
| 110.0439 | 283.39 | 16.88 | 11.99 | 12.23 | 14.20 | 1.71 |
| 110.0723 | 219.11 | 16.00 | 10.15 | 10.57 | 10.73 | 1.36 |
| 110.5052 | 267.66 | 15.17 | 16.13 | 15.48 | 15.94 | 0.46 |
| 110.6097 | 272.12 | 16.56 | 16.26 | 16.19 | 16.01 | 0.39 |
| 110.8989 | 108.65 | 15.56 | 14.71 | 14.84 | 15.23 | 1.24 |
| 110.9756 | 290.68 | 15.15 | 17.00 | 16.72 | 16.40 | 1.26 |
| 110.9758 | 18     | 14.80 | 15.66 | 15.50 | 15.37 | 0.80 |
| 111.0063 | 113.04 | 14.67 | 13.72 | 13.57 | 14.54 | 0.81 |
| 111.0089 | 22.73  | 23.09 | 23.62 | 24.25 | 24.07 | 1.52 |
| 111.0199 | 274.46 | 21.57 | 21.54 | 21.60 | 21.65 | 0.01 |
| 111.0393 | 209.07 | 14.16 | 7.43  | 8.38  | 8.76  | 1.60 |
| 111.0451 | 185    | 17.93 | 17.60 | 17.69 | 17.96 | 0.57 |
| 111.0564 | 90.61  | 15.96 | 13.44 | 13.69 | 14.20 | 1.94 |
| 111.0814 | 168.41 | 16.19 | 14.85 | 15.01 | 15.53 | 1.62 |
| 111.9473 | 22.79  | 15.97 | 16.04 | 15.74 | 15.85 | 0.19 |
| 112.0038 | 291    | 16.30 | 16.65 | 16.72 | 17.13 | 0.61 |
| 112.0122 | 21.59  | 18.38 | 18.76 | 19.59 | 19.42 | 1.28 |
| 112.0151 | 290.62 | 16.66 | 17.63 | 17.42 | 17.36 | 1.35 |
| 112.0152 | 210.7  | 15.06 | 12.77 | 12.98 | 13.78 | 0.84 |
| 112.0233 | 172.27 | 16.52 | 16.67 | 17.06 | 16.80 | 0.55 |
| 112.0234 | 28.25  | 17.74 | 16.79 | 16.75 | 17.13 | 1.30 |
| 112.0402 | 289.75 | 17.10 | 16.87 | 16.85 | 17.06 | 0.42 |
| 112.0515 | 282.99 | 18.00 | 19.20 | 19.32 | 18.95 | 1.54 |
| 112.0516 | 36.57  | 17.41 | 18.62 | 18.38 | 17.63 | 1.06 |
| 112.9121 | 45.69  | 15.58 | 16.33 | 16.39 | 16.31 | 1.60 |
| 112.9152 | 45.73  | 15.30 | 15.79 | 15.89 | 15.95 | 1.07 |

|          |        |       |       |       |       |      |
|----------|--------|-------|-------|-------|-------|------|
| 112.9419 | 39.98  | 15.01 | 15.09 | 14.86 | 14.85 | 0.06 |
| 112.9462 | 46     | 15.24 | 15.30 | 15.28 | 15.36 | 0.11 |
| 112.9697 | 46.23  | 14.87 | 16.12 | 16.26 | 16.07 | 1.60 |
| 112.9856 | 46.06  | 27.77 | 28.75 | 28.85 | 28.71 | 1.77 |
| 112.9883 | 28.82  | 19.28 | 18.78 | 18.74 | 19.37 | 0.37 |
| 112.9991 | 292.29 | 17.98 | 17.82 | 17.95 | 18.14 | 0.13 |
| 113.0139 | 33.32  | 15.54 | 13.00 | 14.58 | 14.25 | 1.07 |
| 113.0243 | 291.04 | 18.94 | 18.44 | 18.38 | 18.54 | 0.86 |
| 113.0291 | 46.18  | 15.01 | 15.90 | 15.98 | 16.01 | 1.27 |
| 113.0355 | 288.81 | 17.75 | 17.46 | 17.61 | 17.81 | 0.37 |
| 113.0356 | 33.15  | 17.91 | 16.44 | 16.63 | 16.76 | 1.79 |
| 113.0436 | 106.51 | 16.41 | 14.38 | 14.39 | 15.26 | 1.42 |
| 113.0438 | 19.59  | 17.59 | 15.80 | 15.83 | 15.83 | 1.36 |
| 113.0607 | 293.91 | 16.87 | 16.78 | 16.70 | 16.82 | 0.28 |
| 113.0971 | 106.85 | 14.61 | 12.48 | 12.58 | 13.63 | 1.30 |
| 113.9806 | 49.04  | 17.50 | 16.48 | 16.74 | 17.23 | 1.26 |
| 113.9888 | 45.59  | 22.34 | 22.72 | 22.86 | 22.78 | 1.35 |
| 113.9914 | 26.85  | 15.77 | 15.66 | 15.89 | 15.31 | 0.05 |
| 114.0097 | 290.17 | 15.94 | 15.26 | 15.07 | 15.51 | 0.31 |
| 114.0195 | 280.51 | 18.21 | 18.12 | 18.18 | 18.40 | 0.06 |
| 114.0276 | 135.86 | 15.35 | 14.69 | 14.73 | 15.00 | 0.99 |
| 114.0278 | 21.54  | 16.58 | 16.40 | 16.07 | 16.14 | 0.64 |
| 114.0310 | 21.27  | 15.64 | 15.16 | 15.05 | 15.46 | 0.76 |
| 114.0559 | 284.64 | 17.82 | 17.86 | 17.93 | 17.66 | 0.08 |
| 114.0655 | 243.36 | 17.03 | 18.09 | 17.90 | 16.89 | 0.95 |
| 114.9006 | 46.19  | 13.85 | 14.62 | 14.40 | 14.59 | 0.82 |
| 114.9339 | 291.25 | 14.42 | 15.70 | 15.77 | 16.67 | 0.70 |
| 114.9340 | 131.99 | 15.97 | 13.79 | 13.65 | 14.23 | 1.88 |
| 114.9363 | 29.46  | 15.45 | 15.01 | 14.55 | 14.90 | 0.25 |
| 114.9898 | 46.89  | 20.93 | 21.56 | 21.65 | 21.55 | 1.80 |
| 115.0038 | 17.93  | 23.96 | 24.56 | 24.66 | 24.47 | 1.50 |
| 115.0148 | 292.88 | 16.65 | 16.29 | 16.44 | 16.41 | 0.41 |
| 115.0148 | 187.95 | 16.32 | 14.52 | 14.25 | 15.15 | 1.42 |
| 115.0229 | 121.11 | 15.57 | 15.05 | 15.31 | 15.40 | 0.51 |
| 115.0301 | 261.91 | 19.06 | 16.98 | 16.95 | 17.06 | 2.03 |
| 115.0301 | 87.66  | 16.90 | 14.46 | 15.11 | 15.40 | 2.03 |
| 115.0399 | 276.89 | 20.55 | 19.74 | 19.52 | 19.95 | 0.73 |
| 115.0511 | 287.45 | 17.36 | 16.86 | 16.84 | 17.32 | 0.74 |
| 115.0763 | 258.39 | 20.49 | 21.67 | 21.17 | 20.56 | 0.81 |
| 115.9206 | 170.73 | 15.55 | 13.97 | 13.84 | 14.31 | 1.64 |
| 116.0071 | 19.15  | 19.11 | 19.65 | 19.75 | 19.56 | 1.33 |
| 116.0253 | 291.24 | 21.10 | 19.68 | 19.89 | 19.80 | 1.64 |
| 116.0254 | 23.83  | 17.59 | 16.35 | 15.83 | 16.01 | 1.53 |
| 116.0351 | 291.1  | 18.56 | 18.12 | 18.34 | 18.88 | 0.24 |
| 116.0506 | 23.05  | 18.40 | 17.42 | 17.79 | 17.86 | 1.53 |
| 116.0716 | 284.35 | 20.78 | 20.66 | 20.75 | 20.65 | 0.19 |
| 116.0796 | 239.61 | 16.39 | 16.21 | 16.32 | 16.11 | 0.20 |
| 116.2795 | 252.43 | 15.06 | 14.03 | 14.74 | 14.48 | 0.51 |
| 116.9284 | 291.7  | 21.44 | 21.46 | 21.30 | 22.29 | 0.06 |
| 116.9284 | 158.51 | 21.44 | 19.56 | 19.82 | 19.88 | 1.35 |
| 116.9345 | 29.8   | 13.90 | 13.22 | 12.24 | 13.42 | 0.37 |
| 116.9723 | 167.06 | 19.04 | 16.70 | 16.39 | 17.33 | 1.81 |
| 117.0192 | 293.31 | 19.95 | 19.96 | 20.07 | 20.57 | 0.16 |
| 117.0345 | 189.55 | 16.10 | 15.14 | 14.90 | 15.09 | 1.39 |
| 117.0380 | 30.34  | 19.77 | 19.29 | 19.19 | 18.97 | 0.70 |
| 117.0384 | 171.1  | 16.90 | 17.13 | 18.35 | 17.57 | 0.85 |
| 117.0457 | 290.15 | 17.30 | 15.94 | 16.29 | 16.16 | 1.37 |
| 117.0556 | 288.33 | 19.03 | 18.11 | 18.15 | 18.67 | 1.10 |
| 117.0749 | 174.68 | 17.01 | 16.59 | 16.28 | 16.62 | 0.45 |
| 117.9285 | 291.14 | 17.34 | 17.36 | 17.08 | 18.31 | 0.02 |
| 117.9285 | 161.81 | 17.94 | 15.33 | 15.70 | 15.64 | 1.88 |
| 117.9547 | 118.11 | 15.54 | 15.01 | 15.08 | 14.23 | 0.75 |

|          |        |       |       |       |       |      |
|----------|--------|-------|-------|-------|-------|------|
| 118.0046 | 294.96 | 16.46 | 16.69 | 16.43 | 16.21 | 0.07 |
| 118.0226 | 121.95 | 15.86 | 15.09 | 15.74 | 15.96 | 0.60 |
| 118.0298 | 188.33 | 16.61 | 15.43 | 15.57 | 16.01 | 1.41 |
| 118.0413 | 24.7   | 24.03 | 23.77 | 23.70 | 23.44 | 0.44 |
| 118.0510 | 27.14  | 21.86 | 21.49 | 21.76 | 21.70 | 0.59 |
| 118.0589 | 140.25 | 15.36 | 14.34 | 14.51 | 14.99 | 1.09 |
| 118.9180 | 289.55 | 12.45 | 17.65 | 17.95 | 18.74 | 1.94 |
| 118.9268 | 290.57 | 13.84 | 14.82 | 13.69 | 15.80 | 0.31 |
| 118.9307 | 32.6   | 21.25 | 19.89 | 20.13 | 20.02 | 0.99 |
| 118.9420 | 109.31 | 18.85 | 19.13 | 19.03 | 18.74 | 0.25 |
| 118.9515 | 152.16 | 16.75 | 15.47 | 14.84 | 15.99 | 1.46 |
| 118.9576 | 83.51  | 15.87 | 15.63 | 15.65 | 15.23 | 0.49 |
| 118.9694 | 146.97 | 16.88 | 14.73 | 14.30 | 15.46 | 1.88 |
| 118.9792 | 29.21  | 14.84 | 14.67 | 14.06 | 14.06 | 0.40 |
| 119.0169 | 292.36 | 16.55 | 16.72 | 16.64 | 15.96 | 0.07 |
| 119.0249 | 286.3  | 18.87 | 17.84 | 17.89 | 17.75 | 1.47 |
| 119.0351 | 26.3   | 21.07 | 21.18 | 20.80 | 20.96 | 0.12 |
| 119.0356 | 289.29 | 19.08 | 17.92 | 17.86 | 18.53 | 1.41 |
| 119.0443 | 291.43 | 17.40 | 16.37 | 16.35 | 15.93 | 0.91 |
| 119.0487 | 291.18 | 18.02 | 16.48 | 16.44 | 16.66 | 1.77 |
| 119.0544 | 25.6   | 16.42 | 15.79 | 16.00 | 16.10 | 0.99 |
| 119.0613 | 261.87 | 19.21 | 16.85 | 17.08 | 16.93 | 2.09 |
| 119.9469 | 153.07 | 16.19 | 14.32 | 14.08 | 14.96 | 1.58 |
| 119.9759 | 292.55 | 15.30 | 16.71 | 16.28 | 16.96 | 0.77 |
| 120.0125 | 24.22  | 18.69 | 17.17 | 17.62 | 17.63 | 1.24 |
| 120.0201 | 288.92 | 19.78 | 19.03 | 19.24 | 18.69 | 1.18 |
| 120.0302 | 121.29 | 14.90 | 14.15 | 14.03 | 14.73 | 0.98 |
| 120.0329 | 210.05 | 14.51 | 10.22 | 9.77  | 9.23  | 1.06 |
| 120.0384 | 22.31  | 15.90 | 15.50 | 15.62 | 15.74 | 0.53 |
| 120.0442 | 289.98 | 16.53 | 13.66 | 13.60 | 13.50 | 1.61 |
| 120.0486 | 126.48 | 15.04 | 14.32 | 14.98 | 14.67 | 0.48 |
| 120.0566 | 268.14 | 23.11 | 21.23 | 21.54 | 21.56 | 1.81 |
| 120.0568 | 29.96  | 20.39 | 19.03 | 19.28 | 19.04 | 1.42 |
| 120.0664 | 282.72 | 21.48 | 19.62 | 19.37 | 20.26 | 1.34 |
| 120.9278 | 43.01  | 19.95 | 17.59 | 18.37 | 18.30 | 1.46 |
| 120.9445 | 163.98 | 13.45 | 10.77 | 11.99 | 11.76 | 1.09 |
| 120.9487 | 135.67 | 14.44 | 13.39 | 14.53 | 14.08 | 0.38 |
| 121.0042 | 292.12 | 15.87 | 15.90 | 15.95 | 15.17 | 0.03 |
| 121.0043 | 91.72  | 15.60 | 13.60 | 13.91 | 14.15 | 1.87 |
| 121.0154 | 291.53 | 15.19 | 16.04 | 16.02 | 14.71 | 0.43 |
| 121.0156 | 196.72 | 14.44 | 14.06 | 14.35 | 10.37 | 0.25 |
| 121.0159 | 20.98  | 19.16 | 18.11 | 18.25 | 17.27 | 1.07 |
| 121.0294 | 280.91 | 21.80 | 22.02 | 20.98 | 21.43 | 0.28 |
| 121.0325 | 286.96 | 16.44 | 16.58 | 16.44 | 16.86 | 0.19 |
| 121.0326 | 217.42 | 17.65 | 16.71 | 16.80 | 16.82 | 1.07 |
| 121.0405 | 291.94 | 19.20 | 17.64 | 18.03 | 18.05 | 1.71 |
| 121.0407 | 26.27  | 17.65 | 15.99 | 15.48 | 15.87 | 1.89 |
| 121.0518 | 287.98 | 22.61 | 20.97 | 21.01 | 20.91 | 1.77 |
| 121.0599 | 287.33 | 17.81 | 16.37 | 16.33 | 16.62 | 1.76 |
| 121.0600 | 93     | 16.15 | 14.12 | 14.11 | 15.03 | 1.81 |
| 121.0657 | 142.6  | 15.02 | 13.08 | 13.24 | 13.57 | 1.73 |
| 121.0698 | 175.39 | 16.27 | 15.52 | 15.27 | 15.92 | 1.08 |
| 121.9439 | 149.2  | 14.69 | 11.44 | 11.44 | 13.27 | 1.11 |
| 121.9920 | 24.29  | 16.66 | 15.04 | 14.89 | 15.41 | 1.16 |
| 121.9994 | 292.73 | 16.27 | 16.41 | 16.25 | 16.21 | 0.06 |
| 122.0246 | 232.49 | 19.03 | 18.68 | 18.60 | 18.86 | 0.31 |
| 122.0327 | 284.58 | 17.43 | 17.62 | 16.95 | 17.38 | 0.18 |
| 122.0358 | 289.63 | 22.08 | 20.78 | 20.86 | 20.71 | 1.76 |
| 122.0360 | 19.38  | 18.86 | 16.81 | 17.03 | 17.28 | 1.94 |
| 122.0451 | 25.09  | 18.79 | 18.49 | 18.46 | 18.16 | 0.47 |
| 122.0552 | 293.96 | 17.16 | 16.68 | 16.56 | 16.45 | 0.56 |
| 122.0610 | 190.57 | 15.88 | 14.61 | 14.67 | 15.03 | 1.50 |

|          |        |       |       |       |       |      |
|----------|--------|-------|-------|-------|-------|------|
| 122.9259 | 63.02  | 15.69 | 13.38 | 13.60 | 13.76 | 1.62 |
| 122.9602 | 68.2   | 14.38 | 15.39 | 12.84 | 13.35 | 0.24 |
| 122.9682 | 144.15 | 15.76 | 14.33 | 12.88 | 13.48 | 1.10 |
| 122.9756 | 290.35 | 18.30 | 16.53 | 16.48 | 17.59 | 1.54 |
| 122.9760 | 20.58  | 15.35 | 15.81 | 15.80 | 16.10 | 0.75 |
| 122.9853 | 28.24  | 16.14 | 18.86 | 18.90 | 18.10 | 2.13 |
| 123.0086 | 290.47 | 17.35 | 17.49 | 17.62 | 17.54 | 0.37 |
| 123.0198 | 292.39 | 18.86 | 18.05 | 18.24 | 17.90 | 1.16 |
| 123.0310 | 291.4  | 17.69 | 16.35 | 16.45 | 16.30 | 1.72 |
| 123.0392 | 290.39 | 16.45 | 14.86 | 15.37 | 15.39 | 0.90 |
| 123.0450 | 202.46 | 17.01 | 16.24 | 16.04 | 16.34 | 1.12 |
| 123.0486 | 25.13  | 23.55 | 23.49 | 23.40 | 23.07 | 0.21 |
| 123.0562 | 280.63 | 20.49 | 18.65 | 18.77 | 18.50 | 1.86 |
| 123.0563 | 23.22  | 17.96 | 16.46 | 16.39 | 16.88 | 1.82 |
| 123.0675 | 219.98 | 17.22 | 11.69 | 10.98 | 11.74 | 1.60 |
| 123.0814 | 185.69 | 16.03 | 15.31 | 15.49 | 15.86 | 1.07 |
| 123.9019 | 180.04 | 15.16 | 14.82 | 14.93 | 14.59 | 0.34 |
| 123.9023 | 24.07  | 16.92 | 17.22 | 16.33 | 16.98 | 0.05 |
| 123.9230 | 23.25  | 16.32 | 16.41 | 16.41 | 16.21 | 0.19 |
| 123.9266 | 23.49  | 16.04 | 16.07 | 15.94 | 15.82 | 0.12 |
| 123.9623 | 23.74  | 15.98 | 16.00 | 15.78 | 15.66 | 0.18 |
| 123.9890 | 23.74  | 16.08 | 16.10 | 16.12 | 15.90 | 0.00 |
| 124.0039 | 95.29  | 14.99 | 12.05 | 11.66 | 12.99 | 1.52 |
| 124.0074 | 26.24  | 28.29 | 28.92 | 28.78 | 28.60 | 1.30 |
| 124.0150 | 290.9  | 17.34 | 17.41 | 17.33 | 17.01 | 0.01 |
| 124.0154 | 27.35  | 16.58 | 15.76 | 15.94 | 16.13 | 0.72 |
| 124.0155 | 99.99  | 15.97 | 14.26 | 14.57 | 14.84 | 1.74 |
| 124.0269 | 23.67  | 16.37 | 16.57 | 16.53 | 15.67 | 0.07 |
| 124.0403 | 236.88 | 19.81 | 19.15 | 19.07 | 19.81 | 0.57 |
| 124.0515 | 261.79 | 22.24 | 19.97 | 20.17 | 20.05 | 2.11 |
| 124.0578 | 27.86  | 15.94 | 16.37 | 16.35 | 15.91 | 0.40 |
| 124.0885 | 23.52  | 15.95 | 15.82 | 15.93 | 15.75 | 0.18 |
| 124.0920 | 23.32  | 16.30 | 16.36 | 16.35 | 16.20 | 0.12 |
| 124.9879 | 121.93 | 15.21 | 14.61 | 14.77 | 15.07 | 0.71 |
| 124.9880 | 26.32  | 15.81 | 14.89 | 14.82 | 15.39 | 1.16 |
| 124.9913 | 17.16  | 19.78 | 20.20 | 19.72 | 19.83 | 0.35 |
| 124.9990 | 290.73 | 17.18 | 16.66 | 16.81 | 16.28 | 0.61 |
| 125.0044 | 19.08  | 19.52 | 19.72 | 19.68 | 19.61 | 0.73 |
| 125.0067 | 22.66  | 20.89 | 21.13 | 21.06 | 20.98 | 0.83 |
| 125.0106 | 22.69  | 22.76 | 23.02 | 22.94 | 22.82 | 0.69 |
| 125.0135 | 26.04  | 16.47 | 16.84 | 16.88 | 16.54 | 0.49 |
| 125.0177 | 25.15  | 17.37 | 17.75 | 18.49 | 17.84 | 0.98 |
| 125.0243 | 261.93 | 17.63 | 17.57 | 17.76 | 17.58 | 0.02 |
| 125.0355 | 291.46 | 18.80 | 18.26 | 18.37 | 18.05 | 0.72 |
| 125.0356 | 215.74 | 20.48 | 17.58 | 17.46 | 17.00 | 1.68 |
| 125.0356 | 38.89  | 18.68 | 17.65 | 17.08 | 17.55 | 1.24 |
| 125.0476 | 209.46 | 14.09 | 7.31  | 7.92  | 8.17  | 1.63 |
| 125.0526 | 32.07  | 15.44 | 14.83 | 15.06 | 14.73 | 0.52 |
| 125.0606 | 289.61 | 16.26 | 16.20 | 16.34 | 16.34 | 0.02 |
| 125.0720 | 213.16 | 14.31 | 10.95 | 10.19 | 10.37 | 0.88 |
| 125.0970 | 295.24 | 16.78 | 16.76 | 16.70 | 16.83 | 0.08 |
| 125.8998 | 29.91  | 15.72 | 16.15 | 14.68 | 15.51 | 0.10 |
| 125.9025 | 118.4  | 12.74 | 13.96 | 14.00 | 14.00 | 1.27 |
| 126.0031 | 23.14  | 23.98 | 24.23 | 24.18 | 24.04 | 0.66 |
| 126.0115 | 23     | 20.81 | 21.05 | 20.98 | 20.86 | 0.71 |
| 126.0195 | 293.51 | 16.95 | 16.93 | 16.79 | 17.33 | 0.03 |
| 126.0278 | 116.44 | 14.47 | 12.68 | 12.95 | 13.37 | 1.14 |
| 126.0307 | 290.74 | 16.92 | 16.86 | 16.97 | 16.60 | 0.07 |
| 126.0308 | 174.15 | 17.43 | 16.22 | 14.55 | 14.80 | 0.84 |
| 126.0390 | 93.83  | 15.65 | 12.78 | 13.02 | 13.65 | 1.67 |
| 126.0559 | 208.88 | 17.53 | 16.85 | 16.68 | 16.99 | 1.20 |
| 126.1004 | 131.71 | 15.00 | 13.25 | 13.23 | 13.84 | 1.37 |



|          |        |       |       |       |       |      |
|----------|--------|-------|-------|-------|-------|------|
| 126.9048 | 290.93 | 19.00 | 19.45 | 18.94 | 19.65 | 0.29 |
| 126.9050 | 175.34 | 17.65 | 20.73 | 14.72 | 15.71 | 0.05 |
| 126.9873 | 21.15  | 15.06 | 14.88 | 14.22 | 14.60 | 0.25 |
| 127.0013 | 51.54  | 24.57 | 23.99 | 24.23 | 24.28 | 0.69 |
| 127.0034 | 135.19 | 15.65 | 16.15 | 15.56 | 15.90 | 0.19 |
| 127.0066 | 23.05  | 17.64 | 17.82 | 17.83 | 17.60 | 0.46 |
| 127.0147 | 291.9  | 17.95 | 17.95 | 17.72 | 18.39 | 0.04 |
| 127.0232 | 21.96  | 14.54 | 14.50 | 13.00 | 14.08 | 0.24 |
| 127.0399 | 287.62 | 17.45 | 17.24 | 17.23 | 17.43 | 0.40 |
| 127.0508 | 199.65 | 18.61 | 16.20 | 15.81 | 16.59 | 1.79 |
| 127.0512 | 291.46 | 17.27 | 17.03 | 17.13 | 17.29 | 0.43 |
| 127.0595 | 20.08  | 14.18 | 14.29 | 13.95 | 13.65 | 0.05 |
| 127.0763 | 292.36 | 16.89 | 16.75 | 16.80 | 16.78 | 0.21 |
| 127.1127 | 172.09 | 16.95 | 16.02 | 16.23 | 16.41 | 1.19 |
| 127.8973 | 29.26  | 14.42 | 13.97 | 13.05 | 13.90 | 0.45 |
| 127.9017 | 107.85 | 12.97 | 14.94 | 15.28 | 15.01 | 1.74 |
| 127.9990 | 20.37  | 14.48 | 16.55 | 15.42 | 16.18 | 0.82 |
| 128.0045 | 183.29 | 17.66 | 16.80 | 16.85 | 17.25 | 1.17 |
| 128.0076 | 23.63  | 16.14 | 15.93 | 15.73 | 16.01 | 0.50 |
| 128.0182 | 137.78 | 14.80 | 14.24 | 14.18 | 14.92 | 0.67 |
| 128.0351 | 291.92 | 20.51 | 21.41 | 21.42 | 21.06 | 0.97 |
| 128.0355 | 17.36  | 23.56 | 23.57 | 23.57 | 24.00 | 0.12 |
| 128.0448 | 170.05 | 21.52 | 20.77 | 20.84 | 21.21 | 0.33 |
| 128.0448 | 234.29 | 18.89 | 19.27 | 18.97 | 19.37 | 0.15 |
| 128.0528 | 199.87 | 18.30 | 19.98 | 19.95 | 19.70 | 0.99 |
| 128.0715 | 290.5  | 16.28 | 16.05 | 16.13 | 16.27 | 0.23 |
| 128.8701 | 60.8   | 14.54 | 12.98 | 14.02 | 14.07 | 0.73 |
| 128.9595 | 50.19  | 27.15 | 27.54 | 28.01 | 27.88 | 1.25 |
| 128.9797 | 63.17  | 18.82 | 19.00 | 18.42 | 18.71 | 0.08 |
| 129.0054 | 180.48 | 15.46 | 14.35 | 14.35 | 14.68 | 1.16 |
| 129.0069 | 33.33  | 18.72 | 18.63 | 18.54 | 18.27 | 0.23 |
| 129.0168 | 175.79 | 16.66 | 18.61 | 17.80 | 18.35 | 0.76 |
| 129.0169 | 62.63  | 17.07 | 16.67 | 16.61 | 16.65 | 0.32 |
| 129.0194 | 25.2   | 23.83 | 24.65 | 24.72 | 24.73 | 1.59 |
| 129.0291 | 291.93 | 16.79 | 17.15 | 17.30 | 17.02 | 0.60 |
| 129.0326 | 20.3   | 15.20 | 13.68 | 13.90 | 14.02 | 0.73 |
| 129.0331 | 291.44 | 17.44 | 15.88 | 15.84 | 15.45 | 1.16 |
| 129.0387 | 20.31  | 19.13 | 18.99 | 19.02 | 19.43 | 0.12 |
| 129.0418 | 140.15 | 15.01 | 15.01 | 15.16 | 14.41 | 0.02 |
| 129.0455 | 59.97  | 15.44 | 12.52 | 14.53 | 14.63 | 1.33 |
| 129.0456 | 290    | 17.68 | 16.16 | 16.13 | 16.16 | 1.70 |
| 129.0492 | 62.21  | 15.01 | 14.84 | 14.23 | 14.37 | 0.48 |
| 129.0556 | 279    | 20.79 | 21.07 | 20.86 | 21.02 | 0.19 |
| 129.0919 | 271.74 | 18.53 | 19.77 | 19.84 | 19.37 | 1.73 |
| 129.1283 | 291.39 | 16.32 | 16.15 | 16.77 | 16.63 | 0.14 |
| 129.9546 | 55.91  | 16.35 | 14.68 | 15.80 | 16.21 | 1.20 |
| 129.9628 | 46.62  | 21.62 | 21.61 | 22.40 | 22.14 | 0.86 |
| 129.9757 | 150.11 | 17.82 | 16.45 | 16.28 | 16.25 | 1.61 |
| 129.9757 | 19.88  | 16.45 | 14.24 | 14.14 | 14.65 | 1.52 |
| 130.0144 | 291.86 | 14.35 | 15.92 | 15.86 | 16.12 | 1.08 |
| 130.0145 | 104.63 | 15.48 | 14.35 | 14.56 | 15.10 | 1.26 |
| 130.0145 | 196.63 | 14.91 | 13.00 | 13.03 | 14.43 | 1.04 |
| 130.0227 | 18.23  | 19.14 | 20.05 | 20.12 | 20.15 | 1.71 |
| 130.0258 | 87.61  | 15.31 | 14.12 | 14.19 | 13.94 | 1.24 |
| 130.0284 | 290.8  | 16.12 | 14.96 | 15.35 | 14.95 | 0.44 |
| 130.0330 | 95.11  | 15.67 | 14.74 | 15.27 | 14.60 | 1.00 |
| 130.0366 | 80.63  | 15.59 | 13.99 | 14.40 | 14.59 | 1.27 |
| 130.0409 | 291.49 | 23.26 | 21.97 | 22.11 | 21.96 | 1.51 |
| 130.0508 | 288.7  | 18.86 | 18.46 | 18.54 | 19.01 | 0.40 |
| 130.0604 | 240.64 | 20.77 | 20.14 | 20.13 | 20.22 | 0.37 |
| 130.0660 | 180.4  | 15.15 | 14.78 | 14.86 | 14.70 | 0.38 |
| 130.0872 | 220.28 | 23.52 | 22.86 | 22.80 | 22.31 | 0.61 |

|          |        |       |       |       |       |      |
|----------|--------|-------|-------|-------|-------|------|
| 130.0874 | 27.32  | 23.47 | 22.44 | 22.47 | 22.41 | 1.47 |
| 130.9576 | 45.93  | 23.58 | 23.57 | 24.35 | 24.08 | 0.81 |
| 130.9636 | 48.19  | 20.04 | 19.84 | 20.80 | 20.57 | 0.58 |
| 130.9992 | 20.82  | 15.87 | 16.01 | 15.92 | 15.80 | 0.11 |
| 131.0097 | 289.51 | 14.79 | 16.16 | 16.50 | 16.34 | 0.85 |
| 131.0238 | 20.98  | 15.78 | 16.47 | 16.56 | 16.68 | 1.01 |
| 131.0250 | 210.13 | 14.14 | 6.96  | 6.97  | 7.10  | 2.10 |
| 131.0351 | 21.12  | 20.39 | 20.55 | 20.42 | 20.68 | 0.30 |
| 131.0357 | 293.44 | 22.79 | 20.93 | 21.05 | 21.18 | 1.32 |
| 131.0443 | 286.59 | 19.23 | 18.48 | 18.71 | 18.09 | 1.33 |
| 131.0454 | 25.33  | 21.60 | 21.14 | 21.21 | 21.23 | 1.01 |
| 131.0542 | 157.52 | 16.63 | 15.86 | 16.06 | 16.24 | 0.72 |
| 131.0614 | 285.63 | 17.11 | 16.05 | 15.84 | 16.15 | 1.22 |
| 131.0657 | 24.67  | 15.94 | 15.28 | 15.28 | 15.55 | 0.69 |
| 131.0712 | 282.22 | 20.88 | 18.99 | 18.97 | 19.69 | 1.51 |
| 131.0826 | 36.12  | 18.71 | 18.57 | 18.42 | 18.76 | 0.16 |
| 131.0906 | 234.15 | 17.88 | 17.64 | 17.27 | 17.17 | 0.52 |
| 131.9609 | 56.63  | 17.02 | 16.94 | 17.77 | 17.52 | 0.72 |
| 131.9832 | 26.5   | 16.31 | 15.26 | 15.81 | 15.29 | 0.75 |
| 132.0126 | 24.24  | 15.29 | 12.87 | 13.97 | 15.36 | 0.57 |
| 132.0201 | 289.26 | 18.79 | 17.68 | 17.71 | 17.44 | 1.68 |
| 132.0203 | 19.65  | 15.75 | 13.88 | 13.95 | 14.28 | 1.97 |
| 132.0303 | 18.67  | 25.40 | 25.80 | 25.96 | 25.70 | 0.83 |
| 132.0390 | 198.29 | 16.69 | 13.63 | 12.12 | 12.62 | 1.33 |
| 132.0394 | 291.98 | 18.26 | 14.50 | 15.12 | 14.64 | 1.77 |
| 132.0566 | 283.36 | 22.69 | 21.15 | 21.42 | 21.56 | 1.73 |
| 132.0664 | 188.74 | 16.12 | 15.11 | 15.26 | 15.54 | 1.18 |
| 132.0746 | 187.48 | 16.18 | 15.46 | 15.24 | 16.13 | 0.99 |
| 132.0859 | 73.87  | 13.54 | 13.51 | 13.89 | 14.66 | 0.16 |
| 132.8677 | 195.45 | 17.98 | 17.64 | 17.82 | 17.53 | 0.34 |
| 132.9001 | 136.49 | 15.71 | 14.02 | 14.12 | 14.37 | 1.52 |
| 132.9465 | 22.64  | 20.12 | 21.17 | 21.09 | 21.12 | 1.75 |
| 132.9617 | 57.51  | 15.31 | 14.75 | 15.67 | 15.60 | 0.16 |
| 133.0142 | 19.15  | 26.08 | 27.05 | 27.07 | 27.05 | 1.64 |
| 133.0334 | 22.31  | 20.41 | 20.77 | 20.81 | 20.57 | 0.65 |
| 133.0405 | 281.55 | 19.11 | 17.74 | 17.86 | 18.01 | 1.66 |
| 133.0518 | 282.04 | 23.04 | 21.67 | 21.81 | 21.55 | 1.57 |
| 133.0599 | 257.88 | 19.01 | 16.82 | 16.95 | 16.96 | 1.99 |
| 133.0771 | 211.61 | 15.34 | 11.61 | 11.20 | 12.03 | 2.06 |
| 133.9803 | 32.75  | 13.74 | 13.65 | 13.90 | 13.49 | 0.01 |
| 133.9995 | 292.19 | 15.45 | 16.23 | 16.46 | 14.62 | 0.34 |
| 133.9996 | 210.56 | 13.59 | 6.95  | 7.04  | 7.24  | 1.69 |
| 134.0247 | 185.67 | 15.53 | 14.63 | 14.51 | 15.33 | 1.01 |
| 134.0357 | 25.81  | 19.73 | 18.93 | 18.87 | 18.64 | 0.98 |
| 134.0358 | 290.45 | 22.64 | 21.61 | 21.62 | 21.51 | 1.42 |
| 134.0471 | 243.12 | 20.08 | 21.19 | 21.17 | 20.96 | 1.16 |
| 134.0551 | 290.22 | 17.97 | 16.44 | 16.39 | 16.50 | 1.66 |
| 134.0596 | 289.52 | 20.13 | 18.44 | 18.77 | 18.42 | 1.92 |
| 134.0610 | 20.68  | 14.29 | 17.25 | 12.17 | 13.17 | 0.25 |
| 134.0722 | 258.23 | 20.55 | 18.15 | 18.36 | 18.25 | 2.23 |
| 134.0736 | 20.03  | 16.86 | 18.20 | 17.16 | 17.18 | 0.83 |
| 134.8654 | 185.77 | 16.57 | 15.98 | 15.65 | 15.56 | 0.63 |
| 134.8945 | 169.33 | 20.43 | 19.15 | 19.20 | 19.51 | 0.92 |
| 134.8946 | 243.68 | 17.46 | 17.49 | 17.93 | 18.39 | 0.21 |
| 134.9434 | 16.91  | 18.50 | 19.47 | 19.45 | 19.47 | 1.67 |
| 134.9730 | 173.12 | 16.11 | 15.90 | 15.83 | 16.30 | 0.37 |
| 135.0189 | 21.67  | 19.22 | 19.91 | 20.07 | 19.97 | 1.42 |
| 135.0198 | 289.85 | 17.95 | 14.43 | 14.47 | 14.70 | 1.79 |
| 135.0306 | 22.25  | 25.05 | 24.78 | 24.90 | 25.18 | 0.29 |
| 135.0392 | 291.5  | 17.25 | 16.15 | 16.25 | 16.19 | 1.19 |
| 135.0393 | 80.14  | 16.27 | 14.70 | 14.89 | 15.09 | 1.61 |
| 135.0450 | 267.55 | 20.22 | 19.77 | 19.80 | 19.85 | 0.69 |

|          |        |       |       |       |       |      |
|----------|--------|-------|-------|-------|-------|------|
| 135.0496 | 151.71 | 15.04 | 15.34 | 15.83 | 15.66 | 0.22 |
| 135.0562 | 275.05 | 18.08 | 16.96 | 17.08 | 16.85 | 1.53 |
| 135.0675 | 257.83 | 19.40 | 17.10 | 17.33 | 17.04 | 2.00 |
| 135.0815 | 108.52 | 14.80 | 13.74 | 13.94 | 13.97 | 0.68 |
| 135.8947 | 131.23 | 17.10 | 15.04 | 15.34 | 15.71 | 1.63 |
| 135.9449 | 291.24 | 15.81 | 16.56 | 16.48 | 16.28 | 0.56 |
| 135.9709 | 96.83  | 15.39 | 14.31 | 14.31 | 14.62 | 1.38 |
| 136.0073 | 19.12  | 12.54 | 14.34 | 13.71 | 15.11 | 0.57 |
| 136.0150 | 290.3  | 17.41 | 17.40 | 17.53 | 17.08 | 0.01 |
| 136.0152 | 94.72  | 16.31 | 14.53 | 14.72 | 15.20 | 1.92 |
| 136.0283 | 25.17  | 17.59 | 15.80 | 15.84 | 16.60 | 1.52 |
| 136.0341 | 21.36  | 20.44 | 19.88 | 20.05 | 20.37 | 0.70 |
| 136.0403 | 258.63 | 17.64 | 17.29 | 17.31 | 17.68 | 0.53 |
| 136.0484 | 216.81 | 17.46 | 17.72 | 17.60 | 17.56 | 0.29 |
| 136.0516 | 218.89 | 22.30 | 19.36 | 19.50 | 19.42 | 1.92 |
| 136.0518 | 26.99  | 22.65 | 22.40 | 22.31 | 22.05 | 0.45 |
| 136.0596 | 208.74 | 15.09 | 9.06  | 9.07  | 9.59  | 1.46 |
| 136.0709 | 211.29 | 14.02 | 9.16  | 9.39  | 8.69  | 1.32 |
| 136.0713 | 21.85  | 15.03 | 16.06 | 14.92 | 15.56 | 0.40 |
| 136.8630 | 188.75 | 15.35 | 15.39 | 15.07 | 15.15 | 0.11 |
| 136.8632 | 17.95  | 16.85 | 16.57 | 16.41 | 16.78 | 0.33 |
| 136.8915 | 136.83 | 19.28 | 17.20 | 17.77 | 17.64 | 1.52 |
| 136.9177 | 25.02  | 16.44 | 16.02 | 16.02 | 16.54 | 0.60 |
| 136.9227 | 94.31  | 15.50 | 14.93 | 15.11 | 15.27 | 0.88 |
| 136.9643 | 290.95 | 16.59 | 18.95 | 18.99 | 18.49 | 1.80 |
| 136.9645 | 18.97  | 16.65 | 20.80 | 20.69 | 19.81 | 1.94 |
| 137.0103 | 293.15 | 12.80 | 16.46 | 16.40 | 15.13 | 1.42 |
| 137.0242 | 292.43 | 21.08 | 22.14 | 21.64 | 20.81 | 0.73 |
| 137.0355 | 288.17 | 18.97 | 18.96 | 19.15 | 18.38 | 0.02 |
| 137.0436 | 137.18 | 15.02 | 13.62 | 14.19 | 14.48 | 1.13 |
| 137.0467 | 290.89 | 17.93 | 16.61 | 16.96 | 16.73 | 1.46 |
| 137.0468 | 80.55  | 16.88 | 14.62 | 14.70 | 15.25 | 1.89 |
| 137.0549 | 90.26  | 16.12 | 14.05 | 14.08 | 14.53 | 1.92 |
| 137.0606 | 180.97 | 16.25 | 15.54 | 15.80 | 15.84 | 0.83 |
| 137.0720 | 246.28 | 17.46 | 16.25 | 16.29 | 15.42 | 1.06 |
| 137.0971 | 136.12 | 15.07 | 13.58 | 13.53 | 13.88 | 1.54 |
| 137.9865 | 291.09 | 16.80 | 16.48 | 16.34 | 16.85 | 0.51 |
| 138.0195 | 292.54 | 17.29 | 17.05 | 16.98 | 17.34 | 0.44 |
| 138.0276 | 291.35 | 16.32 | 16.51 | 16.49 | 15.03 | 0.00 |
| 138.0276 | 180.8  | 16.27 | 15.59 | 15.56 | 15.87 | 0.93 |
| 138.0307 | 292.58 | 18.88 | 18.01 | 18.22 | 17.90 | 1.19 |
| 138.0389 | 107.78 | 15.46 | 13.80 | 13.55 | 14.00 | 1.56 |
| 138.0559 | 276.74 | 17.25 | 16.89 | 16.75 | 17.53 | 0.40 |
| 138.0671 | 288.56 | 19.93 | 18.23 | 18.57 | 18.40 | 1.93 |
| 138.0672 | 27.28  | 17.41 | 16.58 | 16.05 | 16.39 | 1.32 |
| 138.1288 | 64.41  | 14.82 | 15.90 | 13.54 | 13.95 | 0.08 |
| 138.9148 | 27.45  | 14.04 | 14.71 | 14.86 | 15.13 | 0.43 |
| 138.9705 | 291.04 | 16.60 | 16.77 | 16.79 | 16.91 | 0.24 |
| 138.9801 | 129.12 | 15.60 | 16.19 | 16.34 | 17.27 | 0.78 |
| 138.9802 | 27     | 17.34 | 18.08 | 18.16 | 18.23 | 1.09 |
| 139.0035 | 290.18 | 16.13 | 16.74 | 16.55 | 16.79 | 0.64 |
| 139.0036 | 134.46 | 16.91 | 17.02 | 17.25 | 17.30 | 0.26 |
| 139.0147 | 291.28 | 16.29 | 16.81 | 16.58 | 16.73 | 0.57 |
| 139.0149 | 200.74 | 16.03 | 14.47 | 13.20 | 14.45 | 0.88 |
| 139.0150 | 63.79  | 17.71 | 17.16 | 14.19 | 15.22 | 1.17 |
| 139.0262 | 19.48  | 12.33 | 7.23  | 7.13  | 7.99  | 1.44 |
| 139.0399 | 292.07 | 17.02 | 16.87 | 16.79 | 17.11 | 0.31 |
| 139.0511 | 278.13 | 18.02 | 17.23 | 17.40 | 17.39 | 1.14 |
| 139.0625 | 88.6   | 15.42 | 13.81 | 14.02 | 14.40 | 1.57 |
| 139.0706 | 213.45 | 15.89 | 10.25 | 10.45 | 9.51  | 1.37 |
| 139.0764 | 178.19 | 16.61 | 16.38 | 16.41 | 16.59 | 0.30 |
| 139.1127 | 178.61 | 16.39 | 15.71 | 15.56 | 15.93 | 1.06 |

|          |        |       |       |       |       |      |
|----------|--------|-------|-------|-------|-------|------|
| 139.9846 | 23.99  | 17.30 | 16.45 | 16.82 | 17.05 | 0.84 |
| 139.9988 | 291.82 | 15.18 | 16.37 | 16.36 | 16.91 | 0.95 |
| 139.9988 | 131.72 | 14.46 | 13.77 | 13.71 | 14.57 | 0.75 |
| 140.0119 | 27.52  | 22.45 | 24.24 | 24.36 | 23.78 | 2.03 |
| 140.0253 | 289.88 | 16.80 | 16.08 | 16.43 | 16.67 | 0.30 |
| 140.0352 | 290.96 | 17.18 | 17.13 | 17.05 | 17.24 | 0.14 |
| 140.0464 | 287.63 | 18.04 | 17.45 | 17.66 | 17.44 | 0.89 |
| 140.0716 | 190.6  | 15.90 | 15.14 | 14.83 | 15.72 | 0.94 |
| 140.9071 | 117.42 | 13.37 | 15.05 | 15.14 | 15.04 | 1.71 |
| 140.9805 | 34.53  | 14.97 | 15.49 | 15.83 | 16.06 | 1.03 |
| 140.9860 | 163.84 | 16.39 | 16.38 | 16.23 | 16.27 | 0.12 |
| 140.9940 | 292.42 | 12.30 | 16.32 | 16.30 | 16.13 | 1.75 |
| 141.0167 | 292.21 | 20.98 | 20.75 | 20.69 | 20.92 | 0.36 |
| 141.0169 | 46.67  | 20.69 | 19.57 | 20.13 | 19.89 | 0.73 |
| 141.0192 | 287.58 | 18.11 | 16.88 | 17.18 | 17.50 | 0.97 |
| 141.0304 | 290.91 | 16.91 | 17.27 | 17.21 | 17.23 | 0.53 |
| 141.0458 | 211.7  | 14.88 | 9.37  | 9.53  | 9.31  | 1.22 |
| 141.0491 | 125.61 | 14.93 | 14.53 | 15.97 | 14.89 | 0.23 |
| 141.0556 | 288.88 | 17.32 | 17.06 | 17.15 | 17.25 | 0.36 |
| 141.0668 | 287.19 | 16.74 | 16.27 | 16.42 | 16.53 | 0.60 |
| 141.0669 | 207.18 | 17.82 | 15.47 | 15.25 | 15.70 | 1.94 |
| 141.0919 | 282.44 | 17.22 | 16.93 | 16.93 | 17.06 | 0.49 |
| 141.9078 | 113.15 | 13.34 | 14.90 | 14.97 | 14.93 | 1.77 |
| 142.0121 | 30.07  | 20.80 | 20.58 | 20.99 | 20.52 | 0.10 |
| 142.0144 | 291.92 | 14.96 | 16.52 | 16.02 | 15.61 | 0.73 |
| 142.0145 | 111.02 | 15.47 | 14.51 | 14.59 | 15.07 | 0.96 |
| 142.0155 | 18.3   | 14.96 | 16.10 | 16.26 | 15.58 | 1.48 |
| 142.0201 | 203.91 | 18.15 | 17.35 | 17.36 | 17.55 | 1.16 |
| 142.0202 | 40.63  | 15.95 | 13.17 | 13.52 | 13.72 | 0.93 |
| 142.0226 | 121.94 | 14.55 | 13.55 | 13.56 | 13.83 | 1.07 |
| 142.0262 | 18.45  | 14.25 | 11.51 | 10.96 | 12.41 | 1.63 |
| 142.0409 | 287.27 | 19.60 | 18.04 | 18.35 | 18.35 | 1.68 |
| 142.0508 | 283.29 | 19.97 | 19.38 | 19.43 | 19.54 | 0.96 |
| 142.0605 | 19.16  | 14.62 | 14.22 | 14.26 | 13.93 | 0.70 |
| 142.0663 | 25.97  | 17.15 | 16.16 | 16.46 | 16.55 | 1.45 |
| 142.0694 | 122.83 | 14.41 | 12.96 | 13.48 | 13.38 | 0.88 |
| 142.0873 | 102.38 | 15.25 | 13.78 | 13.87 | 14.01 | 1.41 |
| 142.9053 | 91.66  | 13.51 | 16.70 | 16.80 | 16.46 | 1.97 |
| 142.9492 | 150.3  | 15.99 | 14.71 | 14.92 | 15.35 | 1.25 |
| 142.9747 | 37.43  | 23.57 | 21.96 | 23.55 | 23.38 | 0.88 |
| 142.9751 | 228.94 | 18.79 | 20.66 | 20.55 | 20.18 | 1.31 |
| 142.9961 | 152.64 | 15.95 | 15.87 | 15.27 | 16.10 | 0.23 |
| 142.9961 | 54.66  | 18.13 | 18.31 | 18.86 | 19.32 | 0.60 |
| 142.9986 | 22.7   | 23.33 | 23.14 | 23.09 | 23.42 | 0.34 |
| 143.0155 | 36.21  | 14.83 | 14.29 | 14.46 | 14.61 | 0.43 |
| 143.0211 | 186.41 | 15.65 | 15.41 | 15.50 | 15.47 | 0.14 |
| 143.0350 | 26.82  | 21.39 | 21.59 | 21.21 | 21.24 | 0.01 |
| 143.0354 | 265.84 | 19.42 | 18.68 | 18.35 | 18.47 | 1.14 |
| 143.0457 | 194.81 | 17.27 | 15.38 | 15.09 | 15.91 | 1.53 |
| 143.0489 | 216.86 | 15.61 | 6.51  | 8.15  | 8.95  | 1.64 |
| 143.0542 | 165.64 | 16.66 | 16.14 | 16.60 | 16.37 | 0.48 |
| 143.0614 | 211.82 | 16.04 | 12.78 | 13.35 | 13.53 | 1.66 |
| 143.0712 | 262.82 | 19.96 | 19.42 | 19.25 | 19.70 | 0.62 |
| 143.1076 | 264.9  | 19.08 | 21.43 | 21.42 | 20.48 | 1.98 |
| 143.9785 | 63.77  | 18.18 | 16.16 | 17.59 | 17.57 | 1.36 |
| 143.9914 | 140.88 | 15.21 | 14.19 | 13.83 | 14.07 | 0.77 |
| 144.0021 | 25.27  | 18.59 | 18.28 | 18.31 | 18.68 | 0.44 |
| 144.0123 | 157.64 | 15.72 | 15.40 | 15.45 | 15.76 | 0.32 |
| 144.0202 | 291.78 | 17.45 | 16.47 | 16.42 | 16.53 | 1.29 |
| 144.0303 | 290.87 | 16.60 | 16.83 | 16.61 | 17.15 | 0.25 |
| 144.0304 | 20.39  | 16.53 | 16.87 | 16.69 | 16.58 | 0.60 |
| 144.0402 | 290.5  | 16.38 | 16.20 | 16.26 | 16.63 | 0.11 |

|          |        |       |       |       |       |      |
|----------|--------|-------|-------|-------|-------|------|
| 144.0403 | 189.02 | 17.77 | 16.80 | 16.72 | 17.11 | 1.10 |
| 144.0454 | 241.16 | 19.57 | 19.60 | 19.37 | 19.85 | 0.02 |
| 144.0566 | 264.57 | 21.46 | 19.22 | 19.44 | 19.70 | 1.92 |
| 144.0664 | 282.84 | 18.81 | 18.08 | 17.94 | 18.31 | 0.82 |
| 144.0746 | 182.82 | 17.33 | 16.78 | 16.82 | 17.43 | 0.76 |
| 144.1029 | 190.48 | 17.59 | 20.19 | 20.02 | 19.20 | 1.94 |
| 144.1109 | 217.01 | 16.12 | 16.48 | 16.53 | 16.25 | 0.51 |
| 144.9044 | 121.16 | 16.04 | 18.47 | 19.35 | 18.41 | 1.89 |
| 144.9544 | 50.23  | 22.40 | 19.83 | 23.07 | 22.87 | 0.76 |
| 144.9675 | 24.35  | 15.07 | 14.23 | 14.42 | 14.58 | 0.67 |
| 144.9756 | 86.85  | 18.00 | 17.18 | 15.28 | 15.93 | 0.99 |
| 144.9819 | 38.55  | 16.10 | 15.00 | 14.99 | 14.99 | 0.83 |
| 144.9909 | 161.67 | 14.87 | 13.97 | 12.93 | 14.03 | 0.68 |
| 145.0029 | 37.37  | 16.68 | 16.91 | 17.25 | 17.38 | 0.93 |
| 145.0144 | 20     | 20.35 | 22.01 | 21.75 | 22.03 | 1.55 |
| 145.0153 | 289.98 | 16.69 | 16.34 | 15.89 | 15.64 | 0.38 |
| 145.0240 | 116.69 | 15.59 | 14.58 | 15.05 | 14.63 | 0.91 |
| 145.0252 | 290.72 | 12.51 | 15.41 | 14.67 | 16.49 | 1.10 |
| 145.0293 | 184.76 | 14.99 | 14.03 | 13.97 | 14.40 | 1.11 |
| 145.0400 | 290.32 | 16.23 | 15.31 | 15.30 | 15.60 | 0.72 |
| 145.0407 | 191.79 | 16.81 | 14.30 | 14.13 | 14.53 | 1.79 |
| 145.0513 | 291.26 | 24.47 | 22.44 | 22.62 | 21.96 | 1.66 |
| 145.0619 | 25.97  | 24.53 | 24.76 | 24.78 | 24.76 | 0.67 |
| 145.0698 | 152.67 | 17.12 | 16.31 | 16.61 | 16.53 | 0.85 |
| 145.0772 | 214.31 | 14.57 | 8.12  | 8.94  | 8.72  | 1.49 |
| 145.0868 | 262.12 | 18.13 | 17.41 | 17.44 | 17.51 | 0.84 |
| 145.0982 | 53.44  | 20.94 | 20.82 | 22.38 | 22.27 | 0.50 |
| 145.1062 | 192.03 | 12.16 | 14.87 | 14.80 | 14.17 | 1.14 |
| 145.9496 | 133.4  | 15.67 | 15.38 | 15.32 | 14.61 | 0.61 |
| 145.9579 | 74.65  | 15.78 | 15.20 | 16.10 | 15.96 | 0.26 |
| 145.9706 | 142.91 | 15.09 | 12.83 | 12.90 | 13.03 | 1.12 |
| 145.9920 | 21.21  | 15.82 | 15.33 | 15.20 | 16.10 | 0.24 |
| 145.9990 | 29.67  | 16.08 | 14.60 | 14.98 | 14.88 | 1.24 |
| 146.0178 | 19.4   | 15.46 | 16.79 | 16.64 | 16.99 | 1.15 |
| 146.0246 | 282.26 | 16.97 | 16.69 | 16.75 | 16.97 | 0.54 |
| 146.0283 | 22.01  | 15.99 | 17.18 | 16.66 | 17.45 | 0.81 |
| 146.0358 | 291.13 | 20.47 | 18.99 | 19.05 | 18.93 | 1.78 |
| 146.0360 | 22.72  | 17.05 | 14.97 | 15.11 | 15.27 | 2.05 |
| 146.0459 | 20.99  | 25.67 | 26.76 | 26.60 | 26.39 | 1.64 |
| 146.0551 | 287.1  | 20.09 | 18.08 | 18.40 | 18.14 | 1.93 |
| 146.0589 | 25.04  | 16.28 | 15.88 | 15.90 | 16.19 | 0.70 |
| 146.0652 | 23.98  | 20.04 | 20.16 | 20.16 | 20.21 | 0.36 |
| 146.0723 | 262.02 | 21.21 | 18.67 | 18.91 | 18.67 | 2.15 |
| 146.0823 | 24.84  | 21.12 | 20.43 | 20.93 | 21.00 | 0.91 |
| 146.0903 | 139.82 | 15.19 | 13.58 | 13.66 | 14.37 | 1.40 |
| 146.0953 | 62.46  | 21.55 | 21.53 | 23.51 | 23.15 | 0.70 |
| 146.1015 | 73.72  | 15.91 | 16.46 | 17.33 | 17.64 | 0.89 |
| 146.4537 | 271.99 | 15.96 | 14.68 | 15.56 | 15.85 | 0.55 |
| 146.9047 | 108.95 | 13.12 | 15.16 | 15.20 | 14.95 | 1.78 |
| 146.9465 | 33.24  | 15.94 | 16.07 | 16.09 | 16.54 | 0.38 |
| 146.9526 | 60.48  | 18.16 | 17.20 | 18.85 | 18.59 | 0.17 |
| 146.9611 | 125.47 | 18.12 | 18.23 | 18.46 | 16.96 | 0.04 |
| 146.9659 | 169.52 | 16.70 | 14.65 | 14.29 | 14.92 | 1.37 |
| 146.9829 | 198.61 | 16.23 | 17.44 | 17.41 | 18.19 | 1.30 |
| 146.9831 | 24.76  | 20.88 | 20.89 | 21.18 | 20.80 | 0.11 |
| 146.9889 | 83.43  | 13.73 | 13.74 | 13.52 | 14.27 | 0.01 |
| 146.9952 | 20.44  | 16.62 | 15.95 | 15.79 | 15.65 | 0.80 |
| 147.0200 | 205    | 16.45 | 14.82 | 14.54 | 15.32 | 1.48 |
| 147.0209 | 124.03 | 15.88 | 13.89 | 13.70 | 13.93 | 1.40 |
| 147.0306 | 292.28 | 20.10 | 19.05 | 19.20 | 19.40 | 1.26 |
| 147.0393 | 255.7  | 18.60 | 18.72 | 18.75 | 18.18 | 0.10 |
| 147.0448 | 181.01 | 17.32 | 18.19 | 16.68 | 16.94 | 0.14 |

|          |        |       |       |       |       |      |
|----------|--------|-------|-------|-------|-------|------|
| 147.0493 | 17.44  | 21.39 | 22.38 | 22.14 | 21.93 | 1.59 |
| 147.0563 | 285.19 | 17.07 | 15.92 | 16.13 | 16.20 | 1.16 |
| 147.0663 | 24.54  | 16.00 | 16.58 | 16.66 | 16.88 | 0.57 |
| 147.0675 | 279.74 | 22.45 | 20.52 | 20.60 | 20.90 | 1.89 |
| 147.0765 | 133.55 | 12.23 | 14.16 | 13.71 | 13.51 | 1.07 |
| 147.0857 | 23.85  | 16.36 | 15.75 | 15.96 | 16.11 | 0.83 |
| 147.0986 | 63.2   | 16.89 | 16.97 | 18.99 | 18.70 | 0.82 |
| 147.9864 | 28.63  | 14.60 | 14.63 | 14.80 | 14.88 | 0.09 |
| 148.0151 | 295.29 | 16.40 | 16.71 | 16.69 | 15.78 | 0.17 |
| 148.0157 | 18.85  | 14.31 | 11.27 | 11.15 | 11.89 | 1.63 |
| 148.0403 | 197.22 | 17.07 | 15.87 | 16.16 | 16.11 | 1.13 |
| 148.0437 | 167.01 | 16.45 | 16.84 | 17.14 | 17.38 | 0.60 |
| 148.0438 | 27.97  | 21.22 | 20.35 | 20.72 | 20.72 | 1.24 |
| 148.0517 | 26.18  | 21.22 | 20.43 | 20.17 | 20.06 | 1.41 |
| 148.0614 | 287.52 | 25.25 | 23.68 | 22.95 | 24.54 | 1.31 |
| 148.0708 | 291.11 | 17.59 | 16.62 | 16.73 | 16.92 | 1.22 |
| 148.0879 | 228.88 | 17.42 | 13.67 | 14.01 | 13.75 | 1.52 |
| 148.0978 | 56.06  | 14.41 | 11.82 | 14.01 | 14.09 | 0.94 |
| 148.1492 | 130.14 | 14.02 | 12.65 | 12.77 | 13.18 | 1.20 |
| 148.9801 | 26.14  | 19.21 | 19.12 | 19.42 | 18.98 | 0.02 |
| 148.9910 | 169.17 | 13.93 | 14.82 | 15.04 | 15.30 | 0.76 |
| 149.0094 | 229.56 | 17.66 | 18.20 | 18.32 | 18.30 | 0.91 |
| 149.0094 | 291.51 | 16.53 | 16.56 | 16.86 | 16.66 | 0.25 |
| 149.0102 | 18.98  | 15.38 | 15.74 | 15.17 | 15.89 | 0.13 |
| 149.0242 | 290.53 | 16.73 | 16.70 | 16.50 | 16.67 | 0.14 |
| 149.0243 | 171.01 | 17.46 | 17.23 | 17.46 | 17.50 | 0.17 |
| 149.0354 | 290.58 | 17.21 | 16.70 | 16.73 | 16.65 | 0.80 |
| 149.0457 | 22     | 18.50 | 19.36 | 18.98 | 19.33 | 0.69 |
| 149.0467 | 277.36 | 20.89 | 19.29 | 19.65 | 19.35 | 1.55 |
| 149.0552 | 25.64  | 24.29 | 24.10 | 24.02 | 23.76 | 0.33 |
| 149.0594 | 172.36 | 16.04 | 14.20 | 14.01 | 14.80 | 1.02 |
| 149.0605 | 283.65 | 16.85 | 16.70 | 16.36 | 16.58 | 0.49 |
| 149.0647 | 282.13 | 20.89 | 19.81 | 19.77 | 20.19 | 0.72 |
| 149.0831 | 286.58 | 16.98 | 16.80 | 16.70 | 16.45 | 0.20 |
| 149.0971 | 92.25  | 15.14 | 13.64 | 14.12 | 14.46 | 1.44 |
| 149.9959 | 293.42 | 16.14 | 16.74 | 16.70 | 15.76 | 0.35 |
| 150.0090 | 217.97 | 15.14 | 15.41 | 15.45 | 15.36 | 0.18 |
| 150.0196 | 131.91 | 14.99 | 13.95 | 13.99 | 14.14 | 1.18 |
| 150.0307 | 289.85 | 19.82 | 19.18 | 19.50 | 18.68 | 0.85 |
| 150.0397 | 27.2   | 16.00 | 15.52 | 15.38 | 15.52 | 0.69 |
| 150.0421 | 179.71 | 14.67 | 13.85 | 13.41 | 14.07 | 0.74 |
| 150.0422 | 23.51  | 16.97 | 16.50 | 17.03 | 16.84 | 0.23 |
| 150.0502 | 213.58 | 14.67 | 10.23 | 11.23 | 10.41 | 0.96 |
| 150.0559 | 178.58 | 17.94 | 17.30 | 17.34 | 17.67 | 1.04 |
| 150.0594 | 20.04  | 16.43 | 16.69 | 16.61 | 16.35 | 0.25 |
| 150.0669 | 246.82 | 21.46 | 19.13 | 19.41 | 19.03 | 1.99 |
| 150.5421 | 64.64  | 14.30 | 15.42 | 12.75 | 13.30 | 0.18 |
| 150.8868 | 25.3   | 16.87 | 15.79 | 15.48 | 16.39 | 0.94 |
| 150.9470 | 103.17 | 14.82 | 14.42 | 14.62 | 15.07 | 0.38 |
| 150.9623 | 131.52 | 16.85 | 16.26 | 15.78 | 16.56 | 0.85 |
| 150.9867 | 155.94 | 13.60 | 14.38 | 14.72 | 15.27 | 0.64 |
| 151.0071 | 18.32  | 13.82 | 11.80 | 11.92 | 14.51 | 1.04 |
| 151.0147 | 291.64 | 15.42 | 16.18 | 16.23 | 15.22 | 0.48 |
| 151.0262 | 26.34  | 24.84 | 24.18 | 24.25 | 24.87 | 0.55 |
| 151.0342 | 206.74 | 13.78 | 8.11  | 7.93  | 8.34  | 1.34 |
| 151.0399 | 265.48 | 17.32 | 17.17 | 17.26 | 17.47 | 0.14 |
| 151.0431 | 138.48 | 15.30 | 15.23 | 15.35 | 15.24 | 0.03 |
| 151.0511 | 289.94 | 17.76 | 17.02 | 16.92 | 17.16 | 1.30 |
| 151.0620 | 22.07  | 21.13 | 21.76 | 21.64 | 21.27 | 0.70 |
| 151.0624 | 291.1  | 17.59 | 16.93 | 16.98 | 16.92 | 1.05 |
| 151.0706 | 225.93 | 17.91 | 15.32 | 15.20 | 14.09 | 1.55 |
| 151.0763 | 199.49 | 16.57 | 15.50 | 15.70 | 15.86 | 1.36 |

|          |        |       |       |       |       |      |
|----------|--------|-------|-------|-------|-------|------|
| 151.1127 | 148.25 | 15.33 | 13.81 | 13.48 | 13.95 | 1.57 |
| 152.0022 | 288.59 | 16.82 | 17.05 | 17.35 | 17.14 | 0.37 |
| 152.0024 | 17.57  | 21.74 | 24.00 | 23.45 | 23.43 | 1.60 |
| 152.0100 | 292.54 | 14.84 | 16.38 | 16.29 | 15.04 | 0.78 |
| 152.0233 | 24.09  | 18.35 | 16.91 | 17.03 | 17.90 | 1.26 |
| 152.0295 | 20.13  | 20.49 | 19.48 | 19.64 | 20.31 | 0.89 |
| 152.0352 | 288.11 | 16.80 | 16.50 | 16.39 | 16.61 | 0.38 |
| 152.0352 | 174.66 | 17.80 | 17.56 | 17.81 | 18.18 | 0.13 |
| 152.0434 | 135.22 | 14.88 | 13.84 | 13.32 | 13.88 | 1.27 |
| 152.0464 | 290.3  | 19.64 | 18.82 | 19.24 | 18.61 | 0.81 |
| 152.0716 | 140.33 | 15.52 | 14.26 | 14.73 | 14.86 | 1.02 |
| 152.8838 | 25.37  | 16.63 | 15.71 | 15.10 | 16.23 | 0.76 |
| 152.9391 | 179.37 | 15.18 | 14.75 | 14.75 | 14.51 | 0.59 |
| 152.9781 | 144.62 | 19.91 | 20.93 | 20.63 | 20.90 | 0.75 |
| 152.9781 | 33.57  | 19.92 | 21.68 | 21.67 | 21.37 | 1.52 |
| 152.9828 | 133.54 | 15.29 | 15.56 | 15.71 | 15.55 | 0.63 |
| 152.9957 | 172.43 | 16.30 | 15.70 | 15.76 | 15.74 | 1.36 |
| 152.9959 | 16.97  | 21.41 | 21.32 | 21.46 | 21.21 | 0.10 |
| 153.0018 | 19.61  | 14.17 | 15.71 | 15.16 | 15.27 | 0.96 |
| 153.0058 | 20.67  | 18.17 | 18.98 | 18.51 | 18.57 | 0.60 |
| 153.0194 | 20.89  | 17.32 | 17.23 | 17.30 | 17.36 | 0.06 |
| 153.0304 | 289.6  | 17.33 | 17.37 | 17.27 | 17.10 | 0.05 |
| 153.0417 | 99.86  | 15.64 | 13.90 | 14.04 | 14.51 | 1.71 |
| 153.0499 | 208.33 | 14.34 | 9.86  | 10.62 | 9.10  | 1.02 |
| 153.0556 | 288.11 | 16.74 | 16.53 | 16.70 | 16.66 | 0.19 |
| 153.0557 | 183.87 | 17.69 | 17.50 | 17.59 | 17.95 | 0.21 |
| 153.0590 | 27.83  | 16.28 | 15.79 | 15.63 | 15.53 | 0.76 |
| 153.0670 | 208.85 | 17.83 | 15.46 | 15.23 | 15.73 | 1.89 |
| 153.0782 | 209.37 | 14.82 | 8.42  | 7.22  | 7.36  | 1.56 |
| 153.0920 | 289.94 | 17.07 | 16.72 | 16.78 | 16.86 | 0.58 |
| 153.1284 | 130.27 | 14.93 | 14.25 | 14.36 | 14.51 | 0.91 |
| 153.9815 | 50.23  | 14.82 | 15.51 | 15.19 | 15.41 | 0.60 |
| 153.9983 | 20.31  | 16.31 | 18.82 | 18.05 | 18.31 | 1.51 |
| 154.0066 | 19.67  | 13.25 | 15.71 | 14.83 | 15.09 | 1.10 |
| 154.0122 | 29.11  | 16.28 | 15.76 | 16.25 | 15.55 | 0.45 |
| 154.0144 | 291.57 | 15.98 | 16.33 | 16.23 | 16.56 | 0.38 |
| 154.0145 | 172.05 | 16.19 | 15.49 | 15.47 | 16.16 | 1.01 |
| 154.0181 | 22.23  | 14.39 | 15.53 | 15.20 | 15.01 | 0.80 |
| 154.0257 | 294.58 | 16.25 | 16.82 | 16.78 | 16.42 | 0.69 |
| 154.0258 | 103.91 | 16.04 | 14.07 | 14.17 | 14.93 | 1.74 |
| 154.0384 | 64.88  | 15.49 | 16.50 | 14.55 | 14.83 | 0.06 |
| 154.0409 | 291.26 | 17.14 | 16.34 | 16.63 | 16.50 | 0.49 |
| 154.0509 | 173.46 | 17.27 | 17.05 | 17.23 | 17.55 | 0.16 |
| 154.0577 | 24.54  | 20.61 | 20.47 | 20.40 | 20.08 | 0.27 |
| 154.0623 | 29.25  | 22.86 | 22.88 | 22.83 | 22.66 | 0.06 |
| 154.0873 | 194.23 | 16.04 | 15.22 | 15.02 | 15.85 | 0.91 |
| 154.8808 | 24.99  | 14.68 | 12.76 | 11.75 | 13.87 | 1.09 |
| 154.9155 | 94.1   | 15.44 | 15.90 | 15.74 | 15.54 | 0.74 |
| 154.9186 | 129.13 | 15.22 | 15.11 | 15.18 | 15.44 | 0.09 |
| 154.9283 | 24.68  | 20.82 | 21.13 | 21.08 | 21.45 | 0.60 |
| 154.9473 | 286.67 | 16.67 | 16.52 | 16.58 | 17.04 | 0.07 |
| 154.9751 | 117.15 | 17.62 | 18.75 | 18.11 | 19.05 | 0.68 |
| 154.9961 | 153.64 | 16.55 | 16.54 | 16.42 | 17.29 | 0.05 |
| 154.9962 | 51.04  | 18.02 | 18.70 | 19.19 | 19.20 | 1.39 |
| 155.0016 | 271.23 | 18.98 | 18.57 | 18.75 | 19.47 | 0.21 |
| 155.0097 | 290.65 | 17.27 | 16.77 | 16.91 | 17.49 | 0.50 |
| 155.0098 | 137.46 | 16.89 | 15.64 | 15.89 | 16.36 | 1.35 |
| 155.0099 | 20.16  | 17.38 | 16.66 | 17.01 | 17.34 | 0.73 |
| 155.0361 | 289.88 | 20.14 | 16.86 | 17.73 | 16.86 | 1.57 |
| 155.0461 | 292.51 | 17.01 | 17.00 | 16.92 | 17.11 | 0.05 |
| 155.0461 | 175.38 | 18.04 | 15.47 | 16.05 | 16.47 | 1.42 |
| 155.0545 | 20.87  | 18.35 | 18.58 | 17.75 | 17.93 | 0.13 |

|          |        |       |       |       |       |      |
|----------|--------|-------|-------|-------|-------|------|
| 155.0590 | 27.62  | 14.66 | 14.52 | 14.90 | 15.10 | 0.07 |
| 155.0654 | 48.74  | 17.32 | 17.70 | 17.74 | 17.80 | 0.70 |
| 155.0712 | 274.47 | 17.89 | 17.61 | 17.74 | 17.87 | 0.33 |
| 155.0824 | 290.14 | 15.57 | 16.67 | 16.64 | 16.89 | 1.00 |
| 155.0826 | 195.73 | 16.20 | 15.49 | 15.41 | 15.44 | 0.91 |
| 155.1076 | 282.82 | 18.39 | 16.85 | 16.96 | 16.98 | 1.50 |
| 155.9468 | 132.48 | 15.45 | 14.78 | 14.65 | 15.10 | 0.81 |
| 155.9914 | 92.33  | 14.57 | 13.30 | 13.94 | 14.31 | 0.84 |
| 156.0050 | 291.63 | 15.35 | 16.28 | 16.22 | 15.84 | 0.66 |
| 156.0278 | 34.47  | 20.06 | 19.32 | 20.02 | 19.50 | 0.59 |
| 156.0304 | 290.83 | 16.81 | 16.84 | 16.98 | 17.36 | 0.24 |
| 156.0409 | 290.08 | 15.40 | 14.98 | 15.83 | 15.79 | 0.01 |
| 156.0414 | 89.84  | 16.35 | 14.73 | 14.95 | 15.08 | 1.70 |
| 156.0535 | 27.96  | 15.22 | 15.35 | 15.10 | 14.74 | 0.04 |
| 156.0567 | 255.16 | 20.69 | 18.01 | 18.29 | 18.82 | 2.10 |
| 156.0567 | 75.34  | 17.31 | 15.21 | 15.69 | 15.80 | 1.92 |
| 156.0664 | 290.71 | 17.99 | 17.42 | 17.21 | 17.58 | 0.88 |
| 156.0765 | 115.02 | 14.54 | 13.82 | 13.97 | 13.16 | 0.58 |
| 156.1029 | 172.9  | 15.11 | 14.46 | 14.44 | 14.56 | 0.87 |
| 156.1396 | 18.87  | 15.73 | 17.25 | 14.84 | 15.09 | 0.34 |
| 156.8948 | 116.45 | 18.10 | 15.61 | 15.53 | 16.48 | 1.85 |
| 156.9254 | 24.3   | 19.06 | 19.28 | 19.34 | 19.66 | 0.53 |
| 156.9545 | 61.9   | 14.99 | 13.53 | 15.06 | 15.14 | 0.48 |
| 156.9675 | 27.65  | 14.72 | 14.75 | 14.66 | 15.42 | 0.07 |
| 156.9907 | 251.87 | 19.30 | 20.08 | 20.04 | 19.34 | 0.66 |
| 156.9908 | 53.53  | 19.58 | 16.75 | 17.80 | 17.92 | 1.38 |
| 157.0119 | 42.48  | 23.84 | 24.70 | 25.15 | 24.85 | 1.63 |
| 157.0253 | 291.75 | 15.78 | 16.94 | 16.72 | 16.87 | 1.03 |
| 157.0339 | 18.46  | 15.73 | 15.90 | 14.88 | 15.57 | 0.16 |
| 157.0368 | 24.01  | 20.33 | 20.60 | 20.13 | 20.29 | 0.12 |
| 157.0518 | 269.31 | 23.08 | 21.35 | 21.40 | 21.33 | 1.67 |
| 157.0608 | 288.53 | 15.62 | 14.31 | 15.33 | 15.38 | 0.35 |
| 157.0613 | 199.24 | 17.30 | 15.97 | 15.82 | 16.37 | 1.56 |
| 157.0699 | 113.94 | 16.08 | 14.47 | 14.72 | 14.58 | 1.38 |
| 157.0869 | 246.31 | 20.88 | 19.84 | 20.36 | 20.26 | 0.70 |
| 157.1233 | 257.24 | 21.00 | 21.60 | 20.96 | 20.44 | 0.24 |
| 157.9425 | 137.28 | 15.64 | 14.79 | 14.44 | 15.33 | 1.29 |
| 157.9861 | 44.76  | 18.25 | 16.97 | 17.49 | 16.99 | 0.82 |
| 158.0063 | 45.88  | 15.45 | 16.29 | 16.77 | 16.28 | 1.21 |
| 158.0152 | 39.23  | 18.85 | 19.76 | 20.16 | 19.88 | 1.60 |
| 158.0358 | 288.3  | 18.77 | 17.67 | 17.80 | 17.72 | 1.65 |
| 158.0362 | 90.43  | 16.88 | 14.93 | 15.55 | 15.80 | 1.99 |
| 158.0403 | 25.13  | 15.38 | 15.26 | 14.64 | 14.73 | 0.30 |
| 158.0460 | 18.33  | 17.17 | 16.51 | 16.47 | 16.77 | 0.70 |
| 158.0470 | 293.16 | 20.73 | 18.35 | 18.61 | 18.34 | 2.06 |
| 158.0552 | 290.03 | 18.75 | 17.06 | 17.03 | 17.14 | 2.01 |
| 158.0611 | 224.38 | 18.63 | 19.15 | 19.31 | 18.54 | 0.59 |
| 158.0723 | 267.67 | 19.49 | 17.32 | 17.50 | 17.40 | 2.09 |
| 158.0821 | 287.53 | 19.27 | 18.47 | 18.37 | 18.95 | 0.81 |
| 158.1266 | 215.02 | 17.80 | 17.06 | 16.84 | 17.26 | 1.10 |
| 158.8931 | 109.43 | 16.83 | 14.70 | 14.41 | 15.86 | 1.64 |
| 158.8931 | 30.71  | 17.36 | 14.51 | 14.08 | 16.29 | 2.01 |
| 158.9701 | 61.14  | 18.60 | 16.00 | 19.26 | 19.39 | 0.65 |
| 158.9785 | 130.77 | 14.54 | 17.04 | 18.00 | 16.06 | 1.32 |
| 158.9888 | 202.78 | 16.19 | 16.22 | 16.13 | 16.15 | 0.01 |
| 158.9890 | 55.75  | 16.12 | 12.09 | 13.07 | 12.77 | 1.22 |
| 159.0161 | 38.81  | 16.25 | 16.94 | 17.34 | 17.04 | 1.35 |
| 159.0310 | 293.38 | 18.46 | 16.79 | 17.31 | 15.36 | 0.86 |
| 159.0409 | 290.96 | 16.48 | 16.88 | 16.60 | 17.80 | 0.38 |
| 159.0411 | 110.08 | 15.43 | 14.15 | 14.25 | 15.02 | 1.39 |
| 159.0673 | 289.83 | 22.22 | 19.89 | 20.32 | 19.96 | 1.45 |
| 159.0773 | 140.58 | 16.48 | 14.71 | 14.21 | 14.99 | 1.56 |



|          |        |       |       |       |       |      |
|----------|--------|-------|-------|-------|-------|------|
| 159.0855 | 165.91 | 18.05 | 17.26 | 17.44 | 17.56 | 0.84 |
| 159.1025 | 249.83 | 19.83 | 18.39 | 18.50 | 18.68 | 1.24 |
| 159.1139 | 82.92  | 15.13 | 14.86 | 15.08 | 15.57 | 0.08 |
| 159.8938 | 151.71 | 14.05 | 15.20 | 14.58 | 16.96 | 0.63 |
| 159.8939 | 43.44  | 18.01 | 15.85 | 15.60 | 17.28 | 1.90 |
| 159.9381 | 129.35 | 15.36 | 14.39 | 14.05 | 15.07 | 1.17 |
| 159.9845 | 28.15  | 15.48 | 14.26 | 14.74 | 15.60 | 0.40 |
| 160.0219 | 37.97  | 15.92 | 16.45 | 16.89 | 16.34 | 0.97 |
| 160.0253 | 17.42  | 12.85 | 14.17 | 13.66 | 15.05 | 0.48 |
| 160.0403 | 162.34 | 16.43 | 15.56 | 15.90 | 16.00 | 0.98 |
| 160.0439 | 20.98  | 14.49 | 14.77 | 14.95 | 12.71 | 0.04 |
| 160.0515 | 270.75 | 20.08 | 17.81 | 17.87 | 18.06 | 1.93 |
| 160.0626 | 293.13 | 19.70 | 17.49 | 17.66 | 17.26 | 1.78 |
| 160.0708 | 289.93 | 17.87 | 14.91 | 15.95 | 13.99 | 1.18 |
| 160.1060 | 182.58 | 16.22 | 15.40 | 15.35 | 15.82 | 1.13 |
| 160.8926 | 156.17 | 10.02 | 14.74 | 13.35 | 16.49 | 1.37 |
| 160.8927 | 44.94  | 18.11 | 16.00 | 15.75 | 17.39 | 1.89 |
| 160.9155 | 27.88  | 15.04 | 15.30 | 14.99 | 14.76 | 0.05 |
| 160.9342 | 116.74 | 16.45 | 15.76 | 15.52 | 16.51 | 0.78 |
| 160.9766 | 161.84 | 16.37 | 14.79 | 14.53 | 14.42 | 1.28 |
| 160.9988 | 24     | 15.32 | 14.95 | 14.10 | 14.33 | 0.52 |
| 161.0093 | 20.68  | 19.24 | 18.98 | 18.70 | 19.24 | 0.48 |
| 161.0244 | 133.76 | 14.55 | 13.91 | 14.02 | 14.02 | 0.86 |
| 161.0357 | 178.6  | 16.37 | 14.44 | 14.40 | 15.07 | 1.72 |
| 161.0466 | 287.49 | 19.01 | 17.32 | 17.27 | 17.17 | 0.98 |
| 161.0607 | 157.11 | 14.65 | 14.05 | 13.68 | 14.16 | 0.79 |
| 161.0651 | 19.41  | 14.39 | 15.71 | 15.39 | 15.67 | 0.61 |
| 161.0721 | 211.07 | 14.93 | 8.95  | 8.54  | 8.80  | 1.47 |
| 161.0832 | 259.15 | 20.64 | 18.21 | 18.42 | 18.40 | 2.19 |
| 161.8940 | 108.39 | 17.05 | 14.91 | 14.67 | 16.18 | 1.72 |
| 161.8941 | 32.26  | 17.36 | 14.67 | 14.17 | 16.41 | 1.95 |
| 161.9445 | 119.08 | 15.21 | 14.77 | 14.42 | 14.53 | 0.69 |
| 161.9941 | 23.74  | 16.76 | 15.76 | 16.13 | 16.28 | 0.90 |
| 162.0196 | 132.86 | 15.52 | 14.09 | 14.23 | 14.99 | 1.22 |
| 162.0232 | 20.7   | 16.17 | 16.23 | 16.13 | 16.49 | 0.08 |
| 162.0307 | 289.97 | 18.10 | 17.60 | 17.70 | 17.19 | 0.79 |
| 162.0411 | 24.95  | 16.12 | 17.04 | 16.86 | 16.79 | 1.43 |
| 162.0420 | 290.75 | 17.01 | 15.78 | 16.04 | 15.95 | 0.57 |
| 162.0489 | 131.85 | 16.21 | 15.77 | 15.58 | 16.08 | 0.77 |
| 162.0558 | 217.13 | 18.09 | 16.60 | 16.38 | 17.34 | 1.08 |
| 162.0672 | 276.81 | 19.76 | 18.26 | 18.48 | 18.42 | 1.74 |
| 162.0673 | 30.26  | 17.59 | 16.29 | 15.19 | 15.51 | 1.58 |
| 162.0769 | 282.41 | 20.52 | 19.25 | 19.03 | 19.95 | 1.39 |
| 162.0866 | 216.89 | 15.91 | 10.94 | 11.07 | 10.30 | 1.16 |
| 162.8934 | 45.6   | 18.67 | 16.65 | 16.50 | 18.00 | 1.88 |
| 162.9126 | 27.81  | 14.25 | 14.31 | 13.63 | 14.03 | 0.17 |
| 162.9476 | 89.95  | 15.58 | 15.47 | 15.61 | 15.48 | 0.15 |
| 162.9571 | 35.05  | 18.34 | 16.36 | 16.85 | 16.47 | 0.85 |
| 162.9680 | 113.11 | 19.25 | 18.28 | 18.79 | 19.29 | 0.84 |
| 163.0250 | 25.3   | 18.19 | 19.58 | 19.50 | 19.21 | 1.36 |
| 163.0342 | 293.33 | 16.87 | 17.10 | 17.20 | 16.84 | 0.31 |
| 163.0400 | 176.8  | 17.60 | 17.17 | 17.28 | 17.37 | 0.68 |
| 163.0513 | 194.08 | 17.54 | 15.16 | 14.96 | 15.49 | 1.83 |
| 163.0624 | 284.87 | 22.54 | 21.04 | 21.23 | 20.97 | 1.70 |
| 163.0763 | 194.1  | 16.59 | 15.57 | 15.71 | 16.10 | 1.22 |
| 163.0805 | 119.24 | 16.92 | 15.88 | 15.79 | 16.45 | 1.36 |
| 163.0989 | 213.69 | 15.87 | 9.53  | 9.94  | 10.13 | 1.92 |
| 163.1128 | 198.56 | 15.99 | 15.31 | 15.26 | 15.28 | 0.96 |
| 163.1128 | 96.39  | 15.22 | 13.03 | 13.70 | 14.10 | 1.40 |
| 163.9911 | 27.06  | 14.47 | 13.22 | 13.40 | 14.01 | 0.74 |
| 164.0000 | 31.82  | 16.38 | 16.60 | 16.35 | 16.20 | 0.12 |
| 164.0214 | 108.13 | 13.85 | 14.57 | 14.78 | 14.65 | 0.52 |

|          |        |       |       |       |       |      |
|----------|--------|-------|-------|-------|-------|------|
| 164.0281 | 130.22 | 14.82 | 15.37 | 15.81 | 14.90 | 0.81 |
| 164.0352 | 292.61 | 17.47 | 17.51 | 17.51 | 17.90 | 0.15 |
| 164.0389 | 23.95  | 17.10 | 17.34 | 18.55 | 19.07 | 0.94 |
| 164.0464 | 288.46 | 19.76 | 18.76 | 19.13 | 18.87 | 1.28 |
| 164.0466 | 26.82  | 17.88 | 16.65 | 15.93 | 16.08 | 1.58 |
| 164.0577 | 293.56 | 16.98 | 16.51 | 16.64 | 16.21 | 0.50 |
| 164.0658 | 289.24 | 17.70 | 16.41 | 16.51 | 16.38 | 1.38 |
| 164.0660 | 109.87 | 16.98 | 16.16 | 16.50 | 16.37 | 1.06 |
| 164.0718 | 28.85  | 22.72 | 21.93 | 22.18 | 22.33 | 1.23 |
| 164.0835 | 281.79 | 17.95 | 17.18 | 17.15 | 17.31 | 0.95 |
| 164.8363 | 17.83  | 17.63 | 16.59 | 16.58 | 17.94 | 0.77 |
| 164.8955 | 108.59 | 17.06 | 14.86 | 14.73 | 16.43 | 1.68 |
| 164.8955 | 30.76  | 17.48 | 14.75 | 14.26 | 16.47 | 1.98 |
| 164.9476 | 46.87  | 17.40 | 18.19 | 18.11 | 17.82 | 1.28 |
| 164.9571 | 32.56  | 21.91 | 22.61 | 22.72 | 22.46 | 1.46 |
| 164.9637 | 92     | 14.88 | 14.23 | 14.03 | 14.21 | 0.45 |
| 164.9781 | 148.4  | 16.39 | 15.29 | 14.71 | 15.54 | 1.28 |
| 165.0057 | 20.01  | 14.92 | 10.35 | 11.39 | 12.21 | 1.57 |
| 165.0192 | 293.38 | 18.97 | 17.94 | 17.75 | 18.12 | 1.48 |
| 165.0192 | 173.41 | 19.06 | 18.62 | 18.58 | 18.55 | 0.45 |
| 165.0315 | 97.88  | 15.28 | 13.60 | 14.10 | 14.14 | 1.34 |
| 165.0341 | 19.7   | 13.75 | 15.63 | 15.09 | 15.23 | 1.00 |
| 165.0408 | 18.05  | 20.59 | 21.33 | 21.32 | 21.25 | 1.41 |
| 165.0408 | 212.82 | 19.18 | 18.94 | 18.94 | 18.85 | 0.46 |
| 165.0412 | 294.33 | 17.79 | 17.48 | 17.96 | 17.49 | 0.22 |
| 165.0499 | 276.47 | 17.99 | 18.52 | 18.58 | 18.16 | 0.76 |
| 165.0556 | 282.79 | 17.33 | 17.07 | 16.91 | 17.10 | 0.66 |
| 165.0559 | 21.9   | 16.40 | 16.15 | 16.19 | 15.91 | 0.40 |
| 165.0669 | 176.03 | 17.52 | 16.31 | 16.61 | 16.69 | 1.42 |
| 165.0752 | 22.14  | 18.96 | 17.76 | 18.17 | 18.38 | 1.49 |
| 165.0781 | 265.57 | 19.84 | 17.57 | 17.56 | 17.29 | 2.03 |
| 165.0863 | 208.03 | 14.76 | 9.90  | 9.57  | 10.70 | 1.38 |
| 165.0920 | 191.88 | 16.44 | 15.54 | 15.87 | 16.00 | 0.89 |
| 165.9605 | 31.6   | 15.51 | 15.03 | 14.93 | 15.11 | 0.46 |
| 165.9713 | 26.65  | 14.45 | 14.17 | 14.69 | 14.91 | 0.01 |
| 166.0144 | 290.7  | 16.76 | 17.31 | 17.66 | 17.22 | 0.98 |
| 166.0146 | 112.43 | 16.22 | 15.95 | 15.93 | 15.95 | 0.39 |
| 166.0182 | 17.26  | 20.23 | 21.06 | 20.58 | 20.40 | 1.07 |
| 166.0228 | 16.78  | 14.30 | 13.34 | 11.82 | 13.78 | 0.76 |
| 166.0257 | 294.09 | 16.26 | 16.83 | 17.03 | 16.29 | 0.63 |
| 166.0295 | 20.37  | 16.12 | 15.83 | 15.47 | 15.75 | 0.47 |
| 166.0392 | 21.69  | 13.96 | 14.14 | 14.20 | 15.03 | 0.19 |
| 166.0403 | 218.17 | 15.29 | 14.95 | 14.25 | 14.37 | 0.47 |
| 166.0442 | 20.47  | 15.69 | 16.20 | 16.14 | 16.09 | 0.77 |
| 166.0509 | 180.77 | 18.54 | 18.18 | 18.18 | 18.51 | 0.67 |
| 166.0621 | 288.73 | 18.46 | 17.70 | 17.62 | 17.89 | 1.07 |
| 166.0721 | 20.4   | 16.36 | 13.91 | 13.40 | 15.19 | 1.96 |
| 166.0816 | 188.81 | 16.06 | 15.78 | 15.47 | 15.00 | 0.44 |
| 166.0873 | 136.16 | 15.01 | 14.19 | 14.01 | 14.09 | 1.20 |
| 166.9364 | 168.16 | 9.67  | 18.31 | 17.80 | 10.98 | 1.55 |
| 166.9574 | 145.91 | 14.85 | 13.93 | 13.37 | 14.18 | 0.81 |
| 166.9614 | 31.39  | 15.25 | 14.74 | 14.86 | 14.97 | 0.51 |
| 166.9753 | 21.86  | 19.42 | 23.92 | 23.84 | 23.08 | 1.93 |
| 166.9949 | 48.69  | 18.52 | 18.26 | 18.24 | 18.60 | 0.42 |
| 167.0212 | 17.77  | 24.64 | 24.41 | 24.88 | 24.91 | 0.02 |
| 167.0461 | 290.74 | 16.53 | 16.38 | 16.35 | 16.57 | 0.19 |
| 167.0462 | 181.11 | 17.65 | 15.65 | 15.47 | 16.03 | 1.78 |
| 167.0543 | 119.1  | 14.67 | 14.08 | 13.89 | 14.21 | 0.91 |
| 167.0615 | 196.04 | 16.81 | 16.07 | 15.90 | 16.11 | 0.99 |
| 167.0657 | 253.12 | 21.75 | 22.46 | 21.95 | 22.46 | 0.54 |
| 167.0658 | 27.59  | 24.05 | 23.91 | 23.84 | 23.48 | 0.32 |
| 167.0712 | 289.28 | 17.52 | 17.14 | 17.13 | 17.31 | 0.75 |

|          |        |       |       |       |       |      |
|----------|--------|-------|-------|-------|-------|------|
| 167.1077 | 167.9  | 16.85 | 15.80 | 15.58 | 16.13 | 1.01 |
| 167.1441 | 143.36 | 14.93 | 13.60 | 13.71 | 14.03 | 1.26 |
| 167.9974 | 23.56  | 16.45 | 16.15 | 16.36 | 16.67 | 0.20 |
| 168.0143 | 20.71  | 14.79 | 15.27 | 14.44 | 14.21 | 0.02 |
| 168.0183 | 20.23  | 17.76 | 17.07 | 17.75 | 17.81 | 0.41 |
| 168.0247 | 19.86  | 20.50 | 20.20 | 20.52 | 20.60 | 0.22 |
| 168.0286 | 34.38  | 18.87 | 19.39 | 19.48 | 18.86 | 0.65 |
| 168.0301 | 154.81 | 16.09 | 14.35 | 14.70 | 15.55 | 1.24 |
| 168.0431 | 29.31  | 21.29 | 23.16 | 23.22 | 22.52 | 2.20 |
| 168.0568 | 216.56 | 16.28 | 10.31 | 10.71 | 10.59 | 1.43 |
| 168.0666 | 161.62 | 16.67 | 15.84 | 15.73 | 16.06 | 1.17 |
| 168.1029 | 168.7  | 16.89 | 16.58 | 16.47 | 17.23 | 0.38 |
| 168.9132 | 93.35  | 13.32 | 14.11 | 14.15 | 14.36 | 0.48 |
| 168.9346 | 96.65  | 14.86 | 14.15 | 14.10 | 14.69 | 0.78 |
| 168.9521 | 56.81  | 20.57 | 18.23 | 21.22 | 21.16 | 0.68 |
| 168.9909 | 17.92  | 21.39 | 22.68 | 22.74 | 22.93 | 1.21 |
| 168.9973 | 170.06 | 16.46 | 17.50 | 17.80 | 18.24 | 1.13 |
| 169.0009 | 18.29  | 15.22 | 12.27 | 11.29 | 14.12 | 0.95 |
| 169.0080 | 22.7   | 16.08 | 16.20 | 16.74 | 16.34 | 0.59 |
| 169.0120 | 155.93 | 15.82 | 14.95 | 15.39 | 15.46 | 0.97 |
| 169.0256 | 19.95  | 16.39 | 16.48 | 16.40 | 16.67 | 0.11 |
| 169.0313 | 30.57  | 13.85 | 13.94 | 14.06 | 13.61 | 0.07 |
| 169.0467 | 26.34  | 15.97 | 17.84 | 18.06 | 17.09 | 2.11 |
| 169.0518 | 287.19 | 19.79 | 17.34 | 17.67 | 16.41 | 1.12 |
| 169.0618 | 290.92 | 16.98 | 16.69 | 16.73 | 16.92 | 0.40 |
| 169.0699 | 135.08 | 15.31 | 14.73 | 14.72 | 14.70 | 0.87 |
| 169.0701 | 25.21  | 16.75 | 16.05 | 15.74 | 15.72 | 1.07 |
| 169.0869 | 267.48 | 18.43 | 18.73 | 18.73 | 18.65 | 0.39 |
| 169.1233 | 208.02 | 17.70 | 16.84 | 16.83 | 17.26 | 1.06 |
| 169.9862 | 65.46  | 15.41 | 13.01 | 14.40 | 14.77 | 1.14 |
| 169.9945 | 19.99  | 15.76 | 16.56 | 16.63 | 17.06 | 0.74 |
| 170.0471 | 290.56 | 18.74 | 15.41 | 15.82 | 15.05 | 1.66 |
| 170.0570 | 187.12 | 16.12 | 14.03 | 13.94 | 14.58 | 1.33 |
| 170.0598 | 211.28 | 14.88 | 9.79  | 10.84 | 10.91 | 1.25 |
| 170.0723 | 279.45 | 18.51 | 16.65 | 16.47 | 16.72 | 1.90 |
| 170.0821 | 293.73 | 17.66 | 18.47 | 18.82 | 18.34 | 1.44 |
| 170.0903 | 183.91 | 15.94 | 15.34 | 15.30 | 15.80 | 0.96 |
| 170.8335 | 17.95  | 16.51 | 16.86 | 16.97 | 17.05 | 0.51 |
| 170.8926 | 108.03 | 13.37 | 14.24 | 14.37 | 14.47 | 0.65 |
| 170.9022 | 108.52 | 16.21 | 16.01 | 16.00 | 16.78 | 0.15 |
| 170.9443 | 29.78  | 18.88 | 19.01 | 19.30 | 18.54 | 0.23 |
| 170.9503 | 83.97  | 15.83 | 15.30 | 15.92 | 15.71 | 0.46 |
| 170.9702 | 57.83  | 17.32 | 16.22 | 18.41 | 18.55 | 0.04 |
| 171.0063 | 171.4  | 11.88 | 15.65 | 15.73 | 15.02 | 1.51 |
| 171.0069 | 20.74  | 21.74 | 22.21 | 22.21 | 22.08 | 0.62 |
| 171.0274 | 294.28 | 14.83 | 17.13 | 17.08 | 17.15 | 1.39 |
| 171.0410 | 293.51 | 15.97 | 17.20 | 17.22 | 17.41 | 1.17 |
| 171.0416 | 18.26  | 16.43 | 17.02 | 17.02 | 16.96 | 1.49 |
| 171.0675 | 258.18 | 22.67 | 21.02 | 21.22 | 21.02 | 1.41 |
| 171.0775 | 174.83 | 16.44 | 15.87 | 16.02 | 16.20 | 0.68 |
| 171.1026 | 242.67 | 23.27 | 23.23 | 22.46 | 21.66 | 0.34 |
| 171.1390 | 270.54 | 19.16 | 18.53 | 18.68 | 18.57 | 1.00 |
| 171.1391 | 77.42  | 17.25 | 15.23 | 15.34 | 16.08 | 2.02 |
| 171.8345 | 17.9   | 10.51 | 11.22 | 10.41 | 10.43 | 0.17 |
| 171.9468 | 163.06 | 13.80 | 13.04 | 13.59 | 14.51 | 0.15 |
| 171.9654 | 81.51  | 14.87 | 14.07 | 13.99 | 14.62 | 0.75 |
| 172.0018 | 47.16  | 17.75 | 15.92 | 16.51 | 16.06 | 1.23 |
| 172.0103 | 20.04  | 16.17 | 16.13 | 16.13 | 16.13 | 0.05 |
| 172.0233 | 30.92  | 19.41 | 18.98 | 19.52 | 19.16 | 0.30 |
| 172.0403 | 156.58 | 15.31 | 14.27 | 14.35 | 14.37 | 1.31 |
| 172.0404 | 55.51  | 15.59 | 14.60 | 15.41 | 15.29 | 0.58 |
| 172.0515 | 290.18 | 17.97 | 16.89 | 16.85 | 16.87 | 1.55 |

|          |        |       |       |       |       |      |
|----------|--------|-------|-------|-------|-------|------|
| 172.0517 | 89.95  | 16.64 | 14.35 | 14.83 | 14.90 | 1.93 |
| 172.0628 | 288.8  | 22.92 | 20.92 | 21.04 | 20.95 | 2.18 |
| 172.0709 | 287.87 | 18.68 | 17.06 | 17.12 | 17.26 | 1.87 |
| 172.0880 | 226.22 | 17.00 | 10.41 | 10.45 | 10.55 | 1.85 |
| 172.0978 | 291.06 | 18.09 | 17.68 | 17.56 | 18.17 | 0.53 |
| 172.1059 | 265.83 | 18.94 | 18.20 | 18.23 | 18.54 | 1.33 |
| 172.8995 | 25.54  | 15.75 | 14.45 | 14.47 | 14.61 | 0.56 |
| 172.9414 | 30.31  | 17.22 | 17.09 | 17.40 | 16.69 | 0.07 |
| 172.9494 | 83.79  | 14.59 | 14.30 | 14.51 | 14.59 | 0.08 |
| 172.9579 | 290.38 | 15.32 | 15.29 | 15.93 | 16.63 | 0.25 |
| 172.9858 | 47.88  | 22.80 | 22.37 | 22.83 | 23.43 | 0.14 |
| 172.9898 | 159.37 | 15.66 | 16.57 | 13.99 | 15.62 | 0.07 |
| 172.9913 | 180.55 | 13.66 | 13.63 | 13.37 | 13.67 | 0.08 |
| 173.0084 | 25.89  | 23.84 | 23.82 | 24.02 | 24.21 | 0.26 |
| 173.0255 | 30.27  | 16.07 | 15.91 | 16.24 | 15.92 | 0.04 |
| 173.0343 | 31.5   | 12.61 | 13.58 | 14.22 | 13.27 | 0.51 |
| 173.0467 | 288.47 | 20.65 | 19.06 | 19.45 | 18.35 | 1.08 |
| 173.0567 | 114.35 | 14.40 | 14.43 | 14.49 | 14.97 | 0.16 |
| 173.0580 | 290.34 | 17.49 | 16.19 | 16.36 | 16.10 | 1.11 |
| 173.0662 | 294.11 | 18.22 | 16.55 | 16.92 | 16.75 | 1.64 |
| 173.0831 | 282.05 | 20.39 | 16.74 | 16.29 | 16.09 | 1.72 |
| 173.0934 | 23.23  | 17.22 | 16.97 | 16.76 | 16.87 | 0.56 |
| 173.1014 | 145.53 | 15.66 | 14.39 | 14.12 | 14.68 | 1.23 |
| 173.1045 | 66.18  | 21.16 | 20.77 | 22.90 | 23.12 | 0.50 |
| 173.1093 | 155.48 | 14.91 | 13.91 | 13.92 | 13.44 | 0.88 |
| 173.1182 | 265.73 | 18.13 | 17.64 | 17.63 | 17.98 | 0.64 |
| 173.1295 | 130.94 | 9.52  | 15.12 | 15.27 | 13.37 | 1.65 |
| 173.4732 | 20.54  | 18.03 | 18.63 | 18.24 | 18.17 | 0.68 |
| 173.8315 | 17.73  | 10.55 | 11.14 | 11.34 | 10.96 | 0.34 |
| 173.9575 | 141.23 | 15.22 | 14.58 | 14.93 | 15.13 | 0.62 |
| 173.9804 | 76.64  | 14.99 | 14.09 | 16.08 | 15.16 | 0.00 |
| 173.9884 | 31.4   | 17.60 | 17.06 | 16.88 | 17.22 | 0.66 |
| 174.0019 | 201.66 | 13.52 | 15.71 | 15.72 | 15.90 | 1.09 |
| 174.0128 | 23.25  | 19.39 | 19.33 | 19.64 | 19.83 | 0.27 |
| 174.0173 | 16.77  | 20.34 | 20.54 | 20.37 | 20.10 | 0.14 |
| 174.0235 | 22.09  | 15.13 | 15.48 | 16.19 | 16.36 | 0.47 |
| 174.0308 | 291.65 | 16.65 | 16.38 | 16.30 | 15.78 | 0.37 |
| 174.0421 | 290.11 | 17.99 | 17.65 | 17.28 | 16.85 | 0.43 |
| 174.0560 | 171.87 | 16.22 | 15.16 | 15.12 | 15.34 | 1.36 |
| 174.0592 | 180.75 | 16.14 | 15.62 | 15.70 | 15.85 | 0.71 |
| 174.0672 | 264.62 | 19.14 | 17.14 | 17.20 | 16.99 | 1.81 |
| 174.0673 | 78.71  | 17.42 | 15.16 | 15.50 | 15.87 | 1.94 |
| 174.0782 | 262.58 | 19.53 | 17.25 | 17.67 | 17.29 | 1.68 |
| 174.0863 | 209.24 | 16.41 | 13.34 | 12.09 | 13.76 | 1.15 |
| 174.1015 | 83.84  | 14.36 | 13.79 | 14.14 | 15.27 | 0.19 |
| 174.1078 | 75.97  | 16.16 | 17.00 | 18.10 | 18.48 | 1.09 |
| 174.1217 | 144.38 | 15.41 | 14.67 | 14.59 | 14.70 | 0.97 |
| 174.8893 | 17.64  | 15.28 | 13.49 | 13.35 | 13.08 | 0.91 |
| 174.9078 | 60.91  | 15.85 | 14.85 | 16.81 | 16.57 | 0.02 |
| 174.9558 | 174.52 | 19.21 | 18.79 | 19.44 | 18.21 | 0.22 |
| 174.9839 | 44.86  | 18.43 | 18.15 | 19.01 | 19.19 | 0.22 |
| 174.9913 | 26.66  | 17.42 | 17.05 | 16.65 | 17.16 | 0.50 |
| 175.0250 | 22.45  | 27.87 | 28.81 | 28.54 | 28.29 | 1.38 |
| 175.0400 | 143.02 | 15.30 | 12.23 | 12.84 | 13.43 | 1.40 |
| 175.0515 | 207.71 | 15.73 | 8.39  | 8.15  | 10.87 | 1.81 |
| 175.0623 | 257.89 | 21.42 | 19.05 | 19.21 | 19.47 | 1.78 |
| 175.0625 | 25.23  | 18.11 | 16.64 | 15.95 | 16.18 | 1.70 |
| 175.0711 | 207.77 | 15.85 | 11.46 | 12.39 | 12.29 | 1.40 |
| 175.0816 | 196.99 | 14.23 | 8.93  | 9.09  | 8.84  | 1.92 |
| 175.0985 | 220.73 | 18.04 | 13.96 | 12.94 | 14.23 | 1.49 |
| 175.1667 | 20.17  | 15.40 | 15.84 | 15.40 | 15.08 | 0.15 |
| 175.9886 | 22.86  | 15.07 | 15.72 | 15.57 | 15.89 | 0.75 |

|          |        |       |       |       |       |      |
|----------|--------|-------|-------|-------|-------|------|
| 175.9960 | 65     | 15.26 | 13.89 | 15.39 | 14.88 | 0.47 |
| 176.0009 | 27.42  | 17.31 | 17.80 | 18.20 | 18.27 | 0.64 |
| 176.0098 | 27.45  | 16.86 | 15.95 | 16.28 | 16.50 | 0.82 |
| 176.0282 | 20.13  | 24.05 | 24.72 | 24.60 | 24.26 | 1.20 |
| 176.0352 | 138.85 | 15.69 | 14.15 | 14.14 | 15.21 | 1.39 |
| 176.0464 | 290.54 | 18.06 | 17.47 | 17.60 | 17.10 | 0.92 |
| 176.0576 | 293.5  | 17.41 | 15.45 | 15.26 | 15.38 | 1.26 |
| 176.0660 | 96.69  | 15.81 | 13.84 | 14.17 | 14.66 | 1.62 |
| 176.0717 | 170.89 | 15.38 | 14.16 | 14.06 | 14.50 | 0.75 |
| 176.0829 | 282.67 | 17.32 | 15.60 | 16.17 | 15.90 | 1.23 |
| 176.0942 | 288.53 | 16.91 | 11.50 | 12.04 | 11.37 | 1.54 |
| 176.9051 | 71.78  | 15.20 | 14.37 | 14.60 | 14.52 | 0.69 |
| 176.9103 | 30.28  | 14.94 | 14.58 | 14.75 | 14.78 | 0.27 |
| 176.9360 | 19.57  | 20.74 | 23.13 | 23.13 | 22.79 | 1.64 |
| 176.9781 | 157.33 | 15.70 | 15.01 | 15.35 | 16.55 | 0.37 |
| 176.9837 | 176.72 | 16.60 | 15.88 | 15.85 | 16.26 | 1.27 |
| 177.0058 | 21.25  | 16.49 | 17.74 | 17.05 | 16.83 | 0.43 |
| 177.0193 | 130.99 | 14.93 | 14.20 | 14.10 | 14.45 | 1.07 |
| 177.0298 | 19.92  | 21.30 | 22.05 | 21.92 | 21.59 | 1.34 |
| 177.0403 | 266.58 | 18.85 | 19.72 | 19.66 | 19.35 | 1.17 |
| 177.0556 | 185.58 | 16.49 | 16.10 | 16.05 | 16.18 | 0.64 |
| 177.0782 | 256.12 | 20.98 | 18.40 | 18.62 | 18.90 | 2.11 |
| 177.0872 | 156.58 | 15.24 | 14.73 | 14.71 | 14.63 | 0.80 |
| 177.0920 | 201.91 | 16.92 | 16.15 | 16.63 | 16.52 | 0.76 |
| 177.1649 | 216.97 | 15.77 | 14.16 | 15.18 | 15.43 | 0.66 |
| 178.0069 | 21.76  | 15.58 | 14.54 | 14.88 | 15.28 | 0.60 |
| 178.0180 | 20.91  | 17.02 | 16.93 | 16.83 | 17.55 | 0.06 |
| 178.0257 | 292.02 | 15.02 | 16.50 | 16.49 | 15.45 | 0.96 |
| 178.0327 | 17.08  | 16.48 | 17.03 | 16.85 | 16.53 | 0.91 |
| 178.0438 | 165.37 | 15.22 | 14.16 | 14.08 | 14.48 | 1.14 |
| 178.0510 | 171.65 | 18.58 | 18.60 | 18.41 | 18.38 | 0.16 |
| 178.0511 | 23.23  | 18.55 | 23.27 | 17.97 | 17.86 | 0.89 |
| 178.0621 | 285.32 | 18.81 | 17.69 | 17.88 | 17.65 | 1.71 |
| 178.0624 | 35.46  | 17.48 | 15.85 | 15.18 | 15.64 | 1.50 |
| 178.0734 | 289.46 | 15.87 | 11.54 | 10.63 | 11.31 | 1.81 |
| 178.0874 | 144.16 | 14.93 | 14.29 | 14.34 | 14.58 | 0.91 |
| 178.0987 | 210.55 | 16.08 | 9.24  | 8.63  | 9.43  | 1.90 |
| 178.9340 | 154.62 | 10.10 | 18.01 | 17.87 | 15.68 | 1.99 |
| 178.9421 | 91.97  | 19.83 | 19.72 | 20.32 | 20.45 | 0.33 |
| 178.9727 | 129.52 | 15.35 | 13.83 | 14.04 | 14.76 | 1.36 |
| 178.9938 | 162.67 | 17.94 | 18.98 | 18.94 | 19.35 | 1.23 |
| 179.0075 | 38.82  | 17.60 | 16.88 | 17.24 | 17.34 | 0.63 |
| 179.0217 | 21.51  | 14.74 | 14.00 | 12.85 | 14.49 | 0.32 |
| 179.0350 | 141.32 | 16.53 | 16.23 | 16.21 | 16.22 | 0.56 |
| 179.0463 | 201.48 | 16.28 | 14.50 | 13.92 | 14.72 | 1.21 |
| 179.0564 | 23.42  | 23.50 | 23.95 | 23.66 | 23.58 | 0.45 |
| 179.0657 | 211.59 | 14.81 | 9.81  | 9.32  | 9.69  | 1.28 |
| 179.0713 | 289.78 | 16.67 | 16.21 | 16.46 | 16.50 | 0.47 |
| 179.0714 | 179.44 | 17.25 | 16.83 | 16.99 | 17.24 | 0.65 |
| 179.0939 | 233.15 | 17.92 | 14.67 | 14.80 | 14.64 | 0.89 |
| 179.1078 | 176.94 | 16.42 | 15.12 | 15.18 | 15.43 | 1.17 |
| 179.1078 | 112.25 | 17.06 | 15.12 | 15.91 | 16.47 | 1.29 |
| 179.9416 | 91.16  | 14.13 | 13.47 | 13.89 | 14.40 | 0.34 |
| 179.9444 | 127.87 | 15.34 | 14.60 | 14.48 | 15.46 | 0.73 |
| 180.0302 | 166.47 | 16.27 | 15.01 | 15.21 | 15.77 | 1.42 |
| 180.0414 | 290.89 | 17.23 | 16.97 | 16.72 | 16.74 | 0.62 |
| 180.0415 | 106.99 | 17.04 | 15.03 | 15.65 | 16.05 | 1.81 |
| 180.0527 | 56.1   | 13.80 | 15.66 | 16.49 | 14.81 | 0.92 |
| 180.0597 | 27.79  | 19.16 | 19.57 | 19.27 | 19.19 | 0.33 |
| 180.0668 | 27.79  | 21.68 | 21.10 | 21.37 | 21.43 | 0.91 |
| 180.0778 | 284.98 | 17.56 | 16.28 | 16.42 | 16.42 | 1.25 |
| 180.0779 | 83.44  | 17.12 | 14.93 | 15.10 | 15.89 | 1.76 |

|          |        |       |       |       |       |      |
|----------|--------|-------|-------|-------|-------|------|
| 180.0876 | 276.82 | 18.11 | 16.52 | 16.54 | 17.11 | 1.71 |
| 180.1030 | 143.14 | 15.62 | 14.42 | 14.53 | 14.72 | 1.37 |
| 180.9219 | 30.51  | 14.91 | 13.95 | 13.74 | 14.37 | 1.25 |
| 180.9262 | 160.05 | 18.26 | 16.53 | 16.01 | 17.27 | 1.80 |
| 180.9311 | 32.83  | 19.91 | 20.03 | 19.91 | 19.81 | 0.04 |
| 180.9404 | 122.5  | 16.80 | 16.33 | 16.28 | 16.94 | 0.51 |
| 180.9521 | 150.35 | 15.60 | 16.19 | 16.00 | 15.91 | 0.73 |
| 180.9732 | 44.79  | 24.15 | 25.24 | 25.32 | 25.16 | 1.85 |
| 180.9894 | 146.18 | 14.96 | 14.23 | 14.15 | 14.48 | 1.06 |
| 181.0095 | 173.15 | 16.03 | 14.58 | 14.06 | 14.60 | 1.24 |
| 181.0142 | 139    | 15.59 | 15.07 | 15.25 | 15.20 | 0.74 |
| 181.0256 | 136.12 | 14.77 | 14.19 | 14.07 | 14.37 | 0.74 |
| 181.0290 | 18.91  | 17.47 | 17.95 | 17.91 | 17.54 | 0.93 |
| 181.0386 | 23.76  | 16.93 | 16.84 | 16.73 | 17.24 | 0.10 |
| 181.0509 | 19.84  | 16.47 | 16.48 | 16.68 | 16.97 | 0.25 |
| 181.0519 | 290.77 | 18.84 | 16.88 | 16.75 | 16.72 | 1.80 |
| 181.0634 | 22.85  | 22.25 | 22.01 | 21.92 | 21.65 | 0.41 |
| 181.0724 | 177.26 | 17.71 | 15.99 | 15.86 | 15.84 | 1.51 |
| 181.0813 | 204.6  | 14.25 | 8.39  | 7.82  | 8.61  | 1.91 |
| 181.0869 | 290.44 | 17.87 | 17.29 | 17.42 | 17.51 | 0.92 |
| 181.1234 | 179.46 | 16.12 | 15.22 | 15.35 | 15.77 | 1.09 |
| 181.1347 | 34.75  | 13.48 | 14.08 | 11.50 | 12.19 | 0.58 |
| 181.1597 | 189.77 | 15.58 | 14.63 | 14.63 | 14.67 | 1.51 |
| 181.9662 | 24.8   | 23.56 | 23.09 | 23.05 | 23.25 | 0.74 |
| 181.9764 | 38.88  | 18.91 | 20.02 | 20.09 | 19.96 | 1.85 |
| 182.0095 | 145.89 | 15.64 | 14.68 | 14.61 | 14.52 | 1.12 |
| 182.0095 | 290.35 | 16.36 | 15.87 | 16.01 | 15.41 | 0.37 |
| 182.0132 | 20.32  | 15.69 | 16.09 | 15.69 | 15.81 | 0.23 |
| 182.0225 | 172.83 | 15.66 | 15.13 | 15.02 | 15.83 | 0.46 |
| 182.0470 | 208.16 | 17.69 | 16.32 | 15.84 | 16.72 | 1.04 |
| 182.0471 | 290.87 | 19.56 | 17.47 | 17.45 | 16.97 | 1.86 |
| 182.0572 | 189.29 | 17.25 | 16.38 | 18.47 | 18.49 | 0.06 |
| 182.0672 | 24.96  | 18.39 | 18.03 | 17.98 | 17.66 | 0.51 |
| 182.0725 | 212.22 | 15.82 | 9.61  | 9.02  | 9.93  | 1.85 |
| 182.0823 | 152.84 | 15.61 | 14.68 | 14.67 | 15.01 | 1.15 |
| 182.0904 | 117.28 | 14.91 | 13.65 | 14.12 | 14.33 | 1.22 |
| 182.1187 | 115.73 | 15.40 | 23.20 | 16.81 | 14.32 | 1.25 |
| 182.9196 | 94.1   | 14.09 | 14.01 | 13.79 | 14.62 | 0.09 |
| 182.9233 | 153.3  | 15.64 | 14.11 | 14.14 | 14.87 | 1.18 |
| 182.9306 | 103.94 | 15.88 | 16.12 | 16.14 | 16.07 | 0.27 |
| 182.9691 | 38.32  | 18.39 | 17.42 | 17.25 | 17.77 | 0.99 |
| 182.9774 | 44.94  | 17.06 | 18.24 | 18.32 | 18.19 | 1.86 |
| 182.9887 | 158.84 | 15.87 | 14.83 | 14.60 | 14.91 | 1.35 |
| 182.9908 | 26.88  | 15.50 | 15.02 | 14.83 | 15.27 | 0.71 |
| 183.0065 | 159.1  | 15.03 | 14.64 | 14.63 | 14.73 | 0.56 |
| 183.0165 | 25.56  | 16.16 | 13.30 | 13.53 | 15.66 | 1.16 |
| 183.0276 | 43.64  | 15.77 | 15.84 | 16.27 | 16.24 | 0.50 |
| 183.0300 | 161.25 | 15.27 | 14.16 | 13.67 | 14.00 | 1.26 |
| 183.0358 | 24.32  | 15.08 | 14.56 | 14.18 | 15.01 | 0.44 |
| 183.0411 | 116.39 | 15.10 | 14.26 | 14.07 | 15.04 | 0.98 |
| 183.0525 | 204.94 | 14.21 | 11.98 | 9.51  | 10.99 | 0.76 |
| 183.0606 | 160.16 | 16.60 | 15.89 | 15.85 | 16.00 | 1.10 |
| 183.0676 | 285.27 | 20.42 | 18.60 | 18.85 | 18.95 | 1.70 |
| 183.0697 | 29.76  | 14.61 | 15.54 | 15.25 | 15.20 | 0.78 |
| 183.0775 | 289.79 | 15.55 | 16.22 | 16.49 | 16.42 | 0.73 |
| 183.0775 | 161.87 | 15.54 | 14.52 | 14.36 | 14.74 | 1.19 |
| 183.0822 | 277.94 | 17.18 | 17.30 | 17.27 | 16.49 | 0.01 |
| 183.1026 | 261.3  | 20.77 | 18.46 | 18.60 | 18.72 | 1.74 |
| 183.1221 | 56.93  | 8.64  | 19.73 | 10.37 | 7.50  | 1.21 |
| 183.1390 | 210.8  | 18.07 | 17.12 | 16.96 | 17.35 | 1.28 |
| 183.9633 | 24.93  | 21.82 | 21.28 | 21.25 | 21.47 | 0.83 |
| 184.0019 | 52.66  | 16.55 | 15.91 | 15.57 | 15.33 | 0.59 |

|          |        |       |       |       |       |      |
|----------|--------|-------|-------|-------|-------|------|
| 184.0199 | 16.91  | 13.82 | 11.65 | 11.24 | 12.54 | 0.80 |
| 184.0382 | 289.11 | 18.91 | 18.42 | 17.74 | 19.14 | 0.85 |
| 184.0382 | 162.75 | 19.96 | 18.70 | 18.40 | 19.51 | 0.92 |
| 184.0385 | 20.02  | 19.62 | 19.18 | 18.97 | 19.63 | 1.13 |
| 184.0518 | 216.76 | 15.24 | 8.05  | 8.81  | 8.81  | 1.76 |
| 184.0597 | 29.56  | 19.05 | 18.27 | 18.66 | 18.19 | 0.77 |
| 184.0628 | 291.62 | 21.36 | 19.26 | 19.50 | 19.32 | 1.96 |
| 184.0731 | 30     | 22.13 | 22.22 | 22.18 | 21.76 | 0.02 |
| 184.0882 | 211.77 | 15.23 | 9.76  | 9.93  | 10.09 | 1.92 |
| 184.0979 | 176.73 | 16.37 | 15.97 | 16.17 | 16.22 | 0.45 |
| 184.1060 | 187.6  | 16.88 | 15.49 | 15.52 | 16.02 | 1.47 |
| 184.9086 | 90.35  | 15.09 | 15.35 | 15.45 | 15.42 | 0.62 |
| 184.9261 | 53.04  | 19.83 | 17.62 | 20.70 | 20.49 | 0.51 |
| 184.9500 | 174.86 | 14.65 | 14.13 | 13.92 | 14.22 | 0.55 |
| 184.9601 | 30.58  | 15.13 | 14.15 | 14.45 | 13.97 | 0.68 |
| 184.9667 | 29.11  | 15.80 | 15.68 | 15.42 | 15.85 | 0.14 |
| 184.9859 | 26.11  | 19.78 | 22.51 | 22.18 | 22.14 | 1.52 |
| 185.0039 | 24.29  | 15.06 | 16.14 | 16.25 | 16.06 | 0.88 |
| 185.0069 | 39.09  | 15.23 | 14.83 | 15.02 | 14.96 | 0.21 |
| 185.0124 | 74.86  | 13.57 | 13.74 | 13.89 | 14.46 | 0.11 |
| 185.0203 | 294.33 | 14.74 | 16.31 | 16.96 | 16.96 | 1.28 |
| 185.0225 | 22.59  | 17.19 | 17.21 | 16.52 | 17.05 | 0.31 |
| 185.0468 | 290.12 | 18.32 | 17.09 | 16.90 | 16.64 | 1.41 |
| 185.0568 | 145.56 | 15.68 | 14.66 | 14.53 | 15.32 | 1.23 |
| 185.0570 | 20.1   | 17.34 | 17.66 | 17.93 | 18.43 | 0.49 |
| 185.0579 | 290.42 | 17.45 | 16.40 | 16.47 | 16.79 | 0.72 |
| 185.0662 | 289.34 | 16.76 | 14.82 | 14.73 | 15.22 | 1.01 |
| 185.0707 | 290.03 | 17.23 | 16.49 | 15.95 | 16.21 | 0.68 |
| 185.0764 | 27.77  | 25.91 | 26.10 | 26.15 | 25.72 | 0.22 |
| 185.0830 | 289.66 | 19.97 | 17.37 | 16.27 | 17.26 | 1.31 |
| 185.0932 | 189.33 | 15.87 | 15.70 | 15.64 | 16.17 | 0.23 |
| 185.1118 | 198.55 | 16.45 | 15.78 | 15.94 | 15.79 | 0.63 |
| 185.1183 | 263.42 | 19.35 | 19.01 | 19.16 | 19.03 | 0.38 |
| 185.1185 | 24.23  | 17.70 | 17.03 | 16.53 | 17.04 | 1.22 |
| 185.1546 | 262.5  | 18.20 | 17.47 | 17.42 | 17.66 | 1.29 |
| 185.9591 | 26.22  | 16.44 | 15.58 | 15.49 | 15.78 | 1.18 |
| 185.9942 | 24.34  | 15.13 | 12.42 | 11.99 | 14.71 | 1.20 |
| 186.0357 | 20.52  | 17.77 | 17.36 | 17.23 | 17.60 | 0.97 |
| 186.0397 | 29.51  | 19.68 | 19.40 | 19.84 | 19.56 | 0.14 |
| 186.0421 | 291.7  | 17.86 | 16.50 | 16.35 | 16.12 | 1.44 |
| 186.0673 | 286.22 | 16.81 | 16.04 | 16.13 | 16.23 | 0.65 |
| 186.0718 | 61.73  | 15.70 | 13.35 | 14.37 | 14.80 | 1.22 |
| 186.0786 | 253.58 | 22.07 | 21.30 | 21.52 | 21.45 | 0.86 |
| 186.0826 | 29.85  | 15.29 | 14.87 | 14.77 | 14.23 | 0.56 |
| 186.0861 | 208.01 | 16.38 | 15.72 | 15.21 | 15.90 | 0.54 |
| 186.1001 | 36.63  | 15.26 | 15.26 | 15.31 | 14.85 | 0.03 |
| 186.1136 | 175.12 | 18.73 | 18.06 | 18.23 | 18.36 | 1.04 |
| 186.1216 | 201.94 | 17.40 | 16.60 | 16.46 | 17.25 | 0.97 |
| 186.5028 | 276.36 | 19.21 | 18.86 | 19.16 | 18.54 | 0.26 |
| 186.9183 | 38.3   | 17.94 | 16.79 | 17.38 | 16.86 | 0.70 |
| 186.9244 | 67.16  | 16.23 | 16.21 | 17.12 | 16.84 | 0.80 |
| 186.9296 | 40.61  | 18.10 | 18.43 | 18.74 | 18.32 | 0.65 |
| 186.9391 | 42.08  | 18.57 | 19.32 | 19.47 | 19.34 | 1.51 |
| 186.9659 | 27.75  | 14.66 | 13.80 | 12.40 | 13.27 | 0.79 |
| 187.0018 | 22.54  | 19.19 | 20.19 | 20.23 | 19.94 | 1.35 |
| 187.0073 | 22.54  | 16.16 | 17.87 | 15.66 | 17.46 | 0.38 |
| 187.0096 | 189.17 | 15.08 | 14.29 | 15.08 | 13.92 | 0.35 |
| 187.0245 | 157.06 | 13.44 | 14.75 | 15.01 | 14.83 | 0.88 |
| 187.0383 | 18.25  | 16.41 | 16.64 | 16.71 | 16.49 | 0.44 |
| 187.0409 | 290.81 | 14.01 | 18.55 | 17.40 | 15.11 | 1.85 |
| 187.0623 | 285.82 | 20.01 | 18.39 | 18.68 | 18.31 | 1.54 |
| 187.0728 | 18.57  | 16.47 | 16.48 | 16.50 | 16.86 | 0.10 |

|          |        |       |       |       |       |      |
|----------|--------|-------|-------|-------|-------|------|
| 187.0735 | 294.47 | 19.88 | 17.40 | 17.72 | 17.62 | 2.03 |
| 187.0807 | 29.32  | 19.28 | 19.27 | 19.24 | 18.75 | 0.11 |
| 187.0817 | 290.97 | 18.80 | 17.11 | 16.93 | 17.24 | 1.89 |
| 187.1088 | 139.04 | 15.67 | 14.09 | 14.32 | 14.51 | 1.63 |
| 187.1090 | 19.5   | 16.72 | 16.33 | 16.32 | 16.38 | 0.73 |
| 187.1170 | 121.66 | 14.84 | 13.88 | 14.08 | 14.37 | 0.86 |
| 187.1340 | 238.15 | 18.71 | 17.37 | 17.18 | 17.65 | 1.31 |
| 187.9968 | 37.72  | 16.78 | 15.65 | 15.79 | 15.54 | 0.84 |
| 188.0015 | 27.04  | 16.36 | 14.93 | 14.72 | 15.55 | 0.79 |
| 188.0214 | 21.84  | 17.55 | 17.24 | 17.28 | 17.61 | 0.40 |
| 188.0354 | 27.56  | 14.35 | 12.49 | 13.59 | 14.23 | 0.52 |
| 188.0462 | 31.36  | 17.33 | 15.04 | 15.28 | 15.15 | 1.64 |
| 188.0577 | 288.2  | 20.24 | 18.88 | 19.17 | 18.37 | 1.59 |
| 188.0831 | 61.61  | 15.30 | 13.93 | 14.09 | 14.91 | 0.64 |
| 188.0932 | 20.63  | 16.71 | 16.38 | 16.49 | 16.77 | 0.39 |
| 188.0941 | 290.9  | 20.08 | 17.95 | 18.39 | 18.37 | 1.69 |
| 188.1009 | 176.68 | 18.81 | 18.03 | 18.48 | 18.44 | 0.70 |
| 188.1374 | 143.21 | 15.21 | 14.24 | 14.21 | 14.15 | 1.03 |
| 188.9155 | 32.63  | 16.51 | 15.01 | 15.30 | 15.64 | 1.06 |
| 188.9394 | 92.2   | 18.32 | 10.32 | 11.14 | 10.93 | 1.76 |
| 188.9808 | 61.81  | 18.20 | 18.95 | 19.82 | 19.50 | 1.54 |
| 188.9867 | 18.94  | 19.25 | 19.91 | 19.43 | 19.38 | 0.29 |
| 188.9999 | 41.11  | 16.49 | 14.60 | 14.35 | 15.71 | 1.34 |
| 189.0041 | 17.13  | 20.96 | 21.00 | 20.62 | 21.27 | 0.14 |
| 189.0171 | 43.38  | 16.62 | 20.04 | 15.88 | 15.94 | 0.70 |
| 189.0346 | 20.86  | 15.25 | 15.56 | 14.98 | 15.79 | 0.08 |
| 189.0408 | 17.15  | 19.67 | 19.95 | 19.88 | 20.03 | 0.60 |
| 189.0414 | 182.42 | 17.61 | 17.33 | 17.28 | 17.06 | 0.44 |
| 189.0418 | 289.76 | 17.75 | 16.94 | 17.61 | 17.00 | 0.46 |
| 189.0521 | 19.34  | 15.36 | 16.64 | 16.56 | 16.58 | 1.57 |
| 189.0670 | 53.29  | 18.21 | 19.47 | 20.61 | 19.96 | 1.26 |
| 189.0671 | 186.2  | 15.67 | 15.30 | 14.89 | 15.88 | 0.45 |
| 189.0780 | 249.47 | 20.68 | 18.25 | 18.37 | 18.71 | 2.01 |
| 189.0885 | 22.61  | 16.34 | 16.05 | 15.99 | 15.95 | 0.42 |
| 189.0894 | 289.08 | 16.67 | 13.64 | 13.94 | 14.15 | 1.23 |
| 189.0965 | 193.85 | 14.96 | 15.33 | 15.21 | 14.91 | 0.29 |
| 189.1133 | 124.56 | 16.78 | 16.30 | 16.61 | 16.34 | 0.52 |
| 189.1246 | 70.42  | 15.09 | 14.83 | 15.22 | 14.99 | 0.07 |
| 189.1288 | 25.53  | 16.42 | 14.29 | 15.48 | 16.99 | 0.62 |
| 189.9759 | 81.38  | 14.22 | 13.90 | 13.37 | 13.76 | 0.28 |
| 189.9894 | 23.88  | 17.97 | 17.21 | 17.01 | 17.64 | 0.96 |
| 190.0078 | 20.88  | 16.38 | 16.30 | 16.06 | 16.53 | 0.22 |
| 190.0183 | 26.28  | 17.16 | 16.40 | 16.66 | 16.99 | 0.69 |
| 190.0367 | 17.14  | 16.75 | 18.63 | 18.59 | 18.18 | 1.75 |
| 190.0439 | 22.97  | 16.03 | 16.68 | 16.52 | 16.54 | 0.60 |
| 190.0510 | 160.5  | 15.84 | 14.79 | 14.71 | 14.89 | 1.25 |
| 190.0546 | 20.93  | 19.28 | 18.48 | 18.82 | 19.01 | 0.92 |
| 190.0621 | 289.85 | 17.55 | 16.78 | 16.88 | 16.71 | 1.08 |
| 190.0732 | 287.18 | 19.43 | 17.01 | 16.87 | 16.64 | 1.51 |
| 190.0988 | 210.51 | 15.59 | 10.14 | 10.75 | 10.43 | 1.69 |
| 190.1100 | 211.81 | 15.18 | 9.22  | 9.09  | 9.48  | 1.66 |
| 190.9551 | 40.67  | 18.29 | 18.27 | 17.53 | 18.09 | 0.23 |
| 190.9729 | 26.17  | 16.60 | 15.75 | 16.09 | 15.71 | 1.10 |
| 190.9790 | 81.67  | 13.73 | 12.71 | 13.89 | 13.40 | 0.36 |
| 191.0199 | 21.68  | 25.52 | 27.31 | 27.74 | 27.49 | 1.90 |
| 191.0351 | 139.62 | 14.81 | 14.24 | 14.03 | 14.28 | 0.81 |
| 191.0359 | 30.22  | 15.49 | 15.34 | 15.53 | 14.90 | 0.14 |
| 191.0563 | 19.38  | 16.58 | 16.19 | 16.26 | 16.18 | 0.30 |
| 191.0572 | 284.38 | 18.69 | 17.71 | 17.83 | 17.55 | 1.33 |
| 191.0673 | 19.72  | 14.80 | 14.89 | 14.67 | 14.29 | 0.03 |
| 191.0714 | 154.04 | 15.82 | 14.37 | 14.55 | 15.00 | 1.37 |
| 191.0754 | 148.02 | 15.96 | 14.69 | 14.60 | 15.41 | 1.24 |



|          |        |       |       |       |       |      |
|----------|--------|-------|-------|-------|-------|------|
| 191.0938 | 281.65 | 18.23 | 16.51 | 16.91 | 17.09 | 1.63 |
| 191.0940 | 90.13  | 16.48 | 14.46 | 14.95 | 15.37 | 1.73 |
| 191.1077 | 259.41 | 17.75 | 17.50 | 17.60 | 17.68 | 0.31 |
| 191.1806 | 231.54 | 19.85 | 18.60 | 19.44 | 19.79 | 1.15 |
| 191.9863 | 19.87  | 15.83 | 13.23 | 13.07 | 14.75 | 1.07 |
| 191.9950 | 26.46  | 23.67 | 23.77 | 23.84 | 23.38 | 0.15 |
| 192.0183 | 58.04  | 15.77 | 13.15 | 13.82 | 15.83 | 1.23 |
| 192.0233 | 20.29  | 21.38 | 23.16 | 23.85 | 23.42 | 1.86 |
| 192.0304 | 135.14 | 14.83 | 13.35 | 12.77 | 14.35 | 1.20 |
| 192.0305 | 17.68  | 13.44 | 9.86  | 9.95  | 11.37 | 1.43 |
| 192.0338 | 18.45  | 16.60 | 16.63 | 16.13 | 17.32 | 0.07 |
| 192.0415 | 291.49 | 16.18 | 16.26 | 16.38 | 15.84 | 0.07 |
| 192.0516 | 170.67 | 17.32 | 17.02 | 16.97 | 17.47 | 0.34 |
| 192.0666 | 285.87 | 16.74 | 16.88 | 16.73 | 16.92 | 0.12 |
| 192.0666 | 168.63 | 18.46 | 17.20 | 17.60 | 17.72 | 1.55 |
| 192.0779 | 286.08 | 17.49 | 16.82 | 16.91 | 16.91 | 0.83 |
| 192.0880 | 169.93 | 17.56 | 16.55 | 16.71 | 16.77 | 1.24 |
| 192.0974 | 209.15 | 14.92 | 8.84  | 9.27  | 8.77  | 1.52 |
| 192.1030 | 184.91 | 16.08 | 15.44 | 15.37 | 15.67 | 0.80 |
| 192.1111 | 183.35 | 16.19 | 15.97 | 16.00 | 16.10 | 0.60 |
| 192.1839 | 227.18 | 16.48 | 15.16 | 15.88 | 16.33 | 1.15 |
| 192.9523 | 83.89  | 15.71 | 16.01 | 16.82 | 16.86 | 0.97 |
| 192.9579 | 93.87  | 15.43 | 14.57 | 14.95 | 15.50 | 0.86 |
| 192.9921 | 29.93  | 18.07 | 16.47 | 16.58 | 17.03 | 1.46 |
| 192.9994 | 25.7   | 19.43 | 19.26 | 19.11 | 18.87 | 0.48 |
| 193.0095 | 170.03 | 15.20 | 14.40 | 14.47 | 14.46 | 1.01 |
| 193.0139 | 21.63  | 16.37 | 16.00 | 16.12 | 16.22 | 0.44 |
| 193.0242 | 20.2   | 18.82 | 20.58 | 21.33 | 20.90 | 1.82 |
| 193.0355 | 163.15 | 19.64 | 20.36 | 20.25 | 20.19 | 0.64 |
| 193.0506 | 154.29 | 16.06 | 14.50 | 14.76 | 15.08 | 1.32 |
| 193.0620 | 184.33 | 15.96 | 15.37 | 15.32 | 15.39 | 0.95 |
| 193.0731 | 293.14 | 17.86 | 17.08 | 17.28 | 17.02 | 1.09 |
| 193.0823 | 126.41 | 16.29 | 15.78 | 15.99 | 16.05 | 0.70 |
| 193.0871 | 187.17 | 17.50 | 17.15 | 17.22 | 17.33 | 0.52 |
| 193.1096 | 210.37 | 16.31 | 12.35 | 12.56 | 13.03 | 1.97 |
| 193.1234 | 293.27 | 17.23 | 16.84 | 16.93 | 16.83 | 0.64 |
| 193.9908 | 31.69  | 18.71 | 18.81 | 18.89 | 18.39 | 0.14 |
| 193.9993 | 32.74  | 16.07 | 15.96 | 16.06 | 15.57 | 0.22 |
| 194.0130 | 290.52 | 14.98 | 7.99  | 8.19  | 8.42  | 1.96 |
| 194.0130 | 17.17  | 10.80 | 15.46 | 13.54 | 15.17 | 0.95 |
| 194.0274 | 18.88  | 14.31 | 15.89 | 16.38 | 16.10 | 1.57 |
| 194.0340 | 74.21  | 15.74 | 17.10 | 17.78 | 18.09 | 1.42 |
| 194.0388 | 126.63 | 14.98 | 14.40 | 14.14 | 14.41 | 0.88 |
| 194.0460 | 138.5  | 15.99 | 14.50 | 13.95 | 15.33 | 1.50 |
| 194.0572 | 290.7  | 16.55 | 16.34 | 16.20 | 16.12 | 0.31 |
| 194.0574 | 83     | 17.21 | 14.85 | 14.83 | 15.21 | 1.81 |
| 194.0823 | 148.69 | 16.50 | 16.59 | 16.22 | 16.62 | 0.06 |
| 194.1036 | 48.79  | 23.21 | 22.83 | 23.70 | 23.85 | 0.13 |
| 194.9059 | 146.93 | 20.74 | 18.68 | 18.69 | 19.31 | 1.52 |
| 194.9372 | 17.43  | 19.86 | 22.61 | 22.39 | 21.99 | 1.76 |
| 194.9468 | 19.82  | 21.44 | 23.98 | 23.94 | 23.62 | 1.67 |
| 194.9678 | 173.37 | 12.52 | 15.71 | 12.92 | 13.56 | 0.45 |
| 194.9817 | 39.83  | 15.01 | 12.75 | 15.29 | 14.88 | 0.47 |
| 194.9888 | 46.15  | 21.26 | 21.34 | 21.44 | 21.45 | 0.23 |
| 195.0299 | 141.46 | 14.82 | 14.10 | 13.90 | 14.10 | 0.87 |
| 195.0337 | 21.42  | 14.55 | 16.15 | 12.77 | 13.49 | 0.02 |
| 195.0412 | 142.2  | 14.68 | 14.12 | 13.89 | 14.24 | 0.91 |
| 195.0514 | 20.76  | 21.19 | 21.55 | 21.45 | 21.83 | 0.69 |
| 195.0606 | 176.93 | 15.53 | 15.57 | 15.59 | 15.40 | 0.05 |
| 195.0675 | 288.71 | 18.40 | 16.61 | 16.54 | 16.84 | 1.83 |
| 195.0776 | 177.57 | 15.23 | 15.06 | 14.70 | 15.08 | 0.50 |
| 195.0868 | 80.72  | 14.00 | 14.60 | 15.38 | 16.16 | 0.74 |

|          |        |       |       |       |       |      |
|----------|--------|-------|-------|-------|-------|------|
| 195.1027 | 285.32 | 17.58 | 17.25 | 17.32 | 17.41 | 0.65 |
| 195.1069 | 49.25  | 19.08 | 18.13 | 19.52 | 19.69 | 0.26 |
| 195.1390 | 294.82 | 17.47 | 17.23 | 17.19 | 17.28 | 0.42 |
| 195.9059 | 133.27 | 17.72 | 14.82 | 14.77 | 15.54 | 1.89 |
| 195.9922 | 35.06  | 16.15 | 16.26 | 16.58 | 16.67 | 0.31 |
| 196.0021 | 19.2   | 14.04 | 15.64 | 14.06 | 15.78 | 0.44 |
| 196.0231 | 32.32  | 16.54 | 15.37 | 15.91 | 15.62 | 0.81 |
| 196.0250 | 290.98 | 11.42 | 11.40 | 14.07 | 17.40 | 0.54 |
| 196.0289 | 20.55  | 16.47 | 16.54 | 16.40 | 16.51 | 0.03 |
| 196.0374 | 186.35 | 14.80 | 10.74 | 9.94  | 12.52 | 1.40 |
| 196.0403 | 36.05  | 16.47 | 16.36 | 16.43 | 16.14 | 0.17 |
| 196.0464 | 137    | 16.07 | 15.72 | 14.93 | 16.32 | 0.81 |
| 196.0549 | 20.5   | 16.49 | 16.65 | 16.60 | 16.99 | 0.33 |
| 196.0628 | 293.39 | 20.63 | 18.18 | 18.55 | 18.29 | 2.00 |
| 196.0728 | 288.62 | 18.24 | 17.43 | 16.40 | 14.02 | 0.58 |
| 196.0745 | 19.92  | 20.26 | 19.94 | 20.36 | 20.48 | 0.19 |
| 196.0980 | 160.41 | 15.33 | 14.54 | 14.46 | 14.80 | 1.15 |
| 196.1062 | 158.84 | 14.82 | 13.47 | 12.15 | 12.31 | 1.08 |
| 196.1076 | 60.28  | 14.91 | 12.38 | 14.71 | 14.87 | 0.75 |
| 196.1344 | 139.2  | 14.73 | 13.72 | 13.91 | 14.29 | 0.97 |
| 196.9006 | 116.48 | 17.87 | 16.48 | 16.54 | 17.50 | 1.01 |
| 196.9106 | 292.36 | 17.64 | 17.39 | 17.34 | 17.49 | 0.37 |
| 196.9255 | 97.09  | 15.13 | 15.57 | 15.67 | 15.34 | 0.28 |
| 196.9329 | 17.69  | 15.82 | 17.43 | 17.21 | 17.01 | 1.61 |
| 196.9414 | 18.3   | 14.24 | 15.57 | 15.87 | 15.60 | 1.17 |
| 196.9471 | 44.97  | 23.72 | 24.16 | 24.67 | 24.50 | 1.47 |
| 196.9512 | 16.72  | 15.55 | 16.87 | 16.79 | 16.58 | 1.16 |
| 196.9660 | 92.71  | 14.03 | 14.01 | 14.01 | 14.44 | 0.03 |
| 196.9955 | 32.39  | 16.06 | 16.36 | 15.98 | 15.88 | 0.11 |
| 197.0044 | 148.26 | 16.51 | 17.04 | 17.42 | 17.85 | 0.92 |
| 197.0223 | 167.99 | 15.25 | 14.80 | 14.56 | 15.23 | 0.65 |
| 197.0226 | 19.64  | 16.69 | 16.91 | 16.81 | 16.82 | 0.28 |
| 197.0459 | 171.4  | 15.78 | 14.89 | 14.46 | 14.85 | 1.06 |
| 197.0469 | 290.99 | 16.39 | 15.51 | 14.69 | 14.04 | 0.68 |
| 197.0570 | 149.68 | 15.36 | 14.24 | 14.16 | 14.89 | 1.14 |
| 197.0580 | 290.83 | 18.35 | 16.77 | 16.90 | 16.98 | 1.57 |
| 197.0610 | 85.55  | 13.18 | 13.33 | 13.53 | 13.69 | 0.19 |
| 197.0674 | 27.72  | 14.94 | 15.20 | 15.15 | 14.77 | 0.14 |
| 197.0783 | 23.15  | 16.18 | 15.94 | 15.96 | 16.05 | 0.23 |
| 197.0831 | 285.57 | 18.53 | 17.04 | 16.80 | 16.90 | 1.53 |
| 197.0932 | 148.01 | 14.66 | 14.29 | 14.02 | 14.33 | 0.66 |
| 197.0936 | 20.4   | 13.61 | 16.45 | 10.77 | 11.64 | 0.02 |
| 197.0971 | 192.5  | 16.10 | 15.29 | 15.16 | 15.54 | 0.84 |
| 197.1183 | 273.64 | 19.08 | 18.30 | 18.40 | 18.31 | 1.24 |
| 197.1298 | 23.66  | 9.98  | 15.97 | 8.89  | 9.68  | 0.89 |
| 197.1547 | 184.6  | 17.75 | 16.58 | 16.39 | 16.86 | 1.23 |
| 197.9403 | 26.98  | 20.84 | 18.41 | 18.88 | 19.03 | 1.10 |
| 197.9505 | 45.37  | 18.19 | 18.71 | 19.32 | 19.12 | 1.52 |
| 197.9707 | 25.89  | 18.00 | 19.83 | 19.97 | 19.46 | 1.95 |
| 198.0419 | 292.03 | 17.21 | 16.89 | 16.88 | 17.09 | 0.43 |
| 198.0522 | 168.13 | 18.34 | 18.39 | 18.54 | 18.49 | 0.12 |
| 198.0675 | 212    | 14.59 | 7.80  | 8.04  | 8.26  | 1.65 |
| 198.0737 | 27.07  | 20.94 | 20.19 | 20.45 | 20.38 | 0.95 |
| 198.0784 | 258.2  | 21.62 | 20.36 | 20.58 | 20.35 | 1.30 |
| 198.0885 | 179.8  | 15.31 | 14.18 | 14.03 | 14.30 | 0.92 |
| 198.1136 | 190.59 | 16.40 | 16.14 | 15.98 | 16.08 | 0.54 |
| 198.1217 | 189.96 | 16.55 | 15.69 | 15.59 | 15.92 | 1.05 |
| 198.8925 | 151.03 | 14.78 | 11.85 | 10.27 | 14.01 | 1.32 |
| 198.8974 | 106.7  | 17.40 | 15.75 | 15.60 | 16.32 | 1.51 |
| 198.9054 | 96.84  | 15.68 | 16.27 | 16.29 | 16.03 | 1.12 |
| 198.9182 | 23.08  | 17.25 | 18.57 | 18.77 | 18.72 | 1.51 |
| 198.9446 | 57.48  | 19.62 | 20.08 | 20.53 | 20.40 | 1.54 |

|          |        |       |       |       |       |      |
|----------|--------|-------|-------|-------|-------|------|
| 198.9513 | 51.62  | 16.29 | 16.68 | 17.18 | 17.03 | 1.39 |
| 199.0016 | 25.43  | 17.32 | 17.37 | 17.72 | 18.15 | 0.25 |
| 199.0074 | 22.13  | 10.61 | 12.00 | 11.79 | 11.84 | 0.37 |
| 199.0222 | 25.52  | 14.77 | 14.43 | 14.38 | 14.47 | 0.26 |
| 199.0339 | 32.4   | 17.05 | 16.52 | 16.88 | 16.80 | 0.56 |
| 199.0381 | 21.49  | 18.69 | 21.12 | 20.72 | 20.97 | 1.40 |
| 199.0532 | 32.36  | 15.22 | 14.86 | 14.43 | 14.55 | 0.35 |
| 199.0624 | 289.27 | 18.48 | 17.18 | 17.33 | 17.17 | 1.64 |
| 199.0712 | 44.93  | 15.34 | 16.48 | 16.83 | 16.78 | 0.72 |
| 199.0737 | 290.47 | 20.21 | 18.00 | 18.22 | 18.17 | 2.14 |
| 199.0784 | 32.59  | 16.40 | 14.91 | 15.15 | 14.81 | 1.24 |
| 199.0818 | 290.3  | 18.11 | 16.31 | 16.33 | 16.63 | 1.76 |
| 199.0977 | 273.51 | 18.05 | 17.50 | 17.63 | 17.72 | 0.62 |
| 199.1089 | 151.88 | 15.06 | 14.96 | 14.63 | 15.39 | 0.24 |
| 199.1340 | 112.92 | 20.53 | 16.85 | 18.33 | 19.86 | 1.00 |
| 199.1340 | 259.52 | 19.41 | 18.16 | 18.32 | 18.72 | 1.20 |
| 199.1456 | 18.65  | 5.89  | 19.99 | 5.71  | 5.44  | 1.16 |
| 199.1704 | 247.21 | 19.90 | 18.65 | 18.77 | 18.86 | 1.46 |
| 199.9374 | 26.86  | 19.04 | 16.94 | 17.01 | 17.10 | 1.03 |
| 199.9685 | 24.25  | 16.21 | 17.98 | 18.20 | 18.23 | 1.80 |
| 200.0179 | 26.36  | 16.64 | 16.89 | 17.24 | 16.58 | 0.40 |
| 200.0333 | 51.26  | 17.34 | 15.21 | 15.70 | 15.51 | 1.48 |
| 200.0415 | 20.28  | 14.49 | 15.95 | 15.05 | 15.89 | 0.57 |
| 200.0576 | 288.9  | 19.70 | 18.25 | 18.41 | 17.84 | 1.80 |
| 200.0832 | 211.38 | 15.25 | 8.76  | 8.65  | 8.75  | 1.94 |
| 200.0942 | 267.22 | 20.98 | 18.80 | 19.21 | 19.43 | 1.78 |
| 200.1011 | 141.52 | 15.58 | 14.66 | 14.74 | 15.24 | 1.16 |
| 200.1292 | 186.88 | 16.63 | 16.14 | 15.93 | 16.37 | 0.93 |
| 200.1373 | 194.39 | 18.23 | 16.92 | 16.52 | 17.93 | 1.10 |
| 200.1489 | 22.31  | 14.61 | 15.96 | 13.17 | 13.63 | 0.02 |
| 200.1737 | 200.04 | 17.66 | 16.28 | 15.95 | 16.68 | 1.51 |
| 200.1740 | 85.72  | 15.65 | 11.88 | 12.44 | 13.44 | 1.58 |
| 200.8896 | 26.85  | 11.92 | 11.44 | 12.10 | 10.08 | 0.11 |
| 200.8926 | 124.26 | 16.41 | 15.26 | 15.18 | 15.56 | 1.00 |
| 200.9082 | 29.82  | 14.21 | 13.89 | 14.45 | 13.76 | 0.08 |
| 200.9239 | 161.92 | 14.74 | 15.29 | 15.09 | 15.21 | 0.69 |
| 200.9731 | 19.61  | 12.64 | 16.72 | 16.56 | 16.31 | 1.62 |
| 201.0020 | 29.55  | 16.25 | 15.47 | 14.92 | 15.43 | 0.95 |
| 201.0388 | 203.93 | 16.03 | 17.70 | 17.87 | 18.08 | 1.34 |
| 201.0418 | 290.98 | 16.52 | 14.72 | 12.79 | 11.65 | 1.02 |
| 201.0521 | 291.4  | 15.73 | 16.28 | 16.13 | 16.88 | 0.52 |
| 201.0525 | 19.17  | 15.34 | 15.59 | 15.36 | 15.64 | 0.20 |
| 201.0649 | 91.46  | 14.20 | 14.38 | 14.29 | 14.42 | 0.14 |
| 201.0712 | 177.23 | 8.09  | 13.40 | 12.79 | 11.10 | 1.44 |
| 201.0716 | 19.96  | 15.21 | 16.33 | 14.97 | 15.14 | 0.20 |
| 201.0779 | 285.47 | 18.80 | 17.49 | 17.39 | 17.53 | 1.55 |
| 201.0887 | 289.13 | 19.29 | 18.05 | 18.10 | 18.24 | 1.94 |
| 201.0976 | 287.36 | 16.99 | 15.89 | 16.15 | 16.11 | 0.55 |
| 201.1132 | 290.21 | 18.38 | 17.81 | 17.91 | 18.24 | 0.69 |
| 201.1248 | 21.69  | 14.47 | 16.24 | 15.01 | 15.56 | 0.56 |
| 201.1359 | 85.96  | 14.96 | 15.20 | 14.88 | 16.28 | 0.24 |
| 201.1497 | 282.7  | 17.32 | 16.68 | 16.68 | 16.99 | 0.70 |
| 201.1497 | 169.12 | 18.16 | 17.21 | 17.23 | 17.98 | 0.92 |
| 201.7443 | 227.47 | 15.33 | 12.14 | 12.09 | 13.40 | 1.28 |
| 201.8024 | 19.26  | 16.16 | 15.83 | 15.77 | 16.20 | 0.19 |
| 201.9886 | 248.85 | 18.86 | 18.14 | 18.14 | 18.36 | 0.97 |
| 202.0125 | 31.83  | 17.19 | 15.96 | 16.07 | 15.85 | 0.91 |
| 202.0393 | 29.47  | 15.57 | 14.96 | 15.51 | 16.35 | 0.19 |
| 202.0491 | 30.19  | 16.53 | 15.37 | 15.63 | 16.03 | 1.26 |
| 202.0621 | 92.36  | 15.62 | 15.80 | 15.98 | 16.23 | 0.42 |
| 202.0733 | 289.96 | 20.08 | 18.06 | 18.46 | 18.28 | 1.84 |
| 202.0911 | 22.38  | 8.89  | 16.12 | 16.55 | 10.37 | 1.24 |

|          |        |       |       |       |       |      |
|----------|--------|-------|-------|-------|-------|------|
| 202.1090 | 19.01  | 16.51 | 16.57 | 16.37 | 16.49 | 0.03 |
| 202.1091 | 175.55 | 15.64 | 14.85 | 14.63 | 14.74 | 0.96 |
| 202.1167 | 150.74 | 16.02 | 15.49 | 15.47 | 15.74 | 0.68 |
| 202.8924 | 54.11  | 17.00 | 15.11 | 15.37 | 15.62 | 1.47 |
| 202.9044 | 42.14  | 15.00 | 16.66 | 12.53 | 12.76 | 0.20 |
| 202.9131 | 52.81  | 17.97 | 16.32 | 16.98 | 17.62 | 1.36 |
| 202.9874 | 196.58 | 19.09 | 17.86 | 17.98 | 17.07 | 1.01 |
| 202.9979 | 33.38  | 16.15 | 14.64 | 16.24 | 16.16 | 0.39 |
| 203.0197 | 29.6   | 20.14 | 19.12 | 19.16 | 19.63 | 1.22 |
| 203.0424 | 159.63 | 15.73 | 15.79 | 15.62 | 16.08 | 0.05 |
| 203.0427 | 17.08  | 17.97 | 18.24 | 17.96 | 18.13 | 0.30 |
| 203.0459 | 30.38  | 17.16 | 16.57 | 16.41 | 16.14 | 0.74 |
| 203.0574 | 289.52 | 18.12 | 17.58 | 17.53 | 17.16 | 1.03 |
| 203.0784 | 132.2  | 13.88 | 14.47 | 14.72 | 15.13 | 0.77 |
| 203.0829 | 22.08  | 21.49 | 20.83 | 21.08 | 21.21 | 1.12 |
| 203.0938 | 281.95 | 18.16 | 16.91 | 16.96 | 16.85 | 1.56 |
| 203.1042 | 18.36  | 16.65 | 17.38 | 17.61 | 17.18 | 1.28 |
| 203.1066 | 176.44 | 14.88 | 13.51 | 13.84 | 13.29 | 0.75 |
| 203.1290 | 155.54 | 14.96 | 14.28 | 14.74 | 14.68 | 0.59 |
| 203.1806 | 209.05 | 15.65 | 14.54 | 14.97 | 14.62 | 0.58 |
| 203.1807 | 99.36  | 11.28 | 7.54  | 11.21 | 10.28 | 0.65 |
| 204.0050 | 20.41  | 18.46 | 18.38 | 17.88 | 18.57 | 0.36 |
| 204.0218 | 35.6   | 15.52 | 11.44 | 11.04 | 12.67 | 1.97 |
| 204.0339 | 18.43  | 17.01 | 17.06 | 17.49 | 17.76 | 0.31 |
| 204.0521 | 186.57 | 17.44 | 16.15 | 15.88 | 16.38 | 1.41 |
| 204.0527 | 291.49 | 16.63 | 16.63 | 16.59 | 16.15 | 0.09 |
| 204.0611 | 207.78 | 13.88 | 7.95  | 8.27  | 8.33  | 1.75 |
| 204.0670 | 22.3   | 16.36 | 16.33 | 15.51 | 15.61 | 0.32 |
| 204.0711 | 19.06  | 15.19 | 13.22 | 14.10 | 15.50 | 0.61 |
| 204.0781 | 212.89 | 16.39 | 9.92  | 10.17 | 9.87  | 1.39 |
| 204.0890 | 286.51 | 18.94 | 17.47 | 17.72 | 17.49 | 1.54 |
| 204.1244 | 23.49  | 15.39 | 15.72 | 15.38 | 14.64 | 0.04 |
| 204.8898 | 43.09  | 15.27 | 10.99 | 14.68 | 14.97 | 0.96 |
| 204.9134 | 167.36 | 17.45 | 20.70 | 20.93 | 20.43 | 1.99 |
| 204.9441 | 20.19  | 14.04 | 8.48  | 8.54  | 11.51 | 1.85 |
| 204.9708 | 151.39 | 18.17 | 16.62 | 16.04 | 16.93 | 1.57 |
| 204.9912 | 53.5   | 15.90 | 17.95 | 12.17 | 13.39 | 0.30 |
| 204.9991 | 18.47  | 12.85 | 15.99 | 15.50 | 15.74 | 1.30 |
| 205.0180 | 22.81  | 16.86 | 16.67 | 16.54 | 16.94 | 0.28 |
| 205.0363 | 143.82 | 16.40 | 16.12 | 15.42 | 16.33 | 0.56 |
| 205.0620 | 91.15  | 14.96 | 13.33 | 14.41 | 14.19 | 0.93 |
| 205.0731 | 286.85 | 20.98 | 19.20 | 19.52 | 19.21 | 1.94 |
| 205.0872 | 176.46 | 16.29 | 15.34 | 15.97 | 15.81 | 0.75 |
| 205.0927 | 208.3  | 14.75 | 9.19  | 8.43  | 9.94  | 1.73 |
| 205.1235 | 189.75 | 16.83 | 16.21 | 16.21 | 16.06 | 0.81 |
| 205.1599 | 218.29 | 19.28 | 20.04 | 20.24 | 19.19 | 1.07 |
| 205.1964 | 234.15 | 17.43 | 16.27 | 16.71 | 17.00 | 1.37 |
| 205.9169 | 92.69  | 14.73 | 13.44 | 13.71 | 13.78 | 0.55 |
| 206.0022 | 25.35  | 17.27 | 16.32 | 16.16 | 16.80 | 1.11 |
| 206.0111 | 30.6   | 17.99 | 16.90 | 16.83 | 16.80 | 1.50 |
| 206.0579 | 109.39 | 15.72 | 13.80 | 14.18 | 14.35 | 1.60 |
| 206.0671 | 210.82 | 19.96 | 19.00 | 18.80 | 19.33 | 0.67 |
| 206.0843 | 148.99 | 14.78 | 13.42 | 13.86 | 14.56 | 0.76 |
| 206.0938 | 213.16 | 15.24 | 10.43 | 10.13 | 10.91 | 1.17 |
| 206.1038 | 25.34  | 20.59 | 20.19 | 20.69 | 20.64 | 0.30 |
| 206.1042 | 193.75 | 16.21 | 16.39 | 15.41 | 15.30 | 0.34 |
| 206.1633 | 215.18 | 15.98 | 16.62 | 16.96 | 15.80 | 0.92 |
| 206.9115 | 106.8  | 17.16 | 15.65 | 15.98 | 15.98 | 1.44 |
| 206.9678 | 105.35 | 15.96 | 15.08 | 15.17 | 16.26 | 0.69 |
| 206.9891 | 27.73  | 15.40 | 15.38 | 14.27 | 14.77 | 0.37 |
| 207.0511 | 290.27 | 17.85 | 17.79 | 17.69 | 17.87 | 0.20 |
| 207.0511 | 194.68 | 19.01 | 19.32 | 19.08 | 18.70 | 0.13 |

|          |        |       |       |       |       |      |
|----------|--------|-------|-------|-------|-------|------|
| 207.0665 | 161.35 | 15.87 | 15.54 | 15.53 | 15.55 | 0.59 |
| 207.0705 | 158.1  | 16.27 | 14.44 | 14.43 | 15.00 | 1.64 |
| 207.0779 | 23.69  | 15.49 | 14.45 | 14.12 | 14.20 | 0.58 |
| 207.0888 | 90.83  | 16.12 | 14.25 | 14.39 | 14.74 | 1.73 |
| 207.1028 | 212.82 | 17.87 | 17.78 | 18.02 | 17.79 | 0.00 |
| 207.1073 | 26.54  | 16.46 | 15.68 | 16.14 | 16.19 | 0.91 |
| 207.1392 | 167.68 | 15.94 | 13.81 | 14.60 | 14.72 | 1.56 |
| 207.9325 | 86.98  | 16.07 | 14.50 | 14.63 | 14.94 | 1.46 |
| 207.9690 | 37.07  | 21.45 | 20.73 | 21.20 | 20.31 | 0.40 |
| 207.9902 | 27.74  | 13.81 | 14.28 | 14.42 | 14.33 | 0.38 |
| 207.9996 | 31.39  | 19.67 | 21.34 | 21.54 | 20.61 | 1.92 |
| 208.0183 | 18.92  | 17.47 | 18.57 | 18.63 | 18.52 | 1.40 |
| 208.0388 | 17.45  | 16.56 | 16.75 | 16.52 | 16.53 | 0.07 |
| 208.0546 | 133.64 | 15.45 | 14.43 | 13.86 | 14.65 | 1.30 |
| 208.0629 | 292.65 | 17.70 | 16.54 | 16.67 | 16.88 | 1.45 |
| 208.0827 | 274.29 | 18.63 | 17.71 | 17.40 | 18.01 | 1.17 |
| 208.0917 | 153.74 | 14.29 | 14.34 | 13.93 | 13.26 | 0.14 |
| 208.0986 | 163.33 | 15.05 | 14.30 | 14.27 | 14.82 | 0.93 |
| 208.1194 | 56.53  | 18.46 | 16.96 | 17.90 | 18.35 | 0.99 |
| 208.9212 | 142.9  | 18.55 | 16.90 | 16.70 | 17.69 | 1.50 |
| 208.9214 | 30.48  | 16.44 | 17.00 | 17.17 | 16.34 | 0.52 |
| 208.9346 | 148.12 | 15.55 | 13.89 | 14.01 | 15.29 | 0.98 |
| 208.9738 | 125.51 | 10.75 | 14.58 | 14.52 | 14.35 | 1.64 |
| 208.9853 | 29.63  | 23.23 | 23.26 | 23.23 | 23.67 | 0.12 |
| 209.0044 | 192.16 | 16.51 | 15.26 | 15.22 | 15.80 | 1.35 |
| 209.0045 | 45.79  | 18.42 | 17.12 | 17.22 | 17.16 | 0.86 |
| 209.0196 | 17.95  | 14.96 | 15.69 | 15.57 | 15.96 | 0.62 |
| 209.0307 | 19.04  | 19.99 | 22.41 | 22.21 | 22.15 | 2.00 |
| 209.0457 | 146    | 14.86 | 14.42 | 13.90 | 14.44 | 0.76 |
| 209.0581 | 290.53 | 17.03 | 15.73 | 15.83 | 15.80 | 0.94 |
| 209.0668 | 162.57 | 19.76 | 19.76 | 20.09 | 19.60 | 0.09 |
| 209.0833 | 156.8  | 16.37 | 14.25 | 13.79 | 14.65 | 1.59 |
| 209.0836 | 289.21 | 16.60 | 11.68 | 11.30 | 12.18 | 1.76 |
| 209.1184 | 272.71 | 18.16 | 17.23 | 17.31 | 17.19 | 1.52 |
| 209.1549 | 167.28 | 15.44 | 14.59 | 14.57 | 14.65 | 0.97 |
| 209.9673 | 31.5   | 16.75 | 16.12 | 16.04 | 15.52 | 0.51 |
| 209.9898 | 26.54  | 18.79 | 18.74 | 18.78 | 19.24 | 0.03 |
| 209.9995 | 32.94  | 17.38 | 17.28 | 17.39 | 17.07 | 0.14 |
| 210.0344 | 19.24  | 15.60 | 17.60 | 17.46 | 17.44 | 1.79 |
| 210.0541 | 160.77 | 16.66 | 15.58 | 15.45 | 16.24 | 1.26 |
| 210.0599 | 27.7   | 13.90 | 14.62 | 12.07 | 12.71 | 0.43 |
| 210.0656 | 24.07  | 16.17 | 15.98 | 15.80 | 16.14 | 0.35 |
| 210.0703 | 125.12 | 15.93 | 15.43 | 15.69 | 15.50 | 0.65 |
| 210.0704 | 22.55  | 15.99 | 15.88 | 15.94 | 15.77 | 0.12 |
| 210.0786 | 270.91 | 20.61 | 19.06 | 19.46 | 19.31 | 1.51 |
| 210.0892 | 179.69 | 17.86 | 16.88 | 17.17 | 17.35 | 1.04 |
| 210.1138 | 135.6  | 14.81 | 14.00 | 13.57 | 13.86 | 1.13 |
| 210.1218 | 145.57 | 15.17 | 13.93 | 13.80 | 13.67 | 1.23 |
| 210.8821 | 88.63  | 15.03 | 15.62 | 15.51 | 15.29 | 0.88 |
| 210.9183 | 151.17 | 16.22 | 14.99 | 14.57 | 15.35 | 1.61 |
| 210.9371 | 28.95  | 17.25 | 17.73 | 18.30 | 17.08 | 0.72 |
| 210.9628 | 45.17  | 20.65 | 20.09 | 20.61 | 20.61 | 0.50 |
| 210.9834 | 26.42  | 21.42 | 21.43 | 21.44 | 21.90 | 0.13 |
| 210.9911 | 22.36  | 16.20 | 15.33 | 15.04 | 15.89 | 0.73 |
| 211.0286 | 20.99  | 16.18 | 16.99 | 16.00 | 15.76 | 0.23 |
| 211.0466 | 158.41 | 14.90 | 13.87 | 13.67 | 14.09 | 1.08 |
| 211.0558 | 32.1   | 16.19 | 16.32 | 16.28 | 16.30 | 0.13 |
| 211.0617 | 178.06 | 16.16 | 15.07 | 15.31 | 15.36 | 1.21 |
| 211.0738 | 278.02 | 20.35 | 18.89 | 19.06 | 18.85 | 1.72 |
| 211.0820 | 290.01 | 16.72 | 14.39 | 15.05 | 15.27 | 1.05 |
| 211.0978 | 286.54 | 17.15 | 17.10 | 17.02 | 17.18 | 0.12 |
| 211.0978 | 21.44  | 16.33 | 15.58 | 15.57 | 15.64 | 1.35 |

|          |        |       |       |       |       |      |
|----------|--------|-------|-------|-------|-------|------|
| 211.1091 | 47.27  | 14.08 | 14.79 | 10.45 | 10.24 | 0.47 |
| 211.1340 | 264.74 | 18.84 | 18.24 | 18.19 | 18.03 | 0.99 |
| 211.1705 | 181.68 | 16.69 | 14.86 | 14.82 | 15.93 | 1.46 |
| 211.9710 | 29.53  | 15.21 | 15.31 | 15.02 | 15.26 | 0.01 |
| 211.9867 | 26.69  | 16.83 | 16.61 | 16.58 | 17.13 | 0.23 |
| 212.0028 | 19     | 20.82 | 20.89 | 21.03 | 21.36 | 0.22 |
| 212.0217 | 27.41  | 15.87 | 16.79 | 16.90 | 15.98 | 0.84 |
| 212.0333 | 176.09 | 16.03 | 15.48 | 15.00 | 16.42 | 0.53 |
| 212.0510 | 158.06 | 14.63 | 12.18 | 8.92  | 12.15 | 1.22 |
| 212.0578 | 290.85 | 18.44 | 17.02 | 16.98 | 17.04 | 1.74 |
| 212.0680 | 290.72 | 16.98 | 16.80 | 16.57 | 17.11 | 0.32 |
| 212.0772 | 290.14 | 16.40 | 14.35 | 13.44 | 14.23 | 1.14 |
| 212.0943 | 266.56 | 20.47 | 18.68 | 19.04 | 19.29 | 1.57 |
| 212.1041 | 163.91 | 15.00 | 14.15 | 13.86 | 14.63 | 1.00 |
| 212.1294 | 154.73 | 15.25 | 14.70 | 13.96 | 14.52 | 0.92 |
| 212.1374 | 189.67 | 17.41 | 16.31 | 16.37 | 16.42 | 1.38 |
| 212.8873 | 25.77  | 16.68 | 16.60 | 16.16 | 17.09 | 0.21 |
| 212.9212 | 48.66  | 22.46 | 22.48 | 23.17 | 23.04 | 0.76 |
| 212.9341 | 35.4   | 15.75 | 15.56 | 16.13 | 14.80 | 0.05 |
| 212.9415 | 81.14  | 15.36 | 14.03 | 14.83 | 15.50 | 0.91 |
| 212.9610 | 43.82  | 15.92 | 15.22 | 15.61 | 15.85 | 0.73 |
| 212.9698 | 37.97  | 14.90 | 15.08 | 15.41 | 14.36 | 0.16 |
| 212.9786 | 114.31 | 12.03 | 14.05 | 16.71 | 14.94 | 1.00 |
| 212.9807 | 20.04  | 15.82 | 17.00 | 17.26 | 17.08 | 1.19 |
| 213.0008 | 25.04  | 15.83 | 15.92 | 16.18 | 17.04 | 0.29 |
| 213.0063 | 19.2   | 16.86 | 16.97 | 17.03 | 17.35 | 0.25 |
| 213.0073 | 162.2  | 14.24 | 14.71 | 14.58 | 15.03 | 0.36 |
| 213.0154 | 290.62 | 14.50 | 13.94 | 15.69 | 17.12 | 0.30 |
| 213.0168 | 172.64 | 14.24 | 13.66 | 12.74 | 13.87 | 0.51 |
| 213.0175 | 21.74  | 16.92 | 16.79 | 15.34 | 15.30 | 0.55 |
| 213.0257 | 293.66 | 17.52 | 17.39 | 17.43 | 17.79 | 0.10 |
| 213.0410 | 167.28 | 14.27 | 14.26 | 14.16 | 14.36 | 0.04 |
| 213.0496 | 30.52  | 20.82 | 21.03 | 21.15 | 20.88 | 0.38 |
| 213.0551 | 169.42 | 15.48 | 14.64 | 14.44 | 14.97 | 1.23 |
| 213.0555 | 29.42  | 19.88 | 17.88 | 17.56 | 17.58 | 1.60 |
| 213.0671 | 193.85 | 19.49 | 18.13 | 18.18 | 18.64 | 2.04 |
| 213.0714 | 55.23  | 20.06 | 20.24 | 20.08 | 19.86 | 0.08 |
| 213.0779 | 289.52 | 17.65 | 16.80 | 16.75 | 16.97 | 1.17 |
| 213.0859 | 44.84  | 19.28 | 20.35 | 21.36 | 20.87 | 1.03 |
| 213.0893 | 282.75 | 22.50 | 20.68 | 20.81 | 20.68 | 2.18 |
| 213.0975 | 287.88 | 17.01 | 15.40 | 16.09 | 15.84 | 0.58 |
| 213.1133 | 245.78 | 19.20 | 17.56 | 17.46 | 17.69 | 1.39 |
| 213.1496 | 283.45 | 18.60 | 18.19 | 18.07 | 18.35 | 0.66 |
| 213.1861 | 249.4  | 19.60 | 18.05 | 17.75 | 18.23 | 1.71 |
| 213.9247 | 52.57  | 16.82 | 16.29 | 17.53 | 17.35 | 0.13 |
| 213.9449 | 26.64  | 14.88 | 15.15 | 15.87 | 14.87 | 0.18 |
| 213.9771 | 26.78  | 15.33 | 15.71 | 15.34 | 14.94 | 0.11 |
| 213.9987 | 22.58  | 15.93 | 15.16 | 15.47 | 15.90 | 0.40 |
| 214.0183 | 27.89  | 12.76 | 13.39 | 13.92 | 12.71 | 0.47 |
| 214.0243 | 36.82  | 16.88 | 16.19 | 16.12 | 15.94 | 0.45 |
| 214.0325 | 158.88 | 13.71 | 13.76 | 14.32 | 13.75 | 0.22 |
| 214.0338 | 25.69  | 18.08 | 18.94 | 18.98 | 18.38 | 1.02 |
| 214.0491 | 22.97  | 23.57 | 24.15 | 24.09 | 23.90 | 1.01 |
| 214.0734 | 291.42 | 20.07 | 17.97 | 18.28 | 18.07 | 2.00 |
| 214.0830 | 56.77  | 20.41 | 21.85 | 22.52 | 21.78 | 1.28 |
| 214.0892 | 52.91  | 15.09 | 15.98 | 16.56 | 16.33 | 0.87 |
| 214.0929 | 293.58 | 17.96 | 17.13 | 16.99 | 16.98 | 1.09 |
| 214.1030 | 138.31 | 15.06 | 16.48 | 16.69 | 16.06 | 1.43 |
| 214.1099 | 287.23 | 18.29 | 16.76 | 16.67 | 16.77 | 1.81 |
| 214.1166 | 177.54 | 16.58 | 15.29 | 15.63 | 15.87 | 1.51 |
| 214.1450 | 158.44 | 16.75 | 16.22 | 16.52 | 16.40 | 0.53 |
| 214.1531 | 185.85 | 16.79 | 15.64 | 15.72 | 16.28 | 1.07 |

|          |        |       |       |       |       |      |
|----------|--------|-------|-------|-------|-------|------|
| 214.1895 | 197.98 | 17.27 | 15.24 | 15.19 | 16.01 | 1.55 |
| 214.8716 | 88.97  | 16.02 | 15.75 | 15.88 | 15.98 | 0.37 |
| 214.8846 | 25.87  | 15.70 | 16.07 | 15.64 | 16.51 | 0.20 |
| 214.8921 | 97.1   | 9.41  | 12.87 | 13.83 | 13.63 | 1.23 |
| 214.9213 | 37.31  | 19.44 | 18.99 | 20.16 | 20.02 | 0.16 |
| 214.9343 | 31.53  | 16.45 | 17.29 | 17.44 | 17.11 | 1.57 |
| 214.9550 | 168.3  | 14.70 | 14.28 | 14.42 | 15.35 | 0.23 |
| 214.9710 | 28.63  | 14.87 | 15.20 | 15.05 | 15.04 | 0.23 |
| 214.9966 | 82.9   | 11.11 | 12.88 | 13.78 | 14.95 | 0.84 |
| 215.0232 | 286.04 | 20.44 | 21.04 | 20.66 | 21.22 | 0.80 |
| 215.0331 | 22.57  | 25.26 | 25.90 | 25.64 | 25.79 | 0.85 |
| 215.0443 | 66.8   | 15.31 | 15.85 | 17.31 | 17.42 | 0.75 |
| 215.0570 | 198.92 | 17.25 | 13.08 | 13.06 | 13.54 | 1.34 |
| 215.0575 | 289.09 | 16.77 | 16.67 | 16.64 | 16.51 | 0.16 |
| 215.0684 | 291.47 | 18.14 | 16.82 | 16.60 | 16.98 | 1.78 |
| 215.0864 | 54.03  | 16.25 | 17.36 | 17.98 | 17.50 | 1.21 |
| 215.0930 | 180.74 | 18.38 | 18.28 | 18.23 | 17.72 | 0.24 |
| 215.0932 | 286.38 | 17.40 | 16.85 | 16.89 | 17.05 | 0.68 |
| 215.1052 | 291.66 | 17.78 | 16.53 | 16.63 | 16.72 | 1.35 |
| 215.1290 | 288.91 | 17.95 | 17.79 | 17.70 | 18.17 | 0.24 |
| 215.1654 | 182.94 | 18.90 | 17.75 | 17.99 | 18.39 | 1.50 |
| 216.0316 | 30.28  | 18.88 | 17.94 | 18.40 | 18.21 | 0.90 |
| 216.0367 | 18.2   | 21.11 | 21.69 | 21.32 | 21.49 | 0.65 |
| 216.0526 | 21.36  | 16.97 | 16.92 | 16.87 | 17.10 | 0.10 |
| 216.0528 | 291.08 | 17.07 | 16.93 | 16.86 | 16.54 | 0.25 |
| 216.0783 | 210.39 | 15.08 | 9.52  | 9.20  | 9.60  | 2.09 |
| 216.0891 | 284.42 | 19.64 | 18.13 | 18.37 | 18.10 | 1.68 |
| 216.1691 | 100.43 | 15.31 | 15.01 | 13.77 | 14.45 | 0.78 |
| 216.8982 | 80.12  | 16.70 | 17.67 | 17.84 | 17.94 | 1.60 |
| 216.9191 | 113.13 | 15.64 | 15.61 | 15.74 | 16.12 | 0.17 |
| 216.9290 | 23.72  | 18.13 | 18.99 | 19.07 | 19.32 | 1.16 |
| 216.9707 | 162.91 | 14.88 | 14.95 | 14.70 | 15.80 | 0.07 |
| 216.9791 | 19.28  | 15.06 | 13.99 | 14.68 | 15.19 | 0.35 |
| 217.0032 | 201.41 | 18.87 | 17.36 | 17.43 | 16.59 | 1.13 |
| 217.0124 | 61.85  | 17.26 | 17.67 | 18.76 | 18.53 | 0.85 |
| 217.0303 | 21.6   | 23.64 | 24.24 | 23.89 | 24.04 | 0.70 |
| 217.0367 | 22.49  | 17.90 | 18.34 | 18.19 | 18.09 | 0.54 |
| 217.0490 | 22.82  | 17.23 | 17.30 | 17.02 | 17.55 | 0.01 |
| 217.0555 | 17.16  | 16.88 | 16.27 | 15.91 | 15.95 | 0.77 |
| 217.0731 | 289.21 | 17.47 | 16.71 | 16.90 | 16.78 | 1.03 |
| 217.0835 | 19.26  | 17.70 | 17.99 | 18.25 | 18.44 | 0.65 |
| 217.0844 | 289.31 | 17.51 | 16.41 | 16.68 | 16.26 | 0.99 |
| 217.0927 | 209.53 | 15.28 | 8.96  | 9.65  | 9.82  | 1.72 |
| 217.1092 | 203.59 | 17.35 | 16.92 | 16.79 | 16.55 | 0.78 |
| 217.1198 | 22.26  | 16.76 | 17.03 | 17.18 | 17.26 | 0.81 |
| 217.4759 | 18.11  | 13.35 | 15.35 | 17.46 | 17.33 | 1.36 |
| 217.5816 | 66.1   | 14.04 | 15.27 | 12.34 | 12.93 | 0.17 |
| 218.0089 | 70.09  | 13.90 | 14.71 | 14.96 | 14.98 | 0.92 |
| 218.0352 | 20.66  | 19.68 | 20.81 | 20.52 | 20.41 | 1.62 |
| 218.0673 | 192.3  | 20.62 | 21.30 | 21.07 | 21.85 | 0.58 |
| 218.0939 | 209.18 | 13.93 | 10.75 | 11.26 | 8.99  | 0.78 |
| 218.1040 | 17.47  | 21.83 | 22.12 | 22.17 | 22.39 | 0.52 |
| 218.8778 | 74.76  | 15.94 | 17.35 | 18.02 | 17.23 | 1.85 |
| 218.8873 | 77.95  | 16.00 | 15.71 | 16.11 | 16.47 | 0.09 |
| 218.9502 | 36.14  | 21.11 | 22.09 | 21.75 | 21.68 | 0.81 |
| 218.9636 | 145.7  | 16.31 | 14.74 | 15.41 | 15.88 | 1.13 |
| 218.9860 | 164.05 | 14.97 | 15.06 | 14.83 | 15.10 | 0.00 |
| 218.9945 | 31.8   | 17.37 | 14.38 | 13.96 | 15.84 | 1.22 |
| 219.0151 | 26.12  | 21.89 | 21.28 | 21.53 | 21.78 | 0.67 |
| 219.0365 | 22.22  | 18.56 | 17.80 | 17.46 | 17.82 | 1.33 |
| 219.0468 | 21.75  | 19.05 | 19.11 | 19.03 | 18.93 | 0.02 |
| 219.0519 | 167.06 | 15.69 | 15.64 | 15.52 | 15.47 | 0.21 |

|          |        |       |       |       |       |      |
|----------|--------|-------|-------|-------|-------|------|
| 219.0708 | 20.88  | 16.48 | 14.89 | 14.29 | 15.24 | 1.80 |
| 219.0888 | 288.41 | 17.53 | 16.31 | 16.70 | 16.41 | 1.19 |
| 219.1024 | 169.44 | 16.05 | 14.94 | 15.36 | 15.49 | 1.09 |
| 219.1075 | 20.23  | 18.02 | 18.15 | 18.24 | 18.49 | 0.28 |
| 219.1393 | 184.29 | 16.24 | 15.75 | 15.94 | 15.70 | 0.62 |
| 219.1757 | 218.14 | 16.33 | 16.57 | 16.52 | 16.41 | 0.32 |
| 219.9536 | 34.26  | 14.99 | 16.31 | 16.29 | 16.10 | 1.04 |
| 219.9790 | 22.92  | 16.78 | 17.42 | 17.56 | 17.25 | 0.89 |
| 219.9902 | 21.85  | 14.03 | 11.29 | 14.79 | 16.13 | 0.34 |
| 220.0184 | 30.09  | 17.58 | 16.78 | 17.08 | 17.31 | 0.80 |
| 220.0281 | 76.74  | 10.53 | 14.55 | 14.45 | 15.32 | 1.58 |
| 220.0332 | 21.43  | 17.13 | 18.73 | 18.47 | 18.43 | 1.89 |
| 220.0501 | 18.24  | 24.02 | 24.21 | 24.14 | 23.96 | 0.19 |
| 220.0734 | 207.24 | 16.48 | 13.67 | 14.03 | 14.48 | 1.45 |
| 220.0828 | 273.04 | 20.92 | 20.68 | 20.42 | 20.82 | 0.34 |
| 220.0925 | 175.86 | 13.84 | 13.62 | 15.05 | 11.17 | 0.01 |
| 220.1470 | 291.2  | 16.62 | 16.90 | 16.84 | 17.08 | 0.39 |
| 220.1471 | 200.03 | 16.84 | 15.53 | 15.51 | 15.47 | 1.30 |
| 220.8526 | 20.06  | 15.00 | 11.92 | 11.08 | 12.53 | 1.15 |
| 220.9448 | 155.89 | 16.65 | 16.75 | 16.87 | 17.55 | 0.23 |
| 220.9659 | 37.27  | 22.16 | 23.63 | 23.44 | 23.35 | 1.61 |
| 221.0124 | 288.98 | 10.40 | 19.35 | 19.29 | 11.75 | 1.93 |
| 221.0215 | 31.31  | 15.78 | 15.14 | 14.66 | 15.25 | 0.72 |
| 221.0393 | 93.13  | 14.84 | 14.49 | 14.92 | 15.47 | 0.04 |
| 221.0484 | 23.56  | 16.13 | 16.70 | 15.76 | 16.59 | 0.11 |
| 221.0533 | 19.07  | 27.60 | 28.12 | 27.87 | 27.81 | 0.54 |
| 221.0671 | 201.82 | 18.42 | 16.96 | 16.54 | 16.92 | 1.59 |
| 221.0671 | 288.04 | 17.05 | 16.86 | 16.84 | 17.06 | 0.23 |
| 221.0772 | 184.06 | 19.09 | 18.65 | 18.29 | 18.54 | 0.47 |
| 221.0774 | 19.63  | 17.87 | 16.55 | 16.36 | 16.77 | 1.80 |
| 221.0823 | 284.52 | 18.63 | 17.57 | 17.76 | 17.65 | 1.36 |
| 221.0862 | 174.03 | 19.15 | 18.13 | 18.13 | 18.40 | 1.52 |
| 221.1185 | 292.09 | 17.33 | 17.19 | 17.28 | 17.21 | 0.18 |
| 221.1548 | 286.23 | 18.00 | 18.22 | 18.24 | 18.35 | 0.44 |
| 221.8908 | 93.73  | 15.46 | 14.53 | 13.87 | 14.19 | 0.70 |
| 221.9691 | 41.31  | 16.70 | 18.11 | 17.87 | 17.81 | 1.61 |
| 221.9757 | 20.52  | 19.18 | 20.34 | 20.07 | 20.03 | 1.78 |
| 221.9848 | 21.4   | 22.95 | 24.72 | 24.72 | 24.41 | 1.95 |
| 222.0000 | 27.61  | 17.38 | 17.77 | 18.27 | 17.09 | 0.59 |
| 222.0307 | 27.7   | 16.54 | 14.16 | 14.86 | 15.45 | 1.26 |
| 222.0493 | 22.59  | 22.49 | 22.66 | 22.48 | 22.68 | 0.20 |
| 222.0539 | 22.26  | 16.64 | 16.70 | 16.53 | 16.33 | 0.10 |
| 222.0592 | 20.1   | 18.05 | 18.11 | 18.03 | 17.76 | 0.02 |
| 222.0771 | 21.91  | 17.49 | 17.38 | 17.42 | 17.32 | 0.15 |
| 222.0786 | 289.93 | 18.56 | 16.66 | 16.68 | 16.51 | 1.15 |
| 222.0894 | 153.8  | 16.22 | 14.75 | 15.08 | 14.86 | 1.30 |
| 222.0986 | 290.15 | 17.27 | 16.45 | 16.15 | 16.86 | 0.94 |
| 222.1139 | 143.2  | 14.54 | 12.12 | 12.08 | 13.11 | 1.42 |
| 222.1583 | 187.11 | 15.47 | 13.57 | 13.72 | 14.53 | 1.11 |
| 222.9161 | 30.74  | 16.90 | 17.49 | 17.48 | 17.57 | 0.87 |
| 222.9265 | 119    | 14.91 | 13.98 | 14.03 | 14.12 | 1.17 |
| 222.9371 | 150.22 | 15.67 | 14.30 | 13.80 | 14.71 | 1.22 |
| 222.9423 | 85.29  | 15.78 | 15.97 | 16.06 | 16.84 | 0.46 |
| 222.9615 | 44.03  | 15.84 | 16.55 | 16.56 | 16.76 | 1.43 |
| 222.9701 | 42.06  | 15.75 | 16.41 | 16.10 | 16.21 | 0.69 |
| 222.9841 | 28.87  | 16.25 | 17.34 | 17.64 | 17.31 | 1.76 |
| 222.9882 | 18.13  | 16.86 | 18.55 | 18.56 | 18.26 | 1.92 |
| 223.0201 | 192.03 | 15.75 | 14.11 | 14.54 | 14.75 | 0.91 |
| 223.0204 | 38.41  | 14.35 | 11.17 | 12.29 | 11.78 | 0.71 |
| 223.0286 | 248.85 | 18.34 | 19.21 | 19.43 | 18.72 | 0.98 |
| 223.0369 | 20.34  | 16.37 | 18.13 | 17.36 | 17.88 | 0.86 |
| 223.0503 | 21.7   | 26.06 | 26.42 | 26.41 | 26.21 | 0.49 |



|          |        |       |       |       |       |      |
|----------|--------|-------|-------|-------|-------|------|
| 223.0567 | 24.02  | 19.47 | 20.60 | 20.47 | 20.34 | 1.41 |
| 223.0738 | 281.85 | 19.77 | 17.75 | 18.03 | 17.99 | 1.98 |
| 223.0824 | 274.48 | 18.08 | 17.61 | 17.63 | 17.19 | 0.80 |
| 223.0930 | 167.8  | 20.06 | 19.08 | 19.34 | 19.40 | 0.84 |
| 223.0979 | 190.69 | 17.12 | 16.47 | 16.55 | 16.55 | 0.93 |
| 223.1090 | 164.53 | 14.20 | 17.73 | 15.39 | 13.18 | 0.95 |
| 223.1091 | 47     | 9.80  | 19.41 | 12.99 | 8.21  | 1.25 |
| 223.1341 | 290.24 | 18.04 | 17.32 | 17.44 | 17.19 | 1.02 |
| 223.1706 | 190.36 | 16.97 | 16.84 | 17.03 | 16.98 | 0.05 |
| 223.9067 | 81.4   | 16.41 | 16.31 | 16.48 | 16.24 | 0.13 |
| 223.9642 | 43.57  | 15.19 | 12.14 | 12.14 | 12.40 | 1.20 |
| 223.9736 | 42.86  | 17.67 | 18.38 | 18.33 | 17.85 | 0.62 |
| 223.9807 | 21.36  | 17.98 | 19.73 | 19.72 | 19.44 | 1.98 |
| 223.9888 | 21.32  | 16.22 | 17.70 | 17.71 | 17.43 | 1.85 |
| 223.9946 | 28.73  | 13.95 | 13.60 | 14.49 | 14.53 | 0.06 |
| 224.0155 | 33.43  | 16.13 | 15.46 | 15.75 | 15.38 | 0.68 |
| 224.0241 | 18.48  | 14.62 | 15.68 | 15.74 | 15.54 | 1.08 |
| 224.0278 | 25.92  | 14.99 | 11.46 | 12.47 | 13.82 | 1.14 |
| 224.0318 | 152.54 | 12.40 | 14.31 | 14.50 | 14.12 | 0.81 |
| 224.0565 | 22.32  | 16.77 | 16.23 | 16.26 | 16.39 | 1.07 |
| 224.0577 | 289.4  | 16.97 | 16.17 | 15.92 | 15.39 | 0.78 |
| 224.0691 | 290.18 | 16.50 | 15.64 | 15.68 | 15.87 | 0.52 |
| 224.0789 | 78.59  | 13.28 | 10.02 | 13.36 | 13.45 | 0.64 |
| 224.0943 | 287.07 | 19.49 | 17.49 | 17.11 | 17.58 | 2.02 |
| 224.1125 | 52.25  | 13.81 | 15.66 | 11.96 | 12.56 | 0.02 |
| 224.1377 | 138.73 | 14.78 | 11.11 | 13.84 | 13.84 | 1.57 |
| 224.1408 | 33.19  | 14.04 | 22.45 | 12.05 | 12.61 | 0.81 |
| 224.1739 | 173.96 | 11.63 | 8.29  | 12.73 | 11.77 | 0.35 |
| 224.1741 | 82.3   | 13.21 | 8.50  | 12.88 | 12.75 | 0.82 |
| 224.8954 | 164.83 | 10.36 | 18.32 | 18.65 | 17.17 | 1.95 |
| 224.9131 | 29.14  | 15.20 | 15.52 | 15.56 | 15.51 | 0.34 |
| 224.9184 | 55.77  | 13.86 | 17.93 | 11.92 | 12.56 | 0.49 |
| 224.9243 | 66.2   | 17.38 | 18.81 | 16.87 | 16.95 | 0.59 |
| 224.9482 | 104.21 | 14.08 | 14.05 | 14.77 | 14.71 | 0.25 |
| 224.9577 | 57.58  | 16.40 | 15.05 | 15.66 | 16.06 | 0.59 |
| 224.9790 | 43.12  | 17.74 | 12.86 | 15.43 | 16.57 | 1.41 |
| 224.9999 | 35.53  | 19.30 | 19.28 | 20.47 | 20.15 | 0.57 |
| 225.0247 | 33.43  | 15.38 | 13.56 | 15.12 | 15.13 | 0.66 |
| 225.0254 | 144.09 | 14.75 | 12.75 | 15.80 | 14.44 | 0.32 |
| 225.0538 | 32.84  | 19.50 | 19.63 | 19.53 | 19.40 | 0.10 |
| 225.0621 | 24.14  | 23.35 | 23.94 | 23.82 | 23.69 | 0.78 |
| 225.0776 | 174.16 | 15.90 | 13.67 | 14.72 | 15.00 | 1.12 |
| 225.0896 | 274.82 | 21.77 | 20.26 | 20.45 | 20.32 | 1.74 |
| 225.0997 | 22.76  | 12.05 | 13.07 | 15.37 | 15.20 | 0.61 |
| 225.1135 | 214.69 | 18.70 | 7.78  | 14.96 | 18.17 | 1.49 |
| 225.1198 | 73.17  | 12.73 | 20.35 | 11.13 | 11.15 | 0.81 |
| 225.1246 | 253.84 | 18.43 | 26.61 | 22.85 | 15.94 | 1.24 |
| 225.1439 | 28.87  | 17.57 | 18.99 | 17.08 | 17.16 | 0.59 |
| 225.1496 | 198.95 | 19.08 | 15.61 | 18.45 | 18.42 | 1.19 |
| 225.1497 | 289.43 | 17.04 | 15.05 | 16.94 | 16.70 | 0.68 |
| 225.1669 | 67.07  | 12.83 | 17.10 | 10.66 | 11.33 | 0.41 |
| 225.1862 | 268.22 | 18.76 | 17.70 | 17.44 | 17.92 | 1.40 |
| 225.2226 | 153.25 | 16.20 | 11.45 | 14.35 | 15.04 | 1.55 |
| 225.2356 | 57.43  | 15.92 | 17.36 | 15.15 | 15.37 | 0.34 |
| 225.2475 | 65.74  | 17.22 | 18.62 | 16.68 | 16.77 | 0.53 |
| 225.3237 | 67.21  | 16.02 | 17.54 | 15.26 | 15.47 | 0.43 |
| 225.3317 | 64.79  | 8.61  | 17.94 | 8.02  | 8.24  | 1.10 |
| 225.9734 | 41.65  | 15.65 | 13.21 | 14.71 | 14.31 | 0.99 |
| 225.9868 | 27.62  | 16.77 | 17.61 | 17.13 | 17.27 | 0.73 |
| 226.0029 | 32.51  | 14.27 | 13.20 | 15.30 | 14.87 | 0.03 |
| 226.0128 | 21.01  | 16.95 | 17.20 | 17.19 | 17.79 | 0.36 |
| 226.0490 | 17.97  | 13.78 | 7.75  | 10.78 | 13.13 | 1.25 |

|          |        |       |       |       |       |      |
|----------|--------|-------|-------|-------|-------|------|
| 226.0653 | 27.92  | 19.33 | 19.90 | 19.81 | 19.63 | 0.72 |
| 226.0735 | 290.15 | 18.59 | 17.11 | 17.14 | 17.23 | 1.92 |
| 226.0838 | 70.49  | 15.31 | 13.32 | 14.14 | 14.79 | 1.36 |
| 226.0844 | 290.48 | 19.13 | 17.42 | 17.49 | 17.36 | 2.02 |
| 226.0929 | 290.31 | 18.11 | 15.00 | 16.49 | 16.69 | 1.42 |
| 226.1099 | 288.49 | 18.30 | 16.70 | 16.65 | 16.91 | 1.73 |
| 226.1210 | 271.96 | 15.75 | 18.17 | 16.09 | 16.26 | 0.83 |
| 226.1279 | 257.35 | 13.98 | 18.57 | 19.91 | 9.01  | 0.68 |
| 226.1452 | 153.63 | 14.86 | 8.40  | 14.54 | 14.52 | 1.18 |
| 226.1895 | 174.09 | 17.93 | 14.85 | 16.02 | 16.38 | 1.37 |
| 226.8920 | 104.55 | 17.28 | 15.33 | 16.23 | 16.86 | 1.26 |
| 226.9111 | 42.48  | 17.07 | 16.30 | 17.49 | 16.45 | 0.26 |
| 226.9367 | 53.29  | 19.18 | 17.28 | 19.03 | 19.06 | 1.08 |
| 226.9967 | 24     | 25.85 | 25.94 | 25.98 | 26.39 | 0.29 |
| 227.0414 | 276.37 | 19.55 | 18.91 | 19.16 | 19.48 | 0.65 |
| 227.0568 | 169.9  | 15.24 | 12.20 | 13.72 | 13.60 | 0.94 |
| 227.0664 | 31.32  | 16.53 | 16.84 | 16.65 | 16.61 | 0.27 |
| 227.0685 | 291.04 | 18.21 | 16.38 | 16.88 | 15.84 | 1.08 |
| 227.0869 | 269.69 | 16.87 | 17.07 | 16.87 | 16.70 | 0.13 |
| 227.0930 | 290.11 | 16.73 | 16.11 | 16.61 | 16.54 | 0.34 |
| 227.0932 | 169.01 | 17.05 | 17.08 | 17.40 | 17.10 | 0.25 |
| 227.1051 | 281.52 | 19.94 | 17.75 | 18.06 | 18.23 | 1.91 |
| 227.1293 | 286.16 | 18.17 | 19.13 | 18.04 | 17.85 | 0.56 |
| 227.1402 | 152.61 | 15.16 | 13.84 | 13.85 | 14.85 | 1.19 |
| 227.1405 | 22.78  | 16.85 | 12.05 | 12.14 | 13.76 | 1.64 |
| 227.1654 | 268.92 | 18.11 | 17.65 | 17.51 | 17.83 | 0.83 |
| 227.2018 | 230.16 | 26.33 | 24.12 | 24.37 | 25.02 | 1.17 |
| 227.9839 | 27.55  | 13.46 | 15.31 | 14.94 | 14.80 | 1.04 |
| 228.0003 | 20.73  | 21.88 | 21.78 | 21.77 | 22.25 | 0.08 |
| 228.0340 | 20.97  | 15.14 | 16.94 | 14.05 | 14.36 | 0.30 |
| 228.0528 | 291.33 | 15.90 | 16.67 | 16.56 | 14.87 | 0.37 |
| 228.0647 | 28.17  | 21.25 | 23.71 | 23.77 | 22.83 | 2.21 |
| 228.0817 | 24.45  | 17.14 | 17.86 | 18.40 | 17.70 | 1.29 |
| 228.0891 | 286.33 | 19.22 | 17.74 | 17.99 | 17.77 | 1.81 |
| 228.0996 | 20.02  | 16.10 | 16.14 | 15.96 | 15.73 | 0.08 |
| 228.1004 | 289.46 | 17.91 | 15.87 | 16.34 | 15.73 | 1.30 |
| 228.1246 | 160.93 | 16.71 | 16.79 | 16.88 | 17.02 | 0.26 |
| 228.1323 | 179.61 | 16.26 | 17.17 | 15.84 | 15.57 | 0.23 |
| 228.1608 | 154.65 | 16.48 | 16.26 | 16.46 | 16.26 | 0.22 |
| 228.1690 | 160.46 | 16.05 | 14.89 | 14.88 | 15.54 | 1.14 |
| 228.2051 | 291.67 | 19.49 | 18.36 | 18.43 | 18.78 | 1.87 |
| 228.8481 | 93.09  | 16.18 | 16.74 | 16.92 | 16.84 | 1.16 |
| 228.9033 | 30.47  | 16.27 | 16.41 | 16.62 | 16.10 | 0.16 |
| 228.9081 | 43.04  | 15.38 | 14.12 | 15.14 | 14.18 | 0.58 |
| 228.9162 | 69.5   | 17.48 | 17.40 | 18.68 | 18.50 | 0.59 |
| 228.9762 | 70.83  | 14.18 | 12.07 | 13.62 | 15.37 | 0.58 |
| 229.0005 | 24.25  | 19.23 | 19.12 | 19.13 | 19.45 | 0.10 |
| 229.0124 | 20.19  | 22.23 | 23.64 | 23.67 | 23.50 | 1.60 |
| 229.0236 | 30.82  | 18.21 | 17.65 | 17.78 | 17.35 | 0.37 |
| 229.0488 | 22.14  | 19.01 | 19.07 | 18.96 | 18.66 | 0.05 |
| 229.0599 | 50.21  | 19.20 | 19.24 | 21.22 | 21.05 | 0.80 |
| 229.0725 | 194.17 | 17.32 | 16.90 | 16.95 | 16.44 | 0.51 |
| 229.0729 | 290.17 | 16.63 | 16.67 | 16.72 | 16.56 | 0.05 |
| 229.0842 | 289.77 | 19.65 | 17.75 | 18.13 | 17.90 | 2.10 |
| 229.0842 | 93.07  | 16.06 | 13.70 | 14.68 | 15.31 | 1.48 |
| 229.0928 | 210.25 | 15.35 | 9.28  | 9.95  | 10.32 | 1.61 |
| 229.1086 | 172.56 | 17.20 | 17.36 | 17.38 | 17.11 | 0.26 |
| 229.1446 | 287.34 | 17.39 | 17.24 | 17.19 | 17.52 | 0.22 |
| 229.1564 | 18.75  | 14.89 | 15.94 | 15.26 | 16.00 | 0.35 |
| 229.1810 | 191.97 | 18.51 | 17.25 | 17.14 | 17.88 | 1.36 |
| 229.1966 | 226.84 | 18.20 | 17.02 | 17.89 | 18.03 | 1.13 |
| 229.2057 | 208.37 | 14.26 | 14.02 | 14.13 | 14.32 | 0.08 |

|          |        |       |       |       |       |      |
|----------|--------|-------|-------|-------|-------|------|
| 229.2086 | 202.82 | 19.44 | 17.70 | 17.79 | 18.31 | 1.60 |
| 229.9816 | 32.54  | 15.77 | 17.39 | 17.60 | 16.69 | 1.80 |
| 229.9973 | 24.27  | 20.06 | 19.95 | 19.92 | 20.38 | 0.12 |
| 230.0078 | 20.54  | 18.09 | 19.89 | 19.90 | 19.54 | 1.59 |
| 230.0158 | 19.04  | 17.38 | 18.91 | 18.99 | 18.80 | 1.57 |
| 230.0571 | 45.57  | 20.07 | 20.81 | 22.42 | 21.87 | 1.14 |
| 230.0670 | 29.03  | 16.16 | 16.28 | 16.73 | 15.92 | 0.33 |
| 230.0684 | 289.72 | 17.87 | 17.30 | 17.22 | 17.02 | 1.01 |
| 230.0788 | 26.81  | 20.98 | 21.26 | 21.28 | 20.68 | 0.26 |
| 230.1049 | 289.63 | 18.39 | 16.70 | 16.57 | 16.95 | 1.88 |
| 230.1482 | 146.73 | 15.37 | 15.04 | 15.15 | 15.15 | 0.45 |
| 230.1514 | 67.34  | 14.11 | 14.32 | 15.18 | 15.31 | 0.59 |
| 230.5303 | 24.18  | 20.13 | 24.59 | 24.61 | 23.53 | 2.01 |
| 230.8456 | 95.72  | 14.42 | 14.61 | 14.69 | 14.56 | 0.21 |
| 230.9003 | 26.16  | 15.34 | 15.37 | 15.69 | 15.02 | 0.09 |
| 230.9140 | 86.87  | 14.74 | 13.97 | 15.25 | 15.14 | 0.13 |
| 230.9291 | 149.19 | 15.29 | 16.39 | 16.17 | 16.28 | 1.37 |
| 230.9590 | 147.4  | 10.67 | 13.50 | 13.92 | 14.63 | 1.17 |
| 230.9865 | 153.36 | 15.76 | 14.39 | 14.52 | 15.54 | 1.14 |
| 230.9979 | 21.84  | 18.22 | 18.27 | 18.07 | 18.73 | 0.04 |
| 231.0168 | 19.32  | 15.73 | 16.57 | 16.53 | 16.56 | 1.06 |
| 231.0311 | 19.47  | 17.77 | 21.85 | 21.78 | 20.88 | 2.02 |
| 231.0459 | 19.16  | 17.05 | 16.71 | 16.58 | 16.65 | 0.40 |
| 231.0513 | 136.46 | 15.54 | 15.78 | 15.86 | 15.41 | 0.37 |
| 231.0605 | 62.18  | 15.12 | 15.73 | 17.41 | 16.96 | 1.04 |
| 231.0821 | 30.68  | 24.91 | 25.31 | 25.34 | 24.76 | 0.44 |
| 231.0885 | 204.03 | 18.07 | 12.54 | 11.95 | 14.86 | 1.56 |
| 231.0993 | 18.38  | 15.08 | 15.57 | 15.31 | 15.83 | 0.53 |
| 231.1001 | 289.45 | 17.36 | 15.55 | 16.34 | 15.86 | 1.13 |
| 231.1086 | 208.52 | 15.09 | 9.62  | 9.76  | 10.11 | 1.81 |
| 231.1240 | 190.22 | 16.48 | 16.20 | 16.17 | 16.14 | 0.59 |
| 231.1392 | 195.51 | 16.58 | 16.21 | 15.94 | 15.96 | 0.55 |
| 231.9878 | 33.27  | 16.21 | 17.34 | 17.08 | 16.60 | 1.18 |
| 232.0056 | 59.93  | 16.79 | 14.89 | 15.05 | 15.45 | 1.31 |
| 232.0272 | 28.22  | 14.34 | 12.81 | 14.69 | 15.34 | 0.30 |
| 232.0385 | 110.12 | 17.89 | 17.24 | 17.14 | 16.82 | 0.63 |
| 232.0553 | 60.79  | 15.69 | 15.94 | 17.86 | 17.53 | 0.98 |
| 232.0595 | 25.27  | 19.82 | 18.93 | 19.19 | 19.32 | 1.09 |
| 232.0654 | 19.93  | 13.92 | 12.24 | 12.96 | 16.25 | 0.52 |
| 232.0829 | 255.23 | 20.65 | 18.99 | 18.57 | 19.14 | 1.61 |
| 232.0943 | 20.66  | 14.56 | 15.29 | 16.09 | 15.26 | 0.48 |
| 232.1201 | 200.32 | 16.11 | 14.81 | 14.58 | 14.38 | 0.98 |
| 232.6679 | 261.02 | 15.17 | 15.02 | 14.76 | 14.96 | 0.19 |
| 232.8931 | 98.39  | 14.97 | 15.50 | 15.65 | 15.69 | 0.77 |
| 232.9028 | 97.7   | 14.99 | 14.71 | 14.34 | 15.29 | 0.35 |
| 232.9447 | 164.14 | 15.45 | 18.00 | 18.27 | 19.08 | 1.64 |
| 232.9449 | 40.47  | 19.46 | 20.46 | 20.55 | 20.34 | 1.82 |
| 232.9658 | 170.99 | 19.32 | 18.02 | 17.83 | 18.53 | 1.56 |
| 232.9659 | 71.23  | 17.98 | 16.69 | 16.14 | 16.35 | 1.19 |
| 232.9758 | 207.68 | 14.74 | 7.74  | 8.17  | 9.86  | 1.91 |
| 232.9840 | 26.12  | 16.55 | 15.85 | 15.55 | 15.78 | 0.97 |
| 233.0088 | 25.28  | 15.21 | 14.08 | 14.93 | 15.58 | 0.34 |
| 233.0314 | 24.86  | 16.28 | 16.59 | 16.08 | 16.65 | 0.14 |
| 233.0630 | 25.71  | 15.75 | 14.33 | 14.83 | 15.09 | 1.01 |
| 233.0786 | 18.99  | 16.44 | 16.94 | 17.30 | 17.41 | 0.73 |
| 233.0865 | 29.38  | 18.98 | 18.85 | 18.92 | 18.63 | 0.20 |
| 233.0870 | 191.44 | 19.41 | 19.22 | 18.95 | 19.56 | 0.42 |
| 233.1041 | 177.55 | 17.22 | 16.83 | 16.85 | 16.52 | 0.74 |
| 233.1181 | 176.26 | 15.72 | 14.92 | 15.15 | 15.00 | 0.97 |
| 233.1189 | 89.68  | 15.41 | 13.60 | 14.67 | 14.88 | 1.24 |
| 233.1189 | 21.9   | 16.98 | 15.12 | 16.04 | 17.24 | 0.71 |
| 233.1548 | 290.9  | 19.06 | 19.01 | 19.05 | 19.27 | 0.01 |

|          |        |       |       |       |       |      |
|----------|--------|-------|-------|-------|-------|------|
| 234.0085 | 20.5   | 18.35 | 17.57 | 17.51 | 17.96 | 0.78 |
| 234.0261 | 19.94  | 15.36 | 16.98 | 16.55 | 17.03 | 1.28 |
| 234.0356 | 151.26 | 16.20 | 15.04 | 14.73 | 15.48 | 1.28 |
| 234.0624 | 173.15 | 17.56 | 17.18 | 17.17 | 17.63 | 0.39 |
| 234.0903 | 187.15 | 16.93 | 16.27 | 15.94 | 16.60 | 1.23 |
| 234.0986 | 253.22 | 21.99 | 19.53 | 19.44 | 19.78 | 1.56 |
| 234.1582 | 205.9  | 17.68 | 17.47 | 17.47 | 17.48 | 0.53 |
| 234.8711 | 20.11  | 16.47 | 16.05 | 16.00 | 16.86 | 0.35 |
| 234.9242 | 34.59  | 21.78 | 22.06 | 21.07 | 21.30 | 0.12 |
| 234.9607 | 103.88 | 15.71 | 15.66 | 16.35 | 16.07 | 0.36 |
| 234.9815 | 170.48 | 16.30 | 15.91 | 15.86 | 16.37 | 0.62 |
| 235.0117 | 17.35  | 19.01 | 18.51 | 18.10 | 17.85 | 0.61 |
| 235.0317 | 33.17  | 16.51 | 17.00 | 16.82 | 16.61 | 0.65 |
| 235.0401 | 20.62  | 16.42 | 16.49 | 16.42 | 16.63 | 0.11 |
| 235.0463 | 138.72 | 15.53 | 15.13 | 15.18 | 15.17 | 0.56 |
| 235.0738 | 293.75 | 17.71 | 17.16 | 16.90 | 17.13 | 1.02 |
| 235.0834 | 17.83  | 16.29 | 14.55 | 13.66 | 14.33 | 1.12 |
| 235.0929 | 263.13 | 17.49 | 16.56 | 16.67 | 16.53 | 1.27 |
| 235.0980 | 153.26 | 15.30 | 14.14 | 13.68 | 14.09 | 1.41 |
| 235.1019 | 279.03 | 18.07 | 17.06 | 17.03 | 17.30 | 1.46 |
| 235.1216 | 170.79 | 16.48 | 16.09 | 16.08 | 15.89 | 1.40 |
| 235.1343 | 190.63 | 17.61 | 17.32 | 17.27 | 17.21 | 0.60 |
| 235.1706 | 209.73 | 18.74 | 18.13 | 18.17 | 18.03 | 0.85 |
| 235.9273 | 59.93  | 17.90 | 16.46 | 17.25 | 17.11 | 1.21 |
| 236.0158 | 31.61  | 18.06 | 19.06 | 19.24 | 18.09 | 1.09 |
| 236.0217 | 23.78  | 20.26 | 20.44 | 20.58 | 20.26 | 0.30 |
| 236.0310 | 30.09  | 13.07 | 13.93 | 14.46 | 13.71 | 0.67 |
| 236.0780 | 185.37 | 17.58 | 17.61 | 17.26 | 17.93 | 0.10 |
| 236.0941 | 17.81  | 15.80 | 10.19 | 9.06  | 13.18 | 1.47 |
| 236.0956 | 172.52 | 15.98 | 15.34 | 15.52 | 15.08 | 0.75 |
| 236.0957 | 289.44 | 16.36 | 17.42 | 18.26 | 17.24 | 1.09 |
| 236.1056 | 289.78 | 19.06 | 19.09 | 19.17 | 19.43 | 0.20 |
| 236.8615 | 75.74  | 21.22 | 22.26 | 22.13 | 21.77 | 1.41 |
| 236.8664 | 24.02  | 14.74 | 15.66 | 15.23 | 15.58 | 0.47 |
| 236.9058 | 136.81 | 15.94 | 14.88 | 15.10 | 15.64 | 1.08 |
| 236.9224 | 58.13  | 18.79 | 17.19 | 17.67 | 17.55 | 1.06 |
| 236.9285 | 81.21  | 16.08 | 13.99 | 15.19 | 14.99 | 1.36 |
| 236.9399 | 39.88  | 23.00 | 23.63 | 23.80 | 23.65 | 1.63 |
| 236.9529 | 25.23  | 14.73 | 15.26 | 15.54 | 14.79 | 0.45 |
| 236.9789 | 25.52  | 15.61 | 15.41 | 15.42 | 16.01 | 0.12 |
| 236.9791 | 138.19 | 14.97 | 14.54 | 14.35 | 14.66 | 0.76 |
| 236.9998 | 33.96  | 14.25 | 14.11 | 14.72 | 14.35 | 0.08 |
| 237.0191 | 30.98  | 12.71 | 13.78 | 14.29 | 12.54 | 0.77 |
| 237.0257 | 23.35  | 18.71 | 18.71 | 18.57 | 18.97 | 0.03 |
| 237.0620 | 146.88 | 16.54 | 15.98 | 16.10 | 16.37 | 0.71 |
| 237.0790 | 130.5  | 14.36 | 11.21 | 12.59 | 13.32 | 1.48 |
| 237.0905 | 287.61 | 20.71 | 18.26 | 18.11 | 19.20 | 1.25 |
| 237.1086 | 269.47 | 18.79 | 17.51 | 17.42 | 17.45 | 1.57 |
| 237.1136 | 184.75 | 16.89 | 16.25 | 16.59 | 16.41 | 0.80 |
| 237.1499 | 169.35 | 16.90 | 15.62 | 15.79 | 15.78 | 1.17 |
| 237.1863 | 170.61 | 16.15 | 14.84 | 14.74 | 14.91 | 1.19 |
| 237.2223 | 257.76 | 17.34 | 16.61 | 16.79 | 16.66 | 0.80 |
| 237.8648 | 91.35  | 14.44 | 14.89 | 15.12 | 14.71 | 0.49 |
| 237.9433 | 42.65  | 17.22 | 17.87 | 17.98 | 17.82 | 1.63 |
| 237.9740 | 36.82  | 17.03 | 15.94 | 17.04 | 15.94 | 0.44 |
| 237.9894 | 19.24  | 17.98 | 20.52 | 20.48 | 20.17 | 1.78 |
| 238.0104 | 28.09  | 14.21 | 13.01 | 13.63 | 14.56 | 0.50 |
| 238.0186 | 35.54  | 15.37 | 12.79 | 13.20 | 14.13 | 0.91 |
| 238.0248 | 31.65  | 17.06 | 16.75 | 16.24 | 18.54 | 0.22 |
| 238.0398 | 19.2   | 13.49 | 11.66 | 15.22 | 17.20 | 0.11 |
| 238.0491 | 163.44 | 15.24 | 14.46 | 14.83 | 15.04 | 0.55 |
| 238.0736 | 290.63 | 16.99 | 16.49 | 16.12 | 15.57 | 0.61 |

|          |        |       |       |       |       |      |
|----------|--------|-------|-------|-------|-------|------|
| 238.0844 | 128.31 | 15.37 | 14.59 | 14.46 | 14.82 | 1.12 |
| 238.0848 | 291.48 | 19.50 | 17.13 | 17.02 | 17.31 | 2.19 |
| 238.0934 | 293.96 | 17.81 | 17.81 | 17.51 | 18.23 | 0.10 |
| 238.0935 | 196.94 | 17.43 | 17.92 | 17.92 | 18.54 | 0.76 |
| 238.1101 | 288.32 | 16.88 | 13.61 | 13.34 | 13.99 | 1.24 |
| 238.1301 | 55.46  | 17.01 | 15.63 | 18.23 | 18.39 | 0.02 |
| 238.8597 | 77.21  | 18.79 | 19.66 | 19.61 | 19.27 | 1.34 |
| 238.8773 | 64.26  | 21.41 | 22.34 | 22.38 | 21.97 | 1.56 |
| 238.9172 | 91.46  | 14.54 | 13.13 | 14.17 | 14.06 | 0.46 |
| 238.9214 | 145.72 | 16.19 | 15.60 | 15.88 | 16.10 | 0.57 |
| 238.9321 | 27.6   | 19.68 | 20.00 | 20.52 | 19.60 | 0.58 |
| 238.9380 | 47.49  | 18.76 | 19.41 | 19.51 | 19.35 | 1.69 |
| 238.9440 | 50.23  | 15.64 | 16.23 | 16.31 | 16.13 | 1.20 |
| 238.9580 | 36.07  | 16.25 | 15.61 | 15.61 | 15.65 | 0.57 |
| 238.9948 | 30.5   | 16.45 | 15.54 | 15.59 | 15.30 | 0.98 |
| 239.0157 | 33.63  | 16.84 | 16.52 | 16.18 | 16.61 | 0.30 |
| 239.0229 | 26.53  | 16.94 | 16.24 | 16.04 | 16.00 | 0.83 |
| 239.0315 | 26.9   | 15.16 | 15.54 | 15.52 | 16.21 | 0.36 |
| 239.0350 | 19.08  | 17.89 | 18.75 | 18.66 | 18.33 | 1.56 |
| 239.0601 | 249.48 | 18.29 | 19.08 | 19.33 | 18.71 | 0.97 |
| 239.0681 | 19.07  | 14.42 | 13.51 | 13.55 | 14.83 | 0.43 |
| 239.0688 | 206.77 | 17.00 | 13.76 | 13.97 | 14.30 | 1.69 |
| 239.0689 | 291.08 | 17.69 | 16.73 | 16.76 | 16.93 | 1.09 |
| 239.0775 | 190.23 | 19.41 | 19.92 | 19.90 | 19.28 | 0.58 |
| 239.0888 | 290.17 | 16.84 | 11.40 | 11.27 | 13.16 | 1.84 |
| 239.0928 | 154.4  | 15.47 | 14.58 | 14.96 | 14.99 | 0.71 |
| 239.0970 | 66.42  | 14.77 | 13.30 | 15.41 | 15.97 | 0.26 |
| 239.1043 | 48.08  | 14.63 | 20.02 | 13.95 | 12.95 | 0.76 |
| 239.1053 | 280.43 | 20.11 | 18.41 | 18.61 | 18.71 | 1.75 |
| 239.1156 | 26.49  | 13.98 | 15.93 | 15.82 | 15.93 | 1.05 |
| 239.1292 | 188.89 | 17.69 | 17.12 | 17.16 | 17.15 | 1.00 |
| 239.1293 | 290.86 | 16.98 | 16.32 | 16.60 | 16.60 | 0.58 |
| 239.1405 | 84.32  | 9.55  | 19.12 | 11.69 | 8.22  | 1.13 |
| 239.1655 | 187.84 | 17.62 | 17.01 | 16.98 | 17.27 | 0.79 |
| 239.2018 | 289.77 | 17.78 | 17.42 | 16.92 | 17.47 | 0.98 |
| 239.8064 | 243.15 | 16.04 | 14.91 | 15.46 | 14.96 | 0.76 |
| 239.8806 | 85.39  | 15.00 | 15.25 | 15.42 | 15.21 | 0.68 |
| 239.9116 | 128.07 | 16.95 | 16.36 | 16.04 | 17.36 | 0.63 |
| 239.9254 | 21.78  | 18.41 | 17.97 | 17.67 | 18.16 | 0.57 |
| 239.9354 | 31.25  | 14.09 | 13.84 | 14.35 | 13.35 | 0.07 |
| 240.0106 | 32.95  | 15.11 | 14.39 | 14.68 | 14.58 | 0.47 |
| 240.0213 | 23.64  | 16.64 | 14.37 | 14.76 | 16.47 | 0.88 |
| 240.0595 | 146.68 | 14.34 | 14.65 | 15.63 | 14.42 | 0.43 |
| 240.0635 | 151.93 | 14.98 | 14.54 | 14.97 | 14.47 | 0.31 |
| 240.0810 | 137.94 | 15.64 | 15.34 | 15.71 | 15.10 | 0.27 |
| 240.0894 | 293.21 | 17.85 | 16.85 | 17.03 | 17.05 | 1.28 |
| 240.1004 | 284.33 | 19.23 | 17.39 | 17.50 | 17.53 | 2.01 |
| 240.1245 | 128.61 | 15.12 | 14.12 | 14.02 | 14.22 | 1.27 |
| 240.1438 | 96.39  | 14.57 | 15.47 | 13.15 | 13.61 | 0.25 |
| 240.1692 | 30.82  | 14.23 | 14.47 | 14.40 | 14.28 | 0.10 |
| 240.2053 | 194.44 | 17.98 | 16.63 | 15.98 | 17.42 | 1.21 |
| 240.8579 | 92.76  | 14.70 | 13.92 | 14.21 | 14.35 | 0.78 |
| 240.8711 | 18.08  | 16.65 | 12.25 | 11.92 | 14.78 | 1.78 |
| 240.8753 | 74.13  | 18.93 | 19.69 | 19.81 | 19.46 | 1.47 |
| 240.8809 | 100.32 | 15.49 | 15.55 | 16.14 | 15.54 | 0.49 |
| 240.9292 | 32.61  | 17.79 | 18.13 | 18.73 | 17.65 | 0.59 |
| 240.9527 | 53.1   | 16.11 | 11.90 | 12.88 | 13.74 | 1.57 |
| 240.9737 | 48.43  | 18.18 | 18.85 | 19.46 | 19.15 | 1.21 |
| 240.9970 | 31.55  | 16.82 | 16.36 | 16.22 | 16.92 | 0.63 |
| 241.0391 | 38.76  | 15.87 | 13.25 | 13.87 | 14.49 | 1.25 |
| 241.0579 | 136.28 | 13.00 | 11.65 | 13.46 | 12.44 | 0.17 |
| 241.0600 | 23.36  | 15.10 | 18.04 | 17.93 | 17.28 | 1.63 |

|          |        |       |       |       |       |      |
|----------|--------|-------|-------|-------|-------|------|
| 241.0727 | 165.21 | 15.61 | 15.78 | 15.77 | 15.39 | 0.20 |
| 241.0841 | 22.4   | 16.46 | 15.16 | 14.75 | 15.38 | 0.85 |
| 241.0845 | 288.68 | 19.36 | 17.73 | 18.01 | 17.74 | 1.91 |
| 241.0922 | 62.85  | 18.69 | 18.96 | 20.47 | 20.38 | 0.72 |
| 241.1206 | 288.38 | 17.97 | 18.49 | 17.31 | 16.90 | 0.16 |
| 241.1448 | 292.6  | 17.81 | 17.56 | 17.48 | 17.70 | 0.57 |
| 241.1811 | 287.04 | 18.72 | 18.31 | 18.09 | 18.61 | 0.69 |
| 241.2177 | 253.28 | 24.14 | 24.44 | 23.83 | 24.28 | 0.08 |
| 241.9072 | 132.04 | 15.23 | 14.44 | 14.11 | 15.33 | 0.73 |
| 241.9223 | 25.61  | 17.72 | 17.16 | 16.86 | 17.40 | 0.68 |
| 241.9609 | 28.14  | 15.54 | 16.37 | 16.56 | 16.00 | 0.55 |
| 242.0161 | 17.64  | 15.02 | 16.43 | 16.15 | 16.10 | 1.24 |
| 242.0444 | 19.51  | 13.65 | 16.33 | 15.35 | 14.88 | 0.76 |
| 242.0673 | 174.87 | 19.77 | 18.72 | 18.87 | 19.17 | 0.98 |
| 242.0804 | 18.79  | 24.93 | 25.37 | 25.42 | 25.17 | 0.80 |
| 242.0960 | 55.59  | 12.14 | 11.82 | 15.15 | 14.37 | 0.44 |
| 242.1048 | 288    | 17.77 | 16.72 | 16.85 | 16.83 | 1.29 |
| 242.1150 | 130.99 | 14.86 | 9.19  | 14.17 | 14.71 | 1.21 |
| 242.1170 | 23.13  | 14.11 | 15.86 | 9.26  | 9.31  | 0.57 |
| 242.1232 | 26.2   | 11.18 | 21.00 | 13.77 | 9.99  | 1.35 |
| 242.1400 | 144.63 | 15.58 | 14.90 | 14.71 | 15.14 | 0.89 |
| 242.1483 | 149.76 | 15.21 | 14.94 | 14.67 | 15.15 | 0.57 |
| 242.1766 | 276.23 | 17.15 | 16.65 | 16.96 | 17.03 | 0.40 |
| 242.1845 | 151.69 | 16.83 | 16.84 | 16.42 | 16.97 | 0.18 |
| 242.2209 | 251.02 | 21.28 | 21.48 | 20.95 | 21.30 | 0.04 |
| 242.8736 | 88.34  | 15.00 | 14.47 | 14.93 | 14.97 | 0.48 |
| 242.8851 | 51.7   | 17.27 | 15.68 | 17.04 | 17.28 | 0.99 |
| 242.8963 | 93.95  | 15.49 | 14.70 | 14.99 | 15.14 | 0.82 |
| 242.9054 | 108.83 | 15.89 | 15.02 | 14.78 | 15.60 | 1.13 |
| 242.9855 | 190.58 | 16.03 | 14.94 | 14.74 | 15.06 | 0.64 |
| 242.9920 | 19.46  | 18.53 | 18.07 | 17.91 | 18.13 | 1.02 |
| 243.0116 | 28.51  | 16.13 | 17.66 | 17.04 | 16.79 | 1.09 |
| 243.0395 | 18.61  | 17.82 | 19.70 | 19.62 | 19.52 | 1.80 |
| 243.0629 | 22.09  | 22.42 | 21.75 | 22.00 | 22.15 | 0.68 |
| 243.0708 | 144.05 | 16.98 | 15.52 | 15.30 | 15.94 | 1.65 |
| 243.0796 | 180.35 | 15.65 | 15.91 | 16.02 | 15.46 | 0.63 |
| 243.0839 | 18.41  | 20.86 | 21.24 | 21.27 | 21.02 | 0.65 |
| 243.0882 | 174.83 | 16.11 | 16.14 | 16.37 | 15.72 | 0.11 |
| 243.1000 | 288.89 | 19.40 | 17.57 | 17.83 | 17.87 | 1.98 |
| 243.1240 | 172.59 | 17.79 | 17.42 | 17.51 | 17.12 | 0.58 |
| 243.1357 | 26.78  | 11.43 | 16.63 | 8.10  | 8.87  | 0.23 |
| 243.1604 | 188.53 | 19.11 | 18.22 | 18.29 | 18.58 | 1.11 |
| 243.1607 | 18.5   | 17.23 | 16.67 | 16.28 | 17.06 | 1.00 |
| 243.1969 | 287.25 | 17.46 | 17.23 | 17.17 | 17.48 | 0.30 |
| 243.1969 | 179.93 | 19.20 | 20.26 | 19.02 | 18.95 | 0.47 |
| 243.2248 | 235.56 | 17.70 | 17.34 | 17.77 | 17.73 | 0.19 |
| 243.9575 | 24.09  | 18.98 | 19.01 | 18.96 | 19.20 | 0.06 |
| 243.9673 | 21.87  | 22.03 | 22.45 | 22.57 | 22.62 | 1.00 |
| 244.0235 | 16.71  | 18.87 | 21.61 | 21.27 | 20.86 | 1.78 |
| 244.0320 | 31.69  | 15.32 | 16.82 | 16.34 | 16.95 | 0.93 |
| 244.0663 | 21.81  | 18.63 | 17.61 | 18.04 | 18.14 | 0.81 |
| 244.0728 | 82.48  | 14.68 | 12.36 | 13.65 | 15.22 | 0.87 |
| 244.0836 | 197.98 | 18.53 | 16.73 | 16.57 | 16.62 | 2.01 |
| 244.0840 | 290.1  | 17.64 | 17.05 | 17.07 | 16.93 | 0.91 |
| 244.1382 | 25.96  | 16.09 | 16.22 | 15.91 | 16.09 | 0.01 |
| 244.1638 | 141.96 | 15.17 | 14.02 | 13.68 | 14.32 | 0.95 |
| 244.2002 | 175.53 | 16.48 | 17.48 | 16.14 | 16.22 | 0.36 |
| 244.8774 | 31.39  | 15.91 | 14.73 | 15.40 | 14.50 | 0.52 |
| 244.8825 | 67.6   | 15.79 | 15.87 | 14.87 | 15.08 | 0.41 |
| 244.8981 | 29.47  | 17.63 | 18.42 | 18.68 | 18.24 | 1.19 |
| 244.9062 | 152.42 | 18.92 | 18.68 | 18.25 | 18.40 | 0.59 |
| 244.9111 | 90.47  | 14.28 | 14.44 | 14.90 | 14.79 | 0.26 |

|          |        |       |       |       |       |      |
|----------|--------|-------|-------|-------|-------|------|
| 244.9320 | 289.81 | 17.54 | 17.61 | 17.35 | 17.51 | 0.08 |
| 244.9695 | 24.08  | 15.83 | 15.99 | 15.98 | 16.24 | 0.17 |
| 244.9855 | 152.58 | 16.65 | 15.22 | 16.38 | 17.01 | 0.48 |
| 244.9891 | 19.72  | 16.34 | 14.73 | 14.76 | 15.24 | 1.05 |
| 244.9978 | 143.97 | 15.80 | 12.30 | 13.59 | 13.00 | 1.62 |
| 245.0076 | 24.84  | 17.39 | 17.51 | 17.40 | 17.94 | 0.23 |
| 245.0133 | 19.22  | 17.39 | 17.38 | 17.42 | 17.35 | 0.00 |
| 245.0439 | 21.14  | 24.25 | 24.84 | 24.68 | 24.45 | 1.04 |
| 245.0673 | 17.94  | 15.70 | 15.20 | 15.48 | 14.87 | 0.22 |
| 245.0674 | 165.58 | 15.31 | 15.18 | 16.36 | 14.85 | 0.19 |
| 245.0788 | 198.97 | 15.75 | 9.51  | 10.29 | 10.34 | 1.87 |
| 245.0979 | 32.28  | 16.58 | 14.21 | 14.61 | 14.35 | 1.14 |
| 245.1040 | 178.6  | 16.33 | 16.16 | 16.63 | 15.94 | 0.01 |
| 245.1415 | 25.37  | 17.48 | 17.56 | 16.95 | 16.58 | 0.25 |
| 245.1915 | 195.68 | 15.62 | 14.62 | 14.26 | 14.45 | 0.62 |
| 245.9549 | 38.43  | 14.88 | 14.92 | 14.90 | 14.68 | 0.00 |
| 245.9628 | 25.1   | 16.81 | 17.06 | 17.21 | 17.36 | 0.69 |
| 245.9712 | 26.06  | 14.78 | 15.05 | 15.20 | 15.36 | 0.24 |
| 246.0391 | 27.31  | 15.36 | 15.12 | 12.06 | 13.81 | 0.88 |
| 246.0490 | 23.68  | 19.94 | 20.47 | 20.29 | 20.11 | 0.88 |
| 246.0626 | 192.56 | 16.81 | 16.27 | 15.77 | 16.54 | 1.05 |
| 246.0753 | 75.15  | 14.93 | 11.52 | 13.80 | 15.38 | 0.78 |
| 246.0988 | 259.58 | 18.32 | 17.17 | 16.95 | 17.30 | 1.71 |
| 246.1425 | 257.65 | 16.29 | 15.65 | 15.94 | 16.21 | 0.48 |
| 246.8745 | 31.6   | 15.69 | 14.15 | 14.85 | 14.43 | 0.80 |
| 246.8981 | 163.97 | 16.71 | 13.25 | 11.94 | 14.79 | 1.36 |
| 246.9034 | 160.66 | 12.87 | 15.10 | 12.81 | 13.62 | 0.44 |
| 246.9299 | 86.11  | 14.47 | 14.13 | 14.26 | 14.76 | 0.11 |
| 246.9613 | 47.73  | 14.89 | 14.67 | 14.65 | 14.65 | 0.21 |
| 246.9816 | 170.1  | 16.27 | 15.89 | 15.73 | 16.72 | 0.44 |
| 246.9818 | 35.81  | 17.28 | 18.95 | 18.96 | 18.57 | 1.79 |
| 246.9927 | 19.61  | 15.18 | 13.51 | 14.09 | 14.77 | 0.73 |
| 247.0046 | 26.57  | 15.28 | 14.61 | 14.34 | 15.30 | 0.53 |
| 247.0456 | 20.82  | 18.12 | 18.08 | 17.93 | 18.00 | 0.20 |
| 247.0664 | 181.73 | 16.48 | 17.56 | 17.44 | 17.44 | 1.63 |
| 247.0839 | 166.23 | 17.41 | 16.50 | 16.44 | 16.51 | 1.14 |
| 247.0943 | 18.76  | 15.84 | 15.84 | 16.04 | 16.51 | 0.18 |
| 247.1025 | 196.06 | 16.73 | 15.73 | 16.29 | 15.19 | 0.99 |
| 247.1066 | 66.07  | 17.10 | 18.66 | 16.51 | 16.61 | 0.55 |
| 247.1192 | 188.23 | 16.42 | 16.20 | 16.18 | 16.06 | 0.46 |
| 247.1343 | 186.61 | 16.76 | 16.46 | 16.24 | 15.87 | 0.53 |
| 247.1706 | 189.65 | 16.02 | 15.45 | 16.48 | 15.92 | 0.14 |
| 247.9619 | 36.28  | 15.53 | 15.37 | 15.16 | 14.67 | 0.32 |
| 248.0242 | 17.9   | 15.60 | 16.01 | 15.49 | 16.07 | 0.21 |
| 248.0337 | 30.65  | 17.46 | 15.49 | 15.91 | 15.99 | 1.19 |
| 248.0547 | 25.06  | 18.01 | 17.11 | 17.42 | 17.49 | 1.16 |
| 248.0701 | 182.69 | 14.14 | 13.14 | 13.70 | 13.97 | 0.40 |
| 248.0724 | 26.09  | 14.39 | 14.44 | 12.67 | 13.17 | 0.34 |
| 248.0801 | 289.58 | 14.18 | 16.34 | 16.57 | 15.09 | 1.03 |
| 248.0804 | 24.97  | 18.48 | 19.76 | 18.36 | 19.48 | 0.45 |
| 248.1152 | 206.87 | 17.18 | 15.94 | 15.59 | 15.57 | 1.12 |
| 248.5825 | 23.52  | 17.22 | 17.99 | 16.72 | 17.96 | 0.21 |
| 248.9015 | 93.05  | 14.26 | 14.44 | 15.06 | 14.84 | 0.51 |
| 248.9092 | 96.56  | 14.75 | 15.21 | 15.12 | 15.04 | 0.50 |
| 248.9140 | 152.06 | 17.35 | 14.78 | 14.87 | 15.92 | 1.88 |
| 248.9190 | 51.86  | 18.67 | 18.56 | 18.91 | 18.82 | 0.07 |
| 248.9402 | 57.18  | 18.11 | 15.68 | 11.43 | 13.56 | 1.08 |
| 248.9549 | 43.77  | 11.71 | 13.72 | 14.05 | 12.46 | 1.20 |
| 248.9610 | 44.4   | 24.02 | 25.72 | 25.77 | 25.63 | 1.80 |
| 248.9792 | 25.16  | 15.69 | 14.88 | 15.70 | 16.17 | 0.27 |
| 249.0045 | 22.26  | 16.44 | 17.20 | 17.43 | 18.12 | 0.72 |
| 249.0229 | 18.73  | 24.03 | 24.81 | 24.65 | 24.45 | 0.99 |

|          |        |       |       |       |       |      |
|----------|--------|-------|-------|-------|-------|------|
| 249.0516 | 28.58  | 18.43 | 18.38 | 18.22 | 17.80 | 0.18 |
| 249.0560 | 19.49  | 15.54 | 15.18 | 15.78 | 15.65 | 0.03 |
| 249.0814 | 168.94 | 16.79 | 15.48 | 15.52 | 15.92 | 1.08 |
| 249.0897 | 290.53 | 18.62 | 15.72 | 16.46 | 16.67 | 1.84 |
| 249.0998 | 209.47 | 15.95 | 9.40  | 11.12 | 10.68 | 1.71 |
| 249.1164 | 178.69 | 15.76 | 12.10 | 14.52 | 12.22 | 1.37 |
| 249.1500 | 202.03 | 17.34 | 16.94 | 16.95 | 16.69 | 0.63 |
| 249.1865 | 174.2  | 20.12 | 17.41 | 18.51 | 18.90 | 1.80 |
| 249.1868 | 231.1  | 17.91 | 16.59 | 17.54 | 17.65 | 1.32 |
| 249.9541 | 28.5   | 17.55 | 17.87 | 17.83 | 17.49 | 0.36 |
| 249.9643 | 44.81  | 19.33 | 21.03 | 21.02 | 20.90 | 1.82 |
| 249.9799 | 18.38  | 9.08  | 16.11 | 15.39 | 14.90 | 1.71 |
| 250.0220 | 23.31  | 17.26 | 17.72 | 17.69 | 17.76 | 1.17 |
| 250.0262 | 18.85  | 18.99 | 19.69 | 19.52 | 19.34 | 0.86 |
| 250.0399 | 17.83  | 18.73 | 19.78 | 19.28 | 19.69 | 0.68 |
| 250.0764 | 19.68  | 10.98 | 8.00  | 10.25 | 16.19 | 0.31 |
| 250.0849 | 291.25 | 18.57 | 16.93 | 16.43 | 16.65 | 1.81 |
| 250.0938 | 176.72 | 17.89 | 17.01 | 16.90 | 17.19 | 1.31 |
| 250.1303 | 24.37  | 16.51 | 16.32 | 16.93 | 16.76 | 0.15 |
| 250.1452 | 211.27 | 17.60 | 18.75 | 18.41 | 18.90 | 1.56 |
| 250.1898 | 131.87 | 17.18 | 13.92 | 15.16 | 15.27 | 1.64 |
| 250.8434 | 30.6   | 14.86 | 13.66 | 13.65 | 14.40 | 0.70 |
| 250.8983 | 45.48  | 23.94 | 23.93 | 24.36 | 23.95 | 0.23 |
| 250.9111 | 143.96 | 15.22 | 11.85 | 11.61 | 13.27 | 1.50 |
| 250.9170 | 101.35 | 14.79 | 14.32 | 14.60 | 15.05 | 0.42 |
| 250.9216 | 152.91 | 15.28 | 14.85 | 14.84 | 14.94 | 0.62 |
| 250.9348 | 78.54  | 15.69 | 16.49 | 17.19 | 16.69 | 1.55 |
| 250.9383 | 73.96  | 15.08 | 9.74  | 11.24 | 13.07 | 1.47 |
| 250.9556 | 44.89  | 19.73 | 19.34 | 19.76 | 19.77 | 0.36 |
| 250.9652 | 44.38  | 17.49 | 19.32 | 19.36 | 19.25 | 1.81 |
| 250.9735 | 19.8   | 15.85 | 16.31 | 16.55 | 16.06 | 0.62 |
| 251.0187 | 22.09  | 20.20 | 20.95 | 20.76 | 20.61 | 0.93 |
| 251.0269 | 22.48  | 16.87 | 17.42 | 17.22 | 17.16 | 0.62 |
| 251.0327 | 28.24  | 16.67 | 15.76 | 16.17 | 16.00 | 1.03 |
| 251.0433 | 20.95  | 19.13 | 20.90 | 20.10 | 19.32 | 0.51 |
| 251.0710 | 286.86 | 18.21 | 13.19 | 13.18 | 14.13 | 1.79 |
| 251.0782 | 193.56 | 16.35 | 15.41 | 15.39 | 15.57 | 1.18 |
| 251.0880 | 141.97 | 16.08 | 15.24 | 15.36 | 15.57 | 1.10 |
| 251.0975 | 73.31  | 16.71 | 16.21 | 16.76 | 17.30 | 0.18 |
| 251.1054 | 282.07 | 19.65 | 17.59 | 17.79 | 17.95 | 2.08 |
| 251.1157 | 208.38 | 15.19 | 9.41  | 9.68  | 11.03 | 1.65 |
| 251.1293 | 193.15 | 16.46 | 15.67 | 15.93 | 15.86 | 1.01 |
| 251.1486 | 211.77 | 14.51 | 15.22 | 15.25 | 15.43 | 0.83 |
| 251.1657 | 169.22 | 16.27 | 15.16 | 15.50 | 15.47 | 1.13 |
| 251.2021 | 202.09 | 23.70 | 21.14 | 21.61 | 22.07 | 1.98 |
| 251.2384 | 267.77 | 16.67 | 13.90 | 14.09 | 13.33 | 0.91 |
| 251.2384 | 153.02 | 13.84 | 12.76 | 13.13 | 13.36 | 0.41 |
| 251.9511 | 29.19  | 15.69 | 15.87 | 15.68 | 15.62 | 0.11 |
| 251.9806 | 21.98  | 14.68 | 11.04 | 11.08 | 11.49 | 1.94 |
| 251.9898 | 30.01  | 18.38 | 18.02 | 18.39 | 17.83 | 0.27 |
| 251.9956 | 26.2   | 17.83 | 17.24 | 17.40 | 16.87 | 0.33 |
| 252.0237 | 24.55  | 15.71 | 17.96 | 18.30 | 17.53 | 1.98 |
| 252.0468 | 23.49  | 16.16 | 16.51 | 16.33 | 16.11 | 0.21 |
| 252.0653 | 18.71  | 14.32 | 13.15 | 13.82 | 14.13 | 0.25 |
| 252.0709 | 21.64  | 15.16 | 16.98 | 13.98 | 14.33 | 0.28 |
| 252.0911 | 165.45 | 17.25 | 16.88 | 16.99 | 16.77 | 0.75 |
| 252.1007 | 278.25 | 20.72 | 18.96 | 19.19 | 19.15 | 1.88 |
| 252.1095 | 76.43  | 14.55 | 11.27 | 13.85 | 14.65 | 0.95 |
| 252.2054 | 190.95 | 21.04 | 18.20 | 18.89 | 19.29 | 2.00 |
| 252.8966 | 62.62  | 20.75 | 20.56 | 21.33 | 21.10 | 0.27 |
| 252.9028 | 73.14  | 16.49 | 15.98 | 16.57 | 16.21 | 0.62 |
| 252.9139 | 47.81  | 23.18 | 23.43 | 23.94 | 23.73 | 1.30 |



|          |        |       |       |       |       |      |
|----------|--------|-------|-------|-------|-------|------|
| 252.9268 | 40.65  | 12.89 | 13.57 | 14.49 | 10.99 | 0.26 |
| 252.9478 | 32.42  | 16.67 | 15.20 | 15.89 | 15.14 | 1.26 |
| 252.9536 | 59.73  | 15.74 | 15.52 | 15.05 | 15.31 | 0.24 |
| 252.9716 | 225.91 | 16.36 | 14.80 | 14.36 | 15.02 | 1.11 |
| 252.9806 | 17.48  | 9.51  | 13.39 | 14.00 | 12.45 | 1.17 |
| 252.9817 | 225.96 | 14.92 | 13.16 | 13.14 | 14.00 | 0.68 |
| 253.0510 | 27.7   | 19.64 | 20.20 | 20.58 | 20.03 | 0.88 |
| 253.0643 | 34.11  | 15.89 | 16.05 | 16.05 | 15.49 | 0.12 |
| 253.0703 | 226.1  | 15.98 | 13.09 | 12.77 | 13.72 | 1.33 |
| 253.0845 | 282.56 | 18.34 | 17.00 | 16.95 | 16.80 | 1.72 |
| 253.0853 | 19.22  | 15.15 | 10.21 | 10.45 | 11.95 | 1.96 |
| 253.0931 | 283.85 | 18.16 | 18.29 | 18.54 | 17.84 | 0.37 |
| 253.1040 | 289.54 | 16.87 | 14.11 | 14.36 | 15.36 | 1.11 |
| 253.1085 | 157.72 | 16.37 | 15.92 | 16.11 | 15.75 | 0.67 |
| 253.1210 | 282.34 | 18.40 | 16.75 | 16.52 | 16.69 | 1.51 |
| 253.1448 | 160.37 | 17.27 | 16.43 | 16.72 | 16.53 | 0.76 |
| 253.1449 | 289.85 | 16.91 | 16.48 | 16.58 | 16.64 | 0.43 |
| 253.1562 | 73.72  | 15.64 | 17.18 | 14.75 | 15.01 | 0.36 |
| 253.1813 | 163.19 | 16.37 | 14.54 | 13.92 | 15.11 | 1.10 |
| 253.2107 | 212.87 | 17.45 | 16.11 | 15.81 | 16.99 | 0.78 |
| 253.2178 | 228.91 | 29.17 | 28.80 | 28.61 | 28.98 | 0.72 |
| 253.4646 | 225.86 | 16.55 | 14.89 | 15.12 | 15.17 | 1.10 |
| 253.8099 | 291.78 | 14.22 | 16.66 | 16.72 | 16.48 | 1.46 |
| 253.8999 | 76.86  | 14.81 | 12.80 | 14.35 | 14.38 | 0.94 |
| 253.9174 | 56.39  | 17.67 | 17.59 | 18.45 | 18.24 | 0.72 |
| 253.9481 | 58.9   | 16.13 | 13.18 | 14.71 | 14.85 | 1.32 |
| 254.0162 | 25.51  | 16.00 | 15.87 | 15.01 | 16.05 | 0.29 |
| 254.0263 | 32.29  | 15.57 | 14.50 | 15.01 | 15.09 | 0.82 |
| 254.0348 | 21.03  | 16.44 | 18.41 | 18.44 | 18.34 | 1.75 |
| 254.0545 | 35.28  | 16.01 | 16.22 | 16.80 | 15.78 | 0.25 |
| 254.0790 | 19.21  | 18.32 | 18.89 | 18.78 | 18.63 | 0.58 |
| 254.0798 | 290.28 | 16.85 | 16.81 | 16.66 | 16.60 | 0.17 |
| 254.1070 | 122.27 | 15.67 | 13.10 | 13.82 | 14.17 | 1.41 |
| 254.1161 | 290.1  | 18.29 | 16.88 | 16.52 | 16.77 | 1.71 |
| 254.2144 | 223.74 | 16.93 | 13.97 | 13.48 | 14.97 | 1.46 |
| 254.2208 | 228.81 | 26.74 | 26.19 | 26.21 | 26.54 | 0.81 |
| 254.8753 | 92.5   | 15.80 | 16.07 | 16.29 | 16.40 | 0.88 |
| 254.8852 | 94.96  | 14.85 | 13.09 | 13.76 | 14.47 | 1.04 |
| 254.8946 | 76.35  | 14.94 | 13.63 | 14.29 | 14.54 | 0.85 |
| 254.9062 | 37.03  | 19.56 | 19.20 | 19.86 | 19.21 | 0.11 |
| 254.9122 | 50.59  | 20.11 | 20.35 | 20.84 | 20.65 | 1.35 |
| 254.9170 | 132.01 | 16.30 | 16.24 | 16.32 | 16.32 | 0.05 |
| 254.9270 | 34.87  | 20.34 | 21.39 | 21.58 | 21.41 | 1.73 |
| 254.9323 | 65.34  | 15.34 | 12.50 | 14.55 | 15.24 | 0.95 |
| 254.9450 | 32.07  | 14.63 | 12.22 | 14.72 | 12.88 | 0.75 |
| 254.9518 | 20.37  | 17.59 | 18.21 | 18.08 | 18.11 | 0.95 |
| 254.9920 | 17.86  | 16.64 | 16.42 | 16.27 | 16.81 | 0.32 |
| 254.9947 | 258.14 | 17.66 | 16.94 | 17.01 | 17.27 | 0.84 |
| 255.0100 | 27.05  | 13.56 | 13.52 | 14.58 | 13.98 | 0.23 |
| 255.0669 | 275.68 | 18.27 | 16.82 | 17.17 | 17.17 | 1.20 |
| 255.0859 | 263.61 | 17.11 | 15.98 | 16.15 | 16.17 | 1.02 |
| 255.0880 | 159.2  | 15.10 | 15.66 | 15.62 | 14.97 | 0.40 |
| 255.1003 | 269.23 | 18.99 | 17.48 | 17.79 | 17.54 | 1.82 |
| 255.1069 | 29.46  | 15.01 | 15.05 | 13.27 | 15.62 | 0.28 |
| 255.1241 | 163.88 | 16.67 | 15.96 | 16.25 | 15.69 | 0.41 |
| 255.1793 | 257.99 | 18.50 | 17.43 | 17.66 | 17.60 | 1.07 |
| 255.1971 | 276.08 | 18.10 | 17.53 | 17.46 | 17.91 | 1.00 |
| 255.2257 | 237.76 | 23.22 | 22.33 | 22.30 | 22.61 | 1.29 |
| 255.2336 | 257.84 | 31.04 | 31.16 | 31.04 | 30.96 | 0.23 |
| 255.3672 | 258.02 | 17.66 | 16.76 | 16.85 | 16.73 | 1.44 |
| 255.3779 | 263.34 | 16.48 | 15.01 | 15.37 | 15.68 | 1.20 |
| 255.3820 | 257.9  | 18.78 | 17.36 | 17.66 | 17.65 | 1.57 |

|          |        |       |       |       |       |      |
|----------|--------|-------|-------|-------|-------|------|
| 255.4007 | 257.83 | 17.05 | 16.23 | 16.09 | 16.14 | 0.99 |
| 255.4732 | 258.06 | 18.15 | 17.06 | 17.29 | 17.26 | 1.62 |
| 255.4833 | 258.19 | 18.65 | 17.77 | 17.91 | 17.93 | 1.60 |
| 255.8995 | 26.45  | 16.73 | 14.58 | 14.09 | 15.14 | 0.94 |
| 255.9305 | 28.69  | 14.46 | 15.85 | 15.92 | 16.04 | 1.31 |
| 255.9861 | 22.07  | 15.58 | 14.72 | 15.00 | 16.02 | 0.30 |
| 256.0598 | 173.34 | 15.67 | 15.01 | 15.08 | 15.62 | 0.78 |
| 256.0603 | 22.9   | 19.43 | 18.54 | 18.62 | 19.31 | 1.04 |
| 256.0780 | 18.89  | 14.23 | 14.56 | 14.98 | 15.61 | 0.32 |
| 256.0830 | 267.07 | 17.95 | 16.53 | 16.65 | 16.85 | 1.68 |
| 256.0948 | 18.74  | 16.36 | 17.00 | 17.22 | 17.51 | 0.73 |
| 256.0954 | 289.72 | 17.28 | 16.44 | 16.77 | 16.70 | 0.81 |
| 256.1072 | 64.03  | 17.10 | 18.43 | 16.55 | 16.65 | 0.51 |
| 256.1205 | 213.55 | 16.97 | 15.52 | 15.59 | 15.57 | 1.32 |
| 256.2002 | 157.5  | 15.90 | 14.14 | 13.53 | 15.28 | 1.14 |
| 256.2269 | 227.68 | 17.84 | 16.58 | 16.63 | 16.82 | 0.95 |
| 256.2352 | 262.62 | 28.72 | 28.48 | 28.44 | 28.53 | 0.89 |
| 256.8435 | 69.85  | 17.97 | 18.43 | 18.76 | 18.63 | 1.12 |
| 256.8547 | 99.34  | 15.29 | 14.99 | 15.42 | 14.81 | 0.27 |
| 256.8643 | 104.42 | 14.93 | 14.44 | 14.12 | 14.52 | 0.81 |
| 256.8773 | 28.2   | 11.55 | 14.13 | 14.01 | 14.79 | 1.08 |
| 256.8909 | 90.61  | 15.04 | 14.62 | 15.14 | 15.38 | 0.26 |
| 256.9036 | 35.1   | 17.89 | 17.49 | 18.26 | 17.37 | 0.12 |
| 256.9226 | 131.86 | 15.54 | 14.92 | 14.99 | 15.89 | 0.36 |
| 256.9491 | 27.84  | 18.20 | 18.34 | 18.23 | 18.50 | 0.21 |
| 256.9711 | 41.44  | 15.51 | 14.43 | 15.17 | 15.33 | 0.37 |
| 256.9912 | 30.87  | 13.52 | 12.88 | 13.86 | 13.24 | 0.13 |
| 257.0665 | 56.63  | 18.52 | 18.65 | 20.40 | 20.37 | 0.76 |
| 257.0774 | 25.87  | 17.65 | 18.41 | 18.60 | 18.63 | 1.02 |
| 257.0795 | 290.48 | 16.94 | 14.38 | 14.56 | 14.76 | 0.96 |
| 257.0976 | 165.24 | 14.07 | 14.94 | 14.83 | 15.00 | 0.84 |
| 257.1038 | 186.95 | 16.13 | 16.43 | 16.53 | 16.19 | 0.48 |
| 257.1137 | 43.98  | 9.09  | 14.56 | 15.10 | 13.16 | 1.38 |
| 257.1157 | 289.16 | 17.92 | 16.54 | 16.68 | 16.67 | 1.49 |
| 257.1397 | 185.72 | 17.43 | 16.87 | 16.91 | 16.90 | 1.02 |
| 257.1510 | 161.24 | 14.17 | 15.33 | 14.35 | 14.30 | 0.49 |
| 257.1761 | 287.81 | 17.46 | 18.08 | 18.05 | 17.72 | 0.95 |
| 257.1768 | 25.04  | 17.16 | 16.97 | 17.16 | 17.08 | 0.15 |
| 257.2127 | 201.36 | 18.22 | 17.49 | 17.15 | 17.83 | 1.10 |
| 257.2278 | 208.41 | 20.65 | 19.99 | 20.16 | 20.13 | 0.74 |
| 257.2391 | 258.12 | 25.09 | 24.54 | 24.68 | 24.74 | 1.29 |
| 257.9756 | 238.25 | 17.07 | 16.44 | 16.77 | 17.09 | 0.66 |
| 258.0394 | 19.19  | 16.34 | 16.59 | 16.49 | 16.64 | 0.21 |
| 258.0523 | 189.88 | 18.54 | 19.18 | 19.25 | 19.10 | 2.00 |
| 258.0572 | 20.23  | 17.28 | 15.90 | 15.98 | 16.72 | 1.38 |
| 258.0604 | 24     | 13.54 | 15.21 | 14.74 | 14.25 | 0.92 |
| 258.0698 | 59.32  | 13.86 | 13.79 | 15.41 | 14.94 | 0.44 |
| 258.0758 | 18.95  | 18.61 | 18.86 | 19.37 | 19.36 | 0.87 |
| 258.0989 | 195.64 | 18.38 | 15.84 | 15.79 | 15.53 | 1.86 |
| 258.1096 | 60.84  | 11.88 | 14.60 | 15.26 | 15.88 | 1.22 |
| 258.1115 | 210.15 | 14.23 | 7.55  | 6.81  | 7.77  | 1.88 |
| 258.1539 | 38.09  | 13.75 | 14.08 | 14.24 | 14.41 | 0.32 |
| 258.1796 | 149.83 | 15.07 | 14.27 | 13.97 | 14.67 | 0.95 |
| 258.2313 | 207.41 | 17.99 | 17.27 | 17.47 | 17.38 | 0.70 |
| 258.2314 | 98.25  | 11.91 | 8.15  | 10.93 | 11.77 | 0.74 |
| 258.2417 | 259.18 | 20.01 | 19.14 | 19.29 | 19.33 | 1.63 |
| 258.8409 | 81.06  | 16.45 | 16.62 | 17.15 | 17.00 | 0.69 |
| 258.8594 | 68.35  | 16.94 | 15.89 | 17.18 | 17.18 | 0.60 |
| 258.8706 | 91.93  | 14.71 | 15.34 | 15.93 | 15.38 | 1.30 |
| 258.8799 | 97.19  | 15.28 | 14.73 | 14.88 | 15.25 | 0.63 |
| 258.9181 | 128.17 | 17.24 | 17.03 | 17.03 | 17.89 | 0.09 |
| 258.9428 | 172.08 | 19.38 | 18.13 | 17.65 | 18.54 | 1.46 |

|          |        |       |       |       |       |      |
|----------|--------|-------|-------|-------|-------|------|
| 258.9608 | 31.16  | 13.87 | 15.11 | 15.25 | 14.82 | 0.95 |
| 258.9928 | 18.85  | 15.72 | 15.10 | 14.94 | 15.30 | 0.40 |
| 259.0082 | 29.68  | 16.27 | 15.63 | 16.27 | 16.61 | 0.36 |
| 259.0233 | 20.83  | 23.71 | 24.04 | 23.94 | 24.43 | 0.31 |
| 259.0558 | 185.66 | 14.89 | 15.20 | 15.26 | 15.18 | 0.83 |
| 259.0646 | 58.74  | 13.71 | 11.44 | 14.93 | 15.00 | 0.26 |
| 259.0831 | 165.32 | 15.61 | 15.96 | 15.90 | 15.68 | 0.55 |
| 259.0941 | 126.82 | 16.14 | 15.27 | 15.11 | 15.41 | 1.21 |
| 259.0950 | 289.36 | 16.93 | 16.02 | 16.28 | 16.17 | 0.82 |
| 259.1192 | 157.15 | 16.15 | 15.64 | 15.41 | 16.02 | 0.37 |
| 259.1572 | 38.78  | 15.28 | 15.79 | 15.14 | 14.88 | 0.14 |
| 259.2323 | 234.45 | 17.39 | 15.75 | 16.53 | 16.82 | 1.17 |
| 259.2438 | 233.22 | 21.87 | 21.12 | 21.49 | 21.76 | 0.92 |
| 259.9410 | 26.51  | 19.10 | 17.57 | 17.93 | 18.12 | 0.75 |
| 259.9716 | 25.89  | 16.36 | 18.77 | 19.01 | 18.44 | 1.95 |
| 259.9829 | 31.64  | 19.97 | 20.35 | 20.35 | 19.88 | 0.57 |
| 260.0065 | 43.97  | 15.12 | 13.02 | 12.68 | 15.74 | 0.97 |
| 260.0422 | 17.86  | 15.59 | 13.20 | 13.01 | 14.80 | 1.09 |
| 260.0781 | 202.3  | 18.54 | 17.40 | 17.28 | 17.90 | 1.66 |
| 260.0897 | 18.79  | 16.93 | 17.74 | 17.73 | 18.26 | 1.14 |
| 260.1090 | 32.44  | 17.74 | 17.65 | 17.73 | 17.40 | 0.08 |
| 260.1149 | 193.5  | 17.32 | 15.40 | 14.99 | 15.33 | 1.72 |
| 260.2468 | 238.9  | 19.25 | 18.27 | 18.73 | 19.01 | 1.08 |
| 260.8567 | 69.61  | 15.58 | 14.69 | 15.38 | 15.54 | 0.74 |
| 260.8642 | 22.19  | 14.38 | 14.63 | 13.80 | 13.75 | 0.08 |
| 260.8730 | 23.77  | 17.09 | 17.11 | 17.69 | 17.06 | 0.22 |
| 260.8802 | 143.8  | 10.38 | 19.68 | 19.54 | 18.57 | 2.04 |
| 260.8931 | 28.27  | 14.87 | 15.61 | 15.91 | 15.68 | 1.23 |
| 260.9142 | 135.9  | 15.43 | 14.32 | 14.10 | 15.05 | 1.03 |
| 260.9785 | 28.67  | 15.71 | 13.46 | 13.34 | 14.81 | 1.25 |
| 260.9863 | 32.17  | 14.51 | 13.99 | 14.07 | 13.77 | 0.26 |
| 261.0422 | 22.05  | 17.80 | 17.39 | 17.09 | 17.36 | 0.86 |
| 261.0737 | 17.89  | 16.11 | 17.36 | 17.38 | 17.50 | 1.29 |
| 261.0820 | 191.26 | 14.52 | 11.73 | 12.22 | 11.07 | 0.94 |
| 261.0930 | 27.57  | 16.07 | 15.46 | 15.33 | 15.59 | 1.02 |
| 261.0989 | 161.96 | 15.73 | 15.16 | 15.62 | 15.31 | 0.54 |
| 261.1115 | 203.95 | 14.82 | 8.32  | 8.20  | 8.42  | 1.96 |
| 261.1348 | 144.98 | 16.18 | 16.27 | 16.22 | 16.05 | 0.07 |
| 261.1503 | 207.63 | 16.29 | 14.45 | 15.09 | 14.62 | 1.01 |
| 261.1865 | 40.02  | 16.20 | 14.10 | 14.82 | 16.34 | 0.82 |
| 261.2229 | 225.92 | 16.76 | 16.20 | 16.22 | 16.23 | 0.56 |
| 261.9789 | 32.68  | 15.21 | 14.79 | 14.77 | 14.47 | 0.61 |
| 261.9928 | 28.66  | 13.99 | 14.13 | 14.17 | 13.84 | 0.08 |
| 262.0576 | 25.86  | 15.78 | 14.97 | 15.76 | 15.72 | 0.26 |
| 262.0851 | 289.8  | 17.15 | 16.37 | 15.79 | 16.11 | 0.70 |
| 262.0935 | 286.62 | 19.40 | 18.83 | 18.90 | 18.85 | 0.71 |
| 262.0939 | 32.39  | 19.19 | 19.71 | 19.52 | 19.75 | 0.60 |
| 262.1031 | 178.77 | 17.00 | 15.83 | 15.77 | 16.03 | 1.60 |
| 262.8697 | 31.57  | 15.06 | 14.68 | 15.12 | 14.69 | 0.20 |
| 262.8723 | 154.64 | 16.86 | 16.77 | 16.47 | 16.67 | 0.30 |
| 262.8780 | 77.13  | 17.42 | 18.39 | 18.75 | 18.39 | 1.79 |
| 262.9041 | 81.41  | 16.00 | 16.18 | 16.97 | 17.02 | 1.01 |
| 262.9349 | 88.24  | 15.10 | 11.35 | 11.07 | 13.00 | 1.98 |
| 262.9556 | 167.2  | 14.73 | 15.63 | 15.77 | 15.86 | 1.10 |
| 262.9558 | 56.02  | 17.78 | 19.00 | 19.14 | 18.95 | 1.61 |
| 262.9767 | 46.05  | 21.57 | 22.37 | 22.34 | 22.44 | 1.08 |
| 263.0413 | 24.83  | 20.71 | 20.81 | 21.19 | 20.91 | 0.28 |
| 263.0810 | 66.56  | 9.78  | 20.23 | 6.28  | 6.39  | 0.60 |
| 263.0972 | 162.53 | 17.33 | 16.66 | 16.72 | 16.84 | 0.86 |
| 263.1047 | 20.24  | 10.00 | 7.53  | 5.90  | 7.03  | 1.10 |
| 263.1055 | 291.76 | 17.96 | 17.16 | 17.06 | 16.84 | 0.92 |
| 263.1151 | 183.3  | 15.72 | 14.10 | 14.52 | 14.59 | 1.26 |

|          |        |       |       |       |       |      |
|----------|--------|-------|-------|-------|-------|------|
| 263.1294 | 161.79 | 16.44 | 15.15 | 15.38 | 15.19 | 1.18 |
| 263.1657 | 177.46 | 16.07 | 15.53 | 15.43 | 15.36 | 0.73 |
| 263.2021 | 186.45 | 16.56 | 14.45 | 14.06 | 15.05 | 1.41 |
| 263.2384 | 253.76 | 17.63 | 16.39 | 16.41 | 16.86 | 0.61 |
| 263.9801 | 39.79  | 16.90 | 17.43 | 17.51 | 17.66 | 0.84 |
| 264.0449 | 30.07  | 16.96 | 16.98 | 17.38 | 17.10 | 0.19 |
| 264.0589 | 21.88  | 15.76 | 16.59 | 16.97 | 16.61 | 1.11 |
| 264.0845 | 72.25  | 14.49 | 15.62 | 13.02 | 13.50 | 0.14 |
| 264.1005 | 289.54 | 20.10 | 17.60 | 17.96 | 18.01 | 2.21 |
| 264.1012 | 62.09  | 16.12 | 10.69 | 14.68 | 15.60 | 1.38 |
| 264.1092 | 289.77 | 17.17 | 16.81 | 16.53 | 16.91 | 0.67 |
| 264.1094 | 191.73 | 17.21 | 16.32 | 16.10 | 16.26 | 1.01 |
| 264.1612 | 226.87 | 17.07 | 17.88 | 18.08 | 17.67 | 1.47 |
| 264.8377 | 258.59 | 17.32 | 15.36 | 15.46 | 16.41 | 0.91 |
| 264.8744 | 86.87  | 12.85 | 13.25 | 14.69 | 14.29 | 0.69 |
| 264.8836 | 91.63  | 13.37 | 11.43 | 14.70 | 13.32 | 0.20 |
| 264.8879 | 158.39 | 17.02 | 16.47 | 16.50 | 17.07 | 0.53 |
| 264.8926 | 42.4   | 18.98 | 17.29 | 18.13 | 18.45 | 0.90 |
| 264.9351 | 41.25  | 24.29 | 25.54 | 25.78 | 25.62 | 1.92 |
| 264.9529 | 19.76  | 21.60 | 26.48 | 26.49 | 25.67 | 2.00 |
| 264.9823 | 38.72  | 15.10 | 14.76 | 14.37 | 14.93 | 0.32 |
| 264.9898 | 20.78  | 18.53 | 19.64 | 19.90 | 19.69 | 1.19 |
| 264.9988 | 20.61  | 17.63 | 18.93 | 19.44 | 19.16 | 1.21 |
| 265.0034 | 21.56  | 16.87 | 16.93 | 17.05 | 17.14 | 0.17 |
| 265.0216 | 26.86  | 17.31 | 18.02 | 18.02 | 18.27 | 1.13 |
| 265.0270 | 25.38  | 17.67 | 19.03 | 19.01 | 18.35 | 1.35 |
| 265.0485 | 23.87  | 16.82 | 15.90 | 16.45 | 16.15 | 0.96 |
| 265.0504 | 287    | 17.10 | 10.39 | 10.36 | 11.21 | 1.90 |
| 265.0847 | 290.56 | 16.83 | 15.96 | 16.00 | 15.57 | 0.61 |
| 265.0946 | 118.7  | 15.56 | 14.11 | 14.20 | 14.43 | 1.51 |
| 265.0948 | 21.03  | 14.63 | 12.84 | 12.90 | 13.59 | 1.34 |
| 265.0960 | 289.39 | 16.81 | 15.21 | 15.07 | 15.13 | 0.99 |
| 265.1087 | 157.91 | 15.15 | 14.35 | 14.19 | 14.35 | 0.91 |
| 265.1175 | 64.28  | 13.97 | 17.77 | 12.11 | 12.72 | 0.48 |
| 265.1212 | 288.63 | 17.86 | 16.00 | 16.67 | 16.72 | 1.12 |
| 265.1484 | 290.01 | 22.17 | 22.65 | 24.07 | 22.13 | 1.05 |
| 265.1485 | 74.02  | 21.75 | 21.06 | 20.12 | 21.73 | 0.85 |
| 265.1814 | 152.27 | 15.65 | 15.43 | 15.31 | 15.19 | 0.45 |
| 265.2178 | 222.26 | 20.98 | 20.37 | 20.47 | 20.82 | 1.01 |
| 265.9282 | 29.31  | 16.60 | 14.91 | 14.74 | 14.86 | 0.93 |
| 265.9384 | 41.45  | 19.55 | 20.79 | 21.00 | 20.85 | 1.89 |
| 265.9561 | 17.17  | 16.26 | 21.33 | 21.26 | 20.38 | 1.98 |
| 265.9946 | 19.61  | 15.70 | 15.10 | 15.11 | 14.78 | 0.52 |
| 266.0056 | 22.61  | 17.53 | 18.28 | 17.79 | 18.22 | 0.91 |
| 266.0265 | 30.04  | 13.61 | 13.62 | 13.76 | 13.86 | 0.05 |
| 266.0378 | 32.55  | 15.72 | 16.14 | 16.06 | 16.15 | 0.66 |
| 266.0630 | 32.21  | 17.06 | 16.04 | 16.08 | 16.11 | 1.21 |
| 266.0766 | 30.89  | 14.12 | 15.87 | 15.99 | 15.80 | 1.45 |
| 266.0901 | 29.63  | 19.30 | 20.50 | 20.43 | 19.93 | 1.22 |
| 266.1055 | 163.13 | 15.07 | 14.36 | 14.18 | 14.43 | 0.92 |
| 266.1162 | 281.47 | 20.11 | 17.82 | 18.09 | 18.21 | 2.06 |
| 266.1516 | 287.29 | 18.13 | 18.62 | 20.41 | 18.22 | 1.04 |
| 266.1519 | 77.16  | 18.54 | 17.50 | 16.91 | 18.56 | 0.78 |
| 266.2209 | 218.42 | 18.14 | 17.26 | 17.46 | 17.88 | 1.12 |
| 266.8725 | 54.42  | 22.85 | 23.30 | 23.72 | 23.44 | 1.35 |
| 266.8805 | 28.72  | 13.38 | 13.82 | 14.04 | 13.18 | 0.18 |
| 266.8868 | 120.65 | 15.07 | 12.92 | 11.82 | 13.58 | 1.32 |
| 266.9113 | 87.34  | 16.45 | 15.14 | 15.51 | 15.81 | 1.40 |
| 266.9322 | 43.19  | 20.19 | 21.47 | 21.62 | 21.50 | 1.83 |
| 266.9392 | 47.82  | 17.61 | 18.85 | 19.09 | 18.95 | 1.93 |
| 266.9687 | 20.06  | 17.68 | 20.01 | 20.10 | 20.29 | 1.33 |
| 266.9854 | 20.33  | 15.10 | 15.44 | 16.13 | 15.63 | 0.49 |

|          |        |       |       |       |       |      |
|----------|--------|-------|-------|-------|-------|------|
| 267.0013 | 21.33  | 17.47 | 17.27 | 17.42 | 17.49 | 0.13 |
| 267.0255 | 159    | 14.19 | 11.52 | 12.81 | 13.13 | 1.10 |
| 267.0661 | 289.42 | 21.89 | 17.58 | 17.88 | 18.40 | 2.11 |
| 267.0671 | 79.92  | 15.78 | 12.57 | 14.69 | 13.59 | 0.97 |
| 267.0743 | 22.07  | 25.34 | 25.05 | 25.56 | 25.62 | 0.02 |
| 267.1001 | 290.53 | 18.29 | 16.67 | 16.57 | 16.90 | 1.65 |
| 267.1118 | 289.86 | 16.54 | 12.52 | 12.82 | 14.28 | 1.30 |
| 267.1244 | 132.59 | 15.07 | 14.47 | 14.59 | 14.70 | 0.60 |
| 267.1372 | 219.58 | 15.92 | 9.54  | 9.39  | 10.15 | 2.27 |
| 267.1446 | 69.9   | 16.66 | 14.05 | 14.92 | 16.49 | 1.00 |
| 267.1606 | 191.54 | 16.77 | 15.98 | 16.36 | 16.33 | 0.84 |
| 267.1972 | 190.44 | 18.34 | 17.66 | 17.60 | 17.38 | 0.85 |
| 267.2336 | 252.38 | 24.99 | 24.64 | 24.49 | 25.03 | 0.68 |
| 267.8759 | 58.42  | 17.37 | 17.44 | 18.31 | 17.93 | 0.88 |
| 267.9365 | 47.6   | 14.87 | 16.00 | 16.18 | 16.15 | 1.53 |
| 267.9624 | 32.31  | 16.02 | 14.52 | 14.95 | 14.83 | 0.57 |
| 268.0469 | 130.36 | 16.09 | 15.30 | 15.11 | 15.60 | 1.19 |
| 268.0715 | 24.92  | 18.56 | 17.77 | 18.35 | 18.46 | 0.54 |
| 268.0776 | 23.34  | 21.94 | 21.50 | 21.99 | 22.10 | 0.16 |
| 268.0958 | 294.28 | 17.82 | 17.11 | 17.00 | 16.93 | 1.16 |
| 268.1046 | 27.21  | 14.42 | 14.43 | 14.52 | 14.58 | 0.04 |
| 268.1168 | 167.71 | 15.83 | 18.61 | 18.90 | 18.31 | 1.78 |
| 268.1319 | 289.85 | 16.97 | 16.38 | 15.94 | 15.25 | 0.44 |
| 268.2000 | 174.42 | 15.16 | 15.09 | 14.72 | 14.58 | 0.31 |
| 268.2005 | 48.61  | 14.61 | 14.04 | 14.42 | 14.42 | 0.18 |
| 268.2369 | 252.89 | 22.53 | 22.13 | 21.96 | 22.49 | 0.75 |
| 268.8438 | 240.03 | 15.96 | 14.53 | 15.38 | 16.02 | 0.55 |
| 268.8707 | 63.4   | 20.45 | 20.76 | 21.31 | 21.01 | 1.17 |
| 268.8767 | 82.19  | 15.26 | 15.21 | 15.43 | 15.27 | 0.08 |
| 268.8880 | 52.24  | 22.43 | 22.67 | 23.36 | 23.13 | 1.16 |
| 268.8962 | 25.73  | 15.19 | 15.45 | 15.54 | 14.75 | 0.18 |
| 268.9252 | 159.31 | 12.67 | 13.42 | 12.23 | 14.09 | 0.16 |
| 268.9324 | 148.17 | 15.17 | 14.97 | 15.06 | 15.15 | 0.17 |
| 268.9420 | 30.65  | 15.62 | 15.41 | 15.49 | 15.54 | 0.21 |
| 268.9747 | 18.53  | 15.77 | 17.61 | 17.42 | 17.06 | 1.16 |
| 268.9843 | 19.61  | 16.51 | 18.63 | 18.62 | 18.47 | 1.44 |
| 269.0459 | 41.75  | 15.44 | 15.07 | 16.05 | 14.95 | 0.00 |
| 269.0540 | 39.98  | 11.84 | 13.13 | 11.87 | 14.02 | 0.25 |
| 269.0788 | 24.03  | 17.86 | 16.83 | 17.47 | 17.63 | 0.68 |
| 269.0799 | 214.58 | 14.38 | 8.82  | 8.92  | 9.47  | 1.72 |
| 269.0887 | 27.5   | 21.49 | 22.29 | 22.09 | 21.84 | 0.72 |
| 269.1036 | 152.65 | 15.16 | 14.70 | 15.37 | 14.91 | 0.19 |
| 269.1161 | 289.29 | 17.53 | 15.44 | 16.32 | 15.47 | 0.99 |
| 269.1222 | 31.11  | 16.21 | 17.75 | 16.36 | 17.47 | 0.62 |
| 269.1400 | 185.69 | 16.63 | 16.51 | 16.62 | 16.43 | 0.17 |
| 269.2126 | 269.39 | 22.22 | 22.72 | 22.83 | 22.52 | 0.56 |
| 269.2402 | 247.81 | 18.41 | 17.69 | 17.49 | 18.11 | 1.05 |
| 269.2490 | 277.45 | 25.42 | 24.92 | 25.04 | 25.47 | 0.81 |
| 269.8740 | 75.72  | 14.93 | 13.97 | 14.94 | 14.61 | 0.64 |
| 269.8915 | 60.51  | 16.92 | 16.50 | 17.92 | 17.60 | 0.37 |
| 270.0496 | 70.76  | 13.48 | 14.36 | 15.46 | 15.83 | 0.83 |
| 270.0625 | 132.93 | 15.82 | 14.04 | 14.32 | 15.06 | 1.32 |
| 270.0754 | 171    | 13.50 | 12.99 | 13.17 | 13.58 | 0.18 |
| 270.0756 | 19.89  | 15.16 | 16.70 | 16.30 | 16.54 | 1.17 |
| 270.0921 | 28.06  | 17.70 | 18.50 | 18.23 | 17.98 | 0.62 |
| 270.0996 | 207.33 | 17.55 | 15.64 | 15.62 | 16.24 | 1.56 |
| 270.1110 | 293.59 | 17.45 | 17.08 | 17.06 | 17.14 | 0.61 |
| 270.2082 | 149.96 | 15.25 | 14.54 | 14.35 | 14.62 | 1.02 |
| 270.2083 | 23.04  | 14.12 | 12.91 | 11.88 | 14.13 | 0.75 |
| 270.2160 | 234.16 | 19.36 | 18.93 | 19.11 | 18.98 | 0.46 |
| 270.2523 | 278.95 | 22.96 | 22.42 | 22.50 | 22.90 | 0.85 |
| 270.8493 | 80.13  | 15.65 | 16.83 | 17.04 | 16.97 | 1.62 |

|          |        |       |       |       |       |      |
|----------|--------|-------|-------|-------|-------|------|
| 270.8688 | 73.84  | 16.06 | 15.50 | 16.53 | 16.19 | 0.15 |
| 270.8803 | 45.99  | 19.17 | 18.03 | 18.93 | 18.51 | 0.77 |
| 270.8863 | 52.16  | 20.01 | 20.17 | 20.93 | 20.67 | 1.05 |
| 270.8921 | 50.71  | 17.54 | 18.51 | 18.93 | 18.62 | 1.37 |
| 270.9011 | 37.01  | 20.77 | 21.14 | 21.47 | 21.45 | 0.92 |
| 270.9431 | 164.56 | 16.60 | 13.41 | 12.70 | 14.33 | 1.69 |
| 270.9871 | 23.59  | 17.46 | 19.33 | 19.29 | 19.50 | 1.50 |
| 271.0053 | 24.94  | 24.54 | 24.20 | 24.34 | 24.24 | 0.58 |
| 271.0595 | 17.01  | 19.45 | 18.69 | 18.43 | 18.19 | 0.88 |
| 271.0706 | 23.8   | 18.57 | 17.85 | 18.08 | 18.26 | 0.94 |
| 271.0951 | 289.69 | 16.90 | 12.49 | 13.77 | 13.40 | 1.27 |
| 271.0954 | 214.83 | 16.73 | 8.99  | 9.55  | 10.14 | 1.92 |
| 271.1056 | 17.17  | 15.08 | 13.59 | 15.23 | 15.12 | 0.34 |
| 271.1190 | 174.28 | 16.08 | 15.77 | 16.16 | 15.84 | 0.15 |
| 271.1557 | 176.43 | 16.95 | 16.56 | 16.80 | 16.41 | 0.56 |
| 271.1922 | 18.28  | 16.58 | 15.67 | 16.08 | 16.02 | 0.94 |
| 271.2077 | 25.63  | 16.69 | 13.97 | 15.41 | 16.98 | 0.77 |
| 271.2197 | 180.74 | 16.01 | 15.28 | 15.09 | 15.61 | 1.05 |
| 271.2283 | 209.59 | 21.94 | 21.68 | 20.78 | 20.74 | 0.89 |
| 271.2558 | 278.71 | 18.68 | 17.76 | 17.87 | 18.44 | 1.15 |
| 271.8895 | 65.66  | 14.62 | 12.38 | 14.32 | 14.66 | 0.95 |
| 272.0016 | 17.78  | 18.97 | 19.18 | 19.25 | 19.63 | 0.32 |
| 272.0083 | 24.68  | 19.96 | 19.56 | 19.68 | 19.62 | 0.74 |
| 272.0551 | 20.95  | 16.42 | 16.81 | 16.67 | 16.61 | 0.57 |
| 272.0650 | 20.84  | 15.81 | 16.14 | 16.27 | 16.12 | 0.37 |
| 272.0783 | 148.67 | 16.64 | 14.93 | 14.74 | 15.53 | 1.48 |
| 272.1162 | 214.98 | 15.42 | 7.80  | 7.85  | 8.65  | 2.14 |
| 272.1259 | 290.06 | 15.41 | 14.20 | 14.54 | 15.96 | 0.32 |
| 272.2317 | 200.26 | 19.37 | 19.14 | 18.29 | 18.44 | 0.82 |
| 272.8385 | 96.59  | 14.96 | 14.59 | 14.96 | 15.08 | 0.28 |
| 272.8474 | 91.78  | 13.34 | 13.89 | 13.74 | 13.88 | 0.58 |
| 272.8651 | 88.72  | 14.04 | 14.83 | 15.22 | 15.37 | 0.73 |
| 272.8776 | 47.29  | 17.64 | 16.02 | 17.08 | 16.55 | 0.97 |
| 272.8841 | 34.58  | 15.72 | 14.15 | 15.95 | 15.70 | 0.58 |
| 272.8935 | 139.2  | 13.51 | 13.29 | 12.70 | 14.63 | 0.12 |
| 272.9012 | 138.4  | 21.45 | 19.90 | 19.28 | 20.26 | 1.71 |
| 272.9449 | 19.28  | 16.86 | 16.55 | 16.82 | 17.32 | 0.11 |
| 272.9586 | 152.2  | 17.81 | 15.73 | 15.34 | 16.59 | 1.57 |
| 273.0029 | 19.74  | 21.38 | 21.71 | 21.76 | 21.67 | 0.93 |
| 273.0091 | 24.35  | 17.48 | 16.75 | 17.00 | 16.92 | 1.07 |
| 273.0863 | 72.01  | 13.43 | 13.18 | 14.61 | 15.33 | 0.32 |
| 273.0932 | 22.75  | 18.88 | 19.17 | 19.24 | 18.89 | 0.37 |
| 273.0987 | 151.78 | 15.24 | 15.81 | 16.00 | 15.56 | 1.01 |
| 273.0998 | 17.62  | 14.53 | 14.19 | 14.15 | 13.95 | 0.40 |
| 273.1113 | 212.06 | 17.13 | 12.59 | 11.92 | 13.66 | 1.62 |
| 273.1114 | 33.2   | 15.57 | 10.29 | 10.19 | 11.69 | 1.63 |
| 273.1350 | 166.28 | 16.32 | 16.18 | 16.55 | 15.82 | 0.05 |
| 273.1713 | 155.41 | 15.10 | 14.35 | 14.33 | 14.46 | 0.84 |
| 273.1867 | 114.6  | 15.38 | 13.70 | 14.46 | 14.23 | 1.33 |
| 273.2078 | 200.87 | 19.40 | 18.65 | 18.80 | 19.07 | 1.01 |
| 273.2352 | 166.79 | 14.90 | 14.58 | 14.55 | 14.77 | 0.33 |
| 273.9720 | 28.82  | 14.02 | 14.42 | 14.74 | 14.88 | 0.37 |
| 273.9977 | 23.36  | 16.77 | 16.90 | 16.90 | 16.59 | 0.12 |
| 274.0056 | 21.87  | 17.03 | 17.32 | 17.32 | 17.25 | 0.65 |
| 274.0220 | 29.26  | 13.88 | 14.77 | 14.93 | 14.51 | 0.71 |
| 274.0838 | 76.44  | 14.34 | 15.24 | 16.41 | 16.63 | 1.27 |
| 274.0937 | 287.63 | 19.09 | 18.15 | 18.13 | 18.63 | 1.37 |
| 274.1055 | 18.71  | 21.23 | 21.91 | 22.00 | 21.84 | 0.97 |
| 274.1248 | 31.91  | 17.43 | 16.62 | 17.08 | 16.77 | 0.59 |
| 274.1318 | 209.78 | 15.17 | 10.22 | 10.22 | 11.76 | 1.46 |
| 274.1419 | 21.88  | 16.14 | 17.02 | 17.09 | 16.85 | 0.99 |
| 274.1781 | 27.06  | 12.97 | 13.83 | 14.20 | 13.98 | 0.67 |

|          |        |       |       |       |       |      |
|----------|--------|-------|-------|-------|-------|------|
| 274.2110 | 201.76 | 16.27 | 15.10 | 15.12 | 15.60 | 1.20 |
| 274.8447 | 92.94  | 13.57 | 14.19 | 13.96 | 13.95 | 0.59 |
| 274.8889 | 19.44  | 15.51 | 16.30 | 15.69 | 17.11 | 0.57 |
| 274.8995 | 118.56 | 16.36 | 14.58 | 14.74 | 14.94 | 1.63 |
| 274.9169 | 134.19 | 19.18 | 19.09 | 19.87 | 19.16 | 0.14 |
| 274.9559 | 27.59  | 14.80 | 15.87 | 15.99 | 15.20 | 0.72 |
| 274.9890 | 18.66  | 13.48 | 14.82 | 13.50 | 13.06 | 0.36 |
| 275.0551 | 23.29  | 17.05 | 17.10 | 17.03 | 17.15 | 0.09 |
| 275.0894 | 18.17  | 20.02 | 21.79 | 21.89 | 22.06 | 1.34 |
| 275.0970 | 155.44 | 16.94 | 15.06 | 15.32 | 15.59 | 1.64 |
| 275.1087 | 23.53  | 24.22 | 24.52 | 24.66 | 24.06 | 0.38 |
| 275.1142 | 155.06 | 14.95 | 14.02 | 14.81 | 14.26 | 0.47 |
| 275.1150 | 17.6   | 15.26 | 14.31 | 13.71 | 14.53 | 0.50 |
| 275.1505 | 144.67 | 15.05 | 12.64 | 12.87 | 13.29 | 1.37 |
| 275.1691 | 106.53 | 14.74 | 15.54 | 14.70 | 16.66 | 0.27 |
| 275.2021 | 186.49 | 23.19 | 20.41 | 20.97 | 21.28 | 2.06 |
| 275.9205 | 63.55  | 13.98 | 10.62 | 11.51 | 11.47 | 0.82 |
| 275.9568 | 35.4   | 19.04 | 18.62 | 19.00 | 18.25 | 0.25 |
| 275.9802 | 64.41  | 13.97 | 11.10 | 11.43 | 14.48 | 1.20 |
| 275.9873 | 31.25  | 16.89 | 19.04 | 19.23 | 18.34 | 2.04 |
| 275.9950 | 23.21  | 11.98 | 13.20 | 13.57 | 14.34 | 0.68 |
| 276.0078 | 28.06  | 13.95 | 14.04 | 14.43 | 13.57 | 0.14 |
| 276.0197 | 20.28  | 15.73 | 16.17 | 15.54 | 16.78 | 0.23 |
| 276.0402 | 22.48  | 17.88 | 18.35 | 18.14 | 18.80 | 0.68 |
| 276.0732 | 135.79 | 15.41 | 14.83 | 14.64 | 14.85 | 0.99 |
| 276.0860 | 25.84  | 15.95 | 15.24 | 15.68 | 15.71 | 0.33 |
| 276.0927 | 17.68  | 16.41 | 18.20 | 18.31 | 18.49 | 1.30 |
| 276.1009 | 294.14 | 18.40 | 16.86 | 16.95 | 16.84 | 1.93 |
| 276.1093 | 207.83 | 20.09 | 19.69 | 19.71 | 19.65 | 0.64 |
| 276.1120 | 23.26  | 18.29 | 19.12 | 19.26 | 18.51 | 0.76 |
| 276.1188 | 189.29 | 16.18 | 15.79 | 15.58 | 15.94 | 0.46 |
| 276.2055 | 176.34 | 20.68 | 17.78 | 18.43 | 18.70 | 2.07 |
| 276.8464 | 95.89  | 15.31 | 14.58 | 14.75 | 15.27 | 0.79 |
| 276.8543 | 76.79  | 18.98 | 19.51 | 19.54 | 19.24 | 1.07 |
| 276.8660 | 29.25  | 12.10 | 14.03 | 15.12 | 13.89 | 0.86 |
| 276.8750 | 133.88 | 18.14 | 16.13 | 16.23 | 16.82 | 1.46 |
| 276.9089 | 148.67 | 16.89 | 14.77 | 14.76 | 15.89 | 1.80 |
| 276.9092 | 27.9   | 16.77 | 17.51 | 17.81 | 16.76 | 0.62 |
| 276.9147 | 81.94  | 16.72 | 14.46 | 15.91 | 15.97 | 1.36 |
| 276.9209 | 73.41  | 15.21 | 13.42 | 14.75 | 14.64 | 0.66 |
| 276.9715 | 37.34  | 15.61 | 16.45 | 16.59 | 16.38 | 1.19 |
| 276.9924 | 46.61  | 19.05 | 18.32 | 18.53 | 18.60 | 0.49 |
| 277.0124 | 21.26  | 15.46 | 14.25 | 14.04 | 14.49 | 1.13 |
| 277.0227 | 19.58  | 16.13 | 15.81 | 15.20 | 15.68 | 0.48 |
| 277.0339 | 22.53  | 19.45 | 21.33 | 20.86 | 20.82 | 1.67 |
| 277.0599 | 22.99  | 18.64 | 18.09 | 18.29 | 18.39 | 0.64 |
| 277.0858 | 22.19  | 16.56 | 15.48 | 15.74 | 15.54 | 0.69 |
| 277.0961 | 289.92 | 17.04 | 13.48 | 12.89 | 13.60 | 1.75 |
| 277.1127 | 189.42 | 16.38 | 15.13 | 15.47 | 15.72 | 0.97 |
| 277.1130 | 24.31  | 17.83 | 18.10 | 18.10 | 17.53 | 0.24 |
| 277.1230 | 173.22 | 15.58 | 15.43 | 15.86 | 15.33 | 0.00 |
| 277.1235 | 26.65  | 18.20 | 16.08 | 16.29 | 16.52 | 1.38 |
| 277.1449 | 285.73 | 21.38 | 20.83 | 21.01 | 20.64 | 0.71 |
| 277.1452 | 20.89  | 19.62 | 20.15 | 19.15 | 19.26 | 0.03 |
| 277.1815 | 159.44 | 15.86 | 14.65 | 15.04 | 15.02 | 1.27 |
| 277.1817 | 37.8   | 16.39 | 15.27 | 16.12 | 16.50 | 0.39 |
| 277.2096 | 193.22 | 17.05 | 14.13 | 14.32 | 15.99 | 1.36 |
| 277.2179 | 222.89 | 27.72 | 26.97 | 27.17 | 27.55 | 1.03 |
| 277.8530 | 240.05 | 16.47 | 13.36 | 14.77 | 15.31 | 1.18 |
| 277.9120 | 30.25  | 14.02 | 14.62 | 15.30 | 14.79 | 0.67 |
| 277.9876 | 30.34  | 17.04 | 17.32 | 17.68 | 17.16 | 0.55 |
| 278.0374 | 22.48  | 14.80 | 16.67 | 16.20 | 16.19 | 1.39 |

|          |        |       |       |       |       |      |
|----------|--------|-------|-------|-------|-------|------|
| 278.0438 | 27.74  | 15.89 | 14.87 | 15.11 | 15.29 | 1.09 |
| 278.0559 | 23.17  | 16.94 | 15.68 | 15.93 | 16.41 | 0.91 |
| 278.0887 | 116.87 | 15.50 | 13.73 | 13.66 | 13.85 | 1.61 |
| 278.0981 | 128.57 | 15.83 | 13.97 | 13.94 | 14.00 | 1.26 |
| 278.1165 | 284.1  | 19.32 | 17.17 | 17.27 | 17.58 | 2.12 |
| 278.1483 | 294.37 | 17.78 | 17.53 | 17.45 | 17.34 | 0.56 |
| 278.2211 | 217.42 | 25.39 | 24.49 | 24.79 | 25.13 | 1.16 |
| 278.8464 | 154.41 | 12.58 | 17.01 | 17.17 | 16.21 | 1.68 |
| 278.8523 | 90.62  | 16.21 | 16.50 | 16.63 | 16.29 | 0.72 |
| 278.8593 | 25.14  | 13.28 | 14.68 | 15.08 | 15.38 | 0.82 |
| 278.9064 | 37.47  | 14.64 | 15.73 | 15.58 | 14.18 | 0.48 |
| 278.9250 | 32.62  | 17.16 | 17.96 | 18.45 | 17.18 | 0.91 |
| 278.9297 | 47.69  | 19.09 | 18.61 | 18.91 | 18.97 | 0.30 |
| 278.9506 | 42.86  | 21.87 | 22.09 | 22.34 | 22.34 | 0.63 |
| 278.9601 | 240.59 | 18.25 | 17.06 | 17.56 | 17.77 | 1.28 |
| 279.0274 | 26.03  | 18.66 | 18.18 | 18.36 | 18.38 | 0.46 |
| 279.0399 | 20.47  | 23.05 | 22.43 | 22.78 | 22.95 | 0.52 |
| 279.0481 | 62.23  | 11.81 | 12.22 | 15.34 | 16.92 | 0.59 |
| 279.0811 | 240.21 | 17.88 | 16.41 | 17.00 | 17.21 | 1.18 |
| 279.1004 | 217.68 | 14.86 | 6.83  | 6.75  | 7.89  | 1.80 |
| 279.1132 | 264.14 | 18.31 | 13.88 | 13.93 | 14.90 | 1.97 |
| 279.1637 | 136.84 | 18.22 | 15.84 | 15.43 | 18.33 | 0.84 |
| 279.1699 | 239.62 | 18.54 | 16.22 | 17.21 | 17.47 | 1.13 |
| 279.1967 | 34.53  | 21.29 | 20.30 | 20.83 | 21.77 | 0.49 |
| 279.2253 | 222.11 | 22.17 | 21.07 | 21.45 | 21.92 | 1.04 |
| 279.2336 | 245.96 | 31.05 | 31.00 | 31.08 | 31.21 | 0.02 |
| 279.3867 | 240.16 | 17.85 | 16.78 | 17.06 | 17.28 | 1.21 |
| 279.4033 | 240.37 | 18.96 | 17.31 | 17.85 | 18.24 | 1.30 |
| 279.4111 | 246.16 | 16.60 | 15.72 | 15.71 | 16.08 | 1.00 |
| 279.4250 | 240.16 | 16.83 | 15.70 | 16.09 | 16.26 | 1.02 |
| 279.5080 | 240.62 | 18.24 | 17.04 | 17.47 | 17.75 | 1.31 |
| 279.5196 | 239.71 | 18.64 | 17.75 | 18.10 | 18.32 | 1.21 |
| 279.9089 | 23.38  | 15.00 | 14.45 | 15.68 | 15.54 | 0.05 |
| 279.9540 | 48.48  | 17.08 | 17.17 | 17.47 | 17.51 | 0.42 |
| 280.0118 | 26.67  | 13.92 | 14.00 | 13.94 | 14.89 | 0.10 |
| 280.0366 | 25.21  | 17.86 | 19.90 | 19.81 | 19.54 | 1.92 |
| 280.0431 | 20.06  | 19.38 | 18.70 | 19.09 | 19.24 | 0.56 |
| 280.0957 | 290.27 | 17.48 | 16.81 | 16.66 | 16.12 | 0.78 |
| 280.1046 | 78.26  | 14.48 | 10.76 | 13.31 | 14.09 | 0.98 |
| 280.1138 | 163.2  | 19.79 | 19.12 | 19.09 | 19.16 | 1.07 |
| 280.1324 | 294.27 | 17.84 | 16.82 | 16.83 | 16.95 | 1.23 |
| 280.2000 | 34.41  | 18.55 | 17.03 | 17.94 | 18.80 | 0.54 |
| 280.2274 | 222.11 | 16.68 | 15.03 | 15.12 | 15.73 | 1.19 |
| 280.2357 | 247.55 | 28.82 | 28.53 | 28.69 | 28.93 | 0.54 |
| 280.6256 | 240.16 | 16.96 | 15.16 | 16.17 | 15.99 | 0.82 |
| 280.8430 | 108.43 | 16.27 | 15.78 | 15.82 | 16.00 | 0.59 |
| 280.8618 | 149.73 | 10.45 | 17.86 | 17.60 | 17.48 | 2.08 |
| 280.8881 | 68.99  | 18.59 | 18.40 | 19.03 | 18.89 | 0.23 |
| 280.9090 | 46.13  | 24.04 | 24.76 | 25.30 | 25.09 | 1.68 |
| 280.9217 | 26.79  | 15.25 | 16.27 | 16.63 | 15.38 | 0.83 |
| 280.9276 | 55.16  | 15.02 | 14.41 | 15.14 | 15.28 | 0.21 |
| 280.9314 | 191.99 | 12.97 | 12.30 | 13.13 | 13.34 | 0.10 |
| 280.9488 | 48.33  | 17.30 | 17.57 | 17.94 | 17.93 | 0.77 |
| 280.9570 | 39.54  | 14.68 | 14.20 | 13.59 | 14.39 | 0.43 |
| 280.9609 | 264.74 | 18.72 | 17.73 | 17.90 | 18.33 | 1.02 |
| 280.9727 | 264.99 | 18.18 | 16.14 | 16.68 | 17.68 | 1.12 |
| 280.9834 | 290.32 | 16.31 | 16.70 | 16.69 | 16.83 | 0.50 |
| 280.9898 | 32.33  | 16.34 | 16.78 | 17.74 | 18.30 | 0.99 |
| 281.0320 | 23.16  | 11.33 | 16.33 | 16.78 | 14.52 | 1.91 |
| 281.0371 | 23.38  | 21.31 | 20.74 | 21.05 | 21.23 | 0.53 |
| 281.0455 | 20.09  | 15.02 | 12.98 | 15.36 | 15.70 | 0.32 |
| 281.0529 | 27.27  | 20.38 | 20.57 | 20.67 | 20.56 | 0.29 |



|          |        |       |       |       |       |      |
|----------|--------|-------|-------|-------|-------|------|
| 281.0737 | 43.27  | 13.66 | 15.75 | 16.30 | 15.29 | 0.91 |
| 281.0767 | 270.2  | 17.05 | 16.24 | 16.82 | 16.88 | 0.39 |
| 281.0917 | 62.76  | 9.85  | 16.61 | 6.33  | 6.95  | 0.34 |
| 281.0947 | 264.79 | 17.77 | 16.31 | 17.38 | 17.42 | 0.82 |
| 281.1082 | 63.33  | 18.09 | 17.53 | 18.23 | 18.88 | 0.11 |
| 281.1297 | 174.88 | 9.64  | 13.19 | 12.55 | 14.02 | 1.06 |
| 281.1399 | 152.72 | 15.17 | 13.92 | 14.20 | 14.19 | 0.79 |
| 281.2127 | 191.14 | 16.22 | 14.42 | 14.92 | 16.31 | 0.73 |
| 281.2401 | 246.25 | 25.45 | 24.87 | 25.17 | 25.43 | 0.86 |
| 281.2492 | 264.68 | 31.36 | 31.42 | 31.34 | 31.51 | 0.14 |
| 281.4038 | 264.5  | 17.59 | 16.41 | 16.83 | 17.10 | 0.86 |
| 281.4216 | 270.32 | 16.99 | 15.72 | 16.40 | 16.75 | 0.72 |
| 281.4286 | 264.79 | 16.79 | 14.36 | 15.16 | 16.22 | 1.02 |
| 281.4425 | 264.69 | 16.81 | 14.84 | 15.35 | 16.11 | 0.82 |
| 281.5259 | 270.03 | 17.09 | 15.99 | 16.33 | 16.80 | 0.74 |
| 281.5380 | 264.51 | 18.72 | 17.70 | 17.81 | 18.41 | 1.07 |
| 281.9124 | 53.41  | 19.29 | 19.96 | 20.52 | 20.34 | 1.65 |
| 282.0287 | 26.65  | 18.12 | 16.26 | 16.72 | 17.20 | 1.50 |
| 282.0382 | 28.19  | 18.63 | 18.51 | 18.64 | 18.60 | 0.12 |
| 282.0509 | 22.74  | 18.16 | 19.74 | 19.57 | 19.17 | 1.51 |
| 282.0557 | 25.11  | 16.18 | 16.37 | 16.55 | 16.44 | 0.25 |
| 282.0702 | 48.73  | 16.21 | 18.82 | 18.46 | 17.18 | 1.70 |
| 282.0852 | 20.17  | 21.50 | 21.72 | 22.19 | 21.75 | 0.39 |
| 282.1113 | 290.56 | 18.00 | 16.62 | 16.73 | 16.89 | 1.72 |
| 282.1118 | 80.82  | 15.40 | 13.82 | 14.42 | 15.28 | 1.00 |
| 282.1563 | 76.41  | 13.75 | 12.46 | 15.65 | 15.49 | 0.18 |
| 282.2158 | 45.2   | 16.11 | 13.70 | 14.00 | 15.42 | 1.09 |
| 282.2424 | 245.45 | 20.80 | 20.08 | 20.35 | 20.62 | 1.17 |
| 282.2517 | 264.48 | 29.35 | 28.94 | 29.00 | 29.30 | 0.69 |
| 282.8543 | 45.07  | 10.84 | 10.26 | 13.53 | 10.10 | 0.18 |
| 282.8595 | 86.57  | 16.73 | 15.46 | 16.18 | 16.17 | 1.29 |
| 282.8673 | 68.36  | 19.34 | 19.96 | 20.27 | 19.96 | 1.27 |
| 282.8865 | 80.23  | 16.05 | 15.08 | 16.03 | 15.94 | 0.79 |
| 282.9071 | 46.23  | 20.96 | 21.76 | 22.29 | 22.10 | 1.71 |
| 282.9115 | 139.19 | 13.91 | 13.67 | 13.88 | 14.08 | 0.07 |
| 282.9129 | 51.68  | 17.05 | 17.65 | 18.28 | 18.06 | 1.58 |
| 282.9220 | 132.53 | 15.75 | 15.34 | 15.04 | 16.12 | 0.44 |
| 282.9581 | 20.87  | 17.41 | 19.35 | 19.25 | 18.79 | 1.23 |
| 282.9732 | 296.97 | 14.56 | 13.26 | 14.35 | 14.45 | 0.50 |
| 283.0452 | 20.36  | 14.43 | 16.94 | 15.96 | 15.91 | 1.51 |
| 283.0540 | 22.63  | 22.26 | 23.75 | 23.60 | 23.20 | 1.45 |
| 283.0693 | 28.42  | 17.79 | 15.82 | 13.94 | 16.17 | 0.89 |
| 283.0827 | 145.04 | 17.07 | 15.67 | 14.69 | 15.17 | 1.29 |
| 283.0886 | 20.63  | 17.94 | 17.82 | 18.45 | 18.06 | 0.14 |
| 283.0956 | 216.24 | 15.32 | 7.96  | 8.05  | 8.81  | 2.08 |
| 283.1043 | 25.33  | 16.08 | 17.08 | 15.00 | 14.86 | 0.04 |
| 283.1107 | 187.96 | 14.62 | 16.00 | 17.62 | 16.28 | 1.39 |
| 283.1192 | 153.05 | 15.27 | 13.32 | 14.54 | 14.26 | 0.76 |
| 283.1319 | 212.69 | 15.40 | 9.45  | 9.31  | 9.75  | 2.16 |
| 283.1375 | 38.55  | 15.77 | 17.09 | 15.97 | 17.31 | 0.53 |
| 283.1554 | 158.85 | 16.00 | 15.21 | 15.43 | 15.40 | 0.57 |
| 283.1919 | 264.64 | 17.89 | 17.38 | 17.32 | 17.40 | 0.97 |
| 283.2284 | 292.59 | 17.82 | 17.47 | 17.37 | 17.52 | 0.81 |
| 283.2438 | 226.78 | 23.95 | 22.90 | 23.62 | 23.91 | 1.11 |
| 283.2556 | 268.99 | 25.84 | 25.16 | 25.31 | 25.66 | 0.99 |
| 283.2646 | 285.47 | 27.23 | 27.32 | 27.81 | 27.52 | 0.37 |
| 283.5567 | 297.07 | 14.16 | 13.29 | 14.28 | 14.29 | 0.24 |
| 283.9105 | 53.56  | 15.84 | 16.27 | 16.92 | 16.76 | 1.33 |
| 284.0310 | 25.3   | 14.89 | 14.52 | 14.31 | 15.15 | 0.27 |
| 284.0891 | 25.32  | 14.06 | 14.34 | 14.52 | 13.61 | 0.08 |
| 284.0995 | 28.3   | 15.51 | 15.42 | 15.22 | 15.33 | 0.12 |
| 284.1145 | 189.78 | 14.80 | 13.43 | 14.33 | 12.95 | 0.61 |

|          |        |       |       |       |       |      |
|----------|--------|-------|-------|-------|-------|------|
| 284.1266 | 290.02 | 16.91 | 16.51 | 16.15 | 16.30 | 0.49 |
| 284.1951 | 187.17 | 17.14 | 16.16 | 16.29 | 16.40 | 1.18 |
| 284.2238 | 75.15  | 15.15 | 11.11 | 12.38 | 13.44 | 1.47 |
| 284.2320 | 167.12 | 16.39 | 15.23 | 15.16 | 15.85 | 1.31 |
| 284.2470 | 231.58 | 21.60 | 20.52 | 21.30 | 21.57 | 1.07 |
| 284.2576 | 265.76 | 21.15 | 20.28 | 20.47 | 20.84 | 1.14 |
| 284.2675 | 282.27 | 24.98 | 24.91 | 25.57 | 25.22 | 0.26 |
| 284.8654 | 82.07  | 16.70 | 17.27 | 17.75 | 17.34 | 1.33 |
| 284.8700 | 32.1   | 14.71 | 13.94 | 14.73 | 13.89 | 0.34 |
| 284.8851 | 61.88  | 16.46 | 16.15 | 17.09 | 17.16 | 0.30 |
| 284.9035 | 51.73  | 15.82 | 14.95 | 15.89 | 15.80 | 0.51 |
| 284.9065 | 40.66  | 16.40 | 16.40 | 17.19 | 17.00 | 0.63 |
| 284.9172 | 118.78 | 15.75 | 15.50 | 15.45 | 16.52 | 0.09 |
| 284.9586 | 167.64 | 14.10 | 13.78 | 12.20 | 13.88 | 0.37 |
| 284.9697 | 17.77  | 13.08 | 13.88 | 13.78 | 14.64 | 0.44 |
| 285.0585 | 22.55  | 15.94 | 17.16 | 17.01 | 16.75 | 1.21 |
| 285.0656 | 182.36 | 19.21 | 18.67 | 18.86 | 18.86 | 0.73 |
| 285.0738 | 17.25  | 14.81 | 15.90 | 16.36 | 16.95 | 0.86 |
| 285.0984 | 150.21 | 15.13 | 14.20 | 14.08 | 14.26 | 1.06 |
| 285.1136 | 23.07  | 20.04 | 19.86 | 20.25 | 20.21 | 0.02 |
| 285.1270 | 27.62  | 13.76 | 14.26 | 14.67 | 13.44 | 0.33 |
| 285.1348 | 186.19 | 16.38 | 16.06 | 16.40 | 15.86 | 0.35 |
| 285.1711 | 183.42 | 16.51 | 16.02 | 16.19 | 16.01 | 0.62 |
| 285.2073 | 293.81 | 17.47 | 17.43 | 17.30 | 17.61 | 0.13 |
| 285.2225 | 238.73 | 18.84 | 18.03 | 18.46 | 18.53 | 0.88 |
| 285.2439 | 179.24 | 18.03 | 17.04 | 17.20 | 17.57 | 1.03 |
| 285.2503 | 231.96 | 17.97 | 16.60 | 17.53 | 17.86 | 1.15 |
| 285.2587 | 245.32 | 19.06 | 17.99 | 18.42 | 18.31 | 1.19 |
| 285.2708 | 290.12 | 21.34 | 21.35 | 22.02 | 21.58 | 0.31 |
| 286.0240 | 38.6   | 14.66 | 16.09 | 16.40 | 15.45 | 1.40 |
| 286.0513 | 17.26  | 13.99 | 15.74 | 15.18 | 14.95 | 0.96 |
| 286.0614 | 16.78  | 17.49 | 18.65 | 18.06 | 18.13 | 1.12 |
| 286.0648 | 174.24 | 15.35 | 12.87 | 13.88 | 14.04 | 1.37 |
| 286.0820 | 23.7   | 13.74 | 15.14 | 15.59 | 14.88 | 1.27 |
| 286.0938 | 197.34 | 16.92 | 15.68 | 15.38 | 15.88 | 1.50 |
| 286.0940 | 66.3   | 15.49 | 13.36 | 14.86 | 15.52 | 1.22 |
| 286.1169 | 23.14  | 16.19 | 15.52 | 16.32 | 16.30 | 0.31 |
| 286.2110 | 147.79 | 15.48 | 14.97 | 14.90 | 14.98 | 0.77 |
| 286.2156 | 258.49 | 19.42 | 17.83 | 17.93 | 17.48 | 1.71 |
| 286.2621 | 246.18 | 16.29 | 14.75 | 15.08 | 14.86 | 0.82 |
| 286.2741 | 297.11 | 15.38 | 16.48 | 17.26 | 16.80 | 0.84 |
| 286.8542 | 53.75  | 18.25 | 16.15 | 17.87 | 17.98 | 1.20 |
| 286.8647 | 37.64  | 18.40 | 18.14 | 20.07 | 18.90 | 0.52 |
| 286.8750 | 47.45  | 20.89 | 19.70 | 19.75 | 19.62 | 1.34 |
| 286.8910 | 162.27 | 15.56 | 11.24 | 10.45 | 13.89 | 1.21 |
| 286.9169 | 150.86 | 16.93 | 16.42 | 15.93 | 16.35 | 0.78 |
| 286.9362 | 28.59  | 20.69 | 23.24 | 22.95 | 22.95 | 1.83 |
| 286.9724 | 20.8   | 16.35 | 16.61 | 16.61 | 16.47 | 0.33 |
| 286.9790 | 26.04  | 21.67 | 19.33 | 19.69 | 19.82 | 1.23 |
| 287.0093 | 25.67  | 19.60 | 21.29 | 21.54 | 20.73 | 2.02 |
| 287.0447 | 34.96  | 16.24 | 12.69 | 12.77 | 14.39 | 1.56 |
| 287.0532 | 16.75  | 18.67 | 19.63 | 19.45 | 19.11 | 0.73 |
| 287.0626 | 172.23 | 14.91 | 11.76 | 12.35 | 13.25 | 1.71 |
| 287.0894 | 23.44  | 16.33 | 14.22 | 13.31 | 14.62 | 0.91 |
| 287.0996 | 69.89  | 13.56 | 16.81 | 11.38 | 12.50 | 0.29 |
| 287.1092 | 25.06  | 15.79 | 15.01 | 15.66 | 15.68 | 0.44 |
| 287.1142 | 152.1  | 15.46 | 15.70 | 15.97 | 15.50 | 0.53 |
| 287.1270 | 210.18 | 16.01 | 9.36  | 9.83  | 10.61 | 1.83 |
| 287.1506 | 164.78 | 16.23 | 15.96 | 16.35 | 15.76 | 0.22 |
| 287.1881 | 114.49 | 14.88 | 13.86 | 12.99 | 13.56 | 0.87 |
| 287.2020 | 174.78 | 17.28 | 14.01 | 15.53 | 15.18 | 1.92 |
| 287.2234 | 216.54 | 16.72 | 17.11 | 16.58 | 16.63 | 0.14 |

|          |        |       |       |       |       |      |
|----------|--------|-------|-------|-------|-------|------|
| 287.9401 | 23.39  | 16.22 | 18.46 | 18.47 | 17.86 | 1.69 |
| 287.9825 | 25.74  | 16.64 | 13.86 | 13.79 | 14.39 | 1.16 |
| 287.9876 | 28.19  | 15.59 | 17.07 | 16.58 | 16.76 | 1.29 |
| 288.0129 | 22.19  | 13.22 | 15.44 | 15.90 | 15.03 | 1.61 |
| 288.0199 | 27.51  | 14.58 | 15.13 | 14.94 | 15.13 | 0.39 |
| 288.0567 | 19.75  | 15.19 | 15.71 | 15.13 | 14.84 | 0.10 |
| 288.0847 | 20.69  | 17.91 | 18.45 | 18.22 | 18.33 | 0.64 |
| 288.1093 | 259.56 | 18.87 | 17.14 | 17.00 | 17.47 | 1.85 |
| 288.1212 | 18.74  | 18.39 | 19.40 | 19.09 | 19.75 | 0.89 |
| 288.2056 | 183.1  | 14.58 | 11.07 | 12.14 | 11.98 | 1.72 |
| 288.7785 | 289.87 | 17.27 | 18.50 | 18.13 | 19.00 | 1.41 |
| 288.7796 | 21.7   | 10.11 | 8.53  | 7.23  | 11.62 | 0.47 |
| 288.8517 | 55.76  | 16.98 | 15.12 | 16.17 | 16.34 | 1.34 |
| 288.8636 | 74.35  | 15.39 | 14.77 | 15.48 | 14.83 | 0.34 |
| 288.8881 | 29.52  | 14.44 | 15.40 | 15.71 | 15.46 | 1.17 |
| 288.9117 | 79.69  | 14.71 | 14.16 | 14.49 | 14.46 | 0.37 |
| 288.9240 | 27.88  | 14.45 | 13.48 | 13.78 | 14.26 | 0.45 |
| 288.9536 | 39.2   | 20.98 | 22.83 | 22.56 | 22.56 | 1.61 |
| 288.9754 | 25.81  | 17.69 | 14.37 | 14.92 | 15.22 | 1.24 |
| 288.9882 | 17.95  | 15.31 | 18.59 | 18.85 | 18.32 | 1.72 |
| 288.9977 | 18.79  | 15.22 | 19.28 | 19.23 | 18.94 | 1.83 |
| 289.0081 | 21.71  | 14.73 | 16.89 | 17.52 | 16.58 | 1.75 |
| 289.0340 | 17.18  | 22.05 | 23.26 | 23.57 | 23.30 | 1.36 |
| 289.0686 | 25.31  | 20.63 | 20.24 | 20.47 | 20.58 | 0.35 |
| 289.0875 | 184    | 17.97 | 17.58 | 17.61 | 17.69 | 1.28 |
| 289.1053 | 16.94  | 13.76 | 9.12  | 9.29  | 10.30 | 1.22 |
| 289.1063 | 207.31 | 14.37 | 7.76  | 8.01  | 8.41  | 1.74 |
| 289.1132 | 186.16 | 15.12 | 10.20 | 9.60  | 10.91 | 1.92 |
| 289.1244 | 25.14  | 18.74 | 19.38 | 18.35 | 18.31 | 0.10 |
| 289.1299 | 153.03 | 15.43 | 14.89 | 15.51 | 14.97 | 0.37 |
| 289.2176 | 215.78 | 19.52 | 18.48 | 19.18 | 19.12 | 1.04 |
| 289.8787 | 91.64  | 16.42 | 15.60 | 15.91 | 15.68 | 1.29 |
| 289.9467 | 30.96  | 15.61 | 16.13 | 16.06 | 15.46 | 0.49 |
| 289.9571 | 39.35  | 16.37 | 17.76 | 17.48 | 17.50 | 1.32 |
| 289.9880 | 32.07  | 15.52 | 15.77 | 16.53 | 14.69 | 0.35 |
| 290.0204 | 17.46  | 15.44 | 13.23 | 14.54 | 14.41 | 0.80 |
| 290.0376 | 21.24  | 18.13 | 19.26 | 19.58 | 19.44 | 1.29 |
| 290.0721 | 27.68  | 17.03 | 16.20 | 16.34 | 16.64 | 0.75 |
| 290.0898 | 176.02 | 17.02 | 16.29 | 16.31 | 16.53 | 0.97 |
| 290.1004 | 18.59  | 15.01 | 15.33 | 15.36 | 15.78 | 0.40 |
| 290.1196 | 27.59  | 18.58 | 18.11 | 18.49 | 18.09 | 0.44 |
| 290.1263 | 206.57 | 15.41 | 10.26 | 10.99 | 12.18 | 1.26 |
| 290.1729 | 76.97  | 7.53  | 8.63  | 13.80 | 12.70 | 1.03 |
| 290.2132 | 186.17 | 16.04 | 15.80 | 15.53 | 15.56 | 0.31 |
| 290.2210 | 212.89 | 16.87 | 15.44 | 16.23 | 16.24 | 1.28 |
| 290.2385 | 239.81 | 16.64 | 14.76 | 15.94 | 16.19 | 0.72 |
| 290.7759 | 291.59 | 14.23 | 16.34 | 15.90 | 16.56 | 1.51 |
| 290.8910 | 50.25  | 21.65 | 20.99 | 21.65 | 20.61 | 0.23 |
| 290.9233 | 29.32  | 11.45 | 9.16  | 9.54  | 10.51 | 0.47 |
| 290.9249 | 155.31 | 15.38 | 11.43 | 10.14 | 13.77 | 1.41 |
| 290.9303 | 66.81  | 15.86 | 15.54 | 14.90 | 15.45 | 0.59 |
| 290.9493 | 42.73  | 16.77 | 18.40 | 18.50 | 18.63 | 1.85 |
| 290.9578 | 39.27  | 14.03 | 16.10 | 15.43 | 15.88 | 1.20 |
| 291.0079 | 44.98  | 16.81 | 14.98 | 15.30 | 15.78 | 0.88 |
| 291.0384 | 18.68  | 15.64 | 16.56 | 17.02 | 16.54 | 0.98 |
| 291.0782 | 17.05  | 14.99 | 16.09 | 15.72 | 15.42 | 0.70 |
| 291.0968 | 50.64  | 13.41 | 16.19 | 11.34 | 12.11 | 0.22 |
| 291.1117 | 293.9  | 18.29 | 16.82 | 16.95 | 16.60 | 1.56 |
| 291.1236 | 169.21 | 15.11 | 14.08 | 14.19 | 13.96 | 0.89 |
| 291.1455 | 142.42 | 15.36 | 14.37 | 14.31 | 14.50 | 1.22 |
| 291.1605 | 288.85 | 20.11 | 18.17 | 18.43 | 18.40 | 1.82 |
| 291.1975 | 180.78 | 16.06 | 14.76 | 14.45 | 15.55 | 1.11 |

|          |        |       |       |       |       |      |
|----------|--------|-------|-------|-------|-------|------|
| 291.2338 | 238.08 | 19.97 | 19.27 | 19.44 | 19.63 | 1.07 |
| 291.4899 | 233.11 | 15.32 | 13.60 | 14.82 | 15.49 | 0.62 |
| 291.8944 | 82.25  | 16.59 | 14.83 | 15.82 | 15.63 | 1.08 |
| 291.9613 | 51.86  | 16.29 | 17.74 | 17.97 | 17.02 | 1.42 |
| 292.0034 | 34.9   | 16.12 | 15.19 | 15.95 | 15.38 | 0.54 |
| 292.0368 | 22.06  | 20.59 | 20.81 | 21.26 | 21.07 | 0.67 |
| 292.0595 | 27.13  | 19.61 | 19.43 | 19.50 | 19.40 | 0.37 |
| 292.0733 | 20.75  | 21.95 | 22.70 | 22.63 | 22.49 | 1.16 |
| 292.0813 | 19.09  | 19.21 | 20.32 | 19.82 | 19.46 | 0.76 |
| 292.1046 | 127.7  | 16.23 | 14.35 | 14.73 | 14.97 | 1.50 |
| 292.1320 | 290.19 | 17.50 | 12.06 | 13.70 | 14.53 | 1.51 |
| 292.1641 | 160.54 | 16.67 | 12.20 | 13.25 | 13.55 | 1.75 |
| 292.8284 | 78.84  | 16.16 | 17.59 | 17.66 | 17.21 | 1.54 |
| 292.8831 | 132.5  | 16.04 | 15.95 | 16.12 | 16.59 | 0.04 |
| 292.8944 | 59.75  | 14.73 | 14.14 | 14.58 | 14.06 | 0.30 |
| 292.8995 | 149.15 | 15.83 | 14.68 | 14.51 | 15.95 | 0.93 |
| 292.9150 | 17.94  | 14.43 | 16.68 | 16.27 | 16.36 | 1.55 |
| 292.9245 | 20.94  | 17.83 | 21.07 | 21.00 | 20.66 | 1.65 |
| 292.9456 | 69.89  | 15.78 | 15.07 | 15.71 | 16.01 | 0.47 |
| 292.9665 | 48.76  | 19.24 | 18.05 | 18.50 | 18.51 | 0.69 |
| 292.9875 | 33.91  | 19.45 | 20.31 | 20.48 | 20.27 | 1.51 |
| 293.0177 | 20.06  | 15.31 | 17.17 | 15.75 | 16.24 | 0.63 |
| 293.0342 | 19.05  | 15.53 | 12.77 | 12.99 | 14.47 | 1.01 |
| 293.0430 | 25.11  | 19.06 | 19.46 | 19.25 | 19.24 | 0.50 |
| 293.0505 | 34.18  | 16.49 | 16.87 | 16.77 | 16.24 | 0.22 |
| 293.0636 | 30.62  | 15.43 | 15.52 | 15.83 | 15.45 | 0.25 |
| 293.0769 | 21.17  | 18.08 | 18.72 | 18.71 | 18.50 | 1.00 |
| 293.1143 | 34.91  | 16.15 | 25.47 | 17.76 | 16.13 | 1.39 |
| 293.1274 | 293.58 | 18.42 | 16.74 | 16.89 | 16.88 | 1.72 |
| 293.1401 | 157.9  | 15.19 | 13.22 | 14.37 | 14.60 | 1.15 |
| 293.1403 | 20.54  | 13.24 | 8.27  | 10.30 | 10.85 | 1.40 |
| 293.1773 | 273.02 | 20.19 | 20.38 | 20.22 | 19.86 | 0.08 |
| 293.2128 | 197.91 | 19.42 | 18.19 | 18.15 | 18.22 | 1.42 |
| 293.2493 | 260.47 | 21.38 | 20.88 | 21.05 | 21.31 | 0.75 |
| 293.9613 | 36.19  | 16.94 | 16.61 | 17.14 | 16.29 | 0.13 |
| 293.9748 | 30.18  | 13.96 | 14.72 | 13.92 | 13.57 | 0.26 |
| 294.0066 | 21     | 18.05 | 19.30 | 19.45 | 19.64 | 1.35 |
| 294.0300 | 19.43  | 20.91 | 20.90 | 20.75 | 21.16 | 0.05 |
| 294.0702 | 17.61  | 20.20 | 20.88 | 20.84 | 20.70 | 1.11 |
| 294.0772 | 20.57  | 15.64 | 16.32 | 16.03 | 15.84 | 0.54 |
| 294.0968 | 25.86  | 16.39 | 16.83 | 17.33 | 16.81 | 0.57 |
| 294.1112 | 289.54 | 17.49 | 15.83 | 15.73 | 14.95 | 0.92 |
| 294.1133 | 51.07  | 11.27 | 22.43 | 7.68  | 6.92  | 0.58 |
| 294.1295 | 263.02 | 18.80 | 16.93 | 17.06 | 16.84 | 1.87 |
| 294.1798 | 287.82 | 17.36 | 17.69 | 17.47 | 18.06 | 0.45 |
| 294.2160 | 180.71 | 15.74 | 15.03 | 15.14 | 15.23 | 0.95 |
| 294.2524 | 256    | 18.61 | 17.97 | 18.25 | 18.49 | 0.75 |
| 294.8197 | 64.45  | 17.82 | 18.07 | 18.30 | 18.16 | 0.80 |
| 294.8260 | 91.09  | 14.62 | 15.03 | 15.00 | 14.68 | 0.35 |
| 294.8804 | 42.06  | 14.15 | 15.39 | 15.17 | 14.03 | 0.57 |
| 294.9041 | 160.7  | 16.53 | 14.89 | 14.35 | 15.43 | 1.56 |
| 294.9105 | 28.51  | 14.24 | 13.98 | 14.68 | 14.13 | 0.02 |
| 294.9246 | 44.73  | 21.53 | 21.22 | 21.97 | 21.94 | 0.14 |
| 294.9412 | 17.69  | 13.26 | 10.66 | 14.24 | 15.26 | 0.24 |
| 294.9478 | 151.27 | 15.34 | 14.82 | 15.04 | 15.15 | 0.50 |
| 294.9645 | 42.68  | 14.84 | 14.19 | 14.88 | 14.30 | 0.17 |
| 294.9847 | 19.32  | 17.10 | 16.20 | 15.84 | 16.72 | 0.85 |
| 295.0220 | 83.21  | 13.43 | 14.49 | 15.70 | 15.73 | 0.91 |
| 295.0331 | 19.41  | 21.60 | 21.99 | 21.45 | 21.28 | 0.08 |
| 295.0737 | 21.68  | 16.18 | 16.48 | 16.51 | 16.34 | 0.40 |
| 295.1089 | 168.76 | 14.66 | 13.29 | 13.12 | 14.93 | 0.65 |
| 295.1174 | 62.32  | 9.02  | 17.87 | 8.46  | 8.24  | 0.96 |

|          |        |       |       |       |       |      |
|----------|--------|-------|-------|-------|-------|------|
| 295.1320 | 211.93 | 15.33 | 9.33  | 10.05 | 9.73  | 1.60 |
| 295.1555 | 172.79 | 15.93 | 15.43 | 16.06 | 15.85 | 0.29 |
| 295.1753 | 167.66 | 15.86 | 15.12 | 14.83 | 15.68 | 0.68 |
| 295.1895 | 201.59 | 18.77 | 17.42 | 17.62 | 18.40 | 1.20 |
| 295.2012 | 66.73  | 13.25 | 11.35 | 14.20 | 14.88 | 0.21 |
| 295.2281 | 262.02 | 21.16 | 19.64 | 19.79 | 20.09 | 1.45 |
| 295.2645 | 286.48 | 24.16 | 23.44 | 23.71 | 24.12 | 0.82 |
| 295.9279 | 53.02  | 16.65 | 15.73 | 16.72 | 16.71 | 0.58 |
| 296.0093 | 20.21  | 16.08 | 18.67 | 17.64 | 18.08 | 1.12 |
| 296.0229 | 20.98  | 17.05 | 18.15 | 18.13 | 17.88 | 1.22 |
| 296.0370 | 19.86  | 17.85 | 17.74 | 17.28 | 17.35 | 0.38 |
| 296.0524 | 25.17  | 15.74 | 18.34 | 18.58 | 17.13 | 2.00 |
| 296.1092 | 142.34 | 15.97 | 13.33 | 13.93 | 14.30 | 1.51 |
| 296.1268 | 289.92 | 17.15 | 14.39 | 15.60 | 15.78 | 1.03 |
| 296.1348 | 24.58  | 15.32 | 13.31 | 14.32 | 13.48 | 0.65 |
| 296.1929 | 202.57 | 15.72 | 13.78 | 13.91 | 15.10 | 1.08 |
| 296.2237 | 148.66 | 14.94 | 14.28 | 13.96 | 14.45 | 1.01 |
| 296.2316 | 202.65 | 18.42 | 18.16 | 18.04 | 17.93 | 0.63 |
| 296.2678 | 286.4  | 21.74 | 21.01 | 21.29 | 21.71 | 0.80 |
| 296.8178 | 92.06  | 16.30 | 16.42 | 16.68 | 16.63 | 0.53 |
| 296.8649 | 91.22  | 14.02 | 13.20 | 13.82 | 15.06 | 0.22 |
| 296.8830 | 51.23  | 22.99 | 23.11 | 23.91 | 23.78 | 0.90 |
| 296.8934 | 33.04  | 15.75 | 16.37 | 17.02 | 15.53 | 0.56 |
| 296.9025 | 70.58  | 15.69 | 15.07 | 16.56 | 16.42 | 0.15 |
| 296.9199 | 164.18 | 18.28 | 13.17 | 12.20 | 13.46 | 1.79 |
| 296.9377 | 34.54  | 13.93 | 13.36 | 13.73 | 15.09 | 0.09 |
| 296.9637 | 59.11  | 17.05 | 16.45 | 16.98 | 17.84 | 0.20 |
| 297.0001 | 20.77  | 15.98 | 16.05 | 16.02 | 16.44 | 0.12 |
| 297.0124 | 30.85  | 15.90 | 16.22 | 16.32 | 16.60 | 0.25 |
| 297.0292 | 19.8   | 16.56 | 16.45 | 15.71 | 15.89 | 0.42 |
| 297.0475 | 200.39 | 15.60 | 15.16 | 15.48 | 15.48 | 0.53 |
| 297.0476 | 53.77  | 15.60 | 16.13 | 17.24 | 17.03 | 0.75 |
| 297.0627 | 20.61  | 14.56 | 18.55 | 12.11 | 12.86 | 0.33 |
| 297.0713 | 22.45  | 14.89 | 14.64 | 15.04 | 16.19 | 0.05 |
| 297.0843 | 151.43 | 9.37  | 14.03 | 13.11 | 10.82 | 1.37 |
| 297.1041 | 32.78  | 16.57 | 14.63 | 14.61 | 15.19 | 1.14 |
| 297.1114 | 212.22 | 15.10 | 8.48  | 8.47  | 8.24  | 1.85 |
| 297.1348 | 157.81 | 15.32 | 14.52 | 14.94 | 14.44 | 0.66 |
| 297.1365 | 24.46  | 13.07 | 14.47 | 14.84 | 12.03 | 0.49 |
| 297.1532 | 150.35 | 15.68 | 15.52 | 15.60 | 14.89 | 0.15 |
| 297.1533 | 288.59 | 17.18 | 18.18 | 18.75 | 17.67 | 1.44 |
| 297.1712 | 169.96 | 16.40 | 15.25 | 15.82 | 15.50 | 0.79 |
| 297.2077 | 187.83 | 17.66 | 16.74 | 17.02 | 17.12 | 1.32 |
| 297.2232 | 226.89 | 16.64 | 15.14 | 16.38 | 16.58 | 0.93 |
| 297.2354 | 71.13  | 16.18 | 14.35 | 15.61 | 16.79 | 0.52 |
| 297.2439 | 227.42 | 22.69 | 22.16 | 22.25 | 22.69 | 0.37 |
| 297.2713 | 284    | 17.62 | 16.63 | 16.92 | 17.46 | 0.83 |
| 297.2802 | 291.89 | 18.02 | 18.11 | 18.51 | 18.50 | 0.49 |
| 297.2802 | 195.3  | 17.41 | 17.03 | 17.01 | 17.06 | 0.68 |
| 297.8853 | 37.72  | 18.73 | 18.47 | 19.45 | 19.23 | 0.40 |
| 297.9692 | 32.67  | 17.95 | 20.07 | 20.26 | 19.48 | 1.99 |
| 298.0247 | 23.44  | 18.87 | 19.37 | 19.50 | 19.44 | 1.16 |
| 298.0447 | 55.01  | 16.44 | 18.10 | 18.80 | 18.06 | 1.52 |
| 298.0697 | 19.28  | 16.91 | 16.60 | 16.35 | 17.33 | 0.29 |
| 298.1148 | 28.39  | 16.31 | 16.22 | 16.16 | 16.30 | 0.11 |
| 298.1574 | 63.54  | 15.52 | 16.34 | 15.19 | 16.85 | 0.22 |
| 298.2471 | 281.03 | 20.87 | 19.66 | 19.74 | 20.04 | 1.27 |
| 298.2838 | 292.78 | 15.62 | 14.60 | 15.20 | 15.33 | 0.32 |
| 298.8078 | 105.2  | 16.60 | 15.55 | 16.06 | 17.25 | 0.74 |
| 298.8336 | 75.92  | 16.68 | 16.52 | 16.97 | 16.89 | 0.15 |
| 298.8443 | 90.49  | 12.34 | 14.14 | 13.63 | 14.11 | 0.82 |
| 298.8621 | 96.88  | 14.47 | 13.99 | 14.36 | 14.22 | 0.36 |

|          |        |       |       |       |       |      |
|----------|--------|-------|-------|-------|-------|------|
| 298.8804 | 50.11  | 20.66 | 20.80 | 21.67 | 21.50 | 0.98 |
| 298.8871 | 40.89  | 16.34 | 15.49 | 16.63 | 16.46 | 0.42 |
| 298.9016 | 85.03  | 14.92 | 14.84 | 14.11 | 14.51 | 0.44 |
| 298.9329 | 32.6   | 15.95 | 14.29 | 15.16 | 14.89 | 0.70 |
| 298.9535 | 30.99  | 15.89 | 16.74 | 17.10 | 16.63 | 1.35 |
| 298.9730 | 37.55  | 13.61 | 14.58 | 14.76 | 14.09 | 0.78 |
| 299.0578 | 64.23  | 13.78 | 18.68 | 11.70 | 12.48 | 0.56 |
| 299.0698 | 35.43  | 19.40 | 19.72 | 20.08 | 19.14 | 0.39 |
| 299.0787 | 24.66  | 15.49 | 17.44 | 14.56 | 14.83 | 0.46 |
| 299.0812 | 290.58 | 17.81 | 15.16 | 16.97 | 17.12 | 1.28 |
| 299.1024 | 23.04  | 16.15 | 17.04 | 16.95 | 16.82 | 1.09 |
| 299.1140 | 153.3  | 15.13 | 14.44 | 13.93 | 14.44 | 0.98 |
| 299.1504 | 157.4  | 15.84 | 15.33 | 15.76 | 15.38 | 0.44 |
| 299.1870 | 194.27 | 17.16 | 16.45 | 16.73 | 16.60 | 0.88 |
| 299.2020 | 194.19 | 18.17 | 15.87 | 16.75 | 16.86 | 1.64 |
| 299.2022 | 53.51  | 16.12 | 12.88 | 14.83 | 14.99 | 1.05 |
| 299.2234 | 234.39 | 21.86 | 21.87 | 21.91 | 21.95 | 0.08 |
| 299.2510 | 178.36 | 17.73 | 17.27 | 16.97 | 17.39 | 0.86 |
| 299.2596 | 206.19 | 21.60 | 20.47 | 21.01 | 21.03 | 1.12 |
| 299.8818 | 30.52  | 17.10 | 15.51 | 16.66 | 16.99 | 0.85 |
| 299.9752 | 33.79  | 17.75 | 18.70 | 18.66 | 18.00 | 1.32 |
| 300.0405 | 21.3   | 20.19 | 21.35 | 21.20 | 20.78 | 1.74 |
| 300.0499 | 18.39  | 20.50 | 20.98 | 20.95 | 21.23 | 0.65 |
| 300.0595 | 18.33  | 16.58 | 16.11 | 16.89 | 16.72 | 0.07 |
| 300.2020 | 166.51 | 16.06 | 15.76 | 15.55 | 15.11 | 0.41 |
| 300.2265 | 223.35 | 19.29 | 19.17 | 19.30 | 19.38 | 0.10 |
| 300.2548 | 181.25 | 14.84 | 14.12 | 14.74 | 14.85 | 0.44 |
| 300.2629 | 201.66 | 19.57 | 18.78 | 18.91 | 18.94 | 1.04 |
| 300.8599 | 74.81  | 17.10 | 17.56 | 18.30 | 18.24 | 1.33 |
| 300.8752 | 130.44 | 16.89 | 15.81 | 15.31 | 16.67 | 0.92 |
| 300.8850 | 43.85  | 12.73 | 11.21 | 14.54 | 14.33 | 0.06 |
| 300.8906 | 92.78  | 16.97 | 15.33 | 15.90 | 16.54 | 1.65 |
| 300.9324 | 165.5  | 12.97 | 15.53 | 15.58 | 15.68 | 1.56 |
| 300.9536 | 154.26 | 17.32 | 15.72 | 15.38 | 16.58 | 1.42 |
| 301.0094 | 27.76  | 16.49 | 16.21 | 16.30 | 16.28 | 0.30 |
| 301.0237 | 24.72  | 16.03 | 16.70 | 15.65 | 15.76 | 0.14 |
| 301.0441 | 16.83  | 17.26 | 18.26 | 18.45 | 18.31 | 1.33 |
| 301.0538 | 28.53  | 17.11 | 17.82 | 16.88 | 17.17 | 0.33 |
| 301.0597 | 29.4   | 16.25 | 16.99 | 17.10 | 16.30 | 0.93 |
| 301.0665 | 18.11  | 16.04 | 12.69 | 12.31 | 13.44 | 1.60 |
| 301.0759 | 28.4   | 13.52 | 15.11 | 11.35 | 12.04 | 0.17 |
| 301.0925 | 88.45  | 10.89 | 12.93 | 13.46 | 14.91 | 0.79 |
| 301.1058 | 208.77 | 14.96 | 9.05  | 8.99  | 9.20  | 1.92 |
| 301.1185 | 26.91  | 14.76 | 16.84 | 17.42 | 16.46 | 1.74 |
| 301.1298 | 157.12 | 14.46 | 14.41 | 15.52 | 14.13 | 0.26 |
| 301.1303 | 18.94  | 12.59 | 12.72 | 12.60 | 11.86 | 0.01 |
| 301.1580 | 31.04  | 15.67 | 16.76 | 17.11 | 16.26 | 1.15 |
| 301.1666 | 214.07 | 18.32 | 19.63 | 19.66 | 18.68 | 1.54 |
| 301.2038 | 154.93 | 14.97 | 16.22 | 15.44 | 14.48 | 0.59 |
| 301.2098 | 207.76 | 16.26 | 15.41 | 15.12 | 16.08 | 0.61 |
| 301.2178 | 214.6  | 27.54 | 27.42 | 27.46 | 27.48 | 0.15 |
| 301.2181 | 101.39 | 21.05 | 19.51 | 20.40 | 20.88 | 1.13 |
| 301.2390 | 257.26 | 23.94 | 24.14 | 24.17 | 24.07 | 0.70 |
| 301.9258 | 22.27  | 18.40 | 18.64 | 18.51 | 18.92 | 0.32 |
| 302.0291 | 19.4   | 14.73 | 14.40 | 14.61 | 15.69 | 0.06 |
| 302.0362 | 20.82  | 14.49 | 15.67 | 15.48 | 14.54 | 0.71 |
| 302.0558 | 20.25  | 16.26 | 16.54 | 16.37 | 16.24 | 0.18 |
| 302.0671 | 23.1   | 20.52 | 22.15 | 22.03 | 20.98 | 0.78 |
| 302.0888 | 141.02 | 14.69 | 11.43 | 11.47 | 12.80 | 1.84 |
| 302.1014 | 173.95 | 14.98 | 16.12 | 16.63 | 16.19 | 1.21 |
| 302.1018 | 22     | 22.66 | 23.22 | 23.18 | 22.86 | 0.82 |
| 302.1558 | 29.69  | 17.24 | 15.58 | 15.70 | 15.53 | 0.97 |

|          |        |       |       |       |       |      |
|----------|--------|-------|-------|-------|-------|------|
| 302.1685 | 215.77 | 13.55 | 15.87 | 15.91 | 14.34 | 1.29 |
| 302.2210 | 209.95 | 25.34 | 25.13 | 25.33 | 25.23 | 0.17 |
| 302.2213 | 97.43  | 18.59 | 16.51 | 17.69 | 18.01 | 1.16 |
| 302.2424 | 263.82 | 21.32 | 21.60 | 21.66 | 21.52 | 0.90 |
| 302.5345 | 17.52  | 15.41 | 16.69 | 16.84 | 16.39 | 1.13 |
| 302.8386 | 45.73  | 17.93 | 16.72 | 19.69 | 19.05 | 0.16 |
| 302.8489 | 45.7   | 19.82 | 17.56 | 19.61 | 19.98 | 0.96 |
| 302.8579 | 82.52  | 14.85 | 14.27 | 15.09 | 15.23 | 0.10 |
| 302.8649 | 159.66 | 16.69 | 15.22 | 15.05 | 15.95 | 1.50 |
| 302.9107 | 37.79  | 21.81 | 22.30 | 21.71 | 21.40 | 0.12 |
| 302.9112 | 239.47 | 18.16 | 16.96 | 17.41 | 17.52 | 1.20 |
| 302.9246 | 234.09 | 17.64 | 16.49 | 17.09 | 17.11 | 1.12 |
| 302.9693 | 41.46  | 18.41 | 19.53 | 19.30 | 19.47 | 0.94 |
| 302.9832 | 25.54  | 16.32 | 16.53 | 17.09 | 16.01 | 0.17 |
| 303.0163 | 26.32  | 16.20 | 18.40 | 18.60 | 18.12 | 1.57 |
| 303.0189 | 233.67 | 16.09 | 14.49 | 15.24 | 15.71 | 0.98 |
| 303.0370 | 187.7  | 10.41 | 13.02 | 13.00 | 13.07 | 1.37 |
| 303.0436 | 239.87 | 16.61 | 15.18 | 15.51 | 15.97 | 0.96 |
| 303.0512 | 18.87  | 20.81 | 20.57 | 20.97 | 21.19 | 0.00 |
| 303.0607 | 233.8  | 17.22 | 16.29 | 16.66 | 16.55 | 0.99 |
| 303.0686 | 23.71  | 16.40 | 16.85 | 18.49 | 16.90 | 0.39 |
| 303.0725 | 70.75  | 11.17 | 19.82 | 5.01  | 5.37  | 0.17 |
| 303.0844 | 18.92  | 15.50 | 15.97 | 16.38 | 17.11 | 0.53 |
| 303.1052 | 25.71  | 18.98 | 19.47 | 19.47 | 19.14 | 0.70 |
| 303.1055 | 226.25 | 16.60 | 15.60 | 16.18 | 16.33 | 0.65 |
| 303.1117 | 289.34 | 17.19 | 14.75 | 13.65 | 14.47 | 1.20 |
| 303.1197 | 200.85 | 16.51 | 15.42 | 14.20 | 14.54 | 0.75 |
| 303.1645 | 231.81 | 17.40 | 16.40 | 16.76 | 17.41 | 0.39 |
| 303.2002 | 171.92 | 15.42 | 16.20 | 14.58 | 15.89 | 0.06 |
| 303.2245 | 216.33 | 21.93 | 21.72 | 21.97 | 21.80 | 0.12 |
| 303.2335 | 239.28 | 30.78 | 30.81 | 31.05 | 31.12 | 0.36 |
| 303.4069 | 233.98 | 17.05 | 16.13 | 16.49 | 16.66 | 0.99 |
| 303.4269 | 240.03 | 16.60 | 15.63 | 15.88 | 16.12 | 1.13 |
| 303.4346 | 234.04 | 16.66 | 15.01 | 15.73 | 15.98 | 1.23 |
| 303.5438 | 234.04 | 17.49 | 16.39 | 16.89 | 17.09 | 1.08 |
| 303.5572 | 234.25 | 18.15 | 17.38 | 17.82 | 17.92 | 0.90 |
| 303.9150 | 35.58  | 16.99 | 17.71 | 17.57 | 17.14 | 0.84 |
| 303.9228 | 26.17  | 16.55 | 16.71 | 16.44 | 17.08 | 0.14 |
| 304.0031 | 32.71  | 15.92 | 17.23 | 17.49 | 16.07 | 1.33 |
| 304.0093 | 29.36  | 15.85 | 16.27 | 16.21 | 16.04 | 0.55 |
| 304.0351 | 18.29  | 18.23 | 19.46 | 19.44 | 19.21 | 1.31 |
| 304.0547 | 22.64  | 17.27 | 16.62 | 17.11 | 17.43 | 0.41 |
| 304.0626 | 20.13  | 19.89 | 21.44 | 21.27 | 20.89 | 1.32 |
| 304.0717 | 24.32  | 18.02 | 19.64 | 19.04 | 19.03 | 1.39 |
| 304.1058 | 27.25  | 16.48 | 16.18 | 16.30 | 16.04 | 0.42 |
| 304.1351 | 27.1   | 18.82 | 18.46 | 18.74 | 18.41 | 0.36 |
| 304.2276 | 211.68 | 18.23 | 18.04 | 18.22 | 18.14 | 0.15 |
| 304.2360 | 240.03 | 28.74 | 28.56 | 28.91 | 29.02 | 0.03 |
| 304.8377 | 69.93  | 15.33 | 15.32 | 16.51 | 15.57 | 0.58 |
| 304.8492 | 86.41  | 22.05 | 22.28 | 22.52 | 22.14 | 0.66 |
| 304.8621 | 128.39 | 14.94 | 13.44 | 13.30 | 14.33 | 1.22 |
| 304.8701 | 105.03 | 15.84 | 15.19 | 15.45 | 15.46 | 0.93 |
| 304.8862 | 92.28  | 13.85 | 14.43 | 14.98 | 14.52 | 0.93 |
| 304.9121 | 34.11  | 17.62 | 18.15 | 17.72 | 18.02 | 0.35 |
| 304.9276 | 36.87  | 21.98 | 23.25 | 23.13 | 23.04 | 1.76 |
| 304.9406 | 25.16  | 12.97 | 14.53 | 14.93 | 13.72 | 1.03 |
| 304.9649 | 37.65  | 14.23 | 14.33 | 15.43 | 15.18 | 0.26 |
| 304.9843 | 21.17  | 17.40 | 19.76 | 19.75 | 19.30 | 1.75 |
| 304.9923 | 16.9   | 12.63 | 14.99 | 15.18 | 15.08 | 1.52 |
| 305.0184 | 18.97  | 17.72 | 18.27 | 18.37 | 18.33 | 0.56 |
| 305.0385 | 17.8   | 14.21 | 14.31 | 14.51 | 14.16 | 0.09 |
| 305.0480 | 22.08  | 19.23 | 19.10 | 19.35 | 19.57 | 0.03 |

|          |        |       |       |       |       |      |
|----------|--------|-------|-------|-------|-------|------|
| 305.0694 | 20.69  | 18.73 | 21.23 | 21.40 | 21.23 | 1.44 |
| 305.1270 | 291.43 | 18.32 | 15.81 | 16.07 | 16.31 | 1.32 |
| 305.1763 | 292.6  | 17.47 | 16.47 | 16.95 | 16.41 | 0.61 |
| 305.2397 | 240.64 | 25.50 | 25.09 | 25.49 | 25.65 | 0.35 |
| 305.2490 | 256.95 | 28.39 | 27.88 | 28.08 | 28.42 | 0.85 |
| 305.5714 | 18.05  | 16.12 | 18.81 | 18.88 | 18.96 | 1.33 |
| 305.8527 | 84.44  | 16.49 | 16.60 | 16.99 | 16.58 | 0.67 |
| 305.9116 | 30.58  | 11.59 | 13.83 | 14.55 | 13.66 | 0.95 |
| 305.9206 | 32.22  | 15.05 | 14.53 | 14.77 | 14.44 | 0.34 |
| 305.9309 | 43.78  | 17.05 | 18.36 | 18.21 | 18.12 | 1.89 |
| 305.9617 | 34.02  | 15.77 | 15.21 | 16.00 | 15.34 | 0.20 |
| 306.0404 | 285.6  | 16.41 | 16.50 | 16.62 | 17.47 | 0.16 |
| 306.0688 | 19.71  | 15.26 | 16.11 | 16.45 | 16.16 | 0.62 |
| 306.0774 | 22.4   | 25.38 | 26.54 | 26.13 | 25.56 | 0.67 |
| 306.1116 | 212.7  | 15.54 | 10.01 | 10.07 | 11.03 | 2.03 |
| 306.2416 | 233.76 | 21.15 | 20.60 | 20.97 | 21.10 | 0.69 |
| 306.2523 | 251.7  | 26.26 | 25.61 | 26.02 | 26.19 | 0.81 |
| 306.8530 | 102.18 | 14.53 | 14.11 | 14.04 | 13.96 | 0.45 |
| 306.8649 | 71.18  | 22.27 | 22.40 | 22.94 | 22.53 | 0.85 |
| 306.8776 | 30.1   | 12.87 | 14.70 | 14.45 | 14.00 | 0.67 |
| 306.8987 | 33.35  | 13.73 | 14.04 | 14.68 | 14.26 | 0.43 |
| 306.9047 | 83.9   | 16.24 | 15.09 | 15.75 | 16.19 | 1.28 |
| 306.9226 | 36.1   | 18.68 | 19.75 | 19.97 | 19.41 | 1.50 |
| 306.9314 | 44.84  | 15.96 | 16.53 | 16.41 | 16.37 | 1.21 |
| 306.9412 | 20.92  | 13.27 | 12.67 | 13.93 | 14.07 | 0.04 |
| 306.9815 | 43.7   | 16.66 | 13.80 | 14.77 | 14.10 | 0.79 |
| 307.0040 | 27.24  | 16.36 | 17.97 | 17.81 | 17.75 | 1.46 |
| 307.0747 | 25.53  | 19.71 | 21.14 | 20.86 | 20.53 | 1.58 |
| 307.0808 | 19.4   | 22.03 | 23.03 | 22.59 | 22.05 | 0.53 |
| 307.1153 | 22.37  | 17.72 | 18.93 | 18.34 | 18.03 | 1.26 |
| 307.1285 | 62.44  | 17.44 | 19.13 | 16.93 | 17.01 | 0.66 |
| 307.1430 | 290.28 | 16.43 | 11.35 | 10.62 | 11.85 | 1.77 |
| 307.1587 | 288.42 | 17.25 | 18.36 | 18.67 | 17.25 | 0.96 |
| 307.1948 | 176.47 | 17.95 | 17.48 | 17.78 | 17.86 | 0.35 |
| 307.1951 | 289.92 | 17.05 | 17.29 | 18.22 | 16.96 | 0.56 |
| 307.2283 | 84.17  | 18.15 | 15.69 | 17.33 | 17.97 | 0.92 |
| 307.2557 | 255.14 | 22.96 | 22.10 | 22.46 | 22.66 | 1.13 |
| 307.2646 | 272.1  | 26.97 | 26.41 | 26.78 | 26.86 | 0.65 |
| 307.8685 | 70.94  | 16.84 | 16.45 | 17.34 | 16.91 | 0.04 |
| 307.9129 | 29.52  | 14.57 | 15.06 | 14.76 | 15.10 | 0.30 |
| 307.9353 | 67.03  | 15.23 | 14.82 | 16.32 | 15.85 | 0.24 |
| 307.9772 | 37.51  | 15.81 | 14.22 | 14.94 | 14.41 | 0.71 |
| 308.0331 | 28.67  | 16.44 | 13.51 | 13.57 | 14.36 | 1.17 |
| 308.0637 | 26.99  | 14.73 | 16.77 | 16.89 | 16.11 | 1.73 |
| 308.0733 | 18.94  | 20.57 | 21.58 | 21.03 | 20.61 | 0.46 |
| 308.1271 | 216.94 | 14.60 | 7.70  | 7.62  | 8.10  | 2.10 |
| 308.1272 | 25.84  | 12.17 | 6.98  | 7.11  | 8.36  | 1.69 |
| 308.2587 | 256.09 | 18.37 | 16.94 | 17.51 | 17.84 | 1.24 |
| 308.2679 | 276.24 | 24.85 | 24.10 | 24.47 | 24.57 | 0.92 |
| 308.8457 | 88.61  | 15.07 | 14.75 | 15.09 | 14.81 | 0.37 |
| 308.8571 | 52.59  | 17.63 | 16.12 | 16.21 | 16.07 | 1.15 |
| 308.8688 | 85.81  | 15.51 | 14.49 | 15.28 | 15.12 | 0.79 |
| 308.9164 | 146.42 | 13.49 | 17.36 | 17.01 | 17.46 | 1.50 |
| 308.9168 | 27.65  | 17.61 | 20.36 | 20.37 | 19.89 | 1.99 |
| 308.9400 | 49.18  | 18.76 | 16.66 | 17.66 | 17.67 | 0.97 |
| 308.9614 | 42.05  | 19.32 | 19.96 | 20.32 | 20.09 | 1.21 |
| 308.9844 | 32.99  | 16.44 | 16.07 | 15.91 | 16.53 | 0.58 |
| 309.0202 | 38.95  | 16.61 | 15.49 | 16.23 | 16.47 | 0.41 |
| 309.0703 | 21.03  | 14.26 | 15.49 | 15.46 | 14.03 | 0.57 |
| 309.0779 | 25     | 17.63 | 17.95 | 18.01 | 17.56 | 0.27 |
| 309.0876 | 38.72  | 17.42 | 26.20 | 18.21 | 17.35 | 1.31 |
| 309.1095 | 22.4   | 15.54 | 20.16 | 14.71 | 14.92 | 0.71 |



|          |        |       |       |       |       |      |
|----------|--------|-------|-------|-------|-------|------|
| 309.1221 | 290.28 | 17.08 | 12.56 | 15.48 | 13.80 | 1.26 |
| 309.1691 | 37.61  | 14.89 | 15.05 | 14.12 | 14.49 | 0.20 |
| 309.1745 | 287.46 | 17.92 | 20.03 | 20.53 | 18.93 | 1.98 |
| 309.1747 | 154.12 | 19.61 | 19.12 | 18.40 | 20.34 | 0.43 |
| 309.2070 | 185.77 | 18.57 | 16.75 | 17.10 | 17.42 | 1.50 |
| 309.2228 | 233.45 | 16.48 | 14.46 | 15.76 | 15.80 | 1.05 |
| 309.2440 | 172.09 | 15.59 | 13.37 | 13.76 | 14.59 | 1.32 |
| 309.2713 | 276.14 | 21.30 | 20.45 | 20.83 | 20.96 | 0.91 |
| 309.2803 | 295.53 | 20.68 | 21.21 | 22.29 | 20.88 | 0.55 |
| 309.9483 | 23.32  | 14.73 | 15.04 | 14.32 | 14.47 | 0.03 |
| 309.9695 | 25.76  | 14.26 | 14.94 | 14.28 | 14.36 | 0.32 |
| 310.0014 | 20.76  | 13.66 | 15.42 | 13.45 | 13.97 | 0.38 |
| 310.0248 | 18.29  | 17.32 | 18.82 | 18.26 | 17.83 | 0.78 |
| 310.0822 | 49.7   | 14.05 | 17.89 | 12.02 | 12.79 | 0.41 |
| 310.0915 | 30.59  | 20.97 | 23.11 | 21.97 | 21.56 | 1.46 |
| 310.1110 | 29.23  | 14.56 | 16.40 | 13.08 | 13.55 | 0.16 |
| 310.1152 | 26.13  | 16.22 | 14.51 | 15.10 | 15.51 | 0.95 |
| 310.1265 | 25.03  | 12.05 | 15.49 | 12.00 | 12.85 | 0.47 |
| 310.1517 | 27.9   | 16.11 | 15.42 | 14.37 | 14.39 | 0.64 |
| 310.1779 | 143.71 | 16.55 | 16.22 | 15.51 | 16.98 | 0.39 |
| 310.2392 | 116.85 | 15.74 | 12.26 | 13.13 | 14.08 | 1.67 |
| 310.2836 | 300.42 | 17.21 | 18.98 | 19.99 | 18.35 | 0.84 |
| 310.7945 | 91.12  | 15.95 | 16.79 | 16.99 | 16.91 | 1.32 |
| 310.8585 | 60.34  | 15.36 | 12.53 | 15.52 | 15.32 | 0.78 |
| 310.8728 | 42.61  | 17.60 | 17.03 | 17.53 | 16.80 | 0.55 |
| 310.8837 | 45.29  | 9.84  | 13.28 | 13.18 | 10.75 | 0.93 |
| 310.9005 | 48.69  | 20.47 | 19.67 | 20.07 | 20.65 | 0.51 |
| 310.9568 | 44.89  | 13.86 | 13.91 | 14.61 | 13.89 | 0.20 |
| 310.9795 | 22.63  | 13.64 | 12.13 | 14.56 | 15.42 | 0.06 |
| 311.0283 | 18.06  | 17.79 | 19.87 | 18.85 | 17.88 | 0.77 |
| 311.0506 | 31.07  | 16.78 | 15.86 | 15.80 | 16.23 | 0.77 |
| 311.0693 | 27.97  | 16.58 | 15.04 | 15.39 | 15.18 | 1.25 |
| 311.0849 | 62.56  | 8.85  | 22.24 | 10.34 | 9.24  | 1.29 |
| 311.0938 | 41.64  | 12.79 | 18.93 | 14.06 | 13.38 | 1.26 |
| 311.0999 | 242.07 | 17.95 | 17.73 | 17.82 | 17.30 | 0.17 |
| 311.1514 | 161.39 | 15.27 | 14.60 | 14.51 | 14.51 | 0.85 |
| 311.1637 | 198.75 | 16.41 | 14.97 | 15.67 | 15.56 | 0.68 |
| 311.1690 | 288.22 | 19.33 | 20.53 | 21.06 | 20.09 | 1.81 |
| 311.1693 | 145.43 | 21.05 | 21.45 | 20.73 | 21.43 | 0.12 |
| 311.1763 | 225.68 | 16.69 | 15.81 | 15.54 | 16.45 | 0.78 |
| 311.1850 | 171.37 | 14.82 | 14.52 | 14.22 | 14.22 | 0.47 |
| 311.2021 | 219.82 | 14.28 | 13.67 | 15.47 | 12.05 | 0.07 |
| 311.2235 | 237.24 | 19.42 | 18.55 | 18.74 | 18.61 | 1.04 |
| 311.2596 | 192.2  | 17.10 | 16.05 | 16.40 | 16.45 | 1.09 |
| 311.2869 | 297.82 | 15.41 | 14.90 | 16.30 | 15.04 | 0.04 |
| 311.2959 | 277.66 | 17.54 | 17.33 | 17.52 | 17.37 | 0.30 |
| 311.9020 | 57.36  | 15.64 | 15.36 | 15.34 | 15.39 | 0.28 |
| 311.9545 | 28.77  | 17.38 | 18.20 | 18.21 | 18.04 | 1.56 |
| 311.9756 | 34.15  | 13.05 | 12.03 | 12.07 | 13.44 | 0.26 |
| 312.0197 | 33.04  | 14.51 | 15.98 | 15.36 | 16.60 | 1.11 |
| 312.0279 | 19.92  | 16.92 | 18.82 | 18.71 | 18.40 | 1.75 |
| 312.0879 | 32.51  | 15.89 | 18.77 | 16.62 | 16.23 | 1.18 |
| 312.0959 | 24.71  | 21.15 | 22.59 | 22.48 | 21.56 | 0.80 |
| 312.1723 | 290.71 | 15.07 | 17.17 | 17.54 | 16.60 | 1.55 |
| 312.1726 | 131.32 | 18.56 | 18.63 | 17.76 | 18.67 | 0.24 |
| 312.2267 | 179.36 | 17.88 | 16.91 | 17.00 | 17.21 | 1.15 |
| 312.2308 | 272.84 | 18.63 | 17.28 | 17.63 | 16.97 | 0.89 |
| 312.2550 | 159.28 | 17.93 | 17.17 | 17.87 | 17.43 | 0.71 |
| 312.4645 | 16.78  | 13.25 | 13.70 | 14.85 | 12.78 | 0.46 |
| 312.7920 | 91.89  | 14.97 | 15.25 | 15.48 | 15.51 | 0.53 |
| 312.8102 | 82.16  | 16.33 | 16.68 | 17.12 | 17.01 | 1.01 |
| 312.8231 | 288.15 | 17.45 | 18.25 | 18.07 | 18.59 | 1.04 |

|          |        |       |       |       |       |      |
|----------|--------|-------|-------|-------|-------|------|
| 312.8235 | 213.94 | 16.35 | 13.40 | 12.39 | 15.28 | 1.34 |
| 312.8650 | 27.48  | 15.34 | 14.78 | 15.18 | 14.84 | 0.24 |
| 312.8702 | 35.93  | 16.18 | 15.79 | 15.31 | 14.97 | 0.78 |
| 312.8777 | 58.96  | 16.46 | 14.87 | 17.35 | 17.31 | 0.27 |
| 312.8858 | 24.1   | 15.77 | 17.29 | 17.67 | 16.96 | 1.62 |
| 312.8956 | 81.51  | 18.05 | 16.14 | 17.79 | 17.52 | 1.01 |
| 312.9379 | 70.95  | 16.84 | 15.06 | 16.69 | 18.11 | 0.58 |
| 312.9488 | 22.37  | 13.60 | 11.62 | 13.25 | 14.54 | 0.45 |
| 312.9740 | 84.38  | 15.38 | 14.40 | 14.03 | 15.25 | 0.72 |
| 313.0221 | 52.73  | 15.34 | 14.88 | 16.80 | 16.92 | 0.41 |
| 313.0315 | 30.87  | 14.86 | 14.82 | 14.70 | 14.32 | 0.10 |
| 313.0454 | 18.29  | 14.94 | 14.52 | 16.28 | 16.26 | 0.27 |
| 313.0789 | 269.59 | 15.57 | 16.74 | 18.32 | 16.16 | 0.91 |
| 313.0856 | 38.16  | 14.65 | 14.27 | 14.28 | 13.21 | 0.23 |
| 313.0933 | 144.21 | 14.93 | 14.45 | 14.72 | 14.80 | 0.48 |
| 313.0934 | 26.55  | 14.49 | 15.72 | 15.80 | 15.18 | 0.67 |
| 313.0993 | 23.26  | 18.47 | 19.22 | 19.20 | 18.40 | 0.46 |
| 313.1141 | 27.67  | 13.49 | 13.39 | 13.44 | 14.32 | 0.02 |
| 313.1204 | 25.07  | 15.90 | 17.49 | 17.59 | 17.67 | 1.26 |
| 313.1299 | 154.34 | 15.30 | 14.89 | 15.15 | 14.93 | 0.45 |
| 313.1301 | 28.18  | 16.06 | 16.67 | 16.81 | 16.16 | 0.81 |
| 313.1654 | 143.73 | 17.03 | 16.91 | 16.40 | 17.00 | 0.34 |
| 313.1760 | 144.46 | 14.71 | 14.30 | 13.04 | 14.49 | 0.47 |
| 313.1927 | 251.02 | 17.11 | 16.83 | 16.79 | 17.35 | 0.26 |
| 313.2026 | 159.93 | 16.19 | 15.45 | 15.70 | 15.69 | 0.89 |
| 313.2176 | 208.18 | 16.45 | 14.99 | 16.33 | 15.75 | 0.86 |
| 313.2388 | 257.22 | 19.56 | 18.78 | 18.85 | 18.83 | 1.08 |
| 313.2584 | 167.2  | 15.48 | 13.88 | 14.86 | 14.54 | 1.30 |
| 313.2753 | 189.32 | 15.91 | 15.03 | 14.55 | 15.00 | 1.34 |
| 313.9339 | 35.87  | 16.01 | 16.30 | 16.13 | 15.58 | 0.18 |
| 313.9433 | 40.41  | 18.34 | 19.91 | 20.09 | 19.35 | 1.76 |
| 314.0194 | 29.63  | 17.98 | 19.06 | 18.57 | 19.35 | 0.97 |
| 314.0292 | 21     | 14.41 | 15.80 | 16.11 | 16.00 | 1.44 |
| 314.0410 | 34.57  | 15.82 | 15.04 | 14.95 | 15.24 | 0.81 |
| 314.0754 | 21.11  | 14.29 | 15.58 | 15.37 | 15.27 | 0.74 |
| 314.1012 | 26.1   | 15.46 | 14.00 | 15.44 | 14.98 | 0.35 |
| 314.1204 | 23.98  | 16.85 | 16.24 | 16.41 | 16.86 | 0.44 |
| 314.1730 | 28.08  | 9.18  | 15.97 | 8.48  | 8.97  | 1.03 |
| 314.2166 | 176.38 | 14.25 | 14.90 | 15.27 | 13.81 | 0.50 |
| 314.2429 | 161.84 | 16.24 | 15.30 | 15.49 | 15.81 | 0.64 |
| 314.2460 | 299.15 | 15.77 | 15.91 | 16.64 | 15.59 | 0.23 |
| 314.8075 | 86.66  | 15.04 | 15.16 | 15.60 | 15.50 | 0.37 |
| 314.8620 | 30.89  | 15.31 | 14.11 | 15.02 | 14.27 | 0.54 |
| 314.8757 | 77.06  | 15.26 | 14.89 | 15.77 | 15.95 | 0.13 |
| 314.8843 | 30.23  | 14.23 | 15.48 | 15.49 | 14.71 | 0.74 |
| 314.8923 | 118.2  | 14.75 | 12.21 | 13.51 | 14.37 | 1.10 |
| 314.9065 | 19.12  | 16.64 | 16.72 | 16.89 | 16.99 | 0.22 |
| 314.9276 | 34.76  | 16.04 | 15.99 | 16.25 | 16.07 | 0.08 |
| 314.9691 | 162.5  | 14.78 | 11.36 | 11.26 | 14.14 | 1.34 |
| 314.9693 | 34.83  | 16.71 | 18.13 | 18.13 | 17.78 | 1.49 |
| 315.0254 | 27.51  | 17.78 | 18.43 | 18.08 | 18.03 | 0.72 |
| 315.0434 | 34.05  | 18.89 | 18.49 | 19.01 | 18.33 | 0.17 |
| 315.0961 | 40.89  | 15.17 | 21.32 | 15.13 | 14.61 | 1.03 |
| 315.1442 | 21.68  | 12.96 | 14.87 | 15.44 | 13.32 | 0.89 |
| 315.1452 | 156.82 | 14.18 | 14.62 | 15.08 | 14.24 | 0.49 |
| 315.1815 | 285.62 | 14.25 | 17.05 | 17.30 | 16.62 | 1.77 |
| 315.1815 | 169.55 | 16.91 | 17.00 | 17.70 | 16.48 | 0.39 |
| 315.1973 | 26.7   | 19.14 | 17.51 | 18.62 | 19.94 | 0.46 |
| 315.2106 | 239.83 | 19.39 | 18.13 | 18.34 | 18.86 | 1.65 |
| 315.2190 | 175.04 | 16.29 | 16.91 | 16.83 | 15.97 | 0.66 |
| 315.2333 | 228.2  | 22.78 | 22.13 | 22.34 | 22.03 | 0.96 |
| 315.2543 | 273.59 | 18.95 | 18.66 | 18.81 | 19.09 | 0.31 |

|          |        |       |       |       |       |      |
|----------|--------|-------|-------|-------|-------|------|
| 315.7024 | 233.1  | 15.50 | 13.66 | 14.32 | 15.92 | 0.70 |
| 315.9412 | 34.41  | 13.81 | 14.68 | 15.00 | 14.03 | 0.77 |
| 315.9492 | 35.96  | 17.88 | 18.15 | 18.32 | 17.51 | 0.29 |
| 315.9883 | 24.27  | 16.24 | 16.09 | 16.37 | 17.01 | 0.07 |
| 316.0148 | 44.08  | 10.06 | 11.50 | 12.56 | 14.03 | 0.69 |
| 316.0399 | 20.84  | 19.14 | 20.30 | 20.28 | 20.29 | 1.65 |
| 316.0813 | 19.98  | 15.10 | 16.58 | 16.57 | 16.73 | 1.34 |
| 316.0985 | 53.88  | 14.58 | 17.91 | 12.87 | 13.44 | 0.44 |
| 316.1034 | 172.17 | 10.79 | 6.38  | 16.35 | 9.31  | 0.04 |
| 316.1175 | 28.77  | 16.03 | 15.53 | 15.29 | 14.98 | 0.47 |
| 316.1465 | 25.31  | 17.81 | 18.26 | 18.14 | 18.00 | 0.47 |
| 316.1716 | 26.86  | 19.13 | 18.02 | 18.15 | 17.78 | 1.19 |
| 316.2007 | 25.51  | 16.67 | 14.56 | 15.56 | 17.27 | 0.71 |
| 316.2372 | 233.61 | 20.42 | 19.70 | 19.94 | 19.57 | 1.03 |
| 316.2496 | 215.41 | 13.61 | 12.67 | 11.96 | 14.97 | 0.50 |
| 316.6052 | 171.97 | 13.38 | 11.69 | 13.84 | 12.13 | 0.86 |
| 316.8548 | 78.47  | 15.17 | 15.38 | 16.26 | 15.99 | 0.82 |
| 316.8645 | 86.08  | 15.34 | 13.78 | 14.86 | 15.50 | 0.73 |
| 316.8894 | 143.92 | 16.92 | 15.92 | 15.35 | 17.09 | 0.86 |
| 316.9013 | 23.95  | 14.52 | 12.23 | 12.60 | 11.55 | 0.68 |
| 316.9066 | 32.97  | 16.96 | 17.69 | 18.03 | 17.83 | 1.14 |
| 316.9075 | 194.19 | 15.27 | 15.97 | 15.95 | 15.69 | 1.25 |
| 316.9274 | 153.75 | 16.09 | 16.17 | 15.72 | 16.50 | 0.06 |
| 316.9277 | 60.19  | 19.49 | 18.36 | 18.00 | 18.28 | 1.38 |
| 316.9485 | 37.82  | 21.81 | 23.94 | 23.88 | 23.82 | 1.68 |
| 316.9832 | 30.1   | 18.04 | 16.47 | 16.26 | 17.42 | 1.22 |
| 317.0372 | 161.17 | 17.22 | 14.89 | 15.25 | 14.66 | 1.49 |
| 317.0822 | 167.49 | 15.19 | 14.20 | 14.23 | 14.62 | 1.53 |
| 317.1025 | 164.01 | 9.97  | 6.16  | 16.38 | 5.75  | 0.02 |
| 317.1275 | 289.15 | 17.35 | 14.13 | 12.90 | 14.57 | 1.39 |
| 317.1304 | 26.5   | 14.27 | 14.60 | 14.66 | 14.58 | 0.31 |
| 317.1365 | 199.24 | 16.23 | 13.65 | 14.35 | 14.29 | 1.07 |
| 317.1611 | 157.75 | 15.03 | 14.26 | 14.11 | 14.22 | 0.85 |
| 317.2127 | 186.39 | 18.38 | 16.79 | 16.33 | 16.47 | 1.43 |
| 317.2256 | 269.63 | 20.97 | 19.95 | 19.94 | 20.67 | 1.25 |
| 317.2397 | 235.04 | 16.03 | 15.03 | 15.12 | 13.88 | 0.83 |
| 317.2490 | 252.79 | 21.01 | 19.85 | 20.44 | 20.39 | 1.31 |
| 317.6042 | 164.46 | 13.42 | 11.73 | 14.08 | 12.18 | 0.74 |
| 317.8997 | 22.47  | 17.32 | 15.76 | 15.93 | 16.37 | 0.85 |
| 317.9304 | 34.51  | 14.16 | 15.42 | 15.33 | 15.80 | 0.92 |
| 317.9416 | 30.35  | 16.92 | 17.41 | 17.53 | 16.99 | 0.58 |
| 317.9518 | 38.32  | 17.38 | 19.52 | 19.50 | 19.42 | 1.72 |
| 317.9802 | 29.49  | 14.08 | 14.78 | 14.77 | 14.36 | 0.51 |
| 318.0045 | 25.89  | 15.06 | 15.32 | 15.48 | 15.69 | 0.25 |
| 318.0337 | 30.26  | 13.68 | 16.23 | 16.52 | 15.32 | 1.88 |
| 318.0620 | 21.96  | 17.92 | 18.06 | 18.53 | 18.44 | 0.46 |
| 318.1225 | 290.09 | 16.29 | 11.59 | 11.37 | 12.51 | 1.93 |
| 318.1585 | 286.11 | 13.20 | 17.50 | 15.03 | 17.70 | 1.28 |
| 318.2160 | 170.55 | 15.18 | 12.98 | 12.50 | 12.44 | 1.16 |
| 318.2292 | 265.06 | 18.18 | 16.50 | 16.79 | 17.85 | 0.80 |
| 318.2524 | 247.65 | 18.60 | 17.19 | 17.90 | 17.96 | 1.43 |
| 318.8313 | 22.11  | 13.46 | 12.96 | 13.20 | 13.87 | 0.15 |
| 318.8388 | 133.74 | 15.27 | 15.38 | 15.37 | 16.01 | 0.17 |
| 318.8649 | 82.81  | 18.08 | 18.04 | 18.24 | 18.10 | 0.11 |
| 318.8858 | 54.42  | 23.11 | 22.67 | 23.58 | 23.20 | 0.03 |
| 318.9048 | 88.33  | 14.26 | 14.53 | 14.67 | 14.90 | 0.40 |
| 318.9051 | 196.93 | 15.61 | 15.88 | 16.15 | 15.82 | 1.04 |
| 318.9287 | 25.29  | 12.83 | 13.74 | 13.37 | 13.25 | 0.41 |
| 318.9432 | 37.84  | 19.58 | 19.93 | 19.89 | 19.96 | 0.66 |
| 318.9526 | 43.78  | 15.75 | 17.56 | 17.51 | 17.49 | 1.61 |
| 318.9804 | 26.37  | 16.37 | 16.60 | 16.28 | 16.37 | 0.11 |
| 318.9932 | 31.27  | 15.19 | 15.00 | 14.64 | 14.81 | 0.30 |

|          |        |       |       |       |       |      |
|----------|--------|-------|-------|-------|-------|------|
| 319.0455 | 32.17  | 16.71 | 20.51 | 18.22 | 17.98 | 1.64 |
| 319.0791 | 26.63  | 15.23 | 14.94 | 14.88 | 15.23 | 0.21 |
| 319.1429 | 290.02 | 16.87 | 13.97 | 12.92 | 13.66 | 1.26 |
| 319.1893 | 185.56 | 16.27 | 13.26 | 13.45 | 14.52 | 1.59 |
| 319.2285 | 108.73 | 25.14 | 23.61 | 24.81 | 25.26 | 0.65 |
| 319.2415 | 297.3  | 15.30 | 14.74 | 15.49 | 15.29 | 0.13 |
| 319.2646 | 267.14 | 18.64 | 17.74 | 18.10 | 18.22 | 0.76 |
| 319.9382 | 30.56  | 14.99 | 15.33 | 15.38 | 14.86 | 0.30 |
| 319.9527 | 19.69  | 14.04 | 16.19 | 15.89 | 15.55 | 1.22 |
| 319.9623 | 20.28  | 15.93 | 18.70 | 18.63 | 18.45 | 1.82 |
| 319.9773 | 33.38  | 15.91 | 16.03 | 17.11 | 15.03 | 0.25 |
| 320.0146 | 23.86  | 13.06 | 14.25 | 14.58 | 13.63 | 0.74 |
| 320.0497 | 62.38  | 9.00  | 16.15 | 6.95  | 7.71  | 0.62 |
| 320.0596 | 22     | 16.36 | 15.23 | 16.26 | 16.06 | 0.48 |
| 320.0761 | 24.04  | 15.24 | 18.30 | 18.09 | 17.18 | 1.94 |
| 320.2318 | 107.3  | 22.97 | 21.25 | 22.47 | 23.06 | 0.75 |
| 320.2712 | 267.07 | 18.65 | 17.63 | 17.82 | 17.37 | 0.96 |
| 320.8228 | 73.13  | 20.70 | 21.60 | 21.82 | 21.42 | 1.50 |
| 320.8358 | 93.46  | 15.97 | 14.46 | 15.30 | 15.91 | 1.18 |
| 320.8440 | 91.15  | 16.97 | 17.45 | 17.62 | 17.31 | 1.03 |
| 320.8631 | 94.04  | 14.98 | 13.90 | 14.17 | 14.52 | 0.91 |
| 320.8854 | 55.77  | 18.81 | 19.00 | 15.93 | 18.01 | 0.57 |
| 320.9015 | 42.25  | 22.83 | 23.48 | 23.71 | 23.58 | 1.76 |
| 320.9143 | 31.99  | 13.36 | 12.94 | 14.96 | 12.81 | 0.14 |
| 320.9355 | 27.61  | 15.14 | 15.28 | 15.84 | 14.46 | 0.21 |
| 320.9411 | 48.51  | 15.80 | 15.59 | 15.63 | 15.66 | 0.24 |
| 321.0448 | 25.53  | 20.03 | 20.41 | 19.96 | 19.44 | 0.07 |
| 321.1155 | 31.33  | 15.74 | 12.61 | 13.16 | 13.56 | 1.19 |
| 321.1223 | 212.46 | 14.60 | 8.56  | 8.12  | 8.73  | 1.95 |
| 321.1314 | 23.02  | 16.28 | 16.47 | 16.38 | 16.35 | 0.25 |
| 321.2087 | 208.81 | 21.46 | 21.08 | 21.28 | 21.58 | 0.48 |
| 321.2108 | 290.27 | 16.54 | 16.73 | 18.45 | 16.81 | 0.66 |
| 321.2351 | 94.65  | 19.65 | 17.68 | 19.02 | 19.72 | 0.81 |
| 321.2444 | 239.63 | 18.70 | 17.80 | 18.39 | 18.63 | 0.78 |
| 321.2801 | 291.15 | 17.18 | 16.85 | 16.91 | 17.25 | 0.35 |
| 321.8266 | 83.55  | 15.06 | 15.52 | 15.86 | 15.48 | 0.87 |
| 321.9048 | 43.91  | 17.86 | 18.55 | 18.86 | 18.69 | 1.77 |
| 322.0220 | 26.38  | 17.03 | 17.14 | 16.92 | 16.73 | 0.05 |
| 322.2088 | 225.65 | 18.68 | 18.13 | 18.24 | 18.70 | 0.68 |
| 322.2380 | 100.95 | 15.37 | 12.65 | 14.22 | 15.15 | 0.91 |
| 322.2473 | 144    | 19.32 | 17.00 | 17.67 | 18.45 | 1.26 |
| 322.8214 | 79.96  | 18.72 | 19.55 | 19.82 | 19.46 | 1.42 |
| 322.8387 | 66.33  | 20.93 | 21.50 | 21.97 | 21.59 | 1.38 |
| 322.8513 | 97.62  | 12.61 | 14.15 | 13.83 | 14.25 | 0.71 |
| 322.8628 | 90.5   | 14.86 | 14.64 | 13.93 | 14.57 | 0.50 |
| 322.8786 | 77.8   | 15.91 | 14.88 | 15.74 | 15.60 | 0.91 |
| 322.8939 | 35.73  | 18.38 | 18.34 | 19.14 | 18.11 | 0.25 |
| 322.8996 | 42.74  | 19.79 | 20.39 | 20.66 | 20.53 | 1.75 |
| 322.9052 | 40.33  | 16.40 | 17.28 | 17.34 | 17.11 | 1.82 |
| 322.9145 | 26.89  | 19.29 | 20.49 | 20.59 | 20.43 | 1.58 |
| 322.9555 | 38.54  | 16.49 | 14.02 | 15.11 | 15.36 | 1.00 |
| 322.9774 | 37.26  | 15.96 | 16.07 | 15.66 | 16.23 | 0.02 |
| 323.0296 | 19.26  | 21.85 | 24.33 | 23.92 | 23.36 | 1.58 |
| 323.0487 | 17.88  | 17.17 | 18.75 | 18.85 | 18.61 | 1.66 |
| 323.0788 | 24.81  | 14.67 | 18.19 | 18.51 | 16.86 | 2.07 |
| 323.1022 | 62.97  | 14.88 | 19.51 | 13.50 | 13.91 | 0.72 |
| 323.1383 | 212.52 | 14.60 | 9.54  | 9.58  | 10.32 | 1.67 |
| 323.1466 | 55.06  | 15.96 | 19.13 | 19.26 | 18.94 | 1.76 |
| 323.1692 | 88.82  | 10.16 | 13.97 | 12.86 | 14.86 | 0.89 |
| 323.1902 | 166.23 | 17.61 | 16.75 | 16.45 | 17.75 | 0.70 |
| 323.2218 | 243.64 | 21.48 | 21.80 | 21.88 | 22.15 | 0.85 |
| 323.2507 | 128.95 | 15.01 | 10.65 | 13.30 | 14.72 | 1.00 |

|          |        |       |       |       |       |      |
|----------|--------|-------|-------|-------|-------|------|
| 323.2596 | 177.81 | 20.52 | 19.49 | 20.16 | 20.47 | 0.83 |
| 323.8423 | 76.93  | 15.40 | 15.21 | 15.97 | 15.68 | 0.30 |
| 323.8982 | 29.45  | 13.80 | 14.22 | 14.39 | 13.97 | 0.31 |
| 323.9077 | 24.67  | 15.84 | 16.79 | 16.56 | 16.76 | 1.17 |
| 323.9179 | 33.97  | 13.77 | 14.69 | 15.05 | 14.24 | 0.74 |
| 324.0267 | 17.91  | 13.48 | 14.61 | 14.04 | 13.61 | 0.47 |
| 324.0945 | 18.87  | 20.32 | 21.21 | 21.18 | 21.27 | 1.37 |
| 324.1936 | 168.62 | 14.66 | 13.09 | 13.03 | 14.46 | 0.94 |
| 324.2251 | 246.4  | 18.43 | 18.74 | 18.96 | 19.23 | 0.81 |
| 324.2549 | 156.13 | 15.27 | 14.03 | 14.41 | 14.69 | 1.24 |
| 324.2629 | 169.3  | 18.08 | 16.82 | 17.67 | 17.97 | 0.88 |
| 324.2913 | 197.96 | 16.83 | 16.23 | 16.15 | 16.08 | 0.67 |
| 324.8195 | 85.41  | 14.23 | 15.28 | 15.58 | 15.13 | 0.82 |
| 324.8517 | 98.89  | 14.98 | 14.66 | 14.40 | 14.59 | 0.51 |
| 324.8906 | 48.76  | 17.69 | 19.16 | 19.28 | 18.78 | 1.32 |
| 324.9147 | 151.11 | 18.51 | 16.24 | 15.86 | 17.23 | 1.81 |
| 324.9353 | 50.53  | 18.54 | 18.94 | 19.73 | 19.50 | 1.04 |
| 324.9582 | 33.11  | 16.03 | 15.52 | 15.60 | 15.45 | 0.44 |
| 325.0330 | 22.72  | 18.80 | 18.76 | 18.88 | 19.00 | 0.07 |
| 325.0539 | 57.6   | 16.47 | 16.29 | 17.99 | 17.93 | 0.53 |
| 325.0812 | 47.07  | 14.17 | 20.93 | 12.47 | 12.92 | 0.75 |
| 325.0934 | 153.61 | 20.03 | 19.66 | 19.93 | 20.22 | 0.12 |
| 325.0978 | 19.02  | 16.39 | 17.30 | 17.30 | 17.37 | 1.00 |
| 325.1086 | 17.98  | 15.48 | 15.65 | 15.12 | 15.88 | 0.01 |
| 325.1261 | 26.37  | 16.53 | 17.01 | 16.53 | 16.78 | 0.25 |
| 325.1664 | 285.75 | 14.43 | 20.27 | 18.75 | 20.36 | 1.84 |
| 325.1664 | 172.23 | 15.73 | 14.81 | 15.10 | 14.95 | 0.90 |
| 325.1847 | 286.18 | 21.13 | 22.17 | 22.58 | 21.66 | 1.84 |
| 325.2026 | 182.39 | 16.94 | 15.27 | 15.64 | 15.81 | 1.57 |
| 325.2177 | 206.11 | 20.32 | 19.60 | 20.56 | 20.59 | 0.33 |
| 325.2390 | 248.18 | 22.00 | 22.61 | 22.71 | 22.57 | 1.63 |
| 325.2753 | 202.08 | 18.52 | 18.55 | 19.12 | 19.06 | 0.44 |
| 325.6680 | 285.58 | 14.29 | 18.29 | 17.33 | 18.15 | 1.76 |
| 325.6693 | 177.91 | 9.90  | 11.40 | 12.54 | 8.90  | 0.49 |
| 325.9046 | 28.94  | 13.46 | 14.44 | 13.93 | 14.91 | 0.52 |
| 325.9910 | 31.09  | 13.98 | 14.50 | 14.86 | 14.14 | 0.38 |
| 326.0004 | 31.66  | 13.78 | 16.04 | 16.40 | 14.94 | 1.75 |
| 326.0604 | 23.52  | 13.69 | 15.23 | 16.27 | 15.62 | 1.12 |
| 326.0846 | 65.36  | 15.17 | 17.30 | 14.12 | 14.45 | 0.47 |
| 326.0964 | 19.74  | 18.56 | 20.74 | 20.83 | 19.83 | 1.75 |
| 326.1114 | 35.51  | 16.08 | 16.19 | 15.95 | 15.79 | 0.04 |
| 326.1881 | 287.12 | 17.48 | 18.89 | 19.36 | 18.33 | 1.81 |
| 326.1882 | 162.57 | 20.39 | 21.07 | 20.14 | 21.00 | 0.33 |
| 326.2199 | 200.46 | 17.91 | 17.14 | 18.32 | 18.31 | 0.21 |
| 326.2422 | 247.79 | 19.40 | 20.14 | 20.23 | 20.04 | 1.55 |
| 326.2704 | 297.51 | 12.82 | 13.33 | 14.49 | 13.77 | 0.55 |
| 326.2706 | 164.03 | 16.20 | 14.95 | 15.81 | 15.65 | 1.09 |
| 326.2786 | 211.14 | 15.90 | 16.04 | 15.76 | 15.83 | 0.01 |
| 326.8286 | 60.14  | 17.55 | 16.92 | 17.88 | 17.86 | 0.24 |
| 326.8354 | 60.61  | 15.44 | 15.11 | 15.76 | 15.61 | 0.04 |
| 326.8468 | 56.05  | 17.45 | 15.80 | 17.38 | 17.42 | 0.96 |
| 326.8521 | 166.84 | 13.46 | 18.45 | 18.09 | 17.30 | 1.83 |
| 326.8578 | 75.45  | 15.25 | 14.86 | 14.82 | 15.31 | 0.44 |
| 326.8718 | 226.68 | 16.08 | 14.46 | 15.89 | 16.11 | 0.83 |
| 326.8873 | 226.51 | 13.53 | 11.88 | 14.18 | 14.86 | 0.18 |
| 326.8926 | 83.57  | 14.22 | 13.95 | 15.08 | 14.67 | 0.18 |
| 326.9094 | 153.86 | 16.12 | 14.45 | 13.95 | 15.34 | 1.21 |
| 326.9804 | 18.68  | 17.87 | 19.93 | 19.87 | 19.54 | 1.52 |
| 326.9898 | 19.44  | 17.54 | 20.34 | 20.38 | 19.87 | 1.56 |
| 327.0108 | 23.83  | 16.92 | 15.44 | 15.16 | 16.49 | 0.89 |
| 327.0291 | 30.41  | 16.40 | 13.68 | 14.75 | 15.79 | 1.13 |
| 327.0641 | 27.71  | 16.23 | 14.25 | 14.61 | 14.65 | 1.19 |

|          |        |       |       |       |       |      |
|----------|--------|-------|-------|-------|-------|------|
| 327.0794 | 68.51  | 14.49 | 15.78 | 13.00 | 13.48 | 0.06 |
| 327.1803 | 154.33 | 18.26 | 18.35 | 17.76 | 18.51 | 0.13 |
| 327.1915 | 156.67 | 15.42 | 16.17 | 14.40 | 16.07 | 0.03 |
| 327.2181 | 180.11 | 17.48 | 16.70 | 16.43 | 16.57 | 0.75 |
| 327.2246 | 223.7  | 17.37 | 15.71 | 17.26 | 17.71 | 0.41 |
| 327.2336 | 232.8  | 29.38 | 28.89 | 29.54 | 29.66 | 0.29 |
| 327.2546 | 263.42 | 24.20 | 24.09 | 24.21 | 24.34 | 0.08 |
| 327.2909 | 225.29 | 16.52 | 16.00 | 16.19 | 16.33 | 0.31 |
| 327.4279 | 226.52 | 14.64 | 12.31 | 14.45 | 14.52 | 0.65 |
| 327.4503 | 226.53 | 14.50 | 12.50 | 14.19 | 14.17 | 0.62 |
| 327.5809 | 226.42 | 14.26 | 11.77 | 14.22 | 14.81 | 0.60 |
| 327.5962 | 226.76 | 16.17 | 14.49 | 15.69 | 16.12 | 0.88 |
| 327.9283 | 30.28  | 16.10 | 15.61 | 15.81 | 15.82 | 0.25 |
| 327.9590 | 25.6   | 13.81 | 15.31 | 15.50 | 14.76 | 1.21 |
| 327.9704 | 29.03  | 19.33 | 19.97 | 20.09 | 19.46 | 0.89 |
| 327.9837 | 17.55  | 12.70 | 14.22 | 14.22 | 14.10 | 0.78 |
| 327.9935 | 28.07  | 15.18 | 15.65 | 16.32 | 16.76 | 0.63 |
| 328.0351 | 18.55  | 13.32 | 17.46 | 16.24 | 16.31 | 1.70 |
| 328.0465 | 19.46  | 15.55 | 15.97 | 16.18 | 16.03 | 0.60 |
| 328.0595 | 25.09  | 20.44 | 20.55 | 20.34 | 19.90 | 0.05 |
| 328.0831 | 21.67  | 14.62 | 14.47 | 15.00 | 16.10 | 0.15 |
| 328.1288 | 25.29  | 13.26 | 15.13 | 15.24 | 13.89 | 1.18 |
| 328.2286 | 217.66 | 15.79 | 14.48 | 16.24 | 15.31 | 0.20 |
| 328.2366 | 227.77 | 27.34 | 26.67 | 27.29 | 27.55 | 0.64 |
| 328.2579 | 266.32 | 21.83 | 21.78 | 21.89 | 22.00 | 0.05 |
| 328.8442 | 60.71  | 16.22 | 15.66 | 15.83 | 15.98 | 0.70 |
| 328.8502 | 108.21 | 15.85 | 14.12 | 14.19 | 15.04 | 1.48 |
| 328.8601 | 27.94  | 16.44 | 16.93 | 17.60 | 16.64 | 0.67 |
| 328.8806 | 27.96  | 14.79 | 14.88 | 15.10 | 15.13 | 0.18 |
| 328.9636 | 22.28  | 19.30 | 18.85 | 18.76 | 18.86 | 0.74 |
| 328.9748 | 23.77  | 14.48 | 14.78 | 15.01 | 15.14 | 0.34 |
| 328.9850 | 32.27  | 14.70 | 15.44 | 15.04 | 15.29 | 0.39 |
| 329.0224 | 17.11  | 13.19 | 13.47 | 13.78 | 15.28 | 0.28 |
| 329.0298 | 18.88  | 15.88 | 17.37 | 17.02 | 17.10 | 0.67 |
| 329.0626 | 28.93  | 17.07 | 16.38 | 15.92 | 16.01 | 0.68 |
| 329.2372 | 221.81 | 24.30 | 23.42 | 24.16 | 24.29 | 0.89 |
| 329.2491 | 249.2  | 28.58 | 28.35 | 28.63 | 28.58 | 0.22 |
| 329.2702 | 298.77 | 19.95 | 20.37 | 20.97 | 20.62 | 0.76 |
| 329.9172 | 40.78  | 17.94 | 18.47 | 18.74 | 17.83 | 0.65 |
| 329.9664 | 27.95  | 15.68 | 15.01 | 15.12 | 15.17 | 0.67 |
| 330.0554 | 26.61  | 14.46 | 13.62 | 12.58 | 12.81 | 0.50 |
| 330.2409 | 222.38 | 20.21 | 19.40 | 20.12 | 20.08 | 0.83 |
| 330.2525 | 244.12 | 26.57 | 26.15 | 26.61 | 26.48 | 0.39 |
| 330.2735 | 204.14 | 17.99 | 16.87 | 17.39 | 17.31 | 0.59 |
| 330.5758 | 17.05  | 12.79 | 15.29 | 15.35 | 15.28 | 1.11 |
| 330.8436 | 67.53  | 15.59 | 12.57 | 14.54 | 14.85 | 1.24 |
| 330.8598 | 147.73 | 17.87 | 15.91 | 15.24 | 16.66 | 1.60 |
| 330.8656 | 83.83  | 17.35 | 16.37 | 16.82 | 16.62 | 1.30 |
| 330.8910 | 55.76  | 15.01 | 13.65 | 15.68 | 15.46 | 0.29 |
| 330.8997 | 47.49  | 13.17 | 14.65 | 14.48 | 14.34 | 0.71 |
| 330.9220 | 83.41  | 13.56 | 12.16 | 14.19 | 13.88 | 0.18 |
| 330.9432 | 40.08  | 17.43 | 18.84 | 18.91 | 18.65 | 1.92 |
| 330.9634 | 40.22  | 20.43 | 21.42 | 21.38 | 21.49 | 1.24 |
| 330.9803 | 145.4  | 14.93 | 14.68 | 14.29 | 14.69 | 0.48 |
| 330.9995 | 29.92  | 16.70 | 15.70 | 15.80 | 15.13 | 0.56 |
| 331.0287 | 24.91  | 13.33 | 15.20 | 15.10 | 13.90 | 0.88 |
| 331.0687 | 68.06  | 13.83 | 23.62 | 13.46 | 12.26 | 1.02 |
| 331.0896 | 25.46  | 14.88 | 16.70 | 13.54 | 14.03 | 0.22 |
| 331.1462 | 22.48  | 19.28 | 19.72 | 19.66 | 19.36 | 0.45 |
| 331.2558 | 247.45 | 23.50 | 22.88 | 23.27 | 23.15 | 0.77 |
| 331.2648 | 260.51 | 27.85 | 27.29 | 27.55 | 27.45 | 0.83 |
| 331.9154 | 41.8   | 12.92 | 13.03 | 14.69 | 13.15 | 0.29 |

|          |        |       |       |       |       |      |
|----------|--------|-------|-------|-------|-------|------|
| 331.9234 | 37.66  | 16.69 | 16.55 | 16.73 | 15.87 | 0.11 |
| 331.9676 | 43.74  | 15.73 | 16.71 | 16.74 | 16.91 | 1.06 |
| 332.0598 | 26.08  | 12.40 | 15.47 | 13.55 | 14.05 | 0.84 |
| 332.0721 | 55.79  | 15.62 | 20.44 | 14.55 | 14.93 | 0.83 |
| 332.1737 | 279.15 | 16.47 | 22.15 | 20.79 | 21.75 | 1.85 |
| 332.2581 | 242.59 | 19.21 | 18.62 | 19.07 | 18.87 | 0.50 |
| 332.2680 | 262.37 | 25.76 | 25.10 | 25.51 | 25.33 | 0.82 |
| 332.6759 | 285.27 | 15.30 | 20.58 | 18.68 | 20.23 | 1.67 |
| 332.6769 | 175.35 | 11.82 | 14.73 | 14.52 | 11.67 | 0.73 |
| 332.8570 | 130.75 | 15.65 | 10.74 | 11.46 | 13.08 | 1.75 |
| 332.8754 | 137.19 | 15.69 | 11.97 | 12.00 | 13.19 | 1.54 |
| 332.8822 | 37.2   | 18.89 | 17.32 | 16.89 | 17.34 | 1.21 |
| 332.9017 | 44.39  | 20.27 | 18.65 | 20.27 | 20.03 | 0.77 |
| 332.9226 | 40.34  | 22.69 | 24.44 | 24.54 | 24.38 | 1.84 |
| 332.9592 | 41.64  | 16.79 | 14.55 | 15.28 | 15.73 | 1.07 |
| 332.9692 | 35.15  | 13.68 | 12.94 | 13.31 | 14.29 | 0.26 |
| 332.9824 | 32.07  | 14.80 | 16.09 | 16.53 | 14.91 | 1.24 |
| 333.0088 | 23.92  | 16.50 | 17.50 | 17.55 | 16.89 | 0.69 |
| 333.0250 | 17.17  | 14.67 | 15.90 | 14.84 | 15.44 | 0.53 |
| 333.0312 | 19.96  | 12.87 | 15.14 | 14.82 | 14.01 | 0.91 |
| 333.0667 | 55.84  | 18.34 | 19.47 | 17.89 | 17.94 | 0.52 |
| 333.0730 | 71.57  | 14.56 | 15.34 | 13.11 | 13.57 | 0.34 |
| 333.0950 | 27.9   | 18.77 | 18.32 | 18.96 | 18.68 | 0.15 |
| 333.1719 | 287.64 | 14.90 | 16.85 | 14.68 | 16.95 | 0.68 |
| 333.2073 | 204.1  | 16.48 | 14.40 | 14.60 | 14.27 | 1.15 |
| 333.2716 | 264.26 | 22.53 | 21.73 | 22.12 | 21.94 | 0.97 |
| 333.2803 | 285.59 | 24.22 | 23.35 | 23.63 | 23.68 | 1.01 |
| 333.9050 | 66.95  | 15.34 | 13.01 | 14.15 | 14.90 | 0.94 |
| 333.9157 | 31.27  | 16.88 | 16.53 | 16.67 | 16.15 | 0.21 |
| 333.9259 | 46.73  | 18.29 | 20.10 | 20.18 | 20.03 | 1.89 |
| 333.9365 | 30.18  | 17.22 | 18.28 | 18.31 | 18.05 | 1.59 |
| 333.9543 | 36.5   | 14.42 | 14.44 | 14.16 | 14.07 | 0.08 |
| 334.0086 | 25.24  | 16.34 | 17.02 | 17.20 | 17.08 | 1.05 |
| 334.0257 | 30.76  | 14.09 | 14.87 | 14.84 | 15.14 | 0.52 |
| 334.0502 | 33.38  | 16.20 | 15.12 | 15.17 | 15.52 | 1.06 |
| 334.0640 | 19.37  | 14.23 | 15.41 | 15.16 | 15.12 | 0.84 |
| 334.0983 | 28.82  | 14.95 | 13.61 | 15.00 | 14.41 | 0.35 |
| 334.1277 | 22.57  | 18.51 | 17.85 | 18.16 | 17.83 | 0.87 |
| 334.1513 | 166.79 | 17.62 | 17.13 | 17.49 | 17.72 | 0.33 |
| 334.2091 | 52.15  | 17.92 | 16.19 | 17.07 | 18.17 | 0.72 |
| 334.2742 | 259.92 | 17.65 | 16.24 | 16.97 | 16.75 | 0.92 |
| 334.2836 | 281.7  | 22.05 | 21.16 | 21.46 | 21.49 | 0.98 |
| 334.8124 | 91.81  | 16.63 | 16.26 | 16.49 | 16.47 | 0.65 |
| 334.8390 | 77.86  | 15.41 | 16.22 | 16.40 | 16.17 | 0.95 |
| 334.8599 | 53.6   | 23.42 | 22.94 | 24.12 | 23.83 | 0.15 |
| 334.8802 | 68.47  | 16.06 | 15.80 | 17.23 | 16.80 | 0.56 |
| 334.9185 | 43.21  | 20.26 | 20.35 | 20.57 | 20.68 | 0.46 |
| 334.9269 | 46.15  | 16.16 | 17.62 | 17.75 | 17.61 | 1.79 |
| 335.0242 | 67.7   | 13.86 | 13.95 | 14.46 | 15.22 | 0.19 |
| 335.0501 | 21.21  | 17.36 | 16.32 | 17.47 | 17.61 | 0.31 |
| 335.0617 | 25.46  | 19.87 | 19.27 | 19.63 | 19.62 | 0.52 |
| 335.1900 | 164.43 | 15.40 | 15.18 | 15.27 | 15.16 | 0.17 |
| 335.1902 | 291.32 | 16.22 | 16.94 | 17.15 | 16.14 | 0.59 |
| 335.2206 | 226.46 | 20.47 | 19.07 | 19.04 | 19.44 | 1.27 |
| 335.2234 | 38.56  | 18.61 | 17.43 | 17.39 | 18.95 | 0.40 |
| 335.2598 | 175.41 | 15.45 | 14.50 | 14.02 | 14.99 | 0.90 |
| 335.2869 | 282.65 | 18.41 | 17.29 | 17.55 | 17.71 | 1.11 |
| 335.8634 | 62.07  | 18.69 | 18.24 | 19.32 | 19.04 | 0.13 |
| 335.9128 | 31.71  | 15.05 | 14.14 | 14.64 | 14.06 | 0.37 |
| 335.9240 | 46.9   | 13.84 | 15.31 | 15.19 | 14.96 | 1.19 |
| 335.9514 | 35.17  | 15.47 | 14.50 | 15.39 | 14.76 | 0.43 |
| 336.0217 | 71.29  | 15.21 | 15.75 | 16.42 | 16.69 | 0.73 |

|          |        |       |       |       |       |      |
|----------|--------|-------|-------|-------|-------|------|
| 336.0647 | 28.33  | 16.53 | 16.90 | 16.29 | 16.60 | 0.13 |
| 336.2240 | 225.23 | 17.46 | 15.79 | 15.36 | 16.11 | 1.27 |
| 336.2268 | 45.48  | 16.08 | 13.81 | 14.65 | 16.57 | 0.71 |
| 336.2550 | 149    | 16.80 | 15.47 | 16.79 | 16.58 | 0.80 |
| 336.8101 | 93.68  | 15.40 | 15.25 | 15.59 | 15.65 | 0.04 |
| 336.8182 | 80.32  | 15.90 | 17.16 | 17.35 | 16.95 | 1.57 |
| 336.8372 | 89.68  | 13.41 | 13.08 | 13.86 | 13.66 | 0.04 |
| 336.8484 | 100.57 | 13.60 | 13.38 | 13.97 | 13.56 | 0.03 |
| 336.8621 | 55.71  | 17.14 | 18.00 | 17.92 | 19.41 | 0.34 |
| 336.8755 | 49.23  | 22.86 | 23.08 | 23.74 | 23.55 | 1.24 |
| 336.8884 | 22.3   | 15.42 | 15.98 | 15.46 | 15.99 | 0.23 |
| 336.9095 | 29.94  | 15.67 | 14.74 | 15.33 | 14.27 | 0.51 |
| 336.9153 | 51.07  | 16.92 | 16.40 | 16.83 | 16.85 | 0.73 |
| 336.9303 | 34.61  | 15.16 | 15.17 | 15.35 | 15.71 | 0.10 |
| 336.9735 | 17.01  | 15.69 | 17.53 | 17.55 | 17.23 | 1.47 |
| 337.0185 | 29.77  | 15.93 | 17.28 | 16.70 | 17.26 | 0.82 |
| 337.0403 | 32.04  | 16.53 | 16.50 | 16.06 | 16.06 | 0.19 |
| 337.0568 | 18.33  | 14.38 | 15.89 | 15.67 | 16.08 | 1.08 |
| 337.0787 | 19.33  | 17.24 | 17.61 | 17.67 | 17.80 | 0.66 |
| 337.1392 | 54.47  | 13.27 | 19.96 | 11.57 | 11.79 | 0.74 |
| 337.1791 | 226.05 | 19.73 | 19.90 | 20.14 | 20.04 | 0.52 |
| 337.1934 | 229.19 | 17.70 | 16.53 | 16.19 | 17.87 | 0.90 |
| 337.2051 | 172.72 | 18.42 | 18.49 | 18.23 | 18.84 | 0.01 |
| 337.2058 | 288.85 | 16.57 | 17.54 | 18.25 | 17.23 | 1.29 |
| 337.2366 | 263.28 | 21.76 | 21.29 | 21.32 | 21.60 | 1.22 |
| 337.8615 | 65.44  | 15.95 | 14.29 | 16.20 | 16.01 | 0.82 |
| 337.8789 | 56.64  | 18.07 | 18.15 | 18.98 | 18.77 | 1.04 |
| 337.9959 | 26.2   | 14.45 | 15.09 | 14.58 | 14.90 | 0.25 |
| 338.0174 | 22.71  | 15.08 | 15.39 | 15.85 | 16.64 | 0.61 |
| 338.0373 | 55.57  | 15.06 | 16.02 | 16.77 | 16.08 | 1.19 |
| 338.0499 | 16.79  | 13.55 | 16.70 | 16.86 | 16.70 | 1.63 |
| 338.0674 | 17.9   | 17.78 | 18.54 | 18.43 | 18.48 | 0.84 |
| 338.0740 | 24.19  | 14.34 | 15.52 | 14.78 | 15.25 | 0.70 |
| 338.1425 | 65.04  | 13.94 | 16.47 | 12.16 | 12.75 | 0.25 |
| 338.1822 | 228.52 | 16.83 | 16.46 | 16.70 | 16.68 | 0.30 |
| 338.1979 | 189.4  | 17.21 | 16.53 | 16.84 | 16.80 | 1.17 |
| 338.2094 | 170.89 | 15.73 | 15.48 | 15.13 | 16.01 | 0.30 |
| 338.2400 | 257.83 | 18.82 | 18.17 | 18.25 | 18.60 | 1.31 |
| 338.2708 | 187.51 | 18.02 | 17.13 | 17.72 | 17.43 | 1.08 |
| 338.8158 | 89.01  | 14.52 | 14.73 | 15.04 | 14.82 | 0.29 |
| 338.8367 | 79.44  | 15.53 | 15.89 | 16.44 | 16.48 | 1.01 |
| 338.8466 | 84.57  | 16.15 | 15.47 | 16.00 | 16.37 | 0.56 |
| 338.8559 | 64.66  | 16.49 | 14.87 | 16.91 | 16.69 | 0.69 |
| 338.8677 | 39.67  | 18.33 | 17.74 | 18.56 | 17.87 | 0.24 |
| 338.8736 | 49.77  | 20.46 | 20.64 | 21.35 | 21.17 | 1.23 |
| 338.8796 | 42.25  | 16.42 | 17.12 | 17.23 | 16.95 | 1.67 |
| 338.8883 | 37.87  | 19.84 | 20.83 | 20.94 | 20.80 | 1.59 |
| 338.9301 | 43.91  | 15.80 | 8.99  | 9.93  | 12.78 | 1.65 |
| 338.9302 | 153.06 | 17.11 | 12.20 | 11.83 | 14.34 | 1.97 |
| 338.9507 | 45.67  | 15.11 | 11.53 | 11.65 | 13.30 | 1.25 |
| 338.9897 | 19.41  | 23.55 | 27.03 | 27.12 | 26.49 | 1.98 |
| 339.0642 | 22.31  | 17.06 | 18.39 | 18.22 | 17.95 | 1.47 |
| 339.1819 | 291.72 | 13.55 | 18.62 | 17.92 | 17.78 | 1.89 |
| 339.1964 | 263.73 | 20.38 | 20.77 | 21.00 | 20.80 | 1.08 |
| 339.1999 | 169.4  | 20.67 | 20.91 | 20.19 | 20.94 | 0.04 |
| 339.2099 | 239.26 | 20.93 | 20.10 | 20.37 | 20.97 | 1.09 |
| 339.2159 | 153.9  | 14.83 | 10.73 | 13.37 | 13.52 | 1.10 |
| 339.2159 | 55.38  | 14.66 | 10.33 | 14.11 | 14.62 | 0.85 |
| 339.2355 | 237.82 | 17.23 | 15.40 | 13.33 | 15.23 | 1.01 |
| 339.2545 | 176.82 | 15.67 | 14.43 | 14.67 | 14.79 | 1.35 |
| 339.2737 | 174.06 | 15.45 | 13.35 | 14.33 | 14.58 | 1.43 |
| 339.6836 | 289.7  | 13.71 | 16.95 | 15.48 | 16.39 | 1.30 |



|          |        |       |       |       |       |      |
|----------|--------|-------|-------|-------|-------|------|
| 339.8784 | 45.17  | 16.10 | 15.11 | 15.94 | 16.20 | 0.72 |
| 339.8917 | 35.01  | 13.84 | 15.26 | 15.07 | 14.97 | 1.08 |
| 339.9931 | 19.84  | 19.41 | 23.00 | 23.17 | 22.41 | 2.00 |
| 340.0439 | 27.49  | 14.51 | 13.78 | 14.61 | 14.60 | 0.18 |
| 340.1441 | 28.33  | 17.75 | 17.74 | 17.59 | 17.33 | 0.12 |
| 340.2031 | 169.13 | 18.28 | 18.63 | 17.96 | 18.55 | 0.09 |
| 340.2138 | 234.95 | 18.27 | 17.24 | 17.62 | 18.32 | 1.03 |
| 340.2319 | 181.62 | 13.17 | 13.31 | 13.85 | 12.93 | 0.21 |
| 340.2861 | 182.32 | 16.38 | 15.69 | 16.10 | 15.75 | 0.88 |
| 340.8049 | 59.04  | 17.84 | 17.84 | 18.63 | 18.56 | 0.69 |
| 340.8163 | 90.13  | 15.00 | 15.42 | 15.98 | 15.48 | 1.18 |
| 340.8260 | 85.23  | 15.39 | 15.16 | 15.48 | 15.74 | 0.08 |
| 340.8523 | 87.49  | 14.54 | 14.00 | 14.08 | 14.56 | 0.45 |
| 340.8647 | 49.68  | 18.01 | 18.14 | 18.55 | 18.64 | 0.33 |
| 340.8714 | 56.61  | 16.08 | 15.63 | 16.73 | 16.52 | 0.17 |
| 340.8814 | 93.51  | 14.53 | 14.14 | 13.83 | 14.70 | 0.41 |
| 340.8883 | 50.43  | 18.50 | 17.08 | 16.83 | 16.95 | 1.19 |
| 340.9091 | 48.38  | 16.89 | 16.71 | 18.36 | 18.11 | 0.66 |
| 340.9461 | 38.37  | 13.07 | 12.60 | 11.63 | 13.02 | 0.19 |
| 340.9940 | 18.9   | 17.82 | 21.32 | 21.56 | 20.96 | 2.04 |
| 341.0055 | 17.33  | 16.92 | 16.43 | 16.28 | 16.44 | 0.49 |
| 341.0128 | 27.04  | 13.02 | 14.50 | 14.01 | 15.04 | 0.78 |
| 341.0286 | 44.81  | 16.23 | 16.04 | 18.11 | 18.18 | 0.62 |
| 341.0400 | 19.53  | 17.02 | 17.88 | 18.31 | 18.18 | 1.07 |
| 341.1094 | 137.64 | 17.82 | 17.48 | 17.63 | 17.06 | 0.40 |
| 341.1795 | 164.8  | 14.37 | 13.16 | 13.40 | 13.03 | 0.69 |
| 341.1961 | 175.17 | 16.25 | 16.17 | 15.39 | 16.34 | 0.39 |
| 341.2073 | 233.52 | 18.88 | 18.03 | 18.27 | 18.97 | 0.90 |
| 341.2258 | 251.55 | 17.95 | 16.59 | 16.86 | 17.59 | 1.37 |
| 341.2345 | 169.36 | 16.25 | 16.27 | 16.40 | 15.73 | 0.00 |
| 341.2701 | 277.6  | 18.05 | 18.35 | 18.62 | 18.67 | 0.63 |
| 341.2884 | 285.29 | 15.79 | 16.33 | 15.98 | 16.00 | 0.21 |
| 341.2893 | 190.43 | 15.07 | 12.93 | 13.01 | 13.47 | 1.20 |
| 341.9442 | 20.08  | 17.81 | 18.82 | 19.15 | 19.11 | 1.25 |
| 341.9652 | 32.29  | 13.26 | 14.43 | 14.03 | 13.24 | 0.51 |
| 341.9745 | 32.09  | 13.03 | 14.39 | 14.66 | 13.10 | 0.95 |
| 341.9860 | 34.11  | 16.19 | 15.55 | 15.52 | 15.48 | 0.93 |
| 342.0885 | 59.01  | 17.68 | 18.70 | 19.42 | 18.67 | 1.03 |
| 342.2475 | 209.94 | 17.55 | 16.37 | 17.55 | 16.65 | 0.43 |
| 342.2654 | 160.06 | 16.29 | 15.90 | 16.16 | 15.92 | 0.56 |
| 342.2734 | 206.09 | 15.75 | 15.90 | 15.45 | 16.25 | 0.01 |
| 342.8027 | 71.69  | 16.54 | 16.06 | 17.26 | 17.18 | 0.18 |
| 342.8211 | 63.95  | 15.86 | 14.39 | 16.13 | 16.29 | 0.47 |
| 342.8317 | 74.92  | 14.77 | 14.42 | 15.95 | 15.49 | 0.45 |
| 342.8626 | 83.49  | 14.00 | 15.07 | 15.72 | 15.64 | 1.01 |
| 342.8842 | 98.93  | 16.86 | 14.84 | 15.14 | 15.53 | 1.61 |
| 342.9042 | 149.64 | 16.26 | 15.80 | 15.57 | 16.23 | 0.38 |
| 342.9045 | 54.24  | 19.21 | 19.17 | 18.52 | 18.58 | 0.39 |
| 342.9222 | 34.27  | 13.15 | 14.81 | 15.02 | 13.90 | 1.10 |
| 342.9846 | 49.6   | 15.08 | 10.12 | 9.63  | 12.29 | 1.50 |
| 343.0116 | 19.61  | 16.24 | 17.50 | 17.20 | 16.95 | 1.33 |
| 343.0543 | 20.04  | 15.34 | 15.38 | 15.78 | 15.97 | 0.19 |
| 343.0917 | 111.3  | 12.45 | 15.56 | 15.32 | 16.14 | 1.39 |
| 343.1895 | 181.11 | 15.94 | 11.60 | 12.54 | 13.84 | 1.74 |
| 343.2131 | 165.2  | 16.39 | 16.10 | 16.56 | 15.80 | 0.25 |
| 343.2285 | 108.88 | 22.12 | 20.48 | 21.80 | 22.25 | 0.75 |
| 343.2502 | 202.98 | 18.21 | 17.61 | 18.47 | 17.35 | 0.26 |
| 343.2647 | 259.24 | 19.17 | 18.18 | 18.64 | 18.11 | 1.04 |
| 343.2859 | 180.56 | 14.81 | 13.62 | 13.03 | 13.20 | 0.88 |
| 343.9443 | 30.97  | 19.37 | 19.37 | 19.80 | 18.96 | 0.10 |
| 343.9676 | 46.18  | 14.49 | 12.18 | 11.98 | 15.32 | 0.92 |
| 343.9748 | 33.41  | 13.14 | 14.35 | 14.80 | 13.42 | 0.91 |

|          |        |       |       |       |       |      |
|----------|--------|-------|-------|-------|-------|------|
| 343.9959 | 22.18  | 16.41 | 16.39 | 16.24 | 16.96 | 0.00 |
| 344.0329 | 101.9  | 16.19 | 15.08 | 15.26 | 16.88 | 0.50 |
| 344.1361 | 27.13  | 14.66 | 14.23 | 13.89 | 14.77 | 0.24 |
| 344.1382 | 289.85 | 16.45 | 12.10 | 12.18 | 13.35 | 1.50 |
| 344.1545 | 28.64  | 15.63 | 15.68 | 15.73 | 15.76 | 0.05 |
| 344.2317 | 157.56 | 17.77 | 14.68 | 15.56 | 15.57 | 1.28 |
| 344.2542 | 208.58 | 15.86 | 14.95 | 15.24 | 14.37 | 0.46 |
| 344.2684 | 254.08 | 16.46 | 14.88 | 15.45 | 14.82 | 1.10 |
| 344.2815 | 235.79 | 18.92 | 19.25 | 19.41 | 19.67 | 0.47 |
| 344.8203 | 59.05  | 15.37 | 12.76 | 15.21 | 15.56 | 0.93 |
| 344.8336 | 29.16  | 15.07 | 14.66 | 16.41 | 14.60 | 0.09 |
| 344.8418 | 91.38  | 20.61 | 20.69 | 20.64 | 20.53 | 0.11 |
| 344.8544 | 31.64  | 14.43 | 14.47 | 15.11 | 14.94 | 0.21 |
| 344.8958 | 28.07  | 16.82 | 17.93 | 18.16 | 17.20 | 0.89 |
| 344.9025 | 45.87  | 14.94 | 14.10 | 13.90 | 13.71 | 0.38 |
| 344.9376 | 22.96  | 17.73 | 15.47 | 15.52 | 15.78 | 1.13 |
| 344.9589 | 40.52  | 14.91 | 15.05 | 15.25 | 15.25 | 0.21 |
| 344.9681 | 26.3   | 15.65 | 17.47 | 17.61 | 16.93 | 1.76 |
| 344.9795 | 146.65 | 16.34 | 15.43 | 15.52 | 16.42 | 0.92 |
| 344.9798 | 45.79  | 18.02 | 17.85 | 17.92 | 18.16 | 0.10 |
| 345.0239 | 16.98  | 16.90 | 18.67 | 18.47 | 18.48 | 1.37 |
| 345.0843 | 65.01  | 16.48 | 17.91 | 15.80 | 15.96 | 0.44 |
| 345.1064 | 18.45  | 13.92 | 16.45 | 16.05 | 15.30 | 1.24 |
| 345.1326 | 26.41  | 12.63 | 8.45  | 7.85  | 10.31 | 0.98 |
| 345.2051 | 216.72 | 19.84 | 19.37 | 19.79 | 20.25 | 0.36 |
| 345.2079 | 84.38  | 16.13 | 14.80 | 15.52 | 16.20 | 0.53 |
| 345.2287 | 205.02 | 14.79 | 14.87 | 14.65 | 14.94 | 0.00 |
| 345.2353 | 96.35  | 16.30 | 13.83 | 15.95 | 16.54 | 0.75 |
| 345.2440 | 150.37 | 21.81 | 20.14 | 20.99 | 21.01 | 1.10 |
| 345.8451 | 90.71  | 14.76 | 13.79 | 14.08 | 13.99 | 0.95 |
| 345.8911 | 53.4   | 16.60 | 16.04 | 18.00 | 17.25 | 0.35 |
| 345.9156 | 26.24  | 13.47 | 14.28 | 14.78 | 14.83 | 0.74 |
| 345.9427 | 34.79  | 15.06 | 14.67 | 14.63 | 14.43 | 0.34 |
| 345.9749 | 35.17  | 15.57 | 16.01 | 16.31 | 15.95 | 0.84 |
| 346.0568 | 19.37  | 22.92 | 25.61 | 24.80 | 24.39 | 1.49 |
| 346.1281 | 23.59  | 19.42 | 20.28 | 20.39 | 19.97 | 1.24 |
| 346.2085 | 212.95 | 17.13 | 16.44 | 16.97 | 17.57 | 0.51 |
| 346.2473 | 153.57 | 19.88 | 17.96 | 18.95 | 18.86 | 1.26 |
| 346.2871 | 273.3  | 19.27 | 18.15 | 18.48 | 18.38 | 1.41 |
| 346.8337 | 99.79  | 18.26 | 16.47 | 16.54 | 17.24 | 1.56 |
| 346.8671 | 74.4   | 15.86 | 15.60 | 16.93 | 16.76 | 0.43 |
| 346.8944 | 56.43  | 15.01 | 15.32 | 15.98 | 15.20 | 0.39 |
| 346.9138 | 36.99  | 16.32 | 16.21 | 16.81 | 14.95 | 0.02 |
| 346.9381 | 41.04  | 21.03 | 21.77 | 21.90 | 21.91 | 1.36 |
| 346.9649 | 26.41  | 13.45 | 14.94 | 15.26 | 15.01 | 1.36 |
| 347.0008 | 20.56  | 18.73 | 20.38 | 20.23 | 19.94 | 1.74 |
| 347.0308 | 16.78  | 12.89 | 14.13 | 14.75 | 13.53 | 0.81 |
| 347.0410 | 27.37  | 22.29 | 26.16 | 25.97 | 24.99 | 1.73 |
| 347.1037 | 18.14  | 13.61 | 16.19 | 15.41 | 14.96 | 0.84 |
| 347.1335 | 22.6   | 15.67 | 16.64 | 16.84 | 16.39 | 0.92 |
| 347.1719 | 215.17 | 17.79 | 19.57 | 19.58 | 18.49 | 1.68 |
| 347.1846 | 39.32  | 17.30 | 16.31 | 17.03 | 18.10 | 0.32 |
| 347.2211 | 236.97 | 22.20 | 21.97 | 22.17 | 22.50 | 0.23 |
| 347.2447 | 223.36 | 17.44 | 16.87 | 16.36 | 16.92 | 0.71 |
| 347.2597 | 179.45 | 22.22 | 20.72 | 21.57 | 21.69 | 1.09 |
| 347.8883 | 57.2   | 11.94 | 10.57 | 13.20 | 11.85 | 0.08 |
| 347.9416 | 47.08  | 16.48 | 17.24 | 17.40 | 17.41 | 1.23 |
| 348.0237 | 28.37  | 14.13 | 15.52 | 15.89 | 14.85 | 1.71 |
| 348.0379 | 17.78  | 15.08 | 18.43 | 18.43 | 17.67 | 1.78 |
| 348.0443 | 22.91  | 18.80 | 22.79 | 22.49 | 21.63 | 1.78 |
| 348.0610 | 18.33  | 15.90 | 18.70 | 17.57 | 17.39 | 1.25 |
| 348.0880 | 18.23  | 16.47 | 17.31 | 16.81 | 16.91 | 0.52 |

|          |        |       |       |       |       |      |
|----------|--------|-------|-------|-------|-------|------|
| 348.1750 | 215.61 | 14.01 | 15.78 | 15.78 | 14.59 | 1.37 |
| 348.1880 | 39.56  | 14.49 | 13.21 | 13.39 | 14.98 | 0.57 |
| 348.2245 | 238.98 | 19.74 | 19.40 | 19.64 | 19.97 | 0.45 |
| 348.2631 | 176.58 | 20.09 | 18.45 | 19.40 | 19.50 | 1.14 |
| 348.3025 | 299.5  | 15.92 | 15.55 | 16.36 | 15.61 | 0.04 |
| 348.8312 | 111.99 | 16.13 | 14.10 | 14.43 | 14.70 | 1.57 |
| 348.8493 | 109.96 | 16.23 | 12.76 | 11.09 | 13.18 | 1.29 |
| 348.8546 | 56.8   | 18.13 | 18.36 | 19.37 | 19.23 | 0.88 |
| 348.8756 | 59.06  | 20.49 | 19.17 | 20.65 | 20.52 | 0.79 |
| 348.8965 | 49.61  | 23.06 | 24.32 | 24.66 | 24.46 | 1.90 |
| 348.9067 | 17.75  | 14.80 | 17.21 | 17.24 | 16.65 | 1.77 |
| 348.9353 | 46.23  | 17.27 | 17.10 | 17.27 | 17.39 | 0.12 |
| 348.9431 | 41.15  | 15.36 | 15.16 | 15.36 | 15.45 | 0.11 |
| 348.9562 | 33.2   | 14.00 | 14.37 | 15.32 | 12.92 | 0.26 |
| 348.9748 | 27.95  | 14.64 | 13.80 | 15.37 | 16.09 | 0.03 |
| 349.0001 | 20.93  | 15.82 | 16.92 | 17.18 | 16.09 | 0.71 |
| 349.0248 | 24.02  | 16.22 | 16.75 | 17.08 | 16.95 | 0.58 |
| 349.0444 | 30.32  | 16.10 | 20.65 | 19.46 | 18.53 | 1.63 |
| 349.0550 | 17.7   | 13.98 | 15.47 | 13.90 | 14.49 | 0.51 |
| 349.0613 | 44.85  | 14.95 | 15.91 | 16.08 | 14.97 | 0.55 |
| 349.1685 | 219.48 | 9.10  | 13.54 | 13.33 | 11.19 | 1.38 |
| 349.2057 | 226.49 | 19.01 | 17.59 | 17.67 | 18.32 | 1.43 |
| 349.2370 | 262.19 | 21.44 | 21.49 | 21.60 | 22.02 | 0.33 |
| 349.2659 | 176.38 | 16.18 | 13.55 | 15.10 | 15.63 | 1.00 |
| 349.2751 | 275.56 | 20.14 | 19.40 | 20.10 | 20.20 | 0.43 |
| 349.8789 | 71.7   | 15.48 | 14.20 | 14.88 | 14.78 | 1.04 |
| 349.8998 | 43.31  | 18.66 | 19.97 | 20.29 | 20.13 | 1.89 |
| 349.9104 | 31.41  | 16.89 | 17.17 | 17.27 | 17.04 | 0.34 |
| 349.9989 | 34.5   | 14.82 | 14.46 | 14.71 | 15.08 | 0.14 |
| 350.0176 | 27.82  | 16.68 | 15.91 | 15.85 | 16.28 | 1.15 |
| 350.0242 | 29.99  | 16.53 | 15.72 | 15.84 | 15.88 | 0.86 |
| 350.0320 | 24.54  | 15.14 | 14.55 | 14.62 | 14.82 | 0.29 |
| 350.0438 | 31.98  | 15.08 | 17.60 | 16.38 | 14.90 | 1.06 |
| 350.0583 | 42.42  | 14.63 | 17.29 | 17.74 | 15.89 | 1.45 |
| 350.0727 | 30.46  | 16.47 | 16.37 | 16.88 | 16.43 | 0.11 |
| 350.0802 | 27.96  | 15.80 | 13.40 | 14.84 | 14.37 | 1.15 |
| 350.1557 | 27.19  | 18.43 | 17.54 | 17.97 | 17.62 | 1.09 |
| 350.2401 | 264.99 | 18.85 | 18.29 | 18.66 | 19.23 | 0.47 |
| 350.2786 | 273.15 | 17.43 | 16.61 | 17.12 | 17.04 | 0.27 |
| 350.7869 | 82.84  | 15.78 | 15.96 | 16.20 | 16.14 | 0.52 |
| 350.8339 | 55.93  | 22.29 | 22.46 | 23.30 | 23.00 | 1.00 |
| 350.8434 | 43.96  | 14.29 | 13.42 | 14.34 | 12.90 | 0.37 |
| 350.8469 | 62.42  | 13.96 | 8.46  | 9.00  | 10.71 | 1.37 |
| 350.8545 | 61.27  | 18.47 | 18.30 | 19.26 | 18.94 | 0.53 |
| 350.8929 | 44.89  | 20.65 | 21.39 | 21.75 | 21.64 | 1.76 |
| 350.9008 | 47.59  | 16.21 | 17.17 | 17.34 | 17.15 | 1.81 |
| 350.9462 | 30.43  | 14.83 | 14.56 | 15.39 | 14.56 | 0.05 |
| 350.9983 | 68.74  | 15.32 | 15.79 | 16.74 | 17.14 | 0.91 |
| 351.0388 | 31.88  | 17.34 | 16.61 | 16.95 | 16.87 | 0.52 |
| 351.0580 | 18.43  | 18.11 | 19.50 | 19.32 | 19.40 | 1.36 |
| 351.1947 | 226.45 | 18.75 | 18.01 | 18.26 | 18.13 | 0.78 |
| 351.2189 | 25.31  | 21.31 | 20.55 | 21.04 | 22.10 | 0.27 |
| 351.2213 | 264.55 | 21.57 | 21.62 | 21.65 | 21.90 | 0.15 |
| 351.2215 | 183.16 | 16.88 | 16.48 | 16.91 | 16.43 | 0.21 |
| 351.2524 | 45.58  | 15.84 | 15.36 | 15.72 | 16.01 | 0.27 |
| 351.2533 | 278.57 | 19.14 | 19.14 | 19.66 | 19.43 | 0.42 |
| 351.8373 | 56.34  | 17.39 | 17.00 | 18.51 | 18.15 | 0.44 |
| 351.8978 | 49.52  | 15.41 | 16.30 | 16.58 | 16.44 | 1.48 |
| 351.9956 | 62.37  | 16.03 | 17.95 | 18.39 | 17.96 | 1.42 |
| 352.0613 | 17.88  | 14.72 | 15.65 | 15.50 | 15.73 | 0.67 |
| 352.2222 | 23.15  | 18.79 | 17.69 | 18.37 | 19.38 | 0.35 |
| 352.2250 | 259.33 | 18.06 | 17.73 | 17.65 | 17.17 | 0.28 |

|          |        |       |       |       |       |      |
|----------|--------|-------|-------|-------|-------|------|
| 352.2563 | 288.07 | 16.13 | 15.21 | 15.85 | 15.58 | 0.67 |
| 352.2861 | 177.59 | 15.06 | 12.46 | 14.03 | 13.95 | 1.33 |
| 352.7845 | 94.94  | 13.82 | 14.78 | 14.67 | 14.58 | 0.47 |
| 352.8222 | 93.47  | 13.32 | 13.83 | 13.90 | 13.99 | 0.53 |
| 352.8321 | 55.75  | 20.39 | 20.46 | 21.38 | 21.08 | 0.88 |
| 352.8390 | 38.6   | 12.28 | 14.11 | 8.04  | 10.02 | 0.26 |
| 352.8495 | 50.82  | 21.70 | 21.81 | 22.76 | 22.50 | 0.95 |
| 352.8659 | 141.32 | 14.69 | 14.13 | 13.59 | 14.86 | 0.40 |
| 352.8835 | 40.95  | 14.63 | 12.50 | 14.47 | 14.20 | 0.40 |
| 352.8894 | 57.57  | 17.33 | 16.02 | 17.40 | 17.34 | 0.88 |
| 352.9042 | 38.99  | 15.91 | 15.39 | 15.61 | 15.83 | 0.58 |
| 352.9457 | 31.79  | 14.67 | 13.09 | 12.47 | 13.88 | 0.54 |
| 352.9981 | 25.91  | 15.06 | 13.66 | 12.53 | 14.98 | 0.58 |
| 353.0137 | 43.43  | 13.46 | 14.15 | 15.94 | 16.25 | 0.68 |
| 353.0353 | 23.57  | 16.00 | 15.69 | 15.12 | 14.45 | 0.34 |
| 353.0530 | 197.13 | 13.67 | 13.98 | 14.30 | 13.35 | 0.28 |
| 353.0971 | 22.69  | 16.95 | 18.10 | 18.52 | 17.75 | 1.37 |
| 353.1128 | 55.37  | 14.98 | 21.39 | 13.71 | 13.96 | 0.86 |
| 353.1339 | 29.16  | 13.34 | 16.22 | 11.25 | 11.94 | 0.22 |
| 353.1508 | 28.22  | 16.41 | 16.77 | 16.80 | 16.14 | 0.30 |
| 353.1601 | 202.72 | 15.29 | 15.35 | 15.69 | 15.63 | 0.16 |
| 353.1660 | 247.9  | 16.19 | 16.68 | 16.87 | 16.89 | 0.43 |
| 353.1743 | 75.3   | 14.49 | 13.85 | 14.15 | 14.69 | 0.33 |
| 353.2007 | 289.97 | 17.49 | 19.10 | 19.71 | 18.04 | 1.74 |
| 353.2009 | 161.12 | 18.88 | 19.13 | 18.71 | 19.73 | 0.16 |
| 353.2116 | 264.06 | 20.25 | 20.21 | 20.39 | 20.15 | 0.06 |
| 353.2154 | 173.74 | 17.71 | 18.54 | 17.86 | 18.50 | 0.59 |
| 353.2254 | 26.67  | 14.80 | 12.79 | 13.43 | 15.46 | 0.74 |
| 353.2344 | 81.46  | 15.20 | 11.30 | 13.82 | 14.86 | 1.01 |
| 353.2344 | 21.72  | 19.63 | 18.38 | 18.99 | 20.23 | 0.54 |
| 353.2353 | 176.42 | 14.82 | 14.80 | 15.00 | 13.66 | 0.08 |
| 353.2700 | 273.58 | 19.09 | 18.67 | 19.03 | 18.99 | 0.34 |
| 353.2703 | 191    | 15.60 | 13.91 | 14.36 | 14.87 | 1.49 |
| 353.2818 | 260.7  | 17.71 | 16.97 | 17.19 | 17.02 | 0.67 |
| 353.3068 | 274.61 | 17.28 | 18.11 | 18.36 | 17.80 | 0.64 |
| 353.8355 | 67.25  | 15.25 | 14.32 | 16.11 | 15.73 | 0.06 |
| 353.8529 | 58.77  | 16.82 | 16.20 | 17.92 | 17.58 | 0.25 |
| 354.0086 | 30.33  | 15.04 | 15.01 | 15.37 | 15.47 | 0.07 |
| 354.0279 | 20.63  | 18.01 | 19.64 | 19.69 | 19.45 | 1.87 |
| 354.0735 | 20.53  | 21.21 | 22.59 | 22.60 | 22.27 | 1.68 |
| 354.1165 | 63.6   | 16.82 | 18.28 | 16.24 | 16.36 | 0.55 |
| 354.2041 | 153.05 | 16.18 | 16.22 | 15.65 | 16.95 | 0.08 |
| 354.2150 | 257.97 | 17.17 | 17.18 | 17.38 | 16.97 | 0.13 |
| 354.2189 | 166.84 | 15.03 | 15.84 | 14.85 | 15.89 | 0.34 |
| 354.2378 | 25.64  | 17.06 | 14.79 | 15.98 | 17.55 | 0.72 |
| 354.2477 | 199.47 | 15.07 | 15.48 | 16.42 | 14.85 | 0.44 |
| 354.3018 | 180.24 | 15.42 | 14.09 | 15.50 | 14.96 | 0.65 |
| 354.8107 | 87.73  | 15.42 | 16.10 | 16.53 | 16.48 | 1.38 |
| 354.8205 | 85.34  | 15.11 | 14.02 | 14.86 | 15.09 | 0.78 |
| 354.8303 | 56.97  | 16.75 | 15.91 | 17.76 | 17.40 | 0.08 |
| 354.8417 | 48.12  | 17.68 | 16.17 | 17.16 | 16.70 | 0.95 |
| 354.8498 | 42.53  | 19.70 | 19.49 | 20.76 | 20.51 | 0.55 |
| 354.8628 | 43.95  | 20.39 | 20.35 | 20.51 | 20.81 | 0.13 |
| 354.8814 | 41.31  | 12.90 | 11.38 | 12.44 | 11.91 | 0.37 |
| 354.9041 | 161.3  | 18.06 | 16.15 | 15.77 | 16.94 | 1.68 |
| 354.9255 | 33.01  | 20.12 | 22.01 | 21.63 | 21.67 | 1.45 |
| 354.9660 | 33.23  | 16.07 | 13.62 | 13.27 | 14.38 | 1.19 |
| 354.9961 | 26.03  | 16.29 | 17.19 | 17.25 | 16.49 | 0.74 |
| 355.0314 | 21.29  | 15.28 | 15.34 | 15.53 | 15.34 | 0.09 |
| 355.0679 | 20.88  | 15.11 | 14.54 | 14.91 | 14.71 | 0.28 |
| 355.0771 | 17.64  | 17.33 | 18.78 | 18.88 | 18.50 | 1.69 |
| 355.1105 | 173.15 | 14.55 | 15.25 | 15.16 | 14.01 | 0.50 |

|          |        |       |       |       |       |      |
|----------|--------|-------|-------|-------|-------|------|
| 355.1110 | 64.98  | 7.51  | 16.84 | 8.25  | 7.72  | 1.18 |
| 355.2505 | 196.1  | 15.74 | 16.67 | 16.93 | 14.39 | 0.42 |
| 355.2654 | 254.56 | 23.56 | 22.96 | 23.55 | 23.44 | 0.46 |
| 355.8511 | 60.03  | 15.09 | 12.71 | 15.29 | 15.03 | 0.77 |
| 355.9288 | 35.72  | 16.17 | 17.81 | 17.65 | 17.28 | 1.32 |
| 355.9811 | 27.67  | 14.01 | 14.75 | 14.49 | 14.90 | 0.44 |
| 356.0075 | 30.65  | 13.60 | 14.00 | 14.61 | 14.40 | 0.45 |
| 356.0529 | 20.87  | 14.02 | 14.03 | 14.87 | 15.42 | 0.34 |
| 356.0597 | 21.64  | 14.80 | 13.35 | 12.55 | 13.08 | 0.99 |
| 356.0779 | 20.56  | 14.99 | 16.05 | 16.29 | 15.98 | 0.93 |
| 356.1221 | 30.1   | 17.56 | 19.17 | 19.41 | 17.89 | 0.87 |
| 356.2264 | 152.86 | 16.65 | 16.62 | 16.47 | 16.28 | 0.12 |
| 356.2682 | 250.48 | 21.51 | 20.85 | 21.49 | 21.36 | 0.52 |
| 356.2813 | 166.27 | 14.14 | 12.75 | 13.36 | 13.05 | 0.84 |
| 356.3425 | 19.27  | 12.88 | 12.20 | 10.69 | 16.02 | 0.34 |
| 356.7904 | 93.31  | 11.54 | 14.01 | 14.00 | 14.00 | 1.16 |
| 356.8001 | 89.15  | 14.13 | 14.62 | 15.18 | 15.29 | 0.62 |
| 356.8089 | 87.35  | 13.24 | 13.60 | 13.66 | 13.98 | 0.52 |
| 356.8267 | 80.49  | 11.40 | 13.52 | 13.91 | 14.55 | 1.03 |
| 356.8393 | 51.32  | 16.84 | 15.07 | 15.60 | 15.76 | 1.40 |
| 356.8466 | 44.2   | 16.19 | 15.18 | 17.04 | 16.71 | 0.11 |
| 356.8616 | 37.26  | 17.03 | 17.48 | 17.24 | 17.41 | 0.19 |
| 356.9201 | 144.08 | 16.16 | 13.95 | 14.26 | 14.61 | 1.42 |
| 356.9412 | 38.85  | 19.01 | 21.18 | 20.84 | 20.83 | 1.55 |
| 356.9915 | 17.85  | 19.07 | 19.66 | 19.49 | 19.85 | 0.42 |
| 357.0902 | 20.39  | 20.96 | 20.90 | 20.48 | 20.07 | 0.35 |
| 357.1840 | 89.87  | 14.49 | 12.47 | 14.71 | 15.42 | 0.42 |
| 357.2299 | 167.37 | 13.66 | 12.76 | 14.88 | 12.73 | 0.03 |
| 357.2709 | 250.32 | 18.10 | 17.16 | 18.06 | 18.06 | 0.60 |
| 357.2803 | 268.44 | 23.88 | 23.16 | 23.65 | 23.38 | 0.73 |
| 357.8664 | 67.97  | 14.78 | 10.82 | 13.48 | 12.28 | 0.80 |
| 357.9198 | 30.58  | 14.81 | 15.28 | 14.79 | 14.18 | 0.08 |
| 357.9343 | 31.19  | 14.40 | 15.66 | 15.67 | 14.62 | 0.66 |
| 357.9459 | 33.52  | 14.70 | 16.66 | 16.49 | 16.32 | 1.41 |
| 357.9601 | 36.06  | 15.83 | 14.59 | 14.28 | 14.34 | 0.82 |
| 357.9949 | 17.24  | 14.78 | 14.32 | 13.76 | 15.10 | 0.31 |
| 358.0045 | 19.81  | 15.35 | 15.51 | 15.73 | 16.31 | 0.24 |
| 358.0938 | 20.56  | 17.65 | 17.29 | 16.97 | 16.59 | 0.61 |
| 358.2414 | 178.11 | 20.42 | 20.38 | 20.40 | 19.89 | 0.07 |
| 358.2836 | 268    | 21.78 | 21.02 | 21.58 | 21.32 | 0.71 |
| 358.2971 | 236.34 | 18.75 | 18.29 | 18.51 | 18.79 | 0.33 |
| 358.8001 | 87.31  | 18.62 | 19.39 | 19.47 | 19.09 | 1.30 |
| 358.8437 | 16.86  | 14.17 | 9.27  | 9.81  | 10.63 | 1.61 |
| 358.8598 | 99.58  | 17.46 | 15.30 | 15.80 | 15.89 | 1.41 |
| 358.8783 | 138.51 | 10.18 | 17.44 | 9.62  | 9.31  | 0.68 |
| 358.8786 | 53.91  | 20.22 | 19.28 | 18.60 | 19.35 | 1.14 |
| 358.9125 | 32.04  | 10.83 | 13.80 | 13.99 | 11.64 | 0.65 |
| 358.9369 | 41.17  | 14.93 | 16.41 | 16.28 | 16.61 | 1.28 |
| 358.9955 | 41.41  | 16.21 | 14.39 | 13.96 | 15.06 | 0.82 |
| 359.0035 | 18.52  | 13.92 | 15.37 | 15.20 | 15.84 | 0.69 |
| 359.0495 | 19.31  | 14.05 | 16.65 | 17.27 | 17.22 | 1.58 |
| 359.0863 | 21.85  | 15.37 | 15.45 | 12.79 | 13.13 | 0.49 |
| 359.0935 | 31.38  | 16.34 | 14.63 | 14.67 | 14.91 | 1.17 |
| 359.1257 | 16.99  | 15.30 | 17.52 | 17.48 | 17.76 | 1.36 |
| 359.1763 | 209.72 | 15.41 | 13.68 | 13.98 | 15.10 | 0.94 |
| 359.2204 | 213.56 | 18.21 | 16.19 | 16.69 | 17.70 | 1.13 |
| 359.2235 | 39.89  | 17.73 | 16.61 | 16.75 | 17.86 | 0.52 |
| 359.2458 | 281.9  | 10.89 | 16.31 | 15.73 | 10.58 | 1.08 |
| 359.2805 | 268.97 | 18.53 | 17.64 | 17.85 | 17.68 | 0.80 |
| 359.2869 | 269.22 | 17.74 | 17.08 | 17.72 | 17.48 | 0.41 |
| 359.2963 | 286.51 | 23.86 | 23.35 | 23.78 | 23.54 | 0.44 |
| 359.8839 | 34.54  | 16.49 | 16.20 | 15.79 | 16.65 | 0.48 |

|          |        |       |       |       |       |      |
|----------|--------|-------|-------|-------|-------|------|
| 359.9184 | 37.48  | 18.30 | 18.04 | 18.42 | 17.55 | 0.11 |
| 359.9488 | 29.69  | 13.38 | 15.27 | 15.27 | 14.66 | 1.53 |
| 359.9698 | 33.81  | 11.39 | 13.56 | 14.24 | 11.57 | 0.85 |
| 359.9908 | 33.97  | 14.97 | 14.20 | 14.66 | 14.58 | 0.40 |
| 359.9992 | 30     | 14.79 | 13.58 | 15.14 | 16.01 | 0.18 |
| 360.0256 | 18.14  | 12.99 | 15.52 | 13.79 | 15.12 | 0.90 |
| 360.0473 | 28.87  | 15.45 | 14.83 | 14.82 | 15.07 | 0.73 |
| 360.0607 | 27.9   | 15.85 | 16.12 | 16.03 | 15.91 | 0.28 |
| 360.2220 | 142.25 | 18.07 | 17.52 | 17.51 | 17.21 | 0.47 |
| 360.2229 | 224.58 | 16.23 | 11.67 | 13.19 | 14.09 | 1.41 |
| 360.2387 | 176    | 15.93 | 15.36 | 15.78 | 15.36 | 0.44 |
| 360.2524 | 161.52 | 17.56 | 16.70 | 17.47 | 17.32 | 0.55 |
| 360.2993 | 288.8  | 21.81 | 21.31 | 21.78 | 21.48 | 0.39 |
| 360.7984 | 91.1   | 16.40 | 17.23 | 17.39 | 16.88 | 1.30 |
| 360.8079 | 32.23  | 15.39 | 13.13 | 13.87 | 13.92 | 0.95 |
| 360.8159 | 76.98  | 20.06 | 20.68 | 20.83 | 20.45 | 1.24 |
| 360.8744 | 46.51  | 17.38 | 17.76 | 18.18 | 17.53 | 0.80 |
| 360.9308 | 43.21  | 14.67 | 15.62 | 14.99 | 15.10 | 0.46 |
| 360.9540 | 47.8   | 18.74 | 18.23 | 18.48 | 18.53 | 0.32 |
| 360.9719 | 26.55  | 19.66 | 22.31 | 22.62 | 21.96 | 2.05 |
| 361.0191 | 18.67  | 14.45 | 17.81 | 17.76 | 17.94 | 1.66 |
| 361.0469 | 32.96  | 18.81 | 19.10 | 18.91 | 18.72 | 0.31 |
| 361.0583 | 65.02  | 17.99 | 19.21 | 17.51 | 17.57 | 0.53 |
| 361.0794 | 28.44  | 12.86 | 15.79 | 10.76 | 11.43 | 0.24 |
| 361.1001 | 46.3   | 12.28 | 22.37 | 15.13 | 11.93 | 1.39 |
| 361.1788 | 213.22 | 18.09 | 18.30 | 18.91 | 18.87 | 0.76 |
| 361.1899 | 226.37 | 18.95 | 18.80 | 18.87 | 19.49 | 0.06 |
| 361.2251 | 134.19 | 15.58 | 14.06 | 13.94 | 14.40 | 0.98 |
| 361.2368 | 245.35 | 21.74 | 20.85 | 21.07 | 21.34 | 1.46 |
| 361.2392 | 39.27  | 17.21 | 15.34 | 15.68 | 16.01 | 0.76 |
| 361.2602 | 224.63 | 17.78 | 16.69 | 16.05 | 16.72 | 1.15 |
| 361.3026 | 292.67 | 18.59 | 17.66 | 18.36 | 18.10 | 0.67 |
| 361.8193 | 89.22  | 13.80 | 13.71 | 14.31 | 13.49 | 0.11 |
| 361.8817 | 27.29  | 15.54 | 15.15 | 14.86 | 15.86 | 0.29 |
| 361.9491 | 36.66  | 15.84 | 15.96 | 16.51 | 15.85 | 0.27 |
| 362.0519 | 20.48  | 21.40 | 24.40 | 24.04 | 23.22 | 1.79 |
| 362.1037 | 56.29  | 13.76 | 19.25 | 12.78 | 12.39 | 0.78 |
| 362.1824 | 213.88 | 15.46 | 15.42 | 15.90 | 15.93 | 0.24 |
| 362.2378 | 169.09 | 21.12 | 20.76 | 20.87 | 20.29 | 0.47 |
| 362.2401 | 239.98 | 19.11 | 18.02 | 18.24 | 18.53 | 1.44 |
| 362.2838 | 266.54 | 17.29 | 17.01 | 17.09 | 18.16 | 0.06 |
| 362.8140 | 81.44  | 17.59 | 18.37 | 18.63 | 18.08 | 1.44 |
| 362.8465 | 96.96  | 12.96 | 14.41 | 14.42 | 14.93 | 0.78 |
| 362.8686 | 43.96  | 15.07 | 14.98 | 15.75 | 14.36 | 0.13 |
| 362.8881 | 35.97  | 16.99 | 16.95 | 17.42 | 17.02 | 0.10 |
| 362.8918 | 154.43 | 17.02 | 14.48 | 14.14 | 15.56 | 1.71 |
| 362.9123 | 50.2   | 21.23 | 21.48 | 21.67 | 21.76 | 0.76 |
| 362.9300 | 18.49  | 15.86 | 22.07 | 21.86 | 20.69 | 1.93 |
| 362.9744 | 17.34  | 15.62 | 17.16 | 17.60 | 17.22 | 1.38 |
| 363.0096 | 62.6   | 14.13 | 12.57 | 14.85 | 15.85 | 0.15 |
| 363.0350 | 17.7   | 15.32 | 17.16 | 17.16 | 17.12 | 1.56 |
| 363.0488 | 17.87  | 14.05 | 16.59 | 15.99 | 15.35 | 1.32 |
| 363.1337 | 25.21  | 13.78 | 14.62 | 14.36 | 13.65 | 0.44 |
| 363.1585 | 40.6   | 16.69 | 14.62 | 15.48 | 16.50 | 0.85 |
| 363.1952 | 244.3  | 20.88 | 21.23 | 21.54 | 21.42 | 1.22 |
| 363.2143 | 217.79 | 20.25 | 18.88 | 19.51 | 20.21 | 1.31 |
| 363.2318 | 228    | 16.83 | 15.12 | 14.49 | 16.03 | 0.95 |
| 363.2408 | 169.2  | 18.67 | 18.19 | 18.35 | 17.75 | 0.57 |
| 363.2523 | 267.05 | 21.74 | 21.27 | 21.43 | 21.83 | 0.66 |
| 363.2545 | 48.79  | 15.39 | 12.82 | 13.02 | 14.02 | 0.94 |
| 363.9158 | 48.63  | 16.82 | 17.00 | 17.35 | 17.36 | 0.63 |
| 363.9262 | 25.68  | 17.73 | 18.52 | 18.63 | 18.89 | 0.98 |

|          |        |       |       |       |       |      |
|----------|--------|-------|-------|-------|-------|------|
| 363.9336 | 17.97  | 14.84 | 16.52 | 16.33 | 15.73 | 1.39 |
| 364.0400 | 27.33  | 15.27 | 17.51 | 17.82 | 16.53 | 1.86 |
| 364.0567 | 18.13  | 14.54 | 17.63 | 16.93 | 15.98 | 1.33 |
| 364.0676 | 22.71  | 14.76 | 17.31 | 17.15 | 16.39 | 1.41 |
| 364.1308 | 25.42  | 14.63 | 14.86 | 15.18 | 14.49 | 0.25 |
| 364.1984 | 240.11 | 17.98 | 18.45 | 18.83 | 18.58 | 1.19 |
| 364.2139 | 227.68 | 17.78 | 16.11 | 16.89 | 17.77 | 1.34 |
| 364.2188 | 72.8   | 15.31 | 12.04 | 13.94 | 15.51 | 0.99 |
| 364.2334 | 161.86 | 16.45 | 15.78 | 15.90 | 15.48 | 0.89 |
| 364.2441 | 162.12 | 14.96 | 13.98 | 14.06 | 13.63 | 0.94 |
| 364.2555 | 267.24 | 18.78 | 18.25 | 18.25 | 18.94 | 0.55 |
| 364.8051 | 83.3   | 16.76 | 16.13 | 16.61 | 16.38 | 0.81 |
| 364.8341 | 93.42  | 13.29 | 11.11 | 12.79 | 11.59 | 0.51 |
| 364.8496 | 63.58  | 19.05 | 18.67 | 19.66 | 19.49 | 0.17 |
| 364.8703 | 47.05  | 22.72 | 23.46 | 24.08 | 23.88 | 1.62 |
| 364.8830 | 34.92  | 15.50 | 17.62 | 18.17 | 16.30 | 1.78 |
| 364.8891 | 60.96  | 15.04 | 13.43 | 14.81 | 14.72 | 0.80 |
| 364.9094 | 42.48  | 18.16 | 18.45 | 18.75 | 18.91 | 0.91 |
| 364.9341 | 18.79  | 14.57 | 15.96 | 15.69 | 15.25 | 1.00 |
| 364.9478 | 23.87  | 15.29 | 16.98 | 17.42 | 17.89 | 1.19 |
| 364.9988 | 29.47  | 15.99 | 15.62 | 15.75 | 15.71 | 0.28 |
| 365.0341 | 30.39  | 17.37 | 17.75 | 18.11 | 17.99 | 0.56 |
| 365.0515 | 19.36  | 18.24 | 18.82 | 19.28 | 19.40 | 0.93 |
| 365.1212 | 179.24 | 14.11 | 13.14 | 13.50 | 12.35 | 0.81 |
| 365.1382 | 27.82  | 17.86 | 18.05 | 17.65 | 17.71 | 0.02 |
| 365.2089 | 253.04 | 19.78 | 20.53 | 20.75 | 20.84 | 1.08 |
| 365.2294 | 239.57 | 19.27 | 18.27 | 18.62 | 19.15 | 1.12 |
| 365.2469 | 249.93 | 19.13 | 18.39 | 18.16 | 18.79 | 0.96 |
| 365.2676 | 299.14 | 17.38 | 18.76 | 19.34 | 18.88 | 1.11 |
| 365.8530 | 67.81  | 13.68 | 11.22 | 14.27 | 13.94 | 0.60 |
| 365.8739 | 46.63  | 18.31 | 18.93 | 19.72 | 19.50 | 1.48 |
| 365.8841 | 32.95  | 15.96 | 14.02 | 14.00 | 15.32 | 0.87 |
| 365.9568 | 32.86  | 15.99 | 18.68 | 18.87 | 17.97 | 1.88 |
| 366.0314 | 46.07  | 16.22 | 18.10 | 18.64 | 17.63 | 1.52 |
| 366.0548 | 24.85  | 15.29 | 13.82 | 14.91 | 15.42 | 0.48 |
| 366.1512 | 25.61  | 16.66 | 15.91 | 16.08 | 15.92 | 0.93 |
| 366.2135 | 261.86 | 17.39 | 17.89 | 18.06 | 18.08 | 0.44 |
| 366.2710 | 299.55 | 15.60 | 16.13 | 16.73 | 16.36 | 0.78 |
| 366.7609 | 92.78  | 14.01 | 14.04 | 14.26 | 14.34 | 0.21 |
| 366.8215 | 86.4   | 15.79 | 14.72 | 15.44 | 15.40 | 1.13 |
| 366.8288 | 57.92  | 18.31 | 18.61 | 19.48 | 19.09 | 1.02 |
| 366.8446 | 157.78 | 14.58 | 16.16 | 10.24 | 13.12 | 0.29 |
| 366.8685 | 54.08  | 20.28 | 21.02 | 21.71 | 21.51 | 1.55 |
| 366.8749 | 36.16  | 15.45 | 15.97 | 16.30 | 16.18 | 0.82 |
| 366.9200 | 27.36  | 14.73 | 13.57 | 14.53 | 13.66 | 0.54 |
| 366.9409 | 31.57  | 14.33 | 15.63 | 16.11 | 15.38 | 1.30 |
| 366.9501 | 30.08  | 13.51 | 14.63 | 14.78 | 14.35 | 0.86 |
| 366.9612 | 30.32  | 13.88 | 15.03 | 14.50 | 14.94 | 0.45 |
| 366.9725 | 67.78  | 12.91 | 14.62 | 15.71 | 16.17 | 1.23 |
| 367.0453 | 66.14  | 13.52 | 14.87 | 11.45 | 12.14 | 0.21 |
| 367.0539 | 21.68  | 16.42 | 19.82 | 19.35 | 18.97 | 1.90 |
| 367.1286 | 65.59  | 11.63 | 15.67 | 9.85  | 10.39 | 0.51 |
| 367.1483 | 25.17  | 17.44 | 17.09 | 16.80 | 16.28 | 0.47 |
| 367.1735 | 189.02 | 15.01 | 14.04 | 15.31 | 13.76 | 0.44 |
| 367.2155 | 173.38 | 16.89 | 16.95 | 15.81 | 17.47 | 0.24 |
| 367.2265 | 299.58 | 14.47 | 17.28 | 17.95 | 17.14 | 1.51 |
| 367.2304 | 179.96 | 16.51 | 17.04 | 16.37 | 17.19 | 0.32 |
| 367.2440 | 257.91 | 19.51 | 18.34 | 18.57 | 18.90 | 1.21 |
| 367.2499 | 184.84 | 15.35 | 14.33 | 15.54 | 14.68 | 0.40 |
| 367.2859 | 185.85 | 15.79 | 15.06 | 15.71 | 15.92 | 0.49 |
| 367.3585 | 278.14 | 20.17 | 18.51 | 18.71 | 19.57 | 1.36 |
| 367.8717 | 53.93  | 15.59 | 15.91 | 16.67 | 16.43 | 1.10 |

|          |        |       |       |       |       |      |
|----------|--------|-------|-------|-------|-------|------|
| 367.9656 | 41.16  | 17.32 | 18.51 | 18.31 | 17.65 | 1.11 |
| 367.9697 | 63.47  | 15.04 | 16.88 | 17.61 | 17.44 | 1.63 |
| 367.9827 | 67.31  | 13.27 | 12.83 | 14.19 | 14.66 | 0.18 |
| 368.0781 | 24.32  | 19.78 | 20.17 | 20.37 | 20.18 | 0.60 |
| 368.2185 | 165.35 | 13.48 | 13.61 | 11.60 | 14.38 | 0.22 |
| 368.2297 | 297.54 | 13.01 | 13.64 | 14.88 | 13.64 | 0.91 |
| 368.2344 | 171.93 | 13.65 | 13.93 | 12.71 | 14.34 | 0.10 |
| 368.2633 | 218.09 | 16.57 | 14.30 | 16.18 | 15.88 | 0.74 |
| 368.2809 | 229.03 | 17.76 | 17.43 | 17.83 | 17.39 | 0.20 |
| 368.2812 | 168.91 | 14.82 | 13.20 | 13.86 | 13.80 | 1.46 |
| 368.3174 | 187.08 | 14.75 | 13.82 | 14.13 | 14.30 | 0.82 |
| 368.3619 | 284.41 | 17.04 | 17.53 | 17.30 | 16.69 | 0.17 |
| 368.8266 | 71.66  | 16.22 | 16.22 | 17.40 | 16.94 | 0.72 |
| 368.8366 | 151.81 | 15.13 | 11.89 | 13.81 | 14.86 | 1.03 |
| 368.8467 | 77.76  | 15.13 | 14.21 | 15.81 | 15.89 | 0.11 |
| 368.8572 | 70.86  | 15.12 | 11.03 | 13.45 | 14.28 | 1.12 |
| 368.8654 | 53.45  | 16.56 | 16.25 | 17.26 | 17.09 | 0.31 |
| 368.8724 | 29.19  | 8.65  | 9.55  | 14.23 | 12.62 | 0.77 |
| 368.8781 | 58.61  | 16.46 | 14.54 | 14.97 | 15.04 | 1.40 |
| 368.9199 | 45.71  | 14.22 | 13.88 | 14.33 | 13.79 | 0.08 |
| 368.9411 | 39.95  | 17.27 | 18.41 | 17.95 | 18.27 | 0.82 |
| 368.9823 | 37.08  | 17.93 | 18.78 | 18.99 | 18.88 | 1.75 |
| 369.0002 | 16.72  | 18.58 | 21.45 | 21.62 | 21.30 | 1.72 |
| 369.0227 | 23.52  | 16.35 | 19.38 | 19.54 | 18.72 | 1.62 |
| 369.0445 | 19.52  | 9.77  | 12.66 | 9.70  | 11.96 | 0.52 |
| 369.0814 | 24.38  | 16.27 | 16.42 | 16.70 | 16.73 | 0.35 |
| 369.2051 | 206.87 | 20.01 | 20.18 | 20.44 | 20.49 | 0.42 |
| 369.2206 | 136.19 | 17.25 | 18.35 | 18.74 | 17.31 | 0.91 |
| 369.2289 | 20.27  | 21.61 | 20.29 | 20.86 | 22.01 | 0.67 |
| 369.2385 | 260.53 | 16.98 | 16.61 | 16.29 | 16.22 | 0.34 |
| 369.2478 | 214.93 | 16.95 | 14.48 | 13.64 | 15.23 | 1.35 |
| 369.2665 | 214    | 16.50 | 15.90 | 16.99 | 15.31 | 0.13 |
| 369.2841 | 224.22 | 14.89 | 13.96 | 15.16 | 14.86 | 0.17 |
| 369.3014 | 294.57 | 16.55 | 18.27 | 18.55 | 18.13 | 1.74 |
| 369.5910 | 18.35  | 16.59 | 20.90 | 21.31 | 21.50 | 1.96 |
| 369.9131 | 29.25  | 14.07 | 14.50 | 14.26 | 14.40 | 0.20 |
| 369.9677 | 78.7   | 9.29  | 14.40 | 14.45 | 13.37 | 1.69 |
| 369.9834 | 45.45  | 15.24 | 15.25 | 17.05 | 17.02 | 0.68 |
| 370.0260 | 28.45  | 10.98 | 14.64 | 15.02 | 14.35 | 1.38 |
| 370.0906 | 23.68  | 18.65 | 20.06 | 20.34 | 20.27 | 1.54 |
| 370.1573 | 32.11  | 14.80 | 14.19 | 13.18 | 13.69 | 0.49 |
| 370.2083 | 206.97 | 17.57 | 17.79 | 18.11 | 18.09 | 0.41 |
| 370.2239 | 141.57 | 14.69 | 15.25 | 15.94 | 14.50 | 0.53 |
| 370.2327 | 23.31  | 19.14 | 17.53 | 18.32 | 19.59 | 0.68 |
| 370.2969 | 231.76 | 17.54 | 18.46 | 18.86 | 17.88 | 0.81 |
| 370.8156 | 57.16  | 16.50 | 14.99 | 16.05 | 16.18 | 0.97 |
| 370.8266 | 52.96  | 16.18 | 16.44 | 17.66 | 16.96 | 1.21 |
| 370.8362 | 48.91  | 20.30 | 19.32 | 19.35 | 19.91 | 1.19 |
| 370.8563 | 97.08  | 13.27 | 14.87 | 15.36 | 14.99 | 1.38 |
| 370.8994 | 41.62  | 20.92 | 22.47 | 22.18 | 22.09 | 1.51 |
| 370.9568 | 39.23  | 17.14 | 18.20 | 17.93 | 18.18 | 0.94 |
| 371.0059 | 23.63  | 15.73 | 16.46 | 16.44 | 16.74 | 0.77 |
| 371.0613 | 65.96  | 8.37  | 19.92 | 7.55  | 7.59  | 1.05 |
| 371.0917 | 21.51  | 14.41 | 15.46 | 15.86 | 15.90 | 0.94 |
| 371.1602 | 33.1   | 18.47 | 18.30 | 18.33 | 17.66 | 0.18 |
| 371.2211 | 237.94 | 21.90 | 21.80 | 22.05 | 22.31 | 0.14 |
| 371.2444 | 220.53 | 16.18 | 16.19 | 16.60 | 16.43 | 0.28 |
| 371.2447 | 21.08  | 15.62 | 15.05 | 14.84 | 16.42 | 0.29 |
| 371.2596 | 184.26 | 17.34 | 15.95 | 17.43 | 17.21 | 0.57 |
| 371.2808 | 210.44 | 13.63 | 14.52 | 15.08 | 14.55 | 0.50 |
| 371.2817 | 284.32 | 14.99 | 16.38 | 17.19 | 16.39 | 0.74 |
| 371.9027 | 40.96  | 16.73 | 18.14 | 17.98 | 17.76 | 1.69 |



|          |        |       |       |       |       |      |
|----------|--------|-------|-------|-------|-------|------|
| 371.9823 | 52.35  | 13.31 | 13.14 | 14.28 | 14.18 | 0.25 |
| 371.9907 | 32.4   | 13.76 | 15.12 | 15.59 | 13.72 | 1.00 |
| 371.9974 | 30.82  | 15.62 | 15.42 | 15.34 | 15.30 | 0.37 |
| 372.0648 | 70.87  | 13.95 | 15.81 | 12.11 | 12.74 | 0.04 |
| 372.0824 | 18.38  | 13.86 | 15.57 | 15.91 | 16.14 | 1.18 |
| 372.2243 | 238.13 | 19.55 | 19.34 | 19.65 | 19.94 | 0.03 |
| 372.2607 | 175.04 | 15.39 | 13.13 | 15.19 | 14.83 | 0.71 |
| 372.3029 | 26.34  | 13.67 | 14.88 | 13.09 | 15.57 | 0.36 |
| 372.3123 | 266.63 | 18.15 | 18.49 | 18.48 | 19.35 | 0.39 |
| 372.8131 | 59.67  | 15.44 | 12.77 | 14.46 | 14.86 | 1.07 |
| 372.8360 | 57.53  | 21.36 | 19.90 | 20.94 | 21.25 | 0.49 |
| 372.8574 | 100.96 | 15.04 | 13.86 | 13.97 | 14.25 | 1.08 |
| 372.8752 | 84.29  | 14.63 | 12.84 | 13.14 | 13.52 | 0.89 |
| 372.8963 | 59.23  | 18.15 | 18.08 | 17.74 | 17.70 | 0.29 |
| 372.9150 | 36.53  | 20.65 | 22.37 | 22.17 | 22.07 | 1.81 |
| 372.9849 | 21.88  | 15.58 | 16.91 | 15.91 | 16.59 | 0.61 |
| 373.0567 | 17.56  | 13.71 | 16.03 | 15.68 | 15.97 | 1.15 |
| 373.0666 | 17.75  | 13.32 | 16.19 | 16.37 | 16.43 | 1.48 |
| 373.2050 | 213.27 | 16.13 | 13.12 | 14.57 | 16.11 | 1.11 |
| 373.2366 | 253.71 | 19.37 | 18.68 | 19.19 | 19.34 | 0.76 |
| 373.2602 | 240.19 | 21.40 | 21.23 | 20.97 | 20.92 | 0.27 |
| 373.2763 | 206.01 | 16.98 | 14.64 | 16.38 | 16.48 | 0.79 |
| 373.2964 | 268.54 | 20.43 | 18.94 | 19.18 | 19.03 | 1.47 |
| 373.8400 | 80.63  | 16.40 | 15.39 | 15.94 | 15.78 | 1.01 |
| 373.9079 | 32.31  | 15.40 | 15.20 | 15.44 | 14.54 | 0.19 |
| 373.9184 | 42.63  | 15.65 | 17.77 | 17.50 | 17.44 | 1.73 |
| 373.9490 | 32.24  | 14.33 | 13.28 | 14.50 | 13.83 | 0.31 |
| 374.0397 | 25.66  | 16.01 | 15.82 | 14.95 | 15.12 | 0.45 |
| 374.1936 | 73.88  | 14.17 | 16.06 | 12.48 | 13.05 | 0.10 |
| 374.2218 | 162.02 | 14.00 | 14.43 | 14.29 | 14.59 | 0.33 |
| 374.2308 | 61.93  | 13.86 | 19.76 | 12.05 | 12.63 | 0.72 |
| 374.2454 | 180.19 | 22.66 | 22.91 | 22.89 | 22.06 | 0.16 |
| 374.2634 | 227.86 | 19.05 | 18.66 | 18.38 | 18.42 | 0.44 |
| 374.2822 | 259.6  | 18.45 | 17.06 | 16.18 | 15.61 | 0.99 |
| 374.2996 | 269.33 | 17.79 | 15.88 | 15.63 | 15.45 | 0.93 |
| 374.7741 | 89.96  | 16.42 | 17.94 | 18.09 | 17.55 | 1.59 |
| 374.8524 | 63.23  | 21.10 | 20.39 | 20.96 | 20.77 | 0.68 |
| 374.8862 | 39.22  | 13.31 | 14.59 | 14.37 | 14.42 | 0.47 |
| 374.8922 | 62.7   | 15.36 | 13.31 | 14.71 | 15.28 | 0.87 |
| 374.9106 | 38.95  | 16.80 | 18.46 | 18.42 | 18.23 | 1.69 |
| 374.9195 | 43.61  | 14.19 | 15.30 | 15.04 | 14.88 | 1.17 |
| 374.9695 | 46.63  | 16.73 | 14.94 | 15.60 | 15.43 | 0.74 |
| 374.9906 | 31.81  | 15.04 | 15.27 | 15.35 | 15.67 | 0.35 |
| 375.0615 | 28.49  | 12.64 | 16.34 | 16.66 | 14.91 | 1.94 |
| 375.0952 | 66.82  | 15.99 | 17.19 | 15.21 | 15.43 | 0.28 |
| 375.1161 | 49.76  | 12.07 | 16.96 | 12.61 | 12.47 | 0.89 |
| 375.1548 | 24.57  | 13.25 | 13.53 | 14.37 | 12.83 | 0.19 |
| 375.1947 | 215.76 | 16.51 | 15.26 | 15.56 | 15.69 | 0.93 |
| 375.2215 | 247.45 | 20.43 | 19.97 | 20.13 | 20.55 | 0.73 |
| 375.2313 | 179.48 | 15.70 | 13.31 | 13.79 | 13.71 | 1.31 |
| 375.2338 | 63.29  | 4.59  | 16.82 | 4.40  | 4.35  | 1.19 |
| 375.2489 | 174.83 | 20.41 | 20.64 | 20.66 | 19.79 | 0.15 |
| 375.2757 | 246.18 | 22.62 | 22.20 | 22.16 | 22.21 | 0.71 |
| 375.2913 | 224.93 | 16.82 | 15.31 | 16.23 | 16.39 | 0.77 |
| 375.8568 | 55.55  | 16.46 | 14.30 | 15.98 | 16.12 | 1.08 |
| 375.8920 | 37.84  | 16.43 | 14.63 | 15.32 | 14.60 | 0.79 |
| 375.9227 | 35.99  | 13.62 | 14.96 | 15.36 | 14.62 | 0.94 |
| 375.9646 | 36.39  | 15.28 | 13.91 | 14.95 | 14.82 | 0.60 |
| 375.9931 | 29.54  | 12.94 | 15.91 | 16.46 | 14.69 | 2.04 |
| 376.0097 | 24.28  | 16.43 | 16.45 | 16.76 | 16.89 | 0.22 |
| 376.0668 | 18.28  | 12.78 | 14.26 | 13.01 | 14.39 | 0.48 |
| 376.1009 | 16.93  | 13.75 | 15.26 | 14.67 | 15.00 | 0.93 |

|          |        |       |       |       |       |      |
|----------|--------|-------|-------|-------|-------|------|
| 376.2253 | 250.76 | 16.95 | 16.74 | 16.77 | 17.32 | 0.20 |
| 376.2346 | 38.32  | 12.76 | 14.44 | 11.65 | 12.00 | 0.19 |
| 376.2518 | 180.51 | 17.40 | 17.34 | 17.41 | 16.66 | 0.13 |
| 376.2792 | 253.12 | 20.41 | 19.98 | 19.98 | 19.96 | 0.66 |
| 376.7723 | 90.86  | 15.23 | 15.81 | 15.87 | 15.54 | 0.72 |
| 376.7898 | 72.82  | 18.16 | 19.19 | 19.49 | 19.06 | 1.38 |
| 376.8446 | 53.93  | 16.97 | 17.00 | 17.33 | 16.24 | 0.09 |
| 376.8561 | 140.91 | 16.31 | 15.14 | 14.63 | 16.04 | 1.07 |
| 376.8704 | 82.48  | 14.37 | 13.55 | 13.81 | 14.59 | 0.40 |
| 376.9049 | 32.64  | 15.86 | 18.89 | 18.80 | 18.24 | 2.00 |
| 376.9279 | 50.42  | 18.89 | 17.85 | 18.48 | 18.37 | 0.59 |
| 376.9468 | 43.4   | 18.11 | 19.17 | 19.56 | 19.30 | 1.15 |
| 376.9703 | 27.83  | 14.19 | 14.78 | 14.21 | 15.03 | 0.24 |
| 376.9787 | 25.09  | 12.68 | 15.83 | 16.10 | 14.96 | 1.55 |
| 377.0057 | 187.77 | 17.60 | 16.91 | 16.92 | 17.71 | 0.69 |
| 377.0134 | 17.36  | 12.88 | 17.15 | 17.25 | 17.03 | 1.45 |
| 377.0636 | 32.79  | 14.52 | 12.45 | 15.30 | 14.79 | 0.31 |
| 377.0742 | 51.86  | 14.56 | 23.95 | 14.32 | 13.32 | 1.06 |
| 377.0869 | 20.77  | 19.70 | 20.43 | 20.28 | 20.26 | 0.80 |
| 377.0950 | 29.42  | 16.28 | 18.04 | 15.56 | 15.75 | 0.53 |
| 377.1662 | 234.03 | 16.24 | 17.21 | 17.56 | 17.76 | 1.04 |
| 377.2108 | 245.21 | 20.16 | 19.86 | 20.18 | 19.98 | 0.33 |
| 377.2368 | 271.6  | 22.05 | 22.08 | 22.23 | 22.90 | 0.26 |
| 377.2818 | 250.32 | 17.29 | 16.14 | 16.04 | 16.09 | 1.09 |
| 377.9230 | 33.18  | 15.67 | 15.11 | 15.39 | 15.02 | 0.36 |
| 377.9488 | 87.03  | 14.02 | 15.59 | 16.80 | 16.06 | 1.55 |
| 377.9901 | 30.09  | 12.67 | 12.46 | 13.75 | 12.10 | 0.17 |
| 378.0777 | 53.65  | 15.41 | 20.90 | 14.36 | 14.64 | 0.88 |
| 378.0904 | 21.56  | 16.24 | 16.83 | 16.57 | 16.61 | 0.48 |
| 378.2140 | 242.97 | 17.10 | 16.61 | 16.99 | 16.24 | 0.35 |
| 378.2406 | 267.46 | 19.01 | 18.91 | 19.10 | 20.08 | 0.12 |
| 378.2421 | 173.38 | 14.96 | 18.01 | 17.80 | 16.35 | 1.23 |
| 378.7813 | 68.23  | 17.51 | 17.73 | 18.09 | 18.00 | 0.76 |
| 378.7882 | 82.79  | 15.79 | 16.82 | 17.19 | 16.57 | 1.34 |
| 378.8206 | 95.83  | 13.75 | 13.73 | 13.76 | 14.01 | 0.02 |
| 378.8409 | 61.77  | 15.62 | 14.52 | 15.10 | 14.25 | 0.93 |
| 378.8520 | 137.91 | 16.05 | 15.20 | 14.74 | 16.16 | 0.59 |
| 378.8655 | 161.97 | 18.44 | 16.69 | 16.24 | 17.24 | 1.73 |
| 378.8861 | 46.21  | 20.85 | 20.58 | 21.55 | 21.44 | 0.39 |
| 378.9246 | 45.46  | 15.80 | 13.62 | 14.02 | 13.96 | 0.84 |
| 378.9435 | 86.22  | 13.74 | 15.68 | 16.74 | 15.90 | 1.64 |
| 378.9736 | 18.13  | 15.47 | 12.03 | 11.64 | 13.56 | 1.53 |
| 378.9836 | 38.69  | 17.33 | 16.19 | 16.20 | 17.13 | 0.89 |
| 379.0292 | 19.14  | 13.47 | 15.03 | 14.81 | 15.89 | 0.85 |
| 379.0722 | 61.58  | 13.81 | 19.78 | 11.76 | 12.42 | 0.66 |
| 379.0831 | 30.2   | 17.74 | 18.86 | 18.34 | 18.27 | 0.95 |
| 379.1563 | 143.58 | 14.89 | 13.00 | 12.37 | 14.52 | 1.09 |
| 379.1897 | 64.55  | 18.78 | 17.90 | 19.09 | 19.77 | 0.16 |
| 379.2260 | 265.75 | 20.14 | 20.05 | 20.28 | 20.28 | 0.06 |
| 379.2499 | 26.37  | 17.37 | 15.57 | 16.92 | 17.51 | 0.42 |
| 379.2519 | 296.28 | 17.44 | 19.93 | 20.52 | 20.49 | 1.34 |
| 379.2972 | 277.01 | 18.38 | 18.30 | 18.47 | 18.10 | 0.05 |
| 379.8891 | 50.98  | 16.31 | 15.47 | 16.67 | 16.61 | 0.34 |
| 379.9306 | 26.2   | 13.41 | 14.84 | 14.80 | 14.93 | 1.27 |
| 379.9420 | 30.58  | 14.09 | 15.25 | 15.15 | 15.19 | 0.87 |
| 380.0071 | 33.74  | 13.10 | 14.71 | 13.53 | 15.55 | 0.63 |
| 380.0159 | 17.94  | 15.30 | 19.16 | 19.29 | 18.37 | 2.06 |
| 380.0624 | 22.34  | 15.28 | 16.50 | 16.93 | 16.56 | 1.13 |
| 380.0755 | 53.9   | 14.79 | 15.67 | 13.56 | 13.97 | 0.18 |
| 380.1931 | 71.88  | 16.17 | 14.32 | 16.23 | 17.08 | 0.46 |
| 380.2297 | 268.1  | 17.25 | 17.58 | 18.02 | 17.52 | 0.39 |
| 380.2563 | 297.11 | 14.08 | 17.30 | 18.02 | 18.00 | 1.45 |

|          |        |       |       |       |       |      |
|----------|--------|-------|-------|-------|-------|------|
| 380.2578 | 176.04 | 10.39 | 14.41 | 13.98 | 12.53 | 1.14 |
| 380.7795 | 76.69  | 16.46 | 16.66 | 17.05 | 16.91 | 0.80 |
| 380.7978 | 71.15  | 17.31 | 17.08 | 17.81 | 17.68 | 0.27 |
| 380.8088 | 84.09  | 15.26 | 15.46 | 16.18 | 15.46 | 0.71 |
| 380.8265 | 85.24  | 13.64 | 11.82 | 13.03 | 14.16 | 0.67 |
| 380.8456 | 41.01  | 21.41 | 21.72 | 22.61 | 22.40 | 1.10 |
| 380.8579 | 37.65  | 15.31 | 15.37 | 15.86 | 14.60 | 0.13 |
| 380.8646 | 62.33  | 16.54 | 15.46 | 17.39 | 17.26 | 0.12 |
| 380.8733 | 27.73  | 14.64 | 15.90 | 16.34 | 15.21 | 1.17 |
| 380.8812 | 157.19 | 17.77 | 14.63 | 13.63 | 14.39 | 1.55 |
| 381.0088 | 47.74  | 15.36 | 15.76 | 16.85 | 16.54 | 0.56 |
| 381.1114 | 18.42  | 23.33 | 23.99 | 23.93 | 23.54 | 0.75 |
| 381.1876 | 73.79  | 14.49 | 12.03 | 13.76 | 14.98 | 0.75 |
| 381.2055 | 185.29 | 14.84 | 12.50 | 12.84 | 13.02 | 1.28 |
| 381.2057 | 86.64  | 15.55 | 14.72 | 15.30 | 16.01 | 0.57 |
| 381.2319 | 291.27 | 14.48 | 17.00 | 17.31 | 15.57 | 1.40 |
| 381.2323 | 180.38 | 17.66 | 17.82 | 17.61 | 18.11 | 0.12 |
| 381.2428 | 299.53 | 16.54 | 17.64 | 18.34 | 17.56 | 1.32 |
| 381.2471 | 178.36 | 14.97 | 15.54 | 14.74 | 15.67 | 0.26 |
| 381.2655 | 28.93  | 15.13 | 12.36 | 13.33 | 14.99 | 0.90 |
| 381.3128 | 296.97 | 15.53 | 15.44 | 16.23 | 15.46 | 0.25 |
| 381.8477 | 46.85  | 17.10 | 16.85 | 18.19 | 17.94 | 0.55 |
| 381.8665 | 28.92  | 14.11 | 14.47 | 13.74 | 14.90 | 0.08 |
| 381.9214 | 35.16  | 16.53 | 17.22 | 17.11 | 16.43 | 0.82 |
| 381.9308 | 35.52  | 17.13 | 19.16 | 19.37 | 18.55 | 1.98 |
| 382.0062 | 55.08  | 16.03 | 17.85 | 18.82 | 17.98 | 1.65 |
| 382.1016 | 17.81  | 19.03 | 21.11 | 21.16 | 20.90 | 1.58 |
| 382.1149 | 18.56  | 19.77 | 20.39 | 20.34 | 19.97 | 0.73 |
| 382.2357 | 180.66 | 14.97 | 14.92 | 14.43 | 15.38 | 0.15 |
| 382.2429 | 171.08 | 16.34 | 16.10 | 16.71 | 15.96 | 0.02 |
| 382.2448 | 297.4  | 13.26 | 14.43 | 15.42 | 14.27 | 1.05 |
| 382.2968 | 224.67 | 17.18 | 15.63 | 16.32 | 15.94 | 1.33 |
| 382.7959 | 68.47  | 15.98 | 15.38 | 15.92 | 16.05 | 0.67 |
| 382.8186 | 94.18  | 17.85 | 17.42 | 17.51 | 17.32 | 0.70 |
| 382.8243 | 76.47  | 13.41 | 11.32 | 13.57 | 13.32 | 0.70 |
| 382.8441 | 41.3   | 19.55 | 19.72 | 20.67 | 20.49 | 0.97 |
| 382.8631 | 69.32  | 14.75 | 11.12 | 14.60 | 14.93 | 0.95 |
| 382.8728 | 25.8   | 13.83 | 13.13 | 14.41 | 13.02 | 0.09 |
| 382.9149 | 32.43  | 14.73 | 15.51 | 16.15 | 15.61 | 0.84 |
| 382.9554 | 24.51  | 14.80 | 16.79 | 16.81 | 16.67 | 1.14 |
| 383.0149 | 40.63  | 14.11 | 16.85 | 14.23 | 13.83 | 0.85 |
| 383.0313 | 32.73  | 15.63 | 14.97 | 15.04 | 14.51 | 0.57 |
| 383.0522 | 17.11  | 15.62 | 18.60 | 18.79 | 17.77 | 1.72 |
| 383.0824 | 46.46  | 14.50 | 18.36 | 13.47 | 14.26 | 0.68 |
| 383.0907 | 22.07  | 17.05 | 17.78 | 18.37 | 18.22 | 1.24 |
| 383.1067 | 21.05  | 18.74 | 19.61 | 19.62 | 19.41 | 1.23 |
| 383.1156 | 22.4   | 18.95 | 19.13 | 19.01 | 19.06 | 0.41 |
| 383.2207 | 203.7  | 17.99 | 17.03 | 17.35 | 17.38 | 0.79 |
| 383.2431 | 176.84 | 15.56 | 13.65 | 16.39 | 14.79 | 0.40 |
| 383.2958 | 276.52 | 19.13 | 18.41 | 19.14 | 18.97 | 0.41 |
| 383.3173 | 291.52 | 14.45 | 15.32 | 15.67 | 14.58 | 0.54 |
| 383.8455 | 53.22  | 15.42 | 14.66 | 15.62 | 15.37 | 0.38 |
| 383.9370 | 30.69  | 17.64 | 18.30 | 18.43 | 17.60 | 0.79 |
| 384.0352 | 20.13  | 19.28 | 19.99 | 19.84 | 20.29 | 0.65 |
| 384.1191 | 23.42  | 15.16 | 14.49 | 13.85 | 14.45 | 0.49 |
| 384.2243 | 211.54 | 15.22 | 13.77 | 14.13 | 14.57 | 0.67 |
| 384.2572 | 168.13 | 17.97 | 17.70 | 17.96 | 17.57 | 0.15 |
| 384.2992 | 277.14 | 16.66 | 16.05 | 16.54 | 16.49 | 0.30 |
| 384.3128 | 242.84 | 17.66 | 17.46 | 17.86 | 17.06 | 0.12 |
| 384.8207 | 77.36  | 15.06 | 14.36 | 16.10 | 16.03 | 0.17 |
| 384.8409 | 56.6   | 16.08 | 15.42 | 17.08 | 16.81 | 0.19 |
| 384.8519 | 80.78  | 16.64 | 14.81 | 15.68 | 16.30 | 1.50 |

|          |        |       |       |       |       |      |
|----------|--------|-------|-------|-------|-------|------|
| 384.8909 | 49.23  | 15.07 | 15.41 | 14.91 | 14.82 | 0.04 |
| 384.9142 | 35.6   | 18.48 | 19.50 | 19.25 | 19.42 | 1.06 |
| 384.9361 | 42.57  | 19.31 | 21.79 | 21.68 | 21.66 | 1.65 |
| 384.9472 | 20.42  | 13.07 | 15.30 | 15.40 | 14.30 | 1.26 |
| 384.9723 | 38.82  | 15.49 | 13.65 | 13.25 | 14.46 | 1.00 |
| 384.9856 | 18.74  | 16.25 | 18.25 | 18.55 | 18.44 | 1.74 |
| 384.9965 | 54.43  | 15.06 | 16.44 | 16.67 | 16.14 | 0.79 |
| 385.0197 | 70.61  | 7.24  | 18.37 | 6.12  | 6.51  | 1.01 |
| 385.0419 | 20.95  | 15.30 | 15.31 | 14.41 | 15.52 | 0.15 |
| 385.0635 | 18.3   | 11.50 | 17.60 | 17.13 | 16.60 | 2.04 |
| 385.1792 | 204.57 | 18.22 | 19.12 | 19.50 | 19.08 | 1.24 |
| 385.1929 | 225.65 | 17.39 | 16.37 | 17.04 | 18.11 | 0.77 |
| 385.2003 | 57.71  | 16.23 | 14.53 | 15.67 | 15.99 | 0.59 |
| 385.2369 | 238.22 | 20.93 | 19.96 | 20.25 | 20.54 | 1.48 |
| 385.2611 | 190.64 | 16.73 | 16.61 | 17.13 | 16.35 | 0.05 |
| 385.3072 | 180.81 | 13.58 | 12.49 | 11.65 | 13.43 | 0.73 |
| 385.3117 | 299.95 | 14.79 | 17.60 | 18.04 | 16.89 | 1.38 |
| 385.9290 | 31.16  | 15.51 | 16.26 | 16.42 | 15.48 | 0.70 |
| 385.9395 | 42.51  | 15.21 | 17.38 | 17.24 | 17.31 | 1.55 |
| 386.0210 | 31.1   | 16.60 | 19.19 | 19.38 | 18.36 | 2.03 |
| 386.0346 | 18.21  | 16.63 | 21.40 | 20.83 | 21.14 | 2.11 |
| 386.0633 | 34.6   | 16.39 | 15.93 | 16.74 | 15.21 | 0.11 |
| 386.1498 | 25.26  | 12.63 | 13.30 | 13.99 | 12.50 | 0.60 |
| 386.1826 | 205.21 | 15.82 | 16.51 | 17.01 | 16.50 | 1.03 |
| 386.2377 | 154.52 | 20.06 | 19.78 | 20.12 | 19.80 | 0.19 |
| 386.2399 | 233.43 | 18.47 | 17.14 | 17.41 | 17.81 | 1.63 |
| 386.2716 | 189.17 | 17.03 | 16.46 | 17.20 | 16.62 | 0.25 |
| 386.2919 | 177.87 | 10.26 | 13.47 | 11.62 | 10.66 | 0.89 |
| 386.3149 | 297    | 14.31 | 14.69 | 15.21 | 14.43 | 0.40 |
| 386.3282 | 267.21 | 18.73 | 18.18 | 18.20 | 18.99 | 0.44 |
| 386.8017 | 63.77  | 15.50 | 15.09 | 16.96 | 16.29 | 0.54 |
| 386.8103 | 45.67  | 19.05 | 17.37 | 19.52 | 19.61 | 0.55 |
| 386.8304 | 91.35  | 13.60 | 14.26 | 14.95 | 14.62 | 1.09 |
| 386.8735 | 41.62  | 21.97 | 22.58 | 22.59 | 22.47 | 1.22 |
| 386.9128 | 56.05  | 14.58 | 13.01 | 12.02 | 13.35 | 0.72 |
| 386.9225 | 26.71  | 17.27 | 16.55 | 16.23 | 16.78 | 0.83 |
| 386.9309 | 37.41  | 18.57 | 19.51 | 19.42 | 19.53 | 1.41 |
| 386.9401 | 36.51  | 14.15 | 15.49 | 15.56 | 15.48 | 1.27 |
| 386.9803 | 33.8   | 14.81 | 15.28 | 15.02 | 14.95 | 0.32 |
| 387.0357 | 25.64  | 16.38 | 21.48 | 17.83 | 18.17 | 1.64 |
| 387.1153 | 142.57 | 16.21 | 14.93 | 16.33 | 14.78 | 0.37 |
| 387.1663 | 24.81  | 15.99 | 16.29 | 16.34 | 16.27 | 0.42 |
| 387.1773 | 205.42 | 14.26 | 14.24 | 14.45 | 14.40 | 0.05 |
| 387.1951 | 240.07 | 20.54 | 20.84 | 21.31 | 21.09 | 1.18 |
| 387.1954 | 25.51  | 16.56 | 14.81 | 15.79 | 17.53 | 0.48 |
| 387.2162 | 100.64 | 20.03 | 18.12 | 19.41 | 20.02 | 0.85 |
| 387.2409 | 164.11 | 17.78 | 17.52 | 17.86 | 17.44 | 0.17 |
| 387.2526 | 248.12 | 18.95 | 17.22 | 17.66 | 18.10 | 1.84 |
| 387.2762 | 222.74 | 21.47 | 20.71 | 20.46 | 20.40 | 0.81 |
| 387.2872 | 163.21 | 16.65 | 17.00 | 16.34 | 17.58 | 0.12 |
| 387.8769 | 41.53  | 17.35 | 17.97 | 17.92 | 17.66 | 1.02 |
| 387.9672 | 33.44  | 14.80 | 15.18 | 15.99 | 13.79 | 0.28 |
| 388.0339 | 26.94  | 13.75 | 19.02 | 16.58 | 17.13 | 1.89 |
| 388.1219 | 21.89  | 17.64 | 18.19 | 17.56 | 17.50 | 0.35 |
| 388.1984 | 238.17 | 17.73 | 18.39 | 18.83 | 18.53 | 1.64 |
| 388.1991 | 26.34  | 12.65 | 10.88 | 10.82 | 14.05 | 0.51 |
| 388.2196 | 99.91  | 17.57 | 15.23 | 16.97 | 17.58 | 0.79 |
| 388.2334 | 163.93 | 15.32 | 14.42 | 14.84 | 14.50 | 0.68 |
| 388.2534 | 173.98 | 21.22 | 20.76 | 20.88 | 20.51 | 0.46 |
| 388.2558 | 250.76 | 15.96 | 12.74 | 11.55 | 14.12 | 1.27 |
| 388.2711 | 176.16 | 12.58 | 12.90 | 13.73 | 13.11 | 0.49 |
| 388.2795 | 228.21 | 19.11 | 18.17 | 17.88 | 17.91 | 0.87 |

|          |        |       |       |       |       |      |
|----------|--------|-------|-------|-------|-------|------|
| 388.2898 | 166.97 | 14.66 | 13.74 | 13.08 | 14.91 | 0.66 |
| 388.3073 | 171.9  | 10.84 | 12.75 | 10.32 | 10.68 | 0.39 |
| 388.8108 | 58.3   | 21.27 | 21.69 | 21.73 | 21.67 | 0.98 |
| 388.8315 | 82.06  | 16.60 | 16.59 | 16.87 | 16.76 | 0.21 |
| 388.8501 | 79.86  | 16.03 | 14.57 | 15.20 | 15.07 | 1.40 |
| 388.8715 | 47.82  | 18.66 | 19.42 | 19.54 | 19.42 | 1.18 |
| 388.8891 | 45.36  | 21.59 | 22.91 | 22.87 | 22.76 | 1.97 |
| 388.9013 | 29.6   | 13.36 | 12.68 | 14.20 | 13.46 | 0.00 |
| 388.9212 | 24.8   | 16.79 | 16.20 | 16.21 | 16.28 | 0.66 |
| 389.0353 | 52.71  | 13.67 | 18.39 | 14.03 | 13.08 | 0.92 |
| 389.0768 | 197.6  | 18.69 | 17.81 | 18.15 | 17.76 | 1.77 |
| 389.0785 | 17.17  | 14.38 | 14.85 | 14.73 | 15.30 | 0.33 |
| 389.1271 | 17.36  | 20.35 | 20.79 | 20.67 | 20.42 | 0.43 |
| 389.1339 | 19.81  | 14.90 | 14.87 | 15.01 | 15.04 | 0.03 |
| 389.1673 | 26.18  | 16.31 | 15.20 | 15.52 | 15.18 | 1.05 |
| 389.1931 | 227.28 | 14.44 | 16.90 | 17.05 | 16.89 | 1.54 |
| 389.1959 | 60.74  | 15.49 | 12.01 | 14.80 | 15.87 | 0.64 |
| 389.2105 | 162.01 | 15.28 | 13.20 | 13.36 | 13.68 | 1.71 |
| 389.2106 | 256.12 | 18.09 | 17.80 | 18.37 | 18.25 | 0.02 |
| 389.2112 | 26.88  | 12.57 | 10.22 | 10.19 | 13.78 | 0.61 |
| 389.2316 | 213.15 | 10.69 | 9.46  | 12.64 | 14.14 | 0.17 |
| 389.2473 | 234.31 | 19.88 | 19.43 | 19.34 | 19.94 | 0.35 |
| 389.2562 | 173.61 | 19.45 | 18.27 | 18.52 | 18.24 | 1.04 |
| 389.2915 | 248.25 | 23.30 | 22.26 | 22.13 | 22.22 | 1.51 |
| 389.3097 | 285.4  | 17.05 | 17.29 | 16.76 | 18.01 | 0.14 |
| 389.8144 | 68.56  | 15.76 | 15.85 | 16.71 | 16.03 | 0.72 |
| 389.8926 | 40.75  | 16.72 | 18.43 | 18.36 | 18.23 | 1.96 |
| 389.9680 | 17.33  | 14.42 | 17.41 | 17.02 | 16.53 | 1.96 |
| 390.0506 | 41.46  | 14.34 | 14.60 | 14.36 | 13.42 | 0.01 |
| 390.0768 | 193.76 | 15.81 | 12.26 | 13.96 | 12.98 | 1.28 |
| 390.1200 | 21.64  | 15.69 | 15.44 | 15.28 | 15.49 | 0.26 |
| 390.2141 | 251.38 | 15.22 | 15.75 | 15.63 | 15.81 | 0.39 |
| 390.2397 | 189.28 | 16.01 | 16.67 | 17.23 | 15.70 | 0.67 |
| 390.2492 | 174.65 | 16.47 | 15.78 | 15.90 | 15.77 | 0.68 |
| 390.2506 | 234.28 | 16.81 | 16.38 | 15.92 | 16.95 | 0.28 |
| 390.2599 | 169.35 | 15.78 | 14.70 | 14.86 | 15.04 | 0.94 |
| 390.2689 | 177.98 | 20.70 | 20.36 | 20.47 | 19.78 | 0.49 |
| 390.2954 | 251.76 | 21.16 | 20.12 | 20.10 | 20.03 | 1.41 |
| 390.8092 | 68.79  | 19.32 | 19.51 | 19.98 | 19.55 | 0.84 |
| 390.8265 | 57.7   | 21.23 | 21.21 | 22.00 | 21.60 | 0.71 |
| 390.8643 | 69.47  | 15.76 | 14.03 | 15.13 | 15.36 | 1.33 |
| 390.8818 | 28.96  | 15.24 | 14.60 | 16.95 | 12.65 | 0.01 |
| 390.8885 | 39.83  | 18.57 | 19.88 | 19.87 | 19.83 | 1.95 |
| 390.8935 | 44.03  | 13.96 | 15.13 | 15.03 | 14.93 | 1.07 |
| 390.9020 | 31.25  | 17.44 | 19.07 | 19.15 | 19.03 | 1.41 |
| 390.9435 | 48.81  | 16.58 | 14.18 | 15.01 | 14.61 | 0.76 |
| 390.9535 | 21.05  | 14.74 | 14.57 | 14.19 | 14.81 | 0.20 |
| 390.9642 | 26.26  | 19.90 | 19.91 | 20.01 | 20.05 | 0.11 |
| 391.0216 | 206.08 | 16.21 | 15.97 | 16.06 | 15.88 | 0.25 |
| 391.0680 | 55.52  | 11.44 | 17.45 | 10.88 | 10.84 | 0.91 |
| 391.0898 | 53.81  | 15.64 | 18.93 | 14.75 | 15.05 | 0.76 |
| 391.1049 | 24.48  | 15.51 | 17.75 | 17.40 | 16.33 | 1.13 |
| 391.1242 | 17.46  | 18.56 | 18.95 | 18.88 | 18.55 | 0.39 |
| 391.1342 | 41.34  | 14.83 | 16.21 | 15.88 | 15.73 | 1.21 |
| 391.2133 | 69.43  | 18.86 | 18.13 | 18.84 | 19.12 | 0.24 |
| 391.2262 | 179.1  | 18.48 | 17.16 | 17.43 | 17.42 | 1.39 |
| 391.2263 | 285.49 | 11.84 | 17.09 | 17.24 | 16.60 | 1.85 |
| 391.2480 | 212.19 | 17.91 | 17.20 | 17.21 | 18.12 | 0.35 |
| 391.2629 | 252.14 | 21.25 | 20.89 | 20.51 | 21.16 | 0.44 |
| 391.2722 | 184.33 | 18.40 | 17.97 | 18.14 | 17.47 | 0.58 |
| 391.2862 | 39.67  | 15.78 | 15.59 | 15.07 | 15.61 | 0.21 |
| 391.2976 | 250.85 | 17.89 | 16.29 | 16.22 | 16.36 | 1.69 |

|          |        |       |       |       |       |      |
|----------|--------|-------|-------|-------|-------|------|
| 391.8303 | 67.04  | 16.31 | 15.36 | 16.84 | 16.44 | 0.37 |
| 391.8993 | 18.98  | 13.52 | 16.53 | 16.51 | 16.62 | 1.79 |
| 391.9672 | 28.22  | 15.38 | 16.20 | 16.69 | 15.88 | 0.90 |
| 391.9881 | 85.04  | 13.63 | 14.25 | 14.85 | 14.88 | 0.71 |
| 391.9977 | 18.68  | 14.89 | 15.94 | 15.60 | 15.61 | 0.62 |
| 392.0073 | 20.31  | 15.65 | 17.13 | 16.86 | 17.18 | 1.08 |
| 392.0410 | 24.15  | 15.80 | 13.39 | 12.43 | 14.10 | 1.22 |
| 392.0894 | 23.77  | 19.15 | 19.33 | 19.61 | 19.62 | 0.39 |
| 392.2169 | 86.49  | 15.96 | 15.35 | 16.02 | 16.33 | 0.10 |
| 392.2295 | 173.61 | 16.15 | 14.23 | 14.61 | 14.86 | 1.61 |
| 392.2661 | 252.1  | 18.77 | 18.20 | 17.79 | 18.61 | 0.56 |
| 392.2775 | 194.4  | 15.99 | 14.91 | 15.04 | 14.50 | 0.95 |
| 392.7878 | 94.77  | 13.15 | 12.56 | 13.13 | 13.58 | 0.22 |
| 392.8072 | 80.12  | 15.19 | 14.88 | 15.58 | 15.16 | 0.00 |
| 392.8184 | 61.15  | 17.12 | 15.25 | 16.34 | 17.13 | 1.17 |
| 392.8251 | 52.52  | 18.97 | 19.08 | 19.85 | 19.46 | 0.92 |
| 392.8785 | 49.87  | 16.47 | 19.02 | 18.96 | 18.48 | 1.87 |
| 392.9023 | 40.08  | 18.69 | 17.48 | 18.08 | 18.18 | 0.75 |
| 392.9230 | 46.13  | 17.84 | 18.76 | 19.23 | 18.99 | 1.40 |
| 392.9442 | 43.85  | 14.38 | 12.77 | 11.73 | 14.84 | 0.77 |
| 392.9528 | 29.64  | 13.11 | 14.16 | 14.07 | 14.03 | 0.58 |
| 392.9599 | 25.82  | 15.75 | 15.41 | 15.33 | 15.60 | 0.37 |
| 393.0101 | 19.46  | 16.70 | 18.63 | 18.14 | 17.76 | 1.28 |
| 393.0438 | 51.52  | 15.32 | 23.94 | 16.81 | 15.90 | 1.37 |
| 393.0687 | 47.11  | 15.39 | 19.50 | 14.33 | 14.62 | 0.77 |
| 393.0929 | 24.24  | 15.64 | 15.04 | 15.27 | 15.78 | 0.28 |
| 393.1614 | 82.9   | 13.04 | 10.85 | 14.12 | 14.83 | 0.14 |
| 393.1723 | 158.86 | 16.35 | 16.44 | 15.46 | 16.86 | 0.18 |
| 393.2292 | 68.86  | 15.37 | 14.41 | 15.12 | 16.19 | 0.20 |
| 393.2419 | 174.51 | 18.48 | 18.99 | 19.13 | 18.21 | 0.37 |
| 393.2612 | 250.4  | 19.40 | 18.81 | 18.39 | 19.27 | 0.62 |
| 393.2782 | 283.6  | 19.90 | 20.26 | 20.27 | 20.46 | 0.54 |
| 393.2787 | 22.5   | 16.32 | 14.53 | 13.78 | 14.26 | 1.04 |
| 393.8292 | 41.64  | 14.13 | 10.02 | 13.43 | 13.79 | 0.83 |
| 393.8940 | 35.38  | 14.26 | 13.47 | 13.66 | 14.05 | 0.32 |
| 393.9787 | 27.45  | 10.97 | 13.59 | 14.40 | 12.85 | 1.04 |
| 394.0513 | 62.35  | 9.97  | 20.90 | 7.86  | 8.17  | 0.75 |
| 394.0723 | 66.7   | 14.26 | 15.63 | 12.66 | 13.20 | 0.08 |
| 394.0844 | 26.16  | 13.94 | 13.83 | 14.45 | 14.22 | 0.12 |
| 394.1755 | 150.17 | 14.01 | 13.67 | 12.31 | 14.14 | 0.47 |
| 394.2097 | 63.44  | 12.91 | 15.93 | 10.94 | 11.60 | 0.30 |
| 394.2449 | 168.05 | 16.45 | 16.45 | 16.57 | 15.95 | 0.03 |
| 394.2630 | 252.45 | 16.79 | 15.83 | 15.58 | 16.41 | 0.59 |
| 394.2813 | 287.72 | 17.43 | 17.34 | 17.21 | 17.53 | 0.13 |
| 394.7558 | 85.84  | 15.78 | 16.35 | 16.84 | 16.73 | 0.99 |
| 394.8033 | 90.94  | 10.63 | 13.60 | 13.50 | 13.63 | 1.34 |
| 394.8157 | 69.64  | 16.36 | 13.89 | 15.61 | 15.90 | 1.48 |
| 394.8230 | 61.19  | 15.39 | 14.01 | 15.57 | 15.22 | 0.72 |
| 394.8365 | 51.8   | 16.18 | 15.14 | 16.22 | 14.77 | 0.41 |
| 394.8601 | 57.07  | 19.42 | 18.69 | 20.18 | 20.07 | 0.03 |
| 394.8805 | 72.26  | 14.77 | 10.33 | 14.74 | 15.02 | 0.73 |
| 394.8970 | 155.66 | 16.37 | 14.21 | 13.74 | 14.19 | 1.09 |
| 394.9582 | 32.95  | 14.94 | 12.68 | 12.08 | 13.93 | 1.17 |
| 395.0460 | 62.12  | 14.95 | 20.88 | 13.59 | 13.97 | 0.83 |
| 395.0534 | 63.47  | 13.63 | 15.82 | 11.59 | 12.29 | 0.07 |
| 395.0891 | 17.89  | 17.05 | 20.27 | 19.83 | 18.85 | 1.54 |
| 395.2210 | 231.2  | 21.00 | 20.49 | 21.22 | 21.53 | 0.20 |
| 395.2449 | 86.97  | 12.52 | 11.46 | 14.39 | 14.96 | 0.15 |
| 395.2469 | 192.68 | 16.57 | 15.78 | 16.20 | 16.21 | 0.57 |
| 395.2573 | 167.26 | 17.42 | 18.38 | 18.67 | 17.35 | 0.56 |
| 395.2750 | 284.12 | 18.23 | 18.34 | 18.37 | 18.67 | 0.20 |
| 395.8635 | 47.62  | 14.81 | 12.82 | 15.06 | 15.15 | 0.63 |

|          |        |       |       |       |       |      |
|----------|--------|-------|-------|-------|-------|------|
| 395.9143 | 31.54  | 14.71 | 15.49 | 15.45 | 15.13 | 0.70 |
| 395.9579 | 34.08  | 17.87 | 18.79 | 18.93 | 18.29 | 1.28 |
| 395.9811 | 36.36  | 13.47 | 14.77 | 14.37 | 16.52 | 0.75 |
| 395.9878 | 50.4   | 12.91 | 13.30 | 15.09 | 13.03 | 0.53 |
| 396.0197 | 24.73  | 16.65 | 15.74 | 15.86 | 16.02 | 1.08 |
| 396.0476 | 35.3   | 15.77 | 17.96 | 16.19 | 15.18 | 0.75 |
| 396.0920 | 17.01  | 14.11 | 16.65 | 15.98 | 15.55 | 1.29 |
| 396.1247 | 19.17  | 13.82 | 18.41 | 11.52 | 12.29 | 0.46 |
| 396.2242 | 231.11 | 18.89 | 18.30 | 19.08 | 19.38 | 0.27 |
| 396.2604 | 168.18 | 15.49 | 15.65 | 16.04 | 15.16 | 0.29 |
| 396.2782 | 272.5  | 15.85 | 15.72 | 16.32 | 15.78 | 0.05 |
| 396.7535 | 85.69  | 15.16 | 15.22 | 15.72 | 15.55 | 0.43 |
| 396.7717 | 75.96  | 15.65 | 15.40 | 16.32 | 16.21 | 0.28 |
| 396.7826 | 82.08  | 15.34 | 15.29 | 15.78 | 15.51 | 0.34 |
| 396.8318 | 39.01  | 15.52 | 15.80 | 14.64 | 14.88 | 0.28 |
| 396.8391 | 50.96  | 17.04 | 15.86 | 18.12 | 17.93 | 0.04 |
| 396.8475 | 29.7   | 15.53 | 16.39 | 16.88 | 15.88 | 1.00 |
| 396.8567 | 80.2   | 17.89 | 16.18 | 17.48 | 17.37 | 0.95 |
| 396.8676 | 30.2   | 14.78 | 13.45 | 14.17 | 13.86 | 0.56 |
| 396.9508 | 30.68  | 15.32 | 15.33 | 15.12 | 14.89 | 0.14 |
| 396.9829 | 57.64  | 13.92 | 14.56 | 16.53 | 16.45 | 0.98 |
| 396.9950 | 17.33  | 13.84 | 15.01 | 14.72 | 14.29 | 0.65 |
| 397.0410 | 19.59  | 15.51 | 16.00 | 16.59 | 16.44 | 0.67 |
| 397.1158 | 23.78  | 17.25 | 19.52 | 19.66 | 18.76 | 1.88 |
| 397.2055 | 208.71 | 15.59 | 15.17 | 15.22 | 15.40 | 0.36 |
| 397.2267 | 169.35 | 17.96 | 18.10 | 17.71 | 18.80 | 0.08 |
| 397.2268 | 288.13 | 13.36 | 17.78 | 18.38 | 16.60 | 1.99 |
| 397.2367 | 242.96 | 19.29 | 18.98 | 19.35 | 19.29 | 0.26 |
| 397.2600 | 222.48 | 19.64 | 19.32 | 19.29 | 19.32 | 0.29 |
| 397.3330 | 293.33 | 13.14 | 15.65 | 15.87 | 15.53 | 0.96 |
| 397.8953 | 36.79  | 16.30 | 16.27 | 16.30 | 15.51 | 0.11 |
| 397.9045 | 37.65  | 17.09 | 18.64 | 19.04 | 18.21 | 1.61 |
| 397.9530 | 34.81  | 14.57 | 14.33 | 14.63 | 14.05 | 0.14 |
| 397.9798 | 56.8   | 14.90 | 16.64 | 18.01 | 17.17 | 1.34 |
| 398.0179 | 18.81  | 15.96 | 16.55 | 16.43 | 16.70 | 0.64 |
| 398.0271 | 18.65  | 14.80 | 16.17 | 16.02 | 16.32 | 1.03 |
| 398.1191 | 23.37  | 13.25 | 15.06 | 15.36 | 14.16 | 1.28 |
| 398.2298 | 159.29 | 15.49 | 15.22 | 14.65 | 16.14 | 0.33 |
| 398.2399 | 249.54 | 16.67 | 16.03 | 16.22 | 16.43 | 0.56 |
| 398.2635 | 222.6  | 17.32 | 16.71 | 16.76 | 16.79 | 0.39 |
| 398.2821 | 245.34 | 16.68 | 13.26 | 13.34 | 12.83 | 1.65 |
| 398.2917 | 146.95 | 15.13 | 14.32 | 14.45 | 14.26 | 0.90 |
| 398.2918 | 257.82 | 16.43 | 15.49 | 14.81 | 14.89 | 0.64 |
| 398.3280 | 192.74 | 14.19 | 17.84 | 17.79 | 16.52 | 2.00 |
| 398.7693 | 78.57  | 14.78 | 13.69 | 14.81 | 14.74 | 0.57 |
| 398.7924 | 79.13  | 17.57 | 17.84 | 18.18 | 17.70 | 0.72 |
| 398.8371 | 58.49  | 15.43 | 14.45 | 15.96 | 15.94 | 0.20 |
| 398.8453 | 33.71  | 13.85 | 14.14 | 14.69 | 13.02 | 0.21 |
| 398.8471 | 146.75 | 15.68 | 12.11 | 10.47 | 13.31 | 1.33 |
| 398.8536 | 68.61  | 14.67 | 11.58 | 14.04 | 14.11 | 0.75 |
| 398.8872 | 33.98  | 14.42 | 15.67 | 15.83 | 15.27 | 0.91 |
| 398.9299 | 44.22  | 17.18 | 18.52 | 18.50 | 18.35 | 1.47 |
| 398.9516 | 42.67  | 18.19 | 19.81 | 19.75 | 19.86 | 1.41 |
| 398.9858 | 37.45  | 14.62 | 14.68 | 15.00 | 14.40 | 0.08 |
| 399.0475 | 20.51  | 14.87 | 14.76 | 15.06 | 14.36 | 0.03 |
| 399.0562 | 61.76  | 14.67 | 21.68 | 13.47 | 13.54 | 0.88 |
| 399.1201 | 20.79  | 15.06 | 16.84 | 17.06 | 17.40 | 1.22 |
| 399.1553 | 27.5   | 16.93 | 17.75 | 17.69 | 17.13 | 0.67 |
| 399.2211 | 238.56 | 18.65 | 18.26 | 18.58 | 18.84 | 0.34 |
| 399.2523 | 259.15 | 14.39 | 14.68 | 15.76 | 15.93 | 0.35 |
| 399.2759 | 244.86 | 23.29 | 23.41 | 23.15 | 23.01 | 0.03 |
| 399.9030 | 36.33  | 13.74 | 14.07 | 14.58 | 13.81 | 0.36 |

|          |        |       |       |       |       |      |
|----------|--------|-------|-------|-------|-------|------|
| 399.9108 | 37.09  | 17.23 | 17.53 | 17.75 | 16.85 | 0.25 |
| 399.9550 | 36.15  | 14.23 | 14.94 | 14.92 | 15.23 | 0.58 |
| 399.9781 | 61.22  | 13.63 | 12.39 | 14.23 | 14.42 | 0.22 |
| 400.0059 | 81.54  | 12.28 | 12.35 | 13.29 | 12.80 | 0.18 |
| 400.0141 | 17.35  | 14.02 | 13.37 | 14.94 | 14.86 | 0.07 |
| 400.0595 | 54.67  | 15.91 | 18.54 | 15.10 | 15.33 | 0.69 |
| 400.2794 | 238.84 | 21.22 | 21.17 | 20.90 | 20.85 | 0.19 |
| 400.2976 | 268.16 | 19.72 | 18.04 | 18.19 | 18.20 | 1.77 |
| 400.3434 | 190.24 | 14.57 | 18.25 | 18.16 | 17.06 | 2.21 |
| 400.7841 | 102.39 | 14.65 | 10.48 | 11.99 | 12.76 | 1.13 |
| 400.7886 | 83.82  | 14.16 | 14.39 | 14.71 | 13.74 | 0.23 |
| 400.8261 | 73.48  | 15.36 | 12.13 | 13.92 | 14.68 | 1.40 |
| 400.8698 | 24.47  | 14.59 | 16.09 | 15.48 | 15.24 | 0.97 |
| 400.8892 | 45.45  | 19.64 | 19.21 | 19.45 | 19.50 | 0.54 |
| 400.9100 | 39.64  | 20.88 | 22.97 | 22.95 | 22.83 | 1.85 |
| 400.9464 | 43.16  | 16.18 | 14.25 | 14.66 | 14.58 | 0.90 |
| 400.9933 | 69.36  | 12.63 | 18.32 | 11.48 | 11.21 | 0.75 |
| 401.0267 | 18.64  | 12.77 | 14.19 | 13.45 | 14.36 | 0.52 |
| 401.0535 | 55.41  | 13.95 | 16.99 | 12.20 | 12.94 | 0.37 |
| 401.1657 | 226.84 | 14.60 | 13.34 | 15.58 | 16.10 | 0.03 |
| 401.1732 | 54.82  | 16.88 | 13.61 | 15.38 | 16.15 | 0.87 |
| 401.2105 | 232.91 | 19.21 | 18.95 | 19.38 | 19.03 | 0.14 |
| 401.2365 | 248.34 | 18.14 | 16.70 | 17.18 | 17.72 | 1.05 |
| 401.2825 | 234.57 | 17.15 | 16.41 | 15.35 | 15.58 | 0.49 |
| 401.2914 | 259.43 | 24.03 | 24.02 | 23.75 | 23.74 | 0.12 |
| 401.9030 | 31.84  | 15.83 | 15.95 | 16.34 | 15.51 | 0.14 |
| 401.9133 | 40.52  | 16.20 | 18.80 | 18.85 | 18.58 | 1.76 |
| 401.9228 | 27.99  | 16.01 | 17.71 | 17.78 | 17.75 | 1.73 |
| 401.9416 | 35.68  | 13.36 | 14.03 | 14.21 | 14.12 | 0.62 |
| 401.9956 | 34.7   | 16.79 | 19.61 | 19.83 | 18.64 | 2.14 |
| 402.1177 | 174.59 | 14.78 | 12.09 | 13.00 | 13.92 | 1.26 |
| 402.1658 | 25.08  | 16.07 | 16.71 | 16.46 | 16.35 | 0.54 |
| 402.2139 | 233.6  | 15.43 | 15.62 | 16.33 | 15.58 | 0.25 |
| 402.2949 | 257.63 | 22.01 | 21.85 | 21.58 | 21.69 | 0.26 |
| 402.3132 | 294.28 | 14.53 | 14.66 | 15.81 | 14.87 | 0.29 |
| 402.8001 | 100.51 | 16.49 | 14.98 | 14.88 | 15.31 | 1.53 |
| 402.8266 | 77.4   | 18.46 | 18.47 | 18.81 | 18.56 | 0.37 |
| 402.8474 | 50.44  | 22.42 | 22.42 | 22.97 | 22.84 | 0.65 |
| 402.8668 | 77.46  | 13.81 | 13.14 | 13.52 | 13.42 | 0.34 |
| 402.8845 | 158.25 | 15.17 | 9.42  | 8.95  | 12.02 | 1.66 |
| 402.8966 | 26.93  | 17.06 | 13.94 | 13.70 | 14.90 | 1.33 |
| 402.9053 | 46.04  | 19.62 | 20.10 | 20.20 | 20.27 | 1.06 |
| 402.9147 | 44.38  | 14.47 | 15.72 | 15.67 | 15.60 | 1.34 |
| 402.9269 | 27.83  | 13.60 | 14.58 | 14.69 | 14.36 | 0.79 |
| 402.9960 | 18.95  | 19.34 | 20.65 | 20.68 | 20.89 | 1.30 |
| 403.0111 | 47.46  | 12.39 | 21.45 | 14.59 | 14.86 | 1.39 |
| 403.0492 | 31.87  | 16.52 | 15.86 | 16.31 | 16.40 | 0.49 |
| 403.1494 | 19.67  | 16.58 | 18.13 | 18.09 | 18.08 | 1.52 |
| 403.1900 | 89.7   | 19.72 | 19.40 | 20.64 | 20.83 | 0.26 |
| 403.2261 | 250.9  | 17.31 | 16.26 | 16.69 | 16.66 | 1.09 |
| 403.2524 | 274.63 | 17.26 | 16.61 | 17.31 | 18.11 | 0.12 |
| 403.2705 | 200.87 | 17.01 | 15.96 | 15.78 | 15.65 | 1.24 |
| 403.2892 | 221.28 | 17.64 | 17.00 | 16.76 | 17.31 | 0.77 |
| 403.2977 | 252.9  | 18.80 | 18.44 | 18.29 | 18.45 | 0.35 |
| 403.3069 | 280.42 | 22.05 | 22.37 | 22.49 | 22.26 | 0.55 |
| 403.3072 | 56.51  | 20.68 | 18.96 | 19.71 | 19.70 | 1.38 |
| 403.8508 | 55.83  | 17.95 | 17.47 | 18.22 | 18.28 | 0.16 |
| 403.9001 | 32.74  | 14.01 | 12.24 | 13.61 | 13.10 | 0.44 |
| 403.9087 | 48.05  | 14.88 | 13.16 | 14.24 | 15.03 | 0.76 |
| 404.0133 | 41.54  | 15.57 | 18.34 | 14.36 | 15.71 | 0.39 |
| 404.0452 | 18.86  | 19.52 | 20.86 | 20.33 | 19.69 | 0.69 |
| 404.0548 | 18.54  | 17.07 | 20.24 | 19.74 | 19.24 | 1.46 |



|          |        |       |       |       |       |      |
|----------|--------|-------|-------|-------|-------|------|
| 404.1204 | 26.38  | 12.53 | 13.79 | 11.82 | 11.64 | 0.16 |
| 404.1323 | 17.06  | 14.31 | 16.95 | 17.41 | 17.39 | 1.43 |
| 404.1933 | 84.74  | 17.36 | 16.89 | 18.38 | 18.61 | 0.22 |
| 404.2657 | 95.53  | 14.45 | 16.06 | 14.97 | 14.88 | 0.68 |
| 404.2844 | 182.76 | 15.04 | 13.47 | 13.51 | 13.26 | 1.13 |
| 404.3015 | 259.21 | 19.26 | 18.09 | 17.28 | 18.19 | 1.54 |
| 404.3102 | 283.19 | 19.89 | 20.32 | 20.47 | 20.20 | 0.71 |
| 404.7848 | 70.08  | 19.72 | 20.45 | 20.89 | 20.45 | 1.29 |
| 404.7977 | 93.22  | 14.82 | 13.59 | 13.51 | 14.01 | 0.98 |
| 404.8057 | 76.16  | 17.23 | 17.83 | 18.28 | 17.84 | 1.28 |
| 404.8248 | 83.64  | 16.19 | 15.90 | 16.39 | 16.08 | 0.17 |
| 404.8477 | 41.07  | 20.15 | 19.82 | 20.24 | 20.53 | 0.08 |
| 404.8629 | 45.27  | 22.00 | 22.77 | 23.12 | 22.98 | 1.87 |
| 404.8722 | 31.23  | 13.26 | 12.94 | 14.14 | 12.19 | 0.03 |
| 404.8998 | 41.13  | 17.59 | 16.65 | 16.92 | 16.85 | 0.96 |
| 404.9999 | 23.21  | 15.27 | 16.77 | 16.82 | 17.06 | 1.29 |
| 405.0073 | 67.69  | 16.40 | 18.74 | 15.72 | 15.89 | 0.72 |
| 405.0272 | 48.68  | 14.27 | 14.24 | 13.88 | 13.01 | 0.18 |
| 405.0487 | 21.46  | 17.06 | 19.03 | 18.77 | 18.53 | 1.66 |
| 405.1266 | 61.76  | 13.17 | 15.97 | 11.00 | 11.80 | 0.19 |
| 405.1876 | 80.09  | 15.38 | 14.29 | 16.11 | 16.47 | 0.07 |
| 405.2051 | 110.41 | 11.79 | 13.36 | 15.27 | 15.56 | 0.86 |
| 405.2061 | 19.72  | 16.63 | 15.14 | 15.90 | 17.63 | 0.43 |
| 405.2866 | 233.48 | 19.99 | 19.25 | 19.47 | 19.20 | 0.76 |
| 405.3050 | 237.87 | 17.37 | 17.14 | 15.81 | 16.34 | 0.30 |
| 405.3131 | 287.02 | 17.36 | 17.03 | 16.87 | 16.58 | 0.51 |
| 405.7880 | 78.72  | 13.51 | 14.26 | 15.30 | 14.79 | 0.93 |
| 405.8486 | 63.66  | 14.89 | 14.65 | 14.60 | 14.52 | 0.25 |
| 405.8663 | 52.77  | 17.47 | 18.17 | 18.69 | 18.47 | 1.75 |
| 406.0193 | 33.03  | 17.72 | 17.10 | 16.93 | 17.72 | 0.43 |
| 406.0410 | 18.62  | 15.82 | 16.67 | 16.11 | 15.88 | 0.42 |
| 406.0502 | 18.84  | 13.96 | 15.91 | 15.34 | 14.67 | 0.86 |
| 406.0674 | 18.36  | 14.40 | 16.34 | 16.14 | 15.87 | 1.23 |
| 406.0767 | 18.34  | 13.43 | 15.80 | 15.44 | 16.09 | 1.25 |
| 406.2424 | 171.3  | 16.20 | 14.56 | 14.86 | 15.32 | 1.11 |
| 406.2731 | 197.42 | 14.69 | 13.65 | 13.52 | 13.88 | 0.81 |
| 406.2899 | 286.68 | 17.89 | 18.24 | 18.33 | 18.28 | 0.69 |
| 406.7829 | 70.09  | 18.00 | 18.75 | 19.30 | 18.78 | 1.38 |
| 406.8004 | 66.79  | 19.99 | 20.45 | 21.13 | 20.71 | 1.16 |
| 406.8241 | 88.33  | 14.19 | 13.49 | 13.35 | 14.07 | 0.67 |
| 406.8398 | 64.78  | 15.88 | 14.23 | 15.49 | 15.26 | 1.24 |
| 406.8623 | 48.48  | 19.59 | 20.30 | 20.75 | 20.58 | 1.81 |
| 406.8759 | 36.2   | 18.77 | 19.92 | 20.02 | 19.90 | 1.68 |
| 406.8937 | 28.13  | 15.26 | 17.18 | 16.73 | 16.89 | 1.30 |
| 406.9176 | 49.27  | 16.66 | 14.12 | 14.78 | 15.16 | 1.04 |
| 406.9381 | 28.66  | 18.13 | 16.56 | 16.66 | 17.07 | 0.84 |
| 406.9678 | 21.9   | 15.31 | 18.34 | 18.63 | 17.78 | 1.93 |
| 406.9800 | 30.97  | 16.34 | 16.30 | 16.17 | 16.16 | 0.21 |
| 407.0638 | 54.56  | 15.97 | 18.71 | 15.22 | 15.44 | 0.76 |
| 407.1003 | 23.65  | 17.12 | 17.62 | 18.06 | 17.51 | 0.65 |
| 407.1086 | 47.83  | 10.96 | 15.25 | 14.64 | 14.56 | 1.74 |
| 407.1875 | 168.56 | 13.38 | 12.97 | 11.98 | 13.64 | 0.39 |
| 407.2062 | 30.73  | 14.97 | 14.24 | 13.96 | 15.53 | 0.31 |
| 407.2209 | 178.15 | 16.13 | 14.08 | 13.65 | 13.96 | 1.68 |
| 407.2458 | 171.3  | 14.01 | 11.42 | 12.09 | 12.06 | 1.00 |
| 407.2958 | 272.15 | 17.57 | 16.76 | 17.29 | 17.40 | 0.39 |
| 407.3169 | 191.41 | 13.71 | 15.32 | 15.68 | 14.84 | 1.17 |
| 407.8038 | 70.87  | 14.79 | 14.12 | 15.68 | 15.29 | 0.07 |
| 407.8674 | 38.52  | 14.48 | 14.99 | 15.20 | 15.13 | 0.41 |
| 407.9620 | 81.93  | 13.34 | 15.44 | 15.36 | 15.90 | 1.24 |
| 408.0935 | 24.14  | 14.33 | 15.81 | 16.78 | 16.03 | 1.42 |
| 408.1493 | 23.99  | 16.38 | 16.64 | 16.63 | 16.24 | 0.13 |

|          |        |       |       |       |       |      |
|----------|--------|-------|-------|-------|-------|------|
| 408.2221 | 138.66 | 14.90 | 13.98 | 14.08 | 13.91 | 0.62 |
| 408.2522 | 191.79 | 17.39 | 16.77 | 16.73 | 16.13 | 0.80 |
| 408.7810 | 78.11  | 14.73 | 14.50 | 15.36 | 14.70 | 0.16 |
| 408.7923 | 64.32  | 17.42 | 15.62 | 17.60 | 17.70 | 0.73 |
| 408.7993 | 64.45  | 17.64 | 18.17 | 19.10 | 18.58 | 1.13 |
| 408.8528 | 52.37  | 16.80 | 18.04 | 18.73 | 18.34 | 1.23 |
| 408.8760 | 148.44 | 17.13 | 15.08 | 14.60 | 15.63 | 1.85 |
| 408.8967 | 53.13  | 17.30 | 17.48 | 18.52 | 18.24 | 0.83 |
| 408.9340 | 35.25  | 15.98 | 16.17 | 15.33 | 15.58 | 0.13 |
| 409.0153 | 49.51  | 15.37 | 15.24 | 17.28 | 17.08 | 0.59 |
| 409.0429 | 64.18  | 14.50 | 20.99 | 12.88 | 13.34 | 0.79 |
| 409.1087 | 171.43 | 16.62 | 15.95 | 15.95 | 16.18 | 1.33 |
| 409.1463 | 144.45 | 13.19 | 16.16 | 15.11 | 15.21 | 1.04 |
| 409.1869 | 65.26  | 14.43 | 16.18 | 13.08 | 13.46 | 0.17 |
| 409.1978 | 99.91  | 15.10 | 10.73 | 13.39 | 14.37 | 1.22 |
| 409.2368 | 227.44 | 19.90 | 18.14 | 18.89 | 19.33 | 1.70 |
| 409.2587 | 191.63 | 15.80 | 14.66 | 14.56 | 14.90 | 1.12 |
| 409.3079 | 165.43 | 12.87 | 11.74 | 11.58 | 11.77 | 0.68 |
| 409.9528 | 32.7   | 12.66 | 14.16 | 15.06 | 14.22 | 0.95 |
| 409.9741 | 31.48  | 15.37 | 15.53 | 15.59 | 15.41 | 0.19 |
| 410.0466 | 65.78  | 15.35 | 17.64 | 14.31 | 14.64 | 0.51 |
| 410.1120 | 171.79 | 14.49 | 12.91 | 12.86 | 12.93 | 1.60 |
| 410.1285 | 23.02  | 19.63 | 19.60 | 19.96 | 19.96 | 0.19 |
| 410.1839 | 64.16  | 13.02 | 17.88 | 11.06 | 11.86 | 0.59 |
| 410.2222 | 174.32 | 17.75 | 18.03 | 18.12 | 17.56 | 0.29 |
| 410.2383 | 165.47 | 19.00 | 18.67 | 19.30 | 19.02 | 0.06 |
| 410.2394 | 227.03 | 17.44 | 15.48 | 16.23 | 16.48 | 1.60 |
| 410.7900 | 71.1   | 16.61 | 15.08 | 16.16 | 16.78 | 1.12 |
| 410.7971 | 63.59  | 15.00 | 14.49 | 15.01 | 14.53 | 0.35 |
| 410.8545 | 66.67  | 15.05 | 12.11 | 14.29 | 14.47 | 1.12 |
| 410.8711 | 144.46 | 15.15 | 14.76 | 14.72 | 14.67 | 0.30 |
| 410.8921 | 43.04  | 18.41 | 19.57 | 19.05 | 19.09 | 0.90 |
| 411.0411 | 65.77  | 8.45  | 17.59 | 7.75  | 8.37  | 1.07 |
| 411.1317 | 23.4   | 16.12 | 16.27 | 16.46 | 16.21 | 0.22 |
| 411.1951 | 231.56 | 19.60 | 19.79 | 20.63 | 20.41 | 1.07 |
| 411.2089 | 34.08  | 13.96 | 14.98 | 12.46 | 12.85 | 0.19 |
| 411.2160 | 95.92  | 16.35 | 13.79 | 16.21 | 16.68 | 0.71 |
| 411.2257 | 180.46 | 15.38 | 15.51 | 15.59 | 14.94 | 0.08 |
| 411.2416 | 162.28 | 17.55 | 16.93 | 17.45 | 17.52 | 0.52 |
| 411.2525 | 244.09 | 18.41 | 17.32 | 17.70 | 17.58 | 1.33 |
| 411.2758 | 227.33 | 19.42 | 18.50 | 18.49 | 18.39 | 0.82 |
| 411.7509 | 290.57 | 14.30 | 17.07 | 16.71 | 15.84 | 1.68 |
| 411.9319 | 36.07  | 18.47 | 18.92 | 19.35 | 18.45 | 0.51 |
| 411.9506 | 22.17  | 14.12 | 18.27 | 18.17 | 17.99 | 2.04 |
| 411.9836 | 26.18  | 13.59 | 14.46 | 15.04 | 13.74 | 0.53 |
| 412.0198 | 30.32  | 15.87 | 15.65 | 15.97 | 15.55 | 0.10 |
| 412.0325 | 23.62  | 15.01 | 15.42 | 15.60 | 15.89 | 0.43 |
| 412.1242 | 23.61  | 15.53 | 15.00 | 15.58 | 15.28 | 0.19 |
| 412.1985 | 226.82 | 17.19 | 17.47 | 18.48 | 18.17 | 1.12 |
| 412.2194 | 178.64 | 16.05 | 16.21 | 16.23 | 15.87 | 0.15 |
| 412.2336 | 158.27 | 13.80 | 12.15 | 13.40 | 13.53 | 0.74 |
| 412.2534 | 171.7  | 16.40 | 15.50 | 16.10 | 15.77 | 0.81 |
| 412.2793 | 222.75 | 17.14 | 16.11 | 15.95 | 16.07 | 0.88 |
| 412.3075 | 182.28 | 10.60 | 13.77 | 12.56 | 11.98 | 0.99 |
| 412.8099 | 66.12  | 16.23 | 14.20 | 14.81 | 14.74 | 1.44 |
| 412.8228 | 42.47  | 15.97 | 15.76 | 16.57 | 15.48 | 0.06 |
| 412.8418 | 31.64  | 13.18 | 13.48 | 14.88 | 14.65 | 0.38 |
| 412.8847 | 27.05  | 16.10 | 17.22 | 17.22 | 17.06 | 0.95 |
| 412.9458 | 36.16  | 14.67 | 15.38 | 14.80 | 15.29 | 0.37 |
| 412.9674 | 38.53  | 16.81 | 17.36 | 17.44 | 17.37 | 0.62 |
| 413.0020 | 27.66  | 13.21 | 15.25 | 14.11 | 14.93 | 0.76 |
| 413.0724 | 37.05  | 14.59 | 17.28 | 15.10 | 14.62 | 0.80 |

|          |        |       |       |       |       |      |
|----------|--------|-------|-------|-------|-------|------|
| 413.1933 | 210.36 | 14.09 | 13.52 | 15.80 | 15.86 | 0.36 |
| 413.2103 | 239.38 | 17.20 | 18.13 | 18.88 | 17.98 | 0.93 |
| 413.2293 | 185.19 | 15.91 | 13.91 | 14.83 | 15.34 | 0.83 |
| 413.2474 | 236.82 | 19.98 | 20.46 | 20.52 | 20.42 | 0.37 |
| 413.2916 | 234.85 | 23.47 | 23.07 | 22.83 | 22.70 | 0.46 |
| 413.8785 | 31.44  | 16.62 | 16.22 | 16.78 | 16.49 | 0.14 |
| 413.9285 | 36.15  | 14.56 | 14.41 | 13.74 | 13.87 | 0.30 |
| 413.9418 | 34.94  | 13.68 | 12.87 | 13.76 | 13.18 | 0.29 |
| 413.9627 | 34.22  | 13.08 | 14.72 | 14.55 | 14.42 | 0.84 |
| 414.0442 | 22.18  | 17.57 | 19.21 | 19.15 | 18.82 | 1.62 |
| 414.0712 | 26.46  | 18.06 | 16.73 | 17.46 | 17.33 | 0.98 |
| 414.1487 | 26.63  | 13.79 | 15.97 | 16.02 | 14.45 | 1.64 |
| 414.2141 | 244.32 | 14.12 | 15.00 | 15.91 | 14.17 | 0.66 |
| 414.2510 | 237.21 | 17.34 | 17.93 | 17.95 | 17.97 | 0.37 |
| 414.2689 | 172.64 | 16.11 | 15.59 | 15.95 | 15.44 | 0.44 |
| 414.2865 | 182.97 | 12.93 | 12.82 | 14.16 | 13.67 | 0.30 |
| 414.2951 | 239.27 | 21.48 | 20.91 | 20.67 | 20.59 | 0.63 |
| 414.7666 | 90.04  | 16.33 | 17.73 | 17.80 | 17.27 | 1.61 |
| 414.8217 | 72.69  | 14.27 | 14.15 | 14.11 | 13.81 | 0.09 |
| 414.8608 | 49.9   | 11.57 | 15.24 | 14.46 | 14.45 | 1.16 |
| 414.8815 | 39.43  | 12.42 | 13.00 | 14.32 | 13.01 | 0.42 |
| 414.9033 | 44.6   | 17.93 | 19.20 | 19.18 | 19.13 | 1.80 |
| 414.9257 | 40.17  | 19.64 | 20.83 | 20.86 | 20.88 | 1.60 |
| 415.0300 | 63.21  | 12.33 | 23.36 | 11.14 | 10.45 | 0.92 |
| 415.0415 | 19.68  | 16.07 | 16.65 | 16.55 | 16.85 | 0.44 |
| 415.2252 | 174.32 | 16.45 | 15.32 | 15.55 | 15.94 | 0.72 |
| 415.2264 | 259.37 | 11.41 | 13.80 | 15.50 | 14.85 | 1.03 |
| 415.2455 | 217.45 | 18.20 | 18.73 | 18.79 | 19.22 | 0.48 |
| 415.2629 | 242.77 | 14.63 | 17.00 | 16.38 | 16.60 | 0.84 |
| 415.3072 | 257.97 | 24.43 | 23.91 | 23.63 | 23.59 | 0.50 |
| 415.3193 | 202.92 | 14.58 | 15.47 | 14.44 | 16.13 | 0.25 |
| 415.8752 | 39.01  | 12.85 | 14.37 | 14.09 | 13.65 | 0.64 |
| 415.8848 | 37.72  | 16.13 | 15.36 | 15.85 | 14.73 | 0.39 |
| 415.9291 | 45.24  | 15.03 | 16.47 | 16.45 | 16.61 | 1.38 |
| 416.0113 | 30.08  | 13.02 | 14.32 | 15.13 | 13.73 | 1.24 |
| 416.0336 | 63.15  | 12.84 | 20.28 | 10.89 | 11.36 | 0.75 |
| 416.2828 | 205.06 | 17.84 | 17.56 | 17.89 | 17.32 | 0.21 |
| 416.3105 | 257.31 | 22.46 | 21.78 | 21.51 | 21.51 | 0.64 |
| 416.7581 | 98.9   | 15.15 | 14.17 | 14.65 | 14.87 | 0.96 |
| 416.8419 | 149.96 | 15.10 | 13.59 | 12.75 | 14.76 | 0.99 |
| 416.8631 | 49.93  | 20.09 | 18.78 | 20.17 | 20.14 | 0.90 |
| 416.8841 | 41.63  | 21.53 | 23.34 | 23.46 | 23.30 | 1.91 |
| 416.8968 | 31.13  | 14.38 | 13.80 | 14.98 | 13.53 | 0.10 |
| 416.9219 | 45.26  | 16.84 | 16.33 | 16.36 | 16.70 | 0.56 |
| 417.0124 | 33.79  | 14.52 | 15.24 | 15.34 | 15.15 | 0.67 |
| 417.0283 | 63.11  | 14.22 | 20.27 | 12.45 | 12.97 | 0.73 |
| 417.0486 | 45.72  | 13.96 | 13.61 | 14.31 | 12.98 | 0.08 |
| 417.2058 | 92.68  | 13.11 | 9.41  | 13.34 | 14.41 | 0.45 |
| 417.2104 | 180.73 | 16.85 | 17.54 | 17.04 | 17.67 | 0.54 |
| 417.2419 | 182.74 | 17.42 | 15.76 | 16.05 | 16.19 | 1.56 |
| 417.2652 | 229.23 | 16.80 | 16.48 | 17.29 | 17.17 | 0.09 |
| 417.2865 | 192.16 | 18.87 | 17.18 | 17.55 | 17.60 | 1.54 |
| 417.3138 | 252.23 | 19.27 | 18.45 | 18.02 | 18.20 | 0.73 |
| 417.3226 | 277.37 | 23.48 | 23.31 | 23.44 | 23.13 | 0.24 |
| 417.8664 | 64.77  | 14.86 | 12.79 | 14.18 | 14.02 | 0.92 |
| 417.8771 | 32.62  | 15.69 | 14.27 | 14.83 | 14.30 | 0.53 |
| 417.8874 | 48.06  | 17.14 | 19.22 | 19.39 | 19.21 | 1.89 |
| 417.8979 | 32.28  | 16.53 | 17.33 | 17.51 | 16.95 | 0.77 |
| 417.9157 | 38.13  | 13.81 | 13.34 | 13.62 | 13.41 | 0.22 |
| 417.9394 | 19.71  | 14.27 | 18.01 | 17.99 | 17.57 | 1.72 |
| 417.9687 | 39.49  | 15.67 | 18.54 | 18.90 | 17.44 | 1.65 |
| 418.0019 | 25.72  | 20.20 | 19.51 | 19.62 | 19.46 | 0.93 |

|          |        |       |       |       |       |      |
|----------|--------|-------|-------|-------|-------|------|
| 418.0119 | 35.11  | 15.08 | 14.98 | 15.46 | 15.19 | 0.08 |
| 418.0298 | 39.28  | 11.55 | 16.54 | 14.22 | 12.19 | 1.34 |
| 418.0456 | 46.38  | 14.34 | 15.89 | 16.17 | 14.37 | 1.04 |
| 418.2141 | 182.28 | 14.20 | 14.97 | 13.95 | 15.24 | 0.26 |
| 418.2451 | 183.9  | 15.26 | 12.04 | 12.23 | 12.79 | 1.73 |
| 418.2569 | 74.92  | 14.27 | 18.01 | 12.67 | 13.19 | 0.55 |
| 418.2809 | 191.22 | 14.64 | 14.31 | 12.99 | 14.25 | 0.51 |
| 418.2995 | 194.95 | 16.71 | 16.41 | 16.45 | 15.75 | 0.44 |
| 418.3084 | 269.79 | 18.31 | 17.80 | 17.81 | 17.91 | 0.47 |
| 418.3164 | 252.13 | 16.02 | 14.27 | 12.51 | 14.56 | 0.95 |
| 418.3260 | 270.97 | 21.35 | 21.26 | 21.38 | 21.01 | 0.14 |
| 418.7561 | 96.9   | 14.10 | 12.99 | 13.47 | 13.54 | 0.72 |
| 418.7735 | 89.84  | 16.27 | 16.02 | 16.40 | 16.05 | 0.17 |
| 418.8007 | 71.07  | 16.14 | 16.73 | 17.15 | 16.77 | 0.94 |
| 418.8215 | 53.35  | 22.23 | 22.26 | 23.05 | 22.81 | 0.93 |
| 418.8413 | 71.93  | 15.87 | 15.11 | 16.53 | 16.23 | 0.10 |
| 418.8584 | 156.41 | 16.42 | 14.39 | 14.22 | 14.72 | 1.12 |
| 418.8801 | 41.85  | 20.25 | 20.64 | 21.02 | 20.98 | 1.40 |
| 418.9740 | 47.08  | 13.43 | 15.09 | 14.63 | 14.22 | 0.98 |
| 418.9860 | 69.35  | 13.85 | 14.60 | 14.98 | 15.52 | 0.76 |
| 419.0044 | 26.85  | 16.35 | 15.36 | 15.22 | 15.32 | 1.11 |
| 419.0232 | 36.11  | 15.91 | 14.83 | 14.21 | 14.64 | 0.62 |
| 419.0450 | 22.36  | 15.26 | 14.76 | 14.38 | 15.13 | 0.33 |
| 419.2059 | 30     | 15.91 | 14.03 | 15.15 | 16.88 | 0.49 |
| 419.2069 | 175.08 | 10.89 | 11.34 | 11.45 | 12.44 | 0.24 |
| 419.2572 | 187.05 | 17.81 | 16.29 | 16.74 | 16.70 | 1.36 |
| 419.2834 | 211.29 | 16.89 | 16.04 | 15.88 | 16.08 | 0.78 |
| 419.3024 | 16.74  | 15.05 | 11.80 | 11.63 | 12.34 | 1.97 |
| 419.3027 | 197.65 | 16.04 | 14.10 | 13.94 | 14.54 | 1.64 |
| 419.3287 | 282    | 17.96 | 17.71 | 17.96 | 17.55 | 0.23 |
| 419.8248 | 53.25  | 17.80 | 16.92 | 18.65 | 18.37 | 0.04 |
| 419.8843 | 49.17  | 15.01 | 14.99 | 15.42 | 15.59 | 0.35 |
| 419.9828 | 62.3   | 14.98 | 14.95 | 16.41 | 16.58 | 0.52 |
| 419.9979 | 26.2   | 16.74 | 15.94 | 15.85 | 16.02 | 1.07 |
| 420.0484 | 21.72  | 16.16 | 16.41 | 15.59 | 15.34 | 0.13 |
| 420.1882 | 176.7  | 17.81 | 17.92 | 17.95 | 18.16 | 0.18 |
| 420.2511 | 175.14 | 22.01 | 22.34 | 22.34 | 21.46 | 0.25 |
| 420.2603 | 187.27 | 14.60 | 10.09 | 10.93 | 12.46 | 1.45 |
| 420.3238 | 297.09 | 15.06 | 14.45 | 15.19 | 14.83 | 0.20 |
| 420.7719 | 93.08  | 14.74 | 13.28 | 14.37 | 14.22 | 1.04 |
| 420.7799 | 74.17  | 15.91 | 17.24 | 17.71 | 17.11 | 1.48 |
| 420.7995 | 86.91  | 15.00 | 15.24 | 15.85 | 15.38 | 0.61 |
| 420.8196 | 61.22  | 20.35 | 20.30 | 21.13 | 20.88 | 0.80 |
| 420.8371 | 49.08  | 21.76 | 22.09 | 22.82 | 22.62 | 1.36 |
| 420.8768 | 53.09  | 17.15 | 16.74 | 17.36 | 17.35 | 0.19 |
| 420.8918 | 33.23  | 14.75 | 14.83 | 15.33 | 15.45 | 0.27 |
| 420.9315 | 26.65  | 13.00 | 12.37 | 13.66 | 13.71 | 0.01 |
| 420.9753 | 67.93  | 13.18 | 16.39 | 10.90 | 11.59 | 0.23 |
| 421.0019 | 28.14  | 17.58 | 21.06 | 20.63 | 19.86 | 1.77 |
| 421.0403 | 18.42  | 13.70 | 17.03 | 17.25 | 17.04 | 1.63 |
| 421.0767 | 19.15  | 14.03 | 16.95 | 15.23 | 14.78 | 0.81 |
| 421.1006 | 62.49  | 15.18 | 18.36 | 14.06 | 14.38 | 0.64 |
| 421.1557 | 178.22 | 14.00 | 13.28 | 13.75 | 14.14 | 0.51 |
| 421.1910 | 142.53 | 15.13 | 14.04 | 14.45 | 15.43 | 0.70 |
| 421.2264 | 168.32 | 19.18 | 17.17 | 17.42 | 18.51 | 1.45 |
| 421.2572 | 202.92 | 20.59 | 20.89 | 21.16 | 20.34 | 0.33 |
| 421.2730 | 181.63 | 15.71 | 16.10 | 15.82 | 15.74 | 0.19 |
| 421.8228 | 61.85  | 15.38 | 13.21 | 16.15 | 15.88 | 0.49 |
| 421.8404 | 56.34  | 17.30 | 17.28 | 18.41 | 18.16 | 0.89 |
| 421.8849 | 26.54  | 14.17 | 15.41 | 14.95 | 16.13 | 0.79 |
| 421.9986 | 42.29  | 15.94 | 16.57 | 17.21 | 16.94 | 0.83 |
| 422.0103 | 18.48  | 11.83 | 16.35 | 15.46 | 14.36 | 1.57 |

|          |        |       |       |       |       |      |
|----------|--------|-------|-------|-------|-------|------|
| 422.0621 | 19.25  | 16.11 | 18.07 | 17.99 | 17.76 | 1.74 |
| 422.0716 | 18.01  | 10.60 | 13.13 | 13.16 | 13.99 | 1.03 |
| 422.2302 | 164.15 | 16.88 | 14.13 | 14.54 | 16.06 | 1.52 |
| 422.2622 | 197.19 | 18.16 | 18.66 | 18.78 | 18.01 | 0.50 |
| 422.7775 | 84.61  | 14.18 | 14.86 | 15.73 | 15.16 | 0.95 |
| 422.7983 | 76.44  | 14.65 | 14.13 | 15.34 | 15.07 | 0.08 |
| 422.8078 | 83.65  | 15.69 | 13.35 | 14.70 | 15.47 | 1.42 |
| 422.8173 | 62.76  | 16.60 | 15.44 | 17.32 | 17.00 | 0.29 |
| 422.8357 | 51.74  | 19.78 | 20.01 | 20.84 | 20.62 | 1.20 |
| 422.8499 | 38.87  | 19.30 | 20.08 | 20.26 | 20.21 | 1.29 |
| 422.8680 | 34.82  | 14.29 | 14.47 | 14.56 | 14.71 | 0.13 |
| 422.8918 | 145.09 | 16.30 | 11.39 | 11.23 | 13.93 | 1.37 |
| 422.8919 | 48.48  | 15.74 | 9.48  | 10.31 | 12.42 | 1.47 |
| 422.9130 | 36.65  | 19.01 | 20.48 | 20.05 | 20.19 | 1.18 |
| 422.9537 | 32.71  | 16.45 | 15.52 | 15.08 | 15.71 | 0.75 |
| 422.9729 | 70.98  | 13.48 | 15.06 | 11.76 | 12.25 | 0.03 |
| 423.2209 | 231.53 | 16.04 | 13.92 | 16.16 | 16.99 | 0.39 |
| 423.2760 | 230.91 | 23.61 | 24.49 | 24.44 | 23.52 | 0.50 |
| 423.7508 | 287.48 | 14.23 | 17.18 | 16.58 | 17.47 | 1.37 |
| 423.8397 | 52.07  | 15.16 | 14.56 | 15.80 | 15.64 | 0.02 |
| 423.9162 | 34.7   | 14.48 | 16.60 | 16.08 | 15.78 | 1.25 |
| 423.9362 | 69.68  | 11.63 | 14.10 | 14.30 | 13.90 | 1.63 |
| 423.9454 | 21.6   | 9.89  | 14.28 | 14.06 | 11.98 | 1.75 |
| 424.2471 | 187.8  | 17.83 | 17.00 | 17.02 | 16.42 | 0.83 |
| 424.2795 | 236.17 | 21.65 | 22.49 | 22.37 | 21.52 | 0.48 |
| 424.3438 | 205.82 | 13.97 | 16.42 | 15.41 | 15.17 | 1.21 |
| 424.7588 | 291.09 | 13.33 | 17.07 | 16.82 | 15.20 | 1.83 |
| 424.7667 | 67.19  | 16.89 | 16.12 | 17.50 | 17.56 | 0.08 |
| 424.7776 | 76.96  | 14.99 | 15.20 | 16.15 | 15.20 | 0.86 |
| 424.7872 | 85.3   | 14.58 | 13.04 | 14.07 | 14.46 | 0.89 |
| 424.8312 | 57.09  | 16.96 | 15.94 | 16.69 | 16.40 | 0.82 |
| 424.8498 | 63.04  | 18.52 | 17.74 | 17.07 | 17.59 | 0.97 |
| 424.8708 | 56.38  | 16.04 | 15.42 | 16.94 | 16.71 | 0.15 |
| 424.9077 | 43.77  | 15.87 | 15.41 | 15.09 | 15.80 | 0.29 |
| 424.9287 | 37.78  | 17.66 | 20.08 | 19.68 | 19.66 | 1.47 |
| 424.9461 | 31.03  | 12.86 | 13.92 | 14.29 | 12.95 | 0.56 |
| 424.9670 | 18.3   | 12.67 | 14.68 | 14.85 | 15.06 | 1.16 |
| 424.9891 | 58.85  | 15.04 | 14.49 | 16.81 | 16.83 | 0.40 |
| 425.0376 | 70.38  | 15.16 | 16.43 | 14.12 | 14.45 | 0.14 |
| 425.0650 | 20.73  | 14.22 | 14.07 | 14.27 | 15.02 | 0.02 |
| 425.0819 | 19.53  | 19.23 | 20.54 | 20.81 | 21.78 | 1.03 |
| 425.1013 | 22.18  | 15.44 | 18.88 | 17.70 | 17.26 | 1.77 |
| 425.1716 | 90.21  | 15.14 | 13.17 | 15.12 | 15.72 | 0.51 |
| 425.2106 | 232.17 | 17.85 | 17.06 | 18.10 | 17.81 | 0.42 |
| 425.2374 | 251.29 | 15.71 | 15.38 | 16.11 | 15.57 | 0.02 |
| 425.2554 | 185.47 | 17.19 | 17.08 | 16.95 | 17.40 | 0.14 |
| 425.2826 | 231.02 | 18.57 | 19.38 | 19.26 | 18.46 | 0.46 |
| 425.2915 | 242.71 | 20.44 | 21.01 | 21.07 | 20.68 | 0.48 |
| 425.9474 | 35.55  | 15.89 | 15.16 | 15.27 | 15.35 | 0.56 |
| 426.0233 | 21.72  | 20.97 | 24.38 | 23.94 | 23.30 | 2.06 |
| 426.0366 | 23.61  | 16.59 | 15.43 | 15.47 | 15.70 | 0.78 |
| 426.2139 | 227.07 | 14.43 | 13.07 | 14.76 | 14.45 | 0.30 |
| 426.2859 | 223.1  | 15.76 | 15.44 | 15.54 | 15.73 | 0.17 |
| 426.2948 | 243.6  | 18.23 | 18.82 | 18.97 | 18.52 | 0.50 |
| 426.3592 | 203.16 | 13.72 | 15.56 | 15.53 | 15.68 | 1.47 |
| 426.7641 | 60.07  | 14.69 | 13.75 | 15.99 | 15.95 | 0.13 |
| 426.7853 | 59.1   | 18.84 | 17.81 | 19.24 | 19.29 | 0.16 |
| 426.8239 | 75.64  | 12.85 | 13.62 | 14.31 | 14.75 | 0.64 |
| 426.8460 | 85.54  | 17.34 | 15.16 | 15.50 | 15.76 | 1.95 |
| 426.8658 | 40.81  | 19.62 | 20.29 | 20.05 | 19.88 | 0.73 |
| 426.8770 | 197.09 | 15.86 | 15.84 | 16.15 | 15.80 | 0.26 |
| 426.9242 | 40.04  | 15.11 | 17.77 | 17.56 | 17.79 | 1.53 |

|          |        |       |       |       |       |      |
|----------|--------|-------|-------|-------|-------|------|
| 426.9823 | 37.85  | 14.84 | 14.86 | 14.86 | 15.05 | 0.02 |
| 427.0338 | 26.1   | 12.17 | 14.06 | 14.24 | 13.43 | 1.20 |
| 427.0522 | 19.2   | 15.89 | 14.64 | 15.14 | 16.14 | 0.47 |
| 427.0772 | 18.77  | 15.05 | 16.16 | 16.05 | 17.33 | 0.64 |
| 427.0883 | 18.88  | 16.29 | 18.17 | 18.09 | 18.47 | 1.09 |
| 427.1896 | 84.06  | 16.33 | 16.10 | 17.75 | 17.86 | 0.45 |
| 427.2038 | 29.14  | 13.08 | 14.68 | 11.05 | 11.73 | 0.11 |
| 427.2265 | 244.57 | 16.60 | 16.14 | 16.78 | 16.04 | 0.21 |
| 427.2338 | 183.23 | 12.76 | 13.82 | 15.12 | 12.20 | 0.51 |
| 427.2525 | 260.6  | 16.24 | 15.47 | 15.86 | 16.48 | 0.26 |
| 427.3068 | 256.66 | 18.07 | 17.98 | 17.88 | 17.93 | 0.14 |
| 427.3222 | 253.25 | 17.65 | 17.84 | 17.80 | 17.14 | 0.10 |
| 427.8690 | 51.02  | 14.86 | 14.57 | 13.93 | 13.81 | 0.36 |
| 427.9056 | 37.29  | 18.03 | 18.28 | 18.69 | 17.64 | 0.20 |
| 427.9268 | 37.29  | 14.05 | 12.67 | 12.36 | 14.82 | 0.62 |
| 427.9569 | 33.75  | 13.02 | 14.03 | 14.64 | 12.89 | 0.75 |
| 428.0276 | 16.73  | 14.85 | 18.61 | 18.22 | 17.49 | 2.00 |
| 428.0470 | 25.87  | 13.33 | 15.33 | 15.50 | 14.26 | 0.96 |
| 428.0896 | 18.17  | 11.56 | 12.87 | 13.07 | 14.39 | 0.64 |
| 428.1935 | 89.65  | 13.12 | 13.14 | 15.19 | 15.13 | 0.56 |
| 428.2653 | 108.69 | 12.73 | 14.68 | 14.56 | 13.73 | 1.05 |
| 428.3024 | 244.8  | 18.13 | 16.86 | 16.45 | 17.31 | 1.65 |
| 428.3256 | 253.53 | 14.95 | 16.56 | 15.71 | 14.03 | 0.51 |
| 428.7850 | 73.04  | 16.85 | 17.06 | 17.12 | 16.94 | 0.35 |
| 428.7950 | 34.4   | 14.45 | 12.84 | 14.62 | 13.64 | 0.38 |
| 428.8613 | 34.94  | 17.22 | 17.81 | 18.22 | 17.30 | 0.81 |
| 428.8742 | 197.08 | 16.79 | 17.24 | 17.47 | 16.71 | 0.93 |
| 428.9188 | 40.46  | 15.49 | 15.02 | 15.26 | 15.44 | 0.37 |
| 428.9413 | 46.48  | 17.70 | 17.67 | 17.77 | 17.87 | 0.03 |
| 428.9587 | 136.59 | 11.61 | 15.62 | 16.00 | 15.15 | 1.55 |
| 429.0237 | 20.57  | 17.12 | 16.72 | 16.70 | 17.84 | 0.15 |
| 429.0459 | 63.95  | 17.91 | 19.44 | 17.44 | 17.50 | 0.65 |
| 429.0592 | 17.77  | 11.73 | 14.39 | 14.45 | 14.14 | 1.13 |
| 429.0851 | 39.66  | 14.74 | 19.05 | 15.01 | 14.76 | 1.00 |
| 429.2052 | 118.09 | 10.33 | 12.93 | 15.21 | 14.62 | 1.09 |
| 429.2862 | 194.51 | 16.54 | 16.13 | 16.36 | 16.49 | 0.32 |
| 429.3018 | 82.48  | 16.54 | 14.15 | 16.57 | 16.91 | 0.68 |
| 429.3225 | 282.3  | 17.43 | 16.53 | 16.91 | 17.08 | 0.53 |
| 429.8067 | 83     | 13.53 | 12.16 | 12.89 | 12.67 | 0.63 |
| 429.8525 | 64.03  | 15.41 | 14.58 | 16.28 | 15.91 | 0.00 |
| 429.9031 | 37.5   | 14.75 | 13.96 | 14.84 | 13.92 | 0.22 |
| 429.9364 | 36.24  | 14.04 | 15.13 | 15.41 | 14.95 | 0.89 |
| 429.9632 | 20.05  | 12.11 | 13.32 | 13.06 | 12.89 | 0.76 |
| 430.0328 | 18.44  | 12.20 | 13.57 | 13.12 | 15.13 | 0.53 |
| 430.0499 | 27.86  | 15.88 | 16.15 | 16.66 | 14.92 | 0.21 |
| 430.0909 | 60.07  | 13.27 | 15.26 | 11.28 | 11.97 | 0.02 |
| 430.2245 | 161.94 | 14.57 | 13.75 | 13.70 | 13.57 | 0.81 |
| 430.2426 | 164.46 | 15.33 | 12.73 | 14.05 | 14.65 | 1.21 |
| 430.2813 | 162.47 | 16.08 | 18.31 | 17.39 | 16.88 | 1.30 |
| 430.2973 | 222.2  | 15.05 | 14.96 | 14.81 | 14.28 | 0.18 |
| 430.3178 | 268.08 | 20.85 | 20.10 | 19.80 | 20.74 | 1.28 |
| 430.7402 | 90.78  | 13.95 | 15.23 | 15.16 | 14.69 | 1.19 |
| 430.7944 | 117.38 | 14.83 | 12.85 | 13.50 | 14.35 | 1.04 |
| 430.8015 | 69.05  | 17.13 | 17.24 | 17.83 | 17.20 | 0.61 |
| 430.8268 | 67.87  | 13.82 | 11.49 | 13.97 | 14.41 | 0.73 |
| 430.8342 | 73     | 14.19 | 14.82 | 14.91 | 15.10 | 0.61 |
| 430.8556 | 38.7   | 13.99 | 14.72 | 15.65 | 13.94 | 0.46 |
| 430.8723 | 194.16 | 16.05 | 15.66 | 16.46 | 15.91 | 0.04 |
| 430.8995 | 47.92  | 20.23 | 21.07 | 21.26 | 21.24 | 1.43 |
| 431.0039 | 64.32  | 14.70 | 23.12 | 13.34 | 13.56 | 0.91 |
| 431.0249 | 62.19  | 13.91 | 16.17 | 11.94 | 12.77 | 0.11 |
| 431.0366 | 18.34  | 15.51 | 15.79 | 15.54 | 16.27 | 0.15 |

|          |        |       |       |       |       |      |
|----------|--------|-------|-------|-------|-------|------|
| 431.0923 | 20.75  | 20.50 | 22.13 | 21.55 | 20.91 | 0.83 |
| 431.1717 | 161.92 | 16.45 | 16.72 | 17.05 | 17.17 | 0.75 |
| 431.1845 | 177.89 | 15.35 | 15.37 | 15.71 | 15.42 | 0.30 |
| 431.2244 | 172.8  | 11.96 | 12.36 | 13.22 | 13.84 | 0.38 |
| 431.2451 | 162.52 | 13.93 | 9.64  | 10.57 | 11.73 | 1.50 |
| 431.2653 | 174.22 | 14.68 | 12.35 | 12.31 | 13.80 | 1.21 |
| 431.2842 | 156.12 | 13.84 | 15.71 | 14.01 | 14.16 | 0.64 |
| 431.3021 | 294.38 | 17.59 | 16.96 | 16.95 | 16.79 | 0.92 |
| 431.3210 | 267.64 | 18.39 | 17.54 | 17.52 | 18.21 | 0.79 |
| 431.9029 | 47.91  | 16.01 | 16.71 | 16.89 | 16.96 | 1.32 |
| 432.0074 | 63.93  | 17.28 | 20.05 | 16.76 | 16.85 | 0.87 |
| 432.0922 | 23.47  | 18.59 | 20.35 | 19.88 | 19.56 | 1.37 |
| 432.1102 | 25.67  | 15.75 | 11.95 | 13.18 | 14.36 | 1.30 |
| 432.1751 | 163.52 | 13.84 | 13.38 | 14.25 | 14.55 | 0.02 |
| 432.1878 | 178.11 | 9.37  | 12.14 | 11.61 | 11.42 | 1.15 |
| 432.2222 | 166.92 | 18.72 | 18.49 | 19.45 | 18.90 | 0.17 |
| 432.2793 | 180.89 | 11.77 | 12.41 | 11.96 | 11.35 | 0.16 |
| 432.2971 | 169.82 | 17.45 | 19.49 | 18.30 | 17.79 | 1.19 |
| 432.3050 | 195.26 | 15.73 | 13.76 | 14.63 | 14.46 | 0.81 |
| 432.3336 | 299.13 | 16.74 | 17.58 | 17.84 | 17.91 | 0.73 |
| 432.7323 | 94.64  | 14.24 | 14.57 | 14.75 | 14.66 | 0.44 |
| 432.7923 | 81.55  | 14.62 | 9.12  | 11.05 | 11.83 | 1.44 |
| 432.8150 | 63.99  | 15.70 | 14.82 | 16.49 | 15.99 | 0.07 |
| 432.8162 | 156.11 | 11.42 | 14.35 | 14.16 | 14.80 | 1.15 |
| 432.8375 | 52.42  | 19.85 | 18.63 | 20.04 | 19.90 | 0.62 |
| 432.8578 | 44.68  | 21.65 | 22.96 | 23.33 | 23.15 | 1.89 |
| 432.8686 | 200.36 | 15.14 | 14.57 | 14.76 | 14.58 | 0.94 |
| 432.8696 | 31.57  | 14.28 | 14.95 | 15.44 | 14.54 | 0.51 |
| 432.8965 | 46.7   | 17.82 | 17.94 | 18.11 | 18.33 | 0.41 |
| 432.9844 | 28.98  | 15.01 | 15.96 | 15.92 | 15.92 | 0.59 |
| 433.0021 | 63.85  | 13.75 | 20.67 | 11.65 | 12.32 | 0.72 |
| 433.0223 | 47.24  | 14.60 | 15.87 | 16.21 | 15.01 | 0.81 |
| 433.0925 | 20.67  | 16.58 | 18.44 | 18.02 | 17.45 | 1.12 |
| 433.1147 | 21.54  | 14.06 | 15.79 | 14.82 | 14.53 | 0.64 |
| 433.2247 | 161.8  | 16.73 | 16.31 | 17.31 | 16.84 | 0.03 |
| 433.2367 | 206.42 | 15.35 | 14.73 | 14.52 | 14.17 | 0.59 |
| 433.3003 | 171.53 | 14.94 | 17.26 | 15.77 | 15.23 | 0.94 |
| 433.3348 | 277.86 | 16.09 | 17.18 | 16.09 | 17.17 | 0.41 |
| 433.8404 | 58.94  | 14.71 | 12.32 | 13.84 | 14.23 | 1.24 |
| 433.8613 | 50.05  | 17.44 | 18.84 | 19.29 | 19.10 | 1.85 |
| 433.8717 | 29.13  | 15.19 | 15.67 | 15.83 | 15.46 | 0.25 |
| 433.9331 | 25.29  | 15.37 | 18.07 | 17.63 | 17.60 | 1.80 |
| 433.9439 | 39.71  | 15.51 | 17.51 | 17.82 | 16.97 | 1.66 |
| 433.9758 | 22.63  | 18.30 | 15.65 | 15.65 | 15.88 | 1.09 |
| 434.0055 | 34.23  | 16.88 | 18.50 | 18.51 | 17.37 | 1.69 |
| 434.0195 | 49.66  | 14.45 | 17.33 | 17.79 | 16.19 | 1.65 |
| 434.2178 | 161.05 | 13.70 | 12.56 | 13.99 | 13.27 | 0.31 |
| 434.2380 | 157.1  | 19.04 | 18.95 | 19.46 | 19.01 | 0.14 |
| 434.2673 | 186.6  | 18.83 | 18.04 | 18.25 | 17.93 | 0.73 |
| 434.2950 | 190.92 | 13.33 | 12.74 | 13.35 | 11.94 | 0.21 |
| 434.3035 | 172.59 | 10.39 | 13.44 | 12.23 | 11.72 | 1.00 |
| 434.3396 | 296.41 | 14.09 | 13.65 | 15.11 | 13.49 | 0.05 |
| 434.7301 | 94.72  | 13.48 | 12.96 | 13.32 | 13.37 | 0.38 |
| 434.7482 | 77.9   | 15.30 | 15.45 | 15.92 | 15.61 | 0.58 |
| 434.7953 | 54.09  | 20.99 | 21.07 | 22.09 | 21.77 | 0.84 |
| 434.8159 | 57.74  | 17.03 | 15.79 | 17.99 | 17.69 | 0.15 |
| 434.8323 | 145.73 | 16.45 | 15.19 | 15.62 | 15.94 | 1.01 |
| 434.8558 | 40.87  | 20.23 | 20.72 | 21.30 | 21.19 | 1.49 |
| 434.9065 | 29.2   | 14.00 | 12.71 | 14.06 | 13.80 | 0.35 |
| 434.9279 | 32.18  | 10.71 | 12.81 | 14.02 | 12.76 | 1.01 |
| 434.9554 | 37.58  | 15.33 | 17.73 | 18.24 | 18.01 | 1.35 |
| 434.9989 | 56.74  | 14.79 | 15.58 | 11.64 | 12.65 | 0.61 |

|          |        |       |       |       |       |      |
|----------|--------|-------|-------|-------|-------|------|
| 435.0551 | 18.39  | 15.34 | 16.56 | 15.65 | 16.12 | 0.49 |
| 435.0818 | 197.36 | 17.84 | 17.08 | 17.39 | 16.97 | 1.38 |
| 435.1200 | 17.58  | 19.06 | 20.58 | 20.57 | 20.36 | 1.01 |
| 435.2404 | 161.63 | 17.29 | 16.82 | 17.34 | 16.97 | 0.30 |
| 435.2521 | 174.35 | 16.70 | 17.61 | 17.88 | 17.57 | 1.09 |
| 435.2734 | 204.2  | 18.74 | 18.82 | 19.15 | 18.29 | 0.13 |
| 435.2886 | 188.86 | 15.02 | 10.62 | 9.73  | 10.57 | 1.95 |
| 435.7987 | 63.61  | 16.39 | 15.58 | 17.60 | 17.21 | 0.18 |
| 435.8585 | 52.15  | 15.31 | 15.65 | 16.28 | 16.24 | 1.03 |
| 435.9536 | 42.87  | 16.54 | 18.03 | 18.25 | 17.86 | 1.18 |
| 436.0308 | 22.95  | 13.30 | 13.02 | 13.99 | 13.22 | 0.06 |
| 436.0823 | 193.42 | 14.55 | 12.04 | 12.74 | 11.26 | 1.21 |
| 436.1237 | 18.1   | 16.14 | 17.51 | 17.48 | 17.50 | 0.92 |
| 436.2513 | 170.59 | 17.27 | 17.12 | 17.61 | 16.97 | 0.03 |
| 436.2840 | 227.69 | 24.34 | 24.59 | 24.31 | 24.17 | 0.15 |
| 436.7458 | 90.06  | 14.46 | 14.05 | 14.54 | 14.14 | 0.28 |
| 436.7745 | 91.7   | 13.72 | 13.53 | 14.08 | 13.85 | 0.07 |
| 436.7934 | 61.91  | 19.37 | 19.41 | 20.46 | 20.16 | 0.77 |
| 436.8109 | 57.16  | 20.45 | 20.57 | 21.63 | 21.35 | 0.89 |
| 436.8235 | 154.05 | 14.21 | 9.29  | 7.93  | 12.27 | 1.48 |
| 436.8513 | 45.51  | 17.30 | 16.02 | 17.69 | 17.64 | 0.55 |
| 436.8658 | 42.21  | 15.40 | 14.83 | 15.02 | 15.17 | 0.30 |
| 436.9755 | 52.74  | 14.87 | 14.33 | 16.19 | 16.36 | 0.31 |
| 437.0099 | 30.24  | 13.09 | 16.35 | 16.81 | 15.30 | 1.65 |
| 437.0352 | 24.35  | 12.44 | 15.52 | 15.17 | 15.12 | 1.23 |
| 437.0743 | 55.17  | 15.65 | 18.41 | 14.79 | 15.10 | 0.70 |
| 437.1158 | 17.02  | 12.28 | 13.95 | 13.82 | 13.88 | 0.56 |
| 437.1922 | 204.78 | 12.00 | 15.15 | 14.73 | 15.32 | 1.33 |
| 437.1923 | 63.71  | 8.64  | 16.81 | 8.36  | 10.03 | 1.01 |
| 437.2431 | 201.05 | 19.46 | 19.28 | 19.56 | 18.64 | 0.09 |
| 437.2678 | 184.19 | 18.25 | 18.89 | 19.28 | 18.88 | 0.78 |
| 437.2903 | 228.85 | 24.03 | 24.22 | 24.17 | 23.54 | 0.09 |
| 437.2911 | 32.91  | 10.25 | 12.71 | 10.16 | 12.97 | 0.42 |
| 437.7967 | 64.95  | 14.20 | 12.13 | 15.31 | 14.83 | 0.32 |
| 437.8143 | 58.06  | 15.95 | 15.13 | 16.97 | 16.63 | 0.09 |
| 437.9600 | 19.77  | 12.66 | 16.59 | 16.54 | 15.98 | 1.71 |
| 437.9723 | 48.82  | 14.59 | 16.61 | 18.01 | 17.27 | 1.25 |
| 437.9932 | 30.96  | 10.66 | 13.15 | 14.13 | 12.20 | 1.59 |
| 438.0768 | 32.34  | 17.12 | 17.77 | 17.96 | 17.30 | 0.87 |
| 438.1351 | 17.31  | 14.04 | 17.74 | 12.17 | 12.78 | 0.44 |
| 438.2462 | 198.96 | 16.68 | 16.35 | 16.69 | 17.16 | 0.07 |
| 438.2669 | 189.18 | 17.59 | 17.39 | 17.76 | 17.37 | 0.07 |
| 438.2947 | 235.67 | 22.06 | 22.03 | 21.98 | 21.33 | 0.13 |
| 438.7723 | 85.42  | 13.27 | 14.13 | 14.94 | 14.69 | 1.00 |
| 438.7822 | 76.53  | 14.51 | 11.99 | 13.45 | 14.04 | 1.16 |
| 438.7915 | 55.12  | 15.79 | 14.58 | 17.20 | 16.80 | 0.06 |
| 438.8132 | 49.19  | 19.57 | 18.95 | 19.98 | 19.84 | 0.17 |
| 438.8232 | 39.09  | 19.51 | 19.58 | 19.87 | 20.10 | 0.39 |
| 438.8426 | 102.22 | 14.15 | 10.82 | 12.91 | 13.66 | 0.87 |
| 438.8657 | 112.43 | 16.56 | 13.55 | 13.93 | 14.67 | 1.74 |
| 438.8869 | 35.97  | 20.16 | 22.05 | 21.71 | 21.69 | 1.61 |
| 438.9443 | 38.99  | 15.42 | 17.22 | 16.76 | 17.23 | 1.04 |
| 439.0540 | 33.57  | 15.14 | 17.65 | 14.80 | 14.59 | 0.63 |
| 439.0698 | 25.37  | 17.23 | 16.86 | 16.97 | 16.97 | 0.39 |
| 439.0871 | 20.81  | 14.97 | 17.53 | 17.35 | 17.18 | 1.58 |
| 439.1679 | 231.45 | 15.57 | 13.25 | 14.68 | 15.05 | 0.79 |
| 439.2258 | 168.41 | 15.14 | 12.54 | 12.15 | 13.26 | 1.63 |
| 439.2451 | 231.82 | 17.26 | 16.47 | 17.15 | 17.81 | 0.34 |
| 439.2691 | 201.12 | 18.16 | 17.98 | 18.14 | 17.92 | 0.10 |
| 439.2985 | 229.59 | 18.89 | 18.80 | 18.74 | 18.01 | 0.15 |
| 439.3072 | 243.05 | 20.74 | 20.73 | 20.79 | 20.34 | 0.03 |
| 439.8122 | 61.84  | 12.53 | 10.56 | 13.22 | 12.76 | 0.24 |



|          |        |       |       |       |       |      |
|----------|--------|-------|-------|-------|-------|------|
| 439.8902 | 39.54  | 15.83 | 17.98 | 17.72 | 17.57 | 1.58 |
| 439.9212 | 22.06  | 13.98 | 14.78 | 14.92 | 15.09 | 0.44 |
| 439.9703 | 60.4   | 12.44 | 12.22 | 13.64 | 14.23 | 0.35 |
| 440.0403 | 27.01  | 13.47 | 14.31 | 12.88 | 13.01 | 0.07 |
| 440.3106 | 243.86 | 18.54 | 18.51 | 18.63 | 18.05 | 0.03 |
| 440.7519 | 76.86  | 11.67 | 12.97 | 14.67 | 13.44 | 1.03 |
| 440.7615 | 76.68  | 10.54 | 10.24 | 13.28 | 13.00 | 0.49 |
| 440.8066 | 55.91  | 16.42 | 15.16 | 16.21 | 16.02 | 0.92 |
| 440.8273 | 44.15  | 17.24 | 17.78 | 16.75 | 17.41 | 0.05 |
| 440.8837 | 43.91  | 17.63 | 17.65 | 17.29 | 17.24 | 0.19 |
| 440.9025 | 41.7   | 19.55 | 21.75 | 21.47 | 21.38 | 1.75 |
| 440.9858 | 74.1   | 13.80 | 15.52 | 11.79 | 12.53 | 0.06 |
| 441.0664 | 24.86  | 15.14 | 14.25 | 14.41 | 14.37 | 0.49 |
| 441.1458 | 87.16  | 13.78 | 13.28 | 15.54 | 15.50 | 0.36 |
| 441.2512 | 164.82 | 17.10 | 16.89 | 16.54 | 17.67 | 0.26 |
| 441.2541 | 290.2  | 10.87 | 17.09 | 16.88 | 13.45 | 1.77 |
| 441.2632 | 261.95 | 20.79 | 22.01 | 22.01 | 22.03 | 1.31 |
| 441.2783 | 254.87 | 17.73 | 17.48 | 17.14 | 17.38 | 0.29 |
| 441.2797 | 172.14 | 14.04 | 13.76 | 13.92 | 12.94 | 0.22 |
| 441.3231 | 256.96 | 18.34 | 17.62 | 17.59 | 17.47 | 0.70 |
| 441.8952 | 32.51  | 13.68 | 14.82 | 15.05 | 13.75 | 0.73 |
| 441.9060 | 41.96  | 14.85 | 17.39 | 17.02 | 16.97 | 1.65 |
| 442.0181 | 19.86  | 17.93 | 21.62 | 21.37 | 21.21 | 2.01 |
| 442.0894 | 77.09  | 13.96 | 13.89 | 15.08 | 15.03 | 0.42 |
| 442.2563 | 162.56 | 14.39 | 13.92 | 13.18 | 15.00 | 0.42 |
| 442.2662 | 286.47 | 17.72 | 18.71 | 18.55 | 19.06 | 1.11 |
| 442.2998 | 189.62 | 14.78 | 13.37 | 13.77 | 13.61 | 0.80 |
| 442.7616 | 73.61  | 18.54 | 19.01 | 19.41 | 18.85 | 0.90 |
| 442.8206 | 69.92  | 18.12 | 16.71 | 17.04 | 16.72 | 1.43 |
| 442.8414 | 42.93  | 20.62 | 20.21 | 20.49 | 20.57 | 0.31 |
| 442.8750 | 39.56  | 13.61 | 13.68 | 13.82 | 12.92 | 0.01 |
| 442.8981 | 35.64  | 17.24 | 19.51 | 19.49 | 19.55 | 1.86 |
| 442.9568 | 45.59  | 15.92 | 14.60 | 14.97 | 15.21 | 0.54 |
| 443.0528 | 22.49  | 11.86 | 14.96 | 15.63 | 13.92 | 1.74 |
| 443.2603 | 276.11 | 18.97 | 20.16 | 20.13 | 20.45 | 1.33 |
| 443.3020 | 212.96 | 16.08 | 16.34 | 16.07 | 16.03 | 0.08 |
| 443.3382 | 283.52 | 18.28 | 16.77 | 16.78 | 17.08 | 0.98 |
| 443.8431 | 62.8   | 15.75 | 14.84 | 14.65 | 14.77 | 0.88 |
| 443.8797 | 33.41  | 16.73 | 16.09 | 16.79 | 15.51 | 0.20 |
| 443.9003 | 37.48  | 13.05 | 12.96 | 11.96 | 14.45 | 0.19 |
| 443.9797 | 31.08  | 11.91 | 12.95 | 14.95 | 11.68 | 0.70 |
| 444.0234 | 19.79  | 17.28 | 19.74 | 18.80 | 18.48 | 1.38 |
| 444.0341 | 19.47  | 17.41 | 21.38 | 20.46 | 19.75 | 1.66 |
| 444.2634 | 290.08 | 16.65 | 16.92 | 16.80 | 17.18 | 0.23 |
| 444.2970 | 190.7  | 15.65 | 15.50 | 15.19 | 15.89 | 0.38 |
| 444.3159 | 192.35 | 16.83 | 16.68 | 16.75 | 16.22 | 0.24 |
| 444.3336 | 190.17 | 16.01 | 20.58 | 20.55 | 19.17 | 1.85 |
| 444.7597 | 74.95  | 16.36 | 17.50 | 17.75 | 17.08 | 1.51 |
| 444.7774 | 72.73  | 18.80 | 19.64 | 19.98 | 19.22 | 1.32 |
| 444.8175 | 85.46  | 13.58 | 12.67 | 12.94 | 12.67 | 0.41 |
| 444.8352 | 39.79  | 18.10 | 18.01 | 18.74 | 18.13 | 0.32 |
| 444.8922 | 36.93  | 15.94 | 17.22 | 17.14 | 16.97 | 1.51 |
| 444.9154 | 48.59  | 18.29 | 17.89 | 18.17 | 18.18 | 0.23 |
| 444.9346 | 49.16  | 16.89 | 18.56 | 18.86 | 18.39 | 1.72 |
| 444.9663 | 25.41  | 12.15 | 16.21 | 15.71 | 15.22 | 1.66 |
| 444.9735 | 23.19  | 16.79 | 19.98 | 19.89 | 19.49 | 1.73 |
| 445.0083 | 18.28  | 16.37 | 19.84 | 19.66 | 18.72 | 1.54 |
| 445.0374 | 19.01  | 13.69 | 17.58 | 15.61 | 15.22 | 1.16 |
| 445.0562 | 31.38  | 18.96 | 22.35 | 20.60 | 20.30 | 1.87 |
| 445.0825 | 30.81  | 7.43  | 15.56 | 7.10  | 7.47  | 1.11 |
| 445.1874 | 168.05 | 13.90 | 13.65 | 14.02 | 13.54 | 0.12 |
| 445.2598 | 223.94 | 12.78 | 14.78 | 15.36 | 15.14 | 1.12 |

|          |        |       |       |       |       |      |
|----------|--------|-------|-------|-------|-------|------|
| 445.2812 | 156.93 | 14.39 | 13.61 | 13.33 | 14.15 | 0.54 |
| 445.3177 | 265.9  | 17.59 | 16.99 | 16.67 | 16.70 | 0.92 |
| 445.3357 | 199.59 | 13.97 | 18.60 | 18.59 | 17.56 | 2.33 |
| 445.7807 | 79.88  | 11.45 | 12.78 | 13.03 | 12.61 | 0.88 |
| 445.9105 | 37.38  | 14.29 | 14.06 | 15.11 | 14.08 | 0.08 |
| 446.0111 | 17.34  | 12.25 | 16.04 | 15.89 | 14.88 | 1.56 |
| 446.0651 | 53.22  | 13.82 | 18.74 | 11.88 | 12.54 | 0.60 |
| 446.1998 | 163.66 | 10.58 | 11.33 | 11.91 | 10.44 | 0.48 |
| 446.3128 | 206.11 | 15.56 | 15.90 | 15.52 | 16.24 | 0.24 |
| 446.3210 | 219.89 | 15.19 | 15.51 | 14.79 | 15.06 | 0.00 |
| 446.3315 | 204.76 | 16.65 | 16.40 | 16.31 | 16.00 | 0.38 |
| 446.3388 | 194.84 | 12.50 | 14.47 | 13.90 | 13.01 | 1.13 |
| 446.7680 | 82.7   | 15.39 | 12.44 | 13.77 | 14.50 | 1.33 |
| 446.7759 | 67.91  | 16.15 | 17.11 | 17.76 | 16.91 | 1.37 |
| 446.8078 | 86.33  | 14.46 | 14.97 | 15.37 | 15.51 | 0.68 |
| 446.8294 | 39.29  | 15.80 | 15.52 | 16.32 | 15.14 | 0.02 |
| 446.8529 | 148.98 | 16.79 | 14.35 | 14.11 | 15.40 | 1.71 |
| 446.8736 | 51.76  | 20.31 | 20.62 | 21.12 | 21.08 | 1.10 |
| 446.9119 | 46.08  | 15.11 | 12.09 | 13.41 | 13.20 | 0.67 |
| 446.9718 | 43.36  | 15.30 | 15.68 | 15.62 | 16.27 | 0.41 |
| 446.9991 | 66.65  | 15.01 | 18.92 | 13.72 | 14.11 | 0.68 |
| 447.0207 | 33.58  | 13.40 | 16.44 | 14.86 | 14.61 | 1.36 |
| 447.0607 | 29.08  | 16.00 | 18.70 | 18.26 | 17.97 | 1.91 |
| 447.1352 | 30.75  | 14.97 | 15.91 | 15.11 | 15.86 | 0.63 |
| 447.1666 | 160.86 | 13.80 | 13.67 | 13.72 | 13.76 | 0.10 |
| 447.1774 | 71.82  | 14.65 | 11.39 | 14.62 | 15.84 | 0.56 |
| 447.2745 | 228.53 | 22.97 | 23.22 | 23.47 | 23.07 | 0.23 |
| 447.8769 | 51.14  | 15.97 | 15.93 | 16.52 | 16.49 | 0.44 |
| 448.0048 | 96.71  | 14.54 | 16.85 | 16.66 | 16.17 | 1.22 |
| 448.0189 | 26.42  | 14.62 | 16.22 | 15.98 | 15.53 | 1.23 |
| 448.0446 | 17.83  | 16.52 | 19.69 | 19.18 | 18.32 | 1.48 |
| 448.0669 | 26.52  | 14.19 | 14.50 | 14.99 | 15.73 | 0.34 |
| 448.0938 | 20.91  | 13.53 | 15.74 | 15.90 | 14.30 | 1.44 |
| 448.2409 | 185.71 | 17.05 | 16.08 | 16.22 | 14.66 | 0.65 |
| 448.2794 | 232.92 | 21.28 | 21.27 | 21.53 | 21.31 | 0.09 |
| 448.7437 | 189.56 | 16.21 | 14.43 | 14.76 | 14.65 | 1.41 |
| 448.7665 | 84.27  | 15.52 | 13.15 | 14.80 | 14.93 | 1.30 |
| 448.7864 | 71.02  | 16.40 | 14.37 | 16.45 | 16.49 | 0.83 |
| 448.8113 | 54.5   | 18.35 | 17.87 | 19.14 | 18.91 | 0.19 |
| 448.8319 | 54.25  | 21.21 | 21.91 | 22.64 | 22.43 | 1.54 |
| 448.8476 | 48.94  | 16.63 | 15.41 | 17.70 | 16.98 | 0.12 |
| 448.8707 | 45.2   | 18.08 | 18.15 | 18.58 | 18.62 | 0.56 |
| 448.9230 | 26.65  | 17.00 | 17.24 | 16.92 | 17.38 | 0.18 |
| 448.9603 | 37.16  | 15.16 | 13.90 | 14.70 | 14.58 | 0.65 |
| 448.9958 | 48.83  | 14.76 | 16.87 | 16.87 | 16.22 | 1.32 |
| 449.0478 | 20.61  | 11.92 | 14.59 | 13.29 | 13.16 | 0.90 |
| 449.0983 | 27.73  | 16.24 | 16.30 | 16.46 | 15.52 | 0.03 |
| 449.1096 | 20.92  | 13.18 | 15.98 | 15.60 | 15.34 | 1.38 |
| 449.1953 | 24.23  | 13.92 | 13.39 | 14.41 | 15.83 | 0.07 |
| 449.2491 | 192.19 | 15.05 | 13.17 | 14.08 | 13.34 | 0.70 |
| 449.2763 | 203.15 | 18.64 | 18.25 | 18.84 | 18.61 | 0.12 |
| 449.2769 | 275.99 | 15.13 | 10.92 | 13.13 | 15.72 | 0.82 |
| 449.2917 | 234.81 | 21.05 | 21.67 | 21.49 | 20.73 | 0.33 |
| 449.3226 | 268.08 | 16.80 | 17.95 | 17.72 | 17.42 | 0.78 |
| 449.7515 | 194.52 | 14.46 | 14.63 | 14.12 | 13.18 | 0.12 |
| 449.8354 | 47.17  | 16.96 | 17.51 | 18.47 | 18.18 | 1.35 |
| 449.9080 | 33.54  | 16.39 | 17.36 | 17.14 | 16.79 | 1.29 |
| 449.9181 | 35.56  | 15.21 | 18.00 | 18.14 | 17.37 | 1.98 |
| 449.9936 | 52.07  | 14.95 | 17.72 | 18.40 | 17.24 | 1.76 |
| 450.0105 | 26.2   | 9.93  | 13.02 | 14.60 | 11.55 | 1.44 |
| 450.1405 | 25.78  | 14.78 | 15.57 | 16.24 | 15.60 | 0.85 |
| 450.2633 | 189.18 | 21.82 | 21.46 | 21.44 | 20.82 | 0.63 |

|          |        |       |       |       |       |      |
|----------|--------|-------|-------|-------|-------|------|
| 450.2867 | 213.86 | 15.95 | 15.05 | 15.47 | 16.31 | 0.46 |
| 450.2962 | 241.02 | 19.05 | 19.56 | 19.34 | 18.58 | 0.22 |
| 450.7828 | 42.79  | 13.60 | 7.54  | 11.28 | 12.39 | 1.34 |
| 450.7905 | 60.43  | 16.36 | 15.55 | 17.65 | 17.18 | 0.21 |
| 450.8073 | 81.16  | 17.43 | 15.42 | 16.80 | 16.73 | 1.24 |
| 450.8307 | 45.03  | 19.60 | 19.98 | 20.81 | 20.63 | 1.25 |
| 450.8993 | 19.44  | 12.20 | 14.32 | 15.14 | 14.56 | 1.55 |
| 450.9197 | 28.3   | 15.22 | 14.66 | 14.32 | 15.15 | 0.51 |
| 450.9338 | 67.91  | 10.38 | 11.24 | 15.02 | 15.10 | 0.99 |
| 450.9434 | 24.29  | 15.33 | 17.35 | 17.65 | 17.21 | 1.29 |
| 451.0065 | 62.61  | 10.84 | 15.91 | 9.15  | 9.51  | 0.62 |
| 451.0503 | 17.88  | 13.55 | 13.85 | 14.06 | 15.43 | 0.27 |
| 451.1176 | 19.52  | 11.73 | 13.95 | 13.27 | 13.05 | 0.91 |
| 451.1275 | 20.91  | 16.58 | 18.55 | 18.49 | 17.93 | 1.34 |
| 451.2652 | 192.64 | 19.53 | 19.18 | 19.21 | 18.53 | 0.53 |
| 451.2923 | 251.53 | 24.32 | 23.03 | 22.86 | 22.92 | 1.56 |
| 451.3070 | 254.37 | 21.12 | 21.49 | 21.35 | 20.80 | 0.17 |
| 451.8331 | 56.05  | 14.68 | 14.64 | 15.80 | 15.61 | 0.64 |
| 451.9279 | 54.28  | 17.33 | 18.40 | 18.71 | 18.06 | 1.37 |
| 452.0507 | 20.34  | 16.02 | 18.47 | 18.48 | 18.07 | 1.67 |
| 452.1392 | 23.05  | 18.10 | 20.04 | 18.85 | 18.56 | 1.06 |
| 452.2674 | 193.73 | 15.47 | 14.09 | 14.23 | 13.79 | 0.83 |
| 452.2790 | 207.49 | 25.09 | 25.60 | 25.60 | 25.14 | 0.77 |
| 452.2953 | 236.6  | 22.17 | 21.57 | 21.60 | 21.27 | 0.84 |
| 452.3102 | 254.48 | 19.18 | 19.44 | 19.24 | 18.89 | 0.09 |
| 452.7880 | 52.41  | 13.42 | 12.10 | 15.10 | 14.30 | 0.05 |
| 452.8052 | 86.52  | 14.31 | 12.65 | 13.82 | 13.84 | 0.66 |
| 452.8262 | 55.15  | 16.64 | 15.94 | 17.19 | 17.01 | 0.13 |
| 452.8398 | 49.88  | 15.48 | 12.02 | 13.52 | 14.26 | 1.18 |
| 452.8780 | 37.79  | 14.87 | 16.10 | 15.43 | 14.42 | 0.44 |
| 452.9028 | 36.73  | 17.64 | 18.95 | 18.61 | 18.79 | 1.16 |
| 452.9236 | 41.85  | 17.76 | 20.57 | 20.42 | 20.43 | 1.54 |
| 452.9498 | 57.86  | 13.19 | 12.49 | 15.01 | 15.31 | 0.34 |
| 452.9840 | 35.06  | 11.09 | 13.87 | 14.98 | 13.04 | 1.06 |
| 453.0069 | 68.02  | 16.95 | 18.70 | 16.35 | 16.47 | 0.61 |
| 453.0748 | 23.71  | 17.76 | 18.07 | 17.73 | 17.47 | 0.09 |
| 453.1425 | 23.09  | 14.41 | 16.07 | 14.00 | 14.34 | 0.34 |
| 453.1666 | 203.42 | 12.12 | 12.68 | 14.48 | 14.51 | 0.81 |
| 453.2852 | 222.88 | 22.98 | 23.44 | 23.35 | 22.94 | 0.57 |
| 453.2974 | 263.6  | 17.25 | 17.24 | 17.51 | 17.48 | 0.12 |
| 453.9167 | 31.68  | 12.92 | 13.16 | 14.03 | 13.27 | 0.34 |
| 453.9273 | 45.2   | 13.35 | 15.89 | 15.33 | 16.08 | 1.26 |
| 453.9466 | 62.47  | 13.84 | 14.54 | 16.84 | 16.33 | 1.01 |
| 454.0094 | 33.35  | 14.15 | 18.29 | 18.43 | 17.03 | 2.09 |
| 454.0500 | 32.9   | 16.27 | 16.53 | 17.04 | 16.24 | 0.27 |
| 454.0748 | 22.33  | 14.64 | 17.44 | 17.25 | 16.68 | 1.82 |
| 454.2365 | 185.54 | 11.98 | 10.32 | 10.85 | 14.15 | 0.58 |
| 454.2914 | 288.58 | 16.16 | 16.66 | 16.79 | 16.81 | 0.59 |
| 454.3182 | 252.66 | 16.90 | 16.08 | 16.22 | 16.07 | 0.58 |
| 454.7778 | 53.53  | 14.90 | 11.29 | 14.07 | 14.27 | 1.36 |
| 454.7888 | 50.55  | 13.81 | 13.79 | 14.98 | 15.21 | 0.33 |
| 454.7979 | 44.15  | 19.14 | 18.37 | 19.48 | 19.69 | 0.24 |
| 454.8176 | 91.8   | 14.32 | 12.77 | 15.05 | 14.25 | 0.33 |
| 454.8399 | 75.07  | 18.04 | 16.12 | 17.13 | 16.86 | 1.52 |
| 454.8609 | 38.3   | 21.44 | 22.86 | 22.64 | 22.58 | 1.62 |
| 454.9008 | 43.53  | 14.89 | 10.90 | 11.28 | 11.86 | 1.53 |
| 454.9183 | 42.04  | 17.63 | 19.12 | 18.94 | 19.06 | 1.47 |
| 454.9775 | 19.4   | 13.86 | 14.67 | 14.64 | 15.67 | 0.42 |
| 455.0035 | 44.65  | 12.11 | 13.96 | 12.57 | 11.34 | 0.60 |
| 455.0228 | 60.61  | 12.34 | 20.16 | 9.88  | 11.41 | 0.71 |
| 455.0731 | 25.56  | 12.57 | 13.12 | 13.08 | 12.25 | 0.30 |
| 455.2034 | 96.07  | 15.29 | 10.76 | 13.52 | 14.65 | 1.21 |

|          |        |       |       |       |       |      |
|----------|--------|-------|-------|-------|-------|------|
| 455.2420 | 104.79 | 16.15 | 13.44 | 14.50 | 14.19 | 1.08 |
| 455.2683 | 170.19 | 15.19 | 13.53 | 13.11 | 14.72 | 0.90 |
| 455.2843 | 291.8  | 13.19 | 12.99 | 14.53 | 15.13 | 0.30 |
| 455.2871 | 211.47 | 16.69 | 17.00 | 16.94 | 16.54 | 0.29 |
| 455.3177 | 85.64  | 14.18 | 11.77 | 11.50 | 11.84 | 0.68 |
| 455.8643 | 44.72  | 17.23 | 18.80 | 18.65 | 18.51 | 1.91 |
| 455.9158 | 33.54  | 12.86 | 15.55 | 15.43 | 15.00 | 1.70 |
| 456.0259 | 64.51  | 11.38 | 16.53 | 9.42  | 9.86  | 0.58 |
| 456.2412 | 172.69 | 14.93 | 13.73 | 13.87 | 13.75 | 0.78 |
| 456.2972 | 167.17 | 15.57 | 17.15 | 16.83 | 16.37 | 1.29 |
| 456.3338 | 272.28 | 18.63 | 17.83 | 17.88 | 17.83 | 0.88 |
| 456.7769 | 89.43  | 14.96 | 15.04 | 15.05 | 14.99 | 0.10 |
| 456.7978 | 50.46  | 20.28 | 19.41 | 20.09 | 19.99 | 0.56 |
| 456.8187 | 85.04  | 14.70 | 12.93 | 13.91 | 13.47 | 1.16 |
| 456.8371 | 79.87  | 14.74 | 11.58 | 12.39 | 12.74 | 1.51 |
| 456.8574 | 51.82  | 18.89 | 19.82 | 19.64 | 19.64 | 1.30 |
| 456.8765 | 44.54  | 20.78 | 22.51 | 22.35 | 22.23 | 1.99 |
| 456.9135 | 41.51  | 15.39 | 16.30 | 16.63 | 16.79 | 0.96 |
| 457.0208 | 65.26  | 11.53 | 16.49 | 9.82  | 10.49 | 0.66 |
| 457.2367 | 135.92 | 15.49 | 13.44 | 14.30 | 13.01 | 0.73 |
| 457.2814 | 166.62 | 13.84 | 10.36 | 10.80 | 12.05 | 1.33 |
| 457.2997 | 174.35 | 11.92 | 14.56 | 13.74 | 13.09 | 1.02 |
| 457.3179 | 245.21 | 16.93 | 16.89 | 17.31 | 17.30 | 0.17 |
| 457.3334 | 159.01 | 14.88 | 10.33 | 11.33 | 10.69 | 1.21 |
| 457.8016 | 74.2   | 15.24 | 13.42 | 15.18 | 14.85 | 0.88 |
| 457.8619 | 50.61  | 10.75 | 14.06 | 13.20 | 12.86 | 1.09 |
| 457.8801 | 45.1   | 16.14 | 18.36 | 18.20 | 18.08 | 1.87 |
| 458.2562 | 178.65 | 13.83 | 12.49 | 12.76 | 12.80 | 0.83 |
| 458.2684 | 196.12 | 15.04 | 13.87 | 14.68 | 14.54 | 0.85 |
| 458.3130 | 186.55 | 18.06 | 19.86 | 18.96 | 18.38 | 1.14 |
| 458.3493 | 201.21 | 13.13 | 16.93 | 16.98 | 15.53 | 1.42 |
| 458.3494 | 297.03 | 12.90 | 13.36 | 14.25 | 14.24 | 0.44 |
| 458.7357 | 84.91  | 16.25 | 17.69 | 17.77 | 17.33 | 1.52 |
| 458.7566 | 93.89  | 13.19 | 13.11 | 13.61 | 13.05 | 0.11 |
| 458.7962 | 67.79  | 18.61 | 17.67 | 18.85 | 18.48 | 0.63 |
| 458.8140 | 63.11  | 20.97 | 20.91 | 21.57 | 21.31 | 0.54 |
| 458.8514 | 52.96  | 14.89 | 10.47 | 13.79 | 13.40 | 0.95 |
| 458.8728 | 38.47  | 18.60 | 20.41 | 20.41 | 20.36 | 2.00 |
| 458.8896 | 32.26  | 15.79 | 17.04 | 17.19 | 16.87 | 1.05 |
| 458.9364 | 22.11  | 16.91 | 17.75 | 18.09 | 17.57 | 0.83 |
| 458.9497 | 20.85  | 15.54 | 17.70 | 17.78 | 17.74 | 1.82 |
| 459.0562 | 58.15  | 12.90 | 16.64 | 11.17 | 11.48 | 0.46 |
| 459.0772 | 53.4   | 14.69 | 17.83 | 13.31 | 13.75 | 0.53 |
| 459.2033 | 183.67 | 14.50 | 13.67 | 13.55 | 13.24 | 0.56 |
| 459.2616 | 176.75 | 14.44 | 11.34 | 11.69 | 12.44 | 1.41 |
| 459.2959 | 192.25 | 15.75 | 15.01 | 14.81 | 14.38 | 0.46 |
| 459.3160 | 185.64 | 15.95 | 17.77 | 16.78 | 16.11 | 1.01 |
| 459.8175 | 54.61  | 16.13 | 13.87 | 16.49 | 16.10 | 0.80 |
| 459.8790 | 38.32  | 13.24 | 14.79 | 14.89 | 15.17 | 1.51 |
| 459.9542 | 30.41  | 13.04 | 14.76 | 15.79 | 12.46 | 0.94 |
| 460.0194 | 18.23  | 15.25 | 17.90 | 17.34 | 16.21 | 1.21 |
| 460.0291 | 18.48  | 13.55 | 18.20 | 17.71 | 16.59 | 1.67 |
| 460.2841 | 204.31 | 19.96 | 20.42 | 20.58 | 20.25 | 0.71 |
| 460.3287 | 211.73 | 18.99 | 20.80 | 19.45 | 18.99 | 0.89 |
| 460.7339 | 75.24  | 14.34 | 15.43 | 15.67 | 14.84 | 1.01 |
| 460.7515 | 66.59  | 16.46 | 17.22 | 17.85 | 17.44 | 1.03 |
| 460.7934 | 78.41  | 14.12 | 12.51 | 13.44 | 13.10 | 0.76 |
| 460.8090 | 43.51  | 18.85 | 18.10 | 19.42 | 19.32 | 0.11 |
| 460.8662 | 38.58  | 16.49 | 17.67 | 17.61 | 17.37 | 1.36 |
| 460.8685 | 153.36 | 14.96 | 10.75 | 9.14  | 12.69 | 1.60 |
| 460.8896 | 46.16  | 18.50 | 17.87 | 18.01 | 18.35 | 0.51 |
| 460.9098 | 47.21  | 17.27 | 18.11 | 18.47 | 18.34 | 1.15 |

|          |        |       |       |       |       |      |
|----------|--------|-------|-------|-------|-------|------|
| 460.9403 | 31.33  | 12.56 | 14.07 | 14.26 | 13.53 | 1.05 |
| 460.9817 | 22     | 12.90 | 13.31 | 13.85 | 14.32 | 0.36 |
| 461.0286 | 47.5   | 14.09 | 10.98 | 15.12 | 14.18 | 0.49 |
| 461.0358 | 58.76  | 10.20 | 22.97 | 10.73 | 10.18 | 1.18 |
| 461.2497 | 281.17 | 15.48 | 18.68 | 18.20 | 18.35 | 1.16 |
| 461.2709 | 178.73 | 16.05 | 17.64 | 18.01 | 17.78 | 1.16 |
| 461.2903 | 226.23 | 22.81 | 22.50 | 22.73 | 22.40 | 0.20 |
| 461.3300 | 213.38 | 17.08 | 18.80 | 17.63 | 17.40 | 0.86 |
| 461.7515 | 285.59 | 14.19 | 17.31 | 16.44 | 16.78 | 1.03 |
| 461.7515 | 194.81 | 18.26 | 17.76 | 18.09 | 17.12 | 0.46 |
| 461.8839 | 37.6   | 13.59 | 13.52 | 13.65 | 13.50 | 0.01 |
| 461.9033 | 23.23  | 13.14 | 13.83 | 13.45 | 14.70 | 0.26 |
| 462.0392 | 53.42  | 15.58 | 20.03 | 14.69 | 14.94 | 0.87 |
| 462.2559 | 197    | 16.94 | 15.95 | 16.48 | 14.82 | 0.56 |
| 462.2991 | 238.84 | 22.91 | 22.30 | 22.05 | 22.17 | 0.96 |
| 462.7452 | 71.18  | 15.32 | 14.08 | 15.22 | 15.52 | 0.63 |
| 462.7591 | 197.52 | 16.40 | 15.43 | 15.60 | 14.39 | 0.59 |
| 462.7820 | 86.05  | 12.15 | 12.84 | 14.01 | 13.54 | 0.78 |
| 462.8062 | 49.08  | 16.14 | 15.00 | 16.04 | 14.51 | 0.65 |
| 462.8266 | 147.71 | 16.78 | 14.60 | 15.28 | 15.94 | 1.52 |
| 462.8478 | 54.6   | 19.83 | 19.54 | 20.46 | 20.37 | 0.32 |
| 462.8848 | 146.73 | 14.92 | 7.82  | 8.38  | 11.89 | 1.67 |
| 462.8862 | 54.55  | 15.79 | 12.98 | 13.75 | 14.71 | 1.07 |
| 462.9456 | 56.38  | 15.00 | 14.46 | 14.93 | 15.23 | 0.19 |
| 462.9660 | 74.11  | 12.67 | 13.61 | 14.24 | 14.78 | 0.80 |
| 463.0343 | 59.01  | 13.28 | 19.86 | 11.00 | 12.30 | 0.66 |
| 463.0621 | 22.67  | 14.81 | 11.28 | 11.41 | 12.23 | 1.57 |
| 463.1513 | 71.07  | 15.06 | 12.57 | 15.70 | 16.50 | 0.38 |
| 463.1618 | 127.93 | 12.00 | 11.27 | 12.78 | 12.43 | 0.00 |
| 463.2082 | 223.12 | 12.89 | 12.77 | 14.28 | 15.36 | 0.40 |
| 463.2257 | 175.26 | 15.47 | 12.19 | 13.40 | 14.19 | 1.43 |
| 463.2873 | 192.09 | 20.19 | 20.42 | 20.61 | 20.62 | 0.42 |
| 463.3057 | 232.88 | 21.99 | 21.44 | 21.25 | 20.97 | 0.81 |
| 463.8508 | 55.73  | 15.41 | 14.10 | 15.51 | 15.40 | 0.67 |
| 463.9451 | 32.12  | 15.53 | 17.08 | 17.17 | 16.41 | 1.08 |
| 463.9684 | 37.33  | 12.48 | 12.07 | 10.64 | 15.03 | 0.32 |
| 463.9786 | 95.45  | 14.53 | 17.35 | 17.44 | 16.95 | 1.49 |
| 464.0015 | 17.99  | 14.85 | 19.74 | 19.73 | 19.15 | 2.06 |
| 464.0282 | 20.39  | 13.20 | 11.93 | 12.38 | 14.76 | 0.27 |
| 464.0372 | 62.44  | 12.99 | 16.07 | 10.94 | 11.73 | 0.30 |
| 464.2776 | 187.45 | 16.76 | 17.85 | 18.25 | 17.28 | 0.97 |
| 464.2901 | 195.37 | 18.41 | 18.48 | 18.83 | 18.71 | 0.29 |
| 464.3129 | 242.17 | 20.77 | 19.05 | 18.84 | 18.22 | 1.29 |
| 464.7404 | 81.78  | 14.87 | 13.72 | 14.99 | 15.16 | 0.40 |
| 464.7613 | 72.24  | 16.35 | 15.59 | 16.34 | 16.40 | 0.59 |
| 464.8060 | 53.47  | 19.82 | 20.10 | 21.09 | 20.89 | 0.98 |
| 464.8232 | 49.27  | 17.35 | 16.15 | 17.99 | 17.48 | 0.41 |
| 464.8343 | 32.25  | 13.59 | 14.66 | 15.75 | 13.78 | 0.95 |
| 464.8427 | 137.61 | 15.88 | 14.73 | 14.65 | 15.13 | 1.10 |
| 464.8981 | 29.75  | 16.69 | 15.02 | 14.52 | 15.98 | 0.91 |
| 464.9266 | 27.75  | 12.60 | 13.68 | 13.96 | 14.22 | 0.90 |
| 464.9701 | 55.01  | 13.31 | 15.36 | 16.67 | 16.20 | 1.32 |
| 465.0065 | 21.6   | 11.98 | 14.83 | 14.44 | 14.21 | 1.60 |
| 465.0313 | 23.42  | 14.84 | 17.27 | 17.13 | 16.34 | 1.28 |
| 465.2853 | 187.15 | 15.87 | 15.72 | 15.59 | 15.70 | 0.12 |
| 465.3063 | 222.69 | 24.91 | 24.97 | 25.10 | 25.41 | 0.21 |
| 465.3223 | 250.41 | 21.49 | 21.04 | 20.88 | 20.40 | 0.47 |
| 465.8091 | 56.7   | 15.53 | 14.89 | 16.67 | 16.34 | 0.22 |
| 465.8822 | 36.54  | 15.95 | 16.50 | 16.37 | 15.57 | 0.41 |
| 465.8921 | 38.24  | 15.58 | 18.04 | 18.28 | 17.41 | 1.78 |
| 465.9404 | 34.97  | 12.95 | 13.04 | 12.84 | 13.14 | 0.01 |
| 465.9675 | 55.89  | 14.85 | 17.16 | 18.21 | 17.25 | 1.65 |

|          |        |       |       |       |       |      |
|----------|--------|-------|-------|-------|-------|------|
| 466.1249 | 23.36  | 17.73 | 19.07 | 18.79 | 18.57 | 1.13 |
| 466.2939 | 218.89 | 18.46 | 18.06 | 17.36 | 17.81 | 0.77 |
| 466.3094 | 224.29 | 23.09 | 23.44 | 23.48 | 23.64 | 0.52 |
| 466.3264 | 255.11 | 19.28 | 19.11 | 18.89 | 18.24 | 0.23 |
| 466.7573 | 72.05  | 14.74 | 12.78 | 15.21 | 15.15 | 0.60 |
| 466.7800 | 77.22  | 17.78 | 16.69 | 17.14 | 16.81 | 1.19 |
| 466.8039 | 55.81  | 18.20 | 18.35 | 19.51 | 19.26 | 0.86 |
| 466.8241 | 57.23  | 14.59 | 12.42 | 14.09 | 14.19 | 0.86 |
| 466.8359 | 40.45  | 12.91 | 12.72 | 13.92 | 12.27 | 0.07 |
| 466.8745 | 33.72  | 11.86 | 15.20 | 15.50 | 14.73 | 1.78 |
| 466.9168 | 32.63  | 16.29 | 18.17 | 18.30 | 18.01 | 1.70 |
| 466.9392 | 41.81  | 16.99 | 18.86 | 18.77 | 18.91 | 1.35 |
| 466.9635 | 18.74  | 15.66 | 16.68 | 17.08 | 16.90 | 0.97 |
| 466.9807 | 65.3   | 13.16 | 15.63 | 11.08 | 11.83 | 0.14 |
| 467.0000 | 21.33  | 11.95 | 16.36 | 15.69 | 15.62 | 1.41 |
| 467.0409 | 17.73  | 14.67 | 19.63 | 17.34 | 17.00 | 1.73 |
| 467.1281 | 22.67  | 12.77 | 14.49 | 13.58 | 13.36 | 0.54 |
| 467.2059 | 22.74  | 13.94 | 13.52 | 14.48 | 16.04 | 0.11 |
| 467.3068 | 227.66 | 21.35 | 21.59 | 21.63 | 21.86 | 0.36 |
| 467.3092 | 290.38 | 19.32 | 19.34 | 19.48 | 19.53 | 0.08 |
| 467.3205 | 210.47 | 15.40 | 15.31 | 15.49 | 16.48 | 0.07 |
| 467.8071 | 58.1   | 12.94 | 10.18 | 13.71 | 13.52 | 0.50 |
| 467.8983 | 36.8   | 17.22 | 17.76 | 18.05 | 17.05 | 0.47 |
| 467.9664 | 53.94  | 11.23 | 12.93 | 13.92 | 13.71 | 1.03 |
| 468.0472 | 57.47  | 11.93 | 15.46 | 9.78  | 11.17 | 0.35 |
| 468.1432 | 22.96  | 12.29 | 15.35 | 13.54 | 12.55 | 1.05 |
| 468.2728 | 187.02 | 14.45 | 14.43 | 14.85 | 13.80 | 0.08 |
| 468.2826 | 273.86 | 19.04 | 20.01 | 20.23 | 19.91 | 1.20 |
| 468.3070 | 287.57 | 17.43 | 17.84 | 18.18 | 17.90 | 0.85 |
| 468.3239 | 210.78 | 14.86 | 13.42 | 13.25 | 14.88 | 0.72 |
| 468.7761 | 77.46  | 14.30 | 11.33 | 11.51 | 11.32 | 1.18 |
| 468.8017 | 57.93  | 15.22 | 13.48 | 16.18 | 15.76 | 0.28 |
| 468.8527 | 42.56  | 15.07 | 14.92 | 15.66 | 14.36 | 0.04 |
| 468.8767 | 44.89  | 19.09 | 19.67 | 19.53 | 19.62 | 0.93 |
| 468.8975 | 44.96  | 19.95 | 22.41 | 22.35 | 22.25 | 1.74 |
| 468.9806 | 66.47  | 18.21 | 19.84 | 17.74 | 17.79 | 0.67 |
| 469.2572 | 151.12 | 14.81 | 12.44 | 13.66 | 13.40 | 1.14 |
| 469.2848 | 184.17 | 15.88 | 15.71 | 15.49 | 16.42 | 0.17 |
| 469.3100 | 200.66 | 16.16 | 14.87 | 15.04 | 15.37 | 0.81 |
| 469.8799 | 49     | 13.60 | 13.25 | 13.14 | 13.02 | 0.27 |
| 469.8908 | 33.27  | 14.47 | 13.86 | 14.43 | 13.70 | 0.27 |
| 469.9009 | 45.11  | 15.75 | 18.44 | 18.38 | 18.31 | 1.75 |
| 469.9113 | 31.86  | 13.39 | 15.45 | 15.34 | 14.79 | 1.16 |
| 469.9834 | 38.92  | 15.60 | 19.23 | 19.38 | 18.17 | 2.23 |
| 470.0008 | 28.66  | 11.57 | 14.23 | 14.15 | 12.73 | 1.51 |
| 470.0251 | 33.24  | 15.53 | 14.78 | 14.56 | 14.65 | 0.53 |
| 470.0617 | 20.6   | 15.35 | 15.49 | 14.76 | 15.16 | 0.12 |
| 470.0755 | 26.03  | 11.69 | 12.99 | 13.66 | 11.28 | 0.85 |
| 470.2878 | 178.78 | 12.32 | 12.30 | 11.91 | 13.50 | 0.01 |
| 470.3317 | 198.67 | 15.41 | 15.41 | 15.71 | 14.97 | 0.07 |
| 470.3492 | 202.31 | 15.83 | 19.52 | 19.37 | 18.85 | 1.96 |
| 470.7702 | 57.19  | 17.66 | 15.89 | 18.05 | 18.24 | 0.49 |
| 470.7916 | 84.28  | 12.93 | 10.83 | 13.94 | 11.63 | 0.27 |
| 470.8139 | 63.65  | 18.22 | 17.43 | 18.18 | 17.83 | 0.85 |
| 470.8348 | 41.96  | 22.18 | 23.00 | 23.09 | 22.91 | 1.76 |
| 470.8741 | 47.24  | 15.86 | 15.73 | 15.41 | 15.81 | 0.32 |
| 470.8925 | 39.34  | 18.89 | 19.97 | 19.90 | 19.98 | 1.69 |
| 470.9790 | 69     | 8.98  | 16.84 | 8.94  | 8.55  | 1.11 |
| 470.9970 | 63.4   | 14.03 | 21.09 | 11.74 | 12.53 | 0.69 |
| 471.0701 | 20.91  | 18.18 | 21.17 | 20.17 | 19.49 | 1.30 |
| 471.1526 | 22.23  | 15.38 | 16.22 | 16.09 | 15.33 | 0.39 |
| 471.1771 | 85.65  | 16.22 | 14.88 | 16.97 | 17.31 | 0.13 |

|          |        |       |       |       |       |      |
|----------|--------|-------|-------|-------|-------|------|
| 471.3334 | 250.06 | 15.27 | 15.32 | 15.69 | 14.56 | 0.07 |
| 471.3335 | 182.2  | 16.61 | 16.42 | 15.68 | 14.11 | 0.47 |
| 471.3518 | 199.44 | 14.33 | 16.97 | 16.87 | 16.76 | 1.91 |
| 471.8382 | 48.99  | 18.00 | 18.86 | 18.85 | 18.80 | 1.60 |
| 471.8874 | 30.9   | 13.89 | 14.47 | 14.38 | 14.13 | 0.37 |
| 471.8966 | 45.56  | 13.64 | 14.00 | 13.70 | 14.21 | 0.27 |
| 471.9985 | 62.33  | 14.90 | 17.81 | 13.42 | 13.84 | 0.45 |
| 472.0151 | 21.62  | 19.76 | 21.35 | 21.17 | 20.78 | 1.45 |
| 472.0558 | 20.66  | 17.80 | 21.33 | 21.25 | 20.25 | 1.64 |
| 472.1808 | 88.14  | 12.51 | 10.37 | 13.34 | 14.04 | 0.21 |
| 472.2148 | 174.64 | 10.32 | 10.84 | 11.30 | 10.53 | 0.32 |
| 472.2433 | 187.71 | 13.61 | 12.50 | 12.44 | 13.71 | 0.66 |
| 472.3324 | 182.68 | 14.80 | 16.30 | 15.06 | 14.87 | 0.50 |
| 472.3472 | 205.33 | 16.83 | 16.95 | 16.95 | 16.54 | 0.08 |
| 472.3649 | 189.04 | 13.71 | 14.30 | 14.53 | 14.06 | 0.40 |
| 472.7710 | 61.69  | 19.99 | 20.06 | 20.27 | 20.39 | 0.39 |
| 472.7929 | 73.31  | 15.62 | 15.04 | 15.95 | 15.70 | 0.21 |
| 472.8114 | 72.48  | 15.32 | 13.46 | 14.59 | 14.47 | 1.40 |
| 472.8338 | 43.32  | 19.92 | 20.65 | 20.58 | 20.68 | 1.50 |
| 472.8503 | 48.14  | 21.23 | 22.62 | 22.68 | 22.52 | 1.96 |
| 472.8875 | 44.64  | 16.54 | 17.02 | 16.82 | 17.27 | 0.59 |
| 472.9947 | 65.39  | 16.68 | 18.47 | 16.09 | 16.22 | 0.66 |
| 473.0173 | 23.75  | 15.75 | 16.87 | 16.60 | 16.42 | 1.17 |
| 473.0588 | 17.39  | 14.04 | 17.55 | 17.67 | 16.77 | 1.67 |
| 473.2393 | 64.07  | 11.34 | 21.44 | 9.29  | 9.75  | 0.85 |
| 473.2497 | 192.53 | 16.64 | 16.43 | 16.62 | 15.63 | 0.26 |
| 473.2833 | 176.8  | 19.96 | 19.83 | 20.21 | 19.72 | 0.00 |
| 473.3500 | 201    | 15.07 | 13.88 | 14.32 | 13.87 | 0.72 |
| 473.7514 | 190.95 | 15.15 | 14.78 | 15.20 | 13.96 | 0.20 |
| 473.7755 | 73.76  | 14.22 | 13.51 | 15.56 | 15.07 | 0.21 |
| 473.8394 | 33.39  | 15.29 | 16.54 | 16.06 | 16.08 | 1.06 |
| 473.8538 | 42.53  | 16.66 | 18.43 | 18.50 | 18.28 | 1.99 |
| 474.0109 | 26.35  | 16.48 | 18.19 | 18.12 | 17.35 | 1.39 |
| 474.1208 | 25.23  | 13.21 | 15.71 | 12.47 | 12.11 | 0.32 |
| 474.2427 | 55.85  | 17.70 | 19.17 | 17.22 | 17.28 | 0.60 |
| 474.2622 | 192.33 | 18.21 | 17.53 | 17.65 | 17.13 | 0.89 |
| 474.2866 | 176.81 | 18.20 | 18.00 | 18.40 | 17.89 | 0.11 |
| 474.3442 | 212.99 | 16.70 | 18.71 | 17.15 | 16.13 | 0.70 |
| 474.3636 | 229.31 | 16.50 | 15.65 | 15.71 | 15.49 | 0.74 |
| 474.7594 | 195.1  | 14.93 | 14.99 | 14.09 | 14.04 | 0.22 |
| 474.7705 | 69.09  | 18.29 | 18.26 | 19.14 | 18.72 | 0.65 |
| 474.7879 | 56.11  | 20.54 | 20.67 | 21.51 | 21.18 | 1.05 |
| 474.8289 | 58.12  | 16.19 | 14.84 | 15.80 | 16.05 | 1.08 |
| 474.8485 | 45     | 19.50 | 20.68 | 20.91 | 20.79 | 1.78 |
| 474.8634 | 36.22  | 17.40 | 18.67 | 18.84 | 18.73 | 1.62 |
| 474.8798 | 200.15 | 16.06 | 16.46 | 16.74 | 16.29 | 1.01 |
| 474.9088 | 21.03  | 16.33 | 15.75 | 15.70 | 15.91 | 0.38 |
| 474.9255 | 37.97  | 15.15 | 15.21 | 15.01 | 15.13 | 0.02 |
| 474.9671 | 31.78  | 14.52 | 15.02 | 14.71 | 14.78 | 0.27 |
| 475.0308 | 47.53  | 11.38 | 16.72 | 9.35  | 10.65 | 0.57 |
| 475.0595 | 25.56  | 16.16 | 19.34 | 16.40 | 16.26 | 1.07 |
| 475.1978 | 181.8  | 14.52 | 14.32 | 14.60 | 14.28 | 0.21 |
| 475.2088 | 191.57 | 15.44 | 12.21 | 13.04 | 13.29 | 1.47 |
| 475.2340 | 177.59 | 11.86 | 11.77 | 13.01 | 10.82 | 0.13 |
| 475.2454 | 63.36  | 13.49 | 14.98 | 11.46 | 12.27 | 0.15 |
| 475.2662 | 187.27 | 16.36 | 15.36 | 15.69 | 14.86 | 0.98 |
| 475.2886 | 181.72 | 16.93 | 15.28 | 15.80 | 15.38 | 1.42 |
| 475.3073 | 78.07  | 13.86 | 9.96  | 13.96 | 14.36 | 0.69 |
| 475.3074 | 250.08 | 14.97 | 15.67 | 16.33 | 15.49 | 0.40 |
| 475.3445 | 215.41 | 15.82 | 16.96 | 16.28 | 15.83 | 0.54 |
| 475.7915 | 57.1   | 15.48 | 14.09 | 16.64 | 16.03 | 0.15 |
| 475.8520 | 46.22  | 14.16 | 15.24 | 15.61 | 15.77 | 1.47 |

|          |        |       |       |       |       |      |
|----------|--------|-------|-------|-------|-------|------|
| 475.9280 | 31.07  | 12.39 | 12.56 | 13.82 | 11.88 | 0.35 |
| 475.9495 | 64.64  | 12.82 | 12.23 | 12.88 | 14.18 | 0.08 |
| 475.9604 | 26.5   | 17.34 | 16.53 | 16.37 | 16.43 | 0.86 |
| 476.0548 | 61.56  | 12.99 | 14.76 | 11.06 | 11.71 | 0.03 |
| 476.0755 | 18.79  | 15.18 | 16.41 | 16.10 | 15.91 | 0.43 |
| 476.2327 | 25.33  | 15.00 | 13.30 | 14.19 | 15.65 | 0.48 |
| 476.2788 | 199.1  | 23.09 | 23.11 | 23.07 | 22.74 | 0.07 |
| 476.3023 | 226.06 | 16.95 | 14.07 | 15.44 | 16.58 | 1.12 |
| 476.7684 | 75.55  | 14.20 | 12.99 | 14.66 | 14.10 | 0.34 |
| 476.7850 | 50.96  | 18.81 | 18.67 | 19.69 | 19.32 | 0.58 |
| 476.8414 | 43.63  | 16.75 | 17.51 | 17.78 | 17.13 | 0.99 |
| 476.8634 | 46.05  | 18.11 | 17.31 | 17.12 | 17.78 | 0.72 |
| 476.8774 | 197.1  | 15.54 | 15.70 | 16.33 | 15.89 | 0.65 |
| 476.8843 | 47.66  | 16.93 | 17.23 | 18.13 | 17.64 | 0.80 |
| 477.0025 | 52.22  | 14.27 | 11.04 | 16.17 | 15.45 | 0.29 |
| 477.0094 | 62.11  | 12.87 | 22.63 | 11.07 | 11.33 | 0.88 |
| 477.1619 | 22.69  | 15.61 | 16.29 | 15.84 | 15.36 | 0.25 |
| 477.2237 | 163.49 | 14.23 | 15.33 | 15.91 | 14.96 | 1.29 |
| 477.2497 | 188.59 | 15.15 | 15.51 | 15.88 | 15.39 | 0.39 |
| 477.2823 | 198.93 | 21.02 | 20.98 | 20.98 | 20.64 | 0.14 |
| 477.3042 | 199.09 | 19.77 | 20.33 | 20.47 | 20.06 | 0.65 |
| 477.3244 | 276.85 | 17.37 | 16.82 | 16.95 | 17.07 | 0.45 |
| 477.9582 | 28.82  | 15.95 | 15.40 | 15.02 | 15.10 | 0.67 |
| 478.0130 | 53.98  | 13.01 | 19.71 | 10.84 | 11.55 | 0.69 |
| 478.1656 | 21.47  | 19.12 | 20.09 | 19.82 | 19.20 | 0.65 |
| 478.2842 | 202.45 | 17.00 | 16.52 | 16.27 | 15.96 | 0.31 |
| 478.2946 | 218.01 | 24.07 | 24.29 | 24.21 | 23.91 | 0.27 |
| 478.3081 | 199.36 | 16.97 | 18.23 | 18.51 | 18.08 | 1.08 |
| 478.7174 | 81.15  | 13.96 | 12.97 | 14.53 | 14.29 | 0.18 |
| 478.7806 | 61.31  | 16.32 | 13.18 | 16.00 | 16.08 | 1.13 |
| 478.7982 | 73.43  | 17.02 | 15.54 | 16.16 | 16.10 | 1.20 |
| 478.8219 | 54.6   | 18.40 | 17.67 | 18.95 | 18.81 | 0.13 |
| 478.8420 | 57.15  | 14.94 | 11.90 | 13.97 | 14.59 | 1.34 |
| 478.8604 | 58.87  | 15.64 | 9.58  | 11.99 | 12.39 | 1.26 |
| 478.8796 | 35.03  | 17.44 | 19.62 | 19.05 | 19.14 | 1.36 |
| 478.9401 | 73.85  | 12.97 | 12.92 | 12.83 | 13.86 | 0.02 |
| 479.0077 | 61.83  | 14.04 | 20.19 | 12.18 | 12.80 | 0.73 |
| 479.0886 | 18.36  | 17.46 | 19.52 | 19.51 | 19.07 | 1.66 |
| 479.1823 | 224.39 | 10.72 | 12.90 | 14.62 | 14.28 | 1.42 |
| 479.2846 | 178.91 | 17.55 | 17.05 | 17.45 | 16.31 | 0.47 |
| 479.2980 | 216.78 | 21.96 | 22.22 | 22.13 | 21.84 | 0.33 |
| 479.3167 | 204.24 | 18.69 | 19.21 | 19.30 | 19.47 | 0.58 |
| 479.3386 | 277.68 | 15.10 | 15.18 | 14.64 | 14.53 | 0.08 |
| 479.9193 | 35.91  | 17.24 | 18.03 | 18.32 | 17.49 | 0.84 |
| 479.9426 | 38.63  | 13.16 | 12.35 | 11.12 | 15.25 | 0.56 |
| 480.0110 | 62.44  | 13.00 | 16.70 | 10.91 | 11.64 | 0.40 |
| 480.0785 | 17.55  | 12.27 | 16.24 | 16.10 | 15.37 | 1.56 |
| 480.0924 | 20.14  | 12.02 | 15.15 | 14.86 | 13.92 | 1.31 |
| 480.2733 | 176.76 | 14.89 | 16.01 | 16.07 | 15.89 | 1.12 |
| 480.2954 | 198.65 | 18.07 | 19.04 | 19.01 | 18.53 | 0.88 |
| 480.3102 | 247.82 | 24.16 | 20.82 | 19.79 | 22.31 | 1.98 |
| 480.3239 | 207.74 | 15.95 | 17.14 | 17.24 | 17.44 | 0.99 |
| 480.7152 | 75.04  | 10.70 | 10.95 | 12.16 | 11.63 | 0.36 |
| 480.7378 | 80.62  | 15.84 | 16.66 | 16.77 | 16.19 | 1.04 |
| 480.8048 | 47.03  | 17.86 | 16.84 | 18.11 | 17.96 | 0.51 |
| 480.8180 | 65.27  | 17.90 | 15.17 | 16.50 | 16.79 | 1.56 |
| 480.8718 | 31.65  | 16.83 | 16.49 | 16.63 | 16.16 | 0.26 |
| 480.9319 | 25.33  | 14.98 | 15.85 | 15.90 | 16.33 | 0.98 |
| 480.9446 | 59.16  | 13.60 | 13.28 | 14.85 | 15.08 | 0.35 |
| 480.9548 | 42.71  | 15.14 | 14.84 | 14.74 | 15.19 | 0.16 |
| 481.0051 | 26.67  | 13.00 | 14.65 | 14.95 | 13.75 | 1.15 |
| 481.2365 | 145.42 | 12.49 | 11.38 | 13.64 | 12.02 | 0.05 |



|          |        |       |       |       |       |      |
|----------|--------|-------|-------|-------|-------|------|
| 481.2578 | 129.38 | 21.57 | 20.90 | 21.20 | 20.89 | 0.81 |
| 481.2786 | 171.28 | 12.71 | 13.08 | 13.49 | 13.71 | 0.44 |
| 481.3007 | 193.72 | 18.47 | 18.01 | 18.49 | 18.27 | 0.34 |
| 481.3023 | 290.21 | 14.58 | 16.35 | 16.52 | 16.98 | 1.22 |
| 481.3137 | 255.92 | 22.30 | 18.53 | 17.14 | 20.25 | 1.93 |
| 481.3540 | 192.13 | 15.39 | 15.50 | 15.20 | 15.60 | 0.00 |
| 481.8561 | 38.39  | 14.04 | 13.77 | 13.75 | 12.66 | 0.16 |
| 481.8662 | 43.07  | 15.62 | 16.95 | 16.67 | 16.02 | 0.98 |
| 481.9151 | 36.51  | 13.81 | 13.46 | 13.13 | 13.52 | 0.25 |
| 481.9414 | 57.87  | 13.28 | 15.03 | 16.72 | 16.07 | 1.40 |
| 482.0312 | 30.75  | 10.51 | 14.13 | 12.32 | 11.13 | 0.95 |
| 482.0598 | 21.27  | 14.27 | 13.65 | 14.23 | 14.02 | 0.22 |
| 482.1047 | 19.45  | 16.42 | 17.87 | 17.69 | 18.54 | 1.12 |
| 482.2608 | 132.91 | 19.43 | 18.52 | 18.90 | 18.59 | 0.88 |
| 482.3033 | 187.06 | 16.44 | 15.69 | 16.06 | 16.33 | 0.60 |
| 482.3147 | 206.26 | 17.80 | 16.77 | 16.12 | 15.62 | 1.04 |
| 482.7359 | 93.36  | 13.67 | 13.76 | 13.72 | 13.18 | 0.01 |
| 482.7542 | 84.29  | 17.11 | 17.25 | 17.13 | 16.98 | 0.08 |
| 482.8036 | 56.36  | 15.37 | 13.53 | 15.87 | 15.09 | 0.54 |
| 482.8158 | 61.04  | 14.85 | 11.88 | 13.37 | 12.46 | 1.31 |
| 482.8481 | 36.73  | 14.00 | 15.38 | 15.37 | 15.15 | 1.31 |
| 482.8684 | 32.25  | 14.67 | 14.47 | 15.67 | 13.51 | 0.07 |
| 482.8907 | 48.97  | 17.44 | 18.95 | 18.94 | 18.91 | 1.77 |
| 482.9132 | 45.83  | 19.05 | 20.58 | 20.58 | 20.62 | 1.55 |
| 483.0174 | 61.74  | 13.27 | 21.26 | 11.25 | 11.84 | 0.79 |
| 483.1079 | 20.83  | 11.72 | 13.76 | 13.79 | 14.78 | 0.83 |
| 483.2597 | 153.21 | 14.33 | 13.59 | 13.45 | 15.05 | 0.26 |
| 483.2736 | 170.73 | 25.04 | 24.58 | 24.89 | 24.32 | 0.58 |
| 483.8718 | 37.62  | 16.45 | 16.35 | 16.86 | 15.61 | 0.01 |
| 483.8857 | 33.6   | 13.45 | 12.98 | 11.62 | 14.26 | 0.38 |
| 483.9166 | 44.57  | 14.86 | 16.35 | 16.30 | 16.39 | 1.36 |
| 483.9656 | 52.21  | 13.46 | 10.25 | 13.40 | 13.78 | 0.69 |
| 484.0211 | 62.18  | 14.47 | 18.17 | 12.92 | 13.42 | 0.56 |
| 484.0729 | 17.49  | 12.32 | 14.25 | 13.30 | 13.78 | 0.55 |
| 484.2770 | 163.48 | 23.07 | 22.53 | 22.80 | 22.32 | 0.74 |
| 484.3286 | 195.75 | 18.17 | 19.62 | 19.05 | 18.39 | 0.98 |
| 484.3648 | 209.59 | 12.82 | 16.33 | 16.19 | 15.11 | 1.83 |
| 484.7506 | 88.08  | 14.48 | 14.14 | 14.31 | 13.30 | 0.29 |
| 484.8273 | 64.64  | 15.91 | 15.33 | 16.24 | 16.05 | 0.18 |
| 484.8295 | 154.78 | 14.60 | 9.92  | 9.92  | 12.66 | 1.38 |
| 484.8508 | 50     | 19.82 | 19.75 | 19.85 | 20.00 | 0.00 |
| 484.8715 | 40.92  | 21.05 | 23.20 | 23.24 | 23.09 | 1.90 |
| 484.9093 | 44.97  | 16.29 | 15.32 | 15.51 | 16.03 | 0.51 |
| 484.9550 | 59.36  | 16.83 | 19.07 | 16.23 | 16.35 | 0.73 |
| 484.9937 | 28.65  | 11.90 | 14.13 | 13.61 | 13.89 | 1.00 |
| 485.0150 | 62.95  | 12.12 | 18.11 | 10.33 | 10.82 | 0.70 |
| 485.0760 | 17.9   | 12.41 | 14.37 | 12.37 | 13.07 | 0.36 |
| 485.1343 | 68.38  | 14.17 | 10.80 | 13.72 | 14.97 | 0.74 |
| 485.2496 | 187.1  | 15.12 | 14.42 | 14.60 | 14.41 | 0.52 |
| 485.2681 | 167.68 | 10.96 | 16.14 | 15.09 | 15.77 | 1.46 |
| 485.2794 | 163.41 | 20.59 | 19.96 | 20.25 | 19.90 | 0.83 |
| 485.3319 | 196.66 | 15.82 | 17.52 | 16.81 | 16.09 | 0.85 |
| 485.3492 | 256.75 | 15.77 | 16.31 | 15.91 | 15.56 | 0.18 |
| 485.7516 | 187.1  | 13.51 | 12.08 | 12.61 | 12.99 | 0.67 |
| 485.8539 | 54.47  | 14.52 | 13.40 | 13.61 | 13.82 | 0.83 |
| 485.8748 | 41.14  | 16.39 | 19.30 | 19.38 | 19.22 | 1.81 |
| 485.8854 | 33.1   | 14.91 | 15.86 | 16.03 | 15.64 | 1.07 |
| 485.9030 | 36.71  | 10.68 | 12.48 | 12.87 | 12.24 | 0.87 |
| 485.9571 | 40.33  | 15.36 | 18.71 | 19.01 | 17.72 | 2.09 |
| 485.9870 | 25.57  | 15.33 | 17.46 | 17.79 | 17.26 | 1.39 |
| 486.1166 | 22.92  | 12.55 | 13.73 | 14.50 | 14.42 | 0.75 |
| 486.2574 | 192.35 | 14.16 | 14.28 | 14.07 | 14.25 | 0.02 |

|          |        |       |       |       |       |      |
|----------|--------|-------|-------|-------|-------|------|
| 486.2712 | 167.5  | 9.33  | 13.77 | 13.47 | 13.41 | 1.47 |
| 486.2820 | 170.82 | 17.63 | 16.89 | 17.17 | 16.92 | 0.98 |
| 486.2997 | 215.7  | 14.37 | 14.48 | 14.74 | 14.89 | 0.19 |
| 486.3444 | 227.52 | 18.54 | 16.87 | 16.00 | 16.50 | 1.14 |
| 486.7618 | 79.94  | 14.01 | 9.79  | 10.82 | 11.26 | 1.51 |
| 486.7881 | 65.71  | 17.29 | 17.03 | 17.92 | 17.53 | 0.24 |
| 486.8089 | 48.7   | 22.38 | 22.71 | 23.22 | 23.03 | 1.31 |
| 486.8464 | 149.81 | 15.08 | 10.62 | 9.49  | 12.41 | 1.59 |
| 486.8677 | 47.28  | 19.68 | 20.66 | 20.79 | 20.76 | 1.77 |
| 486.9532 | 69.33  | 11.19 | 16.61 | 10.07 | 10.38 | 0.80 |
| 486.9713 | 63.87  | 13.76 | 20.18 | 11.42 | 12.33 | 0.63 |
| 487.0659 | 20.06  | 14.51 | 18.43 | 17.85 | 17.17 | 1.72 |
| 487.1514 | 87.11  | 14.82 | 15.19 | 17.21 | 17.20 | 0.74 |
| 487.2841 | 168.47 | 14.08 | 13.91 | 14.47 | 14.16 | 0.05 |
| 487.3060 | 169.97 | 13.56 | 13.34 | 13.54 | 14.11 | 0.04 |
| 487.3473 | 212.57 | 16.09 | 14.99 | 11.84 | 12.83 | 0.87 |
| 487.8123 | 55.93  | 18.24 | 18.42 | 19.12 | 18.90 | 1.05 |
| 487.8620 | 23.03  | 12.44 | 11.63 | 13.23 | 12.74 | 0.02 |
| 487.8717 | 47.32  | 14.99 | 15.90 | 15.94 | 15.94 | 1.35 |
| 487.9721 | 64.77  | 12.28 | 16.63 | 11.57 | 12.75 | 0.72 |
| 488.0194 | 22.05  | 12.76 | 16.56 | 16.36 | 15.47 | 1.93 |
| 488.1547 | 85.81  | 11.26 | 11.26 | 13.93 | 13.81 | 0.55 |
| 488.2275 | 94.23  | 8.57  | 13.28 | 10.75 | 9.54  | 1.18 |
| 488.3154 | 241.35 | 16.30 | 15.69 | 15.40 | 15.30 | 0.52 |
| 488.3599 | 187.66 | 12.94 | 16.25 | 16.08 | 14.84 | 2.10 |
| 488.7463 | 69.82  | 18.01 | 18.71 | 19.40 | 18.94 | 1.13 |
| 488.7673 | 69.82  | 15.72 | 15.99 | 17.03 | 16.57 | 0.85 |
| 488.7857 | 72.85  | 15.50 | 14.37 | 15.65 | 15.28 | 0.63 |
| 488.8081 | 51.31  | 20.54 | 20.75 | 21.35 | 21.14 | 1.28 |
| 488.8244 | 47.08  | 21.31 | 22.13 | 22.59 | 22.37 | 1.85 |
| 488.8626 | 47.87  | 17.33 | 17.29 | 17.46 | 17.65 | 0.11 |
| 488.8792 | 36.81  | 14.08 | 13.27 | 13.96 | 14.21 | 0.28 |
| 488.9411 | 25.06  | 15.63 | 16.14 | 16.29 | 16.66 | 0.48 |
| 488.9689 | 66.81  | 14.62 | 17.62 | 13.21 | 13.66 | 0.50 |
| 488.9886 | 48.36  | 13.60 | 12.81 | 13.71 | 13.15 | 0.25 |
| 489.0432 | 18.68  | 15.74 | 16.02 | 15.96 | 16.73 | 0.19 |
| 489.2131 | 63.39  | 13.71 | 23.87 | 11.38 | 12.07 | 0.82 |
| 489.2783 | 184.88 | 19.20 | 20.97 | 21.99 | 20.67 | 1.86 |
| 489.3227 | 243.72 | 16.66 | 14.12 | 14.55 | 15.49 | 1.06 |
| 489.7496 | 70.46  | 12.16 | 9.89  | 12.12 | 10.98 | 0.81 |
| 489.8102 | 56.89  | 15.83 | 15.17 | 16.52 | 16.32 | 0.01 |
| 489.8280 | 54     | 17.03 | 17.76 | 18.41 | 18.11 | 1.69 |
| 489.9060 | 58.06  | 13.28 | 14.42 | 14.35 | 14.34 | 0.72 |
| 489.9862 | 50.76  | 13.41 | 16.29 | 16.51 | 15.02 | 1.62 |
| 490.2165 | 56.45  | 19.86 | 21.57 | 19.43 | 19.49 | 0.72 |
| 490.2815 | 184.64 | 17.42 | 19.11 | 20.17 | 18.86 | 1.83 |
| 490.3031 | 293.15 | 18.58 | 16.77 | 16.45 | 17.73 | 1.57 |
| 490.7446 | 70.52  | 16.60 | 16.86 | 17.97 | 17.31 | 0.89 |
| 490.7620 | 64.13  | 18.90 | 19.15 | 20.11 | 19.73 | 0.88 |
| 490.8043 | 51.18  | 16.58 | 15.65 | 17.14 | 17.00 | 0.26 |
| 490.8219 | 49.42  | 19.85 | 20.37 | 20.94 | 20.67 | 1.49 |
| 490.8375 | 38.73  | 18.18 | 19.31 | 19.48 | 19.41 | 1.66 |
| 490.8548 | 38.15  | 13.36 | 11.08 | 13.28 | 11.47 | 0.55 |
| 490.8790 | 49.92  | 15.04 | 11.96 | 11.20 | 12.99 | 0.83 |
| 490.9005 | 37.71  | 17.82 | 19.83 | 19.42 | 19.56 | 1.32 |
| 490.9411 | 33.17  | 15.28 | 14.22 | 14.02 | 14.72 | 0.66 |
| 491.0272 | 49.48  | 14.02 | 18.38 | 10.80 | 11.49 | 0.19 |
| 491.1930 | 172.21 | 13.21 | 12.64 | 13.49 | 12.80 | 0.20 |
| 491.2105 | 64.61  | 14.33 | 19.46 | 12.59 | 13.12 | 0.66 |
| 491.2206 | 64.6   | 15.19 | 16.37 | 14.15 | 14.48 | 0.10 |
| 491.2843 | 185.2  | 14.89 | 16.38 | 17.51 | 16.05 | 1.60 |
| 491.3031 | 237.47 | 15.10 | 14.92 | 15.50 | 15.73 | 0.07 |

|          |        |       |       |       |       |      |
|----------|--------|-------|-------|-------|-------|------|
| 491.3207 | 204.31 | 16.80 | 17.26 | 17.41 | 17.34 | 0.51 |
| 491.3387 | 254.82 | 14.82 | 14.27 | 14.58 | 14.23 | 0.14 |
| 491.7653 | 68.03  | 13.63 | 10.94 | 14.31 | 13.45 | 0.64 |
| 491.8257 | 54.13  | 14.91 | 14.91 | 15.78 | 15.74 | 0.73 |
| 491.9236 | 64.74  | 12.30 | 12.48 | 13.80 | 14.52 | 0.64 |
| 491.9343 | 27.6   | 16.91 | 14.29 | 13.59 | 14.54 | 1.21 |
| 491.9648 | 26.67  | 10.06 | 14.30 | 14.63 | 12.75 | 1.81 |
| 492.1817 | 174.37 | 13.00 | 7.75  | 8.89  | 8.77  | 1.68 |
| 492.2145 | 64.85  | 15.36 | 16.80 | 14.37 | 14.67 | 0.25 |
| 492.2871 | 184.41 | 9.06  | 10.37 | 12.91 | 9.98  | 1.10 |
| 492.3095 | 206.58 | 14.43 | 13.59 | 11.80 | 13.46 | 0.51 |
| 492.3238 | 204.27 | 14.02 | 14.81 | 15.05 | 14.89 | 0.51 |
| 492.3454 | 211.01 | 15.95 | 14.14 | 13.82 | 14.43 | 0.77 |
| 492.7426 | 73.56  | 11.91 | 10.12 | 13.11 | 13.04 | 0.13 |
| 492.7578 | 57.26  | 17.56 | 16.22 | 18.24 | 17.86 | 0.37 |
| 492.8174 | 53.25  | 16.80 | 16.51 | 17.22 | 16.57 | 0.01 |
| 492.8373 | 38.66  | 17.80 | 17.81 | 17.20 | 17.72 | 0.31 |
| 492.8583 | 54.49  | 16.45 | 16.10 | 17.27 | 17.09 | 0.28 |
| 492.8953 | 40.01  | 14.99 | 15.58 | 14.52 | 15.30 | 0.08 |
| 492.9766 | 57.26  | 13.85 | 13.33 | 16.48 | 15.93 | 0.47 |
| 493.0044 | 62.06  | 13.59 | 16.16 | 11.64 | 12.33 | 0.21 |
| 493.0266 | 23.12  | 11.25 | 15.63 | 14.29 | 14.73 | 1.40 |
| 493.0536 | 24.53  | 14.75 | 16.79 | 15.00 | 15.09 | 0.55 |
| 493.1594 | 84.11  | 12.33 | 10.49 | 12.50 | 13.18 | 0.28 |
| 493.1981 | 156.93 | 10.82 | 11.98 | 12.50 | 12.23 | 0.86 |
| 493.2617 | 170.75 | 13.62 | 12.94 | 13.93 | 11.61 | 0.28 |
| 493.3010 | 197.17 | 15.38 | 14.93 | 14.90 | 15.28 | 0.51 |
| 493.3023 | 290.85 | 12.95 | 15.77 | 15.97 | 16.05 | 1.41 |
| 493.3366 | 213.11 | 16.26 | 16.55 | 16.68 | 16.82 | 0.37 |
| 493.9287 | 33.59  | 16.41 | 14.30 | 13.64 | 15.18 | 1.26 |
| 493.9974 | 20.62  | 18.41 | 18.60 | 18.84 | 18.63 | 0.41 |
| 494.0379 | 24.68  | 14.37 | 17.31 | 17.49 | 16.84 | 1.55 |
| 494.0925 | 20.49  | 11.88 | 14.64 | 12.98 | 13.50 | 0.85 |
| 494.1437 | 64.53  | 14.43 | 15.10 | 12.99 | 13.48 | 0.42 |
| 494.2528 | 97.67  | 17.18 | 13.81 | 14.80 | 14.76 | 1.58 |
| 494.2896 | 182.42 | 14.13 | 11.59 | 12.78 | 10.96 | 1.06 |
| 494.3258 | 182.93 | 8.94  | 14.13 | 15.43 | 12.37 | 1.77 |
| 494.3396 | 212.77 | 13.75 | 13.82 | 13.91 | 13.95 | 0.07 |
| 494.7521 | 63.86  | 16.22 | 13.45 | 16.16 | 16.38 | 1.08 |
| 494.7718 | 57.5   | 16.25 | 13.63 | 16.10 | 16.02 | 0.78 |
| 494.8151 | 45.61  | 14.72 | 9.78  | 11.68 | 12.73 | 1.29 |
| 494.8345 | 59.98  | 15.38 | 10.50 | 11.51 | 12.89 | 1.64 |
| 494.8536 | 42.06  | 18.84 | 20.51 | 20.07 | 20.01 | 1.46 |
| 494.9117 | 39.21  | 12.29 | 15.49 | 15.15 | 15.52 | 1.15 |
| 494.9710 | 145.09 | 14.75 | 14.45 | 14.54 | 14.55 | 0.29 |
| 494.9719 | 21.96  | 12.43 | 17.53 | 17.52 | 16.20 | 1.55 |
| 495.0994 | 18.5   | 11.51 | 16.64 | 16.88 | 16.61 | 1.80 |
| 495.2210 | 56.63  | 13.78 | 19.20 | 11.68 | 12.38 | 0.60 |
| 495.2731 | 166.28 | 16.77 | 15.88 | 16.39 | 16.27 | 1.02 |
| 495.3182 | 288.36 | 18.77 | 20.96 | 21.39 | 21.37 | 1.76 |
| 495.8567 | 44.17  | 13.74 | 15.16 | 14.44 | 14.79 | 0.75 |
| 495.8929 | 36.54  | 17.38 | 17.67 | 18.25 | 17.20 | 0.34 |
| 495.9155 | 39.82  | 10.53 | 9.49  | 9.23  | 13.48 | 0.34 |
| 495.9927 | 23.51  | 13.76 | 13.85 | 13.86 | 13.28 | 0.01 |
| 496.2246 | 65.64  | 15.17 | 16.42 | 14.03 | 14.38 | 0.08 |
| 496.2683 | 155.63 | 20.63 | 19.87 | 20.19 | 19.95 | 0.90 |
| 496.3050 | 210.37 | 15.21 | 16.55 | 16.75 | 16.07 | 0.78 |
| 496.3212 | 293.62 | 15.13 | 18.99 | 19.05 | 18.50 | 1.68 |
| 496.7124 | 91.1   | 14.56 | 16.23 | 16.10 | 15.64 | 1.37 |
| 496.7712 | 71.26  | 15.71 | 13.69 | 14.42 | 14.18 | 1.57 |
| 496.7830 | 30.12  | 13.57 | 12.47 | 14.15 | 12.48 | 0.24 |
| 496.7910 | 65.99  | 18.33 | 16.94 | 17.44 | 17.45 | 1.19 |

|          |        |       |       |       |       |      |
|----------|--------|-------|-------|-------|-------|------|
| 496.8475 | 38.48  | 16.81 | 17.89 | 18.22 | 17.46 | 1.13 |
| 496.9063 | 34.25  | 14.82 | 14.67 | 14.27 | 14.79 | 0.34 |
| 496.9289 | 45.9   | 17.17 | 17.48 | 17.56 | 17.71 | 0.33 |
| 496.9488 | 34.86  | 13.62 | 15.27 | 15.29 | 15.18 | 1.29 |
| 497.0306 | 42.6   | 14.35 | 17.55 | 12.81 | 13.70 | 0.34 |
| 497.2724 | 155.79 | 18.51 | 17.66 | 18.01 | 17.75 | 0.97 |
| 497.2896 | 178.54 | 17.92 | 16.98 | 17.59 | 17.25 | 0.89 |
| 497.3117 | 208.76 | 11.78 | 12.37 | 12.58 | 13.04 | 0.24 |
| 497.3149 | 291.03 | 13.36 | 15.95 | 15.97 | 15.81 | 1.48 |
| 497.3295 | 193.24 | 15.95 | 15.71 | 15.69 | 15.21 | 0.33 |
| 497.3492 | 166.61 | 14.15 | 13.86 | 14.45 | 14.44 | 0.01 |
| 497.8402 | 58.17  | 14.94 | 14.36 | 15.96 | 15.43 | 0.15 |
| 497.8902 | 37.36  | 14.14 | 13.99 | 14.07 | 13.64 | 0.08 |
| 497.9241 | 35.84  | 12.41 | 13.21 | 13.47 | 13.62 | 0.56 |
| 498.0337 | 20.52  | 13.83 | 15.07 | 14.60 | 13.74 | 0.51 |
| 498.2634 | 184.23 | 19.72 | 19.68 | 20.03 | 19.21 | 0.06 |
| 498.2745 | 156.09 | 15.58 | 13.62 | 14.27 | 14.13 | 1.25 |
| 498.2908 | 22.23  | 17.04 | 16.74 | 14.86 | 17.06 | 0.34 |
| 498.2922 | 177.99 | 15.70 | 14.25 | 15.05 | 14.77 | 0.98 |
| 498.3408 | 193.13 | 15.47 | 16.31 | 15.83 | 14.79 | 0.34 |
| 498.7108 | 77.37  | 9.96  | 12.13 | 12.19 | 11.76 | 1.07 |
| 498.7283 | 75.18  | 15.31 | 16.82 | 16.64 | 16.15 | 1.36 |
| 498.7872 | 69.37  | 15.49 | 14.30 | 15.31 | 14.78 | 0.74 |
| 498.8217 | 41.63  | 13.13 | 14.75 | 14.77 | 14.85 | 1.14 |
| 498.8429 | 35.19  | 14.68 | 14.77 | 15.58 | 14.25 | 0.20 |
| 498.8653 | 38.82  | 17.97 | 18.98 | 19.12 | 19.02 | 1.62 |
| 498.8871 | 47.59  | 19.99 | 21.24 | 21.34 | 21.31 | 1.67 |
| 498.9311 | 91.98  | 17.83 | 18.42 | 17.06 | 18.50 | 0.06 |
| 498.9916 | 62.51  | 14.14 | 22.01 | 12.29 | 12.83 | 0.82 |
| 499.0530 | 22.6   | 19.79 | 20.18 | 19.83 | 19.53 | 0.14 |
| 499.0628 | 16.87  | 13.87 | 15.58 | 14.50 | 15.16 | 0.73 |
| 499.2667 | 188.57 | 17.72 | 17.66 | 18.05 | 17.13 | 0.04 |
| 499.2842 | 181.57 | 15.56 | 10.75 | 8.61  | 9.06  | 1.90 |
| 499.2951 | 172.99 | 14.30 | 12.92 | 12.98 | 13.66 | 0.87 |
| 499.3075 | 220.74 | 13.00 | 15.11 | 14.92 | 14.68 | 0.59 |
| 499.3651 | 266.94 | 15.73 | 14.98 | 16.04 | 15.44 | 0.12 |
| 499.8906 | 41.12  | 15.39 | 17.03 | 17.25 | 17.23 | 1.48 |
| 499.9952 | 54.69  | 15.27 | 19.07 | 14.23 | 14.54 | 0.76 |
| 500.0235 | 102.76 | 7.13  | 14.48 | 14.25 | 13.87 | 1.96 |
| 500.0532 | 18.67  | 16.24 | 16.15 | 15.71 | 15.99 | 0.23 |
| 500.0952 | 22.63  | 12.40 | 12.97 | 14.75 | 14.18 | 0.81 |
| 500.2671 | 189.04 | 12.85 | 12.55 | 12.35 | 11.06 | 0.32 |
| 500.2789 | 197.42 | 24.07 | 24.03 | 24.17 | 23.53 | 0.09 |
| 500.3602 | 224.78 | 16.33 | 14.49 | 10.99 | 12.13 | 1.05 |
| 500.7231 | 88.98  | 14.20 | 12.83 | 12.93 | 13.09 | 0.87 |
| 500.8037 | 148.26 | 15.34 | 12.42 | 13.31 | 14.17 | 1.55 |
| 500.8247 | 51.25  | 19.99 | 19.39 | 19.79 | 20.12 | 0.74 |
| 500.8495 | 40.75  | 21.38 | 23.21 | 23.42 | 23.22 | 1.90 |
| 500.8630 | 41.28  | 15.10 | 12.64 | 13.65 | 13.96 | 0.91 |
| 500.8840 | 45.26  | 17.54 | 18.27 | 18.35 | 18.56 | 1.29 |
| 500.9895 | 62.4   | 16.60 | 19.61 | 15.99 | 16.14 | 0.86 |
| 501.0484 | 22.85  | 16.85 | 16.98 | 16.62 | 16.18 | 0.07 |
| 501.0706 | 24.73  | 16.66 | 16.95 | 17.35 | 16.87 | 0.46 |
| 501.2245 | 183.69 | 14.66 | 10.45 | 10.15 | 11.50 | 1.87 |
| 501.2823 | 194.37 | 22.19 | 22.11 | 22.26 | 21.66 | 0.13 |
| 501.3228 | 212.72 | 14.90 | 14.45 | 14.95 | 15.70 | 0.05 |
| 501.3957 | 290.99 | 14.41 | 14.59 | 15.04 | 14.28 | 0.19 |
| 501.6663 | 17.19  | 11.65 | 15.95 | 16.16 | 14.16 | 2.12 |
| 501.8280 | 60.14  | 14.92 | 13.12 | 14.02 | 14.20 | 1.04 |
| 501.8534 | 42.76  | 17.69 | 19.39 | 19.67 | 19.45 | 1.84 |
| 501.8596 | 29.19  | 14.09 | 15.02 | 14.91 | 14.59 | 0.58 |
| 501.9275 | 37.99  | 15.65 | 18.09 | 17.29 | 16.87 | 1.56 |

|          |        |       |       |       |       |      |
|----------|--------|-------|-------|-------|-------|------|
| 501.9919 | 53.03  | 8.14  | 15.86 | 12.24 | 8.74  | 1.28 |
| 502.0069 | 47.91  | 13.04 | 15.72 | 16.17 | 14.18 | 1.45 |
| 502.0318 | 18.34  | 11.53 | 14.23 | 13.45 | 13.47 | 0.89 |
| 502.2710 | 192.72 | 16.31 | 13.92 | 13.73 | 14.69 | 1.67 |
| 502.2858 | 194.22 | 19.40 | 19.10 | 19.34 | 18.66 | 0.39 |
| 502.2946 | 207.09 | 19.61 | 19.99 | 19.98 | 19.59 | 0.46 |
| 502.7359 | 84.97  | 14.23 | 12.21 | 13.23 | 12.58 | 1.11 |
| 502.7620 | 80.62  | 14.74 | 14.96 | 15.36 | 15.36 | 0.47 |
| 502.7828 | 50.78  | 21.96 | 22.01 | 22.95 | 22.71 | 0.93 |
| 502.8031 | 67.18  | 15.37 | 13.55 | 16.12 | 15.84 | 0.43 |
| 502.8203 | 140.31 | 15.83 | 13.79 | 13.57 | 14.43 | 1.42 |
| 502.8425 | 49.58  | 20.01 | 21.03 | 21.36 | 21.24 | 1.84 |
| 502.9476 | 66.61  | 12.95 | 12.06 | 13.19 | 14.16 | 0.12 |
| 503.2396 | 165.48 | 14.22 | 14.70 | 14.77 | 13.83 | 0.36 |
| 503.2659 | 154.71 | 13.70 | 9.82  | 11.29 | 13.44 | 1.25 |
| 503.2850 | 187.6  | 16.46 | 15.73 | 16.01 | 15.24 | 0.73 |
| 503.2981 | 203.17 | 17.67 | 17.95 | 17.96 | 17.53 | 0.30 |
| 503.3386 | 202.3  | 14.77 | 14.90 | 14.91 | 15.04 | 0.08 |
| 503.7863 | 57.63  | 17.85 | 17.45 | 18.87 | 18.57 | 0.42 |
| 503.8462 | 49.41  | 15.25 | 16.52 | 16.84 | 16.74 | 1.69 |
| 503.9418 | 50.77  | 14.61 | 15.54 | 16.54 | 16.22 | 0.86 |
| 504.1183 | 29.46  | 12.56 | 16.31 | 16.75 | 14.52 | 1.77 |
| 504.2718 | 216.72 | 17.78 | 17.80 | 17.60 | 17.70 | 0.08 |
| 504.2940 | 211.14 | 15.68 | 15.99 | 15.74 | 15.99 | 0.28 |
| 504.3104 | 217.14 | 20.46 | 21.31 | 21.02 | 20.93 | 1.02 |
| 504.7416 | 71.17  | 14.54 | 14.90 | 15.83 | 15.14 | 0.61 |
| 504.7600 | 84.75  | 14.77 | 13.72 | 14.01 | 13.96 | 0.90 |
| 504.7815 | 49.45  | 20.39 | 20.39 | 21.33 | 21.08 | 0.86 |
| 504.7990 | 53.8   | 20.81 | 21.24 | 22.01 | 21.75 | 1.38 |
| 504.8383 | 45.07  | 17.17 | 16.85 | 17.59 | 17.68 | 0.10 |
| 504.8529 | 38.16  | 14.37 | 14.09 | 13.47 | 14.37 | 0.26 |
| 504.9454 | 19.11  | 10.22 | 13.32 | 13.95 | 13.46 | 1.15 |
| 504.9630 | 57     | 13.33 | 13.53 | 14.90 | 14.92 | 0.58 |
| 505.0637 | 63.74  | 9.59  | 15.09 | 8.61  | 8.94  | 0.88 |
| 505.0746 | 19.72  | 14.83 | 12.78 | 13.31 | 14.59 | 0.64 |
| 505.1078 | 23.13  | 15.13 | 15.02 | 14.83 | 15.20 | 0.09 |
| 505.2570 | 165.25 | 18.88 | 17.72 | 17.99 | 17.92 | 1.37 |
| 505.2757 | 211.75 | 15.36 | 14.89 | 14.35 | 14.61 | 0.58 |
| 505.2985 | 205.49 | 14.81 | 13.87 | 13.70 | 13.98 | 0.93 |
| 505.3138 | 211.54 | 18.38 | 19.22 | 18.93 | 18.81 | 0.89 |
| 505.3363 | 209.55 | 15.94 | 16.51 | 16.30 | 15.92 | 0.23 |
| 505.3541 | 194.57 | 14.82 | 14.16 | 13.82 | 14.28 | 0.39 |
| 505.7842 | 58.76  | 15.83 | 14.46 | 16.84 | 16.54 | 0.19 |
| 505.8018 | 56.41  | 16.51 | 16.45 | 17.83 | 17.49 | 0.82 |
| 505.9597 | 55.34  | 14.16 | 16.36 | 17.10 | 16.23 | 1.63 |
| 506.0635 | 22.12  | 14.14 | 15.99 | 16.01 | 15.88 | 0.97 |
| 506.1261 | 22.96  | 16.91 | 18.10 | 17.84 | 17.52 | 0.88 |
| 506.2595 | 149.03 | 17.07 | 15.47 | 15.60 | 15.75 | 1.48 |
| 506.2894 | 205.2  | 16.51 | 17.37 | 17.50 | 16.73 | 0.83 |
| 506.3142 | 194.27 | 14.48 | 16.08 | 14.83 | 13.85 | 0.45 |
| 506.3257 | 207.89 | 19.09 | 14.72 | 15.20 | 15.02 | 2.07 |
| 506.3395 | 205.95 | 13.09 | 13.83 | 13.80 | 13.00 | 0.27 |
| 506.7391 | 80.44  | 13.46 | 12.16 | 13.97 | 13.29 | 0.33 |
| 506.7789 | 58.98  | 16.96 | 16.54 | 17.97 | 17.60 | 0.38 |
| 506.7959 | 54.53  | 19.56 | 19.55 | 20.46 | 20.33 | 0.77 |
| 506.8112 | 41.11  | 18.36 | 19.12 | 19.36 | 19.34 | 1.22 |
| 506.8316 | 47.97  | 12.86 | 8.32  | 12.44 | 12.49 | 0.57 |
| 506.8742 | 40.61  | 19.65 | 21.83 | 21.47 | 21.48 | 1.62 |
| 507.0182 | 17.27  | 10.85 | 11.77 | 13.27 | 12.94 | 0.67 |
| 507.2734 | 160.59 | 23.88 | 23.58 | 24.03 | 23.74 | 0.19 |
| 507.3158 | 194.41 | 15.76 | 16.23 | 15.78 | 15.57 | 0.12 |
| 507.3296 | 214.56 | 16.45 | 12.07 | 12.20 | 13.10 | 2.11 |

|          |        |       |       |       |       |      |
|----------|--------|-------|-------|-------|-------|------|
| 507.4423 | 225.57 | 19.15 | 17.19 | 17.11 | 17.55 | 1.29 |
| 507.7993 | 58.25  | 14.55 | 13.36 | 15.77 | 15.52 | 0.01 |
| 507.8777 | 40.72  | 15.37 | 17.85 | 17.47 | 17.41 | 1.58 |
| 507.9686 | 27.37  | 10.42 | 15.88 | 16.16 | 15.31 | 2.02 |
| 508.0431 | 23.69  | 13.50 | 13.38 | 12.94 | 13.24 | 0.13 |
| 508.1307 | 22.98  | 13.60 | 14.36 | 13.10 | 13.33 | 0.09 |
| 508.2761 | 152.24 | 21.94 | 21.62 | 22.10 | 21.80 | 0.20 |
| 508.3052 | 180.72 | 14.15 | 15.48 | 15.66 | 14.74 | 0.84 |
| 508.3270 | 199.48 | 16.36 | 17.35 | 16.49 | 16.06 | 0.48 |
| 508.3414 | 235.36 | 18.34 | 20.20 | 19.75 | 20.36 | 1.02 |
| 508.4459 | 225.67 | 17.15 | 13.87 | 13.75 | 14.90 | 1.35 |
| 508.7277 | 65.84  | 15.90 | 13.40 | 16.34 | 16.34 | 0.72 |
| 508.7405 | 74.49  | 13.30 | 10.25 | 13.28 | 12.63 | 0.87 |
| 508.7919 | 60.17  | 16.82 | 15.79 | 17.01 | 16.71 | 0.60 |
| 508.8119 | 50.89  | 18.44 | 17.40 | 17.85 | 18.14 | 0.80 |
| 508.8319 | 58.3   | 14.97 | 11.71 | 15.53 | 15.19 | 0.65 |
| 508.8707 | 43.01  | 16.94 | 17.80 | 17.29 | 17.47 | 0.69 |
| 508.8897 | 35.18  | 17.17 | 19.76 | 19.42 | 19.34 | 1.64 |
| 508.9503 | 60.94  | 12.34 | 10.72 | 14.65 | 14.50 | 0.16 |
| 508.9735 | 72.64  | 13.21 | 15.31 | 11.14 | 11.81 | 0.03 |
| 508.9877 | 19.46  | 12.29 | 15.68 | 15.90 | 15.30 | 1.40 |
| 509.0514 | 22.03  | 14.40 | 15.70 | 14.99 | 15.73 | 0.70 |
| 509.1332 | 85.47  | 12.40 | 12.56 | 15.00 | 14.84 | 0.56 |
| 509.2710 | 163.3  | 10.45 | 12.16 | 12.09 | 11.58 | 0.53 |
| 509.2797 | 152.26 | 18.72 | 18.53 | 19.11 | 18.89 | 0.10 |
| 509.2890 | 165.8  | 24.07 | 23.34 | 23.67 | 23.41 | 1.09 |
| 509.3315 | 205.28 | 16.29 | 17.45 | 17.30 | 16.73 | 0.98 |
| 509.3447 | 211.17 | 16.46 | 18.20 | 16.44 | 18.62 | 0.71 |
| 509.8918 | 33.35  | 10.94 | 14.59 | 14.01 | 14.52 | 1.48 |
| 509.9080 | 35.97  | 14.39 | 12.25 | 12.98 | 12.91 | 0.66 |
| 509.9727 | 17.36  | 14.92 | 15.13 | 14.87 | 13.93 | 0.02 |
| 510.2366 | 208.88 | 14.53 | 14.28 | 13.87 | 14.43 | 0.31 |
| 510.2866 | 171.47 | 22.11 | 21.39 | 21.80 | 21.49 | 0.97 |
| 510.3345 | 199.23 | 13.87 | 14.38 | 14.39 | 14.47 | 0.45 |
| 510.3452 | 210.19 | 14.72 | 16.80 | 14.92 | 15.73 | 0.86 |
| 510.7255 | 66.43  | 14.59 | 11.66 | 15.28 | 15.28 | 0.56 |
| 510.7489 | 75.8   | 17.63 | 18.11 | 18.39 | 17.63 | 0.78 |
| 510.8086 | 72.06  | 16.10 | 14.53 | 14.51 | 14.64 | 1.46 |
| 510.8285 | 44.48  | 19.88 | 20.75 | 20.06 | 20.33 | 0.90 |
| 510.8616 | 35.64  | 14.01 | 12.37 | 13.82 | 13.20 | 0.58 |
| 510.8853 | 41.02  | 15.13 | 18.57 | 18.53 | 18.58 | 1.66 |
| 510.9229 | 26.75  | 14.74 | 15.52 | 15.29 | 16.05 | 0.61 |
| 511.0036 | 17.14  | 13.22 | 15.23 | 14.91 | 13.50 | 1.10 |
| 511.1512 | 72.76  | 8.61  | 8.31  | 11.74 | 12.31 | 0.63 |
| 511.1948 | 65.24  | 19.61 | 21.18 | 19.17 | 19.22 | 0.66 |
| 511.2915 | 167.53 | 19.24 | 18.35 | 18.90 | 18.61 | 0.98 |
| 511.3052 | 186.8  | 22.00 | 21.67 | 22.04 | 21.32 | 0.35 |
| 511.3469 | 196.19 | 14.80 | 14.98 | 14.73 | 14.55 | 0.03 |
| 511.4739 | 258.49 | 23.07 | 22.69 | 22.59 | 22.29 | 0.73 |
| 511.8305 | 49.45  | 14.89 | 15.61 | 14.90 | 14.90 | 0.32 |
| 511.8666 | 38.28  | 16.84 | 16.55 | 17.21 | 16.18 | 0.05 |
| 512.0295 | 26.7   | 11.87 | 14.78 | 14.68 | 13.75 | 1.45 |
| 512.1986 | 57.41  | 17.33 | 18.91 | 16.79 | 16.88 | 0.60 |
| 512.2999 | 195.92 | 22.76 | 22.28 | 22.30 | 22.11 | 0.92 |
| 512.3074 | 180.08 | 17.72 | 19.46 | 19.99 | 18.87 | 1.40 |
| 512.3209 | 192.52 | 12.63 | 16.96 | 16.86 | 15.73 | 2.18 |
| 512.4773 | 263.7  | 21.48 | 21.05 | 20.97 | 20.70 | 0.77 |
| 512.7458 | 76.13  | 15.79 | 15.16 | 15.35 | 15.37 | 0.75 |
| 512.7644 | 63.12  | 18.22 | 17.90 | 18.14 | 18.13 | 0.34 |
| 512.8227 | 41.68  | 18.03 | 18.54 | 18.82 | 18.23 | 0.98 |
| 512.8805 | 41.07  | 15.52 | 16.02 | 16.02 | 16.32 | 0.57 |
| 512.9027 | 41.58  | 18.06 | 18.16 | 18.41 | 18.44 | 0.22 |

|          |        |       |       |       |       |      |
|----------|--------|-------|-------|-------|-------|------|
| 512.9231 | 39.3   | 15.11 | 17.31 | 17.60 | 17.26 | 1.69 |
| 513.0064 | 54.05  | 13.99 | 18.81 | 10.94 | 11.59 | 0.29 |
| 513.0476 | 60.75  | 13.83 | 17.30 | 12.10 | 12.67 | 0.46 |
| 513.1945 | 66.69  | 14.00 | 14.88 | 12.19 | 12.86 | 0.38 |
| 513.3032 | 289.05 | 17.81 | 17.83 | 17.70 | 18.50 | 0.07 |
| 513.3032 | 196.48 | 20.68 | 20.07 | 20.10 | 19.94 | 0.99 |
| 513.3111 | 184.08 | 14.87 | 16.02 | 16.42 | 15.69 | 0.65 |
| 513.3243 | 194.02 | 13.27 | 15.40 | 15.25 | 14.40 | 1.15 |
| 513.4798 | 258.65 | 18.84 | 18.17 | 18.05 | 17.83 | 0.96 |
| 513.8140 | 63.86  | 13.30 | 11.37 | 13.41 | 13.11 | 0.59 |
| 513.8663 | 38.98  | 14.68 | 13.12 | 13.25 | 13.02 | 0.85 |
| 513.8979 | 36.78  | 13.03 | 14.15 | 14.90 | 14.16 | 0.73 |
| 514.0855 | 19.9   | 13.58 | 16.09 | 15.06 | 14.56 | 0.72 |
| 514.2555 | 165.99 | 12.20 | 11.96 | 13.93 | 11.89 | 0.26 |
| 514.2857 | 23.85  | 21.49 | 21.93 | 20.01 | 21.38 | 0.14 |
| 514.3058 | 196.61 | 17.91 | 16.45 | 17.02 | 16.77 | 0.85 |
| 514.3755 | 188.17 | 13.14 | 14.93 | 14.97 | 14.34 | 1.24 |
| 514.6739 | 20.99  | 12.78 | 16.09 | 16.02 | 14.27 | 1.81 |
| 514.7025 | 82.72  | 9.07  | 11.16 | 11.48 | 9.57  | 0.77 |
| 514.7623 | 66.26  | 15.91 | 15.56 | 16.55 | 15.96 | 0.13 |
| 514.8168 | 38     | 15.34 | 15.89 | 16.63 | 15.55 | 0.80 |
| 514.8400 | 145.53 | 14.05 | 7.13  | 6.78  | 9.85  | 1.82 |
| 514.8617 | 41.06  | 20.24 | 21.13 | 21.42 | 21.36 | 1.50 |
| 514.9616 | 54.23  | 11.98 | 21.16 | 12.73 | 13.64 | 1.28 |
| 514.9834 | 30.85  | 11.83 | 18.06 | 16.36 | 15.35 | 2.04 |
| 515.0567 | 22.54  | 13.92 | 17.56 | 17.17 | 16.09 | 1.66 |
| 515.0696 | 18.58  | 11.66 | 13.22 | 14.95 | 12.95 | 0.79 |
| 515.2903 | 25.5   | 19.42 | 19.73 | 17.40 | 19.12 | 0.23 |
| 515.3030 | 194.12 | 15.15 | 14.32 | 15.01 | 15.92 | 0.14 |
| 515.6807 | 19.17  | 9.77  | 13.63 | 13.93 | 12.49 | 1.84 |
| 515.8644 | 49.19  | 16.14 | 17.01 | 17.40 | 17.30 | 1.38 |
| 515.9670 | 63.17  | 13.83 | 16.60 | 12.02 | 12.67 | 0.31 |
| 515.9812 | 26.99  | 17.57 | 18.54 | 17.57 | 17.47 | 0.53 |
| 516.0555 | 18.07  | 12.41 | 16.39 | 15.19 | 15.37 | 1.29 |
| 516.1261 | 20.72  | 14.59 | 13.67 | 13.26 | 14.97 | 0.36 |
| 516.2590 | 172.21 | 8.70  | 12.75 | 10.41 | 9.59  | 1.21 |
| 516.2749 | 175.85 | 14.61 | 15.91 | 16.30 | 15.76 | 0.91 |
| 516.7771 | 148.77 | 14.26 | 12.74 | 13.51 | 13.89 | 0.48 |
| 516.7980 | 57.75  | 19.45 | 18.76 | 19.88 | 19.71 | 0.25 |
| 516.8194 | 45.88  | 21.26 | 22.57 | 23.04 | 22.82 | 1.83 |
| 516.8373 | 47.01  | 16.40 | 17.09 | 16.90 | 17.05 | 0.97 |
| 516.8578 | 47.45  | 18.19 | 18.87 | 19.06 | 19.15 | 1.39 |
| 516.9641 | 63.34  | 14.80 | 18.43 | 13.47 | 13.88 | 0.63 |
| 516.9837 | 49.54  | 10.96 | 14.66 | 15.13 | 12.89 | 1.10 |
| 517.0396 | 18.19  | 13.67 | 15.90 | 16.44 | 15.91 | 1.08 |
| 517.2565 | 182.62 | 13.29 | 12.63 | 13.39 | 12.10 | 0.27 |
| 517.2773 | 166.38 | 11.50 | 12.22 | 12.59 | 12.21 | 0.42 |
| 517.3176 | 182.63 | 16.20 | 15.25 | 16.03 | 16.29 | 0.23 |
| 517.8018 | 62.34  | 14.73 | 11.40 | 14.10 | 14.04 | 1.28 |
| 517.8226 | 52.92  | 17.22 | 18.61 | 19.20 | 18.94 | 1.77 |
| 517.8957 | 35.41  | 16.08 | 16.98 | 16.81 | 16.29 | 0.91 |
| 517.9054 | 38.58  | 13.17 | 16.34 | 15.42 | 15.62 | 1.76 |
| 517.9656 | 58.58  | 12.09 | 14.04 | 10.61 | 10.09 | 0.07 |
| 517.9811 | 50.38  | 13.88 | 16.62 | 17.15 | 15.68 | 1.70 |
| 518.2508 | 176.84 | 17.39 | 16.44 | 16.30 | 16.27 | 1.17 |
| 518.2879 | 209.68 | 16.03 | 14.92 | 15.22 | 14.45 | 0.87 |
| 518.3211 | 183.14 | 14.51 | 13.23 | 13.77 | 14.32 | 0.44 |
| 518.7567 | 59.37  | 20.43 | 20.40 | 21.60 | 21.29 | 0.70 |
| 518.7771 | 55.59  | 16.11 | 14.50 | 17.37 | 17.05 | 0.15 |
| 518.7934 | 137.44 | 15.26 | 14.27 | 14.56 | 14.90 | 0.90 |
| 518.8178 | 43.46  | 19.87 | 20.72 | 21.31 | 21.12 | 1.67 |
| 518.9259 | 48.97  | 12.77 | 15.21 | 16.24 | 16.02 | 1.28 |

|          |        |       |       |       |       |      |
|----------|--------|-------|-------|-------|-------|------|
| 518.9677 | 145.26 | 7.81  | 7.49  | 7.71  | 12.50 | 0.16 |
| 519.0536 | 18.67  | 16.58 | 17.07 | 17.29 | 17.55 | 0.32 |
| 519.2542 | 167.42 | 14.50 | 12.63 | 12.71 | 12.91 | 1.38 |
| 519.2716 | 180.82 | 14.39 | 13.42 | 13.21 | 13.48 | 0.90 |
| 519.7601 | 60.27  | 15.86 | 14.41 | 17.31 | 16.93 | 0.01 |
| 519.8202 | 53.26  | 15.24 | 16.11 | 16.79 | 16.55 | 1.49 |
| 519.9166 | 46.33  | 15.62 | 16.99 | 17.57 | 17.12 | 1.52 |
| 520.0918 | 29.67  | 11.88 | 14.98 | 15.45 | 12.95 | 1.41 |
| 520.2456 | 220.04 | 15.79 | 16.46 | 15.73 | 16.12 | 0.32 |
| 520.2672 | 207.39 | 19.07 | 19.63 | 19.57 | 19.20 | 0.64 |
| 520.7332 | 89     | 13.20 | 12.15 | 12.32 | 12.19 | 0.61 |
| 520.7549 | 59.42  | 19.08 | 19.03 | 20.21 | 19.91 | 0.67 |
| 520.7722 | 53.67  | 19.12 | 19.24 | 20.40 | 20.10 | 0.83 |
| 520.7857 | 129.57 | 13.65 | 9.62  | 9.30  | 10.68 | 2.05 |
| 520.8134 | 54.13  | 17.21 | 16.95 | 17.89 | 17.76 | 0.34 |
| 520.8271 | 46.51  | 14.23 | 12.87 | 13.54 | 14.39 | 0.52 |
| 520.8656 | 35.48  | 14.43 | 15.33 | 15.47 | 15.20 | 0.68 |
| 520.8900 | 41.65  | 17.40 | 18.80 | 18.44 | 18.66 | 1.18 |
| 520.9109 | 41.24  | 15.96 | 18.82 | 18.62 | 18.64 | 1.51 |
| 520.9366 | 59.25  | 13.15 | 13.40 | 15.22 | 15.22 | 0.70 |
| 520.9941 | 68.35  | 13.42 | 15.41 | 11.37 | 12.16 | 0.01 |
| 521.0349 | 31.02  | 19.16 | 18.70 | 18.48 | 18.22 | 0.68 |
| 521.2295 | 163.9  | 14.93 | 15.44 | 15.76 | 14.80 | 0.57 |
| 521.2706 | 210.95 | 16.61 | 16.98 | 16.94 | 16.60 | 0.37 |
| 521.2716 | 152.51 | 18.63 | 16.35 | 17.22 | 17.30 | 1.50 |
| 521.2890 | 169.97 | 12.28 | 9.98  | 12.53 | 10.94 | 0.56 |
| 521.3118 | 186.08 | 14.49 | 14.32 | 14.87 | 11.82 | 0.13 |
| 521.7582 | 62.55  | 13.73 | 11.91 | 15.45 | 14.74 | 0.05 |
| 521.7756 | 60.03  | 14.18 | 12.63 | 15.73 | 15.40 | 0.01 |
| 521.9158 | 51.33  | 12.23 | 12.16 | 12.99 | 14.11 | 0.22 |
| 521.9338 | 58.52  | 13.69 | 15.56 | 16.95 | 16.17 | 1.45 |
| 521.9966 | 33.77  | 11.47 | 16.41 | 16.44 | 14.61 | 1.81 |
| 522.0564 | 24.11  | 12.24 | 17.45 | 17.52 | 16.32 | 2.08 |
| 522.0894 | 18.64  | 13.27 | 17.04 | 15.05 | 14.00 | 0.88 |
| 522.2614 | 192.94 | 16.11 | 16.01 | 16.34 | 15.50 | 0.04 |
| 522.2844 | 167.96 | 22.46 | 21.40 | 21.72 | 21.75 | 1.45 |
| 522.7527 | 60.5   | 15.98 | 14.06 | 17.16 | 16.78 | 0.24 |
| 522.7697 | 54.88  | 18.03 | 17.61 | 19.09 | 18.80 | 0.37 |
| 522.7853 | 48.69  | 18.33 | 17.79 | 18.43 | 18.70 | 0.25 |
| 522.8061 | 54.11  | 12.94 | 6.83  | 9.76  | 11.50 | 1.25 |
| 522.8065 | 149.79 | 11.77 | 4.22  | 4.82  | 7.06  | 1.79 |
| 522.8482 | 37.91  | 20.95 | 22.85 | 22.59 | 22.53 | 1.82 |
| 522.9057 | 41.97  | 15.16 | 16.56 | 16.40 | 16.68 | 1.13 |
| 523.0114 | 64.88  | 12.46 | 15.11 | 10.44 | 11.19 | 0.20 |
| 523.0307 | 25.33  | 15.99 | 13.84 | 13.30 | 13.19 | 1.14 |
| 523.0526 | 17.75  | 12.72 | 14.93 | 15.24 | 16.70 | 0.97 |
| 523.2867 | 168.15 | 20.50 | 19.32 | 19.68 | 19.70 | 1.52 |
| 523.3318 | 255.38 | 21.93 | 21.67 | 21.69 | 21.30 | 0.39 |
| 523.8518 | 43.69  | 16.68 | 19.01 | 18.81 | 18.68 | 1.82 |
| 523.9430 | 28.91  | 11.32 | 11.64 | 12.84 | 12.01 | 0.35 |
| 524.0560 | 18.25  | 14.25 | 16.42 | 16.72 | 17.17 | 1.09 |
| 524.0782 | 21.22  | 11.44 | 13.51 | 12.74 | 11.16 | 0.63 |
| 524.1773 | 25.11  | 15.51 | 14.35 | 15.71 | 14.91 | 0.28 |
| 524.2422 | 290.14 | 15.94 | 15.71 | 15.41 | 15.80 | 0.18 |
| 524.2789 | 194.46 | 23.72 | 23.63 | 24.02 | 23.43 | 0.06 |
| 524.3000 | 173.81 | 23.79 | 23.08 | 23.27 | 23.23 | 0.62 |
| 524.3348 | 247.13 | 19.82 | 19.55 | 19.40 | 19.20 | 0.38 |
| 524.7665 | 70.43  | 15.94 | 14.52 | 15.49 | 15.43 | 1.10 |
| 524.7853 | 51.71  | 18.84 | 18.41 | 18.62 | 18.78 | 0.35 |
| 524.8233 | 143.76 | 13.81 | 9.28  | 8.29  | 11.05 | 1.54 |
| 524.8457 | 44.27  | 18.33 | 19.85 | 19.63 | 19.62 | 1.70 |
| 524.8640 | 44.08  | 18.16 | 20.50 | 20.29 | 20.21 | 1.83 |



|          |        |       |       |       |       |      |
|----------|--------|-------|-------|-------|-------|------|
| 524.8995 | 40     | 14.08 | 15.48 | 15.21 | 15.87 | 0.92 |
| 524.9458 | 70.89  | 13.68 | 16.21 | 11.68 | 12.36 | 0.17 |
| 525.0536 | 19.44  | 13.17 | 14.20 | 13.10 | 13.91 | 0.28 |
| 525.1074 | 84.9   | 10.54 | 11.43 | 14.30 | 14.19 | 0.95 |
| 525.2822 | 193.64 | 21.93 | 21.83 | 22.23 | 21.65 | 0.05 |
| 525.3034 | 179.08 | 21.80 | 21.08 | 21.30 | 21.27 | 0.61 |
| 525.3305 | 265.05 | 15.74 | 16.03 | 15.61 | 15.84 | 0.09 |
| 525.8655 | 42.58  | 13.49 | 16.18 | 15.65 | 15.71 | 1.26 |
| 526.2574 | 192.35 | 14.40 | 16.12 | 15.91 | 14.59 | 1.30 |
| 526.2857 | 196.82 | 18.75 | 18.26 | 18.83 | 18.31 | 0.36 |
| 526.2948 | 199.93 | 21.45 | 22.04 | 22.26 | 21.17 | 0.78 |
| 526.3064 | 179.68 | 18.64 | 18.10 | 18.31 | 18.31 | 0.37 |
| 526.3157 | 210.69 | 21.14 | 20.81 | 20.68 | 20.55 | 0.66 |
| 526.7231 | 68.26  | 16.89 | 17.39 | 18.04 | 17.47 | 0.93 |
| 526.7438 | 93.33  | 12.54 | 13.21 | 14.36 | 13.46 | 0.70 |
| 526.7830 | 63.61  | 17.20 | 15.93 | 16.90 | 16.63 | 1.07 |
| 526.8014 | 55.22  | 20.33 | 20.58 | 20.26 | 20.41 | 0.21 |
| 526.8384 | 43.2   | 14.58 | 13.09 | 14.20 | 13.81 | 0.61 |
| 526.8595 | 43.59  | 17.31 | 19.63 | 19.67 | 19.63 | 1.90 |
| 526.8768 | 29.11  | 11.76 | 13.80 | 14.14 | 12.71 | 0.78 |
| 526.9184 | 46.86  | 15.87 | 14.07 | 14.81 | 14.02 | 0.54 |
| 526.9394 | 33.67  | 10.75 | 12.56 | 13.52 | 12.44 | 0.86 |
| 527.1691 | 57.42  | 15.99 | 20.60 | 15.09 | 15.34 | 0.86 |
| 527.2394 | 187.69 | 14.69 | 12.92 | 11.50 | 13.57 | 1.07 |
| 527.2614 | 192.95 | 9.75  | 13.10 | 12.55 | 10.16 | 1.25 |
| 527.2876 | 193.85 | 15.67 | 14.78 | 15.40 | 15.02 | 0.85 |
| 527.2980 | 199.47 | 19.64 | 20.18 | 20.41 | 19.38 | 0.74 |
| 527.3085 | 173.8  | 15.59 | 14.42 | 14.66 | 14.88 | 0.76 |
| 527.3194 | 211.3  | 19.16 | 18.18 | 17.71 | 18.49 | 1.23 |
| 527.3555 | 191.5  | 15.51 | 18.86 | 18.97 | 18.12 | 1.95 |
| 527.8045 | 59.11  | 15.50 | 14.55 | 15.53 | 15.31 | 0.50 |
| 527.8411 | 34.63  | 15.48 | 13.45 | 13.48 | 13.30 | 0.99 |
| 527.8659 | 39.58  | 11.46 | 13.06 | 12.78 | 13.56 | 1.03 |
| 527.9418 | 31.27  | 11.06 | 12.20 | 14.16 | 10.79 | 0.95 |
| 528.1078 | 24.87  | 17.73 | 17.34 | 17.56 | 17.06 | 0.41 |
| 528.1732 | 57.63  | 15.61 | 17.48 | 14.68 | 14.95 | 0.43 |
| 528.2732 | 202.68 | 19.15 | 21.07 | 20.92 | 19.89 | 1.63 |
| 528.2934 | 201.37 | 19.11 | 18.43 | 18.61 | 18.60 | 1.02 |
| 528.3103 | 210.62 | 21.12 | 21.84 | 21.95 | 21.18 | 0.99 |
| 528.3229 | 196.9  | 14.54 | 9.05  | 9.55  | 10.59 | 1.84 |
| 528.3579 | 190.2  | 12.93 | 14.99 | 14.95 | 14.23 | 1.25 |
| 528.7214 | 70.47  | 14.89 | 15.89 | 15.88 | 15.44 | 0.99 |
| 528.7388 | 71.93  | 17.07 | 17.76 | 17.77 | 17.63 | 0.95 |
| 528.7966 | 40.05  | 18.60 | 18.51 | 18.95 | 18.63 | 0.17 |
| 528.8549 | 139.04 | 12.54 | 5.33  | 5.00  | 6.86  | 1.97 |
| 528.8549 | 36.41  | 15.29 | 15.88 | 16.25 | 16.44 | 0.75 |
| 528.8769 | 38.93  | 18.51 | 18.49 | 18.54 | 18.84 | 0.04 |
| 528.8974 | 42.82  | 16.30 | 18.00 | 18.19 | 18.03 | 1.63 |
| 528.9832 | 65.12  | 14.42 | 16.59 | 12.88 | 13.38 | 0.25 |
| 529.0232 | 60.66  | 13.34 | 20.63 | 11.48 | 12.00 | 0.78 |
| 529.1678 | 65.91  | 13.90 | 14.68 | 12.06 | 12.70 | 0.45 |
| 529.2700 | 291.55 | 15.00 | 15.08 | 15.55 | 15.89 | 0.25 |
| 529.2962 | 192.08 | 17.05 | 16.53 | 17.18 | 16.66 | 0.25 |
| 529.3138 | 210.6  | 19.32 | 20.00 | 20.09 | 19.14 | 0.81 |
| 529.4245 | 227.08 | 15.79 | 11.35 | 10.71 | 13.11 | 1.54 |
| 529.7199 | 16.74  | 11.01 | 12.37 | 12.81 | 11.06 | 0.64 |
| 529.8721 | 37.64  | 14.05 | 14.08 | 14.11 | 14.49 | 0.09 |
| 530.0271 | 61.28  | 13.44 | 17.11 | 11.51 | 12.20 | 0.44 |
| 530.0673 | 22.17  | 12.91 | 13.60 | 14.43 | 14.69 | 0.49 |
| 530.1067 | 24.62  | 12.12 | 14.20 | 14.70 | 13.44 | 1.01 |
| 530.2835 | 206.08 | 16.92 | 16.74 | 16.49 | 16.27 | 0.40 |
| 530.3027 | 240.54 | 22.77 | 18.58 | 17.60 | 19.06 | 2.10 |

|          |        |       |       |       |       |      |
|----------|--------|-------|-------|-------|-------|------|
| 530.3180 | 213.01 | 16.09 | 16.94 | 17.11 | 15.95 | 0.65 |
| 530.7355 | 75     | 15.70 | 15.68 | 16.14 | 15.74 | 0.28 |
| 530.7691 | 69.66  | 8.28  | 7.64  | 13.05 | 12.69 | 0.57 |
| 530.7919 | 39.92  | 16.24 | 16.16 | 16.79 | 16.02 | 0.19 |
| 530.8135 | 62.96  | 17.42 | 16.62 | 17.70 | 17.67 | 0.41 |
| 530.8142 | 138.4  | 14.70 | 10.55 | 9.83  | 12.63 | 1.63 |
| 530.8351 | 52.66  | 19.98 | 20.38 | 20.97 | 20.88 | 1.19 |
| 530.8741 | 49.84  | 15.76 | 13.98 | 14.54 | 15.20 | 0.76 |
| 530.9328 | 59.54  | 12.26 | 11.39 | 13.74 | 14.48 | 0.17 |
| 530.9605 | 57     | 12.08 | 18.59 | 10.08 | 10.69 | 0.71 |
| 530.9776 | 67.92  | 13.02 | 14.13 | 10.85 | 11.53 | 0.35 |
| 531.0209 | 61.37  | 9.50  | 16.97 | 8.70  | 9.70  | 1.03 |
| 531.2732 | 156.36 | 22.52 | 22.18 | 22.43 | 22.05 | 0.37 |
| 531.3063 | 248.12 | 20.64 | 14.70 | 13.63 | 15.84 | 2.04 |
| 531.8382 | 52.46  | 15.87 | 16.00 | 16.64 | 16.62 | 0.68 |
| 531.9327 | 33.4   | 12.52 | 14.54 | 14.31 | 13.82 | 0.92 |
| 531.9533 | 26.11  | 15.43 | 11.59 | 12.21 | 14.01 | 0.99 |
| 531.9636 | 72.67  | 8.26  | 14.22 | 11.28 | 10.22 | 1.57 |
| 531.9833 | 24.98  | 10.24 | 14.89 | 15.30 | 14.19 | 1.98 |
| 532.2768 | 154.52 | 20.61 | 20.19 | 20.47 | 20.10 | 0.45 |
| 532.3000 | 244.02 | 20.89 | 15.27 | 13.61 | 16.15 | 2.08 |
| 532.7487 | 74.88  | 15.78 | 13.28 | 14.92 | 14.98 | 1.48 |
| 532.7728 | 62.62  | 17.74 | 16.62 | 18.16 | 18.17 | 0.38 |
| 532.7934 | 46.87  | 20.60 | 21.33 | 22.12 | 21.86 | 1.47 |
| 532.8126 | 46.64  | 17.16 | 17.37 | 18.12 | 17.94 | 1.14 |
| 532.8320 | 53.69  | 18.30 | 18.61 | 19.04 | 19.05 | 1.01 |
| 532.9582 | 57.07  | 11.24 | 16.49 | 15.54 | 14.12 | 1.64 |
| 533.1070 | 17.73  | 14.27 | 17.53 | 16.38 | 15.56 | 1.19 |
| 533.2857 | 167.11 | 20.23 | 19.64 | 19.96 | 19.61 | 0.73 |
| 533.3037 | 239.53 | 18.31 | 13.07 | 11.31 | 13.98 | 1.98 |
| 533.4564 | 262.65 | 19.33 | 18.39 | 18.50 | 18.90 | 1.35 |
| 533.7968 | 55.21  | 16.49 | 17.20 | 18.15 | 17.88 | 1.34 |
| 533.8754 | 38.1   | 16.80 | 17.86 | 17.90 | 17.26 | 1.32 |
| 533.9551 | 53.31  | 13.71 | 16.52 | 17.37 | 16.18 | 1.69 |
| 534.2246 | 176.33 | 14.15 | 14.00 | 14.71 | 13.39 | 0.03 |
| 534.2872 | 179.84 | 18.92 | 18.39 | 18.72 | 18.30 | 0.67 |
| 534.3443 | 203.93 | 13.17 | 15.05 | 14.13 | 13.20 | 0.55 |
| 534.4594 | 257.5  | 17.10 | 16.06 | 16.17 | 16.71 | 1.15 |
| 534.7517 | 58.01  | 15.11 | 13.78 | 16.97 | 16.46 | 0.15 |
| 534.7699 | 62.32  | 16.82 | 14.30 | 16.21 | 16.56 | 1.36 |
| 534.7919 | 53.68  | 19.23 | 19.76 | 20.58 | 20.36 | 1.33 |
| 534.8169 | 49.55  | 15.18 | 14.10 | 15.76 | 15.51 | 0.23 |
| 534.8597 | 35.21  | 12.05 | 12.89 | 14.05 | 12.41 | 0.63 |
| 534.9032 | 39.52  | 14.97 | 17.38 | 17.48 | 17.32 | 1.56 |
| 534.9267 | 40.67  | 15.00 | 17.06 | 16.74 | 17.07 | 1.07 |
| 534.9441 | 17.57  | 12.24 | 15.34 | 15.13 | 14.46 | 1.58 |
| 535.2904 | 172.54 | 16.07 | 14.11 | 15.06 | 14.77 | 1.26 |
| 535.3050 | 170.76 | 18.16 | 17.38 | 17.87 | 17.34 | 0.81 |
| 535.4741 | 256.68 | 19.00 | 18.93 | 18.88 | 19.36 | 0.05 |
| 535.7947 | 56.08  | 14.32 | 14.76 | 15.97 | 15.72 | 0.92 |
| 535.8914 | 43.36  | 16.21 | 16.99 | 17.14 | 16.65 | 0.84 |
| 536.2404 | 207.53 | 17.32 | 18.65 | 18.76 | 18.01 | 1.39 |
| 536.3000 | 187.7  | 19.55 | 19.12 | 19.83 | 19.19 | 0.22 |
| 536.3093 | 170.69 | 14.58 | 14.22 | 14.84 | 14.32 | 0.09 |
| 536.4771 | 256.6  | 16.59 | 16.90 | 16.85 | 17.40 | 0.39 |
| 536.7490 | 63.85  | 14.16 | 11.73 | 15.35 | 14.80 | 0.39 |
| 536.7882 | 54.54  | 16.33 | 16.14 | 17.31 | 17.01 | 0.52 |
| 536.8393 | 38.97  | 14.37 | 15.33 | 15.88 | 14.22 | 0.50 |
| 536.8645 | 38.68  | 18.50 | 19.70 | 19.49 | 19.60 | 1.37 |
| 536.8850 | 44.26  | 18.30 | 21.11 | 20.99 | 20.91 | 1.69 |
| 536.9661 | 46.36  | 12.43 | 18.23 | 13.14 | 13.31 | 1.26 |
| 537.0391 | 24.26  | 11.38 | 15.20 | 15.32 | 13.70 | 1.75 |

|          |        |       |       |       |       |      |
|----------|--------|-------|-------|-------|-------|------|
| 537.2430 | 208.87 | 13.99 | 15.95 | 16.02 | 14.85 | 1.15 |
| 537.3028 | 187.9  | 17.29 | 16.71 | 17.24 | 16.79 | 0.36 |
| 537.3205 | 184.29 | 16.80 | 15.85 | 16.44 | 15.99 | 0.93 |
| 537.3324 | 241.58 | 19.63 | 10.24 | 8.46  | 11.40 | 2.12 |
| 537.3474 | 252.59 | 21.46 | 20.52 | 20.33 | 20.34 | 1.26 |
| 537.4896 | 263.24 | 23.18 | 23.14 | 23.13 | 23.12 | 0.09 |
| 537.8700 | 33.81  | 13.30 | 13.02 | 12.38 | 13.52 | 0.25 |
| 537.8874 | 43.51  | 15.15 | 17.08 | 16.88 | 16.99 | 1.49 |
| 537.9038 | 48.87  | 13.23 | 12.61 | 14.70 | 14.84 | 0.30 |
| 537.9648 | 29.99  | 17.19 | 18.52 | 18.64 | 18.03 | 1.77 |
| 538.0844 | 17.11  | 9.49  | 15.26 | 13.82 | 12.43 | 1.46 |
| 538.3158 | 206.84 | 25.06 | 24.90 | 24.97 | 24.83 | 0.31 |
| 538.3503 | 270.15 | 19.79 | 19.49 | 19.55 | 19.08 | 0.30 |
| 538.4930 | 268.74 | 21.67 | 21.65 | 21.66 | 21.63 | 0.04 |
| 538.7584 | 48.38  | 17.83 | 15.81 | 17.94 | 18.32 | 0.69 |
| 538.7805 | 64.65  | 13.37 | 8.05  | 8.60  | 9.73  | 1.89 |
| 538.8014 | 63.8   | 16.62 | 12.54 | 15.47 | 15.50 | 1.37 |
| 538.8224 | 40.42  | 21.60 | 23.19 | 23.07 | 22.99 | 1.83 |
| 538.8626 | 43.9   | 15.65 | 13.03 | 13.66 | 15.39 | 1.11 |
| 538.8807 | 44.34  | 16.18 | 17.84 | 17.84 | 18.04 | 1.57 |
| 538.9670 | 70.73  | 10.90 | 13.82 | 9.42  | 10.15 | 0.34 |
| 538.9848 | 55.51  | 11.82 | 18.06 | 9.84  | 10.49 | 0.69 |
| 539.0675 | 18.13  | 10.27 | 14.67 | 16.47 | 14.75 | 1.56 |
| 539.1398 | 20.14  | 12.77 | 17.07 | 16.80 | 14.72 | 1.43 |
| 539.3191 | 204.39 | 23.21 | 22.95 | 22.98 | 22.88 | 0.53 |
| 539.3467 | 279.02 | 16.75 | 16.60 | 16.83 | 16.80 | 0.05 |
| 539.4997 | 277.88 | 19.00 | 19.03 | 19.07 | 19.15 | 0.07 |
| 539.8259 | 47.05  | 17.78 | 19.37 | 19.31 | 19.16 | 2.01 |
| 540.0708 | 20.82  | 9.82  | 11.61 | 12.08 | 11.29 | 0.87 |
| 540.2729 | 166.58 | 15.70 | 16.28 | 16.70 | 16.30 | 0.66 |
| 540.3315 | 236.08 | 27.42 | 23.61 | 22.80 | 23.46 | 2.08 |
| 540.3674 | 204.14 | 14.44 | 16.64 | 17.41 | 15.47 | 1.59 |
| 540.5085 | 296.58 | 12.59 | 13.11 | 12.88 | 15.15 | 0.30 |
| 540.7384 | 83.95  | 14.23 | 13.55 | 13.61 | 13.81 | 0.50 |
| 540.7593 | 64.49  | 19.31 | 19.38 | 19.94 | 19.85 | 0.74 |
| 540.7974 | 148.16 | 14.27 | 10.32 | 9.55  | 11.70 | 1.25 |
| 540.8207 | 39.37  | 19.31 | 20.80 | 20.76 | 20.60 | 1.88 |
| 540.8378 | 46.16  | 18.57 | 20.46 | 20.39 | 20.25 | 2.00 |
| 540.8746 | 43.31  | 15.65 | 16.81 | 17.04 | 17.21 | 1.38 |
| 540.9361 | 29.11  | 13.89 | 12.99 | 12.98 | 13.56 | 0.34 |
| 541.2268 | 54.55  | 7.89  | 21.83 | 7.32  | 7.49  | 1.14 |
| 541.2319 | 171.19 | 14.99 | 12.64 | 14.10 | 14.29 | 0.94 |
| 541.2775 | 166.38 | 12.15 | 12.57 | 13.41 | 12.79 | 0.43 |
| 541.3227 | 201.47 | 14.98 | 14.69 | 13.59 | 14.95 | 0.38 |
| 541.3349 | 240.7  | 25.39 | 21.02 | 20.33 | 21.33 | 2.11 |
| 541.3692 | 264.98 | 11.00 | 14.09 | 14.70 | 13.04 | 1.07 |
| 541.7629 | 69.61  | 14.54 | 10.61 | 14.73 | 13.94 | 1.09 |
| 541.8238 | 47.53  | 14.59 | 16.40 | 16.14 | 16.16 | 1.73 |
| 541.8401 | 45.2   | 13.62 | 16.45 | 16.07 | 16.11 | 1.78 |
| 542.0111 | 18.06  | 11.20 | 16.71 | 14.52 | 14.31 | 1.65 |
| 542.2300 | 62.67  | 16.12 | 19.64 | 15.37 | 15.57 | 0.84 |
| 542.2510 | 131.37 | 16.74 | 13.08 | 14.05 | 14.75 | 1.74 |
| 542.2895 | 175.23 | 11.30 | 12.86 | 13.95 | 11.86 | 0.88 |
| 542.3110 | 174.01 | 11.35 | 12.51 | 12.50 | 12.15 | 0.80 |
| 542.3375 | 241.52 | 23.05 | 18.31 | 17.41 | 18.10 | 2.08 |
| 542.6972 | 81.15  | 14.30 | 14.98 | 15.36 | 14.83 | 0.72 |
| 542.7183 | 91.03  | 13.47 | 13.77 | 14.31 | 13.76 | 0.42 |
| 542.7579 | 60.21  | 17.40 | 17.00 | 17.79 | 17.70 | 0.02 |
| 542.7753 | 52.37  | 20.37 | 20.27 | 21.11 | 20.82 | 0.59 |
| 542.8171 | 49.82  | 15.83 | 15.63 | 15.24 | 15.08 | 0.60 |
| 542.8342 | 39.54  | 18.04 | 19.86 | 20.00 | 19.90 | 1.98 |
| 542.8508 | 35.37  | 15.20 | 16.72 | 16.94 | 16.90 | 1.44 |

|          |        |       |       |       |       |      |
|----------|--------|-------|-------|-------|-------|------|
| 542.8926 | 44.07  | 16.57 | 14.82 | 14.67 | 15.52 | 0.73 |
| 542.9132 | 39.76  | 13.46 | 13.65 | 13.27 | 13.81 | 0.04 |
| 542.9946 | 17.86  | 11.83 | 15.83 | 15.84 | 15.20 | 1.68 |
| 543.0167 | 28.59  | 18.07 | 17.09 | 17.00 | 16.65 | 0.87 |
| 543.0376 | 46.58  | 13.83 | 16.60 | 12.00 | 12.65 | 0.30 |
| 543.2291 | 164.53 | 9.40  | 10.29 | 9.19  | 8.57  | 0.10 |
| 543.2319 | 62.84  | 7.99  | 15.74 | 7.84  | 8.11  | 1.15 |
| 543.2739 | 161.91 | 14.89 | 12.76 | 14.10 | 12.38 | 0.89 |
| 543.2851 | 288.48 | 16.93 | 16.29 | 16.25 | 16.87 | 0.66 |
| 543.3204 | 183.44 | 11.21 | 13.44 | 14.11 | 11.48 | 0.91 |
| 543.3399 | 202.21 | 19.87 | 16.01 | 16.43 | 15.06 | 2.06 |
| 543.7788 | 61.18  | 15.73 | 14.17 | 16.41 | 16.13 | 0.45 |
| 543.8391 | 44.43  | 10.75 | 13.16 | 13.23 | 13.69 | 1.51 |
| 543.9154 | 31.4   | 11.30 | 11.57 | 13.23 | 11.08 | 0.51 |
| 543.9451 | 102.92 | 12.57 | 13.60 | 14.06 | 14.13 | 1.00 |
| 544.0387 | 28.16  | 11.56 | 14.99 | 15.11 | 13.45 | 1.91 |
| 544.1126 | 21.78  | 8.39  | 12.20 | 13.19 | 10.37 | 1.70 |
| 544.2681 | 160.24 | 21.92 | 21.63 | 21.87 | 21.59 | 0.19 |
| 544.3060 | 174.06 | 14.61 | 15.23 | 14.98 | 14.21 | 0.31 |
| 544.3428 | 222.23 | 15.59 | 10.39 | 11.15 | 10.74 | 1.92 |
| 544.6960 | 79.04  | 12.54 | 11.56 | 12.48 | 12.00 | 0.41 |
| 544.7132 | 66.81  | 14.26 | 13.99 | 15.75 | 14.64 | 0.35 |
| 544.7548 | 72.69  | 13.43 | 10.75 | 12.19 | 12.62 | 1.36 |
| 544.7717 | 45.98  | 18.92 | 18.37 | 19.33 | 18.95 | 0.19 |
| 544.8292 | 43.79  | 16.18 | 17.12 | 17.42 | 17.30 | 1.44 |
| 544.8511 | 39.44  | 18.48 | 18.46 | 18.29 | 18.73 | 0.07 |
| 544.8725 | 45.09  | 16.59 | 17.76 | 17.85 | 17.77 | 1.42 |
| 544.9668 | 150.9  | 14.77 | 15.44 | 15.79 | 15.18 | 0.95 |
| 544.9933 | 54.07  | 13.86 | 21.46 | 14.00 | 13.58 | 1.10 |
| 545.2293 | 151.69 | 13.42 | 14.17 | 15.15 | 14.07 | 0.73 |
| 545.2718 | 150.25 | 20.41 | 19.51 | 19.85 | 19.52 | 1.01 |
| 545.2891 | 164.67 | 12.88 | 10.54 | 11.11 | 10.14 | 0.95 |
| 545.3003 | 179.57 | 8.80  | 13.09 | 13.77 | 9.00  | 1.36 |
| 545.3117 | 167.96 | 12.94 | 13.07 | 12.67 | 11.85 | 0.09 |
| 545.8572 | 35.37  | 12.56 | 13.26 | 11.96 | 12.77 | 0.06 |
| 546.0008 | 61.43  | 13.00 | 18.55 | 10.96 | 11.65 | 0.64 |
| 546.2605 | 194.19 | 14.41 | 13.58 | 14.03 | 13.98 | 0.49 |
| 546.2832 | 187.02 | 21.42 | 20.46 | 20.66 | 20.83 | 1.28 |
| 546.3209 | 220.7  | 15.50 | 15.53 | 15.68 | 15.06 | 0.02 |
| 546.7066 | 74.97  | 14.22 | 11.82 | 14.14 | 14.23 | 0.84 |
| 546.7676 | 49.25  | 16.13 | 15.24 | 15.85 | 15.26 | 0.60 |
| 546.7876 | 66.14  | 16.22 | 12.13 | 15.60 | 15.95 | 1.16 |
| 546.8091 | 54.92  | 19.19 | 19.13 | 20.07 | 19.96 | 0.65 |
| 546.8290 | 55.51  | 14.84 | 12.72 | 13.89 | 14.40 | 1.15 |
| 546.8491 | 51.11  | 15.91 | 13.94 | 14.66 | 14.95 | 0.89 |
| 546.8672 | 39.53  | 17.17 | 19.67 | 19.19 | 19.23 | 1.48 |
| 546.9566 | 69.81  | 12.94 | 13.64 | 10.92 | 11.61 | 0.53 |
| 546.9944 | 61.15  | 10.55 | 17.92 | 10.32 | 10.60 | 1.11 |
| 547.2452 | 166.53 | 13.86 | 13.86 | 14.50 | 13.57 | 0.16 |
| 547.2868 | 177.09 | 19.37 | 18.21 | 18.59 | 18.65 | 1.28 |
| 547.4743 | 247.98 | 14.27 | 12.89 | 12.55 | 13.94 | 0.70 |
| 547.8122 | 55.7   | 14.93 | 13.82 | 15.38 | 15.36 | 0.33 |
| 547.9069 | 36.38  | 15.45 | 16.67 | 16.81 | 16.09 | 1.08 |
| 547.9993 | 61.63  | 13.60 | 14.68 | 11.73 | 12.41 | 0.31 |
| 548.2424 | 290.39 | 15.92 | 15.47 | 15.39 | 15.51 | 0.28 |
| 548.2946 | 165.14 | 18.16 | 16.65 | 17.12 | 17.18 | 1.53 |
| 548.7243 | 74.72  | 16.05 | 15.38 | 15.33 | 15.46 | 0.96 |
| 548.7675 | 55.24  | 18.98 | 19.28 | 20.35 | 20.11 | 0.93 |
| 548.7875 | 52.95  | 17.77 | 17.55 | 18.79 | 18.54 | 0.60 |
| 548.8068 | 53.11  | 18.05 | 17.69 | 18.53 | 18.44 | 0.12 |
| 548.9319 | 57.14  | 12.34 | 12.30 | 14.73 | 14.38 | 0.61 |
| 548.9925 | 30.91  | 11.88 | 13.86 | 13.29 | 11.46 | 0.84 |

|          |        |       |       |       |       |      |
|----------|--------|-------|-------|-------|-------|------|
| 549.0642 | 18.32  | 13.50 | 11.90 | 13.53 | 14.56 | 0.22 |
| 549.1520 | 67.44  | 12.67 | 13.85 | 10.60 | 11.27 | 0.30 |
| 549.1690 | 26.94  | 12.25 | 14.85 | 14.53 | 13.02 | 0.96 |
| 549.2666 | 203.48 | 13.52 | 13.98 | 14.62 | 13.99 | 0.44 |
| 549.3029 | 167.67 | 15.64 | 13.31 | 14.03 | 14.39 | 1.65 |
| 549.3439 | 189.06 | 16.25 | 16.71 | 16.10 | 14.31 | 0.04 |
| 549.4294 | 257.81 | 17.51 | 17.40 | 17.78 | 17.59 | 0.09 |
| 549.7708 | 57.51  | 14.24 | 13.73 | 16.04 | 15.76 | 0.39 |
| 549.8243 | 44.74  | 13.41 | 14.99 | 13.39 | 13.75 | 0.46 |
| 549.8487 | 39.3   | 16.15 | 17.19 | 17.26 | 16.41 | 0.71 |
| 549.9284 | 55.19  | 12.42 | 15.63 | 16.76 | 15.83 | 1.75 |
| 550.0276 | 19.44  | 11.90 | 16.15 | 16.28 | 15.50 | 1.66 |
| 550.0970 | 22.27  | 10.91 | 11.59 | 11.75 | 14.79 | 0.42 |
| 550.2566 | 209.05 | 13.95 | 15.43 | 15.38 | 14.00 | 0.60 |
| 550.3159 | 190.39 | 18.67 | 17.19 | 18.04 | 17.56 | 1.15 |
| 550.3501 | 188.64 | 14.64 | 15.52 | 16.00 | 13.99 | 0.52 |
| 550.4334 | 257.62 | 14.52 | 13.91 | 14.90 | 14.73 | 0.09 |
| 550.7216 | 75.62  | 13.78 | 11.55 | 12.40 | 12.49 | 1.02 |
| 550.7426 | 66.93  | 15.80 | 15.47 | 15.23 | 15.32 | 0.47 |
| 550.7663 | 54.24  | 17.76 | 17.79 | 19.04 | 18.77 | 0.77 |
| 550.7914 | 53.79  | 16.00 | 15.23 | 16.83 | 16.60 | 0.02 |
| 550.8326 | 34.8   | 12.57 | 15.23 | 14.69 | 14.99 | 1.38 |
| 550.8785 | 35.91  | 16.24 | 17.93 | 17.98 | 17.96 | 1.68 |
| 550.9008 | 38.51  | 17.31 | 19.57 | 19.56 | 19.57 | 1.51 |
| 551.0057 | 61.01  | 14.25 | 18.25 | 12.60 | 13.14 | 0.57 |
| 551.0382 | 18.01  | 12.15 | 14.18 | 12.43 | 12.48 | 0.81 |
| 551.1001 | 20.54  | 12.89 | 14.10 | 14.10 | 15.82 | 0.63 |
| 551.2612 | 163.81 | 19.76 | 19.15 | 19.43 | 19.16 | 0.80 |
| 551.3199 | 182.75 | 16.56 | 14.54 | 15.08 | 15.15 | 1.48 |
| 551.3297 | 258.3  | 14.64 | 14.07 | 13.58 | 14.53 | 0.36 |
| 551.3589 | 199.13 | 15.94 | 17.29 | 16.98 | 15.84 | 0.55 |
| 551.5048 | 277.25 | 16.29 | 14.93 | 15.02 | 16.97 | 0.57 |
| 551.7689 | 57.67  | 13.14 | 10.51 | 12.78 | 12.64 | 0.91 |
| 551.8572 | 38.61  | 15.34 | 15.77 | 16.16 | 14.93 | 0.26 |
| 551.8730 | 36.92  | 12.35 | 14.08 | 13.79 | 14.10 | 0.76 |
| 551.9041 | 38.16  | 12.04 | 13.30 | 12.98 | 13.79 | 0.73 |
| 551.9304 | 58.55  | 13.42 | 10.19 | 12.75 | 13.81 | 0.92 |
| 551.9527 | 62.99  | 15.39 | 11.41 | 15.37 | 15.75 | 0.99 |
| 552.0484 | 25.51  | 10.95 | 15.02 | 14.60 | 13.92 | 1.71 |
| 552.1287 | 19.66  | 14.03 | 12.49 | 11.71 | 11.57 | 0.71 |
| 552.2693 | 188.3  | 19.57 | 20.87 | 20.86 | 20.13 | 1.44 |
| 552.2741 | 292.64 | 16.25 | 13.75 | 13.60 | 14.29 | 0.89 |
| 552.3105 | 205.09 | 17.30 | 17.63 | 17.98 | 17.79 | 0.66 |
| 552.3315 | 216.82 | 22.91 | 22.58 | 22.73 | 22.31 | 0.51 |
| 552.3671 | 203.78 | 17.21 | 19.39 | 19.37 | 18.90 | 1.66 |
| 552.7637 | 54.19  | 15.07 | 12.67 | 15.69 | 14.79 | 0.55 |
| 552.8161 | 140.06 | 13.07 | 7.60  | 6.76  | 8.88  | 1.53 |
| 552.8391 | 39.93  | 19.34 | 19.85 | 19.80 | 19.87 | 1.08 |
| 552.8589 | 46.52  | 19.61 | 22.11 | 22.11 | 21.95 | 1.83 |
| 552.8957 | 16.95  | 13.79 | 15.52 | 15.38 | 14.04 | 0.90 |
| 552.9425 | 66.01  | 14.80 | 18.84 | 13.35 | 13.81 | 0.63 |
| 553.0493 | 17.89  | 10.95 | 14.71 | 13.36 | 13.09 | 1.28 |
| 553.2612 | 167.81 | 16.48 | 15.37 | 15.71 | 15.50 | 1.19 |
| 553.2774 | 200.67 | 17.21 | 18.87 | 18.97 | 18.10 | 1.57 |
| 553.3138 | 205.49 | 15.38 | 15.42 | 15.79 | 15.59 | 0.21 |
| 553.3349 | 203.43 | 21.05 | 20.63 | 20.77 | 20.41 | 0.66 |
| 553.3709 | 199.33 | 13.61 | 17.12 | 16.94 | 16.66 | 1.38 |
| 553.8451 | 43.14  | 15.56 | 15.14 | 14.60 | 15.35 | 0.61 |
| 553.8622 | 46.43  | 15.33 | 18.36 | 18.36 | 18.26 | 1.78 |
| 553.8737 | 34.12  | 12.36 | 13.54 | 13.55 | 13.79 | 0.83 |
| 553.9403 | 33.19  | 16.36 | 18.15 | 18.45 | 17.38 | 1.34 |
| 553.9650 | 26.26  | 9.40  | 13.11 | 13.88 | 12.53 | 1.76 |

|          |        |       |       |       |       |      |
|----------|--------|-------|-------|-------|-------|------|
| 554.1247 | 18.06  | 15.10 | 18.25 | 18.63 | 19.14 | 1.59 |
| 554.2854 | 199.9  | 16.92 | 19.48 | 19.46 | 18.03 | 1.69 |
| 554.3046 | 217.41 | 20.12 | 20.67 | 20.04 | 20.62 | 0.39 |
| 554.3287 | 216.16 | 14.02 | 15.17 | 15.06 | 14.51 | 0.62 |
| 554.3470 | 246.37 | 26.44 | 22.29 | 21.79 | 22.34 | 2.08 |
| 554.3580 | 58.13  | 18.95 | 21.40 | 18.52 | 18.57 | 0.87 |
| 554.3831 | 194.4  | 12.62 | 13.86 | 15.25 | 14.68 | 0.96 |
| 554.7324 | 59.41  | 16.01 | 12.48 | 16.03 | 16.49 | 0.93 |
| 554.7748 | 62.23  | 16.52 | 15.81 | 16.41 | 16.52 | 0.68 |
| 554.7963 | 51.02  | 21.97 | 23.02 | 23.23 | 23.06 | 1.88 |
| 554.8366 | 45.14  | 16.59 | 17.03 | 16.88 | 17.09 | 0.77 |
| 554.8557 | 46.37  | 17.36 | 19.35 | 19.40 | 19.34 | 1.83 |
| 554.9414 | 68.3   | 13.21 | 13.75 | 11.06 | 11.80 | 0.61 |
| 554.9588 | 62.77  | 13.35 | 18.71 | 11.14 | 11.91 | 0.57 |
| 554.9935 | 17.61  | 12.48 | 15.50 | 16.08 | 14.23 | 1.21 |
| 555.0631 | 17.66  | 13.17 | 13.31 | 13.93 | 13.44 | 0.13 |
| 555.1082 | 17.17  | 11.55 | 17.67 | 16.45 | 16.25 | 1.61 |
| 555.1277 | 18.09  | 15.07 | 18.38 | 18.77 | 18.89 | 1.59 |
| 555.2728 | 163.85 | 23.77 | 23.42 | 24.07 | 23.85 | 0.06 |
| 555.3016 | 212.63 | 18.12 | 19.12 | 18.92 | 18.68 | 0.96 |
| 555.3504 | 249.99 | 24.62 | 20.13 | 19.44 | 20.42 | 2.11 |
| 555.3589 | 58.22  | 17.62 | 20.42 | 17.16 | 17.23 | 0.90 |
| 555.4423 | 218.93 | 16.16 | 12.01 | 12.31 | 14.06 | 1.50 |
| 555.7995 | 51.16  | 18.13 | 19.15 | 19.45 | 19.25 | 1.86 |
| 555.8561 | 41.27  | 10.26 | 12.63 | 13.16 | 13.76 | 1.19 |
| 555.9558 | 52.11  | 11.17 | 13.63 | 12.52 | 11.75 | 1.21 |
| 556.1113 | 17.74  | 13.91 | 18.91 | 17.68 | 16.13 | 1.31 |
| 556.2769 | 155.68 | 22.02 | 21.67 | 22.35 | 22.13 | 0.03 |
| 556.3026 | 213.14 | 18.35 | 19.48 | 19.17 | 18.83 | 1.16 |
| 556.3234 | 207.27 | 19.95 | 19.78 | 19.56 | 19.12 | 0.42 |
| 556.3531 | 237.62 | 22.20 | 16.53 | 16.39 | 17.06 | 2.14 |
| 556.3642 | 67.1   | 10.63 | 16.34 | 9.39  | 9.82  | 0.85 |
| 556.7336 | 66.5   | 18.69 | 19.06 | 19.87 | 19.49 | 1.15 |
| 556.7538 | 72.31  | 14.85 | 12.59 | 14.97 | 14.81 | 0.83 |
| 556.7725 | 72.21  | 14.97 | 13.37 | 14.82 | 15.03 | 0.89 |
| 556.8117 | 43.79  | 18.28 | 19.77 | 19.98 | 19.77 | 1.97 |
| 556.8508 | 43.81  | 16.46 | 16.75 | 17.00 | 17.22 | 0.74 |
| 556.9079 | 33.99  | 14.37 | 13.39 | 13.93 | 14.72 | 0.27 |
| 556.9575 | 66.29  | 13.58 | 13.89 | 11.69 | 12.37 | 0.81 |
| 557.1108 | 21.42  | 12.72 | 16.42 | 15.51 | 15.19 | 1.08 |
| 557.2015 | 63.62  | 8.90  | 22.93 | 8.19  | 8.40  | 1.12 |
| 557.2847 | 158.73 | 22.04 | 21.64 | 22.01 | 21.48 | 0.37 |
| 557.3061 | 208.78 | 15.88 | 17.21 | 16.84 | 16.50 | 0.97 |
| 557.3279 | 207.47 | 18.73 | 17.64 | 17.50 | 17.02 | 1.24 |
| 557.3558 | 227.07 | 18.90 | 8.91  | 7.71  | 9.73  | 2.04 |
| 557.4571 | 242.78 | 16.00 | 15.34 | 15.50 | 15.97 | 0.63 |
| 557.7367 | 69.17  | 13.19 | 8.92  | 14.47 | 12.91 | 0.67 |
| 557.7977 | 51.76  | 15.75 | 16.66 | 16.78 | 16.72 | 1.66 |
| 557.8131 | 47.25  | 12.71 | 16.13 | 15.54 | 15.45 | 1.63 |
| 557.8922 | 46.29  | 12.14 | 13.67 | 12.83 | 13.49 | 0.43 |
| 558.2039 | 55.11  | 11.40 | 21.58 | 9.73  | 10.19 | 0.92 |
| 558.2240 | 120.47 | 13.67 | 11.76 | 15.16 | 14.33 | 0.11 |
| 558.2874 | 170.38 | 20.18 | 19.66 | 20.04 | 19.51 | 0.51 |
| 558.3151 | 225.68 | 16.29 | 9.06  | 8.56  | 10.94 | 1.65 |
| 558.3340 | 245.23 | 14.49 | 20.10 | 19.55 | 19.01 | 1.85 |
| 558.7317 | 59.42  | 17.04 | 16.99 | 18.18 | 17.71 | 0.67 |
| 558.7492 | 52.74  | 19.64 | 19.73 | 20.62 | 20.30 | 0.90 |
| 558.7917 | 46.86  | 16.16 | 16.57 | 16.88 | 16.79 | 1.05 |
| 558.8081 | 48.43  | 18.24 | 19.21 | 19.58 | 19.49 | 1.70 |
| 558.8247 | 38.09  | 16.27 | 17.75 | 17.93 | 17.90 | 1.66 |
| 558.8422 | 36.64  | 14.05 | 12.93 | 13.70 | 13.53 | 0.53 |
| 558.8663 | 46.48  | 16.29 | 14.39 | 14.48 | 15.16 | 0.87 |

|          |        |       |       |       |       |      |
|----------|--------|-------|-------|-------|-------|------|
| 558.8878 | 39.08  | 16.40 | 18.62 | 18.20 | 18.43 | 1.32 |
| 558.9906 | 28.28  | 16.62 | 12.21 | 11.89 | 12.80 | 1.62 |
| 559.0148 | 61.87  | 10.62 | 16.40 | 10.23 | 10.07 | 0.97 |
| 559.0689 | 17.33  | 17.31 | 21.50 | 21.23 | 19.49 | 1.75 |
| 559.2001 | 62.83  | 9.39  | 18.17 | 9.53  | 8.99  | 1.13 |
| 559.2080 | 55.84  | 12.34 | 14.36 | 11.33 | 11.31 | 0.27 |
| 559.2850 | 165.32 | 12.59 | 9.40  | 11.32 | 11.23 | 1.13 |
| 559.2955 | 169.75 | 16.96 | 16.49 | 16.71 | 16.11 | 0.45 |
| 559.3008 | 166.19 | 19.98 | 19.24 | 19.63 | 18.91 | 0.63 |
| 559.3373 | 223.31 | 15.27 | 16.91 | 15.62 | 18.06 | 0.72 |
| 559.4731 | 244.05 | 22.00 | 21.57 | 21.73 | 21.67 | 0.66 |
| 559.7527 | 62.04  | 14.73 | 13.36 | 15.93 | 15.51 | 0.08 |
| 559.8140 | 45.08  | 13.29 | 13.02 | 12.85 | 13.49 | 0.29 |
| 559.8914 | 32.4   | 12.56 | 13.83 | 13.90 | 13.62 | 0.74 |
| 560.0743 | 18.41  | 15.99 | 19.13 | 18.98 | 17.71 | 1.79 |
| 560.1416 | 19.32  | 13.52 | 13.60 | 12.63 | 13.11 | 0.18 |
| 560.2032 | 63.69  | 13.04 | 14.39 | 11.04 | 11.72 | 0.22 |
| 560.2402 | 183.94 | 15.49 | 16.00 | 16.48 | 15.91 | 0.55 |
| 560.3031 | 174.3  | 18.59 | 17.49 | 17.93 | 17.28 | 1.20 |
| 560.3310 | 223.39 | 15.61 | 17.26 | 15.73 | 18.21 | 0.65 |
| 560.4775 | 240.5  | 20.57 | 20.03 | 20.21 | 20.14 | 0.78 |
| 560.7290 | 70.11  | 13.10 | 11.00 | 12.42 | 12.79 | 1.05 |
| 560.7459 | 52.21  | 18.56 | 17.82 | 19.26 | 18.93 | 0.07 |
| 560.8045 | 40.8   | 16.29 | 16.29 | 16.60 | 16.32 | 0.20 |
| 560.8250 | 38.11  | 18.15 | 18.71 | 18.23 | 18.60 | 0.47 |
| 560.8508 | 48.38  | 16.57 | 16.67 | 17.15 | 17.15 | 0.50 |
| 560.9666 | 56.53  | 13.40 | 20.69 | 14.28 | 13.74 | 1.25 |
| 561.0489 | 16.78  | 9.07  | 12.33 | 12.04 | 11.84 | 1.36 |
| 561.0714 | 20.57  | 14.81 | 14.59 | 14.71 | 13.61 | 0.18 |
| 561.2434 | 171.39 | 13.24 | 12.18 | 12.72 | 12.62 | 0.50 |
| 561.3329 | 214.08 | 16.50 | 16.81 | 15.76 | 16.61 | 0.12 |
| 561.4852 | 259.43 | 19.61 | 18.93 | 19.09 | 19.72 | 0.51 |
| 561.7518 | 42.39  | 12.76 | 10.48 | 12.15 | 12.35 | 0.77 |
| 561.8313 | 41.32  | 12.39 | 13.28 | 12.44 | 13.46 | 0.25 |
| 561.9799 | 31.16  | 11.94 | 18.33 | 17.00 | 16.20 | 2.14 |
| 562.0533 | 18.87  | 12.14 | 15.64 | 15.53 | 15.44 | 1.51 |
| 562.2562 | 197.26 | 17.52 | 17.95 | 18.23 | 17.72 | 0.48 |
| 562.3156 | 191.28 | 21.04 | 21.19 | 21.22 | 21.01 | 0.25 |
| 562.3427 | 291.46 | 16.93 | 14.37 | 12.52 | 15.38 | 1.51 |
| 562.4920 | 260.65 | 16.59 | 16.18 | 16.35 | 18.20 | 0.06 |
| 562.7411 | 60.33  | 16.42 | 13.27 | 16.20 | 16.35 | 1.11 |
| 562.7623 | 67.48  | 15.87 | 12.55 | 14.41 | 14.20 | 1.56 |
| 562.7830 | 55.07  | 17.43 | 16.93 | 18.31 | 18.15 | 0.22 |
| 562.8029 | 16.77  | 15.51 | 17.28 | 17.17 | 18.07 | 1.43 |
| 562.8228 | 53.88  | 15.64 | 13.04 | 14.53 | 14.85 | 1.06 |
| 562.8411 | 37.23  | 18.44 | 20.75 | 20.28 | 20.28 | 1.68 |
| 562.8994 | 40.57  | 12.74 | 13.12 | 14.27 | 14.34 | 0.48 |
| 562.9574 | 145.53 | 11.92 | 12.01 | 13.98 | 15.99 | 0.60 |
| 562.9688 | 61.27  | 13.64 | 18.41 | 11.69 | 12.38 | 0.58 |
| 563.1455 | 65.95  | 12.33 | 12.78 | 10.34 | 10.98 | 0.68 |
| 563.1808 | 20.69  | 11.97 | 13.45 | 12.99 | 12.37 | 0.45 |
| 563.2596 | 181.61 | 14.92 | 14.80 | 15.18 | 14.91 | 0.03 |
| 563.3192 | 192.63 | 19.20 | 19.24 | 19.29 | 19.12 | 0.08 |
| 563.3469 | 233.95 | 16.23 | 9.86  | 8.94  | 10.92 | 2.05 |
| 563.5052 | 269.91 | 24.65 | 23.81 | 23.86 | 24.24 | 0.99 |
| 563.7517 | 55.87  | 11.75 | 9.50  | 12.61 | 12.57 | 0.30 |
| 563.8430 | 41.76  | 14.38 | 16.14 | 15.49 | 15.60 | 1.18 |
| 563.8803 | 37.25  | 16.24 | 16.89 | 17.35 | 16.62 | 0.68 |
| 564.3183 | 197.83 | 15.19 | 12.53 | 11.61 | 12.63 | 1.31 |
| 564.3313 | 213.32 | 25.60 | 26.54 | 26.28 | 26.22 | 1.11 |
| 564.5086 | 264.9  | 23.30 | 22.44 | 22.49 | 22.85 | 0.99 |
| 564.6997 | 76.57  | 15.65 | 16.45 | 16.36 | 15.97 | 0.94 |

|          |        |       |       |       |       |      |
|----------|--------|-------|-------|-------|-------|------|
| 564.7211 | 92.91  | 12.74 | 12.02 | 12.20 | 12.00 | 0.47 |
| 564.7622 | 57.56  | 17.22 | 16.88 | 18.51 | 18.19 | 0.50 |
| 564.7799 | 50.77  | 17.58 | 14.89 | 16.62 | 17.07 | 1.56 |
| 564.8356 | 38.19  | 16.17 | 17.76 | 17.87 | 17.22 | 1.29 |
| 564.9153 | 45.3   | 15.28 | 15.86 | 15.91 | 16.42 | 0.36 |
| 564.9364 | 26.07  | 13.55 | 15.43 | 16.22 | 15.61 | 1.14 |
| 564.9980 | 26.73  | 17.09 | 14.18 | 14.12 | 15.10 | 1.26 |
| 565.0490 | 16.75  | 22.16 | 24.11 | 23.96 | 23.58 | 1.88 |
| 565.2192 | 116.93 | 10.69 | 12.74 | 14.00 | 12.19 | 1.02 |
| 565.2764 | 170.92 | 16.51 | 14.75 | 14.90 | 14.86 | 1.47 |
| 565.3348 | 217.98 | 23.89 | 24.73 | 24.44 | 24.42 | 0.97 |
| 565.5152 | 278.22 | 20.98 | 19.99 | 20.09 | 20.57 | 0.94 |
| 565.7598 | 59.13  | 11.40 | 9.43  | 12.66 | 12.77 | 0.17 |
| 565.7979 | 43.28  | 13.03 | 13.60 | 12.75 | 13.33 | 0.23 |
| 565.8233 | 43.04  | 15.64 | 14.78 | 14.54 | 14.67 | 0.67 |
| 565.9022 | 56.14  | 11.34 | 11.41 | 14.37 | 14.15 | 0.74 |
| 565.9220 | 50.52  | 10.24 | 12.26 | 12.97 | 13.36 | 1.03 |
| 566.0524 | 16.85  | 19.38 | 21.14 | 20.99 | 20.71 | 1.90 |
| 566.1076 | 19.11  | 16.76 | 16.15 | 15.26 | 16.55 | 0.47 |
| 566.2501 | 151.03 | 18.46 | 16.17 | 16.50 | 17.11 | 1.62 |
| 566.3428 | 220.81 | 24.67 | 22.62 | 22.17 | 22.54 | 1.93 |
| 566.3830 | 209.41 | 12.53 | 15.36 | 15.96 | 14.41 | 1.61 |
| 566.5212 | 289.12 | 15.82 | 14.51 | 15.09 | 16.51 | 0.34 |
| 566.6984 | 78.21  | 12.72 | 12.79 | 13.49 | 11.87 | 0.11 |
| 566.7159 | 72.05  | 15.17 | 15.68 | 15.69 | 14.88 | 0.46 |
| 566.7603 | 57.58  | 15.59 | 14.72 | 16.84 | 16.49 | 0.15 |
| 566.7761 | 55.49  | 14.61 | 8.17  | 12.36 | 12.06 | 1.42 |
| 566.8074 | 43.95  | 12.99 | 16.43 | 15.69 | 15.60 | 1.97 |
| 566.8301 | 35.72  | 11.87 | 11.65 | 13.93 | 11.77 | 0.26 |
| 566.8529 | 38.02  | 16.71 | 17.76 | 17.15 | 17.67 | 0.93 |
| 566.8746 | 46.68  | 18.83 | 20.44 | 20.49 | 20.46 | 1.68 |
| 566.9761 | 60.83  | 12.84 | 18.27 | 10.50 | 11.34 | 0.55 |
| 566.9978 | 61.56  | 11.36 | 13.90 | 8.82  | 9.18  | 0.00 |
| 567.0540 | 17.39  | 17.50 | 19.14 | 19.06 | 18.77 | 1.79 |
| 567.2349 | 163.45 | 17.45 | 17.87 | 18.30 | 17.44 | 0.75 |
| 567.2536 | 146.42 | 16.49 | 12.67 | 12.86 | 13.94 | 2.09 |
| 567.2942 | 170.79 | 12.44 | 15.47 | 17.11 | 12.67 | 1.21 |
| 567.3560 | 289.93 | 16.33 | 18.89 | 19.28 | 18.93 | 1.35 |
| 567.5365 | 297.37 | 17.37 | 19.56 | 20.44 | 19.67 | 1.05 |
| 567.8410 | 40.14  | 15.66 | 15.89 | 14.60 | 15.26 | 0.21 |
| 567.8777 | 45.39  | 13.81 | 16.44 | 16.40 | 16.47 | 1.63 |
| 567.9268 | 62.78  | 16.47 | 13.23 | 17.17 | 17.26 | 0.64 |
| 567.9830 | 62.25  | 12.61 | 14.29 | 10.64 | 11.30 | 0.08 |
| 568.2377 | 163.82 | 15.25 | 15.66 | 16.08 | 15.13 | 0.56 |
| 568.2679 | 168.15 | 22.58 | 21.55 | 22.26 | 21.12 | 0.70 |
| 568.3624 | 226.64 | 21.88 | 25.02 | 25.21 | 25.48 | 1.51 |
| 568.5390 | 297.39 | 15.39 | 18.17 | 19.12 | 18.23 | 1.10 |
| 568.7872 | 52.63  | 15.52 | 15.64 | 15.97 | 15.61 | 0.36 |
| 568.7904 | 143.1  | 14.03 | 10.70 | 9.55  | 11.34 | 1.27 |
| 568.8116 | 48.4   | 19.48 | 19.44 | 19.69 | 19.80 | 0.22 |
| 568.8377 | 39.78  | 20.20 | 22.34 | 22.46 | 22.27 | 1.92 |
| 568.8716 | 43.55  | 15.56 | 17.31 | 17.25 | 17.57 | 1.35 |
| 568.9161 | 67.85  | 13.79 | 17.33 | 11.93 | 12.57 | 0.44 |
| 568.9762 | 62.14  | 13.27 | 15.20 | 11.21 | 11.89 | 0.02 |
| 569.0090 | 17.66  | 10.24 | 15.93 | 16.29 | 15.27 | 1.82 |
| 569.2313 | 160.91 | 11.52 | 11.26 | 12.81 | 11.24 | 0.18 |
| 569.2716 | 167.33 | 20.64 | 19.41 | 19.96 | 19.24 | 0.91 |
| 569.3661 | 225.68 | 20.71 | 24.25 | 23.51 | 23.98 | 1.49 |
| 569.5427 | 297.36 | 14.25 | 14.72 | 16.32 | 15.82 | 0.57 |
| 569.8189 | 46.74  | 15.67 | 15.24 | 14.36 | 15.16 | 0.69 |
| 569.8413 | 42.91  | 16.26 | 18.66 | 18.83 | 18.66 | 1.86 |
| 569.9162 | 40.76  | 15.76 | 17.60 | 17.48 | 16.71 | 1.32 |



|          |        |       |       |       |       |      |
|----------|--------|-------|-------|-------|-------|------|
| 569.9919 | 22.04  | 13.04 | 17.60 | 17.62 | 16.93 | 1.82 |
| 570.2804 | 152.16 | 21.80 | 20.94 | 21.23 | 21.06 | 1.22 |
| 570.3420 | 202.98 | 16.57 | 15.73 | 15.90 | 14.56 | 0.76 |
| 570.3688 | 223.69 | 18.65 | 20.51 | 19.67 | 21.13 | 0.90 |
| 570.7488 | 65.85  | 15.68 | 14.81 | 16.16 | 15.83 | 0.28 |
| 570.7706 | 54.12  | 21.90 | 22.46 | 23.00 | 22.81 | 1.63 |
| 570.8091 | 52.37  | 17.18 | 17.09 | 17.48 | 17.59 | 0.22 |
| 570.8305 | 47.92  | 18.07 | 20.03 | 20.21 | 20.06 | 1.90 |
| 570.9155 | 69.19  | 10.17 | 12.78 | 9.02  | 9.55  | 0.47 |
| 570.9327 | 62.28  | 8.10  | 17.58 | 9.24  | 8.71  | 1.19 |
| 571.1128 | 72.23  | 8.80  | 9.52  | 11.22 | 12.03 | 0.72 |
| 571.2158 | 63.59  | 13.91 | 14.77 | 12.10 | 12.74 | 0.40 |
| 571.2891 | 163.59 | 21.82 | 21.48 | 21.71 | 21.27 | 0.50 |
| 571.3494 | 193.76 | 14.18 | 13.22 | 13.99 | 13.40 | 0.37 |
| 571.3711 | 208.62 | 16.48 | 18.08 | 16.53 | 18.50 | 0.64 |
| 571.7737 | 55.5   | 18.04 | 18.48 | 19.19 | 18.95 | 1.43 |
| 571.8346 | 47.13  | 13.04 | 15.17 | 15.57 | 15.43 | 1.50 |
| 571.9293 | 48.88  | 11.83 | 14.46 | 14.03 | 13.45 | 1.07 |
| 572.0369 | 17.13  | 11.89 | 15.81 | 15.11 | 13.02 | 1.40 |
| 572.2965 | 160.02 | 21.71 | 20.82 | 21.00 | 20.64 | 1.31 |
| 572.3211 | 178.08 | 11.55 | 14.57 | 15.00 | 12.44 | 1.59 |
| 572.7077 | 67.99  | 16.73 | 16.87 | 18.13 | 17.61 | 0.83 |
| 572.7287 | 65.74  | 14.82 | 13.13 | 15.91 | 15.29 | 0.27 |
| 572.7467 | 66.22  | 15.04 | 12.74 | 14.59 | 14.33 | 1.35 |
| 572.7687 | 53.76  | 20.47 | 20.89 | 21.50 | 21.28 | 1.51 |
| 572.7861 | 53.93  | 17.61 | 18.49 | 19.04 | 18.78 | 1.76 |
| 572.8250 | 46.86  | 16.32 | 15.66 | 16.27 | 16.44 | 0.38 |
| 572.8823 | 39.47  | 14.39 | 13.34 | 14.00 | 14.39 | 0.35 |
| 572.9291 | 67.79  | 11.87 | 12.81 | 10.09 | 10.62 | 0.36 |
| 573.1721 | 63.72  | 18.63 | 21.97 | 18.17 | 18.22 | 0.95 |
| 573.1961 | 64.5   | 14.12 | 17.57 | 12.32 | 12.91 | 0.44 |
| 573.2431 | 163.13 | 15.71 | 14.44 | 14.72 | 14.82 | 1.10 |
| 573.3000 | 167.99 | 19.76 | 18.80 | 18.97 | 18.64 | 1.35 |
| 573.3316 | 175.02 | 12.27 | 12.77 | 13.04 | 13.84 | 0.32 |
| 573.7460 | 60.47  | 12.91 | 10.77 | 13.05 | 12.70 | 0.70 |
| 573.7717 | 55.97  | 16.14 | 16.14 | 17.14 | 16.87 | 0.81 |
| 573.7862 | 45.62  | 13.23 | 13.38 | 13.30 | 13.44 | 0.14 |
| 573.8662 | 45.29  | 13.07 | 13.59 | 12.86 | 13.42 | 0.13 |
| 573.9476 | 44.66  | 12.58 | 12.96 | 13.17 | 12.92 | 0.50 |
| 574.0293 | 22.67  | 9.52  | 11.96 | 12.21 | 11.36 | 1.56 |
| 574.1776 | 55.65  | 18.25 | 21.38 | 17.78 | 17.83 | 0.93 |
| 574.1974 | 65.67  | 14.11 | 15.39 | 12.40 | 12.98 | 0.16 |
| 574.3098 | 174.57 | 17.79 | 16.18 | 16.56 | 16.10 | 1.52 |
| 574.7060 | 69.46  | 15.16 | 15.16 | 16.58 | 16.12 | 0.61 |
| 574.7234 | 63.11  | 17.66 | 17.76 | 18.98 | 18.56 | 0.80 |
| 574.7662 | 56.77  | 17.00 | 17.25 | 18.16 | 17.84 | 1.13 |
| 574.7823 | 52.02  | 17.78 | 17.91 | 18.55 | 18.47 | 0.83 |
| 574.7986 | 39.64  | 16.84 | 17.86 | 18.10 | 18.13 | 1.42 |
| 574.8178 | 41.66  | 14.15 | 12.38 | 13.65 | 13.21 | 0.74 |
| 574.8404 | 47.43  | 15.45 | 14.15 | 13.65 | 14.36 | 0.84 |
| 574.8619 | 40.59  | 18.18 | 20.79 | 20.43 | 20.48 | 1.60 |
| 574.9904 | 63.23  | 12.52 | 14.06 | 10.57 | 11.21 | 0.13 |
| 575.1725 | 55.68  | 12.45 | 20.44 | 10.40 | 11.05 | 0.77 |
| 575.2609 | 151.73 | 18.58 | 18.07 | 18.58 | 18.51 | 0.47 |
| 575.3094 | 166.25 | 13.46 | 10.25 | 9.80  | 10.02 | 1.53 |
| 575.3196 | 174.96 | 13.65 | 10.73 | 11.00 | 10.91 | 1.24 |
| 575.4471 | 257.5  | 14.94 | 14.87 | 15.68 | 16.03 | 0.25 |
| 575.7901 | 49.94  | 12.45 | 13.04 | 13.37 | 13.21 | 0.45 |
| 575.8653 | 41.28  | 13.26 | 16.45 | 16.04 | 16.22 | 1.44 |
| 576.0763 | 18.05  | 13.10 | 16.53 | 15.44 | 14.42 | 1.15 |
| 576.1765 | 63.87  | 13.43 | 16.02 | 11.44 | 12.14 | 0.20 |
| 576.2648 | 162.27 | 16.69 | 15.89 | 16.45 | 16.41 | 0.82 |

|          |        |       |       |       |       |      |
|----------|--------|-------|-------|-------|-------|------|
| 576.2873 | 189.08 | 13.90 | 11.87 | 11.61 | 12.54 | 1.12 |
| 576.3312 | 196.88 | 18.75 | 18.21 | 18.45 | 17.96 | 0.58 |
| 576.7190 | 63.37  | 17.17 | 16.06 | 17.80 | 17.52 | 0.28 |
| 576.7783 | 54.22  | 15.80 | 15.33 | 16.02 | 16.22 | 0.11 |
| 576.7996 | 38.62  | 18.28 | 18.94 | 18.02 | 18.60 | 0.35 |
| 576.8264 | 52.06  | 15.86 | 15.10 | 16.28 | 16.40 | 0.16 |
| 576.8577 | 42.37  | 16.00 | 17.66 | 17.14 | 17.44 | 1.22 |
| 576.9381 | 58.05  | 11.82 | 10.71 | 13.94 | 13.54 | 0.23 |
| 577.0625 | 19.33  | 13.51 | 17.50 | 17.64 | 16.88 | 1.75 |
| 577.2554 | 164.15 | 16.64 | 16.09 | 16.72 | 16.70 | 0.28 |
| 577.2767 | 172.91 | 18.51 | 17.64 | 18.01 | 18.02 | 1.13 |
| 577.3453 | 261.66 | 16.00 | 16.38 | 16.20 | 16.39 | 0.21 |
| 577.3751 | 200.83 | 13.54 | 15.51 | 14.59 | 12.39 | 0.38 |
| 577.8058 | 42.66  | 13.84 | 13.61 | 13.02 | 13.71 | 0.41 |
| 577.8963 | 38.74  | 12.63 | 10.92 | 11.93 | 12.07 | 0.50 |
| 578.0892 | 24.66  | 13.69 | 12.72 | 11.78 | 12.00 | 0.62 |
| 578.2816 | 171.11 | 16.65 | 16.06 | 16.49 | 15.88 | 0.49 |
| 578.3032 | 200.64 | 19.05 | 19.36 | 19.34 | 19.31 | 0.48 |
| 578.3275 | 144.28 | 14.29 | 13.78 | 14.26 | 13.99 | 0.17 |
| 578.3469 | 225.43 | 23.82 | 24.51 | 24.27 | 24.05 | 0.74 |
| 578.5160 | 238.43 | 12.33 | 15.69 | 15.88 | 16.04 | 1.20 |
| 578.7138 | 61.74  | 15.76 | 12.31 | 16.01 | 16.14 | 0.79 |
| 578.7363 | 65.64  | 16.47 | 16.08 | 16.51 | 16.18 | 0.30 |
| 578.7574 | 57.06  | 12.57 | 8.65  | 13.56 | 12.44 | 0.44 |
| 578.7773 | 60.53  | 15.08 | 12.71 | 14.85 | 14.93 | 0.91 |
| 578.7980 | 47.98  | 15.55 | 13.86 | 13.99 | 14.18 | 1.33 |
| 578.8149 | 43.36  | 19.45 | 21.06 | 20.76 | 20.68 | 1.78 |
| 578.8730 | 41.21  | 14.44 | 17.03 | 16.89 | 17.04 | 1.58 |
| 579.0113 | 210.39 | 13.93 | 14.89 | 14.98 | 13.60 | 0.67 |
| 579.0863 | 25.96  | 13.80 | 14.80 | 14.79 | 12.18 | 0.26 |
| 579.1821 | 65.06  | 14.08 | 15.31 | 12.34 | 12.94 | 0.18 |
| 579.2983 | 191.58 | 17.90 | 17.73 | 17.83 | 17.63 | 0.22 |
| 579.3506 | 228.41 | 22.07 | 22.79 | 22.53 | 22.32 | 0.76 |
| 579.4415 | 231.42 | 15.73 | 11.84 | 11.23 | 13.86 | 1.66 |
| 579.7558 | 58.05  | 12.47 | 10.26 | 12.68 | 12.57 | 0.54 |
| 579.8179 | 45.66  | 14.32 | 16.69 | 16.14 | 16.00 | 1.61 |
| 579.8551 | 38.29  | 16.13 | 16.72 | 16.97 | 16.20 | 0.48 |
| 580.2927 | 195.63 | 18.22 | 17.69 | 17.67 | 17.76 | 0.83 |
| 580.3257 | 186.88 | 18.61 | 18.57 | 18.59 | 18.36 | 0.05 |
| 580.3593 | 242.83 | 23.84 | 20.45 | 20.09 | 21.14 | 2.15 |
| 580.6740 | 75.7   | 12.92 | 14.91 | 14.94 | 13.56 | 0.82 |
| 580.6951 | 91.06  | 11.57 | 12.03 | 12.54 | 11.45 | 0.29 |
| 580.7343 | 74.98  | 14.96 | 13.11 | 14.38 | 14.01 | 1.16 |
| 580.7524 | 61.5   | 16.99 | 16.24 | 17.65 | 17.17 | 0.11 |
| 580.8106 | 34.41  | 17.21 | 18.54 | 18.68 | 18.27 | 1.46 |
| 580.8687 | 40.3   | 13.14 | 11.94 | 11.82 | 13.31 | 0.36 |
| 580.8903 | 46.59  | 16.83 | 17.41 | 17.50 | 17.54 | 0.58 |
| 580.9110 | 35.68  | 12.84 | 12.96 | 13.44 | 13.31 | 0.29 |
| 580.9726 | 26.95  | 15.82 | 11.67 | 11.44 | 11.95 | 1.41 |
| 580.9933 | 63.34  | 9.49  | 14.29 | 8.70  | 9.05  | 0.93 |
| 581.0007 | 34.48  | 10.35 | 13.26 | 12.38 | 10.68 | 1.34 |
| 581.2477 | 163.72 | 12.50 | 13.13 | 13.99 | 13.38 | 0.65 |
| 581.2903 | 184.75 | 13.53 | 12.63 | 13.23 | 12.88 | 0.39 |
| 581.3292 | 183.39 | 15.12 | 13.91 | 13.62 | 13.81 | 0.67 |
| 581.3614 | 223.06 | 21.92 | 16.78 | 16.79 | 17.51 | 2.15 |
| 581.4565 | 239.24 | 19.84 | 18.23 | 18.73 | 19.21 | 1.52 |
| 581.7719 | 46.91  | 13.42 | 13.55 | 13.16 | 13.50 | 0.03 |
| 581.8016 | 53.12  | 13.12 | 13.27 | 13.61 | 13.54 | 0.38 |
| 581.8536 | 38.7   | 12.87 | 12.81 | 11.98 | 11.71 | 0.24 |
| 581.8886 | 42.17  | 10.44 | 11.43 | 12.78 | 12.66 | 0.71 |
| 582.2245 | 134.28 | 15.77 | 16.03 | 16.82 | 16.30 | 0.53 |
| 582.2587 | 174.25 | 11.16 | 9.79  | 10.92 | 11.44 | 0.33 |

|          |        |       |       |       |       |      |
|----------|--------|-------|-------|-------|-------|------|
| 582.2815 | 192.56 | 15.27 | 13.11 | 13.29 | 13.27 | 1.03 |
| 582.3415 | 201.65 | 18.43 | 18.44 | 18.50 | 18.38 | 0.02 |
| 582.3777 | 238.03 | 21.20 | 24.29 | 23.48 | 23.71 | 1.60 |
| 582.4595 | 239.3  | 17.90 | 15.16 | 15.89 | 16.98 | 1.36 |
| 582.6727 | 83.1   | 9.48  | 11.45 | 11.45 | 11.01 | 0.80 |
| 582.6903 | 71.77  | 13.41 | 12.77 | 13.47 | 12.74 | 0.32 |
| 582.7494 | 69.46  | 14.99 | 11.62 | 15.00 | 13.71 | 0.93 |
| 582.7812 | 51.44  | 13.41 | 15.45 | 15.13 | 15.17 | 1.38 |
| 582.8046 | 38.06  | 14.00 | 14.79 | 16.04 | 14.14 | 0.62 |
| 582.8274 | 46.88  | 17.01 | 17.03 | 16.15 | 16.81 | 0.41 |
| 582.8489 | 41.12  | 19.26 | 20.58 | 20.75 | 20.70 | 1.72 |
| 582.9529 | 61.93  | 9.10  | 18.26 | 8.59  | 8.75  | 1.08 |
| 582.9732 | 58.85  | 12.83 | 17.73 | 9.50  | 10.16 | 0.24 |
| 583.2277 | 132.11 | 12.71 | 10.95 | 13.08 | 12.08 | 0.44 |
| 583.2571 | 43.39  | 15.65 | 16.00 | 16.42 | 15.83 | 0.33 |
| 583.3442 | 202.35 | 16.08 | 15.80 | 16.11 | 15.81 | 0.12 |
| 583.3819 | 248.86 | 18.89 | 22.82 | 21.80 | 22.13 | 1.69 |
| 583.4736 | 238.7  | 19.41 | 19.88 | 20.05 | 19.73 | 0.68 |
| 583.8188 | 44.44  | 15.56 | 16.70 | 15.75 | 16.02 | 0.58 |
| 583.8517 | 47.08  | 14.51 | 16.57 | 16.76 | 16.66 | 1.55 |
| 583.9004 | 62.82  | 15.35 | 11.62 | 16.25 | 16.35 | 0.65 |
| 583.9601 | 63.2   | 11.00 | 15.55 | 10.74 | 11.71 | 1.05 |
| 584.2400 | 184.44 | 16.78 | 17.33 | 17.68 | 16.77 | 0.73 |
| 584.2608 | 44.15  | 13.52 | 12.54 | 12.89 | 13.08 | 0.34 |
| 584.3579 | 226.38 | 20.83 | 16.56 | 14.96 | 17.12 | 1.87 |
| 584.3845 | 233.51 | 16.76 | 19.61 | 18.32 | 19.18 | 1.15 |
| 584.4772 | 239.16 | 17.59 | 18.36 | 18.55 | 18.34 | 0.97 |
| 584.7632 | 66.99  | 15.09 | 11.63 | 15.30 | 14.94 | 0.73 |
| 584.7861 | 53.55  | 19.31 | 18.80 | 19.61 | 19.26 | 0.25 |
| 584.8068 | 44.14  | 20.21 | 22.00 | 22.30 | 22.06 | 1.87 |
| 584.8254 | 46.07  | 15.31 | 14.90 | 14.46 | 15.20 | 0.40 |
| 584.8457 | 44.95  | 16.92 | 18.45 | 18.46 | 18.60 | 1.72 |
| 584.9508 | 54.58  | 12.74 | 16.26 | 10.74 | 11.41 | 0.39 |
| 584.9716 | 47.9   | 9.46  | 12.46 | 11.54 | 10.25 | 0.80 |
| 585.0778 | 22.91  | 12.56 | 15.68 | 14.31 | 13.70 | 1.03 |
| 585.2437 | 195.26 | 13.60 | 13.61 | 14.95 | 13.25 | 0.27 |
| 585.3050 | 172.27 | 15.60 | 14.64 | 16.29 | 14.93 | 0.23 |
| 585.3318 | 200.28 | 14.33 | 11.50 | 13.67 | 11.74 | 0.94 |
| 585.3437 | 199.93 | 14.96 | 20.48 | 14.04 | 17.21 | 0.70 |
| 585.3614 | 205.29 | 18.43 | 16.24 | 16.56 | 16.53 | 1.42 |
| 585.3869 | 215.3  | 10.94 | 12.77 | 14.43 | 13.33 | 0.82 |
| 585.4878 | 259.1  | 19.50 | 18.61 | 18.99 | 19.65 | 0.83 |
| 585.5110 | 255.85 | 18.42 | 18.76 | 18.85 | 18.60 | 0.34 |
| 585.7927 | 44.5   | 14.40 | 13.60 | 13.51 | 14.00 | 1.10 |
| 585.8102 | 50.92  | 16.07 | 18.18 | 18.59 | 18.32 | 1.87 |
| 585.8232 | 40.23  | 13.76 | 13.51 | 13.39 | 13.96 | 0.25 |
| 585.8883 | 42.86  | 15.55 | 16.64 | 16.60 | 16.03 | 1.11 |
| 585.9685 | 48.74  | 12.50 | 14.98 | 15.55 | 13.56 | 1.33 |
| 585.9965 | 18.06  | 11.03 | 12.68 | 11.96 | 12.32 | 0.77 |
| 586.0645 | 22.12  | 15.35 | 13.72 | 14.08 | 14.13 | 0.67 |
| 586.3157 | 194.04 | 20.96 | 21.14 | 21.10 | 20.75 | 0.20 |
| 586.4919 | 258.5  | 16.81 | 15.38 | 16.71 | 17.47 | 0.46 |
| 586.5143 | 255.47 | 15.69 | 16.98 | 16.80 | 16.37 | 0.74 |
| 586.7229 | 74.51  | 13.47 | 10.87 | 12.68 | 12.30 | 1.05 |
| 586.7442 | 56.98  | 21.28 | 21.62 | 22.44 | 22.16 | 1.23 |
| 586.7640 | 60.06  | 15.39 | 13.51 | 15.76 | 15.43 | 0.56 |
| 586.7834 | 48.97  | 17.53 | 16.30 | 17.71 | 17.65 | 0.73 |
| 586.8055 | 49.01  | 18.38 | 20.07 | 20.44 | 20.22 | 1.84 |
| 586.9149 | 36.49  | 13.63 | 15.01 | 14.93 | 15.01 | 0.83 |
| 587.0829 | 19.48  | 12.29 | 16.91 | 16.32 | 15.24 | 2.07 |
| 587.1920 | 64.32  | 12.39 | 13.96 | 10.40 | 11.05 | 0.13 |
| 587.3192 | 190.49 | 19.25 | 19.36 | 19.35 | 18.97 | 0.09 |

|          |        |       |       |       |       |      |
|----------|--------|-------|-------|-------|-------|------|
| 587.3745 | 261.09 | 13.57 | 13.40 | 13.75 | 13.03 | 0.04 |
| 587.5049 | 261.88 | 18.87 | 18.30 | 18.47 | 18.50 | 0.61 |
| 587.7476 | 56.47  | 17.35 | 17.36 | 18.63 | 18.30 | 0.81 |
| 587.8089 | 49.99  | 13.57 | 15.57 | 15.93 | 15.68 | 1.55 |
| 587.9068 | 55.22  | 12.19 | 14.39 | 15.95 | 15.07 | 1.31 |
| 588.0764 | 17.08  | 17.80 | 19.30 | 19.35 | 19.13 | 1.85 |
| 588.3185 | 200.26 | 15.12 | 13.95 | 13.43 | 14.22 | 0.71 |
| 588.3314 | 209.59 | 24.78 | 25.39 | 25.34 | 25.11 | 0.83 |
| 588.5087 | 260.96 | 16.77 | 15.62 | 16.31 | 16.08 | 0.64 |
| 588.7025 | 75.95  | 13.54 | 12.54 | 14.82 | 13.86 | 0.03 |
| 588.7215 | 70.25  | 14.41 | 12.35 | 13.21 | 12.99 | 1.51 |
| 588.7425 | 57.03  | 20.03 | 20.29 | 21.14 | 20.88 | 1.10 |
| 588.7606 | 54.7   | 16.56 | 16.76 | 17.74 | 17.39 | 1.07 |
| 588.7796 | 46.47  | 13.75 | 10.43 | 12.28 | 12.69 | 1.40 |
| 588.8006 | 50.83  | 15.70 | 15.38 | 16.17 | 16.07 | 0.08 |
| 588.8777 | 41.61  | 15.93 | 17.70 | 17.27 | 17.58 | 1.16 |
| 588.8984 | 40.83  | 13.91 | 16.25 | 15.95 | 15.75 | 1.01 |
| 588.9887 | 16.9   | 10.40 | 16.45 | 15.26 | 12.69 | 1.77 |
| 589.0195 | 20.21  | 11.87 | 16.72 | 16.79 | 16.01 | 2.09 |
| 589.0843 | 18.22  | 15.72 | 17.30 | 17.10 | 17.04 | 1.60 |
| 589.1698 | 56.75  | 11.65 | 20.91 | 9.77  | 10.33 | 0.86 |
| 589.2171 | 170.94 | 12.89 | 13.36 | 14.44 | 13.34 | 0.54 |
| 589.3348 | 205.86 | 23.16 | 23.65 | 23.54 | 23.37 | 0.63 |
| 589.5199 | 274.64 | 19.59 | 18.98 | 19.51 | 19.68 | 0.27 |
| 589.7457 | 58.01  | 15.73 | 14.97 | 16.85 | 16.55 | 0.17 |
| 589.7598 | 57.09  | 13.80 | 14.05 | 15.44 | 14.85 | 0.75 |
| 589.8435 | 39.05  | 11.94 | 13.30 | 12.74 | 13.11 | 0.57 |
| 589.9021 | 43.07  | 11.10 | 10.39 | 12.33 | 12.18 | 0.14 |
| 589.9215 | 50.22  | 12.05 | 12.50 | 13.03 | 13.17 | 0.67 |
| 590.0257 | 30.02  | 12.09 | 12.94 | 12.92 | 12.41 | 0.46 |
| 590.1736 | 65.15  | 9.61  | 18.55 | 8.69  | 9.53  | 1.05 |
| 590.2507 | 148.07 | 18.42 | 16.31 | 17.40 | 17.42 | 1.61 |
| 590.3428 | 223.05 | 22.02 | 22.18 | 21.79 | 21.84 | 0.04 |
| 590.5237 | 272.01 | 17.70 | 16.77 | 17.60 | 17.94 | 0.31 |
| 590.7018 | 71.56  | 12.66 | 10.28 | 11.73 | 11.92 | 1.20 |
| 590.7404 | 57.42  | 16.91 | 16.86 | 18.21 | 17.86 | 0.66 |
| 590.7565 | 47.56  | 16.39 | 15.63 | 17.36 | 17.16 | 0.10 |
| 590.7726 | 45.26  | 16.56 | 17.34 | 17.16 | 17.53 | 0.77 |
| 590.8359 | 43.42  | 19.60 | 22.00 | 21.74 | 21.69 | 1.78 |
| 591.1687 | 65.38  | 14.25 | 15.20 | 12.65 | 13.19 | 0.29 |
| 591.2348 | 151.38 | 16.32 | 17.10 | 17.86 | 17.06 | 1.33 |
| 591.2544 | 146.1  | 16.54 | 12.69 | 13.15 | 14.87 | 1.97 |
| 591.2923 | 166.89 | 15.18 | 11.69 | 12.99 | 13.05 | 1.64 |
| 591.3458 | 219.78 | 19.96 | 19.60 | 18.90 | 19.26 | 0.65 |
| 591.7644 | 55.94  | 13.45 | 13.20 | 14.43 | 13.75 | 0.19 |
| 591.8049 | 45.1   | 13.17 | 17.08 | 16.43 | 16.43 | 1.82 |
| 591.8411 | 42.64  | 15.16 | 18.24 | 17.95 | 17.93 | 1.71 |
| 591.9738 | 23.35  | 15.67 | 16.47 | 17.12 | 16.65 | 0.77 |
| 592.2384 | 151.62 | 12.79 | 13.40 | 15.29 | 13.99 | 0.87 |
| 592.2665 | 178.55 | 18.31 | 17.42 | 18.20 | 17.14 | 0.54 |
| 592.2983 | 180.29 | 13.62 | 11.37 | 11.21 | 10.25 | 1.06 |
| 592.3260 | 178.36 | 11.63 | 13.51 | 14.67 | 11.58 | 0.90 |
| 592.3643 | 286.57 | 18.64 | 17.12 | 17.14 | 17.08 | 0.96 |
| 592.6893 | 54.39  | 13.74 | 9.79  | 12.38 | 13.03 | 1.35 |
| 592.7351 | 62.84  | 13.82 | 10.70 | 13.23 | 12.92 | 1.15 |
| 592.7525 | 61.82  | 15.33 | 12.63 | 14.47 | 14.90 | 1.26 |
| 592.7731 | 45.58  | 18.37 | 18.47 | 17.53 | 17.84 | 0.38 |
| 592.8054 | 51.65  | 10.84 | 15.31 | 14.28 | 14.79 | 1.27 |
| 592.8330 | 44.59  | 17.61 | 19.35 | 19.11 | 19.14 | 1.65 |
| 592.8663 | 285.89 | 18.42 | 17.05 | 17.01 | 17.25 | 0.95 |
| 593.0919 | 18.93  | 10.99 | 12.52 | 13.30 | 11.41 | 0.61 |
| 593.2300 | 155.38 | 12.27 | 12.46 | 14.56 | 13.47 | 0.67 |

|          |        |       |       |       |       |      |
|----------|--------|-------|-------|-------|-------|------|
| 593.2507 | 166.15 | 16.15 | 16.30 | 16.84 | 16.18 | 0.47 |
| 593.2701 | 183.21 | 16.16 | 15.93 | 16.58 | 16.01 | 0.03 |
| 593.3078 | 173.9  | 15.08 | 12.58 | 14.35 | 12.09 | 0.92 |
| 593.3710 | 287.52 | 17.58 | 16.11 | 16.04 | 16.11 | 1.03 |
| 593.7789 | 48.58  | 12.86 | 13.12 | 13.19 | 13.32 | 0.25 |
| 593.8102 | 44.51  | 12.12 | 13.85 | 13.56 | 13.85 | 1.30 |
| 593.8369 | 46.18  | 11.50 | 13.01 | 12.82 | 12.81 | 0.84 |
| 593.8729 | 40.61  | 13.27 | 11.53 | 11.06 | 11.77 | 0.66 |
| 594.2539 | 166.5  | 13.37 | 12.99 | 14.23 | 13.24 | 0.10 |
| 594.2823 | 184.34 | 17.23 | 16.16 | 16.37 | 15.92 | 1.06 |
| 594.3042 | 185.85 | 15.71 | 13.32 | 14.59 | 13.25 | 1.19 |
| 594.3419 | 183.54 | 15.73 | 16.70 | 17.26 | 15.62 | 0.54 |
| 594.3780 | 209.95 | 18.02 | 16.59 | 16.14 | 17.33 | 1.30 |
| 594.6875 | 63     | 13.56 | 10.26 | 12.71 | 13.05 | 1.17 |
| 594.7107 | 64.85  | 16.49 | 16.79 | 17.37 | 16.89 | 0.83 |
| 594.7708 | 63.22  | 15.89 | 13.94 | 15.32 | 15.37 | 1.08 |
| 594.7896 | 41.18  | 19.72 | 20.95 | 20.77 | 20.56 | 1.60 |
| 594.8222 | 41.04  | 14.09 | 13.25 | 13.40 | 13.76 | 0.40 |
| 594.8471 | 43.47  | 15.45 | 18.44 | 18.47 | 18.50 | 1.75 |
| 594.9638 | 157.39 | 14.25 | 14.22 | 14.93 | 14.66 | 0.35 |
| 595.1577 | 56.67  | 17.51 | 19.22 | 17.02 | 17.09 | 0.68 |
| 595.2664 | 178.57 | 13.02 | 13.76 | 14.58 | 13.27 | 0.67 |
| 595.2891 | 139.24 | 18.58 | 18.63 | 19.05 | 18.63 | 0.20 |
| 595.3222 | 181.05 | 16.43 | 13.62 | 14.66 | 12.41 | 0.90 |
| 595.3452 | 172.96 | 12.06 | 14.29 | 14.84 | 13.65 | 1.01 |
| 595.3878 | 196.25 | 17.92 | 17.31 | 16.77 | 15.98 | 0.78 |
| 595.5312 | 268.44 | 17.60 | 15.45 | 15.76 | 16.44 | 1.08 |
| 595.7920 | 50.04  | 15.26 | 16.41 | 16.02 | 15.82 | 1.14 |
| 595.8279 | 40.6   | 16.39 | 16.45 | 16.34 | 16.02 | 0.04 |
| 596.0922 | 19.99  | 13.39 | 16.95 | 17.12 | 15.75 | 1.88 |
| 596.1595 | 65.07  | 14.18 | 15.16 | 12.53 | 13.08 | 0.28 |
| 596.2630 | 196.37 | 15.49 | 16.10 | 16.07 | 14.86 | 0.42 |
| 596.2953 | 151.53 | 17.51 | 15.26 | 16.42 | 16.61 | 1.21 |
| 596.3255 | 183.33 | 15.26 | 13.48 | 14.89 | 11.02 | 0.57 |
| 596.3568 | 207    | 15.19 | 12.60 | 12.12 | 12.06 | 1.10 |
| 596.3923 | 195.49 | 17.00 | 16.52 | 16.47 | 16.15 | 0.49 |
| 596.6698 | 87.88  | 8.50  | 11.00 | 11.27 | 9.47  | 0.86 |
| 596.7089 | 76.11  | 15.21 | 14.94 | 15.22 | 15.01 | 0.21 |
| 596.7265 | 60.87  | 16.91 | 16.81 | 17.97 | 17.45 | 0.63 |
| 596.7852 | 43.47  | 18.33 | 19.13 | 19.18 | 18.89 | 1.51 |
| 596.8434 | 38.51  | 13.81 | 12.86 | 12.84 | 13.77 | 0.57 |
| 596.8646 | 44.26  | 17.61 | 18.12 | 18.04 | 18.39 | 0.57 |
| 596.8848 | 42.86  | 13.48 | 16.51 | 16.64 | 16.21 | 1.70 |
| 596.9691 | 62.94  | 8.59  | 14.70 | 8.36  | 8.59  | 1.12 |
| 597.0083 | 60.31  | 12.29 | 16.59 | 10.28 | 10.95 | 0.49 |
| 597.0210 | 199.89 | 12.47 | 11.74 | 11.65 | 12.49 | 0.31 |
| 597.0274 | 25.74  | 17.78 | 19.63 | 19.10 | 18.58 | 1.22 |
| 597.0745 | 19.29  | 11.97 | 16.59 | 16.43 | 15.76 | 1.57 |
| 597.1531 | 65.64  | 13.07 | 13.42 | 11.07 | 11.74 | 0.75 |
| 597.2433 | 150.3  | 15.46 | 12.25 | 12.92 | 13.71 | 1.70 |
| 597.3052 | 161.44 | 20.57 | 19.76 | 20.21 | 20.01 | 0.79 |
| 597.3959 | 192.38 | 14.45 | 15.18 | 14.65 | 14.18 | 0.30 |
| 597.4302 | 239.86 | 17.72 | 16.76 | 17.45 | 17.59 | 0.61 |
| 597.7459 | 58.53  | 14.04 | 13.97 | 15.92 | 15.48 | 0.72 |
| 597.7757 | 55.25  | 13.12 | 12.99 | 13.34 | 13.37 | 0.04 |
| 597.8304 | 41.26  | 13.71 | 12.76 | 11.62 | 12.87 | 0.76 |
| 598.0318 | 18.4   | 13.11 | 14.19 | 13.29 | 13.67 | 0.45 |
| 598.0863 | 17.04  | 10.99 | 14.74 | 13.14 | 14.03 | 0.86 |
| 598.2562 | 195.2  | 12.42 | 12.32 | 12.29 | 11.20 | 0.12 |
| 598.2904 | 217.78 | 16.62 | 11.48 | 11.25 | 12.45 | 1.86 |
| 598.3094 | 162.36 | 18.93 | 17.98 | 18.46 | 18.26 | 1.07 |
| 598.3734 | 199.08 | 16.73 | 13.79 | 14.99 | 14.26 | 1.73 |

|          |        |       |       |       |       |      |
|----------|--------|-------|-------|-------|-------|------|
| 598.4336 | 246.02 | 14.46 | 12.52 | 13.48 | 13.72 | 0.80 |
| 598.7231 | 70.98  | 15.64 | 14.59 | 16.11 | 15.79 | 0.32 |
| 598.7510 | 58.2   | 13.83 | 14.46 | 16.09 | 15.58 | 1.13 |
| 598.7797 | 39.54  | 15.45 | 15.99 | 16.71 | 16.02 | 0.93 |
| 598.8021 | 46.08  | 16.00 | 14.15 | 14.67 | 15.17 | 1.13 |
| 598.8226 | 50.04  | 19.23 | 20.19 | 20.57 | 20.48 | 1.58 |
| 598.8615 | 46.12  | 13.73 | 13.57 | 13.46 | 14.08 | 0.07 |
| 598.9242 | 166.28 | 7.56  | 10.99 | 11.64 | 14.39 | 1.35 |
| 598.9268 | 54.18  | 5.95  | 19.30 | 7.72  | 8.65  | 1.43 |
| 598.9451 | 60.13  | 11.41 | 17.05 | 8.87  | 9.26  | 0.46 |
| 599.0173 | 215.95 | 10.15 | 11.78 | 11.66 | 11.73 | 0.69 |
| 599.0224 | 19.79  | 15.22 | 17.50 | 17.42 | 17.60 | 1.24 |
| 599.0986 | 17.87  | 14.43 | 18.59 | 18.34 | 18.51 | 1.55 |
| 599.2598 | 163.42 | 17.17 | 16.47 | 16.74 | 16.62 | 0.77 |
| 599.3211 | 179.56 | 22.24 | 21.57 | 21.93 | 21.59 | 0.79 |
| 599.7519 | 57.57  | 12.84 | 12.85 | 15.47 | 14.51 | 0.66 |
| 599.7916 | 47.31  | 14.94 | 17.24 | 16.67 | 16.56 | 1.77 |
| 599.8255 | 49.05  | 14.89 | 16.24 | 16.51 | 16.38 | 1.46 |
| 599.9280 | 64.14  | 9.96  | 13.04 | 8.95  | 9.69  | 0.62 |
| 600.1064 | 17.56  | 20.12 | 19.90 | 19.36 | 18.47 | 0.35 |
| 600.2639 | 154.91 | 15.10 | 13.27 | 13.97 | 14.02 | 1.29 |
| 600.3273 | 184.16 | 20.66 | 19.87 | 20.26 | 19.95 | 1.00 |
| 600.3525 | 186.91 | 10.19 | 13.97 | 14.04 | 12.11 | 1.61 |
| 600.7201 | 65.33  | 13.58 | 10.01 | 12.43 | 12.47 | 1.42 |
| 600.7384 | 64.33  | 14.56 | 9.72  | 12.83 | 12.80 | 1.48 |
| 600.7601 | 58.1   | 18.59 | 17.73 | 19.00 | 18.92 | 0.33 |
| 600.7808 | 46.46  | 19.92 | 21.10 | 21.72 | 21.45 | 1.71 |
| 600.8003 | 50.02  | 15.43 | 16.12 | 15.67 | 15.88 | 0.74 |
| 600.8197 | 47.74  | 17.56 | 18.74 | 18.78 | 18.85 | 1.78 |
| 600.9212 | 55.45  | 10.64 | 14.62 | 9.35  | 9.78  | 0.69 |
| 600.9291 | 63.72  | 12.68 | 15.07 | 10.66 | 11.26 | 0.13 |
| 600.9459 | 59.7   | 11.44 | 16.44 | 12.92 | 12.09 | 1.23 |
| 601.0680 | 26.01  | 10.19 | 12.12 | 13.15 | 11.10 | 0.88 |
| 601.1084 | 17.83  | 17.34 | 17.05 | 15.96 | 15.57 | 0.45 |
| 601.2277 | 56.4   | 13.77 | 15.38 | 11.87 | 12.62 | 0.07 |
| 601.2767 | 163.21 | 13.60 | 10.62 | 11.25 | 11.89 | 1.19 |
| 601.3093 | 292.75 | 15.97 | 15.94 | 16.23 | 15.89 | 0.12 |
| 601.3310 | 186.99 | 18.46 | 18.19 | 17.94 | 17.89 | 0.54 |
| 601.4114 | 194.82 | 12.11 | 13.67 | 13.03 | 11.37 | 0.44 |
| 601.4613 | 268.97 | 15.32 | 13.84 | 14.59 | 15.56 | 0.61 |
| 601.7659 | 48.17  | 13.74 | 12.83 | 12.99 | 13.32 | 1.05 |
| 601.7879 | 51.87  | 15.79 | 17.24 | 17.85 | 17.61 | 1.67 |
| 601.8578 | 37.32  | 16.19 | 17.04 | 17.02 | 16.30 | 0.91 |
| 601.9425 | 50.96  | 12.50 | 15.38 | 16.18 | 14.62 | 1.69 |
| 602.1182 | 21.06  | 14.20 | 8.93  | 8.34  | 8.62  | 1.97 |
| 602.3037 | 204.55 | 17.12 | 16.27 | 16.75 | 17.36 | 0.41 |
| 602.3472 | 214.21 | 22.78 | 23.23 | 23.20 | 22.74 | 0.54 |
| 602.5164 | 236.29 | 15.26 | 14.02 | 13.93 | 15.18 | 0.51 |
| 602.6767 | 90.3   | 10.61 | 9.58  | 10.92 | 9.25  | 0.19 |
| 602.7182 | 58.05  | 19.49 | 19.74 | 20.78 | 20.46 | 0.84 |
| 602.7382 | 61.32  | 16.41 | 14.85 | 17.04 | 16.78 | 0.44 |
| 602.7578 | 52.28  | 17.22 | 15.19 | 17.49 | 17.37 | 0.86 |
| 602.7792 | 53.77  | 18.33 | 19.47 | 20.14 | 19.89 | 1.65 |
| 602.8092 | 38.64  | 13.59 | 13.55 | 13.76 | 13.61 | 0.02 |
| 602.8900 | 43.81  | 12.51 | 14.52 | 14.96 | 14.87 | 1.10 |
| 602.9143 | 39.5   | 12.73 | 14.17 | 13.77 | 13.99 | 0.49 |
| 603.1604 | 20.46  | 11.13 | 14.73 | 12.42 | 11.81 | 0.74 |
| 603.3056 | 203.62 | 15.45 | 13.12 | 13.98 | 15.21 | 1.02 |
| 603.3508 | 209.7  | 21.07 | 21.51 | 21.50 | 21.06 | 0.56 |
| 603.4411 | 220.13 | 18.14 | 14.33 | 15.33 | 16.30 | 1.65 |
| 603.7218 | 59.68  | 15.40 | 14.07 | 16.61 | 16.25 | 0.06 |
| 603.7828 | 54.26  | 13.80 | 14.56 | 15.62 | 15.26 | 0.87 |

|          |        |       |       |       |       |      |
|----------|--------|-------|-------|-------|-------|------|
| 603.8806 | 56.48  | 11.84 | 13.89 | 15.87 | 15.22 | 1.31 |
| 604.1033 | 22.01  | 16.96 | 18.66 | 18.61 | 18.01 | 1.28 |
| 604.1442 | 19.88  | 11.62 | 16.08 | 16.54 | 14.96 | 1.54 |
| 604.2279 | 208.82 | 12.48 | 13.02 | 12.97 | 12.57 | 0.27 |
| 604.2996 | 203.04 | 15.17 | 12.96 | 13.43 | 14.55 | 1.24 |
| 604.3259 | 191.51 | 17.87 | 17.16 | 17.48 | 17.24 | 0.53 |
| 604.3592 | 222.26 | 20.34 | 20.24 | 19.69 | 19.58 | 0.39 |
| 604.4453 | 217.32 | 15.53 | 11.40 | 12.03 | 13.46 | 1.22 |
| 604.5322 | 242.46 | 13.91 | 12.71 | 13.50 | 13.44 | 0.41 |
| 604.6959 | 82.71  | 12.62 | 11.68 | 12.27 | 11.77 | 0.40 |
| 604.7166 | 57.46  | 18.54 | 18.46 | 19.73 | 19.40 | 0.64 |
| 604.7356 | 57.69  | 15.45 | 13.66 | 16.42 | 16.16 | 0.32 |
| 604.7729 | 54.66  | 15.38 | 15.59 | 16.43 | 16.17 | 0.76 |
| 604.8120 | 38.25  | 13.06 | 13.65 | 13.52 | 13.77 | 0.39 |
| 604.8279 | 37.19  | 14.22 | 15.29 | 15.29 | 14.85 | 0.70 |
| 604.8518 | 43.55  | 17.30 | 18.92 | 18.71 | 18.87 | 1.46 |
| 604.8723 | 37.77  | 16.54 | 19.33 | 19.18 | 19.14 | 1.61 |
| 605.1058 | 21.16  | 10.32 | 12.40 | 12.18 | 10.99 | 0.71 |
| 605.3294 | 180.61 | 15.03 | 14.84 | 14.44 | 14.73 | 0.24 |
| 605.3643 | 223.12 | 18.26 | 16.46 | 15.28 | 16.37 | 1.40 |
| 605.4067 | 211.77 | 16.22 | 17.77 | 17.85 | 17.33 | 1.16 |
| 605.4562 | 236.72 | 18.61 | 17.72 | 18.32 | 19.04 | 0.62 |
| 605.7197 | 51.32  | 14.11 | 11.34 | 12.51 | 12.91 | 1.35 |
| 605.7335 | 60.2   | 13.99 | 11.98 | 15.66 | 14.82 | 0.13 |
| 605.7629 | 55.67  | 12.75 | 12.59 | 13.59 | 13.68 | 0.20 |
| 605.8202 | 42.55  | 11.84 | 13.75 | 13.34 | 13.63 | 1.18 |
| 605.8764 | 46.81  | 12.43 | 14.21 | 13.86 | 14.65 | 0.78 |
| 605.8960 | 59.5   | 12.34 | 10.94 | 12.44 | 13.32 | 0.41 |
| 605.9552 | 22.65  | 9.38  | 15.88 | 15.72 | 14.20 | 1.98 |
| 606.2248 | 144.48 | 16.03 | 15.47 | 16.77 | 16.56 | 0.07 |
| 606.2824 | 194.21 | 15.05 | 13.21 | 14.00 | 13.81 | 1.06 |
| 606.3033 | 197.98 | 19.61 | 19.13 | 19.26 | 19.31 | 0.82 |
| 606.3421 | 194.84 | 16.00 | 14.56 | 14.71 | 14.73 | 0.98 |
| 606.3770 | 219.36 | 16.29 | 14.54 | 14.63 | 14.53 | 0.88 |
| 606.4099 | 207.95 | 14.44 | 15.95 | 15.91 | 15.16 | 0.90 |
| 606.4598 | 237.22 | 16.21 | 15.49 | 16.40 | 17.00 | 0.14 |
| 606.7143 | 59.27  | 15.68 | 12.42 | 16.91 | 16.45 | 0.53 |
| 606.7393 | 56     | 17.02 | 16.04 | 16.92 | 17.10 | 0.59 |
| 606.7669 | 137.74 | 12.46 | 4.97  | 5.50  | 6.34  | 1.97 |
| 606.8136 | 38.84  | 20.49 | 22.52 | 22.35 | 22.25 | 1.89 |
| 607.0788 | 17.69  | 19.74 | 21.36 | 21.27 | 21.09 | 1.85 |
| 607.2285 | 145.3  | 11.76 | 10.07 | 13.02 | 12.39 | 0.10 |
| 607.3067 | 200.55 | 17.68 | 16.80 | 16.67 | 17.10 | 1.24 |
| 607.4743 | 238.56 | 22.40 | 21.56 | 21.95 | 21.71 | 0.90 |
| 607.7386 | 58.93  | 12.86 | 12.07 | 15.49 | 14.46 | 0.42 |
| 607.7787 | 48.95  | 13.96 | 17.03 | 16.64 | 16.43 | 1.83 |
| 607.8133 | 46.14  | 16.23 | 18.87 | 18.72 | 18.61 | 1.87 |
| 607.9782 | 24.6   | 11.02 | 12.84 | 13.49 | 12.37 | 1.04 |
| 608.0804 | 17.97  | 17.73 | 19.33 | 19.29 | 19.09 | 1.85 |
| 608.2403 | 177.51 | 15.91 | 16.77 | 17.18 | 16.13 | 0.88 |
| 608.3198 | 200.76 | 20.71 | 18.51 | 19.51 | 17.56 | 1.37 |
| 608.3576 | 205.43 | 18.44 | 18.75 | 18.66 | 19.39 | 0.29 |
| 608.3926 | 206.68 | 14.48 | 13.51 | 14.02 | 14.71 | 0.38 |
| 608.4773 | 238.75 | 21.11 | 20.26 | 20.65 | 20.45 | 0.89 |
| 608.5631 | 266.55 | 16.99 | 15.91 | 16.05 | 18.08 | 0.38 |
| 608.7268 | 75.71  | 14.14 | 11.27 | 12.68 | 12.69 | 1.08 |
| 608.7472 | 52.4   | 18.83 | 18.38 | 19.25 | 19.07 | 0.04 |
| 608.7809 | 53.39  | 13.54 | 15.98 | 14.85 | 14.87 | 1.00 |
| 608.8079 | 39.54  | 18.73 | 20.34 | 20.20 | 20.15 | 1.89 |
| 608.8618 | 43.16  | 13.91 | 15.32 | 15.58 | 16.18 | 1.10 |
| 608.9052 | 58.24  | 11.55 | 13.43 | 10.30 | 11.30 | 0.19 |
| 609.0829 | 25.9   | 13.64 | 15.81 | 15.72 | 15.61 | 1.64 |

|          |        |       |       |       |       |      |
|----------|--------|-------|-------|-------|-------|------|
| 609.2437 | 187.11 | 12.39 | 12.86 | 14.28 | 13.60 | 0.67 |
| 609.3228 | 196.83 | 18.66 | 17.38 | 18.02 | 16.35 | 0.99 |
| 609.3416 | 178.5  | 9.55  | 13.57 | 14.78 | 8.80  | 1.09 |
| 609.3615 | 198.82 | 16.48 | 17.18 | 17.15 | 17.62 | 0.59 |
| 609.4843 | 239.13 | 20.33 | 19.56 | 20.03 | 19.74 | 0.72 |
| 609.5103 | 248.36 | 19.58 | 18.47 | 18.42 | 18.98 | 0.87 |
| 609.7518 | 60.33  | 15.06 | 13.74 | 14.78 | 14.33 | 0.66 |
| 609.7835 | 47.13  | 12.02 | 14.55 | 14.19 | 14.77 | 1.49 |
| 609.8112 | 41.15  | 13.34 | 13.33 | 13.11 | 13.48 | 0.08 |
| 610.2558 | 171.36 | 13.93 | 13.41 | 13.79 | 12.94 | 0.29 |
| 610.3244 | 192.21 | 15.80 | 13.81 | 15.75 | 13.37 | 0.73 |
| 610.3719 | 198.88 | 16.56 | 14.30 | 15.13 | 15.09 | 1.20 |
| 610.4925 | 244.02 | 18.30 | 17.60 | 18.04 | 17.85 | 0.59 |
| 610.5142 | 249.36 | 17.91 | 16.51 | 16.16 | 16.97 | 0.93 |
| 610.6845 | 74.91  | 15.54 | 16.03 | 16.79 | 16.13 | 0.97 |
| 610.7051 | 73.09  | 12.81 | 11.06 | 12.86 | 12.40 | 0.50 |
| 610.7447 | 64.52  | 16.93 | 15.73 | 17.09 | 16.87 | 0.71 |
| 610.7627 | 47.68  | 19.97 | 20.49 | 20.85 | 20.53 | 1.36 |
| 610.7930 | 44.91  | 13.40 | 12.83 | 13.32 | 12.82 | 0.23 |
| 610.8018 | 41.72  | 14.17 | 13.06 | 13.14 | 13.55 | 1.25 |
| 610.8210 | 44.88  | 16.59 | 18.98 | 19.06 | 19.01 | 1.89 |
| 610.8382 | 37.18  | 11.38 | 11.73 | 12.68 | 12.61 | 0.44 |
| 610.8802 | 42.89  | 15.54 | 13.97 | 13.93 | 14.57 | 0.63 |
| 611.0016 | 24     | 10.00 | 12.68 | 12.05 | 12.18 | 1.18 |
| 611.1317 | 57.02  | 11.80 | 19.12 | 9.91  | 10.45 | 0.77 |
| 611.1459 | 21.44  | 21.38 | 25.05 | 24.89 | 24.85 | 1.74 |
| 611.2603 | 163.74 | 11.85 | 11.59 | 12.54 | 11.01 | 0.02 |
| 611.3220 | 172    | 11.94 | 11.88 | 11.58 | 10.68 | 0.15 |
| 611.3792 | 168.04 | 15.00 | 13.04 | 12.93 | 13.16 | 1.27 |
| 611.5046 | 256.77 | 17.23 | 14.23 | 16.20 | 16.02 | 0.90 |
| 611.5259 | 256.3  | 21.00 | 21.11 | 21.03 | 21.09 | 0.06 |
| 611.7660 | 56.89  | 15.44 | 15.18 | 16.09 | 15.81 | 0.23 |
| 611.8013 | 44.74  | 15.80 | 16.37 | 15.61 | 15.67 | 0.21 |
| 611.8267 | 44.36  | 13.47 | 13.65 | 13.59 | 14.13 | 0.21 |
| 612.0165 | 17.05  | 10.74 | 17.59 | 15.99 | 13.77 | 1.82 |
| 612.1345 | 57.2   | 9.77  | 14.98 | 8.80  | 9.15  | 0.86 |
| 612.3313 | 203.45 | 23.37 | 23.65 | 23.85 | 23.75 | 0.63 |
| 612.3888 | 224.6  | 14.36 | 18.92 | 17.64 | 18.84 | 1.45 |
| 612.5104 | 251.78 | 16.11 | 12.95 | 14.15 | 15.14 | 1.16 |
| 612.5300 | 256.96 | 19.44 | 19.65 | 19.61 | 19.57 | 0.13 |
| 612.6828 | 66.61  | 13.41 | 11.96 | 14.10 | 12.87 | 0.38 |
| 612.7003 | 71.17  | 16.05 | 16.10 | 17.05 | 16.58 | 0.72 |
| 612.7593 | 48.83  | 18.62 | 18.81 | 19.13 | 18.74 | 0.65 |
| 612.7989 | 44.3   | 13.59 | 15.56 | 14.41 | 15.05 | 0.98 |
| 612.8183 | 46.18  | 15.32 | 16.21 | 16.57 | 16.56 | 1.27 |
| 612.8384 | 44.4   | 17.89 | 18.44 | 18.23 | 18.60 | 0.60 |
| 612.8587 | 45.05  | 13.87 | 16.54 | 16.94 | 16.44 | 1.59 |
| 612.9443 | 65.22  | 8.10  | 14.71 | 9.01  | 8.01  | 1.13 |
| 612.9543 | 163.15 | 8.76  | 8.04  | 8.41  | 12.66 | 0.01 |
| 612.9830 | 60.03  | 12.15 | 17.97 | 10.11 | 11.07 | 0.64 |
| 612.9993 | 17.75  | 11.64 | 18.23 | 18.29 | 15.69 | 2.01 |
| 613.0340 | 21.86  | 9.41  | 14.90 | 14.67 | 13.09 | 1.39 |
| 613.1287 | 65.73  | 10.23 | 15.87 | 9.11  | 9.50  | 0.87 |
| 613.1415 | 18.34  | 19.54 | 21.65 | 21.66 | 21.68 | 1.79 |
| 613.3347 | 205.85 | 21.74 | 22.00 | 22.21 | 22.11 | 0.62 |
| 613.3931 | 210.32 | 11.42 | 15.73 | 14.47 | 16.13 | 1.21 |
| 613.5396 | 274.88 | 17.24 | 17.24 | 17.22 | 18.05 | 0.04 |
| 613.7198 | 52.32  | 12.83 | 9.78  | 12.78 | 12.54 | 0.89 |
| 613.7498 | 57.05  | 13.39 | 12.96 | 14.20 | 13.90 | 0.11 |
| 613.8042 | 45.45  | 12.83 | 13.26 | 12.70 | 13.53 | 0.18 |
| 613.9558 | 20.3   | 13.36 | 12.79 | 13.64 | 13.89 | 0.05 |
| 613.9863 | 61.03  | 13.50 | 13.70 | 11.58 | 12.28 | 0.87 |



|          |        |       |       |       |       |      |
|----------|--------|-------|-------|-------|-------|------|
| 614.1450 | 18.05  | 17.18 | 19.24 | 19.27 | 19.27 | 1.72 |
| 614.2681 | 181.85 | 15.14 | 12.22 | 12.96 | 13.79 | 1.25 |
| 614.3428 | 211.03 | 21.46 | 21.81 | 21.66 | 21.41 | 0.35 |
| 614.5241 | 264.1  | 17.03 | 16.94 | 17.82 | 17.36 | 0.23 |
| 614.6964 | 71.08  | 14.25 | 12.74 | 15.73 | 15.21 | 0.02 |
| 614.7258 | 58.75  | 14.20 | 11.84 | 15.02 | 14.22 | 0.50 |
| 614.7541 | 44.06  | 15.84 | 15.61 | 16.23 | 15.73 | 0.02 |
| 614.7763 | 49.63  | 15.24 | 13.20 | 13.40 | 14.04 | 1.12 |
| 614.7966 | 53.2   | 18.80 | 19.24 | 19.99 | 19.85 | 1.23 |
| 614.8360 | 48.47  | 14.80 | 14.00 | 14.12 | 14.96 | 0.40 |
| 614.8546 | 39.45  | 15.85 | 18.61 | 17.97 | 18.09 | 1.43 |
| 614.9225 | 65.05  | 13.09 | 15.42 | 11.14 | 11.85 | 0.15 |
| 614.9409 | 67.48  | 12.91 | 13.27 | 10.91 | 11.64 | 0.74 |
| 614.9866 | 60.38  | 12.96 | 14.71 | 10.98 | 11.68 | 0.06 |
| 615.1463 | 17.27  | 13.34 | 16.45 | 16.35 | 16.18 | 1.65 |
| 615.2342 | 155.66 | 14.71 | 14.88 | 15.76 | 14.70 | 0.42 |
| 615.3246 | 289.74 | 17.05 | 17.13 | 17.64 | 16.44 | 0.26 |
| 615.3381 | 206.89 | 14.63 | 13.62 | 14.95 | 14.88 | 0.24 |
| 615.3504 | 217.43 | 19.60 | 19.96 | 19.68 | 19.46 | 0.23 |
| 615.7259 | 59.77  | 12.87 | 10.38 | 14.63 | 13.14 | 0.25 |
| 615.7657 | 51.03  | 14.85 | 16.73 | 16.49 | 16.10 | 1.70 |
| 615.7993 | 46.31  | 14.13 | 13.14 | 14.04 | 14.12 | 0.57 |
| 615.8943 | 30.85  | 11.24 | 12.58 | 12.39 | 12.38 | 0.68 |
| 616.3259 | 219.07 | 14.35 | 17.17 | 16.94 | 14.73 | 1.34 |
| 616.3579 | 216.96 | 20.33 | 17.19 | 16.82 | 17.28 | 2.02 |
| 616.7103 | 71.87  | 14.67 | 11.25 | 13.98 | 14.29 | 1.09 |
| 616.7170 | 69.17  | 14.11 | 11.94 | 12.23 | 11.80 | 1.35 |
| 616.7338 | 60.54  | 16.84 | 15.21 | 17.23 | 17.05 | 0.57 |
| 616.7547 | 54.92  | 19.10 | 19.74 | 20.61 | 20.36 | 1.29 |
| 616.7746 | 54.38  | 15.46 | 15.65 | 16.18 | 16.03 | 0.77 |
| 616.7935 | 45.03  | 17.63 | 18.28 | 18.55 | 18.52 | 1.41 |
| 616.9179 | 57.6   | 10.96 | 15.28 | 12.27 | 12.06 | 1.16 |
| 617.2003 | 64.92  | 13.84 | 15.15 | 11.99 | 12.64 | 0.18 |
| 617.2739 | 98.5   | 14.46 | 11.33 | 13.11 | 13.10 | 0.83 |
| 617.3295 | 216.53 | 11.69 | 14.74 | 13.92 | 13.17 | 1.16 |
| 617.3635 | 207.05 | 18.36 | 13.66 | 13.77 | 14.21 | 1.65 |
| 617.7393 | 25.37  | 12.84 | 8.69  | 11.67 | 12.18 | 0.93 |
| 617.7613 | 54.44  | 14.94 | 15.72 | 16.69 | 16.47 | 1.11 |
| 617.8104 | 44.78  | 14.26 | 17.19 | 16.47 | 16.45 | 1.53 |
| 617.8317 | 38.93  | 16.16 | 16.69 | 16.92 | 16.09 | 0.47 |
| 617.9167 | 54.59  | 11.29 | 14.66 | 15.84 | 14.67 | 1.79 |
| 618.0867 | 18.33  | 17.87 | 19.55 | 19.52 | 19.09 | 1.70 |
| 618.3128 | 40.97  | 9.98  | 13.24 | 11.38 | 12.10 | 0.90 |
| 618.3418 | 178.97 | 13.24 | 12.56 | 13.03 | 13.36 | 0.21 |
| 618.3769 | 193.98 | 12.92 | 13.04 | 12.93 | 12.97 | 0.04 |
| 618.7125 | 65.25  | 15.01 | 12.47 | 16.25 | 15.77 | 0.40 |
| 618.7324 | 62.48  | 15.98 | 13.39 | 16.10 | 16.21 | 0.89 |
| 618.7527 | 54.11  | 17.73 | 18.33 | 19.29 | 19.00 | 1.25 |
| 618.7847 | 43.25  | 14.69 | 14.52 | 14.37 | 14.32 | 0.23 |
| 618.8126 | 44.13  | 11.94 | 15.19 | 14.09 | 15.10 | 1.11 |
| 618.8660 | 42.79  | 14.61 | 15.67 | 16.09 | 15.92 | 0.95 |
| 618.8880 | 43.13  | 15.16 | 17.98 | 17.85 | 17.97 | 1.48 |
| 619.0112 | 23.92  | 17.66 | 17.33 | 17.66 | 17.38 | 0.26 |
| 619.0899 | 17.39  | 14.80 | 16.88 | 16.89 | 15.97 | 1.41 |
| 619.2478 | 171.02 | 15.38 | 13.99 | 14.34 | 14.45 | 1.15 |
| 619.2895 | 136.65 | 23.07 | 22.86 | 22.87 | 22.49 | 0.33 |
| 619.5531 | 17.46  | 9.61  | 11.73 | 12.35 | 10.95 | 1.02 |
| 619.7568 | 56.94  | 14.04 | 12.70 | 15.00 | 14.79 | 0.13 |
| 619.7878 | 46.54  | 13.28 | 16.27 | 15.01 | 15.45 | 1.37 |
| 619.8590 | 43.52  | 12.17 | 13.34 | 13.14 | 13.74 | 0.57 |
| 619.9403 | 54.63  | 13.98 | 11.27 | 12.45 | 13.15 | 1.15 |
| 620.2592 | 194.99 | 12.31 | 13.44 | 13.86 | 13.10 | 0.67 |

|          |        |       |       |       |       |      |
|----------|--------|-------|-------|-------|-------|------|
| 620.2929 | 136.49 | 21.35 | 21.06 | 21.20 | 20.78 | 0.35 |
| 620.3193 | 201.6  | 17.95 | 16.38 | 16.49 | 16.69 | 1.41 |
| 620.3572 | 189.94 | 11.86 | 12.23 | 12.60 | 12.93 | 0.17 |
| 620.7117 | 54.83  | 13.84 | 10.89 | 12.54 | 12.40 | 1.47 |
| 620.7465 | 56.75  | 15.09 | 14.36 | 16.21 | 16.05 | 0.15 |
| 620.7855 | 46.65  | 13.10 | 15.83 | 14.81 | 15.28 | 1.30 |
| 620.8013 | 40.21  | 14.99 | 15.71 | 16.06 | 15.34 | 0.94 |
| 620.8257 | 45.54  | 18.20 | 19.32 | 19.17 | 19.28 | 1.55 |
| 620.8464 | 45.8   | 17.65 | 20.61 | 20.58 | 20.45 | 1.75 |
| 620.9294 | 65.85  | 13.32 | 15.16 | 11.34 | 12.03 | 0.02 |
| 621.2998 | 147.39 | 19.38 | 19.07 | 19.26 | 18.89 | 0.36 |
| 621.3278 | 193.08 | 17.80 | 16.32 | 13.91 | 15.86 | 1.12 |
| 621.4304 | 237.5  | 15.86 | 16.75 | 17.51 | 17.56 | 0.99 |
| 621.7369 | 58.23  | 14.01 | 11.06 | 14.68 | 14.01 | 0.63 |
| 621.7919 | 46.35  | 13.44 | 13.22 | 12.98 | 13.58 | 0.19 |
| 621.8309 | 43.28  | 13.43 | 14.64 | 14.10 | 14.71 | 0.62 |
| 621.8498 | 45.42  | 13.24 | 16.69 | 16.58 | 16.55 | 1.66 |
| 621.9323 | 37.73  | 12.47 | 16.47 | 16.59 | 15.29 | 2.17 |
| 622.2770 | 200.81 | 17.62 | 18.03 | 18.24 | 17.72 | 0.66 |
| 622.3006 | 162.57 | 17.59 | 16.04 | 16.07 | 16.68 | 1.54 |
| 622.3343 | 204.4  | 20.28 | 17.76 | 18.26 | 16.60 | 1.61 |
| 622.3732 | 189.02 | 9.88  | 12.46 | 12.71 | 12.14 | 0.76 |
| 622.4337 | 237.45 | 13.22 | 13.09 | 14.25 | 14.38 | 0.32 |
| 622.7196 | 58.8   | 15.82 | 12.00 | 16.11 | 16.34 | 0.80 |
| 622.7412 | 58.75  | 12.94 | 7.17  | 10.02 | 9.65  | 1.25 |
| 622.7626 | 65.25  | 15.26 | 11.16 | 14.80 | 14.50 | 1.01 |
| 622.7840 | 41.72  | 20.86 | 22.50 | 22.49 | 22.32 | 1.93 |
| 622.8242 | 44.99  | 15.73 | 14.64 | 16.17 | 16.54 | 0.16 |
| 622.8446 | 45.31  | 14.21 | 16.72 | 17.33 | 17.15 | 1.42 |
| 622.9464 | 62.71  | 11.17 | 13.99 | 10.00 | 10.22 | 0.44 |
| 623.2610 | 155.74 | 18.14 | 17.63 | 18.33 | 18.34 | 0.20 |
| 623.2803 | 201.14 | 15.27 | 14.92 | 15.40 | 14.85 | 0.15 |
| 623.3176 | 176.21 | 15.25 | 15.21 | 16.52 | 14.29 | 0.20 |
| 623.3388 | 203.39 | 17.83 | 13.87 | 14.71 | 11.95 | 1.44 |
| 623.4171 | 183.49 | 13.04 | 13.41 | 12.44 | 11.37 | 0.10 |
| 623.7523 | 54.39  | 14.48 | 16.00 | 16.40 | 15.91 | 1.52 |
| 623.7871 | 48.87  | 17.02 | 18.82 | 18.87 | 18.68 | 1.99 |
| 623.9470 | 48.01  | 11.12 | 12.82 | 12.36 | 11.19 | 1.00 |
| 624.0669 | 22.96  | 17.32 | 17.31 | 16.62 | 16.34 | 0.22 |
| 624.2642 | 164.33 | 16.44 | 15.71 | 16.50 | 16.52 | 0.41 |
| 624.2930 | 214.82 | 19.01 | 16.08 | 16.54 | 15.21 | 1.40 |
| 624.3157 | 179.7  | 13.47 | 16.46 | 17.21 | 13.27 | 1.27 |
| 624.3529 | 199.4  | 13.49 | 14.65 | 15.39 | 14.26 | 0.64 |
| 624.3891 | 194.45 | 13.87 | 13.54 | 13.66 | 13.07 | 0.19 |
| 624.4251 | 189.38 | 14.34 | 13.58 | 13.94 | 13.08 | 0.50 |
| 624.7210 | 54.43  | 18.92 | 18.67 | 19.69 | 19.37 | 0.44 |
| 624.7529 | 53.53  | 14.54 | 15.10 | 15.48 | 15.09 | 0.75 |
| 624.7820 | 47.64  | 19.40 | 20.68 | 20.75 | 20.58 | 1.89 |
| 624.8168 | 37.7   | 12.89 | 13.04 | 12.92 | 13.00 | 0.07 |
| 624.8353 | 44.6   | 14.83 | 16.24 | 16.64 | 16.76 | 1.38 |
| 624.9576 | 145.71 | 8.26  | 7.98  | 8.82  | 11.89 | 0.26 |
| 625.0686 | 24.03  | 14.15 | 13.49 | 14.09 | 13.91 | 0.17 |
| 625.1878 | 54.01  | 11.61 | 18.86 | 11.31 | 11.03 | 0.99 |
| 625.2742 | 161.03 | 16.17 | 15.33 | 15.67 | 15.37 | 0.84 |
| 625.2965 | 198.53 | 16.69 | 14.00 | 14.42 | 13.46 | 1.67 |
| 625.3202 | 168.2  | 9.45  | 13.63 | 14.64 | 10.33 | 1.46 |
| 625.3365 | 175.73 | 14.50 | 11.04 | 13.78 | 13.10 | 1.14 |
| 625.7249 | 62.87  | 14.91 | 12.38 | 16.11 | 15.58 | 0.40 |
| 625.7572 | 53.44  | 12.83 | 14.09 | 13.77 | 14.06 | 0.81 |
| 625.7847 | 50.11  | 14.66 | 15.78 | 15.75 | 15.64 | 1.63 |
| 625.7989 | 45.13  | 12.38 | 17.53 | 16.76 | 16.87 | 1.71 |
| 625.8760 | 35.5   | 11.03 | 13.23 | 12.52 | 12.34 | 0.64 |

|          |        |       |       |       |       |      |
|----------|--------|-------|-------|-------|-------|------|
| 626.0849 | 24.21  | 16.05 | 15.83 | 16.32 | 15.67 | 0.03 |
| 626.1891 | 63.81  | 11.24 | 13.51 | 9.71  | 10.33 | 0.27 |
| 626.3470 | 207.61 | 21.14 | 21.25 | 21.54 | 21.21 | 0.34 |
| 626.6581 | 72.05  | 11.60 | 10.89 | 11.24 | 11.01 | 0.41 |
| 626.6821 | 67.96  | 10.49 | 10.35 | 11.90 | 10.74 | 0.18 |
| 626.7190 | 64.9   | 17.13 | 16.53 | 17.81 | 17.44 | 0.01 |
| 626.7365 | 54.13  | 19.59 | 19.83 | 20.51 | 20.22 | 1.18 |
| 626.7784 | 45.64  | 14.81 | 14.16 | 14.40 | 14.50 | 0.85 |
| 626.7952 | 46.34  | 17.00 | 18.90 | 19.04 | 18.97 | 2.00 |
| 626.8121 | 38.52  | 13.12 | 13.95 | 14.69 | 14.70 | 0.84 |
| 626.8305 | 36.63  | 12.67 | 11.90 | 12.68 | 12.50 | 0.22 |
| 626.8541 | 43.7   | 15.56 | 14.47 | 14.10 | 15.06 | 0.59 |
| 626.9996 | 52.76  | 12.52 | 13.32 | 10.53 | 11.19 | 0.49 |
| 627.1239 | 67.66  | 11.84 | 12.76 | 10.00 | 10.58 | 0.37 |
| 627.2927 | 170.08 | 13.29 | 11.26 | 11.14 | 11.53 | 1.04 |
| 627.3504 | 203.49 | 19.55 | 19.59 | 19.94 | 19.59 | 0.27 |
| 627.7389 | 60.27  | 15.32 | 13.42 | 16.19 | 15.92 | 0.35 |
| 627.7764 | 39.83  | 14.91 | 16.03 | 15.51 | 15.38 | 0.93 |
| 627.8012 | 39.76  | 13.92 | 13.10 | 13.08 | 13.74 | 0.79 |
| 628.1768 | 18.48  | 10.94 | 13.39 | 13.17 | 11.96 | 1.28 |
| 628.3261 | 185.5  | 16.24 | 16.44 | 16.40 | 16.55 | 0.19 |
| 628.3584 | 216.53 | 19.51 | 19.65 | 19.70 | 19.17 | 0.11 |
| 628.6754 | 61.71  | 13.28 | 11.13 | 12.27 | 12.44 | 1.19 |
| 628.7334 | 46.91  | 18.57 | 18.25 | 19.18 | 18.99 | 0.24 |
| 628.7704 | 37.48  | 13.77 | 14.18 | 13.37 | 14.01 | 0.07 |
| 628.7922 | 47.1   | 15.61 | 16.51 | 16.89 | 16.76 | 1.53 |
| 628.8126 | 43.32  | 17.97 | 18.93 | 18.47 | 18.85 | 1.01 |
| 628.8327 | 47.33  | 14.18 | 15.87 | 16.50 | 16.01 | 1.36 |
| 628.8405 | 37.24  | 13.00 | 13.38 | 12.81 | 12.57 | 0.04 |
| 628.9543 | 55.55  | 11.64 | 18.80 | 11.31 | 11.08 | 0.97 |
| 629.1358 | 18.06  | 17.32 | 18.44 | 18.56 | 18.38 | 1.26 |
| 629.3292 | 170.76 | 13.78 | 13.81 | 14.15 | 14.28 | 0.14 |
| 629.3663 | 215.18 | 17.65 | 17.87 | 17.68 | 17.13 | 0.06 |
| 629.4556 | 234.01 | 19.60 | 17.95 | 18.74 | 19.47 | 1.13 |
| 629.7241 | 57.95  | 13.48 | 10.63 | 12.98 | 12.52 | 1.02 |
| 629.7379 | 61.04  | 14.04 | 11.41 | 12.71 | 13.14 | 1.42 |
| 629.7767 | 48.91  | 12.99 | 12.85 | 12.93 | 13.12 | 0.07 |
| 629.9654 | 60.3   | 11.01 | 15.30 | 10.39 | 10.61 | 0.81 |
| 630.1187 | 18.18  | 14.48 | 14.80 | 13.30 | 13.81 | 0.22 |
| 630.1375 | 17.8   | 14.61 | 15.67 | 15.60 | 16.07 | 0.95 |
| 630.2432 | 173.39 | 12.74 | 11.69 | 13.06 | 13.01 | 0.18 |
| 630.3029 | 190.71 | 15.34 | 14.83 | 14.92 | 15.07 | 0.42 |
| 630.3420 | 199.99 | 14.84 | 14.76 | 14.22 | 14.20 | 0.21 |
| 630.3792 | 233.99 | 18.95 | 14.13 | 11.08 | 14.80 | 1.72 |
| 630.4592 | 233.99 | 17.95 | 15.97 | 16.94 | 17.86 | 1.01 |
| 630.6698 | 70.07  | 12.45 | 10.14 | 11.88 | 12.08 | 0.83 |
| 630.7296 | 55.56  | 16.14 | 14.78 | 15.97 | 16.13 | 0.79 |
| 630.7534 | 47.25  | 15.17 | 11.04 | 12.05 | 12.78 | 1.24 |
| 630.7707 | 54.96  | 17.84 | 17.88 | 18.94 | 18.78 | 0.78 |
| 630.7898 | 51.74  | 12.48 | 12.72 | 13.51 | 13.66 | 0.35 |
| 630.8104 | 49.27  | 15.28 | 14.48 | 14.34 | 15.18 | 0.56 |
| 630.8286 | 41.48  | 17.10 | 19.99 | 19.54 | 19.55 | 1.61 |
| 631.1404 | 22.55  | 18.26 | 18.77 | 18.61 | 17.90 | 0.22 |
| 631.3455 | 182.89 | 8.71  | 12.20 | 10.88 | 9.28  | 0.77 |
| 631.3828 | 224.53 | 16.84 | 11.82 | 11.14 | 11.86 | 2.09 |
| 631.3908 | 134.57 | 13.87 | 9.15  | 9.46  | 10.70 | 1.34 |
| 631.4732 | 232.83 | 19.57 | 18.96 | 19.81 | 19.83 | 0.25 |
| 631.7394 | 56.16  | 14.87 | 15.29 | 16.52 | 16.14 | 1.12 |
| 631.7728 | 55.01  | 13.69 | 13.10 | 13.60 | 13.60 | 0.27 |
| 631.8316 | 42.13  | 12.48 | 15.12 | 14.10 | 14.37 | 0.94 |
| 631.8677 | 36.77  | 13.91 | 15.35 | 15.77 | 14.70 | 0.93 |
| 632.1432 | 23.21  | 15.05 | 14.93 | 14.30 | 13.79 | 0.22 |

|          |        |       |       |       |       |      |
|----------|--------|-------|-------|-------|-------|------|
| 632.1737 | 77.39  | 9.27  | 5.11  | 5.42  | 13.85 | 0.61 |
| 632.3189 | 207.49 | 19.87 | 20.42 | 20.14 | 20.38 | 0.68 |
| 632.3576 | 204.84 | 17.53 | 18.82 | 19.02 | 18.44 | 1.28 |
| 632.4769 | 231.56 | 17.87 | 17.57 | 18.53 | 18.53 | 0.19 |
| 632.6866 | 71.11  | 13.82 | 11.54 | 12.89 | 12.71 | 0.96 |
| 632.7091 | 65.35  | 12.58 | 7.45  | 13.06 | 13.13 | 0.77 |
| 632.7288 | 55.73  | 17.27 | 17.20 | 18.59 | 18.31 | 0.65 |
| 632.7660 | 44.87  | 17.57 | 17.29 | 17.92 | 17.86 | 0.08 |
| 632.8196 | 40.78  | 14.92 | 16.86 | 16.49 | 16.35 | 1.08 |
| 632.8999 | 44.99  | 13.86 | 12.79 | 13.45 | 13.66 | 0.41 |
| 633.1100 | 66.75  | 11.64 | 13.30 | 9.69  | 10.52 | 0.06 |
| 633.1269 | 129.24 | 10.40 | 13.15 | 13.15 | 13.76 | 1.22 |
| 633.1271 | 29.2   | 17.12 | 19.06 | 18.66 | 19.22 | 1.43 |
| 633.3222 | 212.29 | 17.97 | 18.43 | 18.09 | 18.40 | 0.40 |
| 633.3610 | 207.03 | 15.52 | 16.54 | 16.83 | 16.24 | 0.88 |
| 633.5105 | 240.04 | 19.85 | 20.00 | 20.16 | 20.09 | 0.14 |
| 633.7173 | 62     | 12.63 | 10.42 | 12.95 | 11.95 | 0.77 |
| 633.7387 | 57.37  | 14.18 | 13.29 | 14.90 | 14.72 | 0.07 |
| 633.7856 | 46.57  | 14.42 | 17.86 | 17.37 | 17.25 | 1.84 |
| 633.8066 | 40.1   | 15.93 | 15.75 | 16.08 | 15.20 | 0.09 |
| 633.8897 | 54.49  | 11.84 | 12.45 | 14.65 | 14.07 | 0.97 |
| 634.1305 | 20.63  | 13.38 | 15.50 | 15.12 | 16.59 | 0.99 |
| 634.2872 | 47.16  | 12.64 | 13.45 | 13.06 | 13.11 | 0.72 |
| 634.3333 | 200.31 | 17.02 | 15.78 | 16.68 | 15.11 | 0.80 |
| 634.3732 | 191.47 | 12.00 | 13.35 | 14.69 | 13.03 | 0.66 |
| 634.4930 | 242.72 | 16.76 | 16.88 | 17.61 | 17.30 | 0.35 |
| 634.5145 | 240.24 | 18.03 | 18.53 | 18.64 | 18.63 | 0.35 |
| 634.7056 | 73.83  | 14.52 | 11.92 | 14.01 | 13.29 | 1.06 |
| 634.7272 | 56.32  | 16.08 | 15.87 | 17.30 | 17.02 | 0.51 |
| 634.7554 | 50.03  | 14.80 | 13.64 | 14.55 | 14.31 | 0.74 |
| 634.7644 | 47.74  | 13.54 | 12.51 | 12.93 | 13.45 | 0.48 |
| 634.7858 | 46.47  | 13.74 | 16.82 | 16.25 | 16.24 | 1.68 |
| 634.8173 | 35.82  | 11.98 | 12.63 | 13.17 | 12.70 | 0.48 |
| 634.8410 | 43.43  | 15.34 | 15.88 | 15.93 | 16.09 | 0.48 |
| 634.8620 | 39.47  | 16.77 | 19.24 | 19.29 | 19.25 | 1.65 |
| 634.9654 | 59.33  | 11.65 | 15.15 | 9.85  | 10.57 | 0.43 |
| 635.0147 | 23.4   | 10.93 | 11.92 | 12.23 | 11.69 | 1.04 |
| 635.2223 | 163.74 | 13.37 | 13.24 | 14.11 | 12.84 | 0.11 |
| 635.3380 | 190.11 | 14.58 | 12.73 | 13.92 | 12.29 | 0.74 |
| 635.5252 | 249.47 | 20.18 | 19.52 | 19.49 | 19.82 | 0.48 |
| 635.7617 | 50.83  | 12.34 | 15.32 | 14.30 | 14.06 | 1.23 |
| 635.7895 | 39.21  | 12.42 | 13.01 | 12.75 | 13.65 | 0.65 |
| 635.8361 | 39.91  | 13.76 | 14.77 | 14.11 | 14.85 | 0.52 |
| 635.8637 | 38.57  | 12.68 | 12.43 | 12.41 | 12.61 | 0.21 |
| 635.9140 | 60.16  | 15.60 | 12.22 | 15.71 | 16.00 | 0.87 |
| 636.2927 | 200.33 | 15.54 | 14.66 | 15.17 | 14.60 | 0.53 |
| 636.3507 | 212.32 | 18.53 | 19.93 | 19.02 | 19.71 | 0.92 |
| 636.3888 | 193.27 | 12.98 | 14.95 | 15.24 | 12.97 | 0.82 |
| 636.5257 | 250.54 | 18.80 | 18.01 | 18.10 | 18.48 | 0.50 |
| 636.7252 | 49.73  | 14.37 | 11.40 | 12.51 | 13.02 | 1.51 |
| 636.7600 | 48.65  | 13.99 | 15.21 | 14.10 | 14.77 | 0.56 |
| 636.7756 | 42.82  | 15.11 | 15.64 | 15.96 | 15.42 | 0.89 |
| 636.7995 | 48.83  | 18.56 | 19.19 | 19.20 | 19.24 | 1.30 |
| 636.8204 | 47.14  | 18.55 | 21.16 | 21.24 | 21.03 | 1.88 |
| 636.8379 | 19.31  | 12.33 | 9.42  | 8.92  | 15.83 | 0.69 |
| 636.8592 | 41.74  | 14.16 | 15.65 | 15.13 | 15.99 | 0.84 |
| 636.8993 | 64.94  | 10.67 | 15.56 | 9.26  | 9.69  | 0.72 |
| 636.9089 | 58.78  | 13.39 | 15.06 | 11.42 | 12.12 | 0.08 |
| 637.2769 | 165.54 | 14.14 | 11.59 | 11.72 | 12.66 | 1.50 |
| 637.3539 | 206.48 | 16.85 | 17.51 | 16.40 | 17.89 | 0.24 |
| 637.3729 | 185.75 | 13.33 | 15.74 | 16.40 | 14.02 | 1.18 |
| 637.3951 | 176    | 11.90 | 12.32 | 12.70 | 10.89 | 0.20 |

|          |        |       |       |       |       |      |
|----------|--------|-------|-------|-------|-------|------|
| 637.5397 | 262.81 | 19.05 | 19.02 | 18.91 | 19.33 | 0.02 |
| 637.7678 | 53.5   | 12.57 | 12.66 | 12.95 | 13.22 | 0.18 |
| 637.8053 | 45.44  | 14.82 | 16.20 | 15.32 | 15.99 | 0.93 |
| 637.8241 | 41.07  | 14.45 | 17.27 | 17.32 | 17.16 | 1.77 |
| 637.9065 | 33.75  | 11.52 | 13.43 | 13.66 | 13.06 | 1.06 |
| 638.3087 | 201.83 | 18.16 | 13.19 | 14.99 | 11.70 | 1.57 |
| 638.3327 | 176.82 | 12.38 | 15.22 | 15.84 | 11.28 | 0.97 |
| 638.3693 | 192.62 | 11.65 | 15.04 | 16.02 | 12.50 | 1.06 |
| 638.5455 | 265.53 | 16.48 | 16.55 | 16.66 | 17.17 | 0.09 |
| 638.7330 | 69.37  | 15.98 | 13.92 | 16.07 | 15.88 | 0.95 |
| 638.7579 | 52.13  | 20.93 | 22.04 | 22.35 | 22.12 | 1.93 |
| 638.7783 | 42.58  | 14.05 | 13.78 | 13.19 | 13.76 | 0.40 |
| 638.7978 | 49.19  | 16.54 | 17.01 | 17.02 | 17.14 | 0.87 |
| 638.8194 | 46.18  | 15.87 | 18.64 | 18.83 | 18.62 | 1.81 |
| 638.9003 | 69.12  | 11.90 | 12.62 | 9.99  | 10.56 | 0.50 |
| 638.9220 | 63.51  | 11.33 | 13.89 | 10.38 | 9.78  | 0.30 |
| 639.2348 | 155.67 | 15.87 | 16.60 | 17.51 | 16.76 | 1.19 |
| 639.2769 | 155.29 | 15.92 | 15.45 | 15.77 | 15.48 | 0.27 |
| 639.3119 | 222.54 | 15.08 | 8.12  | 8.79  | 7.40  | 1.79 |
| 639.5570 | 282.15 | 18.27 | 18.41 | 18.61 | 18.95 | 0.27 |
| 639.7265 | 57.9   | 13.76 | 14.31 | 16.43 | 15.91 | 0.85 |
| 639.7611 | 52.64  | 17.07 | 18.24 | 18.66 | 18.38 | 1.82 |
| 639.8215 | 45.81  | 13.10 | 14.00 | 13.96 | 14.18 | 0.70 |
| 639.9197 | 42.88  | 12.16 | 13.19 | 13.13 | 12.56 | 0.81 |
| 640.0718 | 22.44  | 13.15 | 15.66 | 15.22 | 14.37 | 1.03 |
| 640.2383 | 155.69 | 12.83 | 13.58 | 15.36 | 14.44 | 0.94 |
| 640.2808 | 155.95 | 12.96 | 11.50 | 12.06 | 11.79 | 0.81 |
| 640.3124 | 168.48 | 8.75  | 14.35 | 15.14 | 8.03  | 1.17 |
| 640.3246 | 214.14 | 11.90 | 14.75 | 14.28 | 12.54 | 1.10 |
| 640.3622 | 212.41 | 15.38 | 13.23 | 12.67 | 12.64 | 0.93 |
| 640.5608 | 282.06 | 16.26 | 16.09 | 16.60 | 17.12 | 0.09 |
| 640.6950 | 64.1   | 17.94 | 17.88 | 19.06 | 18.66 | 0.65 |
| 640.7127 | 73.64  | 13.71 | 11.52 | 12.79 | 12.65 | 1.34 |
| 640.7276 | 62.03  | 15.06 | 13.73 | 16.40 | 15.78 | 0.03 |
| 640.7559 | 52.23  | 19.65 | 20.53 | 20.92 | 20.72 | 1.86 |
| 640.7800 | 49.99  | 12.43 | 12.22 | 12.88 | 13.19 | 0.10 |
| 640.8048 | 45.07  | 15.68 | 16.30 | 16.62 | 16.78 | 0.96 |
| 640.9937 | 24.9   | 15.79 | 14.59 | 14.58 | 14.60 | 0.63 |
| 641.1637 | 63.81  | 15.60 | 19.71 | 14.68 | 14.92 | 0.82 |
| 641.2507 | 162.25 | 12.53 | 12.08 | 13.57 | 11.71 | 0.05 |
| 641.5725 | 294.5  | 13.56 | 15.66 | 16.53 | 15.62 | 1.14 |
| 641.5771 | 20.3   | 8.28  | 13.16 | 13.74 | 13.10 | 1.57 |
| 641.6963 | 65.7   | 13.10 | 10.88 | 12.21 | 11.98 | 1.26 |
| 641.7299 | 58.13  | 13.36 | 12.54 | 15.33 | 14.84 | 0.30 |
| 641.7592 | 54.76  | 15.12 | 15.19 | 15.93 | 15.82 | 0.82 |
| 641.7732 | 47.58  | 14.58 | 17.53 | 17.15 | 16.96 | 1.90 |
| 641.8510 | 37.53  | 12.19 | 13.85 | 13.53 | 13.17 | 0.65 |
| 642.1184 | 23.1   | 15.63 | 13.00 | 13.98 | 14.95 | 0.85 |
| 642.1668 | 63.92  | 14.74 | 17.56 | 13.38 | 13.81 | 0.47 |
| 642.5747 | 295.69 | 10.67 | 11.51 | 12.83 | 11.61 | 0.60 |
| 642.6846 | 74.12  | 10.26 | 12.74 | 12.58 | 11.75 | 1.15 |
| 642.6930 | 65.7   | 16.43 | 16.11 | 17.44 | 17.02 | 0.40 |
| 642.7107 | 59.19  | 18.51 | 18.65 | 19.65 | 19.30 | 0.87 |
| 642.7531 | 54.68  | 16.28 | 16.53 | 17.07 | 16.87 | 1.00 |
| 642.7695 | 42.8   | 16.49 | 18.19 | 18.37 | 18.35 | 1.84 |
| 642.7863 | 33.77  | 13.59 | 13.48 | 13.27 | 13.67 | 0.22 |
| 642.8059 | 33.01  | 13.05 | 12.34 | 12.79 | 13.11 | 0.29 |
| 642.8280 | 40.37  | 15.11 | 13.74 | 13.43 | 14.28 | 0.88 |
| 642.8493 | 40.67  | 16.05 | 19.19 | 18.83 | 18.92 | 1.55 |
| 642.9747 | 61.82  | 11.18 | 13.97 | 9.69  | 10.21 | 0.42 |
| 643.1607 | 64.06  | 13.26 | 14.56 | 11.29 | 11.98 | 0.23 |
| 643.2456 | 153.46 | 12.40 | 10.72 | 10.81 | 11.24 | 1.13 |

|          |        |       |       |       |       |      |
|----------|--------|-------|-------|-------|-------|------|
| 643.2896 | 151.76 | 19.38 | 17.78 | 18.81 | 18.13 | 1.19 |
| 643.3197 | 171.91 | 15.83 | 11.61 | 10.17 | 11.25 | 1.38 |
| 643.7141 | 63.03  | 14.14 | 10.43 | 14.87 | 13.94 | 0.85 |
| 643.7487 | 52.98  | 13.97 | 14.16 | 13.58 | 13.93 | 0.05 |
| 643.7728 | 47.7   | 14.25 | 15.55 | 15.20 | 15.37 | 1.35 |
| 643.8186 | 42.56  | 12.62 | 15.39 | 14.10 | 14.39 | 0.77 |
| 644.2931 | 144.01 | 17.77 | 15.55 | 16.81 | 16.46 | 1.34 |
| 644.3214 | 182.38 | 15.32 | 11.64 | 12.37 | 12.24 | 1.54 |
| 644.3947 | 192.54 | 12.42 | 13.21 | 12.86 | 13.21 | 0.54 |
| 644.7076 | 58.22  | 17.87 | 17.54 | 18.76 | 18.42 | 0.39 |
| 644.7482 | 49.16  | 13.87 | 13.06 | 13.35 | 13.55 | 0.86 |
| 644.7663 | 50.86  | 15.45 | 15.76 | 16.26 | 16.30 | 0.84 |
| 644.7872 | 43.18  | 17.95 | 19.37 | 18.88 | 19.07 | 1.49 |
| 644.8133 | 48.33  | 15.02 | 14.96 | 15.46 | 15.74 | 0.19 |
| 644.8449 | 42.25  | 13.86 | 17.06 | 16.52 | 16.92 | 1.38 |
| 644.9308 | 52.7   | 11.19 | 16.41 | 11.49 | 11.19 | 1.08 |
| 644.9528 | 61.83  | 11.43 | 12.77 | 9.77  | 10.31 | 0.11 |
| 644.9608 | 169.55 | 10.95 | 10.80 | 10.87 | 11.06 | 0.06 |
| 645.2432 | 156.64 | 14.40 | 11.38 | 12.60 | 13.35 | 1.41 |
| 645.2647 | 167.53 | 12.54 | 10.76 | 10.30 | 11.20 | 1.34 |
| 645.2927 | 155.58 | 11.90 | 10.96 | 11.53 | 11.95 | 0.38 |
| 645.3030 | 151.78 | 18.65 | 18.03 | 18.12 | 17.81 | 0.77 |
| 645.4297 | 234.06 | 17.98 | 17.04 | 17.95 | 18.27 | 0.39 |
| 645.4509 | 291.88 | 17.79 | 20.10 | 19.44 | 19.48 | 0.99 |
| 645.7127 | 62.03  | 14.11 | 10.87 | 12.93 | 12.82 | 1.42 |
| 645.7924 | 45.06  | 14.69 | 16.55 | 15.63 | 16.04 | 1.13 |
| 645.9344 | 62.18  | 12.21 | 12.68 | 10.41 | 11.09 | 0.51 |
| 646.0493 | 25.08  | 16.04 | 13.81 | 13.19 | 12.93 | 1.09 |
| 646.0730 | 17.39  | 13.16 | 15.61 | 15.45 | 15.00 | 1.33 |
| 646.2341 | 104.17 | 10.28 | 13.42 | 9.75  | 8.95  | 0.51 |
| 646.2768 | 190.1  | 8.55  | 11.47 | 12.19 | 10.20 | 1.10 |
| 646.2922 | 197.97 | 12.75 | 12.07 | 11.00 | 12.12 | 0.44 |
| 646.3077 | 162.31 | 16.91 | 16.21 | 16.33 | 15.95 | 0.80 |
| 646.3347 | 207.93 | 18.59 | 18.97 | 18.79 | 18.86 | 0.46 |
| 646.4333 | 234.46 | 15.77 | 13.13 | 15.88 | 16.18 | 0.51 |
| 646.4541 | 290.75 | 16.32 | 18.29 | 17.73 | 17.49 | 0.78 |
| 646.6970 | 49.02  | 13.99 | 11.98 | 12.99 | 13.27 | 1.10 |
| 646.7044 | 59.25  | 15.82 | 13.03 | 15.80 | 15.81 | 0.97 |
| 646.7245 | 57.53  | 15.01 | 9.02  | 13.23 | 13.12 | 1.24 |
| 646.7443 | 53.87  | 15.96 | 15.39 | 16.90 | 16.74 | 0.20 |
| 646.7854 | 42.86  | 15.04 | 14.19 | 14.22 | 14.76 | 0.87 |
| 646.8028 | 44.07  | 18.28 | 20.60 | 20.26 | 20.21 | 1.87 |
| 646.9222 | 51.43  | 11.81 | 14.57 | 9.70  | 10.75 | 0.19 |
| 646.9335 | 61.93  | 13.44 | 14.08 | 11.50 | 12.19 | 0.57 |
| 647.0747 | 21.62  | 11.91 | 13.59 | 13.49 | 13.23 | 1.32 |
| 647.3378 | 210.3  | 16.58 | 16.35 | 16.17 | 16.53 | 0.27 |
| 647.4461 | 242.57 | 14.39 | 13.17 | 14.23 | 13.87 | 0.43 |
| 647.7146 | 59.59  | 13.96 | 11.84 | 14.60 | 14.25 | 0.51 |
| 647.8048 | 45.05  | 13.50 | 16.69 | 16.04 | 16.20 | 1.61 |
| 647.8429 | 38.48  | 14.22 | 14.34 | 14.57 | 13.74 | 0.11 |
| 648.0676 | 24.65  | 12.89 | 11.90 | 12.00 | 11.91 | 0.52 |
| 648.2929 | 212.08 | 18.03 | 19.63 | 19.48 | 19.12 | 1.49 |
| 648.3204 | 169.81 | 16.13 | 13.98 | 14.36 | 14.00 | 1.47 |
| 648.3485 | 204.14 | 16.42 | 14.31 | 14.81 | 11.68 | 0.75 |
| 648.6591 | 68.51  | 12.80 | 11.61 | 11.94 | 12.16 | 0.87 |
| 648.7168 | 52.87  | 13.47 | 11.14 | 11.92 | 12.45 | 1.50 |
| 648.7245 | 59.13  | 14.87 | 13.01 | 14.76 | 14.51 | 1.07 |
| 648.7406 | 57.02  | 17.48 | 16.26 | 17.12 | 17.21 | 1.12 |
| 648.7963 | 42.19  | 16.43 | 18.34 | 18.25 | 18.11 | 1.72 |
| 648.8777 | 45.68  | 14.47 | 15.32 | 15.57 | 15.95 | 0.57 |
| 649.0107 | 16.78  | 8.07  | 14.60 | 13.52 | 12.51 | 1.89 |
| 649.0187 | 19.18  | 10.24 | 12.53 | 11.60 | 11.50 | 1.56 |

|          |        |       |       |       |       |      |
|----------|--------|-------|-------|-------|-------|------|
| 649.0894 | 39.88  | 14.15 | 14.42 | 13.22 | 14.93 | 0.07 |
| 649.1053 | 101.8  | 11.46 | 12.82 | 12.92 | 13.25 | 0.67 |
| 649.2961 | 210.43 | 15.80 | 17.41 | 17.29 | 16.90 | 1.25 |
| 649.5059 | 294.46 | 11.46 | 14.37 | 11.76 | 13.18 | 0.74 |
| 649.7172 | 59.36  | 13.57 | 11.99 | 15.15 | 14.18 | 0.05 |
| 649.7593 | 49.65  | 14.25 | 17.39 | 17.14 | 16.89 | 1.92 |
| 649.7785 | 42.87  | 14.84 | 12.88 | 12.95 | 12.96 | 1.09 |
| 650.2628 | 34.62  | 11.74 | 13.05 | 11.72 | 12.87 | 0.38 |
| 650.3086 | 197.3  | 14.40 | 12.40 | 12.67 | 11.97 | 0.73 |
| 650.3669 | 193.44 | 17.72 | 18.91 | 18.69 | 18.37 | 0.83 |
| 650.7258 | 58.75  | 14.30 | 11.87 | 13.13 | 13.59 | 1.07 |
| 650.7361 | 61.46  | 14.98 | 12.51 | 12.27 | 13.18 | 1.47 |
| 650.7573 | 50.38  | 13.46 | 14.27 | 14.00 | 14.08 | 0.88 |
| 650.7933 | 38.2   | 12.47 | 13.04 | 14.16 | 13.47 | 0.63 |
| 650.8149 | 45.83  | 15.45 | 15.20 | 15.09 | 15.89 | 0.15 |
| 650.8361 | 46.74  | 17.93 | 19.68 | 19.81 | 19.74 | 1.78 |
| 650.9358 | 53.63  | 11.85 | 15.64 | 10.02 | 10.69 | 0.48 |
| 650.9558 | 63.29  | 12.03 | 13.52 | 10.03 | 10.79 | 0.14 |
| 651.3701 | 194.81 | 15.54 | 15.14 | 15.91 | 15.49 | 0.03 |
| 651.7344 | 56.94  | 13.57 | 12.99 | 13.91 | 13.72 | 0.11 |
| 651.7610 | 48.1   | 13.07 | 12.77 | 12.48 | 13.12 | 0.41 |
| 651.8066 | 43.51  | 13.87 | 16.54 | 15.74 | 16.11 | 1.36 |
| 651.8391 | 46.19  | 12.67 | 13.11 | 13.11 | 13.58 | 0.51 |
| 651.8879 | 61.07  | 15.64 | 12.25 | 16.17 | 16.34 | 0.74 |
| 652.3242 | 209.59 | 16.82 | 18.51 | 17.90 | 18.36 | 1.16 |
| 652.3459 | 187.56 | 15.59 | 15.41 | 16.41 | 14.77 | 0.10 |
| 652.3849 | 217.75 | 13.42 | 13.93 | 15.20 | 12.83 | 0.44 |
| 652.7353 | 56.78  | 13.82 | 12.73 | 13.68 | 13.52 | 0.38 |
| 652.7513 | 49.49  | 14.82 | 13.94 | 14.59 | 14.45 | 0.58 |
| 652.7731 | 46.44  | 18.39 | 18.53 | 18.89 | 18.89 | 0.60 |
| 652.7944 | 49.58  | 18.89 | 21.09 | 21.31 | 21.06 | 1.90 |
| 652.8334 | 43.73  | 15.04 | 17.36 | 17.30 | 17.52 | 1.59 |
| 652.8768 | 58.01  | 12.16 | 14.63 | 10.23 | 10.85 | 0.18 |
| 652.9352 | 62.75  | 12.15 | 13.26 | 10.10 | 10.74 | 0.33 |
| 653.1301 | 22.28  | 17.23 | 17.51 | 16.92 | 15.90 | 0.08 |
| 653.3272 | 194.98 | 14.39 | 15.43 | 15.96 | 16.14 | 0.78 |
| 653.4546 | 231.39 | 12.79 | 12.07 | 12.76 | 14.02 | 0.11 |
| 653.7772 | 47.48  | 14.56 | 15.91 | 15.29 | 15.52 | 1.34 |
| 653.7978 | 42.38  | 13.44 | 15.03 | 15.24 | 15.22 | 1.40 |
| 653.8673 | 35.83  | 11.47 | 12.12 | 11.80 | 12.01 | 0.36 |
| 653.8763 | 38.1   | 12.59 | 13.70 | 13.74 | 13.39 | 0.81 |
| 653.8841 | 54.88  | 12.33 | 11.94 | 12.58 | 12.73 | 0.03 |
| 654.1249 | 18.69  | 14.80 | 17.29 | 17.06 | 15.75 | 0.88 |
| 654.3037 | 189.77 | 15.45 | 15.12 | 15.11 | 14.94 | 0.38 |
| 654.3249 | 172.47 | 6.76  | 12.31 | 13.85 | 10.48 | 1.41 |
| 654.3424 | 217.45 | 12.63 | 13.50 | 12.51 | 11.95 | 0.15 |
| 654.7102 | 71.23  | 14.63 | 11.75 | 14.69 | 14.31 | 0.97 |
| 654.7316 | 55.38  | 20.65 | 21.31 | 21.90 | 21.65 | 1.62 |
| 654.7528 | 53.2   | 15.74 | 15.83 | 15.19 | 15.44 | 0.25 |
| 654.7717 | 53.08  | 16.84 | 16.70 | 17.06 | 17.06 | 0.09 |
| 654.7794 | 47.2   | 14.02 | 13.43 | 12.89 | 13.59 | 0.76 |
| 654.7929 | 48.92  | 16.74 | 18.99 | 19.33 | 19.05 | 1.84 |
| 655.0763 | 23.23  | 10.57 | 12.30 | 11.08 | 12.96 | 0.48 |
| 655.0861 | 19.99  | 13.03 | 14.23 | 13.79 | 13.76 | 0.74 |
| 655.1078 | 28.77  | 12.98 | 13.16 | 13.34 | 13.65 | 0.19 |
| 655.1167 | 24.22  | 13.31 | 13.29 | 13.24 | 13.97 | 0.04 |
| 655.1778 | 55.94  | 12.12 | 12.95 | 10.20 | 10.83 | 0.44 |
| 655.2496 | 155.12 | 11.81 | 11.83 | 12.42 | 11.72 | 0.22 |
| 655.3091 | 173.49 | 11.80 | 12.97 | 14.64 | 11.68 | 0.64 |
| 655.4741 | 227.11 | 20.89 | 19.06 | 20.40 | 20.60 | 1.06 |
| 655.4958 | 228.53 | 18.03 | 17.41 | 17.29 | 17.59 | 0.35 |
| 655.7020 | 51.41  | 11.58 | 9.31  | 12.41 | 12.42 | 0.38 |

|          |        |       |       |       |       |      |
|----------|--------|-------|-------|-------|-------|------|
| 655.7351 | 55.38  | 16.73 | 17.37 | 18.18 | 17.89 | 1.41 |
| 655.7892 | 48.3   | 12.48 | 12.32 | 12.28 | 13.00 | 0.08 |
| 655.8961 | 54.66  | 11.72 | 12.65 | 12.72 | 12.85 | 0.73 |
| 656.0427 | 16.84  | 8.77  | 12.58 | 12.38 | 11.05 | 1.36 |
| 656.3186 | 200.73 | 19.16 | 19.53 | 19.52 | 19.49 | 0.57 |
| 656.3578 | 204.38 | 15.81 | 16.70 | 17.24 | 16.83 | 0.97 |
| 656.4772 | 227.17 | 19.81 | 17.86 | 19.30 | 19.50 | 1.07 |
| 656.4990 | 228.65 | 16.84 | 15.82 | 15.69 | 15.57 | 0.53 |
| 656.6691 | 66.81  | 14.93 | 14.24 | 16.64 | 16.08 | 0.31 |
| 656.6898 | 71.19  | 14.26 | 11.29 | 14.95 | 13.87 | 0.74 |
| 656.7069 | 65.82  | 14.42 | 11.16 | 14.13 | 13.42 | 1.10 |
| 656.7298 | 55.45  | 19.50 | 20.04 | 20.67 | 20.44 | 1.51 |
| 656.7679 | 51.48  | 13.84 | 13.24 | 13.07 | 13.62 | 0.56 |
| 656.7761 | 45.13  | 13.49 | 12.63 | 12.71 | 13.06 | 0.73 |
| 656.7857 | 47.91  | 14.84 | 13.77 | 14.69 | 15.29 | 0.43 |
| 656.8650 | 40.87  | 14.65 | 16.16 | 15.51 | 16.09 | 0.74 |
| 657.1353 | 63.97  | 6.64  | 20.45 | 7.10  | 6.87  | 1.13 |
| 657.3226 | 202.3  | 17.44 | 17.59 | 17.57 | 17.59 | 0.20 |
| 657.3611 | 204.33 | 13.03 | 12.88 | 13.84 | 13.20 | 0.12 |
| 657.4811 | 227.77 | 17.32 | 13.40 | 16.28 | 16.90 | 1.02 |
| 657.5111 | 234.6  | 20.87 | 21.09 | 21.40 | 20.82 | 0.20 |
| 657.7056 | 59.73  | 13.71 | 10.86 | 13.51 | 12.64 | 1.01 |
| 657.7327 | 57.43  | 13.99 | 12.69 | 13.69 | 13.76 | 1.23 |
| 657.7463 | 50.9   | 13.83 | 14.63 | 14.31 | 14.38 | 0.89 |
| 658.1383 | 64.13  | 13.22 | 16.21 | 11.22 | 11.91 | 0.29 |
| 658.3296 | 199.9  | 15.26 | 13.15 | 12.47 | 13.54 | 1.19 |
| 658.3734 | 212.71 | 13.62 | 13.00 | 13.45 | 12.36 | 0.28 |
| 658.4196 | 158.88 | 14.33 | 13.29 | 13.39 | 13.39 | 0.76 |
| 658.5139 | 234.92 | 19.71 | 19.78 | 20.14 | 19.73 | 0.16 |
| 658.6671 | 67.1   | 13.27 | 10.87 | 15.06 | 13.84 | 0.21 |
| 658.6852 | 62.34  | 15.54 | 15.30 | 17.43 | 16.96 | 0.43 |
| 658.7327 | 54.9   | 17.02 | 17.30 | 18.05 | 17.77 | 1.14 |
| 658.7412 | 46.01  | 14.37 | 14.25 | 14.74 | 14.71 | 0.23 |
| 658.7593 | 35.22  | 12.95 | 13.09 | 13.54 | 13.72 | 0.33 |
| 658.8017 | 47.46  | 14.26 | 14.31 | 13.41 | 14.37 | 0.15 |
| 658.8234 | 43.12  | 17.73 | 20.60 | 20.32 | 20.32 | 1.72 |
| 659.1342 | 63.96  | 13.03 | 15.47 | 11.02 | 11.85 | 0.16 |
| 659.2203 | 151.58 | 10.75 | 10.73 | 11.04 | 10.27 | 0.03 |
| 659.5167 | 241.69 | 20.43 | 19.52 | 19.69 | 19.99 | 0.85 |
| 659.7215 | 59.54  | 13.63 | 11.65 | 14.42 | 13.67 | 0.42 |
| 659.7476 | 52.37  | 13.64 | 12.53 | 12.53 | 13.28 | 1.02 |
| 659.7932 | 45.12  | 13.25 | 17.20 | 16.41 | 16.57 | 1.59 |
| 659.8249 | 43.61  | 13.39 | 14.35 | 13.92 | 14.38 | 0.66 |
| 660.1346 | 64.53  | 11.53 | 12.43 | 9.89  | 10.43 | 0.32 |
| 660.2916 | 46.34  | 10.84 | 11.75 | 11.93 | 11.89 | 0.57 |
| 660.3506 | 208.11 | 16.42 | 15.79 | 15.94 | 15.88 | 0.46 |
| 660.5111 | 240.69 | 16.57 | 14.88 | 15.34 | 15.25 | 0.82 |
| 660.5299 | 247.93 | 17.98 | 17.13 | 17.20 | 17.69 | 0.47 |
| 660.6803 | 60.94  | 16.17 | 14.22 | 16.80 | 16.58 | 0.57 |
| 660.7212 | 60.37  | 14.29 | 14.00 | 15.27 | 14.87 | 0.26 |
| 660.7403 | 56.15  | 14.55 | 13.60 | 14.29 | 14.61 | 0.73 |
| 660.7608 | 41.12  | 18.32 | 19.41 | 18.98 | 19.01 | 1.49 |
| 660.7841 | 42.62  | 13.13 | 12.86 | 12.82 | 13.43 | 0.18 |
| 660.7944 | 47.04  | 14.00 | 15.84 | 15.02 | 15.62 | 1.06 |
| 660.8198 | 43.97  | 16.43 | 18.47 | 18.17 | 18.31 | 1.58 |
| 660.9318 | 54.56  | 11.42 | 12.75 | 9.80  | 10.44 | 0.08 |
| 661.2146 | 163.74 | 10.12 | 10.08 | 10.94 | 10.58 | 0.23 |
| 661.2237 | 155.82 | 9.62  | 9.71  | 10.44 | 9.92  | 0.20 |
| 661.2882 | 27.01  | 12.25 | 12.48 | 10.85 | 12.20 | 0.17 |
| 661.5334 | 264.57 | 21.30 | 20.62 | 20.59 | 20.83 | 1.03 |
| 661.7649 | 46.93  | 14.74 | 16.67 | 16.04 | 15.92 | 1.62 |
| 661.7717 | 41.28  | 13.80 | 14.05 | 13.57 | 13.70 | 0.03 |



|          |        |       |       |       |       |      |
|----------|--------|-------|-------|-------|-------|------|
| 661.7956 | 46.03  | 12.24 | 12.84 | 12.27 | 13.31 | 0.32 |
| 662.3085 | 211.75 | 16.23 | 17.52 | 17.51 | 16.99 | 1.20 |
| 662.3670 | 206.11 | 14.04 | 8.22  | 11.68 | 8.72  | 1.30 |
| 662.5362 | 262.32 | 19.78 | 19.09 | 19.09 | 19.17 | 1.08 |
| 662.6772 | 51.87  | 13.52 | 7.95  | 12.57 | 12.88 | 1.15 |
| 662.6996 | 70.81  | 15.95 | 13.73 | 16.01 | 15.71 | 0.84 |
| 662.7590 | 47.41  | 15.32 | 14.02 | 14.29 | 14.65 | 1.02 |
| 662.7767 | 40.79  | 18.97 | 20.69 | 20.47 | 20.37 | 2.01 |
| 662.8344 | 43.03  | 14.15 | 16.60 | 16.51 | 16.62 | 1.61 |
| 662.9518 | 177.87 | 8.33  | 7.59  | 8.49  | 12.27 | 0.08 |
| 663.1483 | 56.51  | 9.61  | 15.61 | 8.11  | 9.13  | 0.74 |
| 663.1594 | 25.26  | 11.66 | 17.18 | 15.88 | 15.98 | 1.65 |
| 663.2771 | 144.2  | 13.56 | 10.26 | 11.33 | 11.63 | 1.30 |
| 663.3118 | 209.56 | 12.99 | 13.92 | 13.82 | 13.11 | 0.52 |
| 663.5378 | 257.28 | 18.04 | 15.31 | 16.01 | 16.37 | 1.47 |
| 663.7793 | 47.46  | 14.48 | 16.72 | 16.31 | 16.18 | 1.80 |
| 663.8121 | 36.49  | 13.52 | 12.84 | 12.55 | 12.96 | 0.90 |
| 663.8212 | 40.43  | 13.69 | 13.39 | 12.99 | 13.13 | 0.49 |
| 664.1017 | 26.75  | 14.16 | 10.86 | 10.82 | 11.34 | 1.42 |
| 664.3828 | 192.03 | 15.64 | 16.04 | 16.11 | 15.58 | 0.25 |
| 664.6943 | 60.95  | 13.23 | 10.49 | 12.65 | 12.50 | 1.09 |
| 664.7150 | 56.21  | 15.14 | 12.91 | 15.03 | 14.82 | 1.12 |
| 664.7730 | 38.15  | 17.16 | 19.00 | 18.97 | 18.78 | 1.83 |
| 664.8520 | 43.49  | 16.07 | 17.01 | 16.82 | 17.33 | 0.82 |
| 665.2926 | 161.65 | 15.27 | 13.64 | 14.47 | 14.81 | 1.11 |
| 665.3854 | 183.19 | 11.88 | 13.31 | 14.08 | 13.07 | 0.81 |
| 665.7247 | 56.78  | 12.09 | 11.96 | 12.15 | 12.25 | 0.01 |
| 665.7350 | 54.27  | 14.39 | 15.67 | 16.07 | 15.76 | 1.53 |
| 665.7580 | 37.27  | 13.47 | 12.63 | 12.17 | 12.49 | 0.52 |
| 665.7775 | 46.67  | 12.74 | 13.09 | 12.20 | 12.57 | 0.05 |
| 666.3383 | 201.87 | 14.08 | 16.52 | 15.74 | 16.26 | 1.29 |
| 666.3996 | 204.09 | 14.08 | 14.08 | 14.87 | 13.01 | 0.08 |
| 666.7101 | 66.24  | 14.47 | 12.42 | 13.86 | 13.86 | 1.02 |
| 666.7321 | 55.06  | 13.20 | 13.20 | 13.90 | 13.71 | 0.29 |
| 666.7668 | 31.95  | 14.09 | 13.34 | 13.18 | 13.45 | 0.96 |
| 666.7891 | 41.12  | 15.13 | 14.38 | 14.09 | 14.75 | 0.66 |
| 666.8103 | 42.14  | 17.92 | 19.51 | 19.77 | 19.68 | 1.70 |
| 666.9196 | 54.35  | 11.83 | 15.45 | 10.02 | 10.53 | 0.44 |
| 666.9385 | 61.59  | 12.58 | 17.52 | 10.41 | 11.05 | 0.53 |
| 667.3093 | 172.2  | 16.86 | 16.06 | 16.47 | 16.41 | 0.91 |
| 667.3448 | 190.21 | 8.52  | 12.16 | 12.34 | 11.96 | 1.29 |
| 667.7107 | 60.38  | 13.09 | 10.36 | 13.70 | 12.66 | 0.67 |
| 667.7344 | 55.21  | 13.46 | 13.87 | 14.75 | 14.24 | 0.60 |
| 667.7814 | 46.16  | 14.68 | 17.02 | 16.56 | 16.56 | 1.72 |
| 667.8147 | 41.24  | 13.08 | 13.14 | 13.04 | 13.33 | 0.06 |
| 667.8664 | 52.33  | 13.59 | 9.94  | 12.64 | 13.70 | 0.92 |
| 667.9630 | 17.45  | 10.59 | 13.82 | 13.57 | 13.15 | 1.56 |
| 667.9714 | 20.21  | 11.62 | 16.43 | 16.36 | 15.61 | 1.86 |
| 668.2829 | 46.92  | 12.74 | 12.97 | 12.83 | 13.19 | 0.28 |
| 668.3061 | 172.41 | 12.58 | 10.64 | 11.25 | 11.11 | 0.94 |
| 668.3140 | 174.77 | 14.98 | 13.40 | 14.17 | 14.39 | 1.13 |
| 668.7073 | 52.29  | 13.73 | 11.38 | 12.58 | 12.88 | 1.46 |
| 668.7267 | 58.62  | 14.37 | 12.56 | 13.01 | 13.30 | 1.28 |
| 668.7470 | 55.73  | 18.04 | 17.72 | 18.43 | 18.39 | 0.09 |
| 668.7686 | 52.24  | 18.81 | 20.45 | 20.91 | 20.64 | 1.81 |
| 668.8074 | 45.92  | 16.08 | 17.97 | 17.93 | 18.03 | 1.77 |
| 668.9141 | 62.38  | 13.58 | 13.72 | 11.69 | 12.35 | 0.91 |
| 668.9279 | 54.63  | 9.06  | 12.31 | 9.01  | 9.16  | 0.77 |
| 669.1355 | 19.09  | 11.18 | 12.81 | 12.41 | 11.47 | 0.59 |
| 669.3213 | 174.76 | 11.11 | 11.09 | 12.84 | 10.22 | 0.23 |
| 669.4424 | 283.52 | 12.94 | 14.37 | 13.21 | 12.11 | 0.35 |
| 669.4528 | 281.63 | 16.30 | 19.13 | 18.62 | 17.97 | 1.00 |

|          |        |       |       |       |       |      |
|----------|--------|-------|-------|-------|-------|------|
| 669.7536 | 43.79  | 14.22 | 14.30 | 13.78 | 14.14 | 0.23 |
| 669.7748 | 50.12  | 14.76 | 16.40 | 16.52 | 16.49 | 1.71 |
| 669.8468 | 36.63  | 14.28 | 15.51 | 15.43 | 14.90 | 1.10 |
| 669.9344 | 49.6   | 11.34 | 12.26 | 11.69 | 11.44 | 0.55 |
| 670.3343 | 207.05 | 17.72 | 17.59 | 17.66 | 17.52 | 0.15 |
| 670.4589 | 283.04 | 13.23 | 16.23 | 14.87 | 14.64 | 0.76 |
| 670.7056 | 56.45  | 19.79 | 20.19 | 21.06 | 20.77 | 1.13 |
| 670.7273 | 58.38  | 16.29 | 16.16 | 17.02 | 16.84 | 0.50 |
| 670.7464 | 55.77  | 16.73 | 15.94 | 16.76 | 16.80 | 0.63 |
| 670.7671 | 51.83  | 17.00 | 18.64 | 19.23 | 18.92 | 1.73 |
| 670.8012 | 31.85  | 13.60 | 12.43 | 12.58 | 12.97 | 0.79 |
| 670.8798 | 42.65  | 12.18 | 12.43 | 12.82 | 12.85 | 0.26 |
| 670.9016 | 36.52  | 9.95  | 12.28 | 11.59 | 11.53 | 0.86 |
| 671.0737 | 17.59  | 10.02 | 12.69 | 12.43 | 11.55 | 0.97 |
| 671.0853 | 22.44  | 13.09 | 13.66 | 13.68 | 13.57 | 0.39 |
| 671.1510 | 64.45  | 10.53 | 12.69 | 9.31  | 9.64  | 0.33 |
| 671.3379 | 202.41 | 15.39 | 13.46 | 13.61 | 13.97 | 1.34 |
| 671.4666 | 290.95 | 18.35 | 21.31 | 20.89 | 20.66 | 1.32 |
| 671.7091 | 57.18  | 15.95 | 15.73 | 17.31 | 16.94 | 0.60 |
| 671.7691 | 51.54  | 12.51 | 13.44 | 13.80 | 13.71 | 0.85 |
| 671.8653 | 58.11  | 11.75 | 12.35 | 13.15 | 13.11 | 0.84 |
| 671.9517 | 47.93  | 12.39 | 11.97 | 11.35 | 12.64 | 0.44 |
| 672.2928 | 204.54 | 17.26 | 18.57 | 18.71 | 18.12 | 1.43 |
| 672.4700 | 293.21 | 15.96 | 19.82 | 19.19 | 19.02 | 1.39 |
| 672.6663 | 68.63  | 10.18 | 8.48  | 11.52 | 11.19 | 0.07 |
| 672.7039 | 56.57  | 18.77 | 19.06 | 20.03 | 19.74 | 0.99 |
| 672.7262 | 60.59  | 14.03 | 12.95 | 13.06 | 13.38 | 1.26 |
| 672.7425 | 54.8   | 13.93 | 11.86 | 13.32 | 13.55 | 0.87 |
| 672.7536 | 47.46  | 13.68 | 12.82 | 13.00 | 13.23 | 0.66 |
| 672.7637 | 52.4   | 14.06 | 12.56 | 12.70 | 13.10 | 1.56 |
| 672.7988 | 39.72  | 11.91 | 12.54 | 12.37 | 12.41 | 0.37 |
| 672.8155 | 32.88  | 12.84 | 13.11 | 13.38 | 13.21 | 0.21 |
| 672.8390 | 43.09  | 15.92 | 18.04 | 17.73 | 18.00 | 1.48 |
| 672.8597 | 42.67  | 14.47 | 16.92 | 16.48 | 16.58 | 1.37 |
| 673.1293 | 65.33  | 8.71  | 13.02 | 8.40  | 8.95  | 0.95 |
| 673.2961 | 206.49 | 15.22 | 16.30 | 16.51 | 15.64 | 0.87 |
| 673.4785 | 285.41 | 16.46 | 16.96 | 17.34 | 17.04 | 0.35 |
| 673.5048 | 278.65 | 15.97 | 12.84 | 13.94 | 13.97 | 1.12 |
| 673.7081 | 51     | 13.24 | 11.11 | 12.34 | 12.88 | 0.93 |
| 673.7200 | 56.28  | 13.74 | 12.79 | 13.78 | 13.60 | 0.66 |
| 673.8000 | 43.48  | 12.84 | 13.37 | 12.29 | 13.04 | 0.05 |
| 673.8677 | 54.62  | 11.83 | 9.81  | 12.55 | 12.15 | 0.26 |
| 674.2903 | 199.98 | 13.71 | 12.67 | 12.42 | 12.99 | 1.04 |
| 674.7026 | 58     | 15.95 | 15.66 | 17.10 | 16.71 | 0.51 |
| 674.7185 | 55.7   | 14.23 | 13.24 | 14.43 | 14.27 | 0.65 |
| 674.7288 | 51.28  | 13.93 | 12.03 | 12.36 | 12.79 | 1.36 |
| 674.7759 | 54.36  | 14.50 | 11.62 | 10.66 | 12.30 | 1.29 |
| 674.7977 | 44.89  | 18.78 | 21.29 | 21.11 | 21.03 | 1.88 |
| 675.0433 | 20.16  | 11.86 | 12.33 | 12.20 | 12.36 | 0.32 |
| 675.1051 | 26.76  | 14.53 | 11.18 | 11.96 | 11.10 | 1.32 |
| 675.4953 | 280.81 | 14.41 | 15.48 | 14.84 | 16.05 | 0.50 |
| 675.7192 | 57.31  | 13.31 | 11.88 | 12.77 | 12.92 | 0.98 |
| 675.7680 | 47.62  | 14.29 | 17.07 | 16.70 | 16.64 | 1.76 |
| 675.8010 | 45.39  | 15.05 | 17.44 | 17.31 | 17.32 | 1.79 |
| 676.2666 | 47.92  | 11.23 | 12.79 | 12.17 | 12.90 | 1.05 |
| 676.3064 | 203.31 | 13.59 | 10.88 | 11.40 | 11.90 | 0.85 |
| 676.3455 | 186.43 | 12.72 | 12.77 | 13.32 | 13.60 | 0.22 |
| 676.6952 | 61.74  | 14.21 | 11.53 | 14.23 | 13.58 | 0.87 |
| 676.7161 | 58.24  | 13.94 | 12.01 | 13.04 | 13.46 | 1.01 |
| 676.7345 | 45.57  | 18.55 | 19.01 | 18.63 | 18.57 | 0.41 |
| 676.7696 | 48.67  | 14.34 | 15.96 | 15.58 | 15.64 | 1.42 |
| 676.7947 | 40     | 17.13 | 19.39 | 19.23 | 19.23 | 1.76 |

|          |        |       |       |       |       |      |
|----------|--------|-------|-------|-------|-------|------|
| 676.8483 | 42.09  | 11.32 | 11.61 | 12.30 | 12.81 | 0.41 |
| 677.0650 | 24.94  | 10.85 | 11.68 | 11.51 | 11.97 | 0.52 |
| 677.0886 | 29.81  | 11.83 | 11.37 | 11.51 | 12.65 | 0.15 |
| 677.4562 | 227.02 | 16.30 | 11.69 | 14.71 | 16.32 | 1.18 |
| 677.5374 | 274.1  | 15.67 | 12.27 | 13.02 | 13.50 | 0.89 |
| 677.7393 | 52.19  | 13.81 | 13.60 | 13.36 | 13.55 | 0.53 |
| 677.7653 | 41.88  | 11.17 | 12.81 | 12.57 | 12.73 | 1.01 |
| 677.7916 | 46.79  | 11.89 | 12.78 | 12.37 | 12.50 | 0.47 |
| 677.8021 | 45.03  | 12.37 | 13.82 | 13.44 | 13.94 | 0.99 |
| 678.4010 | 188.62 | 12.61 | 14.22 | 14.98 | 12.61 | 0.81 |
| 678.4596 | 227.17 | 14.10 | 10.24 | 11.58 | 14.11 | 1.22 |
| 678.6720 | 71.15  | 15.78 | 14.68 | 16.39 | 15.90 | 0.32 |
| 678.7325 | 56.66  | 14.90 | 14.13 | 14.13 | 14.29 | 1.18 |
| 678.7502 | 44.48  | 19.08 | 20.34 | 20.40 | 20.23 | 1.88 |
| 678.7776 | 45.66  | 12.74 | 12.36 | 11.99 | 12.67 | 0.34 |
| 678.7850 | 40.27  | 14.05 | 13.00 | 12.89 | 13.24 | 1.04 |
| 678.8085 | 44.52  | 14.24 | 17.45 | 17.52 | 17.53 | 1.75 |
| 679.1174 | 64.49  | 12.64 | 16.23 | 10.50 | 11.16 | 0.35 |
| 679.5483 | 289.26 | 15.46 | 11.21 | 11.37 | 12.24 | 1.80 |
| 679.7552 | 45.99  | 13.96 | 13.47 | 13.61 | 13.71 | 0.78 |
| 679.7875 | 44.42  | 15.18 | 15.76 | 14.91 | 15.15 | 0.15 |
| 680.1255 | 64.98  | 12.45 | 12.86 | 10.45 | 11.10 | 0.72 |
| 680.3188 | 202.4  | 17.71 | 17.73 | 18.01 | 18.15 | 0.30 |
| 680.3786 | 189.62 | 13.56 | 14.00 | 15.33 | 13.85 | 0.54 |
| 680.6659 | 73.03  | 11.93 | 9.42  | 11.84 | 11.63 | 0.80 |
| 680.6852 | 67.27  | 16.35 | 15.40 | 17.18 | 16.74 | 0.10 |
| 680.7470 | 46.98  | 18.03 | 19.02 | 19.05 | 18.89 | 1.79 |
| 680.7851 | 40.06  | 12.70 | 13.10 | 12.92 | 13.26 | 0.40 |
| 680.8053 | 49.24  | 14.07 | 12.89 | 12.72 | 13.72 | 0.77 |
| 680.8258 | 43.54  | 16.61 | 17.58 | 17.34 | 17.76 | 0.94 |
| 680.8459 | 44.43  | 12.35 | 12.66 | 12.89 | 13.23 | 0.36 |
| 680.9714 | 60.09  | 12.91 | 14.64 | 10.73 | 11.63 | 0.10 |
| 681.1193 | 65.25  | 10.18 | 13.21 | 8.32  | 8.70  | 0.25 |
| 681.2973 | 244.42 | 16.93 | 18.52 | 19.00 | 17.59 | 1.40 |
| 681.3224 | 202.46 | 15.80 | 14.18 | 15.08 | 15.74 | 0.81 |
| 681.5109 | 232.42 | 20.39 | 21.10 | 21.56 | 20.78 | 0.48 |
| 681.7086 | 57.67  | 13.73 | 12.61 | 13.82 | 13.71 | 0.69 |
| 681.7517 | 51.77  | 13.50 | 12.98 | 12.95 | 13.58 | 0.42 |
| 681.7900 | 45.65  | 12.45 | 12.85 | 11.52 | 12.78 | 0.07 |
| 682.3007 | 244.81 | 13.51 | 16.51 | 17.04 | 15.37 | 1.56 |
| 682.3341 | 206.98 | 14.72 | 12.74 | 12.11 | 13.07 | 1.10 |
| 682.3602 | 165.69 | 11.66 | 15.82 | 16.59 | 11.50 | 1.25 |
| 682.5133 | 232.65 | 19.28 | 19.90 | 20.40 | 19.71 | 0.50 |
| 682.6852 | 66.59  | 15.07 | 12.40 | 15.48 | 15.06 | 0.76 |
| 682.7070 | 57.86  | 14.09 | 13.29 | 15.03 | 14.72 | 0.05 |
| 682.7417 | 34.16  | 13.97 | 13.35 | 13.39 | 13.81 | 0.57 |
| 682.7629 | 49.38  | 14.75 | 13.68 | 13.94 | 14.66 | 0.49 |
| 682.7839 | 50.87  | 17.78 | 18.86 | 19.38 | 19.24 | 1.60 |
| 682.8231 | 41.29  | 12.54 | 12.52 | 12.30 | 13.19 | 0.02 |
| 682.8822 | 52.93  | 12.97 | 14.04 | 10.95 | 11.63 | 0.35 |
| 682.8905 | 55.21  | 13.18 | 13.02 | 11.30 | 11.90 | 1.08 |
| 682.9072 | 62.52  | 12.66 | 16.16 | 10.63 | 11.57 | 0.38 |
| 683.0806 | 19.29  | 8.82  | 14.04 | 12.96 | 10.94 | 1.63 |
| 683.2824 | 172.49 | 13.83 | 14.07 | 14.85 | 13.88 | 0.39 |
| 683.5214 | 235.69 | 18.88 | 18.95 | 19.39 | 19.26 | 0.20 |
| 683.7076 | 50.71  | 12.81 | 10.51 | 12.37 | 12.22 | 0.84 |
| 683.7532 | 48.97  | 14.20 | 15.48 | 15.15 | 14.99 | 1.41 |
| 683.7844 | 48.55  | 12.48 | 12.56 | 12.77 | 12.97 | 0.17 |
| 684.2838 | 172.23 | 8.87  | 9.85  | 10.20 | 9.63  | 0.57 |
| 684.3497 | 197.84 | 15.28 | 13.56 | 14.41 | 13.52 | 0.82 |
| 684.5293 | 238.52 | 16.71 | 17.00 | 17.46 | 17.38 | 0.30 |
| 684.6791 | 63.46  | 13.79 | 10.39 | 12.41 | 12.46 | 1.70 |

|          |        |       |       |       |       |      |
|----------|--------|-------|-------|-------|-------|------|
| 684.6994 | 63.68  | 14.02 | 11.10 | 12.86 | 12.86 | 1.39 |
| 684.7205 | 57.32  | 17.08 | 16.22 | 17.54 | 17.41 | 0.26 |
| 684.7427 | 54.34  | 18.41 | 19.34 | 20.13 | 19.86 | 1.53 |
| 684.7811 | 48.07  | 16.52 | 17.91 | 17.89 | 17.98 | 1.77 |
| 684.8991 | 53.42  | 9.63  | 12.81 | 9.86  | 10.58 | 0.73 |
| 684.9090 | 61.47  | 9.55  | 14.06 | 9.73  | 9.94  | 0.98 |
| 685.3563 | 179.34 | 11.44 | 12.33 | 12.83 | 9.15  | 0.25 |
| 685.5193 | 246.89 | 15.71 | 15.13 | 15.55 | 15.30 | 0.27 |
| 685.5328 | 244.41 | 20.03 | 19.37 | 19.58 | 19.74 | 0.95 |
| 685.7294 | 47.68  | 13.85 | 12.99 | 12.84 | 13.09 | 1.12 |
| 685.7419 | 55.21  | 13.15 | 12.47 | 13.09 | 13.11 | 0.45 |
| 685.7502 | 52     | 14.52 | 15.66 | 15.79 | 15.69 | 1.38 |
| 685.7963 | 43.91  | 12.45 | 13.89 | 13.04 | 13.56 | 0.64 |
| 685.8118 | 32.02  | 12.74 | 12.12 | 12.06 | 12.08 | 0.52 |
| 685.8214 | 38.27  | 13.79 | 13.50 | 13.46 | 13.33 | 0.46 |
| 685.9027 | 51.64  | 11.03 | 12.49 | 12.73 | 11.92 | 1.07 |
| 686.0505 | 17.03  | 11.15 | 14.56 | 13.53 | 13.34 | 1.63 |
| 686.1428 | 19.01  | 15.90 | 13.40 | 13.76 | 13.51 | 1.21 |
| 686.3082 | 207.4  | 14.99 | 15.85 | 16.26 | 15.07 | 0.66 |
| 686.5208 | 242.93 | 14.49 | 13.17 | 13.16 | 13.53 | 1.21 |
| 686.5351 | 244.01 | 18.63 | 17.92 | 18.16 | 18.32 | 0.91 |
| 686.6794 | 57.54  | 17.87 | 17.93 | 19.19 | 18.81 | 0.73 |
| 686.7003 | 60.1   | 16.52 | 15.99 | 17.51 | 17.15 | 0.26 |
| 686.7204 | 58.4   | 16.19 | 14.54 | 16.23 | 16.19 | 0.95 |
| 686.7407 | 54.29  | 16.85 | 17.80 | 18.68 | 18.36 | 1.44 |
| 686.7696 | 43.81  | 12.92 | 13.25 | 13.38 | 13.67 | 0.48 |
| 686.7986 | 45.29  | 12.52 | 12.87 | 12.78 | 13.22 | 0.34 |
| 686.8541 | 44.15  | 13.10 | 13.35 | 13.51 | 13.64 | 0.24 |
| 686.8751 | 36.52  | 12.62 | 13.92 | 13.69 | 14.21 | 0.68 |
| 687.0343 | 17.06  | 11.24 | 16.14 | 16.36 | 15.04 | 1.98 |
| 687.2770 | 137.42 | 18.08 | 17.44 | 17.55 | 17.33 | 0.65 |
| 687.5423 | 271.21 | 21.05 | 21.34 | 21.46 | 21.40 | 0.63 |
| 687.6811 | 60.3   | 12.38 | 9.60  | 12.03 | 11.78 | 0.78 |
| 687.7451 | 55.21  | 12.69 | 11.39 | 13.04 | 12.57 | 0.25 |
| 687.7732 | 46.08  | 12.17 | 13.54 | 13.07 | 13.38 | 1.01 |
| 687.8409 | 59.44  | 11.83 | 11.49 | 12.78 | 12.59 | 0.21 |
| 687.9232 | 50.46  | 12.88 | 12.03 | 11.84 | 12.36 | 0.60 |
| 687.9304 | 43.57  | 13.00 | 12.03 | 12.34 | 12.61 | 0.58 |
| 688.2802 | 142.21 | 16.69 | 13.15 | 13.90 | 14.63 | 1.83 |
| 688.5450 | 266.06 | 19.60 | 19.93 | 20.09 | 20.27 | 0.63 |
| 688.6779 | 57.73  | 16.97 | 16.77 | 18.28 | 17.88 | 0.53 |
| 688.6987 | 60.98  | 15.03 | 13.45 | 16.25 | 15.87 | 0.14 |
| 688.7171 | 58.15  | 13.61 | 11.10 | 12.91 | 13.22 | 0.96 |
| 688.7376 | 55.08  | 13.23 | 12.49 | 12.80 | 13.00 | 0.68 |
| 688.7739 | 40.95  | 11.90 | 13.25 | 13.23 | 13.23 | 1.19 |
| 688.7895 | 35.97  | 13.13 | 13.25 | 13.32 | 13.58 | 0.19 |
| 688.8126 | 45.34  | 16.84 | 18.64 | 18.51 | 18.64 | 1.58 |
| 688.8346 | 39.25  | 14.17 | 16.61 | 16.43 | 16.51 | 1.63 |
| 688.9198 | 64.73  | 12.83 | 12.93 | 10.78 | 11.46 | 0.94 |
| 689.2844 | 150.36 | 13.55 | 11.97 | 12.02 | 12.04 | 1.04 |
| 689.2945 | 158.76 | 12.46 | 10.44 | 10.66 | 10.57 | 0.94 |
| 689.5536 | 289.86 | 17.48 | 18.77 | 19.39 | 19.07 | 1.19 |
| 689.6943 | 59.66  | 13.56 | 11.63 | 12.97 | 12.97 | 0.92 |
| 689.7796 | 46.53  | 13.17 | 13.32 | 12.70 | 13.54 | 0.04 |
| 689.7934 | 44.93  | 11.66 | 13.32 | 12.82 | 13.20 | 0.88 |
| 689.8158 | 37.89  | 11.79 | 12.56 | 12.38 | 12.53 | 0.43 |
| 689.8376 | 40.15  | 10.95 | 12.84 | 12.91 | 12.89 | 0.90 |
| 690.5604 | 296.85 | 16.41 | 17.62 | 18.27 | 17.82 | 1.37 |
| 690.6724 | 51.68  | 12.44 | 10.98 | 12.16 | 12.62 | 0.53 |
| 690.6920 | 59.14  | 13.56 | 11.59 | 13.41 | 13.31 | 0.83 |
| 690.7713 | 41.23  | 19.37 | 21.46 | 21.40 | 21.26 | 2.01 |
| 690.8110 | 44.91  | 14.84 | 14.89 | 14.58 | 15.65 | 0.01 |

|          |        |       |       |       |       |      |
|----------|--------|-------|-------|-------|-------|------|
| 691.2501 | 156.93 | 12.63 | 10.52 | 10.67 | 11.48 | 1.42 |
| 691.4565 | 246.18 | 19.35 | 19.53 | 19.23 | 17.94 | 0.11 |
| 691.5601 | 298.95 | 11.19 | 11.68 | 11.84 | 12.07 | 0.51 |
| 691.5700 | 296.84 | 11.30 | 11.78 | 11.77 | 12.02 | 0.42 |
| 691.7407 | 50.73  | 13.43 | 14.97 | 14.77 | 14.78 | 1.34 |
| 691.7757 | 47.44  | 15.36 | 17.44 | 17.39 | 17.33 | 1.87 |
| 692.4601 | 238.65 | 17.55 | 17.78 | 17.21 | 15.64 | 0.17 |
| 692.7084 | 50.01  | 18.58 | 18.48 | 19.29 | 19.04 | 0.52 |
| 692.7405 | 50.75  | 13.46 | 14.42 | 14.23 | 14.35 | 0.96 |
| 692.7689 | 41.45  | 18.11 | 19.79 | 19.79 | 19.69 | 1.97 |
| 692.8211 | 39.16  | 12.74 | 13.15 | 12.86 | 13.20 | 0.37 |
| 693.4724 | 272.79 | 23.91 | 23.91 | 23.51 | 23.50 | 0.23 |
| 693.7129 | 57.66  | 13.86 | 12.53 | 13.47 | 13.50 | 1.02 |
| 693.7375 | 51.7   | 11.86 | 12.61 | 12.44 | 12.94 | 0.56 |
| 693.7685 | 49.58  | 13.16 | 12.96 | 12.72 | 13.01 | 0.25 |
| 693.7777 | 46.66  | 12.43 | 13.94 | 13.77 | 13.99 | 1.09 |
| 693.7877 | 40.03  | 12.42 | 14.54 | 13.31 | 13.99 | 0.96 |
| 694.0663 | 16.92  | 10.35 | 13.85 | 13.18 | 12.57 | 1.55 |
| 694.1038 | 18.21  | 11.65 | 16.49 | 15.00 | 13.92 | 1.23 |
| 694.3347 | 203.78 | 16.06 | 14.70 | 15.40 | 15.67 | 0.79 |
| 694.4304 | 203.24 | 14.29 | 17.09 | 17.11 | 16.28 | 1.70 |
| 694.4758 | 267.52 | 22.46 | 22.42 | 22.09 | 22.01 | 0.23 |
| 694.6456 | 72.19  | 11.76 | 10.94 | 14.60 | 13.43 | 0.34 |
| 694.7063 | 59.88  | 16.66 | 15.75 | 17.00 | 16.79 | 0.40 |
| 694.7242 | 54.48  | 18.99 | 19.68 | 20.13 | 19.89 | 1.64 |
| 694.7600 | 43.29  | 14.14 | 12.73 | 12.99 | 13.33 | 1.41 |
| 694.7839 | 40.16  | 14.47 | 17.48 | 17.41 | 17.60 | 1.81 |
| 694.9973 | 17.63  | 10.40 | 13.29 | 13.02 | 12.69 | 1.25 |
| 695.0053 | 21.09  | 12.80 | 16.88 | 16.86 | 15.73 | 1.59 |
| 695.0464 | 19.96  | 11.14 | 13.90 | 13.87 | 13.27 | 1.69 |
| 695.0880 | 17.87  | 10.33 | 14.60 | 14.76 | 13.97 | 1.16 |
| 695.3126 | 244.74 | 16.14 | 17.28 | 17.84 | 16.09 | 0.91 |
| 695.4718 | 280.54 | 20.00 | 20.61 | 20.28 | 20.23 | 0.29 |
| 695.7280 | 57.07  | 13.55 | 12.80 | 13.06 | 13.11 | 0.80 |
| 695.7548 | 43.07  | 12.41 | 12.85 | 12.43 | 13.00 | 0.27 |
| 695.7613 | 47.16  | 13.70 | 14.80 | 14.14 | 14.51 | 0.84 |
| 696.2927 | 203.86 | 15.45 | 16.41 | 17.02 | 16.48 | 1.13 |
| 696.3162 | 245.12 | 14.27 | 15.30 | 15.89 | 13.48 | 0.61 |
| 696.3714 | 176.13 | 11.05 | 15.44 | 15.50 | 10.76 | 1.25 |
| 696.4703 | 282.1  | 17.11 | 18.50 | 18.27 | 17.93 | 0.65 |
| 696.6550 | 70.93  | 10.28 | 7.41  | 11.53 | 11.04 | 0.27 |
| 696.6629 | 68.69  | 14.17 | 11.59 | 15.52 | 14.57 | 0.38 |
| 696.7207 | 52.92  | 18.12 | 18.49 | 18.89 | 18.73 | 1.12 |
| 696.7611 | 47.04  | 12.10 | 13.97 | 13.41 | 13.82 | 1.20 |
| 696.7790 | 47.78  | 14.23 | 13.17 | 13.58 | 14.40 | 0.70 |
| 696.7999 | 43.38  | 16.81 | 18.12 | 17.65 | 18.07 | 1.17 |
| 696.8247 | 43.51  | 12.56 | 12.91 | 12.98 | 13.06 | 0.29 |
| 696.9440 | 59.71  | 10.19 | 15.80 | 9.22  | 9.72  | 0.82 |
| 697.0897 | 65.99  | 12.49 | 12.65 | 10.29 | 11.18 | 0.69 |
| 697.2958 | 204.54 | 12.13 | 12.61 | 13.04 | 12.43 | 0.37 |
| 697.3566 | 179.54 | 12.92 | 15.17 | 15.98 | 11.22 | 0.68 |
| 697.4802 | 294.28 | 16.83 | 17.56 | 17.63 | 17.40 | 0.36 |
| 697.6801 | 60.09  | 12.70 | 10.63 | 11.84 | 12.07 | 1.01 |
| 697.7613 | 45.57  | 13.14 | 13.18 | 13.49 | 13.45 | 0.17 |
| 697.7744 | 44.34  | 11.40 | 12.59 | 11.66 | 12.86 | 0.47 |
| 697.7964 | 42.33  | 12.97 | 12.82 | 11.72 | 12.10 | 0.41 |
| 697.9502 | 58.64  | 12.44 | 12.46 | 10.54 | 11.13 | 0.87 |
| 697.9658 | 282.6  | 15.51 | 15.19 | 11.96 | 14.76 | 0.67 |
| 698.5138 | 292.39 | 17.50 | 16.02 | 15.81 | 16.03 | 1.09 |
| 698.6555 | 67.91  | 12.58 | 10.65 | 12.18 | 12.35 | 0.77 |
| 698.6835 | 60.29  | 13.41 | 10.78 | 13.08 | 12.90 | 0.97 |
| 698.7151 | 51.07  | 14.02 | 12.71 | 13.04 | 13.50 | 1.16 |

|          |        |       |       |       |       |      |
|----------|--------|-------|-------|-------|-------|------|
| 698.7271 | 54.32  | 15.58 | 14.34 | 14.57 | 15.29 | 1.05 |
| 698.7580 | 46.49  | 17.07 | 17.70 | 18.51 | 18.35 | 1.24 |
| 698.7773 | 49.16  | 12.93 | 13.29 | 12.70 | 13.26 | 0.10 |
| 698.7970 | 47.27  | 13.65 | 13.17 | 12.84 | 13.57 | 0.32 |
| 698.8160 | 41.57  | 15.80 | 18.54 | 18.01 | 18.05 | 1.60 |
| 698.8814 | 63.85  | 9.93  | 14.49 | 9.23  | 9.85  | 0.83 |
| 698.9383 | 53.72  | 12.58 | 12.09 | 10.54 | 11.26 | 1.23 |
| 699.4967 | 284.4  | 15.41 | 17.23 | 17.00 | 16.93 | 0.93 |
| 699.5197 | 285.93 | 18.12 | 15.24 | 15.66 | 15.93 | 1.61 |
| 699.7275 | 52.78  | 13.63 | 14.38 | 14.48 | 14.34 | 0.98 |
| 699.7573 | 50.37  | 12.44 | 12.00 | 12.43 | 12.43 | 0.13 |
| 700.3065 | 211.41 | 14.14 | 13.16 | 12.78 | 13.99 | 0.76 |
| 700.5282 | 290.38 | 17.49 | 16.21 | 16.00 | 16.54 | 0.69 |
| 700.6710 | 65.39  | 13.39 | 10.25 | 12.04 | 12.66 | 1.32 |
| 700.6943 | 59.84  | 15.39 | 13.34 | 15.93 | 15.66 | 0.58 |
| 700.7168 | 55.39  | 17.58 | 17.94 | 18.99 | 18.74 | 1.06 |
| 700.7321 | 55.08  | 13.32 | 13.28 | 12.65 | 13.13 | 0.23 |
| 700.7550 | 50.67  | 16.68 | 17.45 | 17.57 | 17.52 | 1.58 |
| 700.7921 | 47.67  | 11.58 | 11.75 | 11.60 | 13.03 | 0.16 |
| 700.8166 | 35.75  | 12.84 | 12.55 | 12.98 | 13.24 | 0.03 |
| 700.8754 | 55.51  | 11.25 | 13.05 | 9.73  | 10.59 | 0.12 |
| 700.8874 | 50.94  | 9.09  | 13.17 | 8.01  | 8.98  | 0.53 |
| 701.2933 | 147.85 | 14.19 | 10.40 | 9.67  | 10.91 | 1.65 |
| 701.5135 | 265.21 | 13.17 | 20.53 | 19.71 | 20.51 | 1.83 |
| 701.5330 | 286.27 | 16.86 | 14.35 | 14.09 | 14.47 | 1.22 |
| 701.7020 | 59.25  | 13.88 | 11.36 | 13.99 | 13.64 | 0.75 |
| 701.7239 | 55.3   | 13.27 | 12.50 | 13.04 | 13.19 | 0.52 |
| 701.7345 | 50.7   | 11.49 | 11.90 | 12.47 | 12.52 | 0.41 |
| 701.7726 | 46.17  | 11.90 | 15.79 | 15.13 | 15.23 | 1.70 |
| 701.7938 | 33.68  | 13.54 | 13.23 | 13.03 | 13.00 | 0.40 |
| 702.0515 | 16.84  | 10.31 | 15.17 | 14.81 | 13.80 | 1.82 |
| 702.0799 | 20.9   | 13.78 | 17.01 | 17.10 | 15.98 | 1.41 |
| 702.5168 | 274.34 | 14.43 | 19.10 | 18.35 | 18.76 | 1.75 |
| 702.6736 | 54.85  | 15.00 | 12.04 | 15.65 | 14.92 | 0.71 |
| 702.6953 | 61.68  | 14.79 | 12.41 | 14.72 | 14.29 | 0.92 |
| 702.7148 | 55.67  | 16.19 | 16.54 | 17.67 | 17.34 | 0.97 |
| 702.7704 | 46.66  | 11.33 | 13.88 | 13.42 | 13.66 | 1.51 |
| 702.8288 | 42     | 13.88 | 14.34 | 14.11 | 15.04 | 0.27 |
| 702.8494 | 44.2   | 14.61 | 17.32 | 17.32 | 17.36 | 1.59 |
| 703.2510 | 135.97 | 15.92 | 16.50 | 17.28 | 16.51 | 0.85 |
| 703.5246 | 283.18 | 14.49 | 16.05 | 15.43 | 15.95 | 0.89 |
| 703.5527 | 289.59 | 16.57 | 14.34 | 14.78 | 14.01 | 1.01 |
| 703.7466 | 48.47  | 12.95 | 13.37 | 13.01 | 13.34 | 0.30 |
| 703.7740 | 46.34  | 12.73 | 13.85 | 13.33 | 13.94 | 0.81 |
| 703.9043 | 55.63  | 13.85 | 12.07 | 12.85 | 13.66 | 1.08 |
| 704.2545 | 133.6  | 13.07 | 12.44 | 14.29 | 13.21 | 0.09 |
| 704.3405 | 191.84 | 13.85 | 13.09 | 12.06 | 13.52 | 0.73 |
| 704.6725 | 63.15  | 14.00 | 11.29 | 14.53 | 13.54 | 0.58 |
| 704.7119 | 48.79  | 13.38 | 12.01 | 12.43 | 12.80 | 0.87 |
| 704.7471 | 47.57  | 14.05 | 15.85 | 15.02 | 15.47 | 1.31 |
| 704.7647 | 45.37  | 13.08 | 12.90 | 13.94 | 13.89 | 0.24 |
| 704.7866 | 41.69  | 17.18 | 18.66 | 18.56 | 18.66 | 1.61 |
| 704.8091 | 46.71  | 16.06 | 19.36 | 19.41 | 19.29 | 1.74 |
| 704.8907 | 64.87  | 13.24 | 13.79 | 11.25 | 11.93 | 0.65 |
| 705.4714 | 261.83 | 18.12 | 17.49 | 17.58 | 16.72 | 0.46 |
| 705.5111 | 230.47 | 19.92 | 19.37 | 19.98 | 19.80 | 0.22 |
| 705.7917 | 45.76  | 13.62 | 13.58 | 13.20 | 13.74 | 0.18 |
| 705.8092 | 40.81  | 13.11 | 13.00 | 13.19 | 13.65 | 0.04 |
| 706.4755 | 253.58 | 15.99 | 15.55 | 14.76 | 14.33 | 0.43 |
| 706.5145 | 230.57 | 18.79 | 18.19 | 18.83 | 18.70 | 0.24 |
| 706.7240 | 61.93  | 14.82 | 11.29 | 14.00 | 14.44 | 1.19 |
| 706.7453 | 43.92  | 19.52 | 21.14 | 21.29 | 21.10 | 1.96 |

|          |        |       |       |       |       |      |
|----------|--------|-------|-------|-------|-------|------|
| 706.7851 | 47.76  | 15.66 | 16.44 | 16.44 | 16.66 | 0.93 |
| 706.8056 | 46.48  | 13.17 | 14.42 | 14.57 | 14.69 | 1.23 |
| 707.2218 | 155.76 | 10.31 | 10.28 | 10.95 | 10.63 | 0.17 |
| 707.4645 | 285.1  | 13.30 | 15.23 | 10.83 | 11.79 | 0.10 |
| 707.4876 | 290.14 | 20.27 | 19.23 | 19.36 | 19.78 | 0.59 |
| 707.5232 | 233.57 | 18.42 | 18.01 | 18.39 | 18.16 | 0.15 |
| 707.7144 | 54.89  | 14.55 | 15.25 | 15.90 | 15.46 | 1.29 |
| 707.7497 | 50.08  | 14.33 | 15.02 | 15.13 | 15.10 | 1.45 |
| 708.4910 | 288.12 | 18.37 | 16.93 | 16.66 | 17.35 | 0.73 |
| 708.5295 | 235.13 | 16.19 | 15.53 | 15.81 | 15.71 | 0.22 |
| 708.6823 | 59.59  | 18.20 | 18.02 | 19.18 | 18.83 | 0.61 |
| 708.7135 | 55.02  | 14.16 | 14.98 | 15.62 | 15.20 | 1.40 |
| 708.7209 | 48     | 13.90 | 12.73 | 12.73 | 12.76 | 1.31 |
| 708.7429 | 50.7   | 18.44 | 19.72 | 19.93 | 19.78 | 1.89 |
| 708.7907 | 46.06  | 12.14 | 14.29 | 14.26 | 15.03 | 0.99 |
| 708.8020 | 44.37  | 12.96 | 12.92 | 12.79 | 13.04 | 0.06 |
| 709.1061 | 17.49  | 12.44 | 14.48 | 13.82 | 13.36 | 0.75 |
| 709.1482 | 63.07  | 11.23 | 16.18 | 9.57  | 10.03 | 0.63 |
| 709.2595 | 157.06 | 13.81 | 10.35 | 10.40 | 11.35 | 1.91 |
| 709.5287 | 240.64 | 19.12 | 18.17 | 18.54 | 18.64 | 1.20 |
| 709.6842 | 60.99  | 13.09 | 10.62 | 13.26 | 13.12 | 0.83 |
| 709.7121 | 48.09  | 12.49 | 12.14 | 12.53 | 12.89 | 0.08 |
| 709.7449 | 53.6   | 13.07 | 12.38 | 13.13 | 13.05 | 0.21 |
| 709.7528 | 41.32  | 12.97 | 12.73 | 12.51 | 12.97 | 0.29 |
| 709.7604 | 46.88  | 13.07 | 14.72 | 14.20 | 14.53 | 1.49 |
| 710.1310 | 17.66  | 10.34 | 14.08 | 13.80 | 14.26 | 1.54 |
| 710.3087 | 203.34 | 12.31 | 11.64 | 12.63 | 11.49 | 0.15 |
| 710.4740 | 290.44 | 18.21 | 17.73 | 16.21 | 16.58 | 0.60 |
| 710.5305 | 234.94 | 17.61 | 16.41 | 17.09 | 17.01 | 0.94 |
| 710.6877 | 59.65  | 18.80 | 18.98 | 19.90 | 19.61 | 1.03 |
| 710.7392 | 46.55  | 14.21 | 13.03 | 13.40 | 13.74 | 1.30 |
| 710.7587 | 47.72  | 14.07 | 15.38 | 15.27 | 15.43 | 1.64 |
| 710.8367 | 41.14  | 14.67 | 17.27 | 16.77 | 17.07 | 1.35 |
| 710.9746 | 286.62 | 17.34 | 17.13 | 15.97 | 15.97 | 0.39 |
| 711.0821 | 67.08  | 12.88 | 12.52 | 10.63 | 11.29 | 1.10 |
| 711.1200 | 17.35  | 10.98 | 13.26 | 12.78 | 13.51 | 1.14 |
| 711.2774 | 158.43 | 13.09 | 10.04 | 10.78 | 11.80 | 1.41 |
| 711.4788 | 290.02 | 17.23 | 16.89 | 15.56 | 16.30 | 0.60 |
| 711.5468 | 251.32 | 17.10 | 14.41 | 16.06 | 15.99 | 1.08 |
| 711.7006 | 59.82  | 14.09 | 11.50 | 14.11 | 13.89 | 0.86 |
| 711.7363 | 44.05  | 13.10 | 12.80 | 12.89 | 13.01 | 0.29 |
| 711.7618 | 46.99  | 13.01 | 13.02 | 12.73 | 13.27 | 0.09 |
| 711.9809 | 285.56 | 14.66 | 15.59 | 14.93 | 14.75 | 0.39 |
| 712.4932 | 286.97 | 17.31 | 19.15 | 18.94 | 18.25 | 1.20 |
| 712.6952 | 48.55  | 17.80 | 17.65 | 18.81 | 18.53 | 0.65 |
| 712.7337 | 49.76  | 13.64 | 13.48 | 13.19 | 13.43 | 0.42 |
| 712.7709 | 44.61  | 16.84 | 18.63 | 18.09 | 18.36 | 1.52 |
| 712.7964 | 47.77  | 12.25 | 12.66 | 13.04 | 13.04 | 0.48 |
| 712.8325 | 41.62  | 13.83 | 15.25 | 14.33 | 14.90 | 0.52 |
| 712.9237 | 59.09  | 12.86 | 17.31 | 10.77 | 11.77 | 0.51 |
| 712.9383 | 53.56  | 13.51 | 13.15 | 11.51 | 12.25 | 1.26 |
| 713.4774 | 284.04 | 15.12 | 15.94 | 15.08 | 15.81 | 0.25 |
| 713.4991 | 290.82 | 15.27 | 16.73 | 16.24 | 15.60 | 0.85 |
| 713.6974 | 59.76  | 13.92 | 10.39 | 12.26 | 12.54 | 1.51 |
| 713.7741 | 45.31  | 13.21 | 13.05 | 12.95 | 13.05 | 0.22 |
| 713.7844 | 40.36  | 12.75 | 12.90 | 12.85 | 13.22 | 0.16 |
| 714.5090 | 252.6  | 19.76 | 17.67 | 17.69 | 18.08 | 1.29 |
| 714.6860 | 48.41  | 13.82 | 12.22 | 12.52 | 13.08 | 1.28 |
| 714.6959 | 57.71  | 14.56 | 13.39 | 15.03 | 14.96 | 0.34 |
| 714.7318 | 55.27  | 16.14 | 16.17 | 17.29 | 17.10 | 0.66 |
| 714.7711 | 47.8   | 13.12 | 13.81 | 12.96 | 14.20 | 0.22 |
| 714.7902 | 43.29  | 16.36 | 19.36 | 18.99 | 18.96 | 1.76 |

|          |        |       |       |       |       |      |
|----------|--------|-------|-------|-------|-------|------|
| 714.9121 | 56.35  | 13.15 | 14.06 | 11.09 | 11.85 | 0.43 |
| 714.9223 | 53.19  | 12.96 | 12.79 | 10.90 | 11.56 | 1.10 |
| 715.4559 | 233.61 | 17.78 | 18.64 | 18.52 | 16.94 | 0.43 |
| 715.4937 | 293.42 | 11.83 | 12.50 | 14.76 | 14.16 | 0.49 |
| 715.5120 | 288.03 | 17.67 | 16.77 | 17.10 | 16.70 | 0.52 |
| 715.7000 | 56.14  | 13.51 | 12.77 | 13.97 | 13.73 | 0.20 |
| 715.7899 | 41.08  | 12.25 | 12.78 | 12.62 | 12.91 | 0.47 |
| 716.2783 | 212.7  | 12.53 | 12.95 | 12.45 | 12.84 | 0.18 |
| 716.4606 | 237.98 | 16.45 | 16.40 | 16.27 | 14.91 | 0.15 |
| 716.5075 | 200.84 | 14.03 | 13.16 | 13.54 | 13.25 | 0.52 |
| 716.5136 | 205.9  | 14.06 | 14.25 | 14.29 | 13.93 | 0.18 |
| 716.5247 | 289.03 | 18.21 | 16.02 | 15.93 | 16.35 | 1.19 |
| 716.6950 | 57.52  | 15.84 | 15.62 | 17.07 | 16.77 | 0.52 |
| 716.7213 | 49.75  | 13.70 | 12.42 | 12.30 | 13.00 | 1.52 |
| 716.7297 | 54.95  | 16.40 | 16.16 | 16.69 | 16.69 | 0.07 |
| 716.7855 | 42.49  | 14.74 | 17.08 | 16.93 | 16.71 | 1.59 |
| 716.9879 | 22.81  | 11.81 | 11.92 | 12.60 | 12.51 | 0.22 |
| 717.4724 | 257.88 | 22.32 | 23.66 | 23.07 | 22.58 | 0.91 |
| 717.6981 | 57.48  | 12.89 | 11.30 | 12.89 | 12.83 | 0.59 |
| 717.7461 | 47.97  | 13.52 | 16.83 | 16.47 | 16.32 | 1.91 |
| 717.7678 | 42.26  | 13.71 | 12.34 | 12.59 | 12.71 | 0.91 |
| 718.4763 | 256.36 | 21.13 | 22.09 | 21.69 | 20.95 | 0.67 |
| 718.6889 | 58.21  | 14.68 | 11.80 | 15.19 | 14.96 | 0.63 |
| 718.7198 | 55.22  | 13.82 | 12.52 | 12.83 | 12.88 | 0.80 |
| 718.7444 | 48.47  | 12.52 | 14.20 | 13.94 | 13.76 | 1.35 |
| 718.8025 | 42.51  | 14.84 | 14.65 | 14.14 | 15.03 | 0.26 |
| 718.8242 | 46.08  | 15.61 | 18.02 | 18.15 | 18.15 | 1.63 |
| 719.4727 | 272.14 | 20.74 | 20.11 | 20.03 | 20.25 | 0.33 |
| 719.4881 | 274.11 | 28.72 | 29.27 | 28.92 | 28.59 | 0.54 |
| 719.7241 | 52.82  | 13.67 | 13.24 | 13.21 | 13.36 | 0.58 |
| 719.7462 | 48.45  | 12.54 | 12.88 | 12.49 | 13.22 | 0.28 |
| 719.7928 | 40.69  | 11.82 | 12.68 | 12.14 | 12.54 | 0.44 |
| 719.8680 | 51.37  | 12.95 | 10.83 | 11.70 | 12.33 | 1.20 |
| 719.8754 | 58.71  | 15.60 | 12.66 | 15.95 | 16.21 | 0.73 |
| 720.3139 | 202.61 | 12.95 | 13.86 | 12.45 | 13.48 | 0.19 |
| 720.4752 | 270.58 | 18.67 | 17.49 | 17.13 | 17.08 | 0.64 |
| 720.4918 | 273.14 | 27.57 | 28.03 | 27.52 | 27.28 | 0.27 |
| 720.7226 | 45.55  | 13.45 | 12.97 | 13.00 | 13.38 | 0.49 |
| 720.7385 | 52.58  | 13.79 | 12.72 | 13.07 | 13.58 | 0.55 |
| 720.7604 | 43.66  | 17.32 | 18.18 | 18.24 | 18.28 | 1.39 |
| 720.7822 | 48.07  | 16.84 | 19.80 | 19.94 | 19.71 | 1.82 |
| 720.8202 | 41.65  | 10.93 | 14.98 | 14.39 | 15.21 | 1.27 |
| 720.8620 | 57.33  | 12.21 | 12.82 | 10.26 | 11.07 | 0.51 |
| 721.1009 | 17.89  | 11.48 | 13.05 | 12.50 | 12.28 | 0.72 |
| 721.3561 | 61.96  | 7.02  | 20.10 | 6.36  | 6.32  | 1.10 |
| 721.3576 | 173.5  | 6.36  | 10.98 | 11.04 | 6.11  | 1.30 |
| 721.4920 | 273.85 | 25.83 | 25.59 | 25.40 | 24.96 | 0.42 |
| 721.7652 | 41.4   | 13.59 | 13.40 | 13.07 | 13.37 | 0.32 |
| 721.7848 | 47.49  | 12.91 | 13.55 | 13.62 | 13.85 | 0.83 |
| 722.0435 | 22.33  | 15.59 | 16.90 | 16.51 | 15.81 | 0.49 |
| 722.3501 | 64.02  | 7.67  | 16.76 | 7.08  | 7.21  | 1.05 |
| 722.5008 | 266.7  | 23.97 | 22.88 | 22.86 | 22.52 | 0.90 |
| 722.6973 | 64.46  | 14.55 | 11.04 | 13.81 | 13.94 | 1.34 |
| 722.7191 | 46.76  | 19.35 | 20.41 | 20.86 | 20.65 | 1.78 |
| 722.7592 | 49.99  | 15.90 | 16.48 | 16.42 | 16.64 | 0.86 |
| 722.7799 | 48.2   | 13.20 | 15.23 | 15.43 | 15.38 | 1.57 |
| 722.9727 | 283.64 | 15.47 | 15.29 | 13.55 | 14.08 | 0.56 |
| 723.3647 | 55.89  | 7.94  | 13.07 | 7.44  | 7.72  | 0.97 |
| 723.3697 | 179.37 | 7.31  | 11.32 | 10.76 | 7.31  | 1.22 |
| 723.4812 | 287.37 | 18.45 | 18.98 | 17.33 | 17.78 | 0.13 |
| 723.4984 | 269.99 | 22.40 | 20.92 | 20.84 | 20.63 | 1.12 |
| 723.6882 | 57.58  | 12.55 | 11.53 | 13.48 | 13.28 | 0.03 |



|          |        |       |       |       |       |      |
|----------|--------|-------|-------|-------|-------|------|
| 723.7223 | 46.79  | 13.94 | 13.51 | 14.16 | 14.12 | 0.18 |
| 723.7285 | 52.24  | 14.22 | 14.19 | 14.59 | 14.83 | 0.33 |
| 723.7814 | 47.23  | 11.01 | 12.67 | 12.35 | 12.20 | 0.87 |
| 723.8818 | 49.58  | 9.66  | 12.42 | 12.45 | 12.09 | 1.46 |
| 723.9813 | 282.08 | 18.79 | 18.89 | 18.37 | 17.72 | 0.14 |
| 724.3103 | 204.45 | 12.55 | 11.69 | 11.34 | 12.21 | 0.59 |
| 724.4050 | 177.83 | 10.33 | 15.17 | 15.82 | 9.40  | 1.16 |
| 724.4857 | 282.29 | 17.22 | 18.62 | 18.15 | 17.58 | 0.66 |
| 724.4988 | 284.73 | 12.70 | 13.29 | 14.60 | 13.27 | 0.36 |
| 724.5218 | 283.12 | 19.58 | 17.12 | 16.70 | 17.03 | 1.41 |
| 724.6563 | 61.68  | 16.99 | 16.74 | 18.13 | 17.68 | 0.52 |
| 724.6821 | 50.28  | 13.28 | 11.62 | 12.29 | 12.63 | 1.18 |
| 724.6900 | 57.75  | 13.00 | 11.70 | 13.11 | 13.14 | 0.44 |
| 724.7169 | 53.95  | 18.39 | 19.20 | 19.74 | 19.51 | 1.68 |
| 724.7660 | 46.16  | 12.93 | 12.95 | 12.72 | 13.21 | 0.03 |
| 724.9882 | 287.95 | 17.28 | 18.53 | 16.93 | 16.62 | 0.23 |
| 725.1225 | 63.44  | 12.43 | 16.25 | 10.36 | 11.00 | 0.41 |
| 725.4903 | 282.9  | 15.27 | 17.81 | 16.43 | 15.42 | 0.95 |
| 725.4998 | 288.09 | 14.57 | 15.42 | 14.87 | 14.22 | 0.43 |
| 725.5333 | 292.19 | 17.05 | 16.24 | 16.08 | 16.14 | 0.80 |
| 725.6859 | 50.1   | 13.02 | 10.45 | 12.32 | 12.57 | 1.04 |
| 725.7165 | 56.66  | 14.01 | 11.69 | 12.46 | 12.68 | 1.25 |
| 725.7253 | 51.93  | 13.40 | 12.33 | 12.14 | 12.61 | 1.15 |
| 725.7332 | 48.92  | 13.11 | 14.24 | 13.87 | 13.96 | 1.11 |
| 725.7411 | 42.37  | 13.01 | 13.35 | 13.34 | 13.45 | 0.34 |
| 725.9958 | 287.29 | 13.81 | 15.42 | 15.51 | 13.66 | 0.90 |
| 726.1193 | 63.75  | 11.59 | 12.32 | 9.89  | 10.43 | 0.43 |
| 726.1324 | 55.22  | 12.20 | 12.73 | 10.29 | 10.93 | 0.62 |
| 726.5447 | 290.57 | 17.35 | 15.95 | 15.52 | 16.22 | 1.16 |
| 726.6537 | 63.24  | 14.90 | 12.69 | 16.33 | 15.74 | 0.23 |
| 726.6726 | 58.17  | 17.31 | 17.41 | 18.62 | 18.23 | 0.79 |
| 726.7144 | 55.95  | 15.49 | 14.83 | 16.15 | 15.89 | 0.03 |
| 726.7339 | 49.76  | 13.96 | 14.58 | 14.59 | 14.69 | 1.11 |
| 726.7896 | 46.84  | 14.19 | 14.12 | 13.42 | 14.13 | 0.27 |
| 726.8107 | 43.05  | 15.37 | 19.01 | 18.70 | 18.73 | 1.64 |
| 727.1182 | 63.43  | 12.13 | 12.94 | 10.88 | 11.84 | 0.07 |
| 727.5297 | 281.16 | 14.96 | 21.16 | 20.43 | 21.32 | 1.98 |
| 727.5508 | 285.6  | 16.27 | 13.91 | 13.44 | 14.19 | 1.19 |
| 727.7111 | 55.05  | 13.35 | 12.84 | 13.38 | 12.96 | 0.21 |
| 727.7340 | 49.71  | 12.92 | 12.89 | 12.62 | 12.95 | 0.16 |
| 727.7703 | 46.9   | 10.13 | 11.95 | 11.23 | 11.55 | 0.73 |
| 727.7788 | 40.61  | 10.48 | 12.96 | 11.89 | 12.73 | 0.97 |
| 727.8129 | 38.81  | 11.92 | 12.50 | 12.28 | 12.58 | 0.30 |
| 728.5303 | 278.02 | 13.17 | 18.29 | 17.64 | 18.12 | 1.76 |
| 728.6588 | 55.59  | 12.43 | 12.06 | 10.49 | 11.31 | 0.50 |
| 728.6697 | 57.94  | 16.95 | 16.49 | 17.99 | 17.64 | 0.34 |
| 728.7072 | 55.04  | 13.62 | 12.49 | 12.52 | 12.92 | 1.13 |
| 728.7257 | 50.37  | 12.38 | 11.45 | 12.34 | 13.09 | 0.19 |
| 728.7481 | 46.13  | 16.99 | 18.76 | 18.24 | 18.32 | 1.71 |
| 728.7732 | 47.09  | 12.54 | 12.60 | 12.07 | 12.53 | 0.16 |
| 728.8071 | 43.81  | 15.06 | 17.25 | 16.81 | 17.05 | 1.48 |
| 728.8896 | 53.58  | 13.16 | 13.02 | 11.02 | 11.74 | 1.02 |
| 728.9160 | 61.17  | 13.93 | 14.36 | 12.02 | 12.70 | 0.68 |
| 729.1172 | 22.1   | 15.58 | 17.06 | 16.95 | 15.72 | 0.67 |
| 729.5098 | 228.18 | 18.34 | 17.00 | 17.89 | 17.79 | 0.50 |
| 729.5368 | 286.2  | 13.81 | 15.75 | 15.00 | 15.81 | 0.94 |
| 729.7511 | 46.77  | 13.24 | 13.64 | 13.19 | 13.56 | 0.25 |
| 730.5136 | 228.21 | 17.23 | 15.68 | 16.63 | 16.94 | 0.62 |
| 730.6646 | 59.01  | 13.81 | 11.69 | 12.88 | 13.19 | 1.32 |
| 730.6801 | 63.25  | 13.92 | 10.31 | 11.48 | 11.90 | 1.66 |
| 730.7058 | 57.45  | 14.61 | 12.62 | 14.56 | 14.31 | 0.69 |
| 730.7452 | 50.85  | 14.04 | 13.89 | 13.06 | 13.84 | 0.40 |

|          |        |       |       |       |       |      |
|----------|--------|-------|-------|-------|-------|------|
| 730.7645 | 46.3   | 16.86 | 19.55 | 19.29 | 19.20 | 1.89 |
| 731.4878 | 263.69 | 20.12 | 19.72 | 20.39 | 19.99 | 0.10 |
| 731.6729 | 59.33  | 13.57 | 11.16 | 12.67 | 12.53 | 1.29 |
| 731.7672 | 42.89  | 11.71 | 13.18 | 12.87 | 13.11 | 0.80 |
| 732.4886 | 247.77 | 19.14 | 17.79 | 18.14 | 17.82 | 0.98 |
| 732.6726 | 50.69  | 12.80 | 11.16 | 12.24 | 11.99 | 0.91 |
| 732.7027 | 58.98  | 15.83 | 13.86 | 16.00 | 15.83 | 0.70 |
| 732.7618 | 44.51  | 15.35 | 17.57 | 17.43 | 17.39 | 1.75 |
| 732.7710 | 42.48  | 12.47 | 13.41 | 12.57 | 13.18 | 0.37 |
| 732.8396 | 41.09  | 13.16 | 13.93 | 14.34 | 14.63 | 0.49 |
| 733.5012 | 290.84 | 22.78 | 22.35 | 22.34 | 22.25 | 0.42 |
| 733.5273 | 226.94 | 16.72 | 15.10 | 16.02 | 16.39 | 0.89 |
| 733.5651 | 251.6  | 16.66 | 16.69 | 16.49 | 17.10 | 0.00 |
| 733.6774 | 58.9   | 11.93 | 9.75  | 13.39 | 12.69 | 0.20 |
| 733.7198 | 51.44  | 13.07 | 13.85 | 13.77 | 13.85 | 1.14 |
| 733.7277 | 44.97  | 12.70 | 12.86 | 12.65 | 13.23 | 0.15 |
| 733.7464 | 48.37  | 13.51 | 12.31 | 12.06 | 12.00 | 0.78 |
| 734.4770 | 281.75 | 18.04 | 17.95 | 17.45 | 17.91 | 0.17 |
| 734.5072 | 290.03 | 21.49 | 21.00 | 21.04 | 20.91 | 0.43 |
| 734.6984 | 57.83  | 13.88 | 12.25 | 12.86 | 13.25 | 0.96 |
| 734.7237 | 51.69  | 12.65 | 13.21 | 13.24 | 13.61 | 0.75 |
| 734.7513 | 42.69  | 12.60 | 13.11 | 13.02 | 12.92 | 0.39 |
| 734.7767 | 46.22  | 14.49 | 14.19 | 13.96 | 14.80 | 0.23 |
| 734.7975 | 47.54  | 16.20 | 18.24 | 18.45 | 18.36 | 1.78 |
| 734.9244 | 61.06  | 12.56 | 14.52 | 10.41 | 11.25 | 0.02 |
| 735.4815 | 283.57 | 19.09 | 17.92 | 17.40 | 17.66 | 0.90 |
| 735.5091 | 290.69 | 18.99 | 18.40 | 18.50 | 18.29 | 0.43 |
| 735.5426 | 253.74 | 15.37 | 15.20 | 15.58 | 14.97 | 0.02 |
| 735.6960 | 57.06  | 13.14 | 11.34 | 13.55 | 12.56 | 0.40 |
| 735.7216 | 52.7   | 11.93 | 12.60 | 12.60 | 12.82 | 0.60 |
| 735.7672 | 45.94  | 13.20 | 13.67 | 13.31 | 13.64 | 0.47 |
| 735.8504 | 57.84  | 15.03 | 10.37 | 14.68 | 15.17 | 1.09 |
| 735.9813 | 287.7  | 16.51 | 16.01 | 15.88 | 15.13 | 0.52 |
| 736.1611 | 16.92  | 11.91 | 15.52 | 14.95 | 15.43 | 1.66 |
| 736.1715 | 20.8   | 12.80 | 14.97 | 14.65 | 14.92 | 1.37 |
| 736.4927 | 261.24 | 19.08 | 18.91 | 18.35 | 18.98 | 0.32 |
| 736.5208 | 225.12 | 18.79 | 18.73 | 20.04 | 19.54 | 0.40 |
| 736.7066 | 58.16  | 12.76 | 11.69 | 12.83 | 12.80 | 0.31 |
| 736.7345 | 53.15  | 17.15 | 17.40 | 17.76 | 17.77 | 0.84 |
| 736.7567 | 50.53  | 17.12 | 19.40 | 19.73 | 19.49 | 1.83 |
| 736.7860 | 38.29  | 12.52 | 12.94 | 12.87 | 13.24 | 0.47 |
| 736.7936 | 44.37  | 14.37 | 16.73 | 16.54 | 16.67 | 1.80 |
| 736.9873 | 288.75 | 15.54 | 16.28 | 15.90 | 14.85 | 0.30 |
| 737.1646 | 19.75  | 12.48 | 13.08 | 12.76 | 13.52 | 0.63 |
| 737.3342 | 56.21  | 10.41 | 19.18 | 8.86  | 9.68  | 0.89 |
| 737.4763 | 286.72 | 14.27 | 15.85 | 14.87 | 15.67 | 0.76 |
| 737.4947 | 278.17 | 17.43 | 17.45 | 17.05 | 17.09 | 0.16 |
| 737.5252 | 219.67 | 17.45 | 17.45 | 18.85 | 18.26 | 0.44 |
| 737.7613 | 48.58  | 12.56 | 13.36 | 13.46 | 13.76 | 0.79 |
| 737.8374 | 37.12  | 11.79 | 11.48 | 12.13 | 11.68 | 0.01 |
| 738.1568 | 19.55  | 9.38  | 12.35 | 12.10 | 12.26 | 1.63 |
| 738.3273 | 64.13  | 14.97 | 20.30 | 13.55 | 13.99 | 0.76 |
| 738.4826 | 286.85 | 14.07 | 15.48 | 14.43 | 14.74 | 0.57 |
| 738.5091 | 252.47 | 21.52 | 19.12 | 20.32 | 19.20 | 1.06 |
| 738.6929 | 55.47  | 18.88 | 19.54 | 20.23 | 19.99 | 1.46 |
| 738.7343 | 53.36  | 15.82 | 15.41 | 15.94 | 16.07 | 0.15 |
| 738.7546 | 50.35  | 13.86 | 15.26 | 15.70 | 15.56 | 1.42 |
| 739.3184 | 56.59  | 12.94 | 14.31 | 10.82 | 11.53 | 0.24 |
| 739.3384 | 64.58  | 13.82 | 15.81 | 11.74 | 12.42 | 0.00 |
| 739.4564 | 219.61 | 14.14 | 15.11 | 15.28 | 13.76 | 0.48 |
| 739.4934 | 290.98 | 14.39 | 15.76 | 15.90 | 14.96 | 0.78 |
| 739.5126 | 259.07 | 20.65 | 19.26 | 20.22 | 19.52 | 0.72 |

|          |        |       |       |       |       |      |
|----------|--------|-------|-------|-------|-------|------|
| 739.6880 | 49.27  | 12.74 | 11.87 | 11.67 | 12.23 | 0.91 |
| 739.6986 | 56.28  | 13.69 | 12.63 | 13.57 | 13.68 | 0.88 |
| 739.7581 | 49.51  | 11.26 | 12.76 | 12.61 | 12.80 | 1.01 |
| 739.8498 | 47.89  | 10.75 | 11.43 | 12.15 | 11.62 | 0.60 |
| 739.8566 | 52.75  | 12.18 | 12.50 | 12.58 | 12.71 | 0.27 |
| 740.3338 | 64.62  | 11.30 | 13.65 | 9.87  | 10.18 | 0.29 |
| 740.5226 | 283.79 | 18.92 | 19.20 | 18.82 | 19.84 | 0.17 |
| 740.6228 | 64.09  | 12.15 | 10.66 | 11.52 | 11.90 | 0.74 |
| 740.6526 | 66.11  | 12.44 | 9.62  | 12.63 | 12.40 | 0.77 |
| 740.6911 | 55.61  | 18.00 | 18.49 | 19.27 | 19.01 | 1.30 |
| 740.7366 | 49.49  | 12.87 | 12.07 | 12.45 | 12.75 | 0.52 |
| 740.8221 | 42     | 14.56 | 16.46 | 15.89 | 16.59 | 1.07 |
| 741.0968 | 63.68  | 12.76 | 15.42 | 10.30 | 11.47 | 0.09 |
| 741.4722 | 233.09 | 19.35 | 19.99 | 19.95 | 18.88 | 0.53 |
| 741.5056 | 286.85 | 11.99 | 15.40 | 14.96 | 14.58 | 1.31 |
| 741.5235 | 290.7  | 17.95 | 17.50 | 16.82 | 17.49 | 0.42 |
| 741.7061 | 53.77  | 12.27 | 12.74 | 12.79 | 13.07 | 0.38 |
| 741.7142 | 46.62  | 13.05 | 12.66 | 12.80 | 13.02 | 0.36 |
| 741.8525 | 45.26  | 11.79 | 9.01  | 11.80 | 11.89 | 0.47 |
| 742.0996 | 63.75  | 12.76 | 12.84 | 10.47 | 11.09 | 0.87 |
| 742.4658 | 231.58 | 13.73 | 14.05 | 13.86 | 13.60 | 0.15 |
| 742.4836 | 290.91 | 16.79 | 16.36 | 17.17 | 16.68 | 0.03 |
| 742.5147 | 290.75 | 11.44 | 14.52 | 14.57 | 13.42 | 1.10 |
| 742.5408 | 288.35 | 19.00 | 17.04 | 17.05 | 17.24 | 1.16 |
| 742.6469 | 62.14  | 14.58 | 12.41 | 16.16 | 15.45 | 0.18 |
| 742.6895 | 57.6   | 15.07 | 14.32 | 16.15 | 15.86 | 0.15 |
| 742.7061 | 53.85  | 14.15 | 15.36 | 15.75 | 15.37 | 1.45 |
| 742.7846 | 39.14  | 16.51 | 19.90 | 19.71 | 19.67 | 1.75 |
| 743.0936 | 64.18  | 11.40 | 12.69 | 9.77  | 10.23 | 0.11 |
| 743.4885 | 261.68 | 24.14 | 25.60 | 25.53 | 25.18 | 1.20 |
| 743.6853 | 58.1   | 12.38 | 9.35  | 12.51 | 11.02 | 0.75 |
| 743.7101 | 54.37  | 12.74 | 12.82 | 13.26 | 13.11 | 0.17 |
| 743.7516 | 46.92  | 12.24 | 13.82 | 13.35 | 13.69 | 1.21 |
| 743.7602 | 40.53  | 12.06 | 13.20 | 13.01 | 13.49 | 0.97 |
| 743.7884 | 45.44  | 13.85 | 14.92 | 14.52 | 14.66 | 1.00 |
| 744.0262 | 25.27  | 14.20 | 12.17 | 12.12 | 12.53 | 1.08 |
| 744.0499 | 17.46  | 11.28 | 11.99 | 11.65 | 11.42 | 0.40 |
| 744.4575 | 217.11 | 14.23 | 16.16 | 12.75 | 13.20 | 0.16 |
| 744.4919 | 262.1  | 23.18 | 24.27 | 24.22 | 23.87 | 0.98 |
| 744.6447 | 61.57  | 14.16 | 12.00 | 15.20 | 14.64 | 0.34 |
| 744.6807 | 58.62  | 13.67 | 11.36 | 12.43 | 12.87 | 1.16 |
| 744.7220 | 48.8   | 17.19 | 18.46 | 18.13 | 18.00 | 1.68 |
| 744.7436 | 48.03  | 11.62 | 12.37 | 12.79 | 12.85 | 0.73 |
| 744.7544 | 40.82  | 12.84 | 12.98 | 12.75 | 13.12 | 0.09 |
| 744.7817 | 45.24  | 15.69 | 18.16 | 17.99 | 18.04 | 1.75 |
| 744.8910 | 62.67  | 9.64  | 13.31 | 8.85  | 9.21  | 0.86 |
| 745.4723 | 277.83 | 18.82 | 18.88 | 17.40 | 18.44 | 0.33 |
| 745.4870 | 272.3  | 21.88 | 18.97 | 18.19 | 22.19 | 0.70 |
| 745.5035 | 273.87 | 30.83 | 31.21 | 31.22 | 30.79 | 0.56 |
| 745.7264 | 44.19  | 12.78 | 13.08 | 13.04 | 13.37 | 0.38 |
| 745.7537 | 46.84  | 12.03 | 12.48 | 12.44 | 13.02 | 0.34 |
| 746.4903 | 277.72 | 20.94 | 19.11 | 18.92 | 21.23 | 0.65 |
| 746.5075 | 271.84 | 29.60 | 30.03 | 29.92 | 29.51 | 0.54 |
| 746.6564 | 68.47  | 13.19 | 10.41 | 11.80 | 12.01 | 1.49 |
| 746.7221 | 53.89  | 13.78 | 12.82 | 12.22 | 13.12 | 0.87 |
| 746.7386 | 48.88  | 17.30 | 19.25 | 19.13 | 18.96 | 2.01 |
| 746.7687 | 45.78  | 12.13 | 12.44 | 12.25 | 12.64 | 0.18 |
| 746.7932 | 40.29  | 12.40 | 12.45 | 12.48 | 13.01 | 0.13 |
| 747.1005 | 64.39  | 11.86 | 13.07 | 9.90  | 10.69 | 0.19 |
| 747.5111 | 272.27 | 27.99 | 28.03 | 27.99 | 27.75 | 0.01 |
| 747.5664 | 220.81 | 19.70 | 18.40 | 18.26 | 18.41 | 0.87 |
| 747.7417 | 49.87  | 12.43 | 13.03 | 12.85 | 13.14 | 0.48 |

|          |        |       |       |       |       |      |
|----------|--------|-------|-------|-------|-------|------|
| 747.7764 | 44.5   | 12.95 | 12.80 | 12.46 | 12.34 | 0.21 |
| 748.5202 | 264.69 | 25.54 | 25.11 | 25.35 | 24.90 | 0.41 |
| 748.5632 | 219.4  | 20.92 | 17.20 | 16.88 | 17.27 | 1.97 |
| 748.6765 | 63.09  | 14.50 | 11.65 | 15.23 | 14.66 | 0.65 |
| 748.7360 | 47.19  | 14.52 | 15.32 | 15.15 | 15.23 | 1.76 |
| 748.7442 | 42.93  | 14.02 | 13.84 | 13.75 | 13.99 | 0.23 |
| 748.8132 | 41.97  | 14.08 | 15.49 | 15.23 | 15.94 | 0.69 |
| 749.0689 | 22.54  | 12.32 | 10.94 | 10.53 | 10.97 | 0.62 |
| 749.5222 | 265.66 | 22.74 | 22.25 | 22.47 | 22.09 | 0.38 |
| 749.5656 | 213.59 | 19.69 | 13.30 | 12.26 | 13.71 | 1.94 |
| 749.6938 | 55.69  | 12.43 | 12.52 | 13.18 | 13.05 | 0.46 |
| 750.5371 | 275.46 | 20.66 | 18.77 | 18.35 | 18.80 | 1.00 |
| 750.5670 | 254.82 | 19.71 | 18.05 | 17.66 | 19.13 | 1.25 |
| 750.6671 | 62.6   | 13.09 | 10.55 | 12.32 | 12.48 | 1.14 |
| 750.6961 | 55.73  | 12.63 | 13.49 | 14.35 | 14.13 | 0.96 |
| 750.7454 | 47.45  | 13.84 | 13.75 | 13.40 | 14.18 | 0.11 |
| 750.7718 | 49.02  | 16.15 | 17.85 | 18.23 | 18.12 | 1.72 |
| 750.8883 | 54.48  | 13.35 | 14.37 | 11.34 | 12.24 | 0.34 |
| 750.8966 | 61.44  | 13.30 | 15.71 | 11.20 | 12.02 | 0.12 |
| 751.5685 | 256.98 | 18.56 | 16.81 | 16.35 | 18.73 | 1.11 |
| 751.6925 | 56.44  | 11.81 | 11.81 | 13.77 | 13.20 | 0.53 |
| 751.7393 | 47.42  | 12.30 | 14.00 | 13.61 | 13.80 | 1.17 |
| 751.7476 | 41.02  | 12.96 | 12.83 | 13.05 | 13.51 | 0.04 |
| 752.4379 | 189.54 | 7.99  | 13.20 | 15.01 | 7.00  | 1.28 |
| 752.5256 | 204.56 | 12.90 | 13.97 | 13.46 | 14.04 | 0.59 |
| 752.5477 | 286.79 | 16.66 | 16.62 | 16.74 | 16.79 | 0.02 |
| 752.5601 | 285.38 | 16.59 | 15.23 | 14.90 | 15.05 | 1.11 |
| 752.6668 | 60.36  | 12.41 | 10.74 | 12.19 | 12.21 | 0.68 |
| 752.7077 | 55.52  | 16.55 | 16.22 | 16.96 | 16.94 | 0.07 |
| 752.7345 | 52.31  | 15.71 | 17.01 | 17.58 | 17.42 | 1.60 |
| 752.7581 | 43.11  | 11.88 | 12.71 | 12.30 | 12.34 | 0.48 |
| 752.7693 | 46.9   | 13.52 | 14.71 | 14.44 | 14.78 | 1.40 |
| 752.8997 | 46.98  | 12.41 | 12.70 | 10.33 | 11.25 | 0.69 |
| 753.3064 | 56.55  | 12.41 | 20.46 | 10.51 | 11.04 | 0.79 |
| 753.5095 | 287.9  | 16.10 | 17.87 | 14.35 | 13.42 | 0.06 |
| 753.5474 | 287.45 | 13.06 | 16.07 | 16.15 | 16.99 | 1.32 |
| 753.7348 | 51.07  | 13.20 | 12.78 | 12.96 | 13.16 | 0.37 |
| 753.8057 | 36.64  | 12.29 | 12.42 | 12.59 | 11.92 | 0.08 |
| 754.3067 | 56.7   | 13.20 | 19.79 | 11.04 | 11.76 | 0.67 |
| 754.5078 | 293.97 | 12.34 | 14.22 | 12.39 | 10.99 | 0.27 |
| 754.6666 | 56.52  | 17.85 | 18.12 | 19.25 | 18.93 | 0.94 |
| 754.6897 | 60.75  | 12.96 | 12.24 | 13.69 | 13.53 | 0.00 |
| 754.7102 | 55.29  | 15.57 | 14.97 | 15.89 | 15.81 | 0.18 |
| 754.7191 | 46.38  | 12.99 | 12.68 | 13.43 | 13.58 | 0.07 |
| 754.7272 | 46.26  | 14.08 | 14.35 | 15.20 | 14.95 | 0.75 |
| 754.7355 | 51.31  | 13.99 | 14.08 | 14.48 | 14.50 | 0.26 |
| 754.7578 | 44.67  | 12.90 | 13.17 | 13.00 | 13.51 | 0.22 |
| 755.2927 | 64.52  | 12.82 | 16.08 | 10.77 | 11.38 | 0.30 |
| 755.3122 | 56.93  | 13.73 | 15.21 | 11.87 | 12.61 | 0.10 |
| 755.4876 | 269.36 | 16.20 | 16.12 | 15.65 | 16.59 | 0.12 |
| 755.6714 | 58.87  | 13.04 | 11.53 | 12.59 | 12.73 | 0.77 |
| 755.7538 | 46.29  | 12.08 | 12.96 | 12.62 | 12.52 | 0.42 |
| 755.8303 | 49.67  | 10.99 | 11.13 | 12.11 | 11.96 | 0.35 |
| 756.1549 | 23.18  | 15.37 | 15.53 | 14.74 | 13.88 | 0.14 |
| 756.3049 | 64.71  | 13.60 | 14.96 | 11.70 | 12.42 | 0.17 |
| 756.4912 | 254.03 | 15.43 | 15.59 | 14.93 | 14.61 | 0.11 |
| 756.6648 | 56.58  | 16.94 | 17.25 | 18.40 | 18.07 | 0.91 |
| 756.7977 | 44.7   | 15.40 | 17.55 | 17.38 | 17.56 | 1.58 |
| 756.8185 | 44.05  | 12.40 | 13.98 | 13.48 | 13.73 | 0.95 |
| 757.5020 | 267.81 | 20.32 | 19.54 | 20.96 | 20.14 | 0.13 |
| 757.6798 | 57.04  | 12.53 | 12.18 | 12.31 | 12.71 | 0.19 |
| 757.8227 | 46.45  | 11.65 | 8.90  | 12.00 | 12.04 | 0.46 |

|          |        |       |       |       |       |      |
|----------|--------|-------|-------|-------|-------|------|
| 757.8322 | 53.07  | 12.69 | 9.44  | 12.66 | 13.01 | 0.64 |
| 758.5032 | 255.38 | 19.70 | 18.34 | 19.13 | 18.71 | 0.96 |
| 758.6620 | 50.06  | 14.02 | 11.62 | 12.72 | 13.01 | 1.30 |
| 758.6801 | 56.85  | 13.29 | 12.08 | 13.09 | 13.09 | 0.69 |
| 758.7585 | 46.78  | 17.40 | 20.25 | 20.15 | 20.04 | 1.88 |
| 759.5104 | 292.92 | 21.46 | 20.01 | 20.76 | 20.43 | 0.70 |
| 759.5788 | 255.96 | 17.14 | 16.91 | 17.21 | 17.66 | 0.01 |
| 759.6809 | 57.2   | 12.66 | 10.91 | 13.87 | 12.83 | 0.18 |
| 759.7259 | 48.72  | 12.07 | 14.74 | 14.32 | 14.51 | 1.68 |
| 759.7610 | 46.18  | 13.84 | 14.29 | 14.07 | 14.36 | 0.46 |
| 759.7691 | 40.37  | 12.91 | 13.25 | 13.15 | 13.64 | 0.34 |
| 760.5171 | 266.54 | 20.56 | 19.42 | 19.90 | 20.26 | 0.70 |
| 760.5513 | 196.78 | 14.58 | 14.09 | 14.09 | 13.65 | 0.41 |
| 760.5823 | 256.86 | 14.89 | 14.14 | 14.33 | 15.44 | 0.25 |
| 760.6866 | 48.09  | 13.86 | 13.78 | 13.81 | 13.76 | 0.07 |
| 760.6962 | 53.89  | 17.18 | 17.78 | 17.91 | 17.71 | 1.12 |
| 760.7298 | 43.14  | 12.09 | 13.02 | 12.86 | 13.08 | 0.77 |
| 760.7559 | 46.99  | 16.36 | 18.68 | 18.63 | 18.56 | 1.87 |
| 761.4797 | 288.61 | 15.29 | 16.38 | 15.32 | 16.62 | 0.47 |
| 761.5276 | 292.44 | 16.97 | 16.83 | 15.55 | 17.35 | 0.32 |
| 761.5389 | 288.72 | 15.25 | 16.99 | 16.23 | 16.86 | 0.99 |
| 761.5965 | 286.75 | 17.72 | 16.83 | 16.99 | 18.47 | 0.32 |
| 761.6998 | 54.14  | 13.26 | 13.23 | 13.25 | 12.75 | 0.09 |
| 761.7279 | 49.65  | 11.80 | 13.15 | 13.03 | 12.94 | 1.04 |
| 761.7620 | 46.4   | 11.14 | 12.81 | 12.70 | 13.04 | 0.78 |
| 762.5083 | 264.12 | 22.99 | 23.28 | 22.61 | 22.38 | 0.05 |
| 762.5314 | 236.53 | 17.64 | 16.53 | 16.65 | 16.32 | 0.64 |
| 762.5982 | 280.91 | 16.36 | 15.27 | 15.96 | 17.46 | 0.28 |
| 762.6940 | 57.5   | 14.43 | 13.16 | 13.22 | 13.48 | 1.02 |
| 762.7124 | 52.17  | 17.16 | 18.49 | 18.69 | 18.46 | 1.96 |
| 762.7433 | 46.98  | 12.60 | 12.58 | 12.56 | 13.02 | 0.02 |
| 762.7713 | 40.54  | 11.28 | 13.26 | 13.01 | 13.32 | 1.15 |
| 763.0772 | 64.45  | 13.33 | 13.96 | 11.27 | 12.10 | 0.56 |
| 763.4902 | 284.13 | 13.20 | 16.96 | 15.74 | 15.75 | 1.29 |
| 763.5107 | 268.16 | 22.06 | 22.06 | 21.41 | 20.45 | 0.24 |
| 763.5340 | 220.88 | 16.12 | 15.55 | 15.83 | 15.05 | 0.40 |
| 763.5413 | 214.21 | 15.15 | 14.27 | 14.53 | 14.12 | 0.53 |
| 763.7450 | 47.51  | 12.34 | 12.75 | 12.40 | 12.77 | 0.16 |
| 764.4963 | 280.79 | 12.47 | 15.38 | 14.92 | 14.76 | 1.16 |
| 764.5218 | 261.65 | 21.16 | 20.48 | 20.02 | 20.12 | 0.68 |
| 764.5471 | 243.97 | 18.98 | 17.53 | 17.35 | 17.30 | 0.89 |
| 764.6497 | 66.1   | 12.89 | 10.53 | 13.71 | 12.79 | 0.49 |
| 764.7005 | 42.9   | 13.57 | 13.01 | 13.39 | 13.26 | 0.50 |
| 764.7118 | 51.4   | 14.41 | 14.79 | 14.88 | 14.98 | 1.22 |
| 764.7875 | 42.77  | 14.44 | 16.83 | 15.93 | 16.68 | 1.13 |
| 764.9363 | 57.38  | 12.39 | 12.37 | 10.17 | 11.23 | 0.78 |
| 765.0838 | 22.35  | 10.97 | 13.47 | 11.23 | 11.69 | 0.69 |
| 765.4714 | 226.09 | 18.83 | 19.80 | 19.74 | 18.66 | 0.77 |
| 765.5269 | 260.39 | 19.89 | 18.81 | 18.68 | 18.35 | 0.73 |
| 765.5506 | 232    | 17.49 | 15.74 | 16.46 | 15.53 | 0.88 |
| 765.6691 | 58.16  | 12.55 | 11.02 | 12.42 | 12.42 | 0.60 |
| 766.1076 | 18.07  | 12.96 | 17.03 | 16.68 | 15.43 | 1.53 |
| 766.4751 | 225.66 | 17.00 | 18.39 | 18.30 | 17.07 | 0.91 |
| 766.5400 | 253.94 | 21.12 | 18.82 | 19.01 | 18.49 | 1.27 |
| 766.6681 | 58.23  | 11.34 | 9.86  | 12.81 | 12.07 | 0.04 |
| 766.7285 | 48.3   | 12.95 | 12.55 | 11.93 | 11.88 | 0.44 |
| 766.7472 | 51.18  | 15.77 | 17.02 | 17.52 | 17.44 | 1.62 |
| 766.7992 | 41.51  | 11.04 | 13.67 | 13.05 | 12.76 | 1.08 |
| 766.8592 | 55.52  | 11.66 | 13.27 | 9.88  | 10.49 | 0.04 |
| 766.8678 | 59.87  | 11.77 | 15.26 | 10.05 | 10.75 | 0.44 |
| 766.8764 | 62.24  | 11.54 | 14.95 | 9.92  | 10.47 | 0.48 |
| 767.1100 | 17.35  | 7.66  | 12.54 | 11.94 | 10.10 | 1.29 |

|          |        |       |       |       |       |      |
|----------|--------|-------|-------|-------|-------|------|
| 767.4877 | 259.19 | 23.42 | 25.14 | 24.77 | 24.31 | 1.23 |
| 767.5433 | 255.43 | 19.95 | 17.66 | 17.64 | 17.40 | 1.14 |
| 767.6676 | 58.35  | 11.22 | 9.86  | 12.25 | 11.39 | 0.11 |
| 767.7148 | 50.89  | 12.97 | 13.02 | 12.87 | 13.26 | 0.02 |
| 768.4913 | 259.66 | 22.16 | 23.93 | 23.46 | 23.12 | 1.19 |
| 768.5406 | 286.27 | 16.85 | 14.48 | 14.62 | 15.88 | 1.06 |
| 768.6823 | 57.46  | 15.25 | 13.95 | 15.88 | 15.69 | 0.30 |
| 768.7034 | 55.07  | 14.81 | 15.35 | 16.25 | 16.04 | 1.16 |
| 768.7435 | 49.32  | 13.84 | 14.40 | 14.31 | 14.61 | 0.95 |
| 768.8641 | 60.82  | 11.36 | 14.71 | 9.70  | 10.36 | 0.42 |
| 768.8724 | 56.7   | 12.62 | 13.48 | 10.44 | 11.11 | 0.46 |
| 769.5012 | 267.99 | 28.32 | 29.30 | 29.09 | 28.70 | 0.96 |
| 769.6908 | 56.2   | 12.08 | 11.28 | 12.63 | 12.32 | 0.08 |
| 769.7083 | 54.47  | 12.36 | 12.61 | 12.64 | 12.86 | 0.25 |
| 769.7572 | 46.58  | 12.41 | 12.69 | 12.47 | 12.87 | 0.21 |
| 769.7829 | 38.07  | 12.63 | 11.75 | 12.16 | 11.90 | 0.36 |
| 770.5053 | 266.24 | 27.35 | 28.12 | 27.76 | 27.48 | 0.82 |
| 770.6404 | 58.71  | 15.51 | 14.39 | 16.91 | 16.50 | 0.07 |
| 770.6607 | 61.08  | 14.53 | 11.91 | 14.76 | 14.06 | 0.92 |
| 770.6828 | 57.55  | 14.88 | 13.31 | 14.87 | 14.67 | 0.79 |
| 770.7038 | 55.46  | 14.17 | 13.57 | 14.58 | 14.55 | 0.11 |
| 770.7325 | 47.34  | 12.52 | 12.81 | 13.02 | 12.99 | 0.35 |
| 770.8386 | 38.98  | 12.14 | 12.59 | 12.38 | 13.08 | 0.37 |
| 771.5159 | 271.25 | 27.45 | 27.60 | 27.76 | 27.57 | 0.32 |
| 771.7337 | 47.88  | 10.59 | 13.20 | 12.38 | 13.19 | 1.28 |
| 772.5210 | 268.56 | 26.06 | 26.34 | 26.65 | 26.30 | 0.45 |
| 772.5520 | 221.87 | 18.87 | 16.54 | 15.99 | 16.13 | 1.51 |
| 772.6398 | 59.13  | 14.09 | 12.22 | 14.67 | 14.53 | 0.39 |
| 772.7373 | 47.44  | 10.59 | 12.80 | 11.90 | 12.61 | 0.95 |
| 772.7744 | 46.8   | 15.85 | 17.74 | 17.60 | 17.69 | 1.65 |
| 772.7956 | 45.96  | 13.66 | 15.51 | 15.40 | 15.50 | 1.53 |
| 773.5285 | 265.7  | 25.32 | 25.22 | 25.12 | 25.27 | 0.14 |
| 774.5668 | 243.15 | 20.89 | 17.73 | 16.80 | 18.67 | 1.67 |
| 774.6584 | 59.72  | 12.24 | 10.87 | 13.46 | 12.11 | 0.13 |
| 774.7322 | 49.24  | 17.81 | 20.09 | 20.15 | 19.94 | 1.96 |
| 774.7719 | 47.19  | 13.67 | 13.96 | 13.28 | 14.21 | 0.04 |
| 775.5700 | 242.26 | 19.82 | 15.84 | 13.73 | 16.90 | 1.79 |
| 775.6129 | 291.51 | 17.20 | 16.63 | 17.22 | 18.38 | 0.10 |
| 775.7013 | 53.14  | 12.15 | 12.34 | 12.58 | 12.43 | 0.30 |
| 775.7274 | 42.58  | 12.61 | 12.45 | 12.16 | 12.52 | 0.29 |
| 775.7375 | 48.51  | 13.83 | 15.10 | 15.08 | 14.99 | 1.21 |
| 776.5453 | 241.26 | 24.31 | 21.95 | 22.01 | 22.00 | 1.19 |
| 776.5824 | 257.2  | 17.38 | 15.60 | 14.93 | 18.26 | 0.67 |
| 776.6717 | 57.43  | 16.55 | 16.44 | 17.60 | 17.35 | 0.59 |
| 776.6997 | 53.38  | 12.86 | 12.34 | 12.24 | 12.41 | 0.81 |
| 776.7300 | 49.17  | 16.74 | 18.68 | 18.80 | 18.66 | 1.86 |
| 777.5023 | 282.07 | 12.90 | 17.35 | 9.43  | 9.58  | 0.10 |
| 777.5485 | 240.53 | 22.55 | 21.58 | 21.62 | 20.90 | 0.56 |
| 777.6723 | 58.29  | 12.94 | 12.19 | 13.15 | 12.88 | 0.26 |
| 777.7407 | 47.26  | 12.88 | 12.75 | 12.71 | 12.69 | 0.17 |
| 778.5053 | 289.23 | 15.19 | 16.36 | 15.02 | 15.15 | 0.32 |
| 778.5566 | 250.25 | 21.64 | 21.24 | 21.34 | 20.50 | 0.26 |
| 778.5973 | 264.38 | 13.14 | 18.51 | 18.78 | 17.59 | 2.20 |
| 778.6671 | 61.44  | 13.77 | 11.85 | 13.01 | 13.11 | 1.18 |
| 778.6846 | 55.37  | 14.87 | 15.28 | 15.85 | 15.57 | 1.25 |
| 778.6935 | 47.52  | 14.61 | 14.19 | 15.17 | 14.96 | 0.08 |
| 778.7255 | 51.78  | 13.24 | 12.47 | 12.52 | 13.10 | 0.64 |
| 778.7473 | 46.6   | 13.15 | 14.50 | 14.13 | 14.37 | 1.30 |
| 779.4877 | 288.19 | 13.69 | 16.33 | 15.44 | 16.03 | 0.95 |
| 779.5004 | 210.42 | 9.41  | 12.22 | 13.92 | 9.04  | 0.87 |
| 779.5238 | 282.78 | 19.80 | 20.03 | 19.98 | 19.53 | 0.11 |
| 779.5627 | 241.28 | 19.85 | 17.58 | 17.87 | 18.55 | 0.92 |

|          |        |       |       |       |       |      |
|----------|--------|-------|-------|-------|-------|------|
| 779.6010 | 262.82 | 12.88 | 16.77 | 17.25 | 15.68 | 1.99 |
| 780.4812 | 202.12 | 11.35 | 14.64 | 14.61 | 13.11 | 1.19 |
| 780.4900 | 206.36 | 10.42 | 13.72 | 12.99 | 12.11 | 1.07 |
| 780.5130 | 288.01 | 14.17 | 15.42 | 15.14 | 14.81 | 0.89 |
| 780.5249 | 283.76 | 18.63 | 19.20 | 19.06 | 18.71 | 0.39 |
| 780.5667 | 222.48 | 17.75 | 15.87 | 16.20 | 16.94 | 0.82 |
| 780.6733 | 55.28  | 13.42 | 12.86 | 13.68 | 13.54 | 0.27 |
| 780.6816 | 54.71  | 14.98 | 15.17 | 15.81 | 15.66 | 0.96 |
| 780.7533 | 38.15  | 13.01 | 13.42 | 12.85 | 13.42 | 0.20 |
| 780.7610 | 43.68  | 14.99 | 17.46 | 16.83 | 17.27 | 1.49 |
| 780.9089 | 52.17  | 9.01  | 12.80 | 8.22  | 8.67  | 0.79 |
| 781.5027 | 265.81 | 19.06 | 18.72 | 18.25 | 17.86 | 0.42 |
| 781.7586 | 46.42  | 11.66 | 12.89 | 12.67 | 12.93 | 0.89 |
| 782.4991 | 243.26 | 19.68 | 19.13 | 19.33 | 19.11 | 0.39 |
| 782.6972 | 55.99  | 13.37 | 12.46 | 13.79 | 13.30 | 0.23 |
| 782.7094 | 48.19  | 13.03 | 11.96 | 12.43 | 12.45 | 0.75 |
| 782.7187 | 54.15  | 14.19 | 13.62 | 14.46 | 14.47 | 0.20 |
| 782.7688 | 38.31  | 12.64 | 12.74 | 13.09 | 13.27 | 0.24 |
| 782.7763 | 43.7   | 14.10 | 17.21 | 16.62 | 16.59 | 1.59 |
| 782.8437 | 61.09  | 11.41 | 14.17 | 9.72  | 10.27 | 0.31 |
| 783.5140 | 285.89 | 22.17 | 20.99 | 22.35 | 21.55 | 0.46 |
| 783.6908 | 55.04  | 11.19 | 12.82 | 12.99 | 13.02 | 1.01 |
| 784.5200 | 280.89 | 20.85 | 19.70 | 20.83 | 20.07 | 0.56 |
| 784.6679 | 49.68  | 12.95 | 11.60 | 12.55 | 12.64 | 0.52 |
| 784.6767 | 56.28  | 14.42 | 13.41 | 14.79 | 14.55 | 0.41 |
| 784.7164 | 47.16  | 14.19 | 13.33 | 13.50 | 13.84 | 1.32 |
| 784.7711 | 42.96  | 12.40 | 12.91 | 13.04 | 13.36 | 0.57 |
| 785.4739 | 177.32 | 13.21 | 15.47 | 15.48 | 13.81 | 0.77 |
| 785.5206 | 287.08 | 18.19 | 17.32 | 17.48 | 17.24 | 0.60 |
| 785.5386 | 288.42 | 13.36 | 14.39 | 14.19 | 14.09 | 0.57 |
| 785.6847 | 55.77  | 12.97 | 11.80 | 12.94 | 13.19 | 0.42 |
| 785.7338 | 47.59  | 11.02 | 12.87 | 12.82 | 12.77 | 1.37 |
| 786.5196 | 257.8  | 22.75 | 20.86 | 20.56 | 23.22 | 0.99 |
| 786.5644 | 206.47 | 15.02 | 15.62 | 15.13 | 14.34 | 0.14 |
| 786.6686 | 49.28  | 12.26 | 11.55 | 11.75 | 12.07 | 0.38 |
| 786.6775 | 57.03  | 13.39 | 12.48 | 13.23 | 13.30 | 0.47 |
| 786.7353 | 47.04  | 12.57 | 12.93 | 12.77 | 13.10 | 0.28 |
| 786.7920 | 40.46  | 12.32 | 12.46 | 12.01 | 13.54 | 0.05 |
| 786.8019 | 39.13  | 11.62 | 12.22 | 11.82 | 12.41 | 0.37 |
| 786.8109 | 45.29  | 13.45 | 13.69 | 13.72 | 14.09 | 0.37 |
| 787.5225 | 257.07 | 21.74 | 19.81 | 19.98 | 22.01 | 0.97 |
| 788.5346 | 257.57 | 23.24 | 22.69 | 22.72 | 22.21 | 0.41 |
| 788.5817 | 205.46 | 16.35 | 16.00 | 15.97 | 15.59 | 0.42 |
| 788.5909 | 198.18 | 14.79 | 14.71 | 14.37 | 14.09 | 0.24 |
| 788.7487 | 48.24  | 15.97 | 17.53 | 17.48 | 17.51 | 1.67 |
| 788.7694 | 47.42  | 13.17 | 16.01 | 16.02 | 15.96 | 1.72 |
| 789.4710 | 216.93 | 16.25 | 17.44 | 17.71 | 16.43 | 0.79 |
| 789.5457 | 255.16 | 21.05 | 19.14 | 19.21 | 19.74 | 1.10 |
| 789.5880 | 196.27 | 14.99 | 14.37 | 14.41 | 13.85 | 0.64 |
| 790.4766 | 221    | 13.71 | 14.40 | 15.13 | 13.86 | 0.45 |
| 790.5024 | 201.26 | 15.14 | 14.80 | 14.72 | 14.61 | 0.34 |
| 790.5098 | 292.44 | 19.11 | 21.02 | 20.90 | 20.09 | 0.91 |
| 790.5546 | 258.9  | 23.25 | 22.67 | 22.55 | 22.18 | 0.59 |
| 790.7061 | 51.76  | 17.83 | 19.51 | 19.83 | 19.57 | 1.93 |
| 790.7481 | 48.03  | 13.54 | 13.93 | 13.43 | 14.47 | 0.20 |
| 790.7680 | 46.85  | 12.05 | 13.19 | 13.34 | 13.50 | 1.00 |
| 791.4872 | 231.5  | 21.94 | 22.68 | 22.75 | 22.12 | 0.88 |
| 791.5198 | 293.98 | 15.67 | 18.65 | 19.16 | 16.87 | 0.93 |
| 791.5597 | 259.28 | 22.29 | 21.40 | 21.50 | 20.83 | 0.59 |
| 791.6795 | 55.93  | 12.21 | 11.77 | 13.25 | 12.76 | 0.19 |
| 791.7089 | 51.97  | 12.75 | 13.11 | 13.28 | 13.64 | 0.46 |
| 792.4911 | 231.01 | 20.81 | 21.56 | 21.67 | 20.94 | 0.87 |

|          |        |       |       |       |       |      |
|----------|--------|-------|-------|-------|-------|------|
| 792.5699 | 255.64 | 21.05 | 19.32 | 19.53 | 19.48 | 0.88 |
| 792.6455 | 59.12  | 14.35 | 13.42 | 15.17 | 14.94 | 0.08 |
| 792.6514 | 51.82  | 13.77 | 12.76 | 14.34 | 14.20 | 0.25 |
| 792.6754 | 56.36  | 12.53 | 11.72 | 12.16 | 12.28 | 0.63 |
| 792.7041 | 52.02  | 16.79 | 18.25 | 18.63 | 18.35 | 1.77 |
| 792.7503 | 47.36  | 9.20  | 12.63 | 12.45 | 11.99 | 1.34 |
| 793.1012 | 62.17  | 12.19 | 12.27 | 10.08 | 10.90 | 0.76 |
| 793.1132 | 54.04  | 12.15 | 13.15 | 10.14 | 10.96 | 0.32 |
| 793.5004 | 255.23 | 27.47 | 26.67 | 27.21 | 26.61 | 0.34 |
| 793.7159 | 49.2   | 11.61 | 12.64 | 12.74 | 12.89 | 0.96 |
| 794.5043 | 257.64 | 26.26 | 25.64 | 25.56 | 25.49 | 0.41 |
| 794.6469 | 61.88  | 12.54 | 11.66 | 11.77 | 11.98 | 0.81 |
| 794.6529 | 49.89  | 13.03 | 12.41 | 13.41 | 12.90 | 0.22 |
| 794.6635 | 57.17  | 15.61 | 15.82 | 16.89 | 16.53 | 0.80 |
| 794.7010 | 55.22  | 13.14 | 12.14 | 12.42 | 12.64 | 0.69 |
| 794.7191 | 48.46  | 11.16 | 12.85 | 12.76 | 12.91 | 1.27 |
| 794.7987 | 43.08  | 13.52 | 15.87 | 15.42 | 15.63 | 1.32 |
| 795.5147 | 268.75 | 28.15 | 28.84 | 28.69 | 28.12 | 0.80 |
| 796.5191 | 269.33 | 26.95 | 27.62 | 27.37 | 26.88 | 0.73 |
| 796.6528 | 56.97  | 13.71 | 12.75 | 13.78 | 13.72 | 0.77 |
| 796.6648 | 50.8   | 13.32 | 12.51 | 12.67 | 12.99 | 0.94 |
| 796.7254 | 38.91  | 12.48 | 13.22 | 12.85 | 13.28 | 0.49 |
| 796.7420 | 45.29  | 13.76 | 15.88 | 15.27 | 15.80 | 1.44 |
| 796.7946 | 43.55  | 11.67 | 12.81 | 11.99 | 12.86 | 0.44 |
| 796.8855 | 60.67  | 12.55 | 12.53 | 10.62 | 11.21 | 0.96 |
| 797.5234 | 267.31 | 25.21 | 25.19 | 25.14 | 24.51 | 0.17 |
| 797.7344 | 47.02  | 11.83 | 12.80 | 12.57 | 13.22 | 0.82 |
| 798.5309 | 267.45 | 22.87 | 22.47 | 22.54 | 21.88 | 0.50 |
| 798.5663 | 241.46 | 21.52 | 18.70 | 18.42 | 18.99 | 1.77 |
| 798.6921 | 56.15  | 13.62 | 12.55 | 14.14 | 14.07 | 0.24 |
| 798.7512 | 45.9   | 13.95 | 15.73 | 15.29 | 15.47 | 1.58 |
| 798.7602 | 39.8   | 13.70 | 14.61 | 13.93 | 14.42 | 0.56 |
| 799.5512 | 262.01 | 21.86 | 20.00 | 19.94 | 19.88 | 1.51 |
| 799.6609 | 57.92  | 11.43 | 11.15 | 12.05 | 12.22 | 0.16 |
| 800.5459 | 258.03 | 20.81 | 20.64 | 20.94 | 20.05 | 0.10 |
| 800.5793 | 238.79 | 19.43 | 15.07 | 14.47 | 16.98 | 1.78 |
| 800.6539 | 49.23  | 12.76 | 11.18 | 12.38 | 12.51 | 0.76 |
| 800.6920 | 55.71  | 13.46 | 13.05 | 13.40 | 13.49 | 0.20 |
| 800.7485 | 45.01  | 12.16 | 13.95 | 13.57 | 14.10 | 1.26 |
| 801.5489 | 245.16 | 18.79 | 18.54 | 18.67 | 18.04 | 0.18 |
| 801.5852 | 247.66 | 16.68 | 13.29 | 12.71 | 15.03 | 1.56 |
| 801.7115 | 49.86  | 11.54 | 13.08 | 12.64 | 12.76 | 0.90 |
| 802.5600 | 279.32 | 21.15 | 21.16 | 20.79 | 20.86 | 0.14 |
| 802.5985 | 247.52 | 14.24 | 17.90 | 18.59 | 17.40 | 1.59 |
| 802.7663 | 44.11  | 12.63 | 12.68 | 12.61 | 13.29 | 0.05 |
| 802.7867 | 46.91  | 13.63 | 14.10 | 14.20 | 14.51 | 0.85 |
| 803.6004 | 243.31 | 13.52 | 17.48 | 17.38 | 16.87 | 1.82 |
| 803.8408 | 51.89  | 12.93 | 10.57 | 12.07 | 13.05 | 0.85 |
| 804.5111 | 289.08 | 12.11 | 14.04 | 13.51 | 14.54 | 0.75 |
| 804.5234 | 283.35 | 14.58 | 16.36 | 15.49 | 16.42 | 0.96 |
| 804.5743 | 241.14 | 22.13 | 20.56 | 20.55 | 21.02 | 1.15 |
| 804.6122 | 264.91 | 14.24 | 16.58 | 17.65 | 15.60 | 1.19 |
| 804.6214 | 269.31 | 9.13  | 12.95 | 13.72 | 11.95 | 1.21 |
| 804.7134 | 44.51  | 12.99 | 12.46 | 12.28 | 12.77 | 0.75 |
| 804.7218 | 50.49  | 15.78 | 16.86 | 16.89 | 16.93 | 1.36 |
| 804.7409 | 42.16  | 13.67 | 15.71 | 15.92 | 15.73 | 1.76 |
| 804.7806 | 36.78  | 12.71 | 12.76 | 12.36 | 13.06 | 0.06 |
| 805.4983 | 192.98 | 7.90  | 12.11 | 12.05 | 11.66 | 1.50 |
| 805.5063 | 225.91 | 12.68 | 14.94 | 15.33 | 14.58 | 0.86 |
| 805.5798 | 244.26 | 20.98 | 19.08 | 18.99 | 19.35 | 1.45 |
| 806.4979 | 249.54 | 20.89 | 19.79 | 20.12 | 20.09 | 0.79 |
| 806.5331 | 294.21 | 13.23 | 15.48 | 15.29 | 13.80 | 0.88 |



|          |        |       |       |       |       |      |
|----------|--------|-------|-------|-------|-------|------|
| 806.5842 | 268.52 | 17.21 | 16.38 | 16.32 | 15.92 | 0.59 |
| 806.6285 | 298.05 | 11.96 | 12.14 | 12.78 | 13.54 | 0.34 |
| 806.6805 | 54.36  | 17.41 | 18.57 | 19.20 | 18.94 | 1.65 |
| 806.7422 | 48.26  | 12.29 | 13.69 | 13.89 | 13.87 | 1.37 |
| 806.7511 | 41.82  | 12.35 | 12.89 | 12.68 | 12.64 | 0.49 |
| 807.0990 | 17.63  | 10.73 | 12.39 | 11.86 | 12.83 | 1.01 |
| 807.5079 | 259.44 | 22.03 | 19.99 | 20.47 | 20.10 | 1.01 |
| 807.5892 | 202.82 | 17.03 | 15.14 | 15.07 | 14.50 | 1.41 |
| 807.6840 | 55.36  | 12.02 | 12.49 | 12.73 | 12.67 | 0.53 |
| 808.5154 | 252.9  | 21.47 | 19.65 | 20.65 | 20.03 | 1.15 |
| 808.5503 | 199.46 | 14.18 | 14.27 | 13.88 | 13.64 | 0.12 |
| 808.6166 | 61.68  | 13.73 | 12.16 | 14.71 | 14.25 | 0.24 |
| 808.6475 | 58.04  | 12.11 | 10.32 | 12.07 | 11.79 | 0.69 |
| 808.6783 | 54.7   | 16.55 | 17.55 | 18.23 | 17.93 | 1.56 |
| 808.8125 | 38.32  | 11.55 | 12.54 | 12.27 | 12.76 | 0.53 |
| 809.0754 | 54.56  | 12.36 | 12.48 | 10.46 | 11.10 | 0.78 |
| 809.0909 | 63.38  | 11.43 | 13.43 | 9.74  | 10.42 | 0.13 |
| 809.5268 | 274.88 | 20.52 | 19.99 | 20.51 | 19.59 | 0.38 |
| 810.5293 | 248.92 | 22.85 | 21.34 | 21.62 | 21.67 | 0.90 |
| 810.5660 | 243.88 | 18.53 | 18.74 | 18.31 | 17.47 | 0.07 |
| 810.7741 | 44.76  | 14.77 | 17.93 | 17.64 | 17.78 | 1.70 |
| 811.5328 | 243.89 | 21.58 | 20.05 | 20.18 | 20.59 | 0.98 |
| 811.5691 | 232.44 | 16.61 | 16.09 | 15.53 | 15.10 | 0.52 |
| 811.7750 | 46.3   | 12.73 | 12.60 | 12.78 | 12.75 | 0.04 |
| 812.5412 | 249.58 | 20.68 | 19.31 | 19.28 | 19.97 | 0.87 |
| 812.5813 | 237.28 | 17.21 | 16.93 | 16.56 | 16.13 | 0.34 |
| 812.6299 | 59.95  | 13.41 | 11.30 | 15.54 | 14.65 | 0.03 |
| 812.7101 | 47.31  | 13.94 | 15.34 | 14.74 | 14.98 | 1.32 |
| 812.7194 | 41.39  | 13.33 | 13.61 | 13.14 | 13.69 | 0.11 |
| 812.7661 | 45.23  | 12.35 | 14.13 | 13.80 | 14.29 | 1.35 |
| 812.7784 | 39.77  | 12.56 | 12.66 | 12.46 | 13.11 | 0.08 |
| 813.4724 | 214.52 | 15.39 | 16.80 | 16.80 | 15.54 | 0.88 |
| 813.4903 | 287.58 | 14.85 | 16.09 | 16.43 | 16.77 | 1.05 |
| 813.5484 | 275.78 | 19.03 | 18.27 | 18.04 | 18.32 | 0.51 |
| 813.5849 | 211.94 | 17.09 | 17.07 | 16.86 | 16.45 | 0.18 |
| 813.7093 | 48.7   | 11.99 | 12.78 | 12.82 | 13.20 | 0.79 |
| 814.4752 | 214.4  | 13.49 | 14.93 | 14.62 | 13.33 | 0.51 |
| 814.5009 | 195.24 | 10.11 | 11.97 | 13.02 | 13.05 | 0.74 |
| 814.5608 | 258.31 | 19.97 | 19.48 | 19.47 | 18.65 | 0.45 |
| 814.5946 | 197.43 | 15.27 | 14.80 | 14.87 | 14.44 | 0.47 |
| 814.7164 | 41.4   | 12.24 | 13.30 | 13.10 | 13.47 | 0.84 |
| 814.7256 | 47.43  | 13.76 | 15.51 | 15.21 | 15.26 | 1.55 |
| 815.4865 | 220.53 | 20.12 | 20.75 | 20.94 | 20.19 | 0.76 |
| 815.5637 | 248.43 | 18.03 | 16.83 | 17.00 | 16.77 | 0.75 |
| 816.4904 | 225.65 | 19.03 | 19.65 | 19.83 | 19.06 | 0.72 |
| 816.5222 | 269.8  | 13.06 | 13.87 | 13.44 | 14.67 | 0.30 |
| 816.5330 | 281.53 | 16.55 | 16.50 | 15.93 | 15.91 | 0.24 |
| 816.5765 | 255.85 | 23.04 | 22.44 | 22.25 | 21.69 | 0.75 |
| 816.7205 | 46.46  | 13.27 | 14.30 | 14.04 | 14.32 | 1.34 |
| 817.4861 | 223.04 | 14.64 | 14.57 | 15.10 | 14.23 | 0.05 |
| 817.5032 | 229.42 | 23.59 | 24.18 | 24.47 | 24.07 | 0.88 |
| 817.5799 | 256.8  | 22.27 | 21.54 | 21.24 | 20.80 | 0.92 |
| 818.5066 | 228.27 | 22.51 | 23.11 | 23.41 | 22.97 | 0.89 |
| 818.5543 | 205.88 | 17.04 | 16.36 | 16.36 | 16.22 | 0.51 |
| 818.5902 | 257.78 | 22.33 | 21.16 | 20.98 | 20.79 | 1.26 |
| 818.7572 | 47.97  | 12.32 | 14.10 | 14.27 | 14.25 | 1.29 |
| 818.8833 | 60.47  | 12.64 | 12.67 | 10.58 | 11.44 | 0.90 |
| 819.5164 | 253.17 | 23.30 | 24.53 | 25.13 | 24.42 | 0.98 |
| 819.5953 | 257.8  | 20.73 | 19.88 | 19.83 | 18.96 | 0.79 |
| 820.0195 | 20.86  | 10.93 | 12.68 | 12.17 | 12.03 | 0.90 |
| 820.5202 | 253.99 | 22.06 | 23.52 | 23.98 | 23.45 | 1.16 |
| 820.5603 | 214.85 | 16.97 | 16.65 | 16.71 | 17.62 | 0.14 |

|          |        |       |       |       |       |      |
|----------|--------|-------|-------|-------|-------|------|
| 820.5987 | 289.08 | 16.63 | 15.06 | 15.50 | 14.60 | 0.92 |
| 820.6959 | 53.7   | 15.43 | 15.33 | 15.95 | 16.01 | 0.30 |
| 820.7163 | 50.96  | 13.66 | 15.33 | 15.71 | 15.49 | 1.57 |
| 820.7573 | 40.65  | 13.13 | 13.28 | 12.86 | 13.39 | 0.00 |
| 821.2912 | 64.78  | 12.31 | 12.98 | 10.15 | 10.85 | 0.54 |
| 821.5306 | 266.45 | 22.88 | 24.09 | 24.29 | 23.99 | 0.75 |
| 822.5347 | 263.92 | 22.55 | 23.28 | 23.36 | 22.87 | 0.49 |
| 822.5677 | 229.34 | 20.90 | 18.21 | 18.88 | 18.32 | 1.79 |
| 822.6533 | 48.46  | 16.60 | 17.36 | 18.45 | 18.07 | 1.30 |
| 822.7110 | 50.53  | 12.46 | 12.79 | 12.96 | 13.11 | 0.52 |
| 823.5700 | 232.36 | 19.77 | 16.37 | 16.66 | 16.37 | 1.78 |
| 824.5815 | 244.49 | 19.13 | 17.66 | 17.27 | 17.75 | 1.10 |
| 824.6512 | 56.11  | 16.14 | 16.54 | 17.69 | 17.21 | 1.04 |
| 824.6620 | 48.32  | 13.88 | 12.55 | 13.67 | 14.29 | 0.43 |
| 824.7861 | 44.69  | 13.03 | 13.65 | 13.34 | 13.74 | 0.58 |
| 824.7955 | 40.19  | 11.88 | 12.80 | 12.58 | 12.91 | 0.72 |
| 825.0567 | 63.65  | 10.92 | 12.57 | 9.53  | 10.24 | 0.15 |
| 825.5488 | 253.6  | 19.38 | 19.16 | 18.88 | 18.44 | 0.30 |
| 825.5851 | 234.58 | 17.96 | 15.72 | 15.45 | 15.93 | 1.58 |
| 826.5364 | 276.26 | 17.63 | 13.74 | 13.05 | 13.49 | 1.86 |
| 826.5983 | 245.71 | 16.00 | 18.83 | 18.49 | 18.40 | 1.43 |
| 826.7475 | 46.48  | 14.78 | 18.35 | 18.19 | 18.18 | 1.81 |
| 827.0926 | 20.61  | 10.77 | 12.29 | 12.49 | 12.00 | 0.88 |
| 827.5057 | 288.26 | 13.95 | 14.30 | 15.14 | 14.72 | 0.31 |
| 827.5635 | 243.19 | 21.50 | 20.96 | 20.76 | 19.92 | 0.51 |
| 827.6011 | 236.33 | 14.93 | 18.16 | 17.82 | 17.25 | 1.81 |
| 827.6099 | 239.11 | 13.87 | 14.51 | 14.11 | 14.68 | 0.46 |
| 827.7472 | 46.64  | 12.62 | 12.85 | 12.79 | 13.16 | 0.31 |
| 828.4826 | 240.76 | 14.89 | 15.44 | 16.22 | 15.27 | 0.35 |
| 828.5729 | 252.26 | 21.50 | 21.09 | 21.13 | 20.95 | 0.35 |
| 828.6813 | 50.27  | 13.45 | 14.48 | 14.07 | 14.36 | 1.00 |
| 828.6909 | 43.61  | 11.78 | 12.99 | 12.53 | 13.43 | 0.72 |
| 828.7327 | 40.8   | 12.21 | 12.53 | 12.15 | 12.99 | 0.27 |
| 828.7453 | 46.59  | 13.55 | 14.85 | 14.65 | 14.94 | 1.50 |
| 829.4873 | 229.45 | 14.67 | 13.72 | 14.11 | 13.43 | 0.46 |
| 829.5792 | 248.79 | 19.56 | 19.90 | 19.40 | 19.32 | 0.05 |
| 830.4977 | 275.51 | 21.26 | 18.52 | 19.93 | 18.61 | 1.15 |
| 830.5919 | 249.96 | 21.37 | 20.80 | 20.87 | 20.94 | 0.50 |
| 830.6955 | 49.8   | 12.66 | 14.19 | 14.19 | 14.06 | 1.41 |
| 830.7052 | 42.99  | 12.83 | 13.80 | 13.51 | 13.84 | 0.77 |
| 831.5017 | 286.49 | 19.94 | 17.80 | 19.34 | 16.95 | 0.78 |
| 831.5956 | 251.06 | 20.11 | 19.55 | 19.23 | 19.41 | 0.52 |
| 832.5124 | 243    | 20.13 | 19.09 | 19.62 | 19.31 | 0.75 |
| 832.6027 | 286.96 | 16.04 | 15.78 | 15.45 | 15.90 | 0.34 |
| 832.6032 | 230.45 | 18.50 | 17.11 | 16.85 | 17.40 | 1.08 |
| 832.6977 | 48.75  | 13.43 | 13.86 | 13.70 | 14.04 | 0.66 |
| 832.7749 | 36.34  | 12.12 | 14.10 | 12.71 | 13.69 | 0.62 |
| 833.5184 | 242.4  | 21.16 | 21.64 | 21.70 | 21.33 | 0.37 |
| 833.5974 | 199.51 | 13.79 | 13.35 | 13.27 | 13.42 | 0.34 |
| 833.6106 | 204.6  | 16.67 | 15.15 | 14.90 | 15.51 | 1.28 |
| 834.5264 | 242.13 | 24.35 | 21.61 | 21.39 | 22.66 | 1.55 |
| 834.5722 | 216.31 | 16.00 | 16.13 | 15.98 | 15.74 | 0.01 |
| 834.7265 | 43.64  | 10.81 | 12.63 | 12.48 | 12.59 | 1.04 |
| 834.7362 | 50     | 12.37 | 13.33 | 13.58 | 13.68 | 0.86 |
| 834.8563 | 53.18  | 13.06 | 12.85 | 11.18 | 11.73 | 1.08 |
| 835.5315 | 248.88 | 23.66 | 21.60 | 21.36 | 22.31 | 1.17 |
| 836.5411 | 275.42 | 22.85 | 22.09 | 21.74 | 21.90 | 0.70 |
| 836.5805 | 233.8  | 16.66 | 16.00 | 15.91 | 15.42 | 0.54 |
| 836.6618 | 56.2   | 12.27 | 10.60 | 11.79 | 12.19 | 0.74 |
| 836.6846 | 46.5   | 13.10 | 12.73 | 13.47 | 13.39 | 0.00 |
| 836.6959 | 53.15  | 13.97 | 15.10 | 15.62 | 15.50 | 1.40 |
| 836.7268 | 47.55  | 11.97 | 13.54 | 13.10 | 13.53 | 1.19 |

|          |        |       |       |       |       |      |
|----------|--------|-------|-------|-------|-------|------|
| 837.2601 | 65.2   | 12.81 | 13.24 | 10.53 | 11.32 | 0.66 |
| 837.5469 | 270.74 | 21.54 | 20.81 | 20.86 | 20.97 | 0.50 |
| 837.5855 | 290.16 | 14.06 | 14.82 | 14.21 | 13.03 | 0.16 |
| 837.5864 | 214.72 | 16.32 | 16.00 | 16.22 | 15.51 | 0.22 |
| 838.5583 | 249.88 | 21.41 | 20.24 | 20.51 | 20.39 | 0.67 |
| 838.5967 | 230.79 | 17.36 | 17.43 | 17.56 | 16.74 | 0.03 |
| 838.6269 | 49.84  | 15.01 | 14.70 | 17.10 | 16.68 | 0.55 |
| 839.4866 | 218.65 | 20.31 | 20.96 | 21.31 | 20.62 | 0.84 |
| 839.5633 | 253.45 | 20.55 | 19.43 | 19.56 | 19.21 | 0.73 |
| 839.6000 | 214.63 | 16.53 | 16.03 | 16.02 | 15.34 | 0.45 |
| 840.4901 | 218.93 | 19.32 | 19.95 | 20.30 | 19.55 | 0.76 |
| 840.5238 | 284.27 | 12.76 | 14.33 | 14.02 | 13.75 | 0.66 |
| 840.5330 | 293.15 | 14.35 | 15.37 | 15.07 | 14.78 | 0.58 |
| 840.5759 | 256.84 | 22.59 | 22.19 | 21.92 | 21.28 | 0.53 |
| 840.6089 | 197.79 | 13.89 | 13.37 | 13.43 | 13.14 | 0.36 |
| 840.6240 | 58.04  | 12.73 | 12.59 | 15.36 | 14.13 | 0.43 |
| 840.7528 | 40.89  | 12.13 | 12.35 | 12.13 | 12.53 | 0.18 |
| 840.7626 | 46.48  | 13.52 | 14.04 | 13.74 | 14.22 | 0.55 |
| 841.4862 | 223.58 | 14.57 | 14.96 | 16.10 | 14.20 | 0.45 |
| 841.5010 | 225.2  | 22.10 | 22.78 | 22.96 | 22.36 | 0.81 |
| 841.5794 | 258.16 | 21.60 | 21.44 | 21.01 | 20.64 | 0.43 |
| 842.5075 | 221.46 | 21.09 | 21.79 | 21.95 | 21.35 | 0.81 |
| 842.5543 | 201.68 | 16.34 | 16.86 | 16.40 | 16.08 | 0.19 |
| 842.5889 | 259.72 | 20.81 | 20.73 | 20.43 | 19.65 | 0.26 |
| 842.7209 | 47.95  | 15.20 | 17.82 | 17.75 | 17.63 | 1.88 |
| 843.5269 | 233.86 | 21.87 | 22.04 | 22.01 | 21.62 | 0.16 |
| 843.5947 | 252.81 | 18.42 | 18.12 | 17.57 | 17.46 | 0.35 |
| 843.7182 | 47.99  | 11.00 | 12.36 | 12.39 | 12.35 | 1.04 |
| 844.5289 | 228.97 | 20.83 | 20.87 | 20.72 | 20.42 | 0.11 |
| 844.5683 | 201.24 | 15.37 | 15.74 | 15.76 | 15.42 | 0.31 |
| 844.6069 | 255.65 | 20.19 | 19.69 | 19.45 | 18.98 | 0.52 |
| 844.6580 | 55.11  | 14.19 | 14.34 | 14.76 | 14.80 | 0.43 |
| 844.6663 | 47.66  | 12.35 | 11.83 | 12.65 | 12.71 | 0.07 |
| 844.7059 | 41.72  | 10.89 | 12.43 | 12.14 | 12.66 | 1.17 |
| 844.7190 | 48.14  | 13.72 | 15.08 | 14.95 | 15.08 | 1.70 |
| 845.5307 | 232.49 | 20.22 | 20.50 | 20.34 | 19.52 | 0.10 |
| 845.5667 | 287.79 | 12.47 | 12.71 | 12.84 | 11.98 | 0.07 |
| 845.5718 | 197.3  | 13.99 | 13.91 | 13.98 | 13.13 | 0.11 |
| 845.6105 | 248.85 | 18.56 | 17.32 | 17.11 | 16.91 | 0.83 |
| 846.5420 | 234.96 | 18.91 | 18.87 | 18.79 | 17.99 | 0.18 |
| 846.5638 | 229.72 | 11.47 | 15.06 | 16.01 | 14.89 | 1.51 |
| 846.5799 | 221.07 | 16.24 | 17.10 | 17.81 | 17.33 | 0.99 |
| 846.6178 | 291.16 | 15.92 | 14.89 | 14.65 | 14.85 | 0.69 |
| 846.6729 | 53.92  | 13.28 | 15.27 | 15.45 | 15.22 | 1.40 |
| 846.6827 | 46.55  | 10.58 | 12.98 | 13.13 | 12.40 | 1.05 |
| 847.5497 | 250.37 | 18.92 | 18.74 | 18.77 | 17.73 | 0.25 |
| 847.5680 | 225.44 | 13.66 | 14.08 | 15.64 | 14.83 | 0.78 |
| 847.5879 | 206.02 | 14.59 | 16.17 | 15.89 | 15.98 | 1.08 |
| 848.4779 | 193.15 | 13.14 | 12.23 | 12.09 | 12.36 | 0.74 |
| 848.4943 | 191.82 | 11.76 | 12.36 | 12.06 | 11.92 | 0.27 |
| 848.5456 | 269.81 | 17.01 | 16.51 | 16.78 | 16.79 | 0.34 |
| 848.5901 | 214.97 | 17.77 | 16.17 | 15.86 | 15.54 | 1.32 |
| 848.6717 | 53.52  | 12.13 | 13.53 | 13.75 | 13.76 | 1.28 |
| 848.7364 | 44.24  | 10.96 | 12.39 | 12.00 | 12.55 | 0.91 |
| 848.7530 | 38.17  | 12.38 | 13.57 | 13.13 | 13.54 | 0.85 |
| 849.4836 | 194.54 | 12.84 | 11.44 | 12.37 | 12.12 | 0.62 |
| 849.5441 | 206.98 | 16.78 | 15.25 | 15.71 | 15.64 | 0.89 |
| 849.5741 | 244.76 | 14.68 | 15.01 | 14.92 | 14.47 | 0.11 |
| 849.5864 | 235.85 | 14.84 | 14.47 | 14.84 | 14.40 | 0.18 |
| 850.5599 | 241.41 | 21.79 | 21.11 | 21.20 | 19.94 | 0.54 |
| 850.5984 | 236.26 | 15.61 | 17.26 | 17.22 | 17.36 | 1.12 |
| 850.6079 | 228.52 | 13.97 | 14.15 | 13.88 | 14.33 | 0.06 |

|          |        |       |       |       |       |      |
|----------|--------|-------|-------|-------|-------|------|
| 850.7110 | 53.27  | 11.77 | 12.44 | 12.61 | 12.84 | 0.61 |
| 850.7142 | 53.31  | 11.89 | 12.59 | 12.54 | 12.56 | 0.51 |
| 850.8346 | 62.01  | 11.81 | 12.50 | 9.98  | 10.62 | 0.47 |
| 851.5637 | 251.8  | 20.94 | 21.06 | 21.53 | 20.33 | 0.13 |
| 852.4821 | 220.95 | 12.25 | 13.35 | 13.92 | 13.72 | 0.45 |
| 852.5389 | 278.96 | 15.06 | 15.55 | 15.65 | 14.79 | 0.24 |
| 852.5631 | 256.6  | 22.27 | 20.59 | 20.63 | 20.37 | 1.59 |
| 852.6109 | 253.58 | 15.14 | 16.01 | 15.72 | 14.53 | 0.46 |
| 853.4914 | 218.89 | 13.35 | 13.50 | 14.22 | 14.09 | 0.28 |
| 853.5486 | 279.61 | 17.84 | 15.72 | 16.17 | 15.53 | 1.33 |
| 853.5717 | 255.03 | 21.14 | 19.62 | 19.90 | 19.22 | 1.29 |
| 853.6155 | 237.35 | 12.16 | 12.25 | 13.64 | 10.95 | 0.14 |
| 854.4981 | 252.51 | 20.49 | 20.37 | 19.52 | 19.05 | 0.40 |
| 854.5599 | 281.68 | 17.15 | 12.66 | 12.67 | 12.69 | 1.77 |
| 854.5916 | 248.27 | 21.69 | 21.06 | 21.13 | 20.69 | 0.61 |
| 855.5023 | 242.68 | 20.56 | 21.13 | 20.68 | 19.71 | 0.21 |
| 855.5952 | 252.08 | 20.18 | 20.17 | 19.90 | 19.29 | 0.18 |
| 855.6600 | 202.03 | 16.79 | 14.88 | 14.77 | 16.19 | 1.01 |
| 856.5072 | 234.43 | 19.49 | 19.90 | 20.08 | 18.83 | 0.36 |
| 856.6026 | 236.43 | 17.76 | 16.62 | 16.55 | 16.98 | 0.80 |
| 856.6637 | 199.51 | 15.17 | 12.97 | 12.94 | 14.34 | 1.16 |
| 856.7334 | 47.7   | 13.19 | 13.95 | 13.74 | 14.00 | 0.80 |
| 857.5176 | 249.57 | 22.94 | 24.21 | 23.91 | 24.02 | 1.13 |
| 857.6116 | 203.83 | 16.29 | 15.56 | 15.65 | 15.65 | 0.44 |
| 858.5229 | 247.93 | 22.04 | 23.00 | 22.80 | 22.94 | 0.97 |
| 858.6898 | 49.93  | 15.02 | 17.98 | 18.14 | 17.80 | 1.64 |
| 859.5278 | 255.03 | 22.25 | 21.50 | 21.63 | 21.44 | 0.75 |
| 860.4982 | 200.08 | 11.88 | 14.12 | 14.73 | 13.21 | 1.07 |
| 860.5302 | 245.82 | 20.87 | 19.09 | 19.83 | 19.37 | 1.04 |
| 860.6288 | 58.39  | 13.37 | 13.17 | 14.69 | 13.79 | 0.38 |
| 860.6780 | 52.06  | 9.36  | 12.18 | 12.12 | 12.12 | 1.30 |
| 860.6812 | 43.76  | 10.21 | 12.40 | 12.55 | 12.48 | 1.20 |
| 860.6962 | 49.71  | 13.35 | 16.41 | 16.54 | 16.16 | 1.39 |
| 861.5470 | 284.63 | 22.63 | 20.07 | 21.12 | 20.49 | 1.18 |
| 862.5559 | 290.16 | 21.03 | 19.28 | 19.95 | 19.23 | 0.84 |
| 863.5574 | 291.57 | 19.05 | 16.05 | 17.19 | 16.58 | 1.21 |
| 864.5332 | 185.26 | 13.03 | 14.32 | 15.58 | 13.73 | 1.34 |
| 864.5760 | 256.8  | 21.30 | 20.98 | 21.02 | 20.45 | 0.29 |
| 864.6117 | 198.89 | 12.93 | 13.60 | 12.89 | 12.10 | 0.11 |
| 864.7143 | 39.93  | 11.85 | 13.01 | 12.69 | 13.07 | 1.03 |
| 864.7245 | 45.25  | 13.40 | 14.39 | 13.72 | 14.22 | 0.93 |
| 865.4888 | 227.97 | 18.07 | 17.81 | 18.71 | 18.18 | 0.12 |
| 865.5022 | 223.72 | 23.05 | 23.55 | 24.12 | 23.80 | 0.80 |
| 865.5794 | 258.32 | 20.15 | 20.39 | 20.39 | 19.69 | 0.12 |
| 866.4915 | 228.81 | 15.99 | 16.95 | 17.52 | 16.01 | 0.71 |
| 866.5056 | 223.69 | 22.12 | 22.59 | 23.14 | 22.84 | 0.79 |
| 866.5557 | 196.61 | 14.85 | 15.27 | 15.93 | 14.77 | 0.45 |
| 866.5898 | 259.32 | 20.30 | 20.46 | 20.28 | 19.38 | 0.03 |
| 867.4987 | 228.4  | 15.97 | 14.63 | 16.26 | 16.26 | 0.29 |
| 867.5242 | 237.96 | 22.28 | 22.69 | 22.90 | 22.45 | 0.62 |
| 867.5949 | 250.34 | 18.22 | 18.58 | 18.36 | 17.19 | 0.07 |
| 868.5257 | 229.03 | 21.07 | 21.58 | 21.70 | 21.11 | 0.63 |
| 868.5708 | 194.2  | 14.34 | 15.12 | 15.30 | 14.37 | 0.53 |
| 868.6070 | 257.07 | 20.69 | 20.24 | 20.04 | 19.21 | 0.55 |
| 869.5368 | 240.45 | 21.87 | 21.42 | 21.42 | 21.22 | 0.75 |
| 869.6107 | 256.28 | 18.71 | 18.41 | 18.11 | 16.80 | 0.37 |
| 870.5174 | 232.73 | 11.14 | 12.00 | 11.95 | 12.09 | 0.44 |
| 870.5421 | 237.14 | 20.85 | 20.23 | 20.06 | 19.97 | 1.01 |
| 870.5690 | 274.1  | 16.85 | 16.54 | 15.05 | 16.18 | 0.63 |
| 870.5857 | 209.76 | 15.77 | 16.30 | 16.11 | 15.19 | 0.24 |
| 870.6194 | 292.92 | 16.56 | 15.04 | 14.75 | 15.06 | 1.34 |
| 870.6315 | 213.41 | 14.12 | 12.40 | 12.27 | 12.91 | 0.69 |

|          |        |       |       |       |       |      |
|----------|--------|-------|-------|-------|-------|------|
| 871.5471 | 240.65 | 20.20 | 18.62 | 18.09 | 19.42 | 1.39 |
| 871.5888 | 197.75 | 13.80 | 15.06 | 15.08 | 14.64 | 0.75 |
| 872.4870 | 194.72 | 13.44 | 14.34 | 14.21 | 14.11 | 0.74 |
| 872.5450 | 266.26 | 18.03 | 16.39 | 15.67 | 17.48 | 1.13 |
| 872.7068 | 50.03  | 12.18 | 12.93 | 13.03 | 12.85 | 0.44 |
| 872.7310 | 47.42  | 11.85 | 13.08 | 13.02 | 12.97 | 0.88 |
| 873.5680 | 202.45 | 15.45 | 13.65 | 13.37 | 13.83 | 1.36 |
| 874.5157 | 209.95 | 12.91 | 12.54 | 12.81 | 12.07 | 0.21 |
| 874.5594 | 226.1  | 16.50 | 16.79 | 16.94 | 16.45 | 0.17 |
| 874.5717 | 210.21 | 15.24 | 16.03 | 16.22 | 15.39 | 0.48 |
| 874.6649 | 45.66  | 13.60 | 14.91 | 15.36 | 15.14 | 1.37 |
| 874.6788 | 50.95  | 12.93 | 13.56 | 14.15 | 14.26 | 0.82 |
| 875.5635 | 206.47 | 15.82 | 15.70 | 16.23 | 15.35 | 0.02 |
| 876.5757 | 230.45 | 17.03 | 17.33 | 17.57 | 16.73 | 0.20 |
| 876.6052 | 51.49  | 12.03 | 10.50 | 12.29 | 12.53 | 0.47 |
| 876.6680 | 53.01  | 13.17 | 13.65 | 14.11 | 14.13 | 0.86 |
| 876.6749 | 46.47  | 12.46 | 12.58 | 12.49 | 12.78 | 0.12 |
| 877.4594 | 251.97 | 11.76 | 12.40 | 12.79 | 11.91 | 0.59 |
| 877.5784 | 209.08 | 16.48 | 16.29 | 16.47 | 15.80 | 0.15 |
| 877.5917 | 198.96 | 14.79 | 15.02 | 14.95 | 14.75 | 0.14 |
| 878.5913 | 240.35 | 18.86 | 18.04 | 17.77 | 17.24 | 0.75 |
| 878.7548 | 39.28  | 11.92 | 12.85 | 12.58 | 13.00 | 0.71 |
| 879.5026 | 221.64 | 16.82 | 17.79 | 17.86 | 17.16 | 0.98 |
| 879.5948 | 235.84 | 16.93 | 16.05 | 15.88 | 15.84 | 0.77 |
| 880.4952 | 220.49 | 12.46 | 11.81 | 11.77 | 11.78 | 0.55 |
| 880.5086 | 229.91 | 16.02 | 16.80 | 16.99 | 16.91 | 0.81 |
| 880.6058 | 214.06 | 17.35 | 16.80 | 16.79 | 16.44 | 0.60 |
| 880.6984 | 46.88  | 13.02 | 14.21 | 13.59 | 14.19 | 1.24 |
| 880.7053 | 40.91  | 12.79 | 12.91 | 12.62 | 13.17 | 0.05 |
| 881.5188 | 244.71 | 22.29 | 23.51 | 23.38 | 23.74 | 1.25 |
| 881.6074 | 200.69 | 14.61 | 15.15 | 14.63 | 12.76 | 0.03 |
| 882.5229 | 244.91 | 21.61 | 22.57 | 22.46 | 22.68 | 1.01 |
| 883.5323 | 250.55 | 21.64 | 24.05 | 23.87 | 23.91 | 1.29 |
| 884.5368 | 251.37 | 22.04 | 22.98 | 22.79 | 22.90 | 0.86 |
| 885.5449 | 276.16 | 27.90 | 27.70 | 25.03 | 26.97 | 0.65 |
| 886.5500 | 272.86 | 26.83 | 26.45 | 25.23 | 25.89 | 0.63 |
| 887.5546 | 282.57 | 25.07 | 24.53 | 23.10 | 24.06 | 0.88 |
| 888.5607 | 272.59 | 22.68 | 21.84 | 21.00 | 21.47 | 0.98 |
| 888.6934 | 49.68  | 11.16 | 11.52 | 11.97 | 11.76 | 0.39 |
| 888.7039 | 42.4   | 12.15 | 12.80 | 12.72 | 12.67 | 0.70 |
| 889.5633 | 275.93 | 19.68 | 19.10 | 19.09 | 18.47 | 0.49 |
| 890.5845 | 228.11 | 14.42 | 13.96 | 13.88 | 13.61 | 0.38 |
| 890.5916 | 288.58 | 15.73 | 15.44 | 15.27 | 14.74 | 0.30 |
| 890.5952 | 218.43 | 14.70 | 14.42 | 14.42 | 14.48 | 0.19 |
| 890.6381 | 47.95  | 14.06 | 15.73 | 16.60 | 15.99 | 1.53 |
| 890.6486 | 54.95  | 10.85 | 12.96 | 14.19 | 13.76 | 1.25 |
| 891.5983 | 222.07 | 14.30 | 14.26 | 14.11 | 13.27 | 0.11 |
| 892.5925 | 224.79 | 13.28 | 13.37 | 13.42 | 12.40 | 0.00 |
| 892.6062 | 292.33 | 16.82 | 16.06 | 15.79 | 15.31 | 0.65 |
| 892.6406 | 55.38  | 12.46 | 13.17 | 14.28 | 14.48 | 0.60 |
| 893.6080 | 221.2  | 14.39 | 14.22 | 14.21 | 13.56 | 0.16 |
| 893.6114 | 290.68 | 15.78 | 15.10 | 14.97 | 14.63 | 0.74 |
| 893.6205 | 217.2  | 14.17 | 13.83 | 13.41 | 12.83 | 0.42 |
| 894.5489 | 196.29 | 17.25 | 16.35 | 16.34 | 16.21 | 0.92 |
| 894.5784 | 197.56 | 13.74 | 13.79 | 14.01 | 13.35 | 0.08 |
| 894.5873 | 200.89 | 14.52 | 15.29 | 15.32 | 14.57 | 0.71 |
| 894.5964 | 198.13 | 13.05 | 13.19 | 12.61 | 12.69 | 0.13 |
| 894.6247 | 216.14 | 14.95 | 13.95 | 13.79 | 14.33 | 0.96 |
| 894.7329 | 45.84  | 12.91 | 14.15 | 13.79 | 14.13 | 1.23 |
| 894.7434 | 40.47  | 11.96 | 12.91 | 12.55 | 13.04 | 0.87 |
| 895.5380 | 191.68 | 11.95 | 11.52 | 11.62 | 11.52 | 0.24 |
| 895.5595 | 195.61 | 13.58 | 13.06 | 12.90 | 12.80 | 0.37 |

|          |        |       |       |       |       |      |
|----------|--------|-------|-------|-------|-------|------|
| 895.5673 | 278.74 | 16.50 | 16.34 | 16.02 | 15.68 | 0.33 |
| 895.5847 | 197.82 | 12.78 | 13.49 | 13.20 | 13.03 | 0.25 |
| 896.5518 | 191.24 | 12.53 | 12.41 | 12.49 | 12.61 | 0.06 |
| 896.5659 | 194.63 | 13.50 | 14.08 | 13.50 | 13.22 | 0.11 |
| 896.5927 | 195.89 | 10.77 | 12.38 | 12.84 | 12.03 | 1.11 |
| 896.6684 | 43.12  | 12.49 | 12.98 | 12.88 | 12.95 | 0.67 |
| 896.6792 | 48.08  | 12.09 | 13.05 | 12.71 | 13.04 | 0.80 |
| 897.5543 | 262.04 | 15.75 | 16.22 | 15.49 | 16.07 | 0.09 |
| 898.5488 | 209.08 | 11.13 | 12.63 | 13.10 | 12.09 | 0.58 |
| 898.5577 | 215.43 | 15.08 | 15.10 | 14.98 | 14.84 | 0.04 |
| 898.5769 | 194.85 | 14.64 | 13.80 | 12.45 | 14.05 | 0.51 |
| 899.5292 | 218.23 | 8.34  | 13.09 | 12.88 | 10.76 | 1.31 |
| 899.5633 | 295.47 | 14.98 | 11.31 | 13.40 | 11.78 | 0.80 |
| 899.5711 | 208.25 | 12.91 | 12.54 | 13.37 | 12.52 | 0.02 |
| 900.5366 | 216.1  | 12.90 | 14.32 | 13.61 | 14.43 | 0.81 |
| 901.5444 | 224.03 | 13.65 | 14.87 | 15.03 | 13.63 | 0.47 |
| 902.5501 | 226.23 | 13.35 | 14.56 | 14.29 | 13.17 | 0.37 |
| 903.5033 | 216.62 | 12.79 | 12.29 | 12.12 | 11.97 | 0.49 |
| 903.5105 | 221.76 | 12.47 | 12.13 | 12.31 | 12.17 | 0.18 |
| 904.6778 | 51.96  | 11.73 | 12.43 | 12.33 | 12.64 | 0.60 |
| 905.5067 | 227.42 | 13.89 | 12.80 | 12.99 | 12.86 | 1.04 |
| 905.5256 | 224.45 | 15.94 | 16.08 | 16.15 | 15.72 | 0.16 |
| 906.5104 | 228.6  | 12.35 | 12.10 | 11.71 | 11.96 | 0.37 |
| 906.5213 | 224.15 | 14.60 | 13.69 | 13.76 | 13.40 | 1.03 |
| 906.6055 | 49.28  | 11.55 | 11.47 | 11.86 | 11.98 | 0.14 |
| 906.6147 | 57.08  | 12.83 | 12.86 | 14.30 | 14.12 | 0.58 |
| 907.5342 | 243.64 | 18.85 | 18.77 | 18.82 | 17.97 | 0.15 |
| 908.5393 | 242.61 | 15.71 | 15.26 | 15.04 | 15.62 | 0.65 |
| 908.5504 | 236.29 | 15.13 | 14.49 | 14.66 | 15.03 | 0.68 |
| 909.5487 | 266.68 | 23.19 | 21.13 | 21.90 | 22.85 | 0.90 |
| 910.5526 | 272.28 | 22.21 | 20.60 | 21.16 | 22.18 | 1.07 |
| 910.7042 | 47.11  | 12.93 | 14.19 | 13.92 | 14.14 | 1.26 |
| 910.7152 | 40.65  | 12.98 | 12.88 | 12.72 | 13.28 | 0.14 |
| 911.5627 | 278.58 | 23.43 | 22.46 | 21.92 | 22.15 | 0.93 |
| 912.5676 | 280.74 | 22.42 | 21.49 | 21.09 | 21.04 | 1.01 |
| 912.7028 | 47.22  | 10.98 | 12.48 | 11.92 | 11.97 | 0.83 |
| 913.5729 | 287.03 | 19.99 | 19.62 | 19.52 | 18.56 | 0.39 |
| 914.5781 | 286.42 | 15.40 | 15.82 | 15.80 | 15.33 | 0.22 |
| 915.5290 | 232.78 | 9.36  | 12.02 | 12.48 | 9.65  | 0.89 |
| 918.5389 | 198.19 | 13.78 | 13.07 | 13.80 | 13.38 | 0.29 |
| 918.5554 | 194.61 | 14.50 | 13.79 | 14.11 | 14.14 | 0.59 |
| 919.5501 | 193.25 | 13.89 | 13.04 | 13.33 | 13.51 | 0.66 |
| 920.5613 | 191.86 | 13.70 | 12.84 | 12.85 | 12.86 | 0.86 |
| 922.5734 | 194.91 | 13.75 | 13.23 | 12.99 | 13.06 | 0.74 |
| 923.5071 | 189.06 | 13.51 | 12.07 | 12.19 | 11.41 | 0.99 |
| 926.6715 | 42.17  | 10.00 | 12.43 | 12.25 | 12.27 | 1.36 |
| 926.6828 | 48.3   | 10.68 | 13.72 | 13.68 | 13.81 | 1.49 |
| 928.6811 | 48.71  | 10.32 | 12.77 | 12.48 | 12.81 | 1.30 |
| 929.5173 | 221.44 | 11.27 | 11.61 | 12.72 | 11.42 | 0.44 |
| 931.5249 | 211.44 | 10.42 | 12.54 | 12.60 | 9.56  | 0.85 |
| 931.6163 | 220.36 | 14.41 | 10.57 | 10.25 | 10.88 | 2.32 |
| 932.7126 | 46.45  | 10.59 | 12.55 | 11.90 | 12.61 | 1.04 |
| 933.4815 | 227.04 | 9.81  | 10.65 | 11.15 | 11.54 | 0.64 |
| 933.4929 | 222.78 | 10.69 | 11.36 | 11.84 | 12.60 | 0.63 |
| 934.5273 | 194.05 | 11.32 | 12.78 | 12.54 | 11.82 | 0.63 |
| 942.6580 | 51.19  | 11.26 | 12.76 | 12.53 | 12.90 | 1.10 |
| 967.5563 | 171.69 | 11.06 | 9.69  | 10.31 | 9.85  | 0.60 |
| 971.6100 | 209.2  | 14.45 | 15.70 | 15.34 | 14.75 | 0.51 |
| 972.6136 | 210.67 | 12.76 | 12.19 | 11.81 | 11.66 | 0.37 |
| 975.6446 | 209.5  | 11.39 | 12.19 | 10.33 | 12.47 | 0.07 |
| 984.7670 | 223.56 | 14.17 | 13.47 | 13.20 | 12.72 | 0.47 |
| 986.7691 | 263.94 | 14.70 | 13.81 | 13.80 | 13.73 | 0.77 |

|           |        |       |       |       |       |      |
|-----------|--------|-------|-------|-------|-------|------|
| 986.7774  | 258.05 | 15.68 | 15.16 | 14.82 | 14.80 | 0.57 |
| 987.7849  | 258.54 | 15.37 | 14.60 | 14.19 | 14.07 | 0.70 |
| 995.6141  | 210.28 | 11.81 | 12.29 | 11.92 | 11.69 | 0.19 |
| 1010.7771 | 238.38 | 15.08 | 14.41 | 14.86 | 14.51 | 0.39 |
| 1012.7963 | 265.53 | 17.33 | 17.73 | 17.54 | 17.17 | 0.31 |
| 1012.8070 | 270.79 | 15.94 | 15.01 | 14.87 | 15.09 | 0.66 |
| 1013.7985 | 264.8  | 16.44 | 15.96 | 15.84 | 15.89 | 0.53 |
| 1014.8042 | 290.58 | 15.06 | 14.45 | 14.19 | 13.70 | 0.34 |
| 1035.6630 | 229.26 | 16.04 | 11.04 | 10.70 | 11.67 | 2.27 |
| 1036.6612 | 224.52 | 15.06 | 10.14 | 9.93  | 10.61 | 2.29 |
| 1036.7915 | 256.72 | 15.63 | 15.11 | 15.58 | 15.31 | 0.27 |
| 1038.8104 | 267.61 | 16.39 | 16.36 | 16.36 | 16.07 | 0.06 |
| 1040.8263 | 295.04 | 13.11 | 15.27 | 15.87 | 14.21 | 0.83 |
| 1062.8086 | 267.11 | 15.38 | 15.66 | 16.17 | 15.76 | 0.30 |
| 1082.1994 | 21.14  | 12.93 | 11.67 | 11.52 | 10.80 | 0.78 |
