# Supplementary material
Source: PubMed Central journal article supplement (PMC9062885)
Supplement: NIHMS1790332-supplement-Table_S4.pdf [file NIHMS1790332-supplement-Table_S4.pdf]

Supplemental Table 4

Nellis et al, Lung metabolome of 1,3-butadiene exposed Collaborative  
Cross mice reflects metabolic phenotype of human lung cancer

High resolution metabolomics analysis of lung from collaborative-cross mice  
exposed to butadiene

PLS-DA results\*, HILIC/ESI+ data

\*values reported for data that was log<sub>2</sub>- transformed and quantile-normalized

| mz      | time   | mean - Ctrl | mean - 2ppm | mean - 20ppm | mean- 200ppm | VIP  |
|---------|--------|-------------|-------------|--------------|--------------|------|
| 85.0107 | 41.64  | 13.98       | 12.87       | 12.60        | 13.72        | 0.64 |
| 85.0284 | 53.77  | 20.97       | 22.38       | 21.93        | 21.34        | 1.31 |
| 85.0415 | 65.97  | 16.21       | 15.44       | 15.60        | 15.48        | 1.13 |
| 85.0478 | 66.15  | 20.21       | 20.61       | 20.75        | 20.30        | 0.81 |
| 85.0520 | 69.34  | 14.76       | 13.43       | 13.90        | 13.46        | 0.97 |
| 85.0649 | 72.56  | 15.37       | 13.73       | 13.92        | 13.70        | 0.95 |
| 85.0779 | 77.13  | 19.31       | 20.98       | 20.96        | 20.30        | 1.28 |
| 85.0842 | 74.9   | 14.53       | 13.65       | 13.79        | 14.13        | 0.69 |
| 85.0886 | 291.65 | 15.20       | 16.45       | 14.72        | 15.74        | 0.26 |
| 85.1012 | 277.13 | 15.95       | 13.04       | 13.04        | 13.72        | 1.07 |
| 86.0064 | 19.67  | 16.66       | 7.33        | 7.78         | 8.90         | 2.03 |
| 86.0141 | 41.62  | 13.60       | 12.88       | 12.70        | 13.15        | 0.49 |
| 86.0318 | 38.49  | 16.54       | 15.34       | 15.19        | 15.20        | 0.93 |
| 86.0487 | 64.86  | 15.11       | 13.94       | 14.10        | 14.25        | 1.04 |
| 86.0601 | 281.3  | 17.50       | 15.26       | 15.20        | 15.79        | 1.58 |
| 86.0812 | 74.81  | 14.65       | 14.60       | 14.55        | 14.59        | 0.08 |
| 86.0965 | 52.93  | 24.94       | 24.01       | 24.10        | 24.00        | 1.46 |
| 86.5177 | 47.33  | 16.88       | 14.32       | 16.73        | 16.08        | 0.88 |
| 86.6873 | 56.03  | 15.33       | 13.17       | 12.91        | 13.85        | 1.53 |
| 87.0040 | 285.31 | 20.28       | 16.68       | 16.45        | 17.61        | 1.61 |
| 87.0263 | 45.17  | 16.81       | 13.80       | 14.54        | 14.59        | 1.64 |
| 87.0441 | 170.4  | 16.53       | 14.65       | 15.16        | 15.26        | 1.39 |
| 87.0553 | 74.38  | 19.98       | 19.33       | 19.70        | 19.46        | 0.87 |
| 87.0789 | 56.3   | 15.78       | 13.81       | 14.04        | 14.48        | 1.22 |
| 87.0917 | 188.29 | 15.75       | 13.33       | 13.44        | 14.18        | 1.36 |
| 87.0935 | 40.37  | 16.45       | 13.51       | 13.95        | 14.38        | 1.84 |
| 87.0998 | 47.52  | 20.77       | 19.69       | 19.87        | 19.63        | 1.45 |
| 87.5095 | 269.79 | 16.80       | 15.67       | 13.62        | 15.77        | 1.02 |
| 87.9933 | 54.33  | 15.87       | 14.09       | 13.49        | 13.91        | 0.93 |
| 88.0042 | 276.23 | 19.02       | 16.57       | 15.74        | 17.87        | 1.14 |
| 88.0216 | 182.16 | 15.84       | 13.25       | 14.05        | 14.23        | 1.28 |
| 88.0231 | 23.87  | 15.86       | 16.99       | 16.17        | 17.04        | 0.74 |
| 88.0232 | 142.35 | 17.20       | 15.41       | 15.27        | 15.80        | 1.43 |
| 88.0394 | 78.85  | 22.95       | 22.78       | 23.24        | 22.62        | 0.03 |
| 88.0579 | 70.36  | 19.73       | 20.11       | 20.23        | 19.55        | 0.34 |
| 88.0757 | 280.71 | 18.24       | 16.82       | 16.85        | 16.97        | 1.23 |
| 88.5032 | 40.96  | 18.82       | 13.12       | 16.47        | 13.75        | 1.33 |
| 88.5091 | 276.88 | 20.48       | 15.52       | 15.24        | 17.08        | 1.83 |
| 88.5152 | 37.2   | 15.03       | 11.76       | 15.22        | 14.21        | 0.58 |
| 88.5208 | 264.01 | 18.05       | 15.22       | 15.48        | 15.69        | 1.61 |
| 88.9526 | 278.43 | 18.55       | 14.91       | 15.19        | 15.77        | 1.67 |
| 88.9526 | 26.21  | 18.05       | 18.14       | 18.19        | 18.09        | 0.14 |
| 89.0020 | 264.82 | 19.47       | 14.84       | 14.87        | 16.69        | 1.86 |
| 89.0083 | 139.73 | 19.28       | 16.02       | 15.27        | 17.89        | 1.57 |
| 89.0249 | 49.45  | 16.30       | 15.66       | 15.44        | 15.72        | 0.55 |
| 89.0364 | 69.68  | 14.50       | 12.14       | 12.79        | 12.56        | 1.09 |
| 89.0386 | 38.61  | 16.76       | 14.58       | 14.82        | 14.95        | 1.32 |
| 89.0419 | 278.15 | 16.36       | 14.38       | 14.65        | 14.72        | 0.94 |
| 89.0598 | 183.91 | 16.41       | 13.96       | 14.44        | 14.87        | 1.60 |
| 89.5068 | 268.2  | 24.92       | 21.50       | 20.71        | 22.58        | 1.51 |
| 89.9398 | 22.23  | 16.32       | 7.05        | 7.26         | 8.10         | 2.09 |
| 90.0053 | 19.61  | 19.34       | 8.62        | 8.96         | 12.44        | 1.83 |
| 90.0082 | 277.49 | 20.27       | 15.99       | 15.49        | 17.56        | 1.62 |

|         |        |       |       |       |       |      |
|---------|--------|-------|-------|-------|-------|------|
| 90.0372 | 190.05 | 15.96 | 13.99 | 14.29 | 14.53 | 1.54 |
| 90.0436 | 69.94  | 15.17 | 13.06 | 13.59 | 13.56 | 1.08 |
| 90.0550 | 68.19  | 23.94 | 23.55 | 23.87 | 23.60 | 0.62 |
| 90.0626 | 70.62  | 14.78 | 14.10 | 14.01 | 13.81 | 0.46 |
| 90.0914 | 293.5  | 16.30 | 14.97 | 15.27 | 14.98 | 1.10 |
| 90.0914 | 186.19 | 17.14 | 15.57 | 16.13 | 16.08 | 1.06 |
| 90.5070 | 268.51 | 21.99 | 20.26 | 19.69 | 20.25 | 0.70 |
| 90.5258 | 266.01 | 25.42 | 24.40 | 24.38 | 24.55 | 0.58 |
| 90.9038 | 56.22  | 16.48 | 13.47 | 14.31 | 14.75 | 1.42 |
| 90.9477 | 287.66 | 18.08 | 15.75 | 15.30 | 16.59 | 0.81 |
| 90.9767 | 46.18  | 19.97 | 19.51 | 19.56 | 19.79 | 0.51 |
| 91.0011 | 271.57 | 16.80 | 14.32 | 14.54 | 14.95 | 1.18 |
| 91.0059 | 133.93 | 19.63 | 15.32 | 15.89 | 16.27 | 1.73 |
| 91.0059 | 35.04  | 20.87 | 20.66 | 21.33 | 20.64 | 0.03 |
| 91.0086 | 143.96 | 17.94 | 14.41 | 13.79 | 16.64 | 1.37 |
| 91.0179 | 45.37  | 16.55 | 14.19 | 16.60 | 16.30 | 0.68 |
| 91.0236 | 272.18 | 20.44 | 18.26 | 18.02 | 18.08 | 1.24 |
| 91.0275 | 269.2  | 21.56 | 19.87 | 19.64 | 20.24 | 0.94 |
| 91.0390 | 125.99 | 14.01 | 15.20 | 15.22 | 14.94 | 1.15 |
| 91.0398 | 45.15  | 16.50 | 12.12 | 13.14 | 12.76 | 1.39 |
| 91.0520 | 56.83  | 15.82 | 12.98 | 13.66 | 13.61 | 1.64 |
| 91.0542 | 289.37 | 19.75 | 17.63 | 17.55 | 17.73 | 0.98 |
| 91.0582 | 143.87 | 14.74 | 13.66 | 13.80 | 13.83 | 0.56 |
| 91.4934 | 96     | 18.58 | 18.65 | 18.32 | 18.20 | 0.08 |
| 91.5046 | 268.45 | 20.69 | 18.62 | 17.49 | 19.39 | 0.87 |
| 91.5075 | 35.98  | 17.01 | 15.23 | 16.80 | 15.17 | 0.55 |
| 91.5239 | 253.96 | 18.27 | 15.41 | 15.54 | 16.02 | 1.65 |
| 91.5424 | 89.14  | 16.41 | 17.15 | 17.55 | 17.13 | 0.70 |
| 91.9623 | 192.16 | 8.45  | 11.33 | 11.33 | 12.43 | 0.86 |
| 91.9996 | 273.54 | 16.77 | 13.88 | 14.74 | 14.90 | 1.18 |
| 92.0165 | 154.27 | 10.51 | 14.53 | 13.27 | 15.48 | 1.23 |
| 92.0249 | 37.04  | 16.91 | 14.39 | 14.59 | 14.77 | 1.60 |
| 92.0400 | 76.63  | 17.09 | 17.67 | 17.77 | 17.86 | 0.73 |
| 92.0576 | 43.89  | 18.11 | 16.05 | 16.17 | 16.30 | 1.39 |
| 92.0592 | 56.59  | 15.66 | 13.59 | 14.22 | 14.46 | 1.54 |
| 92.5035 | 145.55 | 17.90 | 14.15 | 13.61 | 16.34 | 1.46 |
| 92.5223 | 273.75 | 20.28 | 17.74 | 17.60 | 18.59 | 1.34 |
| 92.5759 | 133.26 | 16.40 | 17.24 | 17.56 | 16.78 | 0.82 |
| 92.9859 | 264.65 | 17.27 | 14.83 | 15.07 | 15.16 | 1.44 |
| 93.0154 | 70.94  | 16.19 | 14.19 | 14.77 | 14.37 | 1.05 |
| 93.0199 | 40.13  | 13.48 | 11.09 | 13.86 | 12.78 | 0.34 |
| 93.0448 | 78.35  | 18.96 | 18.22 | 18.39 | 18.28 | 1.10 |
| 93.0574 | 39.7   | 17.05 | 14.82 | 15.26 | 15.42 | 1.24 |
| 93.0699 | 279.62 | 17.68 | 15.42 | 15.45 | 15.38 | 1.37 |
| 93.4857 | 268.49 | 16.73 | 14.18 | 14.82 | 14.90 | 1.41 |
| 93.5039 | 136.76 | 19.87 | 16.45 | 17.04 | 17.34 | 1.39 |
| 93.6019 | 288.28 | 13.23 | 14.75 | 13.08 | 14.31 | 0.31 |
| 93.9841 | 276.21 | 20.35 | 19.01 | 19.34 | 18.94 | 0.73 |
| 93.9841 | 129    | 19.25 | 17.41 | 18.46 | 16.90 | 1.10 |
| 94.0400 | 192.79 | 14.25 | 16.34 | 16.78 | 15.73 | 1.03 |
| 94.0451 | 111.07 | 21.27 | 20.40 | 20.67 | 20.67 | 0.59 |
| 94.0652 | 192.81 | 17.67 | 16.22 | 16.39 | 16.62 | 1.07 |
| 94.5023 | 152.05 | 19.58 | 15.57 | 15.68 | 16.45 | 1.61 |
| 94.5208 | 262.86 | 17.18 | 14.21 | 14.17 | 14.94 | 1.69 |
| 94.5458 | 109.7  | 17.77 | 16.43 | 17.46 | 16.99 | 0.48 |
| 94.9297 | 41.85  | 15.81 | 16.03 | 16.15 | 16.19 | 0.38 |

|         |        |       |       |       |       |      |
|---------|--------|-------|-------|-------|-------|------|
| 95.0029 | 273.97 | 17.25 | 14.35 | 14.56 | 15.13 | 1.40 |
| 95.0125 | 70.58  | 18.56 | 18.05 | 17.95 | 17.94 | 0.58 |
| 95.0240 | 257.2  | 17.65 | 17.03 | 16.52 | 16.77 | 0.89 |
| 95.0439 | 97.64  | 18.00 | 17.36 | 17.66 | 17.68 | 0.39 |
| 95.0492 | 295.78 | 17.46 | 15.76 | 15.74 | 15.92 | 1.41 |
| 95.0604 | 209.02 | 17.48 | 15.24 | 15.61 | 16.11 | 1.40 |
| 95.0855 | 281.19 | 20.02 | 17.77 | 17.60 | 18.36 | 1.10 |
| 95.5017 | 276.25 | 19.35 | 16.62 | 16.96 | 16.80 | 1.43 |
| 95.5230 | 48.67  | 16.32 | 13.91 | 15.81 | 15.21 | 0.88 |
| 96.0080 | 203.6  | 16.45 | 13.66 | 14.31 | 14.15 | 1.72 |
| 96.0206 | 37.87  | 14.02 | 11.43 | 14.75 | 14.03 | 0.32 |
| 96.0285 | 81.47  | 15.99 | 16.17 | 16.08 | 16.47 | 0.17 |
| 96.0332 | 29.37  | 14.72 | 14.86 | 12.59 | 14.20 | 0.39 |
| 96.0444 | 288.52 | 19.44 | 18.10 | 18.14 | 18.34 | 0.79 |
| 96.0445 | 35.75  | 21.53 | 21.00 | 21.14 | 21.11 | 0.79 |
| 96.0682 | 72.5   | 15.82 | 15.43 | 15.99 | 14.92 | 0.10 |
| 96.0808 | 178.76 | 16.24 | 13.71 | 14.33 | 15.13 | 1.53 |
| 96.0888 | 22.52  | 15.93 | 9.03  | 8.75  | 12.08 | 1.62 |
| 96.0889 | 206.3  | 16.01 | 13.07 | 13.51 | 13.63 | 1.42 |
| 96.9218 | 50.23  | 21.80 | 22.56 | 22.66 | 22.52 | 1.00 |
| 96.9609 | 286.96 | 21.04 | 16.65 | 16.25 | 18.42 | 1.76 |
| 97.0009 | 88.81  | 17.60 | 18.84 | 19.14 | 18.96 | 1.05 |
| 97.0054 | 37.57  | 15.75 | 12.20 | 14.44 | 14.07 | 1.05 |
| 97.0076 | 297.02 | 14.95 | 12.48 | 11.73 | 13.20 | 1.14 |
| 97.0284 | 266.11 | 20.53 | 21.44 | 22.01 | 21.30 | 0.91 |
| 97.0397 | 280.34 | 16.73 | 15.01 | 14.67 | 15.38 | 1.48 |
| 97.0397 | 155.62 | 17.00 | 15.85 | 15.95 | 16.67 | 1.14 |
| 97.0478 | 31.9   | 17.14 | 15.09 | 15.20 | 15.71 | 1.79 |
| 97.0648 | 286.2  | 17.50 | 16.10 | 15.90 | 16.45 | 1.21 |
| 97.0649 | 22.39  | 17.47 | 15.75 | 15.42 | 15.58 | 1.14 |
| 97.0761 | 205.15 | 16.59 | 14.04 | 14.52 | 14.88 | 1.62 |
| 97.1012 | 288.16 | 18.47 | 16.31 | 16.24 | 16.37 | 1.33 |
| 97.5143 | 282.8  | 19.28 | 15.54 | 15.16 | 17.00 | 1.61 |
| 97.9644 | 19.69  | 15.83 | 8.73  | 9.26  | 9.70  | 2.09 |
| 97.9687 | 32.69  | 18.49 | 11.81 | 11.18 | 16.08 | 1.59 |
| 97.9913 | 274.16 | 23.85 | 22.44 | 22.79 | 22.42 | 0.72 |
| 97.9914 | 121.89 | 23.13 | 21.24 | 21.20 | 21.00 | 1.26 |
| 98.0060 | 63.35  | 15.28 | 14.32 | 14.43 | 14.27 | 0.56 |
| 98.0136 | 279.23 | 19.71 | 15.94 | 15.64 | 17.49 | 1.47 |
| 98.0237 | 74.71  | 16.27 | 13.03 | 14.14 | 14.05 | 1.49 |
| 98.0318 | 255.59 | 15.87 | 15.67 | 15.76 | 15.66 | 0.14 |
| 98.0601 | 272.61 | 19.59 | 17.79 | 17.62 | 17.89 | 0.95 |
| 98.0965 | 175.64 | 16.16 | 13.87 | 14.06 | 14.55 | 1.59 |
| 98.4706 | 299.74 | 16.85 | 14.83 | 15.07 | 15.13 | 0.93 |
| 98.5120 | 263.86 | 24.60 | 20.90 | 20.18 | 22.61 | 1.51 |
| 98.9189 | 50.94  | 20.65 | 21.31 | 21.46 | 21.25 | 0.90 |
| 98.9614 | 268.88 | 20.32 | 18.03 | 17.33 | 18.83 | 1.01 |
| 98.9754 | 22.3   | 20.09 | 20.43 | 20.52 | 19.84 | 0.32 |
| 98.9755 | 100.74 | 18.40 | 16.01 | 15.59 | 16.27 | 1.70 |
| 98.9842 | 139.2  | 24.49 | 26.27 | 26.11 | 26.10 | 0.99 |
| 98.9947 | 259.69 | 18.15 | 14.89 | 15.01 | 15.65 | 1.76 |
| 98.9983 | 93.75  | 15.24 | 16.22 | 16.33 | 16.29 | 0.65 |
| 99.0041 | 36.12  | 16.74 | 11.36 | 11.92 | 12.47 | 1.96 |
| 99.0098 | 50.21  | 19.80 | 13.80 | 13.29 | 15.44 | 1.77 |
| 99.0135 | 284.91 | 19.78 | 16.29 | 15.97 | 17.21 | 1.61 |
| 99.0440 | 283.32 | 20.41 | 20.01 | 19.60 | 19.76 | 0.33 |

|          |        |       |       |       |       |      |
|----------|--------|-------|-------|-------|-------|------|
| 99.0553  | 195.01 | 17.57 | 14.80 | 15.22 | 15.72 | 1.64 |
| 99.0634  | 217.39 | 16.24 | 13.70 | 14.21 | 14.47 | 1.58 |
| 99.0806  | 169.81 | 16.65 | 14.00 | 13.86 | 14.90 | 1.56 |
| 99.0917  | 29.72  | 16.68 | 15.96 | 15.94 | 15.69 | 0.40 |
| 99.0917  | 206.57 | 15.99 | 13.43 | 13.42 | 14.19 | 1.44 |
| 99.4956  | 101.81 | 18.81 | 16.79 | 17.81 | 16.93 | 1.20 |
| 99.5122  | 160.39 | 20.88 | 20.54 | 19.49 | 20.74 | 0.21 |
| 99.5311  | 272.39 | 20.99 | 19.38 | 18.74 | 19.66 | 1.07 |
| 99.9593  | 30.03  | 19.10 | 18.04 | 18.92 | 18.05 | 0.70 |
| 99.9799  | 91.57  | 16.90 | 18.38 | 19.28 | 18.88 | 1.30 |
| 99.9874  | 264.46 | 15.95 | 7.22  | 7.50  | 9.05  | 1.62 |
| 99.9905  | 132.96 | 10.94 | 13.48 | 14.05 | 13.90 | 1.45 |
| 100.0112 | 43.3   | 21.73 | 19.54 | 20.46 | 19.61 | 1.24 |
| 100.0139 | 269.17 | 19.40 | 16.04 | 15.28 | 17.72 | 1.60 |
| 100.0139 | 174.75 | 18.59 | 15.53 | 15.03 | 17.29 | 1.35 |
| 100.0216 | 52.71  | 17.88 | 18.16 | 17.76 | 17.75 | 0.04 |
| 100.0244 | 94.6   | 21.41 | 21.63 | 22.17 | 21.70 | 0.37 |
| 100.0287 | 273.38 | 19.31 | 16.69 | 16.64 | 17.18 | 1.59 |
| 100.0288 | 145.46 | 18.59 | 15.82 | 15.73 | 16.06 | 1.61 |
| 100.0328 | 266.7  | 16.76 | 14.07 | 14.51 | 15.18 | 1.44 |
| 100.0393 | 290.94 | 17.97 | 16.91 | 16.80 | 16.87 | 0.91 |
| 100.0474 | 213.09 | 16.24 | 13.51 | 13.76 | 14.26 | 1.68 |
| 100.0506 | 199.45 | 16.70 | 13.18 | 13.40 | 13.92 | 1.76 |
| 100.0757 | 218.21 | 20.24 | 17.75 | 18.22 | 19.32 | 1.00 |
| 100.1121 | 159.05 | 18.92 | 20.28 | 20.69 | 20.65 | 0.94 |
| 100.4987 | 88.69  | 19.99 | 20.30 | 20.49 | 19.83 | 0.17 |
| 100.5099 | 272.1  | 21.02 | 19.19 | 18.56 | 19.18 | 0.78 |
| 100.5128 | 39.14  | 17.66 | 14.11 | 15.43 | 14.46 | 1.37 |
| 100.5208 | 34.84  | 13.93 | 11.11 | 14.27 | 14.48 | 0.47 |
| 100.5265 | 35.58  | 16.83 | 15.29 | 17.42 | 16.05 | 0.39 |
| 100.9170 | 48.78  | 16.73 | 16.84 | 16.93 | 16.97 | 0.23 |
| 100.9568 | 268.94 | 19.30 | 16.30 | 15.44 | 17.59 | 1.34 |
| 100.9671 | 23.59  | 16.15 | 15.16 | 16.58 | 15.40 | 0.32 |
| 100.9821 | 87.27  | 18.53 | 18.29 | 18.62 | 17.95 | 0.10 |
| 100.9885 | 194.33 | 17.04 | 19.41 | 19.87 | 17.14 | 0.73 |
| 100.9911 | 30.7   | 14.37 | 13.41 | 15.86 | 14.88 | 0.09 |
| 101.0073 | 98.16  | 17.98 | 15.49 | 15.19 | 15.59 | 1.49 |
| 101.0116 | 165.35 | 17.17 | 14.12 | 13.64 | 15.45 | 1.26 |
| 101.0234 | 201.09 | 15.84 | 10.56 | 11.69 | 12.07 | 1.75 |
| 101.0248 | 255.96 | 17.27 | 15.71 | 15.05 | 15.65 | 1.17 |
| 101.0251 | 55.26  | 18.90 | 20.29 | 20.25 | 20.05 | 1.16 |
| 101.0346 | 203.74 | 16.85 | 13.84 | 14.20 | 14.59 | 1.76 |
| 101.0602 | 277    | 18.21 | 16.00 | 15.85 | 16.86 | 0.96 |
| 101.0710 | 156.99 | 16.92 | 18.94 | 16.44 | 18.82 | 0.52 |
| 101.0710 | 87.96  | 21.95 | 21.95 | 22.25 | 21.80 | 0.19 |
| 101.0791 | 176.53 | 16.68 | 13.60 | 14.59 | 14.64 | 1.67 |
| 101.1074 | 76.32  | 14.76 | 14.82 | 15.09 | 14.90 | 0.07 |
| 101.1155 | 188.21 | 15.09 | 13.58 | 13.98 | 14.34 | 0.76 |
| 101.4966 | 109.1  | 16.01 | 14.31 | 14.51 | 14.31 | 0.87 |
| 101.5087 | 265.59 | 19.29 | 15.69 | 15.32 | 17.35 | 1.54 |
| 101.5088 | 148.98 | 18.28 | 15.14 | 14.96 | 17.36 | 1.47 |
| 101.5141 | 85.07  | 15.12 | 13.95 | 13.61 | 14.48 | 0.37 |
| 101.5181 | 25.05  | 12.97 | 14.96 | 15.86 | 14.86 | 1.05 |
| 101.9770 | 87.82  | 15.73 | 15.76 | 16.58 | 16.70 | 0.40 |
| 101.9843 | 257.29 | 18.85 | 15.55 | 15.90 | 16.42 | 1.64 |
| 102.0070 | 91.4   | 16.68 | 18.17 | 18.98 | 17.85 | 0.99 |

|          |        |       |       |       |       |      |
|----------|--------|-------|-------|-------|-------|------|
| 102.0130 | 301.39 | 18.34 | 17.18 | 16.31 | 17.67 | 1.06 |
| 102.0217 | 96.22  | 19.08 | 18.87 | 19.56 | 19.13 | 0.11 |
| 102.0339 | 173.18 | 22.41 | 21.16 | 20.32 | 21.60 | 0.85 |
| 102.0372 | 41.65  | 14.68 | 14.71 | 14.57 | 15.36 | 0.05 |
| 102.0459 | 66.89  | 20.06 | 19.22 | 19.52 | 19.54 | 1.08 |
| 102.0550 | 75.47  | 24.65 | 25.13 | 24.83 | 24.80 | 0.66 |
| 102.0744 | 69.01  | 17.12 | 16.44 | 16.58 | 16.67 | 0.98 |
| 102.0914 | 65.47  | 21.62 | 21.55 | 22.17 | 21.76 | 0.32 |
| 102.1044 | 75.74  | 15.61 | 15.17 | 15.01 | 15.23 | 0.60 |
| 102.1278 | 148.2  | 17.22 | 19.39 | 20.33 | 19.81 | 0.85 |
| 102.5091 | 275.72 | 19.29 | 17.29 | 17.50 | 17.15 | 1.24 |
| 102.5126 | 65.59  | 16.61 | 15.11 | 15.02 | 15.33 | 0.82 |
| 102.5219 | 98.8   | 17.56 | 14.85 | 14.71 | 15.27 | 1.53 |
| 102.5355 | 145.86 | 19.59 | 16.16 | 15.95 | 16.93 | 1.65 |
| 102.9115 | 273.1  | 15.52 | 12.07 | 12.97 | 14.23 | 0.94 |
| 102.9256 | 273.98 | 17.98 | 16.25 | 16.77 | 17.08 | 1.02 |
| 102.9703 | 276.25 | 20.95 | 18.14 | 18.08 | 18.91 | 1.02 |
| 102.9894 | 147.99 | 16.83 | 15.06 | 15.05 | 15.45 | 1.41 |
| 103.0014 | 88.53  | 20.08 | 20.53 | 20.88 | 19.91 | 0.25 |
| 103.0150 | 88.04  | 15.95 | 15.75 | 16.12 | 15.73 | 0.06 |
| 103.0391 | 66.36  | 21.45 | 21.27 | 21.87 | 21.45 | 0.12 |
| 103.0499 | 40.03  | 16.67 | 14.09 | 14.71 | 14.95 | 1.30 |
| 103.0521 | 63.21  | 16.39 | 15.09 | 15.02 | 15.03 | 1.33 |
| 103.0544 | 49.08  | 22.11 | 21.22 | 21.61 | 21.49 | 1.18 |
| 103.0584 | 74.11  | 20.00 | 20.41 | 20.44 | 20.04 | 0.67 |
| 103.0613 | 62.5   | 14.82 | 13.59 | 14.06 | 13.69 | 0.56 |
| 103.0766 | 175.49 | 16.82 | 14.28 | 14.71 | 14.27 | 1.44 |
| 103.0949 | 43     | 17.30 | 15.26 | 15.98 | 16.08 | 1.35 |
| 103.1311 | 172.41 | 12.78 | 14.48 | 14.37 | 14.10 | 0.72 |
| 103.5031 | 110.6  | 16.50 | 14.57 | 14.73 | 14.50 | 1.07 |
| 103.5076 | 277.73 | 18.76 | 16.48 | 16.79 | 16.58 | 1.41 |
| 103.5156 | 90.13  | 16.07 | 15.06 | 14.87 | 14.94 | 0.56 |
| 103.5204 | 276.03 | 19.14 | 14.65 | 15.18 | 16.12 | 1.79 |
| 103.5384 | 74.71  | 14.93 | 16.26 | 16.06 | 15.46 | 0.59 |
| 103.7925 | 34.13  | 16.69 | 14.32 | 15.49 | 15.38 | 1.09 |
| 103.9203 | 32.4   | 15.11 | 15.28 | 13.11 | 13.56 | 0.43 |
| 103.9556 | 180.88 | 18.14 | 17.55 | 19.11 | 20.31 | 0.11 |
| 103.9993 | 107.84 | 16.03 | 15.22 | 14.64 | 14.99 | 0.57 |
| 104.0087 | 300.29 | 17.78 | 16.27 | 15.31 | 17.12 | 1.13 |
| 104.0177 | 85.22  | 19.25 | 21.68 | 21.74 | 21.28 | 1.33 |
| 104.0303 | 173.09 | 17.62 | 14.09 | 13.90 | 14.97 | 1.75 |
| 104.0376 | 34.55  | 17.00 | 15.12 | 15.40 | 15.92 | 1.14 |
| 104.0421 | 38.9   | 17.11 | 15.08 | 16.45 | 16.47 | 0.93 |
| 104.0495 | 39.72  | 15.37 | 9.32  | 9.62  | 10.39 | 1.55 |
| 104.0530 | 56.14  | 20.90 | 19.72 | 20.53 | 20.05 | 1.03 |
| 104.0663 | 34.42  | 17.54 | 15.97 | 16.46 | 16.87 | 0.80 |
| 104.0941 | 34.01  | 19.21 | 18.17 | 18.65 | 18.59 | 1.16 |
| 104.1070 | 43.44  | 30.48 | 30.00 | 29.95 | 30.46 | 1.08 |
| 104.1105 | 37.89  | 17.96 | 16.83 | 17.52 | 17.24 | 0.48 |
| 104.1460 | 34.42  | 19.12 | 17.93 | 18.23 | 18.40 | 1.05 |
| 104.1720 | 34.84  | 17.08 | 14.13 | 14.84 | 15.81 | 1.17 |
| 104.1766 | 34.66  | 17.06 | 14.69 | 15.39 | 15.69 | 1.13 |
| 104.4230 | 34.39  | 16.97 | 15.17 | 15.73 | 15.96 | 1.08 |
| 104.4939 | 258.57 | 17.06 | 14.45 | 14.63 | 15.07 | 1.48 |
| 104.5070 | 280.81 | 18.26 | 15.84 | 16.11 | 15.93 | 1.40 |
| 104.5183 | 84.54  | 15.26 | 18.17 | 18.27 | 17.66 | 1.22 |

|          |        |       |       |       |       |      |
|----------|--------|-------|-------|-------|-------|------|
| 104.5264 | 85.01  | 16.77 | 17.17 | 17.56 | 17.39 | 0.75 |
| 104.9078 | 279.25 | 19.93 | 17.65 | 18.19 | 17.58 | 1.18 |
| 104.9078 | 118.8  | 17.87 | 16.41 | 16.76 | 15.83 | 0.93 |
| 104.9551 | 269.71 | 17.07 | 14.44 | 14.76 | 14.87 | 1.21 |
| 104.9929 | 39.46  | 18.60 | 17.32 | 16.69 | 16.16 | 0.89 |
| 104.9978 | 98.55  | 14.25 | 13.75 | 12.28 | 14.51 | 0.39 |
| 105.0005 | 55.01  | 17.51 | 14.43 | 14.79 | 15.39 | 1.19 |
| 105.0034 | 20.03  | 12.83 | 17.48 | 17.33 | 17.49 | 1.98 |
| 105.0167 | 84.77  | 16.46 | 18.37 | 18.45 | 18.20 | 1.51 |
| 105.0335 | 275.63 | 17.60 | 16.74 | 15.54 | 15.81 | 0.99 |
| 105.0446 | 33.14  | 20.22 | 19.49 | 19.67 | 19.63 | 1.04 |
| 105.0564 | 44.12  | 16.65 | 14.17 | 15.27 | 14.52 | 0.89 |
| 105.0651 | 181.3  | 15.88 | 14.01 | 14.61 | 13.52 | 0.87 |
| 105.0678 | 101.94 | 14.94 | 14.07 | 14.45 | 14.33 | 0.42 |
| 105.0699 | 174.53 | 18.32 | 17.58 | 17.90 | 17.69 | 0.53 |
| 105.0740 | 187.78 | 17.76 | 14.22 | 14.06 | 14.99 | 1.73 |
| 105.1040 | 38.4   | 25.65 | 25.32 | 25.54 | 25.19 | 0.29 |
| 105.1103 | 41.58  | 26.49 | 25.90 | 26.19 | 26.29 | 0.82 |
| 105.1131 | 39.81  | 21.26 | 20.88 | 21.30 | 21.08 | 0.42 |
| 105.4921 | 275.33 | 20.32 | 18.35 | 17.90 | 18.27 | 1.16 |
| 105.4921 | 166.33 | 19.47 | 18.04 | 18.00 | 17.94 | 1.30 |
| 105.9538 | 23     | 19.19 | 17.95 | 18.30 | 18.59 | 1.37 |
| 105.9538 | 190.18 | 18.16 | 19.88 | 20.13 | 18.88 | 1.04 |
| 105.9630 | 296.04 | 17.45 | 14.98 | 15.13 | 15.03 | 1.26 |
| 105.9780 | 194.95 | 11.09 | 14.43 | 14.24 | 15.13 | 1.02 |
| 105.9957 | 56.06  | 16.17 | 12.86 | 12.88 | 12.74 | 1.33 |
| 106.0039 | 52.35  | 17.64 | 15.79 | 16.08 | 15.21 | 0.95 |
| 106.0105 | 37.71  | 16.37 | 14.52 | 16.55 | 15.56 | 0.49 |
| 106.0232 | 261.23 | 18.66 | 14.67 | 14.59 | 15.63 | 1.81 |
| 106.0287 | 31.26  | 18.70 | 17.74 | 17.94 | 17.99 | 1.23 |
| 106.0288 | 170.7  | 16.87 | 14.19 | 14.77 | 14.97 | 1.68 |
| 106.0368 | 28.59  | 14.55 | 16.32 | 11.26 | 11.68 | 0.34 |
| 106.0499 | 151.68 | 17.57 | 19.37 | 16.18 | 19.14 | 0.24 |
| 106.0499 | 87.6   | 23.56 | 23.04 | 23.49 | 23.17 | 0.64 |
| 106.0651 | 298.57 | 16.44 | 14.72 | 14.73 | 14.66 | 0.96 |
| 106.0652 | 199.17 | 17.74 | 14.07 | 15.01 | 15.19 | 1.69 |
| 106.0684 | 265.45 | 20.68 | 20.15 | 20.09 | 18.91 | 0.36 |
| 106.0862 | 35.37  | 15.89 | 14.97 | 14.08 | 13.76 | 0.54 |
| 106.0863 | 192.68 | 16.07 | 13.43 | 13.61 | 14.36 | 1.62 |
| 106.1073 | 35.99  | 21.16 | 20.93 | 21.25 | 20.61 | 0.15 |
| 106.1112 | 39.54  | 21.51 | 21.04 | 21.47 | 21.27 | 0.61 |
| 106.1137 | 35.75  | 20.49 | 19.98 | 20.40 | 20.22 | 0.63 |
| 106.5208 | 79.14  | 16.31 | 13.51 | 14.95 | 15.67 | 0.71 |
| 106.9507 | 47.72  | 18.14 | 17.98 | 18.13 | 18.16 | 0.15 |
| 106.9632 | 261.38 | 15.49 | 10.49 | 10.02 | 11.31 | 1.34 |
| 106.9990 | 55.1   | 21.17 | 19.47 | 19.83 | 18.49 | 0.96 |
| 107.0128 | 71.99  | 16.72 | 14.66 | 15.13 | 14.75 | 1.09 |
| 107.0397 | 99.36  | 16.49 | 15.72 | 15.82 | 15.57 | 0.46 |
| 107.0470 | 71.77  | 15.06 | 12.45 | 13.23 | 13.20 | 1.08 |
| 107.0492 | 287.54 | 17.18 | 15.56 | 15.60 | 15.68 | 1.42 |
| 107.0524 | 295.05 | 16.83 | 15.58 | 15.34 | 13.99 | 0.82 |
| 107.0604 | 287.3  | 17.43 | 15.15 | 14.83 | 15.47 | 1.49 |
| 107.0604 | 141.42 | 18.05 | 15.68 | 15.64 | 16.66 | 1.40 |
| 107.0654 | 138.16 | 17.53 | 18.25 | 17.94 | 17.75 | 0.50 |
| 107.0703 | 192.04 | 16.48 | 14.22 | 14.58 | 14.84 | 1.48 |
| 107.0855 | 23.95  | 17.29 | 15.31 | 15.93 | 16.42 | 1.37 |

|          |        |       |       |       |       |      |
|----------|--------|-------|-------|-------|-------|------|
| 107.0855 | 296.35 | 17.75 | 16.47 | 16.42 | 16.68 | 1.01 |
| 107.4759 | 298.76 | 16.69 | 14.12 | 14.12 | 14.38 | 1.10 |
| 107.5049 | 34.75  | 14.66 | 15.24 | 17.08 | 14.98 | 0.57 |
| 107.5286 | 75.29  | 16.57 | 11.54 | 13.65 | 14.91 | 1.15 |
| 107.5365 | 85.96  | 16.09 | 18.22 | 18.16 | 17.63 | 1.04 |
| 107.5671 | 130.38 | 13.54 | 13.25 | 13.73 | 13.43 | 0.05 |
| 107.9505 | 287.41 | 16.86 | 10.55 | 10.42 | 12.86 | 1.80 |
| 107.9599 | 288.87 | 17.04 | 14.14 | 14.49 | 14.50 | 1.35 |
| 107.9967 | 36.37  | 14.52 | 12.75 | 15.93 | 13.19 | 0.21 |
| 108.0114 | 78.77  | 21.99 | 22.35 | 22.39 | 22.22 | 0.42 |
| 108.0149 | 38.86  | 17.69 | 8.43  | 8.70  | 11.03 | 1.92 |
| 108.0444 | 291.84 | 18.76 | 17.23 | 17.13 | 17.08 | 0.78 |
| 108.0545 | 61.17  | 15.99 | 13.38 | 13.87 | 14.18 | 1.53 |
| 108.0558 | 206.83 | 16.47 | 12.24 | 12.33 | 13.72 | 1.34 |
| 108.0600 | 45.24  | 16.28 | 15.03 | 14.58 | 15.30 | 0.75 |
| 108.0808 | 19.46  | 16.77 | 14.18 | 16.18 | 15.56 | 0.94 |
| 108.0808 | 190.89 | 16.86 | 14.14 | 14.20 | 14.90 | 1.64 |
| 108.5009 | 111.53 | 19.63 | 18.18 | 19.07 | 18.14 | 0.99 |
| 108.5132 | 38.56  | 16.79 | 15.02 | 17.02 | 16.12 | 0.48 |
| 108.5489 | 28.26  | 15.70 | 16.77 | 13.75 | 13.97 | 0.33 |
| 108.5708 | 286.51 | 16.08 | 13.18 | 13.32 | 13.25 | 1.13 |
| 108.5708 | 91.55  | 16.45 | 17.13 | 17.24 | 17.07 | 0.70 |
| 109.0148 | 55.5   | 16.09 | 14.54 | 15.44 | 14.72 | 0.67 |
| 109.0227 | 126.17 | 17.57 | 9.76  | 8.97  | 12.77 | 1.64 |
| 109.0228 | 21.84  | 18.83 | 10.75 | 10.89 | 12.07 | 1.74 |
| 109.0284 | 258.76 | 20.24 | 20.30 | 20.80 | 20.68 | 0.25 |
| 109.0509 | 38.25  | 17.37 | 15.63 | 15.88 | 15.86 | 1.25 |
| 109.0761 | 221.3  | 18.43 | 16.07 | 16.88 | 16.69 | 1.49 |
| 109.0761 | 60.17  | 19.63 | 19.55 | 19.37 | 19.55 | 0.16 |
| 109.1011 | 25.13  | 18.46 | 16.87 | 17.30 | 17.89 | 1.39 |
| 109.1012 | 280.27 | 20.06 | 18.33 | 17.87 | 18.43 | 0.93 |
| 109.5040 | 94.96  | 18.23 | 18.90 | 18.47 | 18.61 | 0.33 |
| 109.5317 | 35.72  | 14.01 | 12.84 | 15.02 | 13.62 | 0.10 |
| 109.9786 | 295.33 | 18.08 | 16.10 | 16.00 | 16.06 | 1.33 |
| 109.9958 | 250.83 | 16.75 | 15.20 | 15.24 | 15.72 | 1.27 |
| 109.9958 | 126.9  | 17.58 | 15.45 | 17.02 | 15.41 | 1.00 |
| 110.0088 | 92.83  | 20.96 | 21.91 | 22.17 | 22.20 | 0.77 |
| 110.0125 | 90     | 18.84 | 17.24 | 17.13 | 17.29 | 1.35 |
| 110.0201 | 183.35 | 20.28 | 16.10 | 16.30 | 17.51 | 1.51 |
| 110.0271 | 67.21  | 22.57 | 22.63 | 23.14 | 23.04 | 0.36 |
| 110.0318 | 248.77 | 15.72 | 14.55 | 14.86 | 15.70 | 0.51 |
| 110.0349 | 277.97 | 17.07 | 18.42 | 18.97 | 18.18 | 1.06 |
| 110.0600 | 290.91 | 18.85 | 18.66 | 18.21 | 18.67 | 0.18 |
| 110.0713 | 76.61  | 23.42 | 23.04 | 23.19 | 23.08 | 0.57 |
| 110.0794 | 57.16  | 16.01 | 14.38 | 13.36 | 14.87 | 0.87 |
| 110.1046 | 213.13 | 16.42 | 13.64 | 14.01 | 14.34 | 1.74 |
| 110.5195 | 33.21  | 17.28 | 9.14  | 10.96 | 10.94 | 1.53 |
| 110.9754 | 91.63  | 17.19 | 14.86 | 14.52 | 15.19 | 1.57 |
| 110.9873 | 69.97  | 19.64 | 15.30 | 16.42 | 17.64 | 1.68 |
| 111.0036 | 115.66 | 20.67 | 19.02 | 19.92 | 18.98 | 1.16 |
| 111.0096 | 87.71  | 17.30 | 18.51 | 18.82 | 18.94 | 0.95 |
| 111.0123 | 94.63  | 17.59 | 20.16 | 20.68 | 19.57 | 1.25 |
| 111.0202 | 285.62 | 18.49 | 16.88 | 15.91 | 17.52 | 0.78 |
| 111.0263 | 65.68  | 16.53 | 15.07 | 15.56 | 15.60 | 0.92 |
| 111.0305 | 63.21  | 16.76 | 15.72 | 16.30 | 16.70 | 0.52 |
| 111.0386 | 31.8   | 18.34 | 17.40 | 15.93 | 17.77 | 1.00 |



|          |        |       |       |       |       |      |
|----------|--------|-------|-------|-------|-------|------|
| 111.0391 | 259.65 | 17.54 | 15.43 | 15.00 | 16.15 | 1.25 |
| 111.0441 | 293.54 | 18.25 | 17.46 | 17.78 | 17.45 | 0.39 |
| 111.0441 | 140    | 18.70 | 18.07 | 18.00 | 18.10 | 0.53 |
| 111.0553 | 288.49 | 17.20 | 16.13 | 16.02 | 16.20 | 0.93 |
| 111.0592 | 45.16  | 16.66 | 14.62 | 14.94 | 14.73 | 1.06 |
| 111.0634 | 177.91 | 16.76 | 13.69 | 13.67 | 14.56 | 1.76 |
| 111.0684 | 77.02  | 16.76 | 14.37 | 14.92 | 15.22 | 1.69 |
| 111.0747 | 76.35  | 19.13 | 18.36 | 18.69 | 18.49 | 1.06 |
| 111.0804 | 290.43 | 17.84 | 16.26 | 16.15 | 16.16 | 1.21 |
| 111.0917 | 169.76 | 16.38 | 13.70 | 13.93 | 14.49 | 1.79 |
| 111.1168 | 22.36  | 17.13 | 14.33 | 14.57 | 15.46 | 1.73 |
| 111.1168 | 290.12 | 17.91 | 15.78 | 15.94 | 16.14 | 1.31 |
| 111.5054 | 103.16 | 16.34 | 15.12 | 14.61 | 15.12 | 0.89 |
| 111.5129 | 93.38  | 18.90 | 16.61 | 17.28 | 16.90 | 1.47 |
| 111.5192 | 32.43  | 19.19 | 17.81 | 18.72 | 18.09 | 0.80 |
| 111.5219 | 150.6  | 17.39 | 13.23 | 12.74 | 15.74 | 1.46 |
| 111.5272 | 98.06  | 17.09 | 15.34 | 15.27 | 15.01 | 0.93 |
| 111.9683 | 280.45 | 21.91 | 17.46 | 17.13 | 19.33 | 1.65 |
| 111.9844 | 282.29 | 20.43 | 16.17 | 15.70 | 17.86 | 1.70 |
| 112.0066 | 249.12 | 18.18 | 14.26 | 14.64 | 16.02 | 1.75 |
| 112.0066 | 90.05  | 21.36 | 22.17 | 22.24 | 21.91 | 0.54 |
| 112.0111 | 87.35  | 14.54 | 16.60 | 17.20 | 16.10 | 1.03 |
| 112.0180 | 150.3  | 18.47 | 16.61 | 15.98 | 18.61 | 0.83 |
| 112.0282 | 37.2   | 17.04 | 12.93 | 15.27 | 15.67 | 1.17 |
| 112.0393 | 286.98 | 17.93 | 16.75 | 16.68 | 16.73 | 1.03 |
| 112.0506 | 267.51 | 21.52 | 22.53 | 22.05 | 21.51 | 0.72 |
| 112.0618 | 274.62 | 16.66 | 16.58 | 16.28 | 15.74 | 0.24 |
| 112.0757 | 291.44 | 18.04 | 16.65 | 16.76 | 16.67 | 1.02 |
| 112.0870 | 61.67  | 20.91 | 21.23 | 21.31 | 21.48 | 0.35 |
| 112.1121 | 272.54 | 18.57 | 20.30 | 19.49 | 19.39 | 0.86 |
| 112.5050 | 91.75  | 14.18 | 13.41 | 13.68 | 13.72 | 0.22 |
| 112.5084 | 103.63 | 17.45 | 16.82 | 16.39 | 16.54 | 0.54 |
| 112.5152 | 92.56  | 17.46 | 15.16 | 14.86 | 15.60 | 1.42 |
| 112.5203 | 109.39 | 17.42 | 14.57 | 14.98 | 15.14 | 1.59 |
| 112.5428 | 78.04  | 15.53 | 15.98 | 15.81 | 15.82 | 0.29 |
| 112.8958 | 47.57  | 26.31 | 25.90 | 25.92 | 25.80 | 0.74 |
| 112.9559 | 23.95  | 18.95 | 8.43  | 8.76  | 12.22 | 2.03 |
| 112.9668 | 268.22 | 22.43 | 18.04 | 17.61 | 19.74 | 1.76 |
| 112.9763 | 27.84  | 17.65 | 9.05  | 9.59  | 10.62 | 2.07 |
| 112.9784 | 272.05 | 22.27 | 21.26 | 21.38 | 21.45 | 0.59 |
| 112.9866 | 266.35 | 15.71 | 9.73  | 9.06  | 11.73 | 1.32 |
| 112.9911 | 91.72  | 19.24 | 14.38 | 15.19 | 15.69 | 1.68 |
| 113.0000 | 107.22 | 16.70 | 15.51 | 15.18 | 15.37 | 0.91 |
| 113.0046 | 105.53 | 17.74 | 17.17 | 16.63 | 16.97 | 0.71 |
| 113.0095 | 28.92  | 13.53 | 13.94 | 13.95 | 14.32 | 0.36 |
| 113.0189 | 96.09  | 15.07 | 14.40 | 15.24 | 14.13 | 0.25 |
| 113.0228 | 88.09  | 19.54 | 21.13 | 21.33 | 20.90 | 1.13 |
| 113.0346 | 265.24 | 22.87 | 21.96 | 21.56 | 22.04 | 0.61 |
| 113.0476 | 253.06 | 13.14 | 13.94 | 14.55 | 13.48 | 0.45 |
| 113.0477 | 142.47 | 12.38 | 14.15 | 14.39 | 13.94 | 0.80 |
| 113.0539 | 257.02 | 16.83 | 17.88 | 17.31 | 16.80 | 0.95 |
| 113.0600 | 285.84 | 17.62 | 16.05 | 16.20 | 16.28 | 1.31 |
| 113.0710 | 253.07 | 18.20 | 16.86 | 16.05 | 16.82 | 1.00 |
| 113.0710 | 80.85  | 19.90 | 19.73 | 20.21 | 19.86 | 0.05 |
| 113.0800 | 198.52 | 16.00 | 12.94 | 13.55 | 13.75 | 1.57 |
| 113.0904 | 69.69  | 16.91 | 16.14 | 15.95 | 16.53 | 0.48 |

|          |        |       |       |       |       |      |
|----------|--------|-------|-------|-------|-------|------|
| 113.0962 | 184.76 | 16.61 | 13.68 | 14.03 | 14.67 | 1.69 |
| 113.1074 | 170.96 | 17.04 | 16.17 | 16.77 | 16.82 | 0.52 |
| 113.1155 | 35.75  | 11.91 | 12.77 | 10.59 | 13.86 | 0.06 |
| 113.1325 | 23.76  | 13.79 | 8.38  | 7.67  | 7.68  | 1.44 |
| 113.5048 | 119.33 | 16.69 | 14.65 | 15.88 | 15.02 | 1.13 |
| 113.5208 | 84.91  | 14.93 | 15.61 | 15.09 | 15.84 | 0.40 |
| 113.5235 | 66.64  | 15.61 | 17.86 | 17.75 | 17.55 | 1.32 |
| 113.5287 | 73.36  | 17.70 | 15.98 | 16.46 | 16.57 | 1.20 |
| 113.5317 | 85.66  | 17.57 | 19.34 | 19.64 | 19.25 | 1.59 |
| 113.9637 | 280.37 | 26.28 | 23.53 | 23.14 | 24.69 | 1.40 |
| 113.9638 | 55.11  | 26.00 | 21.20 | 21.50 | 23.52 | 1.92 |
| 114.0031 | 103.49 | 15.98 | 15.76 | 15.23 | 15.48 | 0.28 |
| 114.0089 | 26.21  | 16.37 | 10.16 | 11.63 | 11.75 | 1.80 |
| 114.0213 | 78.16  | 17.27 | 17.53 | 17.90 | 17.62 | 0.54 |
| 114.0319 | 59.97  | 16.64 | 15.23 | 15.52 | 15.87 | 0.78 |
| 114.0380 | 275.65 | 17.07 | 15.68 | 15.19 | 15.74 | 1.12 |
| 114.0380 | 32.3   | 18.46 | 15.95 | 16.20 | 16.46 | 1.68 |
| 114.0381 | 162.68 | 17.84 | 16.56 | 16.80 | 16.69 | 1.11 |
| 114.0550 | 272.37 | 20.47 | 18.98 | 18.45 | 19.61 | 0.85 |
| 114.0606 | 93.09  | 17.20 | 17.46 | 17.42 | 17.42 | 0.20 |
| 114.0645 | 291.31 | 18.95 | 18.67 | 18.82 | 18.30 | 0.14 |
| 114.0662 | 270.27 | 20.93 | 20.07 | 19.85 | 20.62 | 0.44 |
| 114.0733 | 220.18 | 16.46 | 17.03 | 16.69 | 17.02 | 0.53 |
| 114.0913 | 273.59 | 20.60 | 19.72 | 18.57 | 19.53 | 0.73 |
| 114.1026 | 58.19  | 15.88 | 14.52 | 14.73 | 15.30 | 0.82 |
| 114.1277 | 31.94  | 16.44 | 13.91 | 14.81 | 14.93 | 0.65 |
| 114.4783 | 268.73 | 17.01 | 10.71 | 11.42 | 11.72 | 1.52 |
| 114.4974 | 144.94 | 17.14 | 15.49 | 15.08 | 15.96 | 1.32 |
| 114.5127 | 32.82  | 11.06 | 13.34 | 16.03 | 13.71 | 0.88 |
| 114.5228 | 96.24  | 16.08 | 15.00 | 15.48 | 15.06 | 0.70 |
| 114.5305 | 86.08  | 15.74 | 15.47 | 15.71 | 15.89 | 0.10 |
| 114.8929 | 48.92  | 25.17 | 24.88 | 24.88 | 24.60 | 0.49 |
| 114.9641 | 288.09 | 20.21 | 16.36 | 15.95 | 17.41 | 1.77 |
| 114.9670 | 291.04 | 19.97 | 16.39 | 15.89 | 17.40 | 1.66 |
| 114.9715 | 291.08 | 20.47 | 17.18 | 16.75 | 18.63 | 1.31 |
| 114.9929 | 134.64 | 16.70 | 14.89 | 15.48 | 14.75 | 1.10 |
| 115.0115 | 97.58  | 18.13 | 18.12 | 18.77 | 18.40 | 0.30 |
| 115.0284 | 270.12 | 20.21 | 16.65 | 16.34 | 17.36 | 1.67 |
| 115.0285 | 145.37 | 19.23 | 15.28 | 15.04 | 16.13 | 1.82 |
| 115.0390 | 290.59 | 18.84 | 17.96 | 18.17 | 18.16 | 0.42 |
| 115.0467 | 263.41 | 17.19 | 12.78 | 13.48 | 13.72 | 1.51 |
| 115.0497 | 288.68 | 17.55 | 16.59 | 16.52 | 16.61 | 0.59 |
| 115.0542 | 277.91 | 19.27 | 17.10 | 17.10 | 17.42 | 1.10 |
| 115.0583 | 185.5  | 16.79 | 14.15 | 14.11 | 14.78 | 1.72 |
| 115.0696 | 185.82 | 16.77 | 14.61 | 15.32 | 14.79 | 1.40 |
| 115.0761 | 277.75 | 17.07 | 14.80 | 15.25 | 15.30 | 1.43 |
| 115.0867 | 74.36  | 20.15 | 21.10 | 21.04 | 20.79 | 0.70 |
| 115.0951 | 23.15  | 16.76 | 14.98 | 12.26 | 16.16 | 1.09 |
| 115.0951 | 184.3  | 16.74 | 14.24 | 13.95 | 14.87 | 1.56 |
| 115.5258 | 80.39  | 19.02 | 21.97 | 21.94 | 21.58 | 1.63 |
| 115.5301 | 258.25 | 17.18 | 12.65 | 12.46 | 14.38 | 1.51 |
| 115.5516 | 147.97 | 10.90 | 13.71 | 13.74 | 13.94 | 1.07 |
| 115.5787 | 122.79 | 17.48 | 18.70 | 18.65 | 18.37 | 0.97 |
| 115.9430 | 25.92  | 16.93 | 10.69 | 11.38 | 12.10 | 1.98 |
| 115.9542 | 30.22  | 17.42 | 15.30 | 16.69 | 15.65 | 1.16 |
| 115.9575 | 270.5  | 21.34 | 18.33 | 18.45 | 18.28 | 1.33 |

|          |        |       |       |       |       |      |
|----------|--------|-------|-------|-------|-------|------|
| 115.9621 | 19.67  | 18.43 | 8.23  | 8.75  | 10.98 | 2.01 |
| 115.9641 | 271.11 | 20.92 | 18.89 | 18.19 | 18.84 | 0.90 |
| 115.9720 | 24.1   | 16.32 | 8.76  | 9.29  | 10.03 | 2.06 |
| 115.9785 | 22.21  | 14.98 | 13.47 | 16.65 | 15.53 | 0.00 |
| 116.0019 | 275.9  | 20.04 | 17.17 | 16.66 | 17.61 | 1.22 |
| 116.0020 | 146.72 | 18.64 | 16.00 | 16.16 | 16.16 | 1.53 |
| 116.0123 | 92.84  | 13.65 | 14.41 | 15.32 | 14.97 | 0.48 |
| 116.0164 | 197.4  | 14.89 | 14.84 | 14.65 | 15.53 | 0.01 |
| 116.0266 | 86.71  | 16.73 | 18.90 | 18.85 | 18.68 | 1.43 |
| 116.0343 | 80.23  | 23.01 | 22.89 | 23.31 | 22.78 | 0.04 |
| 116.0401 | 78.16  | 14.81 | 16.08 | 15.88 | 15.68 | 0.65 |
| 116.0424 | 192.38 | 15.50 | 12.93 | 13.37 | 13.46 | 1.22 |
| 116.0472 | 53.57  | 17.20 | 15.76 | 15.24 | 15.00 | 1.17 |
| 116.0495 | 38.58  | 16.71 | 14.44 | 15.53 | 15.52 | 0.77 |
| 116.0528 | 191.37 | 16.51 | 13.95 | 14.15 | 14.63 | 1.67 |
| 116.0576 | 37.94  | 17.49 | 14.98 | 16.47 | 16.62 | 1.02 |
| 116.0620 | 199.67 | 15.80 | 12.69 | 13.25 | 12.89 | 1.31 |
| 116.0707 | 77.32  | 26.34 | 25.61 | 25.69 | 25.84 | 1.09 |
| 116.0802 | 295.67 | 18.25 | 20.13 | 20.21 | 19.25 | 0.81 |
| 116.0900 | 79.97  | 16.36 | 15.53 | 15.10 | 15.48 | 0.83 |
| 116.1070 | 290.44 | 17.57 | 16.86 | 16.74 | 16.94 | 0.58 |
| 116.1070 | 180.32 | 18.31 | 18.09 | 18.06 | 17.80 | 0.22 |
| 116.4995 | 38.46  | 17.95 | 13.27 | 13.64 | 14.25 | 1.99 |
| 116.5102 | 35.06  | 15.58 | 14.79 | 16.99 | 15.14 | 0.04 |
| 116.5247 | 86.71  | 16.61 | 18.58 | 18.53 | 18.38 | 1.32 |
| 116.5339 | 75.14  | 16.64 | 14.45 | 15.13 | 14.62 | 1.05 |
| 116.5418 | 87.24  | 18.09 | 20.42 | 20.35 | 19.85 | 1.35 |
| 116.5465 | 29.24  | 12.88 | 17.01 | 11.61 | 14.56 | 0.50 |
| 116.8909 | 46.75  | 22.03 | 21.71 | 21.83 | 21.43 | 0.49 |
| 116.9619 | 42.31  | 21.04 | 19.86 | 20.68 | 19.76 | 0.76 |
| 116.9719 | 276.1  | 20.39 | 18.76 | 18.12 | 17.83 | 0.70 |
| 116.9746 | 36.33  | 17.00 | 10.23 | 10.75 | 12.50 | 1.92 |
| 116.9923 | 55.48  | 16.78 | 14.36 | 14.45 | 13.74 | 1.07 |
| 116.9948 | 145.58 | 10.61 | 13.98 | 14.20 | 13.90 | 1.57 |
| 117.0022 | 36.29  | 16.91 | 16.86 | 18.87 | 16.77 | 0.53 |
| 117.0091 | 93.96  | 15.56 | 15.21 | 15.98 | 15.54 | 0.01 |
| 117.0377 | 72.05  | 18.03 | 17.88 | 18.31 | 17.82 | 0.00 |
| 117.0422 | 83.7   | 16.22 | 16.58 | 16.49 | 16.62 | 0.36 |
| 117.0551 | 253.61 | 16.56 | 14.32 | 14.33 | 14.79 | 1.58 |
| 117.0573 | 41.97  | 21.03 | 20.04 | 20.55 | 20.31 | 1.20 |
| 117.0653 | 178.29 | 16.16 | 13.53 | 13.81 | 14.10 | 1.67 |
| 117.0677 | 55.25  | 17.89 | 15.83 | 16.37 | 16.36 | 1.64 |
| 117.0699 | 278.42 | 17.72 | 15.71 | 15.71 | 15.93 | 1.41 |
| 117.0699 | 30.73  | 18.13 | 16.21 | 16.85 | 17.47 | 1.07 |
| 117.0740 | 79.25  | 22.15 | 21.21 | 21.52 | 21.40 | 1.31 |
| 117.0772 | 176.43 | 16.53 | 13.93 | 14.41 | 14.02 | 1.59 |
| 117.1023 | 55.5   | 16.19 | 14.64 | 14.96 | 15.00 | 1.33 |
| 117.1023 | 217.08 | 16.31 | 13.77 | 14.03 | 14.25 | 1.71 |
| 117.5043 | 111.6  | 14.01 | 14.63 | 14.86 | 14.32 | 0.25 |
| 117.5062 | 98.53  | 17.05 | 14.47 | 15.42 | 14.92 | 1.58 |
| 117.5182 | 31.32  | 16.79 | 15.89 | 17.83 | 16.98 | 0.00 |
| 117.5405 | 82.2   | 16.35 | 16.66 | 16.65 | 16.77 | 0.37 |
| 117.9545 | 260.53 | 20.05 | 16.06 | 16.40 | 16.73 | 1.61 |
| 117.9595 | 271.05 | 19.40 | 16.88 | 16.10 | 18.38 | 1.20 |
| 117.9698 | 32.48  | 19.93 | 18.60 | 19.51 | 18.64 | 0.85 |
| 117.9905 | 101.27 | 18.92 | 19.23 | 20.36 | 19.55 | 0.75 |

|          |        |       |       |       |       |      |
|----------|--------|-------|-------|-------|-------|------|
| 118.0161 | 33.38  | 16.98 | 16.14 | 17.70 | 17.26 | 0.07 |
| 118.0350 | 94.37  | 16.16 | 15.65 | 15.99 | 16.04 | 0.26 |
| 118.0389 | 69.85  | 14.89 | 14.26 | 14.24 | 14.41 | 0.31 |
| 118.0500 | 183.37 | 16.64 | 13.74 | 13.97 | 14.90 | 1.64 |
| 118.0543 | 28.95  | 18.70 | 17.95 | 17.86 | 18.06 | 0.42 |
| 118.0612 | 63.52  | 20.94 | 20.52 | 20.67 | 20.17 | 0.53 |
| 118.0652 | 41.79  | 23.52 | 22.56 | 22.95 | 22.84 | 1.24 |
| 118.0685 | 291.38 | 18.80 | 17.40 | 17.76 | 17.64 | 0.78 |
| 118.0753 | 55.93  | 18.01 | 16.27 | 16.81 | 16.73 | 1.50 |
| 118.0863 | 153.16 | 21.42 | 24.12 | 23.42 | 24.58 | 1.22 |
| 118.0958 | 192.44 | 15.54 | 13.28 | 13.57 | 12.20 | 0.90 |
| 118.1226 | 32.24  | 19.62 | 18.63 | 18.87 | 18.64 | 0.79 |
| 118.1227 | 186.12 | 19.62 | 18.79 | 19.41 | 19.20 | 0.16 |
| 118.5122 | 129.62 | 13.84 | 14.33 | 14.78 | 14.14 | 0.23 |
| 118.8890 | 45.71  | 17.17 | 15.76 | 15.88 | 15.84 | 1.72 |
| 118.9205 | 27.81  | 10.90 | 17.14 | 17.11 | 16.53 | 1.85 |
| 118.9205 | 275.9  | 20.77 | 20.98 | 20.94 | 20.61 | 0.16 |
| 118.9674 | 274.3  | 18.66 | 17.31 | 16.42 | 18.47 | 0.57 |
| 118.9839 | 279.13 | 16.89 | 13.92 | 14.46 | 14.54 | 1.14 |
| 118.9922 | 101.37 | 18.15 | 16.10 | 16.02 | 16.39 | 1.14 |
| 118.9961 | 23.5   | 16.91 | 15.93 | 15.44 | 15.72 | 1.05 |
| 119.0011 | 254.91 | 16.75 | 15.49 | 15.54 | 15.88 | 1.13 |
| 119.0011 | 128.59 | 16.94 | 15.11 | 16.53 | 15.66 | 0.84 |
| 119.0175 | 60.6   | 19.74 | 17.80 | 18.26 | 18.31 | 1.06 |
| 119.0353 | 201.14 | 18.65 | 20.82 | 21.43 | 20.09 | 1.29 |
| 119.0492 | 56.94  | 21.14 | 20.27 | 20.74 | 20.23 | 1.06 |
| 119.0614 | 31.07  | 22.36 | 21.90 | 21.85 | 22.10 | 0.54 |
| 119.0645 | 56.19  | 15.25 | 14.32 | 14.48 | 14.29 | 0.46 |
| 119.0686 | 39.54  | 20.01 | 18.78 | 19.22 | 19.14 | 1.47 |
| 119.0718 | 270.13 | 16.58 | 14.65 | 14.79 | 14.69 | 1.03 |
| 119.0729 | 38.93  | 18.02 | 16.34 | 16.65 | 16.87 | 1.67 |
| 119.0834 | 163.93 | 13.63 | 15.04 | 13.72 | 15.19 | 0.34 |
| 119.0855 | 23.81  | 18.40 | 16.33 | 16.96 | 17.61 | 1.43 |
| 119.0855 | 277.27 | 18.65 | 16.26 | 16.39 | 17.08 | 1.18 |
| 119.0856 | 175.22 | 18.26 | 16.92 | 16.95 | 17.38 | 0.96 |
| 119.0897 | 156.1  | 17.45 | 20.32 | 18.28 | 20.76 | 0.80 |
| 119.0925 | 155.93 | 10.85 | 13.59 | 13.37 | 13.51 | 1.03 |
| 119.1261 | 152.16 | 16.63 | 15.48 | 15.67 | 16.25 | 0.93 |
| 119.5151 | 20.45  | 12.64 | 16.62 | 17.09 | 16.46 | 1.75 |
| 119.5195 | 87.1   | 16.69 | 15.82 | 16.17 | 16.02 | 0.54 |
| 119.8949 | 267.07 | 16.43 | 13.39 | 13.89 | 13.42 | 1.08 |
| 119.9249 | 42.26  | 13.07 | 12.90 | 12.68 | 13.44 | 0.10 |
| 119.9504 | 109.18 | 15.82 | 13.54 | 13.39 | 13.46 | 0.77 |
| 119.9877 | 100    | 17.08 | 16.85 | 18.21 | 17.58 | 0.36 |
| 119.9929 | 77.15  | 21.39 | 17.79 | 18.07 | 19.63 | 1.76 |
| 120.0029 | 56.8   | 20.00 | 17.68 | 18.21 | 17.44 | 1.34 |
| 120.0089 | 107.81 | 21.14 | 19.79 | 20.63 | 19.71 | 0.97 |
| 120.0089 | 214.04 | 16.70 | 16.15 | 14.59 | 16.34 | 0.56 |
| 120.0115 | 203.29 | 17.99 | 19.92 | 20.55 | 20.99 | 1.22 |
| 120.0194 | 39.08  | 19.10 | 16.24 | 16.80 | 17.40 | 1.56 |
| 120.0236 | 299.58 | 18.73 | 17.70 | 16.81 | 18.15 | 0.87 |
| 120.0324 | 37.82  | 17.40 | 14.50 | 14.97 | 15.50 | 1.60 |
| 120.0387 | 177.38 | 16.07 | 15.51 | 15.65 | 15.35 | 0.35 |
| 120.0387 | 42.55  | 19.45 | 17.67 | 18.02 | 18.21 | 1.15 |
| 120.0444 | 280.3  | 17.11 | 15.15 | 15.29 | 15.59 | 1.36 |
| 120.0444 | 22.41  | 16.71 | 14.03 | 13.26 | 13.91 | 1.44 |

|          |        |       |       |       |       |      |
|----------|--------|-------|-------|-------|-------|------|
| 120.0525 | 49.59  | 17.46 | 15.36 | 16.00 | 15.90 | 1.56 |
| 120.0557 | 278.52 | 19.32 | 18.32 | 17.93 | 17.56 | 0.85 |
| 120.0606 | 102.97 | 17.21 | 16.81 | 17.51 | 17.48 | 0.04 |
| 120.0656 | 68.19  | 24.80 | 24.27 | 24.55 | 24.38 | 0.85 |
| 120.0808 | 51.75  | 25.94 | 24.88 | 25.28 | 25.30 | 1.44 |
| 120.0904 | 158.96 | 15.85 | 15.17 | 15.33 | 15.99 | 0.35 |
| 120.0930 | 53.69  | 17.05 | 15.24 | 15.90 | 15.87 | 1.08 |
| 120.1020 | 34.83  | 20.61 | 19.52 | 20.12 | 20.38 | 0.65 |
| 120.4945 | 60.57  | 16.91 | 13.40 | 13.48 | 15.66 | 1.26 |
| 120.5014 | 84.98  | 16.74 | 12.14 | 12.62 | 13.85 | 1.76 |
| 120.5106 | 100.79 | 16.96 | 14.65 | 14.98 | 14.90 | 1.65 |
| 120.5191 | 276.19 | 17.04 | 17.04 | 17.25 | 16.31 | 0.02 |
| 120.5230 | 83.4   | 15.17 | 15.77 | 14.45 | 15.61 | 0.04 |
| 120.9453 | 38.14  | 15.24 | 17.46 | 17.13 | 16.84 | 1.56 |
| 120.9535 | 86.29  | 16.10 | 17.87 | 18.34 | 17.56 | 1.22 |
| 120.9657 | 78.37  | 18.45 | 20.47 | 19.54 | 19.94 | 1.39 |
| 120.9809 | 143.53 | 18.58 | 15.10 | 15.47 | 15.79 | 1.46 |
| 120.9884 | 88.13  | 12.22 | 11.25 | 15.36 | 14.02 | 0.27 |
| 120.9908 | 62.25  | 16.87 | 12.17 | 12.61 | 15.51 | 1.33 |
| 120.9931 | 129.45 | 16.12 | 14.06 | 12.83 | 14.29 | 0.97 |
| 121.0120 | 88.53  | 19.14 | 19.69 | 19.47 | 19.02 | 0.23 |
| 121.0148 | 257.32 | 15.94 | 10.21 | 19.72 | 12.58 | 0.30 |
| 121.0207 | 99.99  | 17.77 | 15.45 | 15.11 | 16.04 | 1.22 |
| 121.0255 | 91.64  | 14.42 | 15.75 | 15.90 | 15.44 | 0.76 |
| 121.0284 | 300.2  | 16.31 | 16.56 | 14.63 | 13.07 | 0.27 |
| 121.0285 | 146.28 | 18.94 | 18.99 | 18.77 | 18.64 | 0.08 |
| 121.0397 | 173.31 | 16.37 | 16.66 | 17.16 | 15.81 | 0.24 |
| 121.0397 | 30.27  | 18.28 | 17.53 | 17.49 | 17.88 | 0.83 |
| 121.0648 | 273.58 | 17.73 | 16.17 | 15.65 | 16.39 | 1.29 |
| 121.0689 | 71.2   | 20.46 | 20.12 | 20.30 | 20.15 | 0.49 |
| 121.0761 | 175    | 16.80 | 13.65 | 13.40 | 14.40 | 1.74 |
| 121.0778 | 38.51  | 17.22 | 14.90 | 15.45 | 15.81 | 1.75 |
| 121.0842 | 49.19  | 22.31 | 21.33 | 21.77 | 21.62 | 1.29 |
| 121.0875 | 197.69 | 16.34 | 13.42 | 14.08 | 13.99 | 1.57 |
| 121.1011 | 24.3   | 17.90 | 16.25 | 16.69 | 17.30 | 1.39 |
| 121.1012 | 286.84 | 18.72 | 16.89 | 16.78 | 17.09 | 1.07 |
| 121.1012 | 176.51 | 18.43 | 17.03 | 17.48 | 17.76 | 0.96 |
| 121.5096 | 96.07  | 16.20 | 14.29 | 15.08 | 14.49 | 0.73 |
| 121.5205 | 80.63  | 19.79 | 17.06 | 17.89 | 17.17 | 1.29 |
| 121.5262 | 96.7   | 17.43 | 16.07 | 15.97 | 15.93 | 0.93 |
| 121.5356 | 85.87  | 15.60 | 15.93 | 16.08 | 16.23 | 0.41 |
| 121.5702 | 69.69  | 15.14 | 14.63 | 14.52 | 15.41 | 0.24 |
| 121.9579 | 286    | 20.64 | 18.63 | 18.99 | 18.34 | 1.11 |
| 121.9580 | 125.89 | 18.38 | 15.64 | 15.74 | 16.61 | 1.07 |
| 121.9662 | 22.94  | 21.14 | 19.77 | 20.35 | 20.46 | 1.43 |
| 121.9662 | 182.98 | 19.26 | 21.98 | 21.84 | 21.42 | 0.97 |
| 121.9851 | 90.55  | 13.97 | 14.17 | 16.03 | 15.54 | 0.36 |
| 121.9917 | 33.21  | 16.30 | 13.69 | 13.69 | 15.12 | 1.34 |
| 121.9919 | 266.73 | 15.16 | 9.97  | 9.84  | 12.10 | 1.24 |
| 122.0003 | 125.99 | 16.55 | 16.79 | 17.35 | 17.05 | 0.52 |
| 122.0072 | 191.01 | 11.78 | 13.58 | 13.59 | 14.13 | 0.59 |
| 122.0099 | 100.1  | 14.20 | 14.17 | 14.16 | 14.20 | 0.01 |
| 122.0193 | 300.86 | 19.70 | 19.37 | 18.77 | 19.47 | 0.32 |
| 122.0222 | 90.86  | 16.49 | 13.91 | 15.16 | 13.99 | 0.78 |
| 122.0277 | 84.35  | 21.81 | 20.77 | 21.04 | 20.87 | 0.62 |
| 122.0318 | 209.07 | 16.26 | 13.08 | 13.51 | 13.25 | 1.56 |

|          |        |       |       |       |       |      |
|----------|--------|-------|-------|-------|-------|------|
| 122.0364 | 260.89 | 16.92 | 12.17 | 12.33 | 13.60 | 1.64 |
| 122.0474 | 32.15  | 17.09 | 15.49 | 15.78 | 15.97 | 1.10 |
| 122.0601 | 289.2  | 17.92 | 16.92 | 16.84 | 16.84 | 0.80 |
| 122.0657 | 157.63 | 10.01 | 14.69 | 14.84 | 14.51 | 1.78 |
| 122.0713 | 275.71 | 17.74 | 15.50 | 15.90 | 16.00 | 1.34 |
| 122.0876 | 39.99  | 17.18 | 14.82 | 15.45 | 15.78 | 1.80 |
| 122.0965 | 184.86 | 16.60 | 14.21 | 14.43 | 14.77 | 1.70 |
| 122.1046 | 206.47 | 15.57 | 12.67 | 13.48 | 13.34 | 0.97 |
| 122.5108 | 111.04 | 16.31 | 13.73 | 15.05 | 13.96 | 0.93 |
| 122.5203 | 92.64  | 15.70 | 16.08 | 16.25 | 15.87 | 0.29 |
| 122.5339 | 70.57  | 16.44 | 15.28 | 15.42 | 15.18 | 0.48 |
| 122.5370 | 88.29  | 20.76 | 22.93 | 23.24 | 22.67 | 1.45 |
| 122.5739 | 86.88  | 16.81 | 15.73 | 16.08 | 16.01 | 0.95 |
| 122.9246 | 45.01  | 22.63 | 23.42 | 23.40 | 23.50 | 1.34 |
| 122.9644 | 26.52  | 16.14 | 9.58  | 10.56 | 11.55 | 1.89 |
| 122.9730 | 55.14  | 20.15 | 18.05 | 19.39 | 17.31 | 0.90 |
| 122.9904 | 128.92 | 13.32 | 11.34 | 13.00 | 13.62 | 0.32 |
| 123.0106 | 194.37 | 13.84 | 14.03 | 14.45 | 15.01 | 0.29 |
| 123.0147 | 20.51  | 17.47 | 9.75  | 10.36 | 11.58 | 2.04 |
| 123.0166 | 87.02  | 16.29 | 16.17 | 16.67 | 16.55 | 0.14 |
| 123.0260 | 64.79  | 16.52 | 13.74 | 14.93 | 14.23 | 1.02 |
| 123.0391 | 89.65  | 21.82 | 22.92 | 23.09 | 22.83 | 0.93 |
| 123.0441 | 55.01  | 21.63 | 20.77 | 21.24 | 20.74 | 0.99 |
| 123.0553 | 40.75  | 29.41 | 28.45 | 28.37 | 28.77 | 1.51 |
| 123.0660 | 232.56 | 16.80 | 15.61 | 13.65 | 15.37 | 0.73 |
| 123.0803 | 284.54 | 18.36 | 17.58 | 17.37 | 17.60 | 0.51 |
| 123.0845 | 292.74 | 17.59 | 17.63 | 17.29 | 17.87 | 0.03 |
| 123.0917 | 172.57 | 17.05 | 15.46 | 16.28 | 15.72 | 1.06 |
| 123.1168 | 24.34  | 17.88 | 16.62 | 16.99 | 17.63 | 1.19 |
| 123.1168 | 277.43 | 19.19 | 16.57 | 16.19 | 17.36 | 1.24 |
| 123.1169 | 173.86 | 18.35 | 17.35 | 17.79 | 17.74 | 0.67 |
| 123.4836 | 270.54 | 16.37 | 9.35  | 9.77  | 11.27 | 1.58 |
| 123.4878 | 88.35  | 15.07 | 15.49 | 15.54 | 15.09 | 0.35 |
| 123.5149 | 85.34  | 19.85 | 20.59 | 20.58 | 19.96 | 0.37 |
| 123.5219 | 195.88 | 13.89 | 14.24 | 14.32 | 15.00 | 0.22 |
| 123.5281 | 93.69  | 16.75 | 17.68 | 18.56 | 17.30 | 0.76 |
| 123.5358 | 85.34  | 17.88 | 19.91 | 20.36 | 19.78 | 1.51 |
| 123.5391 | 86.9   | 15.45 | 16.43 | 17.03 | 16.63 | 0.95 |
| 123.5491 | 70.2   | 16.10 | 14.35 | 15.62 | 14.69 | 0.70 |
| 123.5676 | 119.86 | 16.69 | 16.24 | 17.16 | 16.57 | 0.06 |
| 123.5943 | 60.57  | 20.46 | 21.74 | 21.87 | 21.31 | 1.12 |
| 123.9279 | 45.06  | 16.45 | 15.39 | 15.41 | 15.98 | 1.03 |
| 123.9548 | 280.7  | 19.67 | 17.04 | 17.79 | 17.32 | 1.20 |
| 123.9643 | 22.55  | 20.00 | 18.45 | 19.00 | 19.12 | 1.53 |
| 123.9982 | 137.03 | 16.35 | 14.39 | 14.14 | 14.41 | 1.24 |
| 124.0156 | 267.22 | 19.91 | 21.75 | 21.72 | 20.69 | 1.53 |
| 124.0243 | 82.41  | 18.21 | 18.78 | 18.83 | 18.89 | 0.82 |
| 124.0289 | 99.58  | 17.88 | 15.99 | 15.96 | 16.19 | 1.39 |
| 124.0338 | 24.95  | 16.04 | 14.69 | 14.43 | 15.52 | 0.94 |
| 124.0395 | 274.63 | 20.24 | 18.86 | 18.57 | 18.61 | 0.74 |
| 124.0438 | 95.53  | 17.32 | 17.41 | 17.93 | 17.68 | 0.30 |
| 124.0474 | 49.82  | 17.96 | 15.84 | 16.52 | 16.24 | 1.63 |
| 124.0523 | 46.3   | 21.74 | 21.32 | 21.47 | 21.41 | 0.71 |
| 124.0585 | 37.3   | 25.23 | 24.60 | 24.66 | 24.84 | 1.03 |
| 124.0757 | 291    | 17.26 | 16.05 | 15.94 | 15.90 | 1.02 |
| 124.0870 | 57.93  | 21.27 | 18.93 | 18.84 | 18.78 | 1.73 |

|          |        |       |       |       |       |      |
|----------|--------|-------|-------|-------|-------|------|
| 124.0960 | 61.83  | 17.45 | 18.40 | 18.61 | 18.01 | 1.21 |
| 124.1121 | 196.13 | 16.02 | 13.75 | 13.74 | 14.13 | 1.59 |
| 124.1202 | 194.92 | 16.08 | 12.75 | 13.12 | 13.55 | 1.29 |
| 124.5126 | 111.04 | 17.17 | 15.46 | 15.15 | 15.16 | 1.10 |
| 124.5269 | 97     | 13.69 | 14.29 | 15.36 | 14.32 | 0.50 |
| 124.5305 | 254.73 | 18.54 | 16.33 | 16.27 | 16.56 | 1.40 |
| 124.5308 | 82.56  | 20.20 | 21.19 | 21.21 | 20.84 | 0.61 |
| 124.5387 | 89.96  | 15.79 | 15.24 | 15.57 | 15.69 | 0.28 |
| 124.9227 | 45.18  | 19.97 | 20.60 | 20.65 | 20.64 | 1.09 |
| 124.9288 | 44.66  | 14.45 | 13.61 | 13.99 | 14.03 | 0.38 |
| 124.9376 | 101.33 | 13.42 | 14.67 | 12.14 | 14.73 | 0.12 |
| 124.9562 | 268.92 | 17.51 | 13.09 | 14.90 | 14.27 | 1.24 |
| 124.9711 | 56.48  | 16.33 | 12.25 | 13.77 | 12.32 | 1.13 |
| 124.9911 | 65.05  | 15.83 | 14.85 | 16.30 | 16.42 | 0.06 |
| 124.9998 | 278.21 | 15.78 | 18.95 | 15.57 | 17.31 | 0.50 |
| 124.9999 | 91.64  | 22.00 | 22.53 | 22.74 | 22.19 | 0.82 |
| 125.0209 | 52.9   | 18.96 | 17.58 | 18.71 | 17.64 | 0.89 |
| 125.0235 | 175.3  | 17.42 | 14.53 | 14.61 | 15.35 | 1.66 |
| 125.0318 | 85.02  | 16.47 | 17.16 | 16.86 | 16.86 | 0.37 |
| 125.0380 | 97.16  | 19.56 | 19.78 | 20.23 | 19.98 | 0.40 |
| 125.0451 | 92.05  | 16.57 | 18.20 | 17.99 | 18.05 | 0.99 |
| 125.0556 | 32.05  | 17.43 | 16.11 | 16.31 | 16.50 | 1.66 |
| 125.0595 | 31.29  | 19.95 | 19.23 | 19.43 | 19.38 | 1.14 |
| 125.0619 | 31.46  | 19.69 | 18.98 | 19.13 | 19.13 | 1.18 |
| 125.0709 | 289.52 | 21.20 | 20.46 | 20.12 | 21.02 | 0.39 |
| 125.0903 | 48.19  | 16.99 | 15.19 | 14.76 | 16.71 | 0.40 |
| 125.0961 | 22.18  | 18.14 | 15.91 | 16.27 | 16.57 | 1.61 |
| 125.0961 | 283.9  | 19.29 | 17.37 | 17.31 | 17.57 | 1.25 |
| 125.1073 | 22.66  | 18.23 | 16.98 | 16.86 | 16.83 | 0.88 |
| 125.1074 | 174.82 | 16.79 | 14.65 | 15.17 | 15.12 | 1.48 |
| 125.1325 | 21.69  | 16.52 | 12.46 | 13.16 | 14.12 | 1.73 |
| 125.1325 | 173.07 | 17.28 | 14.30 | 14.80 | 15.36 | 1.72 |
| 125.4931 | 254.5  | 16.05 | 15.19 | 15.61 | 15.75 | 0.42 |
| 125.4931 | 133.63 | 17.06 | 16.43 | 17.18 | 16.87 | 0.19 |
| 125.5056 | 19.93  | 18.10 | 12.79 | 13.41 | 13.84 | 1.81 |
| 125.5111 | 116.05 | 14.72 | 14.40 | 13.40 | 13.70 | 0.24 |
| 125.5161 | 39.75  | 16.31 | 14.43 | 15.64 | 15.09 | 0.58 |
| 125.5294 | 67.78  | 15.82 | 17.01 | 17.34 | 17.29 | 1.00 |
| 125.5471 | 85.19  | 19.79 | 22.72 | 22.64 | 22.10 | 1.50 |
| 125.9536 | 283.65 | 18.97 | 16.56 | 17.12 | 16.46 | 1.23 |
| 125.9642 | 272.25 | 19.54 | 14.77 | 14.66 | 16.21 | 1.73 |
| 125.9863 | 273.41 | 25.54 | 23.91 | 24.07 | 24.33 | 1.04 |
| 125.9863 | 120.16 | 24.88 | 22.91 | 23.30 | 23.07 | 1.33 |
| 125.9863 | 29.07  | 24.10 | 25.36 | 25.26 | 25.39 | 1.33 |
| 126.0041 | 32.17  | 14.36 | 13.17 | 12.53 | 13.19 | 0.88 |
| 126.0074 | 36.43  | 16.68 | 16.67 | 18.77 | 16.46 | 0.40 |
| 126.0220 | 78.1   | 27.33 | 27.18 | 27.11 | 27.48 | 0.16 |
| 126.0256 | 41.16  | 16.49 | 14.20 | 15.22 | 13.85 | 0.61 |
| 126.0307 | 77.07  | 17.74 | 19.76 | 19.68 | 19.42 | 1.33 |
| 126.0436 | 83.32  | 15.94 | 15.20 | 15.10 | 15.70 | 0.45 |
| 126.0474 | 88.09  | 17.51 | 19.50 | 19.43 | 19.16 | 1.33 |
| 126.0549 | 283.39 | 21.02 | 19.70 | 19.92 | 20.18 | 0.52 |
| 126.0663 | 182.84 | 17.00 | 14.33 | 14.34 | 14.76 | 1.73 |
| 126.0743 | 283.55 | 17.77 | 15.11 | 14.82 | 15.49 | 1.54 |
| 126.0744 | 170.31 | 18.40 | 14.51 | 14.26 | 15.86 | 1.80 |
| 126.0913 | 290.8  | 17.10 | 15.73 | 15.92 | 15.70 | 1.17 |

|          |        |       |       |       |       |      |
|----------|--------|-------|-------|-------|-------|------|
| 126.0995 | 198.09 | 15.25 | 10.80 | 11.90 | 12.68 | 1.06 |
| 126.1026 | 53.7   | 21.46 | 21.51 | 21.35 | 21.40 | 0.02 |
| 126.1278 | 23.36  | 15.47 | 12.42 | 12.34 | 13.11 | 1.39 |
| 126.5009 | 250.92 | 15.95 | 15.23 | 15.25 | 15.42 | 0.51 |
| 126.5009 | 134.69 | 17.56 | 16.75 | 17.40 | 16.62 | 0.52 |
| 126.5096 | 115.62 | 14.24 | 14.58 | 14.79 | 14.31 | 0.15 |
| 126.5271 | 95.77  | 15.93 | 14.48 | 14.26 | 14.67 | 0.62 |
| 126.5458 | 88.91  | 17.75 | 19.61 | 19.51 | 18.78 | 0.90 |
| 126.5492 | 83.73  | 15.55 | 16.37 | 16.27 | 15.71 | 0.42 |
| 126.5946 | 93.32  | 16.29 | 17.37 | 17.58 | 17.31 | 0.86 |
| 126.9208 | 44.74  | 16.06 | 13.92 | 14.21 | 14.60 | 1.28 |
| 126.9554 | 287.19 | 19.32 | 14.92 | 14.87 | 16.71 | 1.58 |
| 126.9630 | 111.99 | 10.08 | 13.76 | 13.71 | 13.30 | 1.41 |
| 126.9675 | 134.4  | 17.13 | 11.77 | 10.88 | 13.88 | 1.65 |
| 126.9720 | 297.38 | 19.85 | 16.34 | 15.72 | 16.93 | 1.54 |
| 126.9833 | 265.14 | 16.51 | 10.96 | 11.20 | 12.04 | 1.48 |
| 126.9896 | 270.92 | 20.11 | 17.23 | 17.56 | 18.00 | 1.55 |
| 127.0155 | 121    | 16.76 | 14.82 | 13.22 | 14.52 | 0.74 |
| 127.0204 | 77.53  | 19.85 | 20.25 | 20.14 | 20.20 | 0.34 |
| 127.0261 | 78.56  | 21.25 | 21.71 | 21.63 | 21.60 | 0.40 |
| 127.0326 | 153.58 | 13.96 | 16.05 | 14.33 | 16.21 | 0.54 |
| 127.0389 | 283.21 | 23.15 | 23.97 | 23.87 | 24.08 | 0.46 |
| 127.0502 | 287.9  | 17.18 | 16.23 | 16.21 | 16.26 | 0.83 |
| 127.0583 | 238.39 | 18.43 | 15.62 | 15.69 | 16.07 | 1.70 |
| 127.0727 | 141.42 | 17.80 | 16.21 | 14.51 | 16.97 | 0.84 |
| 127.0727 | 20.57  | 16.31 | 14.92 | 13.83 | 15.00 | 1.30 |
| 127.0754 | 289.44 | 17.70 | 16.40 | 16.33 | 16.50 | 1.11 |
| 127.0754 | 156.02 | 18.22 | 16.94 | 17.10 | 17.42 | 1.05 |
| 127.0866 | 162.62 | 17.06 | 15.08 | 15.95 | 15.63 | 1.23 |
| 127.1060 | 57.2   | 17.48 | 16.48 | 16.49 | 16.67 | 0.75 |
| 127.1118 | 285.93 | 16.86 | 15.36 | 15.10 | 15.62 | 1.25 |
| 127.1118 | 20.66  | 16.74 | 12.96 | 13.52 | 14.14 | 1.84 |
| 127.1118 | 152.34 | 17.54 | 15.17 | 15.81 | 16.26 | 1.35 |
| 127.1230 | 19.84  | 15.99 | 12.74 | 12.32 | 13.01 | 1.42 |
| 127.5087 | 96.94  | 17.87 | 14.67 | 14.27 | 15.33 | 1.48 |
| 127.5244 | 31.9   | 15.57 | 10.42 | 11.01 | 11.65 | 1.96 |
| 127.9666 | 29.84  | 19.77 | 12.13 | 13.05 | 14.70 | 2.03 |
| 127.9748 | 86.81  | 13.72 | 15.89 | 16.09 | 16.08 | 1.06 |
| 127.9794 | 21.46  | 16.07 | 7.95  | 8.35  | 9.54  | 2.02 |
| 127.9823 | 127.8  | 17.41 | 12.94 | 14.34 | 13.99 | 1.66 |
| 127.9905 | 265.73 | 16.84 | 11.87 | 11.42 | 13.18 | 1.46 |
| 128.0183 | 80.53  | 22.78 | 22.91 | 23.18 | 23.33 | 0.31 |
| 128.0231 | 94.1   | 20.41 | 18.49 | 19.03 | 18.47 | 1.37 |
| 128.0262 | 78.72  | 19.49 | 19.43 | 19.46 | 19.38 | 0.06 |
| 128.0287 | 82.95  | 15.70 | 15.70 | 15.41 | 15.87 | 0.07 |
| 128.0352 | 224.73 | 13.77 | 11.30 | 11.62 | 10.93 | 0.53 |
| 128.0423 | 278.32 | 19.49 | 19.66 | 19.51 | 19.64 | 0.08 |
| 128.0455 | 220.87 | 16.71 | 15.24 | 14.93 | 15.11 | 1.32 |
| 128.0455 | 34.15  | 17.52 | 14.62 | 15.07 | 15.80 | 1.41 |
| 128.0497 | 70.33  | 16.33 | 17.10 | 16.97 | 16.78 | 0.61 |
| 128.0620 | 286.6  | 18.07 | 16.36 | 16.61 | 16.63 | 1.10 |
| 128.0706 | 279.19 | 20.99 | 20.09 | 21.01 | 19.85 | 0.34 |
| 128.0763 | 67.47  | 16.22 | 15.13 | 15.17 | 15.72 | 0.44 |
| 128.0801 | 286.93 | 16.42 | 14.94 | 15.43 | 14.51 | 0.88 |
| 128.1070 | 275.08 | 19.16 | 17.47 | 16.64 | 17.55 | 0.95 |
| 128.1434 | 20.1   | 13.32 | 12.44 | 12.18 | 12.88 | 0.49 |



|          |        |       |       |       |       |      |
|----------|--------|-------|-------|-------|-------|------|
| 128.5027 | 27.43  | 14.38 | 14.87 | 16.79 | 15.88 | 0.72 |
| 128.5103 | 56.46  | 19.52 | 19.92 | 21.43 | 19.64 | 0.81 |
| 128.5206 | 48.25  | 16.08 | 14.63 | 16.54 | 15.80 | 0.38 |
| 128.5248 | 84.72  | 16.89 | 15.78 | 15.66 | 15.98 | 0.77 |
| 128.9508 | 275.31 | 24.25 | 20.72 | 20.49 | 22.16 | 1.43 |
| 128.9509 | 54.95  | 23.98 | 19.50 | 19.70 | 21.76 | 1.88 |
| 128.9981 | 61.03  | 18.22 | 15.54 | 16.15 | 16.30 | 0.96 |
| 129.0090 | 71.81  | 15.61 | 13.60 | 15.97 | 14.25 | 0.40 |
| 129.0118 | 36.32  | 15.71 | 15.66 | 17.51 | 15.61 | 0.37 |
| 129.0188 | 267.26 | 16.41 | 14.84 | 14.91 | 15.36 | 1.39 |
| 129.0283 | 58.99  | 15.23 | 14.06 | 14.41 | 14.57 | 0.57 |
| 129.0433 | 288.66 | 15.75 | 14.37 | 14.64 | 15.04 | 0.64 |
| 129.0434 | 196.8  | 16.45 | 13.73 | 14.04 | 14.20 | 1.67 |
| 129.0546 | 287.84 | 19.07 | 18.42 | 18.41 | 18.00 | 0.39 |
| 129.0660 | 264.55 | 18.63 | 17.75 | 17.13 | 17.83 | 1.04 |
| 129.0698 | 24.18  | 17.08 | 14.54 | 15.27 | 16.34 | 1.47 |
| 129.0699 | 284.07 | 17.14 | 15.67 | 15.90 | 15.79 | 1.17 |
| 129.0745 | 169.28 | 16.94 | 14.44 | 14.40 | 15.02 | 1.61 |
| 129.0916 | 178.87 | 17.06 | 14.26 | 14.05 | 15.27 | 1.53 |
| 129.1023 | 213.17 | 17.15 | 15.35 | 16.16 | 15.87 | 1.23 |
| 129.1024 | 70.25  | 19.18 | 19.80 | 19.95 | 19.86 | 0.70 |
| 129.1386 | 273.34 | 18.66 | 20.74 | 19.98 | 20.01 | 1.02 |
| 129.1387 | 83.57  | 16.67 | 21.03 | 18.50 | 20.55 | 1.02 |
| 129.5067 | 82.34  | 17.27 | 13.28 | 13.17 | 15.92 | 1.35 |
| 129.5243 | 260.11 | 18.25 | 18.37 | 19.05 | 17.51 | 0.20 |
| 129.5361 | 30.21  | 15.60 | 17.44 | 18.56 | 17.91 | 1.37 |
| 129.5762 | 74.14  | 15.56 | 15.95 | 16.08 | 16.43 | 0.34 |
| 129.5818 | 86.58  | 16.25 | 15.60 | 16.31 | 16.35 | 0.20 |
| 129.5944 | 61.76  | 17.32 | 18.04 | 18.40 | 17.66 | 1.03 |
| 129.9345 | 106.26 | 17.65 | 12.48 | 12.20 | 14.86 | 1.64 |
| 129.9513 | 32.11  | 19.47 | 11.70 | 12.31 | 14.42 | 2.00 |
| 129.9542 | 19.58  | 19.53 | 11.13 | 11.43 | 14.05 | 1.97 |
| 129.9542 | 135.93 | 17.31 | 8.90  | 8.80  | 12.91 | 1.74 |
| 129.9586 | 19.45  | 17.99 | 11.11 | 11.66 | 12.79 | 2.01 |
| 129.9791 | 273.89 | 20.13 | 16.76 | 17.06 | 17.67 | 1.68 |
| 129.9792 | 127.38 | 19.70 | 15.95 | 16.63 | 16.82 | 1.87 |
| 130.0079 | 300.3  | 16.33 | 15.26 | 14.27 | 15.72 | 0.86 |
| 130.0169 | 90.76  | 17.82 | 18.44 | 19.03 | 18.86 | 0.76 |
| 130.0320 | 62.64  | 16.37 | 15.79 | 15.98 | 16.22 | 0.41 |
| 130.0500 | 69.75  | 28.73 | 28.60 | 28.43 | 28.51 | 0.49 |
| 130.0500 | 178.19 | 23.85 | 24.66 | 22.52 | 25.09 | 0.04 |
| 130.0594 | 285.19 | 19.80 | 19.12 | 19.22 | 18.68 | 0.40 |
| 130.0651 | 288.56 | 17.61 | 16.41 | 16.34 | 16.36 | 1.21 |
| 130.0861 | 66.18  | 23.82 | 24.29 | 24.37 | 24.17 | 0.54 |
| 130.0993 | 78.53  | 19.45 | 20.95 | 21.11 | 20.14 | 1.06 |
| 130.1055 | 78.96  | 16.19 | 15.08 | 15.62 | 14.76 | 0.57 |
| 130.1227 | 149.61 | 17.08 | 15.42 | 15.76 | 16.06 | 1.32 |
| 130.1420 | 35.03  | 15.19 | 14.47 | 12.66 | 15.98 | 0.52 |
| 130.1590 | 23.38  | 18.41 | 18.57 | 18.24 | 18.46 | 0.02 |
| 130.1591 | 165.36 | 18.23 | 17.37 | 17.74 | 17.77 | 0.77 |
| 130.4822 | 89.18  | 15.44 | 17.33 | 17.98 | 16.90 | 1.14 |
| 130.5032 | 63.29  | 17.44 | 11.49 | 12.34 | 15.60 | 1.39 |
| 130.5067 | 55.96  | 15.48 | 13.02 | 15.25 | 13.14 | 0.57 |
| 130.5258 | 95.72  | 23.51 | 20.63 | 21.68 | 21.21 | 1.36 |
| 130.5314 | 98.83  | 16.49 | 13.90 | 14.62 | 14.66 | 1.03 |
| 130.5386 | 194.3  | 14.82 | 15.30 | 15.81 | 16.16 | 0.39 |

|          |        |       |       |       |       |      |
|----------|--------|-------|-------|-------|-------|------|
| 130.5409 | 81.83  | 15.65 | 15.26 | 15.69 | 15.50 | 0.16 |
| 130.9329 | 27.33  | 18.28 | 18.67 | 19.60 | 18.80 | 0.75 |
| 130.9492 | 21.52  | 16.52 | 10.18 | 10.80 | 11.70 | 2.00 |
| 130.9582 | 276.13 | 19.11 | 16.99 | 17.29 | 16.96 | 1.27 |
| 130.9664 | 285.88 | 22.51 | 18.11 | 17.63 | 19.90 | 1.67 |
| 130.9774 | 48.13  | 17.54 | 17.14 | 17.27 | 16.90 | 0.68 |
| 130.9890 | 265.98 | 18.96 | 15.78 | 15.79 | 16.80 | 1.42 |
| 130.9890 | 160.72 | 18.11 | 14.92 | 15.30 | 15.90 | 1.69 |
| 130.9971 | 106.16 | 15.50 | 14.56 | 13.70 | 14.47 | 0.58 |
| 130.9992 | 194.01 | 15.91 | 9.73  | 12.03 | 10.67 | 1.42 |
| 131.0016 | 42.34  | 18.99 | 19.25 | 18.75 | 19.51 | 0.09 |
| 131.0017 | 112.7  | 19.33 | 14.01 | 15.56 | 15.36 | 1.85 |
| 131.0162 | 43.8   | 15.45 | 16.44 | 16.05 | 16.71 | 0.54 |
| 131.0227 | 29.54  | 13.69 | 16.64 | 16.41 | 16.17 | 1.50 |
| 131.0275 | 91.83  | 20.01 | 18.05 | 18.25 | 18.10 | 1.52 |
| 131.0339 | 74.14  | 20.77 | 20.75 | 20.97 | 20.50 | 0.03 |
| 131.0431 | 178.7  | 16.55 | 13.99 | 14.06 | 14.63 | 1.48 |
| 131.0481 | 63.25  | 21.73 | 21.29 | 21.59 | 21.34 | 0.71 |
| 131.0533 | 155.19 | 19.13 | 19.81 | 17.63 | 20.86 | 0.01 |
| 131.0561 | 67.08  | 18.19 | 16.74 | 17.22 | 16.58 | 0.76 |
| 131.0637 | 28.41  | 17.09 | 15.92 | 11.44 | 17.41 | 0.86 |
| 131.0717 | 284.67 | 17.60 | 16.30 | 16.47 | 15.73 | 0.91 |
| 131.0722 | 24.27  | 16.68 | 12.86 | 13.82 | 13.66 | 1.85 |
| 131.0833 | 79.59  | 23.83 | 25.22 | 25.12 | 24.73 | 1.22 |
| 131.0855 | 23.8   | 17.65 | 12.32 | 12.84 | 13.93 | 1.91 |
| 131.0856 | 173.69 | 17.86 | 12.52 | 13.02 | 13.77 | 1.97 |
| 131.0896 | 74.84  | 19.51 | 20.03 | 20.27 | 20.03 | 0.67 |
| 131.0902 | 222.39 | 16.99 | 14.80 | 15.48 | 15.44 | 0.98 |
| 131.1026 | 76.09  | 15.84 | 15.91 | 16.01 | 15.72 | 0.09 |
| 131.1179 | 287.56 | 19.05 | 17.83 | 17.59 | 17.77 | 0.77 |
| 131.1624 | 23.59  | 14.74 | 13.08 | 13.09 | 13.75 | 0.55 |
| 131.4766 | 105.06 | 17.11 | 19.66 | 19.05 | 18.28 | 1.15 |
| 131.4901 | 93.88  | 15.01 | 15.01 | 15.75 | 14.58 | 0.17 |
| 131.5009 | 78.05  | 21.47 | 17.51 | 17.64 | 19.42 | 1.78 |
| 131.5169 | 121.6  | 20.11 | 18.28 | 19.09 | 18.55 | 1.23 |
| 131.5208 | 104.63 | 17.38 | 12.61 | 14.26 | 13.25 | 1.35 |
| 131.5238 | 89.25  | 16.78 | 12.27 | 13.24 | 13.22 | 1.17 |
| 131.5280 | 90.2   | 17.20 | 14.35 | 14.81 | 15.16 | 1.27 |
| 131.5336 | 267.16 | 16.54 | 12.28 | 13.06 | 12.83 | 1.34 |
| 131.5423 | 87.79  | 20.88 | 23.42 | 23.72 | 23.06 | 1.52 |
| 131.5736 | 90.24  | 15.77 | 16.71 | 16.95 | 16.64 | 0.63 |
| 131.9298 | 266.64 | 21.40 | 16.14 | 15.62 | 17.75 | 1.84 |
| 131.9618 | 257.91 | 16.63 | 15.06 | 14.95 | 15.17 | 1.37 |
| 131.9742 | 287.37 | 20.49 | 17.81 | 17.29 | 18.30 | 1.37 |
| 131.9962 | 86.03  | 17.36 | 17.37 | 14.80 | 14.86 | 0.52 |
| 132.0036 | 302.27 | 20.71 | 20.39 | 19.76 | 20.64 | 0.36 |
| 132.0121 | 41.54  | 13.49 | 16.50 | 17.62 | 14.74 | 1.09 |
| 132.0203 | 48.29  | 17.08 | 17.65 | 17.17 | 17.43 | 0.30 |
| 132.0271 | 263.04 | 18.69 | 18.26 | 18.75 | 17.88 | 0.22 |
| 132.0371 | 63.6   | 15.85 | 15.09 | 15.02 | 14.85 | 0.72 |
| 132.0558 | 278.38 | 20.80 | 21.08 | 20.49 | 19.37 | 0.09 |
| 132.0767 | 69.68  | 28.93 | 28.22 | 28.34 | 28.41 | 1.30 |
| 132.0810 | 38.4   | 19.75 | 18.65 | 19.36 | 19.16 | 0.96 |
| 132.0834 | 193.86 | 15.42 | 10.47 | 12.78 | 10.21 | 1.12 |
| 132.0866 | 78.65  | 19.70 | 21.26 | 21.22 | 20.62 | 1.25 |
| 132.0968 | 55.77  | 17.80 | 15.71 | 15.34 | 16.60 | 0.99 |

|          |        |       |       |       |       |      |
|----------|--------|-------|-------|-------|-------|------|
| 132.1019 | 111.26 | 22.88 | 22.09 | 21.03 | 22.00 | 0.75 |
| 132.1320 | 56.17  | 16.37 | 14.78 | 14.65 | 15.22 | 0.88 |
| 132.4931 | 88.07  | 15.73 | 19.45 | 19.84 | 18.27 | 1.70 |
| 132.5010 | 119.37 | 16.77 | 14.58 | 14.38 | 15.85 | 1.04 |
| 132.5167 | 63.3   | 17.55 | 13.23 | 13.61 | 14.97 | 1.30 |
| 132.5199 | 100.99 | 18.13 | 18.26 | 17.19 | 17.86 | 0.21 |
| 132.5222 | 90.82  | 17.93 | 15.52 | 15.51 | 16.02 | 1.56 |
| 132.5288 | 97.85  | 19.63 | 15.26 | 16.72 | 15.90 | 1.71 |
| 132.5329 | 84.28  | 16.97 | 16.20 | 16.83 | 16.62 | 0.39 |
| 132.5411 | 86.34  | 18.09 | 20.48 | 20.89 | 20.21 | 1.56 |
| 132.5443 | 86.77  | 16.36 | 17.41 | 17.89 | 17.47 | 1.13 |
| 132.8896 | 104.39 | 14.42 | 13.69 | 12.47 | 13.80 | 0.34 |
| 132.9027 | 277.97 | 18.84 | 15.63 | 16.37 | 16.09 | 1.57 |
| 132.9292 | 261.63 | 17.03 | 7.15  | 7.37  | 10.23 | 1.78 |
| 132.9332 | 104.13 | 15.76 | 9.87  | 9.14  | 13.60 | 1.39 |
| 132.9552 | 277.91 | 18.04 | 15.84 | 16.09 | 15.71 | 1.03 |
| 132.9660 | 21.82  | 15.05 | 13.15 | 13.43 | 13.75 | 1.13 |
| 132.9695 | 37.35  | 18.77 | 10.69 | 10.77 | 14.50 | 1.88 |
| 132.9872 | 49.19  | 16.82 | 14.99 | 16.95 | 16.67 | 0.57 |
| 132.9935 | 87.4   | 12.85 | 15.94 | 16.11 | 14.54 | 1.13 |
| 133.0010 | 81.3   | 17.63 | 15.14 | 15.00 | 14.68 | 1.09 |
| 133.0069 | 297.64 | 15.89 | 12.97 | 12.47 | 14.27 | 1.35 |
| 133.0147 | 30.54  | 15.80 | 18.02 | 18.52 | 15.45 | 0.91 |
| 133.0288 | 107.01 | 16.72 | 12.24 | 12.74 | 12.82 | 1.41 |
| 133.0318 | 57.97  | 23.81 | 22.27 | 22.98 | 22.66 | 1.58 |
| 133.0341 | 88.81  | 18.98 | 19.45 | 19.13 | 18.83 | 0.11 |
| 133.0436 | 90.74  | 19.74 | 22.56 | 22.55 | 21.73 | 1.43 |
| 133.0497 | 238.81 | 16.71 | 14.95 | 15.89 | 15.22 | 1.11 |
| 133.0648 | 20.3   | 16.74 | 15.98 | 16.60 | 15.33 | 0.45 |
| 133.0688 | 266.07 | 22.88 | 21.10 | 21.02 | 21.33 | 0.68 |
| 133.0737 | 68.28  | 22.03 | 21.72 | 22.04 | 21.77 | 0.42 |
| 133.0760 | 174.88 | 16.65 | 14.58 | 14.61 | 14.96 | 1.26 |
| 133.0799 | 68.07  | 24.27 | 23.83 | 24.10 | 23.92 | 0.72 |
| 133.0835 | 49.3   | 17.62 | 18.03 | 18.38 | 17.62 | 0.36 |
| 133.0873 | 296.91 | 16.12 | 15.69 | 15.76 | 14.60 | 0.35 |
| 133.0900 | 74.36  | 14.67 | 14.94 | 14.92 | 14.54 | 0.14 |
| 133.0980 | 63.43  | 21.16 | 21.91 | 21.42 | 21.47 | 0.48 |
| 133.1012 | 273.08 | 19.02 | 16.20 | 16.34 | 17.08 | 1.25 |
| 133.1053 | 51.27  | 23.60 | 22.66 | 22.80 | 22.61 | 1.45 |
| 133.1081 | 39.48  | 18.14 | 17.08 | 17.38 | 17.10 | 1.10 |
| 133.4919 | 88.82  | 15.69 | 15.99 | 16.22 | 15.80 | 0.33 |
| 133.4996 | 30.82  | 16.61 | 12.81 | 13.10 | 13.93 | 1.40 |
| 133.5135 | 104.03 | 16.01 | 14.78 | 15.03 | 14.82 | 0.75 |
| 133.5204 | 28.13  | 15.32 | 13.60 | 16.52 | 16.82 | 0.06 |
| 133.5358 | 247.27 | 19.93 | 16.40 | 16.51 | 17.45 | 1.66 |
| 133.5358 | 86.01  | 23.14 | 22.98 | 23.41 | 22.77 | 0.01 |
| 133.5444 | 88.81  | 16.10 | 19.70 | 19.67 | 18.69 | 1.36 |
| 133.5612 | 47.68  | 17.79 | 15.67 | 16.12 | 16.30 | 1.29 |
| 133.9269 | 99.48  | 20.48 | 16.50 | 16.12 | 18.08 | 1.68 |
| 133.9302 | 115.82 | 17.92 | 13.86 | 14.43 | 16.08 | 1.64 |
| 133.9680 | 256.69 | 20.51 | 17.11 | 15.82 | 17.05 | 1.09 |
| 133.9743 | 264.66 | 19.73 | 16.33 | 15.64 | 17.61 | 1.61 |
| 133.9887 | 30.43  | 11.71 | 11.78 | 17.36 | 16.58 | 0.73 |
| 134.0187 | 54.58  | 20.60 | 18.20 | 18.85 | 18.13 | 1.37 |
| 134.0235 | 108.63 | 18.01 | 14.97 | 15.29 | 15.18 | 1.50 |
| 134.0259 | 75.95  | 19.57 | 17.49 | 18.58 | 18.84 | 1.15 |

|          |        |       |       |       |       |      |
|----------|--------|-------|-------|-------|-------|------|
| 134.0271 | 148.49 | 16.99 | 16.52 | 16.18 | 17.03 | 0.48 |
| 134.0356 | 66.25  | 19.67 | 17.74 | 18.55 | 18.07 | 1.55 |
| 134.0448 | 81.85  | 26.04 | 25.72 | 26.21 | 25.70 | 0.22 |
| 134.0506 | 79.11  | 15.91 | 15.88 | 15.48 | 14.84 | 0.17 |
| 134.0578 | 71.41  | 17.07 | 14.63 | 15.28 | 15.53 | 1.35 |
| 134.0600 | 278.55 | 18.87 | 16.98 | 16.39 | 17.06 | 1.12 |
| 134.0638 | 71.74  | 19.46 | 19.16 | 19.32 | 19.17 | 0.39 |
| 134.0705 | 278.28 | 16.63 | 14.70 | 14.73 | 14.75 | 0.77 |
| 134.0769 | 55.95  | 16.84 | 15.48 | 15.79 | 16.10 | 1.51 |
| 134.0811 | 275.35 | 22.97 | 20.91 | 20.48 | 21.40 | 0.90 |
| 134.0907 | 293.01 | 17.26 | 19.86 | 20.40 | 19.03 | 0.99 |
| 134.0964 | 191.22 | 16.44 | 13.49 | 13.56 | 13.96 | 1.68 |
| 134.1006 | 80.68  | 16.86 | 16.65 | 15.84 | 16.33 | 0.43 |
| 134.1062 | 42.48  | 19.44 | 18.15 | 18.26 | 18.12 | 1.66 |
| 134.1087 | 40.1   | 17.89 | 16.16 | 16.41 | 16.37 | 1.75 |
| 134.1176 | 28.13  | 18.33 | 17.53 | 17.68 | 17.75 | 0.67 |
| 134.1176 | 132.88 | 18.99 | 19.22 | 19.41 | 19.03 | 0.22 |
| 134.4983 | 249.22 | 16.02 | 15.53 | 16.02 | 16.69 | 0.09 |
| 134.4983 | 136.05 | 16.84 | 16.41 | 17.23 | 17.05 | 0.02 |
| 134.5206 | 75.66  | 16.40 | 15.64 | 15.87 | 15.79 | 0.36 |
| 134.5338 | 90.83  | 17.04 | 14.67 | 14.68 | 14.91 | 0.94 |
| 134.5379 | 97.6   | 16.93 | 15.69 | 16.00 | 15.55 | 0.60 |
| 134.5439 | 89.59  | 14.75 | 15.31 | 14.98 | 15.20 | 0.30 |
| 134.5523 | 86.71  | 18.13 | 20.70 | 20.44 | 20.13 | 1.44 |
| 134.9280 | 86.06  | 17.46 | 8.70  | 11.55 | 10.10 | 1.58 |
| 134.9539 | 287.07 | 17.68 | 15.46 | 15.23 | 15.38 | 1.25 |
| 134.9724 | 41.2   | 17.20 | 13.96 | 15.92 | 14.72 | 1.35 |
| 134.9913 | 267.45 | 17.70 | 15.80 | 15.92 | 16.04 | 0.91 |
| 135.0029 | 45.92  | 20.77 | 21.68 | 21.95 | 21.66 | 1.33 |
| 135.0172 | 125.66 | 13.49 | 14.03 | 14.27 | 13.09 | 0.17 |
| 135.0275 | 45.22  | 19.09 | 16.60 | 17.65 | 17.43 | 1.64 |
| 135.0302 | 257.12 | 17.42 | 18.93 | 19.56 | 17.41 | 1.07 |
| 135.0441 | 201.01 | 17.14 | 14.38 | 14.68 | 14.83 | 1.61 |
| 135.0441 | 21.15  | 16.19 | 12.82 | 13.57 | 14.46 | 1.48 |
| 135.0482 | 79.09  | 21.29 | 21.24 | 21.73 | 21.07 | 0.14 |
| 135.0532 | 91.13  | 16.10 | 17.09 | 16.84 | 17.00 | 0.71 |
| 135.0553 | 204.58 | 17.21 | 14.29 | 14.61 | 15.19 | 1.56 |
| 135.0634 | 281.55 | 16.92 | 15.85 | 16.03 | 15.14 | 0.87 |
| 135.0667 | 68.66  | 21.85 | 22.45 | 22.57 | 21.83 | 0.51 |
| 135.0747 | 281.05 | 18.08 | 17.29 | 17.68 | 16.30 | 0.60 |
| 135.0804 | 21.77  | 17.22 | 14.16 | 14.75 | 15.63 | 1.69 |
| 135.0804 | 285.89 | 17.63 | 16.31 | 16.25 | 16.35 | 1.04 |
| 135.0845 | 277.2  | 19.81 | 15.96 | 15.94 | 16.62 | 1.52 |
| 135.0877 | 299.52 | 15.21 | 14.93 | 14.48 | 12.92 | 0.33 |
| 135.0878 | 182.92 | 16.31 | 14.68 | 14.30 | 14.19 | 1.33 |
| 135.0917 | 207.71 | 16.46 | 14.01 | 14.21 | 14.81 | 1.69 |
| 135.1168 | 24.39  | 18.21 | 16.66 | 17.13 | 17.53 | 1.45 |
| 135.1168 | 285.61 | 19.29 | 16.76 | 16.84 | 17.40 | 1.22 |
| 135.1169 | 176.02 | 18.65 | 17.60 | 17.73 | 17.75 | 0.84 |
| 135.4496 | 113.48 | 15.72 | 10.48 | 13.80 | 10.78 | 1.02 |
| 135.5062 | 138.04 | 16.51 | 15.79 | 16.04 | 15.45 | 0.51 |
| 135.5177 | 31.11  | 13.54 | 13.18 | 15.54 | 14.89 | 0.27 |
| 135.5323 | 98.36  | 17.85 | 16.96 | 16.64 | 16.69 | 0.59 |
| 135.5511 | 82.93  | 14.76 | 17.08 | 16.74 | 16.63 | 1.08 |
| 135.9263 | 107.78 | 16.77 | 10.37 | 11.06 | 14.48 | 1.26 |
| 135.9651 | 221.92 | 18.61 | 15.10 | 14.25 | 16.11 | 1.21 |

|          |        |       |       |       |       |      |
|----------|--------|-------|-------|-------|-------|------|
| 135.9701 | 142.6  | 17.84 | 13.80 | 13.38 | 15.69 | 1.65 |
| 135.9766 | 57.37  | 18.35 | 15.47 | 17.16 | 15.96 | 1.08 |
| 135.9922 | 23.4   | 16.06 | 9.82  | 10.43 | 11.00 | 2.03 |
| 135.9945 | 94.65  | 14.15 | 15.01 | 15.86 | 14.40 | 0.41 |
| 136.0011 | 95.37  | 15.30 | 14.79 | 15.75 | 15.60 | 0.02 |
| 136.0064 | 120.11 | 14.30 | 15.34 | 16.09 | 16.10 | 0.63 |
| 136.0117 | 86.51  | 15.20 | 15.77 | 16.12 | 15.35 | 0.68 |
| 136.0143 | 39.3   | 19.80 | 17.41 | 17.75 | 18.34 | 1.56 |
| 136.0215 | 267.28 | 20.91 | 19.40 | 19.55 | 19.67 | 0.87 |
| 136.0244 | 85.17  | 16.64 | 18.26 | 18.27 | 18.10 | 1.21 |
| 136.0392 | 203.03 | 16.91 | 15.89 | 16.59 | 16.95 | 0.48 |
| 136.0484 | 57.15  | 22.59 | 22.32 | 22.34 | 22.13 | 0.52 |
| 136.0556 | 107.47 | 14.85 | 13.88 | 14.20 | 14.40 | 0.60 |
| 136.0617 | 282.03 | 22.99 | 22.91 | 22.56 | 22.11 | 0.18 |
| 136.0757 | 290.25 | 20.42 | 18.11 | 18.23 | 18.85 | 1.24 |
| 136.0757 | 54.93  | 22.36 | 21.43 | 22.10 | 21.78 | 1.10 |
| 136.0968 | 287.4  | 18.56 | 16.84 | 16.45 | 16.97 | 1.08 |
| 136.1064 | 262.5  | 16.37 | 14.87 | 15.32 | 14.43 | 0.84 |
| 136.1202 | 194.37 | 16.18 | 12.85 | 13.04 | 13.86 | 1.54 |
| 136.4963 | 39.68  | 17.46 | 10.58 | 11.00 | 12.53 | 1.81 |
| 136.5075 | 257.92 | 17.77 | 15.38 | 15.93 | 17.06 | 1.45 |
| 136.5140 | 96.37  | 18.70 | 15.48 | 15.96 | 16.04 | 1.62 |
| 136.5272 | 82.26  | 14.47 | 16.74 | 16.36 | 16.22 | 0.89 |
| 136.5515 | 24.9   | 14.75 | 14.49 | 13.14 | 16.38 | 0.20 |
| 136.5534 | 79.14  | 13.90 | 16.15 | 15.54 | 14.37 | 0.74 |
| 136.9310 | 275.75 | 24.03 | 23.90 | 24.20 | 23.75 | 0.05 |
| 136.9311 | 27.62  | 16.60 | 18.54 | 19.55 | 18.29 | 1.73 |
| 136.9312 | 104.41 | 24.79 | 23.41 | 24.27 | 23.25 | 0.89 |
| 136.9403 | 42.43  | 17.47 | 15.05 | 15.33 | 15.71 | 1.55 |
| 136.9637 | 19.43  | 17.78 | 10.23 | 10.98 | 12.01 | 1.96 |
| 137.0068 | 75.65  | 15.48 | 15.62 | 15.14 | 15.83 | 0.00 |
| 137.0250 | 189.71 | 16.83 | 14.75 | 14.93 | 14.93 | 1.53 |
| 137.0458 | 204.4  | 21.38 | 25.53 | 25.94 | 24.53 | 1.63 |
| 137.0514 | 54.72  | 18.09 | 17.24 | 16.90 | 17.21 | 1.07 |
| 137.0550 | 89.03  | 17.56 | 19.32 | 19.08 | 18.81 | 1.04 |
| 137.0597 | 290.69 | 18.16 | 15.67 | 15.46 | 16.79 | 1.10 |
| 137.0651 | 281.38 | 18.08 | 16.93 | 16.95 | 16.84 | 0.81 |
| 137.0717 | 52.6   | 23.10 | 23.13 | 23.13 | 22.54 | 0.06 |
| 137.0759 | 221.05 | 15.38 | 17.35 | 17.09 | 16.94 | 1.30 |
| 137.0790 | 50.11  | 18.69 | 16.90 | 17.78 | 17.55 | 1.52 |
| 137.0822 | 181.38 | 16.84 | 12.71 | 13.20 | 13.31 | 1.57 |
| 137.0960 | 22.51  | 17.29 | 15.52 | 16.06 | 16.39 | 1.30 |
| 137.0961 | 287.64 | 18.74 | 17.00 | 17.10 | 17.08 | 1.17 |
| 137.1073 | 25.62  | 17.44 | 16.16 | 16.17 | 16.27 | 0.77 |
| 137.1074 | 192.22 | 16.30 | 14.29 | 14.08 | 14.77 | 1.40 |
| 137.1324 | 23.53  | 17.31 | 14.87 | 15.17 | 16.25 | 1.60 |
| 137.1325 | 292.69 | 17.72 | 16.04 | 16.33 | 16.21 | 1.03 |
| 137.1325 | 165.1  | 18.19 | 16.44 | 16.35 | 16.98 | 1.14 |
| 137.5153 | 96.1   | 17.51 | 16.16 | 13.82 | 16.05 | 0.98 |
| 137.5242 | 87.31  | 13.47 | 16.11 | 15.37 | 15.69 | 1.06 |
| 137.5554 | 79.34  | 15.22 | 16.18 | 15.44 | 15.95 | 0.38 |
| 137.9610 | 231.86 | 15.77 | 9.88  | 9.55  | 12.45 | 1.25 |
| 137.9610 | 114.13 | 16.71 | 11.88 | 13.95 | 13.50 | 1.12 |
| 137.9642 | 274.49 | 17.89 | 13.20 | 11.14 | 14.95 | 1.28 |
| 137.9746 | 111.29 | 16.79 | 14.16 | 14.04 | 14.11 | 0.99 |
| 137.9875 | 286.16 | 18.51 | 14.49 | 14.02 | 16.21 | 1.49 |

|          |        |       |       |       |       |      |
|----------|--------|-------|-------|-------|-------|------|
| 137.9875 | 146.26 | 18.12 | 14.15 | 13.87 | 15.97 | 1.67 |
| 137.9912 | 40.33  | 13.47 | 16.71 | 19.75 | 18.40 | 1.56 |
| 138.0130 | 48.34  | 20.61 | 19.90 | 20.80 | 19.33 | 0.44 |
| 138.0171 | 36.77  | 17.06 | 15.37 | 16.68 | 15.85 | 0.80 |
| 138.0174 | 163.74 | 16.33 | 13.93 | 14.00 | 14.82 | 1.62 |
| 138.0283 | 67.48  | 20.88 | 21.51 | 21.58 | 21.67 | 0.97 |
| 138.0400 | 86.24  | 15.69 | 15.18 | 15.25 | 15.69 | 0.42 |
| 138.0428 | 284.33 | 16.05 | 17.94 | 18.36 | 17.49 | 1.09 |
| 138.0429 | 43.07  | 22.48 | 20.68 | 21.00 | 21.33 | 1.18 |
| 138.0491 | 198.14 | 16.26 | 21.62 | 21.97 | 20.21 | 1.58 |
| 138.0550 | 162.25 | 19.62 | 21.44 | 20.26 | 21.59 | 0.82 |
| 138.0662 | 19.69  | 18.98 | 17.51 | 17.53 | 17.75 | 1.63 |
| 138.0756 | 49.84  | 19.30 | 18.74 | 18.79 | 18.21 | 0.64 |
| 138.0914 | 152.07 | 17.29 | 14.88 | 15.24 | 15.48 | 1.61 |
| 138.4710 | 121.32 | 15.87 | 15.82 | 16.88 | 15.67 | 0.19 |
| 138.5118 | 90.03  | 20.34 | 15.44 | 15.04 | 17.55 | 1.81 |
| 138.5147 | 36.1   | 14.76 | 14.93 | 16.26 | 14.42 | 0.28 |
| 138.5296 | 289.63 | 14.06 | 16.08 | 15.38 | 15.04 | 0.73 |
| 138.5297 | 102.26 | 18.76 | 16.15 | 16.48 | 16.46 | 1.59 |
| 138.5414 | 29.94  | 17.34 | 19.18 | 20.42 | 19.66 | 1.51 |
| 138.5814 | 110.97 | 16.71 | 16.71 | 16.85 | 16.36 | 0.00 |
| 138.5995 | 60.86  | 18.54 | 19.50 | 19.71 | 19.03 | 1.15 |
| 138.9064 | 49.57  | 16.54 | 15.51 | 15.59 | 16.11 | 0.76 |
| 138.9272 | 104.08 | 17.22 | 14.44 | 15.42 | 14.70 | 1.52 |
| 138.9354 | 103.07 | 17.55 | 15.08 | 16.08 | 15.25 | 1.41 |
| 138.9469 | 57.2   | 16.93 | 13.37 | 15.12 | 13.29 | 0.95 |
| 138.9589 | 261.77 | 20.63 | 15.77 | 15.32 | 17.29 | 1.83 |
| 138.9642 | 86.9   | 17.05 | 20.16 | 20.63 | 19.53 | 1.41 |
| 138.9801 | 266.39 | 18.95 | 15.78 | 15.04 | 17.13 | 1.28 |
| 138.9801 | 145.83 | 18.06 | 15.30 | 14.56 | 16.99 | 1.33 |
| 139.0135 | 86.36  | 17.13 | 12.12 | 12.62 | 13.99 | 1.83 |
| 139.0179 | 271.45 | 20.03 | 17.66 | 17.13 | 18.27 | 1.22 |
| 139.0283 | 89.22  | 16.58 | 16.68 | 17.03 | 16.94 | 0.22 |
| 139.0345 | 82.64  | 16.82 | 18.16 | 18.04 | 17.90 | 1.03 |
| 139.0389 | 275.12 | 17.69 | 19.54 | 20.12 | 18.94 | 1.45 |
| 139.0391 | 27.73  | 16.41 | 15.91 | 16.13 | 16.32 | 0.28 |
| 139.0431 | 30.42  | 15.30 | 15.38 | 16.43 | 16.01 | 0.41 |
| 139.0464 | 40.16  | 18.32 | 15.20 | 15.59 | 16.19 | 1.74 |
| 139.0502 | 288.41 | 17.44 | 17.91 | 17.77 | 16.95 | 0.19 |
| 139.0583 | 170.46 | 16.87 | 17.77 | 16.61 | 17.60 | 0.31 |
| 139.0753 | 288.75 | 18.18 | 16.96 | 17.03 | 16.99 | 0.82 |
| 139.0866 | 280.64 | 17.64 | 15.89 | 15.90 | 16.15 | 1.23 |
| 139.0963 | 208.69 | 16.15 | 11.92 | 13.18 | 13.41 | 1.18 |
| 139.1012 | 61.33  | 16.24 | 15.57 | 15.69 | 15.40 | 0.59 |
| 139.1117 | 286.81 | 19.36 | 17.57 | 17.53 | 17.82 | 1.13 |
| 139.1117 | 24.85  | 18.04 | 17.15 | 17.10 | 16.94 | 0.89 |
| 139.1230 | 164.45 | 15.90 | 15.80 | 15.37 | 15.74 | 0.22 |
| 139.1482 | 202.68 | 16.13 | 14.07 | 14.48 | 14.44 | 0.75 |
| 139.4875 | 91.54  | 16.26 | 18.79 | 19.28 | 18.39 | 1.50 |
| 139.5121 | 79.04  | 18.13 | 15.90 | 16.15 | 16.47 | 0.90 |
| 139.5269 | 98.41  | 20.73 | 15.90 | 17.42 | 17.08 | 1.72 |
| 139.5311 | 100.79 | 23.64 | 20.74 | 22.29 | 21.50 | 1.39 |
| 139.5397 | 86.45  | 15.51 | 15.52 | 15.84 | 15.64 | 0.16 |
| 139.9147 | 40.39  | 15.52 | 16.45 | 15.86 | 17.06 | 0.49 |
| 139.9240 | 270.82 | 17.74 | 14.00 | 14.17 | 14.53 | 1.42 |
| 139.9240 | 121.38 | 17.75 | 15.53 | 15.76 | 16.10 | 1.09 |

|          |        |       |       |       |       |      |
|----------|--------|-------|-------|-------|-------|------|
| 139.9643 | 93.58  | 17.21 | 15.99 | 16.28 | 16.29 | 0.69 |
| 139.9879 | 275.35 | 20.94 | 20.56 | 20.44 | 19.40 | 0.19 |
| 140.0120 | 118.43 | 19.07 | 14.57 | 13.34 | 16.27 | 1.30 |
| 140.0165 | 235.77 | 13.02 | 17.54 | 18.34 | 17.14 | 1.51 |
| 140.0250 | 88.23  | 16.99 | 17.05 | 17.39 | 17.39 | 0.19 |
| 140.0287 | 89.66  | 18.74 | 15.79 | 15.97 | 16.07 | 1.64 |
| 140.0333 | 97.43  | 20.24 | 17.88 | 18.71 | 18.45 | 1.62 |
| 140.0444 | 45.64  | 18.43 | 16.76 | 17.19 | 16.63 | 1.20 |
| 140.0682 | 52.16  | 24.82 | 24.95 | 24.77 | 25.02 | 0.11 |
| 140.0706 | 288.65 | 19.33 | 15.51 | 16.37 | 16.63 | 1.01 |
| 140.0729 | 28.48  | 19.75 | 18.08 | 18.38 | 18.23 | 1.10 |
| 140.0729 | 159.58 | 16.98 | 14.81 | 14.79 | 15.16 | 1.42 |
| 140.0815 | 143.67 | 18.03 | 14.40 | 15.15 | 15.38 | 1.83 |
| 140.1070 | 148.04 | 16.99 | 14.61 | 15.74 | 15.85 | 1.35 |
| 140.1151 | 202.45 | 16.10 | 12.46 | 12.92 | 12.98 | 1.18 |
| 140.1183 | 162.18 | 17.77 | 17.55 | 17.40 | 17.68 | 0.20 |
| 140.4640 | 268.06 | 18.35 | 14.41 | 14.79 | 15.76 | 1.54 |
| 140.4640 | 119.44 | 17.97 | 14.11 | 14.71 | 14.22 | 1.52 |
| 140.4819 | 106.56 | 17.72 | 20.92 | 20.26 | 19.49 | 1.34 |
| 140.4863 | 88.37  | 15.17 | 15.26 | 15.41 | 15.30 | 0.13 |
| 140.4953 | 92.76  | 13.85 | 17.31 | 18.00 | 16.12 | 1.43 |
| 140.5060 | 60.25  | 17.50 | 13.56 | 12.60 | 15.68 | 1.23 |
| 140.5098 | 85.95  | 17.32 | 12.31 | 12.58 | 13.60 | 1.71 |
| 140.5222 | 98.79  | 17.45 | 14.57 | 15.25 | 15.30 | 1.73 |
| 140.5289 | 79.23  | 16.57 | 13.26 | 15.18 | 15.06 | 0.60 |
| 140.5332 | 87.34  | 17.39 | 16.15 | 16.19 | 16.46 | 1.25 |
| 140.5434 | 87.28  | 21.20 | 22.66 | 22.90 | 22.83 | 1.22 |
| 140.5475 | 86.51  | 16.31 | 18.17 | 18.39 | 18.06 | 1.54 |
| 140.5702 | 25.98  | 16.55 | 17.98 | 15.65 | 15.59 | 0.18 |
| 140.9035 | 49.75  | 16.02 | 14.59 | 14.76 | 15.23 | 0.95 |
| 140.9240 | 266.4  | 17.84 | 16.33 | 16.90 | 16.78 | 1.12 |
| 140.9512 | 285.91 | 20.87 | 17.74 | 17.81 | 18.64 | 1.21 |
| 140.9513 | 136.42 | 19.15 | 16.13 | 14.82 | 17.53 | 1.49 |
| 140.9617 | 91.99  | 17.79 | 16.69 | 17.10 | 17.18 | 1.11 |
| 140.9756 | 149.4  | 17.26 | 12.69 | 11.74 | 15.48 | 1.48 |
| 140.9858 | 35.86  | 21.21 | 20.63 | 21.30 | 20.64 | 0.29 |
| 140.9913 | 151.39 | 18.34 | 14.99 | 14.31 | 16.98 | 1.53 |
| 140.9950 | 267.04 | 18.28 | 20.13 | 20.55 | 19.72 | 1.69 |
| 141.0065 | 98.25  | 20.21 | 20.99 | 21.78 | 21.34 | 0.98 |
| 141.0183 | 50.12  | 17.91 | 15.30 | 16.64 | 15.71 | 1.21 |
| 141.0259 | 27.8   | 15.71 | 16.31 | 16.27 | 16.96 | 0.38 |
| 141.0323 | 258.87 | 19.05 | 19.46 | 20.16 | 18.63 | 0.49 |
| 141.0410 | 81.22  | 16.08 | 15.32 | 14.92 | 15.26 | 0.48 |
| 141.0441 | 85.06  | 18.49 | 19.91 | 20.23 | 20.12 | 1.20 |
| 141.0504 | 89.32  | 15.84 | 15.92 | 16.32 | 16.27 | 0.19 |
| 141.0547 | 172.51 | 17.18 | 14.86 | 14.76 | 15.25 | 1.43 |
| 141.0555 | 22.9   | 15.29 | 12.44 | 12.35 | 13.49 | 1.36 |
| 141.0658 | 275.01 | 18.56 | 16.15 | 16.20 | 16.48 | 1.23 |
| 141.0712 | 52.61  | 20.62 | 20.62 | 20.54 | 20.68 | 0.03 |
| 141.0844 | 212.46 | 16.52 | 13.81 | 14.43 | 14.30 | 1.54 |
| 141.0910 | 288.86 | 18.51 | 17.04 | 17.07 | 17.26 | 0.99 |
| 141.1024 | 186.28 | 16.27 | 13.77 | 13.74 | 14.82 | 1.62 |
| 141.1274 | 201.39 | 16.52 | 13.87 | 14.32 | 14.75 | 1.55 |
| 141.4801 | 111.22 | 16.56 | 14.56 | 15.15 | 15.08 | 1.08 |
| 141.4984 | 86.27  | 15.71 | 18.18 | 18.35 | 17.25 | 1.57 |
| 141.5224 | 68.29  | 17.14 | 11.69 | 12.06 | 14.39 | 1.62 |

|          |        |       |       |       |       |      |
|----------|--------|-------|-------|-------|-------|------|
| 141.5275 | 89.42  | 18.01 | 15.43 | 15.39 | 16.07 | 1.44 |
| 141.5300 | 100.64 | 18.02 | 14.22 | 14.95 | 14.59 | 1.22 |
| 141.5340 | 101.94 | 19.32 | 15.51 | 16.62 | 16.14 | 1.67 |
| 141.5422 | 84.55  | 18.20 | 19.51 | 19.90 | 19.83 | 1.14 |
| 141.5456 | 84.84  | 16.60 | 16.42 | 16.65 | 17.09 | 0.01 |
| 141.5635 | 116.2  | 13.71 | 14.97 | 15.43 | 14.60 | 0.77 |
| 141.9210 | 273.13 | 17.62 | 13.36 | 13.93 | 14.08 | 1.41 |
| 141.9210 | 122.26 | 17.23 | 15.21 | 15.36 | 16.15 | 0.86 |
| 141.9514 | 272.11 | 17.92 | 13.72 | 12.32 | 15.32 | 1.24 |
| 141.9586 | 278.22 | 23.10 | 19.17 | 18.76 | 20.70 | 1.59 |
| 141.9833 | 277.09 | 20.45 | 19.33 | 18.26 | 17.82 | 0.59 |
| 141.9891 | 29.22  | 16.90 | 14.43 | 16.02 | 14.96 | 1.09 |
| 142.0081 | 89.95  | 19.36 | 18.88 | 19.36 | 19.21 | 0.18 |
| 142.0264 | 97.64  | 24.43 | 25.69 | 25.82 | 25.34 | 1.41 |
| 142.0326 | 227.09 | 14.78 | 17.47 | 18.05 | 16.81 | 1.23 |
| 142.0332 | 75.98  | 18.92 | 17.93 | 17.69 | 17.81 | 0.90 |
| 142.0394 | 91.75  | 18.06 | 17.76 | 17.39 | 17.08 | 0.28 |
| 142.0439 | 82.78  | 16.17 | 15.71 | 15.96 | 16.14 | 0.25 |
| 142.0499 | 255.76 | 19.62 | 18.02 | 17.67 | 17.68 | 0.91 |
| 142.0608 | 23.45  | 16.58 | 15.96 | 16.98 | 16.14 | 0.17 |
| 142.0611 | 188.79 | 16.61 | 13.39 | 13.91 | 14.34 | 1.68 |
| 142.0651 | 37.9   | 19.23 | 18.13 | 18.53 | 18.77 | 1.08 |
| 142.0724 | 51.69  | 16.98 | 15.32 | 15.68 | 16.08 | 1.11 |
| 142.0776 | 197.05 | 15.87 | 13.12 | 13.01 | 13.58 | 1.06 |
| 142.0776 | 23.06  | 15.94 | 11.04 | 12.75 | 13.80 | 1.13 |
| 142.0862 | 296.6  | 18.28 | 16.73 | 17.29 | 17.00 | 0.64 |
| 142.0863 | 185.37 | 18.91 | 18.56 | 18.44 | 17.76 | 0.32 |
| 142.1226 | 264.82 | 18.47 | 16.72 | 16.26 | 17.05 | 1.21 |
| 142.4971 | 93.2   | 15.01 | 15.35 | 15.84 | 15.12 | 0.32 |
| 142.5091 | 83.52  | 16.78 | 16.04 | 15.56 | 16.37 | 0.50 |
| 142.5222 | 66.8   | 16.79 | 12.69 | 12.51 | 13.81 | 1.29 |
| 142.5410 | 253.19 | 18.24 | 14.46 | 14.72 | 16.37 | 1.44 |
| 142.5410 | 83.76  | 21.54 | 22.18 | 22.27 | 21.50 | 0.30 |
| 142.5465 | 86.28  | 15.30 | 16.53 | 16.33 | 16.22 | 0.92 |
| 142.5495 | 89.35  | 16.08 | 16.24 | 16.25 | 16.05 | 0.11 |
| 142.9481 | 240.82 | 18.12 | 15.94 | 14.08 | 16.68 | 1.04 |
| 142.9669 | 293.22 | 18.96 | 15.32 | 15.28 | 16.30 | 1.26 |
| 142.9836 | 152.44 | 17.03 | 11.23 | 10.35 | 14.92 | 1.55 |
| 142.9866 | 144.43 | 17.41 | 11.31 | 10.97 | 14.71 | 1.69 |
| 142.9915 | 19.8   | 17.69 | 15.19 | 15.64 | 16.12 | 1.66 |
| 143.0036 | 95.48  | 18.90 | 19.47 | 20.39 | 19.88 | 0.84 |
| 143.0060 | 236.35 | 16.41 | 16.13 | 16.02 | 16.13 | 0.21 |
| 143.0190 | 84.18  | 16.18 | 16.69 | 16.81 | 16.80 | 0.64 |
| 143.0235 | 95.26  | 16.74 | 16.44 | 16.44 | 16.25 | 0.45 |
| 143.0298 | 97.03  | 18.69 | 19.96 | 20.19 | 19.43 | 1.37 |
| 143.0339 | 199.23 | 21.76 | 19.67 | 19.76 | 19.97 | 0.97 |
| 143.0396 | 299.31 | 18.36 | 17.03 | 16.02 | 17.60 | 1.05 |
| 143.0426 | 93.59  | 16.10 | 14.92 | 14.81 | 15.03 | 0.64 |
| 143.0503 | 87.83  | 20.36 | 22.44 | 22.74 | 22.25 | 1.35 |
| 143.0634 | 109.86 | 16.07 | 14.90 | 16.07 | 16.03 | 0.44 |
| 143.0695 | 26.59  | 16.61 | 12.57 | 12.84 | 13.82 | 1.63 |
| 143.0703 | 283.19 | 17.21 | 15.53 | 15.40 | 15.63 | 1.27 |
| 143.0730 | 38.87  | 19.74 | 18.52 | 19.13 | 18.96 | 1.29 |
| 143.0815 | 277.64 | 18.77 | 17.54 | 16.72 | 17.89 | 0.88 |
| 143.0855 | 23.57  | 16.68 | 13.50 | 14.28 | 15.10 | 1.60 |
| 143.0856 | 166.2  | 16.48 | 13.86 | 14.10 | 14.68 | 1.69 |



|          |        |       |       |       |       |      |
|----------|--------|-------|-------|-------|-------|------|
| 143.0902 | 183.96 | 15.87 | 12.98 | 13.61 | 14.14 | 1.29 |
| 143.1066 | 288.96 | 17.35 | 16.21 | 16.10 | 16.11 | 1.03 |
| 143.1179 | 42.58  | 17.83 | 18.01 | 17.33 | 17.15 | 0.20 |
| 143.5076 | 113.83 | 16.66 | 12.92 | 13.14 | 13.56 | 1.14 |
| 143.5432 | 97.32  | 15.66 | 13.95 | 14.44 | 14.37 | 0.54 |
| 143.5513 | 86.78  | 17.72 | 19.67 | 20.03 | 19.56 | 1.39 |
| 143.5792 | 70.9   | 15.10 | 15.95 | 15.72 | 14.97 | 0.31 |
| 143.9194 | 120.57 | 16.52 | 14.30 | 14.23 | 14.88 | 1.04 |
| 143.9522 | 264.98 | 17.82 | 15.94 | 16.24 | 16.40 | 1.25 |
| 143.9590 | 143.11 | 18.14 | 14.30 | 13.54 | 16.18 | 1.70 |
| 143.9696 | 86.51  | 16.78 | 19.73 | 20.07 | 19.23 | 1.49 |
| 143.9809 | 264.13 | 19.37 | 16.00 | 15.14 | 17.00 | 1.28 |
| 143.9817 | 132.57 | 17.56 | 14.86 | 14.53 | 16.19 | 0.99 |
| 143.9881 | 69.55  | 16.74 | 10.86 | 12.81 | 11.85 | 1.24 |
| 143.9969 | 119.38 | 22.16 | 20.01 | 20.22 | 20.08 | 1.41 |
| 144.0011 | 89.28  | 15.75 | 20.47 | 20.69 | 19.13 | 1.76 |
| 144.0043 | 90.97  | 17.04 | 15.99 | 16.01 | 16.18 | 0.91 |
| 144.0070 | 90.12  | 14.63 | 12.73 | 15.71 | 15.45 | 0.13 |
| 144.0114 | 189.4  | 16.25 | 14.97 | 14.72 | 15.58 | 1.04 |
| 144.0115 | 64.65  | 17.13 | 16.89 | 16.63 | 16.42 | 0.29 |
| 144.0307 | 97.5   | 17.15 | 18.43 | 18.53 | 17.96 | 1.48 |
| 144.0372 | 294.23 | 16.88 | 15.89 | 15.59 | 15.67 | 0.90 |
| 144.0414 | 75.52  | 15.46 | 16.92 | 16.79 | 16.80 | 0.88 |
| 144.0445 | 39.03  | 17.20 | 15.00 | 15.57 | 15.92 | 1.52 |
| 144.0483 | 67.54  | 19.30 | 19.82 | 20.05 | 20.08 | 0.87 |
| 144.0523 | 87.06  | 15.93 | 16.10 | 16.58 | 16.44 | 0.45 |
| 144.0631 | 52.89  | 17.82 | 13.71 | 13.48 | 15.15 | 1.59 |
| 144.0655 | 276.26 | 21.83 | 20.96 | 20.86 | 21.06 | 0.55 |
| 144.0712 | 87.75  | 15.82 | 15.77 | 16.49 | 15.82 | 0.16 |
| 144.0751 | 278.83 | 17.13 | 15.88 | 16.10 | 15.66 | 0.98 |
| 144.0758 | 25.06  | 16.48 | 12.94 | 13.79 | 14.09 | 1.62 |
| 144.0808 | 46.36  | 22.50 | 21.60 | 22.03 | 21.90 | 1.11 |
| 144.0842 | 200.32 | 16.24 | 13.88 | 14.52 | 14.29 | 1.57 |
| 144.1020 | 154.84 | 18.83 | 21.27 | 20.24 | 20.90 | 1.02 |
| 144.1383 | 267.13 | 16.91 | 15.48 | 15.45 | 15.97 | 1.23 |
| 144.4549 | 116.57 | 16.28 | 11.53 | 13.70 | 13.27 | 1.16 |
| 144.5015 | 86.92  | 12.52 | 16.66 | 16.86 | 15.54 | 1.66 |
| 144.5160 | 66.73  | 16.64 | 14.00 | 16.12 | 15.22 | 0.76 |
| 144.5294 | 94.21  | 15.06 | 14.55 | 14.91 | 13.84 | 0.32 |
| 144.5376 | 101.26 | 16.31 | 15.20 | 15.00 | 14.59 | 0.55 |
| 144.5420 | 94.58  | 16.35 | 14.15 | 13.90 | 14.14 | 0.85 |
| 144.5516 | 90.66  | 18.54 | 21.27 | 21.19 | 20.57 | 1.40 |
| 144.5671 | 24.54  | 14.44 | 15.95 | 14.79 | 17.40 | 0.58 |
| 144.9569 | 25.54  | 19.25 | 19.10 | 19.81 | 19.06 | 0.12 |
| 144.9704 | 87.82  | 15.63 | 15.90 | 16.01 | 15.77 | 0.30 |
| 144.9821 | 21.8   | 23.12 | 22.22 | 22.59 | 22.71 | 1.06 |
| 144.9821 | 209.07 | 23.34 | 24.49 | 24.11 | 23.60 | 0.46 |
| 144.9920 | 277.33 | 19.37 | 16.13 | 16.46 | 16.76 | 1.61 |
| 144.9921 | 33.91  | 18.74 | 20.72 | 21.94 | 20.93 | 1.67 |
| 144.9955 | 83.79  | 19.19 | 19.14 | 19.68 | 19.28 | 0.13 |
| 145.0001 | 90.19  | 17.99 | 17.59 | 18.24 | 17.82 | 0.10 |
| 145.0163 | 114.56 | 15.67 | 18.83 | 19.16 | 17.66 | 1.54 |
| 145.0215 | 95.72  | 15.76 | 13.88 | 13.69 | 14.38 | 0.65 |
| 145.0284 | 27.82  | 15.91 | 17.39 | 17.76 | 18.36 | 0.97 |
| 145.0352 | 300.39 | 20.27 | 19.85 | 19.17 | 20.06 | 0.44 |
| 145.0439 | 90.61  | 19.44 | 19.22 | 18.87 | 18.83 | 0.24 |

|          |        |       |       |       |       |      |
|----------|--------|-------|-------|-------|-------|------|
| 145.0495 | 284.61 | 23.08 | 22.49 | 22.31 | 22.07 | 0.43 |
| 145.0533 | 88.13  | 15.80 | 16.19 | 16.08 | 16.04 | 0.27 |
| 145.0608 | 215.27 | 16.62 | 15.81 | 15.98 | 16.69 | 0.63 |
| 145.0648 | 184.84 | 16.38 | 14.07 | 14.38 | 14.78 | 1.65 |
| 145.0688 | 266.74 | 18.09 | 16.21 | 16.08 | 16.00 | 1.20 |
| 145.0761 | 196.96 | 16.37 | 13.64 | 13.53 | 13.52 | 1.18 |
| 145.0842 | 39.29  | 19.13 | 17.78 | 18.26 | 18.24 | 1.46 |
| 145.0874 | 163.12 | 16.50 | 14.21 | 14.86 | 14.64 | 1.43 |
| 145.0971 | 257.29 | 18.81 | 18.35 | 19.40 | 18.27 | 0.05 |
| 145.1011 | 23.95  | 18.53 | 16.02 | 16.84 | 17.59 | 1.40 |
| 145.1012 | 283.8  | 17.14 | 15.86 | 16.08 | 15.90 | 0.82 |
| 145.1012 | 161    | 17.97 | 15.73 | 16.05 | 16.39 | 1.45 |
| 145.1054 | 60     | 20.76 | 20.44 | 20.41 | 20.17 | 0.52 |
| 145.4967 | 38.11  | 14.37 | 13.96 | 17.78 | 17.08 | 0.49 |
| 145.5128 | 258.52 | 17.91 | 16.00 | 16.45 | 17.42 | 1.20 |
| 145.5179 | 86.22  | 12.41 | 15.56 | 15.71 | 14.56 | 1.30 |
| 145.5504 | 87.92  | 14.50 | 17.86 | 17.84 | 17.10 | 1.28 |
| 145.5567 | 24.71  | 15.13 | 15.98 | 15.56 | 16.99 | 0.41 |
| 145.9672 | 87.16  | 13.06 | 16.00 | 16.15 | 15.46 | 1.31 |
| 145.9802 | 130.94 | 16.98 | 12.42 | 14.08 | 14.14 | 1.39 |
| 145.9855 | 178.73 | 17.91 | 17.22 | 17.50 | 17.22 | 0.40 |
| 145.9933 | 118.81 | 15.62 | 14.41 | 11.86 | 13.95 | 0.84 |
| 145.9991 | 94.71  | 15.88 | 15.92 | 15.56 | 15.04 | 0.10 |
| 146.0064 | 131.16 | 15.32 | 14.19 | 14.57 | 14.90 | 0.39 |
| 146.0120 | 85.17  | 17.11 | 18.07 | 17.69 | 17.80 | 0.68 |
| 146.0157 | 86.68  | 15.31 | 15.98 | 15.91 | 15.34 | 0.53 |
| 146.0192 | 300.76 | 17.49 | 15.65 | 14.88 | 16.24 | 1.24 |
| 146.0271 | 46.13  | 21.76 | 22.47 | 22.20 | 21.71 | 0.36 |
| 146.0300 | 93.96  | 14.87 | 15.35 | 15.66 | 16.02 | 0.34 |
| 146.0300 | 30.02  | 16.31 | 18.57 | 18.61 | 18.79 | 1.50 |
| 146.0352 | 36.9   | 14.14 | 16.84 | 16.90 | 12.42 | 0.65 |
| 146.0386 | 297.68 | 15.76 | 13.17 | 11.87 | 13.97 | 1.36 |
| 146.0449 | 98.26  | 16.33 | 15.43 | 15.41 | 15.41 | 0.61 |
| 146.0529 | 288.31 | 17.98 | 17.29 | 17.16 | 16.64 | 0.65 |
| 146.0529 | 30.32  | 17.68 | 16.98 | 16.54 | 16.79 | 1.08 |
| 146.0600 | 284.11 | 20.19 | 18.79 | 18.76 | 18.93 | 0.75 |
| 146.0601 | 48.62  | 21.95 | 21.26 | 21.47 | 21.48 | 0.99 |
| 146.0686 | 119.7  | 16.81 | 17.40 | 18.05 | 17.17 | 0.56 |
| 146.0723 | 183.24 | 17.44 | 14.73 | 14.74 | 15.21 | 1.60 |
| 146.1006 | 137.87 | 14.12 | 13.43 | 14.06 | 13.92 | 0.19 |
| 146.1057 | 45.66  | 16.17 | 15.32 | 14.17 | 15.51 | 0.43 |
| 146.1176 | 44.57  | 23.82 | 24.26 | 24.22 | 23.84 | 0.59 |
| 146.1653 | 80.04  | 18.58 | 23.33 | 20.19 | 23.07 | 1.15 |
| 146.4985 | 174.58 | 15.22 | 15.30 | 16.35 | 15.14 | 0.17 |
| 146.5247 | 255.17 | 16.30 | 12.55 | 19.14 | 15.13 | 0.20 |
| 146.5390 | 44.66  | 14.76 | 14.21 | 16.07 | 13.20 | 0.00 |
| 146.5703 | 118.94 | 14.71 | 14.25 | 14.49 | 14.04 | 0.27 |
| 146.9576 | 121.62 | 17.66 | 13.85 | 15.33 | 14.59 | 1.42 |
| 146.9613 | 288.88 | 18.43 | 15.15 | 14.46 | 16.26 | 1.14 |
| 146.9750 | 284.78 | 15.03 | 15.49 | 16.09 | 14.65 | 0.24 |
| 146.9803 | 199.24 | 21.91 | 23.29 | 23.34 | 22.78 | 0.82 |
| 146.9874 | 123.53 | 15.08 | 14.16 | 14.22 | 14.70 | 0.29 |
| 147.0183 | 36.4   | 15.94 | 16.10 | 17.54 | 15.89 | 0.33 |
| 147.0224 | 58.48  | 17.52 | 16.34 | 16.30 | 17.20 | 0.77 |
| 147.0251 | 30.33  | 13.91 | 14.07 | 14.96 | 13.77 | 0.22 |
| 147.0262 | 192.66 | 13.75 | 15.34 | 15.87 | 16.45 | 0.69 |

|          |        |       |       |       |       |      |
|----------|--------|-------|-------|-------|-------|------|
| 147.0307 | 299.37 | 20.02 | 19.18 | 18.67 | 19.93 | 0.50 |
| 147.0441 | 60.2   | 21.64 | 20.90 | 21.32 | 20.87 | 0.94 |
| 147.0476 | 28.86  | 15.77 | 14.63 | 14.26 | 14.16 | 0.55 |
| 147.0552 | 174.94 | 16.84 | 14.63 | 14.46 | 14.44 | 1.39 |
| 147.0650 | 286.08 | 17.87 | 16.83 | 17.10 | 16.94 | 0.74 |
| 147.0765 | 152.81 | 19.37 | 24.95 | 21.86 | 24.63 | 1.36 |
| 147.0804 | 21.52  | 16.65 | 12.88 | 13.83 | 14.54 | 1.77 |
| 147.0804 | 202.41 | 17.59 | 14.82 | 15.29 | 15.25 | 1.50 |
| 147.0845 | 291.64 | 17.87 | 17.97 | 17.75 | 18.26 | 0.04 |
| 147.0917 | 201.92 | 15.53 | 11.38 | 12.20 | 11.89 | 1.20 |
| 147.1127 | 77.44  | 23.69 | 24.82 | 24.90 | 24.69 | 0.78 |
| 147.1167 | 23.86  | 18.25 | 15.41 | 16.21 | 17.00 | 1.66 |
| 147.1168 | 297.21 | 17.15 | 16.63 | 16.64 | 16.54 | 0.33 |
| 147.1209 | 124.15 | 13.24 | 15.75 | 13.24 | 15.16 | 0.52 |
| 147.1622 | 29.22  | 14.82 | 14.72 | 12.73 | 15.54 | 0.38 |
| 147.1685 | 281.85 | 15.26 | 16.16 | 16.07 | 15.92 | 0.50 |
| 147.1685 | 80.79  | 14.22 | 18.97 | 15.93 | 18.88 | 1.06 |
| 147.4763 | 122.51 | 15.60 | 14.76 | 15.91 | 15.03 | 0.25 |
| 147.4982 | 30.66  | 15.00 | 12.29 | 16.41 | 15.29 | 0.31 |
| 147.5149 | 156.57 | 14.40 | 15.03 | 15.42 | 14.39 | 0.28 |
| 147.5226 | 193.51 | 15.36 | 15.20 | 15.77 | 16.33 | 0.16 |
| 147.5285 | 70.87  | 16.77 | 14.91 | 15.47 | 15.88 | 0.65 |
| 147.5337 | 73.97  | 16.14 | 16.55 | 16.42 | 16.47 | 0.20 |
| 147.5466 | 29.64  | 15.52 | 17.04 | 16.92 | 17.45 | 1.00 |
| 147.6905 | 32.38  | 15.67 | 11.57 | 13.27 | 14.11 | 1.23 |
| 147.9562 | 115.79 | 15.99 | 9.42  | 12.03 | 11.35 | 1.43 |
| 147.9741 | 114.56 | 15.30 | 12.56 | 14.73 | 13.87 | 0.59 |
| 147.9837 | 176.43 | 16.87 | 15.58 | 15.83 | 15.70 | 0.95 |
| 147.9898 | 25.14  | 17.04 | 16.16 | 16.23 | 16.29 | 0.90 |
| 148.0039 | 57.6   | 26.72 | 26.89 | 26.97 | 26.80 | 0.34 |
| 148.0165 | 107.13 | 16.36 | 12.89 | 13.81 | 13.24 | 1.24 |
| 148.0220 | 100.72 | 19.67 | 15.08 | 16.39 | 16.45 | 1.63 |
| 148.0264 | 43.47  | 17.91 | 17.44 | 17.11 | 17.55 | 0.57 |
| 148.0298 | 36.15  | 16.34 | 15.10 | 14.20 | 14.45 | 0.87 |
| 148.0393 | 274.57 | 18.30 | 16.41 | 16.09 | 16.84 | 1.34 |
| 148.0431 | 49.79  | 19.39 | 21.20 | 20.96 | 21.34 | 1.41 |
| 148.0474 | 50.52  | 18.03 | 16.39 | 16.85 | 16.62 | 1.58 |
| 148.0506 | 283.97 | 19.01 | 18.65 | 18.52 | 17.95 | 0.42 |
| 148.0604 | 69.29  | 27.82 | 28.44 | 28.10 | 27.98 | 0.73 |
| 148.0700 | 287.24 | 17.72 | 16.66 | 16.66 | 16.12 | 0.84 |
| 148.0756 | 273.41 | 17.68 | 15.45 | 15.52 | 16.03 | 1.30 |
| 148.0798 | 152.4  | 17.23 | 20.69 | 17.76 | 20.36 | 0.89 |
| 148.0879 | 284.31 | 20.42 | 19.33 | 19.47 | 19.51 | 0.43 |
| 148.0967 | 285.5  | 21.78 | 20.77 | 20.29 | 20.98 | 0.33 |
| 148.1098 | 79.16  | 24.76 | 26.16 | 26.01 | 25.76 | 1.22 |
| 148.1158 | 78.94  | 19.78 | 20.30 | 20.81 | 20.39 | 0.55 |
| 148.5146 | 80.52  | 14.70 | 14.44 | 14.54 | 15.31 | 0.03 |
| 148.5174 | 86.54  | 18.25 | 16.53 | 16.19 | 16.33 | 0.96 |
| 148.5321 | 27.75  | 13.68 | 17.99 | 17.76 | 17.52 | 1.48 |
| 148.5321 | 270.54 | 17.92 | 19.54 | 19.87 | 18.67 | 0.76 |
| 148.5322 | 94.98  | 24.04 | 20.23 | 20.90 | 20.91 | 1.65 |
| 148.5363 | 93.82  | 18.92 | 16.72 | 17.37 | 17.26 | 1.38 |
| 148.5677 | 27.27  | 16.37 | 17.47 | 15.30 | 15.31 | 0.03 |
| 148.9352 | 48.91  | 15.36 | 14.49 | 14.31 | 15.03 | 0.70 |
| 148.9402 | 39.47  | 14.14 | 16.59 | 16.34 | 16.16 | 1.37 |
| 148.9435 | 127.02 | 15.55 | 9.41  | 10.21 | 13.91 | 1.31 |

|          |        |       |       |       |       |      |
|----------|--------|-------|-------|-------|-------|------|
| 148.9612 | 45.57  | 16.42 | 15.37 | 16.58 | 16.55 | 0.25 |
| 148.9688 | 285.63 | 16.61 | 13.33 | 13.53 | 13.12 | 1.14 |
| 148.9769 | 300.15 | 18.48 | 15.01 | 13.94 | 16.45 | 1.18 |
| 148.9849 | 35.47  | 12.23 | 12.96 | 15.48 | 14.15 | 0.61 |
| 148.9890 | 33.01  | 12.54 | 10.73 | 16.09 | 14.06 | 0.20 |
| 149.0009 | 53.36  | 18.17 | 18.37 | 18.46 | 17.90 | 0.27 |
| 149.0033 | 53.16  | 19.40 | 19.76 | 19.86 | 19.31 | 0.57 |
| 149.0072 | 56.66  | 20.91 | 21.42 | 21.52 | 20.98 | 0.88 |
| 149.0121 | 28.74  | 14.75 | 16.18 | 15.03 | 16.44 | 0.48 |
| 149.0185 | 62.17  | 18.17 | 16.66 | 15.33 | 16.14 | 1.12 |
| 149.0233 | 276.04 | 23.25 | 23.28 | 22.14 | 22.96 | 0.16 |
| 149.0264 | 61.34  | 18.42 | 19.49 | 20.17 | 20.24 | 1.11 |
| 149.0339 | 104.91 | 20.70 | 15.89 | 17.12 | 17.45 | 1.75 |
| 149.0382 | 82.95  | 16.49 | 15.81 | 15.98 | 15.50 | 0.55 |
| 149.0460 | 55.66  | 19.22 | 21.15 | 20.76 | 20.59 | 1.24 |
| 149.0587 | 56.89  | 20.61 | 20.70 | 20.83 | 20.51 | 0.25 |
| 149.0636 | 70.03  | 23.63 | 24.35 | 24.28 | 23.81 | 0.94 |
| 149.0709 | 286.23 | 17.78 | 16.32 | 16.07 | 16.18 | 1.09 |
| 149.0767 | 69.44  | 16.43 | 14.64 | 15.17 | 15.16 | 1.40 |
| 149.0810 | 66.33  | 20.54 | 20.50 | 20.76 | 20.39 | 0.10 |
| 149.0913 | 185.27 | 16.74 | 13.79 | 14.27 | 14.79 | 1.67 |
| 149.0960 | 23     | 17.06 | 14.08 | 14.78 | 15.21 | 1.82 |
| 149.0961 | 278.97 | 17.42 | 16.17 | 15.92 | 16.07 | 0.98 |
| 149.1001 | 286.69 | 19.38 | 16.64 | 16.75 | 16.77 | 1.45 |
| 149.1069 | 76.76  | 16.71 | 17.27 | 17.17 | 16.96 | 0.63 |
| 149.1132 | 77.9   | 20.65 | 22.29 | 22.19 | 21.67 | 1.26 |
| 149.1324 | 23.8   | 17.92 | 15.94 | 16.30 | 16.96 | 1.52 |
| 149.1324 | 297.77 | 17.61 | 16.94 | 16.88 | 16.99 | 0.46 |
| 149.4692 | 270.34 | 17.57 | 13.96 | 15.15 | 14.58 | 1.04 |
| 149.4871 | 106.09 | 14.82 | 17.02 | 16.34 | 15.94 | 0.94 |
| 149.4996 | 177.4  | 13.79 | 10.47 | 9.29  | 11.15 | 0.95 |
| 149.5003 | 92.99  | 12.05 | 14.89 | 14.99 | 13.40 | 0.73 |
| 149.5157 | 89.97  | 17.70 | 11.61 | 12.50 | 12.83 | 1.92 |
| 149.5304 | 84.84  | 17.38 | 16.49 | 16.68 | 16.35 | 0.84 |
| 149.5342 | 96.47  | 17.59 | 8.69  | 12.97 | 10.85 | 1.48 |
| 149.5487 | 86.7   | 20.75 | 22.52 | 22.57 | 22.68 | 1.37 |
| 149.5593 | 24.53  | 14.15 | 14.88 | 13.56 | 16.28 | 0.15 |
| 149.5755 | 26.08  | 16.38 | 17.97 | 15.19 | 15.22 | 0.11 |
| 149.5973 | 89.17  | 15.65 | 16.77 | 16.67 | 16.38 | 0.63 |
| 149.9403 | 250.94 | 19.35 | 13.99 | 12.41 | 15.82 | 1.63 |
| 149.9404 | 101.24 | 20.49 | 16.35 | 15.13 | 17.97 | 1.60 |
| 149.9528 | 134.85 | 18.83 | 15.19 | 15.43 | 15.93 | 1.40 |
| 149.9928 | 56.74  | 18.97 | 16.23 | 17.30 | 15.74 | 1.07 |
| 149.9956 | 278.17 | 19.27 | 19.33 | 19.60 | 19.44 | 0.14 |
| 149.9997 | 54.76  | 22.02 | 22.56 | 22.61 | 22.12 | 0.86 |
| 150.0079 | 55.19  | 19.05 | 19.44 | 19.45 | 18.89 | 0.56 |
| 150.0137 | 66.28  | 16.13 | 10.37 | 11.44 | 12.56 | 1.55 |
| 150.0141 | 301.16 | 19.56 | 19.28 | 18.59 | 19.41 | 0.31 |
| 150.0266 | 22.21  | 18.60 | 16.91 | 16.93 | 16.87 | 1.47 |
| 150.0266 | 286.34 | 19.24 | 18.40 | 18.25 | 17.63 | 0.51 |
| 150.0301 | 75.65  | 14.67 | 13.81 | 15.80 | 14.78 | 0.01 |
| 150.0376 | 290.57 | 13.55 | 15.80 | 15.24 | 14.70 | 0.82 |
| 150.0387 | 68.7   | 16.92 | 14.85 | 13.40 | 15.85 | 0.87 |
| 150.0491 | 83.73  | 17.77 | 19.30 | 19.34 | 19.56 | 1.21 |
| 150.0549 | 286.08 | 18.32 | 16.53 | 16.47 | 16.58 | 1.23 |
| 150.0550 | 22.54  | 17.91 | 15.53 | 15.53 | 15.97 | 1.43 |

|          |        |       |       |       |       |      |
|----------|--------|-------|-------|-------|-------|------|
| 150.0583 | 55.65  | 25.03 | 23.49 | 24.11 | 23.84 | 1.62 |
| 150.0654 | 109.08 | 20.75 | 21.53 | 21.49 | 20.97 | 0.99 |
| 150.0663 | 287.68 | 20.13 | 20.40 | 20.30 | 19.35 | 0.04 |
| 150.0856 | 282.47 | 19.13 | 18.29 | 18.34 | 17.37 | 0.56 |
| 150.0913 | 278.81 | 16.67 | 15.09 | 15.24 | 15.68 | 1.11 |
| 150.0913 | 175.81 | 17.29 | 14.98 | 14.99 | 15.64 | 1.53 |
| 150.1035 | 288.85 | 18.93 | 18.58 | 18.73 | 18.40 | 0.17 |
| 150.1125 | 198.85 | 16.17 | 11.88 | 12.30 | 12.29 | 1.68 |
| 150.1137 | 72.53  | 16.58 | 18.23 | 17.50 | 17.27 | 1.04 |
| 150.1165 | 75.95  | 15.55 | 15.50 | 15.26 | 15.48 | 0.11 |
| 150.5157 | 30.01  | 14.94 | 13.21 | 16.76 | 15.19 | 0.04 |
| 150.5286 | 96.45  | 18.56 | 15.06 | 15.54 | 15.95 | 1.48 |
| 150.5352 | 100.66 | 17.28 | 12.45 | 14.17 | 13.55 | 1.39 |
| 150.5384 | 62.91  | 16.90 | 15.82 | 17.24 | 16.81 | 0.28 |
| 150.5475 | 83.58  | 17.67 | 19.36 | 19.45 | 19.62 | 1.29 |
| 150.5508 | 84.15  | 16.61 | 16.30 | 16.47 | 16.77 | 0.14 |
| 150.9195 | 41.77  | 14.25 | 13.93 | 12.76 | 14.49 | 0.40 |
| 150.9768 | 44.66  | 19.48 | 20.80 | 21.06 | 20.68 | 1.43 |
| 151.0030 | 53.05  | 16.29 | 15.38 | 15.59 | 15.51 | 0.68 |
| 151.0121 | 88.97  | 18.79 | 22.53 | 22.85 | 21.68 | 1.52 |
| 151.0170 | 77.81  | 15.63 | 9.05  | 9.73  | 10.73 | 1.63 |
| 151.0242 | 183.87 | 16.35 | 13.20 | 13.84 | 14.33 | 1.54 |
| 151.0353 | 92.77  | 20.74 | 21.54 | 21.74 | 21.87 | 0.66 |
| 151.0390 | 104.54 | 23.15 | 20.29 | 21.49 | 20.87 | 1.56 |
| 151.0420 | 41.49  | 15.32 | 15.12 | 14.96 | 15.52 | 0.12 |
| 151.0479 | 71.12  | 19.31 | 19.38 | 19.22 | 19.13 | 0.02 |
| 151.0583 | 188.74 | 16.69 | 14.72 | 14.87 | 14.59 | 1.41 |
| 151.0615 | 253.56 | 18.43 | 16.77 | 17.14 | 16.77 | 1.42 |
| 151.0617 | 48.42  | 20.55 | 18.69 | 19.51 | 19.15 | 1.62 |
| 151.0752 | 284.81 | 19.14 | 17.86 | 17.94 | 17.64 | 0.81 |
| 151.0793 | 289.07 | 20.26 | 19.57 | 19.10 | 20.08 | 0.42 |
| 151.0866 | 133.54 | 18.07 | 15.81 | 16.53 | 16.58 | 1.47 |
| 151.0968 | 190.42 | 16.59 | 14.26 | 15.00 | 14.82 | 1.37 |
| 151.1069 | 213.25 | 15.80 | 11.79 | 13.09 | 12.42 | 0.83 |
| 151.1117 | 22.94  | 17.77 | 15.50 | 16.33 | 16.28 | 1.50 |
| 151.1117 | 289.29 | 18.33 | 17.06 | 17.14 | 17.24 | 0.83 |
| 151.1441 | 33.8   | 18.80 | 17.71 | 17.46 | 16.76 | 0.45 |
| 151.1480 | 23.05  | 16.82 | 13.24 | 14.10 | 14.73 | 1.83 |
| 151.1481 | 279.15 | 17.29 | 15.48 | 15.49 | 15.70 | 1.27 |
| 151.5130 | 86.92  | 16.89 | 19.28 | 19.68 | 18.79 | 1.47 |
| 151.5407 | 100.83 | 19.85 | 16.93 | 17.60 | 17.19 | 1.64 |
| 151.5463 | 77.63  | 15.26 | 14.11 | 14.50 | 14.10 | 0.34 |
| 151.6256 | 57.23  | 15.83 | 14.97 | 14.88 | 15.55 | 0.49 |
| 151.9374 | 136.86 | 18.48 | 14.91 | 14.78 | 16.17 | 1.48 |
| 151.9408 | 115.48 | 17.11 | 11.97 | 11.37 | 14.46 | 1.31 |
| 151.9496 | 291.22 | 19.79 | 18.15 | 18.29 | 17.87 | 1.09 |
| 151.9501 | 30.4   | 18.20 | 15.97 | 16.44 | 17.54 | 1.10 |
| 151.9719 | 265.88 | 18.71 | 15.24 | 15.30 | 16.00 | 1.53 |
| 151.9720 | 120.92 | 18.16 | 14.57 | 15.09 | 14.86 | 1.55 |
| 151.9786 | 126.93 | 16.73 | 13.29 | 13.61 | 14.60 | 1.09 |
| 151.9788 | 260.46 | 18.17 | 12.71 | 13.00 | 14.28 | 1.40 |
| 151.9900 | 103.39 | 17.73 | 19.76 | 19.09 | 18.88 | 1.23 |
| 152.0030 | 91.98  | 17.26 | 18.16 | 18.61 | 17.39 | 0.66 |
| 152.0110 | 99.47  | 18.58 | 19.40 | 19.73 | 19.16 | 0.79 |
| 152.0143 | 86.91  | 15.78 | 15.75 | 16.32 | 16.11 | 0.16 |
| 152.0164 | 291.17 | 17.45 | 16.63 | 16.73 | 16.69 | 0.71 |

|          |        |       |       |       |       |      |
|----------|--------|-------|-------|-------|-------|------|
| 152.0193 | 84.78  | 15.12 | 15.51 | 15.27 | 15.70 | 0.27 |
| 152.0221 | 52.34  | 18.90 | 18.45 | 18.82 | 18.32 | 0.42 |
| 152.0319 | 56.89  | 19.02 | 19.10 | 18.99 | 18.90 | 0.00 |
| 152.0371 | 88.89  | 17.23 | 18.09 | 18.32 | 18.68 | 0.71 |
| 152.0421 | 68.5   | 16.54 | 10.62 | 12.59 | 11.99 | 1.20 |
| 152.0514 | 81.55  | 16.59 | 16.98 | 16.74 | 17.30 | 0.27 |
| 152.0566 | 260.57 | 21.73 | 23.84 | 24.43 | 22.86 | 1.41 |
| 152.0626 | 44.6   | 16.65 | 15.32 | 15.33 | 16.00 | 0.48 |
| 152.0705 | 282.84 | 19.99 | 17.75 | 17.51 | 17.73 | 1.26 |
| 152.0738 | 76.8   | 19.07 | 19.41 | 19.46 | 18.83 | 0.28 |
| 152.0782 | 25.82  | 11.91 | 17.59 | 9.17  | 9.49  | 0.37 |
| 152.0818 | 287.55 | 17.95 | 16.88 | 17.16 | 16.86 | 0.82 |
| 152.1012 | 287.63 | 18.30 | 18.26 | 18.14 | 17.56 | 0.13 |
| 152.1070 | 140.65 | 17.41 | 15.55 | 15.82 | 16.08 | 1.44 |
| 152.5037 | 94.71  | 15.55 | 15.48 | 15.81 | 15.31 | 0.03 |
| 152.5134 | 87.96  | 16.49 | 17.15 | 17.28 | 16.53 | 0.56 |
| 152.5403 | 275.86 | 15.34 | 15.58 | 14.20 | 15.84 | 0.12 |
| 152.5403 | 114.26 | 21.29 | 17.27 | 18.48 | 18.07 | 1.68 |
| 152.5530 | 84.82  | 15.69 | 15.66 | 15.77 | 15.37 | 0.03 |
| 152.5845 | 86.83  | 16.63 | 15.85 | 16.21 | 16.52 | 0.50 |
| 152.9747 | 54.4   | 15.52 | 14.89 | 15.76 | 15.50 | 0.17 |
| 152.9814 | 63.82  | 18.44 | 14.10 | 15.14 | 16.05 | 1.28 |
| 152.9876 | 138.52 | 15.75 | 13.63 | 14.08 | 13.83 | 0.64 |
| 152.9913 | 170.46 | 16.26 | 13.58 | 14.42 | 15.67 | 0.70 |
| 152.9949 | 131.99 | 17.93 | 16.26 | 16.99 | 17.29 | 0.97 |
| 153.0009 | 264.88 | 15.61 | 16.12 | 16.59 | 15.79 | 0.34 |
| 153.0010 | 152.6  | 14.88 | 15.35 | 15.65 | 14.97 | 0.25 |
| 153.0061 | 95.48  | 16.77 | 19.26 | 18.93 | 18.31 | 1.31 |
| 153.0111 | 97.03  | 16.29 | 16.56 | 16.68 | 15.21 | 0.06 |
| 153.0222 | 25.04  | 12.38 | 16.10 | 13.13 | 16.48 | 0.88 |
| 153.0323 | 85.45  | 18.29 | 18.38 | 18.74 | 18.86 | 0.30 |
| 153.0354 | 83.75  | 17.40 | 12.30 | 13.61 | 13.49 | 1.38 |
| 153.0407 | 266.63 | 18.46 | 19.92 | 19.67 | 19.23 | 1.09 |
| 153.0407 | 53.42  | 24.87 | 23.27 | 23.33 | 23.91 | 1.14 |
| 153.0540 | 255.34 | 17.22 | 17.14 | 17.02 | 16.13 | 0.31 |
| 153.0600 | 264.75 | 17.04 | 19.40 | 19.67 | 18.20 | 1.39 |
| 153.0658 | 276.02 | 20.33 | 19.09 | 18.19 | 18.94 | 0.87 |
| 153.0738 | 293.06 | 17.01 | 16.56 | 16.51 | 15.75 | 0.42 |
| 153.0772 | 71.61  | 23.41 | 23.99 | 24.00 | 23.34 | 0.44 |
| 153.0909 | 286.53 | 19.12 | 17.37 | 17.40 | 17.42 | 1.18 |
| 153.0909 | 21.15  | 18.04 | 15.58 | 16.00 | 16.60 | 1.64 |
| 153.1022 | 203.39 | 16.67 | 14.24 | 14.77 | 14.84 | 1.61 |
| 153.1273 | 25.08  | 18.32 | 16.65 | 16.74 | 17.15 | 1.39 |
| 153.1273 | 287.31 | 19.35 | 17.71 | 17.81 | 17.80 | 0.95 |
| 153.5206 | 86.01  | 16.24 | 17.12 | 17.40 | 16.88 | 0.88 |
| 153.5413 | 191.96 | 15.42 | 15.56 | 15.70 | 16.79 | 0.16 |
| 153.5474 | 103.57 | 17.49 | 15.62 | 15.71 | 15.71 | 1.09 |
| 153.5569 | 87.79  | 15.40 | 16.69 | 16.40 | 16.44 | 1.00 |
| 153.5724 | 24.54  | 14.77 | 16.52 | 14.84 | 17.69 | 0.59 |
| 153.9484 | 288.6  | 19.21 | 17.27 | 17.62 | 16.94 | 1.18 |
| 153.9591 | 269.42 | 16.56 | 12.89 | 11.16 | 14.15 | 1.04 |
| 153.9683 | 128.41 | 15.16 | 14.46 | 16.20 | 14.96 | 0.01 |
| 153.9869 | 55     | 19.32 | 17.70 | 18.46 | 17.01 | 0.94 |
| 153.9945 | 167    | 14.14 | 13.15 | 13.58 | 14.48 | 0.16 |
| 154.0004 | 130.05 | 15.81 | 17.66 | 14.36 | 16.61 | 0.14 |
| 154.0050 | 254.94 | 19.47 | 16.77 | 16.82 | 17.56 | 1.59 |

|          |        |       |       |       |       |      |
|----------|--------|-------|-------|-------|-------|------|
| 154.0169 | 137.33 | 17.91 | 19.19 | 19.61 | 19.26 | 1.04 |
| 154.0249 | 56.64  | 20.91 | 18.94 | 18.96 | 19.64 | 1.50 |
| 154.0359 | 49.45  | 19.34 | 18.60 | 18.69 | 18.95 | 0.84 |
| 154.0441 | 51.15  | 20.66 | 18.63 | 18.82 | 19.17 | 1.26 |
| 154.0492 | 81.08  | 20.36 | 19.82 | 20.29 | 19.48 | 0.23 |
| 154.0498 | 296.95 | 17.73 | 16.48 | 16.50 | 16.42 | 1.07 |
| 154.0535 | 80.36  | 15.29 | 15.85 | 15.63 | 15.64 | 0.25 |
| 154.0591 | 53.49  | 22.49 | 22.29 | 22.07 | 22.04 | 0.56 |
| 154.0692 | 195.32 | 16.40 | 13.66 | 13.98 | 14.49 | 1.62 |
| 154.0692 | 33.16  | 16.56 | 14.92 | 14.60 | 15.45 | 0.76 |
| 154.0742 | 52.15  | 14.55 | 14.98 | 14.06 | 14.78 | 0.02 |
| 154.0862 | 288.38 | 18.03 | 16.87 | 16.95 | 16.93 | 0.90 |
| 154.0863 | 23.66  | 17.93 | 15.62 | 15.84 | 16.30 | 1.59 |
| 154.1226 | 281.53 | 16.72 | 15.13 | 14.99 | 15.35 | 1.04 |
| 154.1227 | 194.03 | 17.45 | 14.92 | 15.19 | 15.22 | 1.56 |
| 154.1307 | 199.64 | 16.20 | 13.37 | 13.64 | 14.01 | 1.28 |
| 154.1339 | 195.84 | 16.31 | 14.30 | 14.90 | 14.83 | 1.32 |
| 154.4973 | 86.58  | 16.66 | 13.20 | 14.75 | 13.07 | 1.03 |
| 154.5226 | 86.9   | 15.28 | 18.21 | 18.43 | 17.17 | 1.07 |
| 154.5365 | 84.25  | 16.63 | 10.55 | 12.36 | 12.68 | 1.43 |
| 154.5508 | 106.72 | 16.86 | 14.86 | 14.58 | 14.91 | 1.20 |
| 154.8803 | 48.22  | 14.66 | 13.73 | 14.26 | 13.98 | 0.39 |
| 154.9416 | 279.66 | 23.65 | 21.71 | 22.48 | 22.33 | 0.68 |
| 154.9659 | 29.29  | 14.54 | 11.47 | 15.83 | 12.54 | 0.40 |
| 154.9668 | 299.77 | 18.28 | 15.15 | 13.59 | 15.92 | 1.44 |
| 154.9692 | 49.23  | 14.38 | 13.85 | 15.02 | 14.45 | 0.00 |
| 154.9762 | 132.65 | 15.22 | 14.57 | 16.05 | 13.68 | 0.12 |
| 154.9902 | 276.54 | 22.58 | 18.38 | 17.37 | 19.94 | 1.59 |
| 154.9987 | 71.84  | 16.19 | 14.22 | 14.61 | 15.56 | 0.53 |
| 155.0025 | 185.94 | 11.53 | 12.56 | 12.59 | 13.00 | 0.31 |
| 155.0109 | 123.23 | 18.21 | 17.29 | 17.98 | 17.52 | 0.47 |
| 155.0205 | 93.29  | 16.52 | 18.44 | 18.73 | 17.75 | 1.46 |
| 155.0243 | 87.6   | 14.74 | 15.95 | 15.70 | 15.10 | 0.65 |
| 155.0287 | 54.14  | 16.37 | 16.01 | 14.59 | 15.72 | 0.37 |
| 155.0435 | 63.4   | 18.13 | 15.57 | 14.87 | 15.58 | 1.44 |
| 155.0559 | 52.06  | 16.95 | 14.70 | 13.53 | 15.72 | 0.85 |
| 155.0620 | 55.68  | 17.78 | 17.33 | 16.84 | 17.19 | 0.80 |
| 155.0702 | 285.26 | 17.87 | 16.03 | 15.97 | 16.30 | 1.27 |
| 155.0751 | 45.36  | 18.44 | 16.36 | 16.49 | 16.40 | 1.52 |
| 155.0814 | 277.24 | 20.57 | 18.33 | 18.02 | 19.08 | 1.06 |
| 155.0910 | 276.96 | 16.98 | 16.38 | 16.47 | 16.14 | 0.52 |
| 155.1066 | 284.99 | 18.97 | 17.46 | 17.28 | 17.36 | 1.10 |
| 155.1066 | 20.79  | 18.06 | 15.57 | 15.84 | 16.12 | 1.65 |
| 155.1430 | 204.07 | 16.37 | 12.80 | 13.57 | 14.35 | 1.59 |
| 155.5036 | 249.96 | 18.25 | 18.52 | 19.14 | 18.48 | 0.44 |
| 155.5207 | 84.63  | 17.94 | 15.23 | 14.34 | 15.65 | 1.24 |
| 155.5258 | 81.43  | 16.41 | 16.39 | 16.23 | 16.42 | 0.07 |
| 155.5305 | 123.42 | 14.21 | 14.56 | 13.99 | 13.83 | 0.01 |
| 155.9629 | 121.11 | 17.21 | 14.47 | 14.98 | 13.98 | 1.24 |
| 155.9857 | 39.66  | 19.02 | 11.96 | 13.60 | 14.17 | 1.58 |
| 155.9906 | 169.52 | 16.36 | 8.46  | 8.42  | 11.11 | 1.70 |
| 156.0018 | 30.42  | 15.17 | 13.17 | 16.94 | 16.46 | 0.04 |
| 156.0053 | 158.57 | 14.02 | 14.20 | 14.24 | 14.07 | 0.07 |
| 156.0194 | 37.99  | 16.84 | 12.93 | 16.03 | 15.47 | 0.65 |
| 156.0364 | 102.02 | 17.42 | 13.09 | 13.53 | 14.68 | 1.23 |
| 156.0421 | 50.59  | 25.19 | 25.33 | 25.22 | 25.30 | 0.14 |

|          |        |       |       |       |       |      |
|----------|--------|-------|-------|-------|-------|------|
| 156.0506 | 28.87  | 13.27 | 12.43 | 15.55 | 13.47 | 0.22 |
| 156.0655 | 284.27 | 18.95 | 17.75 | 17.68 | 17.35 | 0.67 |
| 156.0722 | 55.48  | 24.51 | 23.76 | 24.00 | 23.36 | 0.64 |
| 156.0768 | 74.84  | 26.31 | 25.73 | 25.89 | 26.02 | 0.77 |
| 156.0848 | 212.86 | 16.63 | 13.74 | 13.90 | 14.75 | 1.50 |
| 156.1018 | 286.69 | 18.10 | 17.24 | 17.28 | 17.08 | 0.73 |
| 156.1383 | 167.91 | 16.88 | 15.60 | 15.31 | 15.22 | 1.23 |
| 156.5071 | 29.97  | 14.63 | 17.17 | 18.11 | 17.45 | 1.63 |
| 156.5185 | 90.81  | 22.01 | 18.99 | 18.38 | 20.30 | 1.66 |
| 156.5245 | 87.81  | 15.58 | 15.99 | 15.49 | 15.82 | 0.17 |
| 156.5385 | 72.3   | 15.83 | 15.62 | 16.19 | 14.85 | 0.05 |
| 156.5926 | 97.05  | 13.02 | 16.00 | 14.88 | 15.22 | 0.72 |
| 156.8452 | 42.95  | 16.19 | 17.28 | 17.46 | 17.75 | 1.36 |
| 156.8854 | 100.57 | 15.35 | 14.90 | 13.66 | 15.21 | 0.72 |
| 156.9378 | 116.14 | 16.96 | 14.23 | 15.73 | 14.36 | 1.19 |
| 156.9460 | 123.21 | 17.65 | 15.47 | 16.87 | 15.81 | 1.20 |
| 156.9660 | 290.07 | 17.01 | 9.50  | 9.24  | 13.58 | 1.68 |
| 156.9696 | 142.12 | 17.53 | 12.32 | 12.98 | 14.51 | 1.60 |
| 156.9748 | 93.25  | 18.45 | 20.67 | 21.27 | 20.03 | 1.26 |
| 156.9796 | 26.05  | 18.73 | 15.50 | 18.23 | 17.67 | 1.04 |
| 156.9840 | 254.81 | 20.81 | 17.20 | 16.98 | 17.53 | 1.61 |
| 156.9906 | 162.44 | 17.48 | 12.60 | 12.13 | 15.73 | 1.50 |
| 156.9940 | 89.1   | 13.04 | 15.98 | 15.98 | 15.38 | 1.06 |
| 157.0095 | 35.83  | 18.33 | 12.65 | 14.20 | 15.48 | 1.23 |
| 157.0205 | 113.97 | 18.79 | 15.52 | 15.99 | 15.91 | 1.63 |
| 157.0346 | 87.29  | 15.02 | 14.73 | 14.97 | 14.97 | 0.11 |
| 157.0392 | 49.71  | 17.12 | 15.93 | 16.02 | 16.29 | 1.01 |
| 157.0453 | 59.4   | 20.82 | 21.13 | 21.04 | 20.93 | 0.35 |
| 157.0496 | 211.2  | 16.67 | 14.56 | 14.94 | 14.86 | 1.54 |
| 157.0498 | 28.24  | 17.06 | 18.78 | 19.06 | 19.20 | 1.37 |
| 157.0608 | 176.45 | 16.59 | 16.80 | 15.43 | 14.60 | 0.42 |
| 157.0689 | 204.49 | 15.98 | 12.54 | 13.40 | 13.72 | 1.18 |
| 157.0735 | 66.78  | 19.77 | 18.95 | 19.19 | 19.04 | 1.17 |
| 157.0801 | 79.92  | 22.38 | 21.87 | 22.08 | 21.93 | 0.78 |
| 157.0834 | 38.63  | 16.81 | 16.81 | 15.73 | 16.67 | 0.24 |
| 157.0855 | 232.5  | 17.98 | 15.87 | 15.98 | 16.63 | 1.63 |
| 157.0971 | 286.56 | 16.71 | 15.61 | 15.58 | 15.92 | 0.74 |
| 157.0972 | 151.7  | 17.83 | 16.26 | 16.26 | 17.04 | 1.24 |
| 157.1011 | 23.76  | 17.17 | 14.44 | 14.77 | 15.82 | 1.44 |
| 157.1012 | 186.62 | 16.60 | 13.68 | 14.05 | 14.36 | 1.67 |
| 157.1084 | 73.79  | 16.97 | 16.56 | 17.09 | 17.00 | 0.17 |
| 157.1222 | 22.52  | 17.14 | 14.47 | 14.39 | 15.02 | 1.76 |
| 157.1222 | 286.77 | 18.02 | 16.81 | 16.79 | 16.77 | 0.99 |
| 157.1336 | 32.11  | 15.40 | 13.83 | 13.24 | 13.56 | 1.03 |
| 157.4444 | 108.75 | 14.84 | 12.59 | 14.38 | 12.94 | 0.45 |
| 157.5072 | 99.12  | 16.93 | 14.67 | 15.12 | 15.64 | 1.11 |
| 157.5190 | 83.01  | 18.49 | 15.70 | 15.91 | 16.09 | 1.49 |
| 157.5373 | 27.68  | 13.29 | 17.13 | 16.03 | 16.39 | 1.43 |
| 157.5374 | 273.83 | 18.31 | 21.14 | 21.30 | 20.37 | 1.07 |
| 157.5464 | 59.49  | 16.15 | 14.35 | 15.99 | 15.06 | 0.59 |
| 157.5549 | 137.48 | 16.09 | 14.22 | 14.29 | 13.90 | 1.20 |
| 157.9754 | 88     | 16.59 | 16.87 | 17.58 | 16.83 | 0.44 |
| 157.9810 | 70.06  | 18.60 | 15.36 | 14.22 | 15.51 | 1.15 |
| 157.9944 | 32.94  | 14.77 | 13.23 | 16.31 | 14.39 | 0.08 |
| 158.0028 | 302.04 | 18.35 | 17.93 | 17.16 | 18.00 | 0.57 |
| 158.0175 | 90.59  | 18.31 | 12.95 | 14.82 | 13.14 | 1.33 |



|          |        |       |       |       |       |      |
|----------|--------|-------|-------|-------|-------|------|
| 158.0393 | 61.11  | 21.95 | 21.54 | 21.53 | 21.51 | 0.42 |
| 158.0449 | 172.22 | 16.46 | 11.68 | 12.56 | 13.33 | 1.76 |
| 158.0463 | 46.24  | 16.80 | 16.00 | 16.11 | 16.05 | 0.62 |
| 158.0563 | 78.69  | 16.20 | 16.40 | 16.39 | 16.30 | 0.13 |
| 158.0633 | 199.41 | 16.09 | 13.36 | 13.78 | 13.59 | 1.19 |
| 158.0680 | 116.59 | 13.74 | 14.87 | 11.30 | 14.26 | 0.10 |
| 158.0767 | 58.13  | 16.85 | 17.34 | 17.00 | 17.34 | 0.24 |
| 158.0964 | 152.34 | 17.66 | 15.86 | 16.45 | 16.68 | 1.22 |
| 158.0997 | 206.62 | 16.09 | 13.02 | 13.80 | 13.46 | 1.19 |
| 158.1176 | 166.52 | 18.59 | 19.79 | 18.40 | 19.79 | 0.35 |
| 158.1288 | 60.16  | 15.57 | 14.42 | 14.41 | 14.17 | 0.70 |
| 158.1539 | 24.31  | 18.28 | 17.54 | 17.30 | 17.47 | 0.72 |
| 158.1539 | 287.44 | 19.39 | 18.87 | 18.32 | 18.39 | 0.46 |
| 158.4609 | 107.33 | 15.69 | 12.81 | 14.31 | 12.76 | 0.89 |
| 158.5163 | 97.23  | 17.45 | 11.64 | 12.14 | 13.41 | 1.91 |
| 158.5359 | 85.76  | 18.66 | 18.82 | 18.33 | 18.43 | 0.08 |
| 158.5395 | 95.51  | 18.41 | 13.99 | 14.73 | 14.36 | 1.26 |
| 158.5538 | 83.77  | 16.78 | 16.64 | 16.15 | 17.09 | 0.21 |
| 158.5646 | 24.49  | 15.63 | 15.91 | 14.46 | 17.29 | 0.03 |
| 158.8437 | 43.44  | 18.32 | 18.23 | 18.39 | 18.47 | 0.02 |
| 158.9220 | 97.72  | 16.02 | 20.16 | 18.36 | 19.37 | 1.37 |
| 158.9278 | 268.69 | 16.72 | 8.25  | 9.05  | 10.43 | 1.68 |
| 158.9346 | 254.49 | 17.96 | 16.13 | 16.17 | 16.43 | 1.27 |
| 158.9614 | 299.55 | 21.17 | 17.59 | 16.56 | 19.38 | 1.21 |
| 158.9723 | 87.68  | 17.12 | 17.06 | 17.85 | 17.02 | 0.24 |
| 158.9810 | 252.82 | 19.15 | 15.41 | 15.18 | 15.43 | 1.50 |
| 158.9811 | 151.07 | 18.90 | 17.03 | 17.64 | 17.74 | 1.10 |
| 158.9965 | 99.16  | 17.31 | 15.28 | 15.65 | 15.98 | 1.43 |
| 159.0008 | 274.69 | 20.86 | 21.28 | 21.58 | 21.32 | 0.41 |
| 159.0074 | 20.41  | 16.17 | 14.57 | 18.07 | 16.42 | 0.00 |
| 159.0164 | 94.53  | 17.40 | 16.22 | 16.52 | 16.79 | 0.79 |
| 159.0172 | 22.03  | 15.47 | 13.67 | 14.88 | 14.50 | 0.80 |
| 159.0273 | 59.11  | 22.08 | 21.36 | 22.06 | 21.78 | 0.31 |
| 159.0361 | 80.33  | 17.21 | 16.52 | 16.55 | 16.47 | 0.60 |
| 159.0436 | 47.7   | 17.10 | 15.91 | 15.98 | 16.26 | 1.04 |
| 159.0512 | 49.8   | 17.09 | 16.20 | 16.56 | 16.91 | 0.37 |
| 159.0547 | 31.23  | 16.53 | 17.58 | 16.89 | 17.32 | 0.52 |
| 159.0653 | 157.77 | 16.67 | 14.07 | 13.80 | 14.98 | 1.64 |
| 159.0765 | 163.97 | 17.53 | 20.60 | 17.81 | 20.65 | 0.80 |
| 159.0804 | 204.48 | 16.42 | 13.29 | 14.10 | 13.77 | 1.23 |
| 159.0844 | 286.6  | 18.07 | 16.31 | 16.03 | 16.43 | 1.26 |
| 159.0918 | 39.94  | 19.97 | 18.78 | 19.22 | 19.11 | 1.36 |
| 159.0958 | 74.06  | 15.81 | 14.80 | 15.17 | 15.51 | 0.60 |
| 159.1127 | 284.21 | 20.55 | 19.47 | 19.25 | 19.61 | 0.65 |
| 159.1167 | 23.84  | 18.08 | 15.32 | 16.27 | 16.98 | 1.46 |
| 159.1168 | 181.35 | 17.75 | 15.19 | 15.53 | 15.91 | 1.51 |
| 159.1209 | 56.27  | 19.72 | 18.17 | 19.53 | 18.82 | 0.81 |
| 159.1573 | 193.88 | 16.35 | 14.36 | 14.57 | 14.90 | 1.61 |
| 159.5025 | 277.52 | 16.40 | 16.91 | 16.82 | 16.79 | 0.29 |
| 159.5026 | 91.11  | 16.51 | 15.85 | 15.88 | 15.83 | 0.55 |
| 159.5526 | 28.62  | 16.96 | 19.65 | 20.38 | 20.16 | 1.65 |
| 159.9470 | 275.7  | 21.96 | 22.10 | 22.32 | 21.60 | 0.15 |
| 159.9471 | 27.76  | 14.99 | 17.82 | 18.09 | 17.36 | 1.69 |
| 159.9691 | 298.33 | 18.94 | 15.68 | 14.82 | 16.82 | 1.40 |
| 160.0175 | 86.23  | 17.64 | 21.70 | 21.89 | 20.87 | 1.62 |
| 160.0255 | 77.91  | 19.00 | 15.58 | 15.53 | 16.16 | 1.46 |

|          |        |       |       |       |       |      |
|----------|--------|-------|-------|-------|-------|------|
| 160.0311 | 47.59  | 17.87 | 16.07 | 16.70 | 16.74 | 0.88 |
| 160.0341 | 198.63 | 15.10 | 16.45 | 16.74 | 16.74 | 0.74 |
| 160.0402 | 93.9   | 17.87 | 10.55 | 12.84 | 12.73 | 1.37 |
| 160.0440 | 96.26  | 17.66 | 13.97 | 14.69 | 14.89 | 1.31 |
| 160.0543 | 29.19  | 14.53 | 15.25 | 16.39 | 16.53 | 0.71 |
| 160.0604 | 279.25 | 22.29 | 21.21 | 20.29 | 21.47 | 0.65 |
| 160.0700 | 211.59 | 16.12 | 11.49 | 11.41 | 12.50 | 1.27 |
| 160.0757 | 30.41  | 22.72 | 23.49 | 23.85 | 23.50 | 0.69 |
| 160.0795 | 177.18 | 16.44 | 15.06 | 14.66 | 15.78 | 1.33 |
| 160.0879 | 207.1  | 16.62 | 13.34 | 13.87 | 13.82 | 1.27 |
| 160.0968 | 262.26 | 23.06 | 20.48 | 20.27 | 20.74 | 1.15 |
| 160.1064 | 209.37 | 16.35 | 14.35 | 14.70 | 14.35 | 1.20 |
| 160.1161 | 169.27 | 17.17 | 14.89 | 14.77 | 15.70 | 1.51 |
| 160.1332 | 50.97  | 27.55 | 27.39 | 27.69 | 27.56 | 0.02 |
| 160.1695 | 24.03  | 16.69 | 14.03 | 14.62 | 15.20 | 1.23 |
| 160.1808 | 30.91  | 17.16 | 14.91 | 14.79 | 15.77 | 1.28 |
| 160.4971 | 32.99  | 11.66 | 12.14 | 16.57 | 14.97 | 0.65 |
| 160.5023 | 111.11 | 18.66 | 17.45 | 18.40 | 17.57 | 0.56 |
| 160.5178 | 86.63  | 15.84 | 17.99 | 18.09 | 17.52 | 1.45 |
| 160.5221 | 195.77 | 11.89 | 14.38 | 14.90 | 15.32 | 1.06 |
| 160.5267 | 102.06 | 17.83 | 10.21 | 10.55 | 14.19 | 1.25 |
| 160.5363 | 79.51  | 16.65 | 15.30 | 15.33 | 14.59 | 0.60 |
| 160.5419 | 88.8   | 16.93 | 12.38 | 13.92 | 13.25 | 1.40 |
| 160.5801 | 24.76  | 14.35 | 16.15 | 13.72 | 16.39 | 0.44 |
| 160.8412 | 44.97  | 17.42 | 16.32 | 16.46 | 16.71 | 1.40 |
| 160.9202 | 109.86 | 12.70 | 13.62 | 10.72 | 13.98 | 0.05 |
| 160.9505 | 102.19 | 17.59 | 15.22 | 16.21 | 15.38 | 1.28 |
| 160.9645 | 36.88  | 20.94 | 16.23 | 16.30 | 18.13 | 1.98 |
| 160.9712 | 31.75  | 17.17 | 12.33 | 12.80 | 13.53 | 1.90 |
| 160.9771 | 265.4  | 17.74 | 15.17 | 15.07 | 15.66 | 1.16 |
| 160.9909 | 26.68  | 16.28 | 19.66 | 14.96 | 15.20 | 0.47 |
| 160.9998 | 95.51  | 17.13 | 15.84 | 16.61 | 16.15 | 0.79 |
| 161.0086 | 92.99  | 13.42 | 17.79 | 18.11 | 16.63 | 1.47 |
| 161.0123 | 28.67  | 14.37 | 17.43 | 17.44 | 17.40 | 1.49 |
| 161.0163 | 86.69  | 15.49 | 18.50 | 18.68 | 17.91 | 1.55 |
| 161.0194 | 80     | 15.36 | 15.68 | 15.90 | 15.60 | 0.36 |
| 161.0231 | 86.5   | 18.02 | 12.22 | 12.57 | 14.62 | 1.74 |
| 161.0378 | 62.79  | 16.61 | 10.84 | 11.87 | 12.72 | 1.15 |
| 161.0404 | 49.84  | 16.83 | 15.84 | 15.52 | 14.29 | 0.58 |
| 161.0463 | 39.15  | 15.76 | 14.77 | 15.11 | 14.59 | 0.48 |
| 161.0567 | 87.03  | 21.72 | 23.20 | 23.31 | 23.41 | 1.20 |
| 161.0597 | 20.69  | 16.31 | 14.93 | 13.09 | 14.38 | 1.12 |
| 161.0597 | 165.42 | 17.69 | 17.42 | 15.64 | 16.59 | 0.71 |
| 161.0637 | 285.99 | 19.11 | 17.37 | 17.19 | 17.83 | 1.04 |
| 161.0710 | 168.39 | 17.56 | 15.01 | 15.21 | 15.87 | 1.56 |
| 161.0798 | 38.87  | 19.47 | 20.05 | 20.49 | 19.99 | 0.53 |
| 161.0912 | 286.89 | 18.74 | 16.82 | 16.88 | 16.86 | 1.20 |
| 161.0960 | 22.56  | 17.22 | 14.60 | 15.53 | 16.22 | 1.56 |
| 161.0960 | 296.74 | 17.68 | 16.64 | 16.72 | 16.62 | 0.78 |
| 161.1001 | 291.63 | 18.64 | 16.69 | 16.49 | 16.78 | 1.17 |
| 161.1324 | 274.91 | 18.85 | 16.46 | 16.20 | 17.11 | 1.34 |
| 161.1365 | 43.3   | 23.70 | 23.95 | 24.33 | 23.89 | 0.44 |
| 161.1395 | 40.44  | 17.95 | 17.34 | 16.78 | 17.52 | 0.48 |
| 161.1648 | 46.08  | 17.71 | 15.27 | 13.70 | 16.74 | 1.20 |
| 161.5036 | 267.23 | 17.49 | 17.44 | 17.55 | 17.62 | 0.01 |
| 161.5093 | 114.81 | 17.09 | 17.70 | 17.02 | 17.13 | 0.29 |

|          |        |       |       |       |       |      |
|----------|--------|-------|-------|-------|-------|------|
| 161.5188 | 87.73  | 15.02 | 20.40 | 20.54 | 19.05 | 1.59 |
| 161.5392 | 32.11  | 15.03 | 15.33 | 16.43 | 15.80 | 0.33 |
| 161.5576 | 84.71  | 18.29 | 19.83 | 20.05 | 20.11 | 1.25 |
| 161.9628 | 101.12 | 18.60 | 16.72 | 17.57 | 16.96 | 1.52 |
| 161.9802 | 91.14  | 21.74 | 24.60 | 24.92 | 23.98 | 1.30 |
| 161.9871 | 280.49 | 17.14 | 16.08 | 15.91 | 15.84 | 0.96 |
| 162.0073 | 296.12 | 19.25 | 15.82 | 16.04 | 16.60 | 1.50 |
| 162.0110 | 104.68 | 19.35 | 22.13 | 21.54 | 20.79 | 1.25 |
| 162.0200 | 77.38  | 20.41 | 20.90 | 21.00 | 20.26 | 0.42 |
| 162.0218 | 196.42 | 16.80 | 17.76 | 18.49 | 18.27 | 1.08 |
| 162.0398 | 68.72  | 16.50 | 14.72 | 15.38 | 15.84 | 0.90 |
| 162.0549 | 267.07 | 18.48 | 16.62 | 16.36 | 16.91 | 1.58 |
| 162.0553 | 85.59  | 18.89 | 20.23 | 20.41 | 20.52 | 1.18 |
| 162.0587 | 57.38  | 18.94 | 19.60 | 19.71 | 18.01 | 0.25 |
| 162.0672 | 159.62 | 17.37 | 13.72 | 13.88 | 15.15 | 1.55 |
| 162.0760 | 276.75 | 22.79 | 21.42 | 21.26 | 21.61 | 0.82 |
| 162.0914 | 204.41 | 16.80 | 13.42 | 13.76 | 14.45 | 1.41 |
| 162.1036 | 154.77 | 19.08 | 16.36 | 16.77 | 17.18 | 1.58 |
| 162.1125 | 64.92  | 29.95 | 29.51 | 29.91 | 29.88 | 0.51 |
| 162.1399 | 38.72  | 20.27 | 19.85 | 20.34 | 19.83 | 0.25 |
| 162.4953 | 106.4  | 18.02 | 12.16 | 12.93 | 13.25 | 1.87 |
| 162.5115 | 184.32 | 14.31 | 14.61 | 14.69 | 13.51 | 0.06 |
| 162.5154 | 84.1   | 15.17 | 14.80 | 13.93 | 15.32 | 0.43 |
| 162.5200 | 268.89 | 17.14 | 17.49 | 17.53 | 17.51 | 0.26 |
| 162.5287 | 43.04  | 17.72 | 16.02 | 18.56 | 17.39 | 0.34 |
| 162.5337 | 76.16  | 16.39 | 9.19  | 11.02 | 10.73 | 1.65 |
| 162.5377 | 219.69 | 15.87 | 12.66 | 14.61 | 15.87 | 0.60 |
| 162.5571 | 84.52  | 16.58 | 15.98 | 16.44 | 16.84 | 0.24 |
| 162.5651 | 26.59  | 15.62 | 19.45 | 13.43 | 13.75 | 0.28 |
| 162.9473 | 94.91  | 17.13 | 11.02 | 14.51 | 11.13 | 1.05 |
| 162.9557 | 85.08  | 15.74 | 16.53 | 16.53 | 15.89 | 0.60 |
| 162.9675 | 26.14  | 15.96 | 14.80 | 16.31 | 15.29 | 0.34 |
| 162.9737 | 128.11 | 16.46 | 14.34 | 15.03 | 15.01 | 0.99 |
| 162.9809 | 90.34  | 18.56 | 21.55 | 21.99 | 20.88 | 1.37 |
| 162.9834 | 86.59  | 13.98 | 17.90 | 18.86 | 17.69 | 1.31 |
| 163.0030 | 27.46  | 15.90 | 15.70 | 18.02 | 16.24 | 0.42 |
| 163.0099 | 85     | 18.29 | 16.67 | 17.76 | 17.19 | 0.64 |
| 163.0130 | 103.23 | 15.77 | 14.82 | 14.21 | 14.74 | 0.74 |
| 163.0266 | 70.92  | 16.59 | 18.40 | 18.59 | 17.89 | 1.20 |
| 163.0393 | 215    | 16.95 | 16.38 | 17.19 | 17.36 | 0.06 |
| 163.0430 | 75.89  | 14.23 | 14.93 | 15.14 | 15.02 | 0.36 |
| 163.0457 | 299.19 | 16.37 | 13.45 | 12.69 | 15.16 | 1.38 |
| 163.0502 | 198.6  | 16.38 | 13.79 | 13.83 | 14.57 | 1.48 |
| 163.0535 | 49.52  | 17.90 | 15.71 | 16.12 | 16.34 | 1.31 |
| 163.0611 | 237.29 | 16.57 | 16.89 | 16.74 | 16.32 | 0.24 |
| 163.0616 | 43.67  | 18.92 | 20.22 | 20.46 | 17.14 | 0.39 |
| 163.0715 | 65.57  | 17.73 | 17.45 | 17.24 | 17.47 | 0.31 |
| 163.0753 | 288.35 | 18.45 | 17.39 | 17.54 | 17.38 | 0.71 |
| 163.0794 | 273.36 | 19.73 | 17.44 | 16.74 | 18.04 | 1.37 |
| 163.0839 | 141.97 | 17.70 | 20.89 | 20.85 | 20.15 | 1.25 |
| 163.0865 | 280.49 | 17.17 | 15.38 | 15.11 | 15.74 | 1.10 |
| 163.0866 | 23.57  | 16.97 | 14.02 | 13.84 | 14.89 | 1.56 |
| 163.1098 | 285.04 | 15.77 | 13.76 | 14.47 | 13.68 | 0.84 |
| 163.1157 | 61.54  | 26.13 | 25.72 | 26.32 | 26.22 | 0.20 |
| 163.1328 | 289.23 | 17.58 | 16.76 | 16.68 | 16.94 | 0.81 |
| 163.1480 | 23.68  | 17.85 | 15.43 | 16.07 | 17.02 | 1.49 |

|          |        |       |       |       |       |      |
|----------|--------|-------|-------|-------|-------|------|
| 163.1481 | 288.09 | 17.93 | 16.33 | 16.54 | 16.56 | 1.17 |
| 163.4966 | 29.94  | 12.61 | 10.64 | 16.32 | 15.08 | 0.24 |
| 163.5145 | 71.02  | 15.89 | 15.08 | 16.67 | 15.82 | 0.05 |
| 163.5192 | 133.43 | 18.11 | 16.61 | 17.04 | 16.76 | 1.21 |
| 163.5278 | 91.24  | 15.66 | 16.03 | 15.98 | 15.59 | 0.24 |
| 163.5411 | 221.34 | 13.02 | 14.57 | 15.40 | 15.64 | 0.58 |
| 163.5462 | 66.12  | 16.98 | 15.17 | 16.15 | 15.55 | 0.80 |
| 163.5856 | 130.41 | 13.90 | 17.45 | 17.40 | 16.72 | 1.34 |
| 163.9400 | 102.2  | 17.53 | 15.01 | 16.01 | 15.28 | 1.38 |
| 163.9470 | 112.79 | 13.60 | 10.30 | 13.94 | 11.92 | 0.43 |
| 163.9688 | 74.89  | 20.15 | 20.36 | 21.03 | 20.36 | 0.33 |
| 163.9777 | 72.56  | 24.86 | 24.46 | 24.59 | 24.42 | 0.67 |
| 163.9844 | 103.41 | 17.38 | 17.23 | 17.62 | 17.34 | 0.01 |
| 163.9905 | 20.64  | 18.40 | 10.00 | 10.59 | 12.69 | 1.95 |
| 163.9958 | 95.2   | 15.49 | 14.58 | 15.47 | 14.91 | 0.31 |
| 164.0077 | 88.2   | 19.38 | 22.66 | 21.54 | 21.83 | 1.56 |
| 164.0131 | 125.27 | 18.20 | 14.42 | 15.12 | 14.85 | 1.81 |
| 164.0177 | 62.63  | 16.33 | 15.22 | 15.08 | 14.97 | 0.66 |
| 164.0293 | 60.97  | 17.26 | 14.44 | 16.39 | 15.17 | 0.76 |
| 164.0297 | 298.38 | 15.32 | 12.77 | 12.13 | 14.04 | 1.04 |
| 164.0515 | 86.11  | 15.06 | 15.50 | 15.64 | 15.39 | 0.56 |
| 164.0558 | 72.68  | 18.48 | 18.15 | 18.04 | 17.54 | 0.38 |
| 164.0662 | 24.73  | 12.80 | 14.16 | 14.93 | 13.59 | 0.81 |
| 164.0706 | 279.49 | 17.53 | 15.62 | 15.80 | 16.24 | 1.11 |
| 164.0822 | 278.73 | 17.98 | 15.70 | 15.48 | 16.10 | 1.31 |
| 164.0828 | 169.82 | 18.79 | 15.75 | 15.16 | 16.24 | 1.69 |
| 164.0916 | 287.23 | 21.05 | 19.94 | 19.88 | 20.69 | 0.51 |
| 164.1012 | 292.77 | 17.17 | 16.86 | 17.12 | 15.67 | 0.26 |
| 164.1070 | 179.32 | 17.06 | 14.70 | 14.84 | 14.76 | 1.60 |
| 164.1111 | 127.33 | 15.30 | 17.36 | 17.28 | 16.80 | 1.00 |
| 164.1128 | 40.74  | 17.50 | 15.98 | 16.47 | 16.46 | 1.01 |
| 164.1177 | 64.41  | 22.64 | 22.52 | 23.20 | 22.75 | 0.29 |
| 164.1281 | 198.64 | 15.99 | 14.11 | 14.36 | 14.85 | 1.20 |
| 164.1281 | 21.78  | 15.69 | 12.38 | 12.17 | 12.95 | 1.55 |
| 164.5088 | 254.14 | 16.99 | 17.87 | 18.52 | 17.84 | 0.89 |
| 164.5262 | 106.55 | 16.25 | 15.54 | 15.53 | 15.28 | 0.54 |
| 164.5310 | 83.96  | 18.17 | 22.37 | 22.41 | 21.54 | 1.86 |
| 164.5662 | 115.58 | 13.94 | 14.75 | 14.76 | 14.63 | 0.55 |
| 164.9300 | 108.56 | 13.78 | 16.42 | 12.24 | 15.74 | 0.27 |
| 164.9351 | 40.3   | 18.72 | 20.58 | 20.83 | 20.88 | 1.39 |
| 164.9772 | 53.76  | 17.26 | 15.27 | 16.12 | 15.48 | 1.32 |
| 164.9821 | 60.01  | 19.45 | 17.81 | 18.58 | 17.99 | 1.43 |
| 165.0008 | 276.46 | 17.63 | 19.10 | 19.73 | 18.77 | 1.35 |
| 165.0070 | 30.99  | 13.43 | 14.18 | 17.10 | 15.62 | 0.69 |
| 165.0129 | 72.4   | 18.44 | 16.79 | 15.90 | 16.19 | 1.04 |
| 165.0313 | 85.98  | 15.28 | 18.38 | 18.56 | 17.68 | 1.55 |
| 165.0509 | 86.16  | 14.99 | 16.28 | 16.31 | 16.62 | 0.73 |
| 165.0546 | 54.39  | 24.54 | 23.79 | 24.11 | 23.79 | 1.05 |
| 165.0659 | 158.46 | 17.62 | 15.08 | 15.31 | 16.19 | 1.65 |
| 165.0909 | 23.11  | 17.70 | 15.03 | 15.85 | 16.00 | 1.68 |
| 165.0909 | 292.97 | 18.21 | 16.89 | 17.00 | 17.03 | 0.90 |
| 165.0951 | 168.7  | 18.28 | 15.47 | 15.05 | 15.99 | 1.62 |
| 165.1024 | 182.43 | 16.89 | 14.01 | 14.42 | 15.09 | 1.63 |
| 165.1199 | 40.6   | 18.01 | 16.99 | 17.82 | 17.55 | 0.85 |
| 165.1225 | 217.86 | 15.40 | 10.33 | 10.77 | 10.15 | 1.30 |
| 165.1273 | 21.83  | 17.40 | 14.43 | 15.47 | 15.72 | 1.68 |

|          |        |       |       |       |       |      |
|----------|--------|-------|-------|-------|-------|------|
| 165.1273 | 289.67 | 17.66 | 16.78 | 16.81 | 16.69 | 0.52 |
| 165.1637 | 23.09  | 16.41 | 12.37 | 13.38 | 14.04 | 1.73 |
| 165.1638 | 178.75 | 17.15 | 14.42 | 14.63 | 15.23 | 1.73 |
| 165.5130 | 94.62  | 12.45 | 15.01 | 15.23 | 14.22 | 0.86 |
| 165.5236 | 84.87  | 17.64 | 12.77 | 11.58 | 15.27 | 1.61 |
| 165.5299 | 86.2   | 16.34 | 19.86 | 19.99 | 19.14 | 1.85 |
| 165.5338 | 82.9   | 16.93 | 18.05 | 18.30 | 17.96 | 1.00 |
| 165.5438 | 71.81  | 16.45 | 14.99 | 16.59 | 15.68 | 0.45 |
| 165.5529 | 84.98  | 15.78 | 17.67 | 17.21 | 16.73 | 1.28 |
| 165.5723 | 24.41  | 14.22 | 14.25 | 12.30 | 16.07 | 0.17 |
| 165.9661 | 46.96  | 18.03 | 15.36 | 17.01 | 15.25 | 0.91 |
| 165.9748 | 65.69  | 21.56 | 20.81 | 21.31 | 20.78 | 0.88 |
| 165.9828 | 280.01 | 20.42 | 17.13 | 16.63 | 17.99 | 1.36 |
| 165.9829 | 164.53 | 18.39 | 15.78 | 15.27 | 17.09 | 1.32 |
| 165.9910 | 185.46 | 18.19 | 13.95 | 13.59 | 15.59 | 1.65 |
| 165.9992 | 87.12  | 11.51 | 11.65 | 14.89 | 13.41 | 0.47 |
| 166.0019 | 83.72  | 16.45 | 17.72 | 17.50 | 17.63 | 1.08 |
| 166.0335 | 76.9   | 13.25 | 15.15 | 15.04 | 16.35 | 0.87 |
| 166.0499 | 285.13 | 17.92 | 16.50 | 16.53 | 16.43 | 0.97 |
| 166.0579 | 62.23  | 21.03 | 20.26 | 20.68 | 20.21 | 0.95 |
| 166.0627 | 85.59  | 17.84 | 18.16 | 18.11 | 17.69 | 0.36 |
| 166.0724 | 50.18  | 18.76 | 18.47 | 18.52 | 18.52 | 0.38 |
| 166.0806 | 205.91 | 15.90 | 9.78  | 10.71 | 9.46  | 1.47 |
| 166.0841 | 50.19  | 20.94 | 22.29 | 20.82 | 20.97 | 0.41 |
| 166.0862 | 47.97  | 26.82 | 25.69 | 26.10 | 26.20 | 1.49 |
| 166.0984 | 290.13 | 18.70 | 17.58 | 17.59 | 17.66 | 0.67 |
| 166.1226 | 170.03 | 17.23 | 14.94 | 15.19 | 15.78 | 1.54 |
| 166.4497 | 118.49 | 17.54 | 15.35 | 16.91 | 15.22 | 0.78 |
| 166.5189 | 31.56  | 14.88 | 16.22 | 16.68 | 16.56 | 0.90 |
| 166.5247 | 82.15  | 18.77 | 18.91 | 19.53 | 18.85 | 0.26 |
| 166.5326 | 81.15  | 15.37 | 15.82 | 15.97 | 15.64 | 0.36 |
| 166.5380 | 94.39  | 14.76 | 15.33 | 15.52 | 14.74 | 0.50 |
| 166.5426 | 275.85 | 16.21 | 18.74 | 19.27 | 17.34 | 1.13 |
| 166.9331 | 40.31  | 16.10 | 17.22 | 17.52 | 17.66 | 0.96 |
| 166.9507 | 41.13  | 21.30 | 23.34 | 23.53 | 23.28 | 1.70 |
| 166.9543 | 269.57 | 17.70 | 11.25 | 11.80 | 12.96 | 1.95 |
| 166.9591 | 86.87  | 15.20 | 16.54 | 16.93 | 15.99 | 0.69 |
| 166.9944 | 58.13  | 18.32 | 13.55 | 14.41 | 13.83 | 1.46 |
| 167.0127 | 273.19 | 21.63 | 19.66 | 19.82 | 20.17 | 1.07 |
| 167.0189 | 86.46  | 15.19 | 16.02 | 16.38 | 15.98 | 0.82 |
| 167.0218 | 67.48  | 18.17 | 18.07 | 18.14 | 17.95 | 0.10 |
| 167.0315 | 48.28  | 16.03 | 17.95 | 17.00 | 16.24 | 0.93 |
| 167.0338 | 24.61  | 18.03 | 15.30 | 15.26 | 15.11 | 1.57 |
| 167.0338 | 293.18 | 18.30 | 18.40 | 18.15 | 17.42 | 0.08 |
| 167.0390 | 63.25  | 14.61 | 17.47 | 16.66 | 17.59 | 1.00 |
| 167.0526 | 71.57  | 14.92 | 14.77 | 15.42 | 15.66 | 0.10 |
| 167.0563 | 188.48 | 16.25 | 14.30 | 14.48 | 15.46 | 1.36 |
| 167.0568 | 72.97  | 18.44 | 17.92 | 19.19 | 19.39 | 0.20 |
| 167.0615 | 65.47  | 16.74 | 16.68 | 16.64 | 16.21 | 0.08 |
| 167.0702 | 274.56 | 17.91 | 16.52 | 16.51 | 16.73 | 0.91 |
| 167.0814 | 280.79 | 18.55 | 16.61 | 16.45 | 16.57 | 1.33 |
| 167.0896 | 49.08  | 23.37 | 22.40 | 22.76 | 22.71 | 1.34 |
| 167.0927 | 281.27 | 17.89 | 16.85 | 16.79 | 16.67 | 0.73 |
| 167.1066 | 22.92  | 17.76 | 15.22 | 16.10 | 16.59 | 1.33 |
| 167.1066 | 289.93 | 18.53 | 17.24 | 17.33 | 17.39 | 0.82 |
| 167.1178 | 191.47 | 16.33 | 12.31 | 12.80 | 13.85 | 1.38 |

|          |        |       |       |       |       |      |
|----------|--------|-------|-------|-------|-------|------|
| 167.1430 | 21.11  | 17.41 | 14.60 | 15.38 | 15.62 | 1.64 |
| 167.1430 | 288.6  | 17.86 | 16.80 | 16.75 | 16.90 | 0.72 |
| 167.1543 | 128.81 | 16.35 | 18.41 | 18.41 | 17.84 | 1.01 |
| 167.4662 | 107.23 | 14.54 | 15.72 | 15.36 | 14.53 | 0.34 |
| 167.4704 | 117.12 | 16.25 | 10.32 | 13.23 | 11.60 | 1.27 |
| 167.4873 | 106.62 | 16.50 | 14.49 | 14.02 | 14.51 | 0.97 |
| 167.5097 | 30.32  | 15.05 | 12.74 | 16.66 | 15.96 | 0.15 |
| 167.5324 | 62.8   | 16.39 | 15.60 | 16.00 | 15.72 | 0.40 |
| 167.5411 | 85.22  | 19.28 | 21.81 | 21.34 | 21.05 | 1.30 |
| 167.5752 | 64.97  | 13.91 | 10.40 | 13.91 | 16.07 | 0.52 |
| 167.9541 | 41.59  | 16.30 | 17.89 | 18.03 | 17.65 | 1.32 |
| 167.9634 | 281.12 | 16.76 | 12.97 | 11.54 | 12.62 | 1.22 |
| 167.9641 | 20.32  | 15.58 | 12.03 | 12.10 | 13.76 | 1.11 |
| 167.9744 | 51.52  | 17.65 | 8.57  | 9.08  | 10.39 | 2.00 |
| 167.9863 | 29.14  | 16.34 | 12.52 | 13.18 | 13.66 | 1.88 |
| 167.9980 | 32.42  | 14.59 | 16.59 | 16.98 | 16.70 | 1.10 |
| 168.0060 | 275.98 | 18.21 | 19.73 | 19.97 | 19.40 | 0.97 |
| 168.0162 | 264.84 | 17.47 | 11.76 | 11.26 | 12.93 | 1.54 |
| 168.0248 | 32.49  | 15.02 | 13.91 | 13.25 | 14.13 | 0.80 |
| 168.0326 | 113.43 | 14.98 | 14.46 | 14.87 | 15.14 | 0.13 |
| 168.0423 | 77.32  | 17.55 | 18.22 | 17.89 | 18.18 | 0.43 |
| 168.0492 | 72.2   | 17.68 | 17.11 | 18.66 | 18.93 | 0.25 |
| 168.0575 | 71.38  | 14.74 | 11.84 | 15.42 | 15.38 | 0.36 |
| 168.0654 | 289.38 | 18.66 | 17.57 | 17.63 | 17.54 | 0.74 |
| 168.0767 | 276.43 | 17.98 | 16.65 | 16.41 | 16.62 | 1.23 |
| 168.0806 | 37.44  | 17.35 | 15.27 | 15.91 | 17.01 | 0.81 |
| 168.0808 | 190.81 | 16.57 | 13.73 | 14.09 | 14.35 | 1.68 |
| 168.0905 | 40.07  | 18.31 | 16.82 | 17.25 | 17.28 | 1.61 |
| 168.0962 | 159.4  | 17.93 | 16.17 | 16.54 | 16.39 | 1.33 |
| 168.1018 | 282.79 | 17.02 | 16.01 | 15.99 | 15.99 | 0.86 |
| 168.1019 | 141.32 | 18.27 | 16.31 | 17.11 | 16.51 | 1.24 |
| 168.1132 | 68.2   | 14.56 | 15.65 | 15.45 | 15.85 | 0.48 |
| 168.1383 | 197.06 | 16.54 | 13.97 | 14.23 | 14.55 | 1.61 |
| 168.4445 | 77.1   | 15.01 | 17.53 | 17.37 | 17.00 | 1.41 |
| 168.4861 | 91.36  | 16.12 | 8.95  | 9.59  | 9.95  | 2.00 |
| 168.5083 | 86.28  | 16.91 | 19.12 | 19.44 | 18.64 | 1.32 |
| 168.5398 | 84.67  | 17.95 | 18.42 | 18.00 | 18.12 | 0.27 |
| 168.5426 | 84.92  | 16.63 | 16.04 | 16.64 | 16.59 | 0.28 |
| 168.5577 | 28.15  | 17.18 | 20.10 | 20.10 | 20.37 | 1.63 |
| 168.9488 | 40.98  | 18.51 | 20.40 | 20.69 | 20.30 | 1.58 |
| 168.9924 | 35.42  | 16.39 | 15.47 | 16.76 | 15.86 | 0.21 |
| 169.0087 | 87.37  | 14.28 | 15.44 | 15.76 | 15.19 | 0.59 |
| 169.0270 | 52.85  | 20.30 | 19.34 | 19.19 | 18.12 | 0.78 |
| 169.0356 | 76.07  | 21.12 | 20.40 | 21.37 | 21.36 | 0.20 |
| 169.0454 | 272.48 | 18.34 | 20.60 | 20.33 | 19.71 | 0.84 |
| 169.0587 | 63.6   | 21.67 | 21.82 | 21.78 | 21.65 | 0.10 |
| 169.0759 | 284.67 | 18.59 | 16.44 | 16.31 | 16.45 | 1.39 |
| 169.0802 | 98.27  | 16.64 | 14.96 | 14.88 | 14.91 | 1.07 |
| 169.0858 | 290.41 | 18.39 | 17.16 | 17.18 | 17.13 | 0.78 |
| 169.0950 | 79.39  | 15.38 | 14.96 | 16.10 | 15.15 | 0.02 |
| 169.0971 | 289.81 | 16.87 | 16.15 | 15.98 | 15.94 | 0.63 |
| 169.1010 | 23.57  | 15.82 | 11.00 | 12.87 | 14.44 | 1.13 |
| 169.1067 | 194.26 | 17.62 | 14.63 | 15.10 | 15.34 | 1.72 |
| 169.1222 | 286.81 | 17.53 | 16.28 | 16.23 | 16.46 | 1.01 |
| 169.1587 | 193.73 | 16.13 | 13.74 | 14.15 | 13.93 | 1.02 |
| 169.1700 | 168.77 | 12.63 | 15.03 | 14.24 | 15.09 | 0.84 |

|          |        |       |       |       |       |      |
|----------|--------|-------|-------|-------|-------|------|
| 169.4897 | 269.06 | 16.56 | 14.75 | 14.67 | 15.99 | 0.52 |
| 169.5074 | 106.89 | 17.80 | 17.63 | 18.14 | 17.49 | 0.00 |
| 169.5274 | 195.29 | 13.66 | 15.02 | 15.04 | 15.84 | 0.62 |
| 169.5471 | 266.94 | 16.16 | 16.61 | 15.76 | 16.33 | 0.04 |
| 169.9607 | 51.25  | 17.17 | 10.22 | 14.31 | 12.09 | 1.26 |
| 169.9689 | 106.65 | 16.26 | 13.51 | 15.54 | 14.95 | 0.83 |
| 169.9772 | 281.03 | 21.59 | 17.43 | 16.76 | 19.11 | 1.70 |
| 169.9858 | 53.18  | 26.07 | 26.43 | 26.52 | 26.02 | 0.37 |
| 169.9900 | 85.68  | 18.37 | 11.01 | 9.86  | 15.38 | 1.67 |
| 170.0124 | 30.59  | 17.39 | 20.96 | 22.65 | 21.33 | 1.85 |
| 170.0271 | 196.08 | 12.68 | 14.25 | 13.33 | 15.09 | 0.39 |
| 170.0326 | 60.11  | 21.89 | 21.54 | 22.02 | 21.35 | 0.26 |
| 170.0477 | 92.9   | 17.85 | 14.72 | 15.64 | 15.69 | 1.17 |
| 170.0599 | 66.29  | 21.29 | 21.22 | 21.24 | 21.28 | 0.10 |
| 170.0653 | 83.44  | 22.01 | 21.81 | 21.90 | 21.74 | 0.30 |
| 170.0811 | 287.28 | 19.66 | 18.60 | 18.45 | 18.39 | 0.62 |
| 170.0924 | 67.46  | 22.83 | 22.45 | 22.42 | 22.44 | 0.71 |
| 170.0963 | 288.98 | 19.35 | 18.54 | 18.53 | 18.49 | 0.53 |
| 170.1175 | 23.15  | 17.56 | 13.95 | 14.70 | 14.95 | 1.85 |
| 170.1175 | 273.34 | 18.71 | 17.28 | 16.69 | 17.23 | 1.17 |
| 170.1539 | 200.81 | 16.23 | 13.61 | 13.95 | 13.94 | 1.48 |
| 170.5043 | 78.6   | 14.86 | 14.72 | 14.57 | 15.52 | 0.03 |
| 170.5088 | 269.83 | 22.09 | 21.76 | 22.39 | 22.38 | 0.00 |
| 170.5137 | 63.46  | 17.06 | 16.00 | 16.68 | 16.38 | 0.46 |
| 170.5240 | 86.94  | 15.98 | 18.10 | 17.62 | 17.24 | 1.39 |
| 170.5360 | 70.63  | 16.58 | 15.95 | 16.63 | 16.11 | 0.29 |
| 170.5596 | 83.67  | 16.53 | 17.54 | 17.36 | 17.81 | 0.87 |
| 170.5633 | 79.78  | 17.05 | 16.30 | 16.12 | 16.52 | 0.79 |
| 170.5670 | 74.78  | 19.09 | 18.60 | 18.56 | 18.59 | 0.72 |
| 170.8542 | 49.02  | 18.57 | 18.30 | 18.45 | 18.11 | 0.52 |
| 170.9141 | 100.14 | 17.08 | 13.92 | 11.29 | 15.30 | 1.20 |
| 170.9445 | 31.21  | 14.23 | 13.22 | 15.77 | 14.68 | 0.12 |
| 170.9610 | 108.8  | 17.42 | 11.36 | 9.82  | 14.92 | 1.49 |
| 170.9743 | 21.85  | 16.00 | 10.92 | 11.47 | 12.03 | 2.01 |
| 170.9839 | 54.42  | 20.26 | 20.00 | 20.12 | 19.78 | 0.30 |
| 170.9891 | 52.68  | 20.32 | 20.90 | 20.98 | 20.27 | 0.61 |
| 170.9919 | 52.31  | 16.32 | 15.76 | 15.39 | 14.95 | 0.54 |
| 170.9965 | 39.11  | 13.76 | 14.02 | 16.06 | 16.55 | 0.39 |
| 171.0056 | 272.75 | 17.48 | 15.88 | 15.54 | 16.69 | 0.98 |
| 171.0105 | 263.55 | 18.16 | 17.98 | 17.89 | 18.32 | 0.10 |
| 171.0162 | 98.46  | 17.60 | 19.88 | 18.98 | 18.72 | 1.27 |
| 171.0219 | 82.51  | 14.50 | 15.39 | 14.43 | 15.38 | 0.22 |
| 171.0360 | 55.91  | 17.12 | 16.42 | 16.73 | 16.29 | 0.60 |
| 171.0422 | 95.24  | 19.27 | 14.74 | 15.78 | 15.85 | 1.45 |
| 171.0627 | 64.62  | 17.96 | 17.20 | 16.58 | 17.58 | 0.84 |
| 171.0764 | 263.77 | 17.13 | 15.21 | 15.25 | 16.01 | 1.38 |
| 171.0859 | 200.76 | 16.74 | 14.11 | 14.33 | 14.51 | 1.54 |
| 171.0866 | 19.62  | 15.82 | 11.94 | 12.45 | 12.56 | 1.78 |
| 171.0895 | 71.82  | 16.24 | 14.43 | 14.34 | 15.04 | 0.69 |
| 171.0929 | 24.29  | 14.54 | 15.40 | 12.82 | 16.62 | 0.03 |
| 171.0958 | 70.46  | 18.91 | 18.15 | 18.06 | 18.22 | 1.12 |
| 171.1008 | 283.12 | 17.42 | 15.95 | 15.93 | 16.01 | 1.13 |
| 171.1128 | 209.98 | 16.51 | 14.31 | 14.64 | 15.00 | 1.57 |
| 171.1167 | 23.97  | 17.33 | 14.27 | 14.84 | 16.06 | 1.58 |
| 171.1169 | 165.63 | 16.60 | 14.22 | 14.41 | 14.72 | 1.57 |
| 171.1379 | 22.74  | 16.92 | 13.88 | 14.10 | 15.00 | 1.86 |

|          |        |       |       |       |       |      |
|----------|--------|-------|-------|-------|-------|------|
| 171.1379 | 278.76 | 17.91 | 16.51 | 16.30 | 16.70 | 0.92 |
| 171.1491 | 290.53 | 20.06 | 20.61 | 20.78 | 20.62 | 0.31 |
| 171.1856 | 135.69 | 13.36 | 17.23 | 17.02 | 16.42 | 1.16 |
| 171.4858 | 92.57  | 13.22 | 14.36 | 15.77 | 14.28 | 0.60 |
| 171.5167 | 211.63 | 11.91 | 14.64 | 14.62 | 12.84 | 0.96 |
| 171.5255 | 88.29  | 17.14 | 20.58 | 20.80 | 20.01 | 1.54 |
| 171.5342 | 38.1   | 16.23 | 13.78 | 17.66 | 15.49 | 0.24 |
| 171.5524 | 81.38  | 16.73 | 15.06 | 16.29 | 15.69 | 0.53 |
| 171.5704 | 26.76  | 16.54 | 20.52 | 15.61 | 15.56 | 0.66 |
| 171.5905 | 24.93  | 15.06 | 14.24 | 13.61 | 16.57 | 0.34 |
| 171.9594 | 138.25 | 16.80 | 7.83  | 9.25  | 12.76 | 1.63 |
| 171.9816 | 52.67  | 21.48 | 22.00 | 22.09 | 21.39 | 0.55 |
| 171.9848 | 268.38 | 17.23 | 15.23 | 15.20 | 14.86 | 0.83 |
| 171.9913 | 55.74  | 20.44 | 19.08 | 19.22 | 18.89 | 1.49 |
| 171.9928 | 295.23 | 18.79 | 12.06 | 10.89 | 15.85 | 1.50 |
| 172.0260 | 87.07  | 15.31 | 15.84 | 15.89 | 15.90 | 0.41 |
| 172.0309 | 50.92  | 18.06 | 17.95 | 18.55 | 18.31 | 0.20 |
| 172.0455 | 84.21  | 14.34 | 16.32 | 14.94 | 16.60 | 0.67 |
| 172.0580 | 51.8   | 18.58 | 15.89 | 15.96 | 16.29 | 1.77 |
| 172.0603 | 290.66 | 18.69 | 17.12 | 16.99 | 16.99 | 0.88 |
| 172.0671 | 70.87  | 17.87 | 17.74 | 17.69 | 17.72 | 0.19 |
| 172.0700 | 289.96 | 17.38 | 14.24 | 15.67 | 13.11 | 0.81 |
| 172.0757 | 212.6  | 16.44 | 13.58 | 13.57 | 13.86 | 1.38 |
| 172.0967 | 289.74 | 19.52 | 19.22 | 18.89 | 19.45 | 0.18 |
| 172.1007 | 23.87  | 15.69 | 16.94 | 15.44 | 17.63 | 0.45 |
| 172.1080 | 60.38  | 14.92 | 14.85 | 14.59 | 15.78 | 0.01 |
| 172.1332 | 22.56  | 16.64 | 14.10 | 14.77 | 14.42 | 1.66 |
| 172.1332 | 152.31 | 17.51 | 16.92 | 17.61 | 16.32 | 0.41 |
| 172.1525 | 281.46 | 17.20 | 16.14 | 16.31 | 16.24 | 0.84 |
| 172.1696 | 19.98  | 16.43 | 12.75 | 13.21 | 14.07 | 1.91 |
| 172.1696 | 190.59 | 17.20 | 14.78 | 15.22 | 15.52 | 1.45 |
| 172.4763 | 86.21  | 14.40 | 17.01 | 17.00 | 15.90 | 1.50 |
| 172.5028 | 89.72  | 17.44 | 10.29 | 13.36 | 11.48 | 1.44 |
| 172.5052 | 275.25 | 14.63 | 15.56 | 14.50 | 15.88 | 0.23 |
| 172.5197 | 78.16  | 20.24 | 20.57 | 21.12 | 20.62 | 0.33 |
| 172.5241 | 86.88  | 14.54 | 17.14 | 17.18 | 16.71 | 1.27 |
| 172.5332 | 89.7   | 16.14 | 20.58 | 21.09 | 19.45 | 1.72 |
| 172.5515 | 59.06  | 17.23 | 15.47 | 16.10 | 15.78 | 0.84 |
| 172.8513 | 48.43  | 17.87 | 17.47 | 17.59 | 17.25 | 0.70 |
| 172.9522 | 271.01 | 23.12 | 22.42 | 21.79 | 22.17 | 0.53 |
| 172.9562 | 257.1  | 20.73 | 15.69 | 14.75 | 17.46 | 1.69 |
| 172.9563 | 89.7   | 21.76 | 17.25 | 17.28 | 18.92 | 1.69 |
| 172.9773 | 298.77 | 17.75 | 11.03 | 8.58  | 13.65 | 1.42 |
| 173.0210 | 252.25 | 17.98 | 19.40 | 14.78 | 17.84 | 0.15 |
| 173.0275 | 84.84  | 18.23 | 19.99 | 20.03 | 19.16 | 0.95 |
| 173.0301 | 300.34 | 17.76 | 16.45 | 15.16 | 17.04 | 1.05 |
| 173.0338 | 89.75  | 15.46 | 16.53 | 17.10 | 16.07 | 0.99 |
| 173.0394 | 83.95  | 16.14 | 15.81 | 15.90 | 15.99 | 0.26 |
| 173.0426 | 251.68 | 18.24 | 17.10 | 18.18 | 16.62 | 0.43 |
| 173.0558 | 65.18  | 17.29 | 16.11 | 16.42 | 16.44 | 1.33 |
| 173.0638 | 200.78 | 16.35 | 13.90 | 14.53 | 14.14 | 0.92 |
| 173.0799 | 242.22 | 16.48 | 14.01 | 14.09 | 14.70 | 1.66 |
| 173.0920 | 258.38 | 18.84 | 17.11 | 18.73 | 17.42 | 0.68 |
| 173.0961 | 208.08 | 16.50 | 13.81 | 14.38 | 14.57 | 1.49 |
| 173.1005 | 175.93 | 17.29 | 14.07 | 14.12 | 14.98 | 1.71 |
| 173.1285 | 166.53 | 17.11 | 15.39 | 15.84 | 15.81 | 1.26 |



|          |        |       |       |       |       |      |
|----------|--------|-------|-------|-------|-------|------|
| 173.1324 | 24     | 18.08 | 15.41 | 16.27 | 17.11 | 1.41 |
| 173.1325 | 179.77 | 17.47 | 15.10 | 15.16 | 15.64 | 1.52 |
| 173.1648 | 26.1   | 17.36 | 20.91 | 18.98 | 18.55 | 1.15 |
| 173.4922 | 43.75  | 20.65 | 19.44 | 19.40 | 19.73 | 1.31 |
| 173.4922 | 277.45 | 20.72 | 19.96 | 20.12 | 20.25 | 0.46 |
| 173.5181 | 89.35  | 17.27 | 14.73 | 15.57 | 15.71 | 1.22 |
| 173.5226 | 272.45 | 17.61 | 16.34 | 16.55 | 16.93 | 0.98 |
| 173.5270 | 86.59  | 16.41 | 16.05 | 16.47 | 15.90 | 0.14 |
| 173.5319 | 91.8   | 16.71 | 17.52 | 17.97 | 16.91 | 0.76 |
| 173.5361 | 87.39  | 15.66 | 16.02 | 16.02 | 16.08 | 0.49 |
| 173.5417 | 92.38  | 16.22 | 16.06 | 15.58 | 15.36 | 0.24 |
| 173.5443 | 92.32  | 15.70 | 17.07 | 17.38 | 16.54 | 0.65 |
| 173.9293 | 267.47 | 16.87 | 13.91 | 14.33 | 14.62 | 1.03 |
| 173.9566 | 101.09 | 16.67 | 10.56 | 12.05 | 14.39 | 1.31 |
| 173.9880 | 117.88 | 13.77 | 15.07 | 15.45 | 15.07 | 0.70 |
| 174.0061 | 274.6  | 19.27 | 21.14 | 21.84 | 20.65 | 1.58 |
| 174.0134 | 60.15  | 16.23 | 15.32 | 16.01 | 16.22 | 0.27 |
| 174.0243 | 90.47  | 17.68 | 17.38 | 17.47 | 17.27 | 0.33 |
| 174.0344 | 89.03  | 16.44 | 18.11 | 18.83 | 17.19 | 1.07 |
| 174.0405 | 105.96 | 18.21 | 16.87 | 16.83 | 16.54 | 1.21 |
| 174.0448 | 85.85  | 15.46 | 15.71 | 15.96 | 16.02 | 0.43 |
| 174.0550 | 191.3  | 17.04 | 14.63 | 14.82 | 15.07 | 1.73 |
| 174.0761 | 171.07 | 24.54 | 21.73 | 20.43 | 22.42 | 1.12 |
| 174.0856 | 187.39 | 14.23 | 13.81 | 14.40 | 12.95 | 0.12 |
| 174.0947 | 191.6  | 17.58 | 14.44 | 14.68 | 15.27 | 1.70 |
| 174.1124 | 287.31 | 19.28 | 17.35 | 17.28 | 17.66 | 1.20 |
| 174.1277 | 274.38 | 17.26 | 16.19 | 16.05 | 16.42 | 0.93 |
| 174.1311 | 194.44 | 17.41 | 14.98 | 15.85 | 15.46 | 1.40 |
| 174.1487 | 27.6   | 17.36 | 17.05 | 16.66 | 16.58 | 0.51 |
| 174.1601 | 30.18  | 15.14 | 17.36 | 16.11 | 17.05 | 1.02 |
| 174.1681 | 25.9   | 14.75 | 16.91 | 15.27 | 14.34 | 0.44 |
| 174.5079 | 271.62 | 13.69 | 15.86 | 17.13 | 15.26 | 1.01 |
| 174.5109 | 55.18  | 18.70 | 14.31 | 14.87 | 16.43 | 1.43 |
| 174.5206 | 67.08  | 16.14 | 14.87 | 15.34 | 15.01 | 0.49 |
| 174.5351 | 81.07  | 15.86 | 17.90 | 18.24 | 17.19 | 1.39 |
| 174.8959 | 92.41  | 16.01 | 20.70 | 19.00 | 19.74 | 1.54 |
| 174.9380 | 50.48  | 19.16 | 19.02 | 19.17 | 19.13 | 0.14 |
| 174.9483 | 115.45 | 14.84 | 11.76 | 13.57 | 11.65 | 0.75 |
| 174.9534 | 101.37 | 20.25 | 15.87 | 14.76 | 17.95 | 1.60 |
| 174.9567 | 251.06 | 18.72 | 15.08 | 14.77 | 16.52 | 1.67 |
| 174.9567 | 117    | 19.15 | 15.78 | 17.06 | 17.68 | 1.60 |
| 174.9803 | 23.22  | 17.05 | 10.93 | 11.48 | 12.46 | 1.92 |
| 174.9925 | 271.27 | 17.60 | 15.30 | 15.87 | 15.53 | 1.13 |
| 174.9978 | 60.61  | 15.56 | 13.94 | 15.00 | 15.90 | 0.36 |
| 175.0017 | 42.87  | 23.20 | 23.64 | 23.67 | 24.03 | 0.44 |
| 175.0075 | 35.56  | 16.16 | 17.62 | 19.68 | 17.27 | 1.15 |
| 175.0416 | 94.04  | 15.38 | 15.40 | 15.08 | 14.71 | 0.16 |
| 175.0503 | 60.53  | 15.53 | 13.30 | 13.79 | 14.10 | 0.58 |
| 175.0579 | 62.33  | 14.86 | 15.82 | 15.35 | 15.31 | 0.36 |
| 175.0719 | 207.18 | 15.83 | 13.29 | 13.56 | 13.76 | 1.26 |
| 175.0754 | 204.3  | 16.09 | 13.74 | 14.36 | 14.56 | 1.13 |
| 175.0793 | 284.72 | 20.93 | 19.20 | 18.74 | 19.54 | 0.86 |
| 175.0865 | 215.02 | 16.20 | 11.84 | 11.87 | 12.80 | 1.22 |
| 175.0980 | 191.51 | 16.75 | 13.63 | 14.09 | 14.50 | 1.73 |
| 175.1077 | 155.64 | 17.72 | 17.12 | 15.84 | 17.12 | 0.87 |
| 175.1117 | 22.21  | 16.64 | 13.41 | 14.32 | 14.94 | 1.69 |

|          |        |       |       |       |       |      |
|----------|--------|-------|-------|-------|-------|------|
| 175.1118 | 169.16 | 17.22 | 15.50 | 15.72 | 15.92 | 1.26 |
| 175.1190 | 73.44  | 25.50 | 25.86 | 26.10 | 26.19 | 0.46 |
| 175.1441 | 65.62  | 17.70 | 18.18 | 17.63 | 17.70 | 0.22 |
| 175.1480 | 24.18  | 18.94 | 16.84 | 17.43 | 17.98 | 1.49 |
| 175.1481 | 287.99 | 18.29 | 16.53 | 16.71 | 16.70 | 1.07 |
| 175.4550 | 119.06 | 15.72 | 14.38 | 15.10 | 14.11 | 0.53 |
| 175.5104 | 54.45  | 13.67 | 11.92 | 15.68 | 12.65 | 0.06 |
| 175.5298 | 82.3   | 21.55 | 22.83 | 23.25 | 22.41 | 0.79 |
| 175.5433 | 92.34  | 16.11 | 19.81 | 20.20 | 18.30 | 1.76 |
| 175.5504 | 85.7   | 15.99 | 16.03 | 15.89 | 16.18 | 0.01 |
| 175.6038 | 20.46  | 14.11 | 16.23 | 14.45 | 16.26 | 0.72 |
| 175.6038 | 264.47 | 17.29 | 13.16 | 13.09 | 13.61 | 1.35 |
| 175.9546 | 98.97  | 18.18 | 11.99 | 13.72 | 12.14 | 1.37 |
| 175.9900 | 144.1  | 15.94 | 13.85 | 13.36 | 13.41 | 0.86 |
| 175.9989 | 42.6   | 17.47 | 16.27 | 16.29 | 17.07 | 0.98 |
| 176.0050 | 38.19  | 18.84 | 19.03 | 19.10 | 19.48 | 0.31 |
| 176.0098 | 51.5   | 20.63 | 20.24 | 20.16 | 19.37 | 0.65 |
| 176.0162 | 37.08  | 17.22 | 16.87 | 18.98 | 17.42 | 0.35 |
| 176.0169 | 167.47 | 14.05 | 14.85 | 14.66 | 14.50 | 0.33 |
| 176.0315 | 78.67  | 17.80 | 15.59 | 17.20 | 16.54 | 0.79 |
| 176.0375 | 292.63 | 15.87 | 17.10 | 17.61 | 16.73 | 0.81 |
| 176.0389 | 45.55  | 21.20 | 21.19 | 21.13 | 21.48 | 0.02 |
| 176.0437 | 92.55  | 15.16 | 16.33 | 16.25 | 15.26 | 0.88 |
| 176.0554 | 161.97 | 18.09 | 15.62 | 15.60 | 16.70 | 1.57 |
| 176.0554 | 24.9   | 17.06 | 13.52 | 14.58 | 14.89 | 1.37 |
| 176.0658 | 49.85  | 19.67 | 19.08 | 19.49 | 19.08 | 0.67 |
| 176.0706 | 21.55  | 16.96 | 13.29 | 15.24 | 15.37 | 1.22 |
| 176.0706 | 280.03 | 17.29 | 15.64 | 15.48 | 15.65 | 1.16 |
| 176.0707 | 178.75 | 17.96 | 15.28 | 15.33 | 15.92 | 1.53 |
| 176.0738 | 285.41 | 16.69 | 16.09 | 15.74 | 15.49 | 0.50 |
| 176.0827 | 288.44 | 19.66 | 18.62 | 18.25 | 18.67 | 0.65 |
| 176.0957 | 24.78  | 14.33 | 14.79 | 13.92 | 15.99 | 0.15 |
| 176.1029 | 162.99 | 17.08 | 20.54 | 16.84 | 20.34 | 0.61 |
| 176.1058 | 33.61  | 15.45 | 9.64  | 11.76 | 11.96 | 1.22 |
| 176.1069 | 199.39 | 16.86 | 11.49 | 13.28 | 12.79 | 1.73 |
| 176.1102 | 274.68 | 18.87 | 16.28 | 15.91 | 16.53 | 1.58 |
| 176.1162 | 74.73  | 18.95 | 19.50 | 19.91 | 19.70 | 0.69 |
| 176.1223 | 72.79  | 21.43 | 21.93 | 22.27 | 22.12 | 0.62 |
| 176.1281 | 49.16  | 20.48 | 20.94 | 20.54 | 20.64 | 0.43 |
| 176.1514 | 23.15  | 16.25 | 10.27 | 12.60 | 13.53 | 1.32 |
| 176.4928 | 98.82  | 18.92 | 10.77 | 12.66 | 11.88 | 1.74 |
| 176.4972 | 103.3  | 18.36 | 16.68 | 18.01 | 16.73 | 0.79 |
| 176.5177 | 37.06  | 14.46 | 11.16 | 15.09 | 13.82 | 0.58 |
| 176.5278 | 83.13  | 17.36 | 17.44 | 18.32 | 17.26 | 0.22 |
| 176.5318 | 82.57  | 18.67 | 16.08 | 17.36 | 16.99 | 1.17 |
| 176.5422 | 92.83  | 14.62 | 16.40 | 16.59 | 14.92 | 1.19 |
| 176.5463 | 80.72  | 16.36 | 16.82 | 16.55 | 16.70 | 0.33 |
| 176.6115 | 24.78  | 12.56 | 15.55 | 12.93 | 15.89 | 0.68 |
| 176.8941 | 107.37 | 15.48 | 16.85 | 15.10 | 16.29 | 0.29 |
| 176.9367 | 28.4   | 16.98 | 18.87 | 18.97 | 18.74 | 1.67 |
| 176.9451 | 255.16 | 17.11 | 15.32 | 14.65 | 15.87 | 0.97 |
| 176.9451 | 147.37 | 17.32 | 15.73 | 17.56 | 16.02 | 0.59 |
| 176.9528 | 107.84 | 17.04 | 10.65 | 11.06 | 14.12 | 1.43 |
| 176.9924 | 75.78  | 16.99 | 16.15 | 16.07 | 16.42 | 0.90 |
| 176.9998 | 43.33  | 19.46 | 19.57 | 19.69 | 19.99 | 0.25 |
| 177.0141 | 51.79  | 16.68 | 15.71 | 16.02 | 14.62 | 0.45 |

|          |        |       |       |       |       |      |
|----------|--------|-------|-------|-------|-------|------|
| 177.0203 | 29.87  | 15.69 | 16.87 | 17.86 | 17.54 | 0.89 |
| 177.0247 | 72.52  | 17.13 | 16.39 | 15.70 | 16.39 | 0.57 |
| 177.0328 | 193.51 | 17.40 | 20.62 | 20.51 | 20.43 | 1.41 |
| 177.0411 | 39.86  | 20.31 | 21.19 | 20.97 | 20.81 | 0.68 |
| 177.0513 | 74.69  | 17.27 | 16.61 | 16.45 | 16.77 | 0.62 |
| 177.0546 | 205.86 | 16.88 | 14.45 | 14.89 | 15.10 | 1.66 |
| 177.0647 | 298.02 | 14.73 | 13.90 | 11.49 | 13.12 | 0.60 |
| 177.0691 | 50.54  | 14.81 | 13.76 | 14.91 | 14.37 | 0.18 |
| 177.0774 | 34.38  | 16.27 | 15.80 | 16.03 | 15.26 | 0.29 |
| 177.0860 | 288.47 | 21.26 | 20.28 | 20.90 | 20.96 | 0.30 |
| 177.0910 | 171.2  | 17.62 | 15.32 | 15.66 | 16.35 | 1.44 |
| 177.0950 | 280.74 | 20.61 | 19.07 | 18.68 | 18.88 | 0.81 |
| 177.1012 | 47.96  | 18.81 | 19.01 | 19.40 | 19.32 | 0.35 |
| 177.1064 | 161.49 | 12.29 | 14.96 | 13.03 | 14.89 | 0.71 |
| 177.1228 | 60.1   | 17.55 | 18.38 | 18.19 | 18.71 | 0.88 |
| 177.1273 | 288.37 | 17.46 | 16.20 | 16.21 | 16.13 | 0.93 |
| 177.1273 | 20.23  | 17.20 | 14.46 | 14.53 | 15.06 | 1.61 |
| 177.1637 | 23.81  | 18.04 | 15.57 | 15.81 | 16.68 | 1.62 |
| 177.1638 | 176.99 | 18.13 | 15.27 | 15.79 | 16.24 | 1.54 |
| 177.5256 | 254.12 | 15.06 | 15.64 | 14.95 | 14.99 | 0.15 |
| 177.5334 | 84.77  | 18.18 | 15.49 | 14.84 | 16.31 | 1.34 |
| 177.5438 | 61.7   | 16.45 | 15.82 | 16.99 | 15.85 | 0.12 |
| 177.5470 | 84.71  | 18.10 | 16.13 | 16.58 | 17.14 | 1.28 |
| 177.9480 | 287.81 | 15.94 | 18.41 | 18.19 | 16.71 | 1.35 |
| 177.9575 | 274.75 | 25.15 | 24.60 | 24.34 | 24.44 | 0.42 |
| 177.9988 | 186.03 | 12.13 | 9.49  | 10.57 | 14.27 | 0.34 |
| 178.0087 | 69.64  | 18.72 | 16.79 | 17.10 | 16.85 | 1.18 |
| 178.0240 | 47.74  | 19.65 | 19.76 | 19.97 | 19.68 | 0.46 |
| 178.0351 | 286.58 | 18.32 | 17.47 | 17.50 | 17.46 | 0.62 |
| 178.0409 | 59.93  | 14.59 | 14.17 | 15.24 | 14.68 | 0.02 |
| 178.0447 | 41.04  | 16.66 | 16.09 | 15.91 | 16.22 | 0.44 |
| 178.0504 | 276.48 | 16.83 | 17.65 | 17.77 | 16.52 | 0.47 |
| 178.0532 | 62.74  | 12.19 | 14.99 | 14.80 | 15.70 | 0.79 |
| 178.0588 | 76.99  | 17.44 | 17.87 | 17.70 | 18.20 | 0.43 |
| 178.0721 | 300.37 | 16.62 | 16.41 | 15.31 | 15.64 | 0.60 |
| 178.0862 | 288.63 | 17.58 | 15.52 | 15.64 | 16.10 | 1.11 |
| 178.0896 | 169    | 17.50 | 14.72 | 14.82 | 15.44 | 1.68 |
| 178.0960 | 178.34 | 17.12 | 13.24 | 13.29 | 14.15 | 1.65 |
| 178.0977 | 280.62 | 18.43 | 16.11 | 16.35 | 16.27 | 1.26 |
| 178.1073 | 294.64 | 17.13 | 15.67 | 15.95 | 15.83 | 0.76 |
| 178.1074 | 201.58 | 18.82 | 16.07 | 17.14 | 16.56 | 1.33 |
| 178.1170 | 153.14 | 16.70 | 15.20 | 15.91 | 14.85 | 0.84 |
| 178.1225 | 277.68 | 18.57 | 17.39 | 17.13 | 17.72 | 0.98 |
| 178.1295 | 24.46  | 12.23 | 15.58 | 13.06 | 16.12 | 0.78 |
| 178.1338 | 26.04  | 21.23 | 20.80 | 20.78 | 21.17 | 0.31 |
| 178.4949 | 281.78 | 16.20 | 14.96 | 14.37 | 15.22 | 0.53 |
| 178.5016 | 103.92 | 16.34 | 15.67 | 16.04 | 16.39 | 0.39 |
| 178.5308 | 90.25  | 18.26 | 12.87 | 14.17 | 13.73 | 1.51 |
| 178.5335 | 94.95  | 17.65 | 12.91 | 13.19 | 14.77 | 1.67 |
| 178.5491 | 91.52  | 19.89 | 16.10 | 16.36 | 16.49 | 1.68 |
| 178.5604 | 67.6   | 14.89 | 15.71 | 15.14 | 15.22 | 0.22 |
| 178.9332 | 43.8   | 12.88 | 14.76 | 14.93 | 14.94 | 1.44 |
| 178.9416 | 276.43 | 18.33 | 18.93 | 19.21 | 18.88 | 0.63 |
| 178.9548 | 116.64 | 17.03 | 14.85 | 15.17 | 15.37 | 1.35 |
| 178.9610 | 257.68 | 19.13 | 17.50 | 17.22 | 17.78 | 1.02 |
| 178.9656 | 102.87 | 17.62 | 14.57 | 15.67 | 15.12 | 1.34 |

|          |        |       |       |       |       |      |
|----------|--------|-------|-------|-------|-------|------|
| 178.9742 | 104.03 | 14.71 | 15.63 | 15.84 | 15.94 | 0.51 |
| 178.9822 | 60.03  | 17.86 | 13.53 | 14.19 | 15.27 | 1.20 |
| 178.9907 | 272.97 | 18.07 | 10.20 | 10.81 | 11.76 | 2.00 |
| 178.9925 | 49.47  | 17.43 | 17.24 | 18.47 | 18.08 | 0.36 |
| 179.0286 | 196.82 | 13.41 | 14.04 | 13.72 | 15.01 | 0.27 |
| 179.0299 | 86.9   | 18.90 | 13.68 | 14.02 | 15.98 | 1.54 |
| 179.0376 | 37.32  | 16.13 | 16.34 | 15.70 | 17.58 | 0.10 |
| 179.0485 | 193.05 | 19.10 | 20.36 | 21.14 | 20.19 | 1.10 |
| 179.0561 | 58.79  | 16.03 | 15.93 | 15.12 | 15.64 | 0.21 |
| 179.0637 | 269.32 | 17.80 | 16.85 | 16.41 | 17.23 | 0.98 |
| 179.0702 | 289.62 | 17.17 | 17.36 | 15.96 | 16.44 | 0.32 |
| 179.0702 | 20.59  | 16.49 | 15.09 | 13.05 | 14.31 | 1.14 |
| 179.0816 | 148.79 | 18.04 | 15.51 | 15.38 | 16.39 | 1.65 |
| 179.1018 | 155.52 | 21.28 | 20.34 | 20.56 | 20.22 | 0.29 |
| 179.1065 | 284.76 | 18.37 | 17.14 | 17.22 | 17.10 | 0.86 |
| 179.1065 | 20.18  | 17.70 | 14.69 | 15.27 | 15.88 | 1.78 |
| 179.1285 | 62.09  | 19.20 | 20.21 | 20.11 | 19.76 | 0.93 |
| 179.1371 | 25.83  | 18.07 | 16.78 | 17.06 | 17.68 | 0.78 |
| 179.1429 | 23.75  | 17.68 | 16.08 | 16.70 | 16.65 | 1.31 |
| 179.1429 | 298    | 17.71 | 17.24 | 17.39 | 17.31 | 0.31 |
| 179.4758 | 105.29 | 18.11 | 12.34 | 14.51 | 13.70 | 1.28 |
| 179.5140 | 278.83 | 19.52 | 21.10 | 21.12 | 20.71 | 1.08 |
| 179.5413 | 77.27  | 18.26 | 18.24 | 19.23 | 18.07 | 0.25 |
| 179.6062 | 24.53  | 15.15 | 17.19 | 15.92 | 18.17 | 0.91 |
| 179.6301 | 57.29  | 17.12 | 17.28 | 17.06 | 17.05 | 0.05 |
| 179.9537 | 254.67 | 17.27 | 15.43 | 15.60 | 15.93 | 1.17 |
| 179.9537 | 128.43 | 18.08 | 16.43 | 17.81 | 16.64 | 0.89 |
| 179.9619 | 253.73 | 17.62 | 15.75 | 15.79 | 15.87 | 1.17 |
| 179.9620 | 129.61 | 17.94 | 16.89 | 18.16 | 17.09 | 0.49 |
| 179.9677 | 92.3   | 16.78 | 16.60 | 16.59 | 16.55 | 0.19 |
| 179.9734 | 109.23 | 20.38 | 18.73 | 19.71 | 18.81 | 1.24 |
| 179.9823 | 97.4   | 18.15 | 21.94 | 21.08 | 21.04 | 1.65 |
| 179.9856 | 152.5  | 19.19 | 15.10 | 14.22 | 16.67 | 1.57 |
| 179.9907 | 94.63  | 22.59 | 24.95 | 25.39 | 24.34 | 1.18 |
| 180.0033 | 62.59  | 17.69 | 14.60 | 16.89 | 15.94 | 0.95 |
| 180.0157 | 286.51 | 15.49 | 16.84 | 16.99 | 16.20 | 0.61 |
| 180.0165 | 88.6   | 14.78 | 13.29 | 13.69 | 14.40 | 0.42 |
| 180.0222 | 48.35  | 16.82 | 14.21 | 14.96 | 15.04 | 1.23 |
| 180.0461 | 62.87  | 15.76 | 14.91 | 13.71 | 14.69 | 0.63 |
| 180.0518 | 187.78 | 12.96 | 14.80 | 14.28 | 15.01 | 0.72 |
| 180.0518 | 64.24  | 17.74 | 18.65 | 18.44 | 17.79 | 0.40 |
| 180.0655 | 276.4  | 19.33 | 17.97 | 16.79 | 16.70 | 0.98 |
| 180.0767 | 291.91 | 17.64 | 16.49 | 16.32 | 16.26 | 0.92 |
| 180.0867 | 208.44 | 17.01 | 13.80 | 13.95 | 14.66 | 1.81 |
| 180.0867 | 84.67  | 17.81 | 16.19 | 16.22 | 16.97 | 1.31 |
| 180.0988 | 227.77 | 14.52 | 11.72 | 11.26 | 12.76 | 1.32 |
| 180.1016 | 283.6  | 16.84 | 15.58 | 15.88 | 15.79 | 0.83 |
| 180.1383 | 197.24 | 16.70 | 14.64 | 14.71 | 15.10 | 1.58 |
| 180.1464 | 197.86 | 16.06 | 11.09 | 12.62 | 12.61 | 1.27 |
| 180.4650 | 102.46 | 15.26 | 17.02 | 16.02 | 16.15 | 0.97 |
| 180.5060 | 80.68  | 17.12 | 15.09 | 14.30 | 16.46 | 0.93 |
| 180.5220 | 95.42  | 19.64 | 19.91 | 20.49 | 19.48 | 0.38 |
| 180.5756 | 26.42  | 16.05 | 17.46 | 14.59 | 14.71 | 0.06 |
| 180.5958 | 24.69  | 14.78 | 15.69 | 13.57 | 17.56 | 0.17 |
| 180.9040 | 104.89 | 14.08 | 18.77 | 16.10 | 18.47 | 1.13 |
| 180.9575 | 93.96  | 17.13 | 11.25 | 14.55 | 11.64 | 0.98 |

|          |        |       |       |       |       |      |
|----------|--------|-------|-------|-------|-------|------|
| 180.9664 | 39.75  | 16.66 | 18.58 | 17.16 | 16.95 | 0.76 |
| 180.9747 | 86.24  | 15.48 | 19.09 | 19.20 | 18.08 | 1.57 |
| 180.9890 | 70.68  | 19.87 | 21.87 | 22.21 | 21.38 | 1.29 |
| 180.9976 | 90.64  | 13.94 | 13.52 | 14.72 | 13.87 | 0.03 |
| 181.0094 | 51.4   | 18.49 | 15.46 | 17.38 | 17.29 | 1.04 |
| 181.0155 | 101.96 | 16.43 | 15.03 | 15.81 | 15.43 | 0.63 |
| 181.0180 | 33.46  | 17.03 | 16.71 | 16.41 | 15.60 | 0.35 |
| 181.0238 | 94.56  | 16.57 | 15.33 | 16.19 | 15.40 | 0.80 |
| 181.0408 | 94.11  | 13.57 | 15.02 | 14.74 | 14.58 | 0.44 |
| 181.0438 | 195.1  | 12.28 | 13.95 | 13.60 | 14.20 | 0.64 |
| 181.0444 | 65.91  | 17.65 | 18.10 | 17.75 | 17.55 | 0.18 |
| 181.0496 | 112.07 | 17.04 | 14.73 | 15.29 | 14.81 | 1.14 |
| 181.0533 | 35.85  | 15.36 | 16.27 | 15.88 | 17.77 | 0.51 |
| 181.0608 | 227.78 | 16.86 | 16.54 | 16.70 | 16.66 | 0.31 |
| 181.0719 | 291.51 | 18.87 | 19.79 | 19.31 | 19.25 | 0.31 |
| 181.0859 | 22.6   | 16.89 | 13.50 | 14.44 | 15.14 | 1.55 |
| 181.0859 | 174.3  | 17.28 | 15.16 | 15.13 | 15.82 | 1.39 |
| 181.0971 | 286.77 | 17.32 | 15.83 | 15.66 | 15.95 | 1.13 |
| 181.0972 | 150.13 | 18.51 | 15.72 | 16.23 | 16.63 | 1.59 |
| 181.1028 | 49.55  | 16.45 | 15.83 | 16.69 | 16.42 | 0.18 |
| 181.1065 | 20.21  | 16.09 | 15.67 | 14.19 | 16.17 | 0.39 |
| 181.1222 | 24.46  | 17.95 | 16.68 | 17.12 | 17.51 | 1.17 |
| 181.1222 | 291.46 | 19.15 | 17.50 | 17.65 | 18.07 | 0.82 |
| 181.1586 | 286.6  | 17.55 | 16.25 | 16.41 | 16.48 | 0.99 |
| 181.3611 | 250.34 | 15.27 | 14.72 | 15.19 | 15.03 | 0.21 |
| 181.5074 | 103.05 | 17.86 | 13.20 | 13.26 | 13.51 | 1.29 |
| 181.5250 | 87.73  | 15.97 | 16.05 | 16.05 | 16.16 | 0.05 |
| 181.5386 | 89.57  | 16.22 | 18.10 | 18.20 | 17.48 | 1.35 |
| 181.5699 | 81.52  | 15.23 | 15.48 | 15.56 | 15.59 | 0.18 |
| 181.9506 | 262.24 | 19.19 | 17.80 | 17.24 | 18.07 | 1.01 |
| 181.9758 | 87.72  | 12.98 | 14.57 | 15.19 | 14.27 | 0.71 |
| 181.9795 | 83.48  | 20.40 | 20.62 | 21.08 | 20.20 | 0.20 |
| 181.9950 | 87.86  | 16.50 | 17.91 | 18.73 | 17.67 | 1.17 |
| 182.0009 | 72.54  | 14.31 | 15.19 | 15.64 | 14.36 | 0.40 |
| 182.0064 | 90.96  | 15.86 | 16.43 | 17.10 | 16.17 | 0.70 |
| 182.0233 | 97.18  | 18.81 | 17.56 | 18.50 | 17.64 | 0.70 |
| 182.0274 | 85.12  | 17.22 | 17.61 | 17.37 | 17.29 | 0.30 |
| 182.0325 | 87.69  | 17.27 | 18.29 | 17.77 | 17.68 | 0.67 |
| 182.0574 | 131.36 | 14.76 | 16.23 | 16.62 | 15.98 | 1.00 |
| 182.0578 | 47.71  | 21.81 | 22.74 | 22.30 | 22.32 | 0.83 |
| 182.0697 | 29.59  | 15.29 | 16.34 | 10.26 | 10.90 | 0.58 |
| 182.0753 | 29.87  | 15.77 | 10.62 | 10.91 | 11.49 | 1.70 |
| 182.0754 | 182.72 | 17.34 | 13.98 | 14.07 | 14.76 | 1.71 |
| 182.0811 | 53.3   | 24.77 | 23.82 | 24.32 | 24.14 | 1.29 |
| 182.0924 | 286.34 | 17.24 | 15.81 | 15.75 | 15.85 | 1.24 |
| 182.0924 | 161.98 | 18.09 | 15.73 | 16.02 | 16.42 | 1.50 |
| 182.1175 | 265.57 | 17.41 | 15.77 | 16.07 | 16.41 | 1.15 |
| 182.1256 | 197.71 | 16.61 | 12.11 | 12.18 | 13.70 | 1.39 |
| 182.1540 | 201.83 | 16.07 | 12.83 | 13.30 | 13.30 | 1.17 |
| 182.4936 | 89.12  | 15.47 | 15.34 | 15.82 | 15.34 | 0.02 |
| 182.5101 | 84.67  | 16.60 | 16.93 | 17.64 | 17.35 | 0.45 |
| 182.5243 | 107.39 | 17.25 | 19.16 | 18.01 | 18.19 | 0.81 |
| 182.5279 | 70.32  | 16.51 | 15.30 | 15.23 | 15.24 | 0.58 |
| 182.5352 | 199.8  | 17.00 | 17.46 | 18.35 | 18.91 | 0.59 |
| 182.9618 | 250.68 | 19.30 | 16.32 | 15.95 | 16.96 | 1.64 |
| 182.9682 | 56.83  | 17.11 | 11.55 | 12.74 | 12.70 | 1.82 |

|          |        |       |       |       |       |      |
|----------|--------|-------|-------|-------|-------|------|
| 182.9724 | 88.25  | 14.28 | 15.48 | 15.86 | 14.67 | 0.56 |
| 182.9815 | 86.62  | 15.66 | 20.72 | 20.88 | 19.13 | 1.86 |
| 182.9851 | 289.46 | 20.17 | 16.13 | 15.51 | 17.46 | 1.67 |
| 183.0062 | 47.13  | 17.39 | 18.98 | 17.49 | 17.26 | 0.58 |
| 183.0113 | 275.3  | 14.85 | 18.13 | 18.96 | 17.32 | 1.42 |
| 183.0307 | 84.92  | 16.66 | 16.57 | 16.53 | 16.98 | 0.05 |
| 183.0369 | 206.61 | 17.07 | 19.06 | 18.97 | 19.08 | 1.18 |
| 183.0434 | 71.45  | 17.65 | 16.61 | 16.98 | 16.99 | 1.10 |
| 183.0470 | 75.05  | 17.33 | 14.44 | 15.45 | 15.46 | 1.09 |
| 183.0503 | 84.31  | 16.93 | 18.55 | 18.59 | 18.47 | 1.28 |
| 183.0613 | 36.98  | 18.03 | 18.80 | 18.10 | 18.37 | 0.46 |
| 183.0652 | 216.54 | 15.55 | 12.45 | 12.29 | 13.39 | 1.00 |
| 183.0782 | 52.39  | 25.06 | 24.60 | 24.89 | 24.32 | 0.36 |
| 183.0843 | 58.92  | 21.18 | 20.29 | 20.90 | 20.57 | 1.14 |
| 183.1015 | 281.96 | 18.09 | 16.89 | 16.86 | 16.84 | 0.93 |
| 183.1128 | 213.87 | 16.88 | 14.75 | 14.94 | 15.18 | 1.62 |
| 183.1166 | 23.92  | 16.06 | 10.94 | 12.79 | 14.34 | 1.27 |
| 183.1379 | 290.5  | 17.46 | 16.51 | 16.48 | 16.42 | 0.73 |
| 183.1492 | 56.91  | 16.45 | 16.85 | 16.60 | 16.12 | 0.16 |
| 183.1743 | 203.93 | 16.40 | 13.38 | 13.46 | 14.87 | 1.23 |
| 183.5012 | 95.59  | 16.14 | 14.67 | 16.14 | 14.31 | 0.45 |
| 183.5089 | 89.17  | 15.16 | 14.64 | 15.40 | 15.19 | 0.11 |
| 183.5160 | 58.9   | 18.15 | 14.98 | 14.71 | 15.55 | 1.27 |
| 183.5321 | 99.55  | 18.77 | 20.85 | 20.65 | 19.78 | 0.91 |
| 183.5382 | 71.41  | 17.13 | 16.10 | 16.53 | 16.83 | 0.58 |
| 183.5386 | 193.23 | 14.80 | 14.84 | 15.46 | 15.45 | 0.25 |
| 183.5513 | 84.15  | 14.34 | 15.77 | 15.70 | 15.55 | 0.85 |
| 183.6011 | 25.24  | 12.40 | 15.38 | 11.57 | 15.66 | 0.55 |
| 183.9753 | 295.87 | 16.59 | 14.32 | 13.65 | 16.03 | 0.90 |
| 183.9824 | 86.65  | 10.25 | 15.53 | 14.99 | 13.37 | 1.03 |
| 184.0132 | 52.01  | 16.73 | 12.98 | 16.38 | 14.55 | 0.69 |
| 184.0278 | 131.88 | 15.56 | 15.49 | 15.88 | 14.99 | 0.00 |
| 184.0281 | 29.08  | 13.69 | 18.93 | 18.66 | 18.25 | 1.61 |
| 184.0561 | 48.81  | 17.99 | 18.70 | 18.22 | 18.21 | 0.52 |
| 184.0604 | 26.58  | 16.17 | 10.06 | 11.30 | 12.40 | 1.59 |
| 184.0732 | 26.89  | 20.22 | 21.39 | 20.95 | 20.81 | 1.00 |
| 184.0732 | 276.18 | 21.35 | 25.30 | 24.18 | 24.09 | 1.00 |
| 184.0816 | 53.01  | 21.58 | 21.31 | 21.53 | 20.85 | 0.24 |
| 184.0967 | 287.38 | 20.08 | 17.37 | 14.25 | 18.35 | 1.11 |
| 184.1007 | 23.75  | 15.82 | 17.58 | 14.03 | 18.35 | 0.20 |
| 184.1065 | 209.1  | 15.61 | 10.27 | 11.30 | 11.07 | 1.48 |
| 184.1113 | 24.82  | 15.93 | 19.13 | 15.88 | 18.82 | 0.65 |
| 184.1332 | 155.24 | 17.74 | 15.64 | 15.97 | 16.27 | 1.17 |
| 184.4950 | 267.94 | 16.02 | 15.26 | 16.25 | 15.91 | 0.13 |
| 184.5043 | 88.37  | 15.66 | 15.19 | 16.02 | 14.93 | 0.13 |
| 184.5163 | 60.51  | 17.32 | 12.52 | 14.10 | 14.42 | 1.22 |
| 184.5351 | 82.13  | 17.07 | 15.71 | 16.76 | 16.12 | 0.41 |
| 184.5485 | 91.74  | 16.47 | 16.08 | 16.06 | 15.84 | 0.46 |
| 184.5548 | 74.27  | 17.62 | 16.50 | 16.49 | 16.69 | 1.35 |
| 184.6024 | 23.79  | 13.93 | 14.91 | 12.26 | 16.13 | 0.07 |
| 184.6130 | 24.5   | 14.97 | 16.54 | 14.20 | 16.83 | 0.35 |
| 184.8741 | 112.71 | 16.34 | 16.01 | 17.29 | 15.43 | 0.04 |
| 184.9696 | 91.59  | 17.52 | 19.23 | 19.97 | 19.00 | 1.11 |
| 184.9778 | 67.4   | 16.25 | 17.37 | 18.55 | 16.87 | 1.25 |
| 184.9855 | 138.2  | 18.48 | 14.76 | 13.91 | 16.78 | 1.66 |
| 184.9961 | 89.06  | 20.28 | 23.42 | 23.64 | 22.83 | 1.37 |

|          |        |       |       |       |       |      |
|----------|--------|-------|-------|-------|-------|------|
| 185.0006 | 55.4   | 19.07 | 17.04 | 18.52 | 16.68 | 0.77 |
| 185.0234 | 86.83  | 18.24 | 16.39 | 16.90 | 17.22 | 1.05 |
| 185.0322 | 71.45  | 21.02 | 21.73 | 21.89 | 21.57 | 0.65 |
| 185.0396 | 40.96  | 16.55 | 12.24 | 15.76 | 13.36 | 0.92 |
| 185.0438 | 77.98  | 16.46 | 16.28 | 16.55 | 16.33 | 0.05 |
| 185.0484 | 24.5   | 13.34 | 15.79 | 13.11 | 16.84 | 0.59 |
| 185.0705 | 108.93 | 19.62 | 20.42 | 20.33 | 19.90 | 0.79 |
| 185.0766 | 277.66 | 16.79 | 21.01 | 18.21 | 19.61 | 0.79 |
| 185.0766 | 93.06  | 23.54 | 24.46 | 24.52 | 24.02 | 1.07 |
| 185.0829 | 52.97  | 17.95 | 16.19 | 16.56 | 16.23 | 1.23 |
| 185.0920 | 290.74 | 18.87 | 16.91 | 16.93 | 17.19 | 1.21 |
| 185.0921 | 20.31  | 18.21 | 13.77 | 13.93 | 15.02 | 2.00 |
| 185.0986 | 49.07  | 18.85 | 17.60 | 18.59 | 18.03 | 0.82 |
| 185.1008 | 202.97 | 16.15 | 14.07 | 14.19 | 14.39 | 1.36 |
| 185.1085 | 25.59  | 15.70 | 16.56 | 14.99 | 16.88 | 0.20 |
| 185.1166 | 270.71 | 16.38 | 12.29 | 14.62 | 13.85 | 1.02 |
| 185.1284 | 55.85  | 18.06 | 18.81 | 18.69 | 18.54 | 0.77 |
| 185.1285 | 186.79 | 16.86 | 14.61 | 14.87 | 14.83 | 1.59 |
| 185.1323 | 23.72  | 17.16 | 14.02 | 14.43 | 15.36 | 1.40 |
| 185.1535 | 20.68  | 17.24 | 14.86 | 13.57 | 15.46 | 1.49 |
| 185.1535 | 286.37 | 17.77 | 16.43 | 16.28 | 16.58 | 0.99 |
| 185.4943 | 103.8  | 18.44 | 9.96  | 12.63 | 11.72 | 1.62 |
| 185.5141 | 272.89 | 19.59 | 21.24 | 21.77 | 20.72 | 1.47 |
| 185.5202 | 86.8   | 15.50 | 16.03 | 16.49 | 15.86 | 0.59 |
| 185.5405 | 219.12 | 15.54 | 15.19 | 16.07 | 17.43 | 0.11 |
| 185.5584 | 83.52  | 15.03 | 15.69 | 15.72 | 15.74 | 0.66 |
| 185.6209 | 23.03  | 13.90 | 15.64 | 14.77 | 15.80 | 0.59 |
| 185.6301 | 57.19  | 16.30 | 15.47 | 15.23 | 15.63 | 0.70 |
| 185.9475 | 111.23 | 15.12 | 10.80 | 13.73 | 12.46 | 0.86 |
| 185.9597 | 55.22  | 25.52 | 25.50 | 25.93 | 25.21 | 0.11 |
| 185.9835 | 24.38  | 18.62 | 17.91 | 18.63 | 17.98 | 0.47 |
| 185.9903 | 105.32 | 16.07 | 18.41 | 15.68 | 18.11 | 0.54 |
| 185.9969 | 86.86  | 17.75 | 20.10 | 20.43 | 19.69 | 1.37 |
| 186.0074 | 135.25 | 16.70 | 14.24 | 14.26 | 14.72 | 1.59 |
| 186.0080 | 49.11  | 17.10 | 16.52 | 18.20 | 16.77 | 0.06 |
| 186.0161 | 259.13 | 16.77 | 17.46 | 18.20 | 16.98 | 0.86 |
| 186.0357 | 68.7   | 17.13 | 16.62 | 16.78 | 16.71 | 0.46 |
| 186.0422 | 218.72 | 16.83 | 16.55 | 17.89 | 18.05 | 0.19 |
| 186.0499 | 80.41  | 17.00 | 16.12 | 16.27 | 16.60 | 0.55 |
| 186.0588 | 74.65  | 18.29 | 20.38 | 20.53 | 19.99 | 1.49 |
| 186.0643 | 243.13 | 17.61 | 20.30 | 20.39 | 19.82 | 1.42 |
| 186.0657 | 77.02  | 12.54 | 13.37 | 15.70 | 11.56 | 0.44 |
| 186.0759 | 276.29 | 21.35 | 19.96 | 20.31 | 19.74 | 0.59 |
| 186.0855 | 287.92 | 18.59 | 16.83 | 16.82 | 16.26 | 1.13 |
| 186.0914 | 207.05 | 16.30 | 13.67 | 13.93 | 14.07 | 1.28 |
| 186.0950 | 216.27 | 16.75 | 13.06 | 13.01 | 14.27 | 1.57 |
| 186.1059 | 154.55 | 16.50 | 20.09 | 16.01 | 19.72 | 0.54 |
| 186.1124 | 283.06 | 19.38 | 17.38 | 17.31 | 17.56 | 1.23 |
| 186.1172 | 38.14  | 16.75 | 15.77 | 15.78 | 16.29 | 0.41 |
| 186.1221 | 267.9  | 16.41 | 14.36 | 14.70 | 13.75 | 0.99 |
| 186.1269 | 24.27  | 13.84 | 15.36 | 12.52 | 15.64 | 0.21 |
| 186.1488 | 185.08 | 16.86 | 13.90 | 14.43 | 14.79 | 1.64 |
| 186.1489 | 22.91  | 16.35 | 13.01 | 13.17 | 14.32 | 1.69 |
| 186.1853 | 133.41 | 17.63 | 16.18 | 16.40 | 16.72 | 1.20 |
| 186.4926 | 101.67 | 16.99 | 9.39  | 10.24 | 10.64 | 1.89 |
| 186.5438 | 221.11 | 14.55 | 15.46 | 16.55 | 16.16 | 0.46 |

|          |        |       |       |       |       |      |
|----------|--------|-------|-------|-------|-------|------|
| 186.5491 | 66.53  | 17.99 | 18.98 | 19.56 | 18.83 | 1.01 |
| 186.5605 | 82.75  | 15.66 | 16.10 | 15.94 | 15.80 | 0.26 |
| 186.5660 | 224.05 | 15.78 | 16.74 | 16.31 | 16.51 | 0.79 |
| 186.5670 | 79.61  | 12.91 | 15.42 | 14.72 | 16.06 | 1.03 |
| 186.8282 | 57.65  | 19.97 | 18.67 | 18.79 | 18.46 | 1.24 |
| 186.9170 | 45.89  | 14.60 | 13.63 | 15.53 | 14.58 | 0.07 |
| 186.9561 | 302.49 | 17.57 | 12.67 | 10.51 | 15.40 | 1.19 |
| 186.9580 | 51.12  | 18.61 | 18.30 | 18.87 | 18.01 | 0.14 |
| 186.9630 | 63.78  | 19.99 | 19.82 | 20.35 | 19.41 | 0.04 |
| 186.9675 | 78.52  | 16.67 | 16.22 | 15.89 | 15.55 | 0.48 |
| 186.9934 | 77.38  | 17.94 | 20.36 | 20.73 | 19.99 | 1.42 |
| 187.0004 | 270.23 | 16.30 | 15.94 | 16.32 | 14.23 | 0.25 |
| 187.0119 | 94.19  | 16.14 | 15.72 | 16.70 | 15.51 | 0.06 |
| 187.0138 | 289    | 16.22 | 14.78 | 14.83 | 14.56 | 0.88 |
| 187.0189 | 41.8   | 16.48 | 15.72 | 17.10 | 15.98 | 0.13 |
| 187.0305 | 67.33  | 17.47 | 17.31 | 17.38 | 17.24 | 0.15 |
| 187.0373 | 236.87 | 15.51 | 15.71 | 17.18 | 15.34 | 0.35 |
| 187.0561 | 64.85  | 15.60 | 17.73 | 17.10 | 17.63 | 1.13 |
| 187.0714 | 64.08  | 17.33 | 15.93 | 16.67 | 16.64 | 0.83 |
| 187.0795 | 153.59 | 18.64 | 15.67 | 15.89 | 16.31 | 1.68 |
| 187.0878 | 26.58  | 16.03 | 17.98 | 17.48 | 19.75 | 0.92 |
| 187.0972 | 180.16 | 16.43 | 15.13 | 14.84 | 15.27 | 1.26 |
| 187.1030 | 58.88  | 15.85 | 14.44 | 15.65 | 15.00 | 0.61 |
| 187.1090 | 280.85 | 13.28 | 13.41 | 15.30 | 12.65 | 0.21 |
| 187.1091 | 180.14 | 13.85 | 13.77 | 15.45 | 14.01 | 0.26 |
| 187.1174 | 177.68 | 17.05 | 14.87 | 14.81 | 15.24 | 1.64 |
| 187.1262 | 286.95 | 19.15 | 18.29 | 18.21 | 18.10 | 0.64 |
| 187.1441 | 186.14 | 16.41 | 14.82 | 14.96 | 15.19 | 1.19 |
| 187.1480 | 23.78  | 18.06 | 15.14 | 15.85 | 16.86 | 1.51 |
| 187.1481 | 178.61 | 17.54 | 14.83 | 15.46 | 15.37 | 1.58 |
| 187.5472 | 121.2  | 17.14 | 13.82 | 14.50 | 14.00 | 1.60 |
| 187.5613 | 83.45  | 14.29 | 16.10 | 16.18 | 15.65 | 1.20 |
| 187.5895 | 26.45  | 14.37 | 14.23 | 14.96 | 17.28 | 0.21 |
| 187.6036 | 24.67  | 13.94 | 16.05 | 12.90 | 16.69 | 0.39 |
| 187.9567 | 61.17  | 22.12 | 22.25 | 22.70 | 21.75 | 0.23 |
| 187.9639 | 52.68  | 17.91 | 17.48 | 18.03 | 17.38 | 0.29 |
| 187.9709 | 96.88  | 17.39 | 13.84 | 15.48 | 14.96 | 1.35 |
| 188.0006 | 45.14  | 20.24 | 12.35 | 12.97 | 15.14 | 1.70 |
| 188.0138 | 54.79  | 14.71 | 14.64 | 15.21 | 15.58 | 0.16 |
| 188.0364 | 60.67  | 17.96 | 16.85 | 18.51 | 18.64 | 0.18 |
| 188.0554 | 161.97 | 16.89 | 15.78 | 14.97 | 16.82 | 0.83 |
| 188.0706 | 46.41  | 25.30 | 24.39 | 24.72 | 24.70 | 1.25 |
| 188.0956 | 25.87  | 14.98 | 16.40 | 16.00 | 18.36 | 0.79 |
| 188.1017 | 61.27  | 18.01 | 18.01 | 18.47 | 18.16 | 0.20 |
| 188.1108 | 195    | 15.82 | 10.85 | 10.70 | 11.58 | 1.27 |
| 188.1155 | 61.19  | 17.07 | 18.04 | 18.14 | 17.64 | 0.99 |
| 188.1280 | 274.15 | 18.35 | 16.36 | 16.19 | 16.53 | 1.48 |
| 188.1280 | 155.89 | 18.51 | 16.77 | 16.61 | 17.45 | 1.41 |
| 188.1758 | 36.32  | 18.49 | 21.47 | 21.30 | 20.58 | 1.79 |
| 188.4810 | 106.99 | 18.14 | 10.30 | 14.02 | 10.66 | 1.44 |
| 188.5146 | 86.04  | 18.04 | 14.81 | 14.88 | 14.42 | 1.16 |
| 188.5152 | 291.64 | 13.62 | 14.75 | 14.87 | 11.76 | 0.29 |
| 188.5686 | 89.04  | 17.45 | 17.80 | 18.13 | 17.51 | 0.55 |
| 188.6115 | 24.6   | 14.82 | 17.76 | 16.14 | 19.03 | 1.05 |
| 188.6172 | 61.21  | 15.63 | 14.99 | 15.64 | 14.71 | 0.27 |
| 188.8252 | 47.89  | 19.46 | 18.01 | 18.08 | 17.80 | 1.32 |



|          |        |       |       |       |       |      |
|----------|--------|-------|-------|-------|-------|------|
| 188.9183 | 270.19 | 16.84 | 8.36  | 8.34  | 10.02 | 1.47 |
| 188.9612 | 51.21  | 16.22 | 15.35 | 15.64 | 14.82 | 0.45 |
| 189.0002 | 78.58  | 16.93 | 15.20 | 16.03 | 15.59 | 0.51 |
| 189.0061 | 41.51  | 15.77 | 18.55 | 17.65 | 17.93 | 1.15 |
| 189.0113 | 288.67 | 12.62 | 16.30 | 16.36 | 15.26 | 1.41 |
| 189.0180 | 72.15  | 19.48 | 22.70 | 22.61 | 22.23 | 1.64 |
| 189.0312 | 31.73  | 15.85 | 14.44 | 13.96 | 14.72 | 0.57 |
| 189.0410 | 42.69  | 15.66 | 16.19 | 16.29 | 15.11 | 0.22 |
| 189.0470 | 44.24  | 16.74 | 15.19 | 16.04 | 16.05 | 0.73 |
| 189.0523 | 33.37  | 15.64 | 16.62 | 16.69 | 16.55 | 0.39 |
| 189.0583 | 67.56  | 15.91 | 15.88 | 15.95 | 16.32 | 0.03 |
| 189.0716 | 65.66  | 22.42 | 22.22 | 22.47 | 22.15 | 0.23 |
| 189.0862 | 294.79 | 17.06 | 16.34 | 16.29 | 15.56 | 0.61 |
| 189.0863 | 196.18 | 18.24 | 15.80 | 16.13 | 15.94 | 1.57 |
| 189.0912 | 176.72 | 16.74 | 14.37 | 14.50 | 15.02 | 1.50 |
| 189.0949 | 290.98 | 19.44 | 20.27 | 20.09 | 20.58 | 0.38 |
| 189.1034 | 24.39  | 13.44 | 16.64 | 14.69 | 17.95 | 0.89 |
| 189.1133 | 22.03  | 17.80 | 14.80 | 14.33 | 16.49 | 1.66 |
| 189.1135 | 284.5  | 18.67 | 16.38 | 16.57 | 16.58 | 1.51 |
| 189.1233 | 47.09  | 20.31 | 20.39 | 20.53 | 20.16 | 0.15 |
| 189.1274 | 167.18 | 17.29 | 15.27 | 15.21 | 15.42 | 1.38 |
| 189.1292 | 22.38  | 15.77 | 16.70 | 18.95 | 17.94 | 1.01 |
| 189.1347 | 66.94  | 18.04 | 18.69 | 18.50 | 18.36 | 0.73 |
| 189.1598 | 69.24  | 22.34 | 24.23 | 23.86 | 23.73 | 1.45 |
| 189.1636 | 24.01  | 18.95 | 16.33 | 17.08 | 17.79 | 1.52 |
| 189.1638 | 155.25 | 18.10 | 15.98 | 16.43 | 16.77 | 1.36 |
| 189.1791 | 56.02  | 15.60 | 17.48 | 17.06 | 16.71 | 1.27 |
| 189.4823 | 267.96 | 17.19 | 11.25 | 11.74 | 13.12 | 1.24 |
| 189.5273 | 95.4   | 16.61 | 14.02 | 16.23 | 15.26 | 0.73 |
| 189.5286 | 32.58  | 13.19 | 16.70 | 10.26 | 10.78 | 0.07 |
| 189.5318 | 88.87  | 18.36 | 22.02 | 22.87 | 21.35 | 1.49 |
| 189.5587 | 97.26  | 17.41 | 10.07 | 11.82 | 12.06 | 1.60 |
| 189.5706 | 88.63  | 17.37 | 17.58 | 17.89 | 17.25 | 0.35 |
| 189.6194 | 20.47  | 15.41 | 15.76 | 14.30 | 16.73 | 0.03 |
| 189.6320 | 23.47  | 14.56 | 13.63 | 16.15 | 15.53 | 0.14 |
| 189.9536 | 51.42  | 16.94 | 16.23 | 16.58 | 15.92 | 0.60 |
| 189.9897 | 110.01 | 16.72 | 14.76 | 13.68 | 13.44 | 1.17 |
| 190.0023 | 81.19  | 17.99 | 16.22 | 17.12 | 16.76 | 1.17 |
| 190.0126 | 43.07  | 18.22 | 16.86 | 17.68 | 17.53 | 0.74 |
| 190.0192 | 82.97  | 17.58 | 19.53 | 19.42 | 19.20 | 1.41 |
| 190.0256 | 51.85  | 17.29 | 16.63 | 16.42 | 16.73 | 0.68 |
| 190.0318 | 87.47  | 16.83 | 18.70 | 19.62 | 18.43 | 1.24 |
| 190.0396 | 85.88  | 14.99 | 17.14 | 15.07 | 16.42 | 0.71 |
| 190.0709 | 285.61 | 19.53 | 17.78 | 17.59 | 17.87 | 1.01 |
| 190.0774 | 39.04  | 17.47 | 15.44 | 16.01 | 16.17 | 1.64 |
| 190.0821 | 73.81  | 15.49 | 14.54 | 14.26 | 15.74 | 0.42 |
| 190.0864 | 195.21 | 16.99 | 14.43 | 14.82 | 14.95 | 1.61 |
| 190.0894 | 281.03 | 19.00 | 17.03 | 16.76 | 16.20 | 1.12 |
| 190.0984 | 291.47 | 18.71 | 16.86 | 16.50 | 17.01 | 1.12 |
| 190.1072 | 289.62 | 18.71 | 19.27 | 19.18 | 19.15 | 0.26 |
| 190.1187 | 66.27  | 18.11 | 18.61 | 18.25 | 18.00 | 0.35 |
| 190.1283 | 35.02  | 14.69 | 15.48 | 15.94 | 16.45 | 0.61 |
| 190.1381 | 35.84  | 14.29 | 16.74 | 17.04 | 16.37 | 1.31 |
| 190.1437 | 46.67  | 17.55 | 15.46 | 16.03 | 16.12 | 1.24 |
| 190.1568 | 64.03  | 15.63 | 15.81 | 15.76 | 15.62 | 0.11 |
| 190.1631 | 68.62  | 18.74 | 20.66 | 20.39 | 20.07 | 1.30 |

|          |        |       |       |       |       |      |
|----------|--------|-------|-------|-------|-------|------|
| 190.1670 | 22.98  | 16.00 | 10.32 | 11.67 | 13.21 | 1.17 |
| 190.4552 | 90.17  | 15.67 | 15.44 | 15.41 | 15.05 | 0.16 |
| 190.4989 | 93.98  | 14.76 | 15.34 | 16.69 | 15.36 | 0.49 |
| 190.5084 | 99.46  | 19.63 | 10.72 | 14.02 | 11.98 | 1.52 |
| 190.5119 | 136.33 | 15.81 | 15.81 | 16.14 | 15.94 | 0.07 |
| 190.5306 | 86.07  | 16.61 | 18.84 | 19.84 | 18.67 | 1.42 |
| 190.5340 | 86.19  | 15.13 | 16.38 | 17.10 | 16.23 | 1.02 |
| 190.5983 | 25.04  | 14.92 | 15.28 | 13.89 | 16.84 | 0.03 |
| 190.6271 | 24.12  | 12.09 | 14.56 | 11.11 | 15.43 | 0.44 |
| 190.8232 | 45.33  | 17.31 | 14.45 | 14.69 | 14.86 | 1.69 |
| 190.9119 | 47.01  | 19.51 | 19.74 | 20.02 | 19.89 | 0.54 |
| 190.9630 | 263.07 | 17.36 | 15.66 | 15.25 | 16.00 | 1.17 |
| 190.9793 | 291.2  | 17.61 | 15.29 | 15.70 | 15.25 | 1.04 |
| 190.9966 | 39.75  | 17.23 | 16.90 | 16.87 | 17.71 | 0.25 |
| 191.0039 | 156.02 | 13.63 | 14.00 | 13.63 | 13.13 | 0.04 |
| 191.0103 | 278.95 | 16.20 | 19.45 | 19.96 | 18.56 | 1.66 |
| 191.0153 | 86.02  | 17.27 | 19.38 | 19.15 | 19.07 | 1.39 |
| 191.0222 | 249.47 | 17.67 | 16.67 | 17.11 | 17.48 | 0.61 |
| 191.0324 | 81.95  | 16.02 | 17.16 | 16.21 | 15.68 | 0.29 |
| 191.0399 | 76.59  | 21.03 | 19.74 | 19.58 | 19.84 | 1.13 |
| 191.0485 | 196.37 | 15.93 | 16.98 | 17.61 | 18.53 | 0.62 |
| 191.0492 | 63.1   | 15.23 | 16.06 | 15.62 | 16.31 | 0.45 |
| 191.0663 | 153.2  | 15.50 | 15.49 | 14.20 | 15.00 | 0.26 |
| 191.0704 | 192.18 | 16.49 | 14.88 | 15.18 | 15.40 | 1.34 |
| 191.0816 | 161.81 | 17.44 | 14.37 | 14.22 | 15.34 | 1.76 |
| 191.0929 | 176.66 | 17.11 | 14.70 | 14.63 | 15.32 | 1.75 |
| 191.0930 | 31.41  | 17.47 | 17.72 | 17.77 | 16.67 | 0.09 |
| 191.0976 | 32.95  | 17.10 | 16.83 | 17.03 | 17.00 | 0.07 |
| 191.1017 | 270.89 | 22.21 | 20.65 | 20.44 | 20.70 | 0.81 |
| 191.1020 | 140.83 | 20.65 | 19.08 | 18.95 | 19.59 | 0.92 |
| 191.1066 | 286.06 | 17.41 | 16.19 | 16.34 | 16.16 | 0.94 |
| 191.1119 | 273.25 | 17.09 | 15.38 | 15.37 | 15.78 | 1.21 |
| 191.1292 | 204.58 | 16.34 | 13.53 | 14.59 | 14.31 | 0.85 |
| 191.1387 | 64.83  | 18.10 | 19.16 | 19.04 | 18.63 | 1.03 |
| 191.1429 | 22.93  | 17.22 | 14.19 | 14.78 | 15.18 | 1.79 |
| 191.1429 | 287.88 | 17.54 | 16.28 | 16.34 | 16.23 | 1.08 |
| 191.1665 | 63.52  | 14.72 | 14.24 | 13.65 | 14.22 | 0.52 |
| 191.1793 | 23.79  | 17.00 | 14.57 | 14.63 | 15.69 | 1.66 |
| 191.1795 | 170.57 | 17.39 | 14.91 | 14.88 | 15.62 | 1.53 |
| 191.4766 | 107.13 | 16.48 | 15.01 | 14.49 | 15.01 | 1.17 |
| 191.4900 | 103.08 | 14.77 | 14.89 | 15.51 | 14.45 | 0.16 |
| 191.4988 | 90.7   | 15.89 | 15.73 | 16.16 | 15.62 | 0.01 |
| 191.5153 | 87.01  | 15.50 | 16.65 | 17.09 | 16.69 | 0.88 |
| 191.5365 | 102.36 | 16.88 | 14.92 | 15.04 | 15.53 | 1.22 |
| 191.5405 | 80.06  | 16.71 | 16.36 | 15.96 | 15.61 | 0.27 |
| 191.5502 | 204.05 | 16.95 | 18.49 | 18.31 | 18.88 | 1.01 |
| 191.6061 | 24.81  | 16.18 | 18.47 | 17.47 | 19.78 | 1.04 |
| 191.9346 | 278.69 | 17.89 | 15.13 | 14.61 | 16.57 | 1.29 |
| 191.9823 | 50.54  | 17.30 | 14.97 | 15.38 | 14.91 | 0.89 |
| 191.9915 | 121    | 17.23 | 11.32 | 11.98 | 12.48 | 1.98 |
| 191.9944 | 130.23 | 16.91 | 15.98 | 16.81 | 15.64 | 0.57 |
| 192.0091 | 42.99  | 15.51 | 13.82 | 16.85 | 15.99 | 0.08 |
| 192.0146 | 56.05  | 19.46 | 19.43 | 19.74 | 19.48 | 0.14 |
| 192.0243 | 64.82  | 20.36 | 19.78 | 20.68 | 19.77 | 0.21 |
| 192.0306 | 253.1  | 12.15 | 13.65 | 14.24 | 13.26 | 0.64 |
| 192.0325 | 160.33 | 15.69 | 14.60 | 15.47 | 15.36 | 0.44 |

|          |        |       |       |       |       |      |
|----------|--------|-------|-------|-------|-------|------|
| 192.0412 | 50.76  | 19.19 | 19.28 | 19.26 | 18.84 | 0.02 |
| 192.0437 | 66.96  | 15.62 | 16.02 | 13.47 | 15.06 | 0.26 |
| 192.0504 | 178.01 | 16.40 | 14.07 | 16.33 | 15.30 | 0.36 |
| 192.0553 | 85.09  | 19.06 | 21.77 | 21.84 | 21.35 | 1.38 |
| 192.0655 | 39.43  | 19.52 | 17.88 | 19.39 | 18.94 | 0.71 |
| 192.0655 | 213.94 | 17.43 | 14.87 | 15.04 | 15.53 | 1.74 |
| 192.0691 | 55.25  | 17.57 | 16.04 | 16.57 | 15.96 | 0.77 |
| 192.0740 | 70.89  | 14.55 | 15.54 | 13.84 | 15.10 | 0.09 |
| 192.0788 | 104.19 | 15.86 | 14.59 | 14.38 | 14.15 | 0.71 |
| 192.0866 | 293.08 | 18.18 | 16.79 | 16.78 | 16.76 | 0.83 |
| 192.0868 | 20.59  | 17.64 | 13.57 | 14.50 | 14.96 | 1.93 |
| 192.0961 | 288.11 | 18.25 | 18.25 | 17.94 | 17.74 | 0.11 |
| 192.1020 | 278.27 | 18.13 | 16.35 | 16.39 | 16.36 | 1.35 |
| 192.1050 | 283.08 | 20.36 | 19.05 | 18.80 | 19.31 | 0.77 |
| 192.1230 | 159.29 | 16.30 | 15.03 | 13.99 | 14.98 | 1.28 |
| 192.1230 | 55.97  | 17.35 | 17.88 | 15.77 | 16.36 | 0.31 |
| 192.1383 | 259.22 | 17.90 | 16.46 | 16.15 | 16.79 | 1.40 |
| 192.5565 | 86.85  | 16.75 | 18.37 | 18.47 | 18.28 | 1.02 |
| 192.6140 | 24.33  | 13.61 | 14.48 | 12.77 | 16.42 | 0.20 |
| 192.6226 | 23.78  | 14.56 | 12.41 | 16.16 | 15.31 | 0.12 |
| 192.8886 | 108.8  | 18.84 | 12.96 | 14.65 | 13.59 | 1.56 |
| 192.8886 | 267.11 | 17.91 | 12.21 | 12.76 | 13.72 | 1.25 |
| 192.9104 | 34.91  | 17.00 | 16.45 | 16.55 | 16.69 | 0.48 |
| 192.9330 | 258.29 | 19.21 | 15.95 | 15.50 | 17.17 | 1.59 |
| 192.9400 | 292.87 | 17.23 | 11.90 | 12.42 | 14.21 | 1.76 |
| 192.9573 | 97.87  | 17.49 | 9.78  | 12.88 | 11.92 | 1.28 |
| 192.9749 | 97.35  | 13.84 | 15.39 | 15.71 | 14.70 | 0.63 |
| 192.9807 | 38.36  | 17.63 | 12.25 | 12.73 | 13.82 | 1.95 |
| 192.9868 | 126.92 | 12.20 | 14.31 | 12.96 | 14.46 | 0.60 |
| 192.9986 | 72.25  | 16.51 | 14.86 | 15.47 | 15.38 | 0.79 |
| 193.0038 | 41.73  | 18.23 | 17.02 | 19.15 | 18.25 | 0.17 |
| 193.0153 | 99.73  | 17.30 | 14.93 | 14.90 | 15.59 | 1.13 |
| 193.0277 | 61.43  | 16.34 | 14.47 | 15.46 | 14.52 | 0.73 |
| 193.0367 | 78.12  | 17.49 | 15.61 | 15.73 | 15.98 | 0.84 |
| 193.0464 | 89.57  | 15.86 | 16.02 | 15.93 | 16.19 | 0.16 |
| 193.0497 | 84.72  | 13.23 | 16.32 | 12.56 | 14.59 | 0.38 |
| 193.0555 | 80.28  | 17.55 | 18.95 | 18.97 | 19.01 | 1.08 |
| 193.0644 | 65.54  | 15.91 | 15.16 | 14.62 | 16.01 | 0.47 |
| 193.0682 | 74.9   | 22.41 | 22.20 | 22.20 | 22.13 | 0.35 |
| 193.0819 | 87.67  | 17.80 | 18.00 | 18.32 | 17.91 | 0.27 |
| 193.0859 | 177.63 | 16.77 | 14.71 | 14.66 | 15.39 | 1.63 |
| 193.0971 | 169.77 | 16.99 | 14.10 | 14.17 | 15.04 | 1.78 |
| 193.1085 | 201.03 | 16.69 | 14.13 | 14.67 | 14.38 | 1.63 |
| 193.1166 | 25.25  | 15.11 | 16.33 | 12.68 | 16.54 | 0.05 |
| 193.1184 | 204.18 | 16.31 | 11.01 | 13.28 | 12.13 | 1.56 |
| 193.1222 | 23.27  | 17.82 | 16.47 | 16.96 | 17.03 | 1.18 |
| 193.1222 | 292.15 | 18.77 | 18.03 | 18.20 | 18.00 | 0.41 |
| 193.1312 | 53.72  | 18.27 | 17.17 | 17.42 | 17.16 | 1.53 |
| 193.1586 | 23.19  | 17.32 | 15.32 | 16.12 | 16.36 | 1.39 |
| 193.1587 | 161.59 | 17.92 | 17.02 | 16.99 | 17.48 | 0.71 |
| 193.1950 | 214.22 | 16.56 | 13.82 | 13.66 | 13.94 | 1.29 |
| 193.5122 | 250.6  | 15.13 | 15.73 | 15.18 | 14.57 | 0.08 |
| 193.5122 | 143.61 | 16.73 | 18.25 | 17.29 | 16.01 | 0.31 |
| 193.5255 | 30.49  | 15.28 | 12.82 | 16.43 | 15.57 | 0.33 |
| 193.5567 | 86.16  | 17.54 | 22.21 | 22.05 | 21.41 | 1.93 |
| 193.5669 | 74.83  | 17.12 | 15.64 | 15.36 | 15.85 | 1.31 |

|          |        |       |       |       |       |      |
|----------|--------|-------|-------|-------|-------|------|
| 193.5698 | 78.05  | 19.63 | 19.20 | 19.16 | 19.15 | 0.65 |
| 193.9299 | 275.96 | 22.37 | 21.03 | 20.15 | 22.16 | 0.85 |
| 193.9826 | 75.58  | 18.17 | 18.03 | 18.03 | 17.85 | 0.14 |
| 193.9980 | 45.76  | 20.30 | 19.38 | 19.49 | 19.14 | 1.37 |
| 194.0044 | 165.61 | 14.19 | 17.70 | 16.41 | 15.59 | 0.74 |
| 194.0223 | 50.09  | 19.26 | 19.27 | 19.83 | 19.72 | 0.41 |
| 194.0314 | 92.8   | 17.33 | 16.71 | 16.79 | 17.46 | 0.37 |
| 194.0380 | 47.79  | 16.30 | 15.14 | 14.90 | 15.35 | 0.45 |
| 194.0488 | 73.46  | 19.57 | 18.83 | 19.15 | 19.51 | 0.44 |
| 194.0577 | 88.56  | 17.30 | 19.06 | 18.91 | 18.56 | 1.42 |
| 194.0660 | 74.34  | 17.83 | 16.96 | 16.78 | 17.09 | 1.22 |
| 194.0709 | 77.42  | 16.60 | 16.07 | 16.46 | 15.93 | 0.24 |
| 194.0780 | 59.07  | 15.12 | 14.26 | 15.37 | 15.48 | 0.10 |
| 194.0811 | 289.71 | 19.70 | 18.69 | 18.34 | 18.61 | 0.55 |
| 194.0927 | 215.75 | 16.70 | 13.27 | 13.82 | 14.41 | 1.53 |
| 194.1023 | 281.67 | 18.22 | 16.20 | 16.12 | 16.35 | 1.28 |
| 194.1118 | 281.51 | 16.93 | 16.09 | 16.56 | 15.29 | 0.61 |
| 194.1175 | 290.97 | 18.43 | 17.31 | 17.43 | 17.24 | 0.79 |
| 194.1207 | 282.16 | 17.70 | 15.74 | 15.73 | 15.66 | 1.26 |
| 194.1245 | 24.74  | 16.24 | 17.83 | 15.14 | 17.88 | 0.37 |
| 194.1540 | 207.6  | 16.63 | 14.21 | 14.87 | 14.93 | 1.62 |
| 194.4993 | 96.88  | 17.66 | 9.06  | 11.21 | 11.40 | 1.75 |
| 194.5193 | 274.34 | 13.57 | 17.79 | 18.45 | 16.95 | 1.77 |
| 194.5232 | 161.97 | 13.37 | 16.24 | 15.76 | 13.60 | 0.87 |
| 194.5567 | 86.57  | 17.93 | 19.40 | 19.29 | 19.02 | 1.40 |
| 194.5639 | 84.56  | 15.44 | 17.02 | 17.00 | 16.56 | 1.20 |
| 194.6260 | 24.98  | 14.39 | 15.22 | 11.97 | 15.45 | 0.15 |
| 194.9305 | 106.42 | 17.66 | 14.37 | 13.62 | 15.94 | 1.32 |
| 194.9340 | 278.08 | 16.91 | 11.42 | 10.12 | 13.80 | 1.59 |
| 194.9457 | 39.8   | 15.97 | 17.57 | 17.65 | 17.84 | 1.45 |
| 194.9667 | 39.28  | 17.57 | 19.21 | 19.77 | 19.30 | 1.50 |
| 194.9904 | 88.53  | 19.32 | 21.67 | 21.96 | 21.36 | 1.42 |
| 195.0032 | 98.13  | 18.50 | 19.11 | 18.50 | 18.73 | 0.40 |
| 195.0049 | 171.22 | 11.36 | 13.87 | 14.77 | 13.12 | 0.79 |
| 195.0115 | 105.47 | 15.61 | 13.00 | 13.80 | 13.01 | 0.76 |
| 195.0254 | 51.81  | 14.70 | 12.82 | 14.07 | 14.48 | 0.38 |
| 195.0445 | 165.75 | 10.09 | 13.99 | 13.96 | 13.53 | 1.15 |
| 195.0471 | 91.53  | 16.74 | 14.79 | 14.82 | 15.22 | 1.17 |
| 195.0516 | 64.56  | 18.25 | 17.38 | 17.39 | 17.74 | 0.67 |
| 195.0570 | 84.84  | 18.48 | 20.81 | 20.32 | 20.36 | 1.51 |
| 195.0615 | 84.49  | 16.22 | 17.45 | 16.31 | 17.59 | 0.52 |
| 195.0654 | 81.08  | 18.26 | 21.53 | 21.49 | 20.77 | 1.75 |
| 195.0696 | 228.65 | 17.37 | 19.02 | 18.74 | 18.55 | 1.09 |
| 195.0754 | 20.86  | 16.66 | 12.10 | 12.72 | 13.67 | 1.74 |
| 195.0764 | 191.43 | 17.47 | 14.58 | 14.73 | 15.21 | 1.65 |
| 195.0876 | 283.1  | 21.19 | 18.32 | 17.60 | 18.22 | 1.18 |
| 195.0876 | 24.73  | 20.34 | 15.86 | 15.38 | 16.62 | 1.55 |
| 195.0967 | 202.82 | 15.77 | 13.36 | 13.81 | 13.74 | 0.84 |
| 195.1015 | 281.7  | 18.58 | 17.43 | 17.38 | 17.27 | 0.92 |
| 195.1128 | 283.25 | 17.16 | 15.42 | 15.46 | 15.89 | 1.11 |
| 195.1128 | 22.91  | 16.79 | 12.67 | 13.21 | 13.90 | 1.94 |
| 195.1129 | 183.17 | 17.82 | 14.89 | 14.80 | 15.78 | 1.55 |
| 195.1227 | 263.4  | 17.45 | 16.70 | 16.39 | 16.83 | 0.94 |
| 195.1379 | 282.55 | 19.50 | 17.89 | 17.91 | 17.97 | 1.02 |
| 195.1743 | 20.62  | 16.72 | 13.41 | 13.84 | 14.42 | 1.83 |
| 195.1744 | 171.61 | 17.77 | 15.00 | 15.06 | 15.78 | 1.52 |

|          |        |       |       |       |       |      |
|----------|--------|-------|-------|-------|-------|------|
| 195.5447 | 81.85  | 14.83 | 12.53 | 14.65 | 15.46 | 0.37 |
| 195.5586 | 85.37  | 16.46 | 16.73 | 16.28 | 16.63 | 0.07 |
| 195.5659 | 83.48  | 15.67 | 17.74 | 17.74 | 16.90 | 1.05 |
| 195.5714 | 215.98 | 14.50 | 14.68 | 14.17 | 14.83 | 0.00 |
| 195.9304 | 241.13 | 19.69 | 16.61 | 15.65 | 18.71 | 1.37 |
| 195.9586 | 280.79 | 17.47 | 19.17 | 19.32 | 18.29 | 1.37 |
| 195.9681 | 278.72 | 23.65 | 23.04 | 23.00 | 22.88 | 0.32 |
| 195.9773 | 60.95  | 16.71 | 12.80 | 15.08 | 14.34 | 1.05 |
| 195.9855 | 101.59 | 16.80 | 16.23 | 17.48 | 16.40 | 0.05 |
| 195.9935 | 279.44 | 17.28 | 11.15 | 8.73  | 12.81 | 1.68 |
| 195.9938 | 54.5   | 17.84 | 18.89 | 19.60 | 18.86 | 1.30 |
| 196.0129 | 36.69  | 18.55 | 19.40 | 21.02 | 18.53 | 0.83 |
| 196.0191 | 290.48 | 15.70 | 15.75 | 16.15 | 14.85 | 0.05 |
| 196.0419 | 76.03  | 17.36 | 17.14 | 15.60 | 16.41 | 0.41 |
| 196.0561 | 85.79  | 17.26 | 17.28 | 17.05 | 17.22 | 0.09 |
| 196.0604 | 168.91 | 17.66 | 14.86 | 14.62 | 15.55 | 1.60 |
| 196.0625 | 95.49  | 16.05 | 18.51 | 18.34 | 17.87 | 1.55 |
| 196.0675 | 84.76  | 15.45 | 14.98 | 15.32 | 14.90 | 0.25 |
| 196.0734 | 46.37  | 20.27 | 21.15 | 21.61 | 21.26 | 1.10 |
| 196.0956 | 282.72 | 16.52 | 13.82 | 13.13 | 15.08 | 0.91 |
| 196.1000 | 23.75  | 16.50 | 11.21 | 11.63 | 12.28 | 1.91 |
| 196.1070 | 201.59 | 15.36 | 9.20  | 9.36  | 10.25 | 1.57 |
| 196.1112 | 24.58  | 14.59 | 17.54 | 13.79 | 17.24 | 0.44 |
| 196.1333 | 180.07 | 17.26 | 14.76 | 15.13 | 15.26 | 1.50 |
| 196.1413 | 170.05 | 16.40 | 12.69 | 12.57 | 12.56 | 1.28 |
| 196.5147 | 36.68  | 14.43 | 15.85 | 17.81 | 14.82 | 0.82 |
| 196.5574 | 86.81  | 20.15 | 18.46 | 18.90 | 18.31 | 1.07 |
| 196.5668 | 84.8   | 16.48 | 20.55 | 20.07 | 19.09 | 1.82 |
| 196.5948 | 26.75  | 15.49 | 16.00 | 16.64 | 18.01 | 0.48 |
| 196.6089 | 24.88  | 12.54 | 15.48 | 11.27 | 16.26 | 0.48 |
| 196.6963 | 241.14 | 15.87 | 14.72 | 16.39 | 14.98 | 0.29 |
| 196.8570 | 50.38  | 18.82 | 19.45 | 19.44 | 19.20 | 0.71 |
| 196.8650 | 49.94  | 17.10 | 17.97 | 18.07 | 18.16 | 0.55 |
| 196.8778 | 101.73 | 16.13 | 19.89 | 16.99 | 19.68 | 1.07 |
| 196.9283 | 99.64  | 18.59 | 15.63 | 16.50 | 15.79 | 0.98 |
| 196.9521 | 267.71 | 19.19 | 18.72 | 19.35 | 19.21 | 0.12 |
| 196.9587 | 47.08  | 15.19 | 12.37 | 15.13 | 13.68 | 0.61 |
| 196.9634 | 91.26  | 17.12 | 16.02 | 16.36 | 15.76 | 0.77 |
| 196.9716 | 126.79 | 17.95 | 16.75 | 17.83 | 16.52 | 0.62 |
| 196.9836 | 42.06  | 18.59 | 17.70 | 18.69 | 18.93 | 0.27 |
| 196.9879 | 85.24  | 16.90 | 18.32 | 18.67 | 18.23 | 1.19 |
| 197.0025 | 32.71  | 20.58 | 12.31 | 14.80 | 16.46 | 1.76 |
| 197.0409 | 75.3   | 17.24 | 16.19 | 16.29 | 16.93 | 0.65 |
| 197.0484 | 24.77  | 11.90 | 15.36 | 11.54 | 16.27 | 0.57 |
| 197.0559 | 121.68 | 14.59 | 16.66 | 16.17 | 15.37 | 0.80 |
| 197.0590 | 84.6   | 22.79 | 21.68 | 22.12 | 21.44 | 0.69 |
| 197.0674 | 85.05  | 15.60 | 16.62 | 16.43 | 15.95 | 0.82 |
| 197.0767 | 46.11  | 16.83 | 16.80 | 17.39 | 17.24 | 0.24 |
| 197.0810 | 200.96 | 16.30 | 13.20 | 14.04 | 14.04 | 1.30 |
| 197.0926 | 286.66 | 17.90 | 14.90 | 13.46 | 15.76 | 1.30 |
| 197.1009 | 65.39  | 16.75 | 15.54 | 15.97 | 17.22 | 0.56 |
| 197.1124 | 199.43 | 17.47 | 13.96 | 14.27 | 14.78 | 1.80 |
| 197.1173 | 158.98 | 18.25 | 11.87 | 12.78 | 12.90 | 1.97 |
| 197.1188 | 26.52  | 18.71 | 22.30 | 20.24 | 22.13 | 1.27 |
| 197.1284 | 209.01 | 16.93 | 14.79 | 14.88 | 15.11 | 1.51 |
| 197.1535 | 23.9   | 17.10 | 14.82 | 14.60 | 15.20 | 1.68 |

|          |        |       |       |       |       |      |
|----------|--------|-------|-------|-------|-------|------|
| 197.1535 | 292.16 | 17.74 | 16.69 | 16.61 | 16.55 | 0.87 |
| 197.1900 | 201.91 | 16.48 | 13.53 | 13.59 | 14.71 | 1.52 |
| 197.5206 | 266.75 | 16.99 | 18.76 | 18.21 | 17.77 | 0.71 |
| 197.5657 | 85.51  | 14.89 | 17.02 | 16.54 | 16.06 | 1.57 |
| 197.5738 | 78.36  | 17.27 | 16.88 | 16.60 | 16.79 | 0.36 |
| 197.6167 | 24.67  | 11.30 | 12.58 | 9.53  | 15.07 | 0.16 |
| 197.6208 | 24.24  | 16.99 | 19.96 | 17.94 | 20.04 | 1.17 |
| 197.6349 | 24.1   | 13.34 | 16.05 | 13.24 | 16.93 | 0.64 |
| 197.6438 | 20.1   | 11.04 | 13.37 | 14.34 | 13.28 | 0.85 |
| 197.7072 | 94.6   | 19.05 | 12.77 | 14.21 | 13.74 | 1.69 |
| 197.9259 | 131.63 | 18.50 | 15.66 | 15.98 | 17.28 | 1.28 |
| 197.9518 | 58.14  | 18.80 | 13.19 | 13.56 | 15.72 | 1.48 |
| 197.9644 | 124    | 15.49 | 14.28 | 15.03 | 14.91 | 0.54 |
| 197.9725 | 126.07 | 17.18 | 15.12 | 16.10 | 15.39 | 1.21 |
| 197.9808 | 48.33  | 15.79 | 17.13 | 16.65 | 17.20 | 0.85 |
| 198.0013 | 94.91  | 15.87 | 18.28 | 18.81 | 17.96 | 1.28 |
| 198.0076 | 29.49  | 11.76 | 16.37 | 18.16 | 17.61 | 1.52 |
| 198.0185 | 97.62  | 16.59 | 14.64 | 15.84 | 15.38 | 0.55 |
| 198.0229 | 104.67 | 19.12 | 17.03 | 18.30 | 17.10 | 0.91 |
| 198.0284 | 94.11  | 14.51 | 15.43 | 13.91 | 14.38 | 0.06 |
| 198.0373 | 86.74  | 15.37 | 16.20 | 16.10 | 16.14 | 0.64 |
| 198.0438 | 28.84  | 15.76 | 16.78 | 16.06 | 17.04 | 0.45 |
| 198.0528 | 192.95 | 17.03 | 19.58 | 15.42 | 18.16 | 0.22 |
| 198.0531 | 93.63  | 22.75 | 22.83 | 23.02 | 22.66 | 0.18 |
| 198.0612 | 94.69  | 17.49 | 14.57 | 15.12 | 14.78 | 1.47 |
| 198.0715 | 45.91  | 15.46 | 16.40 | 17.03 | 16.90 | 1.03 |
| 198.0758 | 120.18 | 21.98 | 20.36 | 20.41 | 20.57 | 1.08 |
| 198.0867 | 69.41  | 20.78 | 20.35 | 20.18 | 20.42 | 0.72 |
| 198.0976 | 30.5   | 26.55 | 25.54 | 25.56 | 25.45 | 0.73 |
| 198.1123 | 286.63 | 17.54 | 16.19 | 16.39 | 16.24 | 1.23 |
| 198.1219 | 282.26 | 17.46 | 16.79 | 17.35 | 15.53 | 0.47 |
| 198.1224 | 20.08  | 16.45 | 15.33 | 14.75 | 16.33 | 0.86 |
| 198.1270 | 22.94  | 18.43 | 21.67 | 19.71 | 21.50 | 1.29 |
| 198.1489 | 169.56 | 17.47 | 15.21 | 15.50 | 15.59 | 1.38 |
| 198.4441 | 105    | 15.67 | 12.89 | 14.98 | 14.34 | 0.81 |
| 198.4875 | 278.34 | 17.61 | 14.76 | 15.61 | 16.21 | 0.89 |
| 198.4876 | 112.66 | 17.65 | 14.35 | 15.22 | 15.34 | 1.29 |
| 198.5191 | 93.38  | 16.86 | 9.87  | 12.36 | 11.85 | 1.65 |
| 198.5228 | 103.95 | 15.29 | 10.77 | 15.11 | 12.36 | 0.68 |
| 198.5371 | 85.64  | 16.58 | 19.89 | 20.37 | 19.14 | 1.43 |
| 198.5759 | 77.73  | 16.93 | 16.76 | 16.57 | 16.58 | 0.19 |
| 198.5958 | 26.23  | 15.35 | 15.01 | 14.84 | 17.47 | 0.02 |
| 198.6286 | 24.29  | 16.55 | 19.28 | 17.19 | 19.28 | 1.08 |
| 198.6427 | 23.52  | 13.22 | 14.95 | 13.26 | 14.58 | 0.37 |
| 198.8543 | 47.62  | 17.12 | 17.88 | 17.85 | 17.66 | 0.83 |
| 198.8620 | 49.76  | 17.25 | 17.94 | 18.04 | 18.25 | 0.48 |
| 198.8760 | 110.07 | 13.53 | 15.69 | 11.48 | 16.08 | 0.22 |
| 198.9590 | 105.35 | 16.68 | 18.02 | 17.25 | 17.02 | 0.50 |
| 198.9742 | 57.39  | 17.41 | 13.37 | 13.38 | 13.31 | 1.03 |
| 198.9840 | 267.87 | 18.05 | 19.15 | 19.26 | 19.03 | 0.70 |
| 198.9966 | 89.98  | 15.77 | 16.82 | 16.87 | 16.58 | 0.66 |
| 199.0292 | 115.56 | 17.35 | 15.22 | 15.28 | 14.54 | 1.21 |
| 199.0377 | 81.34  | 17.43 | 16.76 | 17.00 | 16.97 | 0.62 |
| 199.0559 | 89.25  | 19.16 | 18.03 | 18.51 | 17.99 | 1.07 |
| 199.0640 | 24.56  | 13.78 | 16.31 | 14.07 | 17.09 | 0.71 |
| 199.0714 | 219.82 | 16.28 | 17.13 | 17.62 | 17.23 | 1.13 |

|          |        |       |       |       |       |      |
|----------|--------|-------|-------|-------|-------|------|
| 199.0794 | 287.49 | 19.26 | 17.35 | 17.17 | 17.48 | 1.04 |
| 199.0883 | 70.98  | 15.29 | 14.87 | 14.91 | 14.98 | 0.16 |
| 199.0948 | 28.77  | 20.18 | 18.90 | 19.11 | 18.90 | 0.96 |
| 199.0951 | 154.56 | 17.39 | 15.39 | 15.64 | 15.62 | 1.34 |
| 199.1010 | 29.46  | 22.09 | 21.14 | 21.26 | 20.94 | 0.75 |
| 199.1076 | 287.75 | 19.41 | 17.25 | 17.00 | 17.39 | 1.27 |
| 199.1077 | 23.1   | 18.41 | 14.55 | 14.97 | 15.62 | 1.94 |
| 199.1156 | 24.25  | 13.03 | 15.44 | 12.25 | 15.87 | 0.45 |
| 199.1170 | 229.85 | 16.09 | 9.81  | 13.39 | 9.88  | 1.29 |
| 199.1343 | 266.96 | 21.51 | 17.18 | 17.55 | 17.48 | 1.71 |
| 199.1437 | 24.18  | 15.85 | 17.10 | 15.25 | 15.43 | 0.24 |
| 199.1441 | 185.21 | 16.19 | 14.38 | 13.60 | 13.25 | 1.21 |
| 199.1480 | 23.88  | 18.29 | 15.28 | 15.96 | 16.98 | 1.48 |
| 199.1692 | 288.83 | 18.26 | 16.75 | 16.71 | 17.03 | 0.95 |
| 199.1692 | 19.96  | 17.34 | 13.85 | 14.19 | 15.38 | 1.86 |
| 199.1803 | 290.71 | 19.32 | 19.19 | 19.32 | 19.20 | 0.05 |
| 199.1805 | 178.57 | 19.86 | 18.74 | 18.13 | 19.01 | 0.69 |
| 199.4606 | 87.6   | 15.36 | 15.60 | 15.94 | 15.45 | 0.21 |
| 199.4789 | 105.68 | 16.36 | 12.89 | 14.60 | 14.29 | 0.93 |
| 199.5074 | 258.36 | 15.71 | 15.40 | 15.18 | 14.43 | 0.38 |
| 199.5171 | 107.41 | 16.95 | 13.91 | 15.14 | 14.38 | 1.03 |
| 199.5361 | 85.63  | 15.33 | 16.56 | 16.94 | 16.27 | 0.85 |
| 199.6036 | 25.08  | 15.87 | 16.64 | 14.43 | 18.15 | 0.07 |
| 199.6123 | 25.22  | 15.05 | 12.35 | 15.54 | 15.54 | 0.42 |
| 199.6178 | 23.88  | 14.11 | 14.84 | 15.30 | 14.33 | 0.32 |
| 199.6366 | 21     | 15.69 | 15.32 | 15.31 | 15.75 | 0.22 |
| 199.9611 | 262.34 | 17.52 | 16.33 | 16.15 | 16.76 | 0.72 |
| 199.9900 | 94.81  | 19.53 | 16.21 | 15.87 | 16.61 | 1.86 |
| 199.9965 | 300    | 16.24 | 13.83 | 12.30 | 15.09 | 1.15 |
| 200.0063 | 91.96  | 13.43 | 15.36 | 15.23 | 15.11 | 0.70 |
| 200.0318 | 68.35  | 14.27 | 13.75 | 15.58 | 13.85 | 0.08 |
| 200.0360 | 48.24  | 18.74 | 19.33 | 19.51 | 19.15 | 0.67 |
| 200.0438 | 82.17  | 22.38 | 20.04 | 20.69 | 20.48 | 1.55 |
| 200.0684 | 47.3   | 23.50 | 24.10 | 24.45 | 24.25 | 1.23 |
| 200.0758 | 96.11  | 17.32 | 18.51 | 18.58 | 18.36 | 1.01 |
| 200.1012 | 296.37 | 17.72 | 18.48 | 18.46 | 18.38 | 0.33 |
| 200.1013 | 177.75 | 19.62 | 18.54 | 18.91 | 18.80 | 0.76 |
| 200.1017 | 27.24  | 18.75 | 17.32 | 17.54 | 17.48 | 1.46 |
| 200.1110 | 199.05 | 16.25 | 12.64 | 12.67 | 13.04 | 1.01 |
| 200.1227 | 34.94  | 14.82 | 16.26 | 15.40 | 16.33 | 0.47 |
| 200.1280 | 291.74 | 17.92 | 17.47 | 17.24 | 16.88 | 0.36 |
| 200.1645 | 176.09 | 17.17 | 15.01 | 14.80 | 15.46 | 1.61 |
| 200.1839 | 151.95 | 17.07 | 15.53 | 15.74 | 15.63 | 1.27 |
| 200.2009 | 161.96 | 17.42 | 15.26 | 14.84 | 16.22 | 1.38 |
| 200.5459 | 83.05  | 19.49 | 16.99 | 17.36 | 17.32 | 1.61 |
| 200.5704 | 72.3   | 16.36 | 13.50 | 15.08 | 14.40 | 0.98 |
| 200.5779 | 89.86  | 16.00 | 15.95 | 16.34 | 15.24 | 0.01 |
| 200.6115 | 24.51  | 16.80 | 19.35 | 17.85 | 20.55 | 1.07 |
| 200.8523 | 44.84  | 15.23 | 13.73 | 13.81 | 14.27 | 1.20 |
| 200.8591 | 49.81  | 16.48 | 15.60 | 15.53 | 16.26 | 0.59 |
| 200.9735 | 272.79 | 21.66 | 21.92 | 21.77 | 21.41 | 0.10 |
| 200.9928 | 88.63  | 16.25 | 18.90 | 18.99 | 17.75 | 1.26 |
| 201.0377 | 81.75  | 13.63 | 15.46 | 16.14 | 14.26 | 0.51 |
| 201.0453 | 79.59  | 17.15 | 12.52 | 13.33 | 13.96 | 1.67 |
| 201.0537 | 74.65  | 19.14 | 19.08 | 19.56 | 19.23 | 0.18 |
| 201.0657 | 43.67  | 14.46 | 15.58 | 16.07 | 14.48 | 0.39 |

|          |        |       |       |       |       |      |
|----------|--------|-------|-------|-------|-------|------|
| 201.0718 | 45.45  | 19.66 | 20.03 | 20.54 | 20.16 | 0.95 |
| 201.0758 | 227.72 | 16.43 | 9.58  | 10.33 | 13.64 | 1.63 |
| 201.0869 | 188.66 | 18.04 | 14.85 | 14.94 | 15.47 | 1.70 |
| 201.0950 | 290.53 | 18.73 | 18.16 | 17.92 | 18.50 | 0.28 |
| 201.1035 | 24.77  | 13.75 | 14.32 | 11.89 | 16.30 | 0.01 |
| 201.1121 | 171.39 | 17.72 | 16.09 | 15.78 | 16.50 | 1.38 |
| 201.1127 | 21.71  | 16.82 | 16.63 | 15.02 | 18.27 | 0.32 |
| 201.1235 | 155.14 | 17.64 | 14.72 | 15.05 | 15.83 | 1.67 |
| 201.1273 | 24.2   | 16.91 | 13.59 | 13.74 | 15.64 | 1.41 |
| 201.1274 | 170.29 | 16.53 | 13.93 | 13.13 | 14.81 | 1.45 |
| 201.1305 | 23.3   | 15.83 | 17.64 | 19.72 | 18.11 | 1.34 |
| 201.1597 | 25.64  | 10.52 | 16.91 | 11.13 | 6.90  | 0.61 |
| 201.1598 | 158.04 | 14.07 | 17.54 | 14.92 | 9.46  | 0.34 |
| 201.1637 | 23.99  | 18.78 | 16.19 | 17.02 | 17.70 | 1.38 |
| 201.1638 | 141.57 | 17.55 | 15.47 | 15.58 | 16.36 | 1.41 |
| 201.4978 | 107.85 | 17.38 | 15.40 | 14.63 | 15.52 | 1.43 |
| 201.5097 | 254.24 | 15.32 | 16.21 | 16.27 | 14.58 | 0.32 |
| 201.5455 | 94.79  | 20.95 | 19.59 | 20.47 | 19.88 | 0.82 |
| 201.6193 | 24.36  | 14.84 | 16.50 | 14.28 | 17.03 | 0.37 |
| 201.6321 | 23.99  | 15.34 | 15.04 | 17.33 | 16.37 | 0.46 |
| 201.9241 | 276.63 | 17.38 | 16.28 | 16.87 | 16.12 | 0.42 |
| 201.9337 | 56.93  | 25.19 | 23.48 | 24.39 | 23.49 | 1.11 |
| 201.9642 | 97.31  | 17.16 | 20.20 | 17.76 | 19.72 | 0.89 |
| 201.9766 | 259.09 | 16.69 | 15.47 | 15.62 | 15.90 | 0.84 |
| 201.9771 | 108.04 | 18.07 | 16.03 | 16.95 | 16.11 | 1.15 |
| 201.9854 | 301.84 | 17.19 | 16.56 | 15.62 | 17.15 | 0.64 |
| 201.9906 | 43.71  | 18.63 | 15.56 | 15.52 | 16.55 | 1.72 |
| 202.0101 | 51.82  | 18.21 | 17.95 | 18.17 | 18.05 | 0.24 |
| 202.0104 | 233.56 | 16.41 | 14.86 | 15.24 | 15.38 | 1.20 |
| 202.0198 | 253.79 | 17.28 | 13.62 | 15.97 | 16.21 | 0.98 |
| 202.0402 | 66.61  | 16.99 | 14.42 | 14.26 | 14.48 | 0.75 |
| 202.0471 | 88.36  | 18.02 | 16.22 | 16.89 | 16.56 | 1.17 |
| 202.0665 | 45.52  | 19.60 | 19.98 | 20.48 | 20.11 | 0.96 |
| 202.0709 | 287.51 | 20.15 | 18.42 | 18.23 | 18.73 | 0.92 |
| 202.0780 | 156.68 | 16.96 | 14.99 | 15.69 | 15.52 | 1.39 |
| 202.0857 | 24.96  | 13.81 | 13.85 | 9.34  | 11.00 | 0.52 |
| 202.0863 | 197.46 | 15.97 | 11.84 | 14.07 | 13.53 | 0.96 |
| 202.0897 | 171.67 | 17.10 | 14.17 | 14.15 | 14.69 | 1.78 |
| 202.0979 | 195.45 | 16.77 | 13.73 | 13.02 | 14.61 | 1.63 |
| 202.1074 | 148.41 | 22.16 | 20.66 | 20.59 | 20.83 | 0.58 |
| 202.1113 | 24.61  | 8.43  | 15.61 | 10.76 | 15.39 | 1.09 |
| 202.1172 | 198.66 | 17.25 | 14.30 | 14.71 | 14.78 | 1.56 |
| 202.1382 | 23.27  | 13.90 | 13.19 | 15.99 | 14.33 | 0.22 |
| 202.1437 | 282.74 | 18.91 | 16.75 | 16.59 | 16.85 | 1.16 |
| 202.1670 | 22.87  | 16.02 | 10.59 | 12.72 | 13.66 | 1.36 |
| 202.1801 | 21.58  | 16.03 | 12.18 | 12.73 | 13.83 | 1.78 |
| 202.1802 | 168.35 | 16.24 | 14.16 | 14.43 | 14.92 | 1.22 |
| 202.2165 | 23.2   | 14.41 | 15.00 | 11.99 | 12.19 | 0.30 |
| 202.3717 | 234.37 | 18.42 | 19.98 | 21.47 | 19.64 | 0.93 |
| 202.5056 | 99.26  | 16.17 | 14.81 | 14.09 | 14.66 | 0.81 |
| 202.5120 | 247.32 | 16.80 | 17.65 | 17.59 | 17.06 | 0.36 |
| 202.5176 | 255.82 | 17.46 | 19.00 | 17.75 | 17.54 | 0.35 |
| 202.5216 | 141.57 | 16.01 | 14.88 | 14.76 | 14.99 | 1.02 |
| 202.5308 | 32.58  | 15.25 | 13.95 | 16.85 | 16.62 | 0.08 |
| 202.5526 | 79.36  | 18.05 | 17.21 | 17.60 | 17.19 | 0.43 |
| 202.5713 | 81.17  | 16.49 | 17.43 | 16.88 | 17.37 | 0.55 |



|          |        |       |       |       |       |      |
|----------|--------|-------|-------|-------|-------|------|
| 202.6289 | 148.44 | 10.70 | 13.97 | 12.07 | 13.42 | 0.69 |
| 202.7063 | 233.35 | 16.25 | 17.04 | 18.62 | 16.59 | 0.62 |
| 202.8848 | 131.37 | 14.94 | 14.61 | 16.72 | 13.88 | 0.18 |
| 202.8910 | 43.41  | 15.66 | 18.28 | 19.40 | 17.62 | 1.63 |
| 202.9178 | 44.83  | 16.23 | 14.82 | 14.50 | 14.31 | 1.10 |
| 202.9345 | 35.25  | 19.96 | 18.00 | 19.00 | 17.88 | 1.17 |
| 202.9768 | 25.16  | 14.18 | 12.84 | 12.40 | 13.32 | 0.81 |
| 202.9899 | 103.79 | 20.06 | 18.87 | 19.55 | 19.09 | 0.89 |
| 203.0067 | 94.57  | 22.09 | 24.58 | 24.94 | 23.94 | 1.16 |
| 203.0151 | 48.04  | 16.14 | 13.58 | 14.49 | 14.24 | 0.84 |
| 203.0193 | 142.6  | 14.81 | 15.35 | 14.62 | 14.67 | 0.06 |
| 203.0209 | 27.72  | 12.82 | 17.97 | 10.17 | 10.93 | 0.32 |
| 203.0375 | 241.88 | 14.96 | 15.64 | 16.62 | 15.34 | 0.45 |
| 203.0513 | 78.5   | 23.09 | 23.04 | 23.07 | 22.98 | 0.05 |
| 203.0593 | 27.76  | 15.76 | 19.03 | 14.04 | 15.28 | 0.37 |
| 203.0663 | 90.2   | 16.97 | 15.33 | 16.06 | 16.12 | 1.05 |
| 203.0695 | 82.5   | 16.06 | 16.52 | 16.50 | 16.37 | 0.37 |
| 203.0856 | 183.54 | 16.81 | 14.96 | 15.05 | 15.17 | 1.28 |
| 203.0928 | 292.61 | 18.25 | 18.09 | 17.96 | 18.20 | 0.10 |
| 203.0932 | 26.5   | 19.05 | 17.25 | 17.26 | 16.63 | 1.40 |
| 203.1024 | 162.78 | 17.47 | 15.33 | 16.29 | 16.00 | 1.14 |
| 203.1067 | 173.67 | 16.92 | 14.94 | 15.19 | 15.51 | 1.50 |
| 203.1106 | 283.9  | 18.77 | 16.53 | 16.29 | 16.90 | 1.42 |
| 203.1391 | 45.16  | 18.68 | 19.06 | 18.97 | 18.96 | 0.39 |
| 203.1430 | 20.06  | 17.03 | 13.71 | 14.25 | 15.28 | 1.80 |
| 203.1431 | 164.42 | 17.83 | 15.70 | 15.94 | 16.17 | 1.39 |
| 203.1503 | 64.38  | 21.34 | 21.97 | 21.81 | 21.41 | 0.59 |
| 203.1793 | 23.96  | 18.21 | 16.46 | 16.70 | 17.37 | 1.34 |
| 203.1793 | 282.01 | 17.85 | 16.08 | 16.02 | 16.33 | 1.35 |
| 203.1794 | 162.7  | 18.27 | 15.77 | 15.78 | 16.44 | 1.52 |
| 203.2229 | 284.72 | 19.27 | 20.73 | 18.97 | 20.23 | 0.38 |
| 203.2230 | 19.49  | 18.44 | 16.74 | 15.01 | 18.41 | 0.77 |
| 203.5113 | 184.73 | 11.39 | 12.15 | 13.04 | 12.05 | 0.32 |
| 203.5505 | 91.84  | 17.88 | 18.35 | 18.00 | 18.42 | 0.29 |
| 203.5560 | 79.59  | 18.02 | 17.67 | 17.75 | 17.69 | 0.21 |
| 203.5634 | 85.03  | 17.56 | 19.50 | 19.63 | 19.09 | 1.28 |
| 203.6061 | 24.31  | 10.44 | 13.47 | 11.38 | 16.27 | 0.64 |
| 203.9210 | 281.43 | 16.24 | 15.39 | 15.31 | 15.48 | 0.46 |
| 203.9211 | 152.73 | 15.92 | 14.19 | 15.22 | 14.88 | 0.43 |
| 203.9306 | 60.79  | 22.35 | 20.66 | 21.69 | 20.28 | 0.91 |
| 203.9377 | 51.1   | 17.63 | 14.77 | 15.40 | 14.87 | 1.04 |
| 203.9734 | 93.8   | 18.97 | 16.34 | 16.50 | 16.54 | 1.24 |
| 203.9906 | 87.86  | 13.10 | 16.17 | 16.74 | 15.34 | 1.01 |
| 204.0042 | 88.67  | 13.32 | 13.98 | 16.12 | 14.51 | 0.53 |
| 204.0089 | 84.02  | 18.77 | 21.64 | 22.12 | 21.25 | 1.48 |
| 204.0179 | 88.12  | 17.45 | 15.24 | 17.09 | 15.54 | 0.99 |
| 204.0643 | 74.55  | 15.71 | 11.87 | 13.73 | 13.72 | 0.81 |
| 204.0655 | 223.29 | 15.47 | 8.80  | 10.06 | 11.38 | 1.44 |
| 204.0865 | 266.51 | 21.94 | 20.52 | 21.35 | 20.99 | 0.62 |
| 204.0963 | 189.45 | 16.56 | 11.70 | 12.29 | 12.67 | 1.92 |
| 204.0980 | 64.14  | 16.86 | 16.10 | 16.70 | 16.67 | 0.32 |
| 204.1050 | 292.75 | 19.33 | 17.28 | 17.76 | 17.97 | 0.77 |
| 204.1052 | 171    | 20.21 | 17.99 | 18.54 | 18.58 | 1.33 |
| 204.1141 | 203.01 | 15.17 | 7.46  | 7.50  | 8.91  | 1.71 |
| 204.1185 | 32.27  | 18.09 | 18.97 | 18.64 | 17.62 | 0.31 |
| 204.1230 | 53.88  | 29.03 | 30.45 | 29.42 | 29.50 | 1.16 |

|          |        |       |       |       |       |      |
|----------|--------|-------|-------|-------|-------|------|
| 204.1324 | 49.95  | 17.00 | 12.29 | 15.41 | 13.56 | 0.83 |
| 204.1383 | 168.3  | 16.94 | 12.83 | 14.45 | 14.94 | 1.49 |
| 204.1593 | 200.29 | 16.61 | 9.29  | 9.52  | 10.86 | 1.66 |
| 204.5243 | 91.16  | 14.57 | 15.34 | 15.21 | 14.86 | 0.21 |
| 204.5411 | 26.87  | 16.67 | 18.72 | 16.00 | 15.90 | 0.48 |
| 204.5555 | 94.07  | 19.92 | 19.64 | 20.04 | 19.33 | 0.11 |
| 204.5621 | 85.24  | 15.95 | 16.15 | 16.25 | 16.11 | 0.22 |
| 204.6139 | 23.99  | 13.70 | 14.85 | 12.29 | 16.23 | 0.16 |
| 204.6245 | 24.48  | 14.00 | 16.67 | 13.25 | 16.47 | 0.49 |
| 204.8888 | 271.44 | 19.26 | 12.14 | 12.48 | 14.21 | 1.46 |
| 204.8889 | 37.95  | 16.59 | 15.10 | 17.03 | 16.12 | 0.45 |
| 204.9185 | 255.3  | 18.10 | 15.45 | 15.11 | 16.21 | 1.02 |
| 204.9336 | 23.22  | 16.80 | 13.85 | 13.63 | 15.09 | 1.50 |
| 204.9666 | 111.59 | 16.40 | 15.10 | 15.42 | 15.29 | 0.83 |
| 204.9730 | 72.94  | 16.68 | 10.64 | 12.56 | 15.27 | 1.31 |
| 204.9900 | 63.86  | 17.00 | 14.29 | 11.78 | 12.70 | 0.91 |
| 204.9952 | 82.83  | 21.34 | 22.04 | 22.58 | 22.05 | 0.56 |
| 205.0039 | 87.07  | 18.94 | 21.62 | 22.06 | 21.01 | 1.29 |
| 205.0108 | 88.08  | 16.50 | 17.44 | 18.05 | 17.15 | 0.81 |
| 205.0225 | 94.41  | 17.57 | 20.03 | 20.89 | 19.11 | 1.31 |
| 205.0363 | 40.1   | 16.14 | 15.06 | 16.89 | 14.28 | 0.26 |
| 205.0451 | 95.38  | 18.10 | 13.86 | 13.36 | 15.35 | 1.35 |
| 205.0515 | 51.78  | 16.70 | 15.20 | 15.51 | 16.99 | 0.57 |
| 205.0599 | 66.83  | 16.97 | 14.20 | 16.03 | 15.32 | 0.77 |
| 205.0642 | 45.04  | 15.98 | 17.18 | 16.80 | 17.95 | 0.59 |
| 205.0682 | 54.39  | 16.36 | 14.46 | 14.82 | 15.40 | 0.76 |
| 205.0730 | 123.63 | 16.03 | 16.76 | 16.89 | 16.23 | 0.73 |
| 205.0817 | 168.41 | 17.74 | 19.32 | 16.98 | 19.21 | 0.30 |
| 205.0858 | 291.44 | 18.26 | 17.43 | 17.31 | 17.47 | 0.47 |
| 205.0900 | 272.25 | 18.90 | 17.02 | 16.86 | 17.39 | 1.45 |
| 205.0972 | 43.9   | 24.31 | 23.55 | 23.83 | 23.85 | 1.08 |
| 205.1085 | 182.32 | 22.04 | 20.55 | 20.38 | 20.17 | 0.85 |
| 205.1192 | 269.64 | 16.59 | 17.70 | 18.63 | 17.02 | 0.66 |
| 205.1262 | 49     | 25.52 | 27.02 | 26.28 | 26.12 | 1.34 |
| 205.1547 | 66.91  | 15.58 | 16.60 | 15.78 | 16.57 | 0.53 |
| 205.1586 | 21.71  | 16.86 | 13.02 | 14.19 | 14.46 | 1.81 |
| 205.1586 | 269.01 | 17.47 | 15.88 | 15.59 | 16.15 | 1.38 |
| 205.1949 | 23.61  | 16.92 | 13.67 | 14.04 | 15.06 | 1.81 |
| 205.1950 | 288.91 | 17.10 | 15.62 | 15.87 | 15.73 | 0.92 |
| 205.1950 | 172.33 | 17.40 | 15.09 | 14.54 | 15.76 | 1.53 |
| 205.5069 | 90.49  | 18.22 | 16.03 | 16.48 | 16.53 | 0.98 |
| 205.5133 | 116.65 | 16.27 | 14.54 | 13.71 | 14.25 | 1.14 |
| 205.5379 | 206.89 | 17.25 | 18.45 | 18.89 | 19.32 | 0.81 |
| 205.5477 | 191.82 | 11.36 | 13.52 | 13.49 | 14.17 | 0.73 |
| 205.5626 | 77.41  | 19.76 | 19.55 | 20.41 | 19.77 | 0.09 |
| 205.5999 | 26.55  | 15.19 | 15.97 | 15.42 | 18.00 | 0.41 |
| 205.6069 | 23.72  | 16.85 | 10.41 | 11.04 | 12.03 | 1.93 |
| 205.6323 | 22.55  | 16.94 | 19.33 | 17.54 | 19.26 | 1.17 |
| 205.9199 | 131.82 | 14.76 | 14.00 | 14.29 | 13.45 | 0.26 |
| 205.9275 | 52.65  | 17.34 | 14.44 | 15.28 | 14.61 | 1.18 |
| 205.9364 | 269.06 | 17.23 | 12.10 | 12.13 | 13.79 | 1.51 |
| 205.9616 | 37.9   | 17.06 | 18.07 | 18.25 | 19.21 | 0.90 |
| 205.9984 | 82.43  | 18.29 | 17.98 | 18.09 | 17.67 | 0.31 |
| 206.0076 | 90.24  | 18.12 | 16.19 | 16.57 | 16.88 | 1.46 |
| 206.0213 | 240.01 | 12.38 | 14.05 | 12.58 | 15.36 | 0.40 |
| 206.0247 | 86.15  | 17.48 | 16.81 | 17.49 | 17.12 | 0.34 |

|          |        |       |       |       |       |      |
|----------|--------|-------|-------|-------|-------|------|
| 206.0384 | 255.66 | 14.95 | 13.84 | 16.64 | 14.51 | 0.01 |
| 206.0475 | 55.36  | 20.26 | 19.51 | 20.32 | 19.98 | 0.43 |
| 206.0553 | 88.59  | 21.08 | 23.26 | 22.37 | 22.47 | 1.45 |
| 206.0645 | 77.38  | 22.24 | 22.59 | 23.21 | 22.56 | 0.31 |
| 206.0812 | 181.44 | 16.54 | 12.91 | 12.97 | 12.94 | 1.27 |
| 206.0843 | 278.84 | 17.71 | 16.46 | 16.03 | 16.38 | 1.16 |
| 206.0851 | 87.99  | 18.69 | 18.54 | 18.92 | 19.17 | 0.07 |
| 206.0943 | 38.4   | 17.15 | 14.28 | 15.17 | 15.76 | 1.32 |
| 206.1022 | 279.72 | 19.72 | 17.30 | 16.23 | 17.88 | 0.82 |
| 206.1063 | 26.38  | 15.27 | 15.56 | 13.94 | 17.06 | 0.04 |
| 206.1119 | 164.69 | 18.05 | 15.26 | 15.46 | 15.54 | 1.61 |
| 206.1120 | 27.02  | 17.33 | 18.38 | 18.64 | 16.53 | 0.46 |
| 206.1174 | 186.2  | 16.65 | 13.98 | 14.15 | 14.54 | 1.56 |
| 206.1279 | 48.1   | 21.96 | 23.74 | 22.97 | 22.54 | 1.38 |
| 206.1340 | 26.74  | 15.06 | 16.39 | 12.50 | 16.51 | 0.04 |
| 206.1387 | 177.26 | 15.13 | 14.44 | 14.17 | 13.60 | 0.43 |
| 206.1482 | 275.05 | 17.00 | 15.27 | 15.43 | 15.04 | 1.20 |
| 206.1520 | 56.06  | 18.37 | 20.32 | 19.91 | 19.67 | 0.94 |
| 206.1530 | 224.47 | 17.03 | 14.66 | 15.43 | 15.16 | 1.17 |
| 206.4328 | 117.23 | 15.62 | 14.04 | 15.91 | 14.29 | 0.36 |
| 206.5269 | 269.82 | 12.24 | 17.07 | 17.08 | 15.63 | 1.30 |
| 206.5372 | 156.7  | 14.11 | 15.58 | 14.56 | 14.60 | 0.41 |
| 206.5413 | 195.23 | 14.90 | 15.31 | 15.57 | 16.02 | 0.41 |
| 206.5668 | 60.71  | 15.78 | 15.54 | 15.22 | 15.41 | 0.17 |
| 206.5701 | 75.77  | 15.45 | 14.38 | 13.91 | 15.70 | 0.39 |
| 206.6488 | 23.42  | 14.85 | 12.35 | 15.44 | 14.39 | 0.44 |
| 206.6536 | 58.09  | 14.91 | 17.73 | 17.24 | 17.21 | 0.86 |
| 206.8858 | 44.42  | 20.91 | 22.65 | 22.43 | 22.50 | 1.44 |
| 206.8938 | 48.65  | 18.31 | 20.38 | 20.40 | 20.39 | 1.08 |
| 206.9456 | 43.45  | 16.42 | 18.31 | 18.36 | 17.85 | 1.64 |
| 206.9912 | 97.55  | 17.78 | 16.93 | 16.78 | 16.90 | 0.72 |
| 207.0052 | 266.01 | 19.23 | 18.85 | 20.62 | 20.52 | 0.30 |
| 207.0143 | 77.57  | 19.29 | 19.95 | 19.54 | 19.84 | 0.35 |
| 207.0184 | 257.12 | 17.47 | 16.67 | 14.90 | 15.95 | 0.83 |
| 207.0283 | 82.99  | 17.77 | 18.64 | 18.25 | 18.63 | 0.77 |
| 207.0365 | 160.71 | 14.37 | 15.20 | 14.49 | 14.69 | 0.19 |
| 207.0514 | 46.91  | 19.90 | 19.94 | 19.92 | 19.37 | 0.05 |
| 207.0604 | 79.65  | 17.35 | 19.34 | 18.67 | 19.25 | 1.22 |
| 207.0672 | 62.86  | 17.45 | 16.90 | 17.54 | 18.11 | 0.08 |
| 207.0764 | 205.61 | 16.26 | 13.62 | 13.04 | 13.70 | 0.95 |
| 207.0864 | 73.42  | 12.93 | 14.37 | 15.12 | 15.54 | 0.50 |
| 207.0967 | 179.59 | 17.98 | 15.16 | 15.48 | 15.84 | 1.62 |
| 207.1021 | 194.11 | 16.97 | 14.54 | 14.67 | 15.16 | 1.51 |
| 207.1024 | 283.12 | 16.80 | 15.08 | 14.93 | 15.32 | 1.08 |
| 207.1032 | 30.99  | 15.23 | 16.79 | 17.57 | 14.46 | 0.55 |
| 207.1240 | 288.35 | 20.43 | 20.17 | 19.80 | 20.63 | 0.17 |
| 207.1306 | 29.5   | 18.24 | 19.96 | 18.62 | 19.19 | 1.07 |
| 207.1378 | 22.92  | 17.60 | 14.67 | 15.58 | 16.21 | 1.65 |
| 207.1378 | 293.48 | 18.46 | 17.12 | 17.32 | 17.13 | 0.96 |
| 207.1741 | 23.69  | 17.20 | 14.56 | 15.27 | 15.35 | 1.67 |
| 207.1743 | 286.64 | 17.84 | 16.63 | 16.73 | 16.71 | 1.07 |
| 207.2067 | 30.54  | 18.42 | 19.26 | 19.23 | 19.57 | 1.02 |
| 207.2108 | 180.59 | 16.94 | 14.16 | 14.26 | 14.64 | 1.62 |
| 207.4407 | 102.07 | 16.02 | 14.44 | 15.67 | 14.81 | 0.54 |
| 207.5270 | 285.28 | 16.53 | 14.84 | 15.79 | 14.08 | 0.82 |
| 207.6011 | 26.23  | 16.71 | 18.38 | 17.80 | 20.61 | 0.78 |

|          |        |       |       |       |       |      |
|----------|--------|-------|-------|-------|-------|------|
| 207.6066 | 25.33  | 16.97 | 20.88 | 18.75 | 19.88 | 1.41 |
| 207.8892 | 44.47  | 16.13 | 16.25 | 16.04 | 16.46 | 0.07 |
| 207.9798 | 36.97  | 17.86 | 11.78 | 12.53 | 13.34 | 1.90 |
| 207.9887 | 274.16 | 14.80 | 16.74 | 17.09 | 16.68 | 1.00 |
| 207.9983 | 69.17  | 19.69 | 19.98 | 20.82 | 19.81 | 0.51 |
| 208.0135 | 46.79  | 20.83 | 22.08 | 22.00 | 21.80 | 1.64 |
| 208.0237 | 85.31  | 15.66 | 15.45 | 15.18 | 15.71 | 0.17 |
| 208.0693 | 57.7   | 18.78 | 17.60 | 16.96 | 17.10 | 1.17 |
| 208.0882 | 52.6   | 15.86 | 15.45 | 15.46 | 15.43 | 0.21 |
| 208.0969 | 20.52  | 16.89 | 12.37 | 14.71 | 14.29 | 1.44 |
| 208.0970 | 177.52 | 17.56 | 14.75 | 14.88 | 15.72 | 1.57 |
| 208.0999 | 285.29 | 19.66 | 18.00 | 18.21 | 17.90 | 0.95 |
| 208.1083 | 25.16  | 15.49 | 18.31 | 16.87 | 17.14 | 0.99 |
| 208.1275 | 178.75 | 17.36 | 14.59 | 14.28 | 15.17 | 1.72 |
| 208.1333 | 175.43 | 16.97 | 15.07 | 14.90 | 15.29 | 1.32 |
| 208.1389 | 181.56 | 16.74 | 14.23 | 14.93 | 14.46 | 1.49 |
| 208.1398 | 24.55  | 13.23 | 16.01 | 12.46 | 15.54 | 0.37 |
| 208.1695 | 199.99 | 16.35 | 12.91 | 13.41 | 13.50 | 1.22 |
| 208.4573 | 101.23 | 15.73 | 14.88 | 15.50 | 14.70 | 0.46 |
| 208.5053 | 97.51  | 17.35 | 16.52 | 17.43 | 16.03 | 0.39 |
| 208.5127 | 258.23 | 14.28 | 14.15 | 13.53 | 12.11 | 0.27 |
| 208.6089 | 25.73  | 15.20 | 17.49 | 15.60 | 18.31 | 0.73 |
| 208.6175 | 25.45  | 15.64 | 13.54 | 16.53 | 16.08 | 0.24 |
| 208.6231 | 24.14  | 15.16 | 16.41 | 17.54 | 15.73 | 0.89 |
| 208.8838 | 42.4   | 19.09 | 20.31 | 20.10 | 20.20 | 1.20 |
| 208.8908 | 48.63  | 17.97 | 19.72 | 19.76 | 19.76 | 1.02 |
| 208.9354 | 48.3   | 14.87 | 13.54 | 14.16 | 13.53 | 0.59 |
| 208.9437 | 43.25  | 12.62 | 14.00 | 14.73 | 13.22 | 0.73 |
| 208.9522 | 257.05 | 17.61 | 16.35 | 16.78 | 17.20 | 0.84 |
| 208.9614 | 38.01  | 15.45 | 17.27 | 16.92 | 16.69 | 1.36 |
| 208.9750 | 42.3   | 18.40 | 12.07 | 12.84 | 13.99 | 1.91 |
| 208.9873 | 88.22  | 17.30 | 16.86 | 17.34 | 17.20 | 0.17 |
| 209.0019 | 64.51  | 15.97 | 12.80 | 15.01 | 13.78 | 1.05 |
| 209.0048 | 195.64 | 11.37 | 14.44 | 15.73 | 15.72 | 1.09 |
| 209.0124 | 66.62  | 15.67 | 11.88 | 13.27 | 14.02 | 0.81 |
| 209.0165 | 59.51  | 17.72 | 17.61 | 17.76 | 17.67 | 0.05 |
| 209.0249 | 34.56  | 14.79 | 15.52 | 16.45 | 15.83 | 0.59 |
| 209.0360 | 90.55  | 17.46 | 16.51 | 17.19 | 17.19 | 0.38 |
| 209.0409 | 27.34  | 16.21 | 19.07 | 17.67 | 19.33 | 1.36 |
| 209.0481 | 61.26  | 15.38 | 11.74 | 13.37 | 15.65 | 0.79 |
| 209.0590 | 174.45 | 15.48 | 15.28 | 15.70 | 15.85 | 0.04 |
| 209.0727 | 61.13  | 22.47 | 21.96 | 21.60 | 21.16 | 0.59 |
| 209.0791 | 61.64  | 17.29 | 13.78 | 15.53 | 15.25 | 1.31 |
| 209.0920 | 44.08  | 19.69 | 18.83 | 19.09 | 18.77 | 0.57 |
| 209.1029 | 60.09  | 16.49 | 11.94 | 13.34 | 13.72 | 1.11 |
| 209.1172 | 160.47 | 18.14 | 12.58 | 13.10 | 13.47 | 2.00 |
| 209.1187 | 24.47  | 18.52 | 22.94 | 21.09 | 22.29 | 1.50 |
| 209.1282 | 217.87 | 16.50 | 12.68 | 14.22 | 14.09 | 1.43 |
| 209.1534 | 22.14  | 17.60 | 14.78 | 16.16 | 16.15 | 1.47 |
| 209.1535 | 277.3  | 18.43 | 17.08 | 17.36 | 16.72 | 0.85 |
| 209.1536 | 143.83 | 18.54 | 17.41 | 18.38 | 17.79 | 0.65 |
| 209.1898 | 23.57  | 17.11 | 14.51 | 14.89 | 16.02 | 1.46 |
| 209.1900 | 168.9  | 17.78 | 15.46 | 15.09 | 16.24 | 1.45 |
| 209.5219 | 86.21  | 15.72 | 16.69 | 17.58 | 16.99 | 0.80 |
| 209.5516 | 86.14  | 18.11 | 20.30 | 20.22 | 19.87 | 1.24 |
| 209.5835 | 90.28  | 17.74 | 18.27 | 18.96 | 17.71 | 0.65 |

|          |        |       |       |       |       |      |
|----------|--------|-------|-------|-------|-------|------|
| 209.6166 | 24.66  | 15.21 | 15.06 | 15.22 | 16.89 | 0.08 |
| 209.6208 | 24.37  | 16.97 | 20.81 | 18.98 | 20.41 | 1.49 |
| 209.6436 | 23.45  | 14.42 | 11.62 | 15.63 | 14.00 | 0.37 |
| 209.9566 | 67.92  | 16.06 | 16.22 | 15.69 | 15.93 | 0.04 |
| 209.9834 | 84     | 15.79 | 17.28 | 17.65 | 16.64 | 0.85 |
| 209.9961 | 48.31  | 19.17 | 19.25 | 19.89 | 19.51 | 0.62 |
| 210.0014 | 93.87  | 16.74 | 17.56 | 18.07 | 16.66 | 0.55 |
| 210.0073 | 112.85 | 16.96 | 15.09 | 16.08 | 16.06 | 0.97 |
| 210.0117 | 43.78  | 18.00 | 18.95 | 18.90 | 18.73 | 1.33 |
| 210.0188 | 70.8   | 17.05 | 17.24 | 17.09 | 17.44 | 0.14 |
| 210.0445 | 83.97  | 16.15 | 16.24 | 17.51 | 17.02 | 0.55 |
| 210.0510 | 64.26  | 19.09 | 18.38 | 19.05 | 19.00 | 0.52 |
| 210.0759 | 293.81 | 17.13 | 16.60 | 16.54 | 16.26 | 0.30 |
| 210.0867 | 81.03  | 16.35 | 15.43 | 15.36 | 15.43 | 0.63 |
| 210.0972 | 280.25 | 15.82 | 14.15 | 15.27 | 15.11 | 0.44 |
| 210.1066 | 293.28 | 18.79 | 17.33 | 17.26 | 17.39 | 0.90 |
| 210.1125 | 180.59 | 17.20 | 14.92 | 14.51 | 15.15 | 1.47 |
| 210.1158 | 154.71 | 18.46 | 15.29 | 15.43 | 15.86 | 1.73 |
| 210.1225 | 26.78  | 16.14 | 17.18 | 15.64 | 16.90 | 0.28 |
| 210.1234 | 201.66 | 16.03 | 12.36 | 12.97 | 13.23 | 1.35 |
| 210.1269 | 24.13  | 16.51 | 19.17 | 17.26 | 18.96 | 1.09 |
| 210.1488 | 187.85 | 16.76 | 14.61 | 14.75 | 15.12 | 1.61 |
| 210.1570 | 178.32 | 15.31 | 9.54  | 11.86 | 11.16 | 1.20 |
| 210.4920 | 301.68 | 14.72 | 15.60 | 15.57 | 13.91 | 0.35 |
| 210.5149 | 272.67 | 17.22 | 18.92 | 19.51 | 17.44 | 0.88 |
| 210.5206 | 87.78  | 15.31 | 15.05 | 15.97 | 15.18 | 0.07 |
| 210.5285 | 92.74  | 17.17 | 14.59 | 13.96 | 14.57 | 0.98 |
| 210.5504 | 85.98  | 16.28 | 16.79 | 16.65 | 16.81 | 0.43 |
| 210.5536 | 85.91  | 14.70 | 15.16 | 14.57 | 14.46 | 0.07 |
| 210.5600 | 76.89  | 16.56 | 15.38 | 15.65 | 15.49 | 0.50 |
| 210.5824 | 95.08  | 15.62 | 15.42 | 15.80 | 15.40 | 0.05 |
| 210.5899 | 140.6  | 12.51 | 13.45 | 14.03 | 13.68 | 0.45 |
| 210.6285 | 24.14  | 14.29 | 16.76 | 14.87 | 16.65 | 0.73 |
| 210.6514 | 23.16  | 14.93 | 15.34 | 17.08 | 16.67 | 0.76 |
| 210.8821 | 44.44  | 15.68 | 15.33 | 14.93 | 15.62 | 0.37 |
| 210.8879 | 48.57  | 16.10 | 16.61 | 16.43 | 16.81 | 0.38 |
| 210.8992 | 266.64 | 18.21 | 11.72 | 11.74 | 12.42 | 1.40 |
| 210.8993 | 110.26 | 17.79 | 11.96 | 14.10 | 12.40 | 1.35 |
| 210.9058 | 25.99  | 15.37 | 9.79  | 12.39 | 10.92 | 1.38 |
| 210.9326 | 300.71 | 17.61 | 14.89 | 14.47 | 16.65 | 1.07 |
| 210.9406 | 38.12  | 18.84 | 22.11 | 22.01 | 21.81 | 1.94 |
| 210.9505 | 297.72 | 17.58 | 13.03 | 13.34 | 14.75 | 1.66 |
| 210.9682 | 107.82 | 21.00 | 17.77 | 18.35 | 17.78 | 1.63 |
| 210.9853 | 87.2   | 16.42 | 17.69 | 17.86 | 17.45 | 0.80 |
| 210.9995 | 81.28  | 12.50 | 14.77 | 15.22 | 13.68 | 0.57 |
| 211.0169 | 253.64 | 12.71 | 13.62 | 14.73 | 12.27 | 0.42 |
| 211.0324 | 100.61 | 17.23 | 13.16 | 12.91 | 15.08 | 1.41 |
| 211.0393 | 69.75  | 20.14 | 20.81 | 21.78 | 20.67 | 0.66 |
| 211.0530 | 80.77  | 18.07 | 19.65 | 20.64 | 19.22 | 1.28 |
| 211.0564 | 80.68  | 14.57 | 16.16 | 15.37 | 15.93 | 0.58 |
| 211.0640 | 25.09  | 11.76 | 15.93 | 12.34 | 16.65 | 0.79 |
| 211.0714 | 214.81 | 16.29 | 16.57 | 17.31 | 17.04 | 0.65 |
| 211.0965 | 193.5  | 16.75 | 14.35 | 14.61 | 15.04 | 1.64 |
| 211.1076 | 287.06 | 19.82 | 17.78 | 17.80 | 18.05 | 1.11 |
| 211.1157 | 34.21  | 12.73 | 16.68 | 14.29 | 15.96 | 0.88 |
| 211.1328 | 289.84 | 17.87 | 16.73 | 16.69 | 16.61 | 0.94 |

|          |        |       |       |       |       |      |
|----------|--------|-------|-------|-------|-------|------|
| 211.1332 | 22.37  | 17.54 | 15.38 | 15.60 | 16.42 | 1.42 |
| 211.1442 | 195.07 | 17.52 | 14.67 | 14.71 | 15.32 | 1.64 |
| 211.1529 | 23.09  | 14.12 | 11.90 | 14.27 | 14.39 | 0.40 |
| 211.1691 | 290.39 | 17.31 | 16.17 | 16.08 | 16.12 | 0.98 |
| 211.2056 | 164.54 | 17.48 | 15.04 | 14.82 | 15.42 | 1.63 |
| 211.5171 | 268.94 | 14.70 | 17.18 | 17.36 | 16.40 | 1.03 |
| 211.5227 | 272.77 | 14.86 | 17.34 | 16.73 | 15.59 | 0.79 |
| 211.5229 | 140.17 | 15.05 | 16.42 | 15.23 | 14.39 | 0.27 |
| 211.5412 | 80.68  | 16.72 | 16.55 | 17.00 | 16.16 | 0.03 |
| 211.5525 | 97.93  | 19.83 | 17.51 | 18.21 | 17.85 | 1.47 |
| 211.6595 | 33.61  | 13.16 | 14.90 | 15.48 | 15.29 | 0.82 |
| 211.9404 | 291.27 | 18.31 | 16.54 | 16.01 | 17.77 | 1.13 |
| 211.9441 | 37.29  | 15.57 | 16.46 | 16.24 | 16.43 | 1.16 |
| 211.9633 | 109    | 17.86 | 17.00 | 17.48 | 16.93 | 0.73 |
| 211.9763 | 95.95  | 14.68 | 14.07 | 15.39 | 14.25 | 0.04 |
| 211.9943 | 46.63  | 16.45 | 14.97 | 14.95 | 15.73 | 0.75 |
| 212.0068 | 44.24  | 15.95 | 15.14 | 15.61 | 15.55 | 0.27 |
| 212.0148 | 286.69 | 13.90 | 16.77 | 17.16 | 16.30 | 1.28 |
| 212.0149 | 183.66 | 11.25 | 15.53 | 14.63 | 14.35 | 1.29 |
| 212.0246 | 86.44  | 13.85 | 15.22 | 14.34 | 14.15 | 0.29 |
| 212.0319 | 263.24 | 16.80 | 15.38 | 15.99 | 15.33 | 0.66 |
| 212.0334 | 90.37  | 16.81 | 9.62  | 10.67 | 11.86 | 1.77 |
| 212.0374 | 78.84  | 14.65 | 15.87 | 15.58 | 15.31 | 0.36 |
| 212.0422 | 102.12 | 17.09 | 15.97 | 17.19 | 16.80 | 0.34 |
| 212.0526 | 89.12  | 17.72 | 16.37 | 17.01 | 16.41 | 1.02 |
| 212.0739 | 34.99  | 15.20 | 17.00 | 12.50 | 12.49 | 0.23 |
| 212.0853 | 59.36  | 15.29 | 14.15 | 14.96 | 14.51 | 0.41 |
| 212.0916 | 284.5  | 20.94 | 20.16 | 19.47 | 20.41 | 0.52 |
| 212.0917 | 141.99 | 19.86 | 19.38 | 19.45 | 19.44 | 0.20 |
| 212.1029 | 81.57  | 19.00 | 20.30 | 20.12 | 20.08 | 0.93 |
| 212.1110 | 209.27 | 17.03 | 13.15 | 13.92 | 14.16 | 1.56 |
| 212.1190 | 25.11  | 16.33 | 15.90 | 15.60 | 18.05 | 0.11 |
| 212.1281 | 152.95 | 17.40 | 15.45 | 15.66 | 16.01 | 1.49 |
| 212.1282 | 19.72  | 16.45 | 13.66 | 15.28 | 13.59 | 1.08 |
| 212.1642 | 202.69 | 16.83 | 14.64 | 15.04 | 14.98 | 1.61 |
| 212.3811 | 235.2  | 16.51 | 17.14 | 18.25 | 16.87 | 0.81 |
| 212.4851 | 272.15 | 17.15 | 12.73 | 14.46 | 14.16 | 1.11 |
| 212.5215 | 97.39  | 16.61 | 7.91  | 8.47  | 9.09  | 1.88 |
| 212.5617 | 83.68  | 16.41 | 19.48 | 19.08 | 18.56 | 1.65 |
| 212.6114 | 24.17  | 14.75 | 15.81 | 13.47 | 17.01 | 0.16 |
| 212.7152 | 233.62 | 13.33 | 14.67 | 14.79 | 14.67 | 0.66 |
| 212.8389 | 50.75  | 17.26 | 18.08 | 18.22 | 18.09 | 0.68 |
| 212.8519 | 114.36 | 11.18 | 19.14 | 15.08 | 18.68 | 1.25 |
| 212.9327 | 42.51  | 15.55 | 15.91 | 16.26 | 15.45 | 0.25 |
| 212.9387 | 37.29  | 16.19 | 19.02 | 18.92 | 18.78 | 1.92 |
| 212.9462 | 296.61 | 17.09 | 13.82 | 12.73 | 14.62 | 1.30 |
| 212.9472 | 33.2   | 11.51 | 16.94 | 17.95 | 16.34 | 1.56 |
| 212.9570 | 33.84  | 21.04 | 22.18 | 22.02 | 22.75 | 0.94 |
| 212.9788 | 56.68  | 18.02 | 17.16 | 17.99 | 18.58 | 0.25 |
| 213.0001 | 65.36  | 20.32 | 21.08 | 21.44 | 21.39 | 0.96 |
| 213.0163 | 187.23 | 13.57 | 18.59 | 18.97 | 18.23 | 1.63 |
| 213.0257 | 293.43 | 15.44 | 19.35 | 19.27 | 17.23 | 1.82 |
| 213.0262 | 50.38  | 8.62  | 14.57 | 13.68 | 13.94 | 1.43 |
| 213.0340 | 64.94  | 12.74 | 14.56 | 15.06 | 12.23 | 0.42 |
| 213.0443 | 56.88  | 16.72 | 14.68 | 13.54 | 14.21 | 0.92 |
| 213.0536 | 81.69  | 17.33 | 16.29 | 16.13 | 15.70 | 0.93 |

|          |        |       |       |       |       |      |
|----------|--------|-------|-------|-------|-------|------|
| 213.0638 | 72.64  | 17.21 | 16.92 | 16.66 | 16.70 | 0.40 |
| 213.0747 | 71.94  | 14.99 | 15.44 | 16.27 | 15.85 | 0.45 |
| 213.0796 | 24.55  | 11.90 | 14.93 | 10.03 | 15.64 | 0.37 |
| 213.0869 | 280.24 | 17.17 | 15.01 | 15.26 | 15.52 | 1.24 |
| 213.0870 | 128    | 17.46 | 15.07 | 15.24 | 15.55 | 1.56 |
| 213.0951 | 276.98 | 17.59 | 15.40 | 14.70 | 15.84 | 1.37 |
| 213.0977 | 90.13  | 17.39 | 17.66 | 17.60 | 17.60 | 0.20 |
| 213.1064 | 69.62  | 15.72 | 15.24 | 15.27 | 15.24 | 0.19 |
| 213.1122 | 173.09 | 17.74 | 15.52 | 15.78 | 16.14 | 1.32 |
| 213.1234 | 138.97 | 18.46 | 15.99 | 16.77 | 16.72 | 1.44 |
| 213.1306 | 29.87  | 15.26 | 14.42 | 17.78 | 16.70 | 0.40 |
| 213.1323 | 267.41 | 16.49 | 8.03  | 8.31  | 8.75  | 2.00 |
| 213.1481 | 271.49 | 17.35 | 15.83 | 15.43 | 16.06 | 1.35 |
| 213.1486 | 165.81 | 17.58 | 15.11 | 15.53 | 16.11 | 1.38 |
| 213.1636 | 23.83  | 18.63 | 15.48 | 16.57 | 17.29 | 1.42 |
| 213.1848 | 287.28 | 17.47 | 16.31 | 16.19 | 16.60 | 1.00 |
| 213.5195 | 86.43  | 15.44 | 16.72 | 16.34 | 16.16 | 0.98 |
| 213.5465 | 26.81  | 17.08 | 19.33 | 16.71 | 16.57 | 0.70 |
| 213.5605 | 81.95  | 13.47 | 15.97 | 15.66 | 15.15 | 1.29 |
| 213.5781 | 80.11  | 16.68 | 16.64 | 16.93 | 17.02 | 0.09 |
| 213.6191 | 23.86  | 16.28 | 15.43 | 12.97 | 16.67 | 0.64 |
| 213.6319 | 23.14  | 15.08 | 11.87 | 15.22 | 13.77 | 0.82 |
| 213.9410 | 188.52 | 18.04 | 16.25 | 15.70 | 18.26 | 0.97 |
| 213.9554 | 31.25  | 16.57 | 17.66 | 17.38 | 17.24 | 0.71 |
| 213.9609 | 40.71  | 16.23 | 16.69 | 16.33 | 17.58 | 0.21 |
| 213.9787 | 276.51 | 18.08 | 16.68 | 16.55 | 17.03 | 0.80 |
| 213.9892 | 272.71 | 15.46 | 18.52 | 18.85 | 17.91 | 1.45 |
| 213.9955 | 82.47  | 14.66 | 17.69 | 17.88 | 16.31 | 1.16 |
| 214.0041 | 52.76  | 20.00 | 19.12 | 20.82 | 19.97 | 0.10 |
| 214.0256 | 245.24 | 19.49 | 21.07 | 19.78 | 19.82 | 0.45 |
| 214.0343 | 252.51 | 13.83 | 17.22 | 16.78 | 14.90 | 1.20 |
| 214.0354 | 80.7   | 11.62 | 16.43 | 15.75 | 16.05 | 1.58 |
| 214.0431 | 229.97 | 15.94 | 14.76 | 14.93 | 14.63 | 0.60 |
| 214.0511 | 260.13 | 19.92 | 14.11 | 23.80 | 18.46 | 0.28 |
| 214.0586 | 77.41  | 19.09 | 20.18 | 20.29 | 20.03 | 1.05 |
| 214.0709 | 276.98 | 19.16 | 16.90 | 16.40 | 17.24 | 1.40 |
| 214.1037 | 26.84  | 16.19 | 17.51 | 16.77 | 19.03 | 0.62 |
| 214.1073 | 288.23 | 19.29 | 18.24 | 18.07 | 18.40 | 0.53 |
| 214.1187 | 63.89  | 14.88 | 14.83 | 15.74 | 13.85 | 0.06 |
| 214.1267 | 49.69  | 17.54 | 11.42 | 10.74 | 12.39 | 1.63 |
| 214.1435 | 279.36 | 17.21 | 15.70 | 15.55 | 15.84 | 1.21 |
| 214.1438 | 176.03 | 17.77 | 15.55 | 15.72 | 15.87 | 1.42 |
| 214.2165 | 266.52 | 16.75 | 14.46 | 14.25 | 15.65 | 1.33 |
| 214.2528 | 22.68  | 16.24 | 13.39 | 13.68 | 15.06 | 1.23 |
| 214.5174 | 281.25 | 19.65 | 21.40 | 22.47 | 20.86 | 0.91 |
| 214.5243 | 139.68 | 15.39 | 14.18 | 13.00 | 13.07 | 0.84 |
| 214.5272 | 248    | 14.68 | 16.95 | 16.13 | 15.00 | 0.43 |
| 214.5528 | 261.91 | 20.11 | 12.11 | 24.38 | 17.12 | 0.40 |
| 214.5589 | 76.64  | 17.80 | 17.49 | 17.56 | 17.15 | 0.32 |
| 214.6470 | 56.88  | 16.51 | 16.90 | 16.68 | 16.72 | 0.26 |
| 214.8358 | 48.48  | 17.49 | 18.10 | 18.25 | 18.08 | 0.57 |
| 214.8498 | 107.92 | 13.71 | 15.90 | 10.91 | 16.14 | 0.11 |
| 214.9176 | 262.42 | 22.15 | 16.71 | 17.10 | 18.03 | 1.63 |
| 214.9550 | 30.53  | 18.23 | 18.98 | 18.97 | 19.43 | 0.73 |
| 214.9692 | 119.4  | 9.45  | 14.96 | 12.24 | 14.90 | 1.06 |
| 214.9876 | 27.3   | 16.52 | 18.12 | 19.49 | 17.72 | 1.23 |

|          |        |       |       |       |       |      |
|----------|--------|-------|-------|-------|-------|------|
| 214.9985 | 87.77  | 14.36 | 15.64 | 15.85 | 15.74 | 0.80 |
| 215.0044 | 63.01  | 11.04 | 13.75 | 15.83 | 14.82 | 0.98 |
| 215.0190 | 271.94 | 17.09 | 18.00 | 18.78 | 17.71 | 0.69 |
| 215.0280 | 139.67 | 12.71 | 14.49 | 13.22 | 11.46 | 0.26 |
| 215.0341 | 78.75  | 14.57 | 14.85 | 14.11 | 15.47 | 0.05 |
| 215.0419 | 136.13 | 11.93 | 14.69 | 13.77 | 13.96 | 0.62 |
| 215.0520 | 202.2  | 18.68 | 22.01 | 18.49 | 21.58 | 0.63 |
| 215.0615 | 71.08  | 16.37 | 14.74 | 15.40 | 15.05 | 0.96 |
| 215.0688 | 68.66  | 18.38 | 19.72 | 19.38 | 19.71 | 1.12 |
| 215.0814 | 198.8  | 16.25 | 13.65 | 13.58 | 12.97 | 1.17 |
| 215.1025 | 280.13 | 20.11 | 18.06 | 17.43 | 18.17 | 1.05 |
| 215.1115 | 227.75 | 17.06 | 14.05 | 13.78 | 14.88 | 1.58 |
| 215.1277 | 289.81 | 17.66 | 16.51 | 16.51 | 16.14 | 0.80 |
| 215.1382 | 40.7   | 18.32 | 16.96 | 17.72 | 17.56 | 1.03 |
| 215.1426 | 195.25 | 16.72 | 14.07 | 14.16 | 14.59 | 1.52 |
| 215.1441 | 21.58  | 16.82 | 12.69 | 15.22 | 15.17 | 1.37 |
| 215.1641 | 203.98 | 16.31 | 13.20 | 13.84 | 13.80 | 0.99 |
| 215.1792 | 23.71  | 17.31 | 14.55 | 14.98 | 15.99 | 1.66 |
| 215.1793 | 278.43 | 17.11 | 15.33 | 15.18 | 15.84 | 1.01 |
| 215.5198 | 191.4  | 12.22 | 14.74 | 14.93 | 14.10 | 0.97 |
| 215.5405 | 227.49 | 13.96 | 15.12 | 15.53 | 15.07 | 1.01 |
| 215.5520 | 261.59 | 16.27 | 12.68 | 20.09 | 14.04 | 0.11 |
| 215.9364 | 158.83 | 16.27 | 14.49 | 13.89 | 16.09 | 0.94 |
| 215.9648 | 29.41  | 15.60 | 14.21 | 14.29 | 14.86 | 0.72 |
| 215.9780 | 31.5   | 14.76 | 11.78 | 17.30 | 16.47 | 0.07 |
| 216.0099 | 47.07  | 18.45 | 19.13 | 19.30 | 18.71 | 0.77 |
| 216.0213 | 138.2  | 15.74 | 15.05 | 12.50 | 13.33 | 0.79 |
| 216.0324 | 67.36  | 16.35 | 15.20 | 15.33 | 15.37 | 0.67 |
| 216.0522 | 198.06 | 16.76 | 18.12 | 18.55 | 18.55 | 1.01 |
| 216.0562 | 66.72  | 14.08 | 14.55 | 14.67 | 14.54 | 0.22 |
| 216.0631 | 190.7  | 17.76 | 21.59 | 16.58 | 19.61 | 0.36 |
| 216.0632 | 89.05  | 24.60 | 24.71 | 24.87 | 24.56 | 0.23 |
| 216.0730 | 55.29  | 14.67 | 14.42 | 13.35 | 14.52 | 0.40 |
| 216.0866 | 148.26 | 21.48 | 20.45 | 19.48 | 20.68 | 0.67 |
| 216.0961 | 283.31 | 17.37 | 15.69 | 15.62 | 15.95 | 1.13 |
| 216.0963 | 176.04 | 18.17 | 15.39 | 15.27 | 15.81 | 1.54 |
| 216.1058 | 215.11 | 17.02 | 13.86 | 13.93 | 14.43 | 1.53 |
| 216.1229 | 288.15 | 18.71 | 17.26 | 17.02 | 17.28 | 0.86 |
| 216.1594 | 278.91 | 17.54 | 15.83 | 15.54 | 16.10 | 1.29 |
| 216.1595 | 158.79 | 18.22 | 15.64 | 15.22 | 16.23 | 1.58 |
| 216.4940 | 113.54 | 20.08 | 12.89 | 16.93 | 13.47 | 1.36 |
| 216.5139 | 191.92 | 13.70 | 14.60 | 15.53 | 13.23 | 0.36 |
| 216.5295 | 86.18  | 14.82 | 16.50 | 16.56 | 15.38 | 0.90 |
| 216.5500 | 196.17 | 11.24 | 13.78 | 12.87 | 13.52 | 0.61 |
| 216.6063 | 26.3   | 17.07 | 19.00 | 18.35 | 20.90 | 0.94 |
| 216.6118 | 24.9   | 17.31 | 21.64 | 18.89 | 20.50 | 1.41 |
| 216.8331 | 49.11  | 16.47 | 15.81 | 15.84 | 16.26 | 0.57 |
| 216.8978 | 100.5  | 15.63 | 14.55 | 15.19 | 14.78 | 0.61 |
| 216.9223 | 33.87  | 20.64 | 22.30 | 22.35 | 22.43 | 1.24 |
| 216.9497 | 27.98  | 19.35 | 21.97 | 22.03 | 21.47 | 1.87 |
| 217.0603 | 97.85  | 16.44 | 14.36 | 15.44 | 14.51 | 0.65 |
| 217.0678 | 92.66  | 20.62 | 20.37 | 20.58 | 20.14 | 0.27 |
| 217.0819 | 71.14  | 17.15 | 16.38 | 16.69 | 16.97 | 0.44 |
| 217.0899 | 285.99 | 18.36 | 16.53 | 16.43 | 16.47 | 1.20 |
| 217.0904 | 20.44  | 17.19 | 14.79 | 13.35 | 15.03 | 1.50 |
| 217.1052 | 168.64 | 17.44 | 15.40 | 16.24 | 16.52 | 1.10 |



|          |        |       |       |       |       |      |
|----------|--------|-------|-------|-------|-------|------|
| 217.1136 | 24.89  | 15.31 | 19.24 | 16.43 | 18.11 | 1.19 |
| 217.1181 | 180.9  | 17.18 | 14.62 | 14.91 | 15.48 | 1.71 |
| 217.1223 | 198.19 | 16.55 | 14.09 | 14.46 | 14.68 | 1.26 |
| 217.1293 | 50.26  | 16.49 | 16.08 | 16.59 | 16.43 | 0.13 |
| 217.1384 | 23.13  | 14.29 | 11.28 | 16.05 | 14.29 | 0.32 |
| 217.1547 | 35.12  | 16.71 | 17.46 | 17.48 | 17.32 | 0.49 |
| 217.1585 | 22.87  | 16.91 | 13.78 | 14.83 | 15.27 | 1.67 |
| 217.1587 | 168.77 | 18.02 | 15.71 | 16.10 | 16.23 | 1.46 |
| 217.1948 | 23.17  | 17.63 | 15.81 | 15.82 | 16.34 | 1.58 |
| 217.1950 | 292.25 | 19.07 | 17.83 | 17.72 | 17.44 | 0.78 |
| 217.5105 | 99.33  | 16.05 | 13.36 | 16.12 | 14.73 | 0.66 |
| 217.5404 | 88.19  | 20.59 | 17.00 | 18.22 | 17.61 | 1.63 |
| 217.5723 | 98.52  | 20.81 | 18.63 | 19.22 | 18.64 | 1.26 |
| 217.5978 | 114.76 | 13.94 | 15.40 | 15.69 | 14.98 | 1.26 |
| 217.6143 | 25.57  | 13.83 | 16.90 | 14.66 | 17.62 | 0.80 |
| 217.6323 | 24.29  | 14.93 | 15.89 | 13.16 | 16.30 | 0.00 |
| 217.7068 | 235.03 | 21.32 | 22.88 | 23.94 | 22.37 | 0.94 |
| 217.9125 | 24.62  | 15.74 | 15.97 | 16.50 | 16.14 | 0.44 |
| 217.9260 | 48.86  | 15.76 | 15.82 | 16.07 | 16.17 | 0.18 |
| 217.9381 | 98.96  | 16.08 | 19.18 | 17.71 | 18.77 | 1.27 |
| 217.9969 | 24.39  | 11.58 | 13.65 | 13.48 | 14.30 | 1.49 |
| 218.0065 | 81.29  | 17.16 | 18.78 | 19.00 | 18.92 | 1.25 |
| 218.0125 | 45.06  | 14.95 | 19.03 | 12.94 | 14.73 | 0.38 |
| 218.0339 | 111.47 | 15.73 | 13.19 | 14.95 | 13.21 | 0.56 |
| 218.0414 | 237.05 | 19.03 | 20.57 | 21.82 | 20.15 | 0.95 |
| 218.0420 | 87.14  | 17.57 | 15.81 | 16.08 | 16.11 | 0.93 |
| 218.0625 | 257.95 | 15.02 | 13.57 | 15.65 | 15.57 | 0.19 |
| 218.0673 | 91.45  | 18.12 | 17.46 | 17.76 | 17.47 | 0.74 |
| 218.0935 | 184.88 | 17.86 | 14.78 | 14.90 | 15.46 | 1.72 |
| 218.1022 | 147.36 | 23.12 | 23.53 | 23.45 | 23.14 | 0.15 |
| 218.1119 | 276.86 | 21.06 | 19.27 | 18.82 | 19.64 | 0.95 |
| 218.1208 | 28.94  | 16.40 | 16.43 | 16.59 | 15.41 | 0.02 |
| 218.1386 | 41.88  | 24.21 | 24.69 | 24.66 | 24.48 | 0.58 |
| 218.1500 | 65.84  | 15.94 | 17.24 | 16.90 | 17.16 | 0.94 |
| 218.1537 | 24.16  | 18.31 | 17.04 | 18.48 | 18.23 | 0.37 |
| 218.1863 | 65.97  | 13.43 | 15.05 | 13.78 | 15.87 | 0.59 |
| 218.1984 | 209.93 | 16.53 | 13.63 | 14.09 | 14.83 | 1.45 |
| 218.3721 | 237.29 | 17.35 | 18.99 | 20.44 | 18.81 | 1.01 |
| 218.6401 | 23.97  | 16.50 | 18.55 | 16.17 | 18.68 | 0.66 |
| 218.7071 | 239.31 | 15.98 | 16.11 | 17.29 | 15.88 | 0.26 |
| 218.9197 | 49.39  | 18.85 | 20.50 | 20.58 | 20.67 | 1.22 |
| 218.9304 | 88.44  | 16.50 | 19.79 | 20.27 | 18.91 | 1.51 |
| 218.9539 | 30.22  | 18.60 | 14.91 | 14.89 | 16.61 | 1.59 |
| 218.9721 | 48.18  | 18.67 | 11.50 | 12.05 | 15.01 | 1.92 |
| 218.9745 | 283.36 | 16.17 | 19.55 | 19.32 | 17.91 | 1.47 |
| 218.9840 | 270.07 | 22.36 | 22.07 | 21.20 | 21.58 | 0.45 |
| 218.9842 | 118.69 | 22.29 | 21.94 | 22.29 | 21.83 | 0.19 |
| 218.9891 | 44.92  | 17.18 | 16.13 | 16.42 | 16.78 | 0.68 |
| 219.0052 | 255.05 | 20.87 | 23.65 | 24.05 | 23.10 | 1.70 |
| 219.0176 | 88.81  | 19.93 | 17.05 | 18.10 | 17.75 | 1.50 |
| 219.0264 | 62.85  | 19.69 | 18.71 | 18.45 | 18.52 | 1.00 |
| 219.0380 | 231.43 | 14.31 | 16.42 | 17.79 | 15.98 | 0.99 |
| 219.0418 | 99.77  | 21.72 | 18.41 | 20.17 | 18.84 | 1.28 |
| 219.0700 | 40.01  | 13.66 | 15.09 | 13.11 | 17.10 | 0.33 |
| 219.0877 | 210.14 | 16.89 | 13.62 | 13.88 | 14.22 | 1.37 |
| 219.0971 | 185.35 | 17.46 | 15.26 | 15.66 | 15.58 | 1.35 |

|          |        |       |       |       |       |      |
|----------|--------|-------|-------|-------|-------|------|
| 219.0975 | 83.34  | 19.57 | 20.40 | 20.92 | 20.71 | 0.78 |
| 219.1022 | 242.22 | 15.97 | 13.30 | 13.00 | 13.42 | 1.13 |
| 219.1055 | 279.45 | 20.52 | 19.38 | 18.51 | 19.14 | 0.77 |
| 219.1243 | 28.23  | 18.01 | 17.44 | 17.24 | 17.00 | 0.73 |
| 219.1244 | 169.87 | 17.17 | 14.36 | 14.39 | 15.23 | 1.76 |
| 219.1339 | 126.07 | 19.92 | 21.10 | 20.92 | 20.93 | 0.87 |
| 219.1381 | 281.45 | 17.13 | 15.71 | 15.89 | 15.82 | 0.90 |
| 219.1419 | 37.05  | 20.85 | 21.43 | 21.38 | 21.11 | 0.61 |
| 219.1570 | 23.98  | 15.52 | 12.63 | 14.28 | 14.48 | 0.78 |
| 219.1741 | 284.27 | 20.07 | 19.45 | 19.34 | 19.36 | 0.36 |
| 219.2105 | 24.02  | 18.19 | 16.39 | 16.58 | 17.03 | 1.61 |
| 219.2105 | 297.97 | 18.19 | 18.23 | 18.06 | 18.36 | 0.00 |
| 219.5201 | 275.89 | 15.55 | 16.84 | 17.42 | 16.25 | 1.07 |
| 219.5434 | 97.71  | 18.58 | 14.40 | 16.11 | 15.48 | 1.42 |
| 219.5592 | 128.2  | 13.17 | 14.27 | 14.19 | 15.41 | 0.55 |
| 219.6481 | 251.21 | 20.98 | 17.40 | 17.71 | 17.79 | 1.62 |
| 219.6482 | 147.57 | 18.98 | 16.12 | 15.77 | 16.39 | 1.70 |
| 219.9312 | 87.12  | 15.28 | 15.46 | 15.94 | 15.60 | 0.29 |
| 219.9357 | 119.42 | 12.75 | 13.31 | 10.74 | 14.28 | 0.08 |
| 219.9681 | 275.72 | 18.97 | 19.09 | 19.12 | 19.01 | 0.11 |
| 219.9883 | 111.53 | 17.95 | 16.00 | 17.20 | 16.33 | 1.07 |
| 220.0085 | 275.68 | 15.77 | 19.43 | 20.02 | 18.79 | 1.74 |
| 220.0087 | 51.75  | 15.16 | 13.21 | 14.18 | 14.24 | 0.68 |
| 220.0369 | 252.2  | 13.01 | 14.10 | 14.60 | 13.38 | 0.49 |
| 220.0667 | 53.84  | 16.32 | 14.99 | 13.79 | 16.94 | 0.63 |
| 220.0814 | 75.88  | 16.39 | 15.60 | 15.18 | 16.62 | 0.56 |
| 220.0926 | 66.15  | 16.80 | 15.92 | 16.76 | 16.06 | 0.42 |
| 220.1000 | 278.78 | 17.96 | 16.13 | 16.04 | 16.49 | 1.35 |
| 220.1083 | 180.84 | 16.76 | 13.72 | 14.03 | 14.74 | 1.64 |
| 220.1179 | 35.22  | 22.54 | 21.47 | 21.33 | 21.36 | 1.33 |
| 220.1274 | 286.24 | 17.60 | 16.05 | 16.33 | 16.02 | 1.21 |
| 220.1275 | 176.3  | 17.95 | 15.98 | 16.09 | 16.27 | 1.29 |
| 220.1314 | 23.14  | 14.70 | 14.71 | 17.70 | 14.58 | 0.42 |
| 220.1331 | 209.08 | 16.55 | 13.21 | 12.35 | 14.32 | 1.51 |
| 220.1362 | 133.81 | 16.33 | 17.29 | 17.63 | 17.37 | 1.01 |
| 220.1424 | 29.76  | 16.67 | 14.74 | 15.94 | 15.80 | 0.57 |
| 220.1497 | 20.66  | 15.68 | 15.24 | 14.12 | 15.24 | 0.51 |
| 220.1777 | 168.47 | 17.44 | 15.09 | 15.28 | 15.67 | 1.34 |
| 220.2141 | 173.53 | 16.76 | 13.84 | 14.00 | 15.08 | 1.50 |
| 220.5505 | 95.5   | 18.59 | 17.17 | 17.89 | 17.08 | 0.64 |
| 220.5574 | 83.81  | 17.12 | 13.09 | 13.29 | 14.03 | 1.70 |
| 220.6327 | 23.78  | 14.82 | 12.35 | 15.21 | 13.32 | 0.55 |
| 220.6645 | 22.94  | 12.62 | 10.60 | 15.15 | 12.07 | 0.03 |
| 220.8835 | 120.89 | 17.84 | 9.58  | 12.47 | 11.91 | 1.64 |
| 220.9077 | 29.11  | 16.60 | 11.26 | 11.72 | 12.18 | 2.01 |
| 220.9280 | 87.31  | 15.57 | 15.93 | 16.21 | 15.82 | 0.37 |
| 220.9678 | 74.96  | 22.96 | 20.03 | 20.26 | 21.64 | 1.70 |
| 220.9730 | 98.15  | 14.94 | 13.49 | 14.81 | 14.51 | 0.47 |
| 220.9816 | 92.73  | 12.33 | 15.71 | 16.07 | 14.25 | 1.05 |
| 220.9935 | 86.15  | 15.35 | 14.95 | 15.05 | 15.19 | 0.29 |
| 221.0010 | 70.13  | 19.88 | 20.31 | 21.20 | 20.69 | 0.91 |
| 221.0094 | 270.34 | 15.38 | 15.21 | 16.43 | 15.41 | 0.28 |
| 221.0185 | 78.33  | 20.66 | 22.02 | 21.37 | 21.28 | 1.01 |
| 221.0298 | 87     | 16.39 | 17.61 | 18.39 | 17.62 | 0.81 |
| 221.0591 | 142.52 | 16.59 | 16.56 | 15.07 | 16.15 | 0.44 |
| 221.0765 | 96.89  | 17.53 | 18.97 | 18.82 | 18.68 | 1.18 |

|          |        |       |       |       |       |      |
|----------|--------|-------|-------|-------|-------|------|
| 221.0844 | 25.61  | 15.44 | 16.17 | 16.57 | 16.81 | 0.51 |
| 221.0920 | 43.33  | 16.89 | 14.86 | 16.64 | 15.96 | 0.57 |
| 221.1033 | 290.21 | 18.47 | 17.63 | 17.62 | 17.66 | 0.48 |
| 221.1129 | 52.53  | 15.83 | 15.51 | 15.78 | 15.88 | 0.18 |
| 221.1200 | 26.37  | 19.32 | 21.19 | 19.61 | 21.43 | 0.84 |
| 221.1227 | 172.04 | 18.27 | 13.97 | 15.49 | 14.51 | 1.37 |
| 221.1533 | 24.51  | 18.52 | 16.40 | 17.33 | 17.30 | 1.54 |
| 221.1535 | 276    | 18.92 | 16.83 | 16.68 | 17.46 | 1.13 |
| 221.1623 | 51.49  | 17.24 | 15.10 | 16.64 | 16.35 | 0.67 |
| 221.1859 | 50.44  | 19.45 | 17.82 | 19.12 | 19.01 | 0.63 |
| 221.1898 | 284.48 | 17.45 | 16.21 | 15.99 | 16.33 | 1.08 |
| 221.1900 | 152.07 | 17.89 | 15.98 | 16.30 | 16.75 | 1.34 |
| 221.2262 | 22.81  | 16.70 | 11.78 | 13.33 | 13.50 | 1.66 |
| 221.2263 | 173.89 | 17.13 | 14.51 | 14.84 | 15.30 | 1.58 |
| 221.4267 | 30.83  | 13.26 | 9.88  | 16.19 | 13.54 | 0.14 |
| 221.4912 | 92.88  | 13.98 | 13.54 | 14.96 | 13.34 | 0.02 |
| 221.5082 | 94.55  | 15.97 | 15.99 | 16.05 | 15.85 | 0.02 |
| 221.5305 | 87.78  | 15.71 | 15.45 | 16.38 | 15.78 | 0.10 |
| 221.5667 | 80.19  | 19.07 | 18.38 | 19.24 | 17.80 | 0.36 |
| 221.6207 | 24.41  | 16.42 | 18.99 | 17.66 | 19.45 | 1.18 |
| 221.6438 | 30.41  | 12.58 | 11.45 | 14.61 | 10.68 | 0.01 |
| 221.9275 | 93.26  | 14.96 | 13.06 | 14.92 | 14.14 | 0.31 |
| 221.9678 | 53.5   | 17.14 | 12.14 | 12.63 | 15.05 | 1.73 |
| 221.9712 | 60.23  | 18.17 | 13.72 | 13.59 | 15.66 | 1.47 |
| 221.9842 | 92.02  | 17.20 | 16.00 | 16.13 | 16.16 | 0.98 |
| 222.0012 | 85.87  | 14.66 | 17.36 | 17.33 | 16.94 | 1.27 |
| 222.0062 | 44.78  | 16.17 | 17.23 | 16.23 | 17.79 | 0.32 |
| 222.0124 | 106.12 | 16.25 | 16.94 | 16.78 | 16.15 | 0.22 |
| 222.0229 | 270.99 | 19.47 | 21.64 | 22.10 | 20.38 | 0.94 |
| 222.0290 | 86.4   | 20.35 | 23.56 | 22.88 | 22.76 | 1.64 |
| 222.0377 | 93.35  | 15.71 | 15.29 | 16.00 | 15.61 | 0.06 |
| 222.0404 | 41.12  | 16.64 | 13.33 | 16.64 | 15.39 | 0.68 |
| 222.0587 | 86.6   | 18.52 | 17.50 | 18.07 | 17.54 | 0.65 |
| 222.0684 | 76.38  | 16.94 | 15.52 | 15.59 | 15.51 | 0.79 |
| 222.0731 | 29.07  | 14.53 | 15.85 | 12.31 | 16.28 | 0.02 |
| 222.0800 | 24.79  | 14.54 | 17.73 | 16.05 | 18.69 | 1.16 |
| 222.0834 | 80.61  | 17.45 | 15.53 | 15.48 | 15.43 | 1.12 |
| 222.0972 | 129.92 | 16.34 | 14.75 | 14.94 | 15.41 | 1.27 |
| 222.1068 | 208.02 | 15.68 | 9.60  | 11.34 | 11.68 | 1.17 |
| 222.1144 | 278.23 | 17.79 | 15.78 | 15.80 | 15.91 | 1.22 |
| 222.1223 | 25.21  | 15.49 | 14.56 | 13.31 | 16.48 | 0.45 |
| 222.1269 | 24.29  | 16.93 | 19.97 | 18.10 | 19.66 | 1.24 |
| 222.1430 | 283.92 | 17.93 | 16.37 | 16.21 | 15.34 | 0.93 |
| 222.1488 | 170.02 | 16.99 | 14.86 | 15.25 | 15.35 | 1.43 |
| 222.1570 | 197.85 | 15.78 | 10.38 | 12.72 | 12.10 | 1.28 |
| 222.3872 | 280.09 | 15.28 | 16.27 | 16.37 | 15.74 | 0.69 |
| 222.5048 | 161.57 | 12.09 | 14.40 | 13.58 | 13.94 | 0.53 |
| 222.5246 | 267.91 | 17.22 | 18.47 | 18.54 | 17.06 | 0.78 |
| 222.6285 | 24.13  | 16.31 | 17.72 | 16.24 | 17.56 | 0.49 |
| 222.6445 | 59.26  | 15.98 | 14.74 | 15.41 | 15.28 | 0.47 |
| 222.8677 | 48.05  | 19.36 | 21.27 | 21.30 | 21.07 | 1.33 |
| 222.9412 | 41.99  | 15.30 | 16.33 | 16.09 | 16.32 | 0.70 |
| 222.9682 | 117.81 | 17.55 | 15.87 | 14.10 | 17.07 | 0.84 |
| 222.9772 | 119.06 | 16.57 | 15.06 | 14.85 | 15.41 | 1.09 |
| 222.9886 | 67.35  | 18.73 | 18.61 | 18.28 | 18.60 | 0.23 |
| 223.0060 | 107.71 | 17.16 | 15.62 | 15.05 | 15.54 | 0.80 |

|          |        |       |       |       |       |      |
|----------|--------|-------|-------|-------|-------|------|
| 223.0226 | 77.26  | 15.02 | 16.46 | 14.91 | 16.29 | 0.35 |
| 223.0307 | 272.63 | 15.31 | 16.59 | 15.56 | 14.74 | 0.15 |
| 223.0637 | 169.75 | 17.41 | 15.86 | 16.00 | 16.05 | 1.30 |
| 223.0748 | 159.72 | 18.12 | 19.59 | 19.43 | 19.41 | 1.00 |
| 223.0822 | 24.19  | 14.56 | 16.13 | 13.06 | 17.33 | 0.25 |
| 223.0964 | 207.94 | 16.51 | 13.49 | 13.92 | 14.40 | 1.47 |
| 223.1004 | 24.68  | 11.18 | 15.62 | 10.50 | 16.10 | 0.73 |
| 223.1077 | 35.17  | 17.76 | 16.73 | 16.78 | 16.91 | 0.79 |
| 223.1152 | 23.77  | 13.68 | 14.80 | 12.49 | 15.49 | 0.17 |
| 223.1189 | 281.05 | 20.05 | 18.49 | 18.04 | 18.62 | 0.95 |
| 223.1328 | 282.79 | 17.90 | 15.54 | 16.77 | 16.38 | 0.84 |
| 223.1343 | 22.71  | 15.83 | 18.62 | 15.64 | 18.27 | 0.71 |
| 223.1691 | 22.52  | 17.67 | 14.29 | 14.84 | 15.86 | 1.79 |
| 223.1691 | 283.88 | 17.80 | 16.64 | 16.60 | 16.54 | 0.89 |
| 223.2056 | 282.69 | 17.24 | 16.16 | 15.95 | 16.23 | 0.84 |
| 223.2057 | 173.39 | 17.68 | 15.29 | 15.21 | 16.21 | 1.45 |
| 223.5039 | 182.86 | 10.96 | 14.19 | 13.46 | 13.96 | 0.77 |
| 223.5226 | 280.11 | 15.30 | 20.43 | 20.83 | 19.03 | 1.57 |
| 223.5301 | 106.18 | 16.89 | 15.88 | 15.98 | 16.15 | 0.59 |
| 223.5638 | 117.27 | 15.48 | 13.64 | 12.96 | 12.06 | 0.66 |
| 223.6355 | 39.26  | 14.99 | 16.70 | 15.80 | 16.93 | 0.67 |
| 223.9461 | 97.27  | 16.21 | 15.68 | 13.69 | 16.56 | 0.69 |
| 223.9545 | 43.4   | 14.86 | 15.11 | 14.23 | 15.33 | 0.03 |
| 223.9632 | 121.88 | 17.52 | 15.32 | 16.04 | 15.99 | 1.31 |
| 223.9722 | 60.52  | 18.38 | 18.47 | 19.44 | 18.31 | 0.38 |
| 223.9886 | 127.89 | 17.45 | 15.76 | 14.74 | 16.78 | 0.93 |
| 224.0080 | 86.78  | 16.18 | 18.12 | 18.06 | 17.05 | 1.29 |
| 224.0143 | 93.74  | 16.71 | 16.85 | 16.66 | 16.43 | 0.01 |
| 224.0191 | 249.89 | 14.24 | 14.45 | 14.87 | 13.99 | 0.14 |
| 224.0284 | 77.98  | 16.89 | 19.33 | 17.96 | 18.31 | 1.21 |
| 224.0433 | 59.42  | 18.09 | 15.88 | 16.55 | 15.91 | 1.40 |
| 224.0545 | 233.18 | 16.72 | 16.74 | 17.23 | 16.32 | 0.10 |
| 224.0587 | 70.43  | 15.39 | 15.98 | 16.27 | 17.75 | 0.62 |
| 224.0721 | 280.49 | 15.77 | 16.72 | 16.63 | 16.37 | 0.93 |
| 224.0781 | 146.04 | 15.14 | 13.88 | 14.01 | 14.51 | 0.72 |
| 224.0917 | 217.22 | 16.96 | 13.00 | 13.34 | 14.27 | 1.40 |
| 224.1030 | 202.59 | 16.20 | 12.02 | 13.52 | 13.42 | 1.36 |
| 224.1037 | 51.35  | 16.26 | 14.82 | 15.30 | 15.35 | 0.59 |
| 224.1129 | 58.49  | 15.56 | 14.34 | 14.58 | 15.15 | 0.45 |
| 224.1193 | 81.68  | 13.31 | 16.29 | 16.56 | 15.26 | 1.31 |
| 224.1224 | 228.23 | 16.26 | 10.19 | 8.94  | 12.25 | 1.37 |
| 224.1282 | 177.29 | 17.53 | 14.59 | 14.72 | 14.95 | 1.69 |
| 224.1588 | 214.54 | 16.47 | 11.62 | 12.77 | 12.13 | 1.20 |
| 224.1643 | 25.43  | 17.13 | 11.96 | 12.17 | 15.19 | 1.32 |
| 224.1645 | 199.35 | 16.19 | 12.52 | 12.97 | 13.71 | 1.26 |
| 224.5041 | 87.53  | 15.63 | 16.17 | 16.50 | 15.88 | 0.55 |
| 224.5183 | 108.7  | 14.99 | 17.39 | 16.24 | 15.96 | 0.92 |
| 224.5572 | 69.33  | 13.53 | 15.39 | 14.16 | 14.81 | 0.51 |
| 224.5799 | 79.63  | 16.27 | 17.21 | 16.53 | 17.11 | 0.57 |
| 224.6055 | 99.73  | 15.87 | 15.17 | 15.30 | 15.54 | 0.49 |
| 224.8648 | 47.89  | 18.80 | 20.69 | 20.73 | 20.49 | 1.31 |
| 224.9506 | 22.98  | 14.20 | 14.65 | 14.10 | 15.60 | 0.29 |
| 224.9575 | 42.3   | 14.92 | 15.79 | 15.48 | 16.15 | 0.53 |
| 224.9637 | 125    | 16.08 | 13.42 | 11.17 | 14.97 | 1.02 |
| 224.9895 | 79.04  | 16.60 | 14.88 | 14.26 | 15.46 | 0.96 |
| 225.0157 | 273.48 | 19.60 | 21.89 | 21.85 | 21.60 | 1.19 |

|          |        |       |       |       |       |      |
|----------|--------|-------|-------|-------|-------|------|
| 225.0206 | 292.92 | 14.60 | 15.05 | 15.39 | 14.12 | 0.22 |
| 225.0362 | 67.48  | 19.86 | 18.94 | 19.16 | 18.66 | 0.87 |
| 225.0466 | 63.69  | 21.93 | 20.84 | 21.31 | 20.53 | 0.90 |
| 225.0533 | 46.78  | 17.03 | 20.49 | 16.32 | 16.49 | 0.64 |
| 225.0796 | 24.27  | 14.97 | 14.66 | 12.87 | 16.28 | 0.35 |
| 225.0870 | 204.33 | 16.93 | 12.65 | 13.21 | 14.20 | 1.41 |
| 225.0910 | 171.87 | 17.35 | 15.08 | 15.20 | 15.61 | 1.35 |
| 225.0982 | 93.74  | 14.10 | 15.31 | 14.98 | 15.24 | 0.30 |
| 225.1121 | 178.5  | 17.09 | 15.20 | 14.92 | 15.66 | 1.50 |
| 225.1233 | 232.75 | 18.04 | 19.40 | 19.39 | 18.76 | 0.87 |
| 225.1483 | 286.05 | 18.09 | 16.60 | 16.67 | 16.85 | 1.09 |
| 225.1484 | 23.18  | 17.31 | 14.29 | 14.89 | 15.22 | 1.78 |
| 225.1847 | 287.42 | 17.43 | 16.41 | 16.12 | 16.46 | 0.87 |
| 225.1848 | 20.82  | 16.93 | 12.85 | 13.64 | 14.53 | 1.91 |
| 225.1960 | 283.84 | 18.27 | 17.09 | 17.02 | 17.00 | 1.04 |
| 225.2211 | 287.25 | 18.56 | 17.06 | 16.93 | 17.03 | 0.97 |
| 225.5335 | 286.43 | 14.75 | 13.67 | 14.90 | 11.63 | 0.32 |
| 225.5561 | 26.49  | 16.42 | 18.24 | 15.43 | 15.42 | 0.26 |
| 225.6117 | 27.05  | 17.01 | 19.27 | 18.55 | 20.70 | 1.20 |
| 225.9007 | 127.58 | 15.69 | 15.97 | 17.46 | 15.10 | 0.41 |
| 225.9701 | 44.97  | 20.75 | 20.41 | 20.65 | 20.52 | 0.37 |
| 225.9790 | 111.17 | 18.00 | 15.52 | 16.44 | 16.46 | 1.56 |
| 225.9920 | 259.47 | 14.79 | 12.74 | 11.54 | 12.27 | 0.72 |
| 225.9944 | 37.14  | 16.21 | 16.55 | 16.67 | 16.63 | 0.37 |
| 226.0190 | 277.13 | 15.33 | 16.36 | 16.29 | 16.34 | 0.42 |
| 226.0239 | 57.91  | 18.39 | 18.24 | 18.98 | 18.60 | 0.20 |
| 226.0450 | 48.91  | 20.63 | 21.13 | 21.47 | 21.55 | 0.79 |
| 226.0501 | 90.83  | 17.38 | 16.06 | 16.41 | 16.74 | 0.68 |
| 226.0670 | 80.47  | 17.51 | 14.36 | 14.39 | 14.50 | 1.33 |
| 226.0709 | 281.07 | 20.12 | 17.92 | 17.21 | 18.21 | 1.15 |
| 226.0744 | 89.99  | 16.10 | 12.66 | 16.26 | 19.21 | 0.43 |
| 226.0812 | 48.32  | 16.84 | 13.36 | 13.65 | 14.56 | 0.98 |
| 226.0820 | 139    | 15.08 | 12.79 | 13.17 | 13.82 | 0.60 |
| 226.1072 | 182.71 | 17.98 | 11.51 | 12.59 | 14.47 | 1.86 |
| 226.1073 | 277.46 | 17.30 | 11.65 | 12.77 | 14.63 | 1.73 |
| 226.1132 | 27.07  | 15.66 | 16.24 | 15.83 | 18.28 | 0.30 |
| 226.1437 | 189.16 | 17.16 | 13.94 | 14.42 | 14.87 | 1.64 |
| 226.1550 | 35.66  | 13.52 | 21.63 | 13.55 | 14.44 | 0.84 |
| 226.1589 | 273.75 | 19.04 | 17.89 | 17.58 | 17.63 | 0.85 |
| 226.1800 | 22.22  | 16.89 | 15.38 | 14.39 | 15.65 | 0.90 |
| 226.1801 | 190.58 | 17.29 | 14.82 | 14.78 | 15.44 | 1.60 |
| 226.2165 | 200.11 | 16.26 | 13.05 | 14.10 | 14.13 | 1.36 |
| 226.2246 | 204.73 | 15.97 | 9.37  | 12.49 | 12.28 | 1.23 |
| 226.5008 | 305.55 | 11.84 | 17.75 | 15.90 | 14.61 | 1.69 |
| 226.5519 | 112.04 | 13.09 | 14.43 | 14.49 | 15.21 | 0.62 |
| 226.5775 | 64.38  | 15.20 | 14.64 | 14.69 | 14.96 | 0.18 |
| 226.8620 | 48.19  | 16.92 | 17.93 | 17.99 | 17.85 | 0.99 |
| 226.9402 | 85.2   | 19.35 | 13.75 | 13.86 | 16.41 | 1.62 |
| 226.9514 | 48.07  | 21.92 | 21.61 | 21.59 | 22.03 | 0.26 |
| 226.9627 | 264.75 | 18.07 | 17.19 | 17.70 | 17.97 | 0.53 |
| 226.9725 | 29.38  | 16.50 | 16.14 | 16.51 | 16.02 | 0.26 |
| 226.9868 | 21.98  | 14.54 | 17.01 | 16.89 | 16.45 | 1.55 |
| 226.9935 | 32.12  | 14.95 | 13.67 | 15.13 | 13.48 | 0.40 |
| 227.0269 | 70.79  | 17.82 | 12.44 | 13.74 | 14.42 | 1.32 |
| 227.0338 | 88.9   | 17.54 | 15.99 | 17.58 | 16.40 | 0.73 |
| 227.0419 | 49.8   | 21.05 | 22.02 | 22.04 | 21.77 | 0.75 |

|          |        |       |       |       |       |      |
|----------|--------|-------|-------|-------|-------|------|
| 227.0485 | 55.58  | 18.45 | 18.24 | 18.12 | 18.71 | 0.22 |
| 227.0660 | 174.7  | 13.15 | 16.75 | 16.23 | 15.81 | 1.03 |
| 227.1025 | 285.1  | 18.83 | 16.67 | 16.55 | 16.78 | 1.38 |
| 227.1139 | 72.32  | 18.95 | 20.48 | 20.19 | 19.96 | 1.27 |
| 227.1266 | 25.38  | 17.36 | 13.29 | 13.93 | 14.95 | 1.82 |
| 227.1277 | 288.68 | 17.85 | 16.65 | 16.73 | 16.47 | 0.98 |
| 227.1389 | 23.08  | 15.98 | 17.39 | 13.08 | 12.73 | 0.36 |
| 227.1390 | 214.77 | 16.49 | 16.55 | 15.20 | 14.85 | 0.45 |
| 227.1583 | 27.58  | 16.41 | 17.79 | 15.26 | 15.28 | 0.05 |
| 227.1640 | 270.25 | 17.34 | 15.29 | 15.36 | 15.99 | 1.34 |
| 227.1754 | 163.33 | 17.02 | 16.22 | 16.77 | 16.05 | 0.64 |
| 227.1756 | 286.83 | 16.55 | 16.02 | 16.07 | 15.12 | 0.47 |
| 227.1777 | 20.56  | 17.33 | 13.05 | 14.47 | 15.76 | 1.41 |
| 227.2004 | 276.54 | 18.22 | 16.56 | 16.34 | 16.82 | 1.13 |
| 227.5142 | 85.77  | 15.29 | 15.62 | 16.16 | 15.27 | 0.35 |
| 227.5440 | 26.68  | 16.54 | 19.82 | 15.76 | 15.66 | 0.63 |
| 227.5668 | 59.57  | 16.95 | 15.20 | 16.85 | 16.21 | 0.60 |
| 227.6342 | 21.47  | 16.05 | 10.00 | 10.60 | 11.30 | 2.01 |
| 227.9444 | 51.37  | 19.47 | 21.31 | 21.44 | 20.90 | 1.38 |
| 227.9547 | 55.07  | 17.22 | 16.22 | 15.74 | 16.33 | 0.70 |
| 227.9683 | 44.7   | 18.38 | 17.78 | 18.12 | 18.28 | 0.51 |
| 228.0058 | 35.88  | 16.14 | 9.79  | 10.10 | 11.03 | 1.88 |
| 228.0210 | 52.29  | 17.37 | 14.91 | 15.81 | 15.08 | 0.83 |
| 228.0292 | 34.91  | 11.74 | 12.87 | 15.87 | 15.48 | 0.68 |
| 228.0381 | 91.04  | 14.08 | 16.12 | 16.15 | 16.26 | 1.04 |
| 228.0454 | 48.86  | 17.92 | 18.24 | 18.27 | 18.31 | 0.36 |
| 228.0574 | 110.66 | 17.01 | 14.36 | 14.28 | 15.02 | 1.58 |
| 228.0802 | 59.49  | 16.33 | 14.48 | 15.24 | 15.04 | 0.65 |
| 228.0865 | 281.38 | 21.59 | 20.29 | 19.67 | 20.40 | 0.82 |
| 228.0867 | 180.7  | 21.06 | 18.96 | 18.35 | 19.74 | 0.96 |
| 228.0979 | 102.2  | 17.08 | 16.83 | 17.34 | 16.63 | 0.09 |
| 228.1229 | 288.53 | 17.54 | 16.22 | 16.23 | 16.17 | 0.98 |
| 228.1594 | 154.98 | 17.27 | 15.46 | 15.60 | 15.87 | 1.45 |
| 228.1706 | 56.97  | 16.87 | 16.73 | 16.47 | 16.58 | 0.30 |
| 228.1955 | 24.97  | 15.09 | 13.50 | 11.37 | 13.37 | 0.65 |
| 228.2320 | 283.2  | 19.58 | 18.88 | 18.65 | 18.97 | 0.48 |
| 228.4643 | 113.58 | 16.39 | 12.14 | 15.11 | 13.48 | 0.90 |
| 228.4816 | 85.85  | 12.99 | 15.06 | 15.68 | 14.68 | 0.86 |
| 228.5594 | 82.07  | 15.59 | 17.08 | 15.34 | 16.64 | 0.46 |
| 228.6215 | 24.86  | 14.32 | 17.86 | 14.31 | 17.09 | 0.83 |
| 228.6626 | 57.59  | 15.88 | 14.57 | 15.86 | 14.43 | 0.29 |
| 228.8128 | 49.31  | 17.75 | 18.07 | 18.16 | 17.86 | 0.52 |
| 228.8653 | 117.95 | 16.31 | 8.73  | 12.21 | 11.42 | 1.47 |
| 228.9068 | 43.43  | 16.42 | 19.36 | 19.08 | 18.53 | 1.79 |
| 228.9478 | 49.72  | 14.49 | 14.00 | 14.28 | 14.53 | 0.21 |
| 228.9530 | 43.71  | 20.87 | 22.07 | 21.89 | 22.73 | 1.13 |
| 228.9620 | 93.68  | 16.71 | 15.07 | 15.02 | 15.59 | 0.83 |
| 228.9733 | 49.58  | 18.76 | 17.91 | 18.79 | 18.36 | 0.49 |
| 228.9785 | 259.02 | 18.47 | 17.14 | 17.09 | 17.15 | 0.89 |
| 228.9906 | 69.37  | 17.34 | 13.60 | 14.38 | 15.92 | 1.22 |
| 228.9959 | 86.57  | 15.46 | 16.04 | 15.96 | 15.95 | 0.41 |
| 229.0099 | 97.63  | 17.90 | 12.28 | 13.55 | 13.21 | 1.79 |
| 229.0182 | 66.13  | 16.30 | 10.81 | 13.92 | 12.05 | 1.12 |
| 229.0229 | 84.22  | 14.72 | 16.05 | 16.19 | 16.02 | 0.72 |
| 229.0533 | 93.84  | 15.57 | 15.95 | 16.40 | 16.28 | 0.63 |
| 229.0889 | 270.76 | 18.19 | 15.59 | 16.33 | 15.96 | 1.33 |

|          |        |       |       |       |       |      |
|----------|--------|-------|-------|-------|-------|------|
| 229.1070 | 208.36 | 15.11 | 12.13 | 12.49 | 13.28 | 0.85 |
| 229.1182 | 272.66 | 20.97 | 19.29 | 18.50 | 19.51 | 1.07 |
| 229.1295 | 64.27  | 17.71 | 17.94 | 18.23 | 17.64 | 0.31 |
| 229.1433 | 286.13 | 18.09 | 16.37 | 16.30 | 15.98 | 1.10 |
| 229.1546 | 49.98  | 22.96 | 22.69 | 22.73 | 22.84 | 0.39 |
| 229.1586 | 192.64 | 16.34 | 11.30 | 12.48 | 13.12 | 1.49 |
| 229.1798 | 188.77 | 16.25 | 13.16 | 13.80 | 14.09 | 0.99 |
| 229.1948 | 24.17  | 16.96 | 12.57 | 13.68 | 14.93 | 1.48 |
| 229.2355 | 215.05 | 16.78 | 14.57 | 14.79 | 15.29 | 1.50 |
| 229.5896 | 99.44  | 15.22 | 15.99 | 16.66 | 16.31 | 0.48 |
| 229.6323 | 23.81  | 14.99 | 16.34 | 14.11 | 16.59 | 0.23 |
| 229.9064 | 108.06 | 16.47 | 14.11 | 13.16 | 15.03 | 0.91 |
| 229.9286 | 44.18  | 17.51 | 19.51 | 18.99 | 18.76 | 1.07 |
| 229.9411 | 24.91  | 19.18 | 20.19 | 20.35 | 19.91 | 1.14 |
| 229.9495 | 42.11  | 14.26 | 13.85 | 13.38 | 15.08 | 0.18 |
| 229.9559 | 41.68  | 16.81 | 17.18 | 16.85 | 18.01 | 0.38 |
| 229.9731 | 100.46 | 15.02 | 15.81 | 16.37 | 15.38 | 0.50 |
| 229.9746 | 35.48  | 19.51 | 10.28 | 12.88 | 15.89 | 1.74 |
| 229.9803 | 63.3   | 18.78 | 16.83 | 18.59 | 17.45 | 0.73 |
| 230.0015 | 55.91  | 13.90 | 10.60 | 17.58 | 14.99 | 0.00 |
| 230.0298 | 54.06  | 17.05 | 15.57 | 18.38 | 16.26 | 0.18 |
| 230.0364 | 57.63  | 14.76 | 14.93 | 14.64 | 14.72 | 0.01 |
| 230.0446 | 75.66  | 16.17 | 16.83 | 16.72 | 16.89 | 0.48 |
| 230.0512 | 55.54  | 18.50 | 17.17 | 16.79 | 15.43 | 0.90 |
| 230.0552 | 82.77  | 15.74 | 16.43 | 16.53 | 16.83 | 0.55 |
| 230.0670 | 219.37 | 16.04 | 13.25 | 12.51 | 12.91 | 0.95 |
| 230.0787 | 73.05  | 16.37 | 16.01 | 16.16 | 15.52 | 0.27 |
| 230.0860 | 105.27 | 13.34 | 13.26 | 14.89 | 14.27 | 0.20 |
| 230.0958 | 68.66  | 23.91 | 24.34 | 24.80 | 24.39 | 0.73 |
| 230.0958 | 146.44 | 16.23 | 21.24 | 17.60 | 20.94 | 0.93 |
| 230.1161 | 29.35  | 17.20 | 17.64 | 16.69 | 17.43 | 0.03 |
| 230.1213 | 46.54  | 17.16 | 15.29 | 16.10 | 15.74 | 1.10 |
| 230.1215 | 172.51 | 17.93 | 14.68 | 14.30 | 15.33 | 1.78 |
| 230.1329 | 61.51  | 14.73 | 14.75 | 13.60 | 14.11 | 0.20 |
| 230.1386 | 169.15 | 18.83 | 16.73 | 17.12 | 17.32 | 1.41 |
| 230.1386 | 31.79  | 19.32 | 19.46 | 19.12 | 19.04 | 0.07 |
| 230.1580 | 50.59  | 19.63 | 19.11 | 19.31 | 19.20 | 0.66 |
| 230.1750 | 176.32 | 17.15 | 14.11 | 14.11 | 14.87 | 1.64 |
| 230.2477 | 22.8   | 19.39 | 18.91 | 18.92 | 19.67 | 0.30 |
| 230.3559 | 253.24 | 18.79 | 17.17 | 18.44 | 17.96 | 0.64 |
| 230.4953 | 135.77 | 15.15 | 17.59 | 18.13 | 16.92 | 1.24 |
| 230.5751 | 83.38  | 18.66 | 22.25 | 22.52 | 22.04 | 1.77 |
| 230.6286 | 35.07  | 15.26 | 17.12 | 17.00 | 16.53 | 0.74 |
| 230.6904 | 264.51 | 17.03 | 15.30 | 16.21 | 16.12 | 0.75 |
| 230.8099 | 49.21  | 17.78 | 18.13 | 18.23 | 17.96 | 0.58 |
| 230.8860 | 42.97  | 16.19 | 18.03 | 18.11 | 17.70 | 1.62 |
| 230.9047 | 41.59  | 14.43 | 16.35 | 16.01 | 15.87 | 1.29 |
| 230.9376 | 20.4   | 16.47 | 15.43 | 15.70 | 15.28 | 0.93 |
| 230.9432 | 115.05 | 13.06 | 17.27 | 14.77 | 17.15 | 1.12 |
| 230.9506 | 41.59  | 18.04 | 18.97 | 18.83 | 19.63 | 0.93 |
| 230.9586 | 44.84  | 18.95 | 12.78 | 11.96 | 15.89 | 1.16 |
| 230.9871 | 158.84 | 14.25 | 17.77 | 17.12 | 15.79 | 1.21 |
| 231.0269 | 280.91 | 14.27 | 18.94 | 19.16 | 17.43 | 1.64 |
| 231.0432 | 216.92 | 14.78 | 19.38 | 20.21 | 18.69 | 1.61 |
| 231.0546 | 55.29  | 22.14 | 20.81 | 21.02 | 19.92 | 0.85 |
| 231.0647 | 65.35  | 16.81 | 15.44 | 16.67 | 15.91 | 0.69 |

|          |        |       |       |       |       |      |
|----------|--------|-------|-------|-------|-------|------|
| 231.0765 | 83.13  | 16.92 | 19.68 | 20.02 | 19.64 | 1.74 |
| 231.0877 | 203.88 | 16.53 | 13.78 | 13.97 | 14.52 | 0.72 |
| 231.0927 | 59.02  | 16.50 | 16.16 | 16.91 | 16.47 | 0.00 |
| 231.0987 | 161.81 | 16.96 | 16.81 | 16.12 | 17.16 | 0.22 |
| 231.1054 | 291.01 | 18.63 | 18.66 | 18.46 | 18.62 | 0.03 |
| 231.1227 | 224.1  | 15.37 | 12.57 | 13.18 | 12.33 | 0.85 |
| 231.1338 | 280.84 | 17.84 | 15.62 | 15.02 | 16.15 | 1.31 |
| 231.1339 | 167.62 | 18.49 | 15.04 | 15.03 | 16.26 | 1.75 |
| 231.1379 | 297.14 | 17.11 | 15.58 | 15.77 | 15.75 | 0.91 |
| 231.1379 | 172.66 | 17.51 | 15.21 | 15.52 | 15.80 | 1.51 |
| 231.1702 | 30.75  | 19.35 | 20.16 | 20.09 | 19.74 | 0.64 |
| 231.1741 | 22.26  | 16.56 | 13.26 | 14.17 | 14.71 | 1.59 |
| 231.1744 | 169.51 | 17.07 | 14.88 | 14.93 | 15.34 | 1.34 |
| 231.2107 | 171.63 | 17.12 | 14.28 | 14.12 | 15.13 | 1.56 |
| 231.2510 | 22.89  | 16.62 | 14.71 | 15.02 | 16.45 | 1.05 |
| 231.3824 | 249.9  | 15.85 | 15.73 | 17.11 | 15.97 | 0.31 |
| 231.4986 | 87.34  | 15.28 | 16.78 | 17.20 | 16.70 | 0.89 |
| 231.5198 | 102.77 | 14.21 | 14.25 | 15.00 | 14.93 | 0.17 |
| 231.5681 | 141.34 | 10.52 | 13.63 | 12.02 | 11.96 | 0.76 |
| 231.5738 | 84.47  | 16.48 | 19.02 | 19.36 | 18.99 | 1.71 |
| 231.5954 | 24.36  | 13.72 | 14.68 | 11.66 | 16.44 | 0.03 |
| 231.6007 | 103.93 | 16.85 | 19.09 | 19.41 | 18.44 | 1.57 |
| 231.9272 | 34     | 14.86 | 15.65 | 15.36 | 16.02 | 0.45 |
| 231.9380 | 71.29  | 16.05 | 15.50 | 14.51 | 15.54 | 0.38 |
| 231.9681 | 264.74 | 17.27 | 17.01 | 17.40 | 17.44 | 0.04 |
| 231.9778 | 26.45  | 14.60 | 12.33 | 13.62 | 13.92 | 0.61 |
| 231.9838 | 44.73  | 20.10 | 20.34 | 20.14 | 19.83 | 0.07 |
| 231.9916 | 41.25  | 19.69 | 10.47 | 12.79 | 15.91 | 1.70 |
| 231.9973 | 124.23 | 14.76 | 13.98 | 13.15 | 13.69 | 0.39 |
| 232.0378 | 96.75  | 16.19 | 18.28 | 18.10 | 17.56 | 1.34 |
| 232.0763 | 83.85  | 17.88 | 21.02 | 20.72 | 20.35 | 1.67 |
| 232.0822 | 294.13 | 16.89 | 16.58 | 15.50 | 15.58 | 0.68 |
| 232.0910 | 269.25 | 19.03 | 16.53 | 16.27 | 16.88 | 1.48 |
| 232.1015 | 72.57  | 14.97 | 14.24 | 14.26 | 14.47 | 0.35 |
| 232.1078 | 208.64 | 15.74 | 8.94  | 8.74  | 10.49 | 1.65 |
| 232.1178 | 281.6  | 18.99 | 16.95 | 16.75 | 17.00 | 1.22 |
| 232.1279 | 210.15 | 15.84 | 9.49  | 9.27  | 11.34 | 1.55 |
| 232.1391 | 53.56  | 16.49 | 18.42 | 17.47 | 18.76 | 0.84 |
| 232.1541 | 34.52  | 24.78 | 24.66 | 25.12 | 24.67 | 0.06 |
| 232.1708 | 152.22 | 16.55 | 13.72 | 13.18 | 13.65 | 1.13 |
| 232.1724 | 24.04  | 15.46 | 14.22 | 15.85 | 14.76 | 0.20 |
| 232.4974 | 87.98  | 15.09 | 14.46 | 15.02 | 14.95 | 0.21 |
| 232.5776 | 85.01  | 16.12 | 17.99 | 17.51 | 17.59 | 1.32 |
| 232.8074 | 47.43  | 16.23 | 16.04 | 15.95 | 16.15 | 0.27 |
| 232.8964 | 47.61  | 20.94 | 22.78 | 22.82 | 22.72 | 1.60 |
| 232.9226 | 37.84  | 17.85 | 19.50 | 19.78 | 19.61 | 1.46 |
| 232.9281 | 273.2  | 20.63 | 14.89 | 15.75 | 15.99 | 1.51 |
| 232.9522 | 253.11 | 15.49 | 16.92 | 17.04 | 15.74 | 0.52 |
| 232.9587 | 122.19 | 13.07 | 13.88 | 10.44 | 13.37 | 0.18 |
| 232.9899 | 116.82 | 16.85 | 14.00 | 14.70 | 15.08 | 1.20 |
| 232.9988 | 68.64  | 14.79 | 16.64 | 16.62 | 15.49 | 0.65 |
| 233.0081 | 35.29  | 15.66 | 17.96 | 19.70 | 17.99 | 1.62 |
| 233.0247 | 254.03 | 17.37 | 16.43 | 18.02 | 16.66 | 0.14 |
| 233.0375 | 99.77  | 16.22 | 14.61 | 14.91 | 14.26 | 0.58 |
| 233.0422 | 237.67 | 12.37 | 14.22 | 15.12 | 14.60 | 1.36 |
| 233.0591 | 195.9  | 18.65 | 19.94 | 20.69 | 20.32 | 1.11 |



|          |        |       |       |       |       |      |
|----------|--------|-------|-------|-------|-------|------|
| 233.0631 | 52.08  | 16.29 | 15.43 | 15.34 | 15.96 | 0.52 |
| 233.0667 | 277.8  | 14.93 | 19.29 | 19.71 | 18.25 | 1.38 |
| 233.0761 | 84.09  | 16.00 | 17.63 | 17.19 | 17.31 | 1.03 |
| 233.0841 | 68.1   | 14.72 | 17.96 | 17.29 | 18.35 | 1.16 |
| 233.0949 | 58.94  | 15.84 | 14.70 | 15.63 | 15.30 | 0.48 |
| 233.1030 | 22.74  | 16.23 | 13.60 | 13.97 | 13.05 | 0.93 |
| 233.1034 | 271.76 | 17.38 | 15.01 | 14.63 | 15.55 | 1.35 |
| 233.1125 | 184.1  | 16.66 | 13.68 | 14.12 | 14.55 | 1.53 |
| 233.1182 | 286.2  | 17.29 | 14.73 | 14.76 | 14.36 | 1.10 |
| 233.1398 | 27.98  | 17.78 | 17.49 | 16.51 | 17.31 | 0.55 |
| 233.1535 | 283.87 | 18.09 | 16.71 | 16.74 | 16.70 | 1.07 |
| 233.1898 | 288.66 | 17.36 | 16.07 | 16.26 | 16.28 | 0.98 |
| 233.2261 | 23.73  | 16.91 | 12.43 | 13.39 | 14.33 | 1.58 |
| 233.2262 | 290.64 | 17.42 | 14.87 | 14.99 | 15.33 | 1.06 |
| 233.2263 | 164.95 | 17.58 | 14.83 | 14.71 | 15.70 | 1.47 |
| 233.5263 | 251.55 | 18.05 | 17.34 | 18.23 | 17.45 | 0.18 |
| 233.5312 | 122.55 | 17.37 | 12.61 | 15.26 | 13.99 | 1.05 |
| 233.5852 | 81.07  | 18.62 | 22.20 | 21.80 | 21.50 | 1.24 |
| 233.8999 | 48.36  | 15.26 | 16.34 | 16.40 | 16.54 | 1.04 |
| 233.9152 | 265.61 | 17.73 | 10.49 | 9.72  | 12.09 | 1.50 |
| 233.9664 | 298.37 | 17.65 | 14.20 | 13.28 | 15.30 | 1.51 |
| 233.9825 | 59.75  | 18.22 | 16.83 | 16.62 | 16.56 | 1.09 |
| 234.0007 | 101.71 | 16.04 | 15.22 | 15.42 | 15.70 | 0.32 |
| 234.0112 | 24.11  | 11.27 | 11.62 | 15.27 | 12.01 | 0.57 |
| 234.0236 | 68.93  | 15.99 | 12.03 | 12.64 | 12.56 | 1.06 |
| 234.0284 | 262.15 | 17.12 | 13.39 | 13.87 | 15.03 | 1.10 |
| 234.0430 | 63.16  | 14.90 | 15.08 | 15.34 | 15.00 | 0.13 |
| 234.0487 | 126    | 12.65 | 14.00 | 13.83 | 14.47 | 0.53 |
| 234.0522 | 78.71  | 15.74 | 15.41 | 15.67 | 15.62 | 0.11 |
| 234.0621 | 60.57  | 17.51 | 18.42 | 17.33 | 16.90 | 0.14 |
| 234.0623 | 193.33 | 13.85 | 15.15 | 15.15 | 15.37 | 0.54 |
| 234.0699 | 194.11 | 14.53 | 16.06 | 16.35 | 15.60 | 1.05 |
| 234.0809 | 36.74  | 13.98 | 17.30 | 14.30 | 16.84 | 0.76 |
| 234.0859 | 80.64  | 17.62 | 19.08 | 18.59 | 18.91 | 0.80 |
| 234.0971 | 274.65 | 18.31 | 16.11 | 15.98 | 16.35 | 1.43 |
| 234.1066 | 278.37 | 20.77 | 19.56 | 19.08 | 19.27 | 0.71 |
| 234.1157 | 206.26 | 16.53 | 13.08 | 13.44 | 13.51 | 1.35 |
| 234.1432 | 194.96 | 16.96 | 14.06 | 14.97 | 13.88 | 1.06 |
| 234.1488 | 191.87 | 16.77 | 13.57 | 14.04 | 14.42 | 1.63 |
| 234.1583 | 26.69  | 17.14 | 15.22 | 16.21 | 16.09 | 0.78 |
| 234.1813 | 75.85  | 13.52 | 14.72 | 13.12 | 14.63 | 0.25 |
| 234.5086 | 85.12  | 14.67 | 14.95 | 14.84 | 14.46 | 0.11 |
| 234.5121 | 139.19 | 15.75 | 17.65 | 16.66 | 15.95 | 0.80 |
| 234.5242 | 197.18 | 14.36 | 14.63 | 14.53 | 15.16 | 0.15 |
| 234.5390 | 122.43 | 18.27 | 17.35 | 16.53 | 16.42 | 0.94 |
| 234.5646 | 134.48 | 17.13 | 18.69 | 19.08 | 19.24 | 1.06 |
| 234.5685 | 132.58 | 14.32 | 17.09 | 17.42 | 14.39 | 1.03 |
| 234.5840 | 80.68  | 17.41 | 18.87 | 18.49 | 18.71 | 0.86 |
| 234.5899 | 24.16  | 14.19 | 15.96 | 12.58 | 17.77 | 0.27 |
| 234.7111 | 210.37 | 10.75 | 15.77 | 14.66 | 14.51 | 1.40 |
| 234.8937 | 48.47  | 19.49 | 21.25 | 21.32 | 21.17 | 1.59 |
| 234.9079 | 253.09 | 19.78 | 19.94 | 19.58 | 19.79 | 0.00 |
| 234.9402 | 39.65  | 16.73 | 16.44 | 16.60 | 17.26 | 0.08 |
| 234.9564 | 274.36 | 18.78 | 16.21 | 15.66 | 17.92 | 1.26 |
| 234.9624 | 31.31  | 19.20 | 21.41 | 20.80 | 20.89 | 1.67 |
| 234.9813 | 50.01  | 19.06 | 19.50 | 20.19 | 20.01 | 0.73 |

|          |        |       |       |       |       |      |
|----------|--------|-------|-------|-------|-------|------|
| 235.0039 | 174.74 | 12.68 | 16.44 | 15.89 | 14.35 | 1.05 |
| 235.0134 | 41.21  | 12.69 | 11.15 | 15.31 | 12.65 | 0.07 |
| 235.0208 | 243.64 | 16.93 | 18.32 | 20.21 | 18.46 | 1.13 |
| 235.0266 | 49.71  | 15.36 | 15.71 | 15.72 | 15.34 | 0.14 |
| 235.0308 | 188.89 | 14.31 | 15.45 | 15.76 | 15.20 | 0.76 |
| 235.0406 | 67.47  | 17.94 | 17.26 | 17.66 | 17.74 | 0.37 |
| 235.0477 | 75.26  | 15.09 | 16.59 | 16.31 | 15.75 | 0.79 |
| 235.0551 | 193.04 | 10.62 | 13.34 | 12.99 | 14.05 | 0.88 |
| 235.0555 | 69.45  | 16.69 | 16.27 | 16.35 | 16.46 | 0.29 |
| 235.0662 | 137.68 | 17.18 | 19.92 | 19.66 | 19.38 | 1.15 |
| 235.0924 | 169.92 | 14.18 | 14.61 | 12.48 | 15.38 | 0.09 |
| 235.0925 | 82.04  | 19.28 | 19.87 | 20.29 | 20.02 | 0.59 |
| 235.1118 | 69.39  | 14.46 | 14.69 | 14.73 | 14.60 | 0.09 |
| 235.1189 | 293.26 | 18.63 | 17.80 | 17.96 | 17.87 | 0.47 |
| 235.1312 | 164.13 | 15.89 | 14.60 | 14.20 | 14.90 | 0.79 |
| 235.1384 | 175.72 | 17.64 | 14.42 | 14.24 | 15.14 | 1.73 |
| 235.1682 | 103.84 | 19.82 | 17.53 | 18.28 | 17.93 | 1.26 |
| 235.2054 | 23.83  | 18.08 | 17.09 | 17.12 | 17.34 | 1.06 |
| 235.2055 | 287.82 | 19.92 | 19.25 | 19.18 | 19.31 | 0.38 |
| 235.2421 | 174.72 | 17.81 | 15.03 | 15.00 | 15.76 | 1.72 |
| 235.5061 | 306.13 | 13.95 | 19.68 | 18.26 | 16.99 | 1.91 |
| 235.5164 | 92.8   | 15.06 | 15.52 | 15.90 | 14.60 | 0.28 |
| 235.5624 | 129.7  | 13.59 | 13.12 | 13.82 | 14.29 | 0.01 |
| 235.5678 | 128.96 | 14.54 | 16.32 | 16.56 | 16.22 | 0.99 |
| 235.6330 | 37.74  | 13.10 | 15.33 | 15.13 | 15.64 | 0.85 |
| 235.9210 | 19.54  | 14.51 | 13.20 | 13.97 | 13.36 | 0.89 |
| 235.9404 | 281.17 | 16.72 | 13.00 | 13.12 | 15.74 | 0.95 |
| 235.9622 | 300.47 | 18.39 | 14.63 | 13.84 | 16.16 | 1.49 |
| 235.9655 | 53.78  | 16.10 | 15.62 | 14.24 | 15.56 | 0.57 |
| 235.9834 | 48.69  | 15.83 | 14.58 | 14.85 | 15.11 | 0.84 |
| 236.0076 | 304.15 | 10.68 | 14.63 | 12.16 | 10.63 | 0.81 |
| 236.0170 | 86.34  | 19.07 | 21.33 | 21.42 | 21.04 | 1.38 |
| 236.0237 | 209.8  | 11.38 | 15.39 | 14.64 | 14.38 | 1.35 |
| 236.0300 | 74.26  | 17.49 | 17.73 | 18.70 | 17.33 | 0.34 |
| 236.0476 | 118.11 | 16.19 | 15.62 | 12.98 | 13.80 | 0.88 |
| 236.0556 | 259.66 | 15.19 | 14.94 | 15.42 | 14.26 | 0.08 |
| 236.0641 | 129.91 | 14.91 | 15.18 | 15.25 | 15.53 | 0.28 |
| 236.0790 | 72.34  | 17.57 | 15.25 | 16.29 | 15.62 | 1.30 |
| 236.0957 | 93.23  | 16.50 | 14.04 | 15.98 | 15.99 | 0.67 |
| 236.1129 | 281.53 | 18.40 | 16.12 | 16.10 | 16.21 | 1.44 |
| 236.1223 | 139.8  | 20.97 | 22.70 | 22.18 | 22.65 | 0.55 |
| 236.1494 | 169.72 | 15.81 | 15.32 | 14.90 | 15.37 | 0.54 |
| 236.1644 | 19.5   | 16.62 | 12.35 | 12.65 | 13.68 | 1.80 |
| 236.1645 | 162.13 | 16.82 | 14.22 | 14.34 | 15.00 | 1.64 |
| 236.1725 | 19.5   | 16.64 | 13.05 | 13.81 | 14.24 | 1.91 |
| 236.1725 | 279.43 | 17.56 | 16.22 | 16.40 | 16.44 | 1.06 |
| 236.2088 | 295.3  | 16.59 | 15.41 | 15.43 | 15.52 | 0.71 |
| 236.2089 | 177.49 | 17.34 | 15.00 | 15.02 | 15.71 | 1.56 |
| 236.4572 | 156.29 | 11.13 | 14.80 | 15.19 | 13.64 | 1.42 |
| 236.5318 | 65.91  | 15.37 | 12.98 | 15.72 | 14.05 | 0.49 |
| 236.5357 | 125.49 | 15.39 | 12.21 | 14.56 | 13.08 | 1.08 |
| 236.5481 | 78.3   | 16.40 | 15.97 | 15.56 | 16.13 | 0.37 |
| 236.5571 | 82.58  | 13.60 | 15.64 | 16.34 | 16.76 | 1.16 |
| 236.6417 | 55.34  | 15.87 | 15.31 | 15.25 | 15.79 | 0.44 |
| 236.6476 | 58.52  | 15.65 | 15.74 | 15.84 | 15.20 | 0.03 |
| 236.8916 | 49.7   | 15.76 | 16.58 | 16.73 | 16.82 | 1.01 |

|          |        |       |       |       |       |      |
|----------|--------|-------|-------|-------|-------|------|
| 236.9071 | 21.91  | 15.80 | 9.73  | 11.02 | 11.56 | 1.79 |
| 236.9122 | 112    | 12.72 | 12.22 | 13.74 | 13.63 | 0.10 |
| 236.9300 | 301.73 | 16.67 | 16.42 | 15.98 | 15.33 | 0.46 |
| 236.9408 | 87.84  | 17.25 | 22.15 | 22.54 | 21.19 | 1.56 |
| 236.9568 | 239.62 | 19.54 | 16.95 | 15.74 | 18.69 | 1.36 |
| 236.9611 | 42.46  | 15.85 | 18.20 | 17.40 | 17.71 | 1.35 |
| 236.9751 | 53.65  | 20.53 | 21.08 | 21.52 | 20.93 | 0.96 |
| 236.9980 | 57.55  | 17.50 | 19.19 | 20.47 | 19.72 | 1.19 |
| 237.0157 | 269.56 | 19.15 | 22.52 | 22.84 | 21.85 | 1.76 |
| 237.0174 | 82.9   | 13.66 | 17.05 | 16.72 | 16.86 | 1.16 |
| 237.0210 | 27.11  | 14.11 | 13.34 | 13.40 | 15.31 | 0.27 |
| 237.0282 | 86.28  | 18.37 | 15.60 | 15.83 | 16.57 | 1.33 |
| 237.0362 | 204.53 | 16.49 | 18.00 | 17.97 | 18.54 | 0.95 |
| 237.0499 | 72.87  | 16.14 | 16.04 | 14.41 | 15.79 | 0.37 |
| 237.1169 | 26.3   | 23.39 | 23.57 | 23.26 | 23.45 | 0.03 |
| 237.1257 | 290.23 | 18.05 | 15.81 | 16.24 | 15.32 | 1.07 |
| 237.1484 | 277.61 | 17.58 | 15.98 | 16.12 | 16.36 | 1.12 |
| 237.1485 | 173.75 | 17.76 | 15.58 | 15.90 | 16.60 | 1.23 |
| 237.1846 | 23.2   | 17.18 | 14.48 | 15.07 | 15.70 | 1.64 |
| 237.1848 | 285.59 | 17.91 | 16.68 | 16.62 | 16.71 | 1.00 |
| 237.2210 | 24.36  | 18.97 | 17.52 | 17.30 | 17.92 | 1.39 |
| 237.2211 | 288.86 | 20.21 | 19.95 | 19.77 | 20.24 | 0.15 |
| 237.5352 | 73.49  | 14.21 | 14.30 | 14.77 | 15.85 | 0.22 |
| 237.5569 | 95.98  | 14.62 | 15.55 | 16.18 | 15.74 | 0.86 |
| 237.6372 | 60.81  | 14.66 | 14.04 | 15.10 | 14.17 | 0.10 |
| 237.6498 | 58.64  | 15.73 | 15.23 | 15.35 | 14.81 | 0.27 |
| 237.6679 | 56.74  | 15.73 | 14.94 | 15.56 | 14.74 | 0.25 |
| 237.9010 | 114.89 | 16.30 | 13.50 | 13.97 | 15.16 | 1.01 |
| 237.9419 | 88.95  | 14.43 | 18.70 | 19.33 | 17.59 | 1.49 |
| 237.9556 | 78.53  | 18.04 | 11.92 | 13.99 | 13.08 | 1.23 |
| 237.9732 | 53.55  | 21.82 | 21.84 | 21.74 | 21.10 | 0.14 |
| 237.9805 | 47.41  | 15.91 | 16.62 | 17.37 | 16.60 | 0.59 |
| 237.9910 | 30.26  | 15.01 | 17.73 | 21.43 | 19.86 | 1.41 |
| 238.0037 | 29.59  | 16.10 | 18.45 | 17.81 | 18.08 | 1.47 |
| 238.0152 | 85.94  | 19.62 | 17.88 | 18.21 | 17.98 | 1.07 |
| 238.0191 | 274.19 | 12.30 | 17.62 | 18.31 | 16.73 | 1.80 |
| 238.0327 | 84.43  | 16.03 | 16.05 | 15.83 | 16.37 | 0.01 |
| 238.0377 | 85.26  | 17.75 | 18.94 | 19.00 | 18.97 | 1.31 |
| 238.0450 | 90.17  | 21.14 | 22.16 | 21.66 | 21.77 | 1.04 |
| 238.0511 | 235.61 | 15.42 | 17.14 | 17.89 | 16.83 | 1.38 |
| 238.0587 | 91.62  | 16.24 | 18.61 | 19.14 | 17.82 | 1.55 |
| 238.0922 | 96.51  | 16.32 | 15.71 | 15.18 | 15.47 | 0.77 |
| 238.0991 | 24.78  | 17.40 | 11.06 | 11.64 | 13.25 | 1.92 |
| 238.1072 | 211.1  | 16.34 | 10.10 | 10.55 | 9.80  | 1.55 |
| 238.1202 | 24.68  | 20.90 | 20.83 | 20.59 | 20.88 | 0.09 |
| 238.1381 | 205.67 | 16.64 | 12.57 | 12.84 | 11.35 | 1.19 |
| 238.1437 | 209.84 | 16.59 | 12.63 | 13.45 | 12.14 | 1.14 |
| 238.1801 | 197.81 | 15.87 | 12.71 | 12.68 | 11.98 | 1.00 |
| 238.2244 | 21.91  | 16.65 | 13.48 | 13.69 | 14.74 | 1.76 |
| 238.2245 | 285.67 | 17.24 | 16.18 | 16.22 | 16.14 | 0.77 |
| 238.4707 | 276.41 | 17.16 | 15.14 | 15.53 | 15.61 | 0.86 |
| 238.4928 | 30.6   | 15.48 | 14.02 | 18.18 | 17.35 | 0.25 |
| 238.5205 | 85.37  | 15.04 | 16.88 | 17.37 | 16.35 | 1.20 |
| 238.5640 | 93.94  | 22.57 | 20.58 | 21.63 | 20.92 | 1.12 |
| 238.6259 | 27.27  | 16.79 | 20.00 | 18.96 | 19.62 | 1.58 |
| 238.8416 | 47.23  | 19.93 | 21.34 | 21.37 | 20.95 | 1.49 |

|          |        |       |       |       |       |      |
|----------|--------|-------|-------|-------|-------|------|
| 238.8842 | 22.3   | 15.66 | 13.35 | 12.58 | 15.98 | 0.63 |
| 238.8940 | 279.25 | 19.80 | 14.14 | 14.46 | 15.27 | 1.34 |
| 238.8941 | 126.44 | 18.47 | 12.67 | 13.69 | 13.30 | 1.61 |
| 238.9010 | 108.96 | 13.46 | 11.38 | 14.37 | 13.23 | 0.22 |
| 238.9289 | 301.92 | 15.97 | 15.65 | 12.90 | 13.29 | 0.60 |
| 238.9393 | 90.67  | 15.79 | 18.99 | 19.56 | 18.22 | 1.50 |
| 238.9525 | 128.16 | 17.95 | 15.13 | 15.03 | 16.78 | 1.19 |
| 238.9626 | 276.08 | 18.16 | 18.14 | 18.22 | 18.24 | 0.02 |
| 238.9753 | 56.58  | 18.02 | 17.47 | 17.68 | 17.23 | 0.42 |
| 239.0060 | 25.05  | 14.44 | 16.21 | 14.68 | 15.86 | 0.71 |
| 239.0167 | 86.35  | 18.25 | 20.04 | 20.61 | 20.24 | 1.56 |
| 239.0318 | 202.34 | 13.82 | 15.51 | 15.58 | 15.35 | 0.99 |
| 239.0489 | 73.09  | 16.79 | 20.50 | 16.52 | 16.58 | 0.83 |
| 239.0576 | 98.11  | 14.72 | 15.24 | 16.02 | 15.29 | 0.43 |
| 239.0656 | 86.18  | 19.80 | 17.47 | 18.59 | 18.10 | 1.24 |
| 239.0952 | 24.57  | 14.01 | 14.17 | 11.89 | 15.69 | 0.18 |
| 239.1028 | 206.53 | 17.22 | 13.02 | 13.02 | 13.39 | 1.51 |
| 239.1037 | 35.06  | 18.87 | 16.70 | 16.96 | 17.30 | 1.49 |
| 239.1137 | 80.14  | 16.02 | 16.18 | 15.81 | 16.17 | 0.02 |
| 239.1235 | 24.33  | 17.63 | 15.80 | 15.71 | 17.14 | 1.34 |
| 239.1277 | 25.17  | 16.44 | 17.65 | 17.15 | 17.41 | 1.05 |
| 239.1277 | 173.61 | 16.89 | 14.61 | 14.43 | 15.24 | 1.61 |
| 239.1489 | 23.7   | 19.69 | 14.42 | 15.02 | 16.02 | 1.90 |
| 239.1639 | 24.26  | 18.82 | 17.53 | 18.22 | 18.49 | 0.66 |
| 239.1641 | 275.33 | 17.95 | 16.54 | 16.47 | 16.93 | 1.25 |
| 239.2004 | 286.72 | 17.50 | 16.40 | 16.26 | 16.43 | 0.92 |
| 239.2367 | 23.82  | 18.88 | 15.74 | 16.24 | 16.60 | 1.85 |
| 239.2367 | 282.5  | 19.02 | 17.06 | 17.07 | 16.60 | 1.04 |
| 239.4873 | 92.26  | 16.16 | 16.09 | 16.87 | 16.01 | 0.18 |
| 239.5531 | 27.46  | 16.43 | 18.46 | 15.46 | 15.44 | 0.34 |
| 239.5664 | 87.77  | 17.21 | 12.07 | 15.54 | 13.94 | 1.30 |
| 239.6339 | 30.31  | 12.86 | 18.32 | 17.47 | 17.30 | 1.91 |
| 239.9200 | 105.4  | 16.15 | 16.25 | 14.09 | 16.73 | 0.39 |
| 239.9671 | 24.74  | 19.67 | 22.53 | 22.41 | 21.87 | 1.90 |
| 239.9876 | 30.88  | 15.12 | 12.39 | 17.30 | 14.97 | 0.20 |
| 240.0024 | 20.29  | 13.92 | 17.62 | 15.05 | 16.09 | 1.35 |
| 240.0177 | 84.86  | 15.50 | 15.52 | 16.13 | 16.29 | 0.44 |
| 240.0284 | 89.71  | 17.57 | 15.96 | 16.70 | 16.15 | 0.91 |
| 240.0536 | 108.83 | 15.21 | 12.85 | 17.47 | 19.02 | 0.11 |
| 240.0651 | 96.13  | 21.88 | 18.96 | 19.83 | 19.19 | 1.52 |
| 240.0866 | 268.64 | 17.40 | 15.57 | 15.33 | 16.07 | 1.11 |
| 240.0994 | 48.88  | 21.63 | 22.54 | 21.79 | 22.20 | 0.61 |
| 240.1078 | 114.35 | 14.77 | 14.14 | 14.48 | 14.70 | 0.25 |
| 240.1230 | 174.62 | 17.29 | 14.10 | 14.31 | 15.28 | 1.64 |
| 240.1521 | 30.74  | 16.23 | 8.81  | 9.99  | 10.01 | 1.86 |
| 240.1593 | 174.45 | 17.78 | 15.04 | 15.20 | 15.68 | 1.69 |
| 240.1593 | 275.68 | 17.47 | 14.98 | 14.80 | 15.89 | 1.36 |
| 240.1695 | 46.97  | 16.95 | 16.67 | 16.52 | 16.45 | 0.37 |
| 240.2320 | 27.21  | 15.91 | 14.37 | 13.75 | 15.98 | 0.43 |
| 240.2400 | 23.7   | 16.49 | 8.27  | 10.10 | 10.44 | 1.57 |
| 240.4951 | 95.96  | 14.84 | 14.14 | 15.28 | 13.95 | 0.18 |
| 240.5039 | 86.96  | 15.82 | 17.21 | 17.19 | 17.23 | 0.95 |
| 240.5606 | 88.3   | 16.91 | 12.76 | 14.57 | 13.88 | 1.19 |
| 240.5668 | 95.43  | 18.88 | 15.76 | 16.08 | 16.01 | 1.03 |
| 240.8388 | 47.24  | 19.47 | 20.84 | 20.87 | 20.45 | 1.46 |
| 240.8824 | 33.56  | 15.04 | 13.82 | 15.59 | 14.73 | 0.17 |

|          |        |       |       |       |       |      |
|----------|--------|-------|-------|-------|-------|------|
| 240.9717 | 115.65 | 15.31 | 15.38 | 13.01 | 15.41 | 0.24 |
| 240.9775 | 307.8  | 14.65 | 14.78 | 14.00 | 14.49 | 0.19 |
| 240.9960 | 86.31  | 16.13 | 17.87 | 17.61 | 17.21 | 1.21 |
| 240.9997 | 30.84  | 14.40 | 17.11 | 17.70 | 16.78 | 1.85 |
| 241.0120 | 60.08  | 18.71 | 19.05 | 19.76 | 19.19 | 0.65 |
| 241.0311 | 169.63 | 19.48 | 17.53 | 18.26 | 20.22 | 0.41 |
| 241.0440 | 86.75  | 15.78 | 16.57 | 16.16 | 16.15 | 0.59 |
| 241.0487 | 253.2  | 16.16 | 18.18 | 17.36 | 16.58 | 0.55 |
| 241.0568 | 94.42  | 15.26 | 9.05  | 11.88 | 14.29 | 1.09 |
| 241.0680 | 89.73  | 16.88 | 13.35 | 14.42 | 15.18 | 1.13 |
| 241.0723 | 81.24  | 18.36 | 17.61 | 18.35 | 17.44 | 0.29 |
| 241.0805 | 69.88  | 16.48 | 16.28 | 16.47 | 16.40 | 0.06 |
| 241.1037 | 45.36  | 17.28 | 18.45 | 17.73 | 18.27 | 0.71 |
| 241.1110 | 21.88  | 10.92 | 15.04 | 9.42  | 15.54 | 0.52 |
| 241.1171 | 127.37 | 18.08 | 14.77 | 14.80 | 15.53 | 1.69 |
| 241.1296 | 72.21  | 18.39 | 20.86 | 20.59 | 20.59 | 1.35 |
| 241.1434 | 160.9  | 17.32 | 15.08 | 14.76 | 15.78 | 1.58 |
| 241.1546 | 50.05  | 23.50 | 23.44 | 23.42 | 23.31 | 0.13 |
| 241.1710 | 23.89  | 15.18 | 15.42 | 12.61 | 13.35 | 0.66 |
| 241.1797 | 292.04 | 17.79 | 16.84 | 16.70 | 16.95 | 0.92 |
| 241.1948 | 23.77  | 16.75 | 12.47 | 14.11 | 14.66 | 1.41 |
| 241.1950 | 157.51 | 16.54 | 13.98 | 14.16 | 14.62 | 1.36 |
| 241.2161 | 286.85 | 18.67 | 17.06 | 16.81 | 17.23 | 1.10 |
| 241.5028 | 86.08  | 15.26 | 15.04 | 15.29 | 15.17 | 0.07 |
| 241.5597 | 84.59  | 15.02 | 16.68 | 16.64 | 17.04 | 1.20 |
| 241.5739 | 87.32  | 21.76 | 21.99 | 22.44 | 21.42 | 0.16 |
| 241.9466 | 89.34  | 16.77 | 20.26 | 20.71 | 19.49 | 1.60 |
| 241.9986 | 37.24  | 20.83 | 22.06 | 22.20 | 22.18 | 1.72 |
| 242.0053 | 87.01  | 15.77 | 17.05 | 16.88 | 16.54 | 0.78 |
| 242.0196 | 51.99  | 20.24 | 20.18 | 20.54 | 20.43 | 0.23 |
| 242.0345 | 166.23 | 20.71 | 19.92 | 20.48 | 21.33 | 0.18 |
| 242.0365 | 39.07  | 15.97 | 14.53 | 17.36 | 15.14 | 0.15 |
| 242.0422 | 237.86 | 15.45 | 14.01 | 14.88 | 15.03 | 0.56 |
| 242.0521 | 171.95 | 13.08 | 14.83 | 14.56 | 14.34 | 1.05 |
| 242.0635 | 83.68  | 17.09 | 17.21 | 16.97 | 17.47 | 0.07 |
| 242.0773 | 57.72  | 19.66 | 21.53 | 20.73 | 20.22 | 1.06 |
| 242.1021 | 282.78 | 19.64 | 16.80 | 16.74 | 17.18 | 1.17 |
| 242.1250 | 59.28  | 17.78 | 13.29 | 13.00 | 14.01 | 1.48 |
| 242.1327 | 67.05  | 15.93 | 16.87 | 16.44 | 16.99 | 0.55 |
| 242.1388 | 179.65 | 17.17 | 14.30 | 14.11 | 15.26 | 1.65 |
| 242.1579 | 52.39  | 20.39 | 20.25 | 20.40 | 20.12 | 0.15 |
| 242.1749 | 288.02 | 18.96 | 17.15 | 17.04 | 17.36 | 1.10 |
| 242.2477 | 288.79 | 18.11 | 17.07 | 17.21 | 17.14 | 0.67 |
| 242.5008 | 246.46 | 15.09 | 17.30 | 14.94 | 15.78 | 0.38 |
| 242.5093 | 244.32 | 14.41 | 14.41 | 15.55 | 14.81 | 0.38 |
| 242.5619 | 234.96 | 19.25 | 20.88 | 21.84 | 20.14 | 1.13 |
| 242.5761 | 76.57  | 17.71 | 16.40 | 16.50 | 15.71 | 0.90 |
| 242.6419 | 63.86  | 19.41 | 21.61 | 21.55 | 20.88 | 1.54 |
| 242.8362 | 47.32  | 17.30 | 18.48 | 18.52 | 18.18 | 1.46 |
| 242.9253 | 50.26  | 21.36 | 21.47 | 21.65 | 21.69 | 0.36 |
| 242.9477 | 92.81  | 15.43 | 16.04 | 16.50 | 15.19 | 0.34 |
| 242.9602 | 41.3   | 13.05 | 13.79 | 13.04 | 13.52 | 0.17 |
| 242.9684 | 29.44  | 15.53 | 14.03 | 14.20 | 13.91 | 0.89 |
| 242.9844 | 64.39  | 16.98 | 17.89 | 18.99 | 17.76 | 1.10 |
| 242.9927 | 167.93 | 15.54 | 21.18 | 19.81 | 19.03 | 1.15 |
| 243.0109 | 260.69 | 20.51 | 21.49 | 21.57 | 20.64 | 0.81 |

|          |        |       |       |       |       |      |
|----------|--------|-------|-------|-------|-------|------|
| 243.0263 | 273.9  | 20.74 | 23.19 | 23.13 | 22.93 | 1.26 |
| 243.0377 | 176.49 | 20.12 | 19.83 | 19.80 | 20.18 | 0.14 |
| 243.0433 | 230.41 | 17.66 | 21.86 | 22.38 | 20.58 | 1.64 |
| 243.0636 | 247.46 | 17.61 | 18.03 | 19.38 | 17.71 | 0.69 |
| 243.0738 | 263.59 | 18.64 | 20.18 | 21.44 | 19.53 | 1.08 |
| 243.0823 | 38.4   | 13.33 | 17.42 | 16.11 | 15.58 | 1.08 |
| 243.0975 | 200.21 | 17.47 | 11.21 | 11.80 | 13.37 | 1.81 |
| 243.1084 | 87.19  | 18.05 | 19.05 | 19.11 | 18.66 | 0.73 |
| 243.1227 | 230.27 | 17.05 | 14.60 | 14.50 | 15.10 | 1.51 |
| 243.1235 | 26.88  | 16.56 | 16.93 | 17.65 | 15.54 | 0.20 |
| 243.1339 | 173.76 | 16.87 | 17.72 | 15.60 | 15.33 | 0.21 |
| 243.1340 | 291.9  | 16.15 | 17.31 | 16.20 | 14.20 | 0.14 |
| 243.1436 | 60.68  | 17.26 | 19.31 | 19.30 | 18.63 | 1.46 |
| 243.1591 | 176.37 | 17.38 | 15.20 | 15.15 | 15.57 | 1.56 |
| 243.1783 | 212.28 | 16.50 | 12.53 | 11.97 | 13.02 | 0.98 |
| 243.1828 | 28.93  | 18.11 | 14.72 | 14.57 | 16.15 | 1.60 |
| 243.1955 | 178.13 | 16.93 | 14.10 | 14.15 | 15.23 | 1.59 |
| 243.2105 | 24.42  | 18.53 | 15.33 | 15.43 | 16.54 | 1.84 |
| 243.2106 | 280.21 | 18.11 | 15.88 | 15.96 | 15.89 | 1.15 |
| 243.2106 | 181.47 | 18.27 | 15.21 | 15.45 | 15.82 | 1.66 |
| 243.4939 | 168.08 | 13.75 | 16.88 | 16.25 | 15.31 | 0.92 |
| 243.5053 | 97.04  | 14.37 | 13.97 | 15.48 | 14.47 | 0.17 |
| 243.5125 | 258.25 | 17.40 | 17.61 | 17.76 | 17.01 | 0.17 |
| 243.5174 | 135.98 | 14.70 | 14.89 | 14.27 | 14.13 | 0.10 |
| 243.5467 | 107.36 | 16.78 | 17.46 | 17.51 | 17.46 | 0.62 |
| 243.5599 | 235.3  | 14.89 | 17.48 | 17.70 | 16.81 | 1.13 |
| 243.5644 | 129.56 | 13.65 | 14.88 | 14.59 | 15.99 | 0.60 |
| 243.5707 | 76.72  | 16.67 | 16.32 | 16.33 | 15.53 | 0.24 |
| 243.6451 | 59.87  | 14.98 | 15.35 | 15.28 | 15.74 | 0.29 |
| 243.9185 | 48.5   | 19.70 | 21.01 | 21.33 | 20.67 | 1.07 |
| 243.9287 | 50.41  | 16.77 | 15.37 | 15.19 | 15.75 | 1.03 |
| 243.9442 | 53.01  | 17.19 | 18.20 | 18.18 | 17.85 | 1.02 |
| 243.9964 | 34.22  | 18.00 | 19.06 | 19.28 | 19.21 | 1.39 |
| 244.0131 | 252.03 | 14.31 | 13.67 | 14.57 | 12.81 | 0.23 |
| 244.0187 | 59.05  | 17.09 | 16.71 | 16.42 | 16.36 | 0.61 |
| 244.0297 | 273.4  | 15.94 | 17.98 | 18.36 | 17.92 | 1.05 |
| 244.0497 | 227.92 | 14.15 | 13.93 | 14.53 | 14.87 | 0.04 |
| 244.0615 | 127.3  | 14.06 | 14.30 | 14.22 | 15.15 | 0.21 |
| 244.0666 | 86.94  | 17.37 | 19.71 | 19.84 | 19.10 | 1.47 |
| 244.0811 | 271.87 | 19.18 | 14.82 | 14.01 | 15.64 | 1.50 |
| 244.0931 | 67.9   | 21.46 | 20.19 | 20.46 | 20.39 | 1.27 |
| 244.1123 | 79.73  | 15.84 | 15.28 | 15.21 | 15.56 | 0.25 |
| 244.1178 | 285.62 | 18.77 | 17.11 | 16.81 | 17.01 | 0.96 |
| 244.1291 | 63.41  | 16.99 | 17.20 | 17.08 | 17.32 | 0.14 |
| 244.1356 | 23.9   | 16.90 | 17.40 | 17.24 | 15.83 | 0.12 |
| 244.1542 | 268.71 | 18.63 | 16.74 | 16.42 | 16.93 | 1.51 |
| 244.1656 | 60.73  | 17.46 | 16.77 | 17.17 | 16.94 | 0.47 |
| 244.1906 | 20.86  | 16.76 | 13.88 | 13.56 | 15.07 | 1.48 |
| 244.1906 | 160.73 | 17.68 | 15.30 | 15.58 | 15.79 | 1.47 |
| 244.2268 | 23.21  | 15.43 | 12.38 | 13.15 | 14.34 | 1.00 |
| 244.2633 | 22.61  | 16.26 | 13.53 | 14.54 | 14.14 | 1.16 |
| 244.4298 | 298.24 | 17.32 | 17.21 | 16.34 | 18.23 | 0.19 |
| 244.5072 | 93.23  | 18.10 | 11.82 | 12.54 | 12.85 | 1.75 |
| 244.5113 | 307.52 | 14.59 | 14.84 | 13.46 | 12.85 | 0.35 |
| 244.5454 | 92.64  | 18.00 | 16.20 | 17.41 | 17.34 | 0.93 |
| 244.5698 | 80.66  | 15.34 | 17.35 | 16.42 | 17.39 | 0.98 |

|          |        |       |       |       |       |      |
|----------|--------|-------|-------|-------|-------|------|
| 244.7255 | 300.02 | 15.15 | 15.83 | 16.26 | 16.36 | 0.69 |
| 244.7868 | 46.19  | 20.03 | 20.24 | 20.38 | 19.84 | 0.33 |
| 244.8674 | 21.53  | 17.77 | 10.98 | 11.53 | 12.08 | 2.05 |
| 244.9040 | 25.93  | 19.05 | 16.14 | 16.83 | 16.98 | 1.89 |
| 244.9234 | 50.47  | 17.37 | 17.16 | 17.36 | 17.57 | 0.09 |
| 244.9476 | 55.36  | 18.30 | 15.11 | 16.23 | 15.60 | 1.41 |
| 245.0086 | 82.5   | 16.01 | 20.19 | 20.36 | 18.46 | 1.49 |
| 245.0146 | 53.49  | 17.22 | 17.81 | 17.35 | 17.37 | 0.27 |
| 245.0415 | 231.4  | 15.84 | 18.75 | 18.82 | 17.53 | 1.15 |
| 245.0481 | 63.98  | 14.84 | 13.00 | 13.23 | 13.43 | 0.53 |
| 245.0597 | 59.64  | 17.92 | 19.13 | 18.65 | 18.14 | 0.51 |
| 245.0607 | 261.62 | 19.86 | 21.95 | 21.52 | 20.19 | 1.09 |
| 245.0687 | 84.18  | 15.48 | 15.98 | 15.56 | 16.61 | 0.37 |
| 245.0794 | 50.87  | 18.09 | 15.63 | 16.62 | 17.81 | 1.09 |
| 245.0962 | 48.36  | 17.94 | 15.86 | 16.62 | 16.59 | 0.97 |
| 245.1135 | 271.97 | 17.44 | 15.17 | 15.06 | 15.80 | 1.40 |
| 245.1214 | 204.09 | 15.73 | 8.52  | 12.13 | 12.54 | 1.30 |
| 245.1382 | 179.16 | 17.19 | 14.28 | 14.55 | 15.05 | 1.67 |
| 245.1392 | 28.15  | 17.63 | 18.20 | 17.96 | 17.16 | 0.25 |
| 245.1531 | 191.85 | 16.81 | 13.52 | 14.33 | 14.87 | 1.61 |
| 245.1858 | 26.44  | 17.44 | 17.79 | 17.78 | 17.78 | 0.37 |
| 245.1896 | 24.52  | 16.91 | 12.71 | 14.71 | 15.87 | 1.18 |
| 245.2261 | 23.83  | 19.31 | 17.56 | 17.83 | 18.36 | 1.40 |
| 245.2261 | 290.75 | 19.95 | 18.54 | 18.56 | 18.58 | 0.77 |
| 245.2263 | 170.88 | 19.54 | 18.30 | 18.50 | 18.44 | 0.83 |
| 245.3947 | 299.65 | 13.85 | 15.11 | 14.69 | 14.48 | 0.77 |
| 245.5459 | 100.6  | 16.49 | 15.74 | 16.18 | 15.76 | 0.52 |
| 245.5576 | 84.11  | 14.03 | 17.50 | 17.10 | 16.75 | 1.64 |
| 245.5625 | 263.38 | 17.22 | 19.44 | 18.22 | 17.57 | 1.08 |
| 245.5876 | 25.93  | 15.61 | 17.13 | 14.47 | 16.65 | 0.22 |
| 245.6155 | 27.68  | 15.22 | 18.50 | 17.29 | 17.69 | 1.66 |
| 245.9156 | 270.02 | 19.79 | 12.21 | 11.89 | 14.43 | 1.59 |
| 245.9156 | 43.93  | 18.70 | 19.63 | 19.92 | 19.34 | 1.10 |
| 245.9537 | 61.26  | 18.64 | 17.52 | 19.11 | 17.84 | 0.34 |
| 245.9682 | 88.45  | 16.58 | 21.68 | 21.84 | 20.22 | 1.76 |
| 245.9947 | 20.77  | 13.42 | 11.95 | 13.56 | 12.71 | 0.44 |
| 246.0100 | 87.91  | 11.13 | 15.86 | 16.10 | 14.28 | 1.38 |
| 246.0238 | 76.53  | 17.07 | 14.23 | 15.31 | 14.75 | 1.07 |
| 246.0379 | 85.36  | 14.57 | 16.32 | 15.54 | 15.98 | 0.63 |
| 246.0474 | 101.16 | 18.89 | 19.41 | 19.81 | 18.84 | 0.46 |
| 246.0631 | 255.75 | 13.31 | 16.03 | 16.17 | 14.40 | 1.12 |
| 246.0639 | 81.33  | 15.63 | 15.64 | 15.75 | 16.27 | 0.16 |
| 246.0795 | 48.24  | 16.19 | 16.17 | 16.19 | 17.00 | 0.07 |
| 246.0905 | 152.66 | 14.41 | 14.47 | 13.79 | 14.10 | 0.11 |
| 246.0970 | 284.72 | 20.29 | 19.18 | 18.68 | 19.68 | 0.60 |
| 246.1066 | 206.15 | 16.36 | 8.49  | 8.34  | 10.78 | 1.84 |
| 246.1085 | 60.8   | 15.22 | 15.00 | 15.06 | 14.44 | 0.26 |
| 246.1335 | 193.81 | 17.54 | 15.13 | 15.21 | 15.22 | 1.52 |
| 246.1447 | 55.23  | 17.01 | 15.80 | 15.83 | 16.20 | 1.01 |
| 246.1543 | 45.95  | 19.38 | 20.41 | 19.96 | 20.15 | 0.70 |
| 246.1698 | 30.86  | 24.34 | 24.35 | 24.83 | 24.52 | 0.21 |
| 246.1812 | 63.99  | 19.95 | 21.87 | 21.73 | 21.13 | 1.53 |
| 246.2294 | 23.66  | 17.08 | 13.91 | 14.32 | 15.22 | 1.60 |
| 246.2297 | 170.99 | 17.39 | 15.00 | 15.34 | 15.74 | 1.61 |
| 246.2425 | 23.03  | 14.94 | 13.45 | 13.44 | 14.53 | 0.66 |
| 246.6234 | 27.31  | 17.02 | 21.10 | 20.45 | 20.36 | 1.72 |

|          |        |       |       |       |       |      |
|----------|--------|-------|-------|-------|-------|------|
| 246.7839 | 47.77  | 20.16 | 20.39 | 20.52 | 19.92 | 0.29 |
| 246.9171 | 113.8  | 12.17 | 16.64 | 12.44 | 16.21 | 0.82 |
| 246.9690 | 85.87  | 14.32 | 17.84 | 18.04 | 16.60 | 1.67 |
| 246.9960 | 30.45  | 8.27  | 8.53  | 16.40 | 15.94 | 0.75 |
| 247.0068 | 87.4   | 15.66 | 16.66 | 16.79 | 15.81 | 0.79 |
| 247.0141 | 305.75 | 14.14 | 20.04 | 18.60 | 17.11 | 1.87 |
| 247.0285 | 55.26  | 20.80 | 19.14 | 20.22 | 18.41 | 0.83 |
| 247.0340 | 90.89  | 17.38 | 18.69 | 18.72 | 18.70 | 1.04 |
| 247.0577 | 233.43 | 18.63 | 20.31 | 17.52 | 19.33 | 0.15 |
| 247.0641 | 86.02  | 13.09 | 16.81 | 16.49 | 16.23 | 1.18 |
| 247.0927 | 65.72  | 16.34 | 15.57 | 16.23 | 16.24 | 0.30 |
| 247.1006 | 163.56 | 18.00 | 15.02 | 15.14 | 15.76 | 1.66 |
| 247.1189 | 26.5   | 14.68 | 14.87 | 15.09 | 9.96  | 0.10 |
| 247.1190 | 209.27 | 15.73 | 10.45 | 10.57 | 10.23 | 1.30 |
| 247.1276 | 45.61  | 18.30 | 19.72 | 19.63 | 19.72 | 1.58 |
| 247.1325 | 197.61 | 16.76 | 12.83 | 13.08 | 14.27 | 1.56 |
| 247.1400 | 65.87  | 16.11 | 15.09 | 15.82 | 15.28 | 0.30 |
| 247.1554 | 26.95  | 20.20 | 20.67 | 19.98 | 19.99 | 0.09 |
| 247.1651 | 52.91  | 18.53 | 17.69 | 16.95 | 17.90 | 0.64 |
| 247.1693 | 165.41 | 17.81 | 15.80 | 15.90 | 16.40 | 1.38 |
| 247.1846 | 59.07  | 16.25 | 18.41 | 18.21 | 17.63 | 1.40 |
| 247.2018 | 48.39  | 17.11 | 13.34 | 15.26 | 15.60 | 0.97 |
| 247.2056 | 209.98 | 16.43 | 10.31 | 11.06 | 13.01 | 1.48 |
| 247.2417 | 23.86  | 18.70 | 16.98 | 16.81 | 17.75 | 1.46 |
| 247.2420 | 170.05 | 18.95 | 18.05 | 18.13 | 18.50 | 0.67 |
| 247.4759 | 100.57 | 16.20 | 15.00 | 15.54 | 15.73 | 0.43 |
| 247.5157 | 306.52 | 14.40 | 16.23 | 14.78 | 13.83 | 0.67 |
| 247.5470 | 80.85  | 18.65 | 16.59 | 16.24 | 16.25 | 1.15 |
| 247.5580 | 251.58 | 12.49 | 15.64 | 16.39 | 15.58 | 1.45 |
| 247.9123 | 266.37 | 16.88 | 7.19  | 7.02  | 9.52  | 1.56 |
| 247.9286 | 54.56  | 17.02 | 8.78  | 9.56  | 11.05 | 1.90 |
| 247.9523 | 60.71  | 15.32 | 15.87 | 15.22 | 15.31 | 0.09 |
| 247.9658 | 87.39  | 15.63 | 18.25 | 18.57 | 17.42 | 1.40 |
| 247.9743 | 252.68 | 16.91 | 16.45 | 16.93 | 15.89 | 0.23 |
| 248.0318 | 241.09 | 14.76 | 17.41 | 17.31 | 16.87 | 1.06 |
| 248.0521 | 78.62  | 17.50 | 11.79 | 11.31 | 14.12 | 1.56 |
| 248.0610 | 151.13 | 16.81 | 18.49 | 18.46 | 18.43 | 1.09 |
| 248.0713 | 83.62  | 16.97 | 20.27 | 19.99 | 19.90 | 1.66 |
| 248.0877 | 103.66 | 16.20 | 16.81 | 16.64 | 16.63 | 0.62 |
| 248.0955 | 24.85  | 12.37 | 13.41 | 10.91 | 16.01 | 0.13 |
| 248.1127 | 281.13 | 19.43 | 16.51 | 16.21 | 16.72 | 1.50 |
| 248.1224 | 279.63 | 18.67 | 16.27 | 16.22 | 16.27 | 1.46 |
| 248.1491 | 57.2   | 24.56 | 26.22 | 25.08 | 24.55 | 0.85 |
| 248.1601 | 60.38  | 17.53 | 16.16 | 16.28 | 16.54 | 0.79 |
| 248.1645 | 211.4  | 16.11 | 10.27 | 11.87 | 13.07 | 1.49 |
| 248.1751 | 25.79  | 16.60 | 14.05 | 16.13 | 15.17 | 0.63 |
| 248.2451 | 23.61  | 16.53 | 12.03 | 12.78 | 14.63 | 1.44 |
| 248.2453 | 209.89 | 17.19 | 14.38 | 14.66 | 15.21 | 1.51 |
| 248.5727 | 83.3   | 14.94 | 17.45 | 16.96 | 17.37 | 1.41 |
| 248.7813 | 46.17  | 18.97 | 18.93 | 19.10 | 18.61 | 0.04 |
| 248.8704 | 47.23  | 20.63 | 22.20 | 22.30 | 22.02 | 1.82 |
| 248.8988 | 25.73  | 20.85 | 21.88 | 21.80 | 21.79 | 1.52 |
| 248.9583 | 253.41 | 15.96 | 17.78 | 17.69 | 16.97 | 0.72 |
| 248.9761 | 49.78  | 14.80 | 15.76 | 15.78 | 15.24 | 0.30 |
| 248.9906 | 36.78  | 11.51 | 8.44  | 15.04 | 10.53 | 0.08 |
| 249.0315 | 73.8   | 18.53 | 17.01 | 17.77 | 17.50 | 1.04 |



|          |        |       |       |       |       |      |
|----------|--------|-------|-------|-------|-------|------|
| 249.0455 | 84.09  | 18.84 | 21.00 | 21.35 | 21.12 | 1.59 |
| 249.0539 | 218.14 | 11.37 | 10.58 | 13.49 | 15.18 | 0.20 |
| 249.0629 | 121.59 | 13.64 | 16.78 | 15.07 | 14.66 | 0.68 |
| 249.0718 | 87.92  | 17.93 | 19.89 | 19.83 | 19.39 | 1.45 |
| 249.1081 | 73.75  | 18.08 | 19.00 | 19.39 | 19.29 | 1.05 |
| 249.1461 | 148.99 | 14.78 | 13.51 | 14.51 | 14.47 | 0.47 |
| 249.1483 | 277    | 17.53 | 15.56 | 15.68 | 16.02 | 1.27 |
| 249.1540 | 57.39  | 22.03 | 23.31 | 22.41 | 22.21 | 0.87 |
| 249.1839 | 23.87  | 17.84 | 18.40 | 15.53 | 16.07 | 0.56 |
| 249.1847 | 297.2  | 17.90 | 16.94 | 17.21 | 17.05 | 0.62 |
| 249.2214 | 174.87 | 17.39 | 14.88 | 14.97 | 15.48 | 1.59 |
| 249.2575 | 23.6   | 16.58 | 11.44 | 12.30 | 12.31 | 1.68 |
| 249.2575 | 274.74 | 18.11 | 15.04 | 14.98 | 15.15 | 1.38 |
| 249.3949 | 97.61  | 10.56 | 16.65 | 16.34 | 15.44 | 1.82 |
| 249.5034 | 306.4  | 14.83 | 17.01 | 13.94 | 14.31 | 0.34 |
| 249.5051 | 86.25  | 11.96 | 17.95 | 18.87 | 16.74 | 1.40 |
| 249.8738 | 47.48  | 15.69 | 15.24 | 15.37 | 15.67 | 0.41 |
| 249.9007 | 34.33  | 15.93 | 16.21 | 16.04 | 16.62 | 0.28 |
| 249.9787 | 255.98 | 18.39 | 17.67 | 17.69 | 18.39 | 0.54 |
| 249.9789 | 127.43 | 17.83 | 17.77 | 18.53 | 18.34 | 0.19 |
| 250.0056 | 88.66  | 14.86 | 15.96 | 16.45 | 15.75 | 0.65 |
| 250.0471 | 86.61  | 16.28 | 16.61 | 17.19 | 17.28 | 0.67 |
| 250.0744 | 65.24  | 15.84 | 16.80 | 17.01 | 16.60 | 0.60 |
| 250.0856 | 62.51  | 16.66 | 15.02 | 14.47 | 13.99 | 0.71 |
| 250.0933 | 293.54 | 16.32 | 16.87 | 16.98 | 15.96 | 0.38 |
| 250.0936 | 93.16  | 18.94 | 20.81 | 20.90 | 20.46 | 1.55 |
| 250.1016 | 274.26 | 18.42 | 15.78 | 16.10 | 16.35 | 1.54 |
| 250.1112 | 39.93  | 13.69 | 16.21 | 14.74 | 17.32 | 0.78 |
| 250.1380 | 208.34 | 15.74 | 10.98 | 11.77 | 11.09 | 1.01 |
| 250.1439 | 197.79 | 16.14 | 11.09 | 12.85 | 12.44 | 1.27 |
| 250.1533 | 39.21  | 17.29 | 17.65 | 17.06 | 16.67 | 0.00 |
| 250.1801 | 212.71 | 16.10 | 10.33 | 11.43 | 12.35 | 1.30 |
| 250.4863 | 104.87 | 15.04 | 15.08 | 13.95 | 14.92 | 0.25 |
| 250.4981 | 267.73 | 15.94 | 19.65 | 19.60 | 17.85 | 1.40 |
| 250.5040 | 86.89  | 13.02 | 15.36 | 16.54 | 15.38 | 1.06 |
| 250.7787 | 46.57  | 16.55 | 15.80 | 15.75 | 15.62 | 1.00 |
| 250.8677 | 47.2   | 19.38 | 20.88 | 20.98 | 20.69 | 1.82 |
| 250.8803 | 111.54 | 17.33 | 17.06 | 17.12 | 17.90 | 0.05 |
| 250.8947 | 41.15  | 17.44 | 19.52 | 19.42 | 19.31 | 1.81 |
| 250.9133 | 42.59  | 18.85 | 20.20 | 20.28 | 20.75 | 1.11 |
| 250.9199 | 41.11  | 15.80 | 15.80 | 15.80 | 16.02 | 0.03 |
| 250.9373 | 20.22  | 16.83 | 16.13 | 16.46 | 16.78 | 0.35 |
| 250.9553 | 49.54  | 18.65 | 18.52 | 19.40 | 18.96 | 0.29 |
| 250.9627 | 265.47 | 18.45 | 19.85 | 20.18 | 19.33 | 0.77 |
| 250.9831 | 41.68  | 12.68 | 15.72 | 15.62 | 15.61 | 1.43 |
| 250.9913 | 158.51 | 14.36 | 13.64 | 12.96 | 12.69 | 0.61 |
| 250.9994 | 238.14 | 17.21 | 16.24 | 15.58 | 16.00 | 0.89 |
| 251.0366 | 69.14  | 22.41 | 22.78 | 22.82 | 23.05 | 0.37 |
| 251.0440 | 77.72  | 16.63 | 17.59 | 17.99 | 18.09 | 1.06 |
| 251.0696 | 70.07  | 19.43 | 20.07 | 20.22 | 19.95 | 0.47 |
| 251.0973 | 67.63  | 17.44 | 16.85 | 16.53 | 16.66 | 0.52 |
| 251.1140 | 213.42 | 16.37 | 14.02 | 13.12 | 13.44 | 0.90 |
| 251.1278 | 203.75 | 16.44 | 13.16 | 14.14 | 13.96 | 1.33 |
| 251.1330 | 29.05  | 19.03 | 16.33 | 18.98 | 17.62 | 0.73 |
| 251.1641 | 174.45 | 17.56 | 15.53 | 15.43 | 15.92 | 1.36 |
| 251.1853 | 173.97 | 16.87 | 15.55 | 15.57 | 16.08 | 1.08 |

|          |        |       |       |       |       |      |
|----------|--------|-------|-------|-------|-------|------|
| 251.2003 | 23.13  | 18.72 | 17.74 | 17.48 | 17.96 | 1.00 |
| 251.2003 | 286.6  | 20.28 | 20.04 | 19.78 | 20.19 | 0.16 |
| 251.2368 | 280.54 | 17.94 | 16.08 | 15.96 | 16.38 | 1.18 |
| 251.4940 | 98.09  | 15.40 | 14.84 | 14.29 | 14.31 | 0.60 |
| 251.5060 | 143.58 | 13.82 | 16.76 | 15.49 | 14.33 | 0.85 |
| 251.5176 | 295.25 | 15.03 | 17.83 | 17.82 | 16.17 | 1.46 |
| 251.5777 | 88.14  | 16.30 | 17.92 | 17.79 | 17.07 | 1.13 |
| 251.6337 | 27.58  | 15.85 | 18.30 | 17.38 | 18.15 | 1.57 |
| 251.8813 | 116.76 | 17.01 | 10.63 | 13.55 | 11.95 | 1.35 |
| 251.9165 | 41.52  | 14.92 | 13.92 | 14.72 | 15.14 | 0.26 |
| 251.9572 | 44.32  | 16.01 | 14.07 | 14.23 | 14.70 | 0.82 |
| 251.9672 | 35.92  | 13.38 | 17.93 | 17.81 | 17.39 | 1.81 |
| 251.9810 | 58.33  | 15.28 | 13.98 | 14.38 | 14.63 | 0.46 |
| 251.9883 | 33.45  | 15.06 | 11.79 | 17.25 | 14.78 | 0.28 |
| 251.9946 | 120.96 | 21.15 | 18.02 | 18.52 | 18.06 | 1.53 |
| 251.9951 | 209.12 | 17.28 | 15.38 | 15.15 | 16.18 | 1.18 |
| 252.0066 | 28.95  | 14.15 | 16.09 | 16.99 | 17.00 | 0.90 |
| 252.0160 | 264.26 | 16.82 | 19.29 | 20.09 | 18.34 | 1.60 |
| 252.0289 | 84.98  | 15.69 | 17.10 | 17.51 | 17.26 | 1.06 |
| 252.0406 | 75.86  | 17.90 | 19.19 | 18.92 | 19.18 | 1.07 |
| 252.0487 | 88.97  | 16.36 | 19.08 | 18.47 | 18.25 | 1.32 |
| 252.0726 | 300.9  | 13.56 | 16.65 | 16.69 | 15.35 | 1.33 |
| 252.0728 | 157.17 | 14.76 | 16.91 | 15.95 | 16.01 | 0.86 |
| 252.0730 | 66.32  | 19.08 | 19.87 | 19.99 | 19.41 | 0.57 |
| 252.0776 | 57.64  | 21.33 | 21.96 | 22.41 | 21.43 | 0.77 |
| 252.1080 | 94.64  | 18.86 | 19.42 | 19.59 | 19.09 | 0.94 |
| 252.1171 | 287.19 | 19.11 | 16.99 | 16.97 | 16.83 | 1.29 |
| 252.1230 | 223.74 | 16.61 | 11.86 | 12.74 | 12.58 | 1.15 |
| 252.1355 | 27.95  | 16.93 | 15.63 | 15.96 | 17.40 | 0.44 |
| 252.1440 | 294.73 | 16.63 | 17.05 | 17.28 | 16.51 | 0.44 |
| 252.1536 | 282.3  | 16.78 | 16.70 | 16.53 | 15.82 | 0.20 |
| 252.1593 | 22.26  | 16.39 | 12.40 | 13.81 | 12.99 | 1.16 |
| 252.1593 | 201.02 | 16.44 | 11.56 | 12.67 | 12.27 | 1.27 |
| 252.1631 | 76.18  | 15.94 | 17.13 | 17.17 | 16.91 | 1.14 |
| 252.2037 | 292.6  | 17.06 | 16.45 | 16.38 | 16.39 | 0.49 |
| 252.2322 | 205.82 | 16.27 | 12.56 | 12.52 | 13.48 | 1.10 |
| 252.5176 | 265.06 | 14.74 | 15.22 | 15.97 | 14.97 | 0.60 |
| 252.5295 | 86.03  | 14.98 | 14.86 | 15.34 | 15.14 | 0.06 |
| 252.6415 | 27.85  | 13.72 | 17.94 | 17.20 | 17.38 | 1.58 |
| 252.8657 | 47.41  | 16.28 | 17.43 | 17.51 | 17.30 | 1.38 |
| 252.8821 | 47.8   | 12.07 | 12.87 | 15.97 | 14.55 | 0.52 |
| 252.9113 | 42.35  | 16.13 | 17.40 | 17.49 | 18.23 | 0.86 |
| 252.9184 | 261.15 | 19.94 | 20.73 | 20.12 | 20.37 | 0.35 |
| 252.9507 | 36.74  | 21.80 | 24.78 | 24.48 | 24.02 | 1.88 |
| 252.9720 | 60.3   | 17.26 | 19.36 | 20.57 | 19.29 | 1.29 |
| 252.9965 | 68.23  | 17.39 | 12.27 | 16.36 | 19.23 | 0.78 |
| 252.9966 | 185.72 | 16.74 | 14.41 | 15.02 | 15.53 | 1.47 |
| 253.0083 | 268.3  | 15.79 | 16.76 | 17.13 | 16.80 | 0.67 |
| 253.0205 | 83.7   | 15.63 | 14.79 | 15.67 | 14.64 | 0.29 |
| 253.0316 | 67.61  | 18.91 | 19.07 | 18.99 | 19.56 | 0.19 |
| 253.0406 | 59.57  | 15.96 | 15.08 | 15.05 | 15.66 | 0.38 |
| 253.0480 | 42.32  | 12.80 | 15.71 | 13.06 | 14.99 | 0.52 |
| 253.0570 | 37.4   | 20.53 | 20.90 | 20.10 | 19.90 | 0.05 |
| 253.0793 | 67.33  | 18.04 | 18.42 | 18.89 | 17.83 | 0.51 |
| 253.1110 | 90.03  | 13.84 | 15.45 | 14.54 | 14.94 | 0.43 |
| 253.1182 | 201.6  | 17.43 | 14.64 | 14.64 | 15.27 | 1.66 |

|          |        |       |       |       |       |      |
|----------|--------|-------|-------|-------|-------|------|
| 253.1183 | 40.96  | 17.83 | 16.37 | 16.55 | 17.04 | 1.01 |
| 253.1295 | 68.69  | 16.50 | 14.56 | 15.13 | 13.31 | 0.60 |
| 253.1433 | 186.64 | 16.85 | 14.87 | 15.36 | 15.60 | 1.50 |
| 253.1799 | 174.65 | 17.55 | 15.45 | 15.41 | 15.79 | 1.44 |
| 253.2159 | 24.41  | 18.78 | 17.82 | 17.35 | 17.52 | 1.14 |
| 253.2161 | 275.93 | 20.96 | 20.33 | 20.29 | 20.61 | 0.39 |
| 253.2524 | 289.67 | 19.53 | 18.63 | 18.58 | 18.58 | 0.47 |
| 253.4350 | 301.56 | 16.53 | 16.15 | 14.98 | 16.98 | 0.42 |
| 253.5300 | 86.54  | 15.36 | 16.10 | 16.29 | 16.14 | 0.52 |
| 253.5462 | 94.89  | 16.78 | 15.41 | 15.75 | 15.49 | 0.64 |
| 253.5597 | 90.24  | 15.55 | 15.38 | 16.21 | 15.08 | 0.06 |
| 253.6312 | 27.74  | 17.23 | 20.25 | 19.61 | 19.84 | 1.56 |
| 253.9466 | 48.19  | 20.70 | 20.70 | 21.09 | 20.06 | 0.05 |
| 253.9545 | 38.94  | 17.80 | 20.65 | 20.43 | 19.82 | 1.85 |
| 253.9748 | 38.87  | 17.05 | 12.56 | 15.10 | 14.98 | 1.13 |
| 253.9910 | 88.83  | 16.43 | 16.82 | 17.87 | 16.75 | 0.56 |
| 253.9972 | 44.13  | 16.20 | 13.25 | 16.32 | 16.73 | 0.45 |
| 254.0085 | 303.75 | 11.75 | 14.33 | 11.34 | 10.34 | 0.31 |
| 254.0102 | 98.85  | 19.12 | 14.10 | 15.27 | 15.66 | 1.53 |
| 254.0191 | 87.64  | 20.22 | 21.92 | 21.66 | 21.36 | 1.35 |
| 254.0276 | 87.75  | 15.36 | 16.54 | 16.66 | 16.26 | 0.89 |
| 254.0616 | 44.69  | 16.32 | 18.13 | 15.72 | 15.77 | 0.25 |
| 254.0735 | 57.53  | 16.64 | 16.46 | 17.05 | 16.01 | 0.03 |
| 254.1331 | 164.53 | 18.84 | 15.92 | 16.11 | 16.59 | 1.69 |
| 254.1386 | 177.52 | 17.60 | 15.26 | 15.31 | 15.71 | 1.63 |
| 254.1611 | 57     | 15.63 | 14.72 | 14.78 | 14.75 | 0.43 |
| 254.1750 | 211.37 | 16.03 | 12.06 | 13.20 | 12.15 | 1.05 |
| 254.2194 | 280.26 | 17.56 | 16.50 | 16.14 | 16.27 | 0.91 |
| 254.2194 | 19.8   | 16.84 | 14.27 | 13.71 | 14.34 | 1.53 |
| 254.2476 | 22.05  | 16.60 | 13.60 | 13.93 | 14.37 | 1.90 |
| 254.2477 | 277.79 | 17.74 | 17.00 | 16.64 | 16.47 | 0.77 |
| 254.2560 | 177.8  | 17.35 | 14.36 | 14.53 | 15.03 | 1.65 |
| 254.5630 | 86.09  | 15.17 | 16.39 | 15.98 | 16.04 | 0.91 |
| 254.8146 | 47.31  | 21.38 | 22.64 | 22.69 | 22.15 | 1.22 |
| 254.8235 | 49.95  | 16.40 | 18.00 | 18.01 | 17.95 | 0.67 |
| 254.9147 | 21.46  | 16.34 | 10.61 | 11.19 | 11.71 | 2.00 |
| 254.9503 | 57.81  | 19.06 | 21.97 | 21.77 | 21.18 | 1.86 |
| 254.9725 | 63.8   | 16.80 | 12.58 | 14.83 | 15.88 | 1.21 |
| 254.9942 | 96.5   | 18.47 | 16.70 | 16.63 | 16.91 | 0.97 |
| 255.0115 | 307.95 | 14.43 | 14.53 | 13.86 | 13.54 | 0.23 |
| 255.0271 | 269.33 | 16.45 | 18.83 | 19.37 | 18.26 | 1.31 |
| 255.0389 | 85.45  | 15.52 | 16.46 | 16.49 | 16.23 | 0.95 |
| 255.0528 | 109.88 | 14.24 | 17.33 | 16.69 | 15.27 | 0.82 |
| 255.0647 | 159.48 | 17.84 | 19.78 | 19.57 | 19.98 | 1.02 |
| 255.0976 | 49.11  | 17.20 | 16.02 | 16.02 | 15.98 | 0.97 |
| 255.1008 | 110.96 | 14.84 | 14.49 | 14.12 | 14.12 | 0.54 |
| 255.1340 | 219.23 | 16.76 | 15.87 | 15.68 | 16.23 | 0.87 |
| 255.1452 | 60.88  | 18.25 | 18.20 | 18.13 | 18.03 | 0.10 |
| 255.1590 | 20.84  | 16.69 | 12.95 | 14.38 | 15.23 | 1.50 |
| 255.1592 | 198.65 | 17.57 | 15.37 | 15.08 | 15.44 | 1.47 |
| 255.1953 | 20.38  | 16.68 | 13.81 | 13.46 | 14.29 | 1.63 |
| 255.1956 | 174.81 | 17.77 | 15.65 | 15.37 | 16.15 | 1.39 |
| 255.2105 | 26.96  | 16.55 | 10.53 | 12.41 | 14.85 | 1.22 |
| 255.2316 | 24.35  | 19.26 | 18.05 | 17.11 | 18.18 | 1.20 |
| 255.2430 | 207.29 | 16.33 | 13.71 | 13.90 | 14.01 | 1.29 |
| 255.2683 | 198.78 | 16.52 | 13.83 | 14.37 | 14.67 | 1.12 |

|          |        |       |       |       |       |      |
|----------|--------|-------|-------|-------|-------|------|
| 255.5658 | 86.05  | 14.85 | 14.61 | 15.08 | 14.88 | 0.02 |
| 255.8190 | 46.45  | 15.35 | 14.41 | 14.51 | 14.61 | 0.73 |
| 255.9527 | 38.32  | 15.87 | 17.17 | 16.86 | 16.50 | 1.13 |
| 255.9789 | 25.74  | 17.47 | 19.46 | 16.79 | 16.05 | 0.27 |
| 256.0030 | 29.34  | 17.74 | 8.45  | 8.93  | 11.45 | 1.97 |
| 256.0068 | 126.64 | 17.03 | 17.36 | 15.65 | 15.95 | 0.27 |
| 256.0171 | 83.38  | 16.09 | 17.35 | 17.05 | 16.75 | 0.52 |
| 256.0303 | 83.49  | 15.69 | 16.95 | 18.16 | 18.12 | 1.24 |
| 256.0367 | 251.16 | 13.31 | 10.14 | 14.36 | 12.84 | 0.34 |
| 256.0455 | 258.57 | 16.39 | 17.21 | 16.09 | 15.13 | 0.06 |
| 256.0603 | 80.2   | 20.31 | 17.89 | 18.72 | 18.05 | 1.28 |
| 256.0679 | 151.97 | 12.27 | 14.63 | 14.81 | 15.51 | 1.11 |
| 256.1179 | 22.9   | 16.78 | 15.56 | 15.53 | 14.81 | 0.93 |
| 256.1181 | 172.6  | 17.19 | 14.56 | 14.64 | 15.22 | 1.61 |
| 256.1462 | 35.86  | 14.68 | 15.60 | 12.53 | 15.16 | 0.10 |
| 256.1543 | 266.62 | 17.88 | 15.94 | 15.67 | 16.13 | 1.41 |
| 256.1907 | 212.8  | 16.47 | 13.45 | 13.18 | 14.26 | 1.40 |
| 256.2350 | 292.58 | 18.06 | 17.01 | 16.90 | 17.27 | 0.73 |
| 256.2351 | 19.89  | 17.33 | 13.22 | 13.85 | 14.80 | 1.89 |
| 256.2634 | 174.13 | 21.12 | 20.42 | 18.70 | 20.28 | 0.61 |
| 256.5115 | 307.13 | 14.81 | 14.51 | 13.44 | 13.22 | 0.56 |
| 256.5401 | 84.75  | 15.02 | 16.37 | 16.27 | 15.79 | 0.96 |
| 256.5624 | 92.52  | 17.44 | 16.72 | 16.33 | 16.65 | 0.59 |
| 256.6511 | 77.3   | 15.16 | 16.69 | 16.93 | 15.38 | 0.90 |
| 256.8121 | 47.08  | 21.08 | 22.34 | 22.41 | 21.92 | 1.46 |
| 256.8206 | 49.61  | 18.16 | 18.86 | 18.56 | 18.98 | 0.42 |
| 256.8899 | 246.96 | 18.62 | 16.46 | 16.38 | 17.66 | 0.83 |
| 256.9118 | 111.29 | 12.80 | 13.74 | 14.98 | 14.18 | 0.68 |
| 256.9401 | 307.02 | 10.62 | 14.57 | 12.03 | 11.17 | 1.07 |
| 256.9737 | 44.2   | 16.31 | 18.06 | 19.40 | 18.42 | 1.52 |
| 256.9829 | 38.97  | 15.94 | 14.63 | 15.37 | 14.12 | 0.55 |
| 256.9920 | 196.59 | 13.38 | 18.68 | 19.08 | 16.18 | 1.56 |
| 257.0182 | 87.58  | 14.77 | 15.71 | 15.33 | 14.75 | 0.25 |
| 257.0536 | 45.81  | 15.80 | 15.81 | 16.39 | 15.99 | 0.19 |
| 257.0630 | 77.6   | 16.40 | 16.74 | 15.76 | 16.76 | 0.02 |
| 257.0767 | 220.32 | 16.51 | 19.28 | 20.14 | 18.97 | 1.49 |
| 257.0896 | 238.94 | 15.21 | 14.95 | 17.20 | 16.61 | 0.38 |
| 257.1131 | 277.31 | 17.45 | 15.46 | 15.38 | 15.75 | 1.20 |
| 257.1132 | 28.34  | 16.89 | 12.65 | 12.97 | 14.73 | 1.67 |
| 257.1133 | 181.37 | 18.02 | 15.29 | 15.09 | 15.77 | 1.57 |
| 257.1166 | 53.27  | 15.22 | 13.62 | 14.74 | 15.12 | 0.36 |
| 257.1246 | 73.01  | 18.30 | 18.68 | 18.84 | 18.37 | 0.38 |
| 257.1383 | 229.61 | 16.38 | 13.11 | 13.34 | 13.37 | 1.03 |
| 257.1472 | 50.21  | 20.34 | 21.59 | 21.21 | 21.68 | 0.83 |
| 257.1749 | 177.82 | 16.87 | 14.28 | 14.40 | 14.98 | 1.29 |
| 257.1896 | 24.52  | 16.87 | 12.29 | 14.27 | 15.95 | 1.35 |
| 257.2111 | 178.23 | 16.68 | 14.04 | 14.30 | 15.12 | 1.39 |
| 257.2261 | 24.73  | 17.55 | 12.04 | 13.33 | 14.56 | 1.67 |
| 257.2473 | 22.44  | 19.06 | 15.33 | 16.18 | 16.37 | 1.84 |
| 257.2474 | 293.69 | 18.68 | 17.20 | 17.34 | 17.05 | 0.93 |
| 257.2667 | 294.75 | 18.18 | 18.02 | 17.96 | 17.60 | 0.14 |
| 257.5377 | 91.34  | 18.87 | 14.63 | 15.90 | 14.89 | 1.35 |
| 257.5728 | 78.8   | 16.76 | 18.46 | 17.92 | 17.92 | 1.12 |
| 257.6338 | 27.87  | 15.43 | 17.89 | 17.07 | 17.65 | 1.57 |
| 257.9240 | 248.74 | 16.34 | 14.77 | 14.88 | 15.40 | 0.55 |
| 257.9241 | 127.76 | 15.46 | 16.59 | 17.99 | 16.57 | 0.57 |

|          |        |       |       |       |       |      |
|----------|--------|-------|-------|-------|-------|------|
| 257.9485 | 22.41  | 15.70 | 13.73 | 14.81 | 14.49 | 0.60 |
| 257.9948 | 68.45  | 21.07 | 19.80 | 20.06 | 20.06 | 1.47 |
| 258.0060 | 73.91  | 16.37 | 11.26 | 12.03 | 12.15 | 1.21 |
| 258.0608 | 52.97  | 17.02 | 18.74 | 19.19 | 18.59 | 0.78 |
| 258.0972 | 111.3  | 18.92 | 9.94  | 9.96  | 11.39 | 1.91 |
| 258.1089 | 277.6  | 21.37 | 27.31 | 21.91 | 25.76 | 0.72 |
| 258.1696 | 218.87 | 18.56 | 14.29 | 15.00 | 15.83 | 1.51 |
| 258.2609 | 82.9   | 15.79 | 14.63 | 15.34 | 14.54 | 0.51 |
| 258.2790 | 22.81  | 17.70 | 16.98 | 17.13 | 17.85 | 0.49 |
| 258.5044 | 30.84  | 14.55 | 11.33 | 16.48 | 13.77 | 0.35 |
| 258.6232 | 27.55  | 15.76 | 19.32 | 18.00 | 18.82 | 1.63 |
| 258.6415 | 28.52  | 17.26 | 21.84 | 20.94 | 20.93 | 1.82 |
| 258.6501 | 27.04  | 14.55 | 12.66 | 17.96 | 15.20 | 0.13 |
| 258.8103 | 46.1   | 19.31 | 20.29 | 20.40 | 19.90 | 1.36 |
| 258.8176 | 49.32  | 17.18 | 17.38 | 17.23 | 17.57 | 0.12 |
| 258.8992 | 48.39  | 20.33 | 20.40 | 20.66 | 20.52 | 0.34 |
| 258.9437 | 25.27  | 16.23 | 18.04 | 19.86 | 18.89 | 1.51 |
| 258.9583 | 50.98  | 17.55 | 17.78 | 19.03 | 17.55 | 0.51 |
| 258.9800 | 49.8   | 14.43 | 16.99 | 18.48 | 17.57 | 1.35 |
| 258.9898 | 46.49  | 21.37 | 20.66 | 20.53 | 19.93 | 0.72 |
| 258.9975 | 49.02  | 17.39 | 14.92 | 16.33 | 15.78 | 1.23 |
| 259.0210 | 295.84 | 11.28 | 16.82 | 16.72 | 13.70 | 1.50 |
| 259.0386 | 100.49 | 17.70 | 9.80  | 8.74  | 8.98  | 1.67 |
| 259.0586 | 73.73  | 18.41 | 18.99 | 19.56 | 18.76 | 0.73 |
| 259.0658 | 85.51  | 15.27 | 16.08 | 14.64 | 15.45 | 0.08 |
| 259.0924 | 78.74  | 17.39 | 17.65 | 17.66 | 18.47 | 0.20 |
| 259.1003 | 24.14  | 15.86 | 13.91 | 10.73 | 15.83 | 0.84 |
| 259.1070 | 272.95 | 14.10 | 18.56 | 17.46 | 17.08 | 1.11 |
| 259.1131 | 281.59 | 19.10 | 23.81 | 19.07 | 22.22 | 0.63 |
| 259.1131 | 89.54  | 26.76 | 26.65 | 26.90 | 26.62 | 0.02 |
| 259.1285 | 287.62 | 21.32 | 20.54 | 20.12 | 20.33 | 0.46 |
| 259.1420 | 42.83  | 16.76 | 19.77 | 18.86 | 19.28 | 1.68 |
| 259.1513 | 43.2   | 13.53 | 13.20 | 15.15 | 14.17 | 0.15 |
| 259.1695 | 213.93 | 15.87 | 10.44 | 10.52 | 12.02 | 1.27 |
| 259.1728 | 24.23  | 15.90 | 15.33 | 14.04 | 14.92 | 0.57 |
| 259.1902 | 293.57 | 18.83 | 17.90 | 17.92 | 17.80 | 0.59 |
| 259.2054 | 23.86  | 17.08 | 14.15 | 14.99 | 15.79 | 1.58 |
| 259.2056 | 176.58 | 17.32 | 14.88 | 15.09 | 15.87 | 1.45 |
| 259.2418 | 24.4   | 16.70 | 10.45 | 12.62 | 12.82 | 1.47 |
| 259.2823 | 22.48  | 14.46 | 13.04 | 13.07 | 13.96 | 0.52 |
| 259.3451 | 84.22  | 16.47 | 15.98 | 16.09 | 15.56 | 0.32 |
| 259.5662 | 93.79  | 18.66 | 19.69 | 19.19 | 18.86 | 0.48 |
| 259.5796 | 94.91  | 15.67 | 17.04 | 17.73 | 16.23 | 1.08 |
| 259.6312 | 27.37  | 16.98 | 20.05 | 19.14 | 19.44 | 1.39 |
| 259.6493 | 29.98  | 16.82 | 19.99 | 19.12 | 19.51 | 1.50 |
| 259.6580 | 38.32  | 16.38 | 17.78 | 18.94 | 17.64 | 1.29 |
| 259.8925 | 47.55  | 20.46 | 19.73 | 20.20 | 19.36 | 0.52 |
| 259.9013 | 38.2   | 14.69 | 13.95 | 14.57 | 14.85 | 0.16 |
| 259.9569 | 94.39  | 19.07 | 24.03 | 24.32 | 22.66 | 1.38 |
| 259.9933 | 58.07  | 18.64 | 15.94 | 16.09 | 16.43 | 1.64 |
| 260.0110 | 103.19 | 14.54 | 13.38 | 11.67 | 13.70 | 0.56 |
| 260.0171 | 89.38  | 15.67 | 14.38 | 16.25 | 15.54 | 0.25 |
| 260.0271 | 88.25  | 17.58 | 17.35 | 16.71 | 17.33 | 0.36 |
| 260.0441 | 93.32  | 20.01 | 17.47 | 18.27 | 18.08 | 1.49 |
| 260.0528 | 253.54 | 15.55 | 17.51 | 17.64 | 17.56 | 1.14 |
| 260.0530 | 47.73  | 18.69 | 17.26 | 17.27 | 17.94 | 1.41 |

|          |        |       |       |       |       |      |
|----------|--------|-------|-------|-------|-------|------|
| 260.0756 | 69.27  | 17.68 | 19.04 | 18.89 | 18.71 | 1.08 |
| 260.0956 | 24.52  | 11.23 | 13.24 | 10.38 | 16.62 | 0.37 |
| 260.1135 | 284.25 | 19.19 | 20.71 | 17.18 | 19.44 | 0.00 |
| 260.1235 | 53.68  | 15.53 | 14.70 | 16.18 | 14.58 | 0.14 |
| 260.1320 | 277.34 | 18.98 | 16.33 | 16.07 | 16.39 | 1.54 |
| 260.1320 | 153.79 | 19.01 | 15.86 | 16.23 | 16.56 | 1.75 |
| 260.1491 | 208.2  | 16.35 | 9.10  | 11.28 | 12.22 | 1.58 |
| 260.1505 | 28.18  | 16.19 | 17.71 | 16.79 | 17.06 | 0.61 |
| 260.1599 | 47.1   | 17.21 | 17.58 | 17.60 | 16.63 | 0.14 |
| 260.1701 | 48.22  | 17.10 | 18.55 | 18.27 | 18.23 | 1.03 |
| 260.1855 | 26.65  | 21.55 | 21.68 | 22.06 | 21.58 | 0.27 |
| 260.1967 | 59.36  | 18.58 | 19.81 | 19.85 | 19.42 | 1.35 |
| 260.4814 | 68.96  | 16.08 | 18.15 | 18.45 | 17.44 | 1.31 |
| 260.5619 | 226.25 | 13.37 | 15.77 | 16.13 | 15.71 | 1.26 |
| 260.5759 | 260.4  | 11.92 | 13.58 | 15.45 | 13.09 | 0.80 |
| 260.5760 | 157.31 | 16.55 | 13.78 | 14.58 | 14.04 | 1.46 |
| 260.5828 | 70.93  | 18.16 | 17.66 | 17.96 | 17.71 | 0.19 |
| 260.6389 | 29.68  | 16.61 | 20.31 | 19.50 | 19.81 | 1.65 |
| 260.6572 | 27.42  | 16.59 | 20.29 | 19.57 | 19.73 | 1.69 |
| 260.7207 | 282.02 | 15.20 | 18.40 | 19.73 | 17.98 | 1.68 |
| 260.7607 | 44.94  | 22.15 | 21.17 | 21.18 | 20.75 | 0.74 |
| 260.8081 | 46.37  | 16.03 | 16.85 | 16.97 | 16.69 | 1.39 |
| 260.8154 | 60.76  | 16.24 | 16.99 | 16.95 | 16.47 | 0.45 |
| 260.8704 | 101.85 | 12.09 | 13.12 | 10.04 | 14.19 | 0.01 |
| 260.8972 | 47.34  | 17.41 | 17.64 | 17.96 | 17.84 | 0.58 |
| 260.9302 | 48.97  | 14.50 | 14.34 | 15.13 | 15.11 | 0.12 |
| 260.9337 | 32.47  | 14.57 | 13.74 | 15.44 | 14.77 | 0.03 |
| 260.9488 | 48.87  | 15.20 | 17.47 | 17.76 | 17.49 | 1.52 |
| 260.9576 | 88     | 16.70 | 20.80 | 21.21 | 19.88 | 1.58 |
| 260.9910 | 62.83  | 19.35 | 19.12 | 20.10 | 19.11 | 0.16 |
| 260.9972 | 86.09  | 15.79 | 15.91 | 16.18 | 16.51 | 0.25 |
| 261.0084 | 89.19  | 15.59 | 13.37 | 15.37 | 16.19 | 0.53 |
| 261.0144 | 97.38  | 19.03 | 19.36 | 18.88 | 18.95 | 0.04 |
| 261.0370 | 282.14 | 20.55 | 22.33 | 22.46 | 21.71 | 1.28 |
| 261.0371 | 85.61  | 15.46 | 16.42 | 16.67 | 15.29 | 0.42 |
| 261.0479 | 80.64  | 17.06 | 14.16 | 14.32 | 15.14 | 1.08 |
| 261.0540 | 237.99 | 16.45 | 18.88 | 19.60 | 18.36 | 1.41 |
| 261.1173 | 95.82  | 20.10 | 20.15 | 20.43 | 19.77 | 0.14 |
| 261.1306 | 150.58 | 16.52 | 14.90 | 15.26 | 15.22 | 0.95 |
| 261.1347 | 28.13  | 15.80 | 19.30 | 19.42 | 15.54 | 1.01 |
| 261.1443 | 46.24  | 20.14 | 20.45 | 20.67 | 20.50 | 0.62 |
| 261.1556 | 79.79  | 16.29 | 17.36 | 17.50 | 17.01 | 0.82 |
| 261.1716 | 26.44  | 17.54 | 18.84 | 18.06 | 18.02 | 0.77 |
| 261.1848 | 182.87 | 16.77 | 13.91 | 14.61 | 14.58 | 1.36 |
| 261.1880 | 25.17  | 18.80 | 18.14 | 18.77 | 18.35 | 0.41 |
| 261.2002 | 56.97  | 15.46 | 15.82 | 15.60 | 15.77 | 0.29 |
| 261.2210 | 23.65  | 17.12 | 14.59 | 14.88 | 15.96 | 1.63 |
| 261.2210 | 292.07 | 18.21 | 17.08 | 16.98 | 16.83 | 0.82 |
| 261.3861 | 283.88 | 12.92 | 15.46 | 16.12 | 14.60 | 1.31 |
| 261.4906 | 306.9  | 15.15 | 16.16 | 15.05 | 14.82 | 0.34 |
| 261.5183 | 91.18  | 15.44 | 14.96 | 15.74 | 15.52 | 0.08 |
| 261.5354 | 231.4  | 16.04 | 17.41 | 18.90 | 16.95 | 0.88 |
| 261.5558 | 229.53 | 13.08 | 15.79 | 16.10 | 15.32 | 1.42 |
| 261.8893 | 46.38  | 19.43 | 18.32 | 18.80 | 17.98 | 0.79 |
| 261.9100 | 268.18 | 19.35 | 14.01 | 13.78 | 15.46 | 1.37 |
| 261.9281 | 61.19  | 17.20 | 15.41 | 17.24 | 15.75 | 0.63 |

|          |        |       |       |       |       |      |
|----------|--------|-------|-------|-------|-------|------|
| 261.9454 | 297.32 | 14.63 | 16.12 | 14.62 | 13.66 | 0.23 |
| 261.9456 | 100.79 | 19.14 | 22.16 | 21.61 | 21.04 | 1.40 |
| 261.9542 | 88.87  | 15.90 | 21.03 | 21.34 | 19.94 | 1.52 |
| 261.9613 | 79.5   | 16.28 | 17.63 | 17.94 | 17.05 | 1.01 |
| 261.9725 | 94.53  | 16.85 | 21.02 | 21.54 | 20.12 | 1.66 |
| 262.0401 | 297.51 | 15.57 | 17.60 | 17.70 | 16.55 | 1.19 |
| 262.0524 | 85.69  | 16.17 | 16.77 | 16.69 | 16.98 | 0.42 |
| 262.0856 | 227.22 | 14.12 | 17.05 | 17.28 | 16.61 | 1.69 |
| 262.0908 | 48.99  | 16.01 | 14.29 | 15.54 | 15.43 | 0.48 |
| 262.1031 | 94.64  | 19.16 | 20.21 | 20.39 | 20.51 | 1.10 |
| 262.1110 | 27.36  | 13.72 | 14.75 | 13.46 | 16.54 | 0.24 |
| 262.1285 | 119.88 | 15.80 | 16.20 | 15.06 | 17.00 | 0.06 |
| 262.1380 | 27.44  | 15.59 | 14.67 | 15.12 | 11.86 | 0.37 |
| 262.1394 | 289.67 | 17.53 | 15.49 | 15.68 | 15.90 | 1.31 |
| 262.1436 | 166.27 | 17.51 | 15.26 | 14.51 | 15.60 | 1.56 |
| 262.1497 | 59.01  | 15.32 | 18.42 | 18.17 | 18.53 | 1.21 |
| 262.1647 | 46.38  | 22.60 | 23.21 | 23.24 | 22.69 | 0.91 |
| 262.1801 | 208.14 | 15.51 | 11.30 | 11.91 | 13.13 | 1.09 |
| 262.5347 | 89.42  | 13.88 | 14.58 | 14.21 | 14.65 | 0.22 |
| 262.5515 | 74.61  | 17.68 | 16.73 | 16.96 | 16.75 | 0.64 |
| 262.5650 | 88.79  | 14.65 | 15.53 | 15.78 | 14.75 | 0.50 |
| 262.6225 | 31.87  | 15.90 | 17.62 | 17.83 | 17.46 | 1.34 |
| 262.6349 | 26.99  | 15.96 | 15.44 | 16.69 | 15.66 | 0.01 |
| 262.7580 | 44.88  | 22.43 | 21.45 | 21.44 | 21.06 | 0.72 |
| 262.9068 | 112.47 | 13.49 | 14.28 | 11.64 | 14.33 | 0.06 |
| 262.9458 | 48.98  | 15.14 | 15.00 | 15.08 | 15.65 | 0.01 |
| 262.9732 | 92.97  | 15.71 | 17.37 | 17.70 | 16.37 | 1.05 |
| 263.0025 | 56.89  | 17.47 | 13.44 | 16.22 | 13.41 | 0.95 |
| 263.0151 | 254.31 | 15.73 | 16.49 | 19.31 | 17.00 | 0.81 |
| 263.0237 | 79.73  | 15.41 | 17.69 | 18.16 | 17.18 | 1.25 |
| 263.0309 | 168.63 | 15.16 | 15.43 | 14.79 | 15.41 | 0.02 |
| 263.0339 | 27.85  | 15.13 | 14.61 | 14.10 | 16.64 | 0.18 |
| 263.0409 | 304.25 | 13.34 | 14.58 | 14.63 | 13.90 | 0.69 |
| 263.0606 | 107.2  | 17.33 | 18.10 | 18.02 | 17.72 | 0.53 |
| 263.0729 | 53.13  | 18.90 | 18.81 | 18.70 | 18.40 | 0.30 |
| 263.0752 | 145.7  | 10.12 | 14.33 | 12.37 | 13.29 | 1.16 |
| 263.0872 | 81.5   | 17.86 | 18.73 | 19.06 | 18.64 | 0.95 |
| 263.0952 | 24.61  | 15.54 | 15.28 | 13.84 | 16.98 | 0.29 |
| 263.1068 | 88.28  | 14.71 | 16.32 | 15.65 | 16.25 | 0.56 |
| 263.1241 | 153.56 | 13.02 | 13.80 | 14.28 | 13.73 | 0.45 |
| 263.1317 | 34.24  | 15.82 | 17.19 | 17.13 | 17.23 | 0.67 |
| 263.1461 | 56.97  | 17.04 | 17.36 | 17.10 | 17.75 | 0.18 |
| 263.1642 | 22.8   | 16.77 | 13.97 | 14.15 | 14.47 | 1.45 |
| 263.1644 | 178.86 | 17.15 | 14.67 | 14.71 | 15.36 | 1.59 |
| 263.1681 | 30.51  | 19.45 | 19.81 | 19.88 | 19.22 | 0.43 |
| 263.2002 | 24.46  | 20.14 | 18.40 | 19.22 | 20.06 | 0.82 |
| 263.2004 | 152.5  | 18.01 | 16.48 | 16.49 | 17.14 | 1.26 |
| 263.2328 | 26.83  | 15.53 | 17.42 | 16.95 | 16.05 | 0.85 |
| 263.2367 | 278.12 | 21.57 | 21.03 | 20.80 | 20.91 | 0.34 |
| 263.2367 | 153.66 | 20.89 | 19.47 | 19.17 | 19.42 | 0.73 |
| 263.5242 | 252.96 | 13.84 | 14.60 | 15.41 | 14.27 | 0.62 |
| 263.5247 | 83.4   | 11.91 | 15.25 | 15.65 | 14.46 | 1.34 |
| 263.5415 | 150.65 | 14.60 | 15.01 | 15.03 | 13.67 | 0.07 |
| 263.5544 | 71.35  | 16.83 | 15.39 | 15.77 | 15.34 | 0.59 |
| 263.6828 | 22.59  | 13.62 | 14.87 | 13.35 | 14.60 | 0.26 |
| 263.8883 | 37.76  | 16.51 | 14.38 | 14.78 | 14.41 | 0.68 |

|          |        |       |       |       |       |      |
|----------|--------|-------|-------|-------|-------|------|
| 263.9420 | 110.87 | 15.96 | 16.69 | 16.03 | 16.12 | 0.20 |
| 263.9562 | 303.03 | 13.77 | 12.39 | 10.76 | 14.98 | 0.52 |
| 263.9703 | 92.72  | 15.44 | 17.58 | 18.09 | 16.62 | 1.28 |
| 263.9786 | 85.47  | 15.75 | 20.51 | 20.59 | 19.21 | 1.84 |
| 264.0218 | 141.13 | 13.69 | 15.63 | 14.81 | 13.73 | 0.49 |
| 264.0342 | 272    | 21.07 | 22.32 | 21.77 | 20.73 | 0.53 |
| 264.0393 | 270.4  | 18.44 | 21.61 | 20.35 | 19.59 | 1.22 |
| 264.0766 | 129.8  | 16.71 | 17.01 | 17.21 | 15.43 | 0.08 |
| 264.0901 | 57.23  | 14.62 | 15.15 | 16.84 | 15.84 | 0.61 |
| 264.1013 | 58.23  | 15.26 | 14.17 | 14.19 | 14.76 | 0.52 |
| 264.1076 | 103.35 | 16.53 | 14.96 | 14.63 | 15.46 | 1.37 |
| 264.1170 | 292.03 | 18.74 | 17.03 | 17.05 | 17.07 | 1.08 |
| 264.1268 | 24.67  | 13.61 | 16.78 | 14.25 | 17.15 | 0.79 |
| 264.1594 | 204.9  | 16.08 | 11.91 | 12.99 | 12.86 | 1.17 |
| 264.1958 | 151.45 | 17.58 | 15.62 | 15.78 | 16.39 | 1.42 |
| 264.2036 | 24.51  | 17.55 | 14.14 | 15.81 | 17.13 | 0.89 |
| 264.2400 | 23.52  | 18.42 | 16.91 | 16.85 | 17.80 | 1.11 |
| 264.2401 | 289.42 | 19.01 | 17.18 | 17.26 | 16.84 | 1.07 |
| 264.2403 | 172.02 | 18.70 | 16.92 | 16.65 | 17.49 | 1.20 |
| 264.5359 | 264.68 | 18.44 | 19.07 | 18.53 | 17.75 | 0.17 |
| 264.5740 | 84.31  | 15.05 | 15.18 | 15.35 | 15.97 | 0.22 |
| 264.5776 | 137.26 | 15.53 | 14.15 | 14.06 | 13.16 | 0.77 |
| 264.7551 | 45     | 21.29 | 20.27 | 20.24 | 19.79 | 0.79 |
| 264.8444 | 45.91  | 21.31 | 22.79 | 22.88 | 22.58 | 1.58 |
| 264.8523 | 48.64  | 16.94 | 17.35 | 17.23 | 17.70 | 0.26 |
| 264.9430 | 300.96 | 16.48 | 15.90 | 14.90 | 16.30 | 0.50 |
| 264.9625 | 87.47  | 14.77 | 16.22 | 16.11 | 15.56 | 0.79 |
| 264.9797 | 88.6   | 14.76 | 16.81 | 16.31 | 15.79 | 1.16 |
| 264.9991 | 42.19  | 15.62 | 15.18 | 15.31 | 15.51 | 0.19 |
| 265.0227 | 80.07  | 21.20 | 17.24 | 19.15 | 19.08 | 1.48 |
| 265.0344 | 45.59  | 17.68 | 17.18 | 17.90 | 17.76 | 0.11 |
| 265.0351 | 255.64 | 15.73 | 15.45 | 14.83 | 14.44 | 0.42 |
| 265.0428 | 257.95 | 14.79 | 15.82 | 15.13 | 14.14 | 0.35 |
| 265.0595 | 61.86  | 15.79 | 15.28 | 15.53 | 15.30 | 0.19 |
| 265.0678 | 86.56  | 16.38 | 19.31 | 19.37 | 18.35 | 1.78 |
| 265.0791 | 91.71  | 17.08 | 18.14 | 17.93 | 18.12 | 0.86 |
| 265.1117 | 48.24  | 20.71 | 20.12 | 19.97 | 20.67 | 0.77 |
| 265.1433 | 211.89 | 16.49 | 12.33 | 13.77 | 13.14 | 1.25 |
| 265.1544 | 27.1   | 16.54 | 15.73 | 16.67 | 16.34 | 0.17 |
| 265.1796 | 291.01 | 17.69 | 16.83 | 16.87 | 16.77 | 0.74 |
| 265.2160 | 288.57 | 18.25 | 16.87 | 16.87 | 16.81 | 0.94 |
| 265.2522 | 23.86  | 20.35 | 19.42 | 19.02 | 20.02 | 0.92 |
| 265.2523 | 277.83 | 21.03 | 20.97 | 20.75 | 21.22 | 0.06 |
| 265.4826 | 111.57 | 16.43 | 11.63 | 15.03 | 11.90 | 0.81 |
| 265.5615 | 72.01  | 18.90 | 20.05 | 20.13 | 19.82 | 0.78 |
| 265.5689 | 100.56 | 15.03 | 15.08 | 14.65 | 14.77 | 0.09 |
| 265.5750 | 90.51  | 15.53 | 14.98 | 15.44 | 14.39 | 0.25 |
| 265.6198 | 29.65  | 17.67 | 13.01 | 13.42 | 13.77 | 2.01 |
| 265.6312 | 27.53  | 16.13 | 18.18 | 17.46 | 17.87 | 1.32 |
| 265.8478 | 46.14  | 15.96 | 16.59 | 16.77 | 16.56 | 0.98 |
| 265.9747 | 73.73  | 16.11 | 16.89 | 17.15 | 16.24 | 0.46 |
| 266.0264 | 82.67  | 17.52 | 11.91 | 12.68 | 13.26 | 1.63 |
| 266.0307 | 248.89 | 16.16 | 16.15 | 17.05 | 16.07 | 0.27 |
| 266.0426 | 234.3  | 10.34 | 15.04 | 14.35 | 13.48 | 1.22 |
| 266.0537 | 42.83  | 17.58 | 17.12 | 16.47 | 16.68 | 0.48 |
| 266.0634 | 65.5   | 16.14 | 15.98 | 16.52 | 16.24 | 0.05 |



|          |        |       |       |       |       |      |
|----------|--------|-------|-------|-------|-------|------|
| 266.0747 | 48.26  | 22.22 | 21.16 | 21.58 | 21.62 | 0.93 |
| 266.1150 | 48.21  | 17.40 | 16.04 | 15.77 | 16.94 | 0.99 |
| 266.1232 | 86.67  | 19.92 | 19.75 | 19.82 | 19.74 | 0.22 |
| 266.1328 | 171.11 | 18.21 | 14.62 | 14.74 | 15.52 | 1.79 |
| 266.1386 | 33.55  | 19.00 | 19.61 | 18.88 | 18.14 | 0.10 |
| 266.1599 | 56.28  | 17.17 | 16.25 | 16.50 | 16.70 | 0.78 |
| 266.1749 | 211.73 | 16.00 | 10.80 | 11.63 | 11.98 | 1.27 |
| 266.2556 | 23.41  | 18.08 | 16.03 | 15.84 | 17.25 | 1.30 |
| 266.2557 | 290.09 | 18.62 | 17.13 | 16.92 | 17.23 | 0.94 |
| 266.4838 | 304.52 | 14.84 | 15.85 | 15.11 | 13.32 | 0.20 |
| 266.5631 | 66.21  | 17.88 | 17.74 | 18.59 | 17.74 | 0.09 |
| 266.6277 | 30.2   | 17.85 | 13.85 | 14.16 | 14.41 | 2.01 |
| 266.6391 | 31.02  | 19.48 | 23.49 | 22.65 | 23.13 | 1.85 |
| 266.7527 | 45.05  | 19.30 | 17.87 | 17.84 | 17.71 | 1.11 |
| 266.8418 | 46.05  | 20.25 | 21.74 | 21.87 | 21.53 | 1.60 |
| 266.8493 | 48.61  | 15.81 | 17.62 | 17.62 | 17.50 | 0.86 |
| 266.8888 | 262.27 | 18.44 | 12.34 | 11.87 | 13.73 | 1.35 |
| 266.8938 | 48.25  | 16.03 | 16.20 | 16.54 | 16.17 | 0.25 |
| 266.9084 | 42.88  | 16.69 | 17.17 | 16.63 | 17.90 | 0.38 |
| 266.9285 | 30.14  | 18.54 | 18.63 | 19.38 | 19.10 | 0.43 |
| 266.9671 | 285.2  | 10.70 | 14.72 | 15.06 | 14.65 | 0.98 |
| 266.9688 | 164.64 | 13.55 | 15.47 | 14.73 | 14.08 | 0.54 |
| 266.9927 | 36.67  | 14.34 | 11.04 | 15.40 | 12.58 | 0.55 |
| 267.0225 | 88.02  | 14.38 | 16.20 | 17.29 | 16.21 | 0.89 |
| 267.0412 | 92.6   | 15.35 | 20.15 | 19.31 | 19.10 | 1.63 |
| 267.0540 | 230.66 | 15.48 | 19.57 | 20.22 | 17.93 | 1.30 |
| 267.0663 | 87.85  | 17.14 | 15.78 | 16.12 | 15.95 | 0.99 |
| 267.0779 | 48.71  | 18.70 | 16.90 | 17.42 | 17.49 | 1.19 |
| 267.1101 | 54.35  | 16.60 | 15.73 | 15.45 | 16.44 | 0.63 |
| 267.1268 | 81.09  | 16.63 | 15.08 | 14.27 | 16.05 | 0.54 |
| 267.1341 | 37.65  | 18.21 | 17.93 | 17.92 | 17.22 | 0.43 |
| 267.1409 | 27.77  | 17.69 | 21.45 | 20.66 | 21.15 | 1.82 |
| 267.1590 | 176.07 | 16.68 | 13.36 | 13.67 | 14.53 | 1.23 |
| 267.1953 | 20.32  | 18.31 | 16.07 | 16.19 | 16.55 | 1.64 |
| 267.1954 | 153.28 | 19.15 | 18.60 | 18.88 | 18.83 | 0.33 |
| 267.2105 | 24     | 18.18 | 14.76 | 16.35 | 17.23 | 1.32 |
| 267.2316 | 293.09 | 17.92 | 16.90 | 16.83 | 16.70 | 0.85 |
| 267.2679 | 287.35 | 19.81 | 17.94 | 18.05 | 17.84 | 0.93 |
| 267.2680 | 23.69  | 18.13 | 14.25 | 15.14 | 15.42 | 1.85 |
| 267.5554 | 228.85 | 15.03 | 15.98 | 16.29 | 16.15 | 0.63 |
| 267.5684 | 93.18  | 18.97 | 18.20 | 18.56 | 17.93 | 0.51 |
| 267.6172 | 25.4   | 17.15 | 12.10 | 12.59 | 12.95 | 2.01 |
| 267.6468 | 30.23  | 22.30 | 27.09 | 26.21 | 26.27 | 1.79 |
| 267.8452 | 46.15  | 15.18 | 14.63 | 14.39 | 15.06 | 0.50 |
| 267.8829 | 309.38 | 11.74 | 13.29 | 10.27 | 11.85 | 0.09 |
| 267.9283 | 22.72  | 15.04 | 13.40 | 13.81 | 14.50 | 0.61 |
| 267.9541 | 58.62  | 16.14 | 14.52 | 15.34 | 15.00 | 0.77 |
| 267.9622 | 89.89  | 15.40 | 14.72 | 16.34 | 15.73 | 0.05 |
| 267.9667 | 90.99  | 19.38 | 12.93 | 12.46 | 15.71 | 1.81 |
| 268.0068 | 80.39  | 16.79 | 16.86 | 17.53 | 16.31 | 0.16 |
| 268.0258 | 280.94 | 16.16 | 16.78 | 15.70 | 15.75 | 0.03 |
| 268.0517 | 60.52  | 21.36 | 21.78 | 22.61 | 21.56 | 0.84 |
| 268.0562 | 81.25  | 11.37 | 13.09 | 14.29 | 13.32 | 0.78 |
| 268.0578 | 280.4  | 14.86 | 16.89 | 17.10 | 16.41 | 1.43 |
| 268.0699 | 61.44  | 17.70 | 18.16 | 18.79 | 18.48 | 0.47 |
| 268.0853 | 146.52 | 13.93 | 12.51 | 13.44 | 14.26 | 0.33 |

|          |        |       |       |       |       |      |
|----------|--------|-------|-------|-------|-------|------|
| 268.1039 | 64.59  | 25.19 | 26.58 | 26.60 | 25.59 | 0.58 |
| 268.1403 | 37.99  | 18.93 | 13.06 | 12.98 | 14.80 | 1.69 |
| 268.1485 | 32.39  | 20.49 | 25.20 | 24.29 | 24.34 | 1.78 |
| 268.1542 | 209.59 | 16.02 | 9.76  | 10.13 | 11.63 | 1.46 |
| 268.1988 | 180.75 | 16.96 | 12.92 | 13.42 | 14.62 | 1.49 |
| 268.2271 | 204.67 | 16.45 | 12.34 | 12.63 | 12.87 | 1.25 |
| 268.2634 | 22.2   | 15.64 | 12.67 | 12.85 | 13.51 | 1.27 |
| 268.2635 | 190.74 | 16.25 | 14.20 | 14.01 | 13.66 | 1.07 |
| 268.2712 | 24.46  | 16.49 | 8.04  | 8.63  | 8.99  | 1.80 |
| 268.5715 | 71.42  | 19.92 | 21.18 | 21.72 | 21.13 | 0.75 |
| 268.6448 | 27.65  | 16.27 | 18.88 | 17.97 | 18.39 | 1.60 |
| 268.6500 | 28.08  | 17.60 | 22.48 | 21.55 | 21.50 | 1.82 |
| 268.6575 | 55.82  | 18.39 | 19.14 | 19.61 | 18.85 | 0.72 |
| 268.6631 | 27.07  | 16.20 | 17.09 | 18.43 | 16.92 | 0.90 |
| 268.8397 | 46.02  | 17.93 | 18.84 | 19.04 | 18.70 | 1.34 |
| 268.8464 | 48.49  | 16.04 | 15.63 | 15.69 | 16.00 | 0.30 |
| 268.8910 | 63.68  | 15.86 | 15.12 | 15.62 | 15.90 | 0.21 |
| 268.9064 | 42.53  | 14.11 | 13.62 | 14.03 | 15.06 | 0.05 |
| 268.9466 | 34.51  | 18.57 | 22.47 | 23.40 | 21.52 | 1.68 |
| 268.9614 | 40.44  | 14.61 | 14.31 | 14.86 | 14.82 | 0.01 |
| 268.9732 | 275.96 | 19.00 | 18.99 | 19.76 | 18.71 | 0.17 |
| 268.9826 | 165.69 | 9.86  | 13.59 | 10.54 | 11.87 | 0.59 |
| 269.0121 | 59.49  | 15.62 | 13.95 | 15.91 | 15.06 | 0.40 |
| 269.0276 | 110.19 | 15.39 | 13.75 | 14.02 | 13.48 | 0.50 |
| 269.0397 | 236.79 | 17.12 | 18.78 | 12.34 | 17.23 | 0.24 |
| 269.0549 | 59.76  | 17.93 | 17.80 | 18.85 | 17.72 | 0.32 |
| 269.0735 | 58.34  | 16.00 | 15.46 | 15.44 | 15.47 | 0.25 |
| 269.0880 | 55.9   | 22.18 | 21.40 | 21.87 | 21.92 | 0.42 |
| 269.0949 | 82.73  | 20.79 | 22.43 | 21.77 | 22.55 | 0.80 |
| 269.1012 | 50.77  | 19.50 | 20.34 | 20.37 | 19.35 | 0.41 |
| 269.1074 | 56.69  | 21.57 | 23.45 | 23.38 | 21.87 | 0.56 |
| 269.1135 | 58.37  | 16.77 | 17.16 | 15.63 | 16.11 | 0.16 |
| 269.1270 | 35.97  | 14.00 | 16.96 | 16.73 | 16.80 | 1.13 |
| 269.1457 | 29.16  | 15.50 | 17.75 | 16.88 | 17.37 | 1.30 |
| 269.1510 | 27.99  | 12.84 | 19.15 | 18.00 | 17.91 | 1.68 |
| 269.1605 | 56.33  | 18.49 | 18.31 | 18.42 | 18.30 | 0.16 |
| 269.1747 | 182.7  | 16.90 | 14.00 | 14.32 | 14.93 | 1.62 |
| 269.2111 | 160.31 | 20.42 | 18.57 | 19.29 | 18.38 | 0.49 |
| 269.2261 | 25.98  | 24.22 | 22.46 | 22.92 | 23.63 | 0.92 |
| 269.2336 | 64.31  | 14.71 | 15.06 | 13.10 | 15.16 | 0.21 |
| 269.2473 | 291.3  | 19.10 | 17.76 | 17.65 | 18.08 | 0.83 |
| 269.5249 | 85.55  | 15.31 | 16.17 | 16.25 | 16.37 | 0.73 |
| 269.5672 | 225.87 | 15.71 | 22.28 | 22.76 | 20.75 | 1.52 |
| 269.5737 | 58.58  | 15.82 | 16.03 | 16.29 | 15.49 | 0.11 |
| 269.5962 | 82.5   | 18.97 | 20.17 | 19.47 | 20.43 | 0.55 |
| 269.6433 | 29.03  | 17.38 | 21.52 | 20.58 | 20.66 | 1.76 |
| 269.9211 | 42.19  | 20.00 | 18.73 | 19.66 | 18.21 | 0.68 |
| 269.9502 | 28.26  | 15.04 | 18.32 | 19.48 | 18.30 | 1.63 |
| 269.9686 | 108.85 | 18.68 | 17.91 | 18.72 | 17.43 | 0.40 |
| 269.9929 | 53.85  | 18.99 | 15.89 | 15.13 | 15.84 | 1.22 |
| 270.0102 | 57.33  | 17.92 | 19.44 | 19.73 | 19.78 | 0.85 |
| 270.0422 | 128.59 | 13.12 | 15.66 | 15.37 | 15.33 | 1.16 |
| 270.0497 | 59.76  | 17.04 | 16.65 | 17.83 | 16.53 | 0.03 |
| 270.0592 | 251.24 | 14.88 | 17.47 | 18.48 | 17.62 | 1.40 |
| 270.0644 | 173.15 | 11.20 | 14.37 | 14.96 | 14.55 | 1.08 |
| 270.0683 | 232.97 | 15.76 | 19.68 | 20.20 | 18.88 | 1.63 |

|          |        |       |       |       |       |      |
|----------|--------|-------|-------|-------|-------|------|
| 270.0949 | 69.04  | 19.50 | 20.28 | 18.96 | 20.48 | 0.16 |
| 270.1042 | 37.76  | 16.44 | 15.35 | 15.31 | 15.00 | 0.76 |
| 270.1093 | 40.31  | 18.28 | 18.53 | 18.57 | 17.77 | 0.10 |
| 270.1129 | 295.1  | 12.63 | 14.33 | 14.83 | 12.92 | 0.73 |
| 270.1198 | 91.33  | 17.03 | 17.47 | 17.55 | 17.26 | 0.31 |
| 270.1335 | 219.94 | 16.46 | 13.43 | 13.71 | 14.83 | 1.13 |
| 270.1449 | 32.18  | 16.85 | 19.34 | 18.40 | 19.00 | 1.56 |
| 270.1699 | 225.61 | 16.97 | 14.32 | 14.44 | 14.86 | 1.44 |
| 270.2143 | 287.72 | 18.35 | 17.14 | 17.07 | 17.27 | 0.87 |
| 270.2294 | 25.09  | 21.98 | 20.05 | 20.56 | 21.16 | 0.94 |
| 270.2428 | 161.79 | 17.10 | 14.65 | 14.85 | 15.40 | 1.39 |
| 270.2508 | 189.66 | 16.44 | 10.61 | 10.54 | 12.65 | 1.37 |
| 270.2789 | 289.63 | 17.15 | 16.53 | 16.60 | 16.25 | 0.47 |
| 270.2790 | 21.01  | 16.29 | 13.25 | 13.45 | 14.03 | 1.68 |
| 270.5118 | 56.57  | 15.36 | 15.73 | 15.14 | 15.87 | 0.07 |
| 270.5538 | 90.45  | 16.45 | 15.77 | 16.40 | 15.96 | 0.35 |
| 270.5608 | 256.29 | 16.27 | 17.29 | 18.43 | 17.36 | 0.92 |
| 270.5678 | 227.38 | 11.66 | 16.32 | 13.69 | 15.60 | 0.97 |
| 270.5949 | 80.69  | 15.88 | 16.40 | 15.33 | 16.65 | 0.08 |
| 270.6234 | 27.24  | 16.52 | 20.42 | 19.40 | 19.24 | 1.48 |
| 270.6415 | 27.46  | 16.45 | 19.10 | 17.92 | 18.65 | 1.61 |
| 270.7896 | 44.77  | 21.29 | 21.72 | 21.64 | 21.27 | 0.30 |
| 270.7975 | 49.91  | 17.60 | 18.51 | 18.59 | 18.42 | 0.65 |
| 270.9446 | 33.56  | 15.55 | 19.69 | 20.59 | 18.86 | 1.71 |
| 270.9503 | 41.92  | 13.11 | 13.87 | 15.95 | 13.45 | 0.74 |
| 270.9579 | 48.46  | 18.25 | 18.68 | 19.40 | 19.18 | 0.58 |
| 270.9781 | 55.55  | 17.67 | 18.89 | 19.19 | 18.71 | 1.25 |
| 270.9892 | 30.71  | 13.42 | 15.94 | 15.71 | 14.58 | 0.99 |
| 271.0073 | 65.65  | 16.84 | 16.80 | 17.04 | 17.29 | 0.06 |
| 271.0122 | 55.96  | 13.55 | 13.20 | 14.77 | 15.00 | 0.20 |
| 271.0254 | 83.87  | 15.83 | 16.92 | 17.39 | 16.34 | 0.85 |
| 271.0428 | 78.07  | 20.34 | 20.40 | 21.19 | 20.51 | 0.24 |
| 271.0678 | 154.35 | 10.73 | 17.07 | 16.48 | 14.62 | 1.62 |
| 271.0747 | 58.03  | 18.92 | 17.57 | 17.72 | 17.22 | 0.99 |
| 271.0912 | 53.7   | 17.08 | 15.23 | 14.98 | 16.66 | 0.67 |
| 271.1037 | 111.09 | 17.19 | 19.06 | 19.09 | 18.83 | 1.55 |
| 271.1286 | 280.94 | 19.36 | 16.63 | 16.53 | 17.17 | 1.49 |
| 271.1376 | 54.14  | 17.88 | 18.40 | 17.65 | 18.33 | 0.22 |
| 271.1431 | 28.75  | 15.77 | 18.40 | 16.87 | 17.14 | 1.09 |
| 271.1904 | 221.72 | 16.78 | 14.26 | 14.25 | 14.56 | 1.23 |
| 271.2053 | 28.63  | 16.92 | 12.48 | 14.56 | 15.78 | 1.13 |
| 271.2056 | 193.02 | 16.59 | 13.81 | 13.79 | 14.60 | 1.31 |
| 271.2266 | 144.84 | 20.06 | 19.68 | 19.57 | 19.38 | 0.25 |
| 271.2327 | 23.8   | 18.61 | 14.98 | 16.27 | 17.19 | 1.30 |
| 271.2416 | 23.83  | 16.93 | 13.55 | 13.94 | 14.89 | 1.44 |
| 271.2630 | 289.85 | 17.08 | 16.00 | 16.16 | 16.08 | 0.80 |
| 271.2631 | 172.33 | 17.67 | 15.64 | 16.01 | 16.06 | 1.28 |
| 271.5576 | 119.65 | 17.08 | 11.76 | 13.86 | 12.67 | 1.14 |
| 271.6418 | 28.19  | 15.42 | 17.61 | 15.77 | 17.43 | 0.93 |
| 271.6494 | 31.57  | 15.75 | 18.09 | 16.67 | 17.85 | 1.33 |
| 271.6581 | 36.23  | 16.55 | 19.39 | 20.47 | 18.97 | 1.55 |
| 271.9171 | 21.84  | 20.87 | 16.67 | 17.04 | 18.12 | 1.95 |
| 271.9466 | 26.12  | 14.17 | 13.50 | 14.92 | 13.81 | 0.07 |
| 271.9543 | 26.31  | 15.92 | 13.57 | 13.90 | 14.49 | 0.94 |
| 271.9638 | 50.92  | 17.70 | 14.11 | 14.99 | 15.37 | 1.11 |
| 271.9854 | 267.43 | 17.29 | 19.42 | 18.38 | 17.62 | 0.54 |

|          |        |       |       |       |       |      |
|----------|--------|-------|-------|-------|-------|------|
| 271.9856 | 144.22 | 18.52 | 20.52 | 19.44 | 18.47 | 0.52 |
| 272.0036 | 252.89 | 13.63 | 16.51 | 15.95 | 13.97 | 1.02 |
| 272.0204 | 257    | 17.36 | 15.57 | 16.15 | 15.56 | 0.92 |
| 272.0300 | 249.23 | 12.40 | 14.86 | 16.33 | 14.46 | 1.07 |
| 272.0653 | 138.26 | 20.04 | 21.32 | 21.58 | 19.94 | 0.65 |
| 272.0697 | 64.76  | 14.02 | 15.47 | 14.69 | 14.38 | 0.43 |
| 272.0771 | 72.66  | 16.03 | 15.41 | 14.89 | 15.55 | 0.27 |
| 272.0900 | 75.54  | 16.63 | 15.88 | 16.50 | 16.76 | 0.30 |
| 272.1337 | 60.78  | 15.10 | 13.78 | 13.80 | 14.11 | 0.36 |
| 272.1492 | 206.52 | 17.49 | 14.83 | 15.26 | 15.51 | 1.63 |
| 272.1596 | 33.9   | 15.23 | 17.64 | 18.78 | 17.51 | 1.33 |
| 272.1716 | 58.59  | 18.03 | 17.06 | 17.53 | 17.30 | 0.70 |
| 272.1854 | 24.42  | 17.36 | 17.02 | 16.84 | 16.42 | 0.53 |
| 272.1857 | 182.91 | 17.16 | 14.68 | 15.01 | 15.57 | 1.60 |
| 272.2300 | 287.85 | 17.87 | 16.76 | 16.74 | 16.61 | 0.84 |
| 272.2582 | 23.28  | 16.32 | 13.28 | 13.12 | 15.74 | 1.20 |
| 272.5668 | 132.84 | 17.99 | 18.66 | 18.92 | 17.30 | 0.33 |
| 272.5832 | 70.47  | 16.31 | 14.60 | 16.21 | 14.86 | 0.43 |
| 272.6571 | 27.27  | 15.75 | 20.23 | 19.71 | 19.57 | 1.82 |
| 272.6659 | 34.04  | 14.85 | 18.14 | 19.15 | 17.60 | 1.41 |
| 272.7869 | 44.71  | 21.07 | 21.54 | 21.45 | 21.09 | 0.33 |
| 272.7945 | 49.52  | 17.51 | 18.99 | 19.06 | 18.85 | 0.85 |
| 272.8548 | 100.74 | 18.56 | 15.26 | 17.28 | 15.37 | 1.00 |
| 272.8638 | 120.94 | 14.55 | 15.43 | 15.34 | 16.18 | 0.46 |
| 272.9558 | 43.82  | 17.01 | 16.59 | 17.51 | 17.56 | 0.06 |
| 272.9693 | 281.67 | 19.29 | 22.37 | 22.71 | 21.36 | 1.20 |
| 272.9809 | 48.97  | 14.81 | 12.33 | 15.45 | 13.51 | 0.39 |
| 272.9887 | 56.12  | 17.10 | 13.18 | 15.77 | 15.16 | 0.97 |
| 272.9889 | 138.39 | 13.35 | 14.39 | 11.60 | 11.67 | 0.12 |
| 273.0057 | 83.76  | 18.32 | 19.61 | 19.14 | 19.02 | 0.76 |
| 273.0185 | 53.17  | 21.19 | 22.44 | 22.41 | 21.97 | 1.49 |
| 273.0377 | 258.74 | 18.56 | 20.93 | 21.67 | 20.68 | 1.51 |
| 273.0491 | 50.3   | 17.44 | 16.52 | 16.61 | 16.74 | 0.59 |
| 273.0674 | 136.78 | 15.90 | 15.16 | 15.36 | 14.52 | 0.42 |
| 273.0751 | 61.9   | 17.88 | 19.06 | 19.38 | 18.80 | 1.50 |
| 273.0827 | 69.29  | 19.08 | 18.33 | 18.32 | 18.39 | 0.58 |
| 273.1081 | 64.96  | 15.32 | 15.59 | 14.59 | 15.41 | 0.05 |
| 273.1212 | 54.2   | 18.55 | 18.35 | 17.87 | 18.54 | 0.25 |
| 273.1349 | 31.17  | 14.82 | 15.99 | 16.52 | 11.82 | 0.22 |
| 273.1445 | 239.61 | 18.50 | 20.29 | 20.51 | 19.97 | 1.28 |
| 273.1588 | 27.55  | 16.30 | 18.19 | 17.73 | 18.05 | 1.61 |
| 273.1671 | 235.15 | 17.74 | 15.65 | 16.14 | 16.47 | 1.41 |
| 273.1741 | 71.16  | 15.56 | 16.08 | 16.52 | 16.14 | 0.35 |
| 273.1846 | 23.66  | 17.03 | 13.42 | 14.65 | 15.85 | 1.54 |
| 273.1848 | 190.77 | 17.12 | 14.25 | 14.30 | 15.10 | 1.55 |
| 273.2213 | 192.17 | 16.23 | 13.59 | 12.72 | 13.87 | 0.84 |
| 273.2574 | 24.07  | 17.87 | 15.55 | 15.77 | 16.18 | 1.62 |
| 273.4925 | 85.74  | 15.38 | 17.93 | 17.78 | 17.00 | 1.38 |
| 273.5412 | 264.25 | 15.44 | 15.10 | 15.75 | 13.78 | 0.17 |
| 273.5638 | 93.47  | 16.78 | 17.38 | 17.38 | 16.67 | 0.39 |
| 273.5829 | 85.99  | 15.98 | 16.11 | 15.83 | 15.69 | 0.02 |
| 273.6467 | 27.78  | 15.67 | 17.98 | 16.91 | 17.76 | 1.33 |
| 273.6649 | 28.66  | 15.79 | 19.06 | 18.41 | 18.76 | 1.75 |
| 273.6738 | 22.42  | 10.34 | 14.82 | 18.01 | 14.94 | 1.25 |
| 273.8961 | 303.8  | 14.95 | 17.63 | 16.36 | 16.54 | 0.98 |
| 273.9730 | 197.4  | 12.88 | 16.93 | 17.29 | 15.13 | 1.27 |

|          |        |       |       |       |       |      |
|----------|--------|-------|-------|-------|-------|------|
| 273.9786 | 256.73 | 16.85 | 17.93 | 17.91 | 16.71 | 0.47 |
| 273.9932 | 85.64  | 15.48 | 16.09 | 16.11 | 15.46 | 0.40 |
| 274.0075 | 90.51  | 14.52 | 14.06 | 13.09 | 14.92 | 0.22 |
| 274.0147 | 287.69 | 15.57 | 16.42 | 17.86 | 16.40 | 0.87 |
| 274.0215 | 63.31  | 16.77 | 17.12 | 17.07 | 16.72 | 0.36 |
| 274.0352 | 35.55  | 15.30 | 13.05 | 15.81 | 15.39 | 0.44 |
| 274.0403 | 270.97 | 11.40 | 15.85 | 17.03 | 15.48 | 1.77 |
| 274.0584 | 57.68  | 17.83 | 16.90 | 17.13 | 16.00 | 0.45 |
| 274.0685 | 223.08 | 15.37 | 17.17 | 17.15 | 16.28 | 1.38 |
| 274.0856 | 57.18  | 14.51 | 15.67 | 15.75 | 15.32 | 0.56 |
| 274.0919 | 285.04 | 18.39 | 18.17 | 19.29 | 17.84 | 0.10 |
| 274.1034 | 215.38 | 12.30 | 16.83 | 16.87 | 16.84 | 1.55 |
| 274.1035 | 68.58  | 13.72 | 14.29 | 14.15 | 15.38 | 0.36 |
| 274.1110 | 28.26  | 13.70 | 14.69 | 13.73 | 15.53 | 0.30 |
| 274.1218 | 40.36  | 14.29 | 17.04 | 18.16 | 17.48 | 1.31 |
| 274.1286 | 208.6  | 16.05 | 13.54 | 13.78 | 14.25 | 0.66 |
| 274.1480 | 220.75 | 15.11 | 16.10 | 15.65 | 16.11 | 0.62 |
| 274.1588 | 275.46 | 17.20 | 15.85 | 15.83 | 16.05 | 1.10 |
| 274.1650 | 28.66  | 18.36 | 18.26 | 18.17 | 18.04 | 0.30 |
| 274.1754 | 47.38  | 14.63 | 15.41 | 16.57 | 16.28 | 0.53 |
| 274.1853 | 40.52  | 17.51 | 18.21 | 18.06 | 18.02 | 0.62 |
| 274.2010 | 24.58  | 17.40 | 15.92 | 16.70 | 16.87 | 0.93 |
| 274.2739 | 23.1   | 13.57 | 14.68 | 12.05 | 13.26 | 0.04 |
| 274.5829 | 85.6   | 14.78 | 16.66 | 15.49 | 15.48 | 0.69 |
| 274.6241 | 30.49  | 18.94 | 13.25 | 15.16 | 14.86 | 1.68 |
| 274.6355 | 28     | 17.77 | 15.32 | 16.08 | 15.09 | 0.91 |
| 274.6547 | 29.81  | 16.65 | 20.71 | 19.87 | 20.21 | 1.76 |
| 274.7845 | 44.77  | 19.48 | 19.72 | 19.67 | 19.33 | 0.16 |
| 274.7916 | 50.14  | 17.20 | 17.87 | 17.98 | 17.92 | 0.53 |
| 274.8732 | 45.67  | 19.82 | 20.40 | 20.63 | 20.56 | 0.77 |
| 274.8811 | 48.72  | 16.16 | 16.52 | 16.35 | 16.84 | 0.31 |
| 274.9071 | 47.75  | 16.69 | 17.13 | 18.30 | 17.69 | 0.97 |
| 274.9298 | 307.23 | 14.69 | 15.49 | 13.06 | 13.01 | 0.29 |
| 274.9330 | 42.19  | 17.33 | 18.90 | 19.24 | 18.51 | 1.29 |
| 274.9518 | 29.98  | 17.04 | 18.50 | 19.58 | 18.89 | 1.51 |
| 274.9903 | 190.87 | 15.64 | 14.70 | 15.72 | 16.16 | 0.12 |
| 275.0053 | 66.4   | 17.89 | 13.68 | 12.78 | 14.57 | 1.47 |
| 275.0152 | 51     | 17.72 | 18.70 | 19.15 | 18.41 | 1.34 |
| 275.0170 | 295.85 | 12.16 | 17.55 | 18.25 | 14.77 | 1.57 |
| 275.0339 | 69.99  | 16.83 | 10.56 | 14.30 | 11.91 | 1.23 |
| 275.0954 | 71.81  | 14.74 | 14.38 | 14.83 | 15.12 | 0.04 |
| 275.1309 | 46.91  | 17.08 | 17.56 | 18.47 | 18.58 | 0.68 |
| 275.1563 | 27.99  | 15.89 | 18.55 | 17.70 | 18.42 | 1.68 |
| 275.1640 | 212.52 | 15.96 | 10.60 | 11.73 | 11.56 | 1.34 |
| 275.1715 | 56.08  | 16.68 | 17.68 | 17.16 | 17.97 | 0.64 |
| 275.2003 | 23.16  | 17.36 | 14.53 | 15.29 | 16.66 | 1.47 |
| 275.2005 | 184.31 | 17.75 | 15.09 | 15.59 | 15.84 | 1.47 |
| 275.2005 | 280.06 | 17.45 | 15.96 | 15.97 | 16.21 | 1.02 |
| 275.4890 | 304.8  | 13.15 | 17.38 | 16.30 | 14.12 | 1.50 |
| 275.5671 | 231.35 | 17.82 | 23.52 | 23.84 | 22.36 | 1.53 |
| 275.6328 | 29.19  | 21.38 | 17.73 | 18.08 | 18.32 | 1.92 |
| 275.6443 | 28.02  | 13.69 | 18.31 | 17.43 | 17.38 | 1.78 |
| 275.8661 | 51.74  | 20.19 | 17.76 | 17.81 | 16.83 | 1.21 |
| 275.8766 | 43.82  | 15.12 | 14.99 | 15.06 | 15.11 | 0.05 |
| 275.9250 | 282.78 | 16.42 | 18.38 | 17.99 | 16.92 | 1.14 |
| 275.9344 | 254.85 | 20.49 | 21.20 | 20.08 | 20.42 | 0.09 |

|          |        |       |       |       |       |      |
|----------|--------|-------|-------|-------|-------|------|
| 275.9511 | 71.16  | 13.89 | 14.35 | 13.99 | 14.52 | 0.11 |
| 275.9603 | 35.26  | 14.74 | 13.33 | 13.31 | 13.89 | 0.81 |
| 276.0007 | 87.52  | 17.77 | 18.72 | 17.81 | 18.62 | 0.42 |
| 276.0166 | 81.63  | 17.39 | 8.37  | 9.60  | 13.74 | 1.62 |
| 276.0689 | 238.15 | 16.86 | 20.91 | 21.42 | 19.98 | 1.39 |
| 276.0842 | 85.54  | 17.75 | 16.37 | 16.15 | 16.46 | 0.76 |
| 276.0919 | 83.43  | 15.42 | 17.29 | 16.98 | 16.96 | 1.32 |
| 276.1078 | 217.95 | 16.17 | 12.71 | 12.86 | 13.67 | 1.02 |
| 276.1190 | 171.6  | 16.38 | 20.62 | 15.49 | 18.66 | 0.46 |
| 276.1263 | 32.75  | 18.28 | 17.14 | 17.04 | 18.02 | 0.88 |
| 276.1353 | 29.88  | 19.59 | 17.07 | 17.16 | 17.46 | 1.50 |
| 276.1445 | 40.84  | 15.99 | 16.44 | 16.38 | 17.14 | 0.22 |
| 276.1554 | 105.21 | 18.92 | 21.34 | 19.32 | 20.69 | 0.91 |
| 276.1666 | 70.11  | 15.72 | 17.19 | 17.20 | 17.11 | 0.83 |
| 276.1804 | 36.51  | 21.31 | 22.11 | 21.77 | 21.58 | 0.73 |
| 276.1918 | 60.6   | 17.45 | 19.11 | 19.17 | 18.67 | 1.63 |
| 276.1988 | 23.8   | 14.34 | 12.99 | 12.24 | 13.00 | 0.72 |
| 276.4047 | 293.03 | 15.23 | 14.84 | 15.05 | 14.71 | 0.32 |
| 276.5649 | 237.69 | 14.88 | 19.40 | 19.90 | 18.67 | 1.44 |
| 276.5699 | 226.55 | 12.22 | 17.24 | 17.60 | 16.42 | 1.58 |
| 276.5737 | 99.77  | 16.37 | 16.67 | 15.99 | 16.17 | 0.02 |
| 276.5808 | 60.13  | 14.11 | 15.32 | 14.95 | 14.86 | 0.49 |
| 276.6342 | 28.19  | 17.22 | 12.86 | 13.98 | 13.77 | 1.74 |
| 276.6519 | 27.22  | 17.76 | 21.83 | 19.88 | 19.99 | 1.38 |
| 276.7822 | 45.06  | 16.96 | 16.70 | 16.41 | 16.73 | 0.43 |
| 276.7889 | 49.28  | 15.89 | 15.05 | 15.27 | 15.18 | 0.51 |
| 276.8439 | 108.7  | 14.51 | 14.98 | 12.61 | 15.39 | 0.22 |
| 276.8712 | 46.53  | 17.73 | 17.95 | 18.26 | 18.15 | 0.42 |
| 276.8772 | 30.03  | 16.49 | 16.21 | 16.68 | 16.26 | 0.08 |
| 276.9042 | 47.8   | 14.66 | 14.13 | 15.98 | 15.18 | 0.23 |
| 276.9225 | 49.07  | 16.49 | 18.64 | 19.02 | 18.47 | 1.77 |
| 276.9380 | 112.44 | 14.21 | 14.89 | 15.74 | 14.95 | 0.51 |
| 276.9497 | 19.95  | 14.56 | 12.46 | 13.96 | 12.90 | 0.92 |
| 276.9624 | 179.77 | 12.98 | 13.88 | 14.43 | 12.96 | 0.34 |
| 277.0464 | 152.65 | 13.98 | 12.54 | 13.68 | 14.59 | 0.32 |
| 277.0607 | 50.54  | 19.20 | 19.02 | 17.96 | 17.35 | 0.63 |
| 277.0667 | 234.78 | 15.19 | 16.72 | 17.21 | 16.42 | 1.21 |
| 277.0837 | 82.73  | 24.18 | 22.89 | 22.55 | 22.51 | 0.84 |
| 277.0894 | 56.63  | 18.22 | 17.95 | 17.90 | 17.71 | 0.44 |
| 277.1037 | 59.21  | 21.67 | 23.52 | 23.76 | 23.62 | 1.29 |
| 277.1160 | 67.86  | 16.53 | 17.29 | 16.93 | 17.30 | 0.45 |
| 277.1223 | 97.81  | 19.16 | 20.51 | 20.79 | 20.60 | 0.99 |
| 277.1298 | 31.75  | 18.71 | 17.34 | 17.24 | 17.77 | 1.03 |
| 277.1392 | 128.64 | 14.66 | 15.55 | 15.87 | 15.87 | 0.56 |
| 277.1580 | 124.83 | 16.25 | 17.69 | 17.81 | 17.18 | 0.89 |
| 277.1797 | 287.78 | 18.89 | 17.48 | 17.49 | 17.55 | 1.03 |
| 277.1951 | 58.82  | 14.79 | 14.74 | 15.01 | 14.54 | 0.02 |
| 277.2158 | 24.44  | 18.78 | 16.78 | 17.22 | 18.30 | 1.17 |
| 277.2160 | 159.78 | 18.99 | 17.53 | 17.83 | 17.72 | 0.63 |
| 277.4821 | 306.44 | 14.75 | 17.07 | 15.25 | 14.33 | 0.85 |
| 277.5852 | 80.7   | 21.74 | 20.12 | 19.80 | 19.78 | 1.01 |
| 277.6668 | 55.04  | 15.38 | 15.98 | 17.19 | 16.33 | 0.68 |
| 277.8623 | 41.34  | 19.50 | 16.54 | 16.40 | 15.17 | 1.33 |
| 277.9180 | 95.68  | 17.41 | 17.37 | 17.02 | 18.17 | 0.04 |
| 277.9388 | 113.25 | 12.53 | 14.27 | 14.50 | 13.66 | 0.70 |
| 277.9499 | 95.59  | 20.44 | 21.13 | 21.87 | 20.79 | 0.71 |

|          |        |       |       |       |       |      |
|----------|--------|-------|-------|-------|-------|------|
| 277.9500 | 226.79 | 17.79 | 16.64 | 15.44 | 17.24 | 0.56 |
| 277.9675 | 78.51  | 14.92 | 18.78 | 19.02 | 18.24 | 1.51 |
| 278.0566 | 39.25  | 14.73 | 14.20 | 14.82 | 14.01 | 0.15 |
| 278.0634 | 286.25 | 13.26 | 14.26 | 15.23 | 14.39 | 0.49 |
| 278.0647 | 54.16  | 16.07 | 13.99 | 14.60 | 14.84 | 0.67 |
| 278.0708 | 300.2  | 15.18 | 17.07 | 17.17 | 15.24 | 0.88 |
| 278.0805 | 233.9  | 16.59 | 19.75 | 19.69 | 19.30 | 1.39 |
| 278.0864 | 80.7   | 19.34 | 17.52 | 16.71 | 17.09 | 1.07 |
| 278.0990 | 88.56  | 15.81 | 16.73 | 16.58 | 17.33 | 0.73 |
| 278.1066 | 73.83  | 18.48 | 20.09 | 20.39 | 20.19 | 1.16 |
| 278.1234 | 78.87  | 16.06 | 16.33 | 16.84 | 16.88 | 0.33 |
| 278.1428 | 24.08  | 12.70 | 14.70 | 12.12 | 15.52 | 0.44 |
| 278.1533 | 58.49  | 15.71 | 16.06 | 15.83 | 15.98 | 0.16 |
| 278.1750 | 212.54 | 16.27 | 13.64 | 13.63 | 13.25 | 0.94 |
| 278.1832 | 208.96 | 15.94 | 12.80 | 13.04 | 13.53 | 1.06 |
| 278.2192 | 24.16  | 16.83 | 13.29 | 14.49 | 15.63 | 1.36 |
| 278.2195 | 172.29 | 16.95 | 14.72 | 14.55 | 15.18 | 1.53 |
| 278.5468 | 287.73 | 12.67 | 17.50 | 15.83 | 16.55 | 1.34 |
| 278.5723 | 258.69 | 19.88 | 22.32 | 23.63 | 22.64 | 1.39 |
| 278.5823 | 218.32 | 14.89 | 16.59 | 16.34 | 16.34 | 0.88 |
| 278.6095 | 24.36  | 16.85 | 12.16 | 12.66 | 13.01 | 1.99 |
| 278.6277 | 29.38  | 17.72 | 13.32 | 13.76 | 14.46 | 1.88 |
| 278.6390 | 27.48  | 16.66 | 20.28 | 19.18 | 19.90 | 1.58 |
| 278.8808 | 107.54 | 15.05 | 17.57 | 13.96 | 17.46 | 0.41 |
| 278.8931 | 34.48  | 16.88 | 13.14 | 16.37 | 14.55 | 0.84 |
| 278.9198 | 48.07  | 15.00 | 16.75 | 17.19 | 16.66 | 1.38 |
| 278.9534 | 98.75  | 15.40 | 13.69 | 14.61 | 14.29 | 0.73 |
| 278.9630 | 65.8   | 15.82 | 16.69 | 16.40 | 16.69 | 0.58 |
| 278.9957 | 166.06 | 17.48 | 16.98 | 16.74 | 16.53 | 0.41 |
| 279.0151 | 96.65  | 15.90 | 12.80 | 15.55 | 14.08 | 0.79 |
| 279.0250 | 101.63 | 16.69 | 14.18 | 13.59 | 14.87 | 1.17 |
| 279.0350 | 49.21  | 18.13 | 16.97 | 17.69 | 17.21 | 0.51 |
| 279.0472 | 44.87  | 16.67 | 17.65 | 16.02 | 17.88 | 0.26 |
| 279.0647 | 103.26 | 16.00 | 19.15 | 19.19 | 18.44 | 1.44 |
| 279.0741 | 251.93 | 19.71 | 22.89 | 23.91 | 22.50 | 1.42 |
| 279.0799 | 51.8   | 19.93 | 18.58 | 19.01 | 19.01 | 0.75 |
| 279.0931 | 278.63 | 17.23 | 16.19 | 16.15 | 16.14 | 0.94 |
| 279.0932 | 180.9  | 17.81 | 15.84 | 16.27 | 16.22 | 1.27 |
| 279.1091 | 56.11  | 17.44 | 18.24 | 17.86 | 18.39 | 0.70 |
| 279.1340 | 40.69  | 17.61 | 14.80 | 14.54 | 15.36 | 1.06 |
| 279.1408 | 27.84  | 14.09 | 18.34 | 17.54 | 17.91 | 1.86 |
| 279.1588 | 23.14  | 18.09 | 16.66 | 16.61 | 16.65 | 1.18 |
| 279.1589 | 282.73 | 19.60 | 18.87 | 18.49 | 18.55 | 0.39 |
| 279.1590 | 153.5  | 19.05 | 18.65 | 18.69 | 18.34 | 0.26 |
| 279.1701 | 25.72  | 16.79 | 16.51 | 16.13 | 17.08 | 0.23 |
| 279.1919 | 49.61  | 17.41 | 16.79 | 17.41 | 17.51 | 0.20 |
| 279.1954 | 229.37 | 16.53 | 14.69 | 14.19 | 14.96 | 1.07 |
| 279.2314 | 24.38  | 20.39 | 18.77 | 19.25 | 20.08 | 1.05 |
| 279.2317 | 186.09 | 20.82 | 18.97 | 18.68 | 19.56 | 0.71 |
| 279.5701 | 253.19 | 13.62 | 17.76 | 19.08 | 18.18 | 1.39 |
| 279.5756 | 261.93 | 17.29 | 20.03 | 21.02 | 19.85 | 1.55 |
| 279.5909 | 60.51  | 16.89 | 16.95 | 17.45 | 17.09 | 0.19 |
| 279.6469 | 27.06  | 20.72 | 25.59 | 24.47 | 24.96 | 1.80 |
| 279.6860 | 55.86  | 18.23 | 18.06 | 17.96 | 17.69 | 0.17 |
| 279.8614 | 48.76  | 16.60 | 11.64 | 12.19 | 12.62 | 1.72 |
| 279.9275 | 118.45 | 13.13 | 14.44 | 15.41 | 14.64 | 0.80 |

|          |        |       |       |       |       |      |
|----------|--------|-------|-------|-------|-------|------|
| 279.9563 | 107.35 | 16.66 | 19.65 | 18.37 | 18.44 | 1.09 |
| 279.9645 | 68.13  | 13.75 | 15.83 | 14.48 | 15.71 | 0.59 |
| 280.0102 | 281.01 | 14.28 | 16.87 | 16.42 | 16.21 | 0.92 |
| 280.0442 | 56.77  | 14.41 | 15.03 | 13.84 | 16.48 | 0.13 |
| 280.0673 | 107.46 | 13.25 | 16.93 | 15.01 | 15.50 | 0.93 |
| 280.0719 | 255.54 | 15.39 | 18.68 | 19.70 | 18.52 | 1.38 |
| 280.0810 | 47.64  | 19.52 | 20.43 | 20.65 | 20.37 | 0.75 |
| 280.0919 | 78.87  | 25.34 | 26.46 | 25.79 | 25.90 | 0.76 |
| 280.1486 | 28.73  | 18.91 | 23.79 | 22.64 | 23.00 | 1.80 |
| 280.1540 | 25.4   | 16.97 | 14.11 | 15.95 | 16.92 | 0.59 |
| 280.1621 | 23.49  | 15.77 | 12.42 | 12.45 | 12.48 | 1.25 |
| 280.1622 | 266.25 | 17.10 | 15.17 | 14.80 | 15.28 | 1.07 |
| 280.1714 | 46.01  | 18.17 | 20.57 | 21.57 | 19.93 | 1.50 |
| 280.1885 | 44.28  | 15.38 | 15.67 | 14.59 | 15.26 | 0.08 |
| 280.1906 | 192.04 | 17.46 | 11.68 | 12.56 | 14.11 | 1.45 |
| 280.2348 | 288.22 | 19.21 | 17.75 | 17.70 | 17.70 | 0.88 |
| 280.2349 | 23.41  | 18.10 | 15.79 | 16.49 | 17.61 | 1.22 |
| 280.2352 | 162.21 | 18.69 | 17.80 | 17.71 | 18.03 | 0.80 |
| 280.2632 | 22.61  | 19.49 | 19.03 | 18.84 | 18.95 | 0.63 |
| 280.6500 | 27.43  | 16.20 | 19.53 | 19.03 | 19.59 | 1.38 |
| 280.6547 | 29.96  | 20.06 | 24.65 | 23.41 | 23.95 | 1.83 |
| 280.6727 | 36.76  | 15.80 | 17.52 | 19.86 | 17.81 | 1.10 |
| 280.8184 | 44.61  | 21.38 | 22.69 | 22.56 | 22.21 | 1.01 |
| 280.8263 | 48.09  | 16.59 | 18.00 | 18.10 | 17.74 | 0.94 |
| 280.8898 | 30.02  | 16.02 | 10.70 | 11.72 | 12.04 | 1.67 |
| 280.9605 | 305.5  | 11.24 | 14.41 | 14.74 | 12.70 | 1.41 |
| 280.9616 | 49.56  | 14.81 | 14.41 | 15.62 | 15.83 | 0.17 |
| 280.9863 | 56.61  | 16.36 | 16.40 | 17.33 | 17.08 | 0.41 |
| 281.0116 | 49.59  | 20.43 | 21.11 | 21.23 | 21.21 | 1.22 |
| 281.0292 | 61.26  | 16.25 | 15.19 | 15.68 | 16.64 | 0.29 |
| 281.0508 | 24.14  | 16.64 | 14.81 | 15.62 | 16.03 | 0.82 |
| 281.0514 | 138.53 | 16.31 | 14.14 | 14.60 | 15.07 | 0.96 |
| 281.0705 | 87.89  | 19.15 | 16.26 | 17.19 | 16.84 | 1.31 |
| 281.0880 | 64.25  | 17.29 | 17.06 | 16.87 | 16.90 | 0.29 |
| 281.0953 | 81.05  | 21.60 | 23.03 | 22.27 | 22.16 | 0.91 |
| 281.1110 | 51.38  | 17.16 | 13.33 | 13.57 | 14.18 | 1.65 |
| 281.1503 | 28.67  | 17.55 | 17.01 | 16.88 | 17.24 | 0.43 |
| 281.1564 | 28.88  | 18.41 | 22.84 | 21.55 | 21.81 | 1.64 |
| 281.1690 | 35.91  | 15.75 | 16.31 | 18.14 | 16.46 | 0.60 |
| 281.1743 | 24.33  | 17.23 | 14.40 | 17.14 | 14.98 | 0.66 |
| 281.1747 | 182.31 | 16.97 | 13.14 | 14.56 | 13.97 | 1.23 |
| 281.2109 | 21.44  | 16.57 | 12.59 | 13.62 | 14.81 | 1.50 |
| 281.2110 | 162.62 | 17.22 | 14.33 | 14.36 | 15.37 | 1.46 |
| 281.2666 | 23.05  | 17.06 | 15.75 | 15.59 | 16.08 | 1.21 |
| 281.4814 | 89.73  | 15.24 | 15.47 | 16.04 | 15.14 | 0.27 |
| 281.4948 | 88.88  | 15.56 | 16.66 | 16.35 | 15.92 | 0.56 |
| 281.6430 | 27.45  | 15.96 | 19.87 | 18.64 | 19.30 | 1.68 |
| 281.6625 | 31     | 20.71 | 25.85 | 24.97 | 25.06 | 1.86 |
| 281.8218 | 44.81  | 16.15 | 16.57 | 16.21 | 16.51 | 0.39 |
| 281.9451 | 40.02  | 17.00 | 16.07 | 16.11 | 16.00 | 0.94 |
| 281.9598 | 43.4   | 15.59 | 15.70 | 16.10 | 16.27 | 0.23 |
| 281.9976 | 55.78  | 18.26 | 18.74 | 18.96 | 17.94 | 0.38 |
| 282.0122 | 43.67  | 16.71 | 17.08 | 17.23 | 17.43 | 0.56 |
| 282.0487 | 46.93  | 22.28 | 21.38 | 21.72 | 21.64 | 0.80 |
| 282.0963 | 76.41  | 18.17 | 19.75 | 18.85 | 18.71 | 0.66 |
| 282.1118 | 87     | 16.12 | 17.46 | 17.36 | 16.88 | 0.95 |



|          |        |       |       |       |       |      |
|----------|--------|-------|-------|-------|-------|------|
| 282.1183 | 112.47 | 18.45 | 19.42 | 19.48 | 19.05 | 1.34 |
| 282.1456 | 27.86  | 13.20 | 17.70 | 16.77 | 17.34 | 1.23 |
| 282.1642 | 33.52  | 18.76 | 24.06 | 23.16 | 23.21 | 1.90 |
| 282.2064 | 158.98 | 17.79 | 14.63 | 14.14 | 15.94 | 1.45 |
| 282.2213 | 288.14 | 19.28 | 20.02 | 20.00 | 19.76 | 0.33 |
| 282.2216 | 144.29 | 19.68 | 19.06 | 19.57 | 19.25 | 0.26 |
| 282.2505 | 22.2   | 17.62 | 14.07 | 14.82 | 15.53 | 1.84 |
| 282.2506 | 290.9  | 18.60 | 17.80 | 17.88 | 17.80 | 0.42 |
| 282.2789 | 21.93  | 20.20 | 18.97 | 18.90 | 19.33 | 1.40 |
| 282.2790 | 156.73 | 18.43 | 19.71 | 19.98 | 18.24 | 0.64 |
| 282.4796 | 193.8  | 15.12 | 15.41 | 15.87 | 14.74 | 0.14 |
| 282.5730 | 85.27  | 16.73 | 15.92 | 16.43 | 16.27 | 0.41 |
| 282.6234 | 26.98  | 16.64 | 20.19 | 19.33 | 19.48 | 1.57 |
| 282.6342 | 32.3   | 14.53 | 15.28 | 18.61 | 17.22 | 0.67 |
| 282.6510 | 27.13  | 13.69 | 18.82 | 17.65 | 17.94 | 1.73 |
| 282.6606 | 27.83  | 15.59 | 16.88 | 16.62 | 17.26 | 0.86 |
| 282.6656 | 29.77  | 16.95 | 21.31 | 20.40 | 20.42 | 1.70 |
| 282.6789 | 26.35  | 15.57 | 13.34 | 17.43 | 13.84 | 0.25 |
| 282.8159 | 44.58  | 20.51 | 21.88 | 21.75 | 21.45 | 1.09 |
| 282.8233 | 48.09  | 16.86 | 18.25 | 18.26 | 18.15 | 1.13 |
| 282.8683 | 47.68  | 15.81 | 15.59 | 16.46 | 15.56 | 0.06 |
| 282.9358 | 293.18 | 16.13 | 15.66 | 15.52 | 16.57 | 0.24 |
| 282.9635 | 27.41  | 15.17 | 16.30 | 15.49 | 15.81 | 0.51 |
| 282.9731 | 79.35  | 17.62 | 17.73 | 17.95 | 17.26 | 0.10 |
| 282.9998 | 117.52 | 18.10 | 17.99 | 18.72 | 18.29 | 0.18 |
| 283.0069 | 49.4   | 16.94 | 17.71 | 17.75 | 17.87 | 0.90 |
| 283.0136 | 40.13  | 17.69 | 12.50 | 13.05 | 13.25 | 2.02 |
| 283.0187 | 258.03 | 21.22 | 21.92 | 22.34 | 22.18 | 0.62 |
| 283.0265 | 32.54  | 15.76 | 13.75 | 15.08 | 14.66 | 0.74 |
| 283.0372 | 216.03 | 12.82 | 13.66 | 15.85 | 15.35 | 0.49 |
| 283.0455 | 97.07  | 19.26 | 22.96 | 22.79 | 21.78 | 1.66 |
| 283.0519 | 46.87  | 18.76 | 17.31 | 17.55 | 17.63 | 1.07 |
| 283.0689 | 95.41  | 15.52 | 14.86 | 14.62 | 13.09 | 0.44 |
| 283.1217 | 107.99 | 15.39 | 14.83 | 13.41 | 14.44 | 0.69 |
| 283.1252 | 34.57  | 16.21 | 18.32 | 17.92 | 18.44 | 1.36 |
| 283.1359 | 33.29  | 12.64 | 12.61 | 16.04 | 15.10 | 0.49 |
| 283.1527 | 28.91  | 14.50 | 14.42 | 12.70 | 15.13 | 0.14 |
| 283.1638 | 43.7   | 17.79 | 19.50 | 18.81 | 19.42 | 1.04 |
| 283.1748 | 26.08  | 19.32 | 13.81 | 13.97 | 15.56 | 1.87 |
| 283.1901 | 22.28  | 16.97 | 14.84 | 14.48 | 15.29 | 1.64 |
| 283.1902 | 292.09 | 18.29 | 17.05 | 17.02 | 16.92 | 1.00 |
| 283.2054 | 24.19  | 17.42 | 13.72 | 15.03 | 16.22 | 1.35 |
| 283.2254 | 289.9  | 17.73 | 16.85 | 16.87 | 16.65 | 0.82 |
| 283.2628 | 24.15  | 20.23 | 17.68 | 17.81 | 18.51 | 1.71 |
| 283.2822 | 22.45  | 17.79 | 16.42 | 16.18 | 16.69 | 1.40 |
| 283.2824 | 171.36 | 15.79 | 16.28 | 15.86 | 14.41 | 0.02 |
| 283.5439 | 143.25 | 15.36 | 17.53 | 14.26 | 15.47 | 0.28 |
| 283.5886 | 85.98  | 14.74 | 15.03 | 13.83 | 14.72 | 0.12 |
| 283.6009 | 274.54 | 16.26 | 18.93 | 19.46 | 17.82 | 1.39 |
| 283.6311 | 27.32  | 15.72 | 18.34 | 17.46 | 17.56 | 1.53 |
| 283.6585 | 30.39  | 17.62 | 20.56 | 20.64 | 20.01 | 1.62 |
| 283.8193 | 44.78  | 15.28 | 14.83 | 14.83 | 15.04 | 0.40 |
| 283.9278 | 112.24 | 14.61 | 16.96 | 12.99 | 16.54 | 0.23 |
| 283.9394 | 285.45 | 16.52 | 15.80 | 15.85 | 16.01 | 0.40 |
| 283.9431 | 50.57  | 15.94 | 14.56 | 14.41 | 14.65 | 0.78 |
| 283.9670 | 102.2  | 14.65 | 16.41 | 14.65 | 16.25 | 0.76 |

|          |        |       |       |       |       |      |
|----------|--------|-------|-------|-------|-------|------|
| 283.9843 | 110.5  | 17.29 | 18.64 | 18.30 | 18.06 | 1.01 |
| 283.9981 | 307.39 | 9.84  | 14.76 | 10.31 | 10.53 | 0.82 |
| 284.0035 | 48.72  | 16.18 | 16.12 | 16.56 | 16.88 | 0.18 |
| 284.0088 | 44.36  | 14.79 | 15.22 | 15.21 | 15.00 | 0.15 |
| 284.0221 | 270.8  | 16.78 | 17.09 | 17.03 | 16.79 | 0.12 |
| 284.0302 | 55.05  | 16.43 | 17.15 | 18.72 | 15.92 | 0.45 |
| 284.0369 | 98.64  | 16.03 | 16.84 | 16.42 | 16.93 | 0.55 |
| 284.0492 | 94.5   | 15.43 | 17.66 | 16.96 | 16.40 | 1.25 |
| 284.0529 | 217.85 | 17.97 | 21.19 | 21.59 | 20.70 | 1.65 |
| 284.0808 | 84.7   | 20.01 | 18.78 | 18.87 | 19.04 | 1.24 |
| 284.0989 | 61.06  | 21.11 | 20.71 | 21.74 | 20.82 | 0.00 |
| 284.1353 | 81.69  | 19.17 | 18.08 | 18.16 | 18.50 | 0.71 |
| 284.1473 | 146.81 | 15.64 | 16.18 | 16.68 | 15.85 | 0.42 |
| 284.1484 | 244.3  | 16.81 | 12.19 | 12.84 | 13.08 | 1.40 |
| 284.1600 | 29.02  | 14.83 | 18.43 | 18.72 | 17.96 | 1.29 |
| 284.1660 | 51.93  | 15.84 | 15.97 | 15.87 | 15.90 | 0.04 |
| 284.1854 | 25.7   | 17.04 | 17.29 | 16.48 | 16.15 | 0.21 |
| 284.2219 | 209.36 | 16.22 | 14.45 | 13.48 | 14.74 | 0.69 |
| 284.2662 | 22.8   | 17.97 | 14.42 | 14.95 | 16.08 | 1.80 |
| 284.2663 | 293.51 | 18.74 | 17.61 | 17.60 | 18.14 | 0.61 |
| 284.2947 | 147.32 | 20.31 | 20.41 | 20.09 | 20.19 | 0.03 |
| 284.4814 | 145.71 | 11.05 | 13.63 | 14.61 | 13.63 | 1.05 |
| 284.5044 | 104.3  | 11.65 | 15.41 | 14.42 | 15.01 | 1.13 |
| 284.5308 | 36.55  | 14.79 | 14.02 | 16.36 | 14.25 | 0.06 |
| 284.5475 | 258.32 | 14.24 | 14.03 | 12.33 | 12.49 | 0.40 |
| 284.5989 | 212.97 | 9.60  | 14.85 | 14.58 | 13.15 | 1.42 |
| 284.6205 | 26.8   | 15.08 | 17.59 | 15.37 | 16.83 | 0.76 |
| 284.6390 | 30.06  | 14.98 | 18.02 | 16.91 | 17.42 | 1.35 |
| 284.6567 | 26.48  | 15.24 | 13.32 | 16.03 | 14.53 | 0.30 |
| 284.6658 | 25.82  | 15.79 | 14.40 | 17.28 | 15.14 | 0.09 |
| 284.6763 | 58.76  | 14.64 | 13.87 | 15.77 | 15.19 | 0.06 |
| 284.8138 | 44.44  | 18.38 | 19.35 | 19.25 | 19.17 | 0.97 |
| 284.8206 | 48.17  | 16.34 | 16.47 | 16.36 | 16.68 | 0.16 |
| 284.8371 | 48.93  | 12.70 | 10.81 | 14.88 | 12.94 | 0.01 |
| 284.8650 | 47.08  | 15.42 | 15.36 | 15.92 | 15.07 | 0.09 |
| 284.9002 | 19.54  | 15.84 | 13.78 | 13.91 | 14.27 | 1.32 |
| 284.9096 | 32.83  | 15.64 | 15.15 | 14.54 | 15.58 | 0.38 |
| 284.9357 | 32.6   | 16.40 | 15.97 | 16.60 | 15.81 | 0.13 |
| 284.9600 | 31.32  | 16.10 | 13.77 | 14.29 | 14.17 | 0.94 |
| 284.9684 | 117.8  | 11.66 | 14.85 | 15.15 | 14.86 | 1.37 |
| 285.0044 | 251.44 | 17.99 | 17.14 | 16.97 | 17.24 | 0.52 |
| 285.0136 | 121.18 | 17.93 | 20.73 | 18.85 | 19.49 | 0.97 |
| 285.0492 | 97.88  | 11.06 | 15.42 | 15.12 | 13.66 | 1.05 |
| 285.0560 | 242.68 | 11.70 | 15.97 | 16.10 | 15.75 | 1.63 |
| 285.0694 | 79.35  | 19.82 | 17.82 | 16.18 | 18.57 | 1.16 |
| 285.0868 | 83.22  | 15.64 | 16.37 | 13.33 | 14.68 | 0.23 |
| 285.1013 | 51.55  | 17.96 | 16.73 | 17.92 | 17.36 | 0.53 |
| 285.1136 | 42.59  | 14.58 | 17.88 | 15.57 | 15.34 | 0.72 |
| 285.1193 | 81.24  | 17.21 | 17.35 | 17.46 | 17.35 | 0.11 |
| 285.1208 | 192.55 | 12.23 | 17.21 | 16.62 | 15.99 | 1.27 |
| 285.1284 | 54.89  | 16.00 | 16.98 | 14.43 | 16.13 | 0.05 |
| 285.1696 | 207.1  | 16.19 | 11.39 | 10.90 | 11.28 | 1.33 |
| 285.1846 | 292.84 | 19.00 | 17.62 | 17.63 | 17.45 | 0.95 |
| 285.2058 | 274.65 | 17.73 | 16.09 | 15.76 | 16.61 | 1.16 |
| 285.2210 | 23.83  | 19.84 | 17.87 | 18.78 | 19.43 | 1.08 |
| 285.2213 | 167.32 | 18.41 | 16.47 | 17.14 | 17.57 | 1.16 |

|          |        |       |       |       |       |      |
|----------|--------|-------|-------|-------|-------|------|
| 285.2421 | 22.62  | 16.91 | 12.54 | 13.23 | 14.19 | 1.79 |
| 285.2424 | 169.48 | 17.32 | 15.29 | 15.44 | 15.85 | 1.45 |
| 285.2785 | 292.94 | 19.24 | 17.13 | 17.38 | 17.21 | 1.06 |
| 285.2785 | 22.75  | 17.73 | 16.14 | 16.38 | 16.52 | 0.89 |
| 285.2980 | 288.74 | 18.71 | 17.39 | 17.38 | 17.30 | 0.91 |
| 285.5372 | 168.56 | 13.48 | 14.58 | 13.95 | 11.71 | 0.14 |
| 285.8952 | 38.16  | 20.57 | 16.10 | 17.29 | 15.53 | 1.33 |
| 285.9030 | 50.55  | 18.11 | 20.97 | 21.10 | 20.45 | 1.73 |
| 285.9169 | 300.84 | 15.75 | 13.99 | 13.03 | 15.82 | 0.91 |
| 285.9407 | 291.24 | 15.78 | 9.35  | 9.93  | 10.94 | 1.87 |
| 285.9690 | 39.87  | 17.98 | 13.92 | 14.53 | 14.62 | 1.31 |
| 286.0000 | 54.25  | 14.43 | 10.94 | 12.04 | 14.21 | 0.82 |
| 286.0167 | 124.28 | 15.18 | 14.19 | 12.99 | 14.21 | 0.93 |
| 286.0682 | 281.19 | 13.41 | 17.97 | 17.86 | 17.23 | 1.64 |
| 286.0697 | 86.01  | 17.65 | 14.33 | 13.09 | 14.57 | 0.97 |
| 286.1051 | 40.78  | 16.55 | 16.70 | 15.93 | 15.58 | 0.19 |
| 286.1197 | 50.43  | 17.47 | 16.73 | 17.41 | 16.95 | 0.42 |
| 286.1281 | 222.28 | 16.32 | 9.32  | 8.98  | 11.87 | 1.43 |
| 286.1405 | 50.6   | 17.69 | 17.92 | 17.66 | 17.44 | 0.08 |
| 286.1510 | 64.3   | 14.52 | 15.97 | 14.75 | 16.30 | 0.39 |
| 286.1646 | 158.56 | 17.29 | 14.37 | 14.36 | 15.49 | 1.63 |
| 286.1882 | 216.28 | 16.92 | 14.09 | 13.62 | 14.61 | 1.31 |
| 286.2011 | 25.03  | 18.44 | 18.30 | 19.14 | 18.27 | 0.19 |
| 286.2244 | 23.98  | 17.64 | 14.58 | 15.56 | 16.75 | 1.31 |
| 286.2738 | 22.73  | 14.65 | 11.65 | 12.14 | 13.32 | 1.07 |
| 286.3102 | 22.67  | 16.95 | 14.51 | 14.60 | 15.57 | 1.27 |
| 286.5542 | 126.39 | 16.78 | 17.91 | 12.65 | 14.83 | 0.45 |
| 286.5894 | 92.62  | 17.12 | 15.52 | 15.27 | 15.54 | 1.08 |
| 286.5986 | 84.5   | 14.58 | 15.96 | 14.89 | 15.48 | 0.54 |
| 286.7714 | 49.95  | 18.79 | 19.49 | 19.52 | 19.11 | 0.65 |
| 286.8118 | 44.85  | 14.77 | 15.11 | 14.97 | 15.28 | 0.23 |
| 286.8541 | 25.37  | 16.49 | 7.37  | 7.60  | 8.42  | 2.04 |
| 286.9067 | 50.51  | 11.93 | 15.34 | 15.18 | 14.71 | 1.29 |
| 286.9319 | 50.84  | 18.97 | 18.78 | 19.56 | 19.21 | 0.17 |
| 286.9515 | 49.75  | 17.34 | 18.60 | 19.04 | 18.55 | 1.26 |
| 286.9589 | 28.36  | 15.54 | 14.92 | 14.58 | 15.19 | 0.47 |
| 286.9838 | 166.16 | 14.87 | 15.72 | 14.98 | 15.13 | 0.20 |
| 286.9838 | 270.49 | 16.55 | 16.28 | 16.80 | 16.42 | 0.04 |
| 286.9980 | 79.33  | 18.21 | 20.01 | 20.04 | 19.24 | 0.74 |
| 287.0129 | 76.12  | 17.85 | 15.07 | 15.48 | 15.66 | 1.41 |
| 287.0638 | 168.08 | 10.68 | 14.00 | 14.03 | 14.78 | 1.18 |
| 287.0764 | 116.75 | 17.06 | 16.23 | 16.82 | 16.78 | 0.37 |
| 287.0907 | 91.46  | 19.64 | 18.24 | 18.63 | 18.11 | 0.99 |
| 287.1234 | 289.21 | 18.19 | 16.61 | 16.58 | 16.39 | 1.00 |
| 287.2006 | 178.76 | 17.28 | 14.60 | 14.98 | 15.15 | 1.59 |
| 287.2036 | 24.09  | 15.18 | 13.49 | 14.82 | 14.32 | 0.57 |
| 287.2365 | 23.81  | 20.04 | 18.45 | 19.05 | 19.24 | 1.02 |
| 287.2369 | 162.38 | 18.45 | 16.48 | 17.29 | 17.07 | 1.18 |
| 287.2729 | 24.44  | 16.60 | 10.49 | 11.09 | 12.20 | 1.96 |
| 287.6330 | 29.07  | 20.32 | 16.18 | 16.89 | 17.58 | 1.42 |
| 287.6439 | 28.66  | 16.39 | 17.86 | 16.32 | 16.39 | 0.28 |
| 287.8895 | 30.22  | 22.05 | 11.52 | 12.68 | 14.60 | 1.95 |
| 287.8999 | 50.82  | 17.47 | 20.35 | 20.50 | 19.87 | 1.74 |
| 287.9228 | 29.19  | 14.71 | 16.09 | 13.26 | 16.66 | 0.13 |
| 287.9391 | 64.29  | 17.68 | 11.64 | 14.16 | 13.34 | 1.54 |
| 287.9579 | 29.78  | 11.65 | 12.06 | 11.91 | 11.45 | 0.11 |

|          |        |       |       |       |       |      |
|----------|--------|-------|-------|-------|-------|------|
| 287.9580 | 135.78 | 12.06 | 14.08 | 10.07 | 12.08 | 0.05 |
| 287.9803 | 267.24 | 19.50 | 21.50 | 21.81 | 19.84 | 1.05 |
| 287.9958 | 59.39  | 13.40 | 14.82 | 15.71 | 15.39 | 0.77 |
| 288.0246 | 58.76  | 14.31 | 14.14 | 15.03 | 15.05 | 0.13 |
| 288.0514 | 94.4   | 11.10 | 14.59 | 13.39 | 13.88 | 0.98 |
| 288.0690 | 294.46 | 8.57  | 16.89 | 15.09 | 14.80 | 1.52 |
| 288.0747 | 83.36  | 17.35 | 16.60 | 16.84 | 16.53 | 0.59 |
| 288.0826 | 77.28  | 16.38 | 16.78 | 16.71 | 16.94 | 0.35 |
| 288.1002 | 83.8   | 14.94 | 15.32 | 14.11 | 14.39 | 0.12 |
| 288.1070 | 62.62  | 16.06 | 14.70 | 14.64 | 14.84 | 0.55 |
| 288.1189 | 75.2   | 16.50 | 16.96 | 16.96 | 17.24 | 0.44 |
| 288.1346 | 41.63  | 18.61 | 12.01 | 13.56 | 15.17 | 1.64 |
| 288.1600 | 27.13  | 16.89 | 20.50 | 18.87 | 19.52 | 1.45 |
| 288.1802 | 26.21  | 16.78 | 13.19 | 14.92 | 13.49 | 0.90 |
| 288.2029 | 55.54  | 17.14 | 17.42 | 17.45 | 17.48 | 0.39 |
| 288.2167 | 23.84  | 18.75 | 19.35 | 19.72 | 19.34 | 0.65 |
| 288.2281 | 56.51  | 15.11 | 14.40 | 14.44 | 14.02 | 0.43 |
| 288.2399 | 23.76  | 17.78 | 14.24 | 16.08 | 16.18 | 1.14 |
| 288.2895 | 23.18  | 17.65 | 13.36 | 14.58 | 15.50 | 1.57 |
| 288.5410 | 240.17 | 15.21 | 15.00 | 17.07 | 15.46 | 0.40 |
| 288.5712 | 298.04 | 9.54  | 18.18 | 16.75 | 14.68 | 1.64 |
| 288.5920 | 99.92  | 17.91 | 15.96 | 16.87 | 16.28 | 1.09 |
| 288.6408 | 28.28  | 19.73 | 13.61 | 15.59 | 15.42 | 1.63 |
| 288.6518 | 27.51  | 15.16 | 17.90 | 16.29 | 16.75 | 0.64 |
| 288.6617 | 27.5   | 15.35 | 18.36 | 17.09 | 17.87 | 1.56 |
| 288.6703 | 27.37  | 16.04 | 18.59 | 17.79 | 18.31 | 1.76 |
| 288.7685 | 49.87  | 19.18 | 20.02 | 20.04 | 19.62 | 0.72 |
| 288.9210 | 21.08  | 19.84 | 15.59 | 16.60 | 16.58 | 1.77 |
| 288.9292 | 46.81  | 18.05 | 17.01 | 17.88 | 17.60 | 0.66 |
| 288.9416 | 293.37 | 14.39 | 16.90 | 16.15 | 16.49 | 0.95 |
| 288.9418 | 184.78 | 13.22 | 16.93 | 16.16 | 16.43 | 1.05 |
| 288.9551 | 33.37  | 15.04 | 15.64 | 15.65 | 16.33 | 0.55 |
| 288.9835 | 79.09  | 20.25 | 20.59 | 21.61 | 20.97 | 0.60 |
| 288.9837 | 251.65 | 16.01 | 15.54 | 15.95 | 14.81 | 0.29 |
| 288.9902 | 305.66 | 10.49 | 17.77 | 14.62 | 13.63 | 1.49 |
| 288.9922 | 66.26  | 19.01 | 18.19 | 18.57 | 18.38 | 0.60 |
| 289.0106 | 90.72  | 15.55 | 18.31 | 18.76 | 17.30 | 1.51 |
| 289.0247 | 90.59  | 15.59 | 19.51 | 17.78 | 18.44 | 1.31 |
| 289.0311 | 197    | 13.81 | 15.39 | 15.37 | 16.09 | 0.80 |
| 289.0402 | 50.94  | 17.24 | 15.90 | 17.22 | 16.77 | 0.50 |
| 289.0490 | 217.94 | 16.36 | 18.10 | 18.75 | 18.30 | 1.38 |
| 289.0669 | 85.68  | 13.69 | 12.43 | 10.38 | 12.95 | 0.58 |
| 289.0719 | 295.76 | 14.26 | 15.49 | 15.13 | 15.34 | 0.69 |
| 289.1408 | 62.49  | 17.77 | 15.67 | 15.52 | 16.12 | 0.93 |
| 289.1628 | 71.99  | 16.24 | 18.24 | 18.42 | 18.01 | 1.23 |
| 289.1767 | 28.63  | 14.57 | 17.92 | 18.22 | 16.98 | 1.55 |
| 289.1797 | 212.81 | 16.43 | 10.14 | 10.71 | 12.58 | 1.90 |
| 289.2094 | 30.56  | 14.56 | 14.93 | 11.88 | 14.63 | 0.39 |
| 289.2162 | 209.74 | 16.14 | 10.81 | 10.75 | 13.55 | 1.33 |
| 289.2186 | 24.18  | 16.91 | 15.69 | 16.37 | 16.42 | 0.65 |
| 289.2523 | 23.68  | 16.91 | 14.96 | 14.87 | 16.05 | 1.25 |
| 289.5649 | 234.32 | 11.65 | 16.25 | 16.64 | 15.50 | 1.59 |
| 289.5991 | 98.02  | 17.14 | 16.33 | 15.99 | 16.26 | 0.61 |
| 289.6479 | 29.1   | 19.93 | 16.51 | 16.81 | 17.48 | 1.44 |
| 289.6599 | 27.6   | 12.30 | 18.60 | 17.17 | 17.21 | 1.80 |
| 289.6761 | 29.78  | 15.43 | 14.50 | 16.90 | 14.71 | 0.00 |

|          |        |       |       |       |       |      |
|----------|--------|-------|-------|-------|-------|------|
| 289.8968 | 50.54  | 15.09 | 17.51 | 17.68 | 17.11 | 1.21 |
| 289.9261 | 32.79  | 16.49 | 18.14 | 18.16 | 18.55 | 1.47 |
| 289.9432 | 118.59 | 15.01 | 16.06 | 14.74 | 15.86 | 0.18 |
| 289.9659 | 304.77 | 13.03 | 15.19 | 15.51 | 13.78 | 1.12 |
| 289.9852 | 255.42 | 15.58 | 16.50 | 15.99 | 14.98 | 0.23 |
| 290.0335 | 57.29  | 17.25 | 15.43 | 17.19 | 15.11 | 0.53 |
| 290.0343 | 193.88 | 13.68 | 16.13 | 16.18 | 16.34 | 1.03 |
| 290.0568 | 235.25 | 15.96 | 20.18 | 20.90 | 19.39 | 1.45 |
| 290.0660 | 69.85  | 14.04 | 12.01 | 11.26 | 14.79 | 0.54 |
| 290.0762 | 77.39  | 17.31 | 10.64 | 11.39 | 12.56 | 1.56 |
| 290.0805 | 203.18 | 15.16 | 17.54 | 17.41 | 17.29 | 1.13 |
| 290.0868 | 281.09 | 17.05 | 17.64 | 18.29 | 16.89 | 0.55 |
| 290.0871 | 92.49  | 20.23 | 19.80 | 20.24 | 20.17 | 0.28 |
| 290.0981 | 266.92 | 15.26 | 20.38 | 20.64 | 18.94 | 1.60 |
| 290.1346 | 74.5   | 20.48 | 21.59 | 21.43 | 21.76 | 0.82 |
| 290.1485 | 68.69  | 19.46 | 19.43 | 19.35 | 19.85 | 0.00 |
| 290.1599 | 30.69  | 16.30 | 17.59 | 17.27 | 17.48 | 0.73 |
| 290.1823 | 64.79  | 15.40 | 15.44 | 14.72 | 15.19 | 0.12 |
| 290.1890 | 21.73  | 13.47 | 12.66 | 12.89 | 13.64 | 0.26 |
| 290.1960 | 25.42  | 16.34 | 15.96 | 15.03 | 15.57 | 0.46 |
| 290.2114 | 220.01 | 16.60 | 13.91 | 13.77 | 14.80 | 1.18 |
| 290.5484 | 85.26  | 15.88 | 18.83 | 19.38 | 18.49 | 1.62 |
| 290.5587 | 234.68 | 15.82 | 17.48 | 18.22 | 17.11 | 1.31 |
| 290.5780 | 83.89  | 16.43 | 16.61 | 16.26 | 16.32 | 0.00 |
| 290.6277 | 28.15  | 18.60 | 11.93 | 12.55 | 13.42 | 1.99 |
| 290.6390 | 27.35  | 16.80 | 20.66 | 19.42 | 19.87 | 1.59 |
| 290.6676 | 27.04  | 14.52 | 20.31 | 18.77 | 18.35 | 1.49 |
| 290.7653 | 49.17  | 18.33 | 18.93 | 19.06 | 18.59 | 0.55 |
| 290.8473 | 44.77  | 20.71 | 22.88 | 22.54 | 22.64 | 1.47 |
| 290.8551 | 48.27  | 16.09 | 17.62 | 17.63 | 17.61 | 1.38 |
| 290.8653 | 101.83 | 18.08 | 14.84 | 16.52 | 15.24 | 0.91 |
| 290.8831 | 37.94  | 17.57 | 16.77 | 18.09 | 17.39 | 0.19 |
| 290.9072 | 44.57  | 18.56 | 21.66 | 21.37 | 20.89 | 1.85 |
| 290.9278 | 45.66  | 16.90 | 18.21 | 19.55 | 18.39 | 1.24 |
| 290.9641 | 153.38 | 15.31 | 14.20 | 13.44 | 15.29 | 0.48 |
| 290.9794 | 63.35  | 18.09 | 15.72 | 16.78 | 16.08 | 0.96 |
| 290.9904 | 46.76  | 18.70 | 15.70 | 14.84 | 16.22 | 1.19 |
| 291.0050 | 53.73  | 17.03 | 16.62 | 18.44 | 17.32 | 0.29 |
| 291.0216 | 124.36 | 16.22 | 16.75 | 15.62 | 16.70 | 0.07 |
| 291.0473 | 265.89 | 12.32 | 16.29 | 17.57 | 16.12 | 1.75 |
| 291.0495 | 63.76  | 14.48 | 17.60 | 17.25 | 17.28 | 1.16 |
| 291.0547 | 224.41 | 11.88 | 15.91 | 15.62 | 14.70 | 1.44 |
| 291.0646 | 217.97 | 16.60 | 20.00 | 20.52 | 19.27 | 1.41 |
| 291.0838 | 61.05  | 13.43 | 15.83 | 15.50 | 14.64 | 0.66 |
| 291.0905 | 84.19  | 16.07 | 16.05 | 16.14 | 16.57 | 0.04 |
| 291.1026 | 105.68 | 18.16 | 18.95 | 18.49 | 17.87 | 0.32 |
| 291.1181 | 62.66  | 17.99 | 17.12 | 16.61 | 17.54 | 0.53 |
| 291.1299 | 115.74 | 20.24 | 22.14 | 22.71 | 21.88 | 1.18 |
| 291.1393 | 48.78  | 16.99 | 19.44 | 18.42 | 19.29 | 1.07 |
| 291.1550 | 104.19 | 14.72 | 16.36 | 15.95 | 17.02 | 0.85 |
| 291.1690 | 30.14  | 13.58 | 18.68 | 17.26 | 17.61 | 1.39 |
| 291.1953 | 269.73 | 17.13 | 15.61 | 13.41 | 13.52 | 0.98 |
| 291.2313 | 27.67  | 17.06 | 14.02 | 14.71 | 16.20 | 1.01 |
| 291.2680 | 23.26  | 15.94 | 12.07 | 12.64 | 13.70 | 1.24 |
| 291.2682 | 195.47 | 15.48 | 11.72 | 12.35 | 13.36 | 0.91 |
| 291.5467 | 85.79  | 15.80 | 15.97 | 16.84 | 16.51 | 0.40 |

|          |        |       |       |       |       |      |
|----------|--------|-------|-------|-------|-------|------|
| 291.6181 | 29.13  | 16.56 | 18.72 | 18.46 | 16.96 | 1.15 |
| 291.6469 | 30.4   | 20.15 | 24.50 | 23.34 | 23.97 | 1.78 |
| 291.8506 | 44.57  | 16.27 | 17.45 | 17.04 | 17.45 | 0.92 |
| 291.9067 | 256.7  | 18.05 | 15.80 | 13.05 | 16.48 | 1.05 |
| 291.9085 | 79.71  | 18.26 | 18.35 | 18.22 | 19.01 | 0.07 |
| 291.9750 | 56.55  | 17.32 | 18.50 | 18.03 | 18.37 | 0.94 |
| 291.9893 | 258.68 | 17.37 | 17.80 | 18.06 | 17.50 | 0.39 |
| 291.9995 | 256.02 | 16.46 | 18.47 | 18.22 | 17.48 | 1.33 |
| 292.0495 | 85.56  | 16.02 | 18.23 | 18.06 | 17.59 | 1.38 |
| 292.0675 | 59.98  | 17.89 | 17.32 | 17.93 | 17.60 | 0.22 |
| 292.0677 | 194.98 | 10.57 | 14.78 | 14.37 | 14.56 | 1.40 |
| 292.0733 | 54.74  | 20.36 | 19.46 | 20.66 | 20.19 | 0.30 |
| 292.1024 | 274.89 | 17.74 | 16.97 | 17.96 | 16.90 | 0.34 |
| 292.1140 | 89.49  | 17.64 | 17.88 | 18.12 | 18.11 | 0.40 |
| 292.1317 | 119.41 | 16.93 | 18.64 | 18.58 | 18.44 | 1.05 |
| 292.1485 | 30.46  | 18.47 | 22.79 | 21.59 | 22.20 | 1.75 |
| 292.1767 | 79.43  | 16.06 | 12.62 | 10.99 | 10.73 | 1.03 |
| 292.1961 | 53.27  | 16.55 | 17.93 | 16.05 | 18.55 | 0.31 |
| 292.2271 | 290.92 | 17.99 | 16.76 | 16.94 | 16.80 | 0.89 |
| 292.4431 | 21.22  | 13.64 | 12.57 | 12.70 | 14.13 | 0.31 |
| 292.5217 | 307.23 | 13.02 | 15.77 | 13.57 | 12.11 | 0.59 |
| 292.5505 | 84.08  | 15.04 | 15.20 | 15.40 | 15.44 | 0.17 |
| 292.5784 | 125.01 | 18.99 | 17.81 | 18.50 | 17.55 | 0.84 |
| 292.6184 | 33.34  | 14.28 | 14.89 | 16.75 | 15.78 | 0.57 |
| 292.6547 | 31.41  | 17.27 | 21.68 | 20.26 | 20.98 | 1.75 |
| 292.7627 | 48.26  | 16.08 | 16.76 | 16.58 | 16.22 | 0.41 |
| 292.8453 | 44.67  | 18.99 | 20.98 | 20.66 | 20.83 | 1.42 |
| 292.8521 | 48.27  | 16.52 | 17.28 | 17.22 | 17.37 | 0.95 |
| 292.8778 | 40.4   | 15.68 | 14.97 | 16.44 | 15.23 | 0.05 |
| 292.9055 | 45.2   | 16.45 | 19.26 | 18.95 | 18.51 | 1.75 |
| 292.9256 | 45.48  | 14.68 | 13.39 | 15.45 | 14.81 | 0.15 |
| 292.9399 | 49.65  | 16.00 | 15.24 | 16.01 | 15.82 | 0.28 |
| 292.9673 | 90.88  | 17.10 | 20.38 | 20.72 | 19.55 | 1.38 |
| 293.0114 | 135.51 | 17.81 | 15.94 | 16.10 | 16.97 | 0.93 |
| 293.0340 | 54.84  | 18.30 | 16.53 | 17.09 | 15.57 | 0.86 |
| 293.0405 | 35.36  | 14.17 | 11.89 | 16.07 | 13.81 | 0.18 |
| 293.0477 | 73.63  | 15.10 | 16.65 | 15.67 | 15.36 | 0.60 |
| 293.0627 | 59.62  | 16.75 | 16.63 | 16.36 | 16.00 | 0.27 |
| 293.0733 | 63.57  | 16.62 | 12.30 | 15.51 | 15.06 | 0.80 |
| 293.0842 | 85.55  | 18.05 | 16.92 | 16.76 | 16.75 | 0.59 |
| 293.1193 | 51.16  | 17.28 | 17.84 | 17.05 | 17.66 | 0.19 |
| 293.1459 | 58.66  | 16.94 | 17.23 | 16.77 | 17.06 | 0.07 |
| 293.1563 | 28.7   | 15.95 | 19.87 | 18.22 | 19.30 | 1.44 |
| 293.1753 | 169.8  | 17.08 | 11.39 | 14.36 | 12.83 | 1.46 |
| 293.1781 | 27.21  | 16.86 | 20.66 | 19.31 | 20.22 | 1.76 |
| 293.1907 | 24.06  | 16.86 | 13.54 | 14.17 | 15.06 | 1.16 |
| 293.2111 | 269.16 | 19.29 | 17.77 | 17.22 | 17.71 | 1.06 |
| 293.2261 | 23.35  | 15.95 | 10.43 | 12.90 | 13.49 | 1.52 |
| 293.2475 | 209.72 | 16.16 | 11.92 | 12.18 | 12.86 | 1.15 |
| 293.5520 | 271.8  | 12.38 | 14.28 | 15.41 | 12.75 | 0.69 |
| 293.5582 | 83.72  | 14.75 | 16.36 | 16.46 | 16.02 | 0.92 |
| 293.6431 | 27.58  | 14.95 | 18.67 | 17.36 | 18.27 | 1.73 |
| 293.6625 | 27.27  | 15.57 | 19.77 | 18.30 | 18.99 | 1.59 |
| 293.8483 | 49.42  | 14.17 | 14.69 | 14.63 | 14.93 | 0.41 |
| 293.9073 | 171.68 | 14.67 | 13.86 | 13.31 | 16.23 | 0.27 |
| 293.9226 | 95.64  | 16.36 | 16.61 | 16.10 | 17.56 | 0.09 |

|          |        |       |       |       |       |      |
|----------|--------|-------|-------|-------|-------|------|
| 293.9412 | 47.7   | 15.27 | 14.29 | 15.05 | 14.62 | 0.37 |
| 293.9685 | 87.36  | 16.28 | 16.30 | 16.55 | 16.30 | 0.11 |
| 293.9731 | 42.55  | 13.65 | 14.26 | 15.15 | 14.56 | 0.59 |
| 294.0604 | 73.27  | 15.22 | 15.64 | 16.36 | 16.80 | 0.29 |
| 294.0952 | 75.01  | 18.83 | 18.31 | 18.29 | 18.10 | 0.50 |
| 294.1449 | 35.84  | 15.86 | 16.06 | 14.82 | 17.41 | 0.03 |
| 294.1649 | 25.15  | 17.22 | 20.39 | 16.19 | 17.64 | 0.53 |
| 294.1697 | 25.19  | 17.47 | 20.01 | 12.50 | 13.84 | 0.32 |
| 294.1806 | 54.05  | 15.53 | 17.94 | 16.06 | 18.12 | 0.86 |
| 294.1870 | 40.81  | 16.32 | 19.06 | 20.36 | 18.75 | 1.59 |
| 294.2129 | 57.9   | 16.48 | 9.97  | 10.89 | 12.29 | 1.45 |
| 294.2143 | 209.79 | 16.01 | 10.39 | 10.95 | 12.57 | 1.25 |
| 294.5404 | 231.8  | 17.17 | 19.02 | 20.25 | 18.37 | 0.89 |
| 294.5871 | 85.68  | 16.68 | 15.69 | 15.69 | 16.30 | 0.49 |
| 294.6499 | 56.7   | 14.95 | 15.66 | 13.86 | 15.33 | 0.00 |
| 294.6702 | 27.34  | 15.19 | 18.71 | 17.52 | 18.11 | 1.75 |
| 294.6884 | 24.31  | 14.31 | 18.09 | 18.66 | 16.55 | 1.55 |
| 294.8441 | 44.77  | 16.06 | 17.42 | 17.03 | 17.43 | 1.02 |
| 294.8548 | 112.54 | 14.01 | 17.66 | 13.19 | 17.16 | 0.59 |
| 294.8610 | 22.65  | 16.13 | 13.66 | 12.82 | 15.12 | 1.30 |
| 294.8938 | 46.43  | 15.90 | 17.03 | 17.82 | 16.95 | 1.25 |
| 294.9371 | 49.55  | 17.36 | 16.20 | 17.90 | 16.74 | 0.21 |
| 294.9646 | 86.41  | 16.25 | 16.66 | 16.82 | 16.79 | 0.39 |
| 295.0004 | 53     | 22.29 | 23.57 | 23.43 | 22.74 | 1.07 |
| 295.0277 | 60.38  | 16.19 | 15.72 | 17.39 | 17.35 | 0.19 |
| 295.0421 | 246.7  | 14.83 | 14.78 | 17.37 | 15.39 | 0.44 |
| 295.0567 | 60.77  | 17.28 | 15.64 | 16.79 | 15.84 | 0.69 |
| 295.0957 | 91.46  | 16.89 | 17.37 | 19.17 | 19.93 | 0.87 |
| 295.1064 | 73.67  | 15.78 | 16.84 | 17.10 | 16.71 | 1.18 |
| 295.1288 | 43.29  | 18.27 | 17.11 | 17.72 | 17.94 | 0.83 |
| 295.1491 | 45.02  | 16.99 | 10.28 | 9.96  | 12.25 | 1.58 |
| 295.1647 | 33.12  | 15.17 | 18.12 | 17.39 | 17.19 | 0.87 |
| 295.1728 | 26.44  | 15.35 | 17.67 | 17.20 | 17.44 | 1.03 |
| 295.1856 | 26.01  | 14.21 | 17.99 | 17.30 | 16.85 | 1.32 |
| 295.1940 | 22.88  | 16.56 | 20.31 | 19.37 | 19.94 | 1.90 |
| 295.2264 | 23.47  | 18.61 | 17.26 | 17.49 | 17.78 | 1.32 |
| 295.2268 | 155.75 | 19.65 | 19.57 | 19.53 | 19.38 | 0.10 |
| 295.4948 | 110.55 | 11.10 | 15.14 | 14.23 | 12.80 | 1.04 |
| 295.5942 | 59.66  | 16.70 | 16.36 | 15.92 | 16.32 | 0.29 |
| 295.6580 | 26.73  | 14.37 | 17.69 | 18.30 | 17.33 | 1.38 |
| 295.6784 | 38.25  | 14.96 | 17.87 | 16.44 | 17.77 | 1.27 |
| 295.9317 | 51.65  | 19.49 | 20.92 | 21.06 | 20.45 | 1.16 |
| 295.9605 | 90.55  | 15.15 | 16.28 | 15.56 | 16.51 | 0.36 |
| 296.0025 | 53.34  | 17.42 | 18.51 | 18.42 | 17.91 | 0.98 |
| 296.0212 | 89.35  | 17.88 | 16.09 | 17.13 | 17.09 | 0.60 |
| 296.0292 | 297.12 | 11.64 | 15.63 | 16.02 | 14.04 | 1.70 |
| 296.0297 | 36.27  | 15.89 | 17.62 | 17.72 | 17.69 | 1.28 |
| 296.0569 | 27.29  | 14.75 | 20.43 | 19.38 | 19.32 | 1.74 |
| 296.0574 | 89.58  | 19.22 | 15.02 | 14.61 | 14.09 | 1.24 |
| 296.0659 | 78.76  | 24.84 | 26.71 | 26.04 | 26.04 | 1.06 |
| 296.0964 | 67.7   | 18.87 | 19.45 | 19.44 | 19.59 | 0.40 |
| 296.1460 | 27.13  | 20.74 | 17.40 | 17.29 | 17.96 | 1.74 |
| 296.1594 | 26.42  | 14.83 | 13.18 | 17.20 | 14.83 | 0.04 |
| 296.1856 | 165.11 | 18.11 | 15.77 | 15.38 | 16.20 | 1.52 |
| 296.1975 | 27.55  | 14.61 | 17.57 | 15.50 | 17.11 | 1.01 |
| 296.2298 | 22.18  | 16.85 | 12.81 | 13.63 | 14.81 | 1.81 |

|          |        |       |       |       |       |      |
|----------|--------|-------|-------|-------|-------|------|
| 296.2301 | 175.37 | 18.19 | 15.68 | 15.29 | 16.11 | 1.51 |
| 296.2582 | 20.65  | 16.24 | 13.13 | 13.47 | 13.78 | 1.68 |
| 296.2584 | 174.56 | 16.76 | 14.68 | 14.50 | 14.94 | 1.08 |
| 296.5977 | 63.43  | 16.53 | 15.70 | 15.74 | 15.64 | 0.47 |
| 296.6217 | 24.64  | 15.02 | 17.12 | 15.02 | 16.99 | 0.59 |
| 296.6479 | 28.67  | 19.11 | 13.49 | 15.45 | 15.86 | 1.36 |
| 296.6658 | 26.32  | 15.85 | 14.60 | 17.12 | 15.31 | 0.10 |
| 296.8002 | 47.47  | 17.06 | 18.30 | 18.32 | 17.97 | 1.27 |
| 296.9086 | 38.46  | 15.20 | 15.45 | 17.74 | 16.79 | 0.66 |
| 296.9357 | 48.89  | 15.70 | 16.29 | 17.50 | 17.09 | 0.96 |
| 296.9611 | 46.02  | 16.77 | 15.11 | 16.55 | 16.46 | 0.73 |
| 296.9715 | 25.6   | 15.44 | 19.38 | 13.21 | 13.44 | 0.25 |
| 296.9877 | 68.57  | 18.42 | 17.78 | 17.87 | 16.48 | 0.44 |
| 296.9961 | 53.09  | 18.83 | 19.83 | 19.77 | 19.02 | 0.92 |
| 297.0067 | 75.17  | 18.67 | 19.40 | 20.29 | 19.17 | 0.94 |
| 297.0468 | 59.34  | 16.79 | 15.32 | 14.67 | 15.47 | 0.76 |
| 297.0638 | 75.26  | 16.43 | 16.29 | 15.84 | 15.92 | 0.26 |
| 297.0693 | 77.8   | 21.00 | 23.22 | 22.50 | 22.24 | 1.16 |
| 297.1453 | 37.6   | 18.02 | 17.60 | 17.62 | 17.24 | 0.42 |
| 297.1660 | 31.88  | 15.77 | 18.07 | 17.33 | 17.99 | 1.52 |
| 297.1783 | 50.8   | 15.62 | 15.81 | 16.08 | 16.62 | 0.25 |
| 297.2060 | 215.55 | 16.47 | 13.59 | 13.22 | 14.25 | 0.93 |
| 297.2421 | 282.73 | 22.15 | 22.29 | 21.79 | 22.44 | 0.02 |
| 297.2784 | 23.89  | 15.13 | 9.57  | 7.95  | 14.30 | 1.28 |
| 297.5458 | 278.71 | 17.87 | 18.58 | 20.06 | 19.36 | 0.90 |
| 297.6631 | 30.3   | 17.19 | 19.74 | 19.73 | 19.05 | 1.65 |
| 297.9038 | 99     | 15.66 | 15.10 | 17.36 | 15.31 | 0.15 |
| 297.9267 | 32.68  | 18.27 | 19.31 | 19.47 | 19.00 | 1.04 |
| 297.9715 | 56.88  | 17.59 | 17.58 | 18.02 | 17.01 | 0.04 |
| 298.0247 | 51.63  | 16.61 | 15.86 | 15.98 | 16.44 | 0.47 |
| 298.0360 | 108.42 | 14.69 | 14.70 | 13.23 | 13.91 | 0.37 |
| 298.0640 | 78.26  | 20.77 | 22.93 | 22.20 | 21.98 | 1.18 |
| 298.0700 | 75.3   | 18.02 | 19.74 | 18.93 | 18.87 | 0.97 |
| 298.0779 | 235.13 | 17.03 | 20.99 | 21.40 | 20.16 | 1.48 |
| 298.0968 | 95.75  | 23.32 | 24.78 | 24.98 | 24.56 | 1.05 |
| 298.1209 | 31.81  | 16.20 | 17.49 | 18.92 | 18.36 | 1.14 |
| 298.1648 | 33.53  | 15.90 | 18.25 | 17.28 | 17.55 | 1.14 |
| 298.1875 | 83.29  | 14.16 | 19.19 | 18.61 | 18.45 | 1.22 |
| 298.2013 | 182.59 | 17.87 | 15.30 | 15.31 | 15.81 | 1.63 |
| 298.2455 | 289.69 | 19.61 | 18.61 | 18.32 | 18.75 | 0.65 |
| 298.2738 | 22.77  | 19.15 | 18.50 | 18.41 | 18.52 | 0.82 |
| 298.2740 | 154.15 | 18.29 | 16.41 | 16.78 | 17.00 | 1.36 |
| 298.5377 | 96.51  | 14.22 | 13.76 | 16.90 | 15.04 | 0.33 |
| 298.5699 | 239.95 | 21.33 | 24.27 | 24.84 | 23.62 | 1.31 |
| 298.5799 | 239.41 | 14.71 | 16.68 | 16.71 | 16.63 | 0.80 |
| 298.6041 | 59.26  | 17.35 | 17.79 | 17.94 | 17.66 | 0.22 |
| 298.6226 | 31.95  | 15.32 | 14.45 | 16.87 | 16.73 | 0.20 |
| 298.7974 | 47.53  | 17.29 | 18.40 | 18.42 | 18.07 | 1.20 |
| 298.8418 | 45.78  | 16.26 | 16.68 | 17.35 | 16.23 | 0.58 |
| 298.9478 | 44.49  | 16.71 | 16.63 | 17.99 | 16.78 | 0.37 |
| 298.9839 | 245.77 | 20.40 | 19.88 | 20.38 | 20.45 | 0.12 |
| 298.9930 | 253.83 | 17.24 | 16.29 | 17.55 | 17.04 | 0.19 |
| 299.0003 | 65.06  | 16.32 | 13.43 | 13.41 | 15.39 | 0.91 |
| 299.0560 | 211.85 | 18.92 | 21.23 | 21.55 | 20.99 | 1.24 |
| 299.0614 | 24.18  | 16.08 | 12.40 | 14.04 | 14.01 | 1.20 |
| 299.0677 | 74.98  | 17.42 | 19.09 | 16.99 | 17.84 | 0.38 |



|          |        |       |       |       |       |      |
|----------|--------|-------|-------|-------|-------|------|
| 299.0718 | 222.58 | 15.75 | 22.27 | 23.15 | 20.62 | 1.62 |
| 299.0821 | 212.61 | 14.91 | 16.41 | 14.17 | 14.48 | 0.10 |
| 299.0837 | 106.92 | 19.56 | 19.67 | 19.25 | 20.06 | 0.01 |
| 299.0944 | 94.92  | 15.63 | 18.14 | 18.43 | 17.83 | 0.97 |
| 299.1000 | 272.94 | 16.22 | 17.43 | 17.62 | 16.43 | 0.61 |
| 299.1024 | 65.31  | 21.26 | 22.31 | 22.48 | 22.34 | 1.21 |
| 299.1264 | 168.2  | 17.87 | 16.50 | 16.48 | 16.80 | 1.27 |
| 299.1271 | 21.6   | 16.72 | 14.94 | 15.55 | 16.20 | 0.88 |
| 299.1372 | 42.53  | 16.57 | 15.69 | 15.19 | 15.52 | 0.46 |
| 299.1504 | 26.73  | 12.43 | 17.39 | 16.56 | 12.37 | 0.79 |
| 299.1853 | 207.47 | 15.98 | 12.82 | 14.02 | 14.12 | 0.70 |
| 299.1905 | 74.39  | 14.84 | 15.76 | 13.55 | 15.77 | 0.04 |
| 299.2002 | 25.53  | 19.41 | 17.12 | 18.12 | 19.00 | 0.95 |
| 299.2217 | 214.32 | 16.86 | 14.25 | 14.13 | 14.41 | 1.26 |
| 299.2577 | 285.68 | 21.87 | 22.03 | 21.52 | 21.78 | 0.03 |
| 299.2772 | 22.91  | 16.70 | 14.77 | 14.67 | 15.35 | 1.44 |
| 299.5163 | 298.97 | 16.58 | 17.79 | 17.47 | 15.58 | 0.47 |
| 299.5679 | 236.44 | 16.25 | 20.87 | 21.48 | 20.01 | 1.55 |
| 299.5837 | 122.17 | 17.14 | 16.83 | 17.62 | 17.36 | 0.05 |
| 299.6329 | 28.61  | 19.35 | 12.96 | 14.87 | 15.44 | 1.51 |
| 299.6445 | 27.77  | 15.50 | 18.05 | 15.24 | 16.34 | 0.59 |
| 299.6998 | 55.33  | 16.13 | 16.65 | 16.81 | 16.30 | 0.46 |
| 299.9014 | 120.43 | 16.70 | 17.31 | 16.32 | 17.56 | 0.20 |
| 299.9312 | 110.93 | 14.64 | 14.28 | 14.81 | 14.60 | 0.05 |
| 299.9396 | 77.86  | 16.18 | 17.77 | 16.99 | 17.59 | 0.99 |
| 299.9626 | 23.67  | 15.11 | 13.72 | 14.40 | 13.73 | 0.86 |
| 299.9774 | 47.62  | 16.93 | 16.63 | 17.01 | 17.17 | 0.10 |
| 300.0382 | 97.8   | 14.00 | 12.95 | 16.33 | 14.03 | 0.13 |
| 300.0483 | 212.21 | 15.58 | 15.10 | 15.88 | 16.86 | 0.04 |
| 300.0594 | 194.9  | 14.67 | 16.15 | 16.29 | 16.61 | 0.83 |
| 300.0718 | 231.16 | 14.55 | 16.88 | 16.50 | 15.61 | 0.80 |
| 300.0927 | 94.44  | 17.92 | 20.08 | 20.44 | 19.80 | 1.18 |
| 300.1048 | 78.88  | 15.39 | 16.08 | 15.90 | 16.00 | 0.31 |
| 300.1347 | 29.83  | 17.87 | 12.81 | 13.61 | 15.03 | 1.67 |
| 300.1644 | 29.63  | 15.79 | 17.63 | 17.93 | 17.50 | 1.38 |
| 300.1803 | 26.42  | 17.22 | 15.59 | 15.95 | 15.91 | 1.21 |
| 300.2004 | 25.7   | 18.95 | 16.57 | 16.74 | 17.65 | 1.43 |
| 300.2166 | 23.8   | 17.22 | 16.04 | 16.18 | 16.74 | 0.96 |
| 300.2611 | 284.02 | 19.84 | 18.59 | 18.14 | 18.26 | 0.82 |
| 300.2895 | 22.68  | 20.70 | 19.55 | 19.65 | 20.29 | 1.20 |
| 300.4992 | 30.41  | 14.63 | 13.25 | 16.80 | 16.48 | 0.17 |
| 300.5446 | 57.43  | 15.37 | 16.29 | 15.96 | 16.12 | 0.39 |
| 300.5758 | 303.3  | 15.24 | 14.66 | 14.71 | 14.31 | 0.54 |
| 300.6408 | 28.82  | 17.50 | 12.83 | 13.20 | 13.51 | 1.99 |
| 300.6528 | 26.42  | 15.48 | 18.13 | 13.91 | 16.51 | 0.35 |
| 300.7945 | 47.57  | 15.82 | 16.68 | 16.54 | 16.40 | 0.83 |
| 300.8391 | 45.75  | 15.82 | 15.93 | 16.90 | 16.01 | 0.44 |
| 300.8838 | 48.4   | 15.24 | 15.70 | 15.91 | 16.02 | 0.47 |
| 300.9380 | 36.82  | 13.12 | 13.42 | 11.95 | 13.75 | 0.10 |
| 300.9633 | 35.12  | 14.81 | 14.90 | 16.67 | 14.40 | 0.33 |
| 300.9850 | 76.56  | 15.66 | 17.87 | 18.26 | 17.49 | 0.97 |
| 301.0169 | 87.64  | 19.21 | 24.14 | 24.26 | 23.10 | 1.60 |
| 301.0547 | 59.02  | 18.33 | 18.86 | 18.61 | 18.50 | 0.54 |
| 301.0838 | 75.92  | 15.77 | 14.15 | 16.00 | 14.66 | 0.36 |
| 301.0949 | 291.95 | 14.47 | 14.83 | 15.43 | 14.26 | 0.36 |
| 301.1144 | 57.89  | 17.04 | 17.25 | 17.09 | 16.59 | 0.04 |

|          |        |       |       |       |       |      |
|----------|--------|-------|-------|-------|-------|------|
| 301.1408 | 50.37  | 17.89 | 15.82 | 16.24 | 16.51 | 1.40 |
| 301.1514 | 63.67  | 18.01 | 20.07 | 19.79 | 19.66 | 1.51 |
| 301.1714 | 47.41  | 16.59 | 17.53 | 18.20 | 17.43 | 0.98 |
| 301.1798 | 212.68 | 16.51 | 9.94  | 11.27 | 12.73 | 1.51 |
| 301.2013 | 22.87  | 12.62 | 10.02 | 14.14 | 12.73 | 0.20 |
| 301.2153 | 24.4   | 20.16 | 18.23 | 19.13 | 19.58 | 1.02 |
| 301.2162 | 169.51 | 17.84 | 15.67 | 16.41 | 16.14 | 1.23 |
| 301.2928 | 23.28  | 18.10 | 16.22 | 16.53 | 17.40 | 1.42 |
| 301.5178 | 86.27  | 15.74 | 17.94 | 17.61 | 17.60 | 1.21 |
| 301.8767 | 45.58  | 19.10 | 20.94 | 21.23 | 20.47 | 1.52 |
| 301.9017 | 33.06  | 19.28 | 12.95 | 14.26 | 14.43 | 1.75 |
| 301.9739 | 63.28  | 15.71 | 14.54 | 14.47 | 14.62 | 0.40 |
| 301.9862 | 259.13 | 16.42 | 15.81 | 14.99 | 14.46 | 0.53 |
| 302.0180 | 106.76 | 17.26 | 20.87 | 21.08 | 20.25 | 1.66 |
| 302.0406 | 99.24  | 17.19 | 15.16 | 13.89 | 15.40 | 1.03 |
| 302.0698 | 277.81 | 16.00 | 13.26 | 12.67 | 14.24 | 0.88 |
| 302.1246 | 38.45  | 18.21 | 13.28 | 13.52 | 15.08 | 1.47 |
| 302.1346 | 57.33  | 17.22 | 17.49 | 17.47 | 16.99 | 0.22 |
| 302.1556 | 67.14  | 9.05  | 14.25 | 11.62 | 13.62 | 1.01 |
| 302.1610 | 25.69  | 14.35 | 16.74 | 15.03 | 17.05 | 0.70 |
| 302.1757 | 29.2   | 15.30 | 18.83 | 17.58 | 18.09 | 1.69 |
| 302.1960 | 27.05  | 19.96 | 20.16 | 20.06 | 19.70 | 0.14 |
| 302.2189 | 23.84  | 18.14 | 18.00 | 16.80 | 18.38 | 0.42 |
| 302.2322 | 23.52  | 16.90 | 14.12 | 15.15 | 16.55 | 1.08 |
| 302.3051 | 23.22  | 18.37 | 17.46 | 17.54 | 17.77 | 1.00 |
| 302.5178 | 85.71  | 15.45 | 16.14 | 15.64 | 15.74 | 0.33 |
| 302.5306 | 30.26  | 15.33 | 12.50 | 16.25 | 15.54 | 0.45 |
| 302.6774 | 27.79  | 15.64 | 17.38 | 15.62 | 16.51 | 0.50 |
| 302.7195 | 23.09  | 14.97 | 16.65 | 11.78 | 15.65 | 0.11 |
| 302.7453 | 51.72  | 19.55 | 19.85 | 19.93 | 19.30 | 0.28 |
| 302.8808 | 49.13  | 14.90 | 14.94 | 15.27 | 15.57 | 0.32 |
| 302.8851 | 43.77  | 15.83 | 14.08 | 14.14 | 13.84 | 0.68 |
| 302.9060 | 45.58  | 19.05 | 17.69 | 18.45 | 17.97 | 1.00 |
| 302.9256 | 46.52  | 14.65 | 17.11 | 17.81 | 17.05 | 0.99 |
| 302.9373 | 21.32  | 18.00 | 14.67 | 14.93 | 15.74 | 1.67 |
| 302.9605 | 55.94  | 16.87 | 11.18 | 11.81 | 14.27 | 1.78 |
| 302.9708 | 67.95  | 18.05 | 18.57 | 20.71 | 19.70 | 0.96 |
| 302.9993 | 92.48  | 16.53 | 18.72 | 19.11 | 17.81 | 1.25 |
| 303.0146 | 87.02  | 17.19 | 21.06 | 21.30 | 20.24 | 1.65 |
| 303.0213 | 92.22  | 13.81 | 18.26 | 18.43 | 17.19 | 1.51 |
| 303.0386 | 51.57  | 15.21 | 14.86 | 14.11 | 14.23 | 0.47 |
| 303.0474 | 274.81 | 15.97 | 19.71 | 19.91 | 18.58 | 1.74 |
| 303.1574 | 57.31  | 15.19 | 14.92 | 16.07 | 14.70 | 0.06 |
| 303.1664 | 62.07  | 17.09 | 18.63 | 18.73 | 17.52 | 1.06 |
| 303.1778 | 76.58  | 16.65 | 18.13 | 17.92 | 17.93 | 1.16 |
| 303.1953 | 209    | 16.24 | 10.65 | 8.37  | 11.34 | 1.53 |
| 303.1977 | 26.4   | 17.05 | 16.32 | 17.64 | 16.11 | 0.21 |
| 303.2171 | 22.77  | 14.68 | 16.92 | 18.38 | 17.09 | 1.42 |
| 303.2263 | 22.5   | 14.90 | 17.93 | 13.77 | 16.76 | 0.50 |
| 303.2314 | 24.25  | 22.70 | 20.95 | 21.97 | 22.55 | 0.81 |
| 303.3086 | 22.8   | 15.59 | 13.12 | 13.45 | 14.12 | 1.18 |
| 303.4674 | 307.2  | 15.05 | 15.23 | 14.63 | 14.18 | 0.17 |
| 303.5464 | 257.64 | 13.99 | 13.14 | 15.32 | 13.92 | 0.03 |
| 303.6469 | 27.13  | 18.53 | 23.01 | 21.98 | 22.82 | 1.84 |
| 303.7278 | 22.62  | 16.30 | 15.62 | 12.68 | 16.15 | 0.70 |
| 303.8604 | 44.59  | 15.93 | 16.20 | 15.08 | 16.37 | 0.08 |

|          |        |       |       |       |       |      |
|----------|--------|-------|-------|-------|-------|------|
| 303.8739 | 50.36  | 18.18 | 20.45 | 20.71 | 19.95 | 1.47 |
| 303.9014 | 20.87  | 16.35 | 13.91 | 13.31 | 14.06 | 1.04 |
| 303.9527 | 257.12 | 12.01 | 14.73 | 13.72 | 13.10 | 0.55 |
| 303.9702 | 47.71  | 15.84 | 16.15 | 16.81 | 16.41 | 0.56 |
| 303.9805 | 297.44 | 14.84 | 15.38 | 15.73 | 13.83 | 0.27 |
| 304.0194 | 89.92  | 16.98 | 20.83 | 20.89 | 19.73 | 1.56 |
| 304.0270 | 90.36  | 14.01 | 19.25 | 19.14 | 17.56 | 1.72 |
| 304.0323 | 90.2   | 12.97 | 17.76 | 16.58 | 16.75 | 1.76 |
| 304.0445 | 81.29  | 17.77 | 12.76 | 14.02 | 14.93 | 1.55 |
| 304.0789 | 161.4  | 15.16 | 15.05 | 15.05 | 15.47 | 0.04 |
| 304.1002 | 106.87 | 9.64  | 13.15 | 9.73  | 12.84 | 0.77 |
| 304.1400 | 25.82  | 15.78 | 17.13 | 13.88 | 14.08 | 0.20 |
| 304.1491 | 35.82  | 17.34 | 21.32 | 20.41 | 21.18 | 1.79 |
| 304.1615 | 76     | 17.37 | 19.54 | 19.54 | 19.26 | 1.40 |
| 304.2117 | 27.34  | 20.57 | 22.21 | 21.27 | 20.82 | 0.97 |
| 304.2348 | 24.1   | 20.52 | 18.43 | 19.63 | 20.19 | 0.94 |
| 304.2352 | 174.53 | 18.37 | 16.23 | 16.96 | 16.69 | 1.33 |
| 304.2635 | 163.98 | 17.50 | 16.15 | 14.44 | 16.34 | 1.00 |
| 304.2995 | 22.84  | 17.90 | 16.42 | 16.82 | 17.49 | 0.73 |
| 304.4789 | 121.9  | 12.52 | 14.59 | 13.83 | 12.54 | 0.58 |
| 304.5277 | 85.41  | 15.77 | 17.24 | 17.06 | 16.62 | 1.07 |
| 304.5869 | 93.82  | 17.64 | 11.38 | 12.54 | 12.31 | 1.93 |
| 304.6546 | 27.01  | 17.30 | 21.33 | 20.00 | 20.45 | 1.67 |
| 304.7425 | 49.66  | 20.13 | 20.44 | 20.51 | 19.91 | 0.33 |
| 304.8910 | 304.54 | 14.56 | 16.10 | 13.97 | 14.08 | 0.31 |
| 304.9032 | 48.52  | 17.71 | 15.92 | 16.74 | 16.49 | 1.07 |
| 304.9557 | 60.33  | 21.43 | 18.44 | 18.89 | 20.04 | 1.71 |
| 304.9888 | 94.52  | 17.73 | 19.24 | 19.01 | 18.76 | 0.84 |
| 305.0007 | 283.92 | 17.52 | 15.26 | 15.77 | 16.59 | 0.68 |
| 305.0162 | 69.83  | 17.66 | 19.37 | 19.73 | 18.91 | 1.28 |
| 305.0281 | 88.99  | 17.71 | 20.17 | 19.30 | 19.40 | 1.39 |
| 305.0674 | 67.48  | 14.20 | 14.48 | 15.22 | 15.74 | 0.38 |
| 305.0678 | 267.77 | 11.38 | 13.80 | 13.75 | 13.52 | 0.74 |
| 305.1089 | 113.88 | 15.52 | 16.22 | 16.00 | 15.76 | 0.44 |
| 305.1280 | 62.17  | 15.39 | 14.52 | 16.05 | 13.91 | 0.24 |
| 305.1457 | 87.97  | 16.42 | 17.41 | 17.84 | 17.88 | 0.78 |
| 305.1566 | 36.17  | 17.80 | 19.64 | 18.35 | 19.34 | 1.13 |
| 305.1731 | 45.26  | 16.91 | 12.21 | 11.91 | 11.64 | 1.15 |
| 305.2141 | 29.07  | 17.89 | 19.18 | 18.24 | 17.76 | 0.64 |
| 305.2385 | 24.17  | 16.36 | 12.34 | 14.42 | 15.51 | 1.01 |
| 305.2470 | 28.12  | 22.40 | 20.23 | 21.16 | 21.31 | 1.32 |
| 305.3031 | 22.37  | 14.99 | 12.51 | 13.18 | 14.16 | 0.86 |
| 305.6338 | 27.71  | 15.42 | 16.62 | 17.10 | 14.85 | 0.64 |
| 305.6434 | 27.13  | 15.45 | 17.15 | 15.35 | 17.19 | 0.58 |
| 305.6624 | 27.11  | 16.72 | 20.17 | 18.56 | 19.01 | 1.25 |
| 305.8582 | 44.63  | 14.45 | 14.34 | 13.36 | 15.04 | 0.24 |
| 305.8709 | 49.75  | 15.31 | 17.92 | 18.27 | 17.49 | 1.53 |
| 305.9185 | 117.51 | 14.10 | 18.88 | 13.18 | 18.05 | 0.57 |
| 305.9603 | 54.39  | 22.59 | 22.29 | 22.03 | 21.64 | 0.46 |
| 305.9912 | 261.45 | 14.85 | 14.79 | 15.83 | 14.75 | 0.23 |
| 306.0170 | 90.09  | 13.92 | 17.41 | 17.29 | 16.43 | 1.54 |
| 306.0337 | 84.7   | 13.72 | 17.48 | 17.35 | 15.97 | 1.44 |
| 306.0409 | 42.49  | 12.59 | 9.12  | 10.45 | 15.12 | 0.80 |
| 306.0485 | 280.19 | 17.77 | 18.19 | 18.25 | 18.15 | 0.36 |
| 306.0585 | 119.53 | 10.15 | 13.87 | 11.14 | 13.73 | 1.00 |
| 306.0768 | 218.33 | 19.46 | 21.01 | 21.89 | 21.31 | 0.82 |

|          |        |       |       |       |       |      |
|----------|--------|-------|-------|-------|-------|------|
| 306.0777 | 59.66  | 21.83 | 22.74 | 23.11 | 22.60 | 0.83 |
| 306.0931 | 96.52  | 17.79 | 19.09 | 18.93 | 19.04 | 1.28 |
| 306.1297 | 89.67  | 19.28 | 20.26 | 20.44 | 20.47 | 0.95 |
| 306.1614 | 43.59  | 15.04 | 18.50 | 16.63 | 17.80 | 1.22 |
| 306.2427 | 289.81 | 17.61 | 17.09 | 17.09 | 16.69 | 0.53 |
| 306.2505 | 23.45  | 20.23 | 17.67 | 18.76 | 18.98 | 1.46 |
| 306.2508 | 149.83 | 18.86 | 16.75 | 17.56 | 17.78 | 1.22 |
| 306.5260 | 94.32  | 17.30 | 12.14 | 14.12 | 13.31 | 1.49 |
| 306.5773 | 279.89 | 14.61 | 18.65 | 19.02 | 16.73 | 1.44 |
| 306.6343 | 33.06  | 14.40 | 13.94 | 15.54 | 15.48 | 0.17 |
| 306.7397 | 50.98  | 19.36 | 19.56 | 19.67 | 19.09 | 0.23 |
| 306.7473 | 302.85 | 15.45 | 20.42 | 20.05 | 18.27 | 1.80 |
| 306.8289 | 47.62  | 16.34 | 17.39 | 17.38 | 17.19 | 1.21 |
| 306.8549 | 45.58  | 17.42 | 16.66 | 17.84 | 17.31 | 0.21 |
| 306.8999 | 36.86  | 17.36 | 21.33 | 22.31 | 20.42 | 1.60 |
| 306.9297 | 242.01 | 15.96 | 17.04 | 16.95 | 17.01 | 0.56 |
| 306.9596 | 57.67  | 19.22 | 17.15 | 16.01 | 17.52 | 1.23 |
| 306.9955 | 74.35  | 16.43 | 16.74 | 17.08 | 15.20 | 0.07 |
| 307.0350 | 66.64  | 18.15 | 22.20 | 22.01 | 20.71 | 1.74 |
| 307.0439 | 42.7   | 26.14 | 26.51 | 26.96 | 27.04 | 0.50 |
| 307.0753 | 237.77 | 15.35 | 16.86 | 15.89 | 16.44 | 0.41 |
| 307.0763 | 67.42  | 12.34 | 11.91 | 11.33 | 12.51 | 0.29 |
| 307.0832 | 223.94 | 22.57 | 29.61 | 29.99 | 28.54 | 1.65 |
| 307.1668 | 45.75  | 19.05 | 17.62 | 17.48 | 17.95 | 1.46 |
| 307.1891 | 46.81  | 17.56 | 16.26 | 16.16 | 16.48 | 1.09 |
| 307.1927 | 221.95 | 11.90 | 12.72 | 10.31 | 13.46 | 0.01 |
| 307.2228 | 30.03  | 18.28 | 21.83 | 20.52 | 19.92 | 1.36 |
| 307.2375 | 22.01  | 13.83 | 11.90 | 15.88 | 15.04 | 0.02 |
| 307.2540 | 23.75  | 16.69 | 10.98 | 12.46 | 13.78 | 1.71 |
| 307.2628 | 23.6   | 18.93 | 16.30 | 17.06 | 17.49 | 1.55 |
| 307.2630 | 161.39 | 18.39 | 16.16 | 16.71 | 17.04 | 1.39 |
| 307.4135 | 302.94 | 14.98 | 16.27 | 15.93 | 14.84 | 0.74 |
| 307.5837 | 243.49 | 24.16 | 27.32 | 27.64 | 26.75 | 1.36 |
| 307.7464 | 302.31 | 14.84 | 15.02 | 14.90 | 14.49 | 0.04 |
| 307.9052 | 43.37  | 13.62 | 15.56 | 17.96 | 15.26 | 0.99 |
| 307.9163 | 35.6   | 16.55 | 13.78 | 14.65 | 14.07 | 0.87 |
| 307.9563 | 56.42  | 18.64 | 17.36 | 16.75 | 17.05 | 1.06 |
| 308.0396 | 59.67  | 19.73 | 20.61 | 20.96 | 20.75 | 1.11 |
| 308.0472 | 42.38  | 22.77 | 23.43 | 23.84 | 23.75 | 0.69 |
| 308.0853 | 213.69 | 16.76 | 26.51 | 18.13 | 24.78 | 1.04 |
| 308.1082 | 260.48 | 16.33 | 18.43 | 17.81 | 17.32 | 0.98 |
| 308.2220 | 207.31 | 16.18 | 9.69  | 12.51 | 12.05 | 1.27 |
| 308.2249 | 27.1   | 16.24 | 18.60 | 17.26 | 16.97 | 1.15 |
| 308.2453 | 22.23  | 15.14 | 14.60 | 17.05 | 16.26 | 0.40 |
| 308.2583 | 215.18 | 16.67 | 8.46  | 9.14  | 10.08 | 1.84 |
| 308.2661 | 23.79  | 16.84 | 11.21 | 13.47 | 14.40 | 1.53 |
| 308.5821 | 238.51 | 20.37 | 23.58 | 24.39 | 23.11 | 1.44 |
| 308.5868 | 220.37 | 15.70 | 19.94 | 20.07 | 18.70 | 1.25 |
| 308.6151 | 27.24  | 15.23 | 17.13 | 14.50 | 18.35 | 0.39 |
| 308.6466 | 86.47  | 15.71 | 16.26 | 16.19 | 15.41 | 0.25 |
| 308.7370 | 46.96  | 17.62 | 17.55 | 17.62 | 17.40 | 0.12 |
| 308.7467 | 22.06  | 13.56 | 13.53 | 16.12 | 16.10 | 0.54 |
| 308.8263 | 47.64  | 15.91 | 16.88 | 16.77 | 16.76 | 1.06 |
| 308.8365 | 31.2   | 11.53 | 15.16 | 17.59 | 16.85 | 1.42 |
| 308.8524 | 45.58  | 15.94 | 15.71 | 16.44 | 16.25 | 0.09 |
| 308.8706 | 45.35  | 16.96 | 18.21 | 18.91 | 18.10 | 1.13 |

|          |        |       |       |       |       |      |
|----------|--------|-------|-------|-------|-------|------|
| 308.8783 | 54.01  | 15.70 | 15.71 | 15.77 | 16.14 | 0.07 |
| 308.8978 | 43.65  | 17.38 | 19.10 | 20.02 | 18.36 | 1.37 |
| 308.9148 | 36.57  | 16.03 | 16.26 | 16.76 | 17.02 | 0.40 |
| 308.9349 | 301.15 | 14.56 | 14.00 | 14.51 | 12.36 | 0.36 |
| 308.9444 | 223.7  | 15.75 | 16.33 | 15.19 | 16.12 | 0.05 |
| 308.9533 | 64.57  | 16.94 | 12.42 | 12.24 | 13.51 | 1.52 |
| 309.0057 | 86.97  | 16.32 | 16.22 | 17.26 | 16.92 | 0.32 |
| 309.0137 | 187.73 | 10.80 | 14.42 | 15.44 | 13.36 | 1.37 |
| 309.0144 | 36.46  | 13.53 | 14.49 | 17.05 | 16.12 | 1.01 |
| 309.0347 | 86.01  | 15.69 | 18.86 | 18.89 | 17.66 | 1.74 |
| 309.0421 | 42.33  | 22.21 | 22.78 | 23.21 | 23.11 | 0.71 |
| 309.0478 | 43.49  | 19.35 | 19.62 | 20.08 | 19.98 | 0.69 |
| 309.0818 | 240.35 | 16.36 | 20.93 | 21.67 | 20.10 | 1.63 |
| 309.0886 | 192.92 | 14.78 | 16.10 | 16.85 | 17.06 | 0.74 |
| 309.0942 | 193.54 | 20.36 | 21.49 | 21.60 | 21.58 | 0.77 |
| 309.1122 | 106.86 | 15.22 | 15.60 | 15.69 | 14.81 | 0.22 |
| 309.1292 | 106.9  | 19.95 | 20.85 | 20.92 | 20.48 | 1.35 |
| 309.1508 | 27.46  | 17.83 | 12.65 | 12.96 | 13.75 | 1.86 |
| 309.1655 | 114.58 | 17.97 | 21.38 | 21.17 | 21.30 | 1.41 |
| 309.1826 | 45.14  | 18.68 | 17.40 | 16.93 | 17.15 | 1.53 |
| 309.2058 | 21.79  | 16.70 | 13.60 | 13.90 | 14.80 | 1.65 |
| 309.2060 | 169.84 | 17.61 | 15.41 | 15.39 | 15.74 | 1.59 |
| 309.2270 | 185.39 | 16.36 | 13.57 | 14.47 | 14.66 | 1.30 |
| 309.2784 | 23.93  | 15.40 | 13.88 | 14.21 | 15.01 | 0.44 |
| 309.4072 | 296.31 | 13.66 | 15.20 | 15.27 | 13.37 | 0.65 |
| 309.9032 | 42.89  | 14.60 | 12.34 | 14.67 | 13.58 | 0.70 |
| 309.9154 | 39.6   | 15.15 | 14.79 | 15.51 | 15.07 | 0.03 |
| 309.9313 | 41.23  | 16.17 | 16.31 | 16.36 | 16.55 | 0.20 |
| 309.9400 | 73.48  | 12.35 | 15.23 | 12.49 | 15.67 | 0.58 |
| 309.9745 | 20.05  | 14.35 | 14.53 | 14.04 | 14.56 | 0.00 |
| 309.9995 | 257.42 | 18.15 | 17.99 | 18.41 | 17.90 | 0.02 |
| 309.9999 | 147.06 | 17.76 | 18.46 | 15.96 | 17.77 | 0.12 |
| 310.0383 | 69.06  | 18.37 | 19.09 | 19.80 | 19.31 | 0.86 |
| 310.0454 | 43.69  | 19.17 | 19.30 | 19.85 | 19.81 | 0.52 |
| 310.0511 | 42.97  | 16.40 | 14.84 | 15.51 | 15.88 | 0.98 |
| 310.0580 | 142.99 | 11.45 | 13.40 | 14.48 | 12.57 | 0.65 |
| 310.0866 | 189.65 | 19.01 | 20.32 | 20.44 | 20.09 | 0.77 |
| 310.0952 | 196.36 | 16.54 | 17.99 | 18.22 | 18.11 | 0.97 |
| 310.1132 | 81.56  | 18.90 | 18.83 | 18.97 | 18.97 | 0.01 |
| 310.1327 | 103.98 | 16.59 | 17.13 | 16.67 | 16.69 | 0.40 |
| 310.1689 | 105.54 | 15.80 | 17.71 | 17.24 | 18.14 | 1.20 |
| 310.1760 | 48.35  | 19.93 | 19.58 | 19.67 | 19.78 | 0.43 |
| 310.2009 | 24.61  | 18.25 | 18.24 | 19.97 | 17.24 | 0.30 |
| 310.2739 | 21.77  | 16.09 | 12.12 | 11.70 | 12.90 | 1.58 |
| 310.2740 | 190.47 | 16.84 | 13.84 | 14.41 | 15.02 | 1.51 |
| 310.3103 | 173.63 | 17.00 | 15.30 | 15.24 | 15.73 | 1.37 |
| 310.4626 | 140.71 | 13.67 | 14.91 | 14.48 | 13.27 | 0.29 |
| 310.5502 | 161.69 | 15.87 | 15.49 | 15.88 | 14.58 | 0.19 |
| 310.6260 | 25.01  | 15.06 | 16.95 | 14.07 | 17.16 | 0.29 |
| 310.6635 | 29.17  | 17.86 | 12.58 | 13.72 | 13.80 | 1.61 |
| 310.8286 | 110.16 | 12.31 | 14.47 | 10.59 | 14.36 | 0.28 |
| 310.8426 | 31.53  | 12.83 | 10.35 | 14.56 | 12.52 | 0.17 |
| 310.8680 | 45.18  | 16.17 | 16.94 | 17.73 | 16.81 | 0.84 |
| 310.8756 | 48.57  | 15.13 | 15.64 | 16.08 | 15.83 | 0.57 |
| 310.8930 | 44.15  | 15.45 | 14.85 | 13.96 | 14.09 | 0.64 |
| 310.9112 | 47.74  | 18.10 | 16.58 | 17.67 | 17.14 | 0.88 |

|          |        |       |       |       |       |      |
|----------|--------|-------|-------|-------|-------|------|
| 310.9750 | 68.85  | 21.08 | 21.48 | 21.97 | 21.12 | 0.68 |
| 311.0038 | 75.63  | 16.58 | 16.67 | 15.15 | 16.98 | 0.20 |
| 311.0241 | 65.46  | 18.95 | 18.92 | 20.16 | 19.27 | 0.55 |
| 311.0449 | 58.34  | 16.14 | 14.12 | 14.91 | 15.48 | 0.72 |
| 311.0837 | 66.82  | 16.95 | 16.02 | 15.96 | 15.49 | 0.75 |
| 311.0901 | 197.85 | 14.48 | 15.73 | 15.91 | 16.43 | 0.70 |
| 311.0987 | 64.99  | 16.67 | 17.84 | 17.38 | 16.79 | 0.40 |
| 311.1238 | 55.28  | 17.86 | 17.37 | 17.89 | 17.99 | 0.25 |
| 311.1799 | 43.91  | 17.56 | 17.51 | 17.55 | 17.54 | 0.03 |
| 311.1891 | 25.06  | 12.84 | 15.97 | 11.24 | 15.76 | 0.41 |
| 311.2042 | 23.76  | 15.46 | 14.66 | 16.75 | 15.31 | 0.04 |
| 311.2212 | 284.72 | 19.39 | 17.81 | 17.62 | 17.83 | 0.98 |
| 311.2215 | 20.12  | 17.99 | 14.26 | 14.55 | 15.51 | 1.94 |
| 311.2366 | 23.8   | 18.52 | 15.42 | 17.02 | 17.59 | 1.38 |
| 311.2578 | 23.89  | 18.78 | 15.63 | 15.42 | 16.42 | 1.58 |
| 311.2581 | 170.24 | 17.46 | 14.69 | 14.85 | 15.34 | 1.66 |
| 311.2941 | 23.63  | 14.78 | 13.38 | 13.92 | 14.59 | 0.31 |
| 311.2945 | 200.9  | 15.76 | 12.91 | 13.13 | 14.05 | 0.89 |
| 311.6016 | 83.08  | 15.70 | 18.64 | 18.43 | 18.43 | 1.61 |
| 311.6329 | 27.87  | 18.33 | 11.92 | 12.65 | 13.99 | 1.90 |
| 311.6794 | 29.79  | 15.95 | 18.48 | 18.47 | 17.74 | 1.44 |
| 311.9057 | 51.01  | 19.20 | 20.81 | 21.08 | 20.32 | 1.17 |
| 311.9797 | 54.54  | 17.10 | 16.08 | 16.32 | 15.67 | 0.69 |
| 312.0154 | 73.55  | 17.59 | 17.54 | 17.72 | 17.46 | 0.01 |
| 312.0288 | 46.59  | 20.62 | 16.76 | 16.60 | 17.00 | 1.52 |
| 312.0904 | 65.36  | 16.17 | 15.68 | 15.45 | 15.34 | 0.42 |
| 312.1029 | 82.88  | 15.53 | 16.44 | 16.28 | 16.51 | 0.68 |
| 312.1163 | 61.7   | 17.31 | 18.02 | 17.97 | 18.37 | 0.61 |
| 312.1351 | 38.25  | 17.25 | 13.26 | 13.38 | 14.29 | 1.74 |
| 312.1803 | 40.26  | 15.10 | 16.58 | 16.88 | 16.03 | 0.63 |
| 312.2167 | 23.58  | 16.54 | 16.06 | 17.51 | 16.66 | 0.09 |
| 312.2251 | 210.42 | 16.50 | 13.76 | 13.04 | 14.63 | 1.09 |
| 312.2398 | 23.43  | 16.19 | 11.33 | 13.37 | 14.28 | 1.56 |
| 312.2532 | 176.58 | 17.92 | 15.87 | 15.93 | 16.29 | 1.35 |
| 312.3258 | 281.64 | 17.55 | 16.10 | 15.88 | 16.22 | 1.00 |
| 312.3259 | 20.92  | 16.34 | 14.28 | 13.48 | 14.44 | 1.42 |
| 312.3261 | 178.31 | 17.57 | 15.51 | 15.29 | 16.07 | 1.55 |
| 312.6408 | 28.63  | 17.34 | 12.48 | 12.93 | 13.27 | 2.00 |
| 312.6532 | 25.79  | 15.23 | 18.63 | 13.07 | 13.29 | 0.20 |
| 312.6628 | 30.82  | 15.22 | 14.57 | 17.10 | 16.84 | 0.28 |
| 312.7742 | 51.39  | 17.06 | 18.04 | 18.11 | 17.67 | 0.91 |
| 312.7822 | 51.88  | 16.77 | 16.24 | 16.09 | 16.57 | 0.36 |
| 312.8661 | 45.34  | 13.79 | 13.21 | 14.04 | 13.03 | 0.15 |
| 312.9093 | 47.48  | 16.70 | 16.75 | 17.89 | 17.39 | 0.58 |
| 312.9634 | 72.88  | 16.36 | 17.01 | 16.35 | 16.32 | 0.17 |
| 312.9709 | 44.21  | 17.57 | 17.67 | 18.19 | 17.14 | 0.24 |
| 312.9800 | 79.93  | 18.05 | 17.94 | 18.81 | 18.94 | 0.37 |
| 312.9864 | 66.96  | 17.31 | 13.60 | 13.03 | 13.77 | 1.45 |
| 313.0110 | 96.84  | 16.49 | 15.52 | 15.81 | 15.24 | 0.40 |
| 313.0229 | 265.22 | 17.38 | 19.46 | 18.36 | 17.79 | 1.01 |
| 313.0291 | 275.18 | 18.49 | 21.48 | 21.93 | 21.16 | 1.71 |
| 313.0518 | 48.61  | 19.32 | 18.77 | 19.83 | 19.68 | 0.02 |
| 313.1119 | 112.68 | 14.05 | 14.63 | 13.85 | 15.14 | 0.30 |
| 313.1433 | 148.7  | 19.73 | 19.31 | 19.53 | 19.49 | 0.20 |
| 313.1550 | 24.94  | 14.99 | 19.53 | 13.83 | 16.90 | 0.63 |
| 313.1857 | 33.33  | 16.60 | 10.15 | 11.55 | 10.77 | 1.25 |

|          |        |       |       |       |       |      |
|----------|--------|-------|-------|-------|-------|------|
| 313.2048 | 27.07  | 14.88 | 17.47 | 13.91 | 17.12 | 0.53 |
| 313.2162 | 217.6  | 16.62 | 13.09 | 13.22 | 12.70 | 1.03 |
| 313.2197 | 23.43  | 12.63 | 11.58 | 13.53 | 12.70 | 0.08 |
| 313.2371 | 287.85 | 18.84 | 17.07 | 17.28 | 16.80 | 1.14 |
| 313.2371 | 21.3   | 17.41 | 13.57 | 14.07 | 15.08 | 1.94 |
| 313.2523 | 23.51  | 16.98 | 13.93 | 14.03 | 14.91 | 1.39 |
| 313.2734 | 24.26  | 20.41 | 18.28 | 18.37 | 18.83 | 1.51 |
| 313.2735 | 185.68 | 21.27 | 18.90 | 18.34 | 19.21 | 1.04 |
| 313.5240 | 257.1  | 15.50 | 15.24 | 15.16 | 15.00 | 0.24 |
| 313.5319 | 296.28 | 12.67 | 16.75 | 15.66 | 15.17 | 1.15 |
| 313.6705 | 34.49  | 15.68 | 16.48 | 17.49 | 15.34 | 0.34 |
| 313.8814 | 255.18 | 17.83 | 15.69 | 15.01 | 16.08 | 1.06 |
| 313.8815 | 109.09 | 18.75 | 15.84 | 17.23 | 16.12 | 1.17 |
| 313.8898 | 44.38  | 14.84 | 16.50 | 15.27 | 16.59 | 0.79 |
| 313.9027 | 50.77  | 17.87 | 19.33 | 19.66 | 18.84 | 1.01 |
| 313.9970 | 50.9   | 17.58 | 16.03 | 16.17 | 16.43 | 1.23 |
| 314.0305 | 54.9   | 17.14 | 9.97  | 11.46 | 12.33 | 1.65 |
| 314.0329 | 276.91 | 10.72 | 16.10 | 17.33 | 15.70 | 1.73 |
| 314.0551 | 47.81  | 16.49 | 14.91 | 15.17 | 15.57 | 0.69 |
| 314.0750 | 91.74  | 16.63 | 18.38 | 18.32 | 18.64 | 1.13 |
| 314.0847 | 55.84  | 17.75 | 18.10 | 18.07 | 17.70 | 0.43 |
| 314.0908 | 214.16 | 14.15 | 17.79 | 19.24 | 17.45 | 1.43 |
| 314.1035 | 280.68 | 16.49 | 20.29 | 20.22 | 19.35 | 1.69 |
| 314.1113 | 123.16 | 15.09 | 15.22 | 13.22 | 15.29 | 0.48 |
| 314.1466 | 288.99 | 17.54 | 16.74 | 16.81 | 16.55 | 0.69 |
| 314.1719 | 59.44  | 14.22 | 14.52 | 15.64 | 15.21 | 0.22 |
| 314.2182 | 22.69  | 15.60 | 15.90 | 13.69 | 15.59 | 0.29 |
| 314.2323 | 24.11  | 18.95 | 19.06 | 19.28 | 19.16 | 0.22 |
| 314.2407 | 207.9  | 15.98 | 11.21 | 12.71 | 11.81 | 0.96 |
| 314.2690 | 167.41 | 17.18 | 14.87 | 14.88 | 15.99 | 1.48 |
| 314.2766 | 292.36 | 18.92 | 17.38 | 17.62 | 17.09 | 0.76 |
| 314.2767 | 23.28  | 18.19 | 15.00 | 15.45 | 15.89 | 1.75 |
| 314.5265 | 64.86  | 15.07 | 15.86 | 16.23 | 15.92 | 0.68 |
| 314.5360 | 86.57  | 14.89 | 16.03 | 15.75 | 15.55 | 0.70 |
| 314.5929 | 212.69 | 13.23 | 14.01 | 14.39 | 14.51 | 0.41 |
| 314.6053 | 280.65 | 15.15 | 17.55 | 17.44 | 16.75 | 1.38 |
| 314.7714 | 46.76  | 17.51 | 18.24 | 18.32 | 17.90 | 1.25 |
| 314.7792 | 51.2   | 17.13 | 16.85 | 16.62 | 17.05 | 0.23 |
| 314.8158 | 44.51  | 17.38 | 17.60 | 18.16 | 17.25 | 0.35 |
| 314.8642 | 19.51  | 16.03 | 9.78  | 11.14 | 11.01 | 1.70 |
| 314.9425 | 42.21  | 14.02 | 12.33 | 16.22 | 14.22 | 0.02 |
| 314.9761 | 305.03 | 14.75 | 16.25 | 15.72 | 14.40 | 0.81 |
| 315.0173 | 40.7   | 16.69 | 15.20 | 15.33 | 14.79 | 0.84 |
| 315.0611 | 71.61  | 17.32 | 18.49 | 18.40 | 18.35 | 0.85 |
| 315.0800 | 282.66 | 14.74 | 17.93 | 17.94 | 16.77 | 1.55 |
| 315.1305 | 47.17  | 17.23 | 17.90 | 17.65 | 18.01 | 0.38 |
| 315.1497 | 64.06  | 17.26 | 15.82 | 16.39 | 15.71 | 0.63 |
| 315.1540 | 269.61 | 17.73 | 13.47 | 10.87 | 15.51 | 1.35 |
| 315.1966 | 29.41  | 16.68 | 12.82 | 13.71 | 13.65 | 1.15 |
| 315.2262 | 22.51  | 16.74 | 18.89 | 17.26 | 18.47 | 0.94 |
| 315.2317 | 206.51 | 16.71 | 13.42 | 13.47 | 13.84 | 1.19 |
| 315.2346 | 23.77  | 16.20 | 15.28 | 15.96 | 15.88 | 0.32 |
| 315.6822 | 59.38  | 15.17 | 14.64 | 15.34 | 14.22 | 0.13 |
| 315.7278 | 22.46  | 15.94 | 17.50 | 15.82 | 17.07 | 0.46 |
| 315.9062 | 99.9   | 13.84 | 15.24 | 14.28 | 15.17 | 0.49 |
| 315.9149 | 95.99  | 16.08 | 16.64 | 16.80 | 16.39 | 0.49 |

|          |        |       |       |       |       |      |
|----------|--------|-------|-------|-------|-------|------|
| 315.9305 | 44.3   | 16.11 | 14.75 | 15.09 | 14.65 | 0.87 |
| 315.9453 | 44.22  | 16.15 | 15.92 | 15.50 | 16.07 | 0.37 |
| 315.9530 | 41.64  | 16.92 | 16.21 | 16.15 | 16.39 | 0.71 |
| 316.0341 | 64.41  | 16.08 | 16.71 | 16.62 | 16.94 | 0.55 |
| 316.0555 | 67.76  | 18.16 | 18.89 | 18.26 | 19.24 | 0.33 |
| 316.0640 | 81.55  | 15.79 | 17.16 | 16.82 | 17.14 | 1.00 |
| 316.2116 | 24.33  | 16.79 | 15.09 | 15.64 | 15.26 | 1.00 |
| 316.2340 | 25.68  | 17.89 | 19.90 | 18.29 | 19.74 | 0.95 |
| 316.2479 | 23.61  | 18.87 | 19.42 | 19.61 | 19.51 | 0.56 |
| 316.2843 | 21.86  | 16.01 | 10.82 | 12.01 | 11.74 | 1.41 |
| 316.6352 | 106.35 | 13.89 | 15.82 | 12.64 | 15.41 | 0.26 |
| 316.6591 | 110.17 | 12.42 | 14.74 | 14.84 | 14.44 | 0.96 |
| 316.6652 | 27.09  | 15.66 | 17.08 | 16.54 | 14.63 | 0.41 |
| 316.7355 | 22.45  | 16.73 | 18.36 | 17.40 | 18.24 | 0.94 |
| 316.7687 | 46.57  | 16.25 | 16.80 | 16.70 | 16.32 | 0.68 |
| 316.7762 | 51.59  | 16.67 | 15.89 | 15.73 | 16.43 | 0.49 |
| 316.7859 | 45.22  | 15.73 | 12.51 | 15.55 | 13.04 | 0.77 |
| 316.7962 | 19.95  | 16.59 | 11.34 | 11.91 | 12.28 | 1.99 |
| 316.8131 | 44.57  | 17.08 | 17.33 | 17.88 | 16.76 | 0.28 |
| 316.8366 | 119.21 | 12.35 | 13.78 | 10.32 | 14.03 | 0.06 |
| 316.8585 | 42.26  | 15.25 | 15.66 | 15.86 | 15.91 | 0.43 |
| 316.8820 | 27.36  | 14.51 | 14.28 | 15.38 | 15.77 | 0.15 |
| 316.9071 | 90.38  | 15.98 | 21.57 | 21.70 | 20.18 | 1.52 |
| 316.9384 | 49.33  | 14.98 | 15.68 | 17.42 | 16.55 | 0.95 |
| 316.9397 | 306.28 | 11.73 | 18.21 | 16.50 | 14.37 | 1.76 |
| 316.9493 | 38.07  | 17.59 | 17.25 | 17.05 | 16.72 | 0.46 |
| 316.9829 | 53.84  | 24.24 | 25.33 | 25.19 | 24.56 | 0.82 |
| 316.9941 | 274.88 | 19.22 | 19.63 | 19.84 | 19.60 | 0.39 |
| 317.0292 | 54.74  | 16.40 | 17.17 | 17.48 | 16.89 | 0.83 |
| 317.0388 | 60.69  | 16.58 | 14.78 | 15.29 | 15.05 | 0.76 |
| 317.0529 | 234.26 | 15.34 | 15.64 | 16.71 | 15.39 | 0.41 |
| 317.1093 | 39.13  | 15.47 | 16.06 | 13.72 | 16.30 | 0.11 |
| 317.1476 | 45.75  | 15.89 | 16.95 | 15.00 | 14.54 | 0.02 |
| 317.1790 | 26.04  | 15.26 | 18.05 | 14.81 | 18.32 | 0.72 |
| 317.2107 | 27.17  | 20.74 | 18.78 | 19.78 | 20.43 | 0.89 |
| 317.2371 | 22.74  | 14.31 | 14.26 | 11.54 | 13.99 | 0.51 |
| 317.2419 | 22.71  | 15.82 | 16.65 | 13.94 | 16.95 | 0.07 |
| 317.2501 | 23.79  | 16.57 | 15.72 | 16.54 | 16.44 | 0.25 |
| 317.5433 | 240.01 | 16.11 | 16.75 | 17.84 | 16.53 | 0.41 |
| 317.6213 | 88.44  | 16.60 | 17.09 | 17.77 | 17.18 | 0.59 |
| 317.7435 | 22.46  | 15.38 | 15.09 | 11.16 | 15.38 | 0.58 |
| 317.8509 | 50.36  | 19.28 | 19.90 | 20.26 | 19.53 | 0.60 |
| 317.9079 | 85.34  | 13.65 | 18.12 | 18.25 | 16.69 | 1.49 |
| 317.9496 | 60.64  | 16.07 | 13.36 | 13.72 | 15.02 | 0.87 |
| 317.9809 | 52.89  | 17.40 | 18.21 | 17.96 | 17.55 | 0.74 |
| 317.9864 | 53.94  | 19.79 | 20.54 | 20.48 | 19.90 | 0.78 |
| 317.9977 | 88.86  | 17.32 | 17.35 | 17.60 | 17.43 | 0.14 |
| 318.0255 | 61.71  | 18.84 | 17.01 | 17.60 | 17.72 | 1.08 |
| 318.0480 | 39.23  | 15.02 | 13.35 | 16.45 | 13.59 | 0.19 |
| 318.0538 | 290    | 17.80 | 20.98 | 20.97 | 19.62 | 1.59 |
| 318.0658 | 246.64 | 15.82 | 17.97 | 19.53 | 18.91 | 0.83 |
| 318.1293 | 114.93 | 14.78 | 14.70 | 14.61 | 14.74 | 0.07 |
| 318.1904 | 28.5   | 17.32 | 17.42 | 17.07 | 17.36 | 0.05 |
| 318.2141 | 26.68  | 18.50 | 15.68 | 16.79 | 17.82 | 0.91 |
| 318.2281 | 23.75  | 15.94 | 15.79 | 16.22 | 15.52 | 0.03 |
| 318.5133 | 84.63  | 14.72 | 16.74 | 16.12 | 16.15 | 0.93 |



|          |        |       |       |       |       |      |
|----------|--------|-------|-------|-------|-------|------|
| 318.5556 | 293.47 | 15.36 | 18.29 | 18.33 | 16.88 | 1.31 |
| 318.5692 | 237.28 | 15.77 | 18.27 | 18.56 | 17.59 | 1.36 |
| 318.6890 | 50.45  | 15.63 | 15.73 | 16.29 | 15.71 | 0.17 |
| 318.7191 | 46.26  | 19.66 | 19.80 | 19.97 | 19.28 | 0.12 |
| 318.7834 | 45.08  | 14.27 | 10.74 | 14.56 | 12.13 | 0.70 |
| 318.7918 | 30.45  | 18.67 | 8.97  | 9.59  | 10.62 | 2.04 |
| 318.8107 | 44.58  | 15.70 | 15.08 | 15.60 | 15.20 | 0.30 |
| 318.8549 | 47.65  | 14.58 | 14.49 | 15.18 | 14.90 | 0.15 |
| 318.8995 | 45.49  | 16.26 | 16.46 | 17.24 | 17.00 | 0.43 |
| 318.9078 | 57.6   | 16.70 | 18.58 | 18.73 | 18.50 | 1.39 |
| 318.9243 | 42.75  | 15.23 | 18.42 | 17.46 | 17.89 | 1.54 |
| 318.9407 | 40.47  | 17.21 | 17.03 | 17.53 | 17.56 | 0.10 |
| 318.9765 | 68.69  | 20.62 | 21.79 | 21.69 | 21.13 | 1.04 |
| 318.9862 | 56.27  | 18.02 | 18.48 | 18.36 | 18.22 | 0.61 |
| 319.0286 | 62.12  | 19.53 | 18.47 | 18.56 | 18.06 | 0.86 |
| 319.0457 | 62.22  | 16.46 | 16.33 | 16.47 | 15.44 | 0.12 |
| 319.0621 | 300.71 | 16.28 | 16.99 | 15.92 | 17.84 | 0.28 |
| 319.0649 | 67.8   | 12.77 | 11.61 | 11.94 | 12.17 | 0.41 |
| 319.1243 | 102.61 | 15.19 | 17.12 | 17.33 | 16.80 | 1.17 |
| 319.1613 | 92.5   | 16.44 | 18.34 | 18.33 | 17.91 | 1.52 |
| 319.1943 | 28.97  | 18.31 | 22.03 | 20.63 | 21.84 | 1.73 |
| 319.2251 | 39.93  | 20.22 | 18.16 | 18.58 | 19.30 | 1.41 |
| 319.2374 | 22.07  | 14.67 | 12.27 | 16.06 | 14.05 | 0.33 |
| 319.3958 | 301.91 | 14.46 | 15.01 | 14.44 | 13.78 | 0.09 |
| 319.5902 | 84.31  | 18.64 | 15.94 | 17.34 | 16.83 | 0.98 |
| 319.6706 | 28.97  | 17.40 | 20.24 | 20.05 | 19.67 | 1.58 |
| 319.8480 | 52.13  | 19.00 | 19.49 | 19.90 | 19.30 | 0.56 |
| 319.9161 | 44.82  | 16.10 | 15.50 | 15.77 | 16.15 | 0.28 |
| 319.9438 | 46.35  | 15.80 | 16.00 | 15.95 | 15.75 | 0.13 |
| 319.9543 | 305.53 | 15.79 | 14.22 | 12.20 | 14.34 | 0.96 |
| 319.9815 | 52.52  | 16.46 | 16.31 | 16.17 | 15.73 | 0.27 |
| 319.9968 | 266.8  | 17.76 | 18.06 | 17.61 | 17.38 | 0.02 |
| 320.0051 | 84.99  | 15.72 | 19.72 | 19.45 | 18.67 | 1.66 |
| 320.0326 | 288.15 | 15.03 | 17.14 | 17.08 | 16.49 | 0.87 |
| 320.0755 | 45.28  | 15.25 | 15.84 | 15.40 | 15.51 | 0.28 |
| 320.1088 | 84     | 15.61 | 17.24 | 17.44 | 17.14 | 1.11 |
| 320.1723 | 28.94  | 15.94 | 18.30 | 18.22 | 17.55 | 1.16 |
| 320.1976 | 25.78  | 16.43 | 19.34 | 17.65 | 19.14 | 1.31 |
| 320.2219 | 210.93 | 16.44 | 11.44 | 12.11 | 12.52 | 1.79 |
| 320.2288 | 36.89  | 17.13 | 13.67 | 15.16 | 15.97 | 0.97 |
| 320.2452 | 22.33  | 15.06 | 16.47 | 18.42 | 17.33 | 1.47 |
| 320.5344 | 280.77 | 16.58 | 18.16 | 18.33 | 17.14 | 0.76 |
| 320.7164 | 45.75  | 20.30 | 20.45 | 20.61 | 19.98 | 0.18 |
| 320.7466 | 22.27  | 14.69 | 14.46 | 17.37 | 16.61 | 0.55 |
| 320.8705 | 21.94  | 16.84 | 13.36 | 13.89 | 14.84 | 1.50 |
| 320.8780 | 41.59  | 17.23 | 13.24 | 14.52 | 13.70 | 1.18 |
| 320.8976 | 43.37  | 14.38 | 13.96 | 14.29 | 14.24 | 0.12 |
| 320.9075 | 24.34  | 14.55 | 13.34 | 13.90 | 13.96 | 0.55 |
| 320.9214 | 31.18  | 15.13 | 15.62 | 16.07 | 15.52 | 0.41 |
| 320.9892 | 41.21  | 18.55 | 19.93 | 20.03 | 20.20 | 1.24 |
| 320.9919 | 96.7   | 18.37 | 18.24 | 18.95 | 18.26 | 0.12 |
| 321.0009 | 90.47  | 17.14 | 18.19 | 17.59 | 17.72 | 0.70 |
| 321.0072 | 72.61  | 12.69 | 14.07 | 12.98 | 14.10 | 0.32 |
| 321.0212 | 199.32 | 15.13 | 15.95 | 16.51 | 16.90 | 0.78 |
| 321.0537 | 136.56 | 15.83 | 16.96 | 17.44 | 15.34 | 0.61 |
| 321.1309 | 32     | 18.66 | 19.24 | 18.86 | 19.88 | 0.47 |

|          |        |       |       |       |       |      |
|----------|--------|-------|-------|-------|-------|------|
| 321.1462 | 41.68  | 16.69 | 12.40 | 12.98 | 14.81 | 1.46 |
| 321.2086 | 29.26  | 17.19 | 20.34 | 18.69 | 20.14 | 1.52 |
| 321.2402 | 48.36  | 20.13 | 18.50 | 18.84 | 18.70 | 1.63 |
| 321.2530 | 22.25  | 13.44 | 14.19 | 16.71 | 15.98 | 0.80 |
| 321.7544 | 22.06  | 14.25 | 13.40 | 15.93 | 15.59 | 0.19 |
| 321.8449 | 49.89  | 16.87 | 17.48 | 17.53 | 16.79 | 0.33 |
| 321.8924 | 110.94 | 14.17 | 19.11 | 14.03 | 18.60 | 0.75 |
| 321.9231 | 96.32  | 13.20 | 17.49 | 12.86 | 16.76 | 0.75 |
| 321.9345 | 53.29  | 21.69 | 21.31 | 21.67 | 20.75 | 0.32 |
| 321.9401 | 134.84 | 12.83 | 13.05 | 10.94 | 13.54 | 0.29 |
| 321.9918 | 41.03  | 15.38 | 15.20 | 14.92 | 16.09 | 0.08 |
| 321.9997 | 272.54 | 13.60 | 17.41 | 18.01 | 16.33 | 1.46 |
| 322.0113 | 111.71 | 17.14 | 18.58 | 17.52 | 17.71 | 0.67 |
| 322.0284 | 258.46 | 13.98 | 16.70 | 19.87 | 16.87 | 1.14 |
| 322.0548 | 46.04  | 22.72 | 23.00 | 23.50 | 22.78 | 0.35 |
| 322.0639 | 140.12 | 14.47 | 16.97 | 15.85 | 14.46 | 0.50 |
| 322.1068 | 69.33  | 19.76 | 21.16 | 20.93 | 20.84 | 0.89 |
| 322.1245 | 99.49  | 13.15 | 15.10 | 14.71 | 15.56 | 0.73 |
| 322.1872 | 53.48  | 13.29 | 15.27 | 14.10 | 14.23 | 0.47 |
| 322.2132 | 24.62  | 15.36 | 17.31 | 16.01 | 17.33 | 0.80 |
| 322.2377 | 215.95 | 16.34 | 10.75 | 11.90 | 12.50 | 1.71 |
| 322.2433 | 51.84  | 17.43 | 15.19 | 16.79 | 16.30 | 0.73 |
| 322.2737 | 22.77  | 14.88 | 8.50  | 8.20  | 11.87 | 1.50 |
| 322.5379 | 89.02  | 14.58 | 16.16 | 15.93 | 15.16 | 0.78 |
| 322.5556 | 273.99 | 12.11 | 17.29 | 17.14 | 15.83 | 1.50 |
| 322.6308 | 23.51  | 15.80 | 18.70 | 16.29 | 18.68 | 0.72 |
| 322.7137 | 45.99  | 19.65 | 19.68 | 19.87 | 19.26 | 0.05 |
| 322.8028 | 51.62  | 15.59 | 16.32 | 16.28 | 16.23 | 0.99 |
| 322.8109 | 48.6   | 16.63 | 16.79 | 16.66 | 17.10 | 0.12 |
| 322.8289 | 44.09  | 18.78 | 18.64 | 18.98 | 18.61 | 0.03 |
| 322.9360 | 48.91  | 17.28 | 16.48 | 16.18 | 16.02 | 0.66 |
| 322.9528 | 86.82  | 15.69 | 17.48 | 17.90 | 16.97 | 0.85 |
| 322.9688 | 113.7  | 15.70 | 17.44 | 13.58 | 16.41 | 0.06 |
| 322.9878 | 41.22  | 15.14 | 15.95 | 16.47 | 16.77 | 0.68 |
| 322.9923 | 301.9  | 16.39 | 19.24 | 19.72 | 16.91 | 1.17 |
| 323.0051 | 51.63  | 18.06 | 16.31 | 16.45 | 16.58 | 1.17 |
| 323.0146 | 102.86 | 20.25 | 23.00 | 22.36 | 21.67 | 1.22 |
| 323.0273 | 51.35  | 14.87 | 11.39 | 15.37 | 12.94 | 0.69 |
| 323.0381 | 54.37  | 19.74 | 19.62 | 19.45 | 19.44 | 0.30 |
| 323.0555 | 48.56  | 19.87 | 19.64 | 20.21 | 19.56 | 0.03 |
| 323.0695 | 191.92 | 11.63 | 15.94 | 15.76 | 15.71 | 1.40 |
| 323.1096 | 61.05  | 16.97 | 17.65 | 17.31 | 17.59 | 0.40 |
| 323.1449 | 97.87  | 18.48 | 18.81 | 18.77 | 18.50 | 0.50 |
| 323.1618 | 44.84  | 17.45 | 16.04 | 16.58 | 16.28 | 0.85 |
| 323.2055 | 62.13  | 14.29 | 14.64 | 14.81 | 15.03 | 0.21 |
| 323.2174 | 44.2   | 17.48 | 14.65 | 15.90 | 15.59 | 1.13 |
| 323.2254 | 24.14  | 14.77 | 17.48 | 16.92 | 16.96 | 1.33 |
| 323.2577 | 23.53  | 16.36 | 12.13 | 13.83 | 15.00 | 1.22 |
| 323.6091 | 84.95  | 15.70 | 17.62 | 16.53 | 16.46 | 0.97 |
| 323.6600 | 31.46  | 16.95 | 18.51 | 18.11 | 17.16 | 0.71 |
| 323.7392 | 23.14  | 13.80 | 13.84 | 11.03 | 14.70 | 0.36 |
| 323.8902 | 101.67 | 13.15 | 13.49 | 9.98  | 14.12 | 0.35 |
| 323.9321 | 53.14  | 18.00 | 17.30 | 17.42 | 17.00 | 0.67 |
| 324.0190 | 287.26 | 15.68 | 16.27 | 16.76 | 16.67 | 0.56 |
| 324.0220 | 81.87  | 16.37 | 12.08 | 10.12 | 11.98 | 1.41 |
| 324.0330 | 48.59  | 17.14 | 15.12 | 15.73 | 16.21 | 0.92 |

|          |        |       |       |       |       |      |
|----------|--------|-------|-------|-------|-------|------|
| 324.0451 | 244.18 | 16.39 | 18.26 | 17.72 | 18.33 | 1.21 |
| 324.0530 | 46.16  | 18.93 | 17.95 | 18.67 | 18.27 | 0.39 |
| 324.0589 | 257.51 | 21.81 | 24.32 | 24.33 | 23.51 | 1.73 |
| 324.1021 | 56.86  | 15.28 | 15.20 | 14.73 | 15.28 | 0.13 |
| 324.1108 | 78.51  | 15.57 | 15.40 | 13.86 | 15.66 | 0.34 |
| 324.1404 | 26.46  | 15.38 | 18.25 | 17.53 | 18.05 | 1.31 |
| 324.1625 | 32.67  | 16.11 | 14.07 | 16.05 | 15.48 | 0.47 |
| 324.2893 | 23.77  | 17.46 | 14.02 | 15.03 | 15.77 | 1.65 |
| 324.6532 | 25.37  | 15.95 | 17.61 | 14.34 | 14.49 | 0.02 |
| 324.7113 | 46.04  | 18.25 | 17.87 | 18.09 | 17.46 | 0.40 |
| 324.8005 | 44.34  | 16.03 | 16.47 | 16.44 | 16.14 | 0.48 |
| 324.8080 | 48.62  | 16.96 | 17.27 | 17.18 | 17.53 | 0.25 |
| 324.8265 | 44.11  | 17.94 | 17.63 | 18.02 | 17.76 | 0.21 |
| 324.8366 | 31.1   | 15.09 | 12.41 | 16.97 | 16.00 | 0.18 |
| 324.8446 | 44.52  | 17.33 | 18.59 | 19.15 | 18.20 | 1.13 |
| 324.8525 | 47.9   | 15.50 | 16.73 | 16.88 | 16.62 | 1.18 |
| 324.8918 | 23.43  | 18.75 | 14.33 | 16.69 | 15.93 | 1.39 |
| 324.9617 | 36.4   | 15.96 | 17.92 | 17.35 | 17.05 | 1.39 |
| 325.0052 | 66.81  | 17.47 | 15.36 | 14.50 | 15.42 | 0.94 |
| 325.0201 | 63.43  | 17.25 | 16.05 | 16.34 | 15.67 | 0.96 |
| 325.0428 | 265.31 | 17.59 | 22.09 | 21.19 | 20.58 | 1.29 |
| 325.0561 | 45.83  | 15.11 | 12.97 | 14.36 | 13.76 | 0.63 |
| 325.0564 | 256.16 | 13.20 | 15.77 | 16.17 | 14.79 | 1.32 |
| 325.0564 | 146.12 | 11.06 | 15.19 | 15.50 | 14.93 | 1.41 |
| 325.0621 | 263.81 | 18.35 | 19.79 | 19.73 | 18.91 | 1.32 |
| 325.0926 | 96.69  | 17.76 | 20.95 | 20.96 | 19.97 | 1.75 |
| 325.1117 | 122.32 | 17.75 | 18.22 | 18.20 | 17.08 | 0.14 |
| 325.1126 | 248.56 | 14.09 | 17.46 | 17.71 | 16.51 | 1.14 |
| 325.1602 | 246.75 | 17.96 | 18.77 | 19.09 | 16.61 | 0.24 |
| 325.2008 | 23.78  | 14.77 | 14.70 | 16.52 | 15.58 | 0.28 |
| 325.2159 | 24.14  | 16.57 | 12.22 | 13.92 | 14.64 | 1.17 |
| 325.2372 | 219.56 | 16.54 | 12.88 | 13.91 | 14.40 | 0.89 |
| 325.2736 | 214.83 | 15.91 | 12.04 | 13.25 | 13.28 | 0.76 |
| 325.2917 | 294.04 | 19.52 | 18.86 | 18.83 | 18.72 | 0.41 |
| 325.3097 | 24.29  | 15.34 | 7.20  | 7.81  | 7.89  | 1.78 |
| 325.5137 | 298.99 | 15.65 | 15.77 | 15.82 | 15.18 | 0.03 |
| 325.5482 | 89.21  | 14.54 | 16.21 | 16.43 | 14.82 | 0.88 |
| 325.6103 | 97.54  | 21.07 | 16.63 | 18.27 | 17.06 | 1.51 |
| 325.6887 | 27.71  | 15.76 | 18.16 | 14.28 | 14.78 | 0.22 |
| 325.8879 | 56.09  | 16.80 | 14.13 | 15.18 | 14.62 | 0.87 |
| 325.9595 | 44.83  | 15.60 | 14.73 | 15.40 | 15.40 | 0.41 |
| 325.9873 | 50.17  | 16.57 | 17.15 | 17.61 | 17.17 | 0.76 |
| 326.0118 | 80.66  | 18.03 | 16.79 | 15.73 | 18.25 | 0.73 |
| 326.0468 | 169.67 | 14.04 | 19.45 | 19.09 | 17.74 | 1.63 |
| 326.0566 | 237.55 | 22.31 | 23.22 | 24.68 | 22.93 | 0.70 |
| 326.0637 | 142.72 | 14.93 | 16.48 | 16.86 | 15.68 | 0.98 |
| 326.0851 | 83.44  | 17.92 | 19.79 | 19.42 | 20.16 | 1.20 |
| 326.0959 | 89.21  | 15.01 | 15.91 | 15.68 | 15.13 | 0.60 |
| 326.1097 | 99.13  | 19.28 | 18.78 | 19.12 | 19.01 | 0.31 |
| 326.1639 | 152.93 | 17.11 | 20.24 | 19.58 | 19.36 | 1.48 |
| 326.1711 | 56.67  | 15.59 | 15.79 | 15.93 | 16.41 | 0.22 |
| 326.1960 | 23.67  | 14.30 | 11.92 | 14.49 | 11.32 | 0.43 |
| 326.2072 | 31.12  | 17.25 | 17.11 | 16.88 | 16.78 | 0.21 |
| 326.2185 | 22.98  | 15.11 | 15.97 | 13.67 | 16.09 | 0.01 |
| 326.2689 | 225.36 | 16.78 | 11.61 | 11.30 | 12.71 | 1.35 |
| 326.2955 | 216.73 | 17.43 | 14.93 | 14.87 | 15.20 | 1.47 |

|          |        |       |       |       |       |      |
|----------|--------|-------|-------|-------|-------|------|
| 326.3049 | 23.77  | 18.42 | 15.81 | 16.81 | 17.10 | 1.51 |
| 326.3052 | 160.24 | 18.16 | 15.94 | 15.76 | 16.17 | 1.47 |
| 326.3778 | 22.53  | 17.23 | 12.42 | 13.70 | 15.31 | 1.31 |
| 326.5583 | 238.18 | 20.33 | 22.06 | 22.94 | 21.60 | 1.09 |
| 326.6600 | 29.07  | 15.90 | 17.74 | 19.25 | 18.56 | 1.29 |
| 326.6784 | 28.88  | 15.85 | 14.81 | 17.62 | 16.78 | 0.15 |
| 326.6965 | 27.57  | 16.19 | 20.34 | 14.96 | 16.21 | 0.65 |
| 326.7658 | 43.57  | 13.89 | 14.23 | 13.95 | 14.73 | 0.21 |
| 326.7976 | 44.82  | 14.92 | 14.59 | 14.26 | 14.47 | 0.46 |
| 326.8049 | 48.5   | 15.98 | 15.76 | 15.59 | 16.18 | 0.16 |
| 326.8149 | 44.8   | 15.64 | 16.10 | 17.59 | 16.03 | 0.71 |
| 326.8240 | 46.91  | 15.64 | 14.33 | 15.18 | 15.04 | 0.63 |
| 326.8421 | 44.41  | 16.92 | 17.66 | 18.22 | 17.41 | 0.92 |
| 326.8497 | 47.91  | 14.99 | 16.78 | 17.04 | 16.48 | 1.41 |
| 326.8850 | 45     | 19.06 | 18.17 | 18.48 | 18.00 | 1.05 |
| 326.9482 | 52.94  | 19.66 | 17.38 | 18.49 | 17.44 | 1.23 |
| 326.9780 | 97.56  | 16.07 | 17.73 | 15.00 | 17.38 | 0.29 |
| 326.9944 | 61.81  | 18.84 | 16.42 | 17.05 | 18.05 | 1.64 |
| 327.0078 | 293    | 18.46 | 17.71 | 17.91 | 17.76 | 0.40 |
| 327.0260 | 100.8  | 16.73 | 14.84 | 14.84 | 15.03 | 1.17 |
| 327.0359 | 83.12  | 13.63 | 16.33 | 15.40 | 15.25 | 0.84 |
| 327.0474 | 173.61 | 14.08 | 15.59 | 15.10 | 14.79 | 0.98 |
| 327.0484 | 57.06  | 8.18  | 13.85 | 8.85  | 11.75 | 0.81 |
| 327.0583 | 286.73 | 17.97 | 20.01 | 20.58 | 19.31 | 1.44 |
| 327.0864 | 79.91  | 14.13 | 16.28 | 14.01 | 16.41 | 0.50 |
| 327.1621 | 29.65  | 16.15 | 14.45 | 17.23 | 16.99 | 0.14 |
| 327.1649 | 126.08 | 12.70 | 15.83 | 12.61 | 13.72 | 0.56 |
| 327.1902 | 63.8   | 14.59 | 16.33 | 16.39 | 16.31 | 0.94 |
| 327.2006 | 25.54  | 19.42 | 18.15 | 14.41 | 15.54 | 1.17 |
| 327.2014 | 185.79 | 15.85 | 10.70 | 15.11 | 13.72 | 0.86 |
| 327.2167 | 22.09  | 16.68 | 17.64 | 19.23 | 18.27 | 1.31 |
| 327.2168 | 98.82  | 15.74 | 12.56 | 10.82 | 15.22 | 1.13 |
| 327.2261 | 22.6   | 16.14 | 18.76 | 15.88 | 17.96 | 0.72 |
| 327.2315 | 24.11  | 19.36 | 16.96 | 18.68 | 19.09 | 0.92 |
| 327.2318 | 175.63 | 17.16 | 15.62 | 16.13 | 15.14 | 0.85 |
| 327.2529 | 158.25 | 20.24 | 19.18 | 19.69 | 19.41 | 0.54 |
| 327.2892 | 187.57 | 17.15 | 12.94 | 14.17 | 13.64 | 1.23 |
| 327.3084 | 23.1   | 16.12 | 10.62 | 12.24 | 13.08 | 1.43 |
| 327.5600 | 292.64 | 16.00 | 17.13 | 17.44 | 16.39 | 0.72 |
| 327.5962 | 255.82 | 16.28 | 21.56 | 20.21 | 19.70 | 1.38 |
| 327.7278 | 22.49  | 15.71 | 17.54 | 16.09 | 17.04 | 0.68 |
| 327.8796 | 50.18  | 19.31 | 19.61 | 20.11 | 19.09 | 0.33 |
| 327.9485 | 23.75  | 15.42 | 16.18 | 14.82 | 16.30 | 0.28 |
| 327.9650 | 37.87  | 14.68 | 15.35 | 13.64 | 15.40 | 0.02 |
| 327.9888 | 56.19  | 16.52 | 14.66 | 13.74 | 14.61 | 0.59 |
| 328.0129 | 55.11  | 16.22 | 14.62 | 14.83 | 14.61 | 0.56 |
| 328.0303 | 96.02  | 15.60 | 17.19 | 16.24 | 17.10 | 0.63 |
| 328.0528 | 231.7  | 15.36 | 17.88 | 19.27 | 17.22 | 1.07 |
| 328.0536 | 81.68  | 17.80 | 21.39 | 21.35 | 20.62 | 1.53 |
| 328.0622 | 50.82  | 18.68 | 19.53 | 20.15 | 19.68 | 0.93 |
| 328.0825 | 81.06  | 15.33 | 16.49 | 15.94 | 17.04 | 0.61 |
| 328.0904 | 63.05  | 16.54 | 17.33 | 17.16 | 17.84 | 0.63 |
| 328.0983 | 244.03 | 11.11 | 18.70 | 18.17 | 17.27 | 1.78 |
| 328.1148 | 66.76  | 16.62 | 16.73 | 16.69 | 16.39 | 0.04 |
| 328.1250 | 113.14 | 15.90 | 17.57 | 17.46 | 17.10 | 1.57 |
| 328.2195 | 22.81  | 15.12 | 11.88 | 15.94 | 13.93 | 0.67 |

|          |        |       |       |       |       |      |
|----------|--------|-------|-------|-------|-------|------|
| 328.2337 | 24.65  | 18.80 | 20.82 | 19.52 | 20.64 | 1.09 |
| 328.2478 | 23.52  | 18.18 | 17.17 | 17.30 | 17.96 | 0.49 |
| 328.2560 | 279.29 | 18.41 | 16.11 | 16.20 | 15.84 | 1.17 |
| 328.3206 | 23.8   | 18.75 | 16.69 | 16.92 | 18.34 | 1.23 |
| 328.5943 | 151.6  | 12.03 | 18.18 | 17.07 | 16.90 | 1.64 |
| 328.5943 | 257.97 | 12.10 | 16.12 | 15.24 | 15.31 | 1.25 |
| 328.5997 | 150.22 | 10.46 | 16.20 | 15.00 | 15.28 | 1.46 |
| 328.6652 | 26.99  | 15.84 | 18.96 | 13.98 | 14.03 | 0.23 |
| 328.6709 | 30.77  | 13.15 | 9.82  | 15.22 | 12.92 | 0.24 |
| 328.7023 | 56.12  | 15.51 | 12.91 | 15.95 | 14.18 | 0.50 |
| 328.7350 | 27.59  | 17.14 | 19.61 | 17.95 | 19.18 | 1.13 |
| 328.7482 | 48.02  | 17.51 | 17.96 | 18.11 | 17.62 | 0.76 |
| 328.7561 | 51.1   | 16.72 | 16.48 | 16.15 | 16.68 | 0.28 |
| 328.8125 | 44.76  | 13.01 | 13.49 | 16.51 | 14.17 | 0.59 |
| 328.8399 | 44.46  | 14.55 | 14.28 | 15.07 | 14.47 | 0.04 |
| 328.8466 | 49.22  | 15.25 | 15.52 | 15.28 | 15.62 | 0.12 |
| 328.8829 | 49.05  | 18.61 | 17.56 | 18.37 | 17.43 | 0.82 |
| 328.8907 | 308.74 | 14.47 | 14.08 | 11.89 | 12.72 | 0.92 |
| 328.9163 | 38.95  | 17.77 | 15.36 | 15.76 | 15.84 | 1.24 |
| 328.9347 | 25.29  | 14.80 | 16.29 | 16.03 | 16.22 | 1.02 |
| 328.9473 | 33.02  | 17.05 | 13.02 | 14.21 | 13.18 | 1.16 |
| 328.9584 | 115.78 | 15.85 | 16.71 | 18.35 | 17.70 | 0.82 |
| 328.9691 | 26.67  | 15.21 | 16.73 | 14.82 | 16.14 | 0.40 |
| 328.9942 | 273.11 | 19.73 | 20.65 | 21.40 | 20.25 | 1.13 |
| 329.0044 | 286.96 | 18.73 | 18.32 | 18.82 | 18.46 | 0.16 |
| 329.0272 | 55.8   | 20.10 | 19.42 | 20.34 | 20.30 | 0.20 |
| 329.0382 | 40.58  | 15.83 | 18.36 | 18.23 | 17.45 | 1.71 |
| 329.0559 | 85.32  | 15.71 | 17.73 | 17.68 | 17.37 | 1.59 |
| 329.0670 | 65.34  | 16.33 | 16.33 | 16.94 | 17.64 | 0.30 |
| 329.0838 | 205.42 | 8.41  | 7.23  | 14.88 | 17.72 | 0.68 |
| 329.0857 | 112.26 | 9.59  | 14.58 | 12.41 | 14.22 | 1.35 |
| 329.0962 | 150.19 | 10.40 | 15.27 | 14.01 | 14.05 | 1.36 |
| 329.2163 | 24.47  | 15.03 | 13.40 | 15.90 | 13.90 | 0.29 |
| 329.2339 | 23.29  | 11.59 | 8.91  | 13.09 | 8.65  | 0.24 |
| 329.2471 | 24.38  | 21.41 | 19.06 | 20.39 | 20.42 | 1.35 |
| 329.2686 | 24.96  | 16.71 | 10.28 | 12.98 | 11.34 | 1.26 |
| 329.2686 | 164.67 | 17.52 | 13.24 | 14.94 | 14.11 | 1.37 |
| 329.3240 | 23.44  | 16.52 | 8.78  | 11.40 | 14.20 | 1.39 |
| 329.5398 | 183.99 | 10.54 | 15.61 | 14.69 | 13.69 | 1.46 |
| 329.7435 | 22.44  | 16.41 | 18.42 | 17.14 | 18.24 | 0.91 |
| 329.8769 | 50     | 18.24 | 18.34 | 18.85 | 17.75 | 0.15 |
| 329.9718 | 40.23  | 15.37 | 14.52 | 14.41 | 14.76 | 0.45 |
| 330.0095 | 76.41  | 16.35 | 14.75 | 15.68 | 15.58 | 0.44 |
| 330.0286 | 48.22  | 16.56 | 14.58 | 15.65 | 16.43 | 0.61 |
| 330.0397 | 36.37  | 17.73 | 12.39 | 12.50 | 12.76 | 1.83 |
| 330.0519 | 84.73  | 15.65 | 18.31 | 18.22 | 17.87 | 1.81 |
| 330.0599 | 281.92 | 16.07 | 18.89 | 18.52 | 17.74 | 1.41 |
| 330.0731 | 74.71  | 23.58 | 24.62 | 24.38 | 23.54 | 0.55 |
| 330.0908 | 105.65 | 14.69 | 17.55 | 14.26 | 16.24 | 0.66 |
| 330.2271 | 25.1   | 18.69 | 18.85 | 18.44 | 18.13 | 0.14 |
| 330.2487 | 23.46  | 19.56 | 18.39 | 18.47 | 19.34 | 0.94 |
| 330.2636 | 22.73  | 16.44 | 13.14 | 13.41 | 14.48 | 1.33 |
| 330.6284 | 29.92  | 15.80 | 14.82 | 17.14 | 16.49 | 0.08 |
| 330.6809 | 28.17  | 14.94 | 17.20 | 16.05 | 14.19 | 0.53 |
| 330.7454 | 48.64  | 17.90 | 18.24 | 18.41 | 18.03 | 0.66 |
| 330.7529 | 47.96  | 17.29 | 17.57 | 17.18 | 17.96 | 0.13 |

|          |        |       |       |       |       |      |
|----------|--------|-------|-------|-------|-------|------|
| 330.8812 | 44.91  | 13.71 | 13.27 | 14.82 | 13.86 | 0.09 |
| 330.9137 | 48.95  | 15.54 | 15.01 | 15.44 | 15.34 | 0.15 |
| 330.9271 | 128.7  | 15.66 | 16.52 | 15.28 | 15.52 | 0.10 |
| 330.9287 | 252.13 | 14.07 | 17.26 | 17.14 | 16.08 | 1.32 |
| 331.0021 | 175.23 | 17.05 | 14.99 | 15.07 | 15.82 | 1.45 |
| 331.0237 | 47.99  | 16.62 | 14.37 | 14.93 | 15.77 | 0.90 |
| 331.0575 | 86.31  | 15.87 | 18.40 | 17.84 | 17.42 | 1.49 |
| 331.0704 | 76.07  | 17.67 | 18.96 | 19.30 | 18.07 | 0.92 |
| 331.0764 | 65.68  | 20.32 | 21.25 | 21.08 | 20.26 | 0.55 |
| 331.0927 | 68.98  | 17.93 | 18.74 | 18.28 | 18.67 | 0.44 |
| 331.1113 | 102.42 | 15.88 | 17.65 | 15.27 | 17.10 | 0.49 |
| 331.1669 | 72.71  | 15.19 | 15.23 | 16.13 | 15.86 | 0.25 |
| 331.1764 | 76.77  | 15.94 | 16.86 | 17.19 | 14.53 | 0.33 |
| 331.1941 | 23.78  | 14.73 | 17.01 | 12.50 | 17.84 | 0.26 |
| 331.2090 | 86.21  | 16.52 | 14.34 | 15.43 | 14.86 | 0.87 |
| 331.2267 | 216.07 | 16.61 | 11.90 | 12.50 | 12.32 | 1.21 |
| 331.2302 | 27.68  | 14.07 | 14.70 | 14.38 | 13.73 | 0.18 |
| 331.2505 | 24.67  | 16.16 | 17.12 | 16.83 | 15.15 | 0.33 |
| 331.2627 | 23.77  | 20.55 | 18.33 | 19.32 | 19.27 | 1.38 |
| 331.2632 | 166.62 | 18.46 | 16.25 | 17.10 | 16.70 | 1.24 |
| 331.2838 | 23.97  | 18.68 | 14.82 | 15.45 | 15.16 | 1.75 |
| 331.2840 | 284.04 | 20.79 | 19.53 | 19.24 | 18.97 | 0.81 |
| 331.5242 | 284.48 | 8.30  | 16.51 | 16.74 | 13.53 | 1.61 |
| 331.5983 | 97.91  | 18.27 | 13.16 | 14.15 | 13.65 | 1.57 |
| 331.6363 | 29.45  | 16.19 | 18.83 | 20.31 | 19.30 | 1.76 |
| 331.8755 | 38.43  | 14.99 | 14.20 | 15.10 | 15.24 | 0.12 |
| 331.9257 | 46.18  | 17.20 | 15.09 | 16.46 | 15.21 | 0.86 |
| 331.9963 | 258.6  | 16.88 | 16.09 | 14.15 | 15.07 | 0.69 |
| 332.0059 | 52.5   | 16.22 | 12.28 | 15.52 | 14.05 | 0.83 |
| 332.0322 | 92.83  | 20.15 | 17.28 | 17.76 | 18.12 | 1.51 |
| 332.0417 | 78.48  | 17.32 | 11.85 | 13.11 | 13.84 | 1.43 |
| 332.0690 | 64.23  | 18.92 | 19.80 | 19.62 | 18.92 | 0.53 |
| 332.0744 | 292.14 | 12.16 | 15.07 | 15.50 | 14.01 | 0.86 |
| 332.0771 | 76.16  | 17.75 | 18.24 | 18.43 | 17.88 | 0.69 |
| 332.0955 | 81.65  | 19.62 | 19.89 | 19.84 | 19.61 | 0.30 |
| 332.1380 | 29.88  | 14.65 | 15.14 | 18.44 | 17.74 | 0.84 |
| 332.1677 | 37.77  | 16.34 | 11.92 | 16.01 | 15.77 | 0.87 |
| 332.2429 | 25.2   | 19.89 | 22.13 | 21.11 | 20.72 | 1.28 |
| 332.2655 | 23.11  | 18.55 | 14.50 | 17.03 | 16.97 | 1.34 |
| 332.2872 | 24.2   | 16.42 | 10.10 | 11.83 | 9.50  | 1.39 |
| 332.2876 | 164.73 | 18.61 | 14.03 | 14.74 | 14.87 | 1.62 |
| 332.3307 | 22.67  | 17.73 | 14.00 | 15.07 | 16.59 | 1.22 |
| 332.5174 | 56.72  | 16.13 | 17.44 | 17.59 | 17.54 | 0.70 |
| 332.5616 | 280.3  | 17.36 | 21.40 | 21.02 | 19.61 | 1.62 |
| 332.5891 | 286.33 | 14.43 | 17.59 | 18.03 | 16.56 | 1.57 |
| 332.6783 | 28.24  | 15.51 | 17.87 | 17.30 | 17.42 | 1.51 |
| 332.7467 | 43.5   | 17.63 | 18.22 | 18.79 | 18.12 | 0.74 |
| 332.8317 | 46.66  | 14.83 | 14.72 | 14.88 | 15.16 | 0.02 |
| 332.8397 | 48.62  | 16.53 | 17.21 | 17.07 | 17.47 | 0.60 |
| 332.8575 | 42.44  | 16.41 | 19.16 | 18.88 | 19.18 | 1.73 |
| 332.8656 | 47.93  | 15.25 | 15.42 | 15.60 | 15.37 | 0.15 |
| 332.8753 | 284.51 | 14.62 | 17.18 | 16.45 | 15.61 | 1.02 |
| 332.8848 | 295.46 | 18.00 | 17.52 | 17.26 | 17.75 | 0.27 |
| 332.9124 | 48.24  | 15.61 | 17.07 | 18.32 | 17.47 | 1.30 |
| 332.9273 | 35.27  | 17.91 | 15.34 | 14.91 | 15.66 | 1.32 |
| 332.9549 | 48.46  | 23.94 | 24.68 | 25.00 | 24.03 | 0.66 |

|          |        |       |       |       |       |      |
|----------|--------|-------|-------|-------|-------|------|
| 332.9667 | 83.85  | 17.69 | 15.22 | 13.99 | 16.73 | 1.09 |
| 333.0611 | 290.22 | 13.99 | 18.49 | 18.42 | 17.05 | 1.59 |
| 333.0613 | 65.7   | 16.30 | 18.87 | 19.36 | 18.50 | 1.39 |
| 333.0717 | 71.53  | 16.81 | 16.63 | 15.89 | 16.70 | 0.33 |
| 333.0770 | 280.12 | 15.79 | 17.91 | 18.17 | 17.46 | 1.36 |
| 333.0855 | 52.75  | 15.56 | 14.74 | 14.72 | 16.02 | 0.34 |
| 333.0912 | 204.08 | 10.22 | 15.28 | 12.99 | 12.40 | 1.08 |
| 333.0983 | 69.72  | 16.17 | 15.45 | 15.01 | 15.57 | 0.47 |
| 333.1507 | 23.98  | 17.38 | 10.43 | 10.88 | 12.86 | 1.86 |
| 333.1764 | 37.03  | 15.33 | 14.84 | 16.52 | 16.58 | 0.18 |
| 333.1893 | 75.63  | 13.02 | 18.01 | 17.57 | 16.73 | 1.51 |
| 333.2058 | 29.93  | 17.36 | 14.59 | 15.29 | 16.34 | 1.21 |
| 333.2460 | 24.32  | 17.18 | 19.44 | 18.19 | 18.03 | 1.13 |
| 333.2530 | 22.05  | 14.63 | 15.04 | 17.69 | 16.20 | 0.87 |
| 333.2784 | 23.54  | 19.04 | 17.75 | 18.43 | 18.54 | 0.60 |
| 333.2788 | 161.91 | 17.68 | 15.84 | 16.41 | 16.79 | 1.01 |
| 333.5170 | 76.9   | 16.38 | 18.13 | 18.84 | 18.57 | 1.11 |
| 333.5238 | 80.6   | 14.05 | 16.96 | 16.37 | 13.99 | 0.72 |
| 333.6230 | 26.66  | 15.19 | 18.39 | 15.33 | 18.74 | 0.77 |
| 333.6680 | 28.42  | 15.64 | 16.33 | 17.30 | 17.55 | 0.77 |
| 333.6762 | 63.49  | 13.83 | 16.53 | 16.26 | 15.46 | 1.05 |
| 333.6862 | 28.48  | 16.39 | 19.59 | 18.81 | 18.61 | 1.61 |
| 333.7458 | 22.28  | 14.14 | 12.59 | 13.22 | 14.46 | 0.55 |
| 333.7545 | 22.06  | 15.00 | 14.14 | 17.12 | 15.74 | 0.26 |
| 333.8247 | 51.25  | 19.45 | 17.89 | 18.09 | 17.73 | 1.00 |
| 333.8521 | 72.27  | 13.59 | 15.30 | 17.12 | 17.21 | 0.90 |
| 333.9542 | 51.4   | 16.81 | 17.05 | 17.47 | 16.17 | 0.21 |
| 333.9598 | 52.51  | 19.35 | 19.84 | 20.22 | 19.26 | 0.56 |
| 333.9669 | 118.66 | 14.96 | 15.24 | 13.38 | 14.70 | 0.30 |
| 333.9968 | 73.63  | 17.23 | 17.39 | 17.52 | 17.57 | 0.17 |
| 334.0351 | 293    | 11.43 | 18.43 | 18.46 | 15.21 | 1.50 |
| 334.0429 | 250.18 | 18.08 | 17.64 | 17.71 | 18.58 | 0.16 |
| 334.0602 | 62.3   | 16.79 | 15.85 | 17.47 | 16.90 | 0.12 |
| 334.0750 | 82.46  | 19.42 | 21.61 | 21.01 | 20.85 | 1.05 |
| 334.0883 | 292.84 | 12.26 | 16.25 | 16.47 | 14.65 | 1.46 |
| 334.1245 | 88.41  | 16.72 | 18.02 | 18.50 | 18.81 | 0.80 |
| 334.1412 | 51.58  | 17.69 | 15.47 | 17.55 | 19.79 | 0.43 |
| 334.1878 | 35.86  | 13.57 | 17.63 | 16.89 | 16.83 | 1.43 |
| 334.2067 | 35.08  | 14.86 | 18.73 | 17.04 | 18.03 | 1.20 |
| 334.2514 | 22.57  | 13.96 | 13.90 | 13.49 | 14.37 | 0.10 |
| 334.2818 | 23.67  | 16.86 | 13.95 | 15.25 | 15.72 | 0.84 |
| 334.5188 | 303.52 | 15.20 | 15.41 | 15.30 | 14.20 | 0.01 |
| 334.5443 | 252.07 | 16.87 | 16.02 | 16.67 | 16.49 | 0.37 |
| 334.5727 | 125.61 | 15.26 | 16.57 | 13.05 | 13.89 | 0.20 |
| 334.6574 | 34.32  | 15.72 | 12.82 | 17.88 | 14.74 | 0.26 |
| 334.6929 | 43.39  | 21.73 | 20.80 | 20.37 | 19.98 | 0.78 |
| 334.7625 | 25.03  | 15.05 | 15.08 | 17.89 | 16.37 | 0.62 |
| 334.8292 | 44.93  | 14.29 | 15.34 | 15.25 | 15.21 | 1.15 |
| 334.8368 | 48.69  | 16.52 | 17.16 | 17.03 | 17.51 | 0.58 |
| 334.8467 | 265.99 | 16.95 | 7.79  | 8.56  | 9.64  | 1.67 |
| 334.8559 | 43.04  | 15.43 | 16.91 | 16.55 | 17.19 | 1.37 |
| 334.8629 | 47.8   | 14.86 | 13.91 | 15.29 | 15.20 | 0.10 |
| 334.8736 | 43.65  | 17.25 | 19.82 | 20.24 | 19.69 | 1.67 |
| 334.8835 | 51.08  | 15.12 | 15.08 | 15.88 | 14.53 | 0.08 |
| 334.9153 | 46.23  | 17.46 | 19.07 | 19.00 | 19.07 | 1.19 |
| 334.9504 | 304.42 | 8.22  | 15.74 | 9.19  | 9.04  | 0.91 |

|          |        |       |       |       |       |      |
|----------|--------|-------|-------|-------|-------|------|
| 334.9508 | 70.03  | 20.82 | 21.49 | 21.86 | 21.05 | 0.80 |
| 334.9605 | 53.25  | 17.60 | 16.90 | 17.02 | 16.74 | 0.77 |
| 335.0018 | 63.33  | 18.27 | 16.78 | 17.03 | 16.53 | 1.19 |
| 335.0401 | 268.66 | 16.12 | 19.06 | 18.65 | 17.18 | 1.37 |
| 335.0514 | 280.44 | 17.89 | 18.10 | 18.82 | 17.56 | 0.34 |
| 335.0639 | 102.95 | 14.50 | 17.17 | 16.04 | 16.05 | 0.94 |
| 335.0735 | 285.42 | 19.85 | 21.24 | 21.47 | 20.55 | 1.33 |
| 335.0754 | 80.08  | 15.27 | 17.86 | 16.76 | 16.94 | 0.68 |
| 335.1255 | 59.1   | 20.15 | 19.53 | 19.82 | 19.47 | 1.00 |
| 335.1465 | 56.04  | 14.40 | 12.11 | 12.25 | 16.46 | 0.59 |
| 335.1654 | 26.82  | 20.45 | 15.19 | 15.97 | 17.13 | 1.70 |
| 335.1979 | 44.72  | 19.75 | 18.37 | 18.28 | 18.57 | 1.62 |
| 335.2210 | 30.35  | 20.94 | 18.87 | 19.94 | 20.56 | 0.95 |
| 335.5533 | 282.2  | 14.50 | 14.59 | 15.70 | 13.93 | 0.21 |
| 335.5941 | 252.24 | 15.58 | 17.47 | 18.33 | 17.55 | 1.25 |
| 335.6559 | 25.51  | 14.82 | 18.03 | 12.13 | 12.44 | 0.06 |
| 335.6663 | 36.68  | 17.19 | 13.01 | 16.58 | 15.96 | 0.93 |
| 335.8221 | 51.1   | 19.21 | 17.78 | 17.84 | 17.23 | 0.93 |
| 335.8767 | 43.67  | 14.49 | 14.17 | 14.71 | 14.45 | 0.05 |
| 335.9191 | 45.63  | 16.60 | 16.00 | 15.18 | 15.85 | 0.71 |
| 335.9421 | 47.63  | 15.20 | 14.76 | 15.20 | 15.34 | 0.18 |
| 335.9564 | 51.36  | 16.31 | 16.39 | 16.53 | 15.53 | 0.00 |
| 335.9825 | 93.97  | 17.87 | 16.90 | 16.96 | 16.24 | 0.65 |
| 336.0000 | 49.41  | 15.16 | 14.03 | 15.52 | 13.69 | 0.30 |
| 336.0104 | 77.01  | 17.08 | 20.58 | 20.84 | 19.94 | 1.67 |
| 336.0730 | 73.79  | 17.43 | 17.52 | 16.84 | 17.81 | 0.06 |
| 336.0764 | 288.04 | 14.77 | 16.90 | 17.16 | 15.89 | 1.17 |
| 336.0959 | 180.51 | 10.92 | 14.64 | 14.27 | 14.49 | 1.39 |
| 336.1039 | 127.76 | 14.53 | 15.71 | 15.15 | 14.87 | 0.68 |
| 336.1286 | 51.66  | 17.78 | 16.35 | 16.36 | 16.37 | 1.47 |
| 336.1399 | 295.99 | 11.03 | 14.28 | 14.51 | 12.95 | 1.18 |
| 336.1402 | 120.91 | 19.44 | 20.38 | 20.24 | 19.86 | 0.99 |
| 336.1499 | 95.94  | 16.16 | 14.37 | 14.70 | 15.22 | 0.93 |
| 336.1695 | 25.82  | 17.84 | 12.10 | 14.22 | 14.57 | 1.56 |
| 336.2014 | 45.05  | 16.98 | 14.59 | 14.73 | 14.89 | 1.02 |
| 336.2217 | 25.83  | 19.05 | 20.63 | 19.45 | 20.23 | 1.02 |
| 336.5337 | 109.27 | 15.72 | 14.87 | 13.56 | 14.53 | 0.80 |
| 336.6905 | 44.97  | 22.48 | 21.12 | 21.05 | 20.59 | 0.90 |
| 336.8336 | 48.76  | 15.05 | 14.71 | 14.52 | 15.17 | 0.23 |
| 336.8436 | 34.83  | 16.08 | 17.53 | 18.42 | 17.94 | 1.06 |
| 336.8529 | 59.84  | 12.92 | 16.30 | 16.49 | 16.27 | 1.51 |
| 336.8716 | 43.77  | 15.02 | 17.75 | 18.25 | 17.51 | 1.54 |
| 336.8784 | 50.61  | 13.04 | 14.77 | 14.80 | 14.23 | 1.00 |
| 336.9035 | 38.22  | 13.28 | 14.17 | 15.48 | 13.76 | 0.53 |
| 336.9127 | 39.46  | 15.42 | 17.85 | 17.26 | 17.15 | 1.57 |
| 336.9205 | 47.61  | 15.10 | 14.29 | 15.73 | 13.79 | 0.16 |
| 336.9349 | 27.18  | 14.19 | 13.03 | 13.11 | 13.41 | 0.74 |
| 336.9440 | 105.56 | 16.24 | 13.55 | 11.68 | 14.56 | 1.09 |
| 336.9500 | 52.23  | 16.67 | 16.91 | 16.65 | 16.05 | 0.01 |
| 337.0103 | 86.62  | 15.56 | 16.58 | 16.63 | 16.24 | 0.83 |
| 337.0273 | 291.89 | 16.74 | 17.99 | 18.07 | 16.68 | 0.76 |
| 337.0393 | 55.16  | 16.11 | 16.91 | 16.01 | 16.45 | 0.23 |
| 337.0414 | 246.63 | 17.11 | 16.74 | 18.22 | 17.26 | 0.20 |
| 337.0562 | 48.38  | 17.29 | 15.54 | 15.74 | 16.31 | 1.31 |
| 337.0999 | 61.54  | 14.93 | 14.17 | 15.37 | 14.24 | 0.15 |
| 337.1436 | 113.21 | 16.82 | 16.80 | 16.74 | 16.47 | 0.11 |



|          |        |       |       |       |       |      |
|----------|--------|-------|-------|-------|-------|------|
| 337.1532 | 88.63  | 18.84 | 18.88 | 19.15 | 18.50 | 0.07 |
| 337.1669 | 23.13  | 17.07 | 17.34 | 15.21 | 15.48 | 0.35 |
| 337.1822 | 21.43  | 18.39 | 7.91  | 9.69  | 13.06 | 1.72 |
| 337.2138 | 45.77  | 19.83 | 17.97 | 18.16 | 18.13 | 1.78 |
| 337.2250 | 26.06  | 15.06 | 17.76 | 16.24 | 17.14 | 0.99 |
| 337.2373 | 26.26  | 18.22 | 15.72 | 16.06 | 17.58 | 0.92 |
| 337.2736 | 25.49  | 20.57 | 18.90 | 19.13 | 19.41 | 1.15 |
| 337.5194 | 301.42 | 15.52 | 17.36 | 15.94 | 15.49 | 0.48 |
| 337.5292 | 291.74 | 15.25 | 14.75 | 15.64 | 14.26 | 0.15 |
| 337.6707 | 27.15  | 15.74 | 17.02 | 15.88 | 14.21 | 0.24 |
| 337.6765 | 32.86  | 15.35 | 14.07 | 16.98 | 16.41 | 0.06 |
| 337.8191 | 48.95  | 17.77 | 15.56 | 15.02 | 14.87 | 1.00 |
| 337.8660 | 114.42 | 14.47 | 16.93 | 12.63 | 16.78 | 0.30 |
| 337.8971 | 101.77 | 14.44 | 17.32 | 14.07 | 16.97 | 0.73 |
| 337.9084 | 52.48  | 20.20 | 19.28 | 20.12 | 18.77 | 0.48 |
| 338.0072 | 86.13  | 15.56 | 17.02 | 17.23 | 16.62 | 1.23 |
| 338.0140 | 51.48  | 17.02 | 17.96 | 18.57 | 18.13 | 1.01 |
| 338.0208 | 308.14 | 13.47 | 13.72 | 12.12 | 12.22 | 0.31 |
| 338.0302 | 283.51 | 14.47 | 16.92 | 16.93 | 16.59 | 1.49 |
| 338.0374 | 67.88  | 17.92 | 16.01 | 15.18 | 16.61 | 0.94 |
| 338.0475 | 198.48 | 19.64 | 21.96 | 22.42 | 22.11 | 1.25 |
| 338.0762 | 288.01 | 17.73 | 21.06 | 21.34 | 19.75 | 1.73 |
| 338.1103 | 32.23  | 12.56 | 14.25 | 17.98 | 16.18 | 1.00 |
| 338.1819 | 56.09  | 15.98 | 15.63 | 15.95 | 16.13 | 0.11 |
| 338.1960 | 25.19  | 14.52 | 16.86 | 11.01 | 11.67 | 0.22 |
| 338.2176 | 40.36  | 17.09 | 14.97 | 15.49 | 16.22 | 0.89 |
| 338.2323 | 23.42  | 15.59 | 12.07 | 14.50 | 12.96 | 0.97 |
| 338.2690 | 208.25 | 16.28 | 10.48 | 11.36 | 12.62 | 1.59 |
| 338.2767 | 23.7   | 18.28 | 13.60 | 15.22 | 16.19 | 1.42 |
| 338.3414 | 23.51  | 17.22 | 16.51 | 16.47 | 16.19 | 0.47 |
| 338.3414 | 278.32 | 18.31 | 16.73 | 16.59 | 16.23 | 1.13 |
| 338.6437 | 28.65  | 16.11 | 18.83 | 18.11 | 18.55 | 1.46 |
| 338.6879 | 45.02  | 21.86 | 20.50 | 20.43 | 20.01 | 0.89 |
| 338.7767 | 45.94  | 15.61 | 16.49 | 16.58 | 16.36 | 1.15 |
| 338.7850 | 48.08  | 16.07 | 17.96 | 17.97 | 17.67 | 1.05 |
| 338.8419 | 43.66  | 14.69 | 14.98 | 16.19 | 15.42 | 0.40 |
| 338.8697 | 43     | 14.07 | 15.24 | 15.20 | 14.29 | 0.39 |
| 338.8895 | 85.44  | 13.46 | 16.18 | 14.96 | 14.63 | 0.94 |
| 338.9093 | 26.46  | 16.64 | 15.51 | 14.44 | 14.87 | 0.78 |
| 338.9204 | 47.61  | 15.31 | 16.40 | 17.42 | 16.54 | 1.02 |
| 338.9710 | 38.44  | 17.14 | 16.71 | 16.49 | 16.36 | 0.58 |
| 338.9869 | 92.3   | 15.33 | 15.46 | 12.22 | 15.34 | 0.35 |
| 339.0109 | 53.03  | 18.19 | 18.43 | 19.00 | 18.17 | 0.45 |
| 339.0208 | 61.36  | 19.74 | 18.50 | 19.30 | 18.35 | 0.68 |
| 339.0365 | 57.48  | 15.59 | 11.64 | 14.24 | 12.17 | 0.81 |
| 339.0548 | 218.55 | 17.49 | 21.29 | 21.91 | 20.73 | 1.56 |
| 339.0657 | 255.78 | 13.20 | 12.65 | 15.41 | 14.74 | 0.27 |
| 339.0793 | 131.04 | 13.52 | 14.52 | 15.45 | 15.79 | 0.76 |
| 339.0796 | 294.14 | 12.09 | 16.78 | 17.08 | 15.76 | 1.95 |
| 339.1182 | 32.04  | 15.17 | 13.36 | 17.51 | 16.39 | 0.09 |
| 339.1458 | 28.79  | 12.32 | 16.70 | 15.89 | 16.22 | 1.15 |
| 339.2262 | 22.61  | 15.42 | 17.39 | 15.01 | 16.91 | 0.57 |
| 339.2716 | 193.81 | 16.70 | 8.95  | 10.65 | 10.20 | 1.61 |
| 339.2891 | 25.3   | 20.29 | 18.20 | 18.36 | 18.93 | 1.30 |
| 339.2893 | 153.73 | 19.00 | 16.57 | 16.78 | 16.66 | 1.55 |
| 339.5369 | 84.68  | 14.63 | 16.25 | 16.76 | 16.28 | 1.06 |

|          |        |       |       |       |       |      |
|----------|--------|-------|-------|-------|-------|------|
| 339.6507 | 99.12  | 13.35 | 15.26 | 16.45 | 15.71 | 0.97 |
| 339.6680 | 28.76  | 13.36 | 15.72 | 16.52 | 15.78 | 0.89 |
| 339.7045 | 27.46  | 15.76 | 18.14 | 14.77 | 15.07 | 0.34 |
| 339.7277 | 22.65  | 14.09 | 15.78 | 12.81 | 15.53 | 0.23 |
| 339.9055 | 53.69  | 17.82 | 16.83 | 17.11 | 16.18 | 0.70 |
| 339.9568 | 53.07  | 15.63 | 17.12 | 17.34 | 16.61 | 1.06 |
| 340.0071 | 48.14  | 17.66 | 14.31 | 16.17 | 16.12 | 1.23 |
| 340.0102 | 280.1  | 20.87 | 20.67 | 20.83 | 20.68 | 0.13 |
| 340.0202 | 286.7  | 14.03 | 14.75 | 14.84 | 15.28 | 0.37 |
| 340.0218 | 80.12  | 16.57 | 13.11 | 14.63 | 15.22 | 0.80 |
| 340.0434 | 200.56 | 15.76 | 17.80 | 17.85 | 18.24 | 0.98 |
| 340.0522 | 192.14 | 9.56  | 12.64 | 12.55 | 13.32 | 0.73 |
| 340.0583 | 204.16 | 11.38 | 15.49 | 15.31 | 15.69 | 1.29 |
| 340.0633 | 229.5  | 16.03 | 18.15 | 19.17 | 17.65 | 1.45 |
| 340.0809 | 262.63 | 13.25 | 18.27 | 18.40 | 17.01 | 1.64 |
| 340.0824 | 126.91 | 13.63 | 16.29 | 16.60 | 16.17 | 1.17 |
| 340.1769 | 107.19 | 12.27 | 16.55 | 17.07 | 16.04 | 1.71 |
| 340.2231 | 57.18  | 15.96 | 15.66 | 15.63 | 15.33 | 0.28 |
| 340.2339 | 23.96  | 17.44 | 20.11 | 18.77 | 19.68 | 1.30 |
| 340.2479 | 23.38  | 16.92 | 16.85 | 16.50 | 16.67 | 0.18 |
| 340.2842 | 23.85  | 18.21 | 14.95 | 15.46 | 15.77 | 1.76 |
| 340.2843 | 285.04 | 19.57 | 18.79 | 18.65 | 18.35 | 0.46 |
| 340.2924 | 23.14  | 18.08 | 14.36 | 13.94 | 15.23 | 1.48 |
| 340.3208 | 22.63  | 16.00 | 15.24 | 14.15 | 14.47 | 0.78 |
| 340.5115 | 112.27 | 9.16  | 14.28 | 15.60 | 14.20 | 1.37 |
| 340.5541 | 302.24 | 15.45 | 15.73 | 15.21 | 14.98 | 0.03 |
| 340.6758 | 28.11  | 16.15 | 18.79 | 18.74 | 18.77 | 1.63 |
| 340.6847 | 47.58  | 20.45 | 18.96 | 18.88 | 18.60 | 1.01 |
| 340.7116 | 30.71  | 9.35  | 18.66 | 7.10  | 9.16  | 0.68 |
| 340.7356 | 22.39  | 16.64 | 18.83 | 17.44 | 18.44 | 1.05 |
| 340.7745 | 45.65  | 15.77 | 16.18 | 16.26 | 16.06 | 0.70 |
| 340.7821 | 48.14  | 16.65 | 18.47 | 18.47 | 18.27 | 1.08 |
| 340.8268 | 47.76  | 14.88 | 16.16 | 16.56 | 15.45 | 0.85 |
| 340.8640 | 20.07  | 16.65 | 10.72 | 12.41 | 12.53 | 1.70 |
| 340.9346 | 35.64  | 15.95 | 17.58 | 18.99 | 18.12 | 1.59 |
| 340.9641 | 87.52  | 15.99 | 16.75 | 17.06 | 16.61 | 0.52 |
| 340.9792 | 67.73  | 17.51 | 16.34 | 16.73 | 16.41 | 0.57 |
| 341.0029 | 305.2  | 16.21 | 18.49 | 18.96 | 16.16 | 1.16 |
| 341.0133 | 52.89  | 18.00 | 15.09 | 16.24 | 15.89 | 1.30 |
| 341.0512 | 208.23 | 12.03 | 17.16 | 16.83 | 16.53 | 1.57 |
| 341.1355 | 37.87  | 18.44 | 14.91 | 14.35 | 15.52 | 1.42 |
| 341.1790 | 42.21  | 16.70 | 19.49 | 18.87 | 19.50 | 1.51 |
| 341.2150 | 42.8   | 15.02 | 16.45 | 12.30 | 13.61 | 0.21 |
| 341.2419 | 23.04  | 16.94 | 19.99 | 18.54 | 19.22 | 1.42 |
| 341.2509 | 23.3   | 13.70 | 12.56 | 14.06 | 13.79 | 0.20 |
| 341.2684 | 22.18  | 17.33 | 13.69 | 14.08 | 14.67 | 1.91 |
| 341.2686 | 291.65 | 19.23 | 17.06 | 17.11 | 17.11 | 1.22 |
| 341.2875 | 291.53 | 17.68 | 16.17 | 16.22 | 15.88 | 1.01 |
| 341.2878 | 185.47 | 18.18 | 15.26 | 15.31 | 15.87 | 1.68 |
| 341.3045 | 24.15  | 21.65 | 19.55 | 19.40 | 18.98 | 1.44 |
| 341.3048 | 141.34 | 22.36 | 22.28 | 21.24 | 20.75 | 0.24 |
| 341.6658 | 32.35  | 15.08 | 12.68 | 16.09 | 14.60 | 0.36 |
| 341.7434 | 22.35  | 16.04 | 18.71 | 17.32 | 17.83 | 1.08 |
| 341.8633 | 45.51  | 16.47 | 13.36 | 12.68 | 13.24 | 1.22 |
| 341.8868 | 45.87  | 15.61 | 13.82 | 14.21 | 14.01 | 0.83 |
| 341.9554 | 49.66  | 14.77 | 15.66 | 16.12 | 15.84 | 0.85 |

|          |        |       |       |       |       |      |
|----------|--------|-------|-------|-------|-------|------|
| 341.9627 | 47.89  | 17.06 | 16.80 | 17.63 | 17.32 | 0.15 |
| 341.9868 | 80.39  | 15.92 | 18.45 | 16.68 | 17.79 | 1.04 |
| 342.0625 | 271.11 | 16.86 | 17.70 | 17.44 | 17.41 | 0.35 |
| 342.1392 | 280.36 | 15.77 | 20.11 | 20.13 | 19.07 | 1.66 |
| 342.1852 | 28.37  | 15.64 | 18.03 | 16.61 | 15.95 | 0.70 |
| 342.2497 | 23.4   | 17.61 | 20.61 | 19.32 | 20.03 | 1.49 |
| 342.2635 | 23.5   | 17.99 | 18.67 | 18.62 | 18.46 | 0.53 |
| 342.2777 | 30.97  | 17.11 | 15.44 | 15.87 | 16.44 | 0.70 |
| 342.3004 | 298.81 | 16.46 | 16.29 | 15.90 | 15.89 | 0.17 |
| 342.3006 | 153.47 | 18.81 | 15.86 | 15.40 | 16.40 | 1.75 |
| 342.3079 | 24.53  | 19.89 | 16.27 | 16.38 | 16.01 | 1.73 |
| 342.3080 | 287.3  | 20.97 | 19.72 | 19.81 | 19.16 | 0.55 |
| 342.3082 | 153.46 | 20.47 | 19.15 | 19.47 | 19.26 | 0.54 |
| 342.3365 | 22.77  | 17.51 | 15.81 | 15.36 | 15.22 | 1.11 |
| 342.6016 | 267.72 | 14.64 | 17.02 | 17.56 | 17.23 | 1.51 |
| 342.6846 | 40.67  | 18.47 | 18.88 | 18.87 | 16.45 | 0.02 |
| 342.7511 | 23.23  | 16.73 | 19.40 | 18.34 | 18.90 | 1.42 |
| 342.7791 | 49.24  | 17.05 | 17.37 | 17.32 | 17.28 | 0.26 |
| 342.8236 | 47.53  | 14.58 | 16.31 | 16.70 | 15.84 | 1.32 |
| 342.8606 | 46.46  | 16.66 | 15.76 | 16.15 | 16.36 | 0.54 |
| 342.8685 | 48.98  | 16.54 | 17.73 | 17.78 | 18.05 | 1.06 |
| 342.8786 | 44.3   | 13.25 | 16.27 | 16.24 | 15.71 | 1.41 |
| 342.9569 | 59.81  | 16.77 | 16.80 | 16.57 | 17.05 | 0.01 |
| 342.9743 | 44.29  | 15.90 | 15.02 | 17.00 | 15.92 | 0.00 |
| 342.9842 | 87.48  | 13.85 | 16.84 | 14.00 | 16.18 | 0.71 |
| 343.0127 | 260.22 | 16.07 | 16.67 | 15.74 | 14.98 | 0.00 |
| 343.0526 | 42.25  | 15.47 | 15.52 | 16.13 | 16.25 | 0.21 |
| 343.0658 | 87     | 17.33 | 11.29 | 11.58 | 11.90 | 1.40 |
| 343.0934 | 292.25 | 15.04 | 17.07 | 18.21 | 16.73 | 1.20 |
| 343.1419 | 288.78 | 14.74 | 15.16 | 15.96 | 15.21 | 0.41 |
| 343.1602 | 55.62  | 17.01 | 17.10 | 16.94 | 16.80 | 0.02 |
| 343.1936 | 30.74  | 18.20 | 21.79 | 20.18 | 21.59 | 1.63 |
| 343.2258 | 27.23  | 16.85 | 11.96 | 13.36 | 14.20 | 1.37 |
| 343.2515 | 24.25  | 14.42 | 17.27 | 16.52 | 16.20 | 1.11 |
| 343.2664 | 23.51  | 15.10 | 14.84 | 15.23 | 15.11 | 0.04 |
| 343.2855 | 33.41  | 18.20 | 16.88 | 16.66 | 17.06 | 0.84 |
| 343.2953 | 27.39  | 17.72 | 17.45 | 16.57 | 18.15 | 0.23 |
| 343.3112 | 23.9   | 16.10 | 10.49 | 11.62 | 9.43  | 1.48 |
| 343.3117 | 161.53 | 18.63 | 13.27 | 14.06 | 12.93 | 1.62 |
| 343.5952 | 297.07 | 12.32 | 16.57 | 17.03 | 15.08 | 1.33 |
| 343.6364 | 29.73  | 14.81 | 15.78 | 18.63 | 17.94 | 0.97 |
| 343.7872 | 39.42  | 17.15 | 13.95 | 14.05 | 14.89 | 0.94 |
| 343.8534 | 50.12  | 18.39 | 17.00 | 17.36 | 16.17 | 0.69 |
| 343.8614 | 49.76  | 17.44 | 19.88 | 20.03 | 19.47 | 1.74 |
| 343.9454 | 84.57  | 15.62 | 21.02 | 20.99 | 19.39 | 1.84 |
| 343.9591 | 48.37  | 14.92 | 14.14 | 14.49 | 14.71 | 0.22 |
| 343.9965 | 39.99  | 11.96 | 8.61  | 13.34 | 14.74 | 0.21 |
| 344.0045 | 92.85  | 16.89 | 16.97 | 16.33 | 16.61 | 0.11 |
| 344.0334 | 71.57  | 20.31 | 21.18 | 21.55 | 20.89 | 0.97 |
| 344.0592 | 90.26  | 16.07 | 19.40 | 19.93 | 18.37 | 1.66 |
| 344.0657 | 230.69 | 16.05 | 16.98 | 16.92 | 17.58 | 0.77 |
| 344.0900 | 60.64  | 16.96 | 17.37 | 17.48 | 17.32 | 0.29 |
| 344.1376 | 33.41  | 14.80 | 12.26 | 16.45 | 16.02 | 0.15 |
| 344.1973 | 25.79  | 16.05 | 19.13 | 17.23 | 19.09 | 1.31 |
| 344.2279 | 24     | 19.69 | 14.19 | 14.12 | 15.93 | 1.86 |
| 344.2438 | 23.16  | 16.22 | 15.84 | 17.70 | 17.00 | 0.40 |

|          |        |       |       |       |       |      |
|----------|--------|-------|-------|-------|-------|------|
| 344.2793 | 23.57  | 19.81 | 20.25 | 20.63 | 20.17 | 0.46 |
| 344.5833 | 290.07 | 12.47 | 15.32 | 14.95 | 12.34 | 0.75 |
| 344.6440 | 29.83  | 15.99 | 15.04 | 17.14 | 16.86 | 0.07 |
| 344.6967 | 39.55  | 13.25 | 17.45 | 15.89 | 16.06 | 1.15 |
| 344.7222 | 44.97  | 19.73 | 19.74 | 19.59 | 19.33 | 0.09 |
| 344.7295 | 52.9   | 15.58 | 14.67 | 14.96 | 14.27 | 0.41 |
| 344.8577 | 43.74  | 16.10 | 20.01 | 20.92 | 19.47 | 1.75 |
| 344.8717 | 25.16  | 20.16 | 21.88 | 22.23 | 21.09 | 1.00 |
| 344.8755 | 267.63 | 18.38 | 9.75  | 9.38  | 11.15 | 1.57 |
| 344.8903 | 46.83  | 15.83 | 14.39 | 15.88 | 15.40 | 0.41 |
| 344.9460 | 85.21  | 12.71 | 17.02 | 16.83 | 15.22 | 1.53 |
| 344.9551 | 44.68  | 16.11 | 16.57 | 17.75 | 16.81 | 0.71 |
| 344.9998 | 42.82  | 22.20 | 23.48 | 23.71 | 23.80 | 1.10 |
| 345.0287 | 279.73 | 20.15 | 20.76 | 21.83 | 20.71 | 0.38 |
| 345.0379 | 55.78  | 16.43 | 15.17 | 16.67 | 16.24 | 0.30 |
| 345.0777 | 272.25 | 17.20 | 15.89 | 16.90 | 15.72 | 0.49 |
| 345.1055 | 254.75 | 15.79 | 19.76 | 20.09 | 18.65 | 1.60 |
| 345.1944 | 69.56  | 15.04 | 16.63 | 16.37 | 15.72 | 0.91 |
| 345.2083 | 25.74  | 15.06 | 17.75 | 15.59 | 17.70 | 0.77 |
| 345.2424 | 23.87  | 17.28 | 13.69 | 14.99 | 16.22 | 1.38 |
| 345.2531 | 22.07  | 13.63 | 13.58 | 16.44 | 15.05 | 0.58 |
| 345.2648 | 25.08  | 17.39 | 14.19 | 14.68 | 15.53 | 1.18 |
| 345.2822 | 23.41  | 17.80 | 17.40 | 18.00 | 17.69 | 0.11 |
| 345.5320 | 250.13 | 18.53 | 17.90 | 19.21 | 18.69 | 0.01 |
| 345.6231 | 27.33  | 15.54 | 16.00 | 14.07 | 17.51 | 0.02 |
| 345.6519 | 29.57  | 15.06 | 16.45 | 18.64 | 18.08 | 1.21 |
| 345.7545 | 21.78  | 14.54 | 12.49 | 15.39 | 14.02 | 0.38 |
| 345.8512 | 49.97  | 17.56 | 15.71 | 15.65 | 14.46 | 0.83 |
| 345.8590 | 50.41  | 16.70 | 19.95 | 20.14 | 19.46 | 1.73 |
| 345.8934 | 304.3  | 15.23 | 18.94 | 17.67 | 17.28 | 1.60 |
| 345.9172 | 309.46 | 13.56 | 13.22 | 10.81 | 11.45 | 0.84 |
| 345.9417 | 77.09  | 15.62 | 17.97 | 17.98 | 16.98 | 1.30 |
| 345.9707 | 50.21  | 15.70 | 15.28 | 15.23 | 15.46 | 0.20 |
| 345.9823 | 54.98  | 17.22 | 10.80 | 11.39 | 14.63 | 1.78 |
| 346.0003 | 43.18  | 19.19 | 20.11 | 20.47 | 20.55 | 1.09 |
| 346.0355 | 276.21 | 16.96 | 17.79 | 16.25 | 16.01 | 0.00 |
| 346.0470 | 67.67  | 22.82 | 24.00 | 23.88 | 22.93 | 0.65 |
| 346.0605 | 87.67  | 16.10 | 18.01 | 16.69 | 16.78 | 0.67 |
| 346.0815 | 88.33  | 14.55 | 16.87 | 16.56 | 15.90 | 1.03 |
| 346.1090 | 246.4  | 14.27 | 13.71 | 13.66 | 13.20 | 0.39 |
| 346.1536 | 29.99  | 15.25 | 13.36 | 16.70 | 15.89 | 0.12 |
| 346.1836 | 65.24  | 14.89 | 16.14 | 16.55 | 16.10 | 0.71 |
| 346.2516 | 22.52  | 13.13 | 12.77 | 12.77 | 13.73 | 0.13 |
| 346.2590 | 21.95  | 15.65 | 15.93 | 17.51 | 16.82 | 0.76 |
| 346.5296 | 273.07 | 16.35 | 15.85 | 16.86 | 16.05 | 0.07 |
| 346.5700 | 144.37 | 10.52 | 15.33 | 12.62 | 13.74 | 1.01 |
| 346.6939 | 28.06  | 15.31 | 17.79 | 15.58 | 16.66 | 0.62 |
| 346.7230 | 48.22  | 20.22 | 20.23 | 20.11 | 19.67 | 0.09 |
| 346.8560 | 44.13  | 12.30 | 17.92 | 18.92 | 16.64 | 1.61 |
| 346.8625 | 52.47  | 14.52 | 15.38 | 15.82 | 15.98 | 0.62 |
| 346.8884 | 57.26  | 15.82 | 15.14 | 15.86 | 15.44 | 0.17 |
| 346.9517 | 34.69  | 14.92 | 16.56 | 16.36 | 16.43 | 0.77 |
| 346.9978 | 41.19  | 19.50 | 20.52 | 21.47 | 21.20 | 1.29 |
| 347.0048 | 275.43 | 16.36 | 18.20 | 19.04 | 17.67 | 1.26 |
| 347.0253 | 262.14 | 17.51 | 18.21 | 17.99 | 17.74 | 0.43 |
| 347.0345 | 86.5   | 17.66 | 16.34 | 16.72 | 16.49 | 0.76 |

|          |        |       |       |       |       |      |
|----------|--------|-------|-------|-------|-------|------|
| 347.0438 | 87.02  | 17.63 | 17.97 | 17.70 | 17.03 | 0.10 |
| 347.0504 | 69.77  | 19.61 | 20.64 | 20.57 | 19.56 | 0.59 |
| 347.0631 | 81.66  | 17.39 | 16.95 | 16.89 | 16.82 | 0.35 |
| 347.0746 | 96.86  | 16.61 | 19.05 | 18.29 | 18.33 | 1.41 |
| 347.0860 | 98.71  | 16.13 | 18.09 | 16.75 | 17.47 | 1.00 |
| 347.1213 | 102.03 | 14.40 | 14.02 | 12.82 | 14.83 | 0.41 |
| 347.1421 | 130.93 | 14.80 | 17.47 | 15.68 | 16.87 | 1.19 |
| 347.1674 | 99.68  | 16.11 | 17.16 | 17.31 | 16.73 | 1.06 |
| 347.2231 | 31.99  | 17.90 | 17.09 | 18.01 | 17.85 | 0.20 |
| 347.2595 | 22.91  | 15.84 | 12.53 | 13.15 | 14.55 | 1.18 |
| 347.2941 | 23.63  | 18.89 | 11.57 | 11.73 | 12.54 | 1.86 |
| 347.5489 | 60.52  | 15.60 | 15.96 | 16.26 | 16.44 | 0.41 |
| 347.6386 | 27.3   | 16.68 | 20.59 | 15.90 | 15.94 | 0.70 |
| 347.6828 | 35.2   | 15.65 | 15.45 | 16.91 | 17.42 | 0.32 |
| 347.7018 | 27.52  | 15.69 | 17.96 | 17.63 | 17.93 | 1.28 |
| 347.8555 | 50.36  | 16.02 | 18.14 | 18.38 | 17.84 | 1.72 |
| 347.8835 | 59.98  | 14.82 | 14.77 | 15.59 | 14.93 | 0.12 |
| 347.9705 | 51.59  | 16.30 | 13.39 | 16.02 | 15.88 | 0.55 |
| 348.0018 | 64.08  | 18.23 | 16.84 | 16.77 | 18.30 | 0.52 |
| 348.0445 | 69.33  | 19.39 | 20.40 | 20.27 | 19.28 | 0.54 |
| 348.0701 | 250.76 | 23.39 | 27.02 | 25.78 | 25.05 | 1.14 |
| 348.0902 | 83.09  | 18.92 | 19.82 | 19.74 | 19.80 | 0.71 |
| 348.1397 | 59.61  | 15.49 | 18.36 | 13.30 | 13.90 | 0.10 |
| 348.2313 | 24.09  | 15.02 | 14.13 | 12.95 | 16.91 | 0.37 |
| 348.6731 | 33.94  | 15.52 | 12.67 | 16.80 | 13.74 | 0.48 |
| 348.7170 | 45     | 19.28 | 19.08 | 18.91 | 18.69 | 0.29 |
| 348.7242 | 50.37  | 16.18 | 15.14 | 14.86 | 15.42 | 0.71 |
| 348.8114 | 47.44  | 16.92 | 18.67 | 18.70 | 18.44 | 1.40 |
| 348.8394 | 48.98  | 14.67 | 13.23 | 15.37 | 14.41 | 0.24 |
| 348.8558 | 70.79  | 14.51 | 12.10 | 13.12 | 14.91 | 0.40 |
| 348.8642 | 29.9   | 18.38 | 18.08 | 18.49 | 18.05 | 0.15 |
| 348.8867 | 46.17  | 15.93 | 16.97 | 18.05 | 17.42 | 1.22 |
| 348.9303 | 47.52  | 23.28 | 22.79 | 23.58 | 22.44 | 0.21 |
| 348.9398 | 257.4  | 13.82 | 16.16 | 16.47 | 15.51 | 1.25 |
| 348.9398 | 153.97 | 15.95 | 16.76 | 17.16 | 15.93 | 0.62 |
| 348.9607 | 106.27 | 15.81 | 16.59 | 13.97 | 16.85 | 0.09 |
| 348.9771 | 63.45  | 16.33 | 10.85 | 12.91 | 13.72 | 1.46 |
| 349.0022 | 45.92  | 19.37 | 18.88 | 20.02 | 18.74 | 0.08 |
| 349.0307 | 56.54  | 17.47 | 15.35 | 15.58 | 17.10 | 0.92 |
| 349.0541 | 214.06 | 15.78 | 25.96 | 25.57 | 24.05 | 1.75 |
| 349.0673 | 252.14 | 15.82 | 19.69 | 17.71 | 17.63 | 0.82 |
| 349.0733 | 269.94 | 19.77 | 23.79 | 22.28 | 21.52 | 1.14 |
| 349.0931 | 66.21  | 17.13 | 14.15 | 15.15 | 15.52 | 1.05 |
| 349.1177 | 129.87 | 11.77 | 17.80 | 15.43 | 15.77 | 1.22 |
| 349.1352 | 133.72 | 16.27 | 17.70 | 18.01 | 17.75 | 1.26 |
| 349.1773 | 44.57  | 17.17 | 13.29 | 14.71 | 14.88 | 1.33 |
| 349.1831 | 43.73  | 17.09 | 11.18 | 11.54 | 14.08 | 1.47 |
| 349.2383 | 27.57  | 14.87 | 12.40 | 11.06 | 16.22 | 0.53 |
| 349.6980 | 30.14  | 15.54 | 19.07 | 19.18 | 15.64 | 1.09 |
| 349.7809 | 292.64 | 15.77 | 16.88 | 16.99 | 15.95 | 0.62 |
| 349.7985 | 49.1   | 18.57 | 11.76 | 12.79 | 12.56 | 1.41 |
| 349.8491 | 43.02  | 13.88 | 15.75 | 13.34 | 15.25 | 0.45 |
| 349.9322 | 51.44  | 18.88 | 18.12 | 19.02 | 17.80 | 0.43 |
| 349.9713 | 119.68 | 14.75 | 14.11 | 14.58 | 14.93 | 0.13 |
| 349.9859 | 54.5   | 17.98 | 18.91 | 18.81 | 18.02 | 0.63 |
| 350.0115 | 39.74  | 14.61 | 11.74 | 15.83 | 13.44 | 0.31 |

|          |        |       |       |       |       |      |
|----------|--------|-------|-------|-------|-------|------|
| 350.0562 | 203.6  | 16.03 | 21.69 | 21.62 | 20.04 | 1.74 |
| 350.0748 | 240.87 | 15.33 | 20.23 | 19.13 | 17.44 | 1.13 |
| 350.0934 | 79.57  | 14.90 | 15.37 | 14.73 | 15.92 | 0.16 |
| 350.1160 | 295.59 | 14.14 | 14.15 | 14.47 | 13.37 | 0.01 |
| 350.1190 | 53.34  | 14.64 | 16.39 | 15.95 | 15.74 | 0.79 |
| 350.1555 | 107.5  | 15.29 | 15.28 | 14.99 | 15.70 | 0.05 |
| 350.1774 | 22.61  | 18.08 | 10.39 | 10.99 | 12.64 | 1.95 |
| 350.2358 | 22.29  | 16.13 | 10.42 | 10.87 | 12.85 | 1.82 |
| 350.6441 | 28.59  | 15.43 | 17.27 | 16.50 | 17.44 | 0.85 |
| 350.7146 | 45.02  | 17.69 | 16.90 | 16.70 | 17.01 | 0.84 |
| 350.8034 | 45.85  | 14.31 | 13.41 | 13.68 | 14.37 | 0.47 |
| 350.8107 | 48.28  | 16.76 | 18.61 | 18.60 | 18.44 | 1.34 |
| 350.8398 | 28.05  | 13.77 | 11.18 | 14.78 | 13.81 | 0.27 |
| 350.8559 | 51.19  | 15.69 | 17.84 | 15.51 | 14.81 | 0.39 |
| 350.8687 | 42.48  | 15.32 | 16.12 | 15.75 | 16.93 | 0.58 |
| 350.8944 | 32.33  | 19.49 | 18.12 | 19.01 | 18.73 | 1.09 |
| 350.9280 | 51.45  | 20.73 | 20.10 | 21.00 | 19.65 | 0.30 |
| 350.9726 | 160.69 | 13.92 | 13.69 | 14.07 | 13.20 | 0.06 |
| 351.0250 | 38.24  | 16.04 | 14.62 | 16.81 | 15.74 | 0.21 |
| 351.0588 | 207.08 | 14.46 | 19.57 | 19.63 | 18.18 | 1.72 |
| 351.0779 | 148.02 | 15.61 | 17.97 | 16.75 | 16.43 | 0.98 |
| 351.0991 | 55.02  | 20.78 | 20.13 | 20.56 | 20.08 | 0.97 |
| 351.0993 | 114.63 | 13.92 | 16.52 | 13.61 | 15.97 | 0.45 |
| 351.1134 | 55.97  | 13.80 | 14.33 | 13.09 | 13.58 | 0.02 |
| 351.1504 | 33.84  | 15.29 | 17.63 | 15.61 | 17.67 | 0.66 |
| 351.1592 | 54.29  | 15.37 | 14.90 | 14.86 | 14.79 | 0.23 |
| 351.1930 | 43.79  | 18.12 | 16.51 | 16.11 | 16.52 | 1.36 |
| 351.2165 | 27.05  | 17.64 | 17.07 | 18.90 | 18.04 | 0.25 |
| 351.2262 | 22.35  | 13.70 | 14.78 | 13.14 | 14.97 | 0.20 |
| 351.2386 | 38.31  | 14.53 | 14.39 | 15.33 | 15.21 | 0.20 |
| 351.2889 | 23.29  | 16.41 | 13.32 | 14.39 | 15.60 | 1.00 |
| 351.5627 | 295.81 | 16.12 | 18.22 | 18.63 | 17.01 | 1.18 |
| 351.6519 | 28.71  | 15.33 | 17.06 | 15.43 | 17.32 | 0.51 |
| 351.7960 | 49.35  | 18.58 | 12.76 | 13.31 | 13.36 | 1.47 |
| 351.8971 | 35.95  | 16.52 | 13.57 | 13.74 | 13.99 | 1.33 |
| 351.9161 | 46.67  | 15.53 | 14.91 | 15.49 | 15.60 | 0.26 |
| 351.9312 | 48.71  | 16.59 | 16.08 | 16.62 | 16.02 | 0.20 |
| 351.9685 | 77.1   | 14.89 | 13.21 | 16.21 | 14.99 | 0.10 |
| 351.9879 | 71.05  | 19.48 | 18.13 | 18.76 | 18.68 | 0.86 |
| 352.0529 | 67.97  | 19.97 | 20.33 | 20.61 | 19.90 | 0.37 |
| 352.0632 | 194.75 | 15.31 | 17.10 | 17.75 | 17.71 | 1.26 |
| 352.1025 | 45.4   | 18.04 | 16.54 | 16.70 | 16.77 | 1.56 |
| 352.1933 | 20.9   | 17.66 | 13.38 | 11.59 | 12.45 | 1.52 |
| 352.2215 | 38.07  | 12.67 | 15.57 | 16.31 | 15.08 | 0.94 |
| 352.2337 | 22.71  | 15.93 | 18.27 | 16.33 | 17.90 | 0.80 |
| 352.3393 | 194.43 | 22.11 | 20.60 | 20.70 | 21.66 | 0.80 |
| 352.6598 | 28.43  | 14.99 | 17.28 | 16.44 | 17.87 | 0.92 |
| 352.6942 | 26.8   | 15.52 | 17.93 | 15.36 | 15.98 | 0.49 |
| 352.7356 | 22.51  | 15.35 | 16.78 | 14.99 | 16.61 | 0.37 |
| 352.8078 | 48.15  | 16.06 | 16.75 | 16.70 | 16.86 | 0.88 |
| 352.8527 | 58.47  | 15.03 | 14.61 | 14.80 | 14.33 | 0.17 |
| 352.8657 | 19.88  | 15.24 | 13.54 | 14.04 | 14.59 | 0.76 |
| 352.8962 | 47.47  | 17.33 | 17.94 | 18.61 | 18.65 | 0.78 |
| 352.9074 | 43.95  | 15.64 | 17.14 | 16.92 | 16.73 | 1.45 |
| 352.9243 | 51.66  | 17.09 | 15.50 | 15.60 | 14.89 | 0.65 |
| 352.9894 | 43.89  | 16.65 | 17.79 | 17.88 | 18.07 | 1.05 |

|          |        |       |       |       |       |      |
|----------|--------|-------|-------|-------|-------|------|
| 353.0135 | 52.68  | 14.06 | 13.81 | 12.01 | 12.66 | 0.47 |
| 353.0150 | 284.36 | 17.15 | 16.29 | 15.58 | 16.94 | 0.54 |
| 353.0388 | 54.88  | 17.32 | 16.48 | 18.41 | 17.50 | 0.03 |
| 353.0556 | 71.59  | 17.40 | 16.77 | 16.56 | 16.52 | 0.46 |
| 353.0664 | 201.2  | 15.96 | 17.14 | 17.55 | 17.71 | 0.98 |
| 353.0916 | 250.93 | 19.59 | 20.91 | 21.41 | 20.06 | 1.00 |
| 353.0967 | 49.79  | 16.43 | 11.17 | 12.57 | 13.33 | 1.24 |
| 353.2314 | 27.48  | 22.05 | 20.32 | 21.14 | 21.70 | 0.90 |
| 353.2419 | 22.49  | 16.14 | 18.33 | 16.18 | 18.01 | 0.71 |
| 353.2685 | 196.58 | 17.40 | 11.18 | 13.02 | 12.11 | 1.42 |
| 353.3426 | 286.7  | 19.95 | 18.48 | 18.28 | 19.54 | 0.94 |
| 353.5935 | 250.8  | 17.65 | 18.48 | 19.10 | 18.11 | 0.75 |
| 353.7435 | 22.49  | 15.60 | 17.35 | 15.67 | 17.05 | 0.55 |
| 353.7936 | 48.64  | 17.15 | 12.12 | 12.68 | 13.24 | 1.78 |
| 353.8820 | 50.15  | 18.62 | 16.40 | 17.24 | 15.07 | 0.80 |
| 353.8904 | 50.53  | 16.91 | 19.19 | 19.38 | 18.87 | 1.64 |
| 353.9003 | 45.04  | 15.59 | 16.83 | 15.20 | 16.12 | 0.41 |
| 353.9855 | 35.51  | 15.16 | 14.65 | 15.52 | 15.78 | 0.01 |
| 354.0111 | 66.69  | 17.99 | 17.23 | 17.02 | 17.63 | 0.46 |
| 354.0249 | 76.76  | 16.15 | 17.75 | 15.65 | 17.07 | 0.23 |
| 354.0466 | 60.59  | 16.22 | 15.30 | 16.73 | 15.82 | 0.15 |
| 354.0942 | 249.35 | 15.38 | 14.84 | 15.78 | 14.83 | 0.10 |
| 354.1819 | 149.49 | 10.60 | 14.62 | 14.45 | 14.17 | 1.26 |
| 354.2354 | 26.57  | 19.81 | 17.49 | 18.65 | 19.19 | 0.92 |
| 354.2497 | 22.44  | 15.86 | 18.15 | 15.93 | 17.68 | 0.78 |
| 354.2849 | 172.4  | 16.94 | 14.77 | 15.11 | 15.43 | 1.34 |
| 354.3364 | 159.92 | 17.49 | 14.59 | 14.55 | 15.97 | 1.57 |
| 354.3463 | 168.09 | 16.68 | 12.85 | 12.19 | 14.84 | 1.20 |
| 354.6552 | 28.2   | 15.14 | 17.94 | 17.11 | 17.27 | 1.06 |
| 354.6907 | 31.3   | 16.09 | 17.92 | 17.32 | 17.67 | 1.24 |
| 354.7545 | 43.69  | 18.31 | 19.14 | 18.98 | 19.07 | 0.80 |
| 354.8661 | 253.35 | 16.36 | 13.89 | 12.23 | 14.95 | 0.80 |
| 354.8930 | 45.59  | 16.48 | 17.78 | 18.66 | 18.50 | 1.49 |
| 354.9077 | 40.43  | 14.29 | 14.55 | 14.61 | 14.47 | 0.13 |
| 354.9458 | 30.46  | 16.98 | 15.75 | 15.52 | 15.42 | 0.99 |
| 354.9687 | 178.7  | 12.73 | 13.71 | 13.13 | 11.65 | 0.21 |
| 354.9851 | 51.98  | 17.39 | 17.12 | 17.80 | 17.08 | 0.02 |
| 354.9948 | 60.88  | 19.43 | 18.44 | 19.89 | 18.71 | 0.28 |
| 355.0377 | 297.81 | 11.07 | 14.56 | 14.56 | 11.37 | 0.94 |
| 355.0567 | 67.41  | 16.80 | 13.54 | 12.20 | 13.07 | 1.11 |
| 355.0731 | 224.02 | 16.95 | 22.51 | 23.06 | 21.02 | 1.64 |
| 355.1104 | 59.07  | 16.75 | 17.80 | 18.12 | 17.88 | 1.00 |
| 355.1550 | 53.54  | 16.85 | 17.32 | 16.64 | 17.17 | 0.15 |
| 355.1938 | 32.43  | 14.45 | 16.60 | 14.70 | 17.28 | 0.57 |
| 355.2382 | 26.32  | 15.48 | 11.39 | 13.95 | 15.14 | 0.82 |
| 355.2485 | 23.43  | 16.63 | 14.08 | 14.96 | 14.86 | 1.37 |
| 355.2578 | 22.56  | 15.01 | 16.66 | 14.88 | 15.75 | 0.42 |
| 355.2838 | 24.13  | 20.76 | 18.30 | 17.96 | 18.32 | 1.65 |
| 355.2843 | 159    | 20.58 | 18.44 | 18.76 | 20.31 | 0.47 |
| 355.5301 | 157.81 | 12.42 | 14.18 | 13.24 | 12.20 | 0.35 |
| 355.6361 | 30.07  | 15.67 | 14.23 | 17.05 | 17.00 | 0.02 |
| 355.6633 | 35.41  | 17.57 | 16.48 | 18.44 | 16.60 | 0.27 |
| 355.7592 | 22.51  | 13.82 | 15.52 | 12.30 | 14.96 | 0.18 |
| 355.8547 | 29.27  | 15.99 | 17.95 | 16.48 | 18.18 | 0.78 |
| 355.8785 | 46.45  | 17.89 | 16.28 | 16.27 | 16.12 | 1.13 |
| 355.8875 | 50.44  | 16.18 | 18.55 | 18.77 | 18.25 | 1.54 |

|          |        |       |       |       |       |      |
|----------|--------|-------|-------|-------|-------|------|
| 355.9319 | 48.96  | 15.62 | 16.40 | 16.88 | 15.78 | 0.61 |
| 355.9807 | 33.89  | 17.34 | 13.58 | 14.49 | 14.96 | 1.30 |
| 355.9967 | 72.97  | 15.99 | 14.78 | 17.15 | 16.23 | 0.06 |
| 356.0224 | 179.82 | 7.42  | 15.32 | 14.95 | 12.56 | 1.66 |
| 356.0580 | 198.78 | 14.54 | 17.60 | 17.59 | 17.90 | 1.25 |
| 356.0689 | 53.72  | 17.55 | 16.71 | 16.85 | 15.81 | 0.51 |
| 356.0773 | 237.52 | 13.29 | 18.65 | 19.35 | 18.11 | 1.67 |
| 356.1136 | 64.68  | 16.19 | 15.50 | 15.18 | 15.80 | 0.48 |
| 356.1249 | 63.14  | 14.98 | 11.72 | 13.79 | 16.79 | 0.79 |
| 356.1648 | 34.91  | 15.57 | 11.29 | 16.69 | 14.43 | 0.61 |
| 356.1901 | 34.7   | 7.95  | 15.19 | 13.92 | 16.47 | 1.18 |
| 356.2429 | 23.79  | 16.69 | 16.79 | 16.14 | 15.83 | 0.20 |
| 356.2616 | 22.68  | 15.36 | 13.37 | 14.29 | 14.05 | 0.84 |
| 356.2793 | 23.29  | 17.87 | 17.16 | 17.42 | 17.95 | 0.41 |
| 356.2870 | 22.74  | 18.69 | 14.29 | 14.79 | 15.19 | 1.89 |
| 356.2876 | 155.74 | 19.84 | 18.69 | 18.89 | 18.73 | 0.73 |
| 356.5266 | 27.28  | 15.62 | 19.81 | 18.35 | 19.62 | 1.72 |
| 356.7486 | 44.76  | 17.75 | 18.23 | 18.03 | 17.94 | 0.41 |
| 356.7559 | 47.53  | 17.07 | 18.17 | 18.13 | 17.89 | 1.11 |
| 356.8003 | 46.31  | 15.45 | 14.94 | 15.43 | 14.60 | 0.25 |
| 356.8607 | 25.49  | 12.34 | 19.09 | 18.12 | 18.21 | 1.68 |
| 356.8914 | 47.64  | 14.87 | 13.86 | 15.88 | 15.44 | 0.01 |
| 356.9090 | 27.96  | 16.33 | 9.06  | 10.23 | 10.55 | 1.80 |
| 356.9444 | 23.6   | 14.25 | 13.11 | 11.97 | 11.93 | 0.59 |
| 356.9533 | 68.18  | 17.51 | 16.19 | 16.70 | 16.48 | 0.75 |
| 356.9846 | 51.68  | 18.06 | 15.76 | 16.27 | 16.24 | 1.23 |
| 356.9924 | 58.45  | 16.44 | 14.78 | 16.44 | 15.69 | 0.36 |
| 357.0447 | 68.79  | 15.83 | 14.40 | 16.06 | 15.27 | 0.26 |
| 357.0554 | 290.02 | 16.39 | 16.83 | 17.19 | 16.57 | 0.58 |
| 357.0698 | 45.45  | 9.77  | 9.29  | 12.11 | 10.94 | 0.26 |
| 357.0701 | 235.7  | 12.38 | 18.42 | 18.93 | 16.96 | 1.60 |
| 357.0824 | 93.47  | 17.33 | 19.48 | 20.06 | 18.62 | 1.47 |
| 357.1224 | 76.21  | 15.39 | 15.28 | 15.81 | 15.48 | 0.06 |
| 357.1507 | 24.1   | 18.54 | 11.07 | 11.97 | 14.29 | 1.86 |
| 357.1745 | 26.91  | 15.95 | 21.62 | 16.80 | 16.34 | 0.93 |
| 357.2128 | 50.8   | 17.82 | 16.72 | 17.12 | 17.17 | 0.69 |
| 357.2496 | 56.88  | 19.35 | 21.11 | 20.59 | 20.53 | 1.27 |
| 357.2800 | 23.77  | 16.36 | 14.77 | 15.99 | 17.07 | 0.33 |
| 357.2996 | 23.89  | 19.00 | 15.93 | 16.07 | 16.84 | 1.60 |
| 357.2996 | 292.56 | 19.04 | 17.38 | 17.70 | 16.77 | 0.89 |
| 357.2999 | 158.95 | 19.33 | 17.15 | 17.08 | 16.96 | 1.38 |
| 357.6782 | 53.38  | 14.26 | 20.30 | 15.27 | 13.43 | 0.75 |
| 357.8609 | 44.94  | 15.37 | 14.48 | 15.01 | 14.75 | 0.40 |
| 357.8759 | 45.02  | 16.82 | 15.97 | 15.82 | 15.53 | 0.81 |
| 357.8841 | 50.16  | 15.26 | 15.73 | 15.44 | 15.78 | 0.35 |
| 357.9339 | 55.54  | 17.42 | 19.80 | 19.94 | 19.45 | 1.55 |
| 357.9625 | 73.48  | 9.39  | 16.61 | 12.32 | 14.62 | 1.21 |
| 358.0208 | 290.41 | 17.22 | 16.05 | 16.70 | 16.58 | 0.53 |
| 358.0209 | 73.95  | 16.92 | 15.57 | 15.22 | 15.63 | 0.95 |
| 358.0355 | 83.75  | 17.60 | 13.05 | 12.66 | 15.38 | 1.65 |
| 358.0750 | 79.15  | 18.47 | 18.23 | 19.12 | 18.20 | 0.07 |
| 358.1220 | 118.12 | 15.19 | 16.79 | 15.04 | 16.21 | 0.71 |
| 358.1325 | 23.55  | 13.25 | 16.41 | 10.83 | 15.14 | 0.23 |
| 358.1830 | 64.71  | 16.31 | 16.50 | 14.69 | 13.08 | 0.31 |
| 358.2555 | 37.35  | 19.54 | 20.98 | 20.25 | 20.13 | 1.14 |
| 358.2950 | 23.39  | 18.53 | 17.71 | 18.14 | 18.82 | 0.38 |



|          |        |       |       |       |       |      |
|----------|--------|-------|-------|-------|-------|------|
| 358.3027 | 23.98  | 16.89 | 9.60  | 10.37 | 10.87 | 1.72 |
| 358.5189 | 28.21  | 16.28 | 18.37 | 15.10 | 15.15 | 0.26 |
| 358.5933 | 306.39 | 15.83 | 18.37 | 18.28 | 16.64 | 1.32 |
| 358.7303 | 26.67  | 15.01 | 17.61 | 13.58 | 15.51 | 0.32 |
| 358.7462 | 44.9   | 16.21 | 16.46 | 16.06 | 16.56 | 0.12 |
| 358.7532 | 47.8   | 16.06 | 17.14 | 17.04 | 16.85 | 0.92 |
| 358.7760 | 301.41 | 15.33 | 15.85 | 15.49 | 15.36 | 0.32 |
| 358.7973 | 46.32  | 15.44 | 15.22 | 16.05 | 14.83 | 0.03 |
| 358.8347 | 46.08  | 16.16 | 16.44 | 16.69 | 16.90 | 0.36 |
| 358.8425 | 48.46  | 16.82 | 18.91 | 18.98 | 18.93 | 1.52 |
| 358.8531 | 23.04  | 13.93 | 17.82 | 10.46 | 11.01 | 0.03 |
| 358.9318 | 45.15  | 16.89 | 17.64 | 17.42 | 17.42 | 0.56 |
| 359.1558 | 65.15  | 17.36 | 18.14 | 18.11 | 17.76 | 0.80 |
| 359.1683 | 27.77  | 20.24 | 16.82 | 16.17 | 17.87 | 1.43 |
| 359.1889 | 26.66  | 16.14 | 18.54 | 15.95 | 19.43 | 0.62 |
| 359.2400 | 52.11  | 16.95 | 16.52 | 16.57 | 16.38 | 0.27 |
| 359.2617 | 24.52  | 16.31 | 17.74 | 16.64 | 16.50 | 0.52 |
| 359.2971 | 23.11  | 15.91 | 14.08 | 15.15 | 16.39 | 0.54 |
| 359.3151 | 25.45  | 21.30 | 18.25 | 18.66 | 18.06 | 1.80 |
| 359.3156 | 149.96 | 22.07 | 21.14 | 21.22 | 20.74 | 0.44 |
| 359.6387 | 27.13  | 16.31 | 18.44 | 14.97 | 15.11 | 0.20 |
| 359.6893 | 27     | 17.03 | 19.50 | 16.63 | 16.51 | 0.74 |
| 359.8356 | 50.28  | 17.26 | 20.32 | 20.57 | 19.83 | 1.63 |
| 359.9227 | 103.16 | 16.29 | 20.76 | 20.30 | 19.15 | 1.47 |
| 359.9331 | 47.86  | 15.39 | 14.94 | 15.47 | 15.54 | 0.13 |
| 359.9496 | 92.63  | 16.12 | 21.22 | 21.33 | 20.03 | 1.83 |
| 359.9622 | 44.92  | 10.68 | 15.19 | 15.77 | 15.04 | 1.28 |
| 359.9960 | 51.13  | 18.23 | 19.50 | 20.15 | 19.69 | 1.19 |
| 360.0096 | 48.11  | 19.49 | 19.69 | 20.12 | 19.64 | 0.36 |
| 360.0367 | 93.39  | 18.41 | 18.05 | 18.70 | 17.96 | 0.13 |
| 360.0459 | 81.98  | 15.22 | 15.43 | 14.22 | 15.43 | 0.15 |
| 360.0606 | 263.75 | 19.28 | 21.87 | 21.30 | 20.17 | 1.33 |
| 360.0628 | 60.86  | 15.96 | 16.45 | 16.68 | 16.50 | 0.31 |
| 360.1398 | 44.58  | 13.86 | 16.65 | 12.50 | 12.17 | 0.18 |
| 360.1700 | 22.23  | 17.86 | 12.24 | 13.04 | 14.02 | 1.87 |
| 360.1905 | 39.52  | 13.69 | 18.23 | 12.05 | 16.30 | 0.54 |
| 360.2217 | 30     | 16.64 | 17.88 | 16.54 | 17.99 | 0.42 |
| 360.2313 | 24.22  | 15.02 | 15.23 | 13.79 | 17.02 | 0.03 |
| 360.2741 | 24.5   | 19.98 | 22.12 | 20.79 | 20.54 | 1.05 |
| 360.3186 | 24.13  | 19.14 | 14.00 | 14.26 | 14.33 | 1.97 |
| 360.3187 | 288.91 | 20.88 | 19.14 | 19.26 | 18.69 | 0.96 |
| 360.3189 | 143.75 | 20.05 | 18.95 | 19.20 | 18.88 | 0.74 |
| 360.5848 | 263.76 | 15.21 | 16.37 | 16.72 | 15.94 | 1.11 |
| 360.6279 | 83.04  | 16.27 | 17.99 | 16.87 | 17.44 | 0.77 |
| 360.6890 | 81.92  | 13.27 | 15.02 | 16.30 | 14.90 | 0.56 |
| 360.7038 | 47.16  | 16.52 | 15.99 | 15.67 | 15.24 | 0.43 |
| 360.7951 | 45.93  | 14.48 | 13.59 | 14.01 | 13.35 | 0.37 |
| 360.8327 | 45.75  | 13.96 | 13.34 | 13.60 | 14.87 | 0.17 |
| 360.8399 | 47.35  | 15.79 | 18.43 | 18.53 | 18.49 | 1.54 |
| 360.9100 | 36.63  | 14.84 | 15.80 | 15.16 | 15.14 | 0.30 |
| 360.9286 | 39.19  | 16.11 | 17.25 | 17.03 | 16.75 | 0.51 |
| 360.9505 | 88.88  | 13.68 | 17.64 | 17.63 | 16.08 | 1.58 |
| 360.9993 | 52.56  | 19.13 | 15.98 | 17.89 | 17.34 | 1.04 |
| 361.0130 | 44.54  | 16.93 | 16.09 | 17.33 | 16.64 | 0.23 |
| 361.0601 | 62.11  | 16.41 | 16.27 | 17.24 | 16.00 | 0.11 |
| 361.0632 | 259.24 | 15.27 | 17.61 | 15.50 | 15.63 | 0.58 |

|          |        |       |       |       |       |      |
|----------|--------|-------|-------|-------|-------|------|
| 361.0734 | 68.97  | 15.49 | 14.28 | 14.78 | 14.26 | 0.52 |
| 361.1392 | 27.54  | 16.53 | 16.68 | 17.31 | 16.78 | 0.24 |
| 361.1689 | 51.6   | 16.93 | 16.54 | 16.53 | 16.05 | 0.32 |
| 361.1826 | 36.63  | 17.09 | 10.69 | 10.26 | 11.31 | 1.68 |
| 361.2752 | 24.21  | 19.41 | 19.26 | 18.13 | 17.89 | 0.56 |
| 361.6540 | 28.59  | 14.93 | 18.88 | 12.28 | 12.75 | 0.19 |
| 361.6988 | 29.73  | 15.31 | 18.07 | 16.95 | 17.43 | 1.29 |
| 361.8263 | 47.55  | 15.93 | 9.38  | 10.27 | 10.43 | 1.71 |
| 361.8326 | 50.27  | 17.73 | 20.44 | 20.66 | 19.86 | 1.57 |
| 361.9465 | 78.51  | 15.80 | 17.92 | 17.86 | 17.35 | 1.21 |
| 361.9537 | 90.35  | 15.00 | 14.76 | 14.50 | 14.61 | 0.24 |
| 362.0064 | 260.13 | 13.84 | 16.26 | 17.10 | 15.24 | 0.94 |
| 362.0339 | 68.33  | 16.02 | 16.62 | 15.18 | 16.08 | 0.01 |
| 362.1101 | 34.88  | 15.21 | 13.07 | 18.22 | 17.02 | 0.15 |
| 362.1677 | 71.66  | 16.76 | 16.31 | 16.69 | 15.58 | 0.23 |
| 362.2034 | 34.66  | 13.11 | 16.54 | 15.04 | 13.72 | 0.81 |
| 362.2366 | 23.31  | 16.63 | 18.39 | 16.19 | 18.17 | 0.55 |
| 362.2778 | 23.8   | 17.13 | 13.59 | 14.07 | 14.06 | 1.28 |
| 362.6120 | 31.83  | 15.32 | 12.98 | 16.27 | 15.40 | 0.36 |
| 362.7022 | 51.62  | 17.39 | 17.84 | 18.27 | 17.01 | 0.42 |
| 362.8367 | 48.73  | 15.40 | 15.43 | 15.39 | 15.69 | 0.06 |
| 362.9260 | 46.66  | 18.60 | 18.83 | 18.00 | 18.92 | 0.06 |
| 362.9501 | 40.32  | 15.17 | 16.31 | 16.54 | 16.53 | 1.12 |
| 362.9611 | 66.23  | 16.81 | 14.80 | 13.92 | 15.09 | 0.96 |
| 362.9884 | 270.25 | 16.81 | 17.50 | 17.43 | 17.05 | 0.30 |
| 362.9993 | 160.62 | 13.76 | 17.33 | 14.71 | 15.69 | 0.92 |
| 363.0183 | 132.25 | 11.93 | 15.51 | 13.28 | 14.50 | 0.84 |
| 363.0394 | 97.6   | 17.81 | 15.18 | 16.44 | 15.95 | 1.40 |
| 363.0476 | 83.87  | 15.53 | 19.35 | 18.84 | 18.41 | 1.76 |
| 363.1147 | 120.55 | 14.73 | 18.06 | 15.25 | 17.41 | 1.10 |
| 363.1511 | 99.69  | 12.98 | 14.43 | 10.85 | 14.13 | 0.02 |
| 363.1655 | 80.13  | 16.16 | 16.67 | 17.24 | 14.96 | 0.20 |
| 363.1764 | 27.37  | 15.64 | 17.97 | 18.12 | 18.68 | 1.48 |
| 363.2507 | 25.1   | 17.19 | 17.33 | 17.10 | 15.99 | 0.09 |
| 363.6780 | 27.42  | 14.95 | 16.59 | 16.04 | 17.73 | 0.68 |
| 363.7139 | 27.05  | 16.14 | 19.21 | 18.84 | 15.84 | 1.11 |
| 363.8293 | 49.85  | 16.47 | 18.89 | 19.16 | 18.39 | 1.58 |
| 363.9191 | 51.88  | 18.28 | 19.21 | 19.22 | 18.85 | 0.88 |
| 363.9450 | 50.41  | 16.50 | 15.62 | 17.16 | 16.13 | 0.13 |
| 364.0395 | 50.83  | 15.89 | 13.70 | 15.76 | 15.00 | 0.51 |
| 364.0651 | 253.1  | 22.75 | 25.94 | 26.42 | 23.68 | 1.25 |
| 364.2321 | 26.22  | 14.46 | 16.02 | 12.76 | 16.50 | 0.15 |
| 364.2520 | 23.81  | 16.51 | 17.96 | 17.30 | 17.57 | 1.02 |
| 364.5268 | 27.27  | 15.11 | 19.21 | 17.62 | 18.89 | 1.60 |
| 364.5964 | 294.49 | 14.46 | 17.58 | 17.76 | 15.92 | 1.52 |
| 364.6983 | 50.23  | 16.71 | 16.63 | 16.59 | 16.55 | 0.10 |
| 364.7347 | 23.78  | 11.84 | 14.76 | 10.49 | 14.61 | 0.42 |
| 364.7877 | 47.45  | 16.99 | 18.81 | 18.84 | 18.49 | 1.50 |
| 364.8135 | 47.55  | 14.92 | 13.06 | 15.08 | 14.03 | 0.41 |
| 364.8398 | 40.92  | 17.15 | 17.87 | 17.94 | 17.08 | 0.66 |
| 364.8607 | 38.31  | 16.11 | 18.27 | 17.95 | 18.47 | 1.30 |
| 364.9045 | 122.22 | 15.55 | 15.75 | 10.89 | 16.22 | 0.49 |
| 364.9059 | 34.89  | 22.72 | 20.16 | 21.54 | 20.10 | 1.16 |
| 364.9232 | 40     | 14.03 | 14.92 | 15.24 | 16.21 | 0.49 |
| 364.9345 | 118.39 | 14.84 | 16.08 | 12.94 | 15.97 | 0.02 |
| 364.9671 | 39.23  | 13.18 | 15.08 | 13.97 | 14.75 | 0.59 |

|          |        |       |       |       |       |      |
|----------|--------|-------|-------|-------|-------|------|
| 364.9769 | 55.68  | 18.30 | 16.66 | 17.07 | 16.37 | 0.82 |
| 365.0019 | 52.87  | 17.87 | 15.66 | 17.27 | 16.80 | 0.96 |
| 365.0624 | 251.7  | 15.21 | 18.65 | 18.84 | 15.06 | 1.05 |
| 365.0678 | 236.81 | 18.90 | 22.07 | 22.66 | 20.61 | 1.51 |
| 365.0858 | 64.51  | 16.76 | 13.98 | 14.06 | 14.12 | 0.95 |
| 365.0976 | 284.28 | 14.26 | 15.88 | 16.24 | 15.63 | 0.99 |
| 365.1057 | 85.38  | 19.26 | 20.26 | 19.58 | 20.05 | 0.56 |
| 365.1123 | 66.64  | 16.60 | 17.96 | 17.90 | 17.87 | 1.02 |
| 365.1358 | 49.62  | 16.79 | 13.57 | 15.28 | 14.47 | 0.93 |
| 365.1573 | 31.59  | 18.55 | 19.21 | 18.70 | 19.73 | 0.50 |
| 365.1986 | 27.22  | 14.04 | 18.51 | 16.14 | 18.08 | 1.27 |
| 365.5331 | 27.48  | 15.57 | 18.37 | 16.18 | 18.00 | 0.85 |
| 365.8269 | 40.52  | 15.56 | 15.57 | 15.47 | 14.96 | 0.09 |
| 365.8709 | 32.22  | 14.96 | 19.18 | 18.54 | 18.77 | 1.57 |
| 365.9161 | 51.22  | 17.08 | 17.61 | 17.64 | 17.52 | 0.54 |
| 365.9309 | 19.43  | 14.78 | 14.71 | 14.36 | 14.95 | 0.13 |
| 365.9600 | 53.86  | 16.97 | 18.03 | 18.43 | 16.81 | 0.59 |
| 365.9839 | 85.86  | 14.32 | 14.88 | 14.89 | 13.90 | 0.14 |
| 366.0248 | 58.06  | 18.70 | 15.48 | 15.39 | 17.46 | 1.28 |
| 366.0570 | 98.08  | 17.39 | 19.06 | 19.02 | 18.26 | 0.70 |
| 366.0589 | 195.59 | 12.09 | 15.18 | 15.56 | 15.49 | 1.16 |
| 366.0696 | 263.18 | 15.96 | 20.09 | 20.54 | 18.53 | 1.59 |
| 366.0708 | 63.77  | 16.75 | 16.54 | 17.19 | 16.75 | 0.08 |
| 366.1088 | 83.21  | 16.43 | 16.20 | 15.50 | 16.50 | 0.29 |
| 366.1374 | 70.9   | 16.29 | 15.54 | 15.07 | 14.88 | 0.42 |
| 366.1390 | 299.5  | 13.44 | 15.88 | 16.18 | 14.82 | 1.10 |
| 366.1603 | 31.28  | 15.82 | 15.06 | 13.89 | 16.25 | 0.47 |
| 366.1922 | 28.54  | 12.58 | 18.07 | 17.59 | 17.33 | 1.63 |
| 366.2637 | 23.17  | 16.52 | 16.23 | 16.17 | 15.72 | 0.24 |
| 366.3364 | 22.45  | 15.30 | 14.41 | 14.20 | 14.33 | 0.54 |
| 366.5190 | 27.85  | 12.22 | 18.95 | 9.45  | 9.81  | 0.45 |
| 366.5847 | 299.47 | 15.72 | 16.92 | 17.37 | 17.05 | 1.01 |
| 366.6948 | 41.43  | 16.00 | 15.96 | 15.92 | 16.38 | 0.01 |
| 366.7156 | 58.69  | 13.30 | 17.21 | 11.50 | 11.97 | 0.28 |
| 366.7775 | 44.68  | 15.64 | 16.90 | 16.55 | 16.72 | 1.06 |
| 366.7847 | 47.49  | 17.21 | 18.96 | 18.99 | 18.69 | 1.60 |
| 366.8356 | 45.92  | 16.47 | 17.15 | 17.33 | 16.47 | 0.66 |
| 366.8580 | 45.44  | 15.16 | 14.25 | 16.15 | 15.28 | 0.03 |
| 366.8681 | 31.45  | 18.57 | 18.66 | 18.68 | 18.22 | 0.05 |
| 366.9020 | 52.77  | 20.57 | 17.78 | 19.15 | 17.55 | 1.13 |
| 366.9501 | 254.05 | 17.75 | 18.62 | 19.09 | 18.23 | 0.58 |
| 367.0036 | 134.53 | 11.29 | 14.11 | 14.61 | 13.48 | 0.93 |
| 367.0197 | 38.98  | 15.28 | 13.39 | 16.49 | 14.73 | 0.24 |
| 367.0435 | 139.58 | 14.69 | 15.65 | 13.86 | 13.30 | 0.02 |
| 367.0620 | 192.85 | 11.50 | 12.42 | 14.35 | 14.88 | 0.56 |
| 367.0731 | 252.47 | 14.22 | 14.24 | 14.86 | 13.17 | 0.04 |
| 367.0866 | 298.36 | 15.56 | 18.26 | 18.31 | 17.55 | 1.54 |
| 367.1394 | 91.9   | 20.82 | 22.22 | 21.78 | 21.35 | 0.84 |
| 367.1504 | 59.29  | 20.93 | 21.57 | 21.55 | 21.16 | 0.96 |
| 367.1831 | 109.75 | 14.94 | 14.44 | 15.71 | 14.96 | 0.03 |
| 367.1960 | 44.23  | 17.54 | 20.68 | 19.56 | 20.99 | 1.65 |
| 367.2454 | 51.59  | 17.46 | 13.79 | 15.03 | 14.97 | 1.26 |
| 367.2672 | 22.95  | 15.69 | 12.97 | 13.66 | 13.81 | 1.00 |
| 367.3356 | 293.83 | 18.57 | 17.53 | 17.73 | 17.59 | 0.52 |
| 367.3356 | 24.1   | 18.48 | 16.34 | 16.54 | 17.02 | 1.55 |
| 367.3359 | 158.78 | 19.04 | 16.67 | 16.55 | 17.13 | 1.28 |

|          |        |       |       |       |       |      |
|----------|--------|-------|-------|-------|-------|------|
| 367.4636 | 64.03  | 14.00 | 16.52 | 16.91 | 15.80 | 1.14 |
| 367.5357 | 187.47 | 12.80 | 15.67 | 15.32 | 13.92 | 0.97 |
| 367.5882 | 299.47 | 15.47 | 15.23 | 15.63 | 14.96 | 0.12 |
| 367.7146 | 63.74  | 11.95 | 15.87 | 16.76 | 15.95 | 1.19 |
| 367.8738 | 49.08  | 15.07 | 14.89 | 14.69 | 14.90 | 0.13 |
| 367.8899 | 45.85  | 15.33 | 15.26 | 15.70 | 15.86 | 0.15 |
| 367.9053 | 45.28  | 16.67 | 16.28 | 16.17 | 16.14 | 0.45 |
| 367.9454 | 134.77 | 10.63 | 14.07 | 15.94 | 14.47 | 1.10 |
| 367.9630 | 39.82  | 17.44 | 17.70 | 17.57 | 17.75 | 0.21 |
| 367.9999 | 50.38  | 17.76 | 18.38 | 19.06 | 17.73 | 0.78 |
| 368.0273 | 199.55 | 14.96 | 17.28 | 18.03 | 15.97 | 0.96 |
| 368.1427 | 89.64  | 17.49 | 18.56 | 17.77 | 17.73 | 0.51 |
| 368.1533 | 60.55  | 18.30 | 18.88 | 18.82 | 18.51 | 0.80 |
| 368.1971 | 24.87  | 15.32 | 18.41 | 16.55 | 18.38 | 1.27 |
| 368.2457 | 27.54  | 12.96 | 10.25 | 13.40 | 11.30 | 0.60 |
| 368.2588 | 23.62  | 15.59 | 11.46 | 13.98 | 15.21 | 1.06 |
| 368.2794 | 23.35  | 17.88 | 18.90 | 18.92 | 18.65 | 0.78 |
| 368.3390 | 23.48  | 16.68 | 11.77 | 13.29 | 13.24 | 1.41 |
| 368.3522 | 22.55  | 16.33 | 15.32 | 14.95 | 15.21 | 0.64 |
| 368.6165 | 90.33  | 18.75 | 15.78 | 16.01 | 15.78 | 1.17 |
| 368.6713 | 28.64  | 15.39 | 17.63 | 17.14 | 16.28 | 0.89 |
| 368.7807 | 47.09  | 15.46 | 17.53 | 17.45 | 17.25 | 1.53 |
| 368.8702 | 46.27  | 17.73 | 18.80 | 19.28 | 19.19 | 1.34 |
| 368.8989 | 52.26  | 17.77 | 13.79 | 14.53 | 14.10 | 1.62 |
| 368.9616 | 46.22  | 16.89 | 17.82 | 17.73 | 17.77 | 0.94 |
| 368.9869 | 33.89  | 14.95 | 14.27 | 16.29 | 15.49 | 0.13 |
| 369.0257 | 87.28  | 15.88 | 17.48 | 16.42 | 17.29 | 0.56 |
| 369.0325 | 64.18  | 16.34 | 15.87 | 16.21 | 15.40 | 0.31 |
| 369.1761 | 27.39  | 15.49 | 19.43 | 13.89 | 13.71 | 0.38 |
| 369.2108 | 33.05  | 15.27 | 19.12 | 17.39 | 18.78 | 1.34 |
| 369.2497 | 56.43  | 17.81 | 19.56 | 18.95 | 18.99 | 1.21 |
| 369.2634 | 294.2  | 17.23 | 15.10 | 15.58 | 15.19 | 0.83 |
| 369.2636 | 168.6  | 18.46 | 15.13 | 15.22 | 15.51 | 1.66 |
| 369.2824 | 23.25  | 15.67 | 15.70 | 15.97 | 15.67 | 0.08 |
| 369.2997 | 284.34 | 20.77 | 18.61 | 18.29 | 19.15 | 1.02 |
| 369.3512 | 30.98  | 25.64 | 23.56 | 23.59 | 24.08 | 1.76 |
| 369.6786 | 33.88  | 15.72 | 18.45 | 17.21 | 16.67 | 1.15 |
| 369.8631 | 47.49  | 17.65 | 19.42 | 19.68 | 18.97 | 1.34 |
| 369.8711 | 48     | 15.24 | 14.73 | 14.66 | 14.52 | 0.33 |
| 369.8859 | 66.02  | 15.73 | 16.77 | 16.72 | 16.69 | 0.69 |
| 369.9611 | 38.01  | 15.15 | 14.60 | 16.47 | 15.26 | 0.12 |
| 369.9850 | 62.83  | 17.13 | 16.36 | 16.73 | 16.82 | 0.37 |
| 369.9986 | 75.74  | 13.03 | 16.47 | 14.36 | 15.40 | 0.78 |
| 370.0209 | 272.97 | 17.49 | 18.49 | 19.09 | 18.24 | 1.22 |
| 370.0261 | 61.52  | 16.09 | 16.17 | 15.95 | 15.74 | 0.03 |
| 370.0401 | 140.11 | 13.20 | 16.35 | 14.44 | 14.00 | 0.65 |
| 370.0522 | 241.95 | 17.07 | 19.55 | 15.79 | 18.22 | 0.26 |
| 370.0662 | 294.15 | 14.80 | 15.18 | 15.62 | 15.08 | 0.42 |
| 370.0744 | 239.46 | 15.04 | 17.38 | 17.17 | 18.02 | 0.77 |
| 370.1720 | 121.77 | 11.53 | 10.62 | 13.90 | 13.41 | 0.25 |
| 370.1828 | 30.45  | 15.74 | 18.59 | 15.85 | 15.41 | 0.63 |
| 370.1969 | 67.02  | 15.54 | 17.82 | 17.60 | 16.80 | 1.20 |
| 370.2197 | 54.99  | 13.36 | 14.65 | 16.67 | 15.83 | 0.79 |
| 370.2559 | 37.6   | 17.90 | 18.92 | 18.06 | 18.68 | 0.65 |
| 370.2949 | 23.31  | 19.70 | 20.55 | 20.78 | 20.47 | 0.64 |
| 370.3032 | 291.15 | 18.85 | 16.10 | 16.31 | 16.30 | 1.30 |

|          |        |       |       |       |       |      |
|----------|--------|-------|-------|-------|-------|------|
| 370.3545 | 27.28  | 23.83 | 21.66 | 21.77 | 22.19 | 1.78 |
| 370.3546 | 269.19 | 23.50 | 22.24 | 21.99 | 22.11 | 0.94 |
| 370.6860 | 35.37  | 15.73 | 17.03 | 13.82 | 14.08 | 0.21 |
| 370.7328 | 46.84  | 16.97 | 17.80 | 17.75 | 17.46 | 1.29 |
| 370.7580 | 26.95  | 13.51 | 16.76 | 13.75 | 16.11 | 0.55 |
| 370.8319 | 109.44 | 15.69 | 15.44 | 16.86 | 15.36 | 0.11 |
| 370.8406 | 127.56 | 12.63 | 16.27 | 17.01 | 16.51 | 1.37 |
| 370.8682 | 48.91  | 17.00 | 18.27 | 19.05 | 18.72 | 1.66 |
| 370.9467 | 187.18 | 12.11 | 16.76 | 17.03 | 15.33 | 1.64 |
| 370.9584 | 52.43  | 17.13 | 15.58 | 16.15 | 15.97 | 1.00 |
| 370.9688 | 60.58  | 18.73 | 17.69 | 19.22 | 17.86 | 0.33 |
| 370.9831 | 89.53  | 13.63 | 19.32 | 19.10 | 16.73 | 1.43 |
| 371.0095 | 44.25  | 15.34 | 14.73 | 15.39 | 15.31 | 0.15 |
| 371.0360 | 282.05 | 17.70 | 20.66 | 19.69 | 19.91 | 1.14 |
| 371.0556 | 149.68 | 12.91 | 17.82 | 16.01 | 16.13 | 1.02 |
| 371.0772 | 226.32 | 15.97 | 16.91 | 18.81 | 18.64 | 0.69 |
| 371.0874 | 62.66  | 15.32 | 13.46 | 15.41 | 14.84 | 0.46 |
| 371.1011 | 46.28  | 17.98 | 16.53 | 17.28 | 17.24 | 0.82 |
| 371.1126 | 175.68 | 8.90  | 14.75 | 14.24 | 14.75 | 1.59 |
| 371.1132 | 83.35  | 17.60 | 16.45 | 16.71 | 17.35 | 0.82 |
| 371.1675 | 22.1   | 14.80 | 11.66 | 14.61 | 12.53 | 0.99 |
| 371.1869 | 102.93 | 17.17 | 15.00 | 15.88 | 16.10 | 1.09 |
| 371.2261 | 28.54  | 18.36 | 16.38 | 15.32 | 17.04 | 1.22 |
| 371.2643 | 34.2   | 17.36 | 18.64 | 17.61 | 18.65 | 0.76 |
| 371.2789 | 282.08 | 19.87 | 17.20 | 17.22 | 17.51 | 1.31 |
| 371.2800 | 22.29  | 18.19 | 13.54 | 14.77 | 15.51 | 1.80 |
| 371.2984 | 23.08  | 16.36 | 17.83 | 18.23 | 18.10 | 1.04 |
| 371.3303 | 294.29 | 17.21 | 15.32 | 15.70 | 14.07 | 0.80 |
| 371.3579 | 26.35  | 20.86 | 18.41 | 18.70 | 19.00 | 1.81 |
| 371.3583 | 156.9  | 19.54 | 17.21 | 17.31 | 17.56 | 1.66 |
| 371.4251 | 304.78 | 14.71 | 14.94 | 14.90 | 14.81 | 0.19 |
| 371.6042 | 282.04 | 18.45 | 23.66 | 24.77 | 23.11 | 1.84 |
| 371.6939 | 41.74  | 13.59 | 17.72 | 11.47 | 11.51 | 0.25 |
| 371.7164 | 23.32  | 14.99 | 17.64 | 15.09 | 16.58 | 0.72 |
| 371.7381 | 24.06  | 17.05 | 21.29 | 19.46 | 20.28 | 1.77 |
| 371.8613 | 50.4   | 16.31 | 18.96 | 19.22 | 18.36 | 1.62 |
| 371.9540 | 113.45 | 13.72 | 16.91 | 16.67 | 16.71 | 1.26 |
| 371.9839 | 78.43  | 15.61 | 15.77 | 15.30 | 15.30 | 0.05 |
| 372.0395 | 284.64 | 12.72 | 16.29 | 16.33 | 15.52 | 1.35 |
| 372.0613 | 78.05  | 16.74 | 17.73 | 16.64 | 17.93 | 0.29 |
| 372.0806 | 219.08 | 15.69 | 15.48 | 17.40 | 17.04 | 0.27 |
| 372.0909 | 68.94  | 18.58 | 19.30 | 20.10 | 19.31 | 0.93 |
| 372.0990 | 64.79  | 14.77 | 9.91  | 12.17 | 15.84 | 1.03 |
| 372.1060 | 280.4  | 16.63 | 21.66 | 23.08 | 21.43 | 1.84 |
| 372.1904 | 113.31 | 19.90 | 19.54 | 19.93 | 19.36 | 0.22 |
| 372.2044 | 113.8  | 8.85  | 16.50 | 15.94 | 15.45 | 1.77 |
| 372.2187 | 23.05  | 12.68 | 16.52 | 14.88 | 15.69 | 1.25 |
| 372.2308 | 25.73  | 14.34 | 13.44 | 10.70 | 15.59 | 0.44 |
| 372.2399 | 25.99  | 16.76 | 19.94 | 18.12 | 18.89 | 1.30 |
| 372.3107 | 24.23  | 22.40 | 22.99 | 23.00 | 22.36 | 0.35 |
| 372.3185 | 288.3  | 20.26 | 20.37 | 20.48 | 20.32 | 0.08 |
| 372.3188 | 145.77 | 19.79 | 19.63 | 19.34 | 19.23 | 0.21 |
| 372.3612 | 24.74  | 17.21 | 9.81  | 11.69 | 12.31 | 1.62 |
| 372.4551 | 115.8  | 9.95  | 13.97 | 14.47 | 12.97 | 1.10 |
| 372.5267 | 27.31  | 15.57 | 18.47 | 16.91 | 18.24 | 1.18 |
| 372.6016 | 281.06 | 15.38 | 19.31 | 20.67 | 18.73 | 1.74 |

|          |        |       |       |       |       |      |
|----------|--------|-------|-------|-------|-------|------|
| 372.7321 | 48.1   | 18.08 | 18.74 | 18.56 | 18.35 | 0.56 |
| 372.7460 | 26.14  | 17.70 | 21.22 | 19.67 | 20.81 | 1.75 |
| 372.7743 | 45.26  | 15.59 | 13.33 | 14.76 | 13.54 | 0.75 |
| 372.8649 | 44.5   | 13.31 | 14.99 | 16.75 | 16.48 | 1.02 |
| 372.9255 | 32.96  | 14.73 | 13.02 | 12.93 | 12.93 | 0.79 |
| 372.9612 | 48.73  | 18.01 | 16.53 | 16.74 | 16.57 | 1.13 |
| 373.0211 | 285.12 | 16.21 | 15.82 | 16.55 | 15.74 | 0.08 |
| 373.0414 | 53.44  | 16.72 | 17.10 | 17.56 | 17.44 | 0.58 |
| 373.0646 | 77.88  | 16.81 | 17.73 | 16.23 | 17.17 | 0.13 |
| 373.1036 | 285.77 | 14.92 | 17.49 | 18.74 | 17.16 | 1.53 |
| 373.1983 | 27.12  | 12.60 | 16.46 | 11.48 | 15.34 | 0.49 |
| 373.2478 | 25.88  | 17.10 | 19.78 | 18.00 | 19.42 | 1.36 |
| 373.2944 | 19.59  | 16.58 | 7.01  | 7.41  | 8.29  | 1.99 |
| 373.3135 | 23.07  | 20.29 | 20.67 | 20.75 | 20.17 | 0.26 |
| 373.3220 | 179.27 | 16.85 | 14.85 | 15.01 | 15.36 | 1.05 |
| 373.6050 | 237.2  | 17.42 | 17.32 | 18.44 | 17.01 | 0.24 |
| 373.7051 | 26.94  | 11.84 | 17.84 | 9.21  | 9.40  | 0.40 |
| 373.7508 | 24.55  | 15.90 | 17.50 | 17.16 | 17.30 | 1.15 |
| 373.8348 | 44.91  | 17.46 | 15.79 | 15.97 | 16.16 | 0.95 |
| 373.8583 | 49.54  | 15.23 | 16.23 | 16.49 | 16.09 | 1.10 |
| 373.8705 | 27.92  | 14.87 | 19.14 | 15.80 | 18.48 | 0.99 |
| 373.9092 | 41.23  | 17.48 | 17.45 | 17.90 | 17.30 | 0.18 |
| 373.9480 | 53.63  | 20.17 | 19.42 | 19.03 | 18.88 | 0.88 |
| 374.0379 | 56.27  | 18.69 | 19.44 | 19.46 | 18.78 | 0.65 |
| 374.0960 | 118.46 | 15.00 | 17.44 | 14.71 | 16.62 | 0.72 |
| 374.1060 | 239.66 | 13.47 | 13.81 | 13.99 | 13.32 | 0.09 |
| 374.1373 | 100.53 | 17.10 | 14.33 | 14.36 | 14.43 | 1.37 |
| 374.1992 | 56.75  | 16.02 | 17.21 | 17.03 | 16.71 | 0.55 |
| 374.2554 | 23.76  | 16.68 | 15.66 | 15.31 | 16.81 | 0.48 |
| 374.2900 | 23.19  | 14.55 | 13.71 | 12.53 | 13.23 | 0.64 |
| 374.3168 | 23.16  | 17.00 | 16.75 | 17.02 | 16.51 | 0.13 |
| 374.7270 | 46.87  | 16.57 | 17.50 | 17.43 | 17.05 | 1.06 |
| 374.7348 | 52.31  | 16.46 | 15.19 | 14.97 | 15.81 | 0.67 |
| 374.7715 | 45.18  | 15.05 | 14.12 | 15.24 | 14.08 | 0.25 |
| 374.8086 | 44.61  | 15.20 | 17.35 | 16.72 | 17.26 | 1.25 |
| 374.8165 | 47.63  | 16.91 | 19.02 | 19.14 | 18.92 | 1.78 |
| 374.8661 | 30.71  | 18.31 | 20.35 | 19.93 | 19.77 | 1.57 |
| 374.9057 | 38.11  | 17.44 | 17.56 | 17.17 | 17.15 | 0.08 |
| 374.9411 | 51.68  | 20.69 | 22.70 | 22.65 | 22.02 | 1.31 |
| 375.0139 | 53.05  | 17.44 | 15.70 | 15.36 | 15.82 | 0.96 |
| 375.0412 | 253.5  | 10.92 | 14.80 | 14.53 | 11.35 | 0.95 |
| 375.0539 | 86.14  | 17.11 | 19.57 | 19.57 | 19.20 | 1.26 |
| 375.0654 | 67.42  | 15.80 | 14.69 | 13.54 | 15.07 | 0.76 |
| 375.1887 | 75.99  | 17.09 | 16.99 | 17.12 | 16.99 | 0.03 |
| 375.2124 | 43.74  | 18.40 | 16.59 | 17.12 | 17.73 | 1.27 |
| 375.2242 | 59.81  | 16.52 | 17.27 | 17.42 | 17.34 | 0.76 |
| 375.5334 | 258.91 | 11.75 | 16.85 | 17.69 | 15.16 | 1.56 |
| 375.8095 | 50.94  | 18.29 | 19.47 | 19.80 | 19.05 | 1.01 |
| 375.8324 | 45.19  | 17.59 | 15.63 | 15.76 | 16.13 | 1.14 |
| 375.8724 | 35.66  | 11.38 | 15.80 | 15.53 | 14.81 | 1.18 |
| 375.8952 | 78.8   | 14.68 | 15.61 | 14.63 | 15.59 | 0.21 |
| 375.9075 | 49.64  | 16.35 | 15.35 | 15.66 | 15.62 | 0.97 |
| 375.9272 | 103.47 | 17.64 | 20.42 | 20.95 | 19.69 | 1.32 |
| 375.9364 | 43.65  | 16.51 | 18.53 | 18.17 | 18.23 | 1.60 |
| 375.9444 | 52.53  | 17.21 | 17.76 | 17.74 | 17.43 | 0.67 |
| 375.9700 | 50.3   | 18.55 | 18.69 | 19.58 | 18.99 | 0.46 |

|          |        |       |       |       |       |      |
|----------|--------|-------|-------|-------|-------|------|
| 376.0232 | 87.1   | 17.98 | 11.84 | 13.14 | 13.07 | 1.85 |
| 376.0520 | 64.26  | 19.58 | 19.68 | 19.76 | 20.15 | 0.19 |
| 376.1424 | 100.09 | 16.86 | 19.25 | 17.29 | 18.18 | 0.68 |
| 376.2591 | 24.25  | 22.81 | 22.88 | 22.97 | 22.29 | 0.01 |
| 376.6518 | 31.44  | 15.17 | 16.73 | 18.51 | 17.50 | 1.16 |
| 376.6777 | 46.24  | 17.26 | 16.40 | 16.49 | 16.16 | 0.74 |
| 376.7285 | 43.05  | 15.81 | 16.80 | 14.91 | 15.88 | 0.08 |
| 376.7571 | 27.37  | 15.71 | 17.50 | 18.73 | 17.09 | 1.30 |
| 376.8132 | 39.96  | 19.12 | 18.75 | 18.85 | 18.80 | 0.47 |
| 376.8653 | 34.07  | 16.05 | 18.41 | 17.91 | 17.92 | 1.41 |
| 376.8841 | 40.23  | 14.81 | 17.51 | 17.68 | 17.38 | 1.67 |
| 376.9022 | 30.69  | 17.53 | 17.40 | 17.71 | 17.52 | 0.01 |
| 376.9383 | 52.11  | 19.29 | 21.26 | 21.26 | 20.66 | 1.34 |
| 376.9769 | 60.41  | 18.85 | 16.87 | 18.72 | 17.27 | 0.64 |
| 377.0336 | 61.51  | 17.22 | 17.29 | 17.92 | 17.01 | 0.25 |
| 377.0523 | 71.2   | 15.88 | 15.43 | 15.23 | 16.57 | 0.22 |
| 377.0923 | 59.29  | 16.84 | 17.73 | 18.35 | 17.38 | 1.09 |
| 377.1458 | 91.53  | 20.56 | 22.31 | 21.36 | 21.38 | 0.94 |
| 377.1537 | 30.58  | 15.41 | 13.13 | 16.68 | 14.93 | 0.33 |
| 377.1919 | 27.59  | 13.18 | 14.15 | 16.05 | 16.93 | 0.71 |
| 377.2038 | 28.99  | 15.55 | 17.72 | 18.71 | 17.98 | 1.26 |
| 377.2290 | 26.81  | 16.62 | 16.93 | 17.42 | 16.47 | 0.24 |
| 377.2549 | 23.24  | 15.59 | 12.98 | 16.18 | 15.64 | 0.48 |
| 377.2625 | 24.17  | 20.67 | 20.52 | 20.68 | 20.08 | 0.13 |
| 377.7037 | 29.68  | 15.86 | 16.56 | 16.54 | 17.03 | 0.51 |
| 377.7295 | 28.1   | 17.18 | 18.73 | 18.61 | 17.21 | 0.98 |
| 377.7383 | 26.85  | 14.89 | 18.32 | 15.13 | 18.10 | 0.81 |
| 377.7568 | 26.26  | 13.26 | 16.95 | 13.26 | 16.10 | 0.73 |
| 377.7654 | 90.35  | 16.63 | 18.32 | 15.76 | 18.67 | 0.30 |
| 377.8065 | 49.58  | 18.43 | 19.66 | 20.00 | 19.17 | 0.99 |
| 377.9343 | 43.71  | 14.85 | 16.09 | 15.46 | 15.80 | 0.84 |
| 377.9410 | 60.3   | 15.78 | 15.84 | 15.62 | 15.87 | 0.01 |
| 377.9654 | 49.87  | 17.08 | 15.49 | 16.18 | 15.80 | 0.89 |
| 377.9937 | 49.29  | 15.40 | 15.28 | 15.81 | 16.00 | 0.12 |
| 378.0079 | 68.37  | 14.43 | 15.65 | 14.34 | 15.11 | 0.29 |
| 378.0101 | 239.31 | 14.33 | 16.19 | 17.95 | 15.98 | 1.05 |
| 378.0471 | 60.27  | 16.82 | 15.85 | 15.61 | 16.39 | 0.56 |
| 378.0571 | 82.49  | 17.92 | 21.40 | 22.08 | 20.72 | 1.61 |
| 378.0692 | 79.02  | 14.86 | 17.04 | 17.24 | 15.65 | 0.96 |
| 378.0711 | 268.66 | 19.58 | 22.41 | 21.71 | 20.66 | 1.32 |
| 378.1329 | 56.75  | 15.40 | 14.39 | 14.14 | 16.15 | 0.47 |
| 378.2086 | 21.82  | 18.90 | 12.43 | 13.04 | 14.71 | 1.93 |
| 378.2312 | 27.34  | 15.54 | 16.92 | 15.87 | 14.57 | 0.26 |
| 378.2406 | 28.26  | 15.38 | 16.17 | 11.48 | 15.84 | 0.31 |
| 378.2663 | 42.74  | 18.51 | 19.94 | 20.61 | 19.76 | 1.49 |
| 378.6747 | 46.57  | 18.06 | 17.73 | 17.78 | 17.25 | 0.38 |
| 378.7461 | 31.35  | 16.18 | 18.60 | 17.24 | 18.47 | 1.16 |
| 378.7656 | 24.19  | 15.66 | 18.20 | 17.93 | 17.84 | 1.33 |
| 378.8108 | 47.98  | 15.03 | 15.94 | 16.01 | 16.14 | 1.03 |
| 378.8960 | 305.88 | 13.18 | 17.55 | 16.92 | 13.58 | 1.38 |
| 378.8995 | 49.22  | 18.68 | 18.61 | 18.94 | 18.80 | 0.11 |
| 378.9241 | 43.31  | 16.83 | 17.89 | 17.92 | 17.72 | 0.81 |
| 378.9345 | 55.93  | 17.12 | 17.74 | 17.93 | 17.74 | 0.56 |
| 378.9476 | 28.91  | 14.98 | 13.20 | 13.78 | 13.77 | 0.51 |
| 378.9500 | 289.55 | 12.94 | 15.33 | 16.37 | 14.89 | 1.12 |
| 378.9905 | 50.05  | 16.59 | 16.42 | 16.51 | 16.57 | 0.10 |

|          |        |       |       |       |       |      |
|----------|--------|-------|-------|-------|-------|------|
| 379.0246 | 85.66  | 16.89 | 15.18 | 14.35 | 13.78 | 0.74 |
| 379.0437 | 258.15 | 11.93 | 14.21 | 11.57 | 11.00 | 0.28 |
| 379.0511 | 90.19  | 14.12 | 16.04 | 16.38 | 14.25 | 1.01 |
| 379.0584 | 85.57  | 16.33 | 18.01 | 18.78 | 17.68 | 1.29 |
| 379.0744 | 249.98 | 16.53 | 18.63 | 18.48 | 17.55 | 1.20 |
| 379.1041 | 272.56 | 14.93 | 16.35 | 15.89 | 15.97 | 0.67 |
| 379.1500 | 99.68  | 15.26 | 14.54 | 13.04 | 14.52 | 0.90 |
| 379.2487 | 24.89  | 15.94 | 16.85 | 15.44 | 17.08 | 0.25 |
| 379.2672 | 24.79  | 13.80 | 15.91 | 17.02 | 15.78 | 0.95 |
| 379.2831 | 25.25  | 20.39 | 19.59 | 20.08 | 19.82 | 0.40 |
| 379.5586 | 263.76 | 15.31 | 15.11 | 16.06 | 14.94 | 0.10 |
| 379.7049 | 43.94  | 13.55 | 17.30 | 10.06 | 10.30 | 0.01 |
| 379.8039 | 49.4   | 17.63 | 18.28 | 18.60 | 17.64 | 0.53 |
| 379.8488 | 44.93  | 17.41 | 15.60 | 15.02 | 15.52 | 1.20 |
| 379.8932 | 51.14  | 18.19 | 19.15 | 19.46 | 18.85 | 0.93 |
| 379.9034 | 79.15  | 15.21 | 18.47 | 18.74 | 18.09 | 1.30 |
| 380.0130 | 47.23  | 16.84 | 15.97 | 16.64 | 16.25 | 0.44 |
| 380.0552 | 84.26  | 16.20 | 18.20 | 18.96 | 17.81 | 1.44 |
| 380.0594 | 258.91 | 13.44 | 15.37 | 15.00 | 13.78 | 0.87 |
| 380.1120 | 68.84  | 16.05 | 19.38 | 19.45 | 18.20 | 1.50 |
| 380.2076 | 32.87  | 15.13 | 16.77 | 15.70 | 15.68 | 0.42 |
| 380.2278 | 28.78  | 16.56 | 19.02 | 18.95 | 18.43 | 1.46 |
| 380.2869 | 24.18  | 18.38 | 16.69 | 17.54 | 17.51 | 0.71 |
| 380.4094 | 260.49 | 13.45 | 14.89 | 15.95 | 13.48 | 0.72 |
| 380.5269 | 27.29  | 12.92 | 17.98 | 14.06 | 17.41 | 1.02 |
| 380.6720 | 46.62  | 17.85 | 17.10 | 17.35 | 16.82 | 0.59 |
| 380.7127 | 27.15  | 14.42 | 22.98 | 12.00 | 11.93 | 0.58 |
| 380.7284 | 33.77  | 15.81 | 18.78 | 17.58 | 17.57 | 0.74 |
| 380.7612 | 44.03  | 17.29 | 18.86 | 18.79 | 18.39 | 1.74 |
| 380.7696 | 48.82  | 16.60 | 15.80 | 16.87 | 17.39 | 0.08 |
| 380.8342 | 44.1   | 15.21 | 17.94 | 19.03 | 17.41 | 1.31 |
| 380.8352 | 162.46 | 9.59  | 14.88 | 13.85 | 14.06 | 1.66 |
| 380.8603 | 40.9   | 12.52 | 15.40 | 11.65 | 16.94 | 0.40 |
| 380.8975 | 46.98  | 15.71 | 16.49 | 16.28 | 16.49 | 0.33 |
| 380.9210 | 37.05  | 14.56 | 14.61 | 15.57 | 15.06 | 0.32 |
| 380.9394 | 42.05  | 14.17 | 18.59 | 18.44 | 17.71 | 1.81 |
| 380.9509 | 56.23  | 16.50 | 14.37 | 15.50 | 13.60 | 0.66 |
| 380.9763 | 139.23 | 15.14 | 16.07 | 17.00 | 16.32 | 0.68 |
| 380.9840 | 256.79 | 15.07 | 15.71 | 14.85 | 14.92 | 0.09 |
| 380.9996 | 160.83 | 12.89 | 14.02 | 13.02 | 12.85 | 0.19 |
| 381.0393 | 48.96  | 12.98 | 11.59 | 13.80 | 13.64 | 0.09 |
| 381.0738 | 82.98  | 14.80 | 16.08 | 15.93 | 15.36 | 0.60 |
| 381.0896 | 222.16 | 15.36 | 22.20 | 22.71 | 20.86 | 1.58 |
| 381.1100 | 46.44  | 16.83 | 16.42 | 16.87 | 16.67 | 0.12 |
| 381.1157 | 63.58  | 14.31 | 15.82 | 15.88 | 15.23 | 0.64 |
| 381.1591 | 43.44  | 15.87 | 15.02 | 15.65 | 16.04 | 0.28 |
| 381.2142 | 30.94  | 12.08 | 21.64 | 12.43 | 13.42 | 0.97 |
| 381.2981 | 42.47  | 19.87 | 16.48 | 17.04 | 16.81 | 1.61 |
| 381.3512 | 24.17  | 17.16 | 12.52 | 13.95 | 13.63 | 1.40 |
| 381.7156 | 26.94  | 15.69 | 19.52 | 15.48 | 14.41 | 0.60 |
| 381.7408 | 26.92  | 17.93 | 21.45 | 19.83 | 21.01 | 1.77 |
| 381.8008 | 49.02  | 14.58 | 13.67 | 15.00 | 13.62 | 0.16 |
| 381.8449 | 46.88  | 17.29 | 15.85 | 15.49 | 16.12 | 1.11 |
| 381.8903 | 55.1   | 16.74 | 17.81 | 18.20 | 17.50 | 0.93 |
| 381.9013 | 90.15  | 13.62 | 16.64 | 16.55 | 16.00 | 1.12 |
| 381.9337 | 64.39  | 16.09 | 15.16 | 16.27 | 14.46 | 0.28 |



|          |        |       |       |       |       |      |
|----------|--------|-------|-------|-------|-------|------|
| 381.9610 | 113.36 | 14.66 | 15.95 | 15.88 | 16.11 | 0.66 |
| 381.9781 | 52.59  | 17.47 | 16.42 | 16.70 | 16.84 | 0.96 |
| 382.0099 | 66.09  | 13.55 | 13.43 | 15.15 | 13.77 | 0.15 |
| 382.0393 | 65.63  | 15.84 | 16.30 | 16.61 | 16.36 | 0.37 |
| 382.0931 | 233.5  | 12.85 | 18.78 | 19.29 | 17.96 | 1.68 |
| 382.0933 | 112.11 | 11.38 | 13.62 | 13.23 | 14.73 | 0.88 |
| 382.2425 | 24.86  | 17.29 | 20.23 | 18.43 | 19.78 | 1.56 |
| 382.2585 | 23.58  | 16.74 | 16.56 | 16.60 | 15.99 | 0.16 |
| 382.3010 | 46.48  | 17.48 | 13.03 | 13.67 | 13.84 | 1.84 |
| 382.6693 | 46.61  | 16.71 | 15.69 | 15.32 | 14.93 | 0.94 |
| 382.7302 | 25.76  | 13.86 | 16.16 | 11.93 | 13.82 | 0.12 |
| 382.7440 | 25.97  | 14.84 | 16.41 | 12.50 | 15.07 | 0.04 |
| 382.7586 | 46.99  | 17.50 | 18.94 | 18.98 | 18.61 | 1.68 |
| 382.7666 | 48.73  | 17.32 | 17.94 | 17.89 | 18.16 | 0.43 |
| 382.8344 | 36.06  | 15.16 | 16.92 | 18.10 | 16.43 | 0.95 |
| 382.8467 | 34.95  | 17.07 | 15.50 | 16.78 | 16.23 | 0.79 |
| 382.9181 | 35.65  | 15.00 | 16.09 | 16.03 | 16.10 | 0.92 |
| 382.9362 | 283.55 | 17.58 | 12.79 | 13.22 | 13.87 | 1.22 |
| 382.9365 | 47.7   | 13.56 | 15.54 | 15.07 | 13.68 | 0.55 |
| 382.9737 | 44.12  | 16.91 | 14.78 | 15.22 | 15.08 | 1.00 |
| 382.9816 | 239.98 | 15.37 | 16.03 | 14.23 | 15.98 | 0.01 |
| 383.0390 | 253.7  | 11.94 | 16.66 | 15.82 | 12.75 | 1.21 |
| 383.0412 | 62.11  | 14.72 | 14.49 | 15.52 | 13.81 | 0.03 |
| 383.0771 | 196.1  | 12.05 | 14.60 | 14.65 | 13.88 | 0.80 |
| 383.0776 | 65.96  | 14.12 | 14.78 | 14.93 | 14.96 | 0.30 |
| 383.0854 | 234.31 | 15.74 | 17.94 | 18.70 | 17.18 | 1.48 |
| 383.1310 | 60.69  | 17.05 | 15.73 | 15.87 | 15.30 | 0.78 |
| 383.1534 | 50.03  | 15.30 | 15.96 | 16.19 | 16.15 | 0.49 |
| 383.1665 | 23.58  | 19.11 | 10.78 | 13.13 | 15.28 | 1.65 |
| 383.1885 | 23.85  | 16.28 | 16.13 | 14.14 | 16.72 | 0.29 |
| 383.2193 | 44.48  | 17.88 | 16.23 | 16.64 | 15.44 | 0.78 |
| 383.2621 | 23.06  | 12.91 | 12.11 | 12.60 | 12.89 | 0.24 |
| 383.2790 | 292.65 | 18.74 | 16.39 | 16.42 | 16.69 | 1.19 |
| 383.3153 | 21.89  | 16.97 | 11.67 | 12.59 | 12.97 | 1.79 |
| 383.3155 | 289.28 | 19.20 | 16.83 | 16.82 | 16.33 | 1.24 |
| 383.3305 | 23.63  | 19.18 | 18.44 | 18.11 | 18.08 | 0.83 |
| 383.3307 | 154.37 | 19.98 | 19.19 | 19.37 | 19.09 | 0.27 |
| 383.3669 | 24.73  | 18.22 | 13.38 | 14.03 | 14.32 | 1.37 |
| 383.3671 | 184.04 | 17.28 | 12.84 | 13.38 | 14.61 | 1.24 |
| 383.7318 | 54.14  | 15.58 | 15.18 | 15.73 | 14.98 | 0.11 |
| 383.7381 | 26.32  | 15.86 | 19.86 | 18.15 | 18.66 | 1.41 |
| 383.8451 | 49.6   | 15.63 | 13.31 | 12.88 | 13.35 | 1.15 |
| 383.8640 | 44.71  | 16.92 | 16.53 | 16.48 | 16.77 | 0.42 |
| 383.8720 | 48.22  | 14.53 | 12.69 | 14.88 | 14.42 | 0.29 |
| 383.9258 | 35.95  | 15.37 | 15.87 | 16.36 | 15.79 | 0.60 |
| 383.9396 | 29.13  | 16.51 | 17.19 | 17.43 | 16.92 | 0.86 |
| 383.9738 | 50.27  | 16.63 | 17.60 | 18.73 | 16.60 | 0.62 |
| 383.9990 | 73.6   | 18.19 | 19.29 | 19.86 | 19.09 | 1.11 |
| 384.0994 | 294.56 | 15.17 | 16.01 | 15.04 | 14.89 | 0.20 |
| 384.1151 | 50.33  | 19.09 | 19.78 | 19.90 | 19.77 | 0.59 |
| 384.1699 | 23.36  | 17.02 | 11.05 | 11.58 | 12.29 | 1.99 |
| 384.2402 | 26.01  | 14.67 | 18.64 | 18.51 | 17.89 | 1.81 |
| 384.2740 | 25.4   | 18.81 | 20.12 | 19.78 | 19.45 | 0.91 |
| 384.2826 | 216.57 | 16.71 | 9.59  | 9.95  | 12.14 | 1.53 |
| 384.3106 | 22.9   | 16.07 | 14.22 | 14.40 | 15.09 | 0.98 |
| 384.3339 | 21.07  | 17.57 | 14.30 | 14.87 | 14.78 | 1.65 |

|          |        |       |       |       |       |      |
|----------|--------|-------|-------|-------|-------|------|
| 384.3340 | 292.78 | 19.03 | 18.88 | 19.06 | 18.16 | 0.10 |
| 384.3341 | 151.4  | 18.81 | 18.34 | 18.30 | 18.17 | 0.36 |
| 384.7449 | 32.05  | 18.83 | 23.03 | 21.46 | 22.05 | 1.80 |
| 384.7563 | 47.06  | 16.17 | 17.29 | 17.69 | 17.23 | 1.09 |
| 384.7638 | 48.89  | 15.48 | 16.50 | 16.93 | 17.08 | 0.47 |
| 384.8064 | 46.88  | 12.38 | 13.05 | 14.41 | 12.45 | 0.43 |
| 384.8442 | 46.96  | 18.06 | 18.65 | 19.04 | 18.83 | 1.19 |
| 384.9235 | 20.06  | 14.74 | 16.70 | 17.30 | 16.35 | 1.32 |
| 384.9354 | 47.45  | 16.69 | 16.97 | 16.72 | 16.75 | 0.16 |
| 384.9674 | 49.84  | 22.14 | 22.69 | 22.30 | 21.46 | 0.16 |
| 385.1188 | 43.57  | 15.63 | 15.74 | 15.81 | 16.03 | 0.08 |
| 385.1289 | 77.87  | 22.06 | 22.41 | 22.34 | 22.25 | 0.54 |
| 385.1830 | 23.85  | 17.81 | 12.21 | 12.45 | 13.92 | 1.89 |
| 385.2454 | 41.25  | 17.49 | 21.97 | 20.83 | 21.03 | 1.88 |
| 385.2754 | 26.77  | 19.10 | 16.96 | 18.18 | 18.23 | 0.84 |
| 385.3461 | 24.27  | 19.45 | 17.60 | 17.21 | 17.46 | 1.46 |
| 385.3462 | 283.06 | 21.57 | 21.19 | 20.75 | 21.11 | 0.26 |
| 385.3465 | 151.47 | 20.43 | 19.68 | 19.13 | 19.64 | 0.49 |
| 385.5781 | 55.44  | 15.94 | 18.24 | 18.22 | 17.54 | 1.59 |
| 385.7540 | 28.69  | 21.21 | 25.42 | 23.88 | 24.93 | 1.89 |
| 385.8383 | 49.62  | 16.95 | 18.40 | 18.74 | 17.86 | 1.09 |
| 385.8628 | 45.5   | 16.30 | 15.56 | 15.38 | 15.95 | 0.52 |
| 385.9126 | 56.66  | 14.97 | 16.24 | 16.37 | 16.07 | 1.07 |
| 385.9251 | 19.97  | 14.14 | 15.18 | 15.80 | 15.19 | 1.08 |
| 385.9596 | 58.2   | 14.52 | 14.20 | 13.27 | 14.72 | 0.21 |
| 385.9732 | 53.36  | 17.92 | 17.98 | 17.49 | 17.11 | 0.23 |
| 386.0018 | 61.12  | 15.55 | 15.77 | 15.40 | 15.30 | 0.01 |
| 386.0154 | 305.01 | 14.74 | 15.87 | 15.05 | 14.51 | 0.26 |
| 386.0215 | 143.22 | 16.11 | 20.68 | 15.42 | 18.58 | 0.60 |
| 386.0471 | 256.75 | 17.69 | 20.81 | 19.92 | 19.21 | 1.13 |
| 386.0820 | 299.6  | 14.78 | 16.97 | 17.64 | 15.08 | 1.34 |
| 386.1261 | 74.11  | 14.07 | 13.09 | 12.40 | 13.70 | 0.55 |
| 386.1324 | 74     | 19.23 | 19.41 | 19.26 | 19.24 | 0.18 |
| 386.2554 | 29.52  | 20.13 | 24.27 | 22.73 | 23.68 | 1.87 |
| 386.2753 | 24.61  | 17.18 | 11.73 | 14.06 | 13.75 | 1.43 |
| 386.2892 | 23.7   | 19.89 | 21.72 | 20.72 | 20.39 | 0.88 |
| 386.3262 | 23.15  | 18.87 | 18.53 | 18.55 | 18.45 | 0.29 |
| 386.3494 | 288.44 | 19.82 | 18.50 | 18.31 | 18.59 | 0.84 |
| 386.3497 | 22.03  | 17.91 | 14.27 | 14.94 | 15.27 | 1.85 |
| 386.5833 | 300.13 | 13.66 | 14.73 | 15.45 | 12.72 | 0.52 |
| 386.7100 | 50.24  | 18.39 | 18.39 | 18.51 | 18.16 | 0.01 |
| 386.7597 | 30.55  | 19.02 | 22.04 | 20.66 | 22.22 | 1.46 |
| 386.8419 | 46.75  | 17.21 | 17.99 | 18.71 | 18.28 | 1.39 |
| 386.8948 | 51.02  | 14.53 | 15.87 | 16.74 | 15.14 | 0.54 |
| 386.9018 | 25.44  | 13.78 | 12.21 | 14.23 | 13.16 | 0.30 |
| 386.9327 | 46.7   | 16.35 | 15.25 | 16.07 | 16.03 | 0.50 |
| 386.9428 | 61.15  | 16.66 | 15.01 | 16.77 | 15.63 | 0.47 |
| 386.9629 | 73.31  | 19.03 | 19.78 | 19.54 | 18.93 | 0.53 |
| 386.9731 | 55.23  | 16.24 | 16.24 | 16.16 | 15.30 | 0.11 |
| 386.9859 | 66.26  | 16.66 | 19.82 | 19.82 | 18.61 | 1.53 |
| 387.0011 | 278.07 | 18.07 | 19.35 | 19.95 | 19.17 | 0.63 |
| 387.0096 | 273.02 | 14.62 | 16.84 | 17.21 | 15.91 | 1.13 |
| 387.0217 | 138.49 | 13.19 | 14.30 | 10.71 | 12.31 | 0.17 |
| 387.0301 | 138.04 | 11.80 | 17.27 | 13.31 | 14.59 | 1.06 |
| 387.0348 | 56.43  | 15.70 | 16.62 | 15.77 | 16.55 | 0.26 |
| 387.0508 | 251.66 | 13.40 | 16.50 | 15.06 | 14.80 | 1.15 |

|          |        |       |       |       |       |      |
|----------|--------|-------|-------|-------|-------|------|
| 387.1247 | 74.11  | 17.34 | 17.03 | 16.43 | 17.04 | 0.64 |
| 387.1798 | 24.47  | 17.59 | 16.09 | 16.87 | 17.28 | 0.74 |
| 387.1993 | 34.68  | 16.83 | 11.84 | 11.62 | 12.64 | 1.73 |
| 387.2626 | 25.18  | 17.88 | 20.55 | 19.29 | 20.84 | 1.41 |
| 387.2920 | 23.67  | 17.95 | 19.27 | 18.05 | 17.83 | 0.45 |
| 387.3295 | 23.01  | 16.10 | 14.58 | 15.36 | 15.55 | 0.55 |
| 387.5368 | 56.25  | 13.67 | 14.59 | 13.16 | 14.76 | 0.15 |
| 387.7056 | 48.29  | 15.48 | 17.60 | 13.81 | 13.82 | 0.06 |
| 387.7504 | 26.95  | 16.40 | 19.44 | 17.78 | 18.60 | 1.26 |
| 387.7656 | 24.13  | 16.64 | 18.13 | 16.97 | 18.33 | 0.69 |
| 387.7862 | 306.54 | 15.56 | 16.68 | 16.35 | 16.01 | 0.76 |
| 387.8355 | 49.79  | 16.85 | 18.05 | 18.38 | 17.44 | 0.93 |
| 387.9886 | 91.29  | 13.52 | 15.11 | 14.84 | 13.13 | 0.53 |
| 387.9964 | 299.23 | 14.49 | 17.56 | 17.90 | 15.78 | 1.51 |
| 388.0048 | 182.84 | 10.91 | 14.43 | 14.21 | 12.64 | 0.80 |
| 388.0138 | 184.78 | 13.73 | 15.28 | 14.44 | 14.21 | 0.61 |
| 388.0246 | 135.19 | 15.13 | 16.01 | 12.56 | 14.11 | 0.31 |
| 388.0311 | 264.28 | 12.64 | 12.89 | 15.56 | 12.11 | 0.37 |
| 388.0768 | 127.98 | 16.21 | 17.10 | 18.26 | 16.49 | 0.82 |
| 388.1094 | 274.95 | 14.99 | 17.93 | 17.85 | 17.16 | 1.49 |
| 388.1213 | 307.31 | 14.42 | 14.54 | 14.36 | 13.91 | 0.06 |
| 388.2533 | 26.21  | 20.11 | 18.18 | 16.86 | 18.33 | 1.49 |
| 388.3056 | 23.82  | 20.29 | 22.34 | 20.90 | 20.64 | 0.85 |
| 388.5760 | 57     | 13.43 | 14.98 | 15.03 | 15.26 | 0.57 |
| 388.6110 | 270.48 | 15.29 | 14.91 | 16.53 | 14.78 | 0.13 |
| 388.7074 | 47.43  | 19.18 | 22.38 | 19.47 | 19.09 | 0.94 |
| 388.7303 | 27.2   | 15.74 | 18.98 | 17.41 | 18.21 | 1.10 |
| 388.7482 | 43.51  | 16.81 | 15.09 | 16.98 | 16.36 | 0.43 |
| 388.8400 | 41.24  | 15.04 | 14.87 | 16.10 | 15.56 | 0.27 |
| 388.9296 | 142.24 | 12.15 | 11.10 | 13.59 | 11.56 | 0.01 |
| 388.9833 | 75.7   | 14.91 | 16.43 | 16.14 | 15.65 | 0.74 |
| 389.0155 | 57.53  | 16.79 | 15.64 | 16.37 | 15.82 | 0.69 |
| 389.1039 | 71.21  | 15.76 | 17.47 | 17.63 | 17.85 | 1.00 |
| 389.1214 | 88.1   | 15.22 | 17.74 | 15.87 | 16.51 | 0.67 |
| 389.1317 | 271.24 | 17.78 | 19.80 | 21.97 | 19.83 | 0.87 |
| 389.1342 | 58.11  | 17.70 | 16.53 | 17.01 | 16.30 | 0.86 |
| 389.1797 | 75.37  | 16.56 | 17.06 | 16.55 | 16.93 | 0.21 |
| 389.2030 | 48.07  | 14.62 | 13.44 | 16.38 | 17.03 | 0.18 |
| 389.2119 | 27.35  | 12.04 | 20.89 | 11.75 | 10.83 | 0.81 |
| 389.2321 | 25.73  | 14.78 | 15.81 | 15.94 | 17.02 | 0.50 |
| 389.2565 | 29.01  | 17.27 | 10.01 | 11.83 | 12.18 | 1.63 |
| 389.3078 | 23.44  | 18.00 | 19.98 | 18.45 | 18.30 | 0.82 |
| 389.7123 | 27.68  | 14.68 | 16.50 | 14.39 | 12.40 | 0.16 |
| 389.7184 | 26.78  | 17.54 | 20.04 | 17.31 | 17.12 | 0.82 |
| 389.7280 | 24.33  | 17.66 | 11.73 | 12.78 | 12.93 | 1.69 |
| 389.7383 | 24.51  | 17.14 | 20.54 | 18.87 | 20.07 | 1.73 |
| 389.7650 | 23.72  | 15.24 | 13.43 | 17.88 | 15.16 | 0.05 |
| 389.8322 | 49.45  | 14.25 | 15.54 | 15.63 | 14.52 | 0.59 |
| 389.8628 | 44.7   | 16.32 | 14.43 | 15.11 | 15.35 | 0.92 |
| 389.8840 | 41.62  | 17.67 | 17.29 | 17.05 | 17.11 | 0.68 |
| 389.9219 | 53.35  | 19.82 | 19.13 | 19.38 | 18.60 | 0.67 |
| 390.0115 | 59.52  | 18.50 | 19.13 | 19.31 | 18.42 | 0.52 |
| 390.1354 | 222.87 | 16.54 | 18.64 | 18.29 | 18.28 | 1.34 |
| 390.2183 | 55.89  | 15.16 | 18.99 | 17.47 | 16.17 | 1.41 |
| 390.2401 | 26.05  | 16.21 | 19.14 | 17.42 | 18.71 | 1.31 |
| 390.2653 | 26.14  | 15.06 | 12.15 | 16.84 | 13.90 | 0.32 |

|          |        |       |       |       |       |      |
|----------|--------|-------|-------|-------|-------|------|
| 390.3118 | 23.25  | 13.92 | 14.80 | 11.74 | 12.32 | 0.24 |
| 390.5778 | 284.65 | 16.09 | 18.44 | 19.72 | 18.09 | 1.52 |
| 390.6676 | 29.88  | 15.63 | 15.39 | 17.28 | 16.91 | 0.37 |
| 390.7047 | 48.34  | 18.62 | 18.96 | 18.88 | 18.65 | 0.25 |
| 390.7196 | 43.62  | 14.78 | 17.82 | 17.05 | 14.48 | 0.86 |
| 390.7457 | 40.55  | 17.20 | 17.82 | 17.57 | 17.65 | 0.38 |
| 390.7648 | 27.41  | 15.12 | 17.34 | 15.08 | 17.05 | 0.66 |
| 390.7732 | 46.72  | 17.46 | 19.52 | 20.61 | 19.72 | 1.58 |
| 390.7905 | 46.86  | 16.81 | 18.58 | 18.71 | 18.38 | 1.57 |
| 390.7985 | 48.62  | 16.94 | 18.52 | 18.50 | 18.64 | 0.97 |
| 390.8792 | 42.34  | 17.50 | 17.02 | 16.24 | 16.64 | 0.56 |
| 390.9151 | 51.04  | 20.74 | 22.46 | 22.69 | 21.89 | 1.14 |
| 390.9915 | 56.35  | 16.89 | 13.77 | 13.98 | 13.70 | 1.26 |
| 391.0243 | 60.07  | 20.54 | 19.17 | 20.27 | 18.87 | 0.84 |
| 391.0778 | 289.89 | 13.89 | 15.44 | 16.71 | 15.21 | 0.97 |
| 391.1050 | 303.02 | 15.13 | 15.13 | 15.33 | 14.56 | 0.01 |
| 391.1794 | 31.78  | 15.28 | 16.61 | 15.48 | 18.78 | 0.41 |
| 391.1879 | 31.09  | 16.30 | 16.60 | 16.62 | 16.95 | 0.17 |
| 391.2205 | 39.79  | 10.73 | 16.38 | 17.18 | 14.76 | 1.34 |
| 391.2478 | 25.33  | 14.37 | 17.22 | 14.53 | 17.15 | 0.71 |
| 391.2745 | 38.88  | 16.16 | 18.49 | 19.69 | 18.55 | 1.52 |
| 391.2840 | 280.72 | 22.74 | 22.95 | 22.75 | 22.10 | 0.00 |
| 391.2841 | 161.29 | 21.80 | 19.63 | 19.99 | 18.98 | 0.83 |
| 391.4376 | 263.58 | 14.94 | 15.11 | 16.02 | 14.95 | 0.37 |
| 391.5756 | 81.8   | 12.38 | 13.42 | 13.63 | 13.47 | 0.41 |
| 391.7538 | 26.92  | 15.43 | 18.56 | 16.97 | 18.25 | 1.18 |
| 391.7720 | 25.92  | 14.42 | 18.27 | 17.32 | 17.35 | 1.47 |
| 391.7823 | 44.83  | 18.85 | 18.08 | 19.08 | 18.14 | 0.31 |
| 391.8594 | 43.64  | 16.18 | 16.03 | 14.79 | 15.51 | 0.44 |
| 391.8791 | 46.61  | 17.00 | 16.34 | 16.09 | 16.06 | 0.90 |
| 391.8989 | 87.77  | 15.29 | 14.25 | 12.80 | 16.29 | 0.53 |
| 391.9186 | 51.84  | 17.38 | 17.58 | 17.91 | 17.20 | 0.27 |
| 391.9441 | 49.39  | 17.97 | 16.04 | 17.58 | 17.11 | 0.58 |
| 392.0218 | 39.38  | 15.32 | 15.06 | 16.22 | 14.34 | 0.03 |
| 392.0343 | 163.25 | 13.29 | 14.66 | 11.86 | 13.68 | 0.04 |
| 392.0559 | 95.02  | 10.54 | 15.60 | 12.95 | 14.01 | 1.06 |
| 392.0952 | 104.1  | 12.74 | 16.39 | 14.71 | 15.17 | 1.04 |
| 392.1164 | 100.85 | 15.84 | 19.33 | 18.07 | 18.12 | 1.03 |
| 392.2296 | 24.1   | 16.37 | 20.88 | 19.54 | 19.92 | 1.74 |
| 392.2549 | 24.61  | 12.89 | 16.83 | 16.77 | 16.64 | 1.07 |
| 392.2818 | 46.16  | 17.85 | 17.24 | 18.13 | 17.78 | 0.15 |
| 392.6514 | 45.82  | 17.79 | 16.50 | 16.67 | 16.33 | 1.04 |
| 392.7031 | 50.07  | 17.17 | 17.37 | 17.12 | 17.22 | 0.06 |
| 392.7319 | 24.54  | 18.09 | 19.99 | 18.55 | 19.40 | 1.07 |
| 392.7431 | 38.41  | 17.38 | 17.28 | 16.17 | 15.56 | 0.44 |
| 392.7618 | 26.89  | 15.00 | 18.38 | 17.20 | 18.14 | 1.38 |
| 392.7867 | 45.49  | 16.87 | 18.34 | 18.58 | 18.19 | 1.53 |
| 392.7956 | 48.09  | 17.47 | 18.97 | 18.90 | 19.03 | 0.95 |
| 392.8786 | 37.22  | 17.94 | 16.75 | 16.38 | 16.56 | 1.12 |
| 392.9121 | 51.75  | 19.68 | 21.26 | 21.52 | 20.70 | 1.13 |
| 392.9506 | 58.36  | 18.32 | 16.59 | 18.77 | 17.12 | 0.44 |
| 393.0077 | 61.25  | 15.88 | 15.95 | 16.72 | 15.36 | 0.17 |
| 393.0181 | 198.54 | 15.15 | 14.85 | 15.92 | 15.69 | 0.09 |
| 393.0584 | 255.04 | 13.60 | 13.77 | 14.94 | 12.65 | 0.17 |
| 393.1192 | 95.94  | 19.71 | 22.37 | 21.40 | 21.39 | 1.20 |
| 393.2220 | 25.04  | 18.62 | 15.35 | 14.24 | 16.84 | 1.26 |

|          |        |       |       |       |       |      |
|----------|--------|-------|-------|-------|-------|------|
| 393.2354 | 262.74 | 18.52 | 14.52 | 13.09 | 14.83 | 1.32 |
| 393.2357 | 124.47 | 18.46 | 16.70 | 17.40 | 16.75 | 0.62 |
| 393.2873 | 24.47  | 22.17 | 21.95 | 22.24 | 21.52 | 0.13 |
| 393.2975 | 55.9   | 20.85 | 20.27 | 20.55 | 20.22 | 1.11 |
| 393.7193 | 45     | 16.12 | 18.01 | 14.53 | 14.90 | 0.07 |
| 393.7399 | 29.61  | 21.05 | 22.17 | 21.01 | 22.14 | 0.73 |
| 393.7501 | 25.02  | 14.02 | 16.91 | 17.89 | 15.87 | 0.92 |
| 393.7804 | 49.13  | 18.74 | 17.85 | 18.12 | 16.92 | 0.44 |
| 393.8927 | 44.66  | 16.39 | 16.34 | 16.10 | 16.66 | 0.09 |
| 393.9153 | 50.96  | 15.54 | 15.41 | 15.65 | 15.41 | 0.03 |
| 394.0187 | 256.81 | 17.51 | 18.46 | 19.40 | 18.89 | 0.69 |
| 394.0338 | 268.7  | 15.86 | 17.48 | 14.67 | 17.41 | 0.16 |
| 394.0433 | 79.02  | 14.63 | 15.30 | 15.40 | 14.91 | 0.37 |
| 394.0490 | 262.01 | 15.31 | 16.22 | 17.03 | 15.85 | 0.59 |
| 394.1173 | 169.31 | 14.51 | 13.85 | 13.40 | 13.97 | 0.25 |
| 394.2425 | 26.37  | 20.07 | 21.28 | 20.34 | 21.19 | 0.86 |
| 394.2891 | 24.09  | 20.06 | 19.49 | 19.83 | 19.14 | 0.37 |
| 394.2987 | 42.3   | 18.91 | 18.24 | 18.61 | 18.73 | 0.61 |
| 394.5203 | 248.33 | 16.45 | 15.46 | 16.41 | 15.81 | 0.41 |
| 394.6486 | 45.78  | 18.62 | 17.46 | 18.05 | 17.63 | 0.77 |
| 394.7285 | 26.93  | 12.29 | 21.71 | 9.51  | 10.02 | 0.60 |
| 394.7474 | 29.58  | 18.48 | 21.27 | 19.69 | 20.84 | 1.49 |
| 394.7588 | 26.75  | 16.35 | 19.08 | 17.76 | 18.98 | 1.25 |
| 394.7753 | 25.26  | 14.69 | 16.36 | 17.67 | 13.29 | 0.56 |
| 394.7849 | 44.89  | 14.94 | 16.25 | 15.66 | 15.88 | 0.52 |
| 394.7924 | 48.62  | 16.98 | 17.75 | 17.75 | 18.07 | 0.65 |
| 394.8371 | 47.75  | 13.10 | 13.19 | 13.85 | 12.99 | 0.14 |
| 394.8740 | 49.16  | 17.89 | 17.08 | 17.53 | 17.62 | 0.63 |
| 394.9087 | 52.37  | 17.39 | 17.82 | 18.19 | 17.51 | 0.55 |
| 394.9229 | 24.77  | 15.69 | 14.85 | 15.28 | 14.96 | 0.31 |
| 394.9643 | 48.65  | 15.32 | 14.73 | 14.72 | 14.16 | 0.33 |
| 395.0253 | 65.56  | 18.28 | 19.53 | 19.64 | 20.16 | 0.58 |
| 395.0366 | 104.08 | 18.24 | 16.16 | 17.33 | 15.60 | 0.75 |
| 395.0953 | 303.31 | 13.90 | 16.73 | 16.49 | 14.59 | 1.23 |
| 395.1175 | 101.17 | 15.94 | 17.82 | 16.05 | 17.12 | 0.69 |
| 395.1302 | 292.3  | 16.39 | 19.18 | 19.27 | 18.58 | 1.66 |
| 395.1561 | 57.18  | 19.12 | 18.33 | 17.83 | 17.54 | 0.82 |
| 395.2208 | 62.26  | 15.67 | 15.66 | 17.37 | 15.46 | 0.24 |
| 395.2307 | 27.03  | 15.52 | 20.37 | 13.61 | 14.05 | 0.46 |
| 395.2501 | 25.41  | 17.75 | 20.12 | 18.45 | 19.55 | 1.37 |
| 395.2602 | 26.14  | 15.59 | 16.04 | 16.43 | 17.93 | 0.41 |
| 395.2766 | 41.91  | 19.35 | 17.21 | 17.04 | 16.60 | 1.30 |
| 395.2950 | 23.57  | 17.02 | 14.16 | 16.31 | 16.01 | 0.87 |
| 395.5262 | 56.35  | 15.99 | 17.17 | 16.95 | 17.72 | 0.52 |
| 395.6318 | 292.27 | 14.84 | 17.01 | 16.90 | 16.24 | 1.42 |
| 395.7351 | 26.02  | 15.40 | 17.46 | 12.85 | 13.91 | 0.08 |
| 395.7562 | 27.36  | 16.99 | 19.18 | 17.87 | 18.98 | 1.36 |
| 395.7668 | 27.1   | 17.14 | 19.72 | 18.74 | 19.62 | 1.45 |
| 395.7777 | 46.5   | 17.81 | 16.30 | 16.56 | 15.80 | 0.71 |
| 395.8671 | 50.45  | 17.81 | 17.99 | 18.48 | 17.60 | 0.26 |
| 395.8805 | 81.15  | 14.58 | 17.06 | 18.07 | 17.20 | 1.24 |
| 395.9870 | 45.46  | 16.21 | 13.89 | 13.92 | 14.03 | 0.93 |
| 396.0225 | 56.93  | 16.35 | 17.70 | 17.56 | 18.40 | 0.61 |
| 396.0510 | 50.33  | 15.70 | 13.51 | 15.38 | 15.04 | 0.62 |
| 396.0549 | 253.36 | 14.01 | 18.04 | 16.54 | 15.95 | 1.46 |
| 396.2391 | 24.77  | 14.30 | 16.07 | 14.18 | 15.84 | 0.39 |

|          |        |       |       |       |       |      |
|----------|--------|-------|-------|-------|-------|------|
| 396.2581 | 27.14  | 15.86 | 18.33 | 17.00 | 17.98 | 1.03 |
| 396.2686 | 26.63  | 15.57 | 18.43 | 17.49 | 18.25 | 1.56 |
| 396.2799 | 41.27  | 17.03 | 12.98 | 13.44 | 13.66 | 1.95 |
| 396.3105 | 23.23  | 18.55 | 19.11 | 19.26 | 19.06 | 0.46 |
| 396.5437 | 297.21 | 12.37 | 18.03 | 17.39 | 13.49 | 1.51 |
| 396.6464 | 45.85  | 18.43 | 17.58 | 17.71 | 17.37 | 0.97 |
| 396.7348 | 46.27  | 17.58 | 18.66 | 18.80 | 18.34 | 1.36 |
| 396.7445 | 40.13  | 18.00 | 20.19 | 19.31 | 19.60 | 1.07 |
| 396.7617 | 44.93  | 17.11 | 16.19 | 16.51 | 16.42 | 0.69 |
| 396.9230 | 43.87  | 14.99 | 14.37 | 15.16 | 14.31 | 0.14 |
| 396.9513 | 283.91 | 12.50 | 17.66 | 17.51 | 14.98 | 1.36 |
| 396.9606 | 270.17 | 20.04 | 20.05 | 20.53 | 20.56 | 0.16 |
| 396.9698 | 50.99  | 15.39 | 15.44 | 15.71 | 15.90 | 0.17 |
| 397.0130 | 52.18  | 15.59 | 14.44 | 15.15 | 15.15 | 0.37 |
| 397.0515 | 94.63  | 17.78 | 16.56 | 16.89 | 15.67 | 0.55 |
| 397.0595 | 47.09  | 17.69 | 15.77 | 14.90 | 15.28 | 1.01 |
| 397.2190 | 74.99  | 14.84 | 13.47 | 16.68 | 16.46 | 0.09 |
| 397.2476 | 26.48  | 11.94 | 18.94 | 17.39 | 17.38 | 1.65 |
| 397.2713 | 46.23  | 19.25 | 15.40 | 15.84 | 15.18 | 1.65 |
| 397.2948 | 176.39 | 17.80 | 13.38 | 14.10 | 13.97 | 1.60 |
| 397.3139 | 23.09  | 16.11 | 16.20 | 16.54 | 16.49 | 0.17 |
| 397.5534 | 92.04  | 13.42 | 13.38 | 15.57 | 13.96 | 0.23 |
| 397.6461 | 81.38  | 18.01 | 18.27 | 15.61 | 18.78 | 0.24 |
| 397.7539 | 25.69  | 18.07 | 22.64 | 21.11 | 21.77 | 1.87 |
| 397.8656 | 60.2   | 16.83 | 17.00 | 17.39 | 16.42 | 0.18 |
| 397.8797 | 112.12 | 13.61 | 15.70 | 14.22 | 16.25 | 0.64 |
| 397.8966 | 93.44  | 15.76 | 16.04 | 16.98 | 15.90 | 0.49 |
| 397.9152 | 69.2   | 15.22 | 18.48 | 18.34 | 18.15 | 1.52 |
| 397.9528 | 39.84  | 16.64 | 13.77 | 15.27 | 14.51 | 0.80 |
| 398.0035 | 63.84  | 15.68 | 13.71 | 17.66 | 16.05 | 0.05 |
| 398.0212 | 68.87  | 18.40 | 17.58 | 17.47 | 17.47 | 0.40 |
| 398.0331 | 54.11  | 23.09 | 24.49 | 24.35 | 24.08 | 1.47 |
| 398.1384 | 64.84  | 16.14 | 20.34 | 16.41 | 16.72 | 1.05 |
| 398.2405 | 31.37  | 18.73 | 17.36 | 17.68 | 17.46 | 0.69 |
| 398.2557 | 25.89  | 17.40 | 21.54 | 19.96 | 20.65 | 1.65 |
| 398.3263 | 23.09  | 21.88 | 22.58 | 22.20 | 21.77 | 0.31 |
| 398.6440 | 54.58  | 17.52 | 17.15 | 16.29 | 16.99 | 0.57 |
| 398.7358 | 46.41  | 19.45 | 20.45 | 20.41 | 20.10 | 0.98 |
| 398.7617 | 29.46  | 20.82 | 24.92 | 23.48 | 24.48 | 1.88 |
| 398.8974 | 24.48  | 16.29 | 11.37 | 11.93 | 12.35 | 1.99 |
| 398.9146 | 86.26  | 14.42 | 14.91 | 14.26 | 14.73 | 0.10 |
| 398.9941 | 87.16  | 16.16 | 22.11 | 22.09 | 20.65 | 1.58 |
| 399.0163 | 63.15  | 16.41 | 16.17 | 17.46 | 16.41 | 0.21 |
| 399.0306 | 54.12  | 15.31 | 14.50 | 13.90 | 14.28 | 0.54 |
| 399.0372 | 54.61  | 18.93 | 20.21 | 20.19 | 19.74 | 1.39 |
| 399.0757 | 56.08  | 17.82 | 18.14 | 18.56 | 16.84 | 0.18 |
| 399.1291 | 89.16  | 18.55 | 19.47 | 19.56 | 18.66 | 0.79 |
| 399.1446 | 94.05  | 22.55 | 24.60 | 24.57 | 24.16 | 1.43 |
| 399.2507 | 202.16 | 16.79 | 12.04 | 14.95 | 13.85 | 1.12 |
| 399.2635 | 29.59  | 19.61 | 23.86 | 22.36 | 23.32 | 1.86 |
| 399.3255 | 287.31 | 18.46 | 11.37 | 12.44 | 12.64 | 1.53 |
| 399.3259 | 163.13 | 18.31 | 11.98 | 12.69 | 13.50 | 1.69 |
| 399.3290 | 23.31  | 19.67 | 20.40 | 19.98 | 19.65 | 0.33 |
| 399.3470 | 209.41 | 16.67 | 7.98  | 9.85  | 11.27 | 1.68 |
| 399.6862 | 27.04  | 15.88 | 19.72 | 14.20 | 14.34 | 0.41 |
| 399.7701 | 28.86  | 19.37 | 23.07 | 21.69 | 22.77 | 1.87 |

|          |        |       |       |       |       |      |
|----------|--------|-------|-------|-------|-------|------|
| 399.7791 | 304.93 | 15.49 | 17.82 | 17.39 | 16.68 | 1.46 |
| 399.8916 | 46.34  | 15.32 | 16.10 | 16.31 | 16.25 | 0.72 |
| 399.9138 | 36.69  | 17.99 | 18.50 | 18.54 | 18.61 | 0.65 |
| 399.9470 | 47.88  | 16.86 | 14.40 | 15.94 | 13.18 | 0.62 |
| 399.9680 | 50.44  | 15.30 | 15.98 | 18.27 | 16.52 | 0.77 |
| 399.9705 | 128.96 | 9.15  | 13.14 | 10.59 | 12.99 | 0.81 |
| 399.9945 | 83.67  | 15.81 | 19.38 | 19.20 | 18.45 | 1.68 |
| 400.0291 | 53.07  | 20.15 | 21.48 | 21.42 | 20.98 | 1.42 |
| 400.0371 | 53.44  | 17.03 | 18.02 | 17.95 | 17.67 | 1.21 |
| 400.0509 | 179.68 | 13.57 | 13.64 | 14.62 | 14.84 | 0.22 |
| 400.1132 | 305.02 | 14.53 | 16.23 | 15.81 | 15.37 | 1.31 |
| 400.1333 | 82.41  | 14.23 | 15.23 | 14.80 | 12.69 | 0.15 |
| 400.2705 | 26.6   | 18.58 | 21.99 | 20.66 | 21.69 | 1.83 |
| 400.3419 | 24.93  | 24.97 | 25.22 | 24.99 | 24.35 | 0.02 |
| 400.4358 | 307.54 | 13.66 | 13.73 | 14.02 | 13.68 | 0.17 |
| 400.4477 | 308.27 | 12.95 | 13.84 | 13.55 | 13.33 | 0.58 |
| 400.7102 | 27.29  | 17.52 | 19.57 | 17.29 | 17.10 | 0.75 |
| 400.7299 | 44.38  | 16.92 | 18.16 | 17.94 | 17.68 | 1.27 |
| 400.7382 | 49.62  | 16.95 | 18.72 | 18.88 | 18.49 | 0.86 |
| 400.7579 | 33.96  | 15.81 | 18.90 | 17.71 | 18.49 | 1.55 |
| 400.7756 | 41.52  | 16.29 | 19.86 | 18.48 | 19.26 | 1.47 |
| 400.8176 | 45.21  | 19.10 | 18.82 | 19.06 | 18.55 | 0.33 |
| 400.8272 | 48.75  | 16.65 | 19.00 | 19.03 | 19.05 | 1.28 |
| 400.8820 | 89.64  | 13.70 | 16.20 | 17.55 | 16.37 | 1.00 |
| 400.9091 | 42.26  | 16.48 | 15.53 | 14.91 | 14.78 | 0.57 |
| 400.9185 | 48.58  | 16.53 | 16.54 | 16.38 | 16.78 | 0.02 |
| 400.9422 | 49.05  | 21.55 | 21.90 | 22.09 | 20.83 | 0.21 |
| 400.9915 | 86.52  | 15.98 | 18.93 | 18.86 | 18.24 | 1.64 |
| 400.9985 | 85.88  | 15.44 | 15.43 | 14.91 | 15.71 | 0.14 |
| 401.0324 | 53.56  | 16.02 | 16.54 | 16.18 | 16.10 | 0.30 |
| 401.1405 | 99.98  | 17.95 | 19.83 | 19.93 | 19.26 | 1.61 |
| 401.1501 | 93.41  | 15.71 | 17.83 | 17.64 | 17.19 | 1.26 |
| 401.2163 | 66.86  | 15.04 | 17.70 | 16.89 | 16.20 | 0.86 |
| 401.2564 | 27.06  | 15.89 | 17.55 | 17.28 | 17.18 | 1.02 |
| 401.3450 | 25.24  | 22.80 | 23.23 | 23.00 | 22.22 | 0.13 |
| 401.7172 | 27.11  | 13.50 | 19.65 | 10.93 | 10.93 | 0.41 |
| 401.7265 | 24.58  | 18.01 | 12.81 | 13.18 | 13.94 | 1.95 |
| 401.7382 | 23.54  | 17.51 | 21.34 | 19.80 | 20.97 | 1.81 |
| 401.7650 | 24.69  | 15.66 | 16.93 | 18.10 | 17.56 | 0.95 |
| 401.8120 | 49.51  | 16.82 | 16.19 | 16.32 | 14.96 | 0.37 |
| 401.8202 | 50     | 16.16 | 18.39 | 18.50 | 17.84 | 1.60 |
| 401.8893 | 45.08  | 14.77 | 14.88 | 15.19 | 14.93 | 0.15 |
| 401.9021 | 24.96  | 13.41 | 14.85 | 13.89 | 14.86 | 0.81 |
| 401.9109 | 47.03  | 14.43 | 14.39 | 13.64 | 14.25 | 0.16 |
| 401.9179 | 48.32  | 15.52 | 15.56 | 15.62 | 15.65 | 0.05 |
| 401.9468 | 51.65  | 17.37 | 17.25 | 17.31 | 16.42 | 0.17 |
| 401.9953 | 70.18  | 16.42 | 20.30 | 20.11 | 19.50 | 1.71 |
| 402.0121 | 272.77 | 17.80 | 19.08 | 19.01 | 17.65 | 0.50 |
| 402.0132 | 52.47  | 13.42 | 9.62  | 9.21  | 12.14 | 0.91 |
| 402.0212 | 251.38 | 14.04 | 17.10 | 15.32 | 14.71 | 0.87 |
| 402.1438 | 88.11  | 15.03 | 16.17 | 15.71 | 15.73 | 0.61 |
| 402.2253 | 33.7   | 15.74 | 17.11 | 10.24 | 11.23 | 0.51 |
| 402.2397 | 24.84  | 16.89 | 20.13 | 18.60 | 19.75 | 1.66 |
| 402.2674 | 23.52  | 14.09 | 12.95 | 16.75 | 14.14 | 0.16 |
| 402.3208 | 22.88  | 15.83 | 13.98 | 12.35 | 13.60 | 1.01 |
| 402.3448 | 285.31 | 18.70 | 11.99 | 12.46 | 13.34 | 1.48 |

|          |        |       |       |       |       |      |
|----------|--------|-------|-------|-------|-------|------|
| 402.3448 | 155.67 | 18.18 | 11.68 | 12.43 | 13.33 | 1.59 |
| 402.3478 | 23.19  | 19.79 | 19.99 | 19.86 | 19.22 | 0.03 |
| 402.6844 | 48.96  | 18.73 | 19.15 | 19.19 | 19.05 | 0.46 |
| 402.7323 | 43.16  | 17.70 | 20.89 | 17.17 | 17.33 | 0.63 |
| 402.7460 | 30.7   | 17.41 | 20.59 | 19.00 | 19.92 | 1.70 |
| 402.7641 | 25.25  | 17.26 | 21.37 | 19.51 | 20.56 | 1.70 |
| 402.7738 | 44.93  | 17.25 | 19.44 | 20.26 | 19.24 | 1.63 |
| 402.8154 | 44.76  | 18.96 | 18.49 | 18.97 | 18.25 | 0.47 |
| 402.8243 | 48.9   | 17.01 | 19.02 | 18.99 | 19.16 | 1.26 |
| 402.8670 | 43.14  | 14.75 | 13.44 | 14.86 | 13.77 | 0.34 |
| 402.8855 | 42.94  | 14.69 | 16.26 | 14.78 | 15.81 | 0.67 |
| 402.9161 | 46.54  | 16.52 | 16.73 | 16.58 | 16.84 | 0.14 |
| 402.9406 | 53.58  | 18.60 | 18.59 | 18.84 | 17.73 | 0.04 |
| 402.9610 | 67.3   | 17.19 | 19.66 | 19.59 | 19.26 | 1.60 |
| 402.9933 | 91.53  | 15.74 | 19.89 | 20.08 | 18.56 | 1.75 |
| 403.0107 | 54.78  | 17.83 | 16.24 | 15.63 | 17.96 | 0.55 |
| 403.0673 | 50.18  | 16.84 | 16.60 | 16.19 | 16.00 | 0.38 |
| 403.2303 | 38.7   | 14.54 | 19.34 | 12.48 | 12.40 | 0.31 |
| 403.2475 | 31.23  | 16.78 | 19.24 | 17.27 | 18.71 | 1.19 |
| 403.2654 | 25.61  | 16.52 | 20.19 | 18.28 | 19.49 | 1.68 |
| 403.2744 | 37.16  | 16.42 | 18.15 | 19.31 | 17.98 | 1.45 |
| 403.2836 | 24.07  | 19.22 | 18.11 | 18.78 | 18.99 | 0.40 |
| 403.3514 | 22.64  | 16.05 | 14.81 | 14.92 | 14.22 | 0.75 |
| 403.3555 | 182.43 | 17.39 | 13.48 | 13.62 | 14.37 | 1.39 |
| 403.7340 | 26.51  | 15.16 | 18.28 | 12.04 | 12.41 | 0.04 |
| 403.7540 | 24.61  | 17.02 | 19.95 | 18.46 | 19.64 | 1.61 |
| 403.7723 | 32.24  | 17.04 | 20.67 | 19.04 | 19.67 | 1.67 |
| 403.7809 | 22.74  | 14.76 | 12.65 | 17.08 | 14.47 | 0.06 |
| 403.8094 | 49.01  | 16.86 | 15.57 | 15.53 | 14.89 | 0.68 |
| 403.8172 | 49.86  | 16.17 | 18.82 | 18.94 | 18.33 | 1.72 |
| 403.9681 | 121.1  | 11.63 | 14.73 | 13.70 | 13.46 | 0.83 |
| 403.9923 | 75.99  | 14.75 | 17.75 | 17.28 | 16.71 | 1.36 |
| 404.0241 | 261.15 | 15.49 | 15.88 | 15.22 | 14.82 | 0.01 |
| 404.0886 | 55.59  | 14.96 | 16.40 | 15.98 | 16.38 | 0.90 |
| 404.0946 | 252.84 | 15.48 | 17.01 | 17.00 | 16.46 | 1.07 |
| 404.1447 | 49.35  | 16.69 | 16.01 | 15.72 | 15.57 | 0.49 |
| 404.2151 | 76.11  | 15.54 | 17.87 | 17.43 | 16.90 | 1.22 |
| 404.2279 | 28.62  | 13.98 | 18.05 | 17.94 | 17.22 | 1.46 |
| 404.2368 | 43.01  | 14.88 | 16.13 | 12.58 | 12.99 | 0.21 |
| 404.2555 | 33.26  | 16.42 | 18.74 | 16.90 | 18.47 | 1.13 |
| 404.2738 | 26     | 16.07 | 19.45 | 17.83 | 18.43 | 1.49 |
| 404.2865 | 23.96  | 17.71 | 13.47 | 16.56 | 16.35 | 1.08 |
| 404.6811 | 47.3   | 19.64 | 20.10 | 20.12 | 19.69 | 0.39 |
| 404.7564 | 23.68  | 12.95 | 16.03 | 18.01 | 16.14 | 1.40 |
| 404.7872 | 33.75  | 15.35 | 16.02 | 17.30 | 15.67 | 0.60 |
| 404.8125 | 44.78  | 17.24 | 16.31 | 17.07 | 16.21 | 0.65 |
| 404.8213 | 48.83  | 14.03 | 17.18 | 17.02 | 17.02 | 1.23 |
| 404.8704 | 24.15  | 13.33 | 11.99 | 13.67 | 13.12 | 0.25 |
| 404.9045 | 137.57 | 12.77 | 15.56 | 18.03 | 16.58 | 1.06 |
| 404.9525 | 44.55  | 16.37 | 17.25 | 17.46 | 17.72 | 0.93 |
| 404.9891 | 85.63  | 15.40 | 16.42 | 16.17 | 14.85 | 0.37 |
| 405.0099 | 291.03 | 18.09 | 12.87 | 13.21 | 14.66 | 1.08 |
| 405.0939 | 80.71  | 17.90 | 20.59 | 19.91 | 20.15 | 1.19 |
| 405.1058 | 71.13  | 17.94 | 18.97 | 18.90 | 18.03 | 0.72 |
| 405.1613 | 113.63 | 15.29 | 17.48 | 17.87 | 18.03 | 1.16 |
| 405.2119 | 76.96  | 16.64 | 19.46 | 18.95 | 17.79 | 1.34 |



|          |        |       |       |       |       |      |
|----------|--------|-------|-------|-------|-------|------|
| 405.2356 | 28.21  | 15.70 | 20.11 | 20.08 | 18.98 | 1.44 |
| 405.2560 | 22.7   | 9.45  | 9.84  | 16.80 | 12.06 | 0.77 |
| 405.2977 | 23.7   | 18.47 | 16.15 | 17.48 | 17.07 | 0.80 |
| 405.5641 | 304.57 | 15.29 | 16.88 | 15.81 | 15.20 | 0.68 |
| 405.6352 | 79.04  | 20.71 | 19.57 | 17.85 | 19.01 | 0.82 |
| 405.7387 | 26.69  | 17.73 | 19.37 | 18.86 | 19.23 | 1.21 |
| 405.7522 | 25.59  | 16.56 | 17.38 | 16.58 | 16.58 | 0.22 |
| 405.7694 | 26     | 15.38 | 16.44 | 14.87 | 16.15 | 0.19 |
| 405.8121 | 48.47  | 15.69 | 17.72 | 17.83 | 17.53 | 1.74 |
| 405.8578 | 46.3   | 17.00 | 13.50 | 13.81 | 13.91 | 1.28 |
| 405.8955 | 53.38  | 18.91 | 17.91 | 18.42 | 16.75 | 0.58 |
| 405.9728 | 60.03  | 16.18 | 14.64 | 17.40 | 16.77 | 0.09 |
| 405.9851 | 62.72  | 17.71 | 17.27 | 17.76 | 16.81 | 0.23 |
| 406.0150 | 71.47  | 13.87 | 18.12 | 17.85 | 17.48 | 1.54 |
| 406.0956 | 79.98  | 16.12 | 16.52 | 15.51 | 16.79 | 0.03 |
| 406.1342 | 75.52  | 19.66 | 17.75 | 16.40 | 17.48 | 1.24 |
| 406.1457 | 97.47  | 16.04 | 17.21 | 17.35 | 17.51 | 0.90 |
| 406.1821 | 64.58  | 16.25 | 16.11 | 15.69 | 15.28 | 0.32 |
| 406.2429 | 27.42  | 17.16 | 18.56 | 18.35 | 18.71 | 1.31 |
| 406.6793 | 48.79  | 19.21 | 19.78 | 19.77 | 19.11 | 0.38 |
| 406.7481 | 28.65  | 20.46 | 20.59 | 19.27 | 20.67 | 0.38 |
| 406.7653 | 40.61  | 18.97 | 21.21 | 20.98 | 20.81 | 1.67 |
| 406.8558 | 30.98  | 17.56 | 13.65 | 13.65 | 14.58 | 1.39 |
| 406.8889 | 50.74  | 20.65 | 20.89 | 21.43 | 20.57 | 0.34 |
| 406.9218 | 144.24 | 11.67 | 12.69 | 16.55 | 13.47 | 0.72 |
| 406.9986 | 55.58  | 16.74 | 15.78 | 15.56 | 15.96 | 0.51 |
| 407.0122 | 73.89  | 15.31 | 17.72 | 18.03 | 16.97 | 1.59 |
| 407.0914 | 79.9   | 14.73 | 17.34 | 15.40 | 16.53 | 0.66 |
| 407.2361 | 28.6   | 17.81 | 19.34 | 18.38 | 16.09 | 0.32 |
| 407.2501 | 28.98  | 19.45 | 19.59 | 18.61 | 19.73 | 0.24 |
| 407.2605 | 26.12  | 15.83 | 17.70 | 16.45 | 17.78 | 0.90 |
| 407.3152 | 23.81  | 17.70 | 13.17 | 14.82 | 15.28 | 1.26 |
| 407.5499 | 203.04 | 10.59 | 13.72 | 14.52 | 13.76 | 1.06 |
| 407.7555 | 32.88  | 19.64 | 19.77 | 18.36 | 19.77 | 0.45 |
| 407.7669 | 27.02  | 17.11 | 21.16 | 20.03 | 20.75 | 1.60 |
| 407.8553 | 46.28  | 17.06 | 14.59 | 15.17 | 14.77 | 1.19 |
| 407.8924 | 52.11  | 17.04 | 16.25 | 16.42 | 15.21 | 0.53 |
| 407.9442 | 53.5   | 14.68 | 15.72 | 15.81 | 15.12 | 0.68 |
| 407.9956 | 41.37  | 14.19 | 13.85 | 12.15 | 14.80 | 0.34 |
| 408.0089 | 138.02 | 11.98 | 17.27 | 11.17 | 15.34 | 0.54 |
| 408.0292 | 244.42 | 12.40 | 13.96 | 9.83  | 12.10 | 0.08 |
| 408.0602 | 94.25  | 15.47 | 17.70 | 16.78 | 16.54 | 1.55 |
| 408.2575 | 26.02  | 18.20 | 18.46 | 17.35 | 18.59 | 0.15 |
| 408.2687 | 27.1   | 16.23 | 19.96 | 18.87 | 19.72 | 1.54 |
| 408.2928 | 22.84  | 17.36 | 15.77 | 16.45 | 16.94 | 0.86 |
| 408.6264 | 51.59  | 19.16 | 17.31 | 16.00 | 17.33 | 1.16 |
| 408.6771 | 49.11  | 17.91 | 18.39 | 18.39 | 17.92 | 0.35 |
| 408.7452 | 26.08  | 14.90 | 19.32 | 17.38 | 18.45 | 1.57 |
| 408.7683 | 40.39  | 19.26 | 21.81 | 21.23 | 21.58 | 1.58 |
| 408.8542 | 37.01  | 18.14 | 14.98 | 15.25 | 15.58 | 1.33 |
| 408.8860 | 50.63  | 19.72 | 19.91 | 20.41 | 19.48 | 0.26 |
| 408.9241 | 53.83  | 16.87 | 15.36 | 17.41 | 15.73 | 0.36 |
| 408.9545 | 40.99  | 15.74 | 17.94 | 17.60 | 17.46 | 1.73 |
| 409.0225 | 72.01  | 10.02 | 14.94 | 12.01 | 12.54 | 0.82 |
| 409.0545 | 265.63 | 14.13 | 15.84 | 16.69 | 14.94 | 1.13 |
| 409.0846 | 236.3  | 16.10 | 20.98 | 21.41 | 19.65 | 1.43 |

|          |        |       |       |       |       |      |
|----------|--------|-------|-------|-------|-------|------|
| 409.1841 | 30.56  | 17.85 | 19.18 | 18.32 | 19.97 | 0.76 |
| 409.1996 | 29.35  | 18.43 | 18.44 | 19.10 | 19.79 | 0.35 |
| 409.2471 | 32.67  | 12.76 | 18.16 | 16.89 | 16.73 | 1.58 |
| 409.2715 | 116.81 | 14.96 | 15.83 | 12.55 | 15.34 | 0.14 |
| 409.2730 | 45.09  | 21.21 | 20.86 | 21.00 | 20.92 | 0.61 |
| 409.7234 | 49.44  | 17.43 | 15.12 | 14.68 | 13.12 | 0.85 |
| 409.7540 | 34.25  | 19.04 | 22.78 | 21.14 | 22.08 | 1.82 |
| 409.7807 | 30.62  | 15.02 | 18.63 | 17.91 | 18.55 | 1.67 |
| 409.9208 | 43.42  | 15.86 | 17.88 | 17.86 | 18.08 | 1.59 |
| 410.0058 | 85.96  | 17.96 | 12.83 | 13.34 | 15.50 | 1.42 |
| 410.0446 | 79.69  | 16.29 | 16.36 | 15.86 | 16.63 | 0.04 |
| 410.0687 | 207.34 | 15.30 | 15.56 | 16.54 | 17.58 | 0.44 |
| 410.0879 | 230.6  | 15.61 | 17.40 | 17.97 | 16.98 | 1.29 |
| 410.2014 | 32.95  | 15.66 | 14.51 | 15.50 | 17.09 | 0.14 |
| 410.2559 | 24.27  | 17.40 | 21.63 | 20.00 | 20.83 | 1.77 |
| 410.2749 | 45.61  | 18.97 | 17.74 | 17.98 | 17.98 | 1.62 |
| 410.2885 | 24.52  | 16.64 | 17.90 | 17.03 | 18.09 | 0.69 |
| 410.6233 | 44.99  | 20.00 | 17.45 | 17.57 | 17.29 | 1.16 |
| 410.6771 | 48.27  | 16.09 | 15.27 | 15.15 | 15.34 | 0.62 |
| 410.7333 | 25.45  | 16.15 | 10.72 | 13.73 | 10.75 | 1.21 |
| 410.7502 | 25.15  | 17.00 | 11.80 | 12.32 | 12.88 | 1.98 |
| 410.7629 | 33.11  | 20.62 | 24.95 | 23.36 | 24.28 | 1.84 |
| 410.8508 | 46.38  | 18.29 | 19.33 | 19.50 | 19.66 | 1.10 |
| 410.8832 | 50.64  | 17.26 | 16.77 | 17.03 | 15.92 | 0.32 |
| 410.9229 | 29.94  | 14.16 | 15.52 | 16.03 | 15.60 | 0.98 |
| 410.9446 | 48.44  | 15.11 | 15.53 | 14.37 | 15.27 | 0.03 |
| 410.9565 | 76.8   | 14.31 | 14.72 | 15.67 | 15.19 | 0.40 |
| 411.0204 | 301.39 | 14.64 | 18.26 | 17.69 | 15.70 | 1.50 |
| 411.0574 | 36.89  | 8.37  | 10.37 | 13.84 | 11.50 | 1.01 |
| 411.0722 | 204.91 | 16.09 | 17.52 | 17.98 | 18.12 | 0.99 |
| 411.0803 | 227.61 | 14.78 | 16.35 | 16.60 | 15.96 | 1.19 |
| 411.1213 | 60.37  | 15.95 | 13.15 | 15.12 | 14.58 | 0.74 |
| 411.2189 | 22.76  | 16.26 | 9.16  | 9.71  | 10.33 | 1.97 |
| 411.2503 | 44.12  | 19.89 | 16.76 | 17.06 | 16.76 | 1.80 |
| 411.2635 | 29.22  | 19.76 | 23.91 | 22.20 | 23.06 | 1.77 |
| 411.5217 | 304    | 14.26 | 15.40 | 14.86 | 13.14 | 0.36 |
| 411.7330 | 29.22  | 12.67 | 13.53 | 16.40 | 13.99 | 0.48 |
| 411.7515 | 39.27  | 17.59 | 16.33 | 14.33 | 15.88 | 0.75 |
| 411.7680 | 25.87  | 17.94 | 22.37 | 20.77 | 21.75 | 1.83 |
| 411.7780 | 26.47  | 14.98 | 11.53 | 16.28 | 13.27 | 0.56 |
| 411.8409 | 50.72  | 16.91 | 15.41 | 15.58 | 14.28 | 0.70 |
| 411.8526 | 60.93  | 16.41 | 18.13 | 18.52 | 18.41 | 1.46 |
| 411.9215 | 33.31  | 14.15 | 15.23 | 15.44 | 16.06 | 0.89 |
| 412.0241 | 47.49  | 14.60 | 14.95 | 15.91 | 15.75 | 0.53 |
| 412.0503 | 184.85 | 14.98 | 14.34 | 14.61 | 13.89 | 0.37 |
| 412.1130 | 287.13 | 16.36 | 18.80 | 19.20 | 17.51 | 1.44 |
| 412.1385 | 103.75 | 16.52 | 17.47 | 18.70 | 19.94 | 1.10 |
| 412.2533 | 36.01  | 17.21 | 16.96 | 14.36 | 15.63 | 0.61 |
| 412.2716 | 26.46  | 17.36 | 21.35 | 19.79 | 20.74 | 1.77 |
| 412.3052 | 24.55  | 18.49 | 19.69 | 19.28 | 18.32 | 0.47 |
| 412.3209 | 23.38  | 20.43 | 19.28 | 16.77 | 21.75 | 0.56 |
| 412.3418 | 23.11  | 16.60 | 16.18 | 16.83 | 13.71 | 0.16 |
| 412.4281 | 308.24 | 12.96 | 13.95 | 13.84 | 13.30 | 0.62 |
| 412.5587 | 303.12 | 15.24 | 18.85 | 18.09 | 16.56 | 1.23 |
| 412.6200 | 44.91  | 19.95 | 17.71 | 17.19 | 17.33 | 1.30 |
| 412.7095 | 44.81  | 17.48 | 18.95 | 18.91 | 18.41 | 1.39 |

|          |        |       |       |       |       |      |
|----------|--------|-------|-------|-------|-------|------|
| 412.7175 | 47.75  | 17.69 | 19.33 | 19.32 | 18.82 | 1.06 |
| 412.7613 | 39.54  | 16.15 | 19.54 | 18.05 | 18.80 | 1.34 |
| 412.7776 | 28.34  | 18.18 | 21.83 | 20.56 | 21.50 | 1.86 |
| 412.8443 | 45.22  | 15.04 | 14.68 | 14.64 | 14.60 | 0.29 |
| 412.8588 | 28.52  | 18.67 | 19.35 | 19.76 | 19.50 | 0.76 |
| 412.8979 | 45.31  | 14.39 | 15.75 | 15.38 | 15.97 | 0.65 |
| 412.9436 | 49.43  | 14.32 | 15.12 | 14.91 | 15.29 | 0.51 |
| 412.9876 | 47.6   | 14.31 | 14.58 | 15.26 | 15.64 | 0.24 |
| 413.0294 | 259.65 | 17.05 | 17.63 | 17.46 | 16.11 | 0.17 |
| 413.0604 | 305.18 | 15.50 | 16.66 | 15.26 | 14.35 | 0.19 |
| 413.0711 | 49.31  | 16.50 | 15.22 | 16.37 | 16.16 | 0.40 |
| 413.1170 | 78.56  | 13.17 | 14.76 | 13.59 | 14.45 | 0.35 |
| 413.1408 | 82.01  | 13.83 | 11.07 | 12.45 | 16.44 | 0.52 |
| 413.2652 | 46.78  | 20.38 | 19.57 | 19.04 | 18.72 | 1.05 |
| 413.2791 | 28.75  | 17.36 | 20.75 | 19.47 | 20.45 | 1.81 |
| 413.3089 | 22.96  | 16.13 | 17.06 | 16.54 | 15.34 | 0.22 |
| 413.3242 | 23.49  | 18.53 | 16.43 | 13.28 | 19.77 | 0.72 |
| 413.7383 | 25.3   | 15.37 | 18.34 | 16.44 | 17.65 | 1.18 |
| 413.7490 | 30.91  | 15.43 | 18.43 | 18.30 | 17.80 | 1.49 |
| 413.7655 | 25.28  | 15.29 | 13.30 | 15.79 | 14.61 | 0.38 |
| 413.7829 | 25.03  | 15.75 | 17.82 | 16.42 | 17.95 | 0.91 |
| 413.8384 | 50.66  | 15.66 | 13.73 | 14.10 | 12.99 | 0.74 |
| 413.8480 | 51.36  | 15.85 | 18.08 | 18.20 | 17.76 | 1.79 |
| 413.8741 | 101.59 | 14.47 | 12.28 | 14.34 | 13.79 | 0.33 |
| 413.8875 | 67.68  | 14.94 | 15.75 | 15.81 | 14.82 | 0.50 |
| 413.9982 | 70.98  | 20.07 | 21.10 | 21.99 | 21.66 | 1.03 |
| 414.0071 | 54.17  | 21.47 | 21.07 | 21.38 | 20.92 | 0.26 |
| 414.0266 | 74.91  | 15.91 | 15.90 | 15.37 | 14.41 | 0.16 |
| 414.0380 | 102.97 | 15.46 | 16.09 | 14.06 | 15.46 | 0.14 |
| 414.0651 | 257.21 | 13.92 | 16.22 | 14.50 | 14.47 | 0.60 |
| 414.1602 | 132.28 | 15.99 | 17.52 | 17.32 | 17.05 | 1.11 |
| 414.2152 | 35.05  | 17.66 | 20.06 | 20.19 | 18.97 | 1.38 |
| 414.2399 | 24.89  | 15.47 | 16.99 | 15.34 | 16.79 | 0.54 |
| 414.2534 | 58.13  | 14.67 | 16.94 | 17.41 | 16.20 | 1.22 |
| 414.2692 | 45.59  | 18.51 | 16.60 | 16.41 | 16.29 | 1.18 |
| 414.3212 | 23.93  | 20.37 | 21.88 | 20.82 | 20.45 | 0.68 |
| 414.3576 | 23.04  | 19.41 | 18.81 | 18.87 | 18.75 | 0.49 |
| 414.5885 | 59.42  | 15.18 | 16.15 | 16.29 | 15.57 | 0.78 |
| 414.6183 | 49.25  | 18.84 | 16.16 | 15.89 | 15.91 | 1.23 |
| 414.7074 | 45     | 17.77 | 19.18 | 19.28 | 18.85 | 1.39 |
| 414.7147 | 47.78  | 18.47 | 20.14 | 20.19 | 19.76 | 1.09 |
| 414.7347 | 40.72  | 16.82 | 11.50 | 12.05 | 12.54 | 1.98 |
| 414.7455 | 30.82  | 17.06 | 19.95 | 18.51 | 19.98 | 1.49 |
| 414.7592 | 125.91 | 14.09 | 12.22 | 12.97 | 12.85 | 0.33 |
| 414.7617 | 27.13  | 15.83 | 20.59 | 19.02 | 19.90 | 1.64 |
| 414.7730 | 38.16  | 16.32 | 18.86 | 19.83 | 18.90 | 1.57 |
| 414.8489 | 49.22  | 14.97 | 15.71 | 16.65 | 16.54 | 0.93 |
| 414.8844 | 91.84  | 14.70 | 20.43 | 20.26 | 18.96 | 1.51 |
| 414.9716 | 97.35  | 16.65 | 18.74 | 18.85 | 18.11 | 1.09 |
| 414.9886 | 59.06  | 15.45 | 16.18 | 17.28 | 16.22 | 0.73 |
| 415.0020 | 58.79  | 15.83 | 15.92 | 16.97 | 16.66 | 0.31 |
| 415.0107 | 54.41  | 16.66 | 15.64 | 16.03 | 15.56 | 0.48 |
| 415.0477 | 170.31 | 12.93 | 14.23 | 14.69 | 16.60 | 0.46 |
| 415.0486 | 58.84  | 16.97 | 15.79 | 17.75 | 15.46 | 0.25 |
| 415.1004 | 48.99  | 15.91 | 14.40 | 14.37 | 15.30 | 0.64 |
| 415.1561 | 63.96  | 14.74 | 16.27 | 16.51 | 16.30 | 0.80 |

|          |        |       |       |       |       |      |
|----------|--------|-------|-------|-------|-------|------|
| 415.2171 | 34.93  | 15.72 | 17.19 | 17.48 | 15.94 | 0.69 |
| 415.2358 | 20.67  | 16.32 | 10.54 | 10.78 | 11.97 | 1.74 |
| 415.2479 | 25.42  | 15.88 | 18.57 | 16.87 | 18.40 | 1.11 |
| 415.2622 | 26.88  | 17.54 | 19.31 | 17.68 | 19.12 | 0.77 |
| 415.2739 | 31.82  | 15.20 | 17.88 | 19.03 | 17.77 | 1.50 |
| 415.3245 | 23.33  | 18.09 | 19.59 | 18.39 | 18.14 | 0.58 |
| 415.3609 | 22.99  | 17.36 | 15.86 | 16.22 | 16.32 | 0.89 |
| 415.7540 | 24.78  | 16.75 | 19.46 | 18.10 | 19.38 | 1.59 |
| 415.7697 | 33.13  | 17.82 | 20.94 | 19.80 | 20.35 | 1.66 |
| 415.7808 | 34.43  | 14.45 | 15.59 | 17.95 | 14.96 | 0.70 |
| 415.8425 | 50.08  | 13.36 | 16.10 | 15.90 | 15.29 | 1.45 |
| 415.8884 | 46.1   | 17.34 | 17.56 | 17.66 | 17.74 | 0.25 |
| 415.9937 | 59.23  | 16.83 | 17.71 | 18.84 | 18.41 | 0.86 |
| 416.0033 | 55.33  | 18.98 | 18.52 | 18.88 | 18.51 | 0.28 |
| 416.0250 | 87.23  | 15.54 | 18.48 | 18.90 | 17.32 | 1.28 |
| 416.0510 | 166.67 | 16.39 | 17.42 | 17.25 | 18.15 | 0.46 |
| 416.2555 | 26.22  | 15.34 | 17.97 | 16.18 | 18.29 | 0.88 |
| 416.2723 | 30.07  | 16.33 | 19.82 | 18.74 | 19.15 | 1.72 |
| 416.2821 | 23.06  | 15.51 | 13.36 | 16.92 | 14.18 | 0.32 |
| 416.3368 | 23.42  | 21.35 | 22.76 | 21.51 | 21.13 | 0.49 |
| 416.6155 | 45.16  | 17.02 | 12.30 | 12.01 | 12.37 | 1.41 |
| 416.7076 | 46.58  | 18.82 | 20.20 | 20.17 | 19.62 | 1.08 |
| 416.7599 | 32.35  | 13.07 | 18.10 | 15.16 | 16.51 | 1.11 |
| 416.7786 | 33.9   | 16.80 | 20.29 | 18.61 | 19.26 | 1.60 |
| 416.7918 | 42.29  | 16.81 | 17.58 | 18.71 | 17.68 | 0.96 |
| 416.8012 | 48.26  | 16.93 | 20.25 | 20.25 | 20.02 | 1.55 |
| 416.8177 | 43.55  | 14.46 | 14.70 | 13.95 | 15.00 | 0.00 |
| 416.8844 | 43.71  | 17.42 | 18.50 | 18.18 | 18.33 | 0.81 |
| 416.8917 | 48.19  | 16.28 | 17.39 | 17.27 | 17.07 | 0.78 |
| 416.9176 | 48.93  | 20.14 | 19.84 | 20.59 | 18.91 | 0.10 |
| 416.9893 | 55.17  | 17.43 | 15.30 | 14.24 | 15.05 | 1.01 |
| 417.0043 | 58.83  | 15.04 | 13.67 | 13.94 | 15.66 | 0.42 |
| 417.0343 | 259.91 | 13.61 | 16.52 | 17.46 | 15.15 | 1.55 |
| 417.0478 | 60.42  | 15.55 | 11.50 | 15.56 | 14.57 | 0.74 |
| 417.0536 | 170.79 | 15.08 | 17.09 | 16.72 | 16.82 | 0.64 |
| 417.2361 | 28.7   | 16.67 | 20.61 | 20.66 | 20.25 | 1.64 |
| 417.2838 | 25.53  | 15.18 | 19.21 | 18.12 | 17.76 | 1.40 |
| 417.3396 | 23.44  | 19.22 | 20.55 | 19.20 | 18.97 | 0.42 |
| 417.7376 | 27.28  | 17.82 | 19.42 | 19.51 | 19.28 | 1.24 |
| 417.7695 | 26.94  | 14.19 | 17.85 | 13.64 | 16.28 | 0.53 |
| 417.7921 | 47.82  | 17.23 | 19.14 | 19.30 | 18.59 | 1.59 |
| 417.8919 | 47.85  | 16.30 | 16.12 | 16.38 | 16.69 | 0.00 |
| 417.9544 | 50.55  | 15.06 | 15.01 | 16.10 | 15.82 | 0.42 |
| 417.9715 | 80.55  | 17.86 | 18.48 | 18.45 | 18.17 | 0.62 |
| 418.0962 | 86.02  | 15.53 | 16.42 | 16.42 | 16.50 | 0.71 |
| 418.2431 | 32.77  | 17.20 | 19.09 | 19.01 | 18.56 | 1.29 |
| 418.2645 | 31.15  | 16.68 | 8.58  | 9.08  | 9.81  | 1.99 |
| 418.3429 | 23.24  | 15.73 | 16.76 | 15.16 | 15.02 | 0.10 |
| 418.6589 | 48.29  | 19.22 | 19.17 | 19.01 | 18.62 | 0.21 |
| 418.7063 | 46.85  | 16.93 | 18.41 | 18.37 | 17.94 | 1.10 |
| 418.7465 | 30.13  | 20.27 | 17.93 | 17.94 | 18.04 | 1.66 |
| 418.7592 | 25.61  | 16.53 | 19.28 | 18.10 | 18.80 | 1.38 |
| 418.7907 | 45.05  | 16.68 | 18.38 | 19.16 | 18.34 | 1.64 |
| 418.7983 | 48.23  | 17.33 | 20.32 | 20.30 | 20.16 | 1.55 |
| 418.8383 | 45.22  | 15.03 | 15.67 | 16.45 | 16.38 | 0.57 |
| 418.8916 | 45.17  | 16.84 | 18.73 | 18.79 | 18.05 | 1.35 |

|          |        |       |       |       |       |      |
|----------|--------|-------|-------|-------|-------|------|
| 418.9149 | 52.98  | 17.81 | 17.07 | 17.62 | 15.75 | 0.37 |
| 418.9323 | 44.91  | 19.55 | 18.96 | 19.56 | 18.91 | 0.27 |
| 418.9414 | 276.31 | 16.97 | 13.11 | 13.72 | 14.85 | 0.97 |
| 418.9695 | 99.4   | 17.48 | 18.88 | 19.22 | 18.55 | 1.06 |
| 419.0415 | 48.33  | 16.67 | 16.64 | 15.10 | 14.50 | 0.41 |
| 419.0872 | 68.98  | 17.10 | 15.91 | 16.50 | 16.21 | 0.57 |
| 419.2154 | 76.29  | 14.62 | 16.02 | 14.20 | 16.08 | 0.33 |
| 419.2499 | 26.27  | 19.29 | 17.47 | 17.29 | 17.53 | 1.44 |
| 419.2609 | 26.49  | 13.81 | 18.19 | 17.54 | 17.72 | 1.58 |
| 419.3155 | 157.79 | 20.96 | 19.62 | 19.63 | 19.43 | 0.75 |
| 419.7556 | 25.07  | 17.31 | 11.42 | 11.59 | 12.25 | 1.87 |
| 419.7627 | 26.61  | 17.90 | 20.85 | 19.77 | 20.61 | 1.43 |
| 419.7911 | 49.65  | 16.43 | 19.58 | 19.79 | 18.91 | 1.68 |
| 419.9492 | 40.12  | 15.63 | 15.50 | 15.53 | 17.20 | 0.05 |
| 420.0153 | 53.22  | 22.97 | 24.81 | 24.57 | 23.91 | 1.31 |
| 420.1630 | 130.35 | 15.37 | 14.10 | 14.93 | 14.80 | 0.67 |
| 420.1978 | 58.38  | 16.39 | 16.18 | 15.92 | 15.90 | 0.29 |
| 420.2573 | 24.98  | 17.24 | 14.04 | 12.05 | 13.71 | 1.34 |
| 420.2687 | 26.96  | 16.68 | 19.74 | 18.61 | 19.56 | 1.46 |
| 420.3106 | 22.83  | 15.36 | 13.89 | 14.14 | 14.10 | 0.73 |
| 420.3188 | 286.53 | 19.64 | 18.89 | 18.80 | 18.77 | 0.55 |
| 420.5432 | 305.41 | 14.47 | 14.40 | 11.89 | 14.07 | 0.46 |
| 420.6517 | 45.13  | 18.51 | 17.61 | 17.28 | 17.27 | 0.67 |
| 420.6598 | 49.82  | 19.38 | 19.90 | 19.88 | 19.25 | 0.38 |
| 420.7634 | 24.83  | 17.62 | 10.99 | 10.89 | 11.68 | 1.92 |
| 420.7748 | 29.97  | 14.06 | 18.52 | 17.24 | 18.20 | 1.44 |
| 420.7915 | 45.66  | 17.00 | 19.29 | 19.62 | 19.03 | 1.63 |
| 420.8885 | 47.02  | 17.86 | 18.61 | 18.69 | 19.69 | 0.66 |
| 420.9299 | 60.76  | 19.13 | 19.23 | 19.54 | 19.26 | 0.22 |
| 420.9632 | 84.21  | 14.91 | 16.53 | 16.04 | 15.53 | 0.67 |
| 420.9757 | 56.51  | 11.11 | 14.72 | 13.08 | 14.59 | 0.90 |
| 420.9913 | 96.23  | 16.26 | 20.18 | 19.52 | 18.62 | 1.48 |
| 421.0192 | 53.11  | 18.98 | 20.63 | 20.47 | 19.73 | 1.31 |
| 421.0372 | 72.21  | 15.30 | 14.04 | 15.65 | 15.03 | 0.29 |
| 421.0562 | 59.99  | 16.76 | 16.33 | 15.94 | 15.00 | 0.32 |
| 421.0719 | 83.22  | 19.16 | 20.46 | 20.74 | 19.77 | 0.71 |
| 421.0846 | 230.83 | 16.34 | 19.98 | 20.53 | 19.19 | 1.56 |
| 421.0988 | 89.82  | 16.36 | 17.46 | 18.66 | 16.93 | 0.93 |
| 421.1112 | 85.91  | 16.76 | 18.21 | 17.38 | 17.57 | 0.91 |
| 421.2768 | 26.75  | 15.28 | 17.57 | 15.72 | 17.65 | 0.98 |
| 421.3177 | 23.59  | 15.55 | 17.06 | 17.42 | 16.77 | 0.81 |
| 421.3220 | 194.01 | 15.47 | 7.83  | 8.67  | 9.79  | 1.57 |
| 421.7216 | 63.78  | 16.96 | 15.82 | 16.96 | 16.28 | 0.33 |
| 421.7536 | 25.47  | 16.78 | 20.59 | 19.00 | 19.70 | 1.48 |
| 421.7858 | 39.47  | 15.15 | 20.56 | 20.02 | 20.38 | 1.91 |
| 421.8699 | 52.07  | 17.49 | 13.67 | 14.80 | 13.38 | 1.09 |
| 421.8778 | 50.44  | 15.06 | 18.36 | 18.53 | 17.85 | 1.68 |
| 421.9315 | 67.76  | 15.85 | 14.72 | 15.20 | 15.76 | 0.36 |
| 421.9479 | 50.9   | 15.38 | 14.46 | 17.29 | 15.89 | 0.16 |
| 422.0011 | 42.84  | 13.56 | 16.87 | 14.85 | 15.22 | 0.89 |
| 422.0109 | 53.36  | 20.03 | 21.79 | 21.63 | 20.81 | 1.27 |
| 422.0202 | 60.64  | 17.83 | 18.92 | 19.63 | 18.60 | 1.08 |
| 422.0765 | 76.36  | 16.57 | 16.16 | 16.06 | 16.03 | 0.30 |
| 422.0875 | 227.93 | 10.93 | 14.92 | 15.63 | 14.91 | 1.52 |
| 422.1045 | 65.14  | 17.72 | 17.19 | 16.74 | 16.75 | 0.53 |
| 422.1055 | 275.46 | 12.07 | 16.73 | 15.99 | 14.89 | 1.30 |

|          |        |       |       |       |       |      |
|----------|--------|-------|-------|-------|-------|------|
| 422.2234 | 61.46  | 15.80 | 13.75 | 15.35 | 14.80 | 0.64 |
| 422.2556 | 26.14  | 15.66 | 19.38 | 17.82 | 18.64 | 1.42 |
| 422.2844 | 26.93  | 15.88 | 18.59 | 17.60 | 18.64 | 1.48 |
| 422.3263 | 23.17  | 18.44 | 18.87 | 18.72 | 18.50 | 0.25 |
| 422.6542 | 48.51  | 19.90 | 20.05 | 19.90 | 19.45 | 0.01 |
| 422.7423 | 46.48  | 18.79 | 20.70 | 20.76 | 20.22 | 1.35 |
| 422.7618 | 28.25  | 19.85 | 24.34 | 22.82 | 23.90 | 1.83 |
| 422.7912 | 37.3   | 15.00 | 18.81 | 18.39 | 18.84 | 1.46 |
| 422.8628 | 50.71  | 20.11 | 18.52 | 18.96 | 18.01 | 0.91 |
| 422.8833 | 35.5   | 16.00 | 17.82 | 17.94 | 18.12 | 1.16 |
| 422.9274 | 61.42  | 16.79 | 16.02 | 16.44 | 16.96 | 0.42 |
| 423.0143 | 52.93  | 16.25 | 16.91 | 16.53 | 16.18 | 0.35 |
| 423.0804 | 225.57 | 11.16 | 12.91 | 13.53 | 13.51 | 0.75 |
| 423.2232 | 56.01  | 16.44 | 16.13 | 16.72 | 15.90 | 0.06 |
| 423.2634 | 29.27  | 19.16 | 23.37 | 21.85 | 22.83 | 1.79 |
| 423.3292 | 23.25  | 16.53 | 16.28 | 16.13 | 15.96 | 0.19 |
| 423.7322 | 43.42  | 17.20 | 17.05 | 18.04 | 18.30 | 0.23 |
| 423.7698 | 29.19  | 18.79 | 23.22 | 21.37 | 22.16 | 1.80 |
| 423.7854 | 49.28  | 15.27 | 14.04 | 16.14 | 15.36 | 0.14 |
| 423.8719 | 37.74  | 16.98 | 18.02 | 18.29 | 17.85 | 1.17 |
| 423.9182 | 52.22  | 13.87 | 14.98 | 15.27 | 14.20 | 0.58 |
| 423.9833 | 122.46 | 15.12 | 15.98 | 10.66 | 14.33 | 0.38 |
| 424.0068 | 55.24  | 15.71 | 16.30 | 16.11 | 15.51 | 0.32 |
| 424.0648 | 95.86  | 15.75 | 18.80 | 18.40 | 17.56 | 1.53 |
| 424.1022 | 79.27  | 11.98 | 15.54 | 15.45 | 14.54 | 1.30 |
| 424.2708 | 29.68  | 18.02 | 22.17 | 20.43 | 21.18 | 1.73 |
| 424.3420 | 23.66  | 22.27 | 22.70 | 22.67 | 22.27 | 0.25 |
| 424.5401 | 256.61 | 15.27 | 16.50 | 15.98 | 14.63 | 0.57 |
| 424.6514 | 48.69  | 18.74 | 18.73 | 18.68 | 18.28 | 0.09 |
| 424.7383 | 49.2   | 19.23 | 21.15 | 21.17 | 20.68 | 1.57 |
| 424.7584 | 27.07  | 16.06 | 17.97 | 16.25 | 18.02 | 0.62 |
| 424.7777 | 30.32  | 18.84 | 22.77 | 21.16 | 22.13 | 1.82 |
| 424.8308 | 47.89  | 14.99 | 12.06 | 15.22 | 13.50 | 0.58 |
| 424.8596 | 50.72  | 19.48 | 17.79 | 17.80 | 16.17 | 0.79 |
| 424.8964 | 34.52  | 16.17 | 12.39 | 16.82 | 14.99 | 0.60 |
| 424.9192 | 30.34  | 13.90 | 12.26 | 15.66 | 13.49 | 0.06 |
| 424.9286 | 37.04  | 15.63 | 20.56 | 20.15 | 19.60 | 1.99 |
| 425.0034 | 102.64 | 14.45 | 13.44 | 13.57 | 12.99 | 0.67 |
| 425.0441 | 296.27 | 14.42 | 19.28 | 19.44 | 17.25 | 1.86 |
| 425.1361 | 40.87  | 14.38 | 13.29 | 14.81 | 14.30 | 0.15 |
| 425.2579 | 25.08  | 14.85 | 16.13 | 14.62 | 16.41 | 0.36 |
| 425.2792 | 29.82  | 18.12 | 21.76 | 20.18 | 21.05 | 1.75 |
| 425.3453 | 22.98  | 20.42 | 20.66 | 20.69 | 20.37 | 0.16 |
| 425.7288 | 46.86  | 17.47 | 12.55 | 12.91 | 13.50 | 1.71 |
| 425.7488 | 264.45 | 18.41 | 15.52 | 14.13 | 16.33 | 1.39 |
| 425.7490 | 28.93  | 16.16 | 19.81 | 20.11 | 19.53 | 1.90 |
| 425.7491 | 120.96 | 18.38 | 16.99 | 17.06 | 17.32 | 0.61 |
| 425.7664 | 25.74  | 15.63 | 16.34 | 14.21 | 15.51 | 0.12 |
| 425.7822 | 25.39  | 15.87 | 19.09 | 17.16 | 18.27 | 1.30 |
| 425.8768 | 116.82 | 12.79 | 13.75 | 9.22  | 14.16 | 0.22 |
| 425.9231 | 48.27  | 13.52 | 14.66 | 14.10 | 14.88 | 0.42 |
| 425.9323 | 37.51  | 13.77 | 16.97 | 16.33 | 15.67 | 1.61 |
| 425.9553 | 40.81  | 14.03 | 14.81 | 16.89 | 14.72 | 0.78 |
| 426.0224 | 91.28  | 17.00 | 9.72  | 11.45 | 10.42 | 1.31 |
| 426.0320 | 85.97  | 14.07 | 20.24 | 20.20 | 18.62 | 1.88 |
| 426.0700 | 55.18  | 16.98 | 18.22 | 17.87 | 17.97 | 1.10 |

|          |        |       |       |       |       |      |
|----------|--------|-------|-------|-------|-------|------|
| 426.1113 | 217.17 | 10.37 | 14.02 | 13.53 | 13.64 | 1.07 |
| 426.2501 | 29.16  | 13.98 | 18.72 | 19.03 | 18.16 | 1.67 |
| 426.2507 | 122.43 | 16.68 | 15.35 | 15.85 | 15.97 | 0.40 |
| 426.3576 | 24.93  | 23.57 | 23.84 | 23.64 | 23.25 | 0.07 |
| 426.6507 | 47.26  | 16.53 | 16.55 | 16.28 | 15.78 | 0.14 |
| 426.7367 | 45.96  | 17.50 | 20.40 | 20.13 | 19.84 | 1.20 |
| 426.7563 | 44.35  | 14.30 | 18.24 | 17.62 | 17.00 | 1.28 |
| 426.7880 | 46.96  | 14.82 | 14.50 | 15.53 | 14.19 | 0.01 |
| 426.8259 | 46.5   | 17.84 | 20.06 | 20.21 | 20.14 | 1.57 |
| 426.8574 | 50.23  | 17.02 | 12.02 | 12.75 | 12.42 | 1.35 |
| 426.8995 | 20.26  | 15.43 | 17.41 | 16.74 | 16.87 | 1.58 |
| 426.9126 | 46.31  | 15.43 | 15.48 | 13.02 | 13.88 | 0.38 |
| 426.9234 | 43.14  | 14.58 | 18.35 | 17.97 | 17.43 | 1.64 |
| 426.9352 | 134.02 | 11.15 | 12.35 | 15.09 | 14.42 | 0.87 |
| 426.9456 | 38.85  | 13.74 | 14.64 | 14.31 | 15.10 | 0.53 |
| 426.9621 | 273.69 | 10.37 | 16.20 | 16.77 | 13.82 | 1.55 |
| 426.9712 | 264.31 | 17.73 | 19.59 | 19.92 | 18.77 | 1.39 |
| 426.9836 | 85.67  | 15.07 | 18.35 | 18.18 | 17.03 | 1.51 |
| 427.0327 | 85.44  | 15.07 | 16.89 | 16.31 | 15.73 | 0.93 |
| 427.0441 | 143.65 | 15.32 | 17.51 | 15.44 | 15.53 | 0.37 |
| 427.0767 | 71.66  | 16.55 | 11.66 | 11.62 | 12.60 | 1.55 |
| 427.0948 | 197.15 | 21.35 | 22.97 | 23.23 | 23.90 | 0.87 |
| 427.1375 | 68.9   | 14.58 | 17.82 | 16.34 | 17.39 | 1.32 |
| 427.2583 | 27.78  | 11.94 | 15.20 | 15.22 | 14.52 | 0.74 |
| 427.3609 | 22.97  | 21.66 | 21.86 | 21.74 | 21.34 | 0.06 |
| 427.3780 | 287.4  | 17.37 | 15.99 | 16.73 | 16.06 | 0.62 |
| 427.3782 | 166.57 | 17.60 | 15.11 | 15.89 | 15.72 | 1.16 |
| 427.7640 | 26.95  | 13.76 | 18.45 | 17.25 | 18.15 | 1.32 |
| 427.8262 | 50.03  | 15.00 | 18.68 | 18.89 | 18.23 | 1.86 |
| 427.9841 | 83.14  | 15.06 | 15.56 | 15.46 | 14.85 | 0.21 |
| 427.9979 | 46.51  | 14.98 | 15.41 | 15.57 | 15.83 | 0.33 |
| 428.0121 | 56.32  | 17.95 | 17.30 | 15.89 | 16.25 | 0.65 |
| 428.0278 | 274.56 | 16.75 | 19.13 | 19.76 | 18.77 | 0.97 |
| 428.0362 | 299.65 | 12.99 | 19.83 | 19.66 | 16.77 | 1.84 |
| 428.0370 | 85.16  | 13.57 | 16.43 | 17.05 | 15.35 | 1.22 |
| 428.0986 | 191.37 | 22.03 | 24.25 | 24.60 | 24.33 | 1.24 |
| 428.1763 | 120.52 | 17.53 | 18.62 | 18.67 | 18.19 | 1.26 |
| 428.2670 | 28.03  | 11.93 | 16.25 | 13.63 | 16.96 | 0.87 |
| 428.2867 | 45.45  | 15.05 | 16.29 | 16.13 | 15.83 | 0.75 |
| 428.3636 | 23.33  | 18.33 | 18.35 | 17.95 | 18.00 | 0.11 |
| 428.3732 | 22.89  | 22.55 | 22.14 | 22.14 | 21.62 | 0.38 |
| 428.6878 | 46.93  | 19.14 | 19.96 | 19.83 | 19.43 | 0.79 |
| 428.7376 | 47.75  | 15.78 | 17.71 | 17.68 | 17.34 | 1.33 |
| 428.7788 | 30.35  | 12.77 | 17.92 | 16.72 | 16.92 | 1.39 |
| 428.7893 | 35.06  | 12.80 | 12.60 | 15.93 | 13.71 | 0.37 |
| 428.7935 | 283.34 | 14.71 | 14.16 | 15.83 | 14.25 | 0.04 |
| 428.8272 | 35.17  | 17.91 | 20.00 | 20.40 | 20.03 | 1.68 |
| 428.8724 | 52.25  | 15.17 | 14.18 | 15.68 | 15.21 | 0.12 |
| 428.9163 | 49.44  | 14.20 | 14.82 | 14.08 | 14.78 | 0.18 |
| 428.9384 | 267.98 | 14.78 | 16.38 | 16.56 | 14.95 | 0.71 |
| 428.9613 | 43.11  | 18.30 | 19.90 | 20.02 | 20.21 | 1.31 |
| 428.9768 | 55.62  | 14.07 | 17.75 | 18.87 | 17.01 | 1.58 |
| 428.9967 | 53.51  | 16.08 | 18.25 | 17.81 | 16.23 | 0.79 |
| 429.0340 | 88.1   | 10.42 | 18.96 | 18.19 | 16.67 | 1.75 |
| 429.0452 | 49.76  | 16.72 | 11.15 | 11.93 | 12.76 | 1.38 |
| 429.0903 | 263.35 | 16.49 | 15.24 | 17.65 | 16.53 | 0.07 |

|          |        |       |       |       |       |      |
|----------|--------|-------|-------|-------|-------|------|
| 429.0950 | 210.32 | 15.27 | 20.90 | 14.10 | 19.28 | 0.49 |
| 429.1794 | 117.16 | 14.78 | 14.72 | 13.69 | 14.47 | 0.36 |
| 429.2256 | 266.32 | 15.64 | 14.74 | 15.85 | 14.50 | 0.26 |
| 429.2391 | 46.59  | 20.64 | 19.94 | 19.81 | 19.48 | 0.88 |
| 429.2808 | 28.84  | 15.44 | 16.48 | 14.65 | 16.32 | 0.19 |
| 429.3752 | 24.14  | 20.69 | 20.07 | 20.12 | 19.63 | 0.56 |
| 429.7858 | 29.8   | 13.88 | 18.02 | 16.36 | 16.79 | 1.30 |
| 429.8122 | 45.28  | 16.42 | 12.52 | 11.85 | 12.56 | 1.25 |
| 429.8201 | 49.97  | 15.09 | 18.78 | 18.98 | 18.08 | 1.77 |
| 429.9680 | 51.73  | 20.63 | 18.56 | 18.74 | 19.91 | 1.32 |
| 430.0040 | 94.83  | 14.77 | 17.07 | 16.55 | 16.54 | 1.01 |
| 430.0310 | 90.77  | 13.53 | 17.26 | 17.61 | 15.39 | 1.40 |
| 430.0430 | 85.17  | 15.79 | 17.53 | 16.93 | 16.60 | 1.07 |
| 430.0942 | 261.81 | 15.04 | 13.22 | 18.45 | 14.49 | 0.07 |
| 430.1031 | 205.84 | 15.89 | 17.61 | 17.32 | 17.71 | 1.05 |
| 430.1956 | 101.23 | 16.75 | 18.27 | 18.45 | 17.46 | 1.26 |
| 430.2435 | 40.69  | 18.34 | 17.66 | 17.98 | 17.85 | 0.41 |
| 430.2884 | 31.29  | 15.03 | 15.94 | 14.56 | 14.89 | 0.11 |
| 430.3158 | 23.17  | 13.73 | 14.00 | 13.37 | 12.90 | 0.08 |
| 430.3523 | 22.86  | 13.37 | 13.49 | 12.39 | 13.10 | 0.15 |
| 430.3795 | 22.66  | 18.50 | 16.82 | 16.99 | 16.77 | 1.11 |
| 430.4041 | 22.42  | 14.95 | 12.76 | 13.84 | 13.78 | 0.88 |
| 430.6837 | 45.81  | 19.75 | 20.73 | 20.60 | 20.14 | 0.88 |
| 430.7470 | 28.98  | 19.68 | 15.68 | 15.73 | 17.13 | 1.41 |
| 430.7590 | 26.2   | 11.46 | 17.47 | 14.34 | 15.78 | 1.07 |
| 430.8209 | 45.53  | 14.67 | 17.69 | 18.34 | 17.75 | 1.81 |
| 430.8620 | 238.07 | 14.34 | 16.37 | 12.42 | 16.09 | 0.14 |
| 430.9137 | 52.28  | 19.17 | 17.81 | 17.19 | 18.11 | 0.96 |
| 430.9626 | 47.25  | 17.04 | 17.90 | 18.67 | 18.41 | 0.87 |
| 431.0006 | 50.38  | 11.90 | 15.28 | 15.76 | 15.06 | 1.56 |
| 431.0256 | 275.21 | 16.36 | 18.53 | 19.01 | 17.99 | 1.25 |
| 431.0725 | 203.64 | 12.89 | 13.74 | 13.70 | 13.83 | 0.40 |
| 431.0975 | 195.24 | 14.60 | 15.75 | 15.71 | 16.87 | 0.66 |
| 431.1193 | 83.5   | 19.09 | 18.14 | 17.70 | 17.80 | 0.74 |
| 431.1410 | 63.65  | 17.49 | 14.54 | 14.23 | 16.49 | 1.05 |
| 431.1869 | 28.36  | 15.22 | 17.06 | 16.03 | 17.04 | 0.90 |
| 431.2262 | 276.18 | 16.74 | 18.53 | 19.05 | 18.18 | 1.19 |
| 431.2491 | 30.91  | 18.67 | 16.25 | 16.37 | 17.09 | 1.09 |
| 431.3869 | 20.46  | 17.48 | 13.09 | 15.18 | 14.71 | 1.32 |
| 431.4267 | 276.94 | 15.78 | 17.82 | 18.28 | 17.83 | 1.14 |
| 431.6273 | 274.81 | 14.11 | 17.18 | 17.12 | 16.54 | 1.23 |
| 431.6276 | 91.86  | 11.26 | 17.15 | 16.61 | 16.59 | 1.87 |
| 431.7553 | 24.56  | 18.23 | 12.43 | 13.08 | 13.79 | 1.91 |
| 431.7670 | 27.02  | 16.40 | 19.72 | 18.63 | 19.46 | 1.44 |
| 431.8149 | 48.3   | 15.98 | 17.23 | 17.32 | 16.43 | 1.13 |
| 431.8278 | 93.05  | 11.41 | 12.85 | 14.38 | 12.91 | 0.60 |
| 431.8679 | 47.17  | 16.06 | 15.35 | 15.58 | 15.78 | 0.42 |
| 431.9090 | 52.56  | 18.39 | 18.72 | 18.66 | 18.54 | 0.36 |
| 431.9970 | 64.09  | 15.63 | 17.52 | 17.92 | 16.92 | 1.19 |
| 432.0262 | 299.91 | 13.54 | 16.48 | 15.15 | 13.41 | 0.80 |
| 432.0268 | 93.91  | 10.76 | 15.07 | 13.73 | 12.20 | 1.09 |
| 432.0516 | 89.53  | 15.75 | 19.25 | 18.78 | 17.61 | 1.52 |
| 432.2220 | 77.63  | 20.05 | 20.33 | 20.52 | 19.11 | 0.11 |
| 432.2578 | 25.22  | 17.37 | 15.44 | 12.61 | 13.20 | 1.22 |
| 432.2686 | 26.76  | 15.40 | 18.36 | 17.41 | 18.48 | 1.56 |
| 432.2799 | 24.97  | 19.94 | 15.96 | 15.70 | 17.21 | 1.66 |



|          |        |       |       |       |       |      |
|----------|--------|-------|-------|-------|-------|------|
| 432.3834 | 22.6   | 11.72 | 9.29  | 12.65 | 11.90 | 0.21 |
| 432.6815 | 45.94  | 19.23 | 20.19 | 20.06 | 19.60 | 0.95 |
| 432.7661 | 41.52  | 18.64 | 18.09 | 18.24 | 18.13 | 0.56 |
| 432.7751 | 40.69  | 18.05 | 20.97 | 20.68 | 20.68 | 1.73 |
| 432.8597 | 28.5   | 16.99 | 18.25 | 18.11 | 17.69 | 1.14 |
| 432.8957 | 45.04  | 19.48 | 21.01 | 21.13 | 20.24 | 1.11 |
| 432.9638 | 54.11  | 17.33 | 14.23 | 14.05 | 13.87 | 1.04 |
| 433.0500 | 255.05 | 11.35 | 13.42 | 12.74 | 13.53 | 0.44 |
| 433.1059 | 64.04  | 18.01 | 19.32 | 19.36 | 18.54 | 0.82 |
| 433.2025 | 25.95  | 16.88 | 18.34 | 17.11 | 18.03 | 0.77 |
| 433.2250 | 76.31  | 16.98 | 16.65 | 17.10 | 15.19 | 0.16 |
| 433.2659 | 25.35  | 17.20 | 12.48 | 12.12 | 12.55 | 1.85 |
| 433.2848 | 24.96  | 18.28 | 18.51 | 18.47 | 18.78 | 0.19 |
| 433.7672 | 48.1   | 17.52 | 18.54 | 18.75 | 17.74 | 0.77 |
| 433.7823 | 28.24  | 16.01 | 19.74 | 18.55 | 19.45 | 1.55 |
| 433.8647 | 42.04  | 16.07 | 15.88 | 16.05 | 16.03 | 0.11 |
| 433.9029 | 52.05  | 16.68 | 17.59 | 17.49 | 17.36 | 0.70 |
| 433.9283 | 50.3   | 13.98 | 14.20 | 15.64 | 15.00 | 0.42 |
| 433.9441 | 51.3   | 18.07 | 17.76 | 18.09 | 17.58 | 0.18 |
| 433.9841 | 304.67 | 8.44  | 16.91 | 14.54 | 12.94 | 1.64 |
| 433.9858 | 82.12  | 16.51 | 19.38 | 19.50 | 18.59 | 1.39 |
| 434.0614 | 171.23 | 11.98 | 14.94 | 14.39 | 15.76 | 0.80 |
| 434.0677 | 73.3   | 17.66 | 13.72 | 13.50 | 14.27 | 1.44 |
| 434.0833 | 77.73  | 15.65 | 16.90 | 16.05 | 17.13 | 0.52 |
| 434.1095 | 64.92  | 14.92 | 14.61 | 14.80 | 14.68 | 0.15 |
| 434.1179 | 281.72 | 18.22 | 19.44 | 19.72 | 18.51 | 0.82 |
| 434.2859 | 25.5   | 16.18 | 18.57 | 17.64 | 18.67 | 1.24 |
| 434.6190 | 282.94 | 16.30 | 17.01 | 17.22 | 16.54 | 0.40 |
| 434.6360 | 46.85  | 18.57 | 18.42 | 18.48 | 17.91 | 0.24 |
| 434.6802 | 46.38  | 17.63 | 18.51 | 18.42 | 18.04 | 0.89 |
| 434.7615 | 31.84  | 16.41 | 20.74 | 19.83 | 20.21 | 1.77 |
| 434.7723 | 47.69  | 18.03 | 20.55 | 20.55 | 20.17 | 1.68 |
| 434.8235 | 46.3   | 13.57 | 13.33 | 14.44 | 14.01 | 0.12 |
| 434.8571 | 30.1   | 17.31 | 17.55 | 17.71 | 17.12 | 0.19 |
| 434.8945 | 54.71  | 17.96 | 20.42 | 20.49 | 19.78 | 1.52 |
| 434.9883 | 75.56  | 13.65 | 15.44 | 15.10 | 15.66 | 0.81 |
| 435.0158 | 48.22  | 16.89 | 15.27 | 13.06 | 13.52 | 1.05 |
| 435.0634 | 176.92 | 12.93 | 14.34 | 13.48 | 14.73 | 0.36 |
| 435.1088 | 74.61  | 15.86 | 16.56 | 15.47 | 15.37 | 0.07 |
| 435.2635 | 26.16  | 16.12 | 19.90 | 18.01 | 19.03 | 1.33 |
| 435.2952 | 207.43 | 16.13 | 10.09 | 12.15 | 11.65 | 1.58 |
| 435.7327 | 28.82  | 12.15 | 16.89 | 17.31 | 15.65 | 1.15 |
| 435.7674 | 39.37  | 17.47 | 21.06 | 20.39 | 20.72 | 1.85 |
| 435.8942 | 271.48 | 15.59 | 15.41 | 16.93 | 14.89 | 0.12 |
| 435.8949 | 160.82 | 10.64 | 13.79 | 14.25 | 12.96 | 0.91 |
| 435.9401 | 45.32  | 16.91 | 15.60 | 15.53 | 15.91 | 0.71 |
| 435.9891 | 52.48  | 22.33 | 23.03 | 23.34 | 22.49 | 0.92 |
| 436.0370 | 61.34  | 17.11 | 18.36 | 19.77 | 18.52 | 1.32 |
| 436.0616 | 272.13 | 16.25 | 17.08 | 17.58 | 16.39 | 0.52 |
| 436.0620 | 160.35 | 10.30 | 15.78 | 14.74 | 14.11 | 1.53 |
| 436.0916 | 40.18  | 15.59 | 18.57 | 13.94 | 13.59 | 0.21 |
| 436.2289 | 268.13 | 14.47 | 16.68 | 17.21 | 15.44 | 0.93 |
| 436.2292 | 162.74 | 7.71  | 15.44 | 15.11 | 13.30 | 1.66 |
| 436.2711 | 25.8   | 16.15 | 19.65 | 18.16 | 18.98 | 1.44 |
| 436.2819 | 27.66  | 16.78 | 13.30 | 15.25 | 14.36 | 0.91 |
| 436.3051 | 23.12  | 15.27 | 15.63 | 14.73 | 14.06 | 0.10 |

|          |        |       |       |       |       |      |
|----------|--------|-------|-------|-------|-------|------|
| 436.3961 | 154.02 | 10.54 | 14.07 | 13.67 | 13.72 | 1.54 |
| 436.6329 | 52.06  | 19.70 | 19.69 | 19.76 | 19.13 | 0.08 |
| 436.6826 | 48.66  | 15.45 | 14.28 | 14.71 | 14.34 | 0.60 |
| 436.7407 | 29.72  | 11.68 | 13.30 | 16.80 | 15.75 | 0.81 |
| 436.7639 | 44.97  | 13.95 | 13.85 | 13.77 | 14.50 | 0.02 |
| 436.7716 | 39.86  | 17.97 | 21.79 | 20.77 | 21.33 | 1.84 |
| 436.8567 | 51.58  | 17.93 | 19.34 | 19.43 | 19.56 | 1.30 |
| 436.8674 | 64.94  | 13.92 | 13.81 | 13.56 | 13.46 | 0.12 |
| 436.8922 | 57.95  | 15.64 | 17.92 | 17.98 | 17.41 | 1.51 |
| 436.9438 | 78.41  | 13.09 | 12.91 | 14.34 | 14.83 | 0.21 |
| 436.9929 | 52.59  | 18.16 | 18.51 | 18.98 | 17.95 | 0.51 |
| 437.0440 | 80.49  | 16.62 | 15.33 | 14.89 | 16.31 | 0.60 |
| 437.0764 | 96.3   | 20.23 | 15.79 | 17.89 | 16.61 | 1.45 |
| 437.0853 | 83.58  | 14.63 | 15.66 | 15.29 | 14.94 | 0.50 |
| 437.0979 | 284.36 | 14.15 | 16.46 | 15.30 | 15.36 | 0.97 |
| 437.1001 | 76.95  | 9.14  | 13.54 | 7.71  | 8.18  | 0.48 |
| 437.1336 | 266.79 | 17.80 | 18.46 | 19.44 | 19.43 | 0.75 |
| 437.1522 | 208.04 | 7.77  | 14.65 | 13.55 | 12.63 | 1.63 |
| 437.2430 | 32.02  | 12.13 | 11.81 | 16.22 | 14.34 | 0.40 |
| 437.2791 | 24.38  | 16.63 | 20.36 | 18.96 | 19.88 | 1.66 |
| 437.7487 | 264.31 | 18.47 | 14.21 | 13.06 | 15.82 | 1.45 |
| 437.7490 | 113.73 | 18.77 | 16.33 | 17.14 | 17.85 | 0.87 |
| 437.7624 | 49.41  | 16.89 | 18.10 | 18.45 | 17.79 | 0.90 |
| 437.7836 | 26.49  | 16.37 | 19.62 | 17.69 | 18.44 | 1.35 |
| 437.8499 | 50.79  | 16.88 | 18.84 | 19.07 | 18.28 | 1.34 |
| 437.9856 | 52.56  | 19.82 | 20.35 | 20.75 | 19.80 | 0.75 |
| 437.9872 | 247.4  | 15.75 | 15.61 | 16.15 | 15.56 | 0.04 |
| 438.0581 | 262.1  | 13.78 | 17.48 | 16.53 | 15.29 | 1.33 |
| 438.0649 | 61.22  | 17.64 | 15.11 | 17.53 | 16.73 | 0.62 |
| 438.1371 | 91.53  | 15.53 | 18.08 | 18.09 | 17.54 | 0.98 |
| 438.2507 | 126.07 | 17.52 | 15.77 | 16.16 | 16.80 | 0.66 |
| 438.2508 | 28.91  | 15.25 | 18.96 | 19.48 | 19.08 | 1.70 |
| 438.2871 | 26.52  | 14.67 | 18.33 | 14.93 | 16.29 | 0.66 |
| 438.2978 | 26.62  | 20.64 | 20.42 | 20.22 | 19.86 | 0.42 |
| 438.3213 | 23.41  | 17.52 | 18.70 | 18.04 | 17.61 | 0.51 |
| 438.6300 | 49.38  | 19.60 | 19.59 | 19.65 | 18.95 | 0.09 |
| 438.7062 | 114.06 | 13.00 | 14.67 | 12.75 | 14.55 | 0.36 |
| 438.7159 | 45.88  | 19.35 | 20.80 | 20.66 | 20.34 | 1.36 |
| 438.7569 | 126.73 | 17.66 | 15.82 | 16.13 | 15.60 | 0.80 |
| 438.7686 | 46.03  | 15.51 | 16.08 | 16.17 | 15.32 | 0.30 |
| 438.7924 | 33.03  | 13.71 | 16.31 | 13.52 | 13.83 | 0.35 |
| 438.8368 | 50.85  | 18.89 | 12.96 | 13.90 | 13.21 | 1.48 |
| 438.8559 | 49.71  | 15.56 | 17.58 | 17.85 | 17.91 | 1.31 |
| 438.9046 | 44.3   | 14.82 | 14.29 | 15.31 | 14.27 | 0.07 |
| 438.9876 | 56.38  | 15.75 | 14.78 | 15.01 | 13.92 | 0.52 |
| 439.1005 | 305.26 | 15.63 | 18.87 | 18.04 | 16.56 | 1.33 |
| 439.1162 | 101    | 18.19 | 14.71 | 15.11 | 15.44 | 1.61 |
| 439.1295 | 82.12  | 13.55 | 15.15 | 14.90 | 14.55 | 0.53 |
| 439.1404 | 93.78  | 9.95  | 13.63 | 12.12 | 12.58 | 0.78 |
| 439.2584 | 29.33  | 14.10 | 17.93 | 18.33 | 17.15 | 1.35 |
| 439.3012 | 27.1   | 18.36 | 17.88 | 17.70 | 17.59 | 0.66 |
| 439.3240 | 23.3   | 15.18 | 15.58 | 14.44 | 14.07 | 0.11 |
| 439.7619 | 39.72  | 15.78 | 17.82 | 17.70 | 18.12 | 1.19 |
| 439.8473 | 49.84  | 15.72 | 18.36 | 18.64 | 17.79 | 1.66 |
| 439.9366 | 50.57  | 11.40 | 13.30 | 14.37 | 13.21 | 0.75 |
| 439.9821 | 52.66  | 15.66 | 14.51 | 15.51 | 13.87 | 0.42 |

|          |        |       |       |       |       |      |
|----------|--------|-------|-------|-------|-------|------|
| 440.0883 | 298.52 | 14.02 | 13.37 | 14.71 | 13.58 | 0.05 |
| 440.1042 | 307.25 | 12.87 | 15.33 | 13.47 | 11.98 | 0.53 |
| 440.2662 | 28.94  | 14.90 | 15.53 | 16.58 | 15.89 | 0.37 |
| 440.3359 | 23.77  | 20.12 | 21.19 | 20.54 | 20.26 | 0.54 |
| 440.3732 | 22.71  | 16.60 | 13.30 | 14.58 | 15.39 | 1.04 |
| 440.6274 | 47.56  | 18.80 | 18.57 | 18.66 | 18.05 | 0.35 |
| 440.7132 | 45.83  | 19.57 | 21.19 | 21.07 | 20.67 | 1.38 |
| 440.7253 | 48.9   | 15.29 | 14.88 | 15.50 | 16.36 | 0.01 |
| 440.8341 | 50.07  | 18.50 | 13.06 | 13.46 | 14.00 | 1.85 |
| 440.9197 | 25.98  | 12.57 | 15.52 | 15.26 | 14.77 | 1.40 |
| 441.0460 | 53.29  | 16.17 | 17.41 | 17.87 | 17.51 | 1.12 |
| 441.0666 | 221.97 | 9.80  | 16.54 | 17.58 | 16.06 | 1.81 |
| 441.0692 | 68.4   | 17.12 | 14.80 | 15.39 | 15.40 | 1.00 |
| 441.1763 | 89.86  | 21.67 | 22.46 | 22.38 | 21.69 | 0.61 |
| 441.2971 | 52.71  | 19.17 | 17.91 | 18.11 | 17.94 | 1.72 |
| 441.3403 | 23.4   | 18.19 | 19.02 | 18.37 | 18.13 | 0.38 |
| 441.5682 | 225.27 | 10.35 | 14.46 | 14.33 | 13.82 | 1.45 |
| 441.7374 | 56.82  | 15.02 | 16.07 | 16.01 | 16.21 | 0.57 |
| 441.8507 | 116.82 | 12.69 | 15.33 | 10.06 | 15.41 | 0.21 |
| 441.9224 | 82.99  | 15.28 | 20.26 | 20.01 | 18.50 | 1.79 |
| 441.9349 | 53.05  | 20.27 | 19.22 | 19.04 | 18.62 | 0.97 |
| 441.9720 | 261.41 | 19.33 | 20.23 | 20.89 | 19.56 | 0.77 |
| 441.9970 | 54.17  | 22.32 | 24.07 | 23.79 | 22.97 | 1.09 |
| 442.0093 | 97.74  | 15.95 | 17.32 | 16.42 | 16.48 | 0.67 |
| 442.0359 | 87.9   | 16.08 | 19.34 | 19.49 | 18.25 | 1.68 |
| 442.0428 | 56.59  | 15.68 | 16.44 | 17.09 | 16.66 | 0.82 |
| 442.0533 | 60.42  | 16.20 | 14.62 | 15.41 | 14.56 | 0.45 |
| 442.1260 | 73.29  | 16.87 | 17.12 | 17.47 | 16.16 | 0.14 |
| 442.1798 | 85.64  | 18.60 | 19.36 | 18.98 | 18.29 | 0.37 |
| 442.3525 | 23.62  | 21.54 | 22.33 | 21.61 | 21.43 | 0.28 |
| 442.6252 | 46.94  | 17.13 | 16.55 | 16.60 | 15.96 | 0.59 |
| 442.7113 | 45.89  | 18.68 | 20.19 | 20.08 | 19.70 | 1.51 |
| 442.7225 | 48.75  | 16.60 | 16.10 | 15.86 | 16.39 | 0.29 |
| 442.7642 | 46.51  | 14.92 | 16.28 | 16.65 | 15.66 | 0.97 |
| 442.8002 | 46.55  | 18.11 | 20.09 | 20.25 | 20.09 | 1.75 |
| 442.8538 | 21     | 16.18 | 14.06 | 15.40 | 15.27 | 0.76 |
| 442.8939 | 44.89  | 14.85 | 14.68 | 14.71 | 14.45 | 0.13 |
| 442.9277 | 57.35  | 18.91 | 20.27 | 20.04 | 19.61 | 0.92 |
| 442.9392 | 51.17  | 15.96 | 14.81 | 12.91 | 13.59 | 0.84 |
| 442.9602 | 87.02  | 13.61 | 14.64 | 15.56 | 14.81 | 0.73 |
| 442.9733 | 116.22 | 11.88 | 13.35 | 10.72 | 10.83 | 0.03 |
| 442.9754 | 259.5  | 15.08 | 14.60 | 15.39 | 13.62 | 0.16 |
| 443.0003 | 58.06  | 17.99 | 19.87 | 19.58 | 18.73 | 1.10 |
| 443.0379 | 88.01  | 10.48 | 14.91 | 14.75 | 13.78 | 1.24 |
| 443.0385 | 252.22 | 15.39 | 16.80 | 16.36 | 15.64 | 0.49 |
| 443.0627 | 82.32  | 18.00 | 20.22 | 19.83 | 19.48 | 1.15 |
| 443.0782 | 59.15  | 16.68 | 16.25 | 16.88 | 16.87 | 0.06 |
| 443.1809 | 86.5   | 16.07 | 15.32 | 14.75 | 13.79 | 0.64 |
| 443.2380 | 72.3   | 14.40 | 15.02 | 14.95 | 14.26 | 0.24 |
| 443.2677 | 22.07  | 15.38 | 15.31 | 12.92 | 12.66 | 0.35 |
| 443.3558 | 23.25  | 19.65 | 20.25 | 19.51 | 19.48 | 0.17 |
| 443.5691 | 96.88  | 13.22 | 16.39 | 16.72 | 15.87 | 1.54 |
| 443.7580 | 27.42  | 16.81 | 18.95 | 18.20 | 19.48 | 1.00 |
| 443.7982 | 50.1   | 15.67 | 18.09 | 18.29 | 17.61 | 1.51 |
| 443.9188 | 83.62  | 13.55 | 15.59 | 15.45 | 14.38 | 0.64 |
| 443.9315 | 47.75  | 16.54 | 17.25 | 16.43 | 16.36 | 0.11 |

|          |        |       |       |       |       |      |
|----------|--------|-------|-------|-------|-------|------|
| 443.9716 | 45.06  | 14.98 | 15.94 | 16.60 | 16.20 | 0.72 |
| 443.9929 | 53.49  | 19.24 | 21.04 | 20.79 | 20.01 | 1.17 |
| 444.0144 | 111.07 | 13.70 | 14.80 | 15.29 | 13.90 | 0.30 |
| 444.0637 | 73.23  | 15.63 | 13.57 | 15.86 | 13.55 | 0.51 |
| 444.2169 | 29.97  | 13.47 | 11.04 | 16.56 | 12.77 | 0.03 |
| 444.2607 | 26.69  | 14.71 | 17.87 | 16.30 | 18.22 | 1.04 |
| 444.3102 | 22.92  | 14.80 | 14.97 | 13.87 | 13.43 | 0.22 |
| 444.3587 | 23.32  | 16.25 | 16.30 | 15.23 | 15.85 | 0.28 |
| 444.3681 | 23.17  | 19.71 | 19.77 | 19.19 | 18.93 | 0.23 |
| 444.5773 | 79.8   | 13.54 | 14.29 | 15.35 | 14.87 | 0.35 |
| 444.6646 | 46.89  | 18.02 | 18.84 | 18.88 | 18.24 | 0.90 |
| 444.6735 | 52.82  | 15.87 | 15.77 | 15.05 | 15.90 | 0.15 |
| 444.7125 | 46.61  | 17.15 | 18.20 | 18.11 | 17.96 | 1.02 |
| 444.7642 | 36.85  | 16.91 | 16.05 | 16.12 | 17.29 | 0.30 |
| 444.7854 | 27.85  | 15.60 | 18.52 | 16.58 | 18.26 | 1.14 |
| 444.8012 | 37.89  | 18.35 | 19.87 | 19.99 | 19.83 | 1.65 |
| 444.8928 | 41.92  | 13.66 | 15.51 | 14.15 | 14.76 | 0.53 |
| 444.9256 | 52.89  | 17.81 | 18.55 | 18.47 | 18.27 | 0.67 |
| 444.9687 | 52.95  | 16.16 | 16.91 | 17.79 | 15.29 | 0.41 |
| 445.0116 | 95.29  | 14.63 | 15.68 | 14.90 | 15.13 | 0.39 |
| 445.0378 | 80.96  | 15.44 | 17.99 | 18.11 | 16.57 | 1.42 |
| 445.1199 | 23.62  | 17.85 | 16.89 | 17.31 | 17.70 | 0.43 |
| 445.1200 | 149.7  | 16.43 | 14.22 | 14.53 | 14.86 | 1.29 |
| 445.2870 | 27.46  | 15.51 | 17.38 | 15.65 | 17.15 | 0.62 |
| 445.3707 | 23.18  | 17.74 | 17.34 | 16.66 | 16.87 | 0.61 |
| 445.5636 | 257.8  | 14.82 | 17.62 | 16.27 | 14.85 | 1.02 |
| 445.5969 | 137.93 | 14.81 | 14.58 | 12.89 | 12.69 | 0.57 |
| 445.7827 | 26.27  | 15.35 | 17.20 | 16.19 | 17.62 | 0.89 |
| 445.7938 | 43.18  | 16.61 | 18.96 | 18.44 | 18.67 | 1.41 |
| 445.9501 | 43.02  | 13.89 | 15.64 | 14.77 | 16.45 | 0.70 |
| 445.9885 | 52.59  | 14.83 | 14.80 | 14.37 | 14.14 | 0.16 |
| 446.0064 | 91.83  | 15.51 | 17.07 | 17.21 | 16.61 | 1.25 |
| 446.0161 | 94.53  | 14.31 | 15.12 | 13.44 | 14.24 | 0.03 |
| 446.0342 | 93.71  | 15.20 | 16.29 | 16.68 | 15.05 | 0.52 |
| 446.0547 | 83.1   | 14.74 | 14.86 | 14.62 | 15.42 | 0.07 |
| 446.1052 | 294.75 | 12.70 | 14.99 | 15.26 | 13.71 | 1.02 |
| 446.2844 | 26.44  | 14.72 | 15.61 | 14.16 | 16.63 | 0.24 |
| 446.2950 | 27.28  | 15.17 | 16.88 | 13.87 | 16.41 | 0.24 |
| 446.3262 | 23.06  | 18.80 | 18.99 | 19.17 | 18.60 | 0.15 |
| 446.3991 | 22.5   | 15.21 | 11.77 | 13.44 | 13.52 | 1.06 |
| 446.6627 | 46.64  | 18.86 | 19.79 | 19.83 | 19.20 | 1.02 |
| 446.6706 | 51.32  | 17.72 | 17.68 | 17.58 | 17.77 | 0.04 |
| 446.7618 | 26.24  | 13.90 | 18.77 | 16.76 | 17.73 | 1.50 |
| 446.7982 | 43.08  | 15.36 | 17.78 | 18.04 | 17.72 | 1.55 |
| 446.8498 | 48.96  | 13.61 | 13.93 | 14.07 | 14.25 | 0.20 |
| 446.8877 | 51.19  | 19.07 | 18.35 | 18.20 | 18.50 | 0.77 |
| 446.9108 | 35.71  | 15.48 | 18.37 | 17.98 | 18.02 | 1.46 |
| 446.9746 | 49.66  | 13.94 | 13.91 | 14.95 | 14.29 | 0.28 |
| 446.9770 | 307.73 | 13.06 | 14.48 | 13.75 | 13.87 | 0.70 |
| 447.0353 | 89.81  | 11.03 | 13.62 | 12.87 | 11.82 | 0.72 |
| 447.0675 | 264.29 | 20.41 | 22.12 | 22.71 | 21.61 | 1.27 |
| 447.1003 | 227.7  | 13.26 | 14.63 | 14.68 | 13.93 | 0.52 |
| 447.1370 | 280.69 | 15.39 | 16.27 | 15.97 | 15.71 | 0.57 |
| 447.2629 | 25.22  | 15.54 | 17.92 | 16.44 | 17.49 | 1.13 |
| 447.3294 | 22.99  | 16.76 | 16.52 | 16.92 | 16.27 | 0.08 |
| 447.6877 | 115.3  | 14.08 | 16.24 | 17.17 | 16.75 | 1.18 |

|          |        |       |       |       |       |      |
|----------|--------|-------|-------|-------|-------|------|
| 447.7333 | 28.76  | 8.88  | 17.05 | 16.97 | 16.48 | 1.77 |
| 447.7676 | 35.35  | 16.66 | 16.87 | 15.51 | 15.60 | 0.27 |
| 447.7910 | 49.2   | 15.30 | 16.63 | 16.74 | 15.89 | 1.02 |
| 447.8428 | 52.87  | 16.02 | 13.12 | 13.68 | 13.91 | 1.18 |
| 447.8807 | 51.57  | 17.83 | 18.65 | 18.93 | 18.28 | 0.74 |
| 447.9492 | 103.88 | 13.88 | 12.95 | 14.32 | 14.73 | 0.05 |
| 447.9711 | 50.27  | 15.26 | 15.87 | 16.12 | 15.39 | 0.55 |
| 447.9884 | 274.32 | 15.31 | 16.58 | 17.55 | 16.36 | 0.74 |
| 447.9885 | 98.91  | 14.11 | 19.42 | 19.10 | 18.71 | 1.76 |
| 448.0295 | 107.27 | 16.54 | 19.51 | 17.62 | 18.11 | 0.98 |
| 448.0538 | 69.86  | 17.39 | 19.66 | 19.26 | 18.70 | 1.49 |
| 448.0711 | 258.12 | 16.63 | 19.11 | 19.10 | 17.90 | 1.30 |
| 448.1432 | 68.61  | 15.42 | 15.82 | 14.28 | 14.50 | 0.18 |
| 448.1897 | 115.72 | 12.46 | 13.88 | 14.95 | 14.33 | 0.88 |
| 448.2392 | 272    | 15.08 | 16.71 | 17.37 | 16.47 | 0.79 |
| 448.2396 | 111.13 | 12.06 | 19.05 | 19.29 | 18.14 | 1.91 |
| 448.3419 | 22.9   | 22.22 | 21.75 | 21.99 | 21.85 | 0.27 |
| 448.4905 | 110.67 | 11.59 | 17.51 | 17.73 | 16.85 | 1.92 |
| 448.6591 | 46.58  | 18.50 | 19.40 | 19.44 | 18.84 | 1.02 |
| 448.6677 | 51.75  | 17.61 | 17.59 | 17.51 | 17.70 | 0.02 |
| 448.7476 | 49.28  | 19.38 | 21.03 | 20.92 | 20.71 | 1.50 |
| 448.7998 | 40.2   | 14.45 | 14.29 | 14.47 | 13.12 | 0.14 |
| 448.8348 | 28.46  | 17.45 | 17.86 | 18.01 | 17.37 | 0.39 |
| 448.8718 | 43.79  | 19.08 | 20.99 | 21.19 | 20.43 | 1.32 |
| 448.9324 | 45.41  | 14.84 | 15.24 | 15.61 | 15.56 | 0.44 |
| 448.9510 | 40.63  | 13.31 | 18.61 | 17.60 | 17.44 | 1.68 |
| 448.9515 | 172.88 | 12.93 | 12.98 | 13.60 | 12.50 | 0.08 |
| 449.0569 | 92.5   | 12.60 | 14.44 | 12.80 | 13.13 | 0.46 |
| 449.0763 | 207.29 | 16.99 | 15.07 | 14.88 | 17.84 | 0.68 |
| 449.1975 | 27.53  | 14.81 | 19.77 | 18.80 | 18.98 | 1.86 |
| 449.2663 | 33.34  | 17.65 | 13.42 | 14.10 | 14.79 | 1.38 |
| 449.3454 | 22.94  | 20.48 | 19.77 | 20.05 | 20.01 | 0.44 |
| 449.7430 | 47.42  | 17.37 | 18.48 | 18.79 | 18.63 | 1.13 |
| 449.7630 | 46.29  | 16.64 | 14.12 | 13.51 | 14.28 | 1.12 |
| 449.8385 | 43.12  | 16.13 | 15.21 | 14.82 | 15.03 | 0.81 |
| 449.8693 | 46.72  | 13.42 | 13.27 | 12.18 | 14.09 | 0.20 |
| 449.8775 | 51.14  | 16.45 | 17.78 | 18.11 | 17.40 | 1.05 |
| 449.9645 | 103.26 | 15.45 | 14.67 | 16.10 | 14.90 | 0.08 |
| 450.0587 | 80.51  | 19.19 | 16.95 | 16.17 | 16.45 | 1.35 |
| 450.0806 | 198.3  | 18.13 | 16.85 | 17.15 | 18.62 | 0.42 |
| 450.2008 | 27.62  | 14.59 | 16.83 | 14.92 | 16.49 | 0.70 |
| 450.2975 | 26.27  | 15.12 | 16.19 | 13.61 | 14.86 | 0.04 |
| 450.3478 | 23.12  | 17.36 | 15.93 | 16.41 | 16.38 | 0.67 |
| 450.3576 | 23.14  | 19.22 | 18.77 | 18.71 | 18.46 | 0.40 |
| 450.6096 | 46.28  | 18.55 | 18.04 | 18.22 | 17.45 | 0.49 |
| 450.6573 | 46.73  | 17.34 | 17.99 | 18.04 | 17.47 | 0.82 |
| 450.6648 | 52.92  | 16.80 | 16.52 | 16.34 | 16.70 | 0.18 |
| 450.7387 | 34.22  | 19.22 | 21.30 | 20.95 | 21.00 | 1.66 |
| 450.7541 | 48.77  | 15.94 | 17.11 | 16.89 | 17.56 | 0.58 |
| 450.7959 | 46.61  | 13.76 | 16.63 | 16.65 | 15.21 | 1.46 |
| 450.8348 | 39.16  | 17.38 | 15.48 | 16.13 | 15.31 | 0.97 |
| 450.8697 | 53.96  | 18.07 | 20.61 | 20.81 | 19.92 | 1.30 |
| 450.9485 | 41.02  | 12.66 | 14.87 | 12.34 | 13.44 | 0.49 |
| 450.9655 | 37.51  | 14.78 | 19.14 | 18.62 | 18.25 | 1.88 |
| 451.0497 | 38.84  | 14.91 | 15.55 | 17.39 | 14.89 | 0.59 |
| 451.0804 | 81.33  | 16.64 | 17.37 | 15.61 | 16.62 | 0.03 |

|          |        |       |       |       |       |      |
|----------|--------|-------|-------|-------|-------|------|
| 451.3610 | 23.01  | 17.39 | 16.39 | 16.36 | 16.43 | 0.74 |
| 451.7400 | 44.22  | 18.07 | 17.98 | 18.07 | 17.51 | 0.11 |
| 451.7604 | 40.4   | 16.15 | 13.46 | 13.81 | 16.00 | 0.74 |
| 451.8732 | 49.6   | 14.29 | 15.52 | 15.15 | 14.86 | 0.60 |
| 451.9535 | 55.2   | 17.83 | 14.97 | 16.96 | 16.44 | 1.02 |
| 451.9633 | 52.57  | 20.79 | 19.60 | 20.22 | 19.33 | 0.71 |
| 451.9942 | 305.5  | 11.20 | 17.10 | 13.66 | 13.27 | 1.21 |
| 452.0935 | 83.63  | 13.87 | 18.11 | 17.41 | 17.79 | 1.57 |
| 452.2769 | 27.57  | 18.13 | 17.82 | 17.17 | 17.25 | 0.48 |
| 452.3733 | 23.05  | 19.08 | 18.58 | 18.88 | 18.35 | 0.29 |
| 452.6078 | 45.99  | 19.61 | 19.41 | 19.56 | 18.97 | 0.26 |
| 452.7420 | 46.61  | 18.28 | 19.60 | 19.53 | 19.48 | 1.47 |
| 452.7647 | 27.64  | 15.72 | 19.06 | 18.35 | 19.36 | 1.34 |
| 452.7942 | 46.63  | 10.90 | 16.43 | 16.43 | 15.01 | 1.77 |
| 452.8314 | 49.24  | 17.83 | 19.07 | 19.41 | 19.19 | 1.45 |
| 452.8665 | 57.09  | 16.01 | 18.38 | 18.70 | 17.80 | 1.36 |
| 452.9569 | 54.21  | 21.19 | 21.21 | 20.72 | 20.12 | 0.26 |
| 453.0729 | 71.47  | 15.80 | 17.13 | 17.78 | 16.78 | 1.06 |
| 453.2093 | 31.38  | 17.18 | 18.13 | 17.39 | 18.59 | 0.52 |
| 453.2355 | 32.1   | 13.16 | 14.94 | 16.88 | 16.47 | 0.81 |
| 453.2663 | 27.07  | 14.52 | 17.13 | 16.94 | 18.25 | 0.99 |
| 453.3767 | 22.9   | 17.04 | 16.03 | 16.55 | 16.29 | 0.51 |
| 453.7366 | 46.29  | 17.40 | 17.42 | 17.42 | 17.71 | 0.06 |
| 453.7815 | 43.84  | 16.22 | 13.80 | 12.04 | 13.68 | 0.99 |
| 453.8242 | 46.17  | 16.70 | 18.06 | 18.38 | 17.49 | 1.06 |
| 453.9555 | 49.84  | 19.50 | 17.94 | 18.43 | 17.73 | 1.04 |
| 454.0907 | 82.77  | 14.34 | 14.43 | 12.79 | 14.52 | 0.27 |
| 454.2927 | 29.46  | 21.46 | 21.25 | 21.07 | 20.62 | 0.51 |
| 454.3881 | 23.07  | 19.36 | 18.28 | 18.57 | 18.44 | 0.77 |
| 454.6046 | 47.4   | 19.45 | 19.22 | 19.34 | 18.69 | 0.24 |
| 454.6308 | 280.68 | 18.33 | 19.04 | 19.32 | 18.54 | 0.69 |
| 454.6944 | 46.68  | 17.96 | 19.33 | 19.39 | 18.87 | 1.40 |
| 454.7023 | 48.18  | 17.06 | 17.46 | 17.26 | 17.44 | 0.26 |
| 454.7442 | 49.1   | 16.09 | 16.48 | 16.30 | 16.89 | 0.29 |
| 454.7669 | 44.32  | 13.95 | 13.43 | 15.46 | 14.06 | 0.13 |
| 454.7920 | 43.73  | 13.92 | 13.43 | 13.88 | 13.68 | 0.18 |
| 454.8300 | 48.19  | 16.02 | 17.61 | 17.96 | 17.80 | 1.43 |
| 454.8519 | 25.97  | 16.65 | 12.51 | 14.30 | 14.26 | 1.18 |
| 454.8643 | 83.95  | 14.34 | 15.26 | 15.87 | 15.03 | 0.59 |
| 454.8796 | 47.15  | 14.59 | 14.36 | 15.11 | 14.65 | 0.04 |
| 454.9544 | 54.62  | 17.83 | 17.10 | 16.09 | 16.09 | 0.74 |
| 455.0570 | 66.48  | 15.58 | 15.85 | 15.82 | 16.51 | 0.17 |
| 455.0754 | 70.74  | 14.44 | 13.32 | 14.56 | 13.29 | 0.23 |
| 455.1323 | 282.42 | 16.86 | 17.16 | 17.44 | 16.66 | 0.34 |
| 455.2961 | 27.51  | 19.25 | 18.90 | 18.76 | 18.46 | 0.75 |
| 455.3922 | 22.82  | 17.48 | 15.53 | 16.14 | 16.38 | 1.06 |
| 455.6341 | 278.85 | 14.94 | 13.74 | 14.39 | 13.96 | 0.51 |
| 455.7783 | 49.51  | 16.45 | 16.31 | 14.53 | 16.23 | 0.32 |
| 455.8229 | 49.74  | 16.00 | 17.66 | 17.99 | 17.00 | 1.19 |
| 455.9553 | 80.29  | 15.47 | 16.79 | 16.75 | 15.97 | 0.52 |
| 455.9858 | 41.02  | 14.55 | 16.87 | 16.48 | 16.12 | 1.44 |
| 456.0715 | 271.43 | 16.93 | 19.61 | 19.70 | 19.52 | 1.31 |
| 456.0937 | 83.2   | 13.05 | 15.16 | 13.83 | 15.02 | 0.62 |
| 456.1073 | 68.75  | 15.68 | 18.05 | 17.71 | 17.89 | 1.23 |
| 456.4045 | 22.76  | 17.52 | 15.20 | 15.47 | 15.63 | 1.32 |
| 456.5727 | 278.86 | 14.24 | 16.90 | 16.84 | 17.22 | 1.24 |

|          |        |       |       |       |       |      |
|----------|--------|-------|-------|-------|-------|------|
| 456.6024 | 46.23  | 18.87 | 18.35 | 18.53 | 17.75 | 0.46 |
| 456.6340 | 299.85 | 16.24 | 18.11 | 18.09 | 17.55 | 1.39 |
| 456.6449 | 128.79 | 8.69  | 14.20 | 13.43 | 13.79 | 1.56 |
| 456.6952 | 47.43  | 19.61 | 20.57 | 20.53 | 20.11 | 0.96 |
| 456.7418 | 47.48  | 14.51 | 14.10 | 15.42 | 14.19 | 0.05 |
| 456.7652 | 38.24  | 15.52 | 16.17 | 16.41 | 17.60 | 0.46 |
| 456.7854 | 27.53  | 15.02 | 19.22 | 17.73 | 18.55 | 1.62 |
| 456.8452 | 269.92 | 12.69 | 15.95 | 16.52 | 15.74 | 1.09 |
| 457.0427 | 266.96 | 12.59 | 13.68 | 15.46 | 14.90 | 0.60 |
| 457.0445 | 67.03  | 15.39 | 13.37 | 13.62 | 13.80 | 0.80 |
| 457.0919 | 66.92  | 14.88 | 12.85 | 15.07 | 13.49 | 0.52 |
| 457.1360 | 300.1  | 14.62 | 15.57 | 15.23 | 14.77 | 0.47 |
| 457.1684 | 86.46  | 15.85 | 14.93 | 15.57 | 15.18 | 0.33 |
| 457.2273 | 33.12  | 14.32 | 15.28 | 19.08 | 18.00 | 0.94 |
| 457.2713 | 45.03  | 19.34 | 18.08 | 18.46 | 18.44 | 1.62 |
| 457.2864 | 24.1   | 15.39 | 18.28 | 15.86 | 17.64 | 0.94 |
| 457.4075 | 22.55  | 14.49 | 10.57 | 11.36 | 11.25 | 1.26 |
| 457.5323 | 56.38  | 14.79 | 15.20 | 14.12 | 15.88 | 0.04 |
| 457.7266 | 29.96  | 9.11  | 11.67 | 17.76 | 15.96 | 1.10 |
| 457.7756 | 37.41  | 15.73 | 17.52 | 16.63 | 17.81 | 0.62 |
| 457.7943 | 32.66  | 14.96 | 16.88 | 14.22 | 16.68 | 0.33 |
| 457.8198 | 50.98  | 14.59 | 14.80 | 14.89 | 13.71 | 0.04 |
| 457.8247 | 117.59 | 12.49 | 14.09 | 9.83  | 14.09 | 0.00 |
| 457.8991 | 96.43  | 14.62 | 17.23 | 15.75 | 15.83 | 1.06 |
| 457.9084 | 53.66  | 19.77 | 18.62 | 18.80 | 18.25 | 0.82 |
| 457.9254 | 86.09  | 14.90 | 19.92 | 19.86 | 18.36 | 1.64 |
| 457.9711 | 52.08  | 21.74 | 22.82 | 23.19 | 22.06 | 0.96 |
| 458.0149 | 84.07  | 16.11 | 18.12 | 17.68 | 17.28 | 0.92 |
| 458.0758 | 62.1   | 15.62 | 18.21 | 18.88 | 17.78 | 1.49 |
| 458.2327 | 30.29  | 13.22 | 11.71 | 16.48 | 14.44 | 0.21 |
| 458.2751 | 41.93  | 17.00 | 16.79 | 16.36 | 17.88 | 0.14 |
| 458.3472 | 23.32  | 15.71 | 14.29 | 13.42 | 14.57 | 0.74 |
| 458.5995 | 46.38  | 17.49 | 16.50 | 16.67 | 15.99 | 0.83 |
| 458.6917 | 47.29  | 19.12 | 19.95 | 19.93 | 19.58 | 0.92 |
| 458.7376 | 48.29  | 14.07 | 16.06 | 16.87 | 15.83 | 1.07 |
| 458.7622 | 32.57  | 14.86 | 16.45 | 14.56 | 16.36 | 0.36 |
| 458.7739 | 45.46  | 18.57 | 20.68 | 20.54 | 20.68 | 1.70 |
| 458.7856 | 48.29  | 15.35 | 16.76 | 16.40 | 17.25 | 0.69 |
| 458.8008 | 26.56  | 14.65 | 17.12 | 13.28 | 16.70 | 0.36 |
| 458.8284 | 36.45  | 15.42 | 18.12 | 17.38 | 17.33 | 1.31 |
| 458.9023 | 51.81  | 18.78 | 19.81 | 20.09 | 19.12 | 0.76 |
| 458.9310 | 88.19  | 15.00 | 16.15 | 15.28 | 15.59 | 0.54 |
| 458.9473 | 113.62 | 12.48 | 13.72 | 11.51 | 14.09 | 0.16 |
| 458.9737 | 51.74  | 17.40 | 18.44 | 18.85 | 17.62 | 0.82 |
| 459.0120 | 55.99  | 16.24 | 15.44 | 13.12 | 14.43 | 0.59 |
| 459.0367 | 75.64  | 17.00 | 18.70 | 18.27 | 18.07 | 1.17 |
| 459.0562 | 37.34  | 13.93 | 11.16 | 15.68 | 12.79 | 0.28 |
| 459.0896 | 68.17  | 16.67 | 16.68 | 16.39 | 16.68 | 0.05 |
| 459.1156 | 78.22  | 13.56 | 14.48 | 14.37 | 15.01 | 0.35 |
| 459.2170 | 24.71  | 14.45 | 16.43 | 15.25 | 16.87 | 0.61 |
| 459.5995 | 303.72 | 14.32 | 14.13 | 14.33 | 13.77 | 0.09 |
| 459.6172 | 303.38 | 14.40 | 18.93 | 18.75 | 16.82 | 1.72 |
| 459.7745 | 48.25  | 16.42 | 18.25 | 18.24 | 18.20 | 1.59 |
| 459.9020 | 47.92  | 16.85 | 16.25 | 16.60 | 16.25 | 0.31 |
| 459.9559 | 49.45  | 15.49 | 14.22 | 15.15 | 14.99 | 0.43 |
| 459.9675 | 51.99  | 19.31 | 20.23 | 20.56 | 19.44 | 0.88 |

|          |        |       |       |       |       |      |
|----------|--------|-------|-------|-------|-------|------|
| 459.9829 | 141.13 | 15.77 | 16.76 | 17.30 | 16.81 | 0.99 |
| 460.0399 | 248.89 | 14.40 | 12.77 | 15.32 | 13.86 | 0.26 |
| 460.1184 | 303.56 | 15.10 | 16.95 | 16.86 | 14.99 | 0.90 |
| 460.2112 | 52.63  | 13.90 | 16.15 | 14.90 | 14.80 | 0.70 |
| 460.2713 | 26.78  | 11.56 | 16.48 | 11.58 | 14.96 | 0.67 |
| 460.5405 | 55.93  | 15.15 | 16.61 | 15.18 | 16.42 | 0.50 |
| 460.6388 | 46.05  | 17.70 | 18.35 | 18.45 | 17.83 | 0.73 |
| 460.6474 | 50.39  | 15.54 | 16.41 | 16.04 | 16.02 | 0.33 |
| 460.6903 | 47.53  | 17.53 | 18.28 | 18.26 | 17.93 | 0.75 |
| 460.7364 | 46.88  | 12.66 | 14.85 | 15.56 | 13.66 | 0.92 |
| 460.7744 | 45.37  | 18.63 | 20.19 | 20.21 | 20.27 | 1.63 |
| 460.7829 | 46.32  | 16.32 | 17.55 | 17.34 | 17.83 | 0.77 |
| 460.8220 | 44.41  | 16.00 | 17.71 | 17.39 | 17.27 | 1.35 |
| 460.8701 | 32.55  | 17.04 | 13.51 | 13.63 | 14.31 | 1.36 |
| 460.8995 | 51.88  | 17.95 | 18.54 | 18.85 | 17.90 | 0.52 |
| 460.9425 | 54.24  | 14.99 | 15.71 | 14.03 | 13.77 | 0.07 |
| 460.9672 | 249.31 | 13.39 | 15.94 | 16.21 | 14.50 | 0.72 |
| 461.0199 | 84.25  | 16.46 | 17.93 | 17.95 | 17.50 | 1.22 |
| 461.7460 | 31.92  | 12.68 | 14.94 | 17.29 | 16.14 | 0.87 |
| 461.7719 | 49.24  | 16.65 | 18.40 | 18.50 | 18.37 | 1.56 |
| 461.9637 | 52.29  | 14.05 | 14.29 | 15.07 | 14.24 | 0.29 |
| 462.0110 | 95.52  | 16.07 | 15.13 | 15.76 | 15.50 | 0.40 |
| 462.0714 | 270.68 | 14.82 | 14.70 | 16.33 | 15.16 | 0.39 |
| 462.1021 | 141.66 | 16.53 | 16.45 | 17.14 | 17.00 | 0.13 |
| 462.1462 | 20.54  | 16.34 | 12.98 | 13.44 | 14.67 | 0.98 |
| 462.1677 | 101.14 | 14.98 | 15.44 | 14.39 | 15.39 | 0.04 |
| 462.1941 | 96.93  | 14.83 | 16.70 | 16.21 | 15.88 | 1.23 |
| 462.2961 | 28.02  | 17.31 | 14.98 | 15.69 | 15.63 | 1.00 |
| 462.3208 | 23.35  | 16.62 | 17.72 | 16.74 | 15.88 | 0.24 |
| 462.6406 | 49.6   | 19.59 | 19.99 | 20.01 | 19.39 | 0.33 |
| 462.7531 | 31.59  | 12.04 | 15.68 | 16.46 | 15.00 | 0.94 |
| 462.7740 | 44.87  | 16.64 | 18.21 | 18.31 | 18.43 | 1.44 |
| 462.8262 | 39.04  | 15.21 | 16.06 | 16.45 | 15.84 | 0.93 |
| 462.8613 | 49.93  | 18.08 | 17.65 | 18.12 | 17.97 | 0.22 |
| 462.8850 | 39.47  | 16.33 | 20.37 | 19.96 | 19.73 | 1.88 |
| 463.0700 | 85.52  | 15.52 | 18.11 | 18.05 | 17.13 | 1.36 |
| 463.1579 | 83.09  | 16.96 | 18.15 | 16.56 | 16.95 | 0.30 |
| 463.2360 | 24.73  | 13.81 | 15.79 | 12.29 | 15.94 | 0.20 |
| 463.2591 | 261.76 | 17.94 | 15.42 | 14.83 | 15.12 | 1.24 |
| 463.2596 | 141.07 | 16.90 | 14.85 | 15.40 | 15.24 | 0.71 |
| 463.3242 | 23.01  | 14.00 | 13.96 | 13.04 | 12.72 | 0.25 |
| 463.3782 | 292    | 17.10 | 15.26 | 15.71 | 14.44 | 1.00 |
| 463.5882 | 64.18  | 14.70 | 16.12 | 16.49 | 15.66 | 1.07 |
| 463.7729 | 48.11  | 14.54 | 17.00 | 17.10 | 16.64 | 1.52 |
| 463.8534 | 49.79  | 17.46 | 17.38 | 18.17 | 16.62 | 0.06 |
| 463.8896 | 61.57  | 14.28 | 17.32 | 16.56 | 16.62 | 1.25 |
| 463.9790 | 53.34  | 22.08 | 23.71 | 23.39 | 22.57 | 0.92 |
| 464.0308 | 76.58  | 16.44 | 19.87 | 19.16 | 19.13 | 1.58 |
| 464.0811 | 278.51 | 16.54 | 22.68 | 22.53 | 20.87 | 1.84 |
| 464.1174 | 71.99  | 13.82 | 13.85 | 13.21 | 12.65 | 0.17 |
| 464.2620 | 48.43  | 13.63 | 13.99 | 15.24 | 13.70 | 0.24 |
| 464.3132 | 27.34  | 19.03 | 18.33 | 18.41 | 18.28 | 0.83 |
| 464.3368 | 23.26  | 18.62 | 18.90 | 18.35 | 18.28 | 0.02 |
| 464.3818 | 216.13 | 15.34 | 8.40  | 9.10  | 9.35  | 1.64 |
| 464.6368 | 48.47  | 19.47 | 19.77 | 19.77 | 19.21 | 0.24 |
| 464.7270 | 45.97  | 18.74 | 19.98 | 20.01 | 19.63 | 1.37 |



|          |        |       |       |       |       |      |
|----------|--------|-------|-------|-------|-------|------|
| 464.8082 | 33.14  | 16.07 | 14.95 | 15.71 | 15.96 | 0.43 |
| 464.8476 | 50.3   | 18.90 | 19.79 | 20.18 | 19.25 | 0.67 |
| 464.8789 | 29.01  | 14.95 | 18.33 | 17.92 | 17.75 | 1.99 |
| 464.9006 | 40.83  | 14.19 | 16.60 | 16.71 | 15.83 | 1.57 |
| 464.9111 | 52.13  | 13.87 | 12.60 | 14.48 | 14.40 | 0.12 |
| 464.9250 | 38.4   | 11.51 | 16.68 | 16.37 | 16.88 | 1.54 |
| 464.9267 | 156.64 | 13.60 | 17.25 | 17.43 | 16.15 | 1.15 |
| 464.9820 | 54.36  | 18.27 | 19.58 | 19.27 | 18.60 | 0.83 |
| 465.0449 | 198.62 | 15.98 | 13.17 | 14.28 | 15.83 | 0.80 |
| 465.0990 | 57.41  | 16.46 | 17.50 | 16.96 | 17.95 | 0.59 |
| 465.3166 | 27.03  | 16.58 | 13.87 | 14.24 | 14.90 | 1.12 |
| 465.3399 | 23.33  | 16.49 | 16.52 | 15.89 | 15.67 | 0.20 |
| 465.7156 | 48.36  | 17.06 | 12.35 | 12.73 | 13.14 | 1.38 |
| 465.8117 | 47.98  | 15.58 | 13.60 | 12.26 | 12.72 | 1.05 |
| 465.8512 | 51.57  | 16.63 | 16.88 | 17.24 | 16.50 | 0.27 |
| 465.9747 | 53.13  | 19.16 | 20.63 | 20.40 | 19.82 | 1.06 |
| 465.9827 | 296.83 | 10.85 | 13.54 | 13.31 | 11.15 | 0.73 |
| 465.9831 | 53     | 15.42 | 16.39 | 16.03 | 14.92 | 0.31 |
| 466.0450 | 206.31 | 16.53 | 14.14 | 15.30 | 15.94 | 0.68 |
| 466.0540 | 188.43 | 15.11 | 12.91 | 13.29 | 13.82 | 0.79 |
| 466.0624 | 167.02 | 13.41 | 18.30 | 17.91 | 16.68 | 1.67 |
| 466.0856 | 302.01 | 10.63 | 16.08 | 16.21 | 13.60 | 1.67 |
| 466.0858 | 174.61 | 11.31 | 15.25 | 14.20 | 12.79 | 1.13 |
| 466.1062 | 229.16 | 14.82 | 16.59 | 16.88 | 16.41 | 1.16 |
| 466.1092 | 76.73  | 9.54  | 15.34 | 14.43 | 13.94 | 1.52 |
| 466.1324 | 114.56 | 12.77 | 11.98 | 10.61 | 12.45 | 0.78 |
| 466.3291 | 27.02  | 17.29 | 16.00 | 15.68 | 16.26 | 0.90 |
| 466.3519 | 23.26  | 17.67 | 18.23 | 17.24 | 17.26 | 0.03 |
| 466.5847 | 45.61  | 18.71 | 17.86 | 17.95 | 17.62 | 0.87 |
| 466.6088 | 54.71  | 14.84 | 16.32 | 16.77 | 15.79 | 0.99 |
| 466.6351 | 49.74  | 18.50 | 18.61 | 18.62 | 18.04 | 0.03 |
| 466.7240 | 47.24  | 19.05 | 20.47 | 20.46 | 20.13 | 1.38 |
| 466.7735 | 40.79  | 15.67 | 17.00 | 17.40 | 17.77 | 0.78 |
| 466.8125 | 47.4   | 16.38 | 13.23 | 12.30 | 12.58 | 1.23 |
| 466.8448 | 36.35  | 18.48 | 19.70 | 20.00 | 19.19 | 0.90 |
| 466.8833 | 36.04  | 15.74 | 9.76  | 11.72 | 10.79 | 1.46 |
| 466.9399 | 39.57  | 17.32 | 21.80 | 21.29 | 20.43 | 1.92 |
| 467.0902 | 234.41 | 15.24 | 19.68 | 20.06 | 18.77 | 1.45 |
| 467.0998 | 51.58  | 15.58 | 13.81 | 13.92 | 14.97 | 0.70 |
| 467.1273 | 99.56  | 14.38 | 15.14 | 15.51 | 15.17 | 0.69 |
| 467.2786 | 33.57  | 17.49 | 16.27 | 15.90 | 17.44 | 0.66 |
| 467.3558 | 23.01  | 15.23 | 15.51 | 14.07 | 14.00 | 0.25 |
| 467.7133 | 48.41  | 17.67 | 14.61 | 14.79 | 14.00 | 0.94 |
| 467.8467 | 31.95  | 13.82 | 14.17 | 15.17 | 12.32 | 0.17 |
| 467.9266 | 53.99  | 16.57 | 11.28 | 11.83 | 12.78 | 1.90 |
| 467.9417 | 40.66  | 14.98 | 18.56 | 17.96 | 17.20 | 1.85 |
| 468.0166 | 142.33 | 14.63 | 15.84 | 14.29 | 14.05 | 0.20 |
| 468.0709 | 86.06  | 18.65 | 13.76 | 14.75 | 14.26 | 1.41 |
| 468.0936 | 228.5  | 11.74 | 15.60 | 16.31 | 15.11 | 1.74 |
| 468.1215 | 129.41 | 13.93 | 13.82 | 14.07 | 15.95 | 0.13 |
| 468.3084 | 28.56  | 21.14 | 20.38 | 20.27 | 19.98 | 0.90 |
| 468.3681 | 23.19  | 17.71 | 17.64 | 17.46 | 17.20 | 0.13 |
| 468.5819 | 45.57  | 19.60 | 19.24 | 19.32 | 18.77 | 0.38 |
| 468.6330 | 48     | 16.42 | 15.41 | 15.10 | 15.21 | 0.68 |
| 468.7206 | 47.28  | 18.28 | 19.48 | 19.50 | 19.28 | 1.31 |
| 468.7670 | 46.09  | 14.15 | 16.82 | 17.34 | 16.03 | 1.57 |

|          |        |       |       |       |       |      |
|----------|--------|-------|-------|-------|-------|------|
| 468.7853 | 27.92  | 13.50 | 18.32 | 16.42 | 17.61 | 1.52 |
| 468.8099 | 57.85  | 17.81 | 18.95 | 19.20 | 19.43 | 1.27 |
| 468.8415 | 42.01  | 16.91 | 17.76 | 17.98 | 16.51 | 0.46 |
| 468.9332 | 49.06  | 20.51 | 21.07 | 21.04 | 20.03 | 0.35 |
| 468.9598 | 84.48  | 15.05 | 17.95 | 17.17 | 16.53 | 1.29 |
| 469.0001 | 193.72 | 12.47 | 14.88 | 15.16 | 12.79 | 0.85 |
| 469.0479 | 59.42  | 15.99 | 17.43 | 18.14 | 17.73 | 0.96 |
| 469.0491 | 246.01 | 13.63 | 13.81 | 12.55 | 13.55 | 0.14 |
| 469.0721 | 88.65  | 14.98 | 16.06 | 15.99 | 14.71 | 0.31 |
| 469.0860 | 222.95 | 8.77  | 13.64 | 12.19 | 11.49 | 1.17 |
| 469.1247 | 129.39 | 15.24 | 16.72 | 16.06 | 16.73 | 0.81 |
| 469.2249 | 29.83  | 14.17 | 12.50 | 17.32 | 15.61 | 0.22 |
| 469.2876 | 26.62  | 15.30 | 17.09 | 14.60 | 16.97 | 0.41 |
| 469.3119 | 27.85  | 19.06 | 18.00 | 17.96 | 17.66 | 1.04 |
| 469.3713 | 23     | 15.41 | 14.02 | 13.93 | 14.43 | 0.58 |
| 469.7104 | 48.36  | 17.14 | 11.79 | 12.30 | 11.98 | 1.30 |
| 469.8045 | 46.35  | 16.56 | 18.46 | 18.00 | 18.20 | 1.49 |
| 469.9369 | 49.81  | 16.46 | 16.16 | 15.38 | 14.28 | 0.39 |
| 470.0045 | 305.45 | 9.58  | 18.95 | 17.42 | 13.72 | 1.68 |
| 470.0339 | 55.26  | 16.28 | 17.26 | 15.89 | 16.55 | 0.22 |
| 470.1285 | 135.44 | 9.09  | 12.44 | 11.82 | 12.29 | 1.00 |
| 470.2513 | 280.66 | 14.27 | 14.37 | 15.19 | 14.24 | 0.15 |
| 470.3256 | 23.09  | 16.31 | 14.17 | 16.21 | 16.00 | 0.55 |
| 470.3838 | 23.06  | 18.25 | 17.58 | 17.39 | 17.66 | 0.61 |
| 470.3946 | 281.07 | 15.67 | 15.61 | 15.73 | 15.20 | 0.04 |
| 470.5791 | 45.59  | 19.66 | 19.18 | 19.33 | 18.60 | 0.43 |
| 470.6724 | 46.91  | 18.65 | 19.53 | 19.54 | 19.01 | 1.01 |
| 470.7225 | 48.28  | 15.73 | 16.64 | 16.11 | 16.60 | 0.53 |
| 470.7662 | 46.36  | 13.73 | 14.82 | 15.43 | 13.88 | 0.80 |
| 470.8072 | 46.2   | 16.62 | 18.72 | 18.52 | 18.85 | 1.47 |
| 470.8550 | 47.76  | 13.68 | 15.53 | 15.77 | 15.19 | 0.97 |
| 470.9281 | 53.21  | 17.64 | 17.41 | 16.94 | 16.03 | 0.36 |
| 470.9688 | 48.07  | 13.99 | 14.41 | 15.60 | 16.17 | 0.55 |
| 471.0312 | 55.47  | 16.21 | 14.95 | 15.78 | 14.94 | 0.46 |
| 471.0532 | 70.53  | 17.70 | 19.36 | 20.09 | 18.71 | 1.09 |
| 471.0768 | 270.44 | 10.99 | 16.90 | 17.89 | 16.13 | 1.74 |
| 471.3036 | 32.06  | 14.31 | 15.42 | 13.33 | 15.63 | 0.16 |
| 471.3871 | 22.86  | 16.08 | 14.42 | 14.38 | 14.90 | 0.92 |
| 471.5316 | 55.27  | 14.56 | 16.51 | 15.93 | 15.98 | 0.99 |
| 471.5783 | 270.46 | 14.25 | 14.05 | 15.77 | 14.45 | 0.28 |
| 471.7964 | 50.44  | 15.74 | 14.96 | 15.19 | 14.52 | 0.34 |
| 471.8068 | 48.02  | 14.40 | 17.43 | 17.42 | 16.96 | 1.75 |
| 471.9660 | 53.97  | 14.58 | 14.87 | 14.64 | 14.28 | 0.06 |
| 472.0564 | 65.61  | 14.39 | 14.06 | 15.66 | 14.48 | 0.18 |
| 472.0892 | 91.25  | 14.21 | 15.26 | 12.96 | 14.25 | 0.02 |
| 472.2134 | 27.79  | 13.85 | 18.17 | 17.04 | 17.40 | 1.79 |
| 472.3418 | 23.14  | 18.94 | 17.69 | 18.42 | 18.47 | 0.61 |
| 472.5765 | 45.64  | 19.07 | 18.32 | 18.47 | 18.12 | 0.71 |
| 472.6685 | 46.68  | 19.45 | 20.46 | 20.43 | 19.99 | 1.11 |
| 472.8078 | 48.74  | 14.28 | 16.03 | 16.43 | 16.63 | 1.16 |
| 472.8498 | 45.84  | 12.80 | 15.03 | 17.12 | 15.23 | 1.42 |
| 472.9873 | 42.94  | 14.91 | 17.51 | 18.56 | 18.10 | 1.50 |
| 473.1190 | 232.03 | 12.45 | 14.92 | 14.97 | 16.01 | 0.92 |
| 473.1655 | 81.37  | 16.00 | 16.08 | 15.22 | 15.45 | 0.17 |
| 473.1778 | 40.71  | 17.74 | 14.73 | 16.05 | 16.38 | 1.18 |
| 473.1974 | 27.86  | 14.60 | 18.23 | 15.48 | 17.59 | 1.19 |

|          |        |       |       |       |       |      |
|----------|--------|-------|-------|-------|-------|------|
| 473.3173 | 23.06  | 16.21 | 13.31 | 14.74 | 13.78 | 1.28 |
| 473.3452 | 23.03  | 17.31 | 14.89 | 16.21 | 16.43 | 1.00 |
| 473.7706 | 37.3   | 12.66 | 10.72 | 16.25 | 12.79 | 0.11 |
| 473.8001 | 50.52  | 10.62 | 16.57 | 16.12 | 15.71 | 1.85 |
| 473.8785 | 33.81  | 18.73 | 17.75 | 18.69 | 17.18 | 0.46 |
| 473.9025 | 100.62 | 16.07 | 18.36 | 18.69 | 18.07 | 1.46 |
| 473.9452 | 50.9   | 20.60 | 20.29 | 21.10 | 19.82 | 0.07 |
| 474.0491 | 47.36  | 14.23 | 15.68 | 10.55 | 12.22 | 0.41 |
| 474.0640 | 58.3   | 14.45 | 14.75 | 15.96 | 15.46 | 0.31 |
| 474.3573 | 22.18  | 17.96 | 17.03 | 17.39 | 16.78 | 0.63 |
| 474.5737 | 45.67  | 17.81 | 16.58 | 16.65 | 16.36 | 0.97 |
| 474.6665 | 46.86  | 19.03 | 19.97 | 19.98 | 19.43 | 0.92 |
| 474.7112 | 45.71  | 16.02 | 16.53 | 16.95 | 15.89 | 0.35 |
| 474.7546 | 46.67  | 18.91 | 19.91 | 19.97 | 19.73 | 1.23 |
| 474.8487 | 45.77  | 15.62 | 15.61 | 16.06 | 15.56 | 0.14 |
| 474.8733 | 33.16  | 17.99 | 18.63 | 19.23 | 17.61 | 0.43 |
| 474.9453 | 52.69  | 16.71 | 14.25 | 15.56 | 14.13 | 0.71 |
| 474.9854 | 46.12  | 15.73 | 15.30 | 16.88 | 15.38 | 0.09 |
| 475.0450 | 278.44 | 15.61 | 17.15 | 16.96 | 17.54 | 0.75 |
| 475.0661 | 69.9   | 19.05 | 20.12 | 20.97 | 20.40 | 0.89 |
| 475.0920 | 84.63  | 12.56 | 15.76 | 15.24 | 14.28 | 0.95 |
| 475.0951 | 228.95 | 11.46 | 17.12 | 17.59 | 16.48 | 1.64 |
| 475.1100 | 92.27  | 15.91 | 18.52 | 18.90 | 17.35 | 1.52 |
| 475.1447 | 268.03 | 15.55 | 14.48 | 13.98 | 14.43 | 0.59 |
| 475.2131 | 27.62  | 14.79 | 18.47 | 16.87 | 17.99 | 1.64 |
| 475.2839 | 28.54  | 15.18 | 17.81 | 10.57 | 10.44 | 0.28 |
| 475.3611 | 22.82  | 16.04 | 13.54 | 14.47 | 13.75 | 1.01 |
| 475.7461 | 32.45  | 17.44 | 19.15 | 18.88 | 18.74 | 1.34 |
| 475.9135 | 55.3   | 11.87 | 11.25 | 13.06 | 12.97 | 0.13 |
| 475.9372 | 52.36  | 18.70 | 18.15 | 18.93 | 17.58 | 0.27 |
| 476.0335 | 86.91  | 16.23 | 20.18 | 20.99 | 19.48 | 1.67 |
| 476.2729 | 57.02  | 15.62 | 16.63 | 16.83 | 16.23 | 0.68 |
| 476.3103 | 25.07  | 19.57 | 19.41 | 18.49 | 18.82 | 0.63 |
| 476.3733 | 22.83  | 17.46 | 14.86 | 16.07 | 15.64 | 1.12 |
| 476.5848 | 242.01 | 14.27 | 14.05 | 15.45 | 14.54 | 0.19 |
| 476.6174 | 47.96  | 18.24 | 18.64 | 18.56 | 17.66 | 0.17 |
| 476.6611 | 46.24  | 16.02 | 17.14 | 17.26 | 16.61 | 1.17 |
| 476.7092 | 45.86  | 14.96 | 15.35 | 15.61 | 14.09 | 0.16 |
| 476.7521 | 45.14  | 19.16 | 20.19 | 20.24 | 20.02 | 1.28 |
| 476.7987 | 46.63  | 13.71 | 15.63 | 16.67 | 15.31 | 0.91 |
| 476.8437 | 32.83  | 16.53 | 16.10 | 16.34 | 16.22 | 0.31 |
| 476.8690 | 29.14  | 17.38 | 17.71 | 18.34 | 16.95 | 0.34 |
| 476.8914 | 46.52  | 14.49 | 12.04 | 13.49 | 12.87 | 0.70 |
| 477.0320 | 86.72  | 13.49 | 17.44 | 18.30 | 16.18 | 1.50 |
| 477.0667 | 64.51  | 18.77 | 19.31 | 19.75 | 19.03 | 0.60 |
| 477.1614 | 68.56  | 14.81 | 15.12 | 13.19 | 15.60 | 0.13 |
| 477.2288 | 29.9   | 14.46 | 18.07 | 16.55 | 17.33 | 1.59 |
| 477.3169 | 26.08  | 14.70 | 15.86 | 14.15 | 15.10 | 0.19 |
| 477.7490 | 43.86  | 16.62 | 19.00 | 19.19 | 18.62 | 1.64 |
| 477.8806 | 86.72  | 14.96 | 17.51 | 17.17 | 16.93 | 1.14 |
| 478.0310 | 84.64  | 12.39 | 16.80 | 17.65 | 15.94 | 1.58 |
| 478.0733 | 63.33  | 14.46 | 12.96 | 14.43 | 12.58 | 0.36 |
| 478.1075 | 185    | 12.20 | 13.60 | 12.26 | 14.64 | 0.32 |
| 478.2358 | 91.44  | 10.88 | 16.00 | 15.03 | 15.21 | 1.29 |
| 478.2927 | 27.91  | 19.50 | 19.26 | 19.19 | 18.91 | 0.47 |
| 478.3291 | 36.17  | 20.74 | 22.18 | 21.62 | 21.81 | 1.44 |

|          |        |       |       |       |       |      |
|----------|--------|-------|-------|-------|-------|------|
| 478.3419 | 35.3   | 15.20 | 13.32 | 13.67 | 14.37 | 0.38 |
| 478.4870 | 97.22  | 9.02  | 15.22 | 14.88 | 14.32 | 1.60 |
| 478.6144 | 47.85  | 19.47 | 19.91 | 19.87 | 19.21 | 0.31 |
| 478.7453 | 264.38 | 14.92 | 17.56 | 19.77 | 17.27 | 1.16 |
| 478.7797 | 45.98  | 14.58 | 13.50 | 14.46 | 13.98 | 0.27 |
| 478.7965 | 49.39  | 14.81 | 16.69 | 17.51 | 16.33 | 1.07 |
| 478.8356 | 38.27  | 17.88 | 18.44 | 18.79 | 18.79 | 0.70 |
| 478.8822 | 45.75  | 14.99 | 16.30 | 17.24 | 16.44 | 1.05 |
| 478.8996 | 274.71 | 14.01 | 15.34 | 15.43 | 15.00 | 0.84 |
| 478.9121 | 274.13 | 16.38 | 18.22 | 20.40 | 18.10 | 1.16 |
| 479.0214 | 43.08  | 15.10 | 15.88 | 15.76 | 16.65 | 0.68 |
| 479.0475 | 90.47  | 15.19 | 14.03 | 14.57 | 13.87 | 0.35 |
| 479.0626 | 59.85  | 13.82 | 13.34 | 14.29 | 13.86 | 0.02 |
| 479.0790 | 272.26 | 14.68 | 18.03 | 19.98 | 18.28 | 1.35 |
| 479.1113 | 188.51 | 10.43 | 16.13 | 15.09 | 15.04 | 1.39 |
| 479.1325 | 79.51  | 16.10 | 17.27 | 15.83 | 16.06 | 0.33 |
| 479.2464 | 266.2  | 16.23 | 17.01 | 18.98 | 16.72 | 0.79 |
| 479.2960 | 31.58  | 17.20 | 16.33 | 16.43 | 16.46 | 0.45 |
| 479.3321 | 30.77  | 18.95 | 20.04 | 19.35 | 19.61 | 1.00 |
| 479.3591 | 27     | 16.46 | 18.64 | 18.73 | 17.95 | 1.16 |
| 479.4134 | 257.48 | 13.19 | 15.71 | 17.35 | 15.20 | 0.98 |
| 479.5805 | 257.17 | 14.30 | 13.91 | 15.61 | 14.68 | 0.20 |
| 479.7464 | 45.74  | 13.04 | 18.42 | 18.58 | 17.76 | 1.80 |
| 479.8326 | 50.17  | 17.00 | 17.87 | 18.20 | 17.69 | 0.86 |
| 479.9529 | 52.06  | 21.89 | 23.15 | 23.31 | 22.23 | 0.93 |
| 480.1138 | 62.78  | 14.28 | 15.53 | 15.34 | 15.01 | 0.62 |
| 480.3084 | 26.77  | 20.47 | 20.08 | 19.92 | 19.40 | 0.59 |
| 480.3447 | 26.85  | 20.20 | 20.06 | 19.85 | 19.65 | 0.29 |
| 480.4044 | 22.69  | 16.47 | 11.37 | 12.51 | 13.21 | 1.58 |
| 480.6119 | 48.33  | 19.39 | 19.79 | 19.73 | 19.09 | 0.26 |
| 480.7010 | 46.82  | 18.18 | 19.86 | 19.90 | 19.41 | 1.29 |
| 480.7934 | 44.19  | 16.25 | 13.86 | 13.79 | 14.40 | 0.99 |
| 480.8216 | 50.17  | 18.85 | 17.74 | 17.82 | 16.76 | 0.57 |
| 480.8467 | 28.56  | 17.21 | 17.05 | 17.70 | 17.59 | 0.13 |
| 480.8850 | 48.82  | 13.98 | 13.62 | 15.00 | 14.50 | 0.14 |
| 480.9184 | 41.29  | 10.89 | 15.01 | 12.73 | 13.01 | 0.97 |
| 480.9580 | 143.24 | 11.59 | 14.75 | 16.05 | 14.68 | 1.34 |
| 481.0824 | 66.48  | 17.27 | 17.63 | 16.83 | 16.54 | 0.08 |
| 481.0964 | 195.91 | 11.66 | 13.87 | 15.30 | 12.43 | 0.91 |
| 481.2249 | 29.78  | 14.80 | 13.54 | 17.81 | 17.22 | 0.35 |
| 481.3117 | 27.22  | 18.30 | 17.56 | 17.57 | 17.38 | 0.82 |
| 481.3483 | 27.21  | 18.19 | 17.73 | 17.52 | 17.37 | 0.57 |
| 481.6900 | 47.02  | 15.79 | 8.05  | 8.57  | 9.69  | 1.85 |
| 481.7269 | 30.05  | 14.36 | 11.84 | 16.20 | 15.38 | 0.14 |
| 481.7441 | 49.6   | 14.65 | 16.52 | 16.67 | 15.92 | 1.34 |
| 481.7881 | 46.3   | 16.51 | 12.07 | 11.77 | 12.73 | 1.51 |
| 481.8258 | 50.5   | 15.32 | 12.96 | 12.98 | 12.75 | 0.89 |
| 481.8370 | 35.77  | 14.83 | 17.76 | 18.06 | 17.11 | 1.66 |
| 481.9483 | 51.52  | 19.43 | 20.53 | 20.79 | 19.73 | 0.96 |
| 482.1021 | 240.04 | 14.22 | 15.19 | 15.40 | 13.80 | 0.44 |
| 482.1073 | 84.16  | 16.32 | 14.54 | 13.93 | 14.85 | 0.65 |
| 482.1984 | 153.68 | 17.50 | 19.29 | 18.79 | 18.75 | 1.31 |
| 482.1984 | 283.2  | 11.88 | 13.35 | 13.33 | 12.10 | 0.48 |
| 482.2327 | 30.24  | 13.05 | 12.71 | 15.30 | 14.78 | 0.34 |
| 482.3240 | 26.16  | 20.83 | 20.43 | 20.28 | 19.88 | 0.64 |
| 482.3605 | 27.89  | 20.14 | 20.15 | 19.94 | 19.68 | 0.13 |

|          |        |       |       |       |       |      |
|----------|--------|-------|-------|-------|-------|------|
| 482.4201 | 22.63  | 16.51 | 10.26 | 11.92 | 12.76 | 1.53 |
| 482.5220 | 54.4   | 15.62 | 17.50 | 16.99 | 16.49 | 1.15 |
| 482.5582 | 45.07  | 19.63 | 16.71 | 16.47 | 16.52 | 1.22 |
| 482.6093 | 48.52  | 18.47 | 18.77 | 18.70 | 18.16 | 0.19 |
| 482.6984 | 46.88  | 18.98 | 20.44 | 20.45 | 20.00 | 1.47 |
| 482.7429 | 42.24  | 15.80 | 17.26 | 17.24 | 16.12 | 0.67 |
| 482.8187 | 49.85  | 18.59 | 17.69 | 17.79 | 16.51 | 0.49 |
| 482.9341 | 41.11  | 12.46 | 17.97 | 18.71 | 15.85 | 1.73 |
| 482.9528 | 51.85  | 12.07 | 13.83 | 13.42 | 12.46 | 0.39 |
| 483.0762 | 41.62  | 14.98 | 14.32 | 13.18 | 14.73 | 0.39 |
| 483.0901 | 69.39  | 15.46 | 13.58 | 16.71 | 14.36 | 0.23 |
| 483.2013 | 149.81 | 14.43 | 16.13 | 15.24 | 15.66 | 0.97 |
| 483.3275 | 27.25  | 18.58 | 18.17 | 17.99 | 17.86 | 0.84 |
| 483.3638 | 27.74  | 18.19 | 17.77 | 17.59 | 17.35 | 0.47 |
| 483.5191 | 72.22  | 14.73 | 15.02 | 14.21 | 14.41 | 0.05 |
| 483.6873 | 47.88  | 17.08 | 11.35 | 11.63 | 12.97 | 1.74 |
| 483.8322 | 38.78  | 14.25 | 15.61 | 15.72 | 15.39 | 1.00 |
| 483.9459 | 52.56  | 15.04 | 15.64 | 15.25 | 14.54 | 0.16 |
| 483.9941 | 244.38 | 15.13 | 15.52 | 13.70 | 14.70 | 0.13 |
| 484.0826 | 85.74  | 14.10 | 17.07 | 15.72 | 16.15 | 1.21 |
| 484.1167 | 237.28 | 21.28 | 24.63 | 24.79 | 23.75 | 1.42 |
| 484.1428 | 90.68  | 14.52 | 15.42 | 14.52 | 15.01 | 0.22 |
| 484.2768 | 61.58  | 16.96 | 19.40 | 19.04 | 18.29 | 1.52 |
| 484.5559 | 44.97  | 20.88 | 18.40 | 18.16 | 18.04 | 1.21 |
| 484.6076 | 46.82  | 15.43 | 16.41 | 15.95 | 15.74 | 0.40 |
| 484.6949 | 46.8   | 18.25 | 19.66 | 19.68 | 19.23 | 1.45 |
| 484.7406 | 45.84  | 14.90 | 17.43 | 17.82 | 16.74 | 1.36 |
| 484.7836 | 47.76  | 18.05 | 19.40 | 19.49 | 19.44 | 1.39 |
| 484.8159 | 50.02  | 16.71 | 14.40 | 14.44 | 13.30 | 0.75 |
| 484.8634 | 123.3  | 11.01 | 13.15 | 9.89  | 12.96 | 0.27 |
| 484.9052 | 53.4   | 19.32 | 18.66 | 19.50 | 17.95 | 0.29 |
| 484.9373 | 113.85 | 10.82 | 13.90 | 10.95 | 12.49 | 0.62 |
| 484.9780 | 281.88 | 16.45 | 18.89 | 18.99 | 18.36 | 1.01 |
| 484.9976 | 143.85 | 9.92  | 13.22 | 11.87 | 11.77 | 0.78 |
| 485.0147 | 257.13 | 17.27 | 17.51 | 17.59 | 17.10 | 0.20 |
| 485.0442 | 72.77  | 17.08 | 10.01 | 13.22 | 12.77 | 1.36 |
| 485.0714 | 65.14  | 14.28 | 16.74 | 16.89 | 16.54 | 1.17 |
| 485.1205 | 236.56 | 18.40 | 21.52 | 22.19 | 20.80 | 1.37 |
| 485.1206 | 125.61 | 14.03 | 15.92 | 15.43 | 16.77 | 0.79 |
| 485.2809 | 54.94  | 15.76 | 16.75 | 16.27 | 15.57 | 0.41 |
| 485.6843 | 47.68  | 16.18 | 10.25 | 10.93 | 11.71 | 1.84 |
| 485.7835 | 49.01  | 14.90 | 17.94 | 18.11 | 17.20 | 1.75 |
| 485.9609 | 64.81  | 15.50 | 15.44 | 14.26 | 13.35 | 0.35 |
| 485.9824 | 182.08 | 12.46 | 14.69 | 15.31 | 13.66 | 0.67 |
| 486.0128 | 57.25  | 17.97 | 16.63 | 17.28 | 16.00 | 0.53 |
| 486.0633 | 168.68 | 7.67  | 13.31 | 12.65 | 8.91  | 1.32 |
| 486.0867 | 89.08  | 14.25 | 15.67 | 14.52 | 15.87 | 0.52 |
| 486.1126 | 233.56 | 17.11 | 20.85 | 21.20 | 19.94 | 1.50 |
| 486.2924 | 27.43  | 14.81 | 17.65 | 15.20 | 16.49 | 0.81 |
| 486.5531 | 44.97  | 20.83 | 18.42 | 18.27 | 17.75 | 0.98 |
| 486.6475 | 46.9   | 18.36 | 19.40 | 19.34 | 18.76 | 0.96 |
| 486.6937 | 47.07  | 15.96 | 17.69 | 17.61 | 17.21 | 1.20 |
| 486.7378 | 45.85  | 12.81 | 15.01 | 15.59 | 13.84 | 0.84 |
| 486.7809 | 47.15  | 17.39 | 19.31 | 19.68 | 19.33 | 1.66 |
| 486.8282 | 47.28  | 13.42 | 15.05 | 15.86 | 15.07 | 0.90 |
| 486.8835 | 20.77  | 15.52 | 17.17 | 17.45 | 16.54 | 1.30 |

|          |        |       |       |       |       |      |
|----------|--------|-------|-------|-------|-------|------|
| 486.9038 | 51.89  | 16.98 | 15.95 | 16.09 | 14.62 | 0.58 |
| 486.9198 | 44.71  | 14.05 | 12.77 | 14.31 | 13.91 | 0.21 |
| 486.9586 | 73.74  | 14.24 | 15.96 | 14.76 | 14.35 | 0.59 |
| 487.0262 | 59.04  | 16.75 | 15.50 | 16.80 | 17.31 | 0.33 |
| 487.0646 | 256.76 | 10.47 | 14.18 | 10.53 | 11.00 | 0.48 |
| 487.0897 | 88.95  | 14.17 | 15.72 | 12.97 | 14.94 | 0.16 |
| 487.1001 | 87.48  | 15.26 | 18.28 | 17.88 | 17.15 | 1.77 |
| 487.1160 | 236.22 | 13.59 | 18.09 | 18.39 | 16.98 | 1.52 |
| 487.1658 | 139.27 | 8.82  | 12.66 | 13.10 | 11.20 | 0.94 |
| 487.1989 | 77.55  | 15.15 | 14.89 | 15.71 | 15.02 | 0.03 |
| 487.2135 | 189.1  | 15.44 | 18.07 | 16.30 | 17.41 | 0.99 |
| 487.7774 | 49.81  | 15.02 | 18.41 | 18.60 | 17.86 | 1.68 |
| 488.0749 | 231.58 | 7.95  | 15.26 | 16.05 | 13.91 | 1.85 |
| 488.2009 | 99.36  | 15.88 | 15.17 | 15.62 | 14.99 | 0.34 |
| 488.2387 | 34.52  | 15.70 | 17.18 | 16.69 | 16.50 | 0.88 |
| 488.5507 | 45.02  | 20.25 | 17.42 | 17.45 | 17.21 | 1.13 |
| 488.6432 | 46.29  | 19.08 | 20.34 | 20.30 | 19.73 | 1.16 |
| 488.7477 | 20.61  | 12.88 | 15.44 | 13.20 | 11.73 | 0.33 |
| 488.7816 | 48.17  | 15.92 | 17.63 | 17.93 | 17.79 | 1.58 |
| 488.8263 | 46.9   | 13.89 | 14.58 | 14.96 | 14.46 | 0.49 |
| 488.8726 | 50.83  | 15.70 | 16.60 | 16.59 | 17.03 | 0.49 |
| 488.9174 | 40.56  | 14.25 | 14.85 | 14.55 | 15.51 | 0.30 |
| 488.9594 | 50.4   | 13.60 | 13.57 | 15.35 | 14.29 | 0.37 |
| 489.0891 | 145.46 | 13.88 | 16.26 | 15.38 | 14.53 | 1.00 |
| 489.1145 | 272.95 | 21.11 | 23.66 | 22.87 | 22.08 | 1.29 |
| 489.5985 | 256.13 | 11.53 | 14.28 | 15.72 | 12.90 | 0.93 |
| 489.6158 | 63.63  | 12.74 | 14.96 | 15.97 | 13.82 | 0.96 |
| 489.7758 | 49.68  | 14.33 | 17.36 | 17.51 | 16.66 | 1.85 |
| 489.8603 | 39.18  | 18.22 | 18.04 | 18.50 | 17.98 | 0.02 |
| 489.9190 | 52.67  | 18.79 | 14.89 | 16.33 | 14.63 | 1.10 |
| 489.9510 | 58.05  | 14.10 | 14.38 | 15.32 | 14.41 | 0.30 |
| 490.0502 | 271.62 | 14.05 | 15.28 | 16.51 | 15.39 | 1.06 |
| 490.0736 | 228.83 | 12.23 | 20.61 | 19.52 | 18.42 | 1.68 |
| 490.0847 | 100.75 | 15.11 | 13.67 | 13.74 | 13.85 | 0.92 |
| 490.1063 | 83.47  | 13.13 | 15.45 | 14.02 | 14.90 | 0.91 |
| 490.1182 | 267.38 | 17.55 | 20.72 | 19.96 | 18.99 | 1.30 |
| 490.3526 | 23.1   | 16.70 | 16.36 | 16.11 | 16.25 | 0.31 |
| 490.4253 | 22.4   | 16.07 | 10.08 | 10.81 | 11.33 | 1.61 |
| 490.5482 | 45.04  | 18.92 | 15.28 | 15.04 | 15.35 | 1.21 |
| 490.6408 | 46.43  | 18.69 | 19.97 | 19.93 | 19.34 | 1.18 |
| 490.6888 | 46.44  | 14.40 | 13.76 | 15.24 | 13.24 | 0.08 |
| 490.7295 | 46.82  | 17.90 | 19.79 | 19.85 | 19.49 | 1.65 |
| 490.8233 | 43.06  | 15.98 | 15.64 | 14.91 | 15.41 | 0.47 |
| 490.8528 | 40.18  | 17.66 | 19.16 | 19.34 | 18.61 | 1.16 |
| 490.9955 | 198.82 | 11.96 | 13.29 | 14.16 | 13.94 | 0.62 |
| 491.0377 | 55.99  | 17.03 | 14.11 | 14.68 | 16.22 | 1.04 |
| 491.0762 | 190.39 | 7.40  | 16.59 | 15.43 | 13.48 | 1.77 |
| 491.0876 | 98.04  | 18.57 | 18.61 | 18.88 | 18.08 | 0.05 |
| 491.1193 | 259.55 | 15.27 | 17.50 | 15.78 | 15.16 | 0.64 |
| 491.3558 | 22.8   | 13.95 | 12.40 | 12.59 | 12.76 | 0.63 |
| 491.7270 | 49.1   | 15.64 | 17.98 | 18.21 | 17.19 | 1.35 |
| 491.8248 | 46.92  | 15.32 | 14.00 | 13.95 | 14.40 | 0.81 |
| 491.8598 | 50.72  | 15.26 | 17.14 | 17.36 | 16.92 | 1.12 |
| 491.8877 | 49.85  | 13.82 | 13.01 | 15.06 | 13.59 | 0.02 |
| 492.0111 | 246.97 | 14.86 | 14.29 | 13.30 | 14.34 | 0.40 |
| 492.1075 | 67.11  | 11.99 | 16.66 | 15.71 | 15.69 | 1.29 |

|          |        |       |       |       |       |      |
|----------|--------|-------|-------|-------|-------|------|
| 492.2463 | 44.17  | 16.30 | 17.49 | 17.24 | 16.55 | 0.71 |
| 492.3076 | 34.82  | 17.85 | 16.13 | 17.00 | 17.20 | 0.71 |
| 492.5449 | 45.1   | 17.32 | 10.92 | 10.94 | 11.40 | 1.57 |
| 492.5910 | 45.85  | 19.57 | 18.55 | 18.21 | 17.90 | 0.75 |
| 492.6381 | 46.5   | 17.42 | 18.62 | 18.52 | 18.02 | 1.20 |
| 492.6864 | 46.27  | 14.32 | 13.14 | 14.16 | 12.96 | 0.40 |
| 492.7272 | 46.78  | 18.27 | 20.16 | 20.31 | 19.84 | 1.71 |
| 492.7718 | 45.86  | 14.48 | 17.57 | 18.06 | 16.73 | 1.37 |
| 492.8176 | 47.71  | 16.16 | 16.11 | 15.79 | 16.07 | 0.13 |
| 492.8534 | 40.48  | 18.52 | 19.45 | 19.67 | 19.07 | 1.06 |
| 493.0423 | 64.43  | 18.41 | 18.76 | 19.09 | 18.22 | 0.30 |
| 493.0915 | 63.94  | 17.19 | 18.60 | 18.38 | 17.96 | 0.90 |
| 493.1208 | 85.22  | 14.97 | 16.05 | 15.61 | 14.95 | 0.41 |
| 493.5135 | 54.21  | 15.89 | 18.08 | 17.55 | 17.07 | 1.14 |
| 493.7240 | 49.33  | 16.13 | 18.76 | 19.05 | 18.39 | 1.56 |
| 493.8588 | 51     | 12.64 | 13.47 | 13.09 | 13.99 | 0.40 |
| 493.8827 | 44.57  | 14.06 | 14.02 | 14.91 | 15.13 | 0.30 |
| 494.0143 | 62.02  | 12.28 | 14.42 | 12.84 | 12.95 | 0.56 |
| 494.2892 | 27.67  | 9.32  | 18.09 | 16.04 | 15.80 | 1.56 |
| 494.3241 | 28.59  | 23.45 | 22.98 | 22.92 | 22.72 | 0.65 |
| 494.5895 | 45.98  | 20.64 | 19.90 | 19.66 | 19.33 | 0.64 |
| 494.7244 | 46.6   | 16.82 | 19.19 | 19.40 | 18.70 | 1.61 |
| 494.7686 | 45.32  | 15.00 | 16.91 | 17.61 | 16.36 | 1.33 |
| 494.8129 | 46.83  | 17.37 | 18.97 | 19.02 | 19.05 | 1.37 |
| 494.8606 | 37.34  | 18.16 | 18.10 | 18.42 | 17.82 | 0.03 |
| 494.9224 | 269.18 | 16.15 | 17.58 | 20.10 | 18.00 | 1.03 |
| 494.9376 | 271.25 | 16.44 | 16.06 | 16.24 | 16.53 | 0.10 |
| 494.9974 | 40.23  | 13.40 | 15.78 | 15.19 | 15.37 | 1.32 |
| 495.0419 | 62.46  | 14.26 | 13.81 | 14.16 | 13.34 | 0.13 |
| 495.0672 | 121.02 | 12.44 | 15.15 | 10.19 | 12.68 | 0.16 |
| 495.0894 | 265.95 | 16.76 | 18.98 | 21.00 | 19.46 | 1.32 |
| 495.1099 | 60.77  | 14.31 | 12.97 | 12.93 | 13.59 | 0.64 |
| 495.1234 | 160.96 | 10.37 | 16.81 | 10.76 | 14.41 | 0.97 |
| 495.1355 | 81.71  | 14.29 | 16.91 | 14.95 | 16.69 | 0.78 |
| 495.1482 | 80.11  | 15.16 | 17.26 | 15.21 | 16.32 | 0.60 |
| 495.1602 | 184.64 | 13.59 | 13.00 | 12.86 | 12.84 | 0.45 |
| 495.1797 | 98.32  | 14.39 | 16.10 | 15.93 | 15.38 | 1.21 |
| 495.2564 | 266.27 | 16.75 | 18.32 | 20.64 | 18.85 | 1.14 |
| 495.3274 | 28.06  | 21.53 | 20.88 | 20.84 | 20.60 | 0.83 |
| 495.4236 | 268.72 | 15.25 | 17.37 | 19.70 | 17.58 | 1.16 |
| 495.5904 | 260.33 | 15.90 | 16.37 | 18.40 | 16.45 | 0.63 |
| 495.7212 | 49.22  | 14.94 | 18.21 | 18.51 | 17.26 | 1.35 |
| 495.7576 | 252.13 | 15.33 | 13.77 | 16.76 | 14.51 | 0.17 |
| 495.8105 | 50.15  | 16.53 | 18.28 | 18.51 | 17.98 | 1.66 |
| 495.9270 | 53.48  | 21.08 | 21.28 | 22.00 | 20.65 | 0.32 |
| 495.9994 | 57.36  | 16.70 | 14.32 | 12.42 | 13.58 | 0.98 |
| 496.1206 | 73.54  | 12.01 | 12.28 | 13.81 | 14.28 | 0.27 |
| 496.1567 | 184.63 | 14.35 | 15.38 | 14.92 | 14.67 | 0.58 |
| 496.1831 | 98.19  | 17.86 | 19.84 | 19.91 | 18.88 | 1.37 |
| 496.3395 | 27.77  | 27.02 | 26.95 | 26.71 | 26.46 | 0.27 |
| 496.5864 | 46.05  | 20.56 | 19.82 | 19.54 | 19.10 | 0.66 |
| 496.6765 | 46.68  | 18.24 | 19.77 | 19.75 | 19.23 | 1.42 |
| 496.7227 | 46.55  | 14.32 | 16.10 | 17.11 | 16.47 | 1.17 |
| 496.7664 | 43.76  | 12.78 | 12.15 | 14.08 | 11.97 | 0.02 |
| 496.7948 | 49.58  | 17.88 | 12.65 | 12.61 | 12.67 | 1.39 |
| 496.8133 | 48.82  | 15.58 | 18.09 | 18.17 | 18.10 | 1.55 |

|          |        |       |       |       |       |      |
|----------|--------|-------|-------|-------|-------|------|
| 496.8597 | 46.31  | 15.99 | 15.03 | 16.03 | 15.40 | 0.33 |
| 496.9078 | 23.87  | 13.56 | 12.93 | 14.20 | 13.16 | 0.08 |
| 496.9298 | 52.75  | 17.04 | 16.59 | 17.19 | 15.38 | 0.19 |
| 496.9706 | 85.71  | 15.02 | 18.55 | 18.31 | 17.64 | 1.53 |
| 496.9836 | 53.99  | 14.97 | 16.75 | 15.02 | 14.53 | 0.31 |
| 497.0487 | 56.57  | 15.15 | 11.62 | 16.20 | 13.34 | 0.50 |
| 497.1054 | 68.31  | 16.10 | 16.89 | 17.95 | 16.95 | 0.90 |
| 497.1970 | 27.73  | 15.15 | 18.87 | 18.04 | 18.27 | 1.83 |
| 497.2358 | 30.73  | 16.05 | 16.27 | 15.32 | 17.67 | 0.03 |
| 497.3429 | 27.12  | 24.89 | 25.10 | 24.80 | 24.40 | 0.01 |
| 497.7176 | 49.09  | 14.49 | 16.58 | 16.71 | 15.65 | 1.12 |
| 497.8075 | 50     | 15.33 | 18.29 | 18.57 | 17.74 | 1.91 |
| 497.9238 | 51.66  | 19.15 | 18.96 | 19.81 | 18.23 | 0.02 |
| 498.0000 | 305.73 | 15.12 | 19.15 | 17.70 | 16.36 | 1.44 |
| 498.0020 | 85.39  | 10.90 | 15.14 | 15.88 | 14.56 | 1.51 |
| 498.0183 | 87.19  | 11.13 | 18.53 | 17.85 | 16.84 | 1.79 |
| 498.0619 | 271.56 | 15.57 | 16.26 | 16.59 | 14.96 | 0.36 |
| 498.1017 | 92.22  | 12.12 | 13.18 | 12.70 | 11.30 | 0.24 |
| 498.1242 | 66.89  | 14.03 | 13.43 | 11.98 | 12.93 | 0.60 |
| 498.2681 | 91.35  | 9.89  | 17.86 | 17.00 | 16.56 | 1.68 |
| 498.3458 | 27.38  | 22.21 | 22.35 | 22.17 | 21.51 | 0.05 |
| 498.5193 | 90.82  | 10.36 | 17.45 | 16.40 | 15.83 | 1.84 |
| 498.5832 | 45.9   | 19.74 | 18.74 | 18.64 | 18.29 | 0.75 |
| 498.6731 | 46.75  | 18.95 | 20.47 | 20.42 | 19.98 | 1.42 |
| 498.7737 | 66.68  | 11.53 | 9.85  | 15.55 | 13.57 | 0.30 |
| 498.7927 | 49.9   | 18.09 | 12.52 | 13.15 | 13.63 | 1.52 |
| 498.8101 | 50.89  | 12.44 | 13.27 | 14.70 | 14.75 | 0.63 |
| 498.9026 | 36.33  | 17.59 | 15.30 | 15.25 | 15.88 | 0.97 |
| 498.9292 | 42.32  | 14.24 | 15.75 | 17.89 | 14.57 | 0.90 |
| 499.0533 | 60.43  | 16.85 | 16.38 | 17.13 | 15.86 | 0.16 |
| 499.3215 | 26.58  | 16.73 | 19.12 | 16.12 | 16.01 | 0.59 |
| 499.3483 | 27.26  | 18.99 | 19.04 | 18.91 | 18.40 | 0.09 |
| 499.8037 | 49.33  | 15.03 | 16.81 | 16.87 | 16.17 | 1.57 |
| 499.8979 | 45.37  | 17.79 | 17.89 | 18.12 | 17.91 | 0.17 |
| 499.9235 | 49.86  | 14.83 | 13.02 | 14.16 | 12.31 | 0.56 |
| 499.9729 | 84.7   | 15.70 | 19.56 | 18.91 | 18.17 | 1.59 |
| 499.9891 | 267.21 | 16.53 | 19.05 | 18.27 | 17.59 | 1.27 |
| 500.0455 | 303.77 | 14.30 | 14.51 | 14.06 | 14.02 | 0.01 |
| 500.0810 | 282.76 | 10.98 | 16.78 | 18.04 | 15.88 | 1.62 |
| 500.0941 | 270.67 | 15.54 | 17.15 | 18.18 | 16.74 | 1.13 |
| 500.2609 | 273.09 | 14.11 | 18.00 | 19.04 | 17.41 | 1.43 |
| 500.2771 | 33.8   | 15.82 | 15.13 | 15.46 | 13.29 | 0.25 |
| 500.2916 | 31.52  | 11.89 | 16.63 | 8.71  | 10.34 | 0.21 |
| 500.4285 | 271.88 | 16.41 | 17.78 | 18.77 | 17.51 | 1.05 |
| 500.5804 | 45.91  | 17.92 | 16.94 | 16.38 | 16.16 | 0.67 |
| 500.5811 | 217.11 | 9.08  | 15.84 | 16.94 | 13.94 | 1.59 |
| 500.5954 | 269.65 | 15.70 | 17.02 | 17.94 | 16.45 | 0.99 |
| 500.6705 | 46.54  | 18.35 | 19.73 | 19.69 | 19.30 | 1.36 |
| 500.7201 | 46.78  | 14.27 | 15.14 | 16.12 | 14.68 | 0.66 |
| 500.7590 | 47.03  | 17.25 | 19.40 | 19.55 | 19.27 | 1.72 |
| 500.7625 | 267.15 | 12.98 | 15.92 | 16.61 | 15.27 | 1.24 |
| 500.7846 | 49.03  | 16.28 | 15.86 | 14.85 | 16.75 | 0.38 |
| 500.8434 | 21.09  | 13.88 | 11.92 | 12.92 | 12.72 | 0.89 |
| 500.8837 | 50.89  | 18.24 | 18.24 | 18.72 | 17.82 | 0.10 |
| 500.9033 | 20.37  | 13.04 | 13.69 | 14.05 | 13.20 | 0.36 |
| 500.9277 | 44.25  | 9.63  | 9.51  | 13.04 | 10.13 | 0.42 |



|          |        |       |       |       |       |      |
|----------|--------|-------|-------|-------|-------|------|
| 500.9440 | 87.46  | 15.29 | 17.54 | 15.65 | 16.46 | 0.82 |
| 500.9688 | 92.39  | 11.47 | 18.75 | 18.32 | 16.38 | 1.81 |
| 501.0663 | 57.91  | 18.77 | 19.97 | 19.72 | 20.39 | 0.53 |
| 501.2973 | 33.9   | 12.41 | 17.51 | 14.68 | 15.52 | 1.14 |
| 501.7555 | 49.38  | 16.30 | 17.61 | 17.75 | 16.88 | 0.96 |
| 501.8898 | 51.65  | 15.20 | 15.84 | 16.98 | 15.96 | 0.44 |
| 501.9700 | 87.9   | 13.37 | 16.55 | 14.27 | 14.70 | 0.86 |
| 501.9902 | 59.13  | 17.39 | 15.01 | 16.97 | 15.44 | 0.64 |
| 502.0181 | 284.91 | 15.55 | 15.23 | 15.71 | 13.67 | 0.16 |
| 502.0687 | 56.04  | 16.04 | 15.19 | 14.03 | 16.26 | 0.44 |
| 502.1070 | 58.35  | 12.91 | 13.95 | 15.19 | 13.56 | 0.55 |
| 502.2926 | 27.22  | 20.70 | 20.24 | 20.31 | 19.56 | 0.58 |
| 502.3287 | 27.91  | 17.28 | 17.67 | 17.15 | 17.67 | 0.18 |
| 502.6208 | 49.32  | 19.76 | 19.64 | 19.53 | 19.18 | 0.19 |
| 502.6640 | 147.45 | 8.91  | 14.03 | 12.93 | 13.37 | 1.73 |
| 502.6671 | 46.66  | 15.02 | 17.87 | 17.85 | 17.34 | 1.69 |
| 502.7561 | 46.65  | 17.00 | 19.47 | 19.73 | 19.32 | 1.78 |
| 502.7961 | 44.03  | 15.03 | 18.03 | 18.27 | 17.78 | 1.51 |
| 502.8055 | 42.88  | 14.56 | 13.84 | 15.30 | 13.72 | 0.09 |
| 502.8645 | 145.82 | 9.59  | 13.74 | 12.84 | 13.66 | 1.25 |
| 502.8884 | 52.62  | 17.32 | 18.37 | 18.65 | 18.10 | 0.99 |
| 502.9908 | 85.12  | 15.45 | 17.28 | 16.77 | 16.27 | 1.04 |
| 503.2277 | 146.49 | 12.75 | 13.88 | 12.51 | 13.08 | 0.25 |
| 503.2959 | 27.05  | 18.65 | 18.29 | 18.29 | 17.56 | 0.48 |
| 503.7533 | 49.89  | 14.17 | 18.08 | 18.32 | 17.13 | 1.69 |
| 504.0699 | 79.22  | 13.96 | 14.36 | 14.57 | 14.87 | 0.33 |
| 504.3061 | 40.44  | 16.34 | 13.04 | 14.46 | 12.72 | 0.69 |
| 504.3448 | 28.05  | 17.20 | 17.94 | 17.39 | 17.70 | 0.64 |
| 504.5037 | 53.88  | 16.11 | 18.01 | 17.34 | 16.73 | 0.93 |
| 504.6172 | 45.58  | 20.42 | 20.60 | 20.34 | 20.02 | 0.00 |
| 504.7556 | 46.3   | 15.13 | 18.04 | 18.45 | 18.10 | 1.79 |
| 504.7964 | 47.37  | 14.77 | 17.06 | 17.41 | 17.35 | 1.42 |
| 504.8428 | 47.61  | 16.16 | 18.01 | 17.91 | 18.23 | 1.25 |
| 504.8928 | 42.25  | 15.53 | 18.68 | 18.23 | 17.59 | 1.53 |
| 505.0055 | 53.56  | 14.02 | 14.15 | 12.30 | 13.36 | 0.33 |
| 505.0574 | 45.76  | 13.19 | 14.11 | 11.95 | 14.55 | 0.06 |
| 505.0683 | 82.67  | 13.56 | 14.20 | 14.04 | 13.29 | 0.27 |
| 505.0847 | 248.04 | 14.33 | 17.44 | 14.98 | 14.80 | 0.96 |
| 505.5025 | 53.62  | 13.67 | 15.28 | 14.17 | 13.69 | 0.43 |
| 505.6901 | 279.6  | 15.50 | 14.57 | 14.93 | 15.37 | 0.42 |
| 505.7485 | 48.75  | 15.30 | 17.21 | 17.35 | 16.63 | 1.53 |
| 505.8381 | 50.7   | 16.93 | 18.11 | 18.51 | 17.85 | 1.12 |
| 505.9298 | 49.86  | 13.52 | 12.96 | 13.31 | 13.52 | 0.20 |
| 505.9626 | 42.31  | 12.50 | 13.70 | 11.60 | 11.94 | 0.07 |
| 506.2648 | 40.65  | 12.40 | 15.10 | 14.68 | 14.34 | 0.83 |
| 506.2895 | 27.57  | 13.58 | 17.90 | 16.03 | 16.25 | 1.34 |
| 506.3603 | 27.2   | 18.45 | 18.62 | 18.39 | 18.18 | 0.02 |
| 506.5071 | 70.66  | 9.56  | 15.16 | 14.70 | 14.31 | 1.64 |
| 506.6161 | 48.57  | 20.38 | 20.29 | 20.09 | 19.93 | 0.17 |
| 506.7027 | 46.08  | 17.23 | 19.71 | 19.72 | 19.26 | 1.67 |
| 506.7569 | 62.58  | 13.38 | 14.43 | 14.67 | 15.73 | 0.55 |
| 506.7898 | 35.82  | 15.79 | 16.44 | 13.01 | 15.16 | 0.31 |
| 506.8237 | 45.35  | 16.23 | 15.98 | 11.90 | 12.62 | 0.75 |
| 506.8326 | 47.85  | 16.87 | 20.09 | 19.73 | 19.35 | 1.79 |
| 506.8918 | 40.75  | 14.96 | 15.26 | 13.96 | 14.39 | 0.15 |
| 506.9924 | 52.41  | 13.27 | 15.03 | 15.53 | 15.50 | 0.83 |

|          |        |       |       |       |       |      |
|----------|--------|-------|-------|-------|-------|------|
| 507.0083 | 65.98  | 13.44 | 13.02 | 13.21 | 14.24 | 0.06 |
| 507.0767 | 87.1   | 12.79 | 13.50 | 13.64 | 13.23 | 0.30 |
| 507.1250 | 147.37 | 13.94 | 12.77 | 14.94 | 13.60 | 0.12 |
| 507.2688 | 34.9   | 13.21 | 14.35 | 12.61 | 15.23 | 0.19 |
| 507.2972 | 27.54  | 13.93 | 18.09 | 15.70 | 17.12 | 1.28 |
| 507.3221 | 27.48  | 14.45 | 17.38 | 17.89 | 13.53 | 1.00 |
| 507.5860 | 250.97 | 10.23 | 15.38 | 15.60 | 13.24 | 1.42 |
| 507.7008 | 48.93  | 15.54 | 16.92 | 17.21 | 15.96 | 0.69 |
| 507.7986 | 46.17  | 15.81 | 16.54 | 13.63 | 15.85 | 0.18 |
| 507.8364 | 50.56  | 14.37 | 18.02 | 18.26 | 17.26 | 1.71 |
| 507.9996 | 58.37  | 17.62 | 15.71 | 14.85 | 13.75 | 0.86 |
| 508.0876 | 255.72 | 14.33 | 13.58 | 12.86 | 12.87 | 0.52 |
| 508.1394 | 71.99  | 14.99 | 15.42 | 15.62 | 13.38 | 0.10 |
| 508.3046 | 27.14  | 15.23 | 18.53 | 16.92 | 17.49 | 1.41 |
| 508.3394 | 27.68  | 17.35 | 14.55 | 16.00 | 15.89 | 1.00 |
| 508.3761 | 27.74  | 18.19 | 18.41 | 18.37 | 17.97 | 0.08 |
| 508.5687 | 46.72  | 16.52 | 15.64 | 15.27 | 14.45 | 0.66 |
| 508.6147 | 47.65  | 19.35 | 19.06 | 18.80 | 18.73 | 0.40 |
| 508.6998 | 46.03  | 17.57 | 20.05 | 20.05 | 19.62 | 1.78 |
| 508.7948 | 47.16  | 16.22 | 14.79 | 14.12 | 14.24 | 1.00 |
| 508.8072 | 29.14  | 14.03 | 16.09 | 12.56 | 14.09 | 0.18 |
| 508.8278 | 48.16  | 16.36 | 19.57 | 19.73 | 19.01 | 1.71 |
| 509.0152 | 61.2   | 16.18 | 15.93 | 17.02 | 16.11 | 0.10 |
| 509.0929 | 87.2   | 17.17 | 17.24 | 18.34 | 16.59 | 0.26 |
| 509.3792 | 27.9   | 15.64 | 13.09 | 13.88 | 14.00 | 0.90 |
| 509.6980 | 48.99  | 16.78 | 17.78 | 18.06 | 17.23 | 0.69 |
| 509.8329 | 49.97  | 13.97 | 15.35 | 15.49 | 14.59 | 0.89 |
| 509.9228 | 53.53  | 19.82 | 18.41 | 17.51 | 17.73 | 1.12 |
| 510.3554 | 26.88  | 20.33 | 20.49 | 20.48 | 20.02 | 0.08 |
| 510.4515 | 22.58  | 16.94 | 12.95 | 13.10 | 14.40 | 1.24 |
| 510.5664 | 46.71  | 18.10 | 17.58 | 17.71 | 16.77 | 0.52 |
| 510.6116 | 46.77  | 17.48 | 16.95 | 15.97 | 16.46 | 0.58 |
| 510.7005 | 46.86  | 16.99 | 19.02 | 19.01 | 18.75 | 1.46 |
| 510.7519 | 48.29  | 14.78 | 15.46 | 16.11 | 15.12 | 0.66 |
| 510.7877 | 46.51  | 16.79 | 18.80 | 19.04 | 18.82 | 1.54 |
| 510.8263 | 50.04  | 15.19 | 18.06 | 18.30 | 17.33 | 1.70 |
| 510.9171 | 53.65  | 18.28 | 18.67 | 18.44 | 18.27 | 0.23 |
| 511.0714 | 147.94 | 13.59 | 13.61 | 12.97 | 12.99 | 0.19 |
| 511.0965 | 255.41 | 15.41 | 17.27 | 14.24 | 15.32 | 0.16 |
| 511.1134 | 76.06  | 17.60 | 14.57 | 12.81 | 14.17 | 1.14 |
| 511.3586 | 27.52  | 18.19 | 18.18 | 18.36 | 18.12 | 0.06 |
| 511.6951 | 49.02  | 16.11 | 17.23 | 17.42 | 15.90 | 0.51 |
| 511.7854 | 49.21  | 15.36 | 17.75 | 18.07 | 17.31 | 1.40 |
| 511.9003 | 51.82  | 19.90 | 18.46 | 19.56 | 17.79 | 0.65 |
| 512.0021 | 83.78  | 14.44 | 16.47 | 15.32 | 14.41 | 0.69 |
| 512.0558 | 189.32 | 8.14  | 12.30 | 12.96 | 12.07 | 1.24 |
| 512.3346 | 28.72  | 16.07 | 14.98 | 14.88 | 14.23 | 0.59 |
| 512.4672 | 22.44  | 15.42 | 8.74  | 10.49 | 10.68 | 1.32 |
| 512.4915 | 53.62  | 14.69 | 15.45 | 15.42 | 13.89 | 0.29 |
| 512.5628 | 46.72  | 18.25 | 17.69 | 17.95 | 17.00 | 0.43 |
| 512.6516 | 46.07  | 19.37 | 20.37 | 20.14 | 19.68 | 0.52 |
| 512.7004 | 47.57  | 15.99 | 16.17 | 15.93 | 16.30 | 0.09 |
| 512.7714 | 276.07 | 14.97 | 16.40 | 15.43 | 14.63 | 0.20 |
| 512.7831 | 46.02  | 16.66 | 18.66 | 18.94 | 18.71 | 1.32 |
| 512.8325 | 45.22  | 13.41 | 16.16 | 13.00 | 12.99 | 0.38 |
| 512.8660 | 25.12  | 10.70 | 16.99 | 9.76  | 15.64 | 0.81 |

|          |        |       |       |       |       |      |
|----------|--------|-------|-------|-------|-------|------|
| 512.9153 | 51.15  | 18.10 | 19.10 | 19.07 | 19.47 | 1.09 |
| 512.9380 | 276.53 | 13.67 | 16.18 | 15.99 | 14.91 | 0.63 |
| 512.9553 | 59.83  | 15.37 | 15.25 | 14.68 | 13.68 | 0.22 |
| 513.0779 | 101.04 | 13.83 | 15.87 | 12.60 | 15.43 | 0.35 |
| 513.1055 | 275.87 | 11.76 | 15.05 | 15.83 | 13.41 | 0.72 |
| 513.2344 | 50.66  | 11.80 | 11.23 | 14.85 | 13.23 | 0.35 |
| 513.2728 | 275.6  | 14.95 | 14.95 | 15.18 | 14.48 | 0.01 |
| 513.6918 | 48.57  | 14.49 | 15.13 | 14.83 | 14.07 | 0.14 |
| 513.7803 | 49.62  | 14.27 | 17.93 | 18.20 | 17.19 | 1.66 |
| 513.8740 | 27.06  | 12.42 | 17.39 | 12.54 | 16.87 | 0.87 |
| 513.8958 | 45.46  | 18.53 | 17.84 | 17.40 | 15.52 | 0.50 |
| 513.9254 | 48.62  | 14.55 | 12.96 | 13.39 | 14.90 | 0.63 |
| 514.0014 | 79.43  | 13.97 | 13.34 | 14.86 | 12.64 | 0.08 |
| 514.0495 | 42.44  | 14.36 | 13.17 | 12.99 | 14.20 | 0.51 |
| 514.1578 | 277.55 | 14.95 | 15.34 | 15.74 | 14.65 | 0.28 |
| 514.3054 | 27.41  | 14.44 | 19.91 | 18.16 | 18.21 | 1.48 |
| 514.3761 | 24.87  | 13.37 | 14.93 | 11.63 | 16.03 | 0.17 |
| 514.5602 | 46.66  | 17.75 | 17.16 | 17.18 | 16.28 | 0.62 |
| 514.6492 | 46.06  | 20.15 | 21.04 | 20.81 | 20.50 | 0.58 |
| 514.7668 | 51.02  | 16.40 | 9.48  | 10.17 | 10.98 | 1.90 |
| 514.7825 | 47.08  | 15.13 | 15.67 | 16.11 | 16.36 | 0.61 |
| 514.8070 | 28.69  | 12.60 | 18.81 | 16.66 | 17.39 | 1.66 |
| 514.8777 | 36.25  | 17.63 | 16.27 | 15.69 | 16.70 | 0.92 |
| 514.9207 | 43.88  | 13.90 | 16.13 | 16.16 | 16.75 | 1.32 |
| 514.9957 | 52.35  | 15.17 | 15.73 | 16.16 | 14.55 | 0.36 |
| 515.0253 | 62.5   | 17.06 | 17.08 | 17.54 | 16.43 | 0.06 |
| 515.1434 | 292.93 | 17.49 | 18.53 | 19.27 | 18.05 | 0.79 |
| 515.2130 | 79.81  | 23.47 | 23.37 | 22.15 | 22.38 | 0.38 |
| 515.2132 | 188.71 | 10.89 | 12.11 | 15.41 | 12.88 | 0.69 |
| 515.3132 | 27.45  | 17.73 | 22.96 | 21.22 | 21.17 | 1.75 |
| 515.4955 | 53.85  | 15.78 | 17.91 | 16.88 | 16.48 | 0.88 |
| 515.6461 | 293.91 | 16.20 | 17.67 | 17.85 | 16.84 | 1.03 |
| 515.6461 | 44.82  | 13.91 | 13.62 | 13.00 | 13.41 | 0.34 |
| 515.7771 | 48.83  | 14.21 | 16.61 | 16.82 | 15.44 | 1.02 |
| 515.8144 | 27.8   | 16.74 | 21.98 | 20.23 | 20.08 | 1.65 |
| 515.8674 | 50.41  | 17.47 | 18.32 | 18.37 | 17.51 | 0.54 |
| 515.9507 | 112.02 | 13.68 | 14.13 | 15.58 | 14.55 | 0.45 |
| 516.0728 | 86.1   | 12.81 | 15.52 | 15.35 | 14.91 | 0.95 |
| 516.1465 | 297.33 | 15.26 | 14.48 | 15.32 | 14.11 | 0.26 |
| 516.2169 | 79.38  | 21.04 | 20.69 | 19.26 | 19.70 | 0.53 |
| 516.3085 | 36.12  | 18.04 | 20.38 | 19.11 | 19.09 | 1.04 |
| 516.4935 | 53.59  | 13.63 | 15.03 | 13.09 | 13.58 | 0.21 |
| 516.5579 | 46.83  | 16.29 | 13.71 | 14.31 | 13.03 | 0.92 |
| 516.6466 | 46.15  | 19.69 | 20.38 | 20.14 | 19.92 | 0.47 |
| 516.6965 | 46.82  | 13.32 | 14.50 | 15.60 | 13.05 | 0.53 |
| 516.7320 | 46.16  | 16.78 | 19.18 | 19.31 | 19.07 | 1.77 |
| 516.8354 | 46.95  | 13.81 | 12.81 | 13.61 | 13.57 | 0.28 |
| 516.8590 | 50.75  | 17.08 | 18.16 | 18.41 | 17.73 | 0.87 |
| 516.9456 | 97.55  | 15.02 | 17.39 | 16.58 | 16.83 | 1.18 |
| 516.9779 | 44.99  | 16.07 | 16.38 | 16.27 | 17.34 | 0.30 |
| 517.2184 | 79.2   | 18.49 | 17.77 | 15.30 | 16.74 | 0.71 |
| 517.3062 | 42.38  | 15.81 | 16.23 | 15.12 | 14.72 | 0.10 |
| 517.7326 | 49.75  | 14.44 | 16.26 | 16.10 | 15.91 | 1.01 |
| 517.8644 | 48.08  | 16.08 | 16.76 | 17.28 | 16.39 | 0.54 |
| 517.8850 | 23.67  | 14.28 | 10.48 | 15.01 | 11.68 | 0.77 |
| 517.9651 | 60.09  | 16.84 | 14.43 | 16.52 | 15.03 | 0.69 |

|          |        |       |       |       |       |      |
|----------|--------|-------|-------|-------|-------|------|
| 518.1221 | 92.01  | 16.21 | 15.14 | 14.99 | 15.51 | 0.43 |
| 518.1650 | 97.69  | 14.36 | 15.85 | 13.25 | 15.51 | 0.29 |
| 518.2936 | 33.72  | 12.27 | 17.74 | 15.31 | 15.64 | 1.15 |
| 518.3221 | 39.25  | 21.27 | 21.97 | 22.28 | 21.29 | 0.71 |
| 518.6013 | 47.9   | 17.06 | 16.74 | 16.62 | 16.17 | 0.44 |
| 518.6441 | 46.32  | 18.30 | 18.81 | 18.55 | 18.45 | 0.33 |
| 518.6937 | 46.69  | 13.65 | 13.38 | 14.60 | 12.89 | 0.06 |
| 518.7330 | 47     | 17.65 | 19.43 | 19.55 | 19.43 | 1.69 |
| 518.7419 | 48.86  | 15.04 | 15.05 | 14.41 | 16.10 | 0.03 |
| 518.7869 | 47.18  | 14.33 | 15.48 | 14.87 | 15.06 | 0.32 |
| 518.8582 | 48.25  | 15.43 | 17.79 | 18.06 | 17.08 | 1.51 |
| 518.9947 | 42.25  | 14.65 | 13.65 | 13.66 | 15.58 | 0.32 |
| 519.0496 | 84.33  | 15.47 | 14.81 | 17.39 | 14.31 | 0.09 |
| 519.0527 | 221.61 | 11.98 | 14.36 | 15.62 | 13.58 | 1.08 |
| 519.0754 | 87.64  | 15.49 | 17.55 | 18.55 | 17.01 | 1.48 |
| 519.1393 | 293.95 | 16.89 | 14.60 | 15.03 | 15.09 | 1.37 |
| 519.2677 | 272.16 | 15.68 | 15.18 | 15.42 | 15.39 | 0.20 |
| 519.3255 | 37.21  | 19.32 | 19.87 | 20.14 | 19.07 | 0.50 |
| 519.4354 | 270.75 | 15.32 | 15.09 | 15.14 | 14.73 | 0.16 |
| 519.5555 | 242.58 | 12.13 | 12.03 | 13.74 | 12.22 | 0.26 |
| 519.7305 | 49.53  | 15.45 | 17.20 | 17.23 | 16.96 | 1.24 |
| 519.8289 | 34.66  | 12.74 | 17.31 | 15.10 | 12.88 | 1.00 |
| 520.0389 | 57.32  | 14.84 | 15.06 | 15.07 | 16.60 | 0.20 |
| 520.1388 | 23.8   | 16.30 | 14.85 | 16.16 | 16.20 | 0.37 |
| 520.1391 | 192.42 | 14.24 | 11.87 | 12.65 | 12.36 | 0.79 |
| 520.3398 | 28.1   | 24.36 | 24.75 | 24.48 | 24.28 | 0.23 |
| 520.5992 | 49.28  | 18.24 | 18.37 | 18.36 | 17.60 | 0.01 |
| 520.6382 | 45.43  | 14.47 | 15.10 | 14.71 | 14.59 | 0.21 |
| 520.7324 | 47.22  | 16.02 | 18.04 | 18.19 | 18.14 | 1.48 |
| 520.7807 | 47.71  | 13.34 | 14.08 | 14.77 | 14.36 | 0.54 |
| 520.8232 | 46.6   | 16.40 | 17.71 | 17.83 | 17.78 | 1.15 |
| 520.8548 | 50.49  | 13.83 | 13.72 | 13.72 | 13.02 | 0.11 |
| 520.8894 | 41.53  | 15.49 | 17.64 | 18.36 | 16.60 | 1.46 |
| 520.9442 | 55.12  | 20.04 | 19.65 | 18.96 | 18.50 | 0.52 |
| 521.0331 | 44.38  | 17.75 | 19.38 | 19.21 | 19.08 | 1.25 |
| 521.0667 | 282.91 | 12.18 | 17.40 | 18.17 | 17.72 | 1.23 |
| 521.1008 | 228.64 | 11.15 | 14.83 | 14.67 | 13.50 | 1.23 |
| 521.1356 | 25.89  | 15.21 | 11.64 | 14.52 | 14.66 | 0.57 |
| 521.1975 | 27.74  | 15.59 | 18.48 | 17.82 | 18.35 | 1.77 |
| 521.3345 | 28.2   | 14.13 | 14.47 | 12.23 | 13.18 | 0.32 |
| 521.3432 | 27.74  | 22.54 | 22.91 | 22.75 | 22.32 | 0.22 |
| 521.7279 | 49.74  | 13.65 | 15.50 | 15.44 | 15.07 | 0.89 |
| 521.8136 | 48.1   | 14.92 | 17.43 | 17.77 | 16.96 | 1.51 |
| 521.8417 | 26.61  | 13.87 | 12.76 | 15.62 | 11.60 | 0.07 |
| 521.9406 | 54.21  | 19.18 | 21.18 | 20.98 | 20.35 | 1.15 |
| 522.0353 | 41.36  | 14.29 | 15.06 | 14.82 | 14.90 | 0.44 |
| 522.1206 | 70.39  | 17.18 | 17.95 | 18.82 | 17.85 | 0.85 |
| 522.1574 | 71.81  | 12.53 | 14.87 | 13.76 | 14.96 | 0.87 |
| 522.2027 | 136.69 | 14.66 | 16.39 | 16.41 | 15.44 | 0.77 |
| 522.3453 | 27.63  | 17.48 | 18.26 | 18.05 | 17.92 | 0.61 |
| 522.3554 | 26.86  | 23.98 | 24.01 | 23.62 | 23.34 | 0.21 |
| 522.5956 | 52.83  | 18.71 | 18.57 | 18.50 | 18.15 | 0.23 |
| 522.6798 | 45.96  | 19.20 | 20.67 | 20.46 | 20.27 | 1.12 |
| 522.8063 | 50.03  | 16.63 | 18.46 | 18.79 | 17.93 | 1.18 |
| 522.8187 | 45.86  | 13.38 | 15.74 | 15.56 | 15.74 | 0.97 |
| 522.8724 | 267.29 | 12.92 | 15.96 | 16.96 | 15.45 | 1.23 |

|          |        |       |       |       |       |      |
|----------|--------|-------|-------|-------|-------|------|
| 522.8880 | 41.48  | 13.18 | 14.27 | 15.62 | 13.68 | 0.76 |
| 522.9400 | 59.29  | 16.83 | 17.48 | 16.67 | 16.61 | 0.13 |
| 523.0333 | 49.48  | 15.65 | 15.33 | 14.41 | 15.30 | 0.27 |
| 523.0479 | 53.64  | 22.66 | 24.27 | 24.15 | 23.93 | 1.27 |
| 523.0727 | 269.18 | 15.55 | 16.91 | 17.88 | 16.36 | 0.80 |
| 523.1049 | 61.34  | 18.21 | 19.82 | 20.21 | 19.54 | 1.31 |
| 523.1542 | 72.14  | 15.31 | 17.09 | 15.73 | 16.54 | 0.62 |
| 523.2407 | 33.08  | 14.13 | 18.56 | 18.40 | 18.05 | 1.80 |
| 523.2736 | 266.76 | 16.04 | 15.88 | 17.07 | 15.67 | 0.18 |
| 523.2987 | 28.94  | 16.88 | 9.96  | 10.48 | 12.15 | 1.27 |
| 523.3502 | 27.11  | 12.69 | 13.68 | 13.37 | 13.42 | 0.35 |
| 523.3587 | 27.15  | 22.16 | 22.11 | 21.79 | 21.34 | 0.25 |
| 523.4737 | 266.38 | 13.21 | 15.09 | 16.48 | 14.91 | 1.10 |
| 523.4814 | 53.45  | 14.40 | 16.62 | 16.03 | 14.73 | 0.76 |
| 523.5490 | 55.7   | 13.99 | 15.56 | 14.24 | 15.20 | 0.49 |
| 523.6745 | 268.68 | 14.03 | 15.02 | 16.00 | 15.25 | 0.68 |
| 523.6753 | 46.38  | 16.36 | 15.31 | 14.72 | 15.57 | 0.70 |
| 523.8065 | 45.56  | 16.99 | 17.52 | 17.69 | 16.63 | 0.36 |
| 523.8737 | 270.22 | 15.46 | 14.55 | 15.36 | 14.32 | 0.34 |
| 523.9332 | 52.21  | 18.01 | 19.83 | 19.71 | 19.11 | 1.11 |
| 523.9734 | 59.62  | 17.28 | 13.06 | 15.36 | 13.05 | 0.91 |
| 524.0079 | 86.07  | 15.15 | 17.65 | 16.72 | 16.49 | 1.17 |
| 524.0520 | 54.15  | 19.06 | 20.59 | 20.34 | 20.28 | 1.04 |
| 524.2982 | 33.2   | 17.66 | 14.62 | 14.35 | 16.06 | 1.19 |
| 524.3709 | 28.68  | 25.29 | 25.68 | 25.53 | 25.20 | 0.30 |
| 524.5436 | 47.54  | 16.25 | 14.78 | 14.26 | 14.27 | 0.82 |
| 524.5940 | 50.28  | 17.65 | 17.71 | 17.59 | 17.18 | 0.06 |
| 524.6774 | 46.06  | 19.57 | 21.01 | 20.81 | 20.62 | 1.12 |
| 524.8023 | 49.53  | 17.31 | 18.74 | 18.98 | 18.20 | 1.05 |
| 524.8662 | 32.94  | 9.97  | 16.90 | 10.34 | 16.37 | 0.98 |
| 524.9476 | 269.08 | 11.54 | 15.24 | 13.35 | 13.87 | 0.71 |
| 525.0433 | 53.13  | 20.16 | 21.76 | 21.70 | 21.32 | 1.30 |
| 525.3744 | 28.48  | 23.42 | 23.86 | 23.75 | 23.09 | 0.26 |
| 525.6729 | 47.15  | 17.24 | 16.84 | 16.66 | 16.97 | 0.34 |
| 525.7526 | 272.01 | 14.82 | 13.56 | 14.90 | 14.31 | 0.29 |
| 525.8035 | 47.45  | 14.17 | 15.03 | 14.94 | 14.21 | 0.36 |
| 525.8717 | 28.17  | 14.94 | 19.43 | 16.27 | 19.06 | 1.29 |
| 525.8963 | 53.15  | 19.40 | 18.23 | 17.90 | 17.33 | 0.94 |
| 526.0469 | 53.78  | 15.84 | 17.67 | 17.32 | 17.17 | 1.14 |
| 526.2915 | 27.83  | 20.17 | 19.79 | 20.20 | 19.14 | 0.26 |
| 526.3112 | 32.52  | 17.97 | 18.57 | 15.90 | 18.01 | 0.24 |
| 526.3771 | 28.03  | 20.81 | 21.38 | 21.18 | 20.67 | 0.36 |
| 526.4865 | 53.81  | 15.93 | 17.57 | 16.15 | 16.39 | 0.51 |
| 526.5404 | 46.12  | 17.69 | 16.91 | 17.09 | 16.30 | 0.59 |
| 526.5594 | 256    | 12.16 | 11.79 | 13.41 | 11.74 | 0.09 |
| 526.5928 | 49.05  | 16.12 | 14.23 | 14.39 | 14.86 | 0.94 |
| 526.6751 | 46.09  | 18.69 | 20.02 | 19.84 | 19.67 | 1.05 |
| 526.7253 | 46.83  | 13.81 | 15.54 | 16.20 | 13.95 | 0.95 |
| 526.7646 | 47.18  | 16.97 | 18.46 | 18.60 | 18.83 | 1.24 |
| 526.8045 | 40.3   | 16.51 | 18.07 | 17.79 | 17.65 | 1.23 |
| 526.8863 | 41.42  | 17.75 | 20.05 | 19.01 | 19.87 | 1.24 |
| 526.9528 | 304.99 | 14.64 | 15.35 | 12.28 | 12.83 | 0.40 |
| 527.0074 | 79.44  | 13.55 | 18.15 | 16.59 | 15.93 | 1.20 |
| 527.0392 | 53.76  | 14.19 | 16.54 | 15.99 | 15.99 | 0.79 |
| 527.0571 | 37.83  | 13.28 | 13.26 | 16.01 | 12.29 | 0.31 |
| 527.0575 | 265.25 | 15.49 | 15.54 | 14.80 | 14.11 | 0.22 |

|          |        |       |       |       |       |      |
|----------|--------|-------|-------|-------|-------|------|
| 527.1596 | 136    | 12.81 | 17.87 | 17.18 | 15.90 | 1.20 |
| 527.1628 | 275.33 | 10.46 | 16.56 | 15.74 | 14.18 | 1.29 |
| 527.2953 | 26.51  | 18.26 | 17.08 | 18.18 | 17.53 | 0.48 |
| 527.3134 | 29.36  | 16.85 | 21.76 | 19.98 | 19.91 | 1.49 |
| 527.3808 | 26.89  | 17.46 | 18.51 | 17.98 | 18.48 | 0.67 |
| 527.3857 | 275.11 | 12.63 | 16.27 | 13.07 | 16.19 | 0.68 |
| 527.4843 | 54.52  | 13.75 | 14.85 | 12.66 | 13.38 | 0.03 |
| 527.6692 | 48.34  | 16.41 | 14.46 | 14.27 | 14.29 | 0.87 |
| 527.7624 | 48.6   | 15.39 | 16.61 | 16.92 | 16.49 | 0.68 |
| 527.8146 | 28.03  | 15.17 | 20.80 | 19.06 | 19.33 | 1.71 |
| 527.8751 | 52.22  | 18.51 | 12.20 | 13.65 | 13.02 | 1.57 |
| 527.8909 | 39.43  | 15.69 | 14.82 | 12.82 | 16.13 | 0.47 |
| 528.0064 | 91.96  | 12.30 | 17.89 | 17.21 | 14.75 | 1.57 |
| 528.1625 | 134.86 | 8.29  | 12.06 | 11.61 | 11.37 | 1.09 |
| 528.2747 | 277.67 | 16.14 | 15.36 | 16.49 | 15.65 | 0.15 |
| 528.3204 | 27.37  | 15.98 | 21.05 | 18.99 | 19.42 | 1.64 |
| 528.3867 | 277.8  | 15.55 | 16.34 | 16.41 | 15.81 | 0.32 |
| 528.4982 | 275.73 | 15.47 | 15.41 | 15.83 | 15.22 | 0.04 |
| 528.5379 | 46.22  | 17.83 | 17.26 | 17.29 | 16.34 | 0.48 |
| 528.6092 | 277.55 | 15.10 | 15.82 | 15.67 | 15.30 | 0.28 |
| 528.6302 | 47.33  | 17.04 | 17.76 | 17.74 | 17.26 | 0.66 |
| 528.6733 | 46.31  | 16.94 | 18.01 | 17.79 | 18.00 | 1.07 |
| 528.7221 | 33.63  | 12.95 | 12.01 | 14.37 | 12.11 | 0.01 |
| 528.7641 | 47.64  | 16.08 | 18.26 | 18.35 | 18.56 | 1.42 |
| 528.8204 | 29.89  | 14.83 | 19.61 | 17.80 | 18.56 | 1.68 |
| 528.8855 | 50.71  | 17.62 | 17.20 | 17.36 | 16.47 | 0.41 |
| 529.0033 | 283.12 | 11.93 | 14.24 | 14.78 | 14.33 | 0.81 |
| 529.0078 | 90.75  | 7.47  | 14.46 | 12.46 | 10.63 | 1.38 |
| 529.0247 | 272.6  | 16.08 | 17.21 | 18.36 | 17.10 | 0.83 |
| 529.0530 | 92     | 11.26 | 12.74 | 10.91 | 13.21 | 0.36 |
| 529.2756 | 273.24 | 16.25 | 17.94 | 19.08 | 17.55 | 1.06 |
| 529.3113 | 26.87  | 15.69 | 15.43 | 15.17 | 13.78 | 0.21 |
| 529.3287 | 27.53  | 16.61 | 22.34 | 20.72 | 20.68 | 1.84 |
| 529.5262 | 271.11 | 14.57 | 17.08 | 17.84 | 16.39 | 1.13 |
| 529.6660 | 48.07  | 15.29 | 12.26 | 11.71 | 12.40 | 0.99 |
| 529.7604 | 49.74  | 14.07 | 16.87 | 16.67 | 16.26 | 1.30 |
| 529.7763 | 174.37 | 7.16  | 16.59 | 14.06 | 15.81 | 1.73 |
| 529.8306 | 27.59  | 15.05 | 21.45 | 19.83 | 19.65 | 1.82 |
| 529.8726 | 51.67  | 17.04 | 10.55 | 11.03 | 11.95 | 1.65 |
| 530.0281 | 186.87 | 6.83  | 13.57 | 12.76 | 12.44 | 1.62 |
| 530.0288 | 83.83  | 9.03  | 15.81 | 15.09 | 13.09 | 1.52 |
| 530.1156 | 72.32  | 17.46 | 19.96 | 19.64 | 19.10 | 0.98 |
| 530.2884 | 26.39  | 15.79 | 18.30 | 17.17 | 16.77 | 0.78 |
| 530.3235 | 25.46  | 17.35 | 11.52 | 14.95 | 12.66 | 1.50 |
| 530.3322 | 27.24  | 13.51 | 19.51 | 17.04 | 17.87 | 1.73 |
| 530.5348 | 46.18  | 17.53 | 16.48 | 16.59 | 15.90 | 0.81 |
| 530.6280 | 47.14  | 18.26 | 19.07 | 19.04 | 18.47 | 0.70 |
| 530.7637 | 48.22  | 13.99 | 15.73 | 15.83 | 16.38 | 0.96 |
| 530.8451 | 30.79  | 17.21 | 15.97 | 15.16 | 15.80 | 0.83 |
| 530.8931 | 21.95  | 13.46 | 11.01 | 15.10 | 12.21 | 0.28 |
| 530.9700 | 51.91  | 14.51 | 14.30 | 15.59 | 12.54 | 0.00 |
| 530.9967 | 59.6   | 16.26 | 16.50 | 17.83 | 16.73 | 0.42 |
| 531.1248 | 73.35  | 14.75 | 13.24 | 13.70 | 12.63 | 0.74 |
| 531.1366 | 159.76 | 15.06 | 17.10 | 16.94 | 15.81 | 0.79 |
| 531.2731 | 41.85  | 11.13 | 10.03 | 10.26 | 13.85 | 0.13 |
| 531.2934 | 43.8   | 13.74 | 14.55 | 11.89 | 12.21 | 0.13 |

|          |        |       |       |       |       |      |
|----------|--------|-------|-------|-------|-------|------|
| 531.3256 | 27.21  | 15.21 | 16.03 | 15.75 | 14.24 | 0.18 |
| 531.4695 | 53.66  | 14.03 | 13.21 | 14.27 | 12.19 | 0.26 |
| 531.7591 | 49.92  | 13.96 | 15.11 | 14.08 | 14.18 | 0.31 |
| 531.8413 | 50.06  | 16.99 | 17.02 | 17.45 | 16.58 | 0.10 |
| 531.9648 | 65.05  | 20.17 | 21.04 | 20.38 | 19.74 | 0.29 |
| 532.1207 | 294.26 | 12.70 | 16.30 | 14.78 | 14.08 | 0.75 |
| 532.1394 | 150.5  | 13.90 | 12.77 | 12.78 | 12.58 | 0.68 |
| 532.1875 | 197.3  | 16.12 | 17.73 | 16.78 | 17.14 | 1.03 |
| 532.2757 | 278.77 | 13.45 | 15.85 | 16.39 | 14.94 | 0.75 |
| 532.2796 | 34.09  | 16.96 | 19.02 | 18.46 | 18.71 | 1.29 |
| 532.4195 | 278.85 | 14.68 | 16.06 | 16.67 | 15.60 | 0.80 |
| 532.5324 | 46.33  | 16.35 | 13.41 | 14.02 | 13.44 | 1.21 |
| 532.5625 | 278.6  | 15.40 | 15.04 | 15.45 | 14.88 | 0.15 |
| 532.6250 | 47.27  | 18.18 | 18.88 | 18.83 | 18.49 | 0.68 |
| 532.6705 | 46.06  | 14.35 | 14.62 | 15.77 | 13.71 | 0.30 |
| 532.7096 | 46.07  | 18.62 | 20.56 | 20.36 | 20.27 | 1.49 |
| 532.8089 | 47.99  | 12.62 | 14.80 | 14.01 | 12.72 | 0.46 |
| 532.8359 | 49.64  | 16.13 | 17.42 | 17.46 | 16.22 | 0.73 |
| 532.9690 | 55.88  | 16.43 | 16.75 | 15.30 | 14.57 | 0.23 |
| 532.9973 | 67.51  | 11.90 | 10.55 | 13.08 | 12.55 | 0.03 |
| 533.0669 | 272.98 | 15.42 | 15.94 | 17.43 | 15.82 | 0.52 |
| 533.1241 | 190.87 | 9.34  | 14.39 | 15.88 | 11.35 | 1.30 |
| 533.2836 | 31.9   | 14.94 | 16.65 | 15.99 | 16.22 | 0.59 |
| 533.6631 | 170.79 | 7.46  | 11.90 | 11.05 | 10.80 | 1.09 |
| 533.7083 | 47.15  | 15.53 | 17.20 | 16.78 | 17.01 | 1.11 |
| 533.8331 | 42.01  | 16.23 | 15.92 | 16.54 | 15.93 | 0.06 |
| 533.8642 | 169.55 | 8.37  | 13.56 | 12.29 | 12.77 | 1.60 |
| 533.9616 | 54.66  | 17.08 | 17.49 | 16.33 | 15.99 | 0.13 |
| 534.0390 | 54.78  | 13.53 | 18.11 | 17.57 | 16.91 | 1.44 |
| 534.0641 | 173.12 | 7.57  | 10.72 | 11.00 | 9.78  | 0.87 |
| 534.1296 | 99.35  | 16.35 | 11.85 | 14.24 | 12.96 | 1.11 |
| 534.2956 | 34.17  | 21.13 | 23.49 | 23.16 | 22.53 | 1.52 |
| 534.4730 | 53.42  | 15.21 | 17.28 | 16.75 | 15.66 | 0.95 |
| 534.5766 | 46.95  | 16.44 | 15.21 | 15.65 | 14.97 | 0.55 |
| 534.6230 | 47.25  | 17.00 | 17.80 | 17.61 | 17.19 | 0.58 |
| 534.7070 | 46.08  | 18.70 | 20.55 | 20.39 | 20.30 | 1.50 |
| 534.8047 | 46.9   | 14.88 | 13.96 | 13.63 | 13.92 | 0.52 |
| 534.8309 | 65.42  | 15.84 | 18.01 | 17.96 | 16.68 | 0.95 |
| 534.9764 | 39.02  | 14.57 | 15.62 | 15.47 | 15.64 | 0.71 |
| 534.9894 | 41.68  | 14.91 | 15.14 | 15.20 | 17.00 | 0.27 |
| 535.0370 | 54.38  | 14.63 | 15.65 | 14.80 | 15.35 | 0.41 |
| 535.0532 | 97.95  | 17.64 | 11.45 | 15.47 | 13.96 | 1.23 |
| 535.2993 | 33.35  | 19.30 | 21.39 | 21.11 | 20.55 | 1.52 |
| 535.6577 | 293.65 | 16.82 | 19.02 | 19.24 | 17.83 | 1.23 |
| 535.7067 | 48.75  | 14.06 | 17.88 | 17.84 | 17.62 | 1.65 |
| 536.1357 | 59.81  | 17.11 | 17.47 | 18.76 | 18.04 | 0.57 |
| 536.1604 | 280.39 | 15.51 | 13.73 | 14.16 | 15.53 | 0.42 |
| 536.2975 | 35.28  | 16.61 | 19.10 | 18.69 | 18.01 | 1.14 |
| 536.3348 | 27.86  | 15.63 | 16.13 | 14.67 | 14.88 | 0.10 |
| 536.5732 | 49.31  | 17.67 | 18.15 | 18.14 | 16.83 | 0.13 |
| 536.6192 | 46.65  | 15.81 | 14.53 | 14.50 | 14.39 | 0.61 |
| 536.6603 | 297.77 | 15.01 | 15.01 | 14.80 | 14.40 | 0.12 |
| 536.7043 | 46.15  | 17.49 | 19.25 | 19.19 | 19.09 | 1.54 |
| 536.7551 | 47.1   | 12.86 | 14.36 | 15.30 | 13.72 | 0.86 |
| 536.7983 | 47.72  | 16.37 | 17.46 | 17.80 | 17.74 | 0.81 |
| 536.8656 | 24.6   | 9.23  | 16.31 | 9.23  | 15.62 | 0.95 |

|          |        |       |       |       |       |      |
|----------|--------|-------|-------|-------|-------|------|
| 536.8850 | 41.59  | 14.95 | 14.85 | 16.91 | 15.11 | 0.34 |
| 536.9180 | 53.6   | 19.56 | 19.09 | 19.08 | 18.02 | 0.43 |
| 537.0080 | 59.73  | 16.41 | 14.38 | 14.86 | 14.48 | 0.93 |
| 537.0265 | 42.37  | 14.43 | 16.86 | 18.47 | 16.60 | 1.40 |
| 537.1666 | 29.03  | 20.81 | 19.57 | 20.12 | 20.28 | 0.63 |
| 537.1952 | 77.84  | 20.82 | 21.49 | 18.82 | 20.06 | 0.26 |
| 537.2970 | 32.95  | 7.00  | 15.97 | 14.92 | 13.74 | 1.76 |
| 537.3674 | 24.6   | 12.94 | 15.75 | 10.98 | 15.49 | 0.36 |
| 537.4767 | 53.75  | 16.00 | 17.49 | 15.81 | 16.25 | 0.36 |
| 537.6610 | 304.26 | 15.07 | 18.13 | 18.21 | 17.69 | 1.65 |
| 537.7045 | 51.25  | 15.06 | 17.18 | 17.16 | 16.89 | 1.46 |
| 537.7920 | 50.29  | 15.43 | 15.91 | 15.94 | 15.85 | 0.27 |
| 537.8727 | 26.92  | 13.47 | 18.89 | 14.00 | 18.89 | 0.96 |
| 537.9107 | 49.82  | 19.18 | 21.02 | 21.19 | 20.12 | 1.11 |
| 538.0282 | 48.72  | 12.13 | 11.94 | 13.95 | 12.45 | 0.18 |
| 538.0833 | 309.19 | 13.00 | 15.40 | 11.75 | 11.45 | 0.14 |
| 538.1273 | 233.63 | 17.20 | 22.02 | 22.38 | 20.88 | 1.44 |
| 538.1625 | 301.02 | 14.41 | 16.62 | 16.65 | 16.38 | 1.17 |
| 538.1668 | 31.34  | 19.07 | 16.98 | 17.88 | 17.99 | 0.78 |
| 538.1984 | 78.21  | 18.43 | 18.69 | 15.11 | 17.54 | 0.53 |
| 538.3047 | 28.78  | 13.41 | 16.58 | 13.34 | 15.18 | 0.60 |
| 538.3495 | 26.5   | 17.17 | 15.90 | 15.26 | 14.80 | 0.65 |
| 538.3825 | 26.47  | 18.30 | 19.24 | 18.55 | 19.00 | 0.53 |
| 538.5307 | 272.09 | 15.39 | 16.25 | 16.48 | 16.21 | 0.57 |
| 538.5708 | 49.92  | 18.11 | 18.30 | 18.35 | 17.39 | 0.05 |
| 538.6115 | 45.01  | 14.95 | 12.60 | 13.66 | 12.39 | 0.56 |
| 538.6595 | 47.14  | 16.93 | 18.45 | 18.42 | 17.83 | 1.08 |
| 538.7045 | 46.88  | 14.19 | 15.95 | 15.90 | 15.74 | 0.88 |
| 538.7811 | 277.96 | 15.10 | 15.72 | 16.48 | 16.22 | 0.45 |
| 538.7977 | 46.4   | 13.35 | 16.53 | 16.70 | 16.64 | 1.08 |
| 538.8358 | 23.49  | 14.12 | 13.82 | 15.03 | 13.34 | 0.04 |
| 538.8809 | 27.34  | 14.09 | 18.45 | 16.10 | 18.58 | 1.37 |
| 538.9145 | 52.17  | 16.75 | 17.47 | 17.54 | 16.25 | 0.34 |
| 539.0122 | 58.45  | 12.73 | 13.90 | 16.05 | 14.90 | 0.45 |
| 539.0263 | 68.12  | 21.84 | 21.95 | 22.08 | 21.99 | 0.10 |
| 539.0317 | 271.09 | 14.54 | 14.98 | 14.83 | 14.55 | 0.17 |
| 539.1147 | 143.49 | 11.32 | 12.37 | 12.85 | 12.37 | 0.67 |
| 539.1310 | 233.68 | 12.63 | 19.82 | 20.28 | 18.64 | 1.68 |
| 539.1645 | 26.07  | 15.86 | 14.29 | 15.61 | 15.96 | 0.31 |
| 539.2003 | 77.68  | 14.82 | 14.15 | 11.53 | 12.89 | 0.72 |
| 539.2815 | 270.3  | 14.44 | 13.18 | 15.27 | 14.28 | 0.10 |
| 539.2830 | 87.38  | 10.89 | 14.06 | 14.92 | 14.57 | 0.90 |
| 539.3131 | 27.38  | 14.99 | 20.76 | 18.72 | 19.06 | 1.55 |
| 539.3855 | 25.86  | 15.79 | 16.59 | 14.25 | 17.43 | 0.02 |
| 539.7029 | 49.32  | 13.28 | 14.74 | 14.73 | 14.18 | 0.78 |
| 539.7873 | 50.38  | 14.04 | 14.14 | 14.54 | 13.23 | 0.03 |
| 539.8135 | 26.16  | 15.35 | 19.88 | 18.35 | 18.65 | 1.57 |
| 539.8883 | 27.78  | 12.27 | 17.69 | 11.01 | 17.29 | 0.70 |
| 539.9087 | 50.42  | 17.95 | 19.90 | 20.11 | 19.03 | 1.06 |
| 539.9479 | 58.27  | 16.67 | 13.65 | 15.79 | 13.58 | 0.68 |
| 539.9486 | 256.82 | 13.02 | 13.26 | 14.15 | 13.20 | 0.21 |
| 540.0252 | 54.56  | 18.21 | 18.25 | 18.31 | 18.19 | 0.03 |
| 540.1225 | 234.08 | 13.58 | 16.93 | 17.44 | 16.31 | 1.33 |
| 540.1336 | 225.01 | 7.53  | 13.42 | 13.46 | 12.64 | 1.51 |
| 540.1484 | 97.86  | 14.64 | 12.11 | 13.71 | 12.70 | 0.79 |
| 540.3186 | 25.61  | 14.48 | 19.13 | 16.69 | 17.72 | 1.55 |



|          |        |       |       |       |       |      |
|----------|--------|-------|-------|-------|-------|------|
| 540.3908 | 24.84  | 14.30 | 16.37 | 12.11 | 16.97 | 0.20 |
| 540.5172 | 45.78  | 16.20 | 12.63 | 12.69 | 13.57 | 1.27 |
| 540.5682 | 48.64  | 17.47 | 17.48 | 17.47 | 16.92 | 0.06 |
| 540.6570 | 47.08  | 18.10 | 19.44 | 19.40 | 18.99 | 1.26 |
| 540.7066 | 40.68  | 12.21 | 11.27 | 14.73 | 11.84 | 0.15 |
| 540.7767 | 49.73  | 17.22 | 17.06 | 17.03 | 15.65 | 0.16 |
| 540.8260 | 25.94  | 14.01 | 17.49 | 15.30 | 16.18 | 1.08 |
| 540.9114 | 50.77  | 13.79 | 13.46 | 13.46 | 13.04 | 0.18 |
| 541.0026 | 45.81  | 12.46 | 14.74 | 13.74 | 14.99 | 0.72 |
| 541.0182 | 54.66  | 19.65 | 19.55 | 19.78 | 19.54 | 0.01 |
| 541.1211 | 49.54  | 13.94 | 11.39 | 11.83 | 12.29 | 0.78 |
| 541.1261 | 226.82 | 8.40  | 12.75 | 12.45 | 12.52 | 1.24 |
| 541.3288 | 27.29  | 14.01 | 20.23 | 18.20 | 18.72 | 1.80 |
| 541.6461 | 47.38  | 16.22 | 9.71  | 10.10 | 10.66 | 1.51 |
| 541.8307 | 27.64  | 12.65 | 19.32 | 17.29 | 17.69 | 1.82 |
| 541.8700 | 53.18  | 18.36 | 16.04 | 16.42 | 15.16 | 0.79 |
| 541.9049 | 51.5   | 15.32 | 16.32 | 16.66 | 15.57 | 0.62 |
| 542.0231 | 55.84  | 15.69 | 15.49 | 15.52 | 15.90 | 0.05 |
| 542.0681 | 289.17 | 16.18 | 20.35 | 20.04 | 18.44 | 1.70 |
| 542.3221 | 36.7   | 19.89 | 20.07 | 20.17 | 19.59 | 0.16 |
| 542.3360 | 27.23  | 15.33 | 18.99 | 16.04 | 17.81 | 1.13 |
| 542.4600 | 53.25  | 12.41 | 13.99 | 15.08 | 11.62 | 0.52 |
| 542.5002 | 279.2  | 15.21 | 14.58 | 14.53 | 14.15 | 0.45 |
| 542.5141 | 45.62  | 17.48 | 15.53 | 16.16 | 15.34 | 0.82 |
| 542.5674 | 48.03  | 14.97 | 14.94 | 14.32 | 14.31 | 0.14 |
| 542.6539 | 47.14  | 17.75 | 18.96 | 18.97 | 18.58 | 1.20 |
| 542.6989 | 46.18  | 13.46 | 14.93 | 16.38 | 14.22 | 1.00 |
| 542.7381 | 45.97  | 17.73 | 20.33 | 20.00 | 20.37 | 1.52 |
| 542.7747 | 49.6   | 15.52 | 13.72 | 14.88 | 13.49 | 0.37 |
| 542.7910 | 45.77  | 11.84 | 17.12 | 15.32 | 15.72 | 1.48 |
| 542.8382 | 27.65  | 8.90  | 17.57 | 14.96 | 15.67 | 1.73 |
| 542.8636 | 51.42  | 16.44 | 16.76 | 17.53 | 15.62 | 0.19 |
| 542.8924 | 23.82  | 12.90 | 10.15 | 15.78 | 12.23 | 0.11 |
| 542.9441 | 273.76 | 15.09 | 14.14 | 15.54 | 14.62 | 0.23 |
| 543.0158 | 72.29  | 17.03 | 18.36 | 17.71 | 17.72 | 0.63 |
| 543.0716 | 295.49 | 14.33 | 14.68 | 14.91 | 13.24 | 0.10 |
| 543.1321 | 132.75 | 13.39 | 17.65 | 14.39 | 15.99 | 0.97 |
| 543.1747 | 70.4   | 13.93 | 13.04 | 11.23 | 13.40 | 0.60 |
| 543.3255 | 33.52  | 17.89 | 17.98 | 18.07 | 17.42 | 0.04 |
| 543.3442 | 27.16  | 15.02 | 19.63 | 18.00 | 18.23 | 1.79 |
| 543.6426 | 47.58  | 16.36 | 10.06 | 10.35 | 11.64 | 1.70 |
| 543.7379 | 46.38  | 14.78 | 17.34 | 16.79 | 17.64 | 1.41 |
| 543.8554 | 39.39  | 15.98 | 19.12 | 16.93 | 17.89 | 1.18 |
| 543.9443 | 278.46 | 12.44 | 14.36 | 14.13 | 13.38 | 0.67 |
| 543.9838 | 95.85  | 14.54 | 16.06 | 15.17 | 15.28 | 0.93 |
| 544.0117 | 89     | 14.86 | 16.96 | 16.83 | 15.20 | 0.80 |
| 544.0555 | 279.05 | 13.02 | 15.31 | 14.41 | 13.81 | 0.69 |
| 544.1027 | 70.31  | 17.92 | 14.19 | 15.72 | 15.09 | 1.23 |
| 544.1675 | 278.69 | 15.08 | 16.37 | 15.85 | 15.23 | 0.58 |
| 544.3394 | 28.79  | 23.57 | 23.41 | 23.20 | 22.97 | 0.31 |
| 544.5021 | 276.87 | 13.69 | 15.17 | 15.11 | 14.16 | 0.67 |
| 544.5106 | 45.61  | 18.00 | 16.37 | 16.49 | 16.17 | 0.85 |
| 544.6063 | 49.98  | 16.57 | 17.36 | 17.28 | 16.43 | 0.41 |
| 544.6139 | 277.51 | 15.17 | 15.05 | 14.85 | 14.81 | 0.17 |
| 544.6522 | 47.34  | 15.77 | 17.51 | 17.51 | 16.98 | 1.12 |
| 544.6968 | 46.19  | 13.58 | 13.13 | 14.32 | 12.55 | 0.04 |

|          |        |       |       |       |       |      |
|----------|--------|-------|-------|-------|-------|------|
| 544.7356 | 46     | 17.33 | 19.81 | 19.70 | 19.81 | 1.57 |
| 544.7874 | 46.31  | 9.15  | 15.01 | 13.25 | 11.94 | 1.09 |
| 544.8343 | 44.99  | 9.16  | 12.78 | 10.21 | 10.37 | 0.58 |
| 544.8612 | 49.35  | 15.27 | 15.56 | 15.74 | 15.00 | 0.10 |
| 545.0287 | 53.35  | 20.81 | 23.00 | 22.70 | 22.03 | 1.44 |
| 545.3429 | 28.93  | 21.85 | 21.61 | 21.50 | 21.25 | 0.38 |
| 545.4636 | 53.39  | 14.84 | 17.24 | 16.89 | 15.53 | 0.80 |
| 545.5039 | 278.26 | 14.65 | 14.40 | 14.56 | 13.57 | 0.15 |
| 545.5309 | 53.6   | 12.58 | 14.77 | 13.39 | 13.09 | 0.60 |
| 545.6187 | 279.89 | 15.26 | 14.94 | 14.81 | 14.92 | 0.24 |
| 545.7248 | 278.91 | 14.77 | 14.04 | 14.12 | 13.75 | 0.36 |
| 545.7347 | 48.15  | 15.08 | 17.37 | 17.19 | 17.33 | 1.38 |
| 545.8357 | 278.62 | 14.55 | 14.41 | 14.88 | 14.09 | 0.01 |
| 545.8614 | 38.03  | 13.56 | 15.64 | 12.79 | 16.67 | 0.47 |
| 545.8710 | 28.4   | 14.00 | 14.42 | 11.64 | 15.96 | 0.15 |
| 545.9468 | 279.04 | 15.36 | 15.59 | 14.87 | 14.33 | 0.11 |
| 546.0321 | 54.55  | 16.83 | 19.31 | 19.21 | 18.17 | 1.13 |
| 546.0860 | 73.16  | 16.68 | 18.88 | 19.44 | 17.84 | 1.10 |
| 546.1650 | 277.82 | 13.89 | 14.78 | 14.58 | 14.59 | 0.41 |
| 546.2029 | 125.62 | 15.31 | 16.77 | 16.77 | 16.61 | 1.03 |
| 546.2817 | 276.86 | 15.64 | 15.77 | 15.63 | 16.08 | 0.07 |
| 546.2828 | 34.43  | 18.70 | 16.58 | 16.39 | 17.24 | 1.21 |
| 546.3449 | 28.41  | 17.60 | 16.99 | 15.90 | 17.21 | 0.55 |
| 546.3545 | 36.05  | 20.92 | 21.29 | 21.28 | 20.63 | 0.24 |
| 546.4487 | 278.9  | 15.52 | 15.96 | 15.64 | 15.22 | 0.10 |
| 546.4620 | 53.23  | 13.78 | 14.47 | 13.30 | 13.84 | 0.08 |
| 546.5088 | 45.63  | 17.32 | 15.40 | 15.59 | 15.31 | 0.90 |
| 546.6068 | 46.83  | 18.08 | 18.89 | 18.83 | 17.62 | 0.36 |
| 546.6179 | 278.5  | 13.65 | 17.49 | 17.33 | 16.05 | 1.36 |
| 546.6469 | 46.11  | 15.68 | 15.84 | 16.04 | 15.70 | 0.13 |
| 546.7343 | 46.17  | 14.88 | 18.15 | 18.17 | 17.99 | 1.53 |
| 546.7848 | 46.24  | 9.93  | 12.68 | 13.84 | 13.20 | 1.13 |
| 546.7862 | 277.01 | 14.55 | 14.31 | 14.37 | 14.41 | 0.13 |
| 546.8298 | 39.07  | 15.20 | 16.85 | 17.41 | 17.22 | 0.87 |
| 546.9512 | 277.43 | 14.97 | 14.37 | 14.35 | 14.10 | 0.45 |
| 546.9644 | 53.14  | 11.06 | 12.38 | 15.58 | 13.07 | 0.79 |
| 547.0254 | 53.05  | 17.90 | 20.22 | 20.04 | 19.18 | 1.32 |
| 547.1312 | 249.85 | 8.86  | 16.28 | 14.15 | 12.55 | 1.59 |
| 547.1709 | 278.12 | 15.45 | 14.76 | 14.50 | 14.42 | 0.55 |
| 547.2411 | 32.89  | 11.05 | 17.53 | 17.35 | 17.08 | 1.76 |
| 547.2833 | 276.83 | 13.00 | 14.22 | 14.68 | 14.36 | 0.54 |
| 547.2858 | 34.01  | 15.23 | 11.02 | 10.82 | 12.96 | 1.36 |
| 547.3570 | 34.33  | 19.25 | 19.22 | 19.42 | 18.59 | 0.04 |
| 547.3944 | 277.94 | 15.61 | 16.66 | 16.14 | 15.45 | 0.33 |
| 547.5055 | 277.8  | 14.97 | 16.19 | 15.80 | 15.21 | 0.53 |
| 547.6168 | 277.53 | 14.49 | 15.77 | 15.30 | 14.78 | 0.55 |
| 547.7274 | 278.16 | 14.60 | 14.50 | 14.83 | 14.17 | 0.02 |
| 547.7329 | 49.27  | 14.17 | 15.90 | 16.04 | 15.95 | 1.05 |
| 547.8225 | 49.38  | 16.12 | 15.49 | 15.77 | 15.64 | 0.28 |
| 547.9406 | 61.27  | 19.60 | 20.11 | 20.23 | 18.49 | 0.18 |
| 548.0316 | 47.81  | 10.77 | 15.42 | 14.81 | 15.09 | 1.19 |
| 548.2764 | 278.37 | 15.65 | 16.35 | 15.82 | 15.75 | 0.20 |
| 548.3710 | 26.96  | 18.99 | 18.53 | 18.37 | 18.28 | 0.60 |
| 548.4426 | 278.4  | 14.09 | 14.01 | 13.72 | 13.64 | 0.14 |
| 548.4587 | 279.79 | 15.61 | 17.41 | 16.90 | 15.80 | 0.50 |
| 548.4851 | 265.18 | 14.65 | 14.12 | 15.79 | 14.75 | 0.11 |

|          |        |       |       |       |       |      |
|----------|--------|-------|-------|-------|-------|------|
| 548.5030 | 278.59 | 11.76 | 13.86 | 14.56 | 14.34 | 0.95 |
| 548.5057 | 46.28  | 15.83 | 12.51 | 12.91 | 13.13 | 1.11 |
| 548.6023 | 46.62  | 17.80 | 18.83 | 18.72 | 17.88 | 0.60 |
| 548.6257 | 280.48 | 15.01 | 17.97 | 17.34 | 16.23 | 0.74 |
| 548.6412 | 45.04  | 15.84 | 16.16 | 16.70 | 15.60 | 0.22 |
| 548.6853 | 258.2  | 13.07 | 14.66 | 15.86 | 14.36 | 0.72 |
| 548.6882 | 47.1   | 17.86 | 18.75 | 18.78 | 18.54 | 1.20 |
| 548.7254 | 278.61 | 13.56 | 13.98 | 13.90 | 13.41 | 0.13 |
| 548.7375 | 48.36  | 12.83 | 12.58 | 13.40 | 14.30 | 0.14 |
| 548.7850 | 47.15  | 14.24 | 13.21 | 13.71 | 13.22 | 0.39 |
| 548.7927 | 280.17 | 15.42 | 17.91 | 17.67 | 16.28 | 0.73 |
| 548.8217 | 44     | 16.40 | 17.28 | 17.75 | 17.77 | 0.95 |
| 548.8366 | 278.86 | 12.27 | 13.55 | 13.50 | 11.14 | 0.23 |
| 548.8624 | 40.94  | 12.59 | 14.06 | 13.08 | 13.67 | 0.47 |
| 548.8855 | 265.06 | 14.19 | 13.91 | 15.77 | 14.26 | 0.26 |
| 548.9439 | 54.35  | 15.44 | 15.15 | 14.17 | 12.15 | 0.34 |
| 548.9602 | 279.75 | 15.76 | 16.86 | 16.69 | 15.87 | 0.32 |
| 549.0805 | 94.42  | 10.80 | 16.69 | 15.42 | 14.77 | 1.74 |
| 549.0855 | 259.68 | 15.14 | 15.79 | 17.44 | 15.91 | 0.79 |
| 549.1273 | 281.13 | 14.31 | 16.07 | 15.55 | 14.41 | 0.38 |
| 549.1753 | 275.41 | 15.76 | 17.78 | 17.87 | 16.80 | 1.06 |
| 549.2582 | 33     | 14.20 | 16.45 | 15.73 | 16.57 | 1.22 |
| 549.2881 | 273.22 | 16.34 | 19.11 | 18.92 | 17.92 | 1.30 |
| 549.3742 | 27.57  | 16.61 | 13.72 | 14.17 | 14.23 | 1.12 |
| 549.3993 | 276.3  | 16.44 | 19.89 | 19.66 | 18.70 | 1.53 |
| 549.4876 | 27.28  | 15.61 | 11.57 | 11.62 | 11.93 | 1.01 |
| 549.4881 | 145.96 | 13.96 | 10.71 | 9.57  | 11.24 | 0.96 |
| 549.5104 | 276.04 | 16.79 | 19.82 | 19.59 | 18.53 | 1.42 |
| 549.6221 | 275.21 | 15.50 | 19.23 | 19.08 | 17.86 | 1.55 |
| 549.6850 | 49.78  | 13.65 | 16.03 | 16.08 | 14.95 | 1.20 |
| 549.7328 | 274.65 | 15.88 | 18.38 | 18.14 | 17.27 | 1.24 |
| 549.8186 | 50     | 15.10 | 15.31 | 15.50 | 15.58 | 0.16 |
| 549.8443 | 273.91 | 15.37 | 17.33 | 16.71 | 16.20 | 0.94 |
| 549.8732 | 25.16  | 14.65 | 18.03 | 14.00 | 17.94 | 0.75 |
| 549.9364 | 53.68  | 16.81 | 17.22 | 16.69 | 15.47 | 0.02 |
| 549.9556 | 272.8  | 15.81 | 15.40 | 15.40 | 15.06 | 0.29 |
| 549.9712 | 303.22 | 14.31 | 17.53 | 16.74 | 14.13 | 1.13 |
| 550.0662 | 275.9  | 15.24 | 14.30 | 14.99 | 14.21 | 0.46 |
| 550.1706 | 279.2  | 15.32 | 18.18 | 18.21 | 17.27 | 1.44 |
| 550.2816 | 278.96 | 15.90 | 19.13 | 19.19 | 18.07 | 1.48 |
| 550.3842 | 26.34  | 17.99 | 18.11 | 17.27 | 17.93 | 0.18 |
| 550.3912 | 279.51 | 14.02 | 19.00 | 18.89 | 18.09 | 1.61 |
| 550.5035 | 279.63 | 16.35 | 19.33 | 19.33 | 18.39 | 1.47 |
| 550.5514 | 49.01  | 15.25 | 14.71 | 14.60 | 14.30 | 0.32 |
| 550.6003 | 48.77  | 16.57 | 17.39 | 17.18 | 16.85 | 0.47 |
| 550.6166 | 277.35 | 16.02 | 18.64 | 18.60 | 17.62 | 1.33 |
| 550.6379 | 45.86  | 15.88 | 15.24 | 15.85 | 15.42 | 0.20 |
| 550.6846 | 46.71  | 18.51 | 19.53 | 19.57 | 19.18 | 1.16 |
| 550.7276 | 279.3  | 16.07 | 17.94 | 17.26 | 17.10 | 0.92 |
| 550.7296 | 45.88  | 11.39 | 13.38 | 15.12 | 13.48 | 1.01 |
| 550.7799 | 48.26  | 14.64 | 13.51 | 13.24 | 13.12 | 0.63 |
| 550.8136 | 52.34  | 14.08 | 17.49 | 17.64 | 16.88 | 1.46 |
| 550.8386 | 279.13 | 15.85 | 17.72 | 18.06 | 16.69 | 1.12 |
| 550.8808 | 24.82  | 14.70 | 18.98 | 15.89 | 18.56 | 1.10 |
| 550.9501 | 278.44 | 15.65 | 17.45 | 16.84 | 16.25 | 0.75 |
| 551.0615 | 278.76 | 14.42 | 15.59 | 15.28 | 14.73 | 0.58 |

|          |        |       |       |       |       |      |
|----------|--------|-------|-------|-------|-------|------|
| 551.0646 | 84.26  | 10.45 | 12.45 | 11.50 | 11.03 | 0.38 |
| 551.1225 | 276.59 | 15.43 | 14.57 | 14.58 | 14.63 | 0.59 |
| 551.2827 | 278.94 | 16.34 | 18.53 | 18.69 | 17.50 | 1.18 |
| 551.2964 | 71.19  | 10.52 | 13.17 | 14.04 | 11.65 | 0.88 |
| 551.3128 | 27.31  | 14.93 | 19.43 | 17.40 | 18.45 | 1.58 |
| 551.3849 | 25.44  | 15.39 | 18.25 | 14.74 | 18.12 | 0.61 |
| 551.4496 | 279.01 | 15.22 | 18.46 | 18.44 | 17.30 | 1.44 |
| 551.6221 | 275.97 | 14.85 | 13.97 | 14.40 | 14.58 | 0.44 |
| 551.6819 | 49.17  | 14.40 | 17.52 | 17.75 | 16.53 | 1.51 |
| 551.7848 | 277.38 | 12.15 | 15.52 | 14.56 | 13.76 | 0.76 |
| 551.8153 | 31.63  | 14.57 | 18.49 | 16.69 | 17.72 | 1.54 |
| 551.8889 | 28.5   | 13.43 | 18.11 | 12.94 | 17.79 | 0.82 |
| 551.9510 | 277.16 | 14.76 | 13.72 | 14.35 | 13.72 | 0.40 |
| 552.0599 | 278.52 | 15.27 | 15.43 | 14.89 | 15.25 | 0.04 |
| 552.0993 | 73.37  | 17.09 | 17.68 | 17.17 | 16.57 | 0.14 |
| 552.1723 | 278.49 | 16.45 | 21.44 | 21.36 | 19.87 | 1.72 |
| 552.2837 | 279.31 | 16.49 | 22.88 | 22.71 | 21.26 | 1.73 |
| 552.3198 | 27.41  | 13.30 | 17.83 | 13.08 | 16.65 | 0.81 |
| 552.3950 | 281.9  | 14.40 | 22.00 | 22.91 | 20.98 | 1.70 |
| 552.3978 | 26.29  | 17.31 | 17.69 | 17.00 | 17.78 | 0.15 |
| 552.5064 | 279.27 | 16.32 | 23.08 | 22.99 | 21.67 | 1.77 |
| 552.5478 | 48.6   | 17.54 | 17.61 | 17.66 | 16.94 | 0.01 |
| 552.5964 | 47.57  | 14.60 | 14.88 | 14.40 | 14.60 | 0.04 |
| 552.6177 | 279.96 | 17.46 | 22.64 | 22.51 | 21.24 | 1.72 |
| 552.6818 | 46.7   | 17.83 | 18.87 | 18.95 | 18.51 | 1.18 |
| 552.7271 | 45.82  | 12.12 | 14.86 | 15.81 | 14.81 | 1.22 |
| 552.7288 | 283.56 | 16.32 | 20.41 | 20.43 | 19.79 | 1.51 |
| 552.7738 | 48.23  | 16.06 | 18.19 | 18.12 | 18.00 | 1.33 |
| 552.8137 | 46.75  | 14.38 | 17.25 | 16.29 | 15.95 | 1.22 |
| 552.8223 | 29.79  | 9.54  | 14.99 | 10.09 | 12.55 | 0.68 |
| 552.8407 | 278.13 | 16.51 | 20.89 | 20.76 | 19.48 | 1.66 |
| 552.8928 | 48.86  | 18.45 | 17.98 | 17.87 | 17.24 | 0.41 |
| 552.9520 | 277.26 | 16.07 | 19.75 | 19.50 | 18.28 | 1.56 |
| 552.9734 | 58.57  | 16.33 | 11.09 | 13.69 | 13.18 | 1.17 |
| 553.0166 | 57.49  | 14.90 | 16.34 | 16.25 | 15.72 | 0.94 |
| 553.0630 | 278.77 | 15.95 | 18.50 | 18.49 | 17.59 | 1.29 |
| 553.1697 | 77.71  | 18.97 | 20.45 | 17.18 | 18.78 | 0.00 |
| 553.1744 | 278.37 | 12.99 | 16.70 | 15.35 | 12.45 | 0.72 |
| 553.2866 | 278.34 | 15.62 | 15.08 | 14.63 | 15.05 | 0.35 |
| 553.3288 | 27.18  | 12.30 | 18.67 | 15.57 | 17.12 | 1.56 |
| 553.4511 | 52.93  | 14.20 | 15.43 | 15.73 | 13.70 | 0.51 |
| 553.4511 | 280.53 | 12.86 | 14.40 | 14.38 | 12.90 | 0.47 |
| 553.6162 | 278.85 | 15.33 | 16.03 | 15.47 | 15.12 | 0.19 |
| 553.6792 | 49.18  | 14.13 | 17.27 | 17.41 | 16.34 | 1.55 |
| 553.7708 | 49.23  | 13.96 | 16.45 | 16.56 | 16.09 | 1.48 |
| 553.7839 | 278.61 | 13.45 | 15.13 | 14.88 | 14.91 | 0.53 |
| 553.8857 | 50.8   | 18.73 | 19.63 | 20.05 | 19.02 | 0.69 |
| 553.9502 | 279.1  | 14.36 | 14.42 | 14.45 | 14.19 | 0.01 |
| 554.0605 | 280.81 | 14.82 | 14.69 | 14.73 | 14.03 | 0.11 |
| 554.0781 | 158.54 | 11.97 | 10.53 | 13.14 | 11.21 | 0.17 |
| 554.1089 | 73.35  | 12.33 | 11.92 | 14.24 | 11.35 | 0.15 |
| 554.1722 | 76.84  | 14.68 | 17.12 | 12.10 | 14.47 | 0.04 |
| 554.1724 | 280.57 | 11.39 | 15.21 | 14.63 | 12.93 | 0.96 |
| 554.2545 | 39.85  | 17.06 | 18.15 | 15.51 | 17.71 | 0.01 |
| 554.2824 | 279.89 | 13.80 | 15.15 | 15.33 | 14.39 | 0.46 |
| 554.2869 | 33.47  | 13.72 | 14.00 | 14.69 | 12.59 | 0.08 |

|          |        |       |       |       |       |      |
|----------|--------|-------|-------|-------|-------|------|
| 554.3956 | 282.13 | 15.82 | 14.74 | 14.80 | 14.73 | 0.69 |
| 554.5446 | 47.22  | 17.98 | 18.06 | 17.98 | 17.47 | 0.04 |
| 554.6341 | 46.9   | 16.67 | 18.17 | 18.22 | 17.29 | 1.07 |
| 554.6806 | 47.05  | 16.00 | 16.99 | 16.98 | 16.80 | 1.19 |
| 554.7666 | 48.5   | 17.00 | 18.14 | 18.26 | 18.63 | 1.20 |
| 554.8893 | 48.15  | 16.35 | 16.22 | 16.90 | 14.77 | 0.04 |
| 554.9332 | 42.13  | 14.13 | 14.24 | 14.24 | 15.89 | 0.22 |
| 554.9848 | 56.12  | 16.32 | 11.89 | 10.88 | 15.37 | 1.04 |
| 555.0626 | 169.68 | 12.80 | 15.65 | 15.23 | 14.00 | 1.32 |
| 555.1671 | 76.34  | 11.20 | 13.56 | 8.41  | 11.45 | 0.03 |
| 555.3944 | 23.33  | 12.83 | 9.38  | 14.78 | 11.12 | 0.44 |
| 555.5890 | 98.37  | 9.53  | 12.30 | 13.29 | 12.12 | 1.00 |
| 555.6765 | 49.09  | 13.97 | 15.72 | 15.64 | 14.56 | 0.97 |
| 555.7648 | 49.7   | 14.91 | 17.20 | 17.32 | 16.68 | 1.49 |
| 555.8828 | 50.99  | 17.93 | 18.69 | 19.26 | 17.79 | 0.53 |
| 556.0199 | 53.71  | 16.03 | 18.63 | 18.04 | 17.30 | 1.24 |
| 556.1378 | 254.73 | 13.54 | 16.55 | 18.18 | 17.72 | 1.23 |
| 556.1710 | 292.4  | 13.94 | 14.19 | 12.78 | 13.92 | 0.14 |
| 556.2802 | 126.91 | 8.35  | 14.40 | 14.02 | 14.58 | 1.74 |
| 556.2813 | 270.52 | 13.55 | 14.55 | 15.22 | 14.99 | 0.52 |
| 556.4808 | 128.77 | 9.90  | 16.14 | 15.13 | 15.46 | 1.81 |
| 556.4809 | 269.9  | 11.31 | 15.19 | 16.02 | 15.12 | 1.22 |
| 556.4905 | 45.06  | 17.67 | 12.13 | 11.96 | 13.50 | 1.26 |
| 556.5216 | 53.44  | 13.06 | 15.90 | 14.56 | 14.54 | 0.92 |
| 556.5425 | 46.68  | 17.32 | 17.39 | 17.22 | 16.78 | 0.07 |
| 556.6316 | 46.92  | 17.57 | 19.20 | 19.21 | 18.35 | 1.00 |
| 556.6734 | 44.94  | 14.10 | 16.39 | 16.74 | 15.36 | 0.87 |
| 556.6788 | 270.8  | 13.99 | 14.22 | 15.23 | 14.36 | 0.28 |
| 556.6802 | 126.74 | 8.19  | 14.33 | 14.23 | 14.31 | 1.74 |
| 556.7515 | 49.35  | 16.94 | 12.59 | 12.40 | 12.67 | 1.26 |
| 556.7699 | 49.42  | 9.55  | 15.82 | 15.65 | 15.48 | 1.50 |
| 556.8073 | 44.05  | 12.05 | 10.95 | 14.20 | 12.09 | 0.10 |
| 556.8593 | 33.28  | 14.21 | 15.56 | 14.11 | 15.39 | 0.33 |
| 556.8818 | 134.71 | 7.82  | 13.63 | 13.38 | 12.80 | 1.64 |
| 556.9486 | 42.97  | 13.72 | 14.66 | 16.29 | 15.80 | 0.94 |
| 557.0189 | 53.77  | 14.35 | 16.85 | 15.76 | 15.76 | 1.01 |
| 557.0819 | 134.8  | 7.05  | 12.11 | 11.85 | 10.88 | 1.34 |
| 557.0948 | 43.54  | 17.55 | 18.18 | 18.76 | 18.26 | 0.73 |
| 557.1227 | 92     | 11.83 | 18.13 | 16.65 | 16.81 | 1.44 |
| 557.1412 | 252.65 | 13.12 | 16.89 | 18.81 | 17.44 | 1.51 |
| 557.7627 | 49.52  | 10.40 | 15.53 | 15.78 | 14.03 | 1.51 |
| 557.8520 | 50.32  | 16.51 | 15.31 | 15.85 | 15.13 | 0.47 |
| 557.8783 | 47.91  | 15.16 | 15.46 | 15.63 | 14.40 | 0.09 |
| 557.9604 | 145.2  | 8.95  | 13.46 | 15.13 | 12.86 | 1.57 |
| 558.0951 | 42.65  | 13.85 | 14.60 | 14.57 | 14.99 | 0.25 |
| 558.1229 | 83.12  | 16.29 | 19.72 | 18.80 | 18.20 | 1.26 |
| 558.2957 | 34.97  | 18.39 | 21.07 | 20.71 | 20.39 | 1.66 |
| 558.4876 | 44.97  | 19.54 | 15.88 | 15.74 | 15.71 | 1.18 |
| 558.5410 | 47.01  | 13.40 | 15.16 | 14.31 | 13.65 | 0.46 |
| 558.6288 | 47.87  | 17.23 | 18.93 | 18.88 | 18.34 | 1.12 |
| 558.6716 | 45.06  | 15.50 | 17.15 | 17.58 | 16.56 | 0.95 |
| 558.7166 | 46.87  | 17.04 | 18.74 | 18.75 | 18.30 | 1.16 |
| 558.7485 | 49     | 15.62 | 9.98  | 10.55 | 11.48 | 1.60 |
| 558.8455 | 45.96  | 15.82 | 17.10 | 17.76 | 17.16 | 0.87 |
| 558.8790 | 24.78  | 13.31 | 14.92 | 11.01 | 16.64 | 0.13 |
| 558.9439 | 171.66 | 8.04  | 15.00 | 13.94 | 13.27 | 1.58 |

|          |        |       |       |       |       |      |
|----------|--------|-------|-------|-------|-------|------|
| 558.9928 | 62.24  | 16.90 | 19.42 | 19.32 | 18.80 | 1.36 |
| 559.0134 | 274.87 | 14.71 | 15.95 | 16.76 | 17.08 | 0.55 |
| 559.0919 | 42.7   | 12.10 | 13.28 | 14.26 | 13.66 | 0.42 |
| 559.1289 | 89.2   | 9.05  | 14.92 | 11.69 | 12.75 | 1.04 |
| 559.2986 | 33.62  | 16.64 | 19.07 | 18.70 | 18.38 | 1.45 |
| 559.7156 | 48.38  | 14.82 | 15.62 | 15.69 | 14.54 | 0.47 |
| 559.7701 | 106.85 | 13.02 | 14.06 | 14.70 | 13.90 | 0.57 |
| 559.8484 | 50.84  | 14.18 | 14.51 | 15.92 | 14.51 | 0.38 |
| 559.9661 | 85.6   | 14.86 | 15.69 | 14.58 | 15.58 | 0.21 |
| 559.9887 | 96.27  | 11.87 | 13.42 | 13.66 | 12.40 | 0.54 |
| 560.0787 | 298.99 | 14.44 | 19.05 | 19.17 | 15.67 | 1.02 |
| 560.2951 | 36.94  | 10.83 | 13.74 | 12.92 | 13.15 | 0.71 |
| 560.3114 | 35.42  | 17.80 | 20.01 | 19.56 | 19.27 | 1.46 |
| 560.4844 | 43.2   | 19.81 | 16.50 | 16.30 | 15.67 | 0.97 |
| 560.5795 | 49.12  | 16.00 | 16.88 | 16.62 | 16.29 | 0.55 |
| 560.6281 | 47.38  | 15.72 | 17.60 | 17.47 | 16.90 | 1.20 |
| 560.6692 | 45.12  | 15.19 | 16.01 | 16.44 | 15.10 | 0.46 |
| 560.7140 | 46.96  | 16.96 | 19.19 | 19.29 | 18.76 | 1.46 |
| 560.8404 | 49.84  | 15.10 | 15.99 | 16.19 | 15.74 | 0.52 |
| 560.9879 | 42.84  | 15.18 | 16.33 | 16.18 | 16.24 | 0.89 |
| 561.0039 | 52.8   | 20.18 | 20.96 | 21.29 | 20.40 | 0.88 |
| 561.0471 | 84.58  | 14.35 | 16.19 | 15.34 | 15.30 | 0.55 |
| 561.0818 | 302.47 | 15.71 | 15.72 | 13.97 | 12.83 | 0.49 |
| 561.1229 | 82.91  | 13.57 | 14.25 | 12.85 | 13.59 | 0.03 |
| 561.1353 | 82.84  | 14.35 | 15.52 | 14.55 | 13.71 | 0.30 |
| 561.1992 | 34.25  | 13.78 | 15.41 | 14.91 | 15.42 | 0.73 |
| 561.2868 | 247.41 | 10.40 | 12.23 | 14.70 | 12.56 | 0.69 |
| 561.3147 | 34.34  | 15.42 | 17.64 | 17.29 | 16.61 | 1.03 |
| 561.5363 | 244.43 | 10.54 | 13.07 | 14.48 | 13.06 | 1.05 |
| 561.7106 | 49.24  | 13.40 | 17.01 | 17.11 | 15.91 | 1.57 |
| 561.7870 | 245.39 | 9.15  | 11.88 | 13.80 | 11.63 | 0.87 |
| 561.8684 | 85.14  | 11.78 | 15.61 | 15.16 | 14.22 | 1.16 |
| 562.0066 | 62.48  | 16.07 | 17.33 | 17.30 | 16.23 | 0.74 |
| 562.0439 | 276.72 | 15.21 | 16.10 | 15.82 | 15.65 | 0.40 |
| 562.1545 | 257.39 | 12.07 | 16.85 | 16.60 | 15.11 | 1.29 |
| 562.1691 | 274.92 | 14.38 | 16.66 | 16.09 | 15.35 | 0.90 |
| 562.2939 | 277.4  | 16.05 | 18.31 | 18.16 | 17.25 | 1.20 |
| 562.3270 | 35.81  | 19.58 | 21.62 | 21.50 | 20.96 | 1.39 |
| 562.4200 | 274.92 | 15.30 | 16.98 | 16.48 | 15.94 | 0.74 |
| 562.4825 | 45     | 19.46 | 15.79 | 15.39 | 15.74 | 1.17 |
| 562.5451 | 274.61 | 15.60 | 15.86 | 15.71 | 15.34 | 0.09 |
| 562.5771 | 48.99  | 17.57 | 18.54 | 18.46 | 17.38 | 0.44 |
| 562.6254 | 47.32  | 14.08 | 13.93 | 13.51 | 13.15 | 0.26 |
| 562.6669 | 45.16  | 11.45 | 11.12 | 11.80 | 10.51 | 0.08 |
| 562.6698 | 276.36 | 15.49 | 15.68 | 15.48 | 14.45 | 0.04 |
| 562.7126 | 47.2   | 15.15 | 18.19 | 18.34 | 17.74 | 1.64 |
| 562.7958 | 277.31 | 14.10 | 14.76 | 14.70 | 14.07 | 0.23 |
| 562.8074 | 36.16  | 15.02 | 17.27 | 17.41 | 17.60 | 1.23 |
| 562.8831 | 24.68  | 12.90 | 18.58 | 15.18 | 18.53 | 1.30 |
| 562.9996 | 52.49  | 17.48 | 18.49 | 18.98 | 17.79 | 0.80 |
| 563.0826 | 276.39 | 13.46 | 12.78 | 14.15 | 13.02 | 0.05 |
| 563.1265 | 146.53 | 7.06  | 12.80 | 11.27 | 9.86  | 1.28 |
| 563.2871 | 275.92 | 15.67 | 15.61 | 15.70 | 16.05 | 0.02 |
| 563.3305 | 36.57  | 17.29 | 19.68 | 19.59 | 18.83 | 1.44 |
| 563.3830 | 24.5   | 13.23 | 17.32 | 11.81 | 17.58 | 0.59 |
| 563.4870 | 274.58 | 14.93 | 14.08 | 14.77 | 14.43 | 0.51 |

|          |        |       |       |       |       |      |
|----------|--------|-------|-------|-------|-------|------|
| 563.7081 | 49.26  | 12.65 | 16.16 | 16.13 | 14.41 | 1.42 |
| 563.7970 | 50.19  | 14.68 | 16.52 | 16.85 | 15.94 | 1.09 |
| 563.8905 | 24.9   | 11.94 | 17.71 | 12.82 | 17.29 | 1.03 |
| 563.9135 | 53.14  | 18.45 | 18.75 | 19.01 | 16.58 | 0.03 |
| 563.9867 | 55.9   | 15.17 | 10.82 | 7.84  | 9.02  | 1.23 |
| 564.0068 | 53.96  | 14.92 | 17.45 | 17.55 | 16.22 | 1.20 |
| 564.1104 | 188.51 | 13.21 | 15.72 | 14.34 | 14.75 | 0.93 |
| 564.1401 | 82.26  | 10.01 | 13.21 | 14.05 | 12.44 | 1.25 |
| 564.2697 | 35.15  | 13.45 | 15.83 | 14.82 | 15.80 | 0.86 |
| 564.3254 | 35.6   | 13.90 | 16.47 | 16.06 | 15.73 | 1.32 |
| 564.3581 | 28.76  | 17.25 | 10.73 | 11.17 | 11.97 | 1.90 |
| 564.3932 | 24.63  | 13.89 | 16.98 | 12.29 | 16.92 | 0.50 |
| 564.4805 | 45.01  | 18.61 | 14.26 | 13.77 | 14.11 | 1.24 |
| 564.5750 | 47.88  | 17.78 | 18.50 | 18.38 | 17.80 | 0.47 |
| 564.6633 | 46.99  | 16.67 | 18.48 | 18.52 | 17.88 | 1.45 |
| 564.7126 | 47.99  | 13.47 | 14.62 | 14.98 | 15.13 | 0.84 |
| 564.7967 | 49.8   | 13.56 | 18.56 | 18.59 | 18.52 | 1.64 |
| 564.8966 | 30.36  | 11.80 | 16.38 | 11.04 | 16.15 | 0.77 |
| 564.9666 | 280.22 | 13.23 | 13.69 | 14.42 | 13.22 | 0.21 |
| 565.0082 | 49.29  | 13.89 | 15.21 | 15.57 | 14.40 | 0.66 |
| 565.0837 | 94.24  | 13.10 | 14.16 | 12.94 | 13.36 | 0.25 |
| 565.2896 | 278.57 | 15.47 | 15.63 | 14.97 | 15.07 | 0.09 |
| 565.3284 | 29.31  | 14.47 | 16.51 | 14.55 | 15.74 | 0.61 |
| 565.3987 | 24.25  | 12.25 | 14.81 | 10.24 | 15.05 | 0.32 |
| 565.6029 | 69.64  | 13.19 | 19.65 | 19.16 | 17.38 | 1.46 |
| 565.6591 | 48.38  | 14.25 | 13.51 | 13.77 | 12.78 | 0.30 |
| 565.7944 | 49.58  | 14.15 | 16.96 | 17.32 | 16.33 | 1.46 |
| 565.9102 | 51.55  | 15.94 | 13.70 | 15.15 | 12.42 | 0.53 |
| 565.9373 | 67.19  | 12.75 | 18.94 | 18.60 | 16.77 | 1.32 |
| 566.2714 | 70.41  | 11.74 | 17.26 | 16.58 | 14.08 | 0.95 |
| 566.3209 | 41.22  | 17.42 | 16.57 | 17.06 | 16.52 | 0.36 |
| 566.4562 | 53.28  | 14.90 | 16.72 | 14.25 | 15.07 | 0.26 |
| 566.4776 | 45.16  | 16.27 | 8.20  | 7.98  | 8.88  | 1.52 |
| 566.5221 | 45.3   | 17.58 | 15.59 | 14.66 | 14.82 | 0.82 |
| 566.5732 | 49.3   | 16.79 | 17.51 | 17.25 | 16.86 | 0.36 |
| 566.6607 | 46.95  | 17.47 | 19.32 | 19.34 | 18.80 | 1.50 |
| 566.6878 | 275.96 | 15.57 | 20.47 | 20.57 | 19.63 | 1.69 |
| 566.6994 | 44.48  | 15.06 | 17.08 | 17.50 | 16.59 | 1.26 |
| 566.7911 | 52.49  | 16.54 | 18.63 | 18.83 | 18.17 | 1.51 |
| 566.8886 | 276.54 | 15.17 | 21.10 | 21.32 | 20.06 | 1.66 |
| 567.0118 | 53.78  | 20.21 | 22.51 | 22.15 | 21.11 | 1.18 |
| 567.0890 | 276.05 | 15.68 | 20.65 | 21.01 | 20.02 | 1.71 |
| 567.1410 | 72.7   | 15.22 | 16.71 | 17.20 | 14.80 | 0.75 |
| 567.2897 | 275.04 | 16.26 | 19.92 | 20.25 | 19.14 | 1.61 |
| 567.4550 | 53.31  | 14.73 | 14.60 | 11.19 | 13.52 | 0.45 |
| 567.4896 | 274.44 | 13.00 | 18.23 | 18.47 | 17.15 | 1.61 |
| 567.5124 | 53.55  | 13.80 | 16.61 | 14.59 | 14.78 | 0.77 |
| 567.6556 | 48.88  | 15.26 | 16.44 | 16.53 | 15.03 | 0.46 |
| 567.6902 | 275.2  | 15.31 | 16.56 | 17.02 | 16.19 | 0.82 |
| 567.7917 | 49.65  | 10.21 | 14.30 | 14.71 | 13.78 | 1.53 |
| 567.8859 | 47.57  | 16.30 | 15.45 | 15.02 | 15.38 | 0.56 |
| 568.0119 | 52.71  | 16.79 | 19.04 | 18.65 | 17.58 | 1.14 |
| 568.0768 | 74.38  | 14.13 | 17.52 | 17.17 | 15.62 | 0.97 |
| 568.1794 | 95.77  | 11.06 | 14.06 | 11.46 | 12.70 | 0.48 |
| 568.3396 | 28.14  | 21.84 | 21.64 | 21.79 | 21.61 | 0.16 |
| 568.5206 | 45.67  | 19.40 | 18.15 | 17.72 | 17.38 | 0.78 |

|          |        |       |       |       |       |      |
|----------|--------|-------|-------|-------|-------|------|
| 568.6580 | 46.91  | 16.56 | 18.78 | 18.86 | 18.12 | 1.27 |
| 568.7001 | 44.96  | 15.48 | 17.23 | 17.76 | 16.67 | 1.13 |
| 568.7458 | 46.91  | 16.01 | 18.42 | 18.40 | 18.17 | 1.55 |
| 568.7896 | 47.71  | 16.74 | 17.76 | 18.00 | 17.03 | 0.79 |
| 568.8710 | 51.84  | 17.37 | 16.29 | 17.01 | 15.90 | 0.47 |
| 568.8723 | 268.32 | 13.05 | 15.38 | 15.46 | 14.89 | 0.95 |
| 569.0082 | 53.23  | 17.39 | 19.63 | 19.27 | 18.47 | 1.25 |
| 569.1593 | 268.89 | 14.23 | 14.69 | 15.07 | 14.37 | 0.43 |
| 569.3418 | 27.72  | 20.39 | 19.89 | 20.08 | 19.83 | 0.45 |
| 569.6530 | 48.78  | 14.22 | 16.31 | 16.15 | 15.01 | 0.79 |
| 569.7455 | 49.07  | 12.36 | 16.34 | 16.37 | 14.69 | 1.62 |
| 569.8597 | 51.12  | 18.00 | 17.20 | 17.79 | 15.84 | 0.31 |
| 570.0531 | 89.62  | 13.97 | 16.70 | 15.50 | 14.41 | 0.99 |
| 570.1100 | 145.91 | 8.24  | 12.08 | 13.27 | 11.53 | 1.45 |
| 570.1103 | 256.28 | 11.78 | 15.09 | 14.56 | 13.32 | 0.79 |
| 570.2827 | 33.92  | 18.66 | 16.52 | 16.15 | 17.68 | 1.01 |
| 570.3530 | 27.65  | 20.37 | 19.94 | 19.89 | 19.22 | 0.49 |
| 570.5182 | 45.73  | 19.59 | 18.31 | 17.99 | 17.68 | 0.84 |
| 570.6088 | 46.59  | 16.29 | 17.73 | 17.71 | 17.08 | 1.08 |
| 570.6116 | 258.72 | 10.83 | 13.40 | 13.36 | 12.01 | 0.76 |
| 570.6561 | 47.01  | 15.18 | 17.10 | 17.23 | 16.87 | 1.44 |
| 570.6976 | 44.87  | 13.95 | 15.17 | 15.93 | 14.78 | 0.85 |
| 570.7438 | 47.12  | 15.45 | 18.36 | 18.42 | 18.04 | 1.58 |
| 570.7827 | 46.92  | 12.54 | 13.89 | 13.66 | 13.87 | 0.58 |
| 570.7941 | 45.84  | 15.39 | 15.27 | 14.89 | 15.26 | 0.13 |
| 570.8004 | 275.89 | 14.84 | 14.15 | 14.51 | 14.36 | 0.26 |
| 570.8743 | 38.11  | 14.59 | 15.99 | 14.76 | 16.96 | 0.48 |
| 571.2429 | 33.14  | 12.64 | 14.02 | 12.13 | 15.08 | 0.33 |
| 571.2863 | 33.59  | 15.83 | 10.58 | 11.12 | 15.30 | 1.18 |
| 571.3018 | 268.02 | 15.19 | 14.41 | 15.26 | 14.79 | 0.22 |
| 571.3581 | 27.17  | 18.74 | 17.73 | 18.00 | 17.24 | 0.73 |
| 571.6505 | 48.87  | 13.07 | 14.46 | 14.41 | 12.61 | 0.45 |
| 571.7393 | 49.38  | 11.74 | 17.01 | 17.19 | 15.80 | 1.69 |
| 571.8562 | 50.04  | 17.74 | 16.62 | 16.76 | 14.55 | 0.51 |
| 571.9944 | 54.35  | 14.86 | 13.37 | 15.18 | 13.41 | 0.45 |
| 572.2978 | 277.18 | 14.69 | 14.28 | 14.01 | 14.69 | 0.18 |
| 572.2985 | 33.55  | 17.36 | 14.71 | 13.81 | 15.70 | 1.26 |
| 572.3710 | 27.05  | 19.33 | 18.44 | 18.49 | 18.12 | 0.74 |
| 572.5155 | 45.77  | 19.03 | 17.42 | 17.23 | 17.00 | 0.82 |
| 572.5168 | 273.74 | 12.70 | 13.91 | 14.41 | 12.87 | 0.42 |
| 572.6064 | 46.65  | 16.80 | 18.95 | 18.92 | 17.53 | 0.72 |
| 572.7271 | 49.19  | 15.16 | 6.76  | 6.83  | 7.65  | 1.85 |
| 572.7436 | 47.95  | 13.87 | 16.45 | 16.50 | 16.50 | 1.57 |
| 572.7998 | 279    | 14.65 | 14.25 | 13.87 | 14.34 | 0.29 |
| 572.8348 | 29.58  | 12.66 | 16.26 | 16.16 | 15.95 | 1.19 |
| 573.0661 | 57.45  | 10.55 | 13.91 | 12.13 | 13.67 | 0.73 |
| 573.0867 | 93.51  | 14.10 | 14.25 | 13.91 | 13.34 | 0.06 |
| 573.1518 | 98.34  | 9.25  | 13.97 | 10.09 | 14.40 | 0.76 |
| 573.3745 | 27.13  | 17.24 | 15.27 | 15.23 | 13.73 | 0.70 |
| 573.7371 | 49.28  | 13.48 | 15.41 | 15.73 | 14.45 | 1.23 |
| 573.8280 | 43.59  | 16.02 | 16.36 | 17.09 | 16.19 | 0.44 |
| 574.0097 | 84.69  | 11.32 | 17.40 | 18.20 | 15.87 | 1.63 |
| 574.0855 | 72     | 14.56 | 14.43 | 12.91 | 12.01 | 0.34 |
| 574.2930 | 271.44 | 14.97 | 17.48 | 20.23 | 17.93 | 1.25 |
| 574.3140 | 34.68  | 16.52 | 12.77 | 11.95 | 14.17 | 1.29 |
| 574.4436 | 53.19  | 14.45 | 17.09 | 16.76 | 15.65 | 0.91 |



|          |        |       |       |       |       |      |
|----------|--------|-------|-------|-------|-------|------|
| 574.4779 | 273.69 | 15.45 | 14.51 | 15.09 | 15.33 | 0.45 |
| 574.4933 | 269    | 16.48 | 18.03 | 20.92 | 18.47 | 1.07 |
| 574.5131 | 46.03  | 17.49 | 15.36 | 14.55 | 15.21 | 0.89 |
| 574.6045 | 46.77  | 17.26 | 18.69 | 18.64 | 18.26 | 0.98 |
| 574.6557 | 47.44  | 9.35  | 10.98 | 12.67 | 11.05 | 0.86 |
| 574.6936 | 272.41 | 15.05 | 17.08 | 19.86 | 17.75 | 1.09 |
| 574.6943 | 47.43  | 16.05 | 17.95 | 17.93 | 17.80 | 1.27 |
| 574.8266 | 43.29  | 12.83 | 16.94 | 17.25 | 16.22 | 1.42 |
| 574.8905 | 275.01 | 14.32 | 16.81 | 19.60 | 17.17 | 1.11 |
| 574.9824 | 42.75  | 11.92 | 15.67 | 17.45 | 15.69 | 1.53 |
| 575.0001 | 56.74  | 15.00 | 18.01 | 18.18 | 16.17 | 1.02 |
| 575.0948 | 265.22 | 15.72 | 15.28 | 17.89 | 16.11 | 0.37 |
| 575.1250 | 41.05  | 20.02 | 18.80 | 19.56 | 19.85 | 0.50 |
| 575.2959 | 266.85 | 15.83 | 14.57 | 16.21 | 15.13 | 0.28 |
| 575.3872 | 24.2   | 8.28  | 16.31 | 8.19  | 16.44 | 0.93 |
| 575.4415 | 52.49  | 13.23 | 16.40 | 15.11 | 13.75 | 0.62 |
| 575.5027 | 173.79 | 15.10 | 12.28 | 12.15 | 12.85 | 0.98 |
| 575.8225 | 49.95  | 14.11 | 15.92 | 16.69 | 15.26 | 1.07 |
| 575.9946 | 53.99  | 14.21 | 17.40 | 16.98 | 15.13 | 0.95 |
| 576.1280 | 41.44  | 17.62 | 15.32 | 16.29 | 16.95 | 0.67 |
| 576.3966 | 24.41  | 13.46 | 15.63 | 10.66 | 16.24 | 0.13 |
| 576.4703 | 265.38 | 15.24 | 13.38 | 14.39 | 13.85 | 0.56 |
| 576.5068 | 53.49  | 16.12 | 13.90 | 14.25 | 14.98 | 0.62 |
| 576.5515 | 50.5   | 18.04 | 17.07 | 16.45 | 16.74 | 0.58 |
| 576.6029 | 46.96  | 15.41 | 17.55 | 17.36 | 16.84 | 1.05 |
| 576.6384 | 266.32 | 15.18 | 13.93 | 14.84 | 14.74 | 0.29 |
| 576.6908 | 47.47  | 16.79 | 18.97 | 19.08 | 18.90 | 1.57 |
| 576.7291 | 44.44  | 14.28 | 17.20 | 17.64 | 16.92 | 1.31 |
| 576.8075 | 267.12 | 15.85 | 14.84 | 15.08 | 15.44 | 0.36 |
| 576.8208 | 44.1   | 14.07 | 17.31 | 17.67 | 16.49 | 1.18 |
| 576.8963 | 24.58  | 12.45 | 14.76 | 10.18 | 15.87 | 0.26 |
| 576.9729 | 265.48 | 14.71 | 14.56 | 15.40 | 15.12 | 0.09 |
| 576.9766 | 54.97  | 18.72 | 16.68 | 17.88 | 16.84 | 0.76 |
| 577.3038 | 277.33 | 16.34 | 14.79 | 14.89 | 15.33 | 0.61 |
| 577.3616 | 56.21  | 13.42 | 14.05 | 13.20 | 12.96 | 0.07 |
| 577.5193 | 135.72 | 15.15 | 12.61 | 12.74 | 13.89 | 1.06 |
| 577.6875 | 49.66  | 10.70 | 15.14 | 14.53 | 13.02 | 1.09 |
| 577.8711 | 82.5   | 11.38 | 15.08 | 13.59 | 12.96 | 0.81 |
| 577.9107 | 49.23  | 18.31 | 16.48 | 13.78 | 15.23 | 1.00 |
| 577.9669 | 304.87 | 14.49 | 15.20 | 14.32 | 12.04 | 0.04 |
| 578.0019 | 53.74  | 16.43 | 19.14 | 18.24 | 17.38 | 0.96 |
| 578.0511 | 277.81 | 15.26 | 15.47 | 15.70 | 14.48 | 0.06 |
| 578.1762 | 278.32 | 15.43 | 18.05 | 17.77 | 16.91 | 1.10 |
| 578.3016 | 278.81 | 16.01 | 18.47 | 18.41 | 17.47 | 1.10 |
| 578.4268 | 278.47 | 15.69 | 18.35 | 18.17 | 17.01 | 1.10 |
| 578.5032 | 53.48  | 10.92 | 16.66 | 13.73 | 14.42 | 1.11 |
| 578.5512 | 275.6  | 11.75 | 15.96 | 15.95 | 15.36 | 1.16 |
| 578.5517 | 48.37  | 18.75 | 18.74 | 18.50 | 17.64 | 0.10 |
| 578.6787 | 277.44 | 15.32 | 16.14 | 16.00 | 15.38 | 0.40 |
| 578.6874 | 46.95  | 15.41 | 18.10 | 18.28 | 17.85 | 1.60 |
| 578.7292 | 45.25  | 14.88 | 16.95 | 17.40 | 16.62 | 1.38 |
| 578.7839 | 35.32  | 15.09 | 17.27 | 17.57 | 17.26 | 1.22 |
| 578.8024 | 276.72 | 15.59 | 15.17 | 15.12 | 14.78 | 0.26 |
| 578.8197 | 46.61  | 15.20 | 14.99 | 15.04 | 14.45 | 0.16 |
| 578.9052 | 50.11  | 17.21 | 17.06 | 16.50 | 16.80 | 0.28 |
| 578.9709 | 54.57  | 15.49 | 11.32 | 13.65 | 11.40 | 0.75 |

|          |        |       |       |       |       |      |
|----------|--------|-------|-------|-------|-------|------|
| 579.0005 | 53.97  | 14.02 | 17.19 | 16.02 | 15.61 | 0.96 |
| 579.0739 | 198.53 | 15.35 | 18.93 | 18.33 | 17.39 | 1.63 |
| 579.4745 | 266.52 | 15.69 | 16.75 | 17.69 | 16.57 | 0.85 |
| 579.6756 | 264.46 | 15.97 | 16.93 | 17.53 | 16.41 | 0.68 |
| 579.6842 | 49.45  | 13.33 | 12.94 | 12.69 | 12.78 | 0.23 |
| 579.7718 | 49.48  | 13.10 | 16.00 | 16.32 | 14.93 | 1.49 |
| 579.8752 | 266.29 | 15.79 | 16.79 | 17.55 | 16.40 | 0.81 |
| 579.8929 | 51.87  | 17.58 | 19.18 | 19.28 | 18.51 | 1.20 |
| 580.0148 | 282.87 | 15.49 | 16.29 | 15.97 | 15.40 | 0.31 |
| 580.0758 | 264.19 | 15.31 | 14.37 | 15.38 | 14.50 | 0.32 |
| 580.1022 | 62.73  | 17.98 | 18.59 | 18.94 | 17.79 | 0.42 |
| 580.2086 | 138.86 | 9.52  | 12.74 | 11.16 | 11.61 | 0.72 |
| 580.2920 | 23.3   | 15.86 | 19.02 | 18.00 | 18.00 | 1.16 |
| 580.5494 | 47.54  | 19.25 | 18.84 | 18.56 | 18.12 | 0.35 |
| 580.6387 | 46.61  | 16.17 | 18.19 | 18.18 | 17.67 | 1.42 |
| 580.6885 | 47.79  | 12.51 | 14.40 | 15.51 | 14.76 | 0.96 |
| 580.7702 | 48.86  | 15.07 | 18.22 | 18.41 | 18.28 | 1.82 |
| 580.9002 | 52.27  | 15.85 | 15.16 | 15.05 | 15.68 | 0.34 |
| 581.1057 | 63.58  | 13.93 | 13.42 | 14.33 | 13.17 | 0.10 |
| 581.1622 | 151.56 | 7.84  | 12.45 | 14.55 | 12.08 | 1.65 |
| 581.1770 | 307.09 | 14.60 | 17.37 | 17.25 | 17.04 | 1.81 |
| 581.6785 | 307.04 | 14.07 | 15.44 | 15.44 | 14.86 | 0.91 |
| 581.7684 | 49.51  | 12.89 | 16.69 | 16.83 | 15.39 | 1.62 |
| 581.8918 | 51.12  | 15.98 | 18.63 | 18.57 | 17.80 | 1.35 |
| 581.9712 | 143.23 | 10.90 | 16.07 | 14.79 | 14.00 | 1.23 |
| 582.2954 | 35.02  | 17.10 | 19.60 | 18.85 | 18.94 | 1.25 |
| 582.4302 | 51.4   | 14.90 | 16.48 | 16.31 | 14.58 | 0.61 |
| 582.5469 | 48.53  | 18.61 | 19.10 | 18.38 | 18.84 | 0.11 |
| 582.6365 | 46.78  | 17.34 | 19.10 | 19.09 | 18.71 | 1.35 |
| 582.7622 | 49.7   | 15.20 | 18.08 | 18.37 | 17.33 | 1.47 |
| 582.8624 | 53.87  | 16.48 | 13.76 | 12.52 | 13.63 | 1.00 |
| 582.9559 | 252.49 | 11.54 | 15.52 | 16.96 | 15.76 | 1.11 |
| 582.9855 | 52.62  | 19.69 | 20.94 | 21.27 | 19.99 | 1.02 |
| 582.9910 | 255.42 | 15.42 | 15.80 | 16.09 | 15.61 | 0.19 |
| 583.2990 | 35     | 14.30 | 17.16 | 16.72 | 16.91 | 1.17 |
| 583.4289 | 52.56  | 14.42 | 15.72 | 15.61 | 13.60 | 0.44 |
| 583.6308 | 48.8   | 14.80 | 14.50 | 14.31 | 13.81 | 0.20 |
| 583.7657 | 49.41  | 13.64 | 13.71 | 13.62 | 12.82 | 0.06 |
| 583.8552 | 51.33  | 16.02 | 14.76 | 15.43 | 15.30 | 0.51 |
| 583.8896 | 45.6   | 13.17 | 15.50 | 14.90 | 15.48 | 1.00 |
| 583.9867 | 53.31  | 16.06 | 17.29 | 17.63 | 15.89 | 0.71 |
| 584.0491 | 68.8   | 14.34 | 14.14 | 13.04 | 13.75 | 0.29 |
| 584.1589 | 122.57 | 12.55 | 12.41 | 11.07 | 12.60 | 0.36 |
| 584.2387 | 34.84  | 12.88 | 14.90 | 14.28 | 15.67 | 0.93 |
| 584.4988 | 46.51  | 16.60 | 14.99 | 14.97 | 14.08 | 0.86 |
| 584.5443 | 47.23  | 16.79 | 15.87 | 14.60 | 15.57 | 0.56 |
| 584.6350 | 46.93  | 16.65 | 18.67 | 18.58 | 18.11 | 1.18 |
| 584.7280 | 46.5   | 15.75 | 18.19 | 18.06 | 17.96 | 1.45 |
| 584.7588 | 49.84  | 14.45 | 17.23 | 17.35 | 15.74 | 1.21 |
| 584.8044 | 265.59 | 12.96 | 13.90 | 15.07 | 14.58 | 0.55 |
| 584.8472 | 51.33  | 15.79 | 16.78 | 17.02 | 16.32 | 0.66 |
| 584.9721 | 265.57 | 15.14 | 14.67 | 15.55 | 14.89 | 0.06 |
| 584.9823 | 53.08  | 17.18 | 18.50 | 18.87 | 17.48 | 1.00 |
| 585.0627 | 85.13  | 11.47 | 17.03 | 14.99 | 14.56 | 1.29 |
| 585.1393 | 264.25 | 13.95 | 14.77 | 15.79 | 14.79 | 0.61 |
| 585.3062 | 269.66 | 15.48 | 14.75 | 15.74 | 15.60 | 0.13 |

|          |        |       |       |       |       |      |
|----------|--------|-------|-------|-------|-------|------|
| 585.5546 | 54.89  | 15.91 | 19.86 | 18.86 | 19.24 | 1.28 |
| 585.6276 | 47.19  | 14.65 | 14.44 | 13.80 | 12.70 | 0.24 |
| 585.8360 | 52.68  | 17.43 | 12.72 | 14.41 | 13.83 | 1.23 |
| 585.9884 | 55.74  | 16.45 | 18.81 | 18.73 | 17.01 | 1.01 |
| 586.0566 | 69.77  | 13.99 | 18.44 | 17.57 | 17.63 | 1.40 |
| 586.3090 | 49.29  | 11.56 | 12.65 | 14.50 | 14.12 | 0.57 |
| 586.4938 | 50.06  | 17.35 | 17.78 | 17.44 | 16.59 | 0.08 |
| 586.5532 | 54.39  | 14.54 | 18.64 | 17.37 | 18.14 | 1.19 |
| 586.5831 | 45.8   | 17.97 | 18.16 | 17.75 | 17.74 | 0.02 |
| 586.6334 | 47.3   | 15.18 | 16.99 | 16.67 | 16.64 | 0.95 |
| 586.7203 | 48.9   | 15.70 | 18.09 | 18.24 | 18.49 | 1.51 |
| 586.7575 | 43.89  | 13.75 | 17.96 | 18.17 | 17.85 | 1.85 |
| 586.8500 | 37.15  | 14.72 | 17.37 | 17.73 | 16.80 | 1.34 |
| 586.8844 | 26.14  | 9.06  | 13.09 | 9.10  | 14.40 | 0.68 |
| 586.9876 | 53.52  | 14.92 | 17.20 | 17.11 | 15.47 | 0.92 |
| 587.0547 | 62.04  | 12.72 | 15.52 | 14.36 | 15.58 | 0.84 |
| 587.0557 | 276.7  | 13.71 | 16.07 | 15.99 | 15.20 | 0.79 |
| 587.1748 | 74.88  | 13.66 | 15.90 | 15.61 | 14.31 | 0.53 |
| 587.1807 | 274.42 | 14.72 | 15.61 | 15.70 | 14.80 | 0.34 |
| 587.3074 | 272.14 | 15.62 | 16.23 | 16.12 | 15.93 | 0.29 |
| 587.4318 | 276.93 | 15.36 | 15.96 | 15.65 | 15.01 | 0.20 |
| 587.4507 | 268.95 | 14.91 | 14.64 | 15.22 | 14.67 | 0.03 |
| 587.5528 | 55.35  | 8.92  | 14.22 | 11.93 | 14.04 | 0.94 |
| 587.5564 | 278.55 | 14.23 | 15.66 | 15.27 | 15.10 | 0.55 |
| 587.7188 | 49.38  | 12.88 | 14.53 | 14.24 | 14.01 | 0.66 |
| 587.8310 | 50.75  | 16.65 | 11.79 | 12.37 | 12.00 | 1.42 |
| 587.8939 | 29.84  | 12.30 | 17.02 | 12.33 | 16.69 | 0.94 |
| 588.1097 | 298.34 | 14.69 | 19.10 | 18.08 | 16.90 | 1.16 |
| 588.1730 | 79.88  | 12.57 | 14.85 | 12.93 | 11.77 | 0.43 |
| 588.4010 | 24.69  | 12.79 | 14.59 | 10.96 | 14.02 | 0.13 |
| 588.4933 | 46.65  | 16.79 | 15.64 | 15.16 | 14.34 | 0.83 |
| 588.5808 | 46.02  | 18.89 | 19.38 | 19.16 | 18.86 | 0.24 |
| 588.6812 | 278.91 | 15.00 | 15.23 | 15.08 | 14.46 | 0.04 |
| 588.7202 | 47.59  | 14.14 | 16.39 | 16.76 | 16.64 | 1.24 |
| 588.7561 | 43.42  | 10.06 | 16.11 | 16.21 | 15.55 | 1.68 |
| 588.8070 | 278.11 | 12.76 | 14.87 | 14.85 | 14.33 | 0.74 |
| 588.8077 | 29.48  | 13.79 | 17.77 | 17.62 | 16.65 | 1.33 |
| 588.8543 | 41.67  | 13.55 | 16.27 | 15.42 | 15.08 | 1.27 |
| 588.9314 | 54.49  | 19.25 | 18.16 | 17.58 | 16.66 | 0.60 |
| 588.9325 | 278.16 | 14.08 | 13.84 | 14.95 | 13.34 | 0.03 |
| 588.9939 | 54.06  | 20.23 | 22.38 | 21.97 | 21.09 | 1.14 |
| 589.3080 | 279.27 | 15.84 | 14.24 | 14.68 | 15.19 | 0.73 |
| 589.4915 | 46.55  | 14.77 | 16.44 | 14.20 | 14.49 | 0.19 |
| 589.6010 | 268.77 | 14.57 | 13.42 | 14.86 | 13.92 | 0.25 |
| 589.8070 | 35.13  | 12.23 | 14.85 | 16.18 | 14.48 | 1.00 |
| 589.9263 | 53.05  | 17.10 | 18.14 | 17.74 | 17.26 | 0.49 |
| 589.9882 | 172.33 | 9.26  | 10.39 | 13.39 | 12.45 | 0.61 |
| 590.0592 | 73.69  | 15.26 | 16.34 | 15.79 | 14.75 | 0.30 |
| 590.1137 | 56.54  | 12.80 | 16.55 | 14.70 | 16.82 | 0.94 |
| 590.3078 | 273.88 | 15.11 | 14.53 | 14.69 | 14.93 | 0.23 |
| 590.4198 | 36.29  | 13.85 | 13.71 | 13.47 | 12.65 | 0.11 |
| 590.4910 | 46.55  | 16.05 | 14.32 | 13.31 | 13.07 | 1.00 |
| 590.5788 | 46.16  | 18.91 | 19.20 | 19.00 | 18.74 | 0.13 |
| 590.6685 | 46.92  | 15.71 | 18.16 | 18.24 | 17.89 | 1.45 |
| 590.8005 | 37.5   | 11.82 | 15.95 | 16.04 | 14.87 | 1.41 |
| 590.9762 | 56.26  | 11.28 | 10.51 | 13.11 | 10.63 | 0.06 |

|          |        |       |       |       |       |      |
|----------|--------|-------|-------|-------|-------|------|
| 590.9894 | 53.54  | 17.65 | 19.52 | 19.06 | 18.40 | 1.12 |
| 591.1206 | 70.71  | 8.63  | 12.57 | 11.02 | 12.13 | 0.90 |
| 591.3093 | 278.99 | 15.53 | 14.61 | 14.84 | 15.17 | 0.43 |
| 591.4979 | 22.79  | 15.77 | 8.47  | 8.84  | 10.67 | 1.43 |
| 591.7964 | 42.82  | 12.51 | 14.61 | 15.51 | 14.12 | 1.05 |
| 591.9224 | 50.11  | 15.63 | 16.44 | 15.14 | 15.30 | 0.08 |
| 591.9670 | 54.2   | 12.93 | 12.78 | 13.32 | 10.84 | 0.07 |
| 592.2102 | 39.62  | 16.13 | 18.99 | 16.23 | 18.12 | 0.48 |
| 592.3070 | 279.3  | 15.85 | 15.40 | 15.33 | 15.54 | 0.26 |
| 592.3180 | 280.75 | 15.61 | 14.75 | 14.90 | 14.80 | 0.40 |
| 592.5764 | 46.26  | 18.00 | 18.12 | 17.88 | 17.79 | 0.02 |
| 592.6668 | 47.16  | 16.66 | 18.73 | 18.82 | 18.50 | 1.44 |
| 592.7083 | 281.55 | 16.27 | 14.99 | 14.54 | 14.76 | 0.71 |
| 592.7904 | 50.27  | 12.33 | 16.19 | 15.66 | 14.54 | 1.35 |
| 592.8083 | 273.78 | 13.14 | 16.10 | 15.92 | 15.18 | 0.99 |
| 592.9148 | 39.17  | 12.06 | 14.18 | 13.43 | 12.99 | 0.67 |
| 592.9314 | 276.99 | 15.51 | 17.92 | 17.66 | 16.82 | 0.95 |
| 593.0591 | 273.94 | 15.42 | 16.30 | 16.14 | 15.81 | 0.43 |
| 593.1123 | 83.23  | 10.22 | 14.65 | 14.20 | 13.76 | 1.19 |
| 593.1573 | 288.04 | 16.52 | 13.93 | 14.31 | 14.68 | 1.06 |
| 593.1843 | 273.55 | 15.94 | 15.82 | 15.92 | 15.17 | 0.12 |
| 593.2136 | 39.62  | 12.60 | 15.70 | 12.06 | 14.76 | 0.33 |
| 593.3048 | 263.07 | 15.60 | 16.32 | 17.73 | 17.40 | 0.62 |
| 593.5137 | 22.91  | 16.08 | 7.42  | 7.50  | 9.22  | 1.73 |
| 593.5425 | 56.16  | 12.65 | 16.01 | 14.65 | 16.82 | 0.71 |
| 593.5494 | 252.04 | 10.48 | 15.54 | 17.66 | 15.72 | 1.38 |
| 593.6670 | 49.43  | 13.86 | 14.68 | 14.75 | 14.72 | 0.50 |
| 593.7056 | 265.57 | 16.17 | 16.64 | 19.36 | 17.51 | 0.75 |
| 593.7999 | 254.22 | 15.12 | 14.62 | 17.39 | 16.88 | 0.45 |
| 593.8840 | 54.96  | 18.00 | 15.16 | 13.57 | 14.40 | 1.12 |
| 593.9059 | 273.14 | 15.93 | 17.74 | 20.22 | 18.47 | 1.12 |
| 593.9766 | 53.17  | 14.73 | 17.39 | 17.83 | 15.57 | 0.97 |
| 594.0538 | 268.04 | 14.89 | 18.48 | 18.71 | 17.33 | 1.22 |
| 594.0848 | 245.76 | 9.56  | 14.05 | 13.35 | 12.76 | 1.16 |
| 594.1068 | 266.24 | 16.44 | 17.39 | 20.10 | 18.07 | 0.95 |
| 594.1839 | 277.03 | 16.18 | 19.54 | 19.67 | 18.40 | 1.38 |
| 594.3082 | 274.91 | 16.58 | 20.33 | 21.01 | 19.48 | 1.42 |
| 594.4340 | 279.63 | 15.71 | 20.08 | 20.11 | 18.85 | 1.43 |
| 594.5074 | 246.79 | 14.42 | 14.78 | 17.58 | 15.59 | 0.72 |
| 594.5339 | 51.45  | 16.72 | 17.68 | 17.32 | 17.39 | 0.35 |
| 594.5604 | 279.12 | 16.16 | 19.08 | 19.28 | 18.04 | 1.22 |
| 594.5757 | 46.51  | 12.14 | 15.09 | 13.32 | 14.21 | 0.47 |
| 594.6653 | 47.31  | 15.87 | 18.05 | 18.15 | 17.88 | 1.36 |
| 594.6848 | 279.9  | 15.68 | 18.09 | 18.05 | 16.70 | 0.95 |
| 594.7082 | 248.25 | 11.46 | 12.94 | 15.08 | 13.13 | 0.66 |
| 594.7556 | 46.05  | 14.07 | 16.81 | 16.65 | 16.85 | 0.94 |
| 594.8106 | 276    | 15.79 | 16.41 | 16.37 | 16.11 | 0.35 |
| 594.8769 | 52.16  | 16.97 | 17.03 | 17.18 | 16.78 | 0.06 |
| 594.9359 | 277.06 | 15.60 | 16.03 | 15.78 | 15.59 | 0.15 |
| 594.9749 | 53.28  | 14.28 | 15.56 | 16.36 | 13.89 | 0.53 |
| 595.0454 | 55.4   | 11.43 | 14.90 | 11.69 | 14.43 | 0.63 |
| 595.1050 | 186.83 | 8.12  | 14.75 | 15.03 | 11.82 | 1.71 |
| 595.1538 | 76.58  | 12.80 | 14.75 | 10.95 | 13.89 | 0.10 |
| 595.2421 | 32.42  | 14.35 | 16.92 | 16.84 | 17.75 | 1.46 |
| 595.3137 | 278.5  | 15.55 | 14.93 | 14.81 | 14.98 | 0.34 |
| 595.4361 | 52.51  | 13.68 | 13.15 | 11.17 | 13.50 | 0.47 |

|          |        |       |       |       |       |      |
|----------|--------|-------|-------|-------|-------|------|
| 595.6634 | 49.64  | 8.87  | 14.68 | 14.43 | 13.44 | 1.43 |
| 595.7474 | 49.56  | 11.65 | 12.11 | 11.88 | 12.58 | 0.16 |
| 595.8697 | 51.06  | 17.27 | 19.41 | 19.50 | 18.39 | 1.19 |
| 596.0710 | 64.28  | 15.30 | 15.72 | 17.48 | 15.62 | 0.44 |
| 596.1706 | 301.43 | 15.82 | 18.29 | 18.59 | 17.01 | 1.40 |
| 596.3105 | 280.68 | 15.46 | 14.61 | 14.95 | 14.89 | 0.37 |
| 596.4345 | 52.25  | 11.65 | 12.59 | 10.35 | 12.97 | 0.05 |
| 596.5351 | 51.5   | 16.53 | 19.35 | 18.98 | 17.79 | 0.79 |
| 596.5464 | 54.4   | 14.20 | 18.80 | 18.18 | 17.90 | 1.53 |
| 596.6127 | 46.5   | 17.05 | 18.75 | 18.51 | 17.99 | 0.72 |
| 596.6648 | 47.27  | 13.73 | 15.85 | 16.00 | 16.06 | 1.03 |
| 596.6711 | 302.29 | 14.55 | 16.65 | 17.03 | 15.68 | 1.03 |
| 596.7472 | 47.82  | 15.19 | 17.80 | 17.98 | 18.16 | 1.49 |
| 596.8782 | 47.63  | 16.09 | 17.90 | 17.95 | 18.25 | 1.22 |
| 596.9820 | 70.93  | 15.74 | 19.39 | 18.87 | 17.98 | 1.18 |
| 597.0471 | 54.28  | 14.41 | 16.52 | 15.67 | 15.94 | 0.93 |
| 597.1734 | 302.81 | 14.33 | 14.79 | 15.23 | 14.46 | 0.29 |
| 597.3116 | 275.75 | 16.31 | 15.60 | 15.66 | 16.23 | 0.29 |
| 597.3164 | 108.8  | 8.26  | 17.27 | 16.06 | 16.27 | 1.88 |
| 597.4399 | 279.4  | 15.76 | 14.81 | 14.80 | 14.94 | 0.48 |
| 597.4814 | 52.46  | 13.37 | 16.77 | 15.58 | 15.39 | 0.83 |
| 597.5447 | 54.24  | 13.38 | 17.32 | 16.24 | 16.18 | 1.21 |
| 597.6519 | 107.78 | 9.95  | 15.21 | 14.44 | 14.48 | 1.75 |
| 597.8684 | 49.48  | 16.71 | 19.08 | 19.20 | 18.54 | 1.48 |
| 597.9659 | 253.71 | 11.86 | 16.35 | 12.55 | 15.13 | 0.65 |
| 597.9792 | 53.19  | 15.74 | 17.59 | 17.26 | 16.26 | 0.90 |
| 597.9860 | 112    | 12.35 | 13.00 | 12.97 | 12.69 | 0.30 |
| 598.0450 | 57     | 11.47 | 13.24 | 11.73 | 12.43 | 0.34 |
| 598.3113 | 281.33 | 16.28 | 14.79 | 14.77 | 15.35 | 0.59 |
| 598.4820 | 46.11  | 13.95 | 12.43 | 11.27 | 12.29 | 0.56 |
| 598.5269 | 48.99  | 16.78 | 16.32 | 16.36 | 16.00 | 0.30 |
| 598.6103 | 46.11  | 18.36 | 19.67 | 19.48 | 19.09 | 0.76 |
| 598.7413 | 49.3   | 15.92 | 17.03 | 17.14 | 17.06 | 0.78 |
| 598.8034 | 279.68 | 16.02 | 14.48 | 14.72 | 15.17 | 0.62 |
| 598.8801 | 43.39  | 10.84 | 14.04 | 13.78 | 15.26 | 1.03 |
| 598.9585 | 52.9   | 18.51 | 18.01 | 18.83 | 17.49 | 0.18 |
| 599.1654 | 304.8  | 13.64 | 15.29 | 14.73 | 15.25 | 0.61 |
| 599.3138 | 279.68 | 16.88 | 15.17 | 15.29 | 15.72 | 0.67 |
| 599.4390 | 28.29  | 17.42 | 18.90 | 18.13 | 17.59 | 0.55 |
| 599.5034 | 24     | 16.44 | 11.25 | 12.53 | 14.01 | 1.24 |
| 599.6672 | 306.51 | 14.62 | 13.36 | 13.05 | 13.63 | 0.71 |
| 599.7312 | 44.41  | 13.65 | 12.02 | 11.94 | 12.72 | 0.65 |
| 599.8297 | 51.54  | 14.39 | 10.90 | 13.52 | 11.94 | 0.67 |
| 599.8641 | 50.7   | 14.15 | 17.08 | 16.95 | 15.69 | 1.48 |
| 599.9003 | 36.24  | 12.57 | 15.22 | 10.33 | 15.28 | 0.23 |
| 599.9109 | 268.11 | 15.68 | 14.91 | 15.37 | 14.92 | 0.31 |
| 599.9528 | 57.31  | 19.21 | 19.52 | 18.51 | 17.90 | 0.17 |
| 599.9848 | 53.61  | 16.37 | 18.81 | 17.49 | 17.08 | 0.80 |
| 600.0721 | 163.62 | 6.63  | 11.06 | 10.91 | 9.82  | 1.22 |
| 600.1129 | 265.24 | 16.70 | 15.42 | 15.99 | 15.80 | 0.47 |
| 600.1573 | 285.29 | 16.23 | 14.87 | 13.85 | 15.06 | 0.49 |
| 600.1968 | 281.67 | 16.24 | 15.16 | 14.08 | 15.34 | 0.43 |
| 600.2376 | 283.08 | 15.92 | 14.84 | 13.16 | 15.16 | 0.45 |
| 600.3136 | 266.88 | 16.72 | 15.46 | 15.74 | 15.97 | 0.51 |
| 600.3240 | 55.45  | 11.01 | 13.38 | 13.34 | 12.83 | 0.76 |
| 600.4006 | 25.27  | 10.10 | 15.05 | 9.44  | 15.79 | 0.61 |

|          |        |       |       |       |       |      |
|----------|--------|-------|-------|-------|-------|------|
| 600.4425 | 29.25  | 15.17 | 14.24 | 13.19 | 13.69 | 0.60 |
| 600.4805 | 49.66  | 14.70 | 16.22 | 13.99 | 14.37 | 0.12 |
| 600.5137 | 266.96 | 9.97  | 13.72 | 14.95 | 12.47 | 0.92 |
| 600.5222 | 44.2   | 15.24 | 13.38 | 12.74 | 13.90 | 0.73 |
| 600.6078 | 46.19  | 18.10 | 19.27 | 19.11 | 18.85 | 0.83 |
| 600.6575 | 46.36  | 9.52  | 11.05 | 12.52 | 10.18 | 0.65 |
| 600.6983 | 46.92  | 15.49 | 17.83 | 18.04 | 17.85 | 1.18 |
| 600.7329 | 49.72  | 14.88 | 15.49 | 15.15 | 13.60 | 0.08 |
| 600.8081 | 279.39 | 15.43 | 14.29 | 14.54 | 14.64 | 0.48 |
| 600.8226 | 51.19  | 15.01 | 15.83 | 15.89 | 14.60 | 0.34 |
| 600.9555 | 51.09  | 17.79 | 16.64 | 17.65 | 15.47 | 0.49 |
| 600.9831 | 53.88  | 13.50 | 17.10 | 13.86 | 14.84 | 0.61 |
| 601.0559 | 190.42 | 6.88  | 14.15 | 14.60 | 12.94 | 1.78 |
| 601.1115 | 289.14 | 14.73 | 16.64 | 17.62 | 16.46 | 0.89 |
| 601.3085 | 278.63 | 15.57 | 14.10 | 14.79 | 15.07 | 0.63 |
| 601.3180 | 277.65 | 16.20 | 14.42 | 14.74 | 15.15 | 0.89 |
| 601.5220 | 40.97  | 16.26 | 10.27 | 10.92 | 13.50 | 1.02 |
| 601.9559 | 54     | 15.66 | 14.83 | 15.90 | 12.76 | 0.21 |
| 602.0841 | 62.75  | 16.54 | 16.73 | 17.20 | 15.81 | 0.13 |
| 602.1154 | 281.86 | 15.45 | 18.46 | 18.86 | 17.89 | 1.30 |
| 602.1264 | 281.24 | 14.84 | 14.33 | 11.62 | 12.76 | 0.43 |
| 602.3143 | 278.66 | 15.55 | 14.87 | 14.75 | 15.14 | 0.32 |
| 602.4700 | 46.02  | 16.71 | 14.55 | 14.95 | 12.70 | 0.77 |
| 602.5232 | 42.75  | 16.16 | 10.20 | 10.19 | 12.83 | 1.42 |
| 602.5650 | 50.6   | 14.75 | 14.78 | 14.37 | 13.41 | 0.13 |
| 602.5651 | 277.1  | 11.08 | 14.16 | 14.25 | 12.78 | 0.79 |
| 602.6063 | 46.39  | 16.29 | 17.92 | 17.66 | 17.30 | 0.79 |
| 602.6860 | 278.64 | 12.41 | 14.11 | 14.58 | 13.97 | 0.70 |
| 602.6961 | 47.12  | 16.22 | 18.45 | 18.56 | 18.27 | 1.39 |
| 602.8141 | 277.93 | 14.64 | 14.64 | 14.80 | 14.18 | 0.00 |
| 602.8249 | 25.6   | 14.13 | 16.59 | 17.27 | 14.86 | 0.93 |
| 602.9387 | 278.98 | 15.83 | 16.00 | 15.48 | 15.65 | 0.05 |
| 603.0614 | 279.11 | 13.86 | 16.84 | 16.08 | 15.20 | 0.92 |
| 603.1190 | 297.4  | 11.18 | 14.65 | 14.67 | 14.07 | 1.06 |
| 603.1529 | 137.11 | 12.86 | 17.22 | 17.53 | 15.12 | 1.49 |
| 603.1853 | 278.71 | 14.98 | 16.21 | 15.73 | 15.62 | 0.54 |
| 603.3107 | 277.71 | 15.63 | 14.27 | 14.71 | 15.30 | 0.57 |
| 603.4235 | 49.57  | 14.28 | 15.61 | 14.57 | 14.39 | 0.33 |
| 603.4340 | 279.13 | 15.17 | 14.87 | 14.58 | 14.67 | 0.22 |
| 603.4625 | 280.2  | 14.41 | 15.28 | 14.71 | 14.59 | 0.22 |
| 603.5346 | 22.96  | 14.78 | 5.49  | 5.74  | 8.22  | 1.70 |
| 603.6960 | 49.16  | 8.98  | 14.02 | 14.00 | 13.57 | 1.56 |
| 603.6988 | 274.67 | 15.64 | 14.28 | 14.60 | 14.66 | 0.67 |
| 603.8246 | 273.12 | 15.85 | 14.31 | 14.60 | 14.52 | 0.79 |
| 603.9513 | 272.37 | 15.21 | 14.67 | 14.81 | 14.85 | 0.23 |
| 604.1550 | 140.27 | 7.30  | 10.84 | 11.39 | 9.20  | 1.05 |
| 604.3099 | 278.74 | 16.07 | 14.71 | 14.81 | 15.57 | 0.62 |
| 604.4231 | 49.48  | 12.28 | 15.20 | 14.52 | 14.02 | 0.75 |
| 604.4340 | 278.89 | 15.79 | 14.45 | 14.64 | 14.60 | 0.65 |
| 604.4678 | 46.05  | 16.40 | 13.27 | 13.61 | 13.30 | 1.13 |
| 604.4750 | 268.47 | 14.89 | 14.27 | 15.13 | 14.51 | 0.09 |
| 604.5325 | 55.28  | 13.71 | 16.26 | 15.88 | 16.09 | 0.76 |
| 604.5547 | 274.78 | 14.65 | 14.73 | 15.09 | 15.23 | 0.12 |
| 604.5612 | 47.79  | 16.53 | 17.72 | 17.63 | 16.34 | 0.40 |
| 604.6089 | 46.52  | 14.19 | 14.46 | 14.18 | 14.52 | 0.09 |
| 604.6879 | 276.36 | 14.05 | 15.16 | 14.78 | 14.85 | 0.45 |

|          |        |       |       |       |       |      |
|----------|--------|-------|-------|-------|-------|------|
| 604.6950 | 47.47  | 14.23 | 17.43 | 17.51 | 17.77 | 1.53 |
| 604.7449 | 266.03 | 15.42 | 13.85 | 14.37 | 14.47 | 0.71 |
| 604.8103 | 278.32 | 15.14 | 14.92 | 14.63 | 14.92 | 0.17 |
| 604.9058 | 57.15  | 18.79 | 17.68 | 16.93 | 14.94 | 0.57 |
| 604.9677 | 52.42  | 19.93 | 21.50 | 21.73 | 20.35 | 1.03 |
| 605.0338 | 55.29  | 10.15 | 12.36 | 11.53 | 13.23 | 0.58 |
| 605.0609 | 277.87 | 14.26 | 14.90 | 14.67 | 15.05 | 0.30 |
| 605.1398 | 58.24  | 11.10 | 16.34 | 15.51 | 16.38 | 1.43 |
| 605.1771 | 271.38 | 9.83  | 15.10 | 15.53 | 14.19 | 1.34 |
| 605.1930 | 281.7  | 13.89 | 14.17 | 14.63 | 14.36 | 0.25 |
| 605.3153 | 278.6  | 15.58 | 16.58 | 16.15 | 16.12 | 0.34 |
| 605.3242 | 61.1   | 11.19 | 12.53 | 12.81 | 12.63 | 0.55 |
| 605.4604 | 278.23 | 14.39 | 14.34 | 15.07 | 14.49 | 0.12 |
| 605.5309 | 55.59  | 11.76 | 15.28 | 14.94 | 14.91 | 0.87 |
| 605.5635 | 281.67 | 14.95 | 14.28 | 14.70 | 14.86 | 0.19 |
| 605.6036 | 277.53 | 15.38 | 14.62 | 15.04 | 14.57 | 0.32 |
| 605.6929 | 49.24  | 10.88 | 12.81 | 13.15 | 12.77 | 0.98 |
| 605.6986 | 286.43 | 14.42 | 14.84 | 15.13 | 14.71 | 0.31 |
| 605.7483 | 277.17 | 15.71 | 14.78 | 14.80 | 14.26 | 0.52 |
| 605.8919 | 270.85 | 14.95 | 14.41 | 14.93 | 14.91 | 0.14 |
| 605.8981 | 48.04  | 16.54 | 17.66 | 17.98 | 16.52 | 0.49 |
| 605.9683 | 52.98  | 16.37 | 18.21 | 18.52 | 16.91 | 0.98 |
| 606.0335 | 73.41  | 11.49 | 14.99 | 14.23 | 13.54 | 0.92 |
| 606.0618 | 278.62 | 15.66 | 14.85 | 14.68 | 15.05 | 0.54 |
| 606.1573 | 281.74 | 10.01 | 15.16 | 13.83 | 14.53 | 1.21 |
| 606.1769 | 157.06 | 5.96  | 11.26 | 11.31 | 9.18  | 1.43 |
| 606.1817 | 279.15 | 14.12 | 14.18 | 14.28 | 13.98 | 0.05 |
| 606.2970 | 34.34  | 14.38 | 16.79 | 17.07 | 16.92 | 1.12 |
| 606.3135 | 278.51 | 15.97 | 16.17 | 15.66 | 16.10 | 0.00 |
| 606.4353 | 278.97 | 15.48 | 14.72 | 14.90 | 14.56 | 0.44 |
| 606.4661 | 39.01  | 15.81 | 13.61 | 13.76 | 14.08 | 0.86 |
| 606.5592 | 47.42  | 17.41 | 17.93 | 17.89 | 17.22 | 0.31 |
| 606.5619 | 277.66 | 13.57 | 14.45 | 14.90 | 14.52 | 0.43 |
| 606.6423 | 46.2   | 16.62 | 18.88 | 18.71 | 18.39 | 1.21 |
| 606.6881 | 278.55 | 15.17 | 15.61 | 15.07 | 14.63 | 0.05 |
| 606.6963 | 48.45  | 11.65 | 13.87 | 13.74 | 14.14 | 0.85 |
| 606.7821 | 43.7   | 11.00 | 14.04 | 14.23 | 14.50 | 0.90 |
| 606.8147 | 277.63 | 14.25 | 16.30 | 15.38 | 14.97 | 0.70 |
| 606.9023 | 48.55  | 15.47 | 13.14 | 11.60 | 10.93 | 0.82 |
| 606.9397 | 277.85 | 16.00 | 16.67 | 16.03 | 15.86 | 0.17 |
| 606.9613 | 51.14  | 17.76 | 19.14 | 19.36 | 17.92 | 0.78 |
| 607.0651 | 277.78 | 15.69 | 15.73 | 15.58 | 15.56 | 0.03 |
| 607.1605 | 188.38 | 9.36  | 13.26 | 14.04 | 12.08 | 1.36 |
| 607.1898 | 277.96 | 14.73 | 15.28 | 15.54 | 15.32 | 0.36 |
| 607.3157 | 276.78 | 15.22 | 15.28 | 15.18 | 15.28 | 0.01 |
| 607.5367 | 53.78  | 15.37 | 18.76 | 18.29 | 17.58 | 1.41 |
| 607.6876 | 277.29 | 14.47 | 14.62 | 14.65 | 14.54 | 0.09 |
| 607.7739 | 49.51  | 11.35 | 12.82 | 12.77 | 12.08 | 0.41 |
| 607.8115 | 279.03 | 15.49 | 15.51 | 15.32 | 15.23 | 0.05 |
| 607.8940 | 271.17 | 13.22 | 15.17 | 15.31 | 15.33 | 0.74 |
| 607.8950 | 52.22  | 15.10 | 16.40 | 16.24 | 15.12 | 0.47 |
| 607.9376 | 277.37 | 14.77 | 14.66 | 14.98 | 14.55 | 0.00 |
| 607.9710 | 53.22  | 16.20 | 19.12 | 18.61 | 17.12 | 0.89 |
| 608.0380 | 53.63  | 10.71 | 16.09 | 15.12 | 14.29 | 1.25 |
| 608.0637 | 277.34 | 15.60 | 15.49 | 15.24 | 15.52 | 0.12 |
| 608.0888 | 298.08 | 17.03 | 16.39 | 16.60 | 15.90 | 0.28 |

|          |        |       |       |       |       |      |
|----------|--------|-------|-------|-------|-------|------|
| 608.1894 | 279.1  | 12.80 | 18.24 | 18.33 | 16.53 | 1.50 |
| 608.2349 | 38.15  | 12.69 | 14.09 | 14.28 | 16.50 | 0.52 |
| 608.3096 | 49.12  | 13.28 | 15.65 | 16.48 | 15.13 | 1.02 |
| 608.3147 | 278.63 | 15.96 | 18.17 | 18.13 | 17.56 | 1.08 |
| 608.3354 | 279.25 | 15.65 | 14.31 | 14.36 | 14.60 | 0.58 |
| 608.3875 | 27.5   | 16.19 | 10.52 | 13.47 | 11.43 | 1.30 |
| 608.4397 | 278.79 | 15.63 | 17.86 | 17.96 | 16.94 | 1.01 |
| 608.4724 | 47.98  | 15.46 | 16.52 | 15.43 | 15.14 | 0.22 |
| 608.5329 | 46.16  | 16.16 | 17.55 | 16.38 | 16.61 | 0.32 |
| 608.5580 | 47.5   | 15.26 | 16.92 | 16.81 | 15.75 | 0.53 |
| 608.5653 | 276.53 | 12.39 | 14.89 | 15.08 | 14.66 | 0.88 |
| 608.6394 | 46.83  | 17.93 | 19.77 | 19.77 | 19.25 | 1.31 |
| 608.6907 | 277.88 | 15.27 | 16.83 | 16.19 | 15.65 | 0.58 |
| 608.6954 | 47.69  | 9.71  | 11.55 | 11.65 | 10.24 | 0.86 |
| 608.7762 | 39.15  | 12.86 | 14.77 | 15.50 | 15.06 | 0.97 |
| 608.8103 | 278.13 | 13.38 | 14.13 | 14.46 | 13.72 | 0.38 |
| 608.9408 | 274.79 | 15.26 | 14.54 | 14.36 | 14.44 | 0.41 |
| 608.9704 | 54.19  | 16.10 | 17.84 | 17.50 | 16.52 | 0.90 |
| 609.0638 | 276.8  | 15.46 | 14.12 | 14.87 | 14.88 | 0.51 |
| 609.0858 | 279.22 | 14.92 | 18.24 | 19.24 | 17.57 | 1.25 |
| 609.3149 | 278.93 | 15.92 | 14.76 | 14.78 | 15.17 | 0.63 |
| 609.4379 | 279.35 | 15.00 | 14.36 | 14.73 | 14.29 | 0.35 |
| 609.5599 | 278.9  | 14.92 | 14.75 | 14.57 | 14.31 | 0.19 |
| 609.6405 | 48.87  | 13.45 | 15.65 | 15.67 | 15.02 | 1.07 |
| 609.6863 | 279.07 | 15.49 | 16.76 | 16.46 | 15.71 | 0.54 |
| 609.7595 | 44.4   | 13.04 | 11.83 | 11.40 | 12.30 | 0.65 |
| 609.8109 | 279.22 | 15.66 | 17.97 | 17.91 | 17.21 | 1.06 |
| 609.8582 | 55.29  | 16.98 | 11.97 | 11.75 | 12.08 | 1.32 |
| 609.9355 | 279.45 | 15.74 | 18.38 | 18.37 | 17.65 | 1.15 |
| 610.0605 | 279.27 | 15.81 | 18.34 | 18.54 | 17.35 | 1.33 |
| 610.0862 | 61.03  | 10.98 | 13.64 | 13.96 | 13.38 | 0.92 |
| 610.0877 | 288.39 | 12.16 | 14.60 | 15.21 | 14.61 | 0.78 |
| 610.1845 | 20.31  | 18.05 | 17.43 | 18.31 | 18.00 | 0.17 |
| 610.1879 | 277.1  | 16.49 | 16.76 | 16.50 | 16.22 | 0.07 |
| 610.3143 | 279.49 | 16.61 | 18.55 | 18.63 | 18.07 | 1.00 |
| 610.4386 | 278.98 | 15.88 | 18.11 | 17.90 | 17.16 | 1.14 |
| 610.4923 | 279.01 | 13.89 | 15.07 | 14.82 | 14.21 | 0.50 |
| 610.5070 | 47.92  | 16.23 | 15.77 | 15.45 | 15.52 | 0.29 |
| 610.5530 | 42.85  | 17.06 | 14.22 | 13.27 | 14.28 | 1.08 |
| 610.5639 | 276.42 | 14.91 | 15.32 | 15.30 | 15.28 | 0.21 |
| 610.6379 | 46.39  | 16.93 | 18.96 | 18.89 | 18.11 | 0.99 |
| 610.6583 | 278.79 | 15.75 | 14.97 | 15.17 | 14.82 | 0.34 |
| 610.6899 | 277.75 | 15.73 | 16.93 | 16.39 | 15.86 | 0.47 |
| 610.6903 | 47.89  | 9.48  | 11.82 | 12.75 | 11.32 | 0.99 |
| 610.7288 | 47.32  | 15.28 | 17.36 | 17.60 | 17.66 | 1.24 |
| 610.8181 | 278.28 | 15.34 | 17.35 | 16.69 | 16.26 | 0.83 |
| 610.8509 | 52     | 15.55 | 15.15 | 15.97 | 14.20 | 0.10 |
| 610.9757 | 54.04  | 20.19 | 22.20 | 21.72 | 20.89 | 0.98 |
| 611.0645 | 277.8  | 15.57 | 14.40 | 14.63 | 14.55 | 0.49 |
| 611.0894 | 293.5  | 15.14 | 13.89 | 14.38 | 13.74 | 0.50 |
| 611.1275 | 76.45  | 13.44 | 15.02 | 12.48 | 14.90 | 0.26 |
| 611.1441 | 244.68 | 10.05 | 13.87 | 13.87 | 11.59 | 0.81 |
| 611.1628 | 277.5  | 14.46 | 13.70 | 14.06 | 13.73 | 0.24 |
| 611.1849 | 21.12  | 17.37 | 15.65 | 17.06 | 16.84 | 0.67 |
| 611.1874 | 277.89 | 15.29 | 14.44 | 14.79 | 15.38 | 0.31 |
| 611.3161 | 279.25 | 15.65 | 17.37 | 17.00 | 16.62 | 0.67 |



|          |        |       |       |       |       |      |
|----------|--------|-------|-------|-------|-------|------|
| 611.4096 | 52.3   | 13.62 | 15.49 | 15.25 | 14.10 | 0.76 |
| 611.4410 | 278.22 | 15.34 | 16.33 | 16.21 | 15.87 | 0.45 |
| 611.4767 | 53.67  | 13.89 | 14.89 | 12.08 | 14.30 | 0.07 |
| 611.5437 | 22.45  | 15.58 | 8.04  | 8.47  | 9.69  | 1.89 |
| 611.5618 | 279.2  | 15.62 | 17.34 | 16.83 | 16.39 | 0.71 |
| 611.6048 | 265.44 | 13.44 | 14.22 | 14.65 | 14.38 | 0.39 |
| 611.6379 | 49.03  | 13.71 | 15.63 | 15.88 | 14.85 | 1.01 |
| 611.6870 | 279.35 | 15.38 | 17.90 | 17.80 | 16.72 | 1.09 |
| 611.7278 | 48.87  | 9.60  | 12.37 | 12.54 | 12.60 | 1.02 |
| 611.8117 | 279.13 | 15.79 | 18.29 | 18.34 | 17.44 | 1.17 |
| 611.8436 | 50.35  | 17.48 | 18.39 | 18.69 | 17.72 | 0.68 |
| 611.9355 | 279.49 | 15.70 | 18.85 | 18.84 | 17.91 | 1.38 |
| 611.9768 | 53.67  | 16.55 | 18.96 | 18.22 | 17.14 | 0.70 |
| 612.0639 | 283.79 | 11.19 | 19.43 | 19.48 | 18.18 | 1.51 |
| 612.1007 | 83.91  | 9.11  | 12.92 | 10.16 | 9.69  | 0.69 |
| 612.1821 | 22.34  | 16.46 | 14.25 | 15.90 | 15.74 | 0.84 |
| 612.1859 | 279.74 | 14.50 | 19.35 | 18.79 | 18.23 | 1.38 |
| 612.3128 | 279.23 | 16.56 | 19.68 | 19.66 | 18.93 | 1.29 |
| 612.3335 | 276.04 | 15.73 | 14.32 | 14.76 | 14.81 | 0.56 |
| 612.4075 | 48.77  | 14.59 | 16.23 | 15.78 | 15.69 | 0.79 |
| 612.4375 | 279.37 | 15.99 | 19.37 | 19.37 | 18.50 | 1.48 |
| 612.4761 | 267.66 | 15.40 | 14.36 | 14.97 | 14.67 | 0.43 |
| 612.5079 | 50.19  | 17.34 | 17.31 | 17.18 | 17.47 | 0.04 |
| 612.5608 | 278.54 | 16.29 | 19.01 | 18.97 | 18.11 | 1.28 |
| 612.5943 | 47.3   | 15.08 | 16.69 | 16.59 | 16.26 | 0.97 |
| 612.6244 | 270.17 | 15.57 | 16.33 | 16.10 | 15.73 | 0.30 |
| 612.6365 | 46.8   | 14.05 | 17.26 | 17.11 | 16.95 | 1.35 |
| 612.6898 | 278.34 | 16.01 | 18.77 | 18.49 | 18.03 | 1.21 |
| 612.6938 | 48.69  | 8.55  | 8.78  | 9.14  | 9.47  | 0.21 |
| 612.7258 | 48.07  | 14.89 | 17.68 | 17.87 | 18.14 | 1.32 |
| 612.7661 | 265.1  | 15.76 | 16.24 | 16.47 | 15.79 | 0.34 |
| 612.8146 | 277.59 | 14.93 | 14.51 | 14.88 | 15.07 | 0.14 |
| 612.8380 | 270.79 | 16.03 | 16.32 | 16.22 | 16.29 | 0.15 |
| 612.8467 | 51.96  | 15.06 | 13.70 | 13.81 | 12.80 | 0.63 |
| 612.9388 | 42.07  | 7.89  | 10.17 | 14.19 | 10.73 | 0.99 |
| 612.9709 | 53.65  | 17.51 | 19.32 | 18.76 | 18.00 | 0.84 |
| 612.9809 | 270.51 | 16.46 | 15.55 | 15.10 | 15.34 | 0.53 |
| 613.0800 | 42.34  | 17.44 | 16.47 | 17.19 | 18.16 | 0.21 |
| 613.1592 | 272.67 | 19.41 | 22.66 | 23.38 | 22.63 | 1.59 |
| 613.3156 | 279.24 | 16.13 | 18.30 | 18.20 | 17.58 | 0.97 |
| 613.4072 | 48.14  | 13.07 | 13.57 | 11.98 | 13.06 | 0.07 |
| 613.4398 | 279.32 | 15.61 | 18.17 | 18.11 | 17.30 | 1.12 |
| 613.4810 | 23.13  | 14.06 | 6.17  | 6.54  | 7.63  | 1.68 |
| 613.5179 | 54.04  | 11.90 | 10.00 | 9.70  | 12.41 | 0.42 |
| 613.5211 | 276.42 | 13.86 | 14.43 | 14.18 | 14.78 | 0.18 |
| 613.5645 | 279.35 | 16.01 | 18.44 | 18.40 | 17.22 | 1.14 |
| 613.6356 | 48.82  | 10.43 | 13.00 | 13.01 | 11.80 | 0.82 |
| 613.6593 | 280.39 | 15.29 | 14.97 | 14.82 | 14.58 | 0.21 |
| 613.6943 | 279.2  | 15.72 | 18.77 | 18.61 | 17.52 | 1.25 |
| 613.7234 | 49.48  | 11.22 | 14.30 | 14.98 | 14.48 | 1.28 |
| 613.8158 | 279.38 | 16.22 | 18.69 | 18.74 | 17.85 | 1.17 |
| 613.8404 | 50.78  | 16.97 | 18.15 | 18.56 | 17.41 | 0.72 |
| 613.9336 | 279.23 | 16.01 | 19.20 | 19.04 | 18.01 | 1.32 |
| 613.9527 | 53.15  | 13.56 | 13.02 | 14.53 | 11.70 | 0.06 |
| 614.0622 | 279.28 | 15.32 | 19.24 | 19.28 | 17.96 | 1.43 |
| 614.0833 | 42.48  | 14.10 | 11.32 | 12.54 | 14.15 | 0.62 |

|          |        |       |       |       |       |      |
|----------|--------|-------|-------|-------|-------|------|
| 614.1196 | 278.83 | 15.35 | 14.83 | 15.01 | 15.14 | 0.22 |
| 614.1624 | 271.97 | 17.74 | 20.17 | 21.35 | 20.30 | 1.41 |
| 614.1884 | 279.33 | 16.19 | 19.14 | 19.15 | 18.13 | 1.47 |
| 614.3143 | 279.39 | 16.27 | 19.26 | 19.22 | 18.49 | 1.19 |
| 614.4373 | 279.31 | 16.21 | 18.62 | 18.68 | 17.79 | 1.14 |
| 614.5015 | 46.97  | 16.41 | 16.41 | 15.87 | 15.83 | 0.15 |
| 614.5619 | 279.17 | 15.49 | 18.18 | 18.11 | 17.25 | 1.38 |
| 614.5904 | 47.2   | 16.81 | 18.41 | 18.40 | 17.64 | 0.88 |
| 614.6891 | 277.03 | 15.88 | 14.61 | 15.06 | 14.89 | 0.72 |
| 614.7122 | 48.68  | 15.56 | 12.50 | 11.60 | 12.44 | 1.02 |
| 614.7214 | 48.72  | 14.66 | 16.59 | 16.54 | 17.19 | 1.06 |
| 614.8129 | 279.03 | 13.17 | 16.17 | 15.93 | 15.68 | 0.88 |
| 614.9242 | 274.89 | 15.60 | 16.47 | 16.17 | 15.42 | 0.25 |
| 614.9288 | 73.38  | 16.21 | 13.03 | 12.15 | 12.10 | 0.97 |
| 615.0638 | 279.08 | 16.04 | 16.26 | 15.70 | 15.92 | 0.02 |
| 615.1246 | 275.33 | 15.15 | 17.19 | 16.99 | 16.25 | 0.66 |
| 615.1630 | 273.71 | 17.04 | 15.62 | 16.50 | 17.17 | 0.33 |
| 615.1881 | 274.5  | 14.94 | 17.19 | 16.63 | 16.79 | 1.00 |
| 615.3187 | 279.04 | 16.50 | 19.10 | 18.84 | 18.33 | 1.06 |
| 615.4406 | 279.31 | 15.88 | 18.68 | 18.80 | 17.47 | 1.23 |
| 615.4977 | 22.49  | 17.03 | 9.80  | 11.07 | 12.59 | 1.67 |
| 615.5239 | 53.82  | 13.57 | 17.28 | 17.46 | 16.49 | 1.29 |
| 615.5249 | 274.57 | 13.56 | 16.10 | 15.54 | 14.39 | 0.67 |
| 615.5659 | 279.33 | 15.89 | 19.33 | 19.32 | 18.17 | 1.58 |
| 615.6917 | 277.63 | 16.17 | 19.43 | 19.41 | 17.95 | 1.34 |
| 615.7223 | 49.39  | 10.69 | 12.86 | 13.18 | 12.84 | 0.98 |
| 615.7256 | 275.95 | 14.84 | 15.46 | 15.11 | 14.54 | 0.14 |
| 615.8163 | 277.69 | 16.03 | 19.35 | 19.22 | 18.14 | 1.37 |
| 615.8377 | 50.89  | 15.62 | 16.31 | 16.10 | 14.85 | 0.25 |
| 615.9410 | 277.32 | 15.13 | 18.67 | 18.76 | 17.83 | 1.48 |
| 615.9573 | 52.96  | 16.12 | 17.93 | 18.14 | 16.36 | 0.88 |
| 616.0249 | 53.95  | 10.87 | 13.01 | 13.11 | 12.23 | 0.59 |
| 616.0660 | 279.27 | 15.37 | 18.86 | 18.94 | 17.96 | 1.44 |
| 616.1292 | 95.62  | 7.87  | 12.33 | 12.53 | 10.67 | 1.20 |
| 616.1560 | 284.96 | 15.86 | 16.74 | 17.39 | 17.16 | 0.63 |
| 616.1783 | 53.03  | 20.38 | 18.78 | 16.67 | 20.75 | 0.59 |
| 616.1912 | 279.22 | 16.56 | 18.18 | 18.10 | 17.39 | 0.81 |
| 616.3177 | 278.1  | 15.52 | 14.93 | 15.02 | 15.53 | 0.24 |
| 616.4404 | 279.48 | 15.92 | 15.91 | 15.39 | 15.54 | 0.13 |
| 616.4479 | 46.96  | 15.65 | 11.50 | 12.21 | 11.83 | 1.34 |
| 616.4569 | 52.92  | 10.72 | 11.47 | 12.58 | 9.93  | 0.30 |
| 616.5002 | 39.77  | 16.10 | 12.85 | 12.26 | 13.14 | 1.19 |
| 616.5225 | 57.61  | 14.41 | 15.48 | 15.66 | 15.25 | 0.54 |
| 616.5661 | 279.56 | 15.84 | 17.09 | 16.53 | 16.31 | 0.47 |
| 616.5876 | 47.34  | 16.51 | 18.39 | 18.33 | 17.55 | 0.90 |
| 616.6724 | 46.41  | 15.99 | 18.70 | 18.43 | 18.57 | 1.55 |
| 616.6885 | 285.56 | 15.84 | 17.48 | 17.56 | 16.84 | 0.68 |
| 616.8137 | 49.64  | 9.39  | 10.06 | 9.86  | 12.25 | 0.26 |
| 616.8151 | 279.47 | 13.38 | 18.35 | 18.51 | 17.48 | 1.36 |
| 616.9392 | 279.38 | 15.99 | 18.38 | 18.37 | 17.78 | 0.97 |
| 616.9560 | 52.83  | 13.98 | 16.73 | 16.75 | 15.01 | 0.99 |
| 617.0209 | 196.12 | 10.13 | 13.39 | 14.91 | 12.97 | 1.09 |
| 617.0535 | 86.58  | 9.83  | 17.28 | 17.81 | 15.63 | 1.82 |
| 617.0667 | 279.53 | 16.40 | 18.21 | 18.27 | 17.45 | 0.88 |
| 617.1065 | 277.54 | 15.64 | 14.66 | 15.72 | 15.68 | 0.19 |
| 617.1221 | 67.26  | 8.75  | 11.93 | 10.87 | 11.27 | 0.80 |

|          |        |       |       |       |       |      |
|----------|--------|-------|-------|-------|-------|------|
| 617.1743 | 57.65  | 17.99 | 16.08 | 12.44 | 18.45 | 0.60 |
| 617.1838 | 286.34 | 15.90 | 15.36 | 14.87 | 15.75 | 0.31 |
| 617.3162 | 279.53 | 16.53 | 18.62 | 18.68 | 17.86 | 0.98 |
| 617.4403 | 279.51 | 15.96 | 19.03 | 19.02 | 17.68 | 1.18 |
| 617.5133 | 23.12  | 18.30 | 15.14 | 15.92 | 16.61 | 0.90 |
| 617.5661 | 279.26 | 16.37 | 18.63 | 18.69 | 17.42 | 1.03 |
| 617.5718 | 65.48  | 12.71 | 11.97 | 12.42 | 12.00 | 0.15 |
| 617.6083 | 279.21 | 14.34 | 13.13 | 14.16 | 13.86 | 0.27 |
| 617.6933 | 277.73 | 15.66 | 19.82 | 19.56 | 18.92 | 1.42 |
| 617.8119 | 54.08  | 12.02 | 12.71 | 13.33 | 13.38 | 0.39 |
| 617.8220 | 275.1  | 16.41 | 20.57 | 20.41 | 19.17 | 1.49 |
| 617.9228 | 279.51 | 12.19 | 13.52 | 13.05 | 12.32 | 0.24 |
| 617.9245 | 53.73  | 15.84 | 14.63 | 12.85 | 12.30 | 0.61 |
| 617.9483 | 275.52 | 16.49 | 21.31 | 21.09 | 19.82 | 1.66 |
| 618.0586 | 65.53  | 14.13 | 15.12 | 15.98 | 13.27 | 0.29 |
| 618.0736 | 275.13 | 16.55 | 21.13 | 20.80 | 19.75 | 1.61 |
| 618.1098 | 275.39 | 12.82 | 16.11 | 15.69 | 15.30 | 0.78 |
| 618.1985 | 274.08 | 16.41 | 20.62 | 20.48 | 19.24 | 1.56 |
| 618.2568 | 42.49  | 10.37 | 14.86 | 14.78 | 15.62 | 1.30 |
| 618.3242 | 274.04 | 16.47 | 19.91 | 19.69 | 18.73 | 1.45 |
| 618.4448 | 45.68  | 16.49 | 13.60 | 13.37 | 13.78 | 1.28 |
| 618.4482 | 275.6  | 15.57 | 18.86 | 18.58 | 18.09 | 1.19 |
| 618.5249 | 45.15  | 17.50 | 18.92 | 18.32 | 18.40 | 0.59 |
| 618.5693 | 270.18 | 16.61 | 18.11 | 18.35 | 18.02 | 0.70 |
| 618.5858 | 47.36  | 15.90 | 17.33 | 17.22 | 16.89 | 0.93 |
| 618.6695 | 46.51  | 16.44 | 19.16 | 19.08 | 18.65 | 1.37 |
| 618.7020 | 273.32 | 15.99 | 14.87 | 15.20 | 14.88 | 0.52 |
| 618.7848 | 279.75 | 15.36 | 14.03 | 14.66 | 14.97 | 0.38 |
| 618.8176 | 278.14 | 16.02 | 19.63 | 19.33 | 18.98 | 1.24 |
| 618.8288 | 277.56 | 15.61 | 14.22 | 14.61 | 14.84 | 0.71 |
| 618.9031 | 280.63 | 15.02 | 14.44 | 14.25 | 14.27 | 0.31 |
| 618.9397 | 279.76 | 17.15 | 20.51 | 20.53 | 19.66 | 1.33 |
| 618.9597 | 52.33  | 16.17 | 18.67 | 18.07 | 17.69 | 1.02 |
| 619.0292 | 53.71  | 12.82 | 16.10 | 14.68 | 14.95 | 0.99 |
| 619.0674 | 279.75 | 15.85 | 20.84 | 20.77 | 20.11 | 1.50 |
| 619.0810 | 278.23 | 15.31 | 14.25 | 14.73 | 14.64 | 0.49 |
| 619.1223 | 285.08 | 16.00 | 16.90 | 17.49 | 17.26 | 0.59 |
| 619.1635 | 25.49  | 11.81 | 6.46  | 6.88  | 11.98 | 0.89 |
| 619.1886 | 279.76 | 16.60 | 20.83 | 20.72 | 19.98 | 1.51 |
| 619.2199 | 280.01 | 13.63 | 14.25 | 13.87 | 14.56 | 0.20 |
| 619.2890 | 279.31 | 15.95 | 14.52 | 14.84 | 14.72 | 0.62 |
| 619.3185 | 280.12 | 17.18 | 20.69 | 20.63 | 20.03 | 1.33 |
| 619.3980 | 51.28  | 13.11 | 14.45 | 14.08 | 12.11 | 0.33 |
| 619.4436 | 280.27 | 16.44 | 20.29 | 20.15 | 19.59 | 1.41 |
| 619.4646 | 53.28  | 13.36 | 13.32 | 12.63 | 12.79 | 0.23 |
| 619.5271 | 44.31  | 18.13 | 17.52 | 16.69 | 17.40 | 0.56 |
| 619.5685 | 279.98 | 16.02 | 19.87 | 19.82 | 19.03 | 1.48 |
| 619.6700 | 48.96  | 10.59 | 15.11 | 14.75 | 14.41 | 1.47 |
| 619.6920 | 279.59 | 16.39 | 19.27 | 19.33 | 18.69 | 1.24 |
| 619.8181 | 279.51 | 16.34 | 18.70 | 18.49 | 17.88 | 0.99 |
| 619.9426 | 279.4  | 15.49 | 17.70 | 17.36 | 17.00 | 0.80 |
| 619.9602 | 57.67  | 15.36 | 17.22 | 16.44 | 15.96 | 0.72 |
| 620.0249 | 53.12  | 10.99 | 12.46 | 11.13 | 12.31 | 0.35 |
| 620.0692 | 279.54 | 15.41 | 15.47 | 15.17 | 15.85 | 0.00 |
| 620.1250 | 284.79 | 16.35 | 18.87 | 18.83 | 17.85 | 1.18 |
| 620.1516 | 280.62 | 13.48 | 14.48 | 14.28 | 14.44 | 0.34 |

|          |        |       |       |       |       |      |
|----------|--------|-------|-------|-------|-------|------|
| 620.1585 | 70.64  | 12.99 | 15.77 | 11.84 | 15.62 | 0.33 |
| 620.1981 | 279.48 | 15.78 | 14.77 | 14.83 | 15.21 | 0.52 |
| 620.3258 | 279.48 | 15.49 | 16.36 | 15.80 | 16.78 | 0.27 |
| 620.3908 | 276.32 | 13.19 | 15.85 | 15.48 | 14.94 | 0.84 |
| 620.3956 | 50.16  | 13.24 | 13.16 | 13.61 | 11.88 | 0.05 |
| 620.4405 | 38.37  | 16.67 | 12.08 | 12.49 | 13.57 | 1.51 |
| 620.4511 | 277.62 | 16.44 | 15.75 | 15.32 | 15.81 | 0.38 |
| 620.5160 | 279.24 | 16.55 | 15.65 | 15.06 | 15.72 | 0.49 |
| 620.5339 | 46.71  | 17.89 | 17.30 | 17.34 | 17.42 | 0.41 |
| 620.5776 | 278.43 | 15.86 | 15.43 | 14.83 | 15.57 | 0.29 |
| 620.5792 | 46.14  | 13.48 | 11.59 | 11.61 | 11.78 | 0.91 |
| 620.6587 | 279.94 | 13.85 | 14.04 | 14.34 | 14.41 | 0.15 |
| 620.6669 | 46.56  | 14.95 | 18.31 | 18.32 | 18.11 | 1.33 |
| 620.7609 | 47.1   | 12.76 | 16.02 | 16.47 | 16.79 | 1.17 |
| 620.8190 | 279.6  | 16.75 | 18.00 | 17.84 | 17.54 | 0.58 |
| 620.8794 | 54.6   | 17.79 | 15.41 | 15.93 | 14.17 | 0.75 |
| 620.9084 | 270.92 | 14.17 | 13.70 | 12.58 | 13.96 | 0.24 |
| 620.9415 | 52.15  | 18.85 | 17.74 | 18.64 | 17.35 | 0.59 |
| 620.9417 | 277.63 | 14.51 | 17.04 | 17.32 | 16.40 | 0.98 |
| 620.9886 | 279.92 | 15.67 | 16.06 | 15.91 | 15.45 | 0.11 |
| 621.0687 | 279.71 | 17.15 | 24.79 | 24.66 | 23.30 | 1.72 |
| 621.1936 | 280.96 | 17.62 | 26.09 | 26.02 | 24.58 | 1.74 |
| 621.3183 | 280.29 | 17.64 | 26.60 | 26.52 | 25.06 | 1.74 |
| 621.4434 | 281.79 | 17.90 | 26.43 | 26.41 | 24.73 | 1.75 |
| 621.5689 | 281.43 | 17.40 | 26.03 | 25.95 | 24.50 | 1.75 |
| 621.6942 | 279.73 | 17.12 | 25.37 | 25.26 | 23.91 | 1.73 |
| 621.8195 | 280.17 | 16.67 | 24.39 | 24.28 | 23.07 | 1.72 |
| 621.8723 | 50.44  | 15.05 | 15.76 | 16.15 | 14.74 | 0.26 |
| 621.9426 | 52.42  | 15.47 | 13.70 | 14.07 | 12.27 | 0.61 |
| 621.9446 | 281.15 | 15.84 | 22.67 | 22.56 | 21.79 | 1.63 |
| 622.0371 | 281.17 | 16.23 | 15.28 | 14.85 | 15.11 | 0.45 |
| 622.0702 | 279.5  | 16.63 | 22.13 | 22.03 | 20.74 | 1.72 |
| 622.1954 | 280.44 | 15.64 | 20.60 | 20.54 | 19.50 | 1.62 |
| 622.3207 | 279.38 | 16.93 | 19.08 | 19.08 | 18.51 | 0.98 |
| 622.4456 | 279.48 | 15.75 | 17.16 | 16.55 | 16.56 | 0.45 |
| 622.5341 | 47.28  | 17.25 | 17.67 | 17.57 | 17.16 | 0.24 |
| 622.5768 | 277.22 | 16.21 | 15.07 | 15.58 | 15.41 | 0.38 |
| 622.5774 | 45.45  | 12.42 | 12.91 | 13.47 | 12.98 | 0.18 |
| 622.6221 | 46.95  | 16.06 | 17.47 | 17.48 | 17.08 | 0.87 |
| 622.6706 | 47.88  | 11.59 | 15.56 | 15.56 | 15.93 | 1.41 |
| 622.7552 | 48.82  | 13.21 | 16.76 | 16.96 | 17.32 | 1.57 |
| 622.8265 | 279.38 | 16.52 | 14.66 | 14.52 | 15.56 | 0.67 |
| 622.9385 | 53.02  | 17.14 | 16.74 | 17.61 | 15.49 | 0.13 |
| 622.9413 | 279.65 | 15.31 | 14.73 | 15.12 | 15.45 | 0.14 |
| 623.0682 | 281.3  | 16.29 | 18.32 | 17.88 | 17.71 | 0.75 |
| 623.1926 | 281.02 | 15.84 | 19.34 | 19.10 | 18.19 | 1.28 |
| 623.3180 | 279.41 | 16.20 | 19.60 | 19.37 | 18.58 | 1.33 |
| 623.4418 | 281.42 | 15.74 | 19.63 | 19.34 | 18.67 | 1.27 |
| 623.5075 | 50.59  | 16.00 | 13.64 | 14.90 | 16.47 | 0.47 |
| 623.5684 | 281.2  | 15.08 | 19.15 | 18.97 | 17.93 | 1.52 |
| 623.6934 | 281.48 | 16.21 | 18.40 | 18.08 | 17.79 | 0.93 |
| 623.7523 | 49.52  | 13.23 | 14.88 | 15.27 | 14.88 | 0.80 |
| 623.8190 | 280.08 | 15.31 | 15.19 | 15.39 | 15.45 | 0.00 |
| 623.8697 | 50.76  | 14.84 | 13.22 | 14.25 | 13.21 | 0.40 |
| 623.8950 | 270.84 | 15.54 | 14.89 | 15.46 | 15.56 | 0.24 |
| 623.9449 | 52.32  | 15.39 | 15.64 | 16.65 | 14.58 | 0.20 |

|          |        |       |       |       |       |      |
|----------|--------|-------|-------|-------|-------|------|
| 623.9470 | 281.25 | 14.65 | 14.93 | 14.80 | 15.06 | 0.09 |
| 624.0356 | 276.28 | 16.26 | 18.52 | 18.62 | 18.58 | 0.95 |
| 624.0668 | 61.54  | 13.21 | 11.45 | 13.46 | 10.76 | 0.29 |
| 624.0720 | 280.25 | 16.28 | 14.55 | 14.76 | 14.80 | 0.58 |
| 624.0943 | 264.48 | 11.89 | 16.11 | 16.60 | 15.78 | 1.13 |
| 624.1791 | 276.36 | 16.45 | 18.77 | 18.87 | 18.21 | 0.94 |
| 624.3223 | 276.59 | 16.89 | 18.62 | 18.43 | 18.48 | 0.78 |
| 624.4159 | 281.94 | 16.25 | 14.18 | 13.48 | 14.99 | 0.72 |
| 624.4644 | 275.42 | 16.89 | 17.85 | 18.08 | 17.57 | 0.47 |
| 624.5285 | 47.3   | 16.93 | 17.05 | 17.01 | 17.43 | 0.11 |
| 624.5385 | 281.81 | 14.23 | 15.23 | 14.39 | 16.15 | 0.20 |
| 624.5733 | 44.74  | 13.41 | 12.15 | 12.16 | 12.66 | 0.31 |
| 624.6125 | 273.03 | 13.98 | 14.57 | 15.07 | 15.24 | 0.27 |
| 624.6176 | 46.7   | 17.94 | 18.69 | 18.71 | 18.57 | 0.91 |
| 624.7502 | 49.67  | 10.83 | 16.88 | 17.21 | 16.77 | 1.67 |
| 624.7513 | 275.2  | 16.06 | 15.20 | 15.59 | 15.92 | 0.27 |
| 624.8217 | 278.03 | 15.67 | 14.57 | 14.47 | 15.21 | 0.44 |
| 624.9443 | 52.56  | 13.53 | 13.94 | 14.81 | 12.66 | 0.20 |
| 624.9463 | 277.56 | 16.15 | 14.72 | 14.58 | 15.00 | 0.70 |
| 625.0384 | 270.43 | 16.95 | 14.95 | 15.13 | 15.71 | 0.68 |
| 625.0803 | 283.76 | 16.71 | 15.03 | 15.13 | 15.67 | 0.49 |
| 625.1212 | 284.38 | 17.09 | 15.06 | 15.39 | 15.98 | 0.61 |
| 625.1634 | 283.42 | 16.28 | 15.46 | 15.31 | 15.89 | 0.26 |
| 625.2045 | 283.57 | 17.07 | 15.47 | 15.35 | 16.28 | 0.53 |
| 625.2468 | 283.69 | 17.06 | 15.23 | 15.04 | 15.85 | 0.60 |
| 625.2872 | 283.29 | 16.64 | 14.94 | 14.52 | 15.27 | 0.54 |
| 625.3155 | 281.67 | 15.31 | 14.29 | 14.76 | 14.78 | 0.61 |
| 625.3277 | 282.17 | 17.16 | 15.04 | 15.26 | 15.87 | 0.73 |
| 625.4135 | 50.5   | 12.30 | 11.63 | 10.51 | 13.31 | 0.29 |
| 625.6178 | 48.27  | 11.24 | 12.09 | 12.42 | 11.63 | 0.36 |
| 625.7500 | 46.71  | 10.22 | 12.66 | 13.52 | 12.19 | 0.85 |
| 625.8107 | 279.1  | 15.72 | 17.90 | 17.98 | 16.98 | 1.06 |
| 625.8388 | 52.98  | 14.26 | 12.17 | 12.23 | 12.89 | 0.57 |
| 625.9099 | 279.15 | 15.05 | 13.79 | 13.00 | 13.69 | 0.47 |
| 625.9363 | 277.35 | 15.64 | 19.07 | 18.96 | 17.96 | 1.54 |
| 626.0605 | 279.39 | 15.26 | 19.47 | 19.58 | 18.30 | 1.52 |
| 626.0801 | 56.46  | 16.15 | 18.15 | 16.85 | 18.84 | 0.49 |
| 626.1871 | 277.26 | 16.09 | 19.54 | 19.54 | 18.59 | 1.56 |
| 626.3173 | 279.07 | 16.80 | 19.10 | 19.36 | 18.54 | 1.07 |
| 626.4377 | 279.03 | 15.94 | 18.49 | 18.59 | 17.87 | 1.42 |
| 626.4806 | 46.41  | 16.20 | 15.23 | 14.82 | 15.15 | 0.57 |
| 626.5180 | 51.16  | 14.91 | 18.30 | 18.30 | 17.44 | 1.37 |
| 626.5634 | 278.76 | 15.59 | 17.58 | 17.41 | 16.83 | 0.93 |
| 626.6157 | 46.91  | 17.14 | 18.48 | 18.34 | 18.18 | 0.85 |
| 626.6621 | 46.92  | 10.20 | 11.77 | 13.17 | 12.10 | 0.68 |
| 626.6907 | 278.43 | 12.01 | 14.62 | 15.07 | 15.06 | 0.87 |
| 626.6988 | 45.69  | 15.14 | 18.68 | 18.42 | 18.76 | 1.55 |
| 626.7472 | 47.2   | 12.41 | 16.95 | 16.66 | 16.05 | 1.67 |
| 626.8176 | 277.25 | 13.98 | 14.62 | 15.14 | 14.97 | 0.38 |
| 626.9498 | 52.25  | 19.89 | 21.73 | 21.85 | 20.28 | 0.89 |
| 627.1221 | 57.92  | 14.15 | 17.37 | 17.36 | 16.65 | 1.40 |
| 627.2002 | 279.53 | 15.13 | 18.29 | 18.22 | 17.64 | 1.35 |
| 627.4714 | 28     | 13.06 | 13.86 | 13.68 | 12.96 | 0.16 |
| 627.5138 | 53.64  | 11.12 | 16.10 | 16.41 | 14.22 | 1.13 |
| 627.5349 | 22.71  | 16.36 | 7.15  | 6.75  | 11.35 | 1.64 |
| 627.6112 | 48.62  | 13.55 | 12.86 | 12.81 | 12.58 | 0.45 |

|          |        |       |       |       |       |      |
|----------|--------|-------|-------|-------|-------|------|
| 627.6655 | 278.96 | 13.73 | 14.86 | 14.81 | 13.69 | 0.38 |
| 627.6986 | 46.11  | 10.23 | 12.22 | 12.72 | 14.14 | 0.87 |
| 627.8221 | 48.36  | 16.39 | 17.78 | 17.54 | 17.29 | 0.79 |
| 627.8315 | 278.42 | 15.58 | 15.50 | 15.63 | 15.27 | 0.04 |
| 627.9504 | 52.88  | 16.60 | 18.46 | 18.64 | 17.13 | 0.95 |
| 628.0758 | 279.7  | 14.04 | 14.87 | 14.49 | 15.03 | 0.25 |
| 628.1395 | 194.74 | 6.33  | 10.53 | 13.29 | 9.53  | 1.21 |
| 628.2033 | 281.25 | 14.88 | 13.73 | 14.87 | 14.90 | 0.25 |
| 628.2933 | 106.38 | 8.04  | 12.19 | 12.55 | 12.53 | 1.20 |
| 628.3285 | 278.91 | 15.99 | 15.00 | 14.91 | 15.39 | 0.48 |
| 628.4780 | 46.47  | 16.97 | 16.47 | 16.15 | 16.18 | 0.41 |
| 628.5354 | 38.63  | 14.82 | 7.16  | 7.82  | 9.47  | 1.64 |
| 628.5682 | 46.55  | 15.20 | 16.18 | 15.97 | 15.79 | 0.57 |
| 628.6162 | 54.5   | 16.10 | 17.28 | 17.25 | 17.03 | 0.99 |
| 628.6976 | 46.1   | 15.47 | 18.63 | 18.46 | 18.81 | 1.63 |
| 628.9462 | 52.56  | 17.46 | 19.31 | 19.52 | 18.14 | 1.02 |
| 629.3270 | 278.42 | 15.97 | 14.47 | 14.84 | 15.30 | 0.63 |
| 629.5184 | 53.52  | 14.32 | 18.89 | 18.10 | 16.73 | 1.13 |
| 629.6078 | 48.42  | 12.56 | 11.51 | 11.74 | 11.02 | 0.47 |
| 629.6982 | 48.84  | 12.70 | 15.18 | 15.40 | 15.23 | 1.33 |
| 629.8160 | 48.93  | 16.18 | 16.14 | 16.36 | 15.73 | 0.01 |
| 629.9491 | 52.64  | 11.77 | 12.81 | 12.35 | 12.03 | 0.30 |
| 630.0197 | 53.48  | 11.41 | 16.69 | 15.04 | 14.71 | 1.25 |
| 630.0819 | 302.09 | 16.58 | 16.86 | 16.54 | 15.04 | 0.05 |
| 630.3190 | 44.02  | 8.68  | 8.00  | 10.67 | 9.53  | 0.20 |
| 630.3307 | 280.37 | 15.63 | 14.52 | 14.86 | 15.32 | 0.43 |
| 630.4240 | 45.13  | 17.03 | 9.47  | 9.84  | 9.96  | 1.75 |
| 630.4751 | 46.51  | 16.57 | 15.92 | 15.20 | 15.47 | 0.43 |
| 630.5157 | 47.9   | 14.89 | 17.69 | 15.67 | 14.58 | 0.38 |
| 630.5654 | 46.88  | 16.91 | 18.08 | 18.05 | 17.54 | 0.92 |
| 630.6977 | 47.09  | 13.92 | 16.87 | 16.62 | 17.24 | 1.34 |
| 630.7010 | 272.6  | 13.78 | 14.93 | 15.40 | 15.14 | 0.57 |
| 630.7886 | 47.12  | 11.44 | 13.68 | 15.14 | 15.05 | 0.92 |
| 630.9021 | 271.97 | 15.67 | 15.14 | 15.39 | 15.71 | 0.19 |
| 631.0158 | 54.2   | 11.48 | 11.86 | 10.74 | 11.57 | 0.04 |
| 631.0653 | 290.44 | 16.11 | 14.64 | 15.26 | 15.07 | 0.54 |
| 631.1027 | 274.48 | 14.99 | 13.29 | 14.50 | 14.35 | 0.42 |
| 631.1134 | 44.12  | 14.52 | 13.18 | 14.10 | 14.25 | 0.28 |
| 631.1491 | 289.83 | 16.13 | 15.24 | 17.19 | 16.00 | 0.03 |
| 631.3189 | 281.39 | 14.56 | 14.30 | 14.72 | 14.99 | 0.00 |
| 631.6906 | 49.23  | 10.65 | 10.86 | 11.33 | 10.56 | 0.24 |
| 631.7853 | 49.35  | 13.39 | 13.75 | 14.68 | 13.98 | 0.41 |
| 631.8131 | 49.78  | 13.31 | 12.99 | 12.10 | 10.68 | 0.27 |
| 631.9020 | 53.48  | 17.18 | 16.63 | 17.15 | 14.23 | 0.24 |
| 632.1062 | 98.81  | 11.10 | 10.72 | 11.60 | 10.12 | 0.04 |
| 632.1308 | 230.56 | 7.54  | 12.68 | 13.86 | 13.45 | 1.48 |
| 632.3332 | 280.04 | 15.95 | 14.62 | 14.72 | 15.45 | 0.57 |
| 632.4148 | 40.21  | 19.18 | 18.19 | 15.36 | 17.07 | 0.98 |
| 632.4732 | 46.65  | 14.75 | 13.83 | 12.63 | 12.60 | 0.47 |
| 632.5247 | 22.72  | 17.07 | 8.86  | 10.15 | 11.38 | 1.58 |
| 632.5632 | 47.12  | 16.95 | 18.12 | 18.08 | 17.63 | 0.96 |
| 632.6028 | 44.96  | 13.00 | 14.20 | 14.89 | 13.52 | 0.43 |
| 632.6513 | 47.2   | 16.51 | 17.55 | 17.62 | 17.31 | 0.88 |
| 632.7860 | 47.8   | 10.00 | 13.01 | 14.07 | 14.11 | 1.01 |
| 632.9137 | 29.61  | 12.84 | 16.63 | 13.68 | 14.43 | 0.80 |
| 633.0259 | 89.38  | 15.66 | 11.77 | 13.74 | 13.39 | 0.81 |

|          |        |       |       |       |       |      |
|----------|--------|-------|-------|-------|-------|------|
| 633.1540 | 71.87  | 14.99 | 15.98 | 16.55 | 13.70 | 0.32 |
| 633.3310 | 279.05 | 15.85 | 14.58 | 14.55 | 15.21 | 0.63 |
| 633.4140 | 33.51  | 14.93 | 20.48 | 18.58 | 19.11 | 1.72 |
| 633.5281 | 22.27  | 15.57 | 7.56  | 8.69  | 9.58  | 1.66 |
| 633.7816 | 49.62  | 11.65 | 14.44 | 15.19 | 14.70 | 1.20 |
| 633.9212 | 28     | 13.89 | 19.82 | 17.77 | 18.52 | 1.77 |
| 634.3335 | 279.15 | 15.71 | 15.51 | 15.20 | 15.49 | 0.16 |
| 634.4202 | 38.6   | 19.30 | 18.15 | 15.31 | 16.92 | 0.88 |
| 634.5016 | 278.3  | 13.58 | 14.61 | 14.63 | 14.74 | 0.48 |
| 634.5036 | 55.35  | 14.07 | 15.80 | 16.86 | 15.09 | 0.78 |
| 634.5401 | 21.26  | 19.29 | 12.88 | 14.41 | 15.12 | 1.64 |
| 634.5613 | 46.96  | 14.60 | 17.22 | 17.06 | 16.31 | 0.90 |
| 634.6003 | 44.74  | 13.11 | 13.28 | 13.79 | 12.97 | 0.10 |
| 634.6380 | 45.54  | 13.66 | 13.00 | 12.33 | 11.81 | 0.36 |
| 634.6483 | 47.22  | 16.84 | 18.52 | 18.58 | 18.42 | 1.54 |
| 634.7741 | 50.11  | 11.10 | 12.81 | 12.88 | 12.06 | 0.67 |
| 634.9359 | 51.61  | 14.26 | 16.39 | 16.86 | 15.58 | 0.94 |
| 635.1007 | 292.02 | 11.19 | 17.57 | 17.74 | 15.51 | 1.49 |
| 635.1416 | 267.57 | 15.91 | 16.01 | 17.17 | 16.29 | 0.29 |
| 635.1686 | 81.82  | 11.67 | 15.31 | 15.06 | 12.70 | 0.73 |
| 635.3381 | 278.41 | 16.44 | 14.41 | 14.71 | 15.26 | 0.87 |
| 635.4980 | 53.75  | 12.20 | 12.25 | 12.87 | 12.18 | 0.12 |
| 635.5435 | 21.74  | 17.61 | 9.33  | 11.61 | 12.77 | 1.54 |
| 635.9367 | 52.56  | 12.73 | 14.01 | 14.16 | 11.30 | 0.29 |
| 636.0845 | 302.39 | 14.76 | 18.69 | 17.77 | 17.00 | 1.38 |
| 636.1047 | 293.42 | 14.91 | 14.15 | 14.46 | 13.68 | 0.35 |
| 636.1446 | 226.26 | 9.74  | 14.33 | 14.01 | 14.45 | 1.15 |
| 636.3369 | 279.76 | 15.81 | 14.61 | 14.89 | 15.34 | 0.51 |
| 636.4165 | 44.33  | 18.96 | 13.96 | 13.66 | 14.80 | 1.22 |
| 636.5116 | 46.77  | 16.53 | 16.96 | 16.77 | 16.64 | 0.22 |
| 636.5594 | 40.3   | 18.12 | 13.83 | 13.63 | 14.92 | 1.43 |
| 636.6468 | 47.43  | 14.96 | 17.97 | 18.05 | 17.62 | 1.26 |
| 636.7374 | 47.93  | 10.54 | 16.15 | 16.20 | 16.62 | 1.34 |
| 636.8562 | 53.38  | 15.76 | 13.42 | 13.88 | 13.59 | 0.73 |
| 636.9155 | 52.23  | 17.92 | 14.76 | 16.28 | 13.70 | 0.77 |
| 637.0862 | 301.84 | 14.59 | 15.31 | 13.42 | 13.24 | 0.09 |
| 637.1566 | 64.28  | 15.34 | 19.09 | 17.18 | 17.18 | 0.81 |
| 637.3348 | 280.44 | 16.40 | 15.40 | 15.33 | 15.85 | 0.42 |
| 637.5054 | 53.32  | 15.64 | 18.31 | 18.46 | 17.13 | 1.43 |
| 637.5596 | 24.12  | 16.78 | 7.16  | 7.60  | 9.42  | 1.84 |
| 637.6208 | 286.37 | 14.44 | 13.69 | 14.53 | 13.13 | 0.20 |
| 637.6447 | 52.37  | 10.89 | 12.01 | 12.23 | 12.60 | 0.44 |
| 637.7333 | 49.31  | 12.75 | 11.60 | 11.93 | 11.96 | 0.67 |
| 637.7461 | 48.17  | 7.87  | 8.95  | 8.36  | 10.34 | 0.31 |
| 637.7464 | 281.23 | 15.35 | 14.41 | 14.76 | 14.78 | 0.44 |
| 637.8529 | 50.97  | 15.07 | 17.11 | 17.07 | 16.33 | 1.10 |
| 637.9579 | 283.5  | 15.05 | 15.03 | 15.13 | 14.82 | 0.01 |
| 638.0059 | 53.25  | 12.49 | 15.72 | 15.56 | 14.44 | 1.07 |
| 638.0751 | 282.32 | 15.27 | 14.61 | 15.17 | 14.76 | 0.21 |
| 638.1596 | 64.22  | 14.61 | 16.14 | 13.50 | 14.68 | 0.11 |
| 638.3053 | 282    | 15.74 | 14.72 | 14.60 | 14.41 | 0.59 |
| 638.3365 | 280.66 | 16.03 | 14.66 | 14.88 | 15.49 | 0.54 |
| 638.3426 | 55.78  | 10.41 | 12.48 | 13.96 | 12.92 | 0.80 |
| 638.4132 | 44.95  | 18.60 | 13.93 | 12.57 | 14.08 | 1.48 |
| 638.4592 | 282.14 | 15.99 | 15.02 | 15.01 | 14.71 | 0.47 |
| 638.5083 | 49.19  | 16.81 | 18.78 | 18.92 | 17.87 | 0.91 |

|          |        |       |       |       |       |      |
|----------|--------|-------|-------|-------|-------|------|
| 638.5975 | 46.75  | 15.02 | 16.97 | 16.99 | 16.38 | 0.98 |
| 638.6093 | 284.84 | 15.22 | 14.07 | 12.62 | 13.93 | 0.48 |
| 638.6462 | 47.81  | 13.37 | 15.69 | 15.65 | 16.08 | 1.19 |
| 638.7204 | 49.51  | 12.35 | 12.96 | 13.18 | 12.56 | 0.31 |
| 638.7319 | 48.32  | 13.28 | 16.97 | 16.99 | 17.11 | 1.69 |
| 638.8458 | 284.04 | 15.43 | 14.39 | 14.62 | 14.33 | 0.40 |
| 638.8531 | 55.48  | 14.05 | 13.38 | 14.15 | 13.57 | 0.14 |
| 638.9148 | 44.42  | 16.16 | 15.29 | 14.57 | 13.66 | 0.54 |
| 639.0966 | 272.35 | 9.62  | 15.95 | 17.10 | 15.05 | 1.50 |
| 639.3393 | 279.29 | 15.38 | 15.03 | 15.02 | 14.84 | 0.18 |
| 639.4322 | 284.74 | 14.30 | 14.19 | 13.36 | 13.49 | 0.18 |
| 639.4942 | 33.06  | 17.33 | 9.40  | 10.77 | 11.82 | 1.56 |
| 639.5451 | 284.48 | 15.68 | 14.90 | 15.16 | 14.82 | 0.37 |
| 639.6547 | 283.81 | 15.45 | 14.08 | 14.41 | 14.19 | 0.60 |
| 639.6872 | 280.91 | 15.68 | 15.35 | 15.29 | 15.37 | 0.21 |
| 639.7263 | 49.41  | 12.53 | 13.05 | 13.09 | 12.76 | 0.30 |
| 639.7519 | 277.98 | 14.77 | 13.96 | 13.80 | 14.39 | 0.41 |
| 639.7634 | 281.26 | 15.88 | 16.25 | 15.95 | 16.07 | 0.10 |
| 639.8335 | 278.84 | 15.95 | 16.57 | 16.14 | 16.47 | 0.20 |
| 639.8502 | 50.62  | 14.55 | 17.32 | 17.28 | 16.82 | 1.44 |
| 639.9033 | 278.89 | 16.23 | 17.16 | 16.75 | 16.38 | 0.33 |
| 639.9543 | 53.18  | 14.62 | 17.12 | 14.88 | 15.71 | 0.45 |
| 639.9748 | 278.39 | 15.89 | 16.68 | 16.48 | 16.17 | 0.36 |
| 640.0390 | 62.64  | 12.18 | 11.58 | 12.39 | 11.81 | 0.10 |
| 640.0461 | 278.01 | 14.52 | 16.44 | 15.92 | 16.09 | 0.57 |
| 640.1216 | 278.62 | 15.84 | 14.84 | 15.25 | 15.64 | 0.44 |
| 640.1934 | 240.22 | 12.64 | 16.48 | 17.24 | 15.12 | 1.21 |
| 640.3306 | 279.72 | 15.52 | 14.84 | 14.85 | 15.38 | 0.32 |
| 640.3890 | 51.83  | 12.05 | 13.92 | 13.22 | 13.29 | 0.54 |
| 640.4106 | 45.03  | 17.29 | 9.87  | 9.42  | 10.54 | 1.74 |
| 640.4542 | 46.92  | 16.36 | 12.32 | 10.16 | 12.90 | 1.16 |
| 640.5057 | 48.44  | 17.76 | 19.48 | 18.82 | 18.65 | 0.80 |
| 640.5945 | 46.93  | 16.62 | 18.38 | 18.41 | 17.84 | 1.15 |
| 640.6072 | 280.03 | 12.32 | 13.93 | 12.29 | 13.03 | 0.21 |
| 640.6338 | 44.64  | 12.65 | 13.24 | 14.14 | 12.86 | 0.30 |
| 640.6954 | 244.9  | 11.64 | 15.05 | 15.19 | 13.29 | 0.70 |
| 640.7245 | 49.14  | 14.15 | 16.92 | 17.24 | 16.67 | 1.46 |
| 640.8213 | 52.12  | 11.89 | 11.40 | 11.08 | 13.54 | 0.08 |
| 640.8993 | 29.41  | 12.24 | 14.21 | 13.89 | 14.34 | 0.77 |
| 640.9070 | 40.2   | 13.58 | 14.26 | 14.08 | 15.13 | 0.41 |
| 640.9525 | 53.29  | 14.19 | 16.05 | 13.70 | 14.99 | 0.28 |
| 641.0133 | 53.46  | 11.87 | 15.70 | 14.13 | 13.99 | 0.91 |
| 641.1946 | 239.16 | 8.32  | 11.92 | 12.42 | 11.59 | 0.92 |
| 641.3367 | 280.49 | 16.02 | 14.39 | 14.65 | 15.09 | 0.54 |
| 641.3863 | 51.85  | 11.82 | 12.78 | 12.79 | 12.72 | 0.38 |
| 641.4056 | 28.35  | 15.18 | 16.86 | 14.61 | 16.11 | 0.34 |
| 641.5107 | 38.09  | 17.98 | 17.62 | 16.89 | 17.66 | 0.35 |
| 641.7243 | 49.18  | 7.93  | 11.81 | 12.40 | 11.15 | 1.22 |
| 641.8115 | 50.6   | 12.19 | 11.33 | 11.94 | 11.55 | 0.23 |
| 641.8482 | 50.76  | 12.74 | 14.27 | 13.93 | 14.05 | 0.63 |
| 641.9075 | 29.91  | 14.23 | 14.45 | 13.46 | 14.61 | 0.07 |
| 642.0059 | 53.75  | 10.91 | 11.37 | 11.07 | 11.49 | 0.15 |
| 642.1939 | 277.19 | 16.13 | 15.60 | 15.39 | 15.44 | 0.34 |
| 642.3348 | 277.98 | 16.37 | 18.05 | 17.66 | 17.59 | 0.66 |
| 642.4515 | 44.18  | 17.78 | 15.09 | 14.04 | 15.22 | 0.83 |
| 642.4818 | 274.92 | 15.13 | 15.66 | 15.57 | 15.55 | 0.25 |



|          |        |       |       |       |       |      |
|----------|--------|-------|-------|-------|-------|------|
| 642.4922 | 50.27  | 14.82 | 12.55 | 13.52 | 13.65 | 0.72 |
| 642.5118 | 36.24  | 17.07 | 13.36 | 13.79 | 14.76 | 1.12 |
| 642.5804 | 45.08  | 13.32 | 11.87 | 12.64 | 13.64 | 0.40 |
| 642.5925 | 46.82  | 16.78 | 18.23 | 18.17 | 18.02 | 1.12 |
| 642.5965 | 280.95 | 13.67 | 14.83 | 14.88 | 15.07 | 0.33 |
| 642.6255 | 274.45 | 15.15 | 14.94 | 14.92 | 15.33 | 0.09 |
| 642.6305 | 44.53  | 14.11 | 15.25 | 15.67 | 15.11 | 0.66 |
| 642.6693 | 45.18  | 11.28 | 11.04 | 11.01 | 12.85 | 0.01 |
| 642.6821 | 47.55  | 15.44 | 17.26 | 17.19 | 17.36 | 1.27 |
| 642.7195 | 48.81  | 14.04 | 15.78 | 16.29 | 14.07 | 0.59 |
| 642.7651 | 273.94 | 14.51 | 15.31 | 15.60 | 15.49 | 0.49 |
| 642.8116 | 51.04  | 10.65 | 13.34 | 13.21 | 14.38 | 0.90 |
| 642.9106 | 277.75 | 15.65 | 15.11 | 14.38 | 14.78 | 0.32 |
| 642.9226 | 51.39  | 19.25 | 19.90 | 20.65 | 18.84 | 0.50 |
| 643.0954 | 58.04  | 11.01 | 11.41 | 11.80 | 12.21 | 0.25 |
| 643.3373 | 279.7  | 16.29 | 14.53 | 14.98 | 15.40 | 0.91 |
| 643.3394 | 52.52  | 12.01 | 12.79 | 13.33 | 13.36 | 0.47 |
| 643.5292 | 22.87  | 17.74 | 12.88 | 14.50 | 15.03 | 1.33 |
| 643.7894 | 50.04  | 15.47 | 9.95  | 9.89  | 10.31 | 1.39 |
| 643.9249 | 52.35  | 15.23 | 15.60 | 16.46 | 13.98 | 0.15 |
| 644.0536 | 277.47 | 15.09 | 14.12 | 14.32 | 14.63 | 0.33 |
| 644.3369 | 279.21 | 16.13 | 14.48 | 14.85 | 15.38 | 0.79 |
| 644.4497 | 45.49  | 18.59 | 16.40 | 15.68 | 16.03 | 0.96 |
| 644.4602 | 46.67  | 13.20 | 11.35 | 11.62 | 11.76 | 0.68 |
| 644.5397 | 38.72  | 16.54 | 15.35 | 14.93 | 15.78 | 0.56 |
| 644.5807 | 45.23  | 11.23 | 12.21 | 12.64 | 12.50 | 0.63 |
| 644.5905 | 46.88  | 14.97 | 17.11 | 16.99 | 16.89 | 1.10 |
| 644.6317 | 44.65  | 11.08 | 13.03 | 13.85 | 12.72 | 0.66 |
| 644.6786 | 47.46  | 15.41 | 17.90 | 17.91 | 17.92 | 1.53 |
| 644.8025 | 50.59  | 11.76 | 12.48 | 13.01 | 12.76 | 0.55 |
| 644.9195 | 52.23  | 17.00 | 17.71 | 18.49 | 16.40 | 0.45 |
| 645.3389 | 280.84 | 15.96 | 14.60 | 15.12 | 15.34 | 0.57 |
| 645.4204 | 27.05  | 10.41 | 16.70 | 13.94 | 15.94 | 1.44 |
| 645.4923 | 53.27  | 15.56 | 16.62 | 17.61 | 15.59 | 0.73 |
| 645.5475 | 29.75  | 18.39 | 14.13 | 15.40 | 15.90 | 1.13 |
| 645.6692 | 48.82  | 10.78 | 11.43 | 11.61 | 10.62 | 0.26 |
| 645.8979 | 55.58  | 17.06 | 11.86 | 10.04 | 11.75 | 1.36 |
| 645.9019 | 280.1  | 15.88 | 12.47 | 13.33 | 12.42 | 0.73 |
| 645.9193 | 27.02  | 13.37 | 16.58 | 13.48 | 15.61 | 0.85 |
| 645.9303 | 280.82 | 15.44 | 14.64 | 15.78 | 15.86 | 0.07 |
| 645.9951 | 52.33  | 12.09 | 9.82  | 12.29 | 10.16 | 0.38 |
| 646.0620 | 279.86 | 12.61 | 14.83 | 14.98 | 14.64 | 0.66 |
| 646.1957 | 136.17 | 6.33  | 12.55 | 13.75 | 10.45 | 1.72 |
| 646.2028 | 281.05 | 13.74 | 14.86 | 15.23 | 14.92 | 0.52 |
| 646.3390 | 279.32 | 16.20 | 13.97 | 14.49 | 15.00 | 0.99 |
| 646.4277 | 27.33  | 13.38 | 20.14 | 17.98 | 19.25 | 1.84 |
| 646.4474 | 45.61  | 18.45 | 15.20 | 15.28 | 15.34 | 1.12 |
| 646.4912 | 53.13  | 13.53 | 12.61 | 13.61 | 12.61 | 0.25 |
| 646.5426 | 43.07  | 17.72 | 17.68 | 17.42 | 17.53 | 0.14 |
| 646.6778 | 47.76  | 12.46 | 16.65 | 16.59 | 16.99 | 1.52 |
| 646.7714 | 38.12  | 11.50 | 12.72 | 12.99 | 14.75 | 0.49 |
| 646.8905 | 53.24  | 15.11 | 10.76 | 11.67 | 12.44 | 1.27 |
| 646.9292 | 27.81  | 14.91 | 19.55 | 17.60 | 18.66 | 1.74 |
| 647.0297 | 287.43 | 13.05 | 15.26 | 14.95 | 15.25 | 0.68 |
| 647.1313 | 68.74  | 10.38 | 11.31 | 12.89 | 11.31 | 0.53 |
| 647.3390 | 280.88 | 16.24 | 14.43 | 14.81 | 15.26 | 0.81 |

|          |        |       |       |       |       |      |
|----------|--------|-------|-------|-------|-------|------|
| 647.4582 | 23.81  | 17.31 | 11.28 | 11.72 | 12.52 | 1.64 |
| 647.7592 | 49.15  | 9.73  | 12.15 | 12.39 | 12.31 | 0.88 |
| 647.8792 | 52.29  | 16.54 | 14.89 | 15.60 | 15.01 | 0.60 |
| 647.9401 | 42.43  | 16.44 | 19.54 | 18.38 | 19.12 | 1.55 |
| 648.0618 | 279.59 | 12.91 | 14.55 | 14.62 | 14.80 | 0.54 |
| 648.0621 | 54.1   | 19.17 | 21.59 | 21.27 | 21.05 | 1.20 |
| 648.1195 | 61.44  | 13.85 | 17.35 | 17.71 | 16.91 | 1.25 |
| 648.3370 | 281.21 | 16.03 | 14.50 | 14.92 | 15.25 | 0.74 |
| 648.4469 | 41.06  | 17.80 | 17.93 | 15.05 | 17.08 | 0.45 |
| 648.4964 | 52.9   | 15.96 | 18.56 | 18.60 | 17.44 | 1.28 |
| 648.5515 | 282.01 | 13.75 | 14.09 | 13.00 | 13.47 | 0.04 |
| 648.5644 | 54.24  | 11.04 | 14.37 | 12.08 | 15.74 | 0.56 |
| 648.6181 | 279.57 | 15.46 | 14.91 | 15.06 | 15.58 | 0.20 |
| 648.6269 | 46.4   | 15.08 | 17.12 | 17.22 | 17.26 | 1.50 |
| 648.7601 | 48.35  | 10.20 | 11.29 | 11.48 | 13.22 | 0.62 |
| 648.7608 | 274.95 | 12.98 | 14.68 | 14.81 | 14.80 | 0.55 |
| 648.9397 | 52.32  | 13.99 | 17.44 | 16.77 | 17.15 | 1.01 |
| 648.9400 | 281.76 | 13.96 | 14.43 | 14.11 | 15.35 | 0.15 |
| 648.9937 | 55.22  | 13.95 | 13.68 | 13.87 | 12.93 | 0.13 |
| 649.0785 | 169.48 | 7.34  | 13.23 | 11.00 | 10.76 | 1.09 |
| 649.1851 | 277.47 | 14.93 | 13.97 | 14.38 | 14.84 | 0.27 |
| 649.2203 | 251.92 | 13.96 | 12.92 | 12.67 | 13.19 | 0.28 |
| 649.3411 | 280.03 | 16.46 | 14.57 | 15.01 | 15.26 | 0.72 |
| 649.3796 | 51.82  | 11.87 | 12.04 | 12.28 | 11.81 | 0.08 |
| 649.4374 | 46.08  | 11.48 | 11.55 | 9.96  | 12.40 | 0.14 |
| 649.4991 | 52.89  | 12.81 | 16.15 | 15.89 | 15.80 | 1.07 |
| 649.5582 | 281.26 | 14.08 | 13.75 | 12.54 | 14.66 | 0.16 |
| 649.5617 | 53.17  | 10.41 | 12.50 | 10.64 | 13.48 | 0.37 |
| 649.7272 | 281.2  | 16.51 | 14.38 | 13.72 | 14.37 | 0.79 |
| 649.7594 | 49.48  | 10.32 | 11.65 | 12.29 | 12.47 | 0.74 |
| 649.8772 | 52.2   | 14.73 | 12.25 | 12.46 | 13.02 | 1.19 |
| 649.9402 | 50.86  | 10.51 | 13.50 | 11.99 | 13.24 | 0.61 |
| 650.0578 | 53.94  | 16.51 | 19.13 | 18.70 | 18.62 | 1.28 |
| 650.3428 | 280.92 | 16.75 | 15.34 | 15.67 | 15.93 | 0.56 |
| 650.3754 | 51.27  | 12.76 | 12.52 | 12.47 | 12.50 | 0.10 |
| 650.4386 | 30.62  | 16.95 | 14.85 | 15.72 | 14.79 | 0.67 |
| 650.4837 | 51.04  | 17.68 | 13.78 | 13.49 | 15.01 | 1.20 |
| 650.5363 | 45.95  | 16.46 | 17.15 | 16.88 | 16.84 | 0.40 |
| 650.6244 | 46.93  | 15.93 | 18.29 | 18.35 | 18.13 | 1.40 |
| 650.6624 | 44.7   | 13.02 | 13.21 | 14.42 | 13.63 | 0.33 |
| 650.7464 | 267.54 | 15.70 | 15.24 | 15.50 | 15.39 | 0.17 |
| 650.8200 | 265.47 | 16.26 | 15.90 | 16.21 | 16.52 | 0.08 |
| 650.9019 | 265.94 | 16.01 | 15.26 | 15.93 | 15.58 | 0.26 |
| 650.9748 | 266.1  | 11.68 | 16.56 | 16.81 | 16.06 | 1.13 |
| 651.0392 | 43.14  | 16.20 | 15.75 | 16.11 | 17.83 | 0.00 |
| 651.0471 | 268.56 | 15.58 | 15.46 | 15.79 | 15.81 | 0.03 |
| 651.0634 | 54.22  | 11.49 | 11.97 | 11.66 | 12.67 | 0.18 |
| 651.0831 | 284.38 | 16.13 | 15.11 | 15.53 | 16.31 | 0.27 |
| 651.1045 | 263.2  | 17.45 | 16.78 | 18.48 | 17.58 | 0.05 |
| 651.1311 | 266.24 | 13.46 | 16.58 | 16.77 | 16.48 | 0.92 |
| 651.1436 | 82.84  | 13.10 | 12.92 | 13.04 | 10.44 | 0.12 |
| 651.2067 | 266.25 | 16.27 | 16.27 | 16.44 | 16.86 | 0.07 |
| 651.2813 | 267.91 | 15.39 | 15.13 | 15.48 | 14.98 | 0.08 |
| 651.3434 | 280.11 | 16.25 | 15.13 | 15.16 | 15.82 | 0.40 |
| 651.3560 | 269.48 | 15.07 | 14.74 | 15.14 | 14.87 | 0.09 |
| 651.4324 | 277.72 | 16.01 | 14.39 | 14.65 | 15.56 | 0.46 |

|          |        |       |       |       |       |      |
|----------|--------|-------|-------|-------|-------|------|
| 651.5010 | 53.23  | 14.83 | 18.77 | 17.29 | 17.36 | 1.01 |
| 651.6044 | 279.77 | 16.30 | 15.33 | 14.62 | 15.79 | 0.37 |
| 651.6473 | 282.06 | 16.78 | 15.08 | 14.33 | 15.79 | 0.57 |
| 651.6916 | 283.17 | 16.86 | 15.70 | 14.65 | 16.27 | 0.48 |
| 651.7325 | 281.92 | 16.17 | 15.42 | 15.51 | 15.91 | 0.21 |
| 651.7798 | 282.74 | 16.84 | 15.26 | 15.50 | 16.02 | 0.49 |
| 651.9988 | 52.98  | 13.73 | 14.98 | 13.53 | 14.45 | 0.24 |
| 652.1085 | 237.26 | 12.11 | 13.27 | 14.34 | 13.11 | 0.51 |
| 652.2145 | 284.21 | 16.67 | 15.57 | 15.32 | 16.23 | 0.38 |
| 652.2572 | 283.92 | 17.04 | 16.09 | 15.28 | 16.87 | 0.42 |
| 652.3004 | 284.55 | 17.00 | 15.65 | 15.36 | 16.39 | 0.44 |
| 652.3424 | 37.32  | 15.05 | 9.42  | 9.58  | 11.74 | 1.22 |
| 652.3437 | 283.49 | 16.77 | 15.56 | 15.58 | 16.42 | 0.33 |
| 652.3877 | 282.94 | 16.95 | 15.39 | 15.33 | 15.82 | 0.49 |
| 652.4318 | 282.3  | 17.13 | 15.61 | 15.09 | 15.87 | 0.56 |
| 652.4879 | 48.68  | 18.71 | 18.46 | 17.01 | 18.23 | 0.42 |
| 652.5248 | 43.02  | 12.13 | 10.95 | 10.55 | 12.08 | 0.46 |
| 652.5389 | 42.61  | 15.04 | 13.44 | 12.46 | 13.81 | 0.66 |
| 652.6089 | 44.06  | 12.92 | 10.99 | 11.77 | 12.62 | 0.61 |
| 652.6226 | 47.12  | 15.55 | 17.92 | 17.96 | 17.68 | 1.49 |
| 652.6615 | 44.65  | 11.32 | 14.41 | 15.17 | 14.41 | 1.01 |
| 652.7120 | 47.84  | 13.55 | 15.82 | 15.75 | 16.10 | 0.90 |
| 652.8075 | 64.26  | 10.02 | 12.08 | 11.15 | 10.82 | 0.51 |
| 652.8353 | 51.31  | 12.08 | 12.36 | 12.86 | 11.93 | 0.15 |
| 652.8915 | 49     | 16.04 | 8.99  | 9.71  | 10.70 | 1.43 |
| 653.1046 | 288.1  | 14.81 | 12.22 | 13.56 | 13.19 | 0.69 |
| 653.1135 | 299.21 | 12.52 | 16.28 | 17.05 | 14.54 | 0.97 |
| 653.1263 | 64.74  | 13.41 | 16.67 | 14.57 | 15.14 | 0.58 |
| 653.4796 | 53.39  | 14.27 | 12.32 | 14.99 | 12.54 | 0.29 |
| 653.5923 | 156.01 | 7.19  | 12.52 | 11.29 | 11.66 | 1.66 |
| 653.8284 | 50.74  | 14.32 | 17.86 | 17.91 | 16.74 | 1.53 |
| 654.0467 | 269.79 | 15.82 | 14.46 | 15.15 | 15.23 | 0.50 |
| 654.1042 | 266.8  | 12.21 | 13.98 | 15.41 | 13.57 | 0.74 |
| 654.1282 | 274.31 | 12.24 | 14.79 | 13.74 | 14.82 | 0.56 |
| 654.1836 | 144.53 | 9.16  | 15.14 | 12.00 | 12.73 | 1.01 |
| 654.2120 | 70.77  | 9.45  | 11.14 | 11.45 | 9.47  | 0.63 |
| 654.2456 | 74.25  | 11.96 | 13.78 | 12.69 | 12.55 | 0.76 |
| 654.3320 | 25.77  | 14.55 | 7.85  | 10.25 | 10.46 | 1.46 |
| 654.3368 | 276.5  | 14.98 | 15.06 | 15.41 | 15.57 | 0.11 |
| 654.4821 | 48.69  | 18.79 | 17.68 | 17.66 | 17.42 | 0.78 |
| 654.5709 | 45.37  | 15.06 | 16.47 | 16.29 | 16.06 | 0.67 |
| 654.6219 | 47.44  | 14.16 | 15.78 | 15.87 | 16.01 | 0.96 |
| 654.6950 | 48.61  | 12.15 | 12.29 | 11.07 | 11.74 | 0.16 |
| 654.7090 | 48.05  | 13.49 | 16.62 | 16.54 | 16.98 | 1.44 |
| 654.8299 | 51.15  | 13.41 | 12.48 | 12.75 | 12.87 | 0.48 |
| 655.1341 | 72.59  | 15.01 | 15.96 | 16.02 | 13.74 | 0.22 |
| 655.1506 | 139.11 | 6.21  | 10.71 | 8.44  | 8.76  | 1.04 |
| 655.2462 | 75.85  | 10.51 | 17.04 | 15.38 | 14.30 | 1.40 |
| 655.3454 | 276.39 | 16.23 | 15.22 | 15.32 | 15.59 | 0.53 |
| 655.4352 | 266.38 | 15.03 | 15.19 | 15.17 | 14.53 | 0.02 |
| 655.4700 | 36.39  | 16.86 | 13.29 | 14.03 | 14.93 | 1.16 |
| 655.7414 | 278.51 | 15.99 | 14.84 | 15.15 | 15.70 | 0.50 |
| 655.8252 | 50.7   | 14.01 | 18.18 | 18.22 | 17.27 | 1.61 |
| 655.9289 | 52.48  | 15.72 | 17.78 | 17.79 | 16.72 | 0.90 |
| 655.9480 | 278.83 | 15.02 | 15.18 | 15.31 | 15.17 | 0.13 |
| 656.0491 | 55.88  | 13.11 | 16.34 | 14.68 | 16.90 | 0.66 |

|          |        |       |       |       |       |      |
|----------|--------|-------|-------|-------|-------|------|
| 656.1507 | 273.33 | 15.47 | 14.96 | 15.12 | 15.17 | 0.30 |
| 656.2421 | 75.49  | 8.94  | 12.45 | 10.38 | 11.92 | 1.10 |
| 656.3402 | 278.61 | 16.38 | 14.84 | 15.01 | 15.61 | 0.75 |
| 656.3583 | 271.21 | 15.67 | 14.65 | 14.98 | 15.29 | 0.40 |
| 656.4339 | 52.89  | 13.67 | 11.98 | 11.94 | 12.40 | 0.66 |
| 656.4796 | 49.22  | 18.30 | 18.67 | 18.89 | 17.63 | 0.17 |
| 656.5245 | 22.54  | 16.30 | 7.88  | 9.38  | 11.35 | 1.66 |
| 656.5661 | 48.22  | 16.44 | 18.49 | 18.37 | 18.46 | 1.07 |
| 656.7023 | 49.03  | 13.97 | 15.72 | 15.47 | 16.24 | 0.89 |
| 656.9236 | 53.64  | 17.93 | 17.95 | 17.62 | 16.59 | 0.16 |
| 656.9849 | 52.94  | 10.14 | 11.87 | 13.81 | 11.78 | 0.68 |
| 657.0486 | 55.75  | 12.24 | 14.71 | 12.96 | 15.73 | 0.47 |
| 657.1539 | 79.08  | 9.97  | 12.56 | 11.07 | 10.51 | 0.50 |
| 657.3626 | 52.09  | 12.41 | 11.76 | 12.71 | 10.88 | 0.14 |
| 657.4190 | 27.21  | 13.56 | 16.22 | 13.58 | 15.14 | 0.84 |
| 657.4840 | 50.75  | 15.75 | 15.67 | 16.57 | 14.69 | 0.04 |
| 657.7473 | 278.95 | 15.81 | 14.63 | 14.93 | 15.15 | 0.60 |
| 657.8219 | 50.72  | 13.78 | 14.04 | 13.91 | 13.97 | 0.19 |
| 657.9054 | 53.15  | 14.29 | 11.72 | 11.37 | 12.29 | 1.35 |
| 657.9144 | 48.57  | 16.12 | 17.43 | 14.90 | 16.19 | 0.08 |
| 657.9261 | 39.16  | 12.83 | 13.61 | 12.22 | 13.37 | 0.11 |
| 657.9476 | 280.09 | 15.82 | 16.45 | 16.35 | 15.88 | 0.28 |
| 658.0468 | 54.97  | 11.03 | 10.43 | 9.37  | 11.99 | 0.21 |
| 658.1517 | 279.32 | 15.74 | 16.62 | 16.47 | 16.15 | 0.38 |
| 658.3530 | 279.28 | 16.09 | 16.30 | 16.25 | 16.22 | 0.10 |
| 658.4289 | 29.27  | 16.23 | 19.82 | 17.80 | 18.76 | 1.44 |
| 658.4356 | 265.53 | 13.12 | 15.01 | 15.09 | 13.57 | 0.46 |
| 658.4751 | 46.77  | 17.54 | 13.52 | 13.05 | 14.39 | 1.06 |
| 658.5186 | 266.95 | 14.37 | 14.66 | 15.24 | 14.82 | 0.24 |
| 658.5405 | 21.8   | 19.01 | 13.75 | 15.44 | 15.90 | 1.63 |
| 658.5475 | 279.67 | 14.60 | 15.49 | 15.37 | 15.60 | 0.34 |
| 658.5676 | 46.77  | 16.14 | 18.17 | 18.05 | 17.48 | 0.90 |
| 658.5934 | 266.51 | 15.25 | 14.72 | 14.76 | 14.87 | 0.23 |
| 658.6574 | 47.28  | 14.90 | 16.80 | 16.82 | 16.90 | 1.26 |
| 658.6945 | 49.29  | 12.79 | 12.26 | 12.33 | 12.06 | 0.26 |
| 658.7512 | 280.74 | 15.52 | 15.36 | 15.61 | 15.82 | 0.00 |
| 658.7935 | 287.32 | 15.33 | 14.18 | 15.03 | 14.49 | 0.29 |
| 658.8971 | 52.11  | 18.43 | 15.95 | 18.26 | 14.74 | 0.50 |
| 658.9293 | 28.05  | 14.40 | 19.47 | 17.11 | 18.30 | 1.72 |
| 659.0529 | 54.05  | 13.02 | 18.56 | 17.37 | 17.73 | 1.34 |
| 659.0985 | 83.91  | 9.60  | 13.71 | 13.70 | 12.15 | 1.43 |
| 659.1384 | 64.38  | 11.10 | 15.58 | 11.62 | 12.29 | 0.53 |
| 659.2593 | 37.58  | 15.74 | 16.74 | 16.38 | 17.64 | 0.80 |
| 659.4392 | 268.58 | 13.24 | 16.00 | 15.45 | 15.65 | 0.75 |
| 659.4874 | 52.99  | 16.11 | 18.81 | 18.51 | 17.11 | 1.16 |
| 659.5201 | 264.85 | 16.22 | 15.60 | 15.72 | 15.79 | 0.31 |
| 659.5503 | 39.93  | 18.20 | 15.91 | 15.40 | 16.36 | 0.98 |
| 659.5948 | 276.03 | 16.81 | 18.24 | 18.18 | 17.76 | 0.74 |
| 659.6698 | 276.65 | 16.78 | 18.72 | 18.88 | 18.30 | 0.82 |
| 659.7474 | 272.92 | 16.68 | 19.43 | 19.09 | 18.79 | 1.06 |
| 659.8242 | 276.72 | 17.00 | 18.73 | 19.27 | 18.50 | 0.82 |
| 659.9015 | 276.04 | 14.00 | 18.51 | 18.81 | 17.86 | 1.16 |
| 659.9382 | 27.42  | 13.43 | 16.38 | 13.45 | 15.66 | 0.82 |
| 659.9809 | 274.58 | 16.09 | 18.41 | 18.46 | 17.82 | 0.86 |
| 659.9886 | 53.11  | 11.16 | 16.58 | 15.25 | 13.82 | 1.20 |
| 660.0537 | 54.35  | 12.36 | 17.14 | 15.76 | 16.45 | 1.17 |

|          |        |       |       |       |       |      |
|----------|--------|-------|-------|-------|-------|------|
| 660.0556 | 267.02 | 14.68 | 17.33 | 17.17 | 17.23 | 0.83 |
| 660.1360 | 271.25 | 16.04 | 17.04 | 16.70 | 16.89 | 0.44 |
| 660.2069 | 268.2  | 15.30 | 14.67 | 15.10 | 14.82 | 0.23 |
| 660.2647 | 37.98  | 9.04  | 10.67 | 10.29 | 13.27 | 0.64 |
| 660.2887 | 266.02 | 14.35 | 15.69 | 15.38 | 14.88 | 0.46 |
| 660.3477 | 277.16 | 15.46 | 14.93 | 15.40 | 15.59 | 0.12 |
| 660.4384 | 33.15  | 15.91 | 18.80 | 16.34 | 18.06 | 1.01 |
| 660.4850 | 276.77 | 12.37 | 15.73 | 15.55 | 14.63 | 0.88 |
| 660.4859 | 52.94  | 14.53 | 17.58 | 16.79 | 15.69 | 0.91 |
| 660.5120 | 51.85  | 16.64 | 15.24 | 13.89 | 15.70 | 0.60 |
| 660.5633 | 44.22  | 18.40 | 17.45 | 17.11 | 17.82 | 0.61 |
| 660.6283 | 276.11 | 16.06 | 16.22 | 16.29 | 16.08 | 0.10 |
| 660.6545 | 47.24  | 14.92 | 17.88 | 17.92 | 17.92 | 1.54 |
| 660.6907 | 44.97  | 12.05 | 14.11 | 14.46 | 14.02 | 0.94 |
| 660.7707 | 276.22 | 15.71 | 15.87 | 16.03 | 15.38 | 0.08 |
| 660.8955 | 46.75  | 16.86 | 16.03 | 16.60 | 14.76 | 0.41 |
| 660.9155 | 276.36 | 15.46 | 16.62 | 16.44 | 16.06 | 0.53 |
| 661.0557 | 275.93 | 15.19 | 15.34 | 15.60 | 15.79 | 0.15 |
| 661.1503 | 279.26 | 15.46 | 14.89 | 15.21 | 15.45 | 0.21 |
| 661.2017 | 277.97 | 15.65 | 15.26 | 15.45 | 15.59 | 0.15 |
| 661.3500 | 279.5  | 16.18 | 17.14 | 17.20 | 16.88 | 0.61 |
| 661.4481 | 27.48  | 9.71  | 14.09 | 11.22 | 14.01 | 0.97 |
| 661.4803 | 277.6  | 15.42 | 15.30 | 15.05 | 15.57 | 0.08 |
| 661.5304 | 278.88 | 14.93 | 14.45 | 14.53 | 14.63 | 0.27 |
| 661.5553 | 277.52 | 13.58 | 14.82 | 15.19 | 14.80 | 0.48 |
| 661.5587 | 24.31  | 17.20 | 9.40  | 11.16 | 11.82 | 1.70 |
| 661.6148 | 276.26 | 15.09 | 15.60 | 15.83 | 15.53 | 0.30 |
| 661.6839 | 276.73 | 15.80 | 16.36 | 16.02 | 16.35 | 0.24 |
| 661.7451 | 279.11 | 15.51 | 16.71 | 16.48 | 16.77 | 0.66 |
| 661.8089 | 43.18  | 8.56  | 9.80  | 8.91  | 11.47 | 0.39 |
| 661.8124 | 277.05 | 15.09 | 15.44 | 15.33 | 15.88 | 0.17 |
| 661.8722 | 55.44  | 16.56 | 11.71 | 10.13 | 11.01 | 1.27 |
| 661.9495 | 279.24 | 15.37 | 14.99 | 15.07 | 15.68 | 0.13 |
| 662.2058 | 75.43  | 14.90 | 19.30 | 16.70 | 17.98 | 0.95 |
| 662.3333 | 119.79 | 7.49  | 14.57 | 13.84 | 13.78 | 1.82 |
| 662.3377 | 265.77 | 13.29 | 14.85 | 15.28 | 15.06 | 0.52 |
| 662.3503 | 272.39 | 15.75 | 14.87 | 15.00 | 15.30 | 0.43 |
| 662.3805 | 51.74  | 11.79 | 12.35 | 11.79 | 12.63 | 0.16 |
| 662.4273 | 47.14  | 15.44 | 12.14 | 11.49 | 12.59 | 1.06 |
| 662.5081 | 49.34  | 18.08 | 19.46 | 18.50 | 18.57 | 0.44 |
| 662.5698 | 30.24  | 18.70 | 12.45 | 14.22 | 13.59 | 1.48 |
| 662.6451 | 46.21  | 10.03 | 12.65 | 13.16 | 13.41 | 1.20 |
| 662.6564 | 62.94  | 14.69 | 17.73 | 17.24 | 17.63 | 1.50 |
| 662.6841 | 44.82  | 8.89  | 11.42 | 11.99 | 12.26 | 0.94 |
| 662.7391 | 62.39  | 13.60 | 12.11 | 11.73 | 13.69 | 0.39 |
| 662.7476 | 50.51  | 10.72 | 11.02 | 10.64 | 12.80 | 0.14 |
| 662.8634 | 52.53  | 14.56 | 12.99 | 13.16 | 12.70 | 0.84 |
| 662.9930 | 53.6   | 11.57 | 14.75 | 12.43 | 13.22 | 0.74 |
| 663.0000 | 121.59 | 11.44 | 13.44 | 12.93 | 13.20 | 1.12 |
| 663.2141 | 75.1   | 10.76 | 12.35 | 9.85  | 10.72 | 0.12 |
| 663.4535 | 22.32  | 19.58 | 17.90 | 18.93 | 18.42 | 0.92 |
| 663.4539 | 195.31 | 15.71 | 11.52 | 12.90 | 11.56 | 1.44 |
| 663.4842 | 53.6   | 7.48  | 12.32 | 10.63 | 11.27 | 0.98 |
| 663.4931 | 46.66  | 15.92 | 16.65 | 14.09 | 14.97 | 0.16 |
| 663.5750 | 22.52  | 17.08 | 8.62  | 11.10 | 11.17 | 1.58 |
| 663.6899 | 92.08  | 6.90  | 15.41 | 14.99 | 13.93 | 1.88 |

|          |        |       |       |       |       |      |
|----------|--------|-------|-------|-------|-------|------|
| 663.8569 | 51.59  | 14.56 | 14.98 | 15.21 | 14.70 | 0.24 |
| 663.9160 | 52.37  | 14.54 | 14.14 | 14.46 | 13.65 | 0.21 |
| 664.0171 | 93.84  | 8.12  | 13.06 | 12.88 | 11.99 | 1.61 |
| 664.0303 | 67.27  | 17.04 | 18.92 | 18.63 | 18.59 | 0.58 |
| 664.1177 | 282.94 | 15.87 | 18.62 | 18.43 | 17.63 | 1.24 |
| 664.1410 | 279.03 | 15.66 | 14.54 | 14.93 | 15.21 | 0.48 |
| 664.1713 | 294.61 | 16.02 | 16.12 | 16.59 | 16.39 | 0.19 |
| 664.3539 | 276.67 | 15.45 | 14.85 | 15.06 | 15.27 | 0.23 |
| 664.3568 | 86.97  | 9.19  | 14.70 | 14.08 | 13.87 | 1.54 |
| 664.4221 | 48.51  | 16.14 | 12.97 | 13.74 | 12.94 | 1.17 |
| 664.4601 | 29.61  | 18.63 | 17.19 | 18.40 | 17.86 | 0.70 |
| 664.5144 | 46.61  | 18.76 | 18.25 | 17.96 | 18.28 | 0.50 |
| 664.5407 | 277.91 | 13.88 | 14.38 | 14.86 | 14.96 | 0.27 |
| 664.6016 | 46.57  | 14.06 | 17.00 | 16.89 | 16.78 | 1.28 |
| 664.6506 | 48.38  | 10.97 | 11.24 | 11.12 | 12.64 | 0.19 |
| 664.7430 | 50.06  | 9.20  | 10.67 | 10.74 | 12.70 | 0.66 |
| 664.9018 | 33.58  | 11.30 | 13.87 | 12.82 | 13.55 | 0.66 |
| 664.9111 | 52.59  | 13.68 | 13.63 | 13.78 | 12.97 | 0.05 |
| 664.9582 | 45.53  | 12.82 | 11.64 | 11.85 | 10.73 | 0.40 |
| 665.0337 | 57.1   | 13.59 | 13.11 | 12.25 | 14.54 | 0.15 |
| 665.1217 | 267.17 | 13.57 | 13.92 | 14.27 | 13.85 | 0.17 |
| 665.1766 | 207.64 | 6.09  | 12.00 | 10.99 | 9.70  | 1.26 |
| 665.4614 | 27.88  | 16.50 | 13.01 | 15.07 | 14.13 | 1.04 |
| 665.4706 | 51.06  | 13.80 | 11.30 | 13.02 | 11.73 | 0.60 |
| 665.5130 | 22.33  | 16.14 | 9.49  | 10.38 | 12.70 | 1.50 |
| 665.8523 | 51.29  | 14.70 | 14.72 | 14.26 | 14.26 | 0.14 |
| 665.9143 | 51     | 13.04 | 12.89 | 13.42 | 13.56 | 0.07 |
| 666.0317 | 55.82  | 14.03 | 13.78 | 13.80 | 15.08 | 0.01 |
| 666.5107 | 45.5   | 17.79 | 17.60 | 17.03 | 17.50 | 0.26 |
| 666.5996 | 46.82  | 16.43 | 18.31 | 18.31 | 18.10 | 1.45 |
| 667.0392 | 54.8   | 12.79 | 17.52 | 16.85 | 17.64 | 1.17 |
| 667.1427 | 62.62  | 11.98 | 11.86 | 11.32 | 13.09 | 0.05 |
| 667.2318 | 242.25 | 13.64 | 12.47 | 12.87 | 12.76 | 0.40 |
| 667.4744 | 52.86  | 15.13 | 17.83 | 17.96 | 16.12 | 1.04 |
| 667.5354 | 40.01  | 17.15 | 12.61 | 12.49 | 14.92 | 0.98 |
| 667.9408 | 54.47  | 18.50 | 18.12 | 16.31 | 16.44 | 0.53 |
| 667.9773 | 52.79  | 10.63 | 11.45 | 13.14 | 10.77 | 0.44 |
| 668.0373 | 54.84  | 16.02 | 15.83 | 15.54 | 16.00 | 0.13 |
| 668.3504 | 278.88 | 16.47 | 14.63 | 15.20 | 15.62 | 0.76 |
| 668.4710 | 51.06  | 15.40 | 16.96 | 17.23 | 14.94 | 0.45 |
| 668.5011 | 45.28  | 13.88 | 12.13 | 11.37 | 12.17 | 0.75 |
| 668.5190 | 44.05  | 16.02 | 15.25 | 13.44 | 16.18 | 0.50 |
| 668.5972 | 46.86  | 16.05 | 18.06 | 18.02 | 17.97 | 1.45 |
| 668.6885 | 47.5   | 13.70 | 16.09 | 15.67 | 16.63 | 0.93 |
| 668.9341 | 52.49  | 17.60 | 19.64 | 19.36 | 18.75 | 1.08 |
| 669.5453 | 22.67  | 15.15 | 8.51  | 9.78  | 11.18 | 1.39 |
| 669.5950 | 48.74  | 11.58 | 11.62 | 12.41 | 12.25 | 0.20 |
| 669.8035 | 50.56  | 14.48 | 16.98 | 17.12 | 15.77 | 1.21 |
| 669.9276 | 52.5   | 13.07 | 11.78 | 12.12 | 13.02 | 0.39 |
| 669.9380 | 56.61  | 14.94 | 16.59 | 14.96 | 15.71 | 0.32 |
| 670.0446 | 53.3   | 18.89 | 21.81 | 21.59 | 20.85 | 1.36 |
| 670.3630 | 49.59  | 10.67 | 11.98 | 11.98 | 12.57 | 0.52 |
| 670.4271 | 28.15  | 13.62 | 19.32 | 17.46 | 18.57 | 1.84 |
| 670.4706 | 50.28  | 17.20 | 19.09 | 18.42 | 17.48 | 0.61 |
| 670.5431 | 46.93  | 16.63 | 18.41 | 17.79 | 17.98 | 0.70 |
| 670.5972 | 47.36  | 13.59 | 16.00 | 15.91 | 15.96 | 1.09 |

|          |        |       |       |       |       |      |
|----------|--------|-------|-------|-------|-------|------|
| 670.6848 | 47.59  | 14.07 | 17.00 | 16.76 | 17.38 | 1.25 |
| 670.7192 | 45.86  | 11.98 | 14.78 | 14.89 | 15.17 | 1.07 |
| 670.7798 | 276.68 | 15.69 | 15.88 | 15.77 | 15.69 | 0.09 |
| 670.8104 | 50.36  | 13.73 | 13.16 | 13.31 | 13.93 | 0.24 |
| 670.9234 | 276.72 | 12.43 | 16.37 | 16.10 | 15.78 | 1.07 |
| 670.9297 | 42.55  | 16.47 | 19.55 | 18.28 | 18.58 | 1.26 |
| 671.0457 | 53.18  | 16.25 | 19.09 | 18.81 | 17.86 | 1.25 |
| 671.0664 | 277.07 | 16.13 | 15.53 | 15.45 | 15.35 | 0.35 |
| 671.0973 | 70.79  | 10.83 | 11.96 | 13.86 | 9.76  | 0.39 |
| 671.1065 | 73.22  | 12.03 | 11.71 | 12.63 | 10.63 | 0.05 |
| 671.1229 | 145.78 | 7.73  | 15.48 | 14.35 | 12.97 | 1.77 |
| 671.2070 | 276.64 | 15.36 | 15.38 | 15.78 | 15.89 | 0.17 |
| 671.3703 | 52.02  | 11.36 | 12.55 | 13.00 | 12.44 | 0.53 |
| 671.4340 | 27.53  | 8.40  | 19.04 | 16.05 | 17.88 | 1.77 |
| 671.4773 | 52.24  | 15.58 | 17.66 | 16.93 | 16.49 | 0.93 |
| 671.7993 | 50.57  | 15.56 | 17.57 | 17.79 | 16.49 | 1.11 |
| 671.9006 | 52.28  | 13.58 | 10.75 | 12.39 | 10.91 | 0.73 |
| 671.9356 | 27.25  | 10.06 | 16.00 | 14.01 | 15.42 | 1.39 |
| 672.0395 | 53.06  | 16.40 | 19.26 | 19.07 | 18.52 | 1.30 |
| 672.1079 | 172.33 | 8.64  | 15.35 | 15.59 | 12.90 | 1.50 |
| 672.1297 | 142.95 | 6.82  | 11.06 | 10.54 | 8.98  | 1.27 |
| 672.4384 | 27.46  | 9.67  | 16.07 | 13.18 | 15.08 | 1.47 |
| 672.4525 | 39.03  | 16.38 | 18.89 | 17.21 | 18.17 | 1.11 |
| 672.5425 | 46.13  | 18.01 | 18.66 | 18.33 | 18.36 | 0.43 |
| 672.6332 | 278.79 | 15.42 | 14.92 | 15.21 | 15.38 | 0.17 |
| 672.6841 | 48.67  | 10.92 | 12.23 | 12.49 | 13.39 | 0.72 |
| 672.7156 | 45.73  | 11.27 | 12.73 | 12.08 | 14.14 | 0.46 |
| 672.7729 | 44.39  | 11.26 | 9.68  | 10.12 | 11.63 | 0.34 |
| 672.7795 | 279.21 | 13.80 | 15.19 | 15.26 | 14.87 | 0.50 |
| 672.8143 | 41.28  | 13.59 | 12.49 | 12.37 | 13.20 | 0.60 |
| 672.8963 | 54.24  | 17.72 | 15.09 | 15.47 | 13.87 | 0.71 |
| 672.9488 | 27.28  | 8.77  | 15.89 | 12.86 | 15.13 | 1.47 |
| 673.0439 | 53.82  | 12.68 | 13.34 | 13.16 | 13.40 | 0.28 |
| 673.0901 | 250.67 | 14.58 | 13.66 | 15.56 | 14.25 | 0.04 |
| 673.1106 | 180.45 | 6.65  | 11.80 | 11.66 | 9.42  | 1.51 |
| 673.1237 | 77.64  | 7.59  | 10.69 | 9.80  | 9.01  | 0.83 |
| 673.4492 | 34.5   | 14.40 | 14.97 | 13.05 | 14.03 | 0.11 |
| 673.4835 | 53.29  | 15.46 | 18.04 | 15.62 | 16.42 | 0.55 |
| 673.7976 | 50.51  | 13.84 | 13.51 | 13.57 | 13.14 | 0.24 |
| 673.8867 | 53.11  | 15.36 | 13.79 | 13.65 | 13.83 | 1.07 |
| 673.9854 | 53.38  | 11.43 | 14.06 | 11.00 | 13.30 | 0.38 |
| 674.0988 | 193.92 | 8.81  | 13.41 | 13.14 | 12.57 | 1.26 |
| 674.1051 | 212.58 | 7.12  | 11.74 | 12.02 | 11.88 | 1.35 |
| 674.1251 | 288.71 | 16.12 | 14.19 | 14.78 | 14.76 | 0.62 |
| 674.2890 | 294.73 | 14.76 | 14.04 | 14.71 | 13.05 | 0.22 |
| 674.4548 | 293.48 | 12.29 | 13.36 | 14.58 | 11.53 | 0.31 |
| 674.4575 | 44.95  | 14.58 | 12.32 | 12.50 | 11.85 | 0.69 |
| 674.4811 | 60.54  | 12.49 | 13.86 | 11.48 | 12.52 | 0.10 |
| 674.5416 | 46.29  | 17.45 | 18.58 | 18.33 | 17.96 | 0.49 |
| 674.6314 | 46.84  | 15.35 | 17.04 | 16.79 | 17.26 | 1.12 |
| 674.8713 | 52.65  | 17.10 | 11.33 | 12.86 | 11.44 | 1.23 |
| 675.0265 | 54.91  | 13.23 | 13.68 | 13.31 | 15.50 | 0.13 |
| 675.1128 | 64.61  | 11.92 | 14.76 | 12.57 | 13.01 | 0.53 |
| 675.4582 | 52.22  | 14.13 | 13.21 | 14.53 | 12.63 | 0.21 |
| 675.8810 | 53.77  | 15.66 | 13.16 | 13.12 | 13.08 | 1.06 |
| 676.0261 | 54.79  | 12.61 | 11.61 | 11.60 | 14.45 | 0.13 |

|          |        |       |       |       |       |      |
|----------|--------|-------|-------|-------|-------|------|
| 676.0813 | 266.04 | 13.32 | 14.13 | 14.51 | 14.75 | 0.35 |
| 676.3326 | 266.1  | 15.04 | 15.81 | 16.22 | 15.80 | 0.57 |
| 676.3571 | 279.86 | 15.13 | 14.91 | 15.23 | 15.54 | 0.00 |
| 676.4040 | 44.1   | 16.03 | 11.72 | 11.71 | 12.82 | 1.48 |
| 676.4577 | 52.34  | 14.06 | 11.54 | 13.00 | 10.61 | 0.64 |
| 676.4990 | 280.91 | 15.54 | 14.52 | 14.81 | 15.00 | 0.36 |
| 676.5395 | 46.48  | 17.11 | 17.60 | 17.23 | 17.66 | 0.30 |
| 676.5860 | 265.56 | 15.61 | 16.05 | 16.21 | 16.59 | 0.34 |
| 676.6291 | 46.94  | 15.95 | 18.05 | 18.06 | 18.21 | 1.62 |
| 676.6318 | 278.2  | 14.04 | 14.91 | 14.74 | 15.25 | 0.33 |
| 676.8713 | 41.31  | 15.92 | 17.14 | 16.33 | 16.26 | 0.43 |
| 676.9207 | 52.26  | 13.55 | 13.84 | 13.24 | 13.91 | 0.04 |
| 677.0436 | 278.52 | 15.70 | 14.01 | 15.00 | 15.27 | 0.46 |
| 677.1982 | 304.82 | 15.89 | 16.75 | 15.71 | 15.26 | 0.13 |
| 677.3533 | 273.47 | 16.10 | 15.95 | 16.05 | 16.20 | 0.04 |
| 677.4942 | 275.43 | 15.18 | 16.23 | 16.17 | 16.15 | 0.49 |
| 677.6407 | 273.26 | 16.08 | 15.37 | 15.66 | 15.79 | 0.31 |
| 677.6993 | 307.52 | 14.92 | 15.31 | 14.49 | 14.16 | 0.05 |
| 677.7762 | 274.96 | 14.80 | 14.61 | 15.04 | 15.05 | 0.02 |
| 677.9197 | 52.36  | 14.55 | 16.13 | 15.31 | 15.67 | 0.49 |
| 677.9223 | 274.79 | 15.79 | 15.47 | 15.53 | 15.65 | 0.13 |
| 678.0315 | 53.5   | 13.79 | 17.94 | 17.77 | 17.51 | 1.38 |
| 678.1821 | 75.85  | 12.12 | 13.25 | 11.81 | 12.47 | 0.17 |
| 678.2130 | 290.55 | 12.24 | 12.68 | 13.49 | 13.43 | 0.21 |
| 678.4696 | 53.65  | 15.54 | 17.53 | 17.64 | 16.04 | 0.69 |
| 678.5013 | 35.87  | 18.93 | 17.31 | 17.08 | 17.07 | 1.13 |
| 678.5330 | 51.8   | 13.03 | 15.16 | 14.42 | 14.65 | 0.66 |
| 678.6274 | 46.92  | 13.97 | 17.53 | 17.53 | 17.74 | 1.29 |
| 678.7161 | 47.52  | 13.22 | 14.05 | 13.75 | 15.78 | 0.32 |
| 678.7273 | 50.3   | 9.89  | 11.96 | 10.90 | 12.88 | 0.53 |
| 678.7786 | 278.27 | 15.69 | 16.80 | 16.98 | 16.52 | 0.63 |
| 678.8722 | 39.65  | 12.04 | 13.23 | 11.02 | 12.00 | 0.06 |
| 678.9130 | 53.38  | 11.87 | 11.35 | 10.00 | 14.19 | 0.15 |
| 678.9228 | 276.76 | 15.72 | 18.85 | 19.02 | 17.91 | 1.31 |
| 678.9631 | 54.09  | 17.58 | 19.09 | 18.05 | 16.64 | 0.25 |
| 679.0301 | 53.39  | 12.15 | 16.58 | 16.15 | 16.24 | 1.10 |
| 679.0658 | 279.12 | 16.10 | 19.94 | 19.92 | 19.12 | 1.42 |
| 679.2102 | 276.88 | 16.02 | 19.48 | 19.58 | 18.45 | 1.38 |
| 679.3536 | 276.89 | 16.16 | 18.76 | 18.68 | 17.84 | 1.06 |
| 679.4591 | 53.06  | 13.71 | 13.37 | 13.63 | 13.14 | 0.15 |
| 679.4679 | 50.15  | 15.41 | 16.50 | 16.42 | 16.31 | 0.60 |
| 679.4971 | 278.47 | 16.18 | 16.34 | 16.44 | 16.08 | 0.09 |
| 679.5098 | 25.62  | 16.53 | 11.29 | 10.49 | 11.82 | 1.49 |
| 679.5304 | 52.47  | 11.10 | 11.42 | 10.57 | 12.25 | 0.04 |
| 679.6430 | 276.14 | 15.95 | 15.60 | 15.78 | 15.61 | 0.18 |
| 679.7824 | 278.08 | 15.46 | 15.50 | 15.74 | 15.52 | 0.08 |
| 679.8324 | 50.67  | 13.27 | 12.34 | 12.37 | 11.89 | 0.34 |
| 679.9467 | 153.83 | 6.80  | 10.62 | 11.72 | 9.52  | 1.17 |
| 679.9655 | 53.73  | 15.20 | 15.83 | 14.04 | 14.23 | 0.10 |
| 679.9997 | 53     | 13.80 | 8.70  | 8.36  | 13.58 | 1.00 |
| 680.4859 | 32.76  | 19.63 | 18.20 | 18.85 | 18.80 | 0.96 |
| 680.5739 | 44.27  | 16.46 | 17.68 | 17.24 | 17.92 | 0.53 |
| 680.5840 | 280.62 | 15.76 | 14.72 | 14.55 | 14.98 | 0.31 |
| 680.6251 | 47.82  | 10.45 | 12.08 | 12.19 | 12.96 | 0.64 |
| 680.6327 | 282.57 | 14.21 | 15.11 | 14.98 | 15.57 | 0.28 |
| 680.7039 | 44.62  | 14.16 | 12.24 | 12.32 | 13.39 | 0.73 |



|          |        |       |       |       |       |      |
|----------|--------|-------|-------|-------|-------|------|
| 680.7144 | 47.51  | 11.62 | 14.63 | 14.77 | 16.48 | 0.95 |
| 680.8433 | 43.15  | 12.69 | 14.04 | 13.16 | 15.21 | 0.47 |
| 680.9273 | 38.51  | 12.92 | 17.72 | 16.81 | 15.61 | 1.46 |
| 680.9315 | 190.13 | 5.56  | 12.78 | 12.20 | 11.39 | 1.83 |
| 680.9613 | 54.83  | 13.54 | 11.99 | 9.29  | 10.50 | 0.72 |
| 681.0353 | 52.57  | 14.05 | 18.73 | 17.95 | 17.86 | 1.29 |
| 681.1762 | 282.95 | 16.33 | 14.91 | 14.69 | 15.57 | 0.40 |
| 681.2243 | 282.4  | 16.52 | 15.58 | 14.90 | 15.99 | 0.38 |
| 681.2679 | 283.13 | 16.78 | 14.90 | 14.52 | 15.61 | 0.61 |
| 681.3311 | 64.15  | 13.24 | 11.64 | 12.77 | 12.24 | 0.59 |
| 681.3610 | 281.22 | 16.58 | 15.43 | 15.77 | 16.33 | 0.34 |
| 681.4638 | 53.47  | 13.20 | 15.16 | 14.22 | 13.11 | 0.44 |
| 681.4786 | 34.89  | 18.79 | 18.75 | 18.65 | 18.60 | 0.10 |
| 681.4893 | 274.92 | 17.05 | 15.28 | 15.50 | 15.94 | 0.74 |
| 681.5305 | 50.54  | 11.82 | 13.44 | 12.70 | 12.97 | 0.45 |
| 681.5391 | 52.79  | 11.93 | 16.02 | 14.79 | 15.12 | 1.03 |
| 681.6115 | 254.04 | 15.33 | 13.07 | 14.26 | 14.02 | 0.93 |
| 681.7188 | 45.54  | 10.72 | 10.72 | 10.63 | 12.71 | 0.09 |
| 681.7683 | 282.6  | 16.06 | 15.05 | 14.63 | 15.42 | 0.33 |
| 681.8106 | 282.81 | 16.20 | 15.24 | 14.40 | 15.91 | 0.35 |
| 681.8304 | 56.94  | 13.52 | 13.41 | 14.47 | 13.12 | 0.14 |
| 681.8588 | 283.46 | 16.33 | 16.01 | 15.83 | 16.44 | 0.13 |
| 681.9046 | 284.7  | 17.02 | 15.47 | 15.23 | 16.32 | 0.51 |
| 681.9319 | 39.74  | 12.15 | 12.47 | 11.06 | 10.20 | 0.22 |
| 681.9504 | 283.95 | 17.23 | 15.48 | 15.76 | 16.25 | 0.57 |
| 681.9683 | 53.21  | 13.66 | 15.10 | 13.91 | 14.09 | 0.44 |
| 681.9952 | 283.69 | 17.30 | 15.25 | 15.25 | 16.12 | 0.66 |
| 682.0351 | 52.68  | 12.12 | 17.37 | 16.50 | 16.74 | 1.24 |
| 682.0397 | 282.67 | 17.08 | 15.89 | 15.75 | 16.86 | 0.45 |
| 682.0860 | 283.4  | 16.95 | 15.18 | 15.09 | 15.70 | 0.55 |
| 682.3561 | 279.83 | 16.64 | 14.99 | 15.04 | 15.69 | 0.77 |
| 682.4332 | 35.41  | 10.62 | 14.28 | 10.95 | 14.41 | 0.62 |
| 682.4685 | 53.32  | 13.95 | 14.76 | 13.92 | 13.86 | 0.19 |
| 682.4900 | 43.42  | 16.83 | 15.93 | 15.26 | 16.05 | 0.61 |
| 682.4938 | 274.96 | 14.80 | 15.07 | 15.20 | 15.67 | 0.13 |
| 682.5389 | 36.45  | 17.75 | 12.69 | 13.74 | 14.79 | 1.30 |
| 682.5749 | 46.31  | 17.33 | 18.90 | 18.66 | 18.66 | 0.88 |
| 682.6326 | 275.53 | 16.64 | 14.70 | 14.95 | 15.13 | 0.70 |
| 682.7102 | 49.62  | 9.50  | 11.78 | 11.98 | 12.93 | 1.16 |
| 682.8394 | 43.32  | 8.76  | 9.62  | 9.82  | 11.86 | 0.48 |
| 682.9246 | 37.67  | 11.17 | 14.60 | 12.67 | 14.85 | 1.10 |
| 683.0359 | 53.53  | 11.13 | 11.02 | 10.23 | 12.07 | 0.10 |
| 683.1345 | 64.13  | 17.57 | 18.58 | 19.22 | 17.76 | 0.64 |
| 683.3579 | 277.17 | 16.26 | 15.54 | 15.52 | 15.98 | 0.31 |
| 683.4313 | 27.26  | 12.04 | 14.23 | 11.67 | 14.20 | 0.56 |
| 683.4463 | 45.65  | 13.00 | 12.71 | 12.71 | 11.64 | 0.11 |
| 683.5011 | 43.75  | 15.99 | 13.58 | 14.02 | 13.17 | 0.74 |
| 683.5211 | 267.08 | 11.37 | 14.67 | 14.68 | 14.27 | 0.82 |
| 683.5438 | 22.32  | 16.23 | 8.07  | 9.75  | 11.29 | 1.63 |
| 683.6112 | 267.64 | 14.78 | 13.56 | 14.79 | 14.23 | 0.33 |
| 683.7091 | 267.49 | 15.73 | 14.43 | 15.11 | 15.29 | 0.54 |
| 683.7936 | 38.23  | 7.94  | 8.53  | 9.37  | 9.78  | 0.33 |
| 683.7938 | 267.62 | 15.93 | 14.69 | 15.37 | 15.35 | 0.51 |
| 683.8893 | 267.64 | 15.63 | 14.88 | 15.30 | 15.26 | 0.27 |
| 683.9159 | 54.44  | 17.86 | 17.26 | 16.59 | 15.77 | 0.41 |
| 683.9802 | 268.32 | 13.41 | 14.38 | 15.21 | 14.63 | 0.45 |

|          |        |       |       |       |       |      |
|----------|--------|-------|-------|-------|-------|------|
| 684.0133 | 53.65  | 15.48 | 10.01 | 10.06 | 12.11 | 1.21 |
| 684.1367 | 64.36  | 13.46 | 12.37 | 13.41 | 12.28 | 0.29 |
| 684.1951 | 75.52  | 12.22 | 16.63 | 12.70 | 15.28 | 0.68 |
| 684.3601 | 278.83 | 16.13 | 14.74 | 15.35 | 15.66 | 0.56 |
| 684.4451 | 33.91  | 13.93 | 17.87 | 15.21 | 17.57 | 0.93 |
| 684.4680 | 53.44  | 11.77 | 12.56 | 10.04 | 11.46 | 0.10 |
| 684.4859 | 50.7   | 15.21 | 16.65 | 13.62 | 14.94 | 0.01 |
| 684.4997 | 278.38 | 14.12 | 13.59 | 15.28 | 13.70 | 0.04 |
| 684.5695 | 43.49  | 18.71 | 18.61 | 18.46 | 18.63 | 0.15 |
| 684.6515 | 279.52 | 11.83 | 14.77 | 14.97 | 13.78 | 0.85 |
| 684.6617 | 47.18  | 12.44 | 16.54 | 16.02 | 16.66 | 1.22 |
| 684.7039 | 49.75  | 10.68 | 12.12 | 12.07 | 11.69 | 0.53 |
| 684.8056 | 283.86 | 14.84 | 15.21 | 14.95 | 14.63 | 0.08 |
| 684.9106 | 51.8   | 17.26 | 18.84 | 19.03 | 17.97 | 0.94 |
| 684.9444 | 27.45  | 9.17  | 15.46 | 11.10 | 14.67 | 1.13 |
| 685.1320 | 64.88  | 11.93 | 12.06 | 13.02 | 12.09 | 0.16 |
| 685.3526 | 39.16  | 11.44 | 10.98 | 9.16  | 10.97 | 0.25 |
| 685.3552 | 272.84 | 14.70 | 15.07 | 15.33 | 15.37 | 0.21 |
| 685.4474 | 28.27  | 10.71 | 14.20 | 12.39 | 14.14 | 0.80 |
| 685.7765 | 50.4   | 14.96 | 14.67 | 14.40 | 13.15 | 0.23 |
| 685.9128 | 53.03  | 15.13 | 16.54 | 16.32 | 15.31 | 0.53 |
| 686.0178 | 52.97  | 18.78 | 19.99 | 20.33 | 19.45 | 0.81 |
| 686.3546 | 39.65  | 10.50 | 9.49  | 8.38  | 10.03 | 0.31 |
| 686.3580 | 277.57 | 15.08 | 15.15 | 15.42 | 15.52 | 0.11 |
| 686.4393 | 46.23  | 15.41 | 14.97 | 14.76 | 14.37 | 0.20 |
| 686.4544 | 52.03  | 14.00 | 16.38 | 16.54 | 14.25 | 0.68 |
| 686.5268 | 48.65  | 13.32 | 13.46 | 13.26 | 14.26 | 0.08 |
| 686.5705 | 44.17  | 18.03 | 17.25 | 16.90 | 17.18 | 0.70 |
| 686.6590 | 47.18  | 14.24 | 17.38 | 17.24 | 17.63 | 1.55 |
| 686.9048 | 51.95  | 16.58 | 18.73 | 18.84 | 17.72 | 1.10 |
| 687.0188 | 53.66  | 15.48 | 16.79 | 17.22 | 16.82 | 0.71 |
| 687.4507 | 52.63  | 14.07 | 12.86 | 13.09 | 11.75 | 0.45 |
| 687.5748 | 23.42  | 15.96 | 9.05  | 10.68 | 11.03 | 1.39 |
| 687.7701 | 50.54  | 14.26 | 13.13 | 13.01 | 11.86 | 0.60 |
| 688.0146 | 53.18  | 15.93 | 17.73 | 18.12 | 17.34 | 0.86 |
| 688.1053 | 248.73 | 11.16 | 12.27 | 10.61 | 11.87 | 0.11 |
| 688.3570 | 276.97 | 16.29 | 14.93 | 15.39 | 15.81 | 0.58 |
| 688.4289 | 47.14  | 14.45 | 11.68 | 11.18 | 11.72 | 1.10 |
| 688.4993 | 276.54 | 12.29 | 14.08 | 13.70 | 14.27 | 0.42 |
| 688.5245 | 47.02  | 15.68 | 16.90 | 16.66 | 16.37 | 0.74 |
| 688.5837 | 40.9   | 15.72 | 8.66  | 7.16  | 9.75  | 1.46 |
| 688.6604 | 47.92  | 11.99 | 16.10 | 15.93 | 16.42 | 1.42 |
| 688.7500 | 50.25  | 8.41  | 11.91 | 10.92 | 13.23 | 0.97 |
| 688.8209 | 278.18 | 15.30 | 15.33 | 15.68 | 15.33 | 0.10 |
| 688.8973 | 277.07 | 15.01 | 15.67 | 15.84 | 15.70 | 0.44 |
| 688.9059 | 47.05  | 11.99 | 11.93 | 12.35 | 12.54 | 0.10 |
| 688.9698 | 278.19 | 15.88 | 15.46 | 15.47 | 15.33 | 0.25 |
| 689.0213 | 53.26  | 14.56 | 18.31 | 18.15 | 17.24 | 1.22 |
| 689.0499 | 273.02 | 14.95 | 16.41 | 16.26 | 15.73 | 0.47 |
| 689.1216 | 277.79 | 15.38 | 15.62 | 15.40 | 15.30 | 0.06 |
| 689.1980 | 278.83 | 15.00 | 14.82 | 14.67 | 14.43 | 0.20 |
| 689.2095 | 268.12 | 14.89 | 16.65 | 16.00 | 15.48 | 0.52 |
| 689.2806 | 276.2  | 15.46 | 15.23 | 15.78 | 15.54 | 0.02 |
| 689.3485 | 120.56 | 6.60  | 12.25 | 12.01 | 11.56 | 1.87 |
| 689.3581 | 113.75 | 7.32  | 12.68 | 12.27 | 12.36 | 1.67 |
| 689.3610 | 278.5  | 15.84 | 16.47 | 16.08 | 16.28 | 0.21 |

|          |        |       |       |       |       |      |
|----------|--------|-------|-------|-------|-------|------|
| 689.4586 | 52.77  | 14.81 | 17.39 | 17.33 | 15.56 | 0.87 |
| 689.5210 | 52.01  | 12.86 | 12.92 | 12.78 | 12.97 | 0.01 |
| 689.5995 | 118.62 | 8.11  | 12.21 | 12.08 | 11.46 | 1.47 |
| 689.7689 | 50.31  | 13.30 | 11.51 | 11.79 | 10.55 | 0.64 |
| 689.8588 | 62.5   | 14.22 | 11.97 | 12.52 | 12.12 | 0.93 |
| 689.9586 | 52.82  | 12.89 | 14.12 | 13.46 | 12.72 | 0.33 |
| 690.0206 | 53.43  | 13.43 | 17.23 | 17.04 | 16.16 | 1.29 |
| 690.2116 | 70.92  | 10.87 | 12.16 | 12.38 | 11.02 | 0.42 |
| 690.4550 | 52.82  | 13.94 | 13.98 | 13.80 | 13.24 | 0.07 |
| 690.5215 | 46.46  | 16.75 | 17.66 | 17.43 | 17.10 | 0.64 |
| 690.6043 | 46.07  | 15.73 | 17.85 | 17.44 | 17.82 | 1.41 |
| 690.6180 | 48.83  | 12.55 | 11.79 | 11.95 | 12.75 | 0.24 |
| 690.7470 | 50.49  | 10.51 | 11.43 | 10.82 | 12.80 | 0.31 |
| 691.0798 | 66.27  | 9.55  | 12.64 | 12.97 | 13.32 | 1.07 |
| 691.7423 | 49.71  | 11.05 | 11.64 | 12.08 | 12.47 | 0.41 |
| 692.0264 | 53.31  | 18.62 | 21.44 | 21.12 | 19.98 | 1.23 |
| 692.2166 | 278.67 | 15.74 | 14.92 | 15.23 | 15.30 | 0.32 |
| 692.3687 | 278.15 | 15.47 | 16.73 | 16.52 | 16.51 | 0.54 |
| 692.4607 | 53.58  | 13.68 | 15.12 | 14.01 | 13.72 | 0.33 |
| 692.5116 | 278.8  | 15.22 | 15.10 | 14.96 | 15.33 | 0.08 |
| 692.5219 | 48.31  | 16.05 | 17.78 | 16.81 | 16.83 | 0.60 |
| 692.6023 | 46.33  | 16.46 | 18.66 | 18.46 | 18.37 | 1.58 |
| 692.6515 | 279    | 15.45 | 14.15 | 14.70 | 14.66 | 0.61 |
| 692.7814 | 279.13 | 15.78 | 14.81 | 14.86 | 14.95 | 0.54 |
| 692.8913 | 52.32  | 11.85 | 12.04 | 12.30 | 10.95 | 0.05 |
| 692.9313 | 278.72 | 16.02 | 14.91 | 14.93 | 15.15 | 0.61 |
| 692.9623 | 53.35  | 12.61 | 12.38 | 11.16 | 11.99 | 0.35 |
| 693.0265 | 53.23  | 15.88 | 18.87 | 18.28 | 17.57 | 1.32 |
| 693.0744 | 279.28 | 15.26 | 14.76 | 14.78 | 15.23 | 0.17 |
| 693.2109 | 278.7  | 15.42 | 14.62 | 15.04 | 15.25 | 0.33 |
| 693.3565 | 279.25 | 16.31 | 14.55 | 14.78 | 15.41 | 0.85 |
| 693.4570 | 53.21  | 14.82 | 13.04 | 11.98 | 12.67 | 1.04 |
| 693.5012 | 277.56 | 15.79 | 15.57 | 15.32 | 15.68 | 0.17 |
| 693.8935 | 52.49  | 14.45 | 16.21 | 16.07 | 14.47 | 0.69 |
| 694.0172 | 53.33  | 17.46 | 18.84 | 18.46 | 18.28 | 0.80 |
| 694.3571 | 279.27 | 15.60 | 15.19 | 15.26 | 15.65 | 0.17 |
| 694.4714 | 45.54  | 14.62 | 13.19 | 12.41 | 12.79 | 0.67 |
| 694.4964 | 279.02 | 16.52 | 15.11 | 15.19 | 14.81 | 0.67 |
| 694.5112 | 48.68  | 14.22 | 12.55 | 12.51 | 13.68 | 0.67 |
| 694.5899 | 44.69  | 14.08 | 15.79 | 15.07 | 15.85 | 0.99 |
| 694.6048 | 47.27  | 15.01 | 17.62 | 17.58 | 17.31 | 1.40 |
| 694.6446 | 279.18 | 15.84 | 14.49 | 14.77 | 14.63 | 0.73 |
| 694.6922 | 47.34  | 11.51 | 14.84 | 14.82 | 15.75 | 1.12 |
| 694.7908 | 279.58 | 16.19 | 18.57 | 18.70 | 17.70 | 1.21 |
| 694.8268 | 278.53 | 15.36 | 14.83 | 15.03 | 15.30 | 0.22 |
| 694.8880 | 51.87  | 9.57  | 10.41 | 11.19 | 9.91  | 0.36 |
| 694.9224 | 276.98 | 13.18 | 14.80 | 15.20 | 15.30 | 0.78 |
| 694.9368 | 279.16 | 13.99 | 18.19 | 18.23 | 17.64 | 1.21 |
| 694.9371 | 54.26  | 17.27 | 17.86 | 17.20 | 15.52 | 0.00 |
| 694.9518 | 279.23 | 15.20 | 14.36 | 14.66 | 15.00 | 0.40 |
| 695.0674 | 277.03 | 14.32 | 14.94 | 15.07 | 15.28 | 0.33 |
| 695.0832 | 279.53 | 15.62 | 18.97 | 19.05 | 18.42 | 1.51 |
| 695.0993 | 132.72 | 7.49  | 13.37 | 13.09 | 13.16 | 1.89 |
| 695.1135 | 278.63 | 15.76 | 14.71 | 14.87 | 15.04 | 0.58 |
| 695.1340 | 147.29 | 9.30  | 18.86 | 16.17 | 14.45 | 1.43 |
| 695.2223 | 279.34 | 15.52 | 15.53 | 15.85 | 15.68 | 0.10 |

|          |        |       |       |       |       |      |
|----------|--------|-------|-------|-------|-------|------|
| 695.3503 | 129.36 | 8.80  | 13.77 | 13.39 | 14.03 | 1.66 |
| 695.3638 | 279.39 | 16.03 | 16.54 | 16.74 | 16.34 | 0.36 |
| 695.5071 | 279.13 | 14.67 | 17.76 | 17.36 | 16.98 | 0.95 |
| 695.5977 | 130.65 | 6.38  | 13.02 | 12.80 | 12.68 | 1.73 |
| 695.6408 | 278.6  | 15.27 | 14.89 | 15.11 | 15.33 | 0.14 |
| 695.8106 | 49.43  | 10.51 | 11.73 | 11.72 | 11.64 | 0.54 |
| 695.8479 | 121.42 | 6.84  | 12.26 | 11.53 | 12.03 | 1.43 |
| 695.9363 | 53.93  | 13.87 | 11.77 | 11.46 | 10.64 | 0.85 |
| 696.1171 | 249.35 | 12.34 | 14.06 | 15.80 | 14.03 | 0.67 |
| 696.1359 | 144.44 | 6.49  | 13.31 | 12.03 | 10.39 | 1.54 |
| 696.4674 | 46.72  | 15.60 | 15.59 | 15.05 | 15.41 | 0.11 |
| 696.5502 | 46.28  | 13.36 | 12.19 | 12.40 | 12.81 | 0.60 |
| 696.6070 | 48.1   | 13.15 | 14.58 | 14.54 | 15.02 | 0.79 |
| 696.6797 | 45.7   | 8.76  | 11.41 | 11.50 | 12.59 | 0.81 |
| 696.6908 | 47.91  | 11.57 | 15.55 | 15.61 | 16.32 | 1.38 |
| 696.9269 | 279.2  | 12.34 | 15.25 | 15.33 | 15.04 | 0.84 |
| 696.9327 | 54.85  | 13.60 | 11.77 | 11.50 | 10.75 | 0.65 |
| 697.0089 | 52.84  | 15.26 | 15.69 | 16.64 | 15.81 | 0.43 |
| 697.0708 | 279.25 | 15.32 | 15.35 | 15.46 | 15.44 | 0.05 |
| 697.1022 | 278.44 | 13.00 | 15.75 | 17.29 | 15.99 | 0.95 |
| 697.1156 | 179.78 | 7.02  | 11.07 | 11.53 | 11.41 | 1.10 |
| 697.2144 | 278.44 | 12.04 | 15.59 | 15.43 | 15.19 | 0.92 |
| 697.2191 | 37.95  | 10.23 | 11.76 | 12.02 | 13.15 | 0.81 |
| 697.3625 | 279.18 | 16.16 | 14.24 | 14.62 | 15.14 | 0.81 |
| 697.4416 | 52.63  | 14.85 | 13.39 | 13.95 | 12.86 | 0.83 |
| 697.4984 | 278.48 | 15.35 | 14.44 | 14.76 | 15.22 | 0.39 |
| 697.6493 | 277.95 | 15.61 | 14.61 | 14.76 | 15.36 | 0.48 |
| 697.6852 | 48.95  | 11.41 | 12.25 | 12.43 | 12.51 | 0.50 |
| 697.7889 | 276.96 | 15.35 | 15.17 | 15.42 | 15.42 | 0.03 |
| 697.8044 | 50.8   | 13.55 | 12.23 | 12.17 | 12.41 | 0.67 |
| 697.9576 | 127.64 | 7.23  | 12.82 | 12.81 | 12.40 | 1.71 |
| 698.0129 | 53.59  | 12.52 | 12.36 | 12.61 | 12.60 | 0.01 |
| 698.1049 | 199.36 | 8.02  | 18.04 | 17.98 | 15.78 | 1.82 |
| 698.1553 | 127.59 | 7.23  | 12.21 | 12.57 | 11.88 | 1.62 |
| 698.4449 | 52.46  | 14.28 | 13.59 | 14.09 | 13.05 | 0.28 |
| 698.4611 | 46.52  | 14.01 | 12.04 | 12.30 | 13.00 | 0.75 |
| 698.5528 | 46.9   | 16.58 | 17.47 | 17.32 | 17.19 | 0.99 |
| 698.6860 | 48.43  | 12.04 | 13.39 | 13.44 | 14.36 | 0.83 |
| 698.7750 | 50.26  | 9.10  | 9.67  | 9.46  | 11.70 | 0.25 |
| 698.9237 | 279.85 | 15.15 | 14.85 | 15.20 | 15.56 | 0.04 |
| 699.0635 | 278.83 | 15.77 | 14.27 | 14.80 | 15.16 | 0.66 |
| 699.1058 | 200.99 | 10.05 | 14.63 | 14.72 | 13.77 | 1.08 |
| 699.2135 | 279.37 | 15.84 | 16.52 | 16.61 | 16.36 | 0.47 |
| 699.3532 | 111.02 | 9.43  | 13.83 | 13.52 | 14.14 | 1.64 |
| 699.3568 | 276.39 | 16.41 | 17.79 | 17.62 | 17.33 | 0.83 |
| 699.3675 | 279.36 | 16.32 | 14.67 | 14.76 | 15.47 | 0.85 |
| 699.5022 | 279.09 | 15.74 | 19.18 | 19.18 | 18.11 | 1.51 |
| 699.6066 | 114.83 | 7.77  | 13.04 | 12.51 | 12.98 | 1.46 |
| 699.6484 | 279.03 | 15.66 | 18.20 | 18.35 | 17.74 | 1.31 |
| 699.7845 | 279.06 | 16.29 | 17.46 | 17.51 | 17.04 | 0.73 |
| 699.8939 | 54.56  | 15.50 | 12.10 | 13.03 | 11.59 | 0.88 |
| 699.9298 | 279.31 | 15.91 | 15.63 | 15.87 | 15.72 | 0.11 |
| 700.0141 | 53.11  | 13.60 | 18.26 | 18.20 | 16.73 | 1.30 |
| 700.0726 | 277.5  | 16.32 | 15.28 | 15.62 | 15.65 | 0.52 |
| 700.1687 | 75.83  | 12.32 | 16.39 | 12.20 | 15.06 | 0.61 |
| 700.2212 | 279.21 | 16.26 | 15.25 | 15.19 | 15.55 | 0.57 |

|          |        |       |       |       |       |      |
|----------|--------|-------|-------|-------|-------|------|
| 700.3610 | 278.94 | 15.85 | 15.20 | 15.31 | 15.55 | 0.33 |
| 700.4127 | 46.02  | 15.25 | 11.90 | 11.66 | 12.48 | 1.24 |
| 700.4495 | 53.08  | 14.50 | 13.81 | 13.84 | 12.84 | 0.38 |
| 700.4642 | 48.77  | 11.94 | 11.15 | 10.33 | 10.63 | 0.28 |
| 700.5174 | 49.65  | 13.34 | 14.97 | 14.28 | 13.64 | 0.39 |
| 700.5498 | 45.92  | 17.05 | 17.55 | 17.46 | 17.29 | 0.52 |
| 700.6337 | 46.2   | 12.58 | 17.58 | 17.02 | 17.47 | 1.48 |
| 700.6509 | 49.41  | 9.45  | 9.63  | 9.33  | 10.71 | 0.07 |
| 700.6735 | 49.43  | 13.14 | 12.87 | 12.61 | 12.38 | 0.20 |
| 700.7765 | 51.81  | 8.56  | 10.23 | 9.54  | 11.88 | 0.53 |
| 700.8827 | 51.36  | 17.12 | 18.20 | 18.78 | 17.12 | 0.65 |
| 700.9311 | 279.4  | 15.51 | 14.96 | 14.94 | 15.12 | 0.27 |
| 701.0121 | 53.28  | 12.58 | 14.94 | 14.65 | 14.26 | 0.85 |
| 701.0719 | 278.92 | 15.37 | 14.40 | 14.68 | 14.88 | 0.41 |
| 701.2176 | 279.32 | 15.90 | 15.86 | 15.91 | 15.84 | 0.01 |
| 701.3621 | 279.36 | 16.42 | 16.66 | 16.84 | 16.46 | 0.20 |
| 701.4469 | 53.27  | 13.48 | 13.72 | 13.45 | 12.18 | 0.03 |
| 701.4980 | 279.34 | 13.63 | 17.45 | 17.58 | 16.92 | 1.35 |
| 701.5180 | 52.74  | 8.31  | 10.73 | 10.09 | 9.73  | 0.50 |
| 701.5584 | 27.88  | 18.84 | 16.91 | 17.23 | 17.28 | 1.39 |
| 701.6401 | 279.25 | 14.85 | 15.99 | 16.23 | 15.83 | 0.70 |
| 701.7848 | 279.06 | 15.39 | 16.17 | 16.45 | 16.08 | 0.59 |
| 701.8846 | 52.19  | 14.37 | 13.33 | 13.46 | 12.32 | 0.53 |
| 701.9235 | 279.32 | 16.07 | 18.11 | 18.17 | 17.66 | 1.14 |
| 701.9922 | 54.06  | 16.18 | 12.59 | 13.48 | 13.73 | 0.73 |
| 702.0107 | 52.83  | 8.60  | 11.95 | 11.53 | 10.75 | 0.73 |
| 702.0718 | 279.24 | 15.38 | 15.24 | 15.56 | 15.43 | 0.00 |
| 702.2139 | 41.97  | 9.37  | 8.81  | 8.88  | 10.89 | 0.07 |
| 702.2166 | 279.13 | 14.20 | 16.21 | 16.04 | 15.87 | 0.74 |
| 702.3615 | 279.16 | 15.12 | 14.60 | 15.00 | 15.42 | 0.12 |
| 702.4096 | 46.04  | 16.14 | 14.39 | 13.51 | 14.82 | 0.73 |
| 702.4652 | 51.15  | 9.63  | 12.47 | 7.98  | 12.32 | 0.23 |
| 702.4981 | 280.93 | 14.03 | 15.25 | 15.52 | 15.22 | 0.45 |
| 702.5034 | 32.17  | 17.61 | 13.89 | 14.55 | 14.39 | 1.26 |
| 702.5414 | 42.5   | 16.08 | 12.31 | 12.60 | 13.47 | 1.71 |
| 702.5514 | 39.3   | 18.12 | 16.39 | 16.18 | 16.66 | 1.44 |
| 702.6327 | 46.52  | 13.98 | 18.08 | 17.87 | 18.18 | 1.67 |
| 702.7014 | 63.19  | 11.09 | 11.82 | 12.04 | 11.64 | 0.33 |
| 702.8678 | 54.21  | 14.79 | 13.17 | 13.65 | 12.89 | 0.47 |
| 702.8776 | 51.53  | 15.20 | 16.24 | 16.65 | 15.24 | 0.53 |
| 703.0175 | 53.49  | 14.02 | 18.42 | 17.42 | 17.13 | 1.37 |
| 703.0367 | 63.03  | 10.78 | 11.98 | 13.46 | 11.87 | 0.61 |
| 703.0758 | 279.46 | 15.95 | 15.83 | 15.50 | 15.83 | 0.14 |
| 703.2191 | 279.05 | 15.91 | 15.39 | 15.68 | 15.75 | 0.24 |
| 703.3631 | 279.4  | 16.78 | 19.09 | 19.07 | 18.42 | 1.15 |
| 703.5039 | 279.14 | 13.35 | 19.30 | 19.33 | 18.21 | 1.39 |
| 703.5130 | 50.5   | 15.91 | 16.09 | 13.92 | 14.91 | 0.28 |
| 703.5245 | 53.33  | 10.74 | 12.19 | 10.78 | 12.35 | 0.32 |
| 703.5742 | 27.71  | 20.04 | 18.11 | 18.05 | 18.73 | 1.23 |
| 703.6451 | 279.01 | 16.54 | 19.50 | 19.49 | 18.55 | 1.41 |
| 703.7499 | 49.9   | 14.53 | 10.96 | 10.01 | 9.83  | 1.19 |
| 703.7888 | 279.1  | 16.17 | 17.60 | 17.71 | 17.02 | 0.88 |
| 703.9331 | 279.41 | 16.28 | 18.81 | 18.86 | 17.85 | 1.35 |
| 704.0188 | 54.8   | 12.48 | 17.00 | 15.03 | 15.77 | 1.14 |
| 704.0745 | 279.31 | 15.62 | 16.48 | 16.61 | 16.36 | 0.59 |
| 704.1923 | 67.29  | 9.92  | 14.80 | 13.96 | 13.21 | 1.36 |

|          |        |       |       |       |       |      |
|----------|--------|-------|-------|-------|-------|------|
| 704.2228 | 279.24 | 15.98 | 14.83 | 15.29 | 15.50 | 0.46 |
| 704.3595 | 278.27 | 15.68 | 15.10 | 15.31 | 15.60 | 0.22 |
| 704.4074 | 46.31  | 15.67 | 13.20 | 11.82 | 13.28 | 0.88 |
| 704.4989 | 46.11  | 15.87 | 16.45 | 16.16 | 15.90 | 0.27 |
| 704.5219 | 26.96  | 21.52 | 21.26 | 21.02 | 20.80 | 0.46 |
| 704.5780 | 28.19  | 18.92 | 13.70 | 14.80 | 15.62 | 1.31 |
| 704.6225 | 45.22  | 9.66  | 12.20 | 11.78 | 12.68 | 0.84 |
| 704.6386 | 48.34  | 8.01  | 15.55 | 15.12 | 15.62 | 1.65 |
| 704.7204 | 48.09  | 8.99  | 11.22 | 11.60 | 12.49 | 1.01 |
| 704.8715 | 55.82  | 10.21 | 10.99 | 11.43 | 10.75 | 0.29 |
| 704.8850 | 266.25 | 15.98 | 14.12 | 15.39 | 14.79 | 0.68 |
| 704.9716 | 268.66 | 15.86 | 14.95 | 14.97 | 15.27 | 0.47 |
| 704.9951 | 53.82  | 12.76 | 10.72 | 11.48 | 11.87 | 0.41 |
| 705.0276 | 262.44 | 16.09 | 14.46 | 15.19 | 15.05 | 0.57 |
| 705.0556 | 264.83 | 16.36 | 16.62 | 16.57 | 16.92 | 0.15 |
| 705.1235 | 62.71  | 14.62 | 13.15 | 14.23 | 13.36 | 0.55 |
| 705.1378 | 265.74 | 16.69 | 16.76 | 16.73 | 17.29 | 0.07 |
| 705.2191 | 274.9  | 17.19 | 18.26 | 18.10 | 17.93 | 0.46 |
| 705.2306 | 261.66 | 13.08 | 15.34 | 15.44 | 14.97 | 0.62 |
| 705.3088 | 264.77 | 14.93 | 16.14 | 16.44 | 16.50 | 0.58 |
| 705.3611 | 276.85 | 16.94 | 17.45 | 17.91 | 17.28 | 0.37 |
| 705.3812 | 267.54 | 15.45 | 13.35 | 14.11 | 14.54 | 0.79 |
| 705.3898 | 263.94 | 16.60 | 16.09 | 16.25 | 16.62 | 0.22 |
| 705.4705 | 267.27 | 16.02 | 14.61 | 14.79 | 15.11 | 0.57 |
| 705.5060 | 277.52 | 15.70 | 16.05 | 15.80 | 15.78 | 0.11 |
| 705.5257 | 24.73  | 20.56 | 19.79 | 19.60 | 19.37 | 0.97 |
| 705.5359 | 267.79 | 16.70 | 14.82 | 15.15 | 14.84 | 0.74 |
| 705.5560 | 266.62 | 16.17 | 14.42 | 14.71 | 14.93 | 0.72 |
| 705.6353 | 275.79 | 15.21 | 14.03 | 14.48 | 14.81 | 0.48 |
| 705.6479 | 278.78 | 16.64 | 18.43 | 18.44 | 17.67 | 1.01 |
| 705.7022 | 261.76 | 16.22 | 14.13 | 14.66 | 15.08 | 0.75 |
| 705.7808 | 279.46 | 14.82 | 14.47 | 14.14 | 14.69 | 0.24 |
| 705.7913 | 277.43 | 16.31 | 19.09 | 18.81 | 18.39 | 1.26 |
| 705.8995 | 52.4   | 11.22 | 12.28 | 11.22 | 12.55 | 0.20 |
| 705.9390 | 273.11 | 16.51 | 20.41 | 20.08 | 19.24 | 1.60 |
| 706.0261 | 51.37  | 9.31  | 11.26 | 10.28 | 11.54 | 0.54 |
| 706.0303 | 184.14 | 6.84  | 12.15 | 11.74 | 12.17 | 1.51 |
| 706.0825 | 273.97 | 16.58 | 20.96 | 20.68 | 19.78 | 1.65 |
| 706.2256 | 273.61 | 16.52 | 20.88 | 20.61 | 19.69 | 1.57 |
| 706.3546 | 44     | 17.88 | 9.38  | 8.70  | 11.67 | 1.63 |
| 706.3687 | 273.3  | 16.91 | 20.42 | 20.18 | 19.33 | 1.47 |
| 706.4967 | 46.68  | 14.81 | 16.93 | 16.60 | 16.15 | 0.70 |
| 706.5083 | 275.38 | 14.25 | 19.49 | 19.19 | 17.87 | 1.37 |
| 706.5378 | 26.49  | 22.77 | 21.41 | 21.28 | 21.69 | 1.63 |
| 706.5836 | 46.08  | 12.89 | 14.37 | 13.84 | 14.11 | 0.37 |
| 706.6373 | 49.39  | 7.92  | 10.04 | 8.96  | 11.11 | 0.65 |
| 706.6580 | 274.29 | 16.55 | 17.98 | 17.77 | 17.36 | 0.77 |
| 706.7214 | 48.74  | 9.52  | 11.51 | 11.28 | 13.47 | 0.67 |
| 706.7976 | 273.04 | 16.44 | 16.78 | 16.13 | 16.42 | 0.02 |
| 706.8971 | 51.21  | 12.92 | 12.74 | 11.82 | 12.51 | 0.20 |
| 706.9437 | 273.06 | 16.72 | 15.44 | 15.70 | 15.52 | 0.62 |
| 707.0804 | 279.02 | 16.06 | 14.84 | 14.83 | 15.36 | 0.61 |
| 707.0959 | 256.02 | 14.58 | 12.72 | 13.25 | 13.70 | 0.46 |
| 707.2212 | 279.35 | 15.65 | 18.16 | 18.21 | 17.34 | 1.21 |
| 707.3564 | 279.27 | 15.88 | 15.88 | 16.16 | 15.83 | 0.07 |
| 707.5083 | 278.86 | 15.73 | 18.50 | 18.60 | 17.98 | 1.23 |

|          |        |       |       |       |       |      |
|----------|--------|-------|-------|-------|-------|------|
| 707.5407 | 24.91  | 21.50 | 20.03 | 19.87 | 20.19 | 1.64 |
| 707.6481 | 279.3  | 16.61 | 19.35 | 19.30 | 18.72 | 1.39 |
| 707.7161 | 49.03  | 9.93  | 11.46 | 12.06 | 12.16 | 0.65 |
| 707.7901 | 277.57 | 16.29 | 18.90 | 18.72 | 18.00 | 1.33 |
| 707.9322 | 279.32 | 15.70 | 19.14 | 19.13 | 18.15 | 1.46 |
| 707.9994 | 52.6   | 18.62 | 20.12 | 20.39 | 19.24 | 1.16 |
| 708.0720 | 279.08 | 13.58 | 18.07 | 18.11 | 17.43 | 1.55 |
| 708.1093 | 274.32 | 15.92 | 16.29 | 16.64 | 16.59 | 0.35 |
| 708.2218 | 279.21 | 16.04 | 16.17 | 16.12 | 16.31 | 0.09 |
| 708.2572 | 233.11 | 15.93 | 14.10 | 14.40 | 14.25 | 1.09 |
| 708.3508 | 44.84  | 18.76 | 12.52 | 11.18 | 12.92 | 1.47 |
| 708.3589 | 274.95 | 16.29 | 19.59 | 19.84 | 19.21 | 1.43 |
| 708.4339 | 52.52  | 12.60 | 14.39 | 14.49 | 12.50 | 0.48 |
| 708.4838 | 42.59  | 12.59 | 11.40 | 11.17 | 12.43 | 0.49 |
| 708.4971 | 45.42  | 14.90 | 16.44 | 16.28 | 15.84 | 0.53 |
| 708.5821 | 47.21  | 16.12 | 17.51 | 17.37 | 17.67 | 0.90 |
| 708.6066 | 276.18 | 14.13 | 19.18 | 19.44 | 18.55 | 1.43 |
| 708.6572 | 276.98 | 16.09 | 15.17 | 14.44 | 15.61 | 0.53 |
| 708.7231 | 273.14 | 14.24 | 14.66 | 15.21 | 14.87 | 0.29 |
| 708.8058 | 277.33 | 15.32 | 15.41 | 15.43 | 15.89 | 0.08 |
| 708.8663 | 276.34 | 15.87 | 17.94 | 18.14 | 18.26 | 1.04 |
| 708.9471 | 277.98 | 16.29 | 15.25 | 15.57 | 15.75 | 0.47 |
| 709.0010 | 52.91  | 14.94 | 17.30 | 17.81 | 15.85 | 0.86 |
| 709.0093 | 275.42 | 14.23 | 14.56 | 15.01 | 15.30 | 0.19 |
| 709.1117 | 273.04 | 15.27 | 14.47 | 15.46 | 15.20 | 0.17 |
| 709.3702 | 279.85 | 15.57 | 14.77 | 15.03 | 15.27 | 0.32 |
| 709.5059 | 279.27 | 15.21 | 18.90 | 18.87 | 18.32 | 1.41 |
| 709.6481 | 279.74 | 16.82 | 24.36 | 24.28 | 23.10 | 1.72 |
| 709.7914 | 279.86 | 17.42 | 25.70 | 25.64 | 24.31 | 1.76 |
| 709.9343 | 281.67 | 17.84 | 26.00 | 25.91 | 24.65 | 1.75 |
| 709.9973 | 52.79  | 15.97 | 17.42 | 15.93 | 16.53 | 0.31 |
| 710.0770 | 280.21 | 17.75 | 26.07 | 26.04 | 24.70 | 1.76 |
| 710.2207 | 279.75 | 17.46 | 25.64 | 25.58 | 24.31 | 1.73 |
| 710.3498 | 44.08  | 19.11 | 13.00 | 13.52 | 14.58 | 1.82 |
| 710.3637 | 280.13 | 17.88 | 24.92 | 24.89 | 23.61 | 1.72 |
| 710.4489 | 55.74  | 15.80 | 16.36 | 14.47 | 15.18 | 0.13 |
| 710.4980 | 45.78  | 13.04 | 12.54 | 12.15 | 12.79 | 0.22 |
| 710.5065 | 280.3  | 16.56 | 23.94 | 23.90 | 22.73 | 1.69 |
| 710.5775 | 49.11  | 15.97 | 18.66 | 18.13 | 18.66 | 1.26 |
| 710.6503 | 285.26 | 16.65 | 20.98 | 21.78 | 20.27 | 1.40 |
| 710.6517 | 43.62  | 11.51 | 15.64 | 14.83 | 16.70 | 1.20 |
| 710.7934 | 279.12 | 16.92 | 21.64 | 21.65 | 20.29 | 1.66 |
| 710.8775 | 274.51 | 15.49 | 14.02 | 13.83 | 15.01 | 0.48 |
| 710.9145 | 53.66  | 16.10 | 14.55 | 15.14 | 13.79 | 0.61 |
| 710.9372 | 279.52 | 16.42 | 20.03 | 19.98 | 19.35 | 1.43 |
| 711.0029 | 52.66  | 14.98 | 18.52 | 18.36 | 17.30 | 1.28 |
| 711.0772 | 277.73 | 16.67 | 18.21 | 18.19 | 17.59 | 0.70 |
| 711.1276 | 269    | 13.22 | 16.07 | 15.91 | 15.36 | 0.79 |
| 711.1390 | 262.15 | 15.24 | 12.76 | 12.65 | 14.07 | 0.68 |
| 711.2248 | 277.23 | 15.90 | 15.20 | 15.50 | 15.78 | 0.29 |
| 711.4463 | 52.33  | 12.05 | 12.48 | 10.97 | 12.06 | 0.08 |
| 711.5024 | 53.01  | 13.36 | 13.21 | 12.79 | 12.78 | 0.19 |
| 711.5032 | 274.33 | 15.41 | 15.28 | 15.54 | 15.33 | 0.01 |
| 711.5690 | 52.95  | 14.65 | 15.53 | 13.20 | 16.60 | 0.05 |
| 711.7851 | 47.92  | 12.00 | 13.88 | 13.50 | 14.25 | 0.99 |
| 711.9330 | 280.08 | 16.00 | 15.64 | 15.95 | 15.73 | 0.15 |

|          |        |       |       |       |       |      |
|----------|--------|-------|-------|-------|-------|------|
| 712.0021 | 52.65  | 13.11 | 17.30 | 17.05 | 15.97 | 1.13 |
| 712.0756 | 280.09 | 13.61 | 18.33 | 17.55 | 17.33 | 1.20 |
| 712.1123 | 261.99 | 13.82 | 18.10 | 18.20 | 17.12 | 1.20 |
| 712.1344 | 266.64 | 15.20 | 13.38 | 14.21 | 14.71 | 0.50 |
| 712.2190 | 281.12 | 16.56 | 19.30 | 19.08 | 18.67 | 1.11 |
| 712.3462 | 44     | 18.23 | 10.36 | 9.45  | 11.98 | 1.59 |
| 712.3619 | 281.29 | 16.84 | 19.28 | 19.11 | 18.55 | 1.10 |
| 712.4420 | 50.35  | 16.02 | 15.00 | 14.68 | 15.18 | 0.54 |
| 712.5057 | 280.42 | 14.72 | 17.75 | 17.04 | 16.86 | 0.96 |
| 712.5238 | 45.23  | 12.67 | 11.89 | 12.18 | 12.89 | 0.23 |
| 712.5770 | 47.2   | 14.17 | 13.85 | 13.62 | 13.84 | 0.21 |
| 712.6495 | 280.32 | 15.98 | 16.05 | 16.10 | 16.05 | 0.05 |
| 712.6697 | 48.07  | 11.11 | 15.27 | 14.96 | 16.30 | 1.16 |
| 712.7938 | 281.95 | 16.34 | 15.88 | 15.79 | 15.98 | 0.28 |
| 712.9462 | 282.07 | 15.75 | 14.68 | 14.18 | 15.85 | 0.35 |
| 712.9925 | 280.41 | 15.68 | 15.14 | 13.19 | 15.31 | 0.34 |
| 713.0470 | 279.66 | 16.51 | 15.03 | 14.70 | 15.53 | 0.61 |
| 713.0624 | 52.4   | 9.65  | 11.53 | 11.16 | 11.53 | 0.65 |
| 713.1171 | 250.66 | 11.56 | 14.86 | 14.30 | 13.77 | 0.89 |
| 713.1389 | 275.08 | 16.75 | 15.04 | 15.49 | 15.92 | 0.61 |
| 713.2068 | 270.96 | 15.15 | 14.38 | 14.67 | 15.30 | 0.32 |
| 713.2286 | 274.41 | 16.34 | 14.92 | 15.25 | 15.57 | 0.58 |
| 713.3612 | 276.07 | 16.15 | 14.29 | 14.47 | 14.85 | 0.95 |
| 713.3751 | 270.32 | 16.32 | 15.18 | 15.20 | 15.76 | 0.48 |
| 713.4521 | 53.15  | 14.05 | 13.32 | 11.71 | 13.51 | 0.74 |
| 713.4756 | 275.13 | 16.57 | 14.38 | 15.02 | 15.27 | 0.69 |
| 713.5045 | 273.9  | 15.61 | 14.78 | 14.92 | 14.81 | 0.43 |
| 713.5656 | 279.5  | 16.84 | 15.09 | 15.02 | 15.92 | 0.65 |
| 713.6138 | 281.79 | 16.69 | 15.31 | 14.79 | 15.84 | 0.54 |
| 713.6465 | 272.96 | 15.76 | 14.52 | 15.31 | 14.94 | 0.52 |
| 713.6618 | 282.16 | 16.55 | 15.12 | 15.08 | 16.00 | 0.47 |
| 713.6620 | 41.37  | 10.95 | 11.34 | 11.18 | 12.06 | 0.13 |
| 713.7094 | 279.82 | 16.96 | 15.12 | 14.95 | 15.86 | 0.69 |
| 713.7764 | 46.75  | 10.09 | 12.58 | 12.34 | 12.83 | 1.03 |
| 713.7847 | 49.25  | 11.46 | 14.42 | 14.08 | 13.94 | 1.48 |
| 713.7897 | 275.16 | 15.81 | 15.33 | 15.57 | 15.43 | 0.24 |
| 713.8866 | 54.06  | 16.40 | 14.85 | 13.44 | 14.39 | 0.95 |
| 713.9372 | 275.76 | 15.76 | 14.68 | 14.95 | 14.73 | 0.52 |
| 714.0077 | 53.18  | 18.61 | 21.01 | 20.53 | 19.53 | 1.14 |
| 714.1904 | 280.23 | 16.47 | 15.07 | 15.72 | 16.22 | 0.37 |
| 714.2315 | 279.89 | 17.06 | 15.14 | 15.89 | 15.90 | 0.57 |
| 714.2811 | 283.51 | 17.02 | 15.66 | 15.19 | 16.54 | 0.51 |
| 714.3037 | 265.79 | 12.74 | 13.94 | 14.11 | 13.30 | 0.43 |
| 714.3242 | 277.75 | 16.93 | 14.66 | 15.00 | 15.37 | 0.65 |
| 714.3402 | 42.56  | 17.47 | 8.68  | 8.62  | 10.44 | 1.67 |
| 714.3848 | 275.27 | 15.78 | 17.87 | 16.97 | 17.42 | 0.49 |
| 714.3992 | 264.38 | 12.03 | 14.89 | 15.68 | 13.95 | 1.07 |
| 714.4248 | 282.19 | 16.95 | 15.77 | 14.58 | 16.41 | 0.53 |
| 714.4420 | 49.83  | 15.66 | 16.19 | 14.04 | 16.17 | 0.09 |
| 714.4734 | 278.15 | 16.97 | 17.89 | 18.33 | 17.97 | 0.45 |
| 714.5069 | 47.64  | 15.09 | 12.94 | 11.96 | 12.90 | 1.03 |
| 714.5203 | 278.57 | 15.48 | 15.42 | 15.40 | 15.49 | 0.02 |
| 714.5241 | 46.35  | 16.37 | 17.70 | 17.22 | 17.82 | 0.77 |
| 714.5351 | 47.4   | 13.91 | 12.08 | 12.00 | 13.04 | 0.97 |
| 714.5596 | 277.64 | 17.21 | 18.48 | 18.89 | 18.38 | 0.60 |
| 714.5659 | 38.44  | 11.19 | 13.24 | 12.86 | 14.20 | 0.70 |



|          |        |       |       |       |       |      |
|----------|--------|-------|-------|-------|-------|------|
| 714.6450 | 277.25 | 17.21 | 18.61 | 19.05 | 18.55 | 0.68 |
| 714.6584 | 46.61  | 12.60 | 14.26 | 13.72 | 14.80 | 0.56 |
| 714.6708 | 49.37  | 10.06 | 10.61 | 10.54 | 11.99 | 0.29 |
| 714.7262 | 277.16 | 17.02 | 18.71 | 19.05 | 18.28 | 0.76 |
| 714.8075 | 276.79 | 16.84 | 18.38 | 18.86 | 18.26 | 0.73 |
| 714.8869 | 51.73  | 15.22 | 15.33 | 14.65 | 15.04 | 0.09 |
| 714.8906 | 275.24 | 17.03 | 17.87 | 18.44 | 17.82 | 0.48 |
| 714.9735 | 267.27 | 14.47 | 17.03 | 16.64 | 17.16 | 0.80 |
| 715.0077 | 274.29 | 14.28 | 14.79 | 14.46 | 15.26 | 0.13 |
| 715.0085 | 52.76  | 15.30 | 18.28 | 17.50 | 16.95 | 0.94 |
| 715.0689 | 278.48 | 16.07 | 18.71 | 18.66 | 18.22 | 1.37 |
| 715.1430 | 266.03 | 17.07 | 16.02 | 16.17 | 16.35 | 0.48 |
| 715.2122 | 278.8  | 15.17 | 20.05 | 20.06 | 19.22 | 1.78 |
| 715.2302 | 266.99 | 15.67 | 13.97 | 14.28 | 14.37 | 0.61 |
| 715.3560 | 277.69 | 15.94 | 20.28 | 20.53 | 19.39 | 1.76 |
| 715.4985 | 277.47 | 16.11 | 20.35 | 20.52 | 19.51 | 1.70 |
| 715.6420 | 277.21 | 15.68 | 19.89 | 19.97 | 18.98 | 1.64 |
| 715.7824 | 50.32  | 10.20 | 13.27 | 13.24 | 13.35 | 1.08 |
| 715.7844 | 277.3  | 16.46 | 18.71 | 18.71 | 18.26 | 1.17 |
| 715.9319 | 278.86 | 16.10 | 17.37 | 17.65 | 17.19 | 0.94 |
| 716.0010 | 53.12  | 16.42 | 18.31 | 17.84 | 17.10 | 0.85 |
| 716.0668 | 278.78 | 15.66 | 15.08 | 15.16 | 15.63 | 0.28 |
| 716.1410 | 76.23  | 8.94  | 11.74 | 8.93  | 11.24 | 0.46 |
| 716.3832 | 44.89  | 17.52 | 12.48 | 11.78 | 13.43 | 1.36 |
| 716.5103 | 44.64  | 10.06 | 10.54 | 10.43 | 11.39 | 0.20 |
| 716.5589 | 27.71  | 19.13 | 16.98 | 17.28 | 17.80 | 1.43 |
| 716.6168 | 47.46  | 11.66 | 14.56 | 13.79 | 15.25 | 0.91 |
| 716.8566 | 51.51  | 15.63 | 14.18 | 14.75 | 12.80 | 0.50 |
| 717.1155 | 146.98 | 7.94  | 11.17 | 10.02 | 9.62  | 0.72 |
| 717.5252 | 25.52  | 17.79 | 12.39 | 13.33 | 14.63 | 1.42 |
| 717.5619 | 25.46  | 17.72 | 12.17 | 13.13 | 14.49 | 1.56 |
| 717.6093 | 260.95 | 14.16 | 13.44 | 13.99 | 14.18 | 0.17 |
| 717.6209 | 221.02 | 6.73  | 12.06 | 12.82 | 11.98 | 1.81 |
| 717.8589 | 52.93  | 13.32 | 10.35 | 11.63 | 10.13 | 0.75 |
| 717.8623 | 262.91 | 16.24 | 14.58 | 15.76 | 15.18 | 0.58 |
| 718.1177 | 249.86 | 15.51 | 13.38 | 15.13 | 14.49 | 0.66 |
| 718.3736 | 238.9  | 12.58 | 11.48 | 13.10 | 12.91 | 0.08 |
| 718.3815 | 45.72  | 17.79 | 13.62 | 13.53 | 14.11 | 1.45 |
| 718.4368 | 52.25  | 12.20 | 12.62 | 12.19 | 12.09 | 0.08 |
| 718.4654 | 78.29  | 8.51  | 12.17 | 9.91  | 10.50 | 0.72 |
| 718.5172 | 46.02  | 9.35  | 13.01 | 12.90 | 12.98 | 0.98 |
| 718.5692 | 35.58  | 20.49 | 18.47 | 18.29 | 19.30 | 1.46 |
| 718.6132 | 47.39  | 11.76 | 16.98 | 16.39 | 16.71 | 1.32 |
| 718.8479 | 51.64  | 14.55 | 11.73 | 11.86 | 11.38 | 1.11 |
| 718.8840 | 38.84  | 9.85  | 12.88 | 10.79 | 11.33 | 0.59 |
| 718.9906 | 52.9   | 13.61 | 17.07 | 17.40 | 14.84 | 1.06 |
| 719.0833 | 199.55 | 7.27  | 12.49 | 12.83 | 11.60 | 1.46 |
| 719.0910 | 197.48 | 6.45  | 10.71 | 11.41 | 9.70  | 1.33 |
| 719.2422 | 285.38 | 15.59 | 14.77 | 14.77 | 15.16 | 0.34 |
| 719.3663 | 283.38 | 16.34 | 15.20 | 15.45 | 15.64 | 0.54 |
| 719.4328 | 52.17  | 13.38 | 12.44 | 12.80 | 12.60 | 0.40 |
| 719.4892 | 285.1  | 11.98 | 14.96 | 14.19 | 13.27 | 0.58 |
| 719.4906 | 52.64  | 10.88 | 12.15 | 13.07 | 11.55 | 0.49 |
| 719.5461 | 35.48  | 19.07 | 16.32 | 17.13 | 18.15 | 1.18 |
| 719.5774 | 25.55  | 18.90 | 14.02 | 14.93 | 15.92 | 1.45 |
| 719.9899 | 52.95  | 12.86 | 13.71 | 13.98 | 13.11 | 0.39 |

|          |        |       |       |       |       |      |
|----------|--------|-------|-------|-------|-------|------|
| 720.3770 | 274.75 | 14.44 | 15.11 | 15.45 | 15.65 | 0.32 |
| 720.3795 | 44.94  | 18.08 | 13.46 | 11.85 | 14.23 | 1.35 |
| 720.4760 | 48.77  | 14.82 | 15.46 | 15.25 | 14.94 | 0.18 |
| 720.5226 | 46.57  | 10.45 | 11.84 | 9.88  | 10.76 | 0.13 |
| 720.5538 | 31.56  | 19.07 | 15.45 | 15.48 | 17.12 | 1.57 |
| 720.5967 | 38.7   | 14.11 | 11.78 | 11.69 | 12.27 | 0.75 |
| 720.6120 | 47.69  | 12.47 | 16.22 | 15.97 | 16.47 | 1.35 |
| 720.7006 | 49.38  | 10.21 | 10.55 | 10.71 | 11.64 | 0.21 |
| 721.0593 | 65.17  | 9.68  | 11.70 | 11.08 | 11.42 | 0.44 |
| 721.0900 | 65.47  | 13.66 | 11.01 | 13.72 | 10.95 | 0.48 |
| 721.2165 | 285.63 | 14.93 | 15.05 | 15.26 | 15.27 | 0.13 |
| 721.2671 | 263.47 | 15.96 | 14.21 | 15.33 | 14.52 | 0.69 |
| 721.3769 | 267.74 | 15.22 | 13.99 | 14.79 | 14.70 | 0.37 |
| 721.3933 | 64.26  | 10.45 | 11.51 | 11.05 | 11.42 | 0.25 |
| 721.4412 | 52.93  | 13.64 | 16.99 | 15.45 | 15.46 | 0.80 |
| 721.4699 | 263.82 | 12.73 | 15.02 | 15.44 | 14.40 | 0.62 |
| 721.5598 | 44.87  | 17.95 | 17.11 | 15.75 | 17.34 | 0.66 |
| 721.5678 | 263.79 | 15.24 | 14.97 | 15.26 | 14.46 | 0.09 |
| 721.6727 | 261.89 | 15.84 | 13.86 | 14.58 | 14.56 | 0.89 |
| 721.9947 | 53.01  | 13.98 | 18.50 | 18.13 | 17.15 | 1.14 |
| 722.0605 | 54.2   | 10.12 | 12.54 | 10.56 | 13.05 | 0.50 |
| 722.3757 | 44.87  | 17.23 | 12.62 | 12.02 | 12.54 | 1.41 |
| 722.4370 | 52.69  | 14.51 | 15.24 | 14.13 | 14.67 | 0.12 |
| 722.5047 | 35.51  | 19.05 | 16.97 | 16.96 | 17.23 | 1.32 |
| 722.5188 | 24.71  | 16.22 | 13.54 | 13.02 | 14.01 | 1.04 |
| 722.5592 | 51.01  | 13.75 | 15.91 | 15.05 | 15.80 | 0.70 |
| 722.7014 | 49.18  | 11.46 | 10.98 | 11.49 | 12.58 | 0.02 |
| 722.8711 | 51.65  | 13.21 | 12.55 | 13.02 | 12.53 | 0.30 |
| 722.9954 | 53.19  | 14.59 | 17.16 | 16.80 | 16.22 | 1.08 |
| 723.4896 | 52.7   | 12.34 | 10.95 | 11.09 | 11.73 | 0.57 |
| 723.5133 | 26.58  | 17.61 | 11.54 | 12.31 | 13.54 | 1.60 |
| 723.6412 | 278.59 | 14.93 | 15.34 | 15.23 | 15.65 | 0.25 |
| 723.7898 | 279.17 | 16.29 | 18.13 | 18.14 | 17.14 | 0.94 |
| 723.9301 | 278.93 | 15.62 | 19.39 | 19.31 | 17.60 | 1.45 |
| 723.9743 | 52.92  | 17.58 | 16.25 | 17.31 | 15.46 | 0.47 |
| 723.9938 | 52.81  | 10.73 | 11.19 | 10.78 | 12.81 | 0.19 |
| 724.0750 | 278.97 | 16.00 | 18.95 | 18.85 | 17.66 | 1.36 |
| 724.2188 | 279.09 | 14.88 | 18.40 | 18.30 | 17.43 | 1.40 |
| 724.3640 | 276.82 | 15.31 | 15.92 | 15.82 | 15.09 | 0.25 |
| 724.4144 | 45.92  | 14.80 | 10.61 | 9.80  | 10.46 | 1.15 |
| 724.4595 | 45.78  | 10.44 | 11.18 | 11.02 | 12.55 | 0.24 |
| 724.4711 | 46.94  | 13.78 | 15.74 | 14.84 | 14.29 | 0.41 |
| 724.5039 | 278.62 | 15.83 | 15.43 | 15.47 | 15.06 | 0.24 |
| 724.5270 | 25.02  | 22.18 | 20.11 | 19.97 | 20.53 | 1.85 |
| 724.5572 | 46.7   | 12.34 | 17.36 | 17.19 | 17.00 | 1.49 |
| 724.9069 | 55.57  | 16.67 | 12.76 | 9.96  | 11.33 | 1.08 |
| 724.9993 | 53.41  | 13.52 | 17.81 | 15.61 | 15.97 | 0.91 |
| 725.4994 | 53.03  | 8.62  | 12.12 | 9.63  | 10.99 | 0.64 |
| 725.5305 | 25.35  | 21.06 | 18.78 | 18.61 | 19.30 | 1.83 |
| 725.8993 | 53.99  | 14.74 | 11.63 | 11.33 | 12.57 | 1.17 |
| 725.9706 | 52.98  | 15.12 | 11.43 | 13.64 | 11.80 | 0.73 |
| 725.9979 | 53.1   | 10.65 | 13.77 | 11.31 | 12.89 | 0.66 |
| 726.4145 | 46.14  | 17.00 | 14.53 | 14.80 | 14.28 | 0.74 |
| 726.4652 | 47.6   | 12.26 | 12.58 | 10.50 | 11.99 | 0.19 |
| 726.5062 | 25.92  | 17.43 | 14.18 | 15.53 | 14.93 | 1.08 |
| 726.5098 | 268.67 | 14.74 | 14.24 | 14.39 | 14.56 | 0.15 |

|          |        |       |       |       |       |      |
|----------|--------|-------|-------|-------|-------|------|
| 726.5493 | 41.9   | 19.58 | 17.67 | 17.60 | 18.17 | 1.44 |
| 726.5889 | 44.52  | 11.00 | 10.95 | 11.32 | 11.67 | 0.08 |
| 726.6466 | 48.08  | 12.07 | 11.35 | 11.27 | 12.81 | 0.25 |
| 726.8914 | 51.81  | 15.42 | 17.48 | 17.42 | 16.64 | 0.98 |
| 726.9807 | 52.86  | 14.25 | 12.41 | 13.15 | 12.67 | 0.59 |
| 727.1016 | 62.69  | 12.66 | 11.49 | 12.56 | 10.84 | 0.31 |
| 727.1228 | 253.61 | 10.85 | 15.72 | 13.64 | 13.38 | 1.06 |
| 727.3360 | 61.23  | 10.90 | 12.28 | 12.43 | 12.09 | 0.55 |
| 727.7652 | 50.11  | 9.02  | 12.12 | 12.34 | 11.03 | 0.97 |
| 727.8349 | 60.56  | 11.75 | 12.48 | 13.20 | 11.43 | 0.28 |
| 727.8785 | 270    | 15.57 | 14.41 | 15.40 | 15.35 | 0.36 |
| 727.8968 | 51.67  | 13.39 | 11.66 | 11.16 | 11.74 | 0.70 |
| 728.0050 | 52.31  | 11.72 | 13.37 | 12.92 | 12.69 | 0.56 |
| 728.0420 | 272.72 | 13.28 | 17.13 | 17.13 | 16.97 | 1.12 |
| 728.1264 | 245.86 | 9.83  | 11.97 | 9.07  | 10.57 | 0.20 |
| 728.2067 | 270.27 | 15.43 | 14.97 | 15.55 | 15.56 | 0.09 |
| 728.3794 | 273.02 | 15.85 | 14.14 | 14.89 | 14.75 | 0.66 |
| 728.4107 | 45.26  | 17.56 | 15.33 | 14.13 | 15.26 | 0.93 |
| 728.5251 | 31.4   | 20.50 | 19.48 | 19.63 | 19.34 | 1.01 |
| 728.5415 | 272.93 | 11.71 | 13.67 | 13.58 | 14.10 | 0.45 |
| 728.5534 | 44.67  | 16.49 | 15.51 | 15.43 | 16.09 | 0.44 |
| 728.6432 | 47.7   | 12.50 | 15.57 | 15.24 | 15.99 | 1.08 |
| 728.8912 | 51.28  | 14.20 | 16.78 | 16.39 | 16.15 | 0.98 |
| 729.4279 | 52.64  | 13.01 | 14.35 | 13.72 | 13.10 | 0.36 |
| 729.5320 | 34.73  | 19.49 | 18.41 | 18.50 | 18.58 | 0.99 |
| 729.7532 | 50.4   | 12.37 | 12.85 | 12.41 | 12.48 | 0.15 |
| 729.8597 | 55.59  | 16.03 | 12.18 | 12.23 | 11.91 | 1.20 |
| 729.9817 | 51.96  | 18.10 | 20.08 | 20.25 | 18.85 | 1.15 |
| 730.1567 | 57.37  | 9.19  | 10.66 | 10.20 | 11.70 | 0.53 |
| 730.4154 | 48.32  | 17.49 | 17.22 | 16.49 | 16.11 | 0.32 |
| 730.4229 | 51.8   | 15.10 | 15.32 | 14.73 | 14.20 | 0.08 |
| 730.5364 | 28.49  | 23.24 | 22.90 | 22.86 | 22.52 | 0.44 |
| 730.6427 | 48.84  | 9.53  | 10.80 | 11.12 | 12.34 | 0.50 |
| 730.8562 | 52.28  | 14.32 | 12.09 | 12.49 | 11.90 | 0.83 |
| 730.9824 | 52.25  | 15.24 | 17.49 | 17.83 | 15.94 | 0.95 |
| 731.4254 | 52.39  | 13.68 | 12.05 | 11.99 | 12.38 | 0.75 |
| 731.5410 | 26.21  | 22.12 | 21.61 | 21.64 | 21.28 | 0.60 |
| 731.7546 | 50.17  | 13.80 | 13.00 | 12.85 | 13.07 | 0.53 |
| 731.9803 | 52.55  | 15.15 | 17.07 | 17.35 | 15.99 | 0.88 |
| 732.4049 | 45.28  | 16.15 | 12.44 | 11.85 | 12.44 | 1.19 |
| 732.5036 | 47.09  | 12.92 | 16.60 | 16.43 | 15.31 | 0.74 |
| 732.5535 | 24.82  | 26.53 | 25.49 | 25.39 | 25.66 | 1.28 |
| 732.8302 | 50.97  | 15.06 | 8.83  | 9.37  | 9.38  | 1.35 |
| 732.9849 | 51.38  | 15.07 | 18.13 | 17.63 | 16.70 | 1.18 |
| 733.0469 | 45.19  | 13.22 | 13.76 | 12.17 | 12.96 | 0.06 |
| 733.1360 | 84.15  | 9.25  | 11.28 | 12.99 | 12.17 | 0.66 |
| 733.5566 | 25.52  | 25.26 | 24.31 | 24.18 | 24.38 | 1.23 |
| 733.9769 | 49.13  | 12.68 | 12.25 | 12.34 | 11.56 | 0.24 |
| 733.9854 | 51.54  | 13.34 | 17.01 | 15.78 | 15.18 | 1.00 |
| 734.0645 | 258.75 | 12.81 | 12.79 | 14.22 | 13.71 | 0.20 |
| 734.5005 | 47.45  | 12.67 | 15.73 | 15.81 | 15.73 | 0.82 |
| 734.5693 | 29.35  | 24.21 | 22.50 | 22.46 | 23.32 | 1.42 |
| 735.0490 | 201.55 | 7.77  | 13.07 | 14.42 | 12.37 | 1.59 |
| 735.5709 | 25.09  | 22.77 | 20.73 | 20.82 | 21.62 | 1.42 |
| 735.9281 | 54.87  | 16.91 | 14.04 | 11.97 | 13.00 | 0.87 |
| 735.9912 | 53.43  | 18.09 | 20.42 | 19.89 | 19.01 | 1.02 |

|          |        |       |       |       |       |      |
|----------|--------|-------|-------|-------|-------|------|
| 736.4455 | 47.14  | 17.25 | 15.81 | 14.97 | 15.92 | 0.77 |
| 736.4913 | 48.78  | 12.39 | 13.38 | 11.19 | 13.26 | 0.05 |
| 736.5808 | 33.35  | 20.72 | 19.03 | 19.09 | 19.82 | 1.30 |
| 736.9232 | 53.46  | 14.84 | 13.69 | 12.29 | 13.83 | 0.77 |
| 736.9935 | 53.32  | 14.52 | 17.27 | 15.56 | 16.40 | 0.76 |
| 737.4108 | 52.35  | 12.75 | 13.20 | 12.89 | 12.15 | 0.08 |
| 737.5339 | 54.77  | 14.00 | 10.97 | 11.39 | 13.61 | 0.58 |
| 737.5779 | 26.4   | 17.67 | 10.75 | 10.78 | 12.94 | 1.31 |
| 737.9880 | 53.25  | 14.85 | 17.45 | 16.55 | 15.40 | 0.71 |
| 738.4115 | 52.42  | 12.70 | 13.31 | 13.39 | 12.21 | 0.21 |
| 738.4445 | 46.02  | 17.36 | 16.63 | 15.57 | 16.30 | 0.43 |
| 738.5061 | 28.1   | 19.22 | 16.62 | 16.94 | 17.03 | 1.58 |
| 738.5369 | 42.45  | 17.51 | 14.33 | 14.28 | 15.55 | 1.20 |
| 738.5864 | 47.44  | 13.39 | 11.87 | 12.16 | 12.97 | 0.71 |
| 738.6753 | 48.84  | 11.78 | 11.59 | 11.88 | 12.93 | 0.06 |
| 738.9692 | 52.72  | 12.12 | 11.83 | 12.45 | 11.24 | 0.05 |
| 739.5103 | 27.73  | 17.49 | 13.35 | 13.86 | 14.84 | 1.36 |
| 740.1890 | 64.66  | 15.93 | 18.85 | 17.41 | 17.57 | 0.82 |
| 740.4426 | 46.27  | 17.38 | 15.50 | 14.87 | 15.38 | 0.79 |
| 740.5328 | 35.36  | 21.07 | 20.01 | 19.83 | 19.94 | 1.26 |
| 740.6690 | 49.14  | 10.30 | 11.10 | 11.54 | 12.23 | 0.46 |
| 740.9764 | 52.81  | 12.54 | 16.52 | 16.51 | 14.40 | 1.21 |
| 741.0398 | 53.67  | 12.51 | 12.38 | 12.26 | 12.98 | 0.03 |
| 741.1937 | 63.7   | 14.18 | 16.06 | 13.94 | 15.16 | 0.30 |
| 741.5286 | 32.16  | 19.98 | 17.68 | 17.57 | 18.17 | 1.64 |
| 741.8767 | 53.75  | 13.20 | 10.74 | 10.62 | 10.47 | 0.87 |
| 741.8770 | 238.75 | 11.48 | 12.13 | 12.76 | 12.44 | 0.31 |
| 741.9679 | 52.78  | 12.84 | 13.24 | 13.09 | 13.10 | 0.20 |
| 742.1332 | 242.96 | 11.23 | 13.17 | 13.91 | 13.55 | 0.73 |
| 742.1940 | 59.94  | 12.32 | 10.89 | 10.28 | 11.64 | 0.49 |
| 742.2011 | 292.05 | 15.83 | 15.21 | 17.26 | 16.03 | 0.12 |
| 742.3829 | 242.99 | 11.57 | 12.78 | 13.59 | 12.99 | 0.49 |
| 742.4318 | 45.82  | 15.25 | 13.13 | 12.45 | 14.10 | 1.12 |
| 742.4804 | 41.41  | 13.39 | 14.01 | 14.46 | 13.32 | 0.24 |
| 742.5337 | 41.02  | 18.98 | 17.21 | 17.19 | 17.57 | 1.63 |
| 742.5739 | 25.67  | 19.05 | 17.00 | 17.29 | 17.87 | 1.43 |
| 742.6218 | 47.67  | 8.54  | 10.76 | 10.44 | 11.64 | 0.67 |
| 742.6314 | 240.1  | 9.96  | 12.02 | 12.13 | 12.40 | 0.56 |
| 742.8662 | 51.33  | 15.82 | 17.84 | 17.88 | 17.14 | 1.16 |
| 743.5418 | 43.05  | 17.64 | 17.50 | 16.49 | 17.26 | 0.33 |
| 743.5775 | 25.46  | 17.51 | 11.98 | 13.43 | 14.61 | 1.49 |
| 743.8672 | 52.75  | 12.67 | 12.86 | 13.10 | 12.58 | 0.10 |
| 743.9784 | 52.88  | 14.17 | 18.01 | 17.43 | 16.35 | 1.27 |
| 744.0488 | 51.93  | 10.92 | 12.76 | 11.18 | 12.57 | 0.34 |
| 744.4779 | 48.02  | 14.79 | 14.90 | 13.10 | 14.80 | 0.21 |
| 744.4926 | 41.57  | 16.41 | 14.63 | 14.91 | 15.18 | 0.56 |
| 744.5433 | 37.33  | 20.02 | 18.97 | 18.83 | 19.26 | 1.22 |
| 744.5894 | 26.14  | 20.07 | 18.12 | 18.27 | 18.63 | 1.63 |
| 744.6181 | 47.11  | 10.28 | 15.75 | 15.01 | 16.05 | 1.24 |
| 744.8664 | 51.64  | 14.83 | 17.34 | 17.34 | 16.59 | 1.16 |
| 744.9753 | 50.03  | 12.62 | 15.44 | 14.09 | 13.98 | 0.71 |
| 744.9848 | 52.45  | 14.15 | 12.69 | 12.33 | 12.73 | 0.84 |
| 745.3998 | 51.98  | 11.52 | 11.98 | 12.09 | 11.17 | 0.13 |
| 745.5564 | 25.66  | 18.65 | 14.98 | 16.30 | 17.07 | 1.50 |
| 745.5932 | 25.67  | 18.78 | 15.13 | 16.24 | 16.95 | 1.44 |
| 745.7358 | 49.8   | 11.43 | 11.87 | 11.96 | 11.33 | 0.13 |

|          |        |       |       |       |       |      |
|----------|--------|-------|-------|-------|-------|------|
| 745.9561 | 52.45  | 17.39 | 17.31 | 18.19 | 16.17 | 0.05 |
| 746.2116 | 275.75 | 15.14 | 14.72 | 15.25 | 15.00 | 0.11 |
| 746.3005 | 277.28 | 15.81 | 16.09 | 15.90 | 16.38 | 0.13 |
| 746.3840 | 272.34 | 16.04 | 16.10 | 16.41 | 16.61 | 0.14 |
| 746.3976 | 52.55  | 14.67 | 12.90 | 12.98 | 12.57 | 0.72 |
| 746.5166 | 33.96  | 17.45 | 10.58 | 12.62 | 12.95 | 1.32 |
| 746.5348 | 37.03  | 11.73 | 10.19 | 13.45 | 9.38  | 0.08 |
| 746.5459 | 276.39 | 15.74 | 15.02 | 14.73 | 14.73 | 0.38 |
| 746.5681 | 25.74  | 20.31 | 18.40 | 18.61 | 19.00 | 1.69 |
| 746.6111 | 36.92  | 19.02 | 15.55 | 15.76 | 16.87 | 1.36 |
| 746.6302 | 275.16 | 15.16 | 15.01 | 14.59 | 14.48 | 0.15 |
| 746.7973 | 279.3  | 15.43 | 15.44 | 15.77 | 15.97 | 0.12 |
| 746.8576 | 51.27  | 13.39 | 12.03 | 11.96 | 12.68 | 0.66 |
| 746.9422 | 277.78 | 13.96 | 15.66 | 16.01 | 16.33 | 0.72 |
| 746.9500 | 54.4   | 17.69 | 17.46 | 16.23 | 15.63 | 0.36 |
| 746.9836 | 53.32  | 14.14 | 13.65 | 12.25 | 13.81 | 0.53 |
| 747.0849 | 278.04 | 16.23 | 16.00 | 16.00 | 16.66 | 0.07 |
| 747.2286 | 279.56 | 12.87 | 16.76 | 16.42 | 16.40 | 1.12 |
| 747.3720 | 279.32 | 15.72 | 16.65 | 16.26 | 16.68 | 0.44 |
| 747.5122 | 279.57 | 15.89 | 16.67 | 16.05 | 16.06 | 0.18 |
| 747.5722 | 25.71  | 19.08 | 15.87 | 16.93 | 17.48 | 1.39 |
| 747.6087 | 26.35  | 17.63 | 9.70  | 11.89 | 12.06 | 1.54 |
| 747.9515 | 53.33  | 15.56 | 14.03 | 13.80 | 12.94 | 0.82 |
| 748.2933 | 186.68 | 11.92 | 12.61 | 12.15 | 13.20 | 0.21 |
| 748.3057 | 174.4  | 7.41  | 11.00 | 11.05 | 10.99 | 1.36 |
| 748.4589 | 44.79  | 13.80 | 12.86 | 11.33 | 12.99 | 0.64 |
| 748.4755 | 45.82  | 16.26 | 17.25 | 16.47 | 17.15 | 0.23 |
| 748.5275 | 27.85  | 22.58 | 20.67 | 20.78 | 21.34 | 1.71 |
| 748.5606 | 45.34  | 9.90  | 13.85 | 12.88 | 13.01 | 0.96 |
| 748.6992 | 47.6   | 8.77  | 10.47 | 9.98  | 12.52 | 0.39 |
| 748.9578 | 52.43  | 13.68 | 14.98 | 15.74 | 13.01 | 0.36 |
| 749.0830 | 240.72 | 14.67 | 17.04 | 17.47 | 17.18 | 1.00 |
| 749.1194 | 111.45 | 11.01 | 12.94 | 12.28 | 12.84 | 0.63 |
| 749.1278 | 117.04 | 8.76  | 12.49 | 12.19 | 12.47 | 1.54 |
| 749.2845 | 173.06 | 12.42 | 12.55 | 12.36 | 12.96 | 0.06 |
| 749.3768 | 118.74 | 7.83  | 13.83 | 13.28 | 13.23 | 1.89 |
| 749.3901 | 276.14 | 16.08 | 15.84 | 16.04 | 16.36 | 0.04 |
| 749.5303 | 26.36  | 21.42 | 19.46 | 19.62 | 20.31 | 1.71 |
| 749.6246 | 118.26 | 8.81  | 13.65 | 13.12 | 12.35 | 1.51 |
| 749.8740 | 118.21 | 7.64  | 12.31 | 12.39 | 11.18 | 1.52 |
| 749.8933 | 281.87 | 17.13 | 16.20 | 16.20 | 16.74 | 0.42 |
| 749.9441 | 282.93 | 16.28 | 15.56 | 15.30 | 15.49 | 0.26 |
| 749.9854 | 51.2   | 11.96 | 16.00 | 14.70 | 15.75 | 0.99 |
| 749.9929 | 282.96 | 15.53 | 16.00 | 15.77 | 15.95 | 0.13 |
| 750.0486 | 277.19 | 15.41 | 14.54 | 14.20 | 15.22 | 0.24 |
| 750.0807 | 229.06 | 8.97  | 11.61 | 11.92 | 11.76 | 1.14 |
| 750.0902 | 240.15 | 12.28 | 13.04 | 13.00 | 14.64 | 0.26 |
| 750.1437 | 281.75 | 17.01 | 15.71 | 15.34 | 16.27 | 0.55 |
| 750.4189 | 54.05  | 12.53 | 14.52 | 12.93 | 13.66 | 0.45 |
| 750.4727 | 46.18  | 16.06 | 16.11 | 15.51 | 16.43 | 0.07 |
| 750.5532 | 35.16  | 21.88 | 20.22 | 20.08 | 20.39 | 1.45 |
| 750.5677 | 47.55  | 12.44 | 16.37 | 15.87 | 15.45 | 1.39 |
| 751.2261 | 276.83 | 15.85 | 15.95 | 15.76 | 15.92 | 0.02 |
| 751.3685 | 278.04 | 15.31 | 16.09 | 16.75 | 16.03 | 0.58 |
| 751.4182 | 52.33  | 11.93 | 13.63 | 11.36 | 13.51 | 0.24 |
| 751.5163 | 277.89 | 15.63 | 15.13 | 15.24 | 15.34 | 0.22 |

|          |        |       |       |       |       |      |
|----------|--------|-------|-------|-------|-------|------|
| 751.5395 | 30.91  | 20.92 | 19.71 | 19.12 | 19.61 | 1.41 |
| 751.6574 | 278.18 | 15.31 | 15.98 | 15.61 | 15.94 | 0.31 |
| 751.7763 | 266.59 | 15.62 | 13.96 | 15.20 | 14.81 | 0.54 |
| 751.8758 | 267.16 | 15.60 | 15.43 | 15.52 | 15.84 | 0.05 |
| 751.9047 | 54.79  | 15.71 | 14.26 | 12.40 | 13.03 | 0.57 |
| 751.9649 | 52.62  | 17.84 | 19.94 | 20.00 | 18.51 | 1.03 |
| 751.9750 | 265.36 | 15.56 | 15.51 | 16.21 | 15.91 | 0.17 |
| 752.0288 | 31.08  | 12.11 | 18.28 | 13.39 | 16.86 | 0.98 |
| 752.0778 | 267.4  | 15.82 | 15.41 | 15.44 | 15.73 | 0.20 |
| 752.1332 | 57.74  | 9.56  | 10.86 | 11.53 | 11.06 | 0.66 |
| 752.1762 | 267.19 | 15.36 | 14.77 | 14.93 | 14.54 | 0.30 |
| 752.2785 | 266.95 | 15.61 | 14.73 | 15.31 | 15.14 | 0.34 |
| 752.4600 | 50.44  | 14.37 | 12.69 | 12.29 | 13.19 | 1.02 |
| 752.4744 | 48.64  | 12.75 | 14.31 | 11.69 | 13.11 | 0.13 |
| 752.5237 | 39.04  | 17.77 | 16.88 | 16.75 | 16.53 | 0.64 |
| 752.5615 | 32.64  | 20.89 | 19.33 | 18.85 | 19.39 | 1.54 |
| 752.6510 | 47.92  | 8.89  | 11.08 | 10.79 | 11.27 | 0.64 |
| 752.8977 | 54.08  | 13.56 | 12.63 | 11.83 | 12.36 | 0.44 |
| 752.9633 | 52.83  | 13.56 | 17.27 | 17.31 | 14.99 | 1.07 |
| 753.5248 | 35.88  | 16.12 | 12.41 | 13.50 | 12.95 | 1.05 |
| 753.5617 | 25.05  | 19.85 | 16.46 | 16.49 | 17.22 | 1.75 |
| 753.9607 | 52.52  | 14.66 | 15.15 | 15.05 | 14.32 | 0.21 |
| 754.1775 | 217.87 | 7.58  | 13.39 | 11.38 | 12.13 | 1.32 |
| 754.5026 | 45.01  | 12.15 | 13.77 | 12.21 | 14.72 | 0.37 |
| 754.5361 | 35.87  | 21.36 | 20.44 | 20.18 | 20.28 | 1.03 |
| 754.5658 | 39.85  | 16.31 | 12.83 | 11.97 | 14.13 | 1.20 |
| 754.6460 | 47.75  | 11.71 | 12.28 | 12.38 | 13.56 | 0.37 |
| 754.6791 | 43.35  | 9.99  | 11.53 | 10.67 | 12.78 | 0.42 |
| 754.9647 | 53.34  | 12.48 | 13.88 | 13.09 | 12.05 | 0.30 |
| 755.0343 | 53.18  | 12.56 | 12.72 | 12.14 | 12.47 | 0.04 |
| 755.5392 | 34.18  | 20.28 | 19.29 | 19.09 | 19.01 | 1.10 |
| 755.9679 | 53.13  | 12.90 | 13.06 | 12.06 | 12.49 | 0.14 |
| 756.4271 | 47.28  | 13.22 | 12.51 | 11.40 | 11.54 | 0.38 |
| 756.5060 | 46.19  | 17.03 | 17.76 | 17.20 | 17.38 | 0.26 |
| 756.5534 | 28.64  | 23.34 | 22.35 | 22.45 | 22.25 | 1.11 |
| 756.8855 | 265.19 | 15.16 | 14.37 | 15.01 | 14.22 | 0.25 |
| 757.0792 | 59.58  | 11.82 | 11.71 | 11.53 | 11.11 | 0.12 |
| 757.5560 | 27.61  | 21.84 | 21.15 | 21.30 | 21.06 | 0.72 |
| 757.8890 | 48.28  | 12.18 | 12.28 | 12.94 | 12.59 | 0.15 |
| 757.9713 | 53.49  | 18.07 | 20.27 | 19.69 | 18.66 | 0.86 |
| 758.1384 | 47.7   | 12.37 | 12.83 | 13.36 | 12.91 | 0.29 |
| 758.4032 | 52.38  | 12.97 | 12.64 | 12.59 | 12.41 | 0.18 |
| 758.5042 | 46.04  | 17.18 | 17.99 | 17.35 | 17.65 | 0.35 |
| 758.5693 | 24.78  | 25.81 | 24.81 | 24.86 | 25.06 | 1.25 |
| 758.7758 | 252.79 | 15.55 | 14.84 | 15.37 | 15.61 | 0.20 |
| 758.8406 | 51.27  | 14.86 | 14.56 | 14.33 | 13.79 | 0.36 |
| 758.9720 | 254.58 | 13.46 | 15.19 | 17.59 | 16.65 | 0.88 |
| 758.9734 | 53.5   | 14.61 | 16.32 | 14.92 | 15.28 | 0.46 |
| 759.1661 | 251.42 | 14.89 | 12.72 | 13.74 | 13.76 | 0.76 |
| 759.1748 | 255.12 | 12.50 | 14.48 | 16.98 | 16.02 | 0.97 |
| 759.3778 | 250.53 | 14.48 | 13.29 | 14.40 | 13.78 | 0.45 |
| 759.4048 | 52.77  | 11.89 | 13.38 | 12.94 | 12.94 | 0.51 |
| 759.5721 | 24.63  | 24.59 | 23.72 | 23.74 | 23.86 | 1.15 |
| 759.9696 | 53.65  | 14.30 | 14.67 | 13.91 | 13.72 | 0.03 |
| 760.5067 | 47.06  | 12.79 | 15.44 | 15.11 | 15.86 | 0.71 |
| 760.5838 | 25.4   | 24.70 | 23.34 | 23.29 | 23.67 | 1.54 |

|          |        |       |       |       |       |      |
|----------|--------|-------|-------|-------|-------|------|
| 760.8266 | 54.11  | 13.70 | 14.56 | 14.28 | 13.32 | 0.26 |
| 760.8402 | 51.23  | 15.25 | 16.40 | 16.52 | 15.05 | 0.57 |
| 760.9490 | 52.03  | 11.89 | 11.80 | 12.33 | 11.86 | 0.05 |
| 761.5877 | 25.34  | 23.62 | 22.11 | 22.14 | 22.46 | 1.69 |
| 762.1729 | 64.35  | 12.54 | 13.65 | 12.05 | 11.97 | 0.09 |
| 762.5090 | 41.34  | 18.05 | 16.90 | 17.15 | 16.65 | 0.61 |
| 762.5270 | 52.3   | 14.11 | 14.32 | 13.91 | 14.05 | 0.01 |
| 762.5423 | 24.55  | 16.25 | 8.91  | 9.95  | 11.78 | 1.54 |
| 762.5925 | 29.16  | 21.77 | 20.07 | 20.07 | 20.22 | 1.61 |
| 762.9280 | 54.39  | 16.28 | 15.32 | 14.11 | 12.24 | 0.45 |
| 762.9501 | 52.99  | 13.45 | 12.78 | 12.68 | 12.58 | 0.46 |
| 763.0236 | 52.71  | 13.17 | 12.76 | 12.95 | 13.38 | 0.11 |
| 763.3248 | 275.42 | 15.62 | 15.70 | 16.25 | 16.00 | 0.18 |
| 763.3989 | 275.86 | 16.66 | 16.21 | 16.12 | 16.60 | 0.23 |
| 763.5159 | 48.39  | 14.49 | 13.33 | 13.06 | 13.75 | 0.52 |
| 763.5330 | 27.81  | 13.14 | 13.21 | 10.52 | 13.24 | 0.26 |
| 763.5944 | 25.9   | 19.37 | 15.87 | 16.43 | 17.17 | 1.55 |
| 763.9551 | 52.88  | 12.36 | 12.73 | 12.90 | 12.34 | 0.19 |
| 764.0315 | 28.63  | 12.64 | 14.42 | 11.27 | 13.78 | 0.18 |
| 764.4585 | 47.35  | 14.06 | 13.62 | 13.08 | 13.44 | 0.29 |
| 764.5567 | 27.04  | 18.65 | 16.76 | 16.98 | 17.19 | 1.36 |
| 764.6821 | 48.39  | 9.54  | 10.97 | 11.23 | 12.22 | 0.52 |
| 764.8055 | 43.42  | 10.20 | 10.58 | 10.71 | 12.48 | 0.25 |
| 765.2460 | 73.3   | 11.52 | 12.29 | 10.64 | 10.53 | 0.04 |
| 765.5605 | 25.21  | 17.47 | 11.84 | 13.93 | 14.47 | 1.34 |
| 765.9567 | 52.93  | 10.52 | 13.20 | 12.61 | 12.07 | 0.70 |
| 766.0250 | 52.98  | 12.52 | 12.44 | 11.90 | 12.40 | 0.15 |
| 766.0434 | 26.36  | 14.18 | 16.61 | 13.63 | 16.55 | 0.52 |
| 766.3693 | 63.87  | 10.37 | 11.81 | 12.30 | 11.29 | 0.68 |
| 766.4534 | 46.95  | 14.29 | 14.03 | 12.91 | 13.70 | 0.34 |
| 766.5174 | 52.39  | 11.89 | 13.65 | 12.77 | 14.25 | 0.59 |
| 766.5360 | 33.85  | 20.79 | 20.29 | 19.84 | 19.90 | 0.81 |
| 766.5742 | 25.56  | 22.44 | 21.36 | 21.27 | 21.25 | 1.08 |
| 766.7026 | 63.31  | 10.74 | 12.06 | 12.82 | 11.99 | 0.65 |
| 767.3925 | 51.96  | 12.15 | 12.84 | 13.12 | 12.28 | 0.34 |
| 767.5404 | 25.13  | 19.80 | 17.44 | 17.48 | 17.73 | 1.72 |
| 767.5774 | 25.16  | 21.35 | 20.19 | 20.14 | 20.09 | 1.07 |
| 767.9362 | 52.21  | 16.39 | 16.52 | 17.20 | 15.57 | 0.16 |
| 768.4938 | 39.64  | 17.03 | 17.82 | 18.37 | 17.75 | 0.76 |
| 768.5172 | 44.55  | 10.66 | 11.68 | 11.34 | 12.08 | 0.32 |
| 768.5437 | 34.81  | 20.80 | 19.20 | 19.02 | 19.44 | 1.55 |
| 768.5898 | 25.26  | 21.78 | 20.62 | 20.50 | 20.33 | 1.17 |
| 768.9352 | 53.28  | 13.59 | 11.73 | 12.14 | 10.45 | 0.63 |
| 768.9681 | 264.76 | 15.66 | 14.73 | 15.39 | 15.29 | 0.32 |
| 769.0611 | 262.18 | 14.71 | 15.60 | 16.24 | 16.06 | 0.49 |
| 769.1527 | 264.97 | 16.05 | 15.35 | 16.02 | 15.38 | 0.25 |
| 769.2421 | 263.19 | 16.38 | 16.00 | 16.10 | 16.50 | 0.15 |
| 769.3314 | 262.74 | 14.15 | 15.52 | 15.77 | 16.26 | 0.58 |
| 769.4219 | 262.02 | 15.07 | 15.18 | 15.65 | 15.01 | 0.13 |
| 769.4990 | 43.96  | 16.11 | 15.15 | 16.02 | 14.58 | 0.30 |
| 769.5178 | 263.63 | 16.12 | 14.31 | 14.51 | 15.08 | 0.74 |
| 769.5566 | 25.65  | 19.98 | 17.05 | 17.31 | 17.60 | 1.80 |
| 769.5931 | 25.29  | 20.81 | 19.39 | 19.28 | 19.33 | 1.47 |
| 769.9320 | 52.43  | 14.79 | 12.54 | 13.06 | 12.53 | 0.97 |
| 769.9776 | 255.75 | 15.40 | 12.89 | 14.15 | 13.99 | 0.83 |
| 770.1757 | 255.29 | 14.78 | 14.14 | 15.36 | 14.65 | 0.07 |

|          |        |       |       |       |       |      |
|----------|--------|-------|-------|-------|-------|------|
| 770.3765 | 256.02 | 14.84 | 14.18 | 15.48 | 14.68 | 0.07 |
| 770.3967 | 46.02  | 12.04 | 11.31 | 10.72 | 11.42 | 0.32 |
| 770.5091 | 37.41  | 20.56 | 20.98 | 21.42 | 21.01 | 0.48 |
| 770.5671 | 27.78  | 18.09 | 11.90 | 12.66 | 14.72 | 1.56 |
| 770.5738 | 259.88 | 14.64 | 13.53 | 13.85 | 14.31 | 0.26 |
| 770.6015 | 26.3   | 18.81 | 15.78 | 16.05 | 16.82 | 1.21 |
| 770.9422 | 52.58  | 13.79 | 12.04 | 12.88 | 12.02 | 0.65 |
| 771.5124 | 38.25  | 19.40 | 19.66 | 20.22 | 19.55 | 0.38 |
| 771.5722 | 29.51  | 15.84 | 8.79  | 9.04  | 10.50 | 1.54 |
| 771.6082 | 25.48  | 16.72 | 9.91  | 10.07 | 12.76 | 1.32 |
| 772.4813 | 46.35  | 13.35 | 11.56 | 11.42 | 12.26 | 0.90 |
| 772.5072 | 41.41  | 11.99 | 12.74 | 13.72 | 11.13 | 0.23 |
| 772.5282 | 32.13  | 20.24 | 17.83 | 18.44 | 18.95 | 1.08 |
| 772.5844 | 25.2   | 18.53 | 14.57 | 16.33 | 16.84 | 1.35 |
| 772.6219 | 38.73  | 16.47 | 12.51 | 12.25 | 13.47 | 1.25 |
| 773.0764 | 55.65  | 19.24 | 21.92 | 21.57 | 21.62 | 1.28 |
| 773.5038 | 52.37  | 14.30 | 13.53 | 13.35 | 12.91 | 0.56 |
| 773.5244 | 37.18  | 19.16 | 18.21 | 17.94 | 18.51 | 0.67 |
| 773.5879 | 25.41  | 17.03 | 9.67  | 10.35 | 12.45 | 1.44 |
| 773.9469 | 52.78  | 16.55 | 17.59 | 17.70 | 16.72 | 0.82 |
| 774.0783 | 54.56  | 15.55 | 19.46 | 18.96 | 18.98 | 1.24 |
| 774.4800 | 46.53  | 13.32 | 14.94 | 14.27 | 14.29 | 0.50 |
| 774.5166 | 51.27  | 11.51 | 13.03 | 12.93 | 13.39 | 0.60 |
| 774.5491 | 29.15  | 21.34 | 19.23 | 19.46 | 19.87 | 1.62 |
| 774.5988 | 28     | 15.48 | 8.00  | 7.32  | 8.97  | 1.51 |
| 774.9477 | 53.05  | 13.52 | 13.87 | 13.58 | 12.58 | 0.02 |
| 775.0730 | 55.1   | 17.10 | 19.97 | 19.52 | 19.58 | 1.29 |
| 775.5242 | 28.82  | 11.30 | 13.84 | 10.39 | 13.47 | 0.35 |
| 775.5443 | 25.16  | 20.38 | 17.96 | 17.87 | 18.72 | 1.70 |
| 775.9417 | 53     | 14.47 | 14.95 | 14.81 | 13.94 | 0.17 |
| 776.0258 | 25.96  | 11.10 | 13.50 | 9.42  | 12.75 | 0.22 |
| 776.0753 | 54.94  | 12.89 | 16.71 | 15.56 | 16.12 | 0.92 |
| 776.1361 | 193.71 | 6.77  | 9.81  | 10.53 | 9.88  | 1.06 |
| 776.1505 | 195.84 | 9.22  | 12.25 | 13.09 | 12.55 | 1.23 |
| 776.4847 | 44.8   | 13.27 | 14.13 | 12.03 | 13.29 | 0.02 |
| 776.5134 | 53.15  | 12.70 | 14.04 | 12.93 | 13.73 | 0.36 |
| 776.5277 | 38.2   | 11.24 | 19.13 | 14.58 | 17.92 | 1.31 |
| 776.5524 | 34.51  | 20.87 | 20.11 | 19.21 | 19.96 | 1.04 |
| 776.5737 | 46.26  | 9.63  | 13.28 | 13.08 | 13.68 | 1.13 |
| 776.8068 | 51.24  | 13.76 | 12.18 | 11.96 | 11.19 | 0.70 |
| 777.0358 | 27.12  | 13.96 | 18.75 | 14.77 | 18.14 | 1.03 |
| 777.0699 | 55.08  | 13.56 | 14.15 | 13.44 | 15.01 | 0.14 |
| 777.5104 | 53.27  | 10.47 | 12.20 | 10.73 | 11.36 | 0.35 |
| 777.5543 | 25.31  | 19.57 | 18.43 | 16.33 | 18.23 | 1.07 |
| 777.8828 | 144.84 | 7.18  | 13.05 | 12.04 | 12.43 | 1.83 |
| 778.0437 | 27.23  | 14.46 | 18.07 | 13.92 | 17.83 | 0.69 |
| 778.1359 | 145.57 | 7.31  | 13.28 | 12.59 | 12.84 | 1.82 |
| 778.1449 | 64.66  | 10.22 | 11.10 | 10.44 | 11.13 | 0.24 |
| 778.4277 | 45.99  | 12.46 | 11.46 | 11.31 | 12.09 | 0.46 |
| 778.5392 | 28.64  | 19.43 | 18.13 | 18.73 | 18.57 | 0.94 |
| 778.5705 | 36.34  | 19.59 | 16.42 | 16.50 | 17.61 | 1.45 |
| 779.2502 | 266.57 | 15.81 | 13.70 | 14.68 | 14.97 | 0.79 |
| 779.3392 | 266.1  | 13.81 | 16.15 | 16.23 | 16.44 | 0.83 |
| 779.4254 | 268.82 | 16.40 | 16.58 | 16.36 | 16.63 | 0.07 |
| 779.5185 | 273.63 | 15.85 | 18.30 | 18.41 | 17.83 | 0.97 |
| 779.5400 | 26.14  | 18.59 | 16.53 | 17.32 | 17.01 | 1.09 |



|          |        |       |       |       |       |      |
|----------|--------|-------|-------|-------|-------|------|
| 779.5771 | 24.28  | 18.21 | 12.46 | 11.95 | 13.64 | 1.47 |
| 779.6109 | 269.85 | 16.66 | 18.02 | 17.59 | 17.54 | 0.66 |
| 779.7058 | 273.06 | 15.88 | 17.68 | 17.46 | 17.35 | 0.82 |
| 779.7905 | 267.02 | 16.03 | 17.54 | 17.06 | 17.33 | 0.69 |
| 779.8718 | 264.82 | 15.35 | 13.84 | 14.01 | 14.13 | 0.61 |
| 779.8837 | 269.39 | 16.57 | 17.98 | 17.34 | 17.47 | 0.55 |
| 779.9801 | 265.66 | 16.25 | 15.32 | 15.44 | 15.70 | 0.51 |
| 780.0652 | 264.89 | 15.53 | 14.21 | 15.19 | 14.76 | 0.43 |
| 780.2495 | 71.79  | 9.42  | 10.66 | 10.05 | 10.42 | 0.42 |
| 780.2859 | 45.09  | 15.72 | 7.57  | 7.42  | 8.01  | 1.74 |
| 780.4251 | 46.17  | 14.17 | 12.17 | 12.37 | 13.09 | 0.97 |
| 780.4383 | 47.74  | 13.67 | 12.81 | 12.10 | 12.73 | 0.42 |
| 780.5525 | 30.67  | 23.04 | 22.41 | 22.53 | 22.17 | 0.69 |
| 781.4985 | 52.89  | 12.34 | 12.71 | 13.64 | 11.85 | 0.17 |
| 781.5560 | 31.55  | 21.78 | 21.28 | 21.45 | 21.07 | 0.48 |
| 782.0622 | 52.36  | 13.86 | 12.21 | 13.13 | 13.51 | 0.29 |
| 782.2831 | 45.09  | 17.43 | 10.24 | 10.45 | 11.16 | 1.85 |
| 782.4350 | 48.65  | 13.03 | 12.99 | 11.50 | 12.30 | 0.23 |
| 782.5142 | 46.78  | 15.00 | 16.00 | 14.82 | 16.05 | 0.22 |
| 782.5684 | 24.84  | 25.59 | 24.68 | 24.59 | 24.69 | 1.10 |
| 783.5722 | 24.4   | 24.40 | 23.65 | 23.55 | 23.55 | 0.90 |
| 783.9138 | 52.61  | 15.71 | 12.34 | 13.87 | 12.26 | 0.80 |
| 783.9449 | 52.52  | 10.31 | 11.85 | 9.93  | 11.18 | 0.27 |
| 784.1570 | 64.16  | 11.87 | 11.76 | 10.90 | 11.42 | 0.19 |
| 784.2801 | 45.07  | 17.38 | 9.03  | 10.07 | 11.06 | 1.76 |
| 784.4990 | 53.02  | 11.41 | 13.07 | 12.22 | 12.86 | 0.40 |
| 784.5145 | 47.48  | 14.31 | 16.53 | 16.09 | 16.56 | 0.87 |
| 784.5818 | 25.27  | 23.35 | 22.50 | 22.52 | 22.40 | 0.86 |
| 784.9473 | 52.29  | 13.25 | 12.07 | 11.66 | 12.72 | 0.67 |
| 785.0005 | 52.76  | 11.37 | 11.80 | 11.10 | 11.84 | 0.07 |
| 785.4698 | 34.6   | 15.91 | 14.35 | 14.50 | 14.95 | 1.02 |
| 785.4995 | 52.64  | 12.93 | 12.82 | 12.48 | 12.78 | 0.11 |
| 785.5878 | 25.3   | 22.19 | 21.23 | 21.33 | 21.20 | 0.93 |
| 786.1674 | 305.88 | 15.76 | 15.82 | 14.92 | 14.84 | 0.21 |
| 786.2774 | 44.74  | 17.14 | 9.31  | 9.95  | 11.06 | 1.79 |
| 786.4810 | 43.14  | 16.95 | 15.39 | 15.55 | 16.50 | 0.88 |
| 786.5094 | 46.36  | 14.65 | 12.85 | 12.98 | 13.71 | 0.74 |
| 786.5984 | 26.89  | 22.81 | 21.91 | 21.97 | 22.25 | 1.07 |
| 786.8454 | 51.2   | 13.71 | 12.06 | 12.35 | 12.74 | 0.75 |
| 787.2188 | 74.78  | 11.85 | 11.83 | 9.92  | 11.65 | 0.27 |
| 787.4824 | 38.52  | 16.08 | 13.65 | 14.37 | 14.59 | 0.89 |
| 787.4984 | 51.26  | 13.79 | 12.99 | 12.84 | 12.89 | 0.38 |
| 787.6030 | 25.43  | 22.21 | 20.72 | 20.82 | 20.95 | 1.52 |
| 788.2745 | 44.21  | 16.41 | 8.39  | 8.44  | 9.49  | 1.84 |
| 788.3789 | 50.42  | 12.17 | 11.82 | 11.25 | 11.79 | 0.22 |
| 788.4578 | 45.8   | 13.34 | 11.90 | 12.07 | 12.98 | 0.58 |
| 788.5021 | 49.7   | 13.31 | 14.03 | 12.64 | 13.98 | 0.07 |
| 788.5235 | 25.13  | 18.20 | 15.94 | 15.36 | 16.45 | 1.37 |
| 788.5459 | 27.26  | 16.58 | 16.60 | 15.54 | 15.90 | 0.26 |
| 788.6104 | 27.32  | 21.04 | 18.89 | 18.91 | 19.64 | 1.66 |
| 789.0329 | 26.15  | 14.39 | 15.23 | 13.84 | 15.55 | 0.22 |
| 789.0471 | 48.88  | 17.36 | 18.55 | 17.01 | 18.75 | 0.24 |
| 789.4135 | 282.89 | 16.73 | 16.11 | 15.82 | 16.62 | 0.29 |
| 789.5394 | 28.23  | 17.76 | 19.11 | 17.16 | 18.85 | 0.29 |
| 789.6176 | 26.25  | 19.78 | 15.78 | 16.48 | 17.47 | 1.57 |
| 789.9200 | 52.14  | 16.09 | 15.72 | 16.41 | 14.78 | 0.17 |

|          |        |       |       |       |       |      |
|----------|--------|-------|-------|-------|-------|------|
| 790.0461 | 36.71  | 16.92 | 18.84 | 15.87 | 18.67 | 0.31 |
| 790.4679 | 47.82  | 11.88 | 13.17 | 11.60 | 12.55 | 0.16 |
| 790.5726 | 25.45  | 21.33 | 20.05 | 20.32 | 20.54 | 1.02 |
| 790.9251 | 52.78  | 13.57 | 11.25 | 12.09 | 11.66 | 0.70 |
| 791.5417 | 24.82  | 19.26 | 15.99 | 17.05 | 17.67 | 1.49 |
| 791.5768 | 25.05  | 20.42 | 18.88 | 19.16 | 19.58 | 1.22 |
| 791.9122 | 277.32 | 13.00 | 16.35 | 16.57 | 15.80 | 0.95 |
| 791.9156 | 52.42  | 14.39 | 14.57 | 15.32 | 12.15 | 0.03 |
| 792.0535 | 48.99  | 13.64 | 12.09 | 10.51 | 13.30 | 0.49 |
| 792.0695 | 277.41 | 15.26 | 14.80 | 15.20 | 15.04 | 0.14 |
| 792.2416 | 277.55 | 15.74 | 16.41 | 16.49 | 16.22 | 0.41 |
| 792.3126 | 44.63  | 16.39 | 9.28  | 9.45  | 11.07 | 1.72 |
| 792.4092 | 277.11 | 16.00 | 16.31 | 16.29 | 16.08 | 0.13 |
| 792.4641 | 48.05  | 13.70 | 14.56 | 13.41 | 13.90 | 0.13 |
| 792.4923 | 52.47  | 12.46 | 14.39 | 14.49 | 13.42 | 0.60 |
| 792.5512 | 29.46  | 20.36 | 18.59 | 18.58 | 19.16 | 1.49 |
| 792.5888 | 25.19  | 21.59 | 20.52 | 20.59 | 20.59 | 1.05 |
| 793.5560 | 25.96  | 19.36 | 15.87 | 16.93 | 17.48 | 1.63 |
| 793.5928 | 25.11  | 20.67 | 19.42 | 19.51 | 19.28 | 0.96 |
| 794.3029 | 68.5   | 15.76 | 12.24 | 8.49  | 12.35 | 1.09 |
| 794.5095 | 39.82  | 15.01 | 16.91 | 17.43 | 16.91 | 0.85 |
| 794.5642 | 30.06  | 19.31 | 16.71 | 17.04 | 17.28 | 1.61 |
| 794.6059 | 26.42  | 21.40 | 20.29 | 20.24 | 20.16 | 1.12 |
| 794.9401 | 52.85  | 14.40 | 13.25 | 12.49 | 13.34 | 0.80 |
| 795.0581 | 53.88  | 18.41 | 20.97 | 20.84 | 20.28 | 1.39 |
| 795.1146 | 252.89 | 12.36 | 12.95 | 12.47 | 11.77 | 0.06 |
| 795.1158 | 60.08  | 13.72 | 14.44 | 13.98 | 13.63 | 0.15 |
| 795.3945 | 115.91 | 6.30  | 12.40 | 12.07 | 11.61 | 1.67 |
| 795.4909 | 53     | 13.14 | 13.65 | 12.98 | 13.49 | 0.16 |
| 795.5103 | 38.95  | 15.02 | 13.77 | 14.91 | 14.52 | 0.34 |
| 795.5717 | 25.81  | 18.05 | 12.50 | 14.75 | 13.93 | 1.51 |
| 795.6087 | 25.38  | 20.57 | 19.08 | 19.06 | 18.94 | 1.28 |
| 795.9397 | 52.68  | 13.64 | 12.92 | 12.12 | 13.05 | 0.50 |
| 796.0600 | 53.34  | 15.13 | 18.38 | 18.10 | 17.41 | 1.32 |
| 796.3980 | 45.72  | 10.41 | 11.86 | 11.57 | 12.21 | 0.51 |
| 796.4145 | 48.03  | 13.17 | 10.61 | 10.55 | 11.86 | 0.68 |
| 796.5243 | 38.32  | 19.99 | 20.22 | 20.85 | 20.14 | 0.41 |
| 796.5840 | 25.78  | 19.32 | 16.45 | 16.42 | 17.71 | 1.30 |
| 796.6202 | 29.73  | 19.43 | 17.55 | 16.52 | 17.38 | 0.97 |
| 797.0530 | 52.76  | 16.33 | 18.62 | 18.45 | 17.84 | 1.38 |
| 797.5282 | 38.62  | 18.58 | 19.04 | 19.64 | 18.88 | 0.52 |
| 797.5875 | 25.69  | 18.24 | 11.85 | 13.37 | 14.68 | 1.48 |
| 797.6237 | 25.24  | 18.22 | 13.27 | 13.48 | 13.40 | 1.22 |
| 798.0563 | 51.06  | 12.75 | 12.53 | 12.40 | 12.83 | 0.13 |
| 798.3984 | 45.87  | 11.90 | 11.20 | 10.95 | 11.87 | 0.33 |
| 798.4139 | 49.12  | 12.89 | 10.50 | 9.24  | 10.40 | 0.80 |
| 798.4878 | 46.98  | 11.81 | 13.64 | 12.05 | 12.59 | 0.42 |
| 798.4982 | 51.32  | 12.51 | 13.79 | 11.84 | 13.35 | 0.17 |
| 798.5393 | 39.2   | 18.98 | 18.65 | 19.06 | 18.85 | 0.12 |
| 799.5474 | 37.7   | 17.81 | 16.75 | 17.46 | 17.30 | 0.50 |
| 800.3441 | 45.4   | 14.58 | 8.77  | 7.43  | 8.97  | 1.32 |
| 800.4912 | 47.37  | 13.54 | 16.00 | 15.29 | 15.42 | 1.14 |
| 800.5451 | 39.65  | 16.38 | 12.39 | 12.87 | 12.89 | 1.04 |
| 800.8257 | 51.04  | 13.80 | 12.67 | 13.01 | 13.33 | 0.53 |
| 801.4130 | 262.47 | 15.92 | 14.36 | 14.92 | 15.20 | 0.63 |
| 801.5180 | 262.33 | 16.19 | 13.74 | 14.81 | 13.64 | 0.87 |

|          |        |       |       |       |       |      |
|----------|--------|-------|-------|-------|-------|------|
| 801.5348 | 25.93  | 13.60 | 13.95 | 12.94 | 14.23 | 0.01 |
| 801.6323 | 261    | 15.45 | 13.98 | 14.87 | 14.25 | 0.54 |
| 802.0466 | 26.11  | 13.45 | 15.27 | 13.80 | 15.63 | 0.51 |
| 802.3418 | 45.06  | 15.60 | 11.09 | 10.54 | 11.74 | 1.40 |
| 802.4812 | 45.68  | 14.75 | 12.65 | 13.65 | 13.58 | 0.85 |
| 802.4941 | 47.9   | 13.53 | 13.60 | 12.78 | 13.94 | 0.09 |
| 802.5312 | 39.97  | 15.47 | 9.95  | 13.04 | 11.35 | 1.26 |
| 802.5432 | 30.57  | 16.20 | 18.31 | 15.35 | 17.41 | 0.38 |
| 802.5540 | 26.74  | 9.12  | 15.64 | 12.99 | 15.63 | 1.15 |
| 802.5812 | 40.18  | 14.80 | 13.15 | 13.12 | 14.09 | 0.52 |
| 802.8184 | 50.94  | 13.96 | 12.82 | 12.70 | 13.33 | 0.74 |
| 802.9253 | 52.78  | 12.76 | 12.77 | 12.59 | 12.37 | 0.06 |
| 803.0473 | 28.13  | 14.50 | 14.36 | 13.73 | 14.42 | 0.20 |
| 803.4813 | 52.4   | 13.55 | 12.96 | 13.11 | 13.36 | 0.23 |
| 803.5502 | 27.93  | 14.80 | 17.19 | 12.32 | 15.89 | 0.11 |
| 803.9239 | 53.54  | 15.10 | 14.54 | 13.21 | 13.69 | 0.57 |
| 804.0560 | 26.19  | 10.82 | 14.18 | 10.37 | 13.78 | 0.50 |
| 804.3394 | 45.13  | 14.89 | 10.71 | 9.26  | 11.24 | 1.14 |
| 804.4296 | 45.69  | 8.94  | 11.98 | 11.94 | 13.08 | 0.91 |
| 804.5319 | 42.51  | 14.70 | 13.79 | 14.22 | 13.81 | 0.33 |
| 804.5506 | 34.33  | 21.24 | 20.54 | 20.82 | 20.47 | 0.62 |
| 805.5555 | 31.17  | 20.34 | 19.39 | 19.78 | 19.66 | 0.88 |
| 805.8920 | 52.36  | 14.65 | 12.10 | 13.01 | 10.79 | 0.73 |
| 806.0547 | 52.02  | 9.83  | 12.79 | 11.06 | 12.19 | 0.61 |
| 806.4265 | 45.73  | 10.52 | 11.94 | 11.75 | 12.47 | 0.56 |
| 806.4398 | 47.3   | 12.92 | 13.33 | 13.28 | 13.64 | 0.17 |
| 806.4904 | 50.97  | 12.47 | 14.93 | 12.50 | 12.73 | 0.38 |
| 806.5677 | 25.42  | 24.64 | 24.00 | 24.07 | 24.29 | 0.56 |
| 807.5573 | 26.23  | 16.21 | 14.75 | 15.01 | 13.97 | 0.38 |
| 807.5723 | 24.94  | 23.76 | 22.99 | 23.14 | 23.03 | 0.64 |
| 808.1471 | 65.36  | 12.55 | 11.61 | 12.97 | 11.59 | 0.17 |
| 808.4376 | 47.55  | 12.42 | 12.70 | 12.45 | 12.99 | 0.08 |
| 808.5236 | 47.59  | 13.30 | 15.07 | 14.56 | 14.83 | 0.53 |
| 808.5840 | 25.54  | 23.70 | 22.98 | 22.89 | 22.51 | 0.70 |
| 809.4796 | 44.65  | 14.21 | 12.09 | 12.80 | 13.06 | 0.76 |
| 809.5869 | 25.95  | 22.68 | 21.88 | 21.79 | 21.45 | 0.80 |
| 810.1272 | 248.74 | 14.92 | 12.54 | 13.52 | 13.55 | 0.79 |
| 810.3745 | 45.06  | 14.52 | 12.08 | 10.62 | 12.46 | 1.01 |
| 810.5253 | 48.02  | 13.44 | 14.55 | 14.59 | 14.71 | 0.51 |
| 810.5991 | 24.66  | 23.80 | 22.65 | 22.55 | 22.57 | 1.17 |
| 811.0321 | 54.12  | 17.82 | 18.87 | 19.14 | 18.61 | 0.85 |
| 811.6028 | 24.88  | 22.86 | 21.57 | 21.51 | 21.39 | 1.19 |
| 812.0339 | 54.05  | 14.72 | 14.30 | 15.29 | 15.06 | 0.03 |
| 812.1267 | 174.65 | 6.43  | 10.80 | 9.89  | 8.32  | 1.06 |
| 812.3718 | 45.2   | 15.30 | 12.15 | 11.54 | 12.98 | 1.35 |
| 812.5434 | 135.67 | 13.82 | 13.05 | 13.29 | 13.62 | 0.21 |
| 812.6103 | 25.64  | 21.18 | 19.47 | 19.49 | 19.65 | 1.42 |
| 813.0292 | 54.05  | 16.09 | 16.47 | 16.80 | 16.38 | 0.28 |
| 813.5443 | 26.27  | 16.67 | 16.02 | 15.14 | 16.19 | 0.64 |
| 813.5474 | 131.99 | 12.71 | 11.72 | 11.08 | 13.07 | 0.35 |
| 813.6165 | 25.38  | 19.56 | 16.79 | 17.16 | 17.73 | 1.57 |
| 814.0378 | 42.86  | 14.21 | 16.62 | 14.06 | 16.15 | 0.54 |
| 814.0572 | 276.14 | 15.76 | 16.04 | 16.10 | 16.04 | 0.16 |
| 814.1523 | 277.18 | 16.03 | 15.21 | 15.90 | 15.21 | 0.31 |
| 814.2436 | 275.27 | 15.73 | 15.28 | 15.80 | 15.33 | 0.15 |
| 814.3691 | 45.1   | 15.49 | 12.07 | 11.79 | 13.61 | 1.16 |

|          |        |       |       |       |       |      |
|----------|--------|-------|-------|-------|-------|------|
| 814.4720 | 50.73  | 13.37 | 13.93 | 13.76 | 13.52 | 0.27 |
| 814.5553 | 24.64  | 14.57 | 14.48 | 14.12 | 14.34 | 0.10 |
| 814.6249 | 26.04  | 16.96 | 8.01  | 8.97  | 11.30 | 1.69 |
| 814.9383 | 54.93  | 15.08 | 12.97 | 11.02 | 11.72 | 1.03 |
| 815.0476 | 25.63  | 12.58 | 13.40 | 10.26 | 13.86 | 0.10 |
| 815.4726 | 52.51  | 13.42 | 12.06 | 12.10 | 12.10 | 0.75 |
| 815.5592 | 25.61  | 14.32 | 16.15 | 13.05 | 14.98 | 0.15 |
| 815.9180 | 279.09 | 14.46 | 15.23 | 15.18 | 14.98 | 0.37 |
| 815.9289 | 52.5   | 15.02 | 14.97 | 14.40 | 14.77 | 0.27 |
| 816.0634 | 26.06  | 13.79 | 13.04 | 10.97 | 13.74 | 0.64 |
| 816.0823 | 278.97 | 11.55 | 15.37 | 15.46 | 14.12 | 0.99 |
| 816.4656 | 46.95  | 13.55 | 15.24 | 14.37 | 14.94 | 0.81 |
| 816.5882 | 26.59  | 18.40 | 15.07 | 16.52 | 17.31 | 1.26 |
| 817.0399 | 53.43  | 17.23 | 20.53 | 20.29 | 19.23 | 1.23 |
| 817.4700 | 53.04  | 12.51 | 12.20 | 11.46 | 11.72 | 0.55 |
| 817.5924 | 25.01  | 17.25 | 11.53 | 13.57 | 14.72 | 1.48 |
| 817.9312 | 52.52  | 13.31 | 13.22 | 12.66 | 13.20 | 0.15 |
| 818.0489 | 53.32  | 13.62 | 15.20 | 14.70 | 14.59 | 0.56 |
| 818.4697 | 48.64  | 13.84 | 13.84 | 12.31 | 14.09 | 0.25 |
| 818.5100 | 40.31  | 15.60 | 16.34 | 17.70 | 15.76 | 0.42 |
| 818.6044 | 25.11  | 19.34 | 17.75 | 17.92 | 18.27 | 0.96 |
| 818.7876 | 52.99  | 11.27 | 11.51 | 11.18 | 10.92 | 0.02 |
| 819.0400 | 53.23  | 14.72 | 17.98 | 17.64 | 16.51 | 1.22 |
| 819.5170 | 40.49  | 15.70 | 13.79 | 14.95 | 13.65 | 0.60 |
| 819.6081 | 24.73  | 18.53 | 14.92 | 16.37 | 17.00 | 1.34 |
| 820.4078 | 45.11  | 13.05 | 13.07 | 13.08 | 13.00 | 0.01 |
| 820.4168 | 278.03 | 16.08 | 15.26 | 15.57 | 15.20 | 0.39 |
| 820.5247 | 38.6   | 19.25 | 19.95 | 20.48 | 19.69 | 0.69 |
| 820.5840 | 25.04  | 17.62 | 13.40 | 14.78 | 16.36 | 1.21 |
| 820.5859 | 278.32 | 13.92 | 16.46 | 15.86 | 15.83 | 0.78 |
| 820.6200 | 25.06  | 18.82 | 16.46 | 16.96 | 17.09 | 1.17 |
| 820.7451 | 278.37 | 15.55 | 14.70 | 15.06 | 15.11 | 0.37 |
| 820.9153 | 278.38 | 15.01 | 15.30 | 15.51 | 15.06 | 0.18 |
| 821.5280 | 38.89  | 18.02 | 18.97 | 19.37 | 18.92 | 0.87 |
| 821.5891 | 24.8   | 16.08 | 8.17  | 9.36  | 10.75 | 1.67 |
| 821.6238 | 24.84  | 17.60 | 11.09 | 13.86 | 13.10 | 1.21 |
| 822.4052 | 45.22  | 13.86 | 14.11 | 13.14 | 13.53 | 0.09 |
| 822.4244 | 48.67  | 12.20 | 8.87  | 8.96  | 9.59  | 0.95 |
| 822.5290 | 42.91  | 14.83 | 13.51 | 13.57 | 14.29 | 0.67 |
| 822.5401 | 40.31  | 15.72 | 16.52 | 17.28 | 17.22 | 0.62 |
| 822.5596 | 32.87  | 15.36 | 11.58 | 13.86 | 12.21 | 0.84 |
| 822.5994 | 25.15  | 17.48 | 12.76 | 13.01 | 14.82 | 1.31 |
| 822.6356 | 27.13  | 17.57 | 12.56 | 12.36 | 13.59 | 1.29 |
| 823.2624 | 271.68 | 14.82 | 14.58 | 15.73 | 15.19 | 0.14 |
| 823.4285 | 273.17 | 13.86 | 17.94 | 17.40 | 17.37 | 1.23 |
| 823.4290 | 45.6   | 14.53 | 12.52 | 12.65 | 13.58 | 0.66 |
| 823.5436 | 41.19  | 14.84 | 13.76 | 15.31 | 14.90 | 0.14 |
| 823.5852 | 270.97 | 15.30 | 14.15 | 14.55 | 14.33 | 0.46 |
| 823.5975 | 273.42 | 13.67 | 18.14 | 17.83 | 17.02 | 1.17 |
| 823.6396 | 25.09  | 15.98 | 8.11  | 7.96  | 9.59  | 1.72 |
| 823.7603 | 273.75 | 15.87 | 15.80 | 15.87 | 15.64 | 0.04 |
| 823.9285 | 270.97 | 15.30 | 14.97 | 15.85 | 15.19 | 0.01 |
| 824.0967 | 270.34 | 15.79 | 14.95 | 15.86 | 15.38 | 0.23 |
| 824.2619 | 270.82 | 15.97 | 14.45 | 15.88 | 14.76 | 0.47 |
| 824.3952 | 44.98  | 13.81 | 12.01 | 11.39 | 12.56 | 0.85 |
| 824.4947 | 46.54  | 13.32 | 13.72 | 13.17 | 14.71 | 0.17 |

|          |        |       |       |       |       |      |
|----------|--------|-------|-------|-------|-------|------|
| 824.5590 | 38.78  | 17.50 | 16.11 | 16.94 | 16.69 | 0.60 |
| 824.6141 | 25.33  | 15.62 | 7.81  | 8.18  | 9.47  | 1.94 |
| 825.2567 | 278.55 | 16.00 | 15.28 | 15.52 | 15.25 | 0.38 |
| 825.4254 | 278.57 | 16.13 | 15.11 | 15.59 | 15.80 | 0.40 |
| 825.5623 | 39.46  | 15.75 | 11.62 | 13.78 | 12.31 | 0.90 |
| 825.5898 | 278.76 | 15.67 | 15.49 | 15.89 | 15.71 | 0.00 |
| 825.9603 | 54.7   | 14.38 | 13.87 | 11.79 | 12.21 | 0.45 |
| 826.4940 | 47.06  | 13.29 | 13.96 | 13.62 | 14.34 | 0.38 |
| 827.5886 | 274.57 | 16.49 | 15.91 | 15.96 | 16.17 | 0.28 |
| 827.7547 | 280.66 | 17.06 | 22.13 | 22.11 | 20.97 | 1.58 |
| 827.9213 | 280.78 | 17.37 | 23.51 | 23.48 | 22.33 | 1.71 |
| 828.0887 | 281.14 | 17.38 | 23.96 | 23.91 | 22.75 | 1.73 |
| 828.2557 | 279.56 | 16.79 | 23.88 | 23.81 | 22.65 | 1.72 |
| 828.4225 | 279.48 | 17.15 | 23.45 | 23.42 | 22.24 | 1.73 |
| 828.5501 | 39.43  | 18.61 | 16.93 | 17.16 | 16.73 | 0.92 |
| 828.5899 | 279.59 | 16.45 | 22.75 | 22.73 | 21.53 | 1.73 |
| 828.5904 | 45.71  | 10.13 | 10.49 | 10.17 | 12.33 | 0.18 |
| 828.7562 | 280.86 | 16.95 | 21.80 | 21.78 | 20.73 | 1.67 |
| 828.9231 | 279.67 | 16.42 | 20.67 | 20.63 | 19.71 | 1.65 |
| 829.0925 | 278.77 | 16.20 | 18.19 | 18.19 | 17.71 | 1.13 |
| 829.2608 | 278.79 | 15.75 | 15.22 | 15.70 | 15.64 | 0.16 |
| 829.5547 | 39.3   | 16.98 | 13.48 | 15.09 | 14.66 | 1.18 |
| 830.4285 | 44.93  | 12.25 | 12.13 | 11.63 | 13.01 | 0.07 |
| 830.5684 | 28.37  | 21.07 | 20.06 | 20.34 | 20.21 | 0.90 |
| 830.9188 | 281.01 | 16.26 | 15.91 | 15.85 | 16.01 | 0.21 |
| 831.5712 | 26.54  | 20.13 | 18.94 | 19.23 | 19.28 | 1.00 |
| 831.9074 | 52.16  | 15.57 | 17.37 | 17.38 | 16.46 | 0.97 |
| 832.4357 | 45.22  | 13.96 | 14.88 | 13.63 | 15.24 | 0.21 |
| 832.5836 | 27.91  | 21.25 | 20.22 | 20.48 | 20.36 | 0.74 |
| 832.9036 | 52.37  | 13.76 | 12.64 | 12.58 | 12.97 | 0.70 |
| 833.0136 | 53.18  | 17.38 | 18.73 | 19.12 | 18.00 | 1.07 |
| 833.4698 | 32.07  | 15.54 | 13.74 | 14.06 | 14.75 | 0.91 |
| 833.5867 | 26.81  | 20.45 | 19.16 | 19.41 | 19.66 | 1.16 |
| 833.9045 | 52.13  | 14.30 | 13.72 | 13.58 | 13.62 | 0.49 |
| 834.0176 | 52.88  | 14.62 | 13.41 | 13.14 | 13.30 | 0.81 |
| 834.1461 | 54.97  | 15.04 | 17.04 | 16.36 | 16.47 | 0.87 |
| 834.2471 | 278.72 | 15.75 | 16.10 | 16.22 | 15.94 | 0.28 |
| 834.4208 | 278.81 | 15.67 | 16.55 | 16.81 | 16.24 | 0.62 |
| 834.4296 | 45.48  | 12.87 | 14.23 | 12.60 | 14.10 | 0.23 |
| 834.5853 | 277.02 | 14.80 | 15.93 | 16.03 | 15.11 | 0.44 |
| 834.5988 | 26.54  | 21.88 | 21.03 | 21.22 | 21.36 | 0.78 |
| 834.7518 | 278.74 | 15.49 | 15.39 | 15.59 | 15.59 | 0.00 |
| 834.9184 | 278.78 | 15.62 | 15.92 | 16.07 | 15.89 | 0.22 |
| 835.0140 | 53.13  | 13.15 | 13.43 | 13.83 | 13.16 | 0.21 |
| 835.2991 | 266.59 | 14.91 | 13.87 | 14.87 | 14.12 | 0.33 |
| 835.4222 | 267.25 | 15.38 | 14.08 | 15.20 | 14.67 | 0.39 |
| 835.5227 | 266.63 | 15.48 | 13.55 | 14.25 | 13.67 | 0.71 |
| 835.6020 | 26.81  | 21.38 | 20.06 | 20.28 | 20.47 | 1.25 |
| 835.6489 | 28.42  | 15.28 | 13.46 | 13.11 | 13.50 | 0.81 |
| 836.0186 | 52.91  | 10.44 | 12.61 | 12.55 | 12.01 | 0.68 |
| 836.5436 | 149.97 | 13.10 | 12.45 | 12.76 | 13.40 | 0.12 |
| 836.6137 | 25.73  | 21.05 | 19.54 | 19.58 | 19.55 | 1.35 |
| 837.5470 | 124.6  | 12.86 | 11.00 | 10.92 | 13.40 | 0.47 |
| 837.6178 | 25.4   | 19.93 | 18.43 | 18.32 | 18.34 | 1.20 |
| 838.5576 | 128.46 | 12.53 | 12.42 | 11.84 | 12.87 | 0.08 |
| 838.6289 | 28.25  | 19.57 | 16.82 | 16.89 | 16.83 | 1.54 |

|          |        |       |       |       |       |      |
|----------|--------|-------|-------|-------|-------|------|
| 839.0208 | 53.4   | 15.92 | 17.82 | 17.48 | 16.76 | 1.19 |
| 839.6337 | 25.25  | 18.30 | 13.81 | 13.74 | 14.37 | 1.47 |
| 840.0229 | 53.12  | 11.46 | 14.60 | 13.93 | 13.02 | 0.95 |
| 840.4641 | 45.29  | 12.23 | 14.81 | 13.50 | 14.59 | 0.89 |
| 840.6390 | 34     | 15.39 | 8.00  | 7.67  | 10.08 | 1.53 |
| 841.0244 | 53.18  | 12.30 | 16.67 | 16.01 | 14.45 | 0.96 |
| 842.4633 | 45.74  | 13.59 | 15.46 | 14.59 | 15.06 | 0.85 |
| 844.2503 | 278.59 | 15.57 | 16.41 | 16.25 | 15.68 | 0.50 |
| 844.4149 | 278.55 | 15.06 | 16.87 | 16.61 | 15.39 | 0.88 |
| 844.5242 | 39.15  | 18.36 | 19.17 | 19.87 | 19.00 | 0.75 |
| 844.5790 | 278.53 | 15.19 | 18.02 | 17.74 | 16.35 | 1.06 |
| 844.7509 | 278.58 | 15.87 | 16.35 | 16.30 | 15.92 | 0.28 |
| 844.9190 | 277.96 | 15.51 | 15.79 | 15.91 | 16.03 | 0.19 |
| 845.5278 | 39.84  | 17.45 | 17.75 | 18.64 | 18.33 | 0.64 |
| 845.8688 | 264.42 | 14.73 | 14.60 | 15.50 | 14.75 | 0.10 |
| 845.9679 | 263.18 | 15.47 | 14.54 | 14.97 | 14.74 | 0.35 |
| 846.0670 | 264.61 | 15.73 | 14.67 | 15.31 | 14.84 | 0.39 |
| 846.1661 | 262.96 | 14.77 | 14.58 | 15.00 | 14.46 | 0.02 |
| 846.5403 | 40.27  | 17.30 | 17.56 | 17.97 | 17.17 | 0.29 |
| 847.0058 | 52.76  | 12.81 | 12.24 | 11.88 | 12.57 | 0.38 |
| 847.5451 | 40.69  | 14.07 | 13.84 | 14.36 | 13.52 | 0.03 |
| 847.8798 | 51.78  | 14.41 | 13.53 | 13.77 | 12.85 | 0.50 |
| 848.4069 | 67.42  | 10.25 | 11.97 | 12.48 | 11.93 | 0.63 |
| 848.5550 | 41.01  | 17.83 | 17.25 | 17.71 | 16.86 | 0.30 |
| 848.9860 | 53.51  | 14.53 | 12.19 | 13.05 | 11.67 | 0.65 |
| 849.5485 | 44.42  | 14.02 | 11.23 | 11.67 | 12.25 | 0.80 |
| 849.5647 | 41.12  | 16.00 | 13.65 | 14.75 | 14.22 | 0.92 |
| 849.8712 | 51.75  | 14.28 | 12.49 | 12.43 | 11.60 | 0.96 |
| 850.4923 | 45.2   | 14.49 | 14.07 | 13.29 | 13.92 | 0.43 |
| 852.4890 | 45.29  | 12.55 | 12.46 | 11.68 | 12.74 | 0.18 |
| 852.5536 | 35.39  | 15.99 | 10.17 | 12.17 | 12.52 | 1.29 |
| 854.5678 | 25.79  | 19.25 | 18.03 | 18.37 | 18.34 | 0.89 |
| 854.9949 | 52.85  | 16.60 | 18.67 | 18.91 | 17.37 | 1.07 |
| 855.5712 | 25.06  | 18.37 | 15.97 | 17.03 | 16.94 | 1.00 |
| 855.9952 | 52.76  | 13.82 | 12.57 | 13.04 | 12.68 | 0.64 |
| 856.4556 | 48.83  | 9.56  | 10.16 | 8.75  | 9.78  | 0.01 |
| 856.5824 | 27.1   | 17.76 | 14.58 | 15.82 | 15.08 | 0.98 |
| 856.9909 | 52.88  | 14.18 | 13.48 | 13.61 | 13.20 | 0.53 |
| 857.0730 | 263.05 | 12.63 | 14.50 | 14.55 | 14.35 | 0.57 |
| 857.1626 | 266.07 | 15.45 | 13.58 | 14.68 | 13.94 | 0.64 |
| 857.2567 | 264.75 | 14.42 | 13.53 | 14.40 | 13.65 | 0.30 |
| 857.2720 | 268.84 | 16.07 | 16.62 | 16.33 | 16.56 | 0.25 |
| 857.3748 | 270.27 | 16.37 | 15.64 | 15.59 | 16.11 | 0.41 |
| 857.4725 | 270.47 | 16.15 | 16.08 | 16.16 | 16.25 | 0.01 |
| 857.5781 | 263.4  | 12.62 | 14.50 | 15.68 | 14.83 | 0.78 |
| 857.5862 | 24.83  | 15.86 | 11.34 | 11.74 | 12.47 | 1.23 |
| 857.6730 | 267.04 | 15.84 | 15.94 | 15.74 | 16.19 | 0.03 |
| 857.7724 | 264.74 | 16.12 | 14.44 | 15.25 | 15.06 | 0.68 |
| 857.8736 | 263.06 | 14.35 | 14.44 | 15.73 | 14.84 | 0.28 |
| 857.9951 | 52.7   | 13.26 | 12.18 | 11.95 | 12.10 | 0.65 |
| 858.5989 | 24.86  | 17.73 | 14.65 | 15.70 | 15.92 | 1.25 |
| 859.6057 | 24.39  | 15.70 | 11.51 | 12.25 | 13.45 | 1.32 |
| 860.6153 | 24.64  | 16.85 | 12.68 | 13.16 | 13.76 | 1.42 |
| 861.0088 | 53.36  | 16.38 | 18.78 | 18.38 | 17.47 | 1.18 |
| 861.6181 | 24.8   | 16.28 | 10.16 | 11.06 | 11.50 | 1.71 |
| 862.0090 | 53.31  | 13.25 | 13.64 | 13.11 | 13.46 | 0.10 |

|           |        |       |       |       |       |      |
|-----------|--------|-------|-------|-------|-------|------|
| 862.6301  | 25.45  | 17.14 | 12.05 | 12.81 | 12.87 | 1.44 |
| 862.9982  | 53.18  | 14.34 | 14.15 | 13.50 | 13.68 | 0.39 |
| 865.2035  | 64.61  | 13.62 | 13.89 | 13.22 | 13.67 | 0.01 |
| 870.9698  | 52.81  | 14.90 | 12.67 | 13.42 | 12.63 | 0.98 |
| 871.4322  | 278.95 | 13.07 | 15.92 | 16.40 | 14.96 | 1.11 |
| 871.5910  | 279.23 | 15.54 | 16.26 | 16.24 | 15.56 | 0.40 |
| 872.5585  | 42.43  | 14.71 | 13.22 | 13.43 | 13.87 | 0.63 |
| 876.9786  | 52.75  | 15.59 | 16.06 | 16.26 | 15.00 | 0.32 |
| 877.9763  | 52.58  | 13.73 | 12.10 | 12.87 | 12.47 | 0.72 |
| 878.5687  | 25.85  | 17.51 | 14.40 | 16.16 | 16.89 | 1.04 |
| 878.9756  | 52.73  | 13.48 | 13.34 | 13.43 | 13.19 | 0.08 |
| 879.3919  | 273.47 | 14.98 | 14.80 | 15.72 | 15.42 | 0.14 |
| 879.5716  | 24.27  | 16.42 | 9.17  | 13.46 | 14.24 | 1.34 |
| 879.6404  | 274.37 | 16.06 | 14.64 | 15.53 | 15.03 | 0.52 |
| 879.8821  | 273.99 | 15.27 | 14.74 | 15.66 | 14.89 | 0.09 |
| 880.5804  | 32.32  | 15.44 | 10.41 | 11.10 | 13.15 | 1.21 |
| 882.9881  | 53.32  | 16.28 | 18.38 | 17.79 | 16.91 | 0.83 |
| 883.9908  | 53.19  | 13.75 | 12.45 | 12.15 | 12.40 | 0.87 |
| 884.9827  | 53.38  | 13.76 | 13.12 | 12.48 | 12.88 | 0.67 |
| 885.6611  | 30.27  | 12.78 | 10.36 | 10.63 | 11.22 | 0.66 |
| 887.1808  | 64.11  | 10.56 | 10.98 | 9.64  | 9.49  | 0.13 |
| 892.9572  | 52.61  | 14.80 | 12.39 | 13.26 | 12.53 | 1.04 |
| 898.0916  | 55.08  | 14.13 | 14.51 | 13.09 | 14.58 | 0.06 |
| 898.9637  | 52.66  | 15.02 | 15.09 | 15.04 | 14.24 | 0.05 |
| 900.9529  | 52.72  | 13.30 | 12.34 | 12.51 | 12.15 | 0.55 |
| 904.9672  | 53.45  | 15.54 | 16.82 | 15.78 | 15.82 | 0.58 |
| 914.9293  | 52.48  | 13.65 | 11.86 | 12.65 | 11.24 | 0.77 |
| 920.0684  | 53.47  | 13.66 | 13.45 | 13.09 | 13.55 | 0.31 |
| 920.9417  | 52.87  | 14.65 | 14.60 | 14.28 | 13.82 | 0.22 |
| 942.0492  | 53.11  | 13.21 | 13.28 | 12.80 | 13.11 | 0.12 |
| 952.4125  | 263.44 | 15.06 | 14.73 | 15.90 | 14.85 | 0.07 |
| 952.5269  | 263.93 | 14.06 | 14.46 | 15.45 | 14.47 | 0.43 |
| 952.6334  | 264.32 | 11.13 | 15.04 | 15.90 | 13.91 | 1.22 |
| 952.7480  | 262.55 | 13.51 | 14.33 | 15.36 | 14.27 | 0.57 |
| 961.2098  | 213.47 | 13.20 | 12.69 | 12.74 | 12.96 | 0.45 |
| 964.0315  | 53.05  | 12.90 | 12.91 | 12.14 | 12.40 | 0.30 |
| 986.0107  | 52.92  | 11.96 | 11.72 | 10.67 | 11.25 | 0.53 |
| 993.3053  | 278.47 | 14.95 | 15.93 | 16.19 | 15.36 | 0.75 |
| 993.5028  | 278.77 | 15.23 | 16.40 | 16.42 | 16.20 | 0.72 |
| 993.7046  | 278.59 | 14.93 | 16.33 | 16.43 | 15.41 | 0.91 |
| 993.9022  | 278.51 | 15.45 | 15.68 | 15.70 | 15.57 | 0.14 |
| 1059.8416 | 65.16  | 13.95 | 12.27 | 11.74 | 11.83 | 1.25 |
| 1274.1329 | 31.99  | 15.53 | 15.04 | 13.15 | 13.76 | 0.84 |
| 1274.1693 | 31.93  | 15.85 | 15.58 | 14.99 | 15.01 | 0.71 |
